# Supplementary material for: An in vitro stem cell model of human epiblast and yolk sac interaction
Source: eLife. 2021 Aug 17;10:e63930. doi: 10.7554/eLife.63930 (PMC8370770; doi:10.7554/eLife.63930)
Supplement: Figure 1—figure supplement 1—source data 1. [file elife-63930-fig1-figsupp1-data1.xlsx]

## Sheet: F1FS1C
Fluorescence intensity analysis of SOX2 and SOX17 in first screen using Fiji
units= fluorescence intensity (a.u.)
Average fluorescence intensity (A.U.)	112.165	10.8851		32.2418	14.7316		27.1259	4.59235		11.43	4.1891		9.83062	6.38376		7.01092	11.158		11.7242	6.93652		17.1533	9.78723		19.7129	0.505284		28.0033	0.808913		11.1443	4.65125		14.6475	5.56417		8.20156	2.1588		35.4078	17.7696		25.7226	28.3421		66.9464	5.71069		8.95791
Standard Deviation	146.233	44.9647		27.2503	32.8788		28.8359	18.1978		7.75893	16.4812		9.8967	23.8622		5.54074	40.426		9.98979	22.6529		9.04571	28.0803		12.7345	1.62611		19.6439	6.53537		7.15088	13.3676		7.17823	15.8558		11.0752	10.6081		18.3096	42.1585		17.0163	42.699		22.499	21.3755		5.55693
1	SOX2	SOX17	2	SOX2	SOX17	3	SOX2	SOX17	4	SOX2	SOX17	5	SOX2	SOX17	6	SOX2	SOX17	7	SOX2	SOX17	8	SOX2	SOX17	9	SOX2	SOX17	10	SOX2	SOX17	11	SOX2	SOX17	12	SOX2	SOX17	13	SOX2	SOX17	14	SOX2	SOX17	15	sox2	sox17	16	sox2	SOX17	17	SOX2
	34.82	0.08		13.456	0.057		2.761	63.283		17.158	0.312		0.662	0.113		1.583	0.267		30.229	0.583		10.442	1.815		12.107	0.117		6.77	0.124		9.112	2.165		17.452	0.142		1.172	0.18		23.606	123.4		41.051	0.382		103.63	0.4		7.865
	69.524	0.035		8.412	0.082		1.985	36.051		11.18	0.318		1.014	0.137		2.885	0.232		19.298	0.475		19.518	1.869		14.727	0.137		18.865	0.104		2.904	0.148		22.817	0.192		0.863	0.161		5.275	2.778		13.468	2.789		68.602	0.373		10.442
	85.083	0.053		11.769	0.084		3.714	76.315		13.773	0.212		0.763	0.258		4.831	0.239		1.284	0.36		7.364	1.784		12.739	0.124		19.843	0.195		7.511	0.179		34.464	0.149		0.9	0.138		18.176	145.093		33.615	0.409		70.746	0.327		6.187
	48.528	0.068		8.078	0.061		2.335	50.758		16.394	0.323		0.747	0.475		1.774	0.286		19.816	0.231		11.136	3.49		13.525	0.149		12.102	0.149		3.079	0.26		7.169	0.097		0.797	0.13		32.017	0.778		43.045	0.418		78.138	0.504		7.722
	34.589	0.04		15.629	0.066		2.876	63.214		16.744	0.262		0.941	0.149		2.31	0.273		28.767	0.309		15.81	10.746		18.347	0.132		39.513	0.172		5.455	28.919		10.209	0.123		0.88	0.184		30.272	0.311		40.376	0.408		85.351	0.335		6.144
	88.149	0.059		16.471	0.057		2.999	69.462		13.748	0.286		1.319	46.642		3.062	0.308		9.758	0.386		9.622	2.067		10.367	0.132		18.113	0.173		4.686	42.095		10.95	0.149		0.928	0.159		15.002	144.629		35.279	0.386		70.962	0.474		6.483
	64.318	0.066		23.694	0.066		2.988	70.729		22.92	6.944		1.634	38.887		2.239	0.402		5.136	0.513		13.129	1.818		8.889	0.155		43.011	0.204		4.645	39.703		10.323	0.136		1.092	0.157		9.33	69.465		48.114	0.335		70.411	0.476		8.169
	49.222	0.109		23.874	0.055		3.46	88.104		13.849	4.051		1.192	29.948		5.388	0.24		1.888	0.675		17.488	2.04		21.975	0.108		14.548	0.143		1.509	2.543		16.837	0.127		0.984	0.152		9.791	69.997		46.264	0.345		79.593	0.359		10.41
	40.43	0.052		5.148	49.745		3.584	120.011		15.084	0.406		0.666	0.207		4.571	0.29		1.455	0.481		9.304	2.159		13.803	0.317		32.291	0.165		1.497	2.811		7.113	0.133		1.171	0.109		7.332	54.014		43.069	0.324		75.651	0.445		11.915
	77.217	0.092		4.885	41.947		3.031	74.329		4.912	0.322		0.433	0.106		2.795	0.545		2.498	0.359		12.69	2.154		15.109	0.134		30.505	0.167		2.839	10.555		20.794	0.135		0.889	0.115		33.854	0.363		37.504	0.299		72.338	0.411		7.226
	31.986	0.06		7.42	79.12		0.909	0.461		7.024	0.334		0.433	0.139		3.855	0.228		1.341	0.472		21.347	2.182		5.923	0.166		48.465	0.202		5.168	1.092		16.46	0.16		0.892	0.101		21.655	21.255		41.113	0.317		61.471	0.521		26.963
	145.295	0.049		8.303	95.845		3.119	77.071		6.022	0.886		0.41	0.203		5.147	0.966		2.262	0.306		15.068	1.985		16.596	0.131		12.523	0.193		3.801	26.006		15.114	0.208		1.158	0.207		28.661	0.523		29.831	0.417		73.651	0.444		10.954
	38.695	0.182		8.228	85.013		2.564	74.477		8.762	0.472		1.493	51.723		3.787	0.355		1.812	0.3		12.138	10.758		19.7	0.134		38.809	0.178		4.574	21.128		8.859	0.386		0.866	0.101		30.043	0.466		48.35	0.352		76.993	0.427		6.763
	130.488	0.087		5.743	55.366		3.372	96.134		4.646	0.384		0.465	0.19		4.866	0.373		1.499	0.271		13.625	2.418		16.218	0.148		17.176	0.261		4.843	26.028		11.879	0.189		0.969	0.165		6.726	32.869		39.116	0.406		57.397	0.548		10.364
	54.196	0.051		6.817	79.68		20.578	0.499		12.337	0.364		1.257	37.652		4.766	0.545		2.215	0.316		8.792	2.04		13.647	0.139		46.754	0.179		6.899	69.252		8.408	0.117		0.955	0.201		4.153	14.286		45.554	0.297		69.733	0.465		8.007
	47.429	0.051		6.593	53.358		2.011	39.873		3.424	0.368		0.527	0.164		2.849	0.508		1.831	0.329		12.276	2.127		17.867	0.266		19.54	0.127		5.964	25.93		12.426	0.124		1.149	0.182		10.617	62.762		29.835	0.328		58.781	0.573		5.932
	86.356	0.113		7.947	86.608		3.427	97.474		12.737	0.336		0.738	0.165		1.98	0.241		1.822	0.29		9.185	2.015		16.722	0.135		33.415	0.145		3.488	0.203		6.558	0.125		1.091	0.137		23.455	179.978		44.501	0.341		64.236	0.471		7.203
	44.074	0.226		8.82	88.135		2.727	91.418		8.324	0.37		0.804	0.178		1.629	0.284		4.114	0.889		15.986	17.034		16.393	0.118		19.679	0.189		5.196	0.263		8.216	0.118		0.937	0.328		23.458	0.203		20.945	0.394		69.359	0.481		7.929
	51.536	0.081		6.475	68.565		17.071	0.263		7.115	0.418		0.435	0.092		8.129	0.34		2.711	2.232		12.642	1.927		9.211	0.172		45.276	0.209		3.541	0.231		17.645	0.18		0.846	0.106		15.133	56.82		37.276	0.28		85.93	0.365		5.951
	33.143	0.113		2.083	0.202		21.018	0.547		7.581	0.563		0.752	0.144		5.058	0.386		4.614	0.341		9.921	2.202		7.733	0.243		25.287	0.208		1.723	0.179		14.928	0.092		0.748	0.174		8.96	61.023		33.459	0.29		67.156	0.467		11.415
	66.169	0.19		6.858	53.557		13.437	0.55		4.895	0.335		0.397	0.118		2.983	0.683		6.561	0.387		11.885	10.286		10.058	0.144		29.451	0.442		8.16	0.2		23.646	0.163		0.873	0.114		6.368	43.7		52.916	0.303		61.887	0.563		7.157
	65.36	0.061		7.913	88.405		13.488	0.566		8.117	0.322		4.823	0.267		7.573	0.211		4.86	0.33		6.908	2.401		9.385	0.139		27.629	0.163		11.57	0.611		18.384	0.127		0.933	0.117		6.889	40.758		46.969	0.258		78.142	0.465		19.989
	32.101	0.027		6.686	73.26		18	0.226		9.215	0.369		1.237	0.202		1.725	0.366		1.9	4.322		13.667	6.592		19.376	0.112		26.938	0.454		2.794	0.254		27.663	0.179		1.02	0.134		20.033	132.335		38.72	0.374		93.238	0.346		9.369
	137.949	0.105		6.333	71.132		8.938	0.443		10.801	0.433		2.993	0.236		2.203	0.242		1.951	0.311		13.967	9.161		27.01	0.173		36	0.144		10.239	0.586		15.445	0.144		1.004	0.142		10.186	41.647		38.571	0.42		66.492	0.546		12.54
	48.991	0.309		9.489	93.642		13.045	0.424		9.653	0.925		0.853	0.205		9.609	0.27		1.333	0.377		16.275	2.797		19.148	0.607		25.288	0.202		13.582	1.267		26.182	0.17		0.832	0.097		3.451	0.384		30.638	0.36		56.45	0.565		9.935
	32.159	0.103		6.03	52.317		19.374	0.565		11.295	0.655		1.567	0.213		10.322	0.238		6.548	0.377		11.463	1.692		33.908	0.205		32.136	0.201		15.068	1.012		19.65	0.177		0.916	0.113		55.593	0.24		51.487	0.356		56.811	0.447		15.692
	95.668	0.062		7.193	58.504		25.845	0.89		2.654	1.031		0.564	0.16		2.35	0.236		17.415	0.369		10.579	3.717		32.472	0.199		33.583	0.171		12.713	0.67		13.219	0.146		1.106	0.134		31.243	0.312		40.115	0.284		84.834	0.432		19.813
	56.799	0.071		6.332	69.587		3.468	84.984		3.589	1.367		2.704	0.192		6.625	0.363		25.449	0.378		6.701	2.339		22.145	0.619		18.68	0.365		8.355	0.362		30.263	0.36		1.108	0.105		3.569	0.471		39.258	0.327		66.005	0.619		9.275
	31.118	0.128		6.023	61.357		19.278	0.612		11.129	0.272		6.512	0.152		5.403	0.75		30.693	0.299		7.246	2.804		21.569	0.329		22.379	0.152		4.015	0.236		24.348	0.233		0.708	0.096		5.582	2.347		48.059	0.273		62.8	0.429		10.902
	44.19	0.039		5.332	44.359		7.17	0.382		10.336	0.27		1.205	0.422		5.964	0.518		15.598	0.212		8.665	1.768		10.261	0.387		21.338	0.428		3.847	0.472		22.014	0.194		1.046	0.113		41.735	0.24		42.121	0.311		107.551	0.478		15.863
	81.381	0.128		4.081	46.454		13.968	0.574		10.638	0.293		5.267	0.143		4.622	0.428		7.636	0.414		8.441	2.098		23.14	0.31		19.626	0.204		7.94	0.327		23.119	0.141		0.868	0.135		4.144	0.864		36.28	0.387		80.639	0.447		10.537
	79.531	0.07		8.48	84.98		8.164	0.53		6.324	0.272		2.958	0.217		4.803	0.554		15.417	1.486		14.088	2.551		17.343	0.207		24.218	0.22		8.301	0.24		20.26	0.208		1.179	0.203		29.619	0.166		31.623	0.423		54.201	0.505		6.364
	101.973	0.109		5.278	49.303		6.809	0.635		14.769	0.296		1.735	0.836		2.595	0.35		8.656	0.387		14.026	2.088		18.011	0.283		38.48	0.158		11.226	0.879		24.088	0.345		1.114	0.211		11.706	124.265		42.562	0.311		71.341	0.788		10.901
	32.795	0.201		5.57	56.315		4.456	0.629		4.185	0.22		4.679	0.189		2.508	1.193		21.62	0.283		9.434	2.545		21.073	0.344		20.27	0.661		4.492	0.276		26.413	0.172		1.011	0.153		2.958	0.855		35.898	0.317		113.978	0.411		22.596
	61.947	0.095		4.587	48.378		3.633	0.596		8.666	0.29		4.173	0.271		2.357	0.289		7.358	0.309		15.534	2.32		7.322	20.953		35.878	0.154		10.903	1.474		22.432	0.181		1.032	0.14		3.87	1.252		49.039	0.305		101.06	0.363		5.965
	56.337	0.068		3.86	41.729		7.197	0.562		6.21	0.329		2.364	0.218		9.541	0.413		8.6	0.25		8.259	2.219		24.56	0.701		26.464	0.234		8.902	0.763		15.983	0.238		0.933	0.134		16.353	145.374		33.591	0.319		63.866	0.633		4.932
	40.43	0.06		2.167	1.157		9.163	0.686		7.454	0.288		0.67	0.337		9.938	0.333		2.415	0.273		12.977	3.24		24.901	0.149		30.87	0.154		9	0.253		19.957	0.221		1.046	0.23		25.21	238.297		21.083	0.27		73.071	0.437		1.678
	85.315	0.075		4.474	42.812		9.704	0.657		13.537	0.291		1.269	0.461		10.615	0.377		20.063	0.392		19.251	2.466		11.088	0.134		22.282	0.324		11.808	0.238		19.123	0.261		0.807	0.118		5.594	20.826		35.151	0.3		76.329	0.405		10.927
	60.501	0.1		46.332	0.102		9.181	0.545		13.709	0.381		3.868	0.263		10.39	0.367		1.191	1.281		22.362	2.936		16.072	0.149		16.052	0.139		7.609	0.31		19.47	0.213		1.006	0.141		35.021	0.466		46.75	0.25		75.752	0.394		7.447
	37.596	0.115		36.022	0.175		8.403	0.45		15.764	0.334		3.719	0.244		9.135	0.477		3.043	1.167		13.916	2.384		19.977	0.275		33.611	0.177		5.426	0.239		24.025	0.199		6.545	53.808		29.397	3.352		50.132	0.308		84.633	0.421		11.413
	85.43	0.231		51.599	0.136		5.898	0.45		11.6	0.322		7.694	0.296		19.847	2.25		2.272	0.665		12.542	4.538		16.986	0.147		16.925	0.2		8.233	0.225		24.542	0.193		0.938	0.174		24.722	0.274		51.451	0.354		86.888	0.33		2.535
	32.506	0.043		50.503	0.177		9.376	0.384		25.823	0.394		2.372	0.169		7.362	0.347		2.321	0.324		19.585	2.526		10.614	0.17		29.753	0.258		3.903	0.495		20.755	0.17		1.075	0.148		26.804	0.764		36.671	0.395		76.219	0.383		5.534
	37.134	0.061		79.957	0.362		5.002	0.361		7.356	2.729		2.975	0.298		17.122	0.465		1.919	0.271		33.138	2.607		29.333	0.192		22.492	0.166		12.112	0.166		18.87	0.135		0.982	0.144		39.253	1.673		19.281	0.362		79.517	0.423		6.398
	63.624	0.071		28.06	0.127		5.854	0.396		11.14	0.279		4.466	0.281		3.928	0.376		2.822	0.276		17.094	3.503		12.456	0.304		24.379	0.14		2.602	0.396		22.675	0.127		0.719	0.199		26.225	6.454		42.55	0.269		80.494	0.408		8.387
	38.117	0.086		24.768	0.162		8.522	0.569		25.458	0.362		1.621	0.318		10.454	0.439		2.518	62.175		10.218	3.316		17.177	0.158		19.53	0.183		3.713	1.199		16.473	0.223		2.031	0.139		23.196	1.927		46.128	0.366		65.803	0.53		4.712
	47.198	0.316		88.341	0.137		4.72	0.331		7.362	0.473		1.136	0.348		13.235	0.334		4.367	0.621		15.695	4.769		12.673	0.147		21.508	0.193		2.279	0.325		21.197	0.375		1.027	0.184		33.859	0.681		42.059	0.279		65.046	0.411		5.112
	47.487	0.062		45.045	0.131		5.39	0.231		20.392	0.328		2.33	0.67		15.19	4.081		1.311	10.765		22.174	2.354		27.035	0.137		29.591	0.189		4.171	0.372		20.131	0.143		1.071	0.158		32.339	0.405		40.084	0.317		60.082	0.388		2.997
	74.73	0.172		68.895	0.127		6.363	0.281		7.032	0.339		1.516	0.478		8.627	0.379		1.224	0.674		20.599	2.851		14.557	0.136		25.336	0.1		7.458	0.16		28.429	0.175		1.613	0.179		31.935	0.599		39.544	0.566		94.673	0.495		11.375
	31.176	0.089		86.242	0.168		5.148	0.359		26.935	0.352		1.243	0.522		5.164	0.309		1.396	0.285		12.49	2.166		12.045	0.142		25.277	0.144		2.673	0.398		16.642	0.125		0.918	0.18		37.606	0.87		45.95	0.303		81.487	0.241		15.029
	81.497	0.105		74.282	0.113		3.041	0.367		7.396	0.344		1.682	0.562		14.973	0.438		1.577	0.685		13.867	7.633		13.81	0.193		6.21	0.18		4.085	0.886		21.168	0.162		0.877	0.158		11.592	93.305		35.981	0.307		86.749	0.262		27.276
	52.346	0.096		45.069	0.268		2.417	0.312		19.439	0.316		3.294	1.649		1.955	0.354		17.76	0.221		19.52	2.16		9.148	0.189		51.043	0.145		11.786	78.644		17.231	0.181		1.566	0.185		5.02	1.265		42.889	0.255		104.327	0.295		29.214
	48.239	0.104		55.603	0.214		2.186	0.395		6.592	0.47		1.257	1.272		10.192	0.481		17.502	0.257		8.915	2.463		17.729	0.133		36.504	0.188		12.63	0.207		22.286	0.194		0.926	0.119		12.111	76.991		26.868	0.753		73.946	0.353		36.232
	39.505	0.04		37.334	0.254		5.048	0.329		7.491	0.502		1.053	1.279		4.319	0.372		16.021	0.325		14.412	3.023		35.148	0.171		43.37	0.227		10.815	0.181		27.893	0.19		1.036	0.226		3.06	1.264		25.325	0.456		85.316	0.349		33.717
	39.331	0.071		19.987	34.91		2.945	2.115		26.123	0.342		1.622	1.128		11.793	0.345		17.049	0.648		11.62	8.439		23.039	0.134		19.577	0.197		3.043	0.537		24.311	0.19		1.346	0.151		13.145	127.081		36.327	0.322		67.42	0.423		31.225
	56.799	0.067		52.102	0.169		3.908	97.777		5.341	1.775		0.911	0.777		10.259	0.396		11.884	0.427		16.003	2.471		25.282	0.229		53.197	0.201		11.695	67.209		21.82	0.471		2.005	0.167		13.681	140.465		35.05	0.356		66.419	0.25		21.457
	55.758	0.032		59.943	0.165		3.53	8.194		8.569	0.329		2.912	0.994		22.913	0.403		25.669	0.361		15.94	3.474		25.861	0.229		48.12	0.209		8.855	0.145		16.265	0.106		1.23	0.174		5.323	3.045		28.61	0.339		86.776	0.309		3.037
	32.969	0.105		92.229	0.182		3.393	89.981		15.587	0.403		1.197	0.884		5.953	0.538		24.119	0.325		12.002	2.59		19.517	0.258		38.44	0.211		7.382	0.204		20.893	0.148		0.912	0.502		3.752	1.27		45.516	0.411		76.739	0.529		3.561
	30.308	0.063		56.485	0.238		9.403	0.456		8.384	0.346		0.861	1.225		8.881	0.413		12.868	0.312		12.858	2.479		22.583	0.207		66.256	0.237		7.003	0.167		19.366	0.156		0.986	0.355		11.237	59.438		45.856	0.393		80.127	0.332		8.709
	33.258	0.037		35.122	0.185		9.484	0.506		23.479	0.427		0.822	0.848		14.329	22.029		23.757	0.346		14.338	3.047		26.027	0.137		54.369	0.179		4.51	0.366		23.799	0.578		1.567	0.157		16.152	2.447		15.594	130.8		81.637	0.23		8.909
	59.46	0.079		56.529	0.173		6.313	0.419		24.456	0.439		2.889	1.483		13.826	1.111		28.256	0.464		9.888	2.806		17.298	0.17		46.938	0.215		7.075	0.148		17.706	0.264		0.978	0.458		49.81	0.918		38.253	0.324		91.121	0.403		6.543
	46.677	0.104		51.065	0.15		9.786	0.512		9.86	0.38		0.79	0.582		18.43	0.433		16.139	0.387		15.102	2.381		24.673	0.158		52.89	0.178		8.231	2.864		18.21	0.136		0.975	0.461		19.408	104.559		40.906	0.371		110.798	0.255		5.866
	76.581	0.052		56.762	0.365		5.55	0.501		26.026	0.444		0.736	3.353		10.661	0.971		16.797	0.449		6.657	2.293		21.658	0.196		29.683	0.203		4.793	0.446		22.468	0.166		1.104	0.205		6.756	1.14		28.27	0.378		98.66	0.237		5.355
	32.68	0.074		59.129	0.115		5.311	0.419		17.519	0.673		0.808	0.571		7.498	0.458		12.03	0.364		10.432	2.24		26.109	0.152		41.133	0.196		5.873	0.26		18.367	0.146		1.261	0.205		5.18	1.114		1.96	1.164		91.182	0.264		4.328
	40.604	0.068		45.495	0.152		9.244	0.546		10.285	0.51		0.986	2.211		11.633	1.173		13.915	0.299		12.713	3.369		16.324	0.151		68.169	0.211		4.328	0.194		11.217	0.258		1.032	0.224		7.767	3.329		31.404	0.427		96.18	0.384		4.766
	39.158	0.062		60.803	0.127		8.608	1.073		14.156	0.735		0.593	2.087		9.751	0.513		12.77	0.973		8.103	2.592		28.246	0.143		54.351	0.18		5.042	0.346		16.554	0.231		1.369	0.302		41.737	0.862		35.222	0.38		100.257	0.362		6.631
	64.434	0.096		43.23	0.315		6.426	0.527		11.189	3.748		0.704	1.337		13.084	0.34		19.26	0.489		14.351	2.518		18.458	0.162		69.002	0.201		3.999	0.426		7.65	0.321		0.985	0.169		18.235	106.825		36.297	0.52		100.681	0.283		12.814
	68.772	0.119		65.678	0.218		9.578	0.975		3.373	0.239		0.965	4.439		24.403	0.497		24.054	0.281		11.295	2.293		26.628	0.182		48.612	0.235		3.418	4.522		3.448	0.23		1.056	0.256		41.943	4.49		26.095	0.581		78.482	0.388		6.217
	31.349	0.129		65.104	0.265		7.197	0.835		4.301	0.308		0.846	5.688		13.818	0.479		15.682	0.256		16.299	2.79		37.346	0.133		43.526	0.209		3.733	4.442		16.309	0.118		0.959	0.192		42.235	0.747		25.077	56.262		102.115	1.436		1.922
	68.252	0.086		70.393	0.156		6.266	0.42		3.375	0.527		1.343	14.396		2.494	0.329		16.009	0.386		9.65	2.13		18.274	0.178		84.038	0.221		5.607	3.149		12.054	0.185		1.352	0.193		40.321	159.041		44.919	0.383		64.492	0.228		6.44
	46.214	0.056		64.028	0.377		5.195	0.509		10.6	0.5		1.196	1.777		12.148	0.747		21.816	0.355		6.519	2.417		55.821	0.137		36.666	0.195		5.633	3.815		18.184	0.328		1.003	0.175		32.812	95.761		11.862	105.488		87.685	0.281		4.062
	75.366	0.097		73.704	0.354		4.686	0.665		15.181	0.396		1.201	21.057		20.311	0.375		26.877	0.393		6.149	2.301		35.76	0.171		59.93	0.189		7.243	0.808		4.995	0.194		1.017	0.139		51.471	1.558		1.377	0.459		92.415	0.345		5.288
	67.673	0.154		67.862	0.122		5.076	0.495		5.545	0.352		1.881	1.174		11.528	1.363		21.357	0.492		13.286	2.574		28.339	0.165		48.788	0.185		5.056	2.283		17.668	0.326		16.451	0.544		45.35	0.671		8.472	63.983		78.788	0.292		12.058
	105.385	0.137		52.711	0.133		5.552	1.273		18.584	0.368		0.691	1.26		7.258	0.532		16.203	0.603		14.44	3.037		34.374	0.141		43.202	0.185		6.438	3.21		24.217	0.173		14.651	0.212		39.326	159.023		1.384	0.677		64.347	0.198		3.477
	38.001	0.073		90.924	0.184		9.33	0.56		4.598	0.343		0.628	2.812		9.277	0.413		25.843	0.302		15.857	2.261		23.946	0.22		49.002	0.163		13.77	2.584		19.228	0.187		14.693	0.25		57.947	0.473		14.348	68.768		66.077	0.33		5.85
	121.812	0.33		33.297	0.147		9.815	0.602		16.147	0.387		1.426	2.967		12.459	0.437		29.224	0.344		11.611	3.508		25.833	0.136		47.948	0.175		5.767	24.935		14.241	0.205		11.124	0.103		54.432	0.436		6.125	58.476		94.609	0.54		4.431
	51.304	0.074		51.677	0.108		7.139	1.683		10.18	0.521		2.106	50.661		12.711	0.415		16.436	0.468		8.077	3.064		14.739	0.336		48.617	0.231		4.385	2.269		18.113	0.208		20.292	0.166		55.144	0.588		9.601	102.003		99.336	0.275		8.894
	31.176	0.072		60.542	0.129		10.388	1.157		6.089	0.396		5.306	2.508		9.665	9.094		5.236	90.505		7.72	2.655		16.789	0.241		34.218	0.186		16.832	0.168		28.533	0.157		16.372	0.098		63.59	1.128		13.531	136.003		66.619	0.264		6.604
	185.61	0.267		57.861	0.183		10.168	0.698		12.788	1.19		1.491	9.027		10.716	0.429		23.877	0.564		11.888	3.589		27.949	0.153		31.753	0.202		3.057	1.956		17.938	0.141		21.791	0.128		54.075	0.494		5.21	51.067		88.449	0.402		6.891
	61.079	0.272		65.834	0.167		5.894	0.522		7.558	0.369		0.732	4.709		20.293	0.37		13.586	0.535		10.552	3.14		17.309	0.209		49.801	0.146		3.491	0.786		19.427	0.817		15.989	0.138		60.708	2.469		5.427	43.404		66.988	0.247		8.782
	107.467	0.895		43.507	0.134		7.808	0.504		12.019	0.477		0.668	3.631		6.775	0.365		45.117	0.472		6.397	14.291		28.832	0.159		61.697	0.229		14.494	0.121		16.401	0.175		21.416	0.155		68.196	1.176		6.009	56.277		94.254	0.824		20.505
	81.671	0.236		75.295	0.129		10.505	0.568		18.68	0.329		1.079	4.676		14.152	3.053		2.046	12.886		11.139	2.489		33.401	0.152		37.694	0.265		14.632	0.174		18.523	0.161		11.217	0.143		6.905	1.279		6.427	54.763		82.809	0.33		22.693
	92.602	3.227		57.226	0.165		15.622	0.619		15.359	0.415		2.478	90.821		5.195	0.491		1.987	9.856		11.099	3.921		29.571	0.134		56.674	0.187		22.49	0.135		22.172	0.184		23.806	0.153		54.275	0.98		5.67	57.922		74.57	0.243		8.579
	51.767	0.365		64.49	0.185		3.985	0.393		6.49	0.405		0.79	3.841		12.343	0.407		33.452	0.486		14.203	2.823		31.116	0.142		70.065	0.211		3.851	0.631		17.975	0.182		1.65	0.118		70.671	1.664		9.777	92.727		70.775	0.382		8.983
	117.474	87.055		41.527	0.222		6.677	0.628		10.42	0.347		1.699	50.013		11.192	0.409		1.93	2.171		12.795	2.495		16.748	0.193		40.14	0.416		4.334	0.606		25.423	0.177		39.492	0.22		53.877	0.588		8.47	84.981		104.517	0.273		2.833
	31.118	0.1		65.125	0.123		8.716	0.572		13.801	0.264		5.072	3.133		11.97	0.525		15.514	0.588		8.56	3.374		24.227	0.157		50.653	0.189		1.848	3.798		21.575	0.187		20.457	0.227		44.987	1.523		8.087	84.439		92.769	0.422		10.28
	52.577	0.107		86.361	0.138		7.531	0.548		8.562	0.667		1.404	42.477		15.485	0.803		47.393	0.442		13.059	3.164		30.435	0.244		37.471	0.195		3.021	0.343		25.488	0.182		4.431	0.666		54.305	4.446		8.932	89.854		83.141	0.32		12.986
	132.975	0.797		79.365	0.208		3.415	0.423		15.597	0.34		0.744	6.874		2.877	0.384		18.453	0.643		11.358	105.252		36.373	0.16		91.082	0.207		5.485	0.408		21.179	0.341		5.288	0.781		26.231	78.889		3.722	1.925		91.285	0.375		8.025
	50.321	94.851		51.704	0.136		11.133	0.722		7.859	0.291		5.69	3.109		9.648	1.831		18.599	0.708		17.421	179.974		33.004	0.13		43.54	0.175		10.239	0.28		11.79	3.792		14.297	0.137		26.852	166.721		5.871	59.395		91.625	0.276		4.995
	37.481	0.207		75.912	0.101		7.113	0.664		5.312	0.327		1.979	47.433		11.308	0.461		7.059	0.788		11.021	138.926		21.23	0.168		29.628	0.171		4.028	2.596		17.566	0.176		17.223	0.137		60.705	1.757		6.894	64.274		82.58	1.845		5.89
	105.212	0.247		68.84	0.216		12.662	0.817		12.726	0.401		0.664	0.516		14.035	1.562		36.814	0.48		21.107	183.508		42.255	0.136		30.19	0.223		18.493	0.122		18.334	0.16		23.828	0.215		59.802	0.752		8.318	83.142		86.341	0.344		8.023
	291.168	0.807		69.908	0.163		8.401	0.818		10.841	0.366		3.256	119.314		18.16	0.612		17.958	0.489		11.918	126.085		25.131	0.145		56.492	0.177		11.41	0.19		16.679	0.147		19.551	0.205		57.648	0.686		7.898	74.593		94.08	0.267		7.329
	61.889	0.564		51.132	0.133		23.301	0.499		13.751	0.276		0.552	0.429		10.176	0.423		30.854	0.513		18.095	127.419		22.885	0.172		48.833	0.226		22.22	0.134		21.879	0.155		30.895	0.166		13.505	66.278		4.17	42.271		81.243	0.29		7.378
	93.181	0.164		74.53	0.13		4.644	0.544		17.736	0.357		0.711	0.885		15.94	1.869		16.714	0.966		16.119	75.431		17.709	0.249		38.032	0.192		12.505	0.111		17.742	0.163		2.656	0.17		15.222	116.4		7.925	79.476		79.15	0.269		6.875
	193.245	0.388		59.906	0.106		17.911	0.549		14.444	0.288		2.552	0.33		18.511	2.596		28.264	0.335		22.921	114.839		23.61	0.121		60.033	0.183		14.858	0.146		22.903	0.174		16.202	0.244		10.654	60.974		8.145	79.59		83.002	0.209		5.77
	58.939	0.108		74.505	0.437		19.88	0.489		16.401	0.297		2.84	0.343		9.946	0.4		23.491	1.697		16.888	77.685		35.574	0.158		43.339	0.165		2.837	2.474		18.711	0.159		21.377	0.116		19.637	115.606		8.034	69.51		86.834	0.398		6.468
	33.085	0.248		61.915	1.598		7.469	0.482		14.285	0.282		5.013	0.33		3.745	0.35		19.493	0.588		11.101	4.632		29.14	0.173		52.863	0.215		13.25	0.151		20.3	0.125		17.004	0.151		24.317	153.782		10.182	96.98		83.236	0.328		9.609
	47.429	0.476		16.136	0.208		17.635	0.425		8.351	48.422		9.098	0.618		10.013	0.401		35.037	0.452		18.84	132.268		1.233	0.206		39.057	0.488		20.439	0.098		15.345	0.158		17.171	0.239		39.047	126.216		7.81	75.131		71.221	0.327		2.196
	32.448	0.155		42.979	0.131		13.065	0.538		8.266	55.214		13.116	0.346		11.983	0.34		48.148	0.336		21.82	152.418		1.522	0.157		52.764	0.203		17.979	0.134		19.848	0.211		16.447	0.138		13.726	83.897		9.262	1.61		107.56	0.313		7.097
	68.657	0.184		15.278	60.525		11.553	0.567		14.04	0.229		8.748	0.442		4.805	0.324		17.916	0.536		27.959	38.227		1.356	0.177		51.314	0.151		21.859	0.145		19.681	0.153		21.873	0.13		21.749	123.678		7.37	70.558		97.365	0.763		6.488
	72.3	0.494		81.562	0.126		9.369	0.386		7.815	0.298		10.446	0.362		7.457	0.446		14.119	0.448		11.591	4.287		1.548	0.167		54.731	0.24		18.914	0.114		18.481	0.132		25.749	0.14		18.983	105.265		6.873	57.959		106.182	0.278		5.303
	81.613	0.572		83.239	0.189		9.001	0.471		10.972	84.333		12.907	0.362		5.071	0.314		9.71	0.554		21.68	33.455		8.263	0.299		29.037	0.165		16.685	0.185		19.969	0.158		18.017	0.109		13.564	1.849		8.852	85.241		73.371	0.332		7.952
	161.375	0.666		48.861	0.12		16.489	0.421		10.811	49.568		14.105	0.422		4.958	0.849		23.832	0.57		14.092	17.362		1.135	0.192		50.39	0.341		17.499	0.121		17.691	0.164		23.917	0.095		21.38	67.832		8.341	74.677		71.328	0.71		7.502
	49.916	0.145		63.026	0.229		8.317	0.531		18.199	0.271		12.835	0.423		6.435	0.354		38.844	0.509		11.804	110.305		7.896	0.19		32.059	0.218		18.324	0.134		17.97	0.166		25.954	0.166		15.329	0.76		8.479	61.541		76.032	0.232		8.756
	101.973	0.119		61.601	0.14		8.317	0.448		18.295	70.44		12.897	0.303		6.38	0.487		46.745	0.579		25.46	9.891		10.988	0.35		54.094	0.188		14.884	0.438		13.659	0.21		31.687	0.126		35.019	0.847		6.814	1.475		94.391	0.344		9.526
	295.159	0.626		31.5	0.163		15.882	0.483		10.513	53.169		10.692	0.352		13.667	0.323		42.746	0.516		28.281	78.495		3.014	0.253		38.032	0.193		9.707	0.247		18.768	0.217		20.647	0.12		44.904	1.196		10.464	2.03		71.607	0.32		4.622
	47.371	0.092		61.819	0.42		18.338	0.483		14.697	81.159		12.921	0.439		6.34	1.608		39.313	0.418		17.921	36.127		1.499	0.147		41.977	0.145		14.314	0.178		18.815	0.172		3.169	0.157		17.421	0.97		5.715	52.477		101.659	0.285		9.071
	54.659	2.168		60.4	0.122		3.882	0.504		17.916	0.297		19.2	0.736		13.931	0.371		10.955	0.428		10.769	99.842		1.359	0.185		23.474	0.184		15.444	0.095		23.521	0.212		16.775	0.164		12.564	1.723		8.448	77.433		84.792	0.63		8.006
	73.168	0.117		94.616	0.43		7.873	0.535		8.685	56.594		19.477	0.542		10.763	0.481		51.105	0.494		16.429	135.955		1.068	0.178		53.211	0.185		18.109	0.419		21.78	0.185		18.992	0.106		24.252	1.024		7.214	63.804		103.205	0.293		7.034
	51.304	174.776		60.502	0.12		10.002	0.39		10.314	57.986		6.12	0.31		17.185	0.419		13.157	0.505		13.583	75.287		3.331	0.255		49.313	0.198		4.268	2.462		17.204	0.169		13.368	0.109		21.341	29.341		11.472	112.945		63.477	0.569		4.247
	52.75	0.099		64.3	0.149		20.761	0.507		13.127	3.909		18.159	0.43		5.998	0.403		9.715	0.576		6.889	47.432		1.776	0.176		59.994	0.177		16.94	0.123		16.624	0.181		23.889	0.134		8.529	1.541		8.628	81.829		73.815	0.294		4.278
	46.041	0.132		64.08	0.123		2.916	2.501		16.684	1.236		6.86	0.24		10.725	0.382		18.348	0.555		9.242	3.673		1.845	0.177		12.541	0.215		15.716	0.134		18.385	0.162		11.363	0.143		58.999	1.611		7.614	76.13		85.992	0.286		8.671
	96.42	0.157		37.669	45.549		6.325	0.505		28.317	0.338		4.202	0.283		17.412	0.4		17.841	0.589		27.778	159.854		9.554	0.193		54.815	0.17		27.108	0.127		15.202	0.217		23.929	0.125		9.731	0.864		11.043	108.665		72.408	0.531		4.348
	54.081	0.159		47.829	0.122		8.15	0.473		16.596	0.314		15.74	0.317		6.358	0.528		33.069	0.591		20.766	38.747		1.412	0.18		35.503	0.238		18.75	0.13		19.289	0.163		27.753	0.159		49.907	0.818		9.708	97.345		76.429	0.258		12.693
	237.319	0.129		25.139	0.198		10.728	0.475		12.956	67.496		5.4	0.25		5.139	0.299		16.676	0.442		9.88	52.875		1.614	0.16		32.978	0.199		13.872	0.157		7.883	1.035		40.61	0.148		52.005	1.804		11.862	100.782		103.098	1.134		8.875
	108.798	0.064		76.131	0.137		14.761	0.522		13.283	0.328		5.864	0.236		14.994	0.461		8.583	1.021		11.421	91.914		2.806	0.285		33.695	0.223		17.839	0.09		20.785	0.204		24.934	0.276		56.736	1.006		11.594	105.802		96.372	0.296		6.018
	42.223	0.099		74.053	0.092		10.273	0.548		10.312	71.471		1.464	0.204		10.362	0.323		13.516	0.924		14.943	28.626		1.423	0.247		78.307	0.198		13.414	0.142		21.294	0.188		32.719	0.151		51.66	1.42		6.932	3.769		92.715	0.284		5.079
	184.279	0.107		64.185	0.113		7.204	0.573		20.45	0.269		8.294	0.239		14.268	0.411		11.106	0.477		9.993	51.44		4.167	0.242		85.863	0.208		13.888	0.135		19.846	0.187		42.88	0.132		61.567	1.417		7.502	69.588		74.17	0.352		6.195
	62.641	0.116		67.794	0.146		4.792	0.561		10.966	50.963		6.064	0.309		6.111	17.678		27.415	0.595		20.113	37.158		3.698	0.218		30.111	0.24		3.036	9.505		24.237	0.182		18.395	0.131		87.286	1.545		9.453	90.79		102.646	0.39		9.101
	56.221	0.083		70.835	0.135		3.948	1.017		16.104	0.261		5.783	0.245		17.458	0.438		52.636	0.505		8.533	4.612		3.369	0.154		33.737	0.236		18.224	0.19		27.94	0.185		30.514	0.142		38.987	0.716		9.162	90.193		87.909	0.34		4.109
	74.845	0.128		46.905	0.199		17.017	0.482		14.146	112.21		1.487	0.22		6.423	0.407		47.652	0.613		8.608	86.948		11.163	0.235		20.447	0.205		17.486	0.113		24.563	0.168		19.329	0.15		58.838	0.833		8.476	3.423		98.749	0.235		3.711
	33.837	0.176		87.309	0.117		10.117	0.436		9.512	6.059		7.699	0.317		13.937	0.339		21.873	0.658		21.13	117.19		4.109	0.193		26.909	0.211		14.542	0.128		10.064	1.494		5.434	0.352		65.942	1.679		9.247	98.752		93.784	0.354		8.835
	106.715	0.129		81.123	0.118		19.121	0.514		12.414	0.349		2.461	0.319		31.12	0.455		22.388	0.654		32.023	196.868		4.873	0.236		26.839	0.144		16.235	0.111		14.131	0.172		2.665	0.415		49.63	0.703		7.047	61.629		83.687	0.321		6.192
	41.645	0.089		48.252	0.128		4.509	77.959		10.567	2.422		4.821	0.312		23.846	0.458		47.344	0.69		9.322	62.539		2.985	0.158		32.106	0.175		2.513	11.933		28.018	0.178		12.358	0.156		57.779	0.686		22.202	126.825		75.714	1.373		5.261
	34.762	0.116		64.573	0.1		18.326	0.596		7.565	49.808		1.97	2.46		26.214	0.385		17.979	0.646		21.033	193.208		3.789	0.194		28.872	0.185		5.431	14.615		26.001	0.173		2.499	0.262		37.703	0.967		20.957	112.757		80.715	0.298		13.427
	34.589	0.107		66.426	0.107		6.214	4.12		15.096	0.243		1.961	1.082		27.314	0.529		29.921	0.628		21.102	32.534		5.455	0.263		45.445	0.199		3.68	10.657		21.905	0.146		1.313	0.187		39.644	0.831		14.146	89.014		71.493	0.339		6.934
	155.706	0.107		14.315	0.355		4.985	0.926		11.133	2.824		1.816	0.516		4.18	0.374		12.4	0.717		8.07	42.838		8.694	0.246		16.155	0.175		2.772	6.936		17.224	0.151		2.342	0.357		44.841	0.651		19.09	126.523		96.864	0.339		6.941
	54.196	0.187		69.26	0.102		11.656	0.539		16.884	0.506		1.722	0.647		11.426	0.486		21.062	0.768		23.883	182.049		3.307	0.231		31.864	0.211		5.066	11.102		17.175	0.146		1.874	0.097		55.665	0.67		21.992	138.849		69.682	0.267		6.686
	173.463	0.208		57.524	0.174		20.131	0.478		17.306	0.214		1.562	0.555		10.282	0.34		18.743	0.852		38.69	140.253		12.589	0.28		38.101	0.222		2.267	11.996		16.246	0.192		4.672	0.121		52.912	0.571		2.911	6.207		83.077	0.35		5.763
	158.887	0.126		48.359	0.151		9.036	0.7		14.512	10.12		5.675	0.571		31.532	0.354		17.53	2.236		30.47	131.125		21.569	0.313		41.098	0.218		2.123	5.221		22.087	0.152		2.868	0.214		59.283	1.646		29.594	187		79.829	0.422		5.834
	58.245	0.116		63.201	0.133		3.532	1.522		20.544	70.48		3.196	1.078		22.141	0.463		11.164	0.675		17.977	7.973		2.657	0.268		52.38	0.184		3.889	9.432		15.376	0.181		2.165	0.131		54.731	0.661		18.66	120.769		82.85	0.356		12.128
	53.271	0.114		35.27	0.133		4.64	75.951		13.916	9.149		2.463	0.369		17.18	0.289		17.446	0.616		8.428	102.073		4.055	0.194		36.91	0.217		7.582	3.41		24.531	0.151		1.866	0.255		21.938	0.762		21.958	129.577		83.649	0.374		7.224
	58.534	0.128		62.22	0.113		9.612	0.552		18.871	0.23		4.001	0.66		5.122	0.353		9.806	0.847		9.267	40.328		2.902	0.237		40.675	0.232		3.714	3.66		15.664	0.17		7.379	0.167		17.404	1.064		7.133	1.111		88.719	0.321		6.041
	58.997	0.225		69.355	0.126		20.492	0.518		19.842	0.212		3.728	0.293		10.252	0.298		13.511	0.632		13.988	181.36		3.253	0.149		37.821	0.186		3.725	3.99		22.611	0.149		2.72	0.152		34.807	1.08		19.616	76.956		86.496	0.308		10.697
	93.759	0.163		62.078	0.484		3.875	1.831		12.579	0.312		1.065	0.295		18.991	0.387		11.187	3.18		10.678	36.172		6.139	0.244		42.06	0.232		5.504	2.739		15.382	0.147		2.662	0.523		34.311	0.679		2.206	0.716		89.16	0.306		8.845
	107.236	0.09		64.11	0.118		6.867	0.557		16.967	0.864		0.632	0.19		9.279	0.321		9.394	0.564		21.322	142.708		2.216	0.21		25.565	0.154		5.436	3.291		23.92	0.166		2.365	0.345		50.898	0.888		2.158	1.139		101.542	0.281		8.514
	51.883	0.097		28.692	0.27		18.062	0.407		6.366	1.792		2.604	38.321		13.028	0.339		13.832	1.413		12.208	53.486		6.953	0.184		36.758	0.204		6.438	0.797		19.294	0.185		2.394	0.13		48.27	0.628		12.182	74.368		65.832	0.535		6.742
	85.025	0.074		70.549	0.151		21.247	0.512		13.295	4.931		1.057	0.269		18.545	0.388		19.081	1.534		8.16	13.131		6.348	0.182		25.83	0.223		5.456	0.811		16.476	0.178		1.784	0.275		40.692	0.611		19.071	93.178		109.902	0.331		7.233
	70.507	0.162		52.002	0.119		19.33	0.505		23.153	6.813		0.845	0.303		9.437	0.295		9.551	0.767		5.991	2.388		4.752	38.433		26.01	0.2		11.291	1.498		24.666	0.17		3.978	0.216		42.561	0.598		23.732	97.253		70.868	0.515		4.048
	45.52	0.175		73.889	0.097		17.413	0.511		11.827	1.487		0.932	0.285		9.947	0.384		22.573	0.434		6.084	0.628		2.923	0.188		35.557	0.209		5.031	18.849		21.082	0.158		1.148	0.114		57.793	1.434		2.172	1.256		74.2	0.269		10.835
	87.397	0.107		57.619	0.151		18.681	0.603		19.709	0.414		1.232	9.564		28.218	0.616		4.663	0.697		15.266	0.766		6.506	0.166		38.061	0.177		8.825	0.168		18.756	0.964		1.911	0.29		10.005	1.376		16.689	66.7		84.168	0.296		8.038
	74.73	0.104		69.917	0.119		8.674	0.429		16.038	0.219		1.169	0.296		12.113	0.384		4.245	0.429		11.027	0.819		3.535	0.199		25.341	0.146		5.299	2.05		25.743	0.154		1.125	0.179		17.189	0.916		22.57	84.598		75.169	0.379		22.339
	51.42	0.168		92.273	0.119		23.822	0.477		24.611	1.264		0.806	0.306		19.891	0.315		5.378	81.686		18.81	1.009		6.481	0.275		38.664	0.19		6.494	2.846		17.975	0.207		2.565	0.146		62.686	0.595		17.585	114.424		82.447	1.145		5.336
	204.581	0.126		50.472	0.129		9.828	0.642		8.953	1.611		1.217	9.3		13.128	0.292		4.041	0.913		5.948	2.257		14.453	0.216		19.317	0.205		12.159	1.83		15.656	0.145		1.842	0.141		38.405	0.63		15.243	71.311		87.985	0.261		7.705
	82.48	0.121		39.068	0.14		11.258	0.57		22.94	0.718		1.343	9.453		10.305	0.258		3.271	1.501		15.172	0.972		12.807	0.166		9.622	0.378		5.589	0.237		15.798	0.154		1.07	0.167		14.73	1.833		2.977	3.076		87.683	0.369		6.928
	70.218	0.188		104.877	0.114		19	0.519		11.407	0.276		1.735	20.413		9.263	0.331		6.62	0.368		13.77	1.08		1.741	0.176		42.5	0.199		6.72	5.823		18.377	0.22		2.765	0.246		46.401	0.443		2.615	3.107		85.827	0.615		7.28
	30.366	0.219		52.34	0.145		14.861	0.463		17.689	0.451		2.825	62.306		11.935	0.315		3.921	0.65		15.046	1.058		5.045	0.196		33.924	0.236		4.646	2.097		19.125	0.91		1.392	0.321		58.303	0.931		37.273	82.13		72.664	0.596		5.834
	35.283	0.125		36.505	0.188		22.384	0.518		10.061	1.752		0.783	0.378		16.227	0.348		2.775	0.877		11.488	1.157		2.349	0.154		33.85	0.168		14.82	0.152		9.364	0.199		0.971	0.268		44.764	0.888		6.644	1.958		89.67	0.444		8.481
	296.663	0.099		76.097	0.187		14.213	0.497		6.15	0.514		7.061	3.266		26.846	0.478		3.224	0.484		15.285	1.03		9.901	0.164		62.126	0.209		18.825	1.035		8.096	0.201		6.553	0.178		46.805	0.722		23.597	1.733		90.42	0.376		11.112
	44.479	0.094		44.831	0.116		12.25	0.484		14.936	72.932		5.1	127.525		10.719	0.266		7.821	1.032		10.731	1.094		3.129	0.196		50.711	0.212		14.535	0.136		8.831	0.268		1.117	0.182		22.009	0.857		5.747	1.426		67.473	0.809		8.154
	45.173	0.065		73.557	0.102		20.841	0.646		11.714	0.251		2.424	54.905		10.299	0.248		8.671	0.469		8.025	0.789		3.245	0.158		30.268	0.192		9.013	1.449		4.983	0.166		1.182	0.196		49.399	0.544		4.433	11.266		84.895	0.333		8.582
	34.646	0.127		103.311	0.11		9.504	0.424		8.723	1.782		3.891	111.389		10.435	0.283		3.503	0.38		13.609	0.887		10.924	0.18		42.742	0.215		13.507	0.146		9.868	0.215		1.5	0.165		56.991	0.579		46.344	106.52		98.717	0.682		11.448
	79.762	0.098		75.403	0.132		11.707	0.398		15.716	0.182		4.901	121.494		16.197	0.427		5.589	0.82		11.871	1.013		6.762	0.162		20.797	0.166		22.064	0.17		15.615	0.169		3.467	5.605		16.505	1.168		48.25	0.779		68.238	0.36		6.538
	57.435	0.124		55.697	0.122		5.284	0.466		16.633	0.287		2.907	46.9		16.767	0.358		7.62	0.818		17.973	1.015		8.048	0.153		29.936	0.301		3.719	0.534		8.92	0.185		4.444	5.13		53.745	0.933		17.354	104.933		74.566	0.791		9.194
	149.749	0.221		99.308	0.113		15.743	0.374		5.707	0.613		0.905	4.318		9.502	0.313		13.802	0.906		13.819	1.062		3.178	0.155		28.033	0.215		21.422	0.212		7.897	0.14		1.087	0.255		39.349	0.876		13.771	85.627		86.181	0.342		18.94
	159.582	0.126		66.96	0.179		15.824	0.464		4.299	0.495		0.992	0.312		27.617	0.91		8.087	0.658		13.819	1.073		2.278	0.151		23.379	0.175		11.829	0.138		2.862	0.574		13.428	0.192		50.07	0.705		2.984	0.696		78.48	0.318		7.221
	190.989	0.088		77.746	0.106		4.483	0.563		7.258	0.829		0.697	0.402		16.691	0.295		6.785	0.802		12.439	1.115		2.786	0.196		8.33	0.206		10.259	0.259		8.328	0.19		1.319	0.165		53.165	0.588		29.469	0.397		86.555	0.459		9.488
	51.536	0.067		58.207	0.162		15.548	0.533		12.891	0.326		0.921	0.58		10.793	0.384		7.262	0.653		12.593	1.303		13.303	0.204		40.228	0.146		17.519	0.415		11.195	0.154		9.93	0.219		41.004	0.835		2.751	0.616		72.963	0.753		14.374
	139.28	0.095		102.217	0.131		16.373	0.355		3.735	0.231		1.062	0.528		13.877	0.389		17.607	0.551		13.022	0.924		3.413	0.212		39.151	0.19		16.406	0.136		14.764	0.203		10.589	0.236		38.08	1.32		33.564	0.623		84.406	0.402		12.357
	81.266	0.141		61.592	0.135		5.573	0.353		8.6	1.215		3.28	86.607		12.564	0.325		4.557	0.721		5.544	0.993		2.669	0.198		22.88	0.244		17.777	0.193		16.967	0.192		2.615	1.223		25.254	1.513		44.602	0.48		98.269	0.388		8.901
	54.659	0.095		47.635	0.148		36.172	0.549		4.144	0.267		0.851	5.437		18.671	0.357		19.378	0.404		4.196	0.853		6.975	0.148		35.33	0.301		11.407	0.152		16.618	0.15		8.556	0.22		40.163	0.754		39.383	0.56		86.443	0.562		5.579
	85.199	0.13		72.715	0.204		14.086	0.55		4.128	0.223		0.865	0.685		8.491	0.261		9.874	0.644		3.529	0.752		7.351	0.144		57.902	0.147		4.879	0.586		7.9	0.218		1.52	2.243		15.284	1.075		40.944	0.762		92.093	0.8		6.857
	57.725	0.27		62.537	0.201		15.261	1.538		20.561	0.365		4.233	113.402		19.126	0.43		8.35	0.503		5.496	1.03		8.478	0.184		31.369	0.179		17.807	0.112		3.2	1.279		16.817	0.269		40.551	0.556		23.395	0.692		61.261	0.572		7.504
	38.29	0.082		66.934	0.167		3.772	0.718		27.917	0.37		3.469	81.179		9.797	0.232		14.899	0.732		5.792	1.122		4.698	0.172		36.931	0.23		3.076	7.547		7.919	0.802		0.92	0.12		8.237	1.489		35.712	0.753		82.894	0.425		15.307
	79.878	0.109		27.207	0.161		3.562	0.564		26.177	0.348		0.919	1.67		10.618	0.316		9.943	0.583		3.416	0.99		8.253	0.161		19.257	0.235		23.669	0.121		5.436	1.393		7.2	0.232		51.854	0.735		39.991	0.622		83.821	0.512		15.862
	64.608	0.115		75.328	0.161		17.712	0.577		10.566	0.518		0.922	0.237		10.632	0.29		10.237	0.685		3.798	0.919		6.794	0.138		17.299	0.198		11.922	0.133		14.804	0.219		2.869	0.386		9.701	1.078		35.789	0.571		86.704	0.327		7.165
	73.284	0.094		47.416	0.204		15.91	1.905		5.35	0.325		0.705	0.313		14.228	0.353		16.139	0.476		4.674	1.205		12.29	0.157		36.646	0.182		18.806	0.138		6.655	0.186		23.422	0.273		37.354	0.624		32.112	0.709		90.218	0.363		8.684
	47.718	0.055		67.111	0.151		8.968	0.423		26.843	0.346		0.96	0.735		12.318	0.287		8.696	1.423		6.294	1.097		4.723	0.128		35.209	0.19		13.803	0.13		10.241	0.924		2.753	0.112		49.565	0.672		31.34	0.613		85.904	0.413		10.84
	60.096	0.209		96.772	0.089		2.939	0.913		18.472	0.33		6.706	0.558		11.21	0.33		3.253	0.633		8.568	1.135		14.7	0.18		25.568	0.215		18.751	0.116		5.153	0.244		3.526	0.129		38.814	0.71		48.376	0.776		84.593	0.815		6.079
	386.605	0.104		52.076	0.235		16.392	0.604		31.855	0.385		10.695	0.223		8.728	0.281		7.106	0.786		10.637	1.148		13.573	0.176		14.076	0.199		12.687	0.132		5.092	0.146		1.798	0.131		54.917	0.604		60.692	0.561		87.28	0.347		7.83
	177.165	0.142		77.132	0.103		2.675	0.604		16.289	0.338		13.844	0.269		4.912	0.386		5.467	0.714		9.67	1.083		4.555	0.204		9.282	0.307		13.87	0.149		16.772	0.134		21.183	0.112		41.023	0.682		30.413	0.614		71.555	0.391		12.891
	31.812	0.082		78.031	0.268		2.771	0.537		8.32	0.283		18.971	0.262		4.231	0.32		18.652	0.512		10.433	3.046		14.916	0.203		19.321	0.208		3.511	8.525		7.914	5.011		10.564	0.197		21.388	0.656		57.366	0.657		96.961	0.585		5.934
	145.411	0.069		82.121	0.143		2.052	0.371		15.416	0.381		22.699	0.361		5.839	0.892		10.782	0.794		13.355	0.937		16.909	0.181		7.763	0.212		22.335	0.14		10.378	0.167		21.5	0.113		29.09	0.764		95.892	0.448		138.419	0.689		7.427
	363.932	0.154		51.385	0.141		12.168	0.522		24.792	0.347		9.23	0.317		8.412	0.307		19.127	0.742		9.223	1.257		15.502	0.182		15.985	0.203		18.464	0.168		4.473	0.149		1.857	0.117		42.92	0.705		48.936	0.737		100.285	0.666		15.475
	92.14	0.152		47.41	0.179		1.853	0.385		23.032	0.362		17.571	0.374		9.345	0.293		5.647	0.712		7.5	0.915		15.256	0.185		21.636	0.202		6.873	1.853		5.107	7.779		16.504	0.136		16.12	1.384		56.305	1.128		95.904	0.882		4.175
	80.282	0.076		97.527	0.172		6.885	0.794		8.95	0.339		25.019	0.24		7.521	0.33		7.494	0.759		9.836	1.085		11.644	0.262		11.282	0.229		8.092	1.396		17.558	0.138		8.883	0.176		57.402	0.678		16.7	3.088		97.1	0.473		5.987
	66.69	0.089		96.831	0.105		1.968	1.278		9.242	0.252		30.586	0.298		6.956	0.306		16.636	0.816		8.643	1.166		14.637	0.177		5.944	0.245		28.522	0.293		18.317	0.165		23.545	0.187		32.37	0.764		91.206	0.357		74.165	0.389		4.082
	169.241	0.096		70.812	0.127		2.145	0.622		11.63	0.442		15.341	0.305		4.739	0.271		5.046	0.495		8.689	0.873		7.624	0.158		32.127	0.212		19.245	0.105		15.115	0.15		5.495	0.133		45.445	0.791		47.343	0.771		63.228	0.439		5.349
	119.209	0.103		82.903	0.157		9.142	0.423		44.668	0.427		31.828	0.296		12.034	0.318		27.838	0.441		15.353	1.021		9.618	0.216		19.613	0.196		16.422	0.126		11.196	0.279		1.739	0.274		42.589	0.981		33.053	0.611		86.603	0.385		8.963
	40.43	0.124		96.435	0.121		3.136	0.646		24.979	0.388		28.612	0.329		2.382	0.337		6.049	0.854		12.136	1.015		12.61	0.226		8.442	0.278		19.274	0.136		12.989	0.206		5.125	0.153		26.367	0.662		4.113	0.859		76.546	0.406		27.93
	456.129	0.127		86.767	0.147		10.96	1.034		28.332	0.363		26.612	0.231		2.704	0.408		21.612	0.499		13.692	1.073		7.638	0.169		14.984	0.366		20.184	0.123		29.629	132.094		5.297	0.148		39.051	0.614		4.873	1.337		62.422	0.703		6.52
	129.273	1.624		81.671	0.21		7.327	0.448		31.527	0.385		18.104	0.251		14.036	0.225		14.194	0.563		13.18	0.99		12.296	0.176		21.018	0.295		19.404	0.129		11.152	12.592		2.003	0.181		30.65	0.786		11.094	112.485		88.24	0.498		8.689
	383.077	0.111		98.734	0.128		2.933	0.518		18.221	0.33		11.783	0.297		4.336	0.323		6.263	1.4		9.211	1.007		12.838	0.176		30.31	0.221		23.825	0.171		39.957	147.051		2.531	0.119		19.59	0.691		8.278	72.172		71.283	0.894		8.449
	60.964	0.083		77.194	0.11		8.148	0.407		9.058	0.312		18.348	0.382		3.227	0.291		5.708	0.57		10.265	1.316		8.125	0.147		14.88	0.245		15.481	0.181		17.737	0.154		5.004	0.124		32.468	0.7		17.049	69.162		81.563	0.445		6.035
	30.713	0.121		76.896	0.17		5.629	0.763		25.729	0.345		31.396	0.301		1.649	0.257		9.773	0.763		14.461	1.25		8.629	0.183		9.001	0.48		17.241	0.133		5.396	8.136		15.811	0.258		36.171	0.818		23.485	69.578		77.517	0.84		6.868
	76.291	0.105		61.967	0.133		12.613	1.395		27.068	0.356		39.801	0.336		6.478	0.299		16.021	0.466		8.022	3.768		22.083	0.247		21.78	0.26		15.625	0.118		10.665	8.039		3.173	0.125		60.439	0.828		25.845	72.591		83.136	0.619		8.383
	207.82	0.102		61.825	0.137		8.003	0.831		17.757	0.303		16.152	0.454		2.51	0.329		21.371	0.601		17.613	1.102		16.879	0.185		11.067	0.234		13.537	0.137		31.266	8.641		2.908	0.202		86.058	0.751		7.251	70.939		66.42	0.474		12.26
	63.798	0.092		38.656	35.242		18.907	1.422		34.722	0.431		34.172	0.417		5.428	0.311		10.92	0.542		17.099	0.946		28.672	0.223		17.68	1.93		15.749	0.119		24.217	0.16		3.065	0.117		32.013	1.085		5.949	49.508		71.265	0.421		15.636
	97.403	0.148		76.544	0.107		4.666	0.543		7.703	0.256		14.248	0.283		18.342	0.367		20.658	0.428		14.468	0.989		51.344	0.234		17.815	0.314		16.151	0.13		24.396	0.166		18.205	0.9		24.564	1.393		9.713	90.833		79.112	0.469		6.22
	204.176	0.54		79.532	0.113		2.963	0.545		7.612	0.376		25.609	0.314		2.978	0.409		13.262	0.683		14.003	1.014		27.041	0.224		11.162	1.146		10.167	0.137		4.38	6.737		7.927	0.878		25.144	1.084		11.199	105.396		79.504	0.517		9.624
	67.211	0.109		100.809	0.106		4.416	0.712		24.883	0.379		16.869	0.167		4.388	0.332		11.706	0.489		12.951	1.055		31.097	0.162		9.643	0.238		19.918	0.164		27.098	0.163		5.178	0.122		26.447	0.614		13.068	124.708		51.461	0.358		18.644
	86.934	0.124		65.337	0.133		2.727	0.528		18.109	0.389		16.897	0.237		7.033	0.286		17.361	0.528		12.979	1.036		14.43	0.202		19.763	0.293		17.621	0.122		11.709	1.429		4.73	0.138		30.982	1.379		9.305	86.564		72.88	1.301		12.458
	38.637	0.141		121.665	0.108		11.709	0.892		28.206	0.379		28.96	0.342		2.802	0.33		21.255	0.395		18.806	0.996		26.243	0.174		19.201	0.253		13.975	0.13		11.418	3.513		17.296	0.444		83.057	2.092		10.484	99.572		62.171	0.73		9.442
	42.166	0.285		86.851	0.134		3.02	0.631		57.053	0.483		6.096	0.345		2.994	0.319		6.369	0.459		13.878	1.057		32.463	0.197		14.013	0.66		19.764	0.132		13.155	2.352		3.611	0.126		17.247	107.425		5.952	12.175		80.25	0.428		10.321
	55.411	0.098		80.912	0.118		9.975	0.79		14.765	0.359		19.475	0.314		3.826	0.32		14.303	0.472		20.453	1.196		29.462	0.193		23.699	0.53		20.656	0.129		23.971	5.945		18.785	0.365		28.101	1.971		1.429	0.607		87.691	0.425		6.038
	102.609	0.126		82.565	0.145		3.066	0.549		15.763	0.357		5.272	2.909		3.859	0.458		6.911	0.508		14.016	1.141		22.016	0.227		10.753	0.322		18.088	0.104		5.119	5.617		3.815	0.117		43.721	1.785		10.07	78.791		46.789	0.51		6.628
	305.397	0.141		20.498	32.124		2.121	0.449		16.124	0.441		11.143	0.516		4.003	0.353		22.467	0.506		12.755	1.189		27.965	0.18		15.043	0.189		17.356	0.124		2.973	3.45		4.721	0.235		30.214	3.33		1.214	0.204		106.642	0.417		7.006
	70.739	0.145		60.642	0.157		2.629	0.546		10.609	0.35		6.211	0.298		2.75	0.438		6.648	0.527		15.38	1.281		33.66	0.252		41.541	0.253		15.001	0.122		22.058	0.139		3.867	0.118		71.764	1.561		23.721	0.399		61.891	0.615		5.982
	31.234	0.072		88.232	0.139		3.421	0.719		15.316	0.4		6.752	0.291		5	0.258		7.053	0.567		20.74	1.127		13.271	0.193		6.128	0.51		3.758	0.105		20.385	0.17		3.591	0.142		15.553	0.897		15.155	0.259		101.283	0.427		6.109
	36.96	0.15		63.323	0.154		3.514	0.638		31.355	0.375		2.318	0.281		14.295	0.32		8.393	0.718		19.852	1.031		30.204	0.294		15.101	0.235		5.194	0.112		9.317	3.55		10.721	0.225		52.711	0.916		28.803	1.86		84.697	0.557		3.793
	57.783	0.092		1.002	0.196		8.425	0.929		22.495	0.354		8.816	0.273		5.128	0.303		17.069	0.843		11.992	1.207		47.343	0.221		46.916	0.2		6.35	0.12		17.679	2.862		1.269	0.105		64.873	1.01		1.538	2.185		84.794	0.509		5.315
	532.305	0.661		14.74	134.259		5.005	0.79		22.697	0.332		13.005	0.34		2.575	0.687		18.543	0.588		12.201	1.211		23.609	0.197		55.026	0.249		11.386	0.164		20.138	57.15		6.541	0.183		62.502	1.06		28.038	0.669		72.949	0.392		7.862
	87.57	0.129		2.71	0.296		3.344	0.788		18.2	0.398		7.221	0.335		4.526	0.37		4.832	73.806		14.535	1.029		25.463	0.194		17.477	0.292		5.542	0.128		21.178	52.612		15.16	0.224		30.525	1.227		21.115	0.651		81.063	0.506		4.175
	211.754	0.163		2.341	0.57		6.805	0.64		15.281	0.443		3.75	0.263		3.023	0.325		5.413	1.131		12.521	1.088		26.261	0.19		41.685	0.196		8.071	0.164		15.95	0.143		1.21	0.138		19.318	2.264		35.286	0.683		70.757	0.458		1.16
	73.052	0.11		3.375	28.241		6.718	1.781		27.529	0.277		6.498	0.358		9.082	1.751		10.636	0.638		17.843	1.148		14.367	1.333		14.902	0.153		9.415	0.124		11.639	6.647		15.989	0.161		40.724	2.104		32.428	0.49		86.343	0.466		5.719
	94.453	0.088		34.835	146.826		2.667	0.678		32.832	0.304		7.732	0.329		3.61	0.351		4.221	0.732		10.828	0.96		36.768	0.208		3.741	0.954		13.827	0.137		12.047	2.688		24.612	0.121		68.366	4.354		29.874	0.598		110.954	0.366		5.288
	89.248	0.201		9.073	78.979		3.268	0.559		25.903	0.34		6.951	0.222		1.897	0.492		9.155	0.975		19.227	1.058		20.972	0.195		21.538	0.115		6.146	0.258		6.643	9.156		3.293	0.145		18.196	125.53		20.121	0.719		76.962	0.441		4.691
	64.376	0.087		13.512	107.764		3.538	0.666		13.024	0.363		9.065	0.264		4.375	0.378		28.898	0.521		21.849	1.279		23.007	0.218		8.633	3.291		9.283	0.566		24.407	0.161		19.99	0.133		13.528	2.367		6.18	61.307		66.889	0.482		4.506
	59.807	0.075		11.467	95.63		2.838	0.641		31.698	0.342		11.008	0.342		5.675	0.37		30.774	0.6		24.455	1.394		24.168	0.158		3.082	0.172		9.302	0.164		7.565	12.892		4.417	0.102		49.186	0.855		30.916	0.582		75.037	0.53		4.972
	439.182	0.132		13.117	109.031		2.758	0.594		21.735	0.357		13.414	0.281		8.834	0.327		11.924	0.876		20.86	1.231		48.213	0.173		18.625	1.786		20.795	0.194		5.445	6.411		7.109	0.178		35.069	5.757		36.432	0.445		89.999	0.366		6.569
	58.13	0.153		18.989	161.536		3.966	0.632		10.312	0.631		18.004	0.29		5.148	0.291		13.213	0.56		15.878	1.097		30.889	0.194		9.897	0.94		8.969	0.216		22.55	52.333		5.877	0.102		46.569	1.226		31.65	0.772		77.22	0.326		8.866
	61.311	25.109		8.413	61.48		2.955	0.584		22.672	0.37		12.42	0.299		6.219	0.927		31.07	0.422		19.14	1.012		38.163	0.217		15.72	1.385		15.966	0.249		12.911	2.707		7.558	0.134		38.677	2.045		32.016	0.661		92.932	0.347		5.68
	148.592	0.774		16.088	139.28		5.136	0.839		24.911	0.3		15.415	0.296		2.473	0.322		38.49	0.432		15.288	1.062		19.178	0.205		8.999	0.803		7.739	0.421		14.697	0.164		18.825	0.217		52.72	0.172		30.865	0.447		75.653	0.32		6.154
	58.997	4.622		17.307	148.312		3.778	0.609		21.619	0.326		14.578	0.297		5.673	0.579		33.695	0.488		17.124	1.17		16.712	0.163		9.762	1.064		20.918	0.182		7.967	13.023		26.058	0.126		67.686	0.188		1.008	0.471		81.579	0.525		7.549
	67.095	0.177		9.966	79.882		2.136	0.611		13.604	0.437		15.37	0.321		10.858	0.317		17.12	0.493		15.15	1.016		17.768	0.149		20.158	0.205		7.396	0.161		20.197	44.195		5.083	0.105		46.747	0.206		35.86	0.881		88.062	0.305
	184.569	0.128		16.708	146.579		4.042	0.778		26.491	0.365		20.731	0.344		6.234	0.325		5.751	3.016		16.607	1.274		22.683	0.206		23.813	0.104		8.468	0.692		13.845	0.153		5.126	0.12		45.125	0.274		34.404	0.306		90.471	0.405
	58.708	0.228		6.625	36.723		5.618	0.656		43.042	0.497		7.019	0.379		5.943	4.829		15.715	0.691		17.965	1.026		26.889	0.183		21.216	0.132		6.554	0.157		4.248	12.111		6.067	0.116		48.482	0.212		35.269	0.8		83.489	0.352
	61.195	0.938		15.151	126.174		7.267	0.763		15.233	0.368		10.654	0.336		4.299	0.313		15.837	0.547		19.749	1.202		36.072	0.174		12.448	0.219		12.426	0.312		4.15	11.429		5.724	0.119		44.207	0.197		37.186	0.535		81.016	0.428
	125.629	63.547		8.529	58.903		5.509	0.696		18.259	0.308		8.67	0.28		2.327	0.315		14.567	0.488		20.441	1.06		30.893	0.2		27.809	0.137		6.214	0.201		15.495	0.27		6.807	0.119		54.77	0.26		9.567	2.628		53.802	1.297
	58.534	9.589		11.31	84.524		2.798	0.619		7.348	0.316		13.517	0.313		9.256	0.35		5.887	3.69		17.962	1.173		22.534	0.194		24.281	0.163		7.537	0.881		13.61	52.876		9.336	0.113		46.547	0.188		27.146	0.353		11.361	84.754
	40.662	0.358		9.901	73.748		3.935	0.656		11.208	0.443		22.758	0.31		8.323	0.319		33.211	0.475		19.233	1.194		48.599	0.149		23.565	0.186		8.129	0.208		9.832	1.268		6.415	0.168		32.901	0.274		12.232	45.451		57.902	0.98
	95.668	0.174		9.46	73.981		3.47	0.757		15.819	0.295		4.651	0.238		2.582	0.268		46.862	0.46		11.043	0.939		32.977	0.195		16.631	1.343		14.088	0.15		16.289	0.152		6.479	0.157		43.632	0.182		36.761	0.384		14.238	105.649
	94.164	0.098		17.836	162.081		3.035	0.784		16.854	0.323		12.372	0.309		7.807	0.45		15.112	0.518		18.775	1.177		37.486	0.164		33.588	0.158		19.498	0.155		22.379	31.461		6.694	0.107		49.842	1.382		7.495	74.858		12.292	101.033
	36.555	0.152		8.6	62.497		3.731	0.524		12.131	0.358		13.868	0.374		0.955	0.294		24.483	0.472		25.207	1.063		28.106	0.181		20.809	0.188		8.097	1.433		15.259	37.133		7.025	0.145		39.735	0.201		48.382	0.668		46.998	0.875
	37.134	5.773		8.681	66.113		10.486	0.892		12.212	0.459		17.54	0.275		3.885	0.468		18.015	0.752		21.984	1.09		32.417	0.189		15.076	0.16		16.949	0.142		3.963	4.82		8.523	0.145		34.98	0.206		41.314	0.33		9.79	68.861
	75.019	0.155		20.253	186.18		2.433	0.533		13.086	0.321		21.994	0.371		3.056	0.287		8.832	1.067		20.317	1.333		24.405	0.196		23.08	0.111		8.915	0.093		15.624	62.117		6.173	0.156		44.243	0.253		42.047	0.433		53.773	0.852
	32.275	0.278		15.658	139.128		3.259	0.549		14.467	0.516		6.238	0.373		3.978	0.437		25.577	0.278		26.114	1.115		36.006	0.2		24.006	0.472		17.451	0.153		4.419	5.018		5.983	0.137		33.085	0.215		34.288	0.341		51.916	0.58
	38.232	15.132		13.276	89.605		33.775	0.575		11.252	0.405		9.165	0.258		6.492	0.448		3.439	0.446		26.177	1.184		29.499	0.184		25.46	0.166		10.795	0.15		14.941	38.315		10.186	0.079		33.468	0.261		35.155	0.492		20.101	31.425
	58.187	0.073		8.959	66.563		8.551	0.709		9.709	0.393		19.341	0.306		1.084	0.281		4.784	0.518		19.472	1.042		30.921	0.223		24.661	0.195		5.094	0.271		24.641	34.067		6.92	0.144		45.356	0.232		38.95	0.743		48.203	4.153
	181.098	0.165		5.134	26.824		3.695	0.644		8.727	2.866		22.359	0.343		3.242	0.233		3.657	0.449		17.989	1.185		22.035	0.177		17.063	0.179		10.564	0.16		22.449	0.563		3.943	0.145		31.254	0.299		38.856	0.39		52.275	8.242
	52.635	0.338		21.744	178.682		3.329	0.695		5.86	0.388		11.651	0.306		1.986	0.188		4.172	0.462		18.486	1.164		32.787	0.186		11.006	0.24		10.201	0.136		14.928	47.142		7.121	0.131		36.097	0.179		44.825	0.473		53.339	0.822
	42.86	0.121		14.35	118.141		3.55	0.731		17.336	0.426		25.495	0.334		4.004	1.888		3.344	0.494		14.622	0.965		32.184	0.186		18.988	0.183		7.862	0.201		21.732	0.146		7.759	0.139		13.038	0.334		37.982	0.373		65.161	1.423
	53.155	15.656		3.685	23.581		9.253	0.712		7.782	2.313		10.78	0.302		2.062	0.91		4.615	0.594		20.266	1.123		29.094	0.216		13.015	0.214		4.151	0.168		7.195	0.14		5.142	0.084		59.788	0.256		34.516	0.416		56.557	1.05
	72.3	0.854		10.667	87.755		7.832	0.682		19.673	0.436		19.092	0.288		3.858	0.289		3.616	0.434		15.29	1.378		27.818	0.165		17.746	0.117		2.445	0.206		16.085	0.18		5.223	0.142		45.632	0.25		32.417	0.597		13.058	108.981
	64.029	0.19		13.929	104.682		8.383	0.679		7.46	0.717		8.072	0.373		3.672	0.866		3.304	0.404		13.521	0.924		12.368	0.168		13.148	0.209		5.573	0.182		3.627	3.853		5.897	0.144		12.618	0.289		35.997	0.42		60.322	0.311
	64.203	0.141		15.396	137.817		3.325	0.595		18.783	0.454		18.429	0.375		3.775	0.564		3.92	0.475		16.854	1.068		19.89	0.18		17.93	0.232		7.578	0.133		23.518	0.172		3.512	0.134		34.857	0.237		20.798	0.575		13.5	120.154
	61.774	0.056		6.451	44.096		2.993	0.607		13.054	0.261		19.314	0.312		1.835	0.439		3.937	0.488		9.691	1.595		36.332	0.182		11.495	0.164		3.156	0.142		18.024	55.583		5.534	0.173		41.739	0.26		32.441	0.412		51.657	1.806
	58.187	0.057		16.272	143.593		8.812	1.819		5.693	0.29		19.765	0.334		2.328	0.546		4.765	0.456		24.262	1.046		23.941	0.15		8.053	0.224		9.511	0.154		21.024	41.389		4.887	0.161		48.078	0.249		27.331	0.453		40.792	0.203
	176.992	0.07		79.163	0.161		10.826	0.601		8.934	0.582		11.845	0.278		7.627	160.142		7.289	0.462		20.969	0.96		25.094	0.195		9.952	0.313		7.64	0.112		20.067	17.713		6.253	0.12		27.559	0.214		38.316	0.47		53.286	0.268
	94.222	0.072		49.09	0.129		8.596	0.746		8.434	0.489		7.228	0.298		1.525	0.299		1.176	5.796		19.35	1.14		21.614	0.2		10.26	0.168		4.135	0.693		11.871	0.173		3.504	0.173		62.787	0.228		38.484	0.346		81.461	7.51
	147.377	0.073		14.282	0.167		3.061	0.674		10.615	0.338		16.851	0.28		1.54	0.271		3.802	0.324		20.267	1.182		22.371	0.161		8.95	0.182		6.471	0.33		11.578	0.14		2.959	0.755		40.952	0.314		37.876	0.392		52.202	0.287
	61.774	0.094		25.72	0.113		4.031	0.607		16.796	0.544		17.137	0.351		7.965	189.556		2.959	0.517		16.489	1.086		20.456	0.208		25.398	0.302		32.406	0.146		8.639	0.175		2.36	0.144		31.514	0.236		40.681	0.432		76.09	9.06
	80.109	0.107		46.651	0.295		5.422	1.262		14.216	0.444		16.961	0.328		7.356	176.932		5.818	0.27		21.176	1.065		23.42	0.229		23.429	0.177		3.894	0.237		13.73	0.137		1.021	0.164		57.464	0.234		35.027	0.476		44.591	0.24
	314.073	0.067		51.919	0.119		10.57	0.547		11.295	1.755		12.6	0.351		2.429	0.335		1.241	4.091		18.525	0.893		35.547	0.395		17.378	0.229		23.547	0.179		14.941	43.181		0.874	0.095		46.646	0.245		38.201	0.336		42.985	0.214
	100.353	0.074		81.787	0.163		4.421	0.854		7.911	0.449		10.385	0.352		1.759	0.404		4.635	0.67		14.714	1.463		33.919	0.241		15.24	0.213		19.871	0.159		14.635	16.927		0.519	0.123		22.192	0.195		32.052	0.386		33.625	0.344
	94.627	0.05		78.017	0.152		6.791	1.18		7.703	0.392		14.804	0.26		5.043	0.362		1.403	3.745		19.305	1.187		20.271	0.169		19.44	0.16		5.129	0.637		18.857	41.687		0.755	0.241		42.986	0.209		40.474	0.363		65.538	0.266
	65.244	0.077		78.21	0.176		4.684	0.608		7.113	2.669		27.206	0.32		1.018	0.983		13.455	0.469		16.97	1.028		33.471	0.239		10.095	0.2		10.591	2.13		21.98	66.363		2.152	0.108		47.753	0.192		33.953	0.408		61.631	0.308
	105.617	0.089		61.737	0.171		3.795	0.532		7.088	4.564		19.273	0.336		4.082	81.372		8.162	1.208		24.364	1.162		24.21	0.151		27.029	0.126		23.148	0.173		19.131	0.165		0.825	0.237		76.607	0.413		39.823	0.427		59.233	0.188
	74.498	0.07		86.381	0.209		7.638	0.817		11.686	0.215		11.44	0.283		3.105	2.602		8.616	0.431		20.28	0.955		13.137	0.18		25.37	0.198		6.143	2.167		10.458	0.152		1.246	0.105		21.548	0.192		32.955	0.99		49.811	0.22
	42.571	0.079		92.119	0.155		5.781	0.644		5.853	0.269		4.812	0.273		1.162	0.961		1.417	6.691		21.213	22.47		30.088	0.213		15.563	0.134		20.176	0.336		10.448	0.205		1.26	0.114		44.641	0.261		43.036	0.403		59.956	0.187
	77.737	0.087		70.72	0.152		71.375	0.533		4.768	0.295		18.423	0.319		2.132	0.304		7.36	0.363		22.792	28.623		19.709	0.598		5.216	0.156		7.123	3.148		7.699	0.24		0.744	0.324		35.789	0.256		31.273	0.321		81.951	7.8
	246.573	0.076		53.17	0.132		6.866	0.643		6.033	0.439		15.029	0.327		2.755	0.605		2.877	1.349		16.864	31.83		42.927	0.388		19.552	0.133		10.057	5.806		12.519	0.148		1.284	0.098		37.211	0.256		42.429	0.373		36.972	0.163
	83.29	0.087		78.747	0.252		5.237	0.728		4.519	0.472		7.77	0.324		3.22	0.253		1.114	1.286		11.24	5.117		34.869	0.519		16.278	0.166		22.786	0.175		9.877	0.183		0.932	0.203		57.029	0.245		38.081	0.38		57.535	11.522
	102.146	0.051		102.575	0.199		5.29	0.888		3.61	0.301		9.47	0.225		3.618	0.305		10.946	0.406		4.162	1.389		11.456	0.294		16.326	0.157		30.272	0.145		13.258	1.022		1.607	0.356		46.2	0.962		30.449	0.429		59.857	0.21
	46.561	0.097		84.708	0.138		6.93	1.591		14.007	0.491		14.903	0.335		2.989	0.416		1.49	3.074		30.166	2.2		23.752	0.666		21.755	0.131		7.811	1.986		9.531	0.184		0.871	0.105		30.88	0.256		32.871	0.514		8.959	67.357
	65.186	0.093		85.455	0.152		10.247	0.868		5.252	0.322		16.701	0.373		2.569	0.455		1.307	0.922		19.91	36.767		19.653	0.454		14.633	0.179		7.656	0.501		17.566	63.579		1.9	0.491		37.912	0.223		44.411	0.403		51.063	0.161
	87.917	0.076		84.266	0.14		4.665	0.766		7.24	0.527		14.356	0.279		2.4	0.311		1.233	6.032		18.622	32.919		35.902	0.804		6.418	0.2		7.505	0.866		9.814	0.196		1.003	0.096		38.574	0.347		29.97	0.554		60.603	17.152
	63.509	0.093		49.726	0.183		82.1	0.533		5.456	0.525		7.957	0.319		7.405	180.403		1.138	0.684		28.769	1.733		51.856	0.18		11.329	0.181		12.013	4.611		12.455	0.144		0.769	0.064		47.981	0.305		37.687	0.429		88.386	12.177
	75.944	0.094		28.108	0.2		7.401	1.144		4.945	0.457		6.284	0.29		2.402	0.218		2.175	2.386		7.355	54.473		30.61	0.283		13.716	0.161		19.272	0.173		10.723	0.241		0.915	0.097		65.082	0.281		47.555	0.493		36.672	1.609
	87.86	0.067		101.325	0.181		6.572	0.608		6.069	0.381		21.319	0.344		2.062	0.239		1.128	0.302		9.051	30.829		32.428	0.914		20.877	0.189		15.097	0.225		20.832	1.109		0.89	0.098		23.998	0.376		46.593	0.447		61.891	0.211
	59.576	0.047		1.464	0.326		4.288	1.193		5.1	0.436		7.257	0.268		2.94	0.304		1.038	1.548		17.846	32.534		38.092	0.49		14.174	0.147		5.022	0.376		5.316	2.74		0.957	0.081		20.524	0.322		31.89	0.478		46.216	0.241
	133.496	0.091		72.133	0.133		16.424	0.625		14.681	0.47		3.264	1.428		1.834	0.29		3.426	0.338		21.783	44.358		24.62	0.798		11.936	0.153		12.013	1.858		8.336	4.16		1.108	0.305		41.162	0.277		40.441	1.059		13.169	103.15
	80.919	0.084		94.559	0.153		6.89	2.088		2.962	0.409		3.687	1.5		0.889	0.852		2.088	0.782		28.047	2.708		21.867	0.555		9.499	0.138		25.494	0.159		2.072	0.124		0.865	0.099		13.991	71.084		36.467	0.881		53.251	0.39
	64.839	0.08		98.78	0.183		68.696	0.601		17.002	0.483		5.39	0.425		2.956	49.327		1.258	0.933		15.942	15.735		21.651	0.466		8.486	0.211		27.031	0.276		5.995	2.279		0.892	0.098		43.888	0.256		36.638	0.386		34.967	0.22
	100.006	0.065		72.375	0.167		59.213	0.4		7.75	0.49		1.561	0.925		3.895	70.042		1.077	0.366		44.367	3.036		29.274	1.328		5.026	0.165		28.322	0.179		14.552	0.151		1.236	0.089		31.413	0.2		31.873	0.368		39.832	0.254
	31.292	0.05		118.791	0.196		77.826	0.773		15.057	0.454		3.351	1.418		1.655	0.227		1.865	1.04		35.235	1.772		17.223	0.207		9.568	0.225		8.279	0.146		10.194	0.272		0.91	0.117		52.228	0.22		20.547	0.547		42.673	0.251
	63.624	0.077		68.456	0.121		70.046	0.508		7.946	0.537		1.68	1.089		2.799	0.306		1.161	0.383		20.442	2.051		15.461	0.143		5.485	0.151		5.031	0.203		5.109	2.628		1.019	0.065		18.814	0.278		33.813	0.508		39.908	0.176
	39.042	0.108		88.551	0.132		51.058	0.449		8.374	0.593		9.25	0.947		4.626	100.724		3.252	0.555		14.66	31.585		32.619	0.167		7.759	0.174		16.949	2.858		4.831	1.849		0.829	0.075		53.73	2.02		14.111	102.205		57.65	2.328
	199.781	0.082		63.691	0.123		62.17	0.431		17.153	0.421		4.782	1.682		1.199	4.662		2.629	23.316		42.217	1.97		37.686	0.855		6.747	0.17		4.051	0.168		3.875	1.716		0.826	0.07		61.148	0.235		17.235	125.383		59.389	0.953
	135.115	0.079		10.741	0.178		60.161	0.507		5.68	0.49		4.475	0.894		1.761	2.178		2.354	17.81		14.196	74.799		28.965	0.157		11.956	0.114		11.391	1.871		8.869	0.119		0.837	0.098		32.798	0.249		14.891	111.78		50.998	0.176
	57.898	0.084		56.94	0.167		82.529	0.47		4.123	0.48		19.988	0.35		4.181	98.861		2.967	23.346		9.725	61.835		35.191	0.848		14.043	0.133		5.657	0.499		3.369	1.9		1.013	0.092		52.865	0.272		5.692	14.279		85.164	11.741
	81.671	0.084		65.124	0.159		70.392	0.494		4.373	0.53		17.165	0.355		2.215	0.276		1.45	3.26		23.895	53.627		17.679	2.207		4.07	0.156		19.731	0.156		5.419	0.175		0.719	0.098		37.028	0.225		33.7	130.873		76.027	0.32
	51.536	0.108		15.91	0.157		74.124	0.526		8.159	0.466		11.727	0.786		2.228	0.247		1.569	1.04		20.907	74.418		21.501	0.196		14.533	0.127		32.025	0.251		10.496	0.142		0.732	0.056		24.444	0.163		26.424	112.058		55.941	0.194
	98.444	0.094		39.182	0.194		53.384	0.759		9.144	0.428		3.943	0.68		7.137	153.374		1.324	3.154		40.509	1.848		20.115	0.219		3.288	1.137		11.881	1.088		3.717	2.002		0.856	0.097		42.592	0.218		19.056	125.135		41.899	0.171
	151.484	0.098		36.311	0.127		58.515	0.462		7.083	0.428		20.945	0.537		5.44	105.131		3.38	17.254		39.482	2.715		32.74	0.269		2.787	0.162		13.84	0.679		4.598	0.384		0.681	0.077		25.982	0.268		2.381	0.576		37.967	0.225
	36.902	0.08		18.946	0.345		54.84	3.383		4.922	0.549		1.645	5.709		1.715	0.222		7.2	0.444		17.6	3.726		26.895	0.18		4.211	0.676		31.462	0.248		5.091	0.173		0.625	0.079		59.813	0.218		2.581	0.507		63.585	1.006
	61.542	0.077		34.414	0.125		63.488	3.907		7.092	0.485		6.929	0.499		1.234	3.722		5.014	0.542		43.332	1.897		4.19	0.2		13.442	0.124		11.094	0.199		7.58	0.155		1.328	0.12		60.203	0.215		5.44	0.861		52.573	0.528
	105.154	0.061		23.391	0.135		67.738	0.572		4.051	0.421		15.042	0.543		1.975	31.827		7.834	0.476		29.005	7.279		8.248	0.347		7.091	1.693		17.808	2.55		10.335	0.134		1.227	0.662		62.246	0.289		12.729	0.621		10.861	86.834
	398.52	0.092		28.515	0.123		65.696	0.453		4.924	0.743		23.014	0.39		2.47	0.255		1.118	2.93		28.535	2.401		28.55	0.193		21.196	0.347		7.553	0.226		8.238	0.124		3.782	0.297		60.216	0.193		17.924	114.059		50.834	0.362
	150.443	0.081		51.29	0.218		63.168	0.509		3.609	0.466		1.731	3.643		1.303	0.246		5.653	0.558		32.989	1.943		42.646	0.182		6.071	0.337		13.198	3.159		6.686	0.493		2.11	0.173		51.014	1.083		11.955	0.642		51.793	1.693
	126.96	0.074		29.599	0.234		81.2	0.477		12.803	0.646		4.156	0.698		0.825	0.581		2.873	0.631		33.109	2.045		12.884	3.323		2.489	0.157		5.056	0.681		13.557	0.177		1.497	0.148		40.7	159.769		47.74	0.847		36.682	1.517
	79.878	0.088		13.999	0.178		89.319	2.327		10.841	0.442		3.581	0.64		3.866	0.308		7.558	0.895		27.544	2.275		46.64	0.207		5.907	0.205		27.309	0.221		5.985	0.792		10.377	0.197		41.127	0.251		10.263	60.66		80.351	0.212
	79.357	0.081		25.905	0.149		62.303	0.825		3.941	0.517		19.674	0.513		1.96	0.266		3.185	47.608		16.925	1.421		18.444	0.205		8.5	0.366		4.94	1.051		6.298	0.756		1.025	0.166		59.967	0.186		23.517	126.234		39.369	0.279
	110.475	0.083		18.774	0.183		65.803	0.519		3.045	0.51		15.023	0.47		2.858	0.249		7.007	0.983		35.139	1.967		8.422	0.18		7.045	0.171		5.616	0.48		9.5	0.859		1.289	1.672		12.129	70.156		62.761	0.554		46.452	0.498
	98.502	0.113		19.111	0.135		64.568	0.467		14.575	0.35		13.29	0.618		1.654	0.26		5.974	0.493		27.801	1.977		39.84	0.185		6.297	0.216		4.438	0.973		14.469	5.636		1.272	0.14		45.746	0.28		29.684	0.413		62.681	0.179
	62.525	0.095		13.21	0.182		59.054	0.462		2.746	0.518		3.886	0.393		4.743	0.271		5.367	0.504		30.072	1.647		59.38	0.201		3.383	0.168		12.579	0.307		9.296	0.763		1.274	0.11		26.939	0.671		30.365	0.798		48.891	0.329
	77.911	0.076		34.676	0.093		78.378	0.52		14.944	0.519		15.355	0.4		5.202	0.267		6.757	0.47		13.712	1.312		34.462	0.221		21.58	0.213		5.2	0.203		11.994	0.955		11.691	0.192		64.277	0.777		40.044	0.485		43.448	3.377
	92.834	0.098		43.336	0.229		70.281	0.905		13.078	0.415		24.83	0.514		2.583	0.356		5.419	78.894		49.702	1.761		25.059	0.593		7.77	0.223		4.143	1.394		9.845	0.188		1.119	0.13		66.854	0.469		45.472	0.404		73.94	0.271
	153.682	0.097		28.631	0.169		55.506	0.501		4.05	0.551		2.202	7.273		3.439	0.223		3.133	49.689		40.997	1.54		25.567	0.171		11.749	0.195		13.037	0.236		10.447	0.146		10.508	0.138		35.616	0.233		14.914	83.542		47.835	19.432
	85.43	0.11		53.043	0.125		59.855	0.728		7.708	2.5		17.316	0.679		1.44	0.572		3.435	46.224		62.646	1.381		27.276	0.174		18.155	0.282		9.332	0.252		11.389	0.198		0.999	0.121		44.851	0.552		13.792	92.779		61.289	0.374
	51.015	0.091		38.824	0.138		54.133	0.585		5.297	0.371		3.208	0.562		4.461	0.25		3.487	46.298		29.278	1.609		52.534	0.171		10.06	0.447		17.509	0.174		9.155	0.141		10.695	0.181		12.127	76.502		36.726	0.491		65.361	0.272
	92.024	0.104		62.461	0.213		54.129	0.833		3.646	0.375		15.148	0.56		1.389	0.248		3.131	43.6		23.086	1.53		55.134	0.191		12.079	0.221		10.57	0.262		6.836	8.157		1.742	0.302		3.043	0.979		53.188	0.367		10.189	63.318
	35.225	0.061		7.025	0.155		64.929	0.615		9.83	0.433		11.125	0.334		1.696	0.207		3.311	54.55		18.138	1.836		58.276	0.175		5.763	0.373		11.206	0.295		13.363	0.153		1.31	0.14		34.318	0.605		42.622	0.514		10.667	65.605
	36.555	0.049		19.768	0.152		54.796	0.629		3.271	0.527		5.086	0.443		4.61	0.219		1.637	0.885		17.19	2.084		51.816	0.208		10.158	0.351		6.592	1.334		4.714	0.146		1.306	0.134		23.998	185.728		59.891	0.427		3.993	0.798
	113.483	0.312		11.112	0.157		68.105	0.556		14.892	0.585		12.974	0.603		1.672	0.255		3.074	3.374		27.244	2.135		32.911	0.19		10.43	0.323		7.456	0.226		3.022	22.869		8.862	66.097		2.592	0.513		51.056	0.497		73.862	0.432
	65.649	0.103		33.579	0.191		70.925	0.648		15.739	0.439		9.147	0.517		2.7	0.462		1.955	2.387		24.94	1.756		52.534	0.287		8.26	0.313		19.319	0.138		5.961	0.207		10.684	74.137		44.691	0.956		45.77	0.472		11.198	66.159
	69.293	0.341		36.221	0.164		72.156	0.586		14.285	0.452		4.113	0.574		2.475	0.478		3.636	60.096		36.411	1.996		39.158	0.175		14.298	0.206		15.009	0.194		8.244	15.976		1.079	0.123		6.465	36.329		37.933	0.398		19.634	3.865
	83.29	0.083		27.716	0.177		61.274	0.513		5.606	0.443		2.5	0.461		2.728	0.24		2.754	4.355		30.445	1.709		34.358	0.374		27.745	0.189		15.04	0.151		7.806	11.639		1.446	0.14		19.605	150.242		45.877	0.454		63.227	0.4
	62.988	0.133		13.064	0.151		64.401	0.594		3.958	0.506		3.779	0.586		2.073	0.259		2.877	2.925		27.671	1.716		19.212	0.209		15.648	0.253		11.998	1.587		5.561	9.147		1.506	0.142		54.21	0.587		49.815	0.483		12.925	93.779
	109.839	0.321		54.219	0.213		58.415	1.116		14.6	0.5		19.27	0.309		1.441	0.315		3.703	7.385		21.257	1.742		15.914	0.186		10.623	0.215		9.104	2.039		3.52	10.558		1.515	0.244		47.227	0.281		36.669	0.521		60.409	6.072
	182.602	0.469		47.6	0.255		59.468	0.454		3.002	0.564		13.413	0.444		3.548	0.274		3.209	2.854		20.497	1.672		43.319	0.22		15.507	0.229		10.962	0.166		3.334	3.469		7.24	41.945		44.758	0.525		24.835	0.401		61.189	7.309
	71.953	0.084		37.534	0.256		58.87	0.448		3.264	0.461		11.681	0.422		5.437	0.276		2.737	0.833		45.479	1.736		25.692	0.673		10.546	0.297		13.116	0.247		3.578	1.692		1.04	0.131		48.46	0.27		43.825	0.388		68.821	0.479
	133.322	0.091		24.1	0.168		53.748	0.653		4.004	0.454		11.775	1.527		1.854	0.294		4.447	1.383		20.817	1.737		23.954	0.272		9.872	0.338		11.314	0.157		4.035	1.873		1.192	0.142		48.226	0.215		15.347	103.746		88.152	37.048
	174.851	0.619		57.764	0.133		75.388	0.51		14.257	0.416		2.956	0.598		1.833	0.266		2.952	1.071		30.44	1.718		43.262	0.205		22.873	0.312		12.196	0.235		4.794	20.746		1.205	0.148		32.335	0.247		17.383	111.296		79.672	36.845
	78.084	0.141		48.513	0.147		79.269	0.501		13.394	0.559		11.751	0.789		4.036	0.276		2.53	0.702		38.012	1.634		31.331	0.204		9.946	0.288		5.235	0.498		4.42	15.165		1.889	0.221		31.385	5.641		40.368	0.612		71.845	30.319
	314.189	0.155		26.053	0.119		62.272	0.423		16.447	0.463		11.917	0.535		4.087	0.303		3.085	0.941		50.358	2.257		36.42	0.185		14.976	0.207		8.753	4.441		3.435	13.362		2.888	0.13		35.656	0.315		30.179	0.521		64.56	0.496
	98.155	0.087		45.053	0.13		61.833	0.67		3.868	0.465		10.258	0.431		1.19	1.43		2.07	0.5		26.854	18.005		33.851	0.216		16.89	0.249		11.483	0.199		3.521	7.029		1.555	0.127		44.876	1.043		13.863	0.549		50.081	1.256
	213.662	0.929		13.376	0.133		64.865	0.567		11.708	7.28		11.643	0.461		2.117	0.885		5.178	0.577		21.883	0.882		42.531	0.185		10.524	0.214		9.845	0.364		4.727	14.88		1.182	0.162		29.084	0.341		27.125	0.511		70.922	0.701
	101.973	0.13		66.53	0.111		69.185	0.534		12.508	0.489		10.725	0.31		3.255	0.361		4.603	0.492		25.574	1.037		25.543	0.298		13.293	0.206		14.147	0.249		1.879	4.816		0.996	0.119					43.635	0.557		53.843	0.477
	58.592	0.077		19.551	0.276		83.675	0.545		7.789	2.337		6.151	0.349		2.392	0.334		4.343	95.836		29.024	1.146		12.953	0.196		17.457	0.291		5.625	5.097		5.398	7.488		1.116	0.128					45.226	0.758		72.735	7.035
	34.415	0.435		25.455	0.153		54.396	0.499		8.95	0.866		10.429	1.164		2.884	0.22		2.314	1.056		36.845	1.219		21.213	0.145		12.271	0.213		13.607	0.139		5.478	11.407		1.064	0.166					32.894	0.442		36.19	0.586
	89.306	0.111		65.455	0.133		86.338	0.47		31.349	0.457		10.057	0.426		4.526	0.259		4.181	0.668		26.86	0.985		35.244	0.802		14.197	0.238		6.646	0.214		6.139	5.165		1.59	0.132					43.706	0.523		2.322	0.46
	47.371	0.092		42.673	0.206		59.107	0.42		5.717	0.495		2.923	0.749		1.954	0.277		4.594	0.44		38.019	1.015		30.08	0.194		14.081	0.208		8.649	5.048		3.563	13.171		1.122	0.1					3.306	1.712		7.769	0.844
	69.351	0.103		27.297	0.114		51.69	0.461		5.334	0.706		10.179	0.59		4.056	1.441		6.548	0.415		17.463	0.841		24.149	0.205		14.483	0.37		5.776	4.885		3.056	6.5		7.419	0.709					37.026	0.561		5.838	0.514
	109.607	0.113		70.236	0.19		65.984	0.45		6.113	0.468		7.571	0.346		5.305	0.502		6.901	0.551		19.813	1.199		30.587	0.486		12.419	0.222		17.763	0.33		3.718	13.489		1.154	0.13					51.067	0.549		2.29	0.524
	54.254	0.142		96.934	0.119		53.015	0.895		5.777	0.52		11.049	0.484		8.111	0.499		8.261	0.347		31.014	1.004		42.594	0.244		15.596	0.204		8.336	0.704		4.684	4.643		1.555	0.176					49.337	0.429		48.18	0.446
	118.631	0.793		54.708	0.148		82.232	0.473		4.47	0.56		18.654	0.423		4.743	0.505		9.061	0.551		32.77	1.155		32.468	0.199		14.23	0.214		6.132	0.295		3.878	5.762		1.776	0.156					23.031	0.674		52.497	0.487
	119.151	0.323		82.969	0.189		65.839	0.534		4.716	0.492		7.928	5.652		7.035	0.49		6.777	0.573		44.829	0.941		22.917	0.258		14.181	0.199		5.813	0.193		6.233	6.235		1.508	0.14					15.781	102.092		35.329	0.723
	155.128	0.653		67.03	0.151		73.986	0.549		12.135	0.762		8.022	0.328		6.942	0.401		6.348	0.32		21.041	0.765		20.085	0.178		13.745	0.335		6.627	0.223		7.223	6.641		0.9	0.093					40.277	0.581		55.829	0.528
	165.828	0.074		29.983	0.113		52.241	0.485		7.354	2.201		4.246	0.8		3.584	1.186		14.08	0.401		42.819	1.007		19.439	0.344		21.175	0.197		10.772	0.278		13.821	30.812		1.43	0.127					42.243	0.605		52.309	0.427
	309.793	0.173		32.717	0.114		59.79	0.436		7.229	0.518		7.355	144.284		3.966	0.452		12.847	0.636		10.102	0.844		40.856	0.205		15.157	0.289		8.121	0.143		12.484	21.31		1.656	0.115					27.722	0.717		55.459	0.451
	161.432	0.497		54.708	0.108		26.258	0.399		8.863	0.507		6.189	0.434		11.136	0.344		5.464	0.371		34.831	1.049		41.624	0.267		15.572	0.183		7.408	0.219		12.347	23.55		1.216	0.134					13.181	90.014		55.578	0.631
	60.038	0.234		70.626	0.196		56.669	0.429		5.704	0.464		12.82	0.315		3.944	0.414		1.719	4.317		19.409	0.969		22.965	3.151		19.233	0.204		24.32	0.141		12.352	48.604		14.117	0.156					39.595	0.434		36.378	9.721
	102.262	0.101		57.017	0.133		84.449	0.458		7.911	0.465		15.091	244.808		8.547	1.239		8.64	0.464		28.455	1.097		26.96	0.242		17.747	0.268		2.302	0.414		23.714	32.956		1.578	0.159					29.42	0.461		29.432	0.754
	92.082	0.273		30.361	0.158		88.133	0.507		5.488	0.436		4.533	0.454		10.084	0.377		3.615	0.416		26.494	0.935		18.937	3.826		12.001	0.193		24.148	0.195					1.206	0.109					34.076	0.688		58.579	0.533
	183.932	0.192		65.925	0.133		64.765	0.466		6.207	0.416		6.465	51.326		7.912	0.372		6.375	0.448		26.769	0.806		33.448	0.249		13.972	0.239		10.975	0.744					10.233	0.557					2.384	1.718		45.484	0.558
	54.717	0.614		27.927	0.14		52.482	0.447		4.12	0.553		5.169	1.602		9.854	0.284		13.429	0.479		34.352	1.251		28.214	0.205		20.885	0.345		12.741	0.31					1.806	0.118					21.356	0.882		47.558	0.435
	92.371	0.131		53.225	0.134		55.092	0.566		10.484	0.647		4.963	0.813		9.799	0.551		8.916	0.487		48.764	0.93		14.891	0.19		22.839	0.256		11.233	1.73					1.448	0.141					41.746	0.905		73.764	0.532
	99.659	0.384		22.461	0.157		79.761	0.5		4.916	0.508		6.598	31.011		3.858	0.368		11.584	0.372		16.451	0.725		27.829	0.203		8.857	0.349		23.26	0.143					11.934	0.168					4.949	0.76		61.314	0.345
	78.084	0.082		45.89	0.123		83.528	0.612		6.678	0.598		13.851	239.751		5.896	0.362		5.433	0.573		36.25	1.065		33.081	4.725		24.458	0.209		6.079	0.908					1.638	0.145					15.33	95.49		64.502	0.423
	43.149	0.28		47.841	0.108		73.403	0.597		18.018	0.518		1.687	1.375		6.202	0.362		1.492	1.088		9.48	0.887		35.578	0.192		14.046	0.249		26.586	0.163					2.453	0.118					24.935	2.795		56.925	0.398
	39.505	0.088		36.564	0.125		77.345	0.599		3.86	0.448		4.734	0.556		6.581	0.299		10.388	0.327		33.601	1.055		45.783	0.214		30.567	0.209		21.197	0.145					7.731	0.262					4.361	0.888		66.81	0.843
	60.328	0.058		42.818	0.11		75.818	0.488		9.315	0.369		1.393	0.511		7.598	0.394		4.006	1.488		18.73	0.734		31.043	0.278		21.238	0.164		17.28	0.163					17.287	0.133					18.401	129.962		70.041	0.726
	180.346	0.509		28.392	0.148		83.362	0.503		5.011	0.501		4.169	1.258		6.117	0.503		12.601	0.447		17.681	0.695		12.185	4.628		21.924	0.186		30.17	0.142					1.935	0.156					14.539	24.697		65.202	0.766
	92.082	0.313		38.378	0.152		81.266	0.512		6.956	0.501		8.017	0.929		4.319	0.348		16.578	0.329		19.343	1.045		46.496	0.233		11.518	0.279		7.899	0.261					1.214	0.118					2.448	1.567		69.499	0.422
	60.906	0.049		51.459	0.117		74.351	0.478		11.983	0.515		3.315	1.06		4.31	0.559		12.867	0.356		35.267	1.1		14.054	0.258		12.914	1.119		11.971	0.152					2.085	0.202					6.199	25.367		57.459	0.573
	85.488	0.16		53.896	0.101		62.909	0.46		28.727	5.686		6.894	2.446		5.948	0.351		9.947	0.418		34.158	1.104		28.128	0.492		10.671	0.243		28.823	0.173					4.435	0.194					6.498	28.013		54.183	1.126
	213.257	0.21		38.125	0.116		81.396	0.614		21.873	0.596		1.756	0.525		3.074	0.383		3.891	67.014		17.983	1.093		27.62	0.18		15.934	0.22		21.221	0.124					2.34	0.258					18.295	102.596		66.236	1.533
	92.429	0.263		25.534	0.121		78.638	0.603		5.324	0.407		1.82	0.719		10.233	0.7		17.138	0.404		33.54	0.972		22.887	0.244		13.487	0.25		17.645	0.148					1.231	0.109					20.021	139.697		66.382	1.264
	61.542	0.097		40.887	0.118		94.724	0.513		8.522	0.406		12.202	0.462		6.844	0.569		7.59	0.387		32.014	0.925		21.656	7.467		14.764	0.841		27.622	0.142					1.526	0.119					10.979	66.95		52.81	0.724
	65.186	0.119		26.635	0.132		63.668	0.658		9.429	0.507		15.002	5.918		10.628	0.401		7.078	0.689		14.64	1.07		13.546	4.25		17.504	0.246		14.266	0.169					1.137	0.123					3.405	1.91		62.63	0.574
	102.262	0.09		41.62	0.102		94.38	0.492		8.519	0.524		6.018	0.189		9.962	0.411		1.37	2.527		30.746	1.059		27.942	4.055		16.416	0.311		9.609	1.33					4.991	0.13					13.485	82.17		62.582	0.469
	273.701	0.424		48.77	0.102		68.133	0.538		18.122	0.437		3.903	0.267		5.398	0.384		13.564	0.351		21.484	1.106		20.563	6.915		11.836	0.212		7.968	0.151					1.689	0.182					14.51	98.54		63.138	0.449
	110.417	0.266		33.658	0.119		54.224	0.529		17.552	0.63		3.959	0.214		11.563	0.608		4.102	67.245		34.756	1.044		14.813	0.207		17.898	0.292		17.719	0.123					8.805	0.331					17.274	119.897		87.669	0.716
	95.205	0.152		3.91	10.425		76.749	0.471		23.475	0.452		3.832	0.196		7.426	0.346		6.341	0.431		30.376	1.1		17.131	0.194		18.861	0.635		24.93	0.153					6.908	0.153					16.422	117.365		87.398	0.676
	37.654	0.051		9.087	0.169		65.062	0.439		21.056	0.529		3.81	0.205		8.421	0.266		9.618	0.392		25.873	1.017		31.661	0.194		18.018	0.273		15.503	0.112					1.738	0.176					6.197	9.866		82.15	0.679
	144.312	0.502		27.35	0.136		64.025	0.483		11.251	0.491		3.531	0.218		7.838	0.375		4.804	0.482		32.007	1.116		48.74	0.633		11.135	0.311		9.037	0.128					6.941	0.13					5.197	3.207		84.83	0.578
	88.901	0.076		21.383	0.15		78.89	0.501		1.086	0.305		6.739	0.189		5.105	0.626		2.023	5.631		28.339	1.221		60.121	0.236		10.957	0.172		26.029	0.17					10.683	1.173					17.283	93.629		72.947	0.672
	70.623	0.074		24.847	0.153		83.991	0.538		7.756	0.37		0.813	2.585		4.242	0.271		19.809	0.4		31.813	1.296		34.317	0.29		15.087	0.649		35.216	0.16					2.435	0.165					10.985	17.089		67.201	0.632
	135.462	0.095		31.685	0.122		63.356	0.585		15.353	0.266		7.149	0.278		4.035	0.534		8.447	0.473		34.226	1.223		46.397	0.618		12.697	0.264		18.522	0.131					1.206	0.139					18.023	97.257		62.164	2.008
	45.81	0.056		44.107	0.099		84.201	0.497		5.072	0.371		3.453	0.258		6.287	0.49		4.604	0.352		28.47	1.836		23.483	7.356		10.409	0.305		16.869	0.129					2.832	0.144					21.781	122.309		67.335	0.61
	50.032	0.094		39.845	0.114		72.768	0.506		6.341	1.63		4.466	0.226		7.677	0.517		3.891	0.336		33.718	0.861		3.283	0.248		13.879	0.177		23.114	0.171					29.112	0.215					68.694	0.336		59.431	0.58
	117.474	0.067		5.633	0.234		78.116	0.601		2.189	0.365		1.057	1.074		6.327	1.488		8.118	0.312		31.614	0.987		5.529	0.29		20.938	0.255		4.422	0.677					8.309	0.172					63.947	0.464		84.09	0.51
	75.019	0.256		30.872	0.105		80.334	0.529		3.496	0.217		1.929	0.238		6.382	2.31		7.724	0.418		10.549	0.896		3.276	0.27		12.75	1.217		7.49	0.12					14.476	0.147					53.596	0.375		64.64	1.138
	93.875	0.179		7.691	0.133		82.192	0.384		8.63	0.24		4.803	0.184		6.2	1.928		8.914	0.649		43.989	1.167		2.956	0.228		7.963	0.223		15.67	0.139					1.792	0.129					86.195	0.355		68.868	0.451
	30.251	0.18		39.859	0.114		69.473	0.509		4.45	0.217		2.05	0.34		2.895	0.27		2	6.629		25.74	1.084		7.264	0.309		13.662	0.195		27.284	0.185					4.693	0.136					2.553	0.829		74.33	0.578
	76.118	0.057		32.93	0.122		96.554	0.563		3.231	0.224		2.326	41.212		3.45	0.393		16.242	0.373		27.369	1.055		7.379	0.284		12.863	0.231		17.387	0.245					2.953	0.424					65.723	0.371		62.885	0.687
	72.474	0.068		34.166	0.168		69.883	0.634		14.275	0.39		1.059	0.355		8.024	0.335		8.87	0.373		26.027	1.779		6.382	0.287		16.53	0.159		19.631	0.194					3.662	0.427					22.59	106.609		64.177	0.461
	73.92	0.074		26.836	0.133		84.013	0.556		3.514	0.264		2.194	0.181		2.351	2.556		18.463	0.283		30.62	1.346		4.598	0.249		15.176	0.153		25.696	0.141					5.421	0.255					75.154	0.361		60.181	0.82
	62.872	0.066		23.317	0.121		94.898	0.446		3.153	0.192		3.352	0.279		2.666	0.301		1.23	0.824		18.953	0.756		3.179	0.248		14.994	0.209		31.081	0.146					17.474	0.377					66.951	0.319		80.491	0.536
	35.688	0.078		2.996	9.548		56.396	0.647		1.091	0.159		1.883	0.267		3.664	0.366		16.35	0.408		29.577	1.062		7.589	0.287		22.316	0.338		29.172	0.182					7.497	1.173					44.067	0.322		74.061	0.468
	40.893	0.068		12.671	0.155		80.709	0.518		5.323	0.481		3.082	0.216		3.086	0.944		6.703	0.386		25.01	0.985		8.5	0.333		15.519	0.274		14.389	0.159					0.909	1.597					54.427	0.418		54.086	6.075
	270.404	0.094		4.758	19.531		39.485	0.567		2.264	0.203		3.539	0.285		2.187	0.348		8.714	0.457		26.252	1.044		3.242	0.254		15.318	0.23		42.44	0.15					0.945	1.083					10.611	1.388		35.674	0.269
	165.655	0.079		20.341	0.109		77.214	0.494		2.942	0.192		2.572	0.235		2.153	0.349		3.863	0.457		14.26	0.919		10.27	0.328		14.791	0.136		9.495	0.133					4.782	1.221					56.978	0.396		52.193	0.23
	195.963	0.094		24.318	0.344		78.348	0.526		1.546	0.216		1.73	0.226		2.52	5.915		17.198	0.275		40.743	1.051		4.956	0.282		6.277	0.159		2.62	0.143					3.547	0.334					63.674	0.394		53.738	0.215
	68.599	0.108		30.293	0.163		92.957	0.521		2.265	22.003		4.276	0.24		2.223	0.544		6.837	0.326		32.007	1.368		15.215	0.398		18.929	0.235		11.609	57.033					3.222	0.271					38.689	0.393		50.849	0.203
	317.891	0.086		15.812	0.181		99.917	0.536		0.778	0.197		5.871	1.213		2.978	0.381		3.826	0.569		36.43	1.185		5.375	0.308		28.551	0.158		8.932	73.507					9.471	0.234					55.101	0.373		60.896	0.198
	291.168	0.148		27.865	0.357		95.759	0.538		4.347	0.48		3.375	0.158		1.465	0.419		3.031	0.374		9.668	0.756		17.743	0.361		22.357	0.135		3.144	7.371					2.653	0.178					57.501	0.334		68.156	0.258
	99.196	0.065		21.653	0.232		72.471	0.487		1.055	0.257		3.793	0.191		2.537	0.235		5.026	0.225		17.59	1.02		26.309	0.309		37.863	0.169		9.359	63.928					4.205	0.146					58.232	0.379		85.701	0.2
	32.333	0.188		10.559	0.11		76.706	0.462		3.422	0.465		3.517	1.042		3.536	0.413		2.54	0.528		30.382	1.382		9.29	0.393		20.162	0.2		4.135	11.347					12.544	0.203					77.651	0.615		41.395	2.843
	341.316	0.102		15.892	0.124		90.116	0.54		4.551	18.181		11.27	0.439		2.065	0.584		6.216	0.307		13.169	0.837		8.096	0.311		61.666	0.216		3.125	6.91					3.578	0.138					40.132	0.282		35.303	0.199
	116.028	0.097		14.854	0.144		81.257	0.553		14.634	0.386		1.76	28.034		5.815	17.394		6.669	0.267		28.49	0.904		16.379	0.356		36.762	0.148		8.941	17.252					4.076	0.12					23.907	0.473		57.458	1.71
	43.322	0.084		10.712	0.094		70.734	1.246		3.923	0.645		8.603	0.395		3.522	0.585		8.493	0.458		32.753	1.021		4.878	0.355		20.939	0.203		2.548	0.127					7.885	0.241					61.107	0.415		39.504	0.232
	197.988	0.09		8.696	0.175		85.018	0.668		1.644	0.34		3.833	0.217		1.392	0.5		4.048	0.788		15.249	0.924		9.755	0.361		15.897	0.201		5.558	20.791					9.123	0.212					9.985	58.064		56.046	0.268
	92.429	0.13		24.178	0.128		78.836	0.494		2.993	0.32		7.828	0.257		2.652	0.296		5.101	0.28		22.127	1.069		9.744	0.456		27.077	0.31		4.513	23.458					3.039	0.175					50.144	0.392		44.813	0.649
	170.398	0.079		12.643	0.154		112.172	0.552		5.172	0.252		2.419	41.447		1.785	0.258		11.261	0.294		15.195	38.669		3.998	0.264		7.375	0.212		8.706	23.694					5.916	0.195					71.283	0.368		67.95	0.306
	68.367	0.067		24.459	0.121		95.966	0.704		3.593	0.175		9.028	0.329		2.875	0.48		3.065	0.376		34.111	1.008		20.327	0.343		16.689	0.204		5.757	19.314					3.779	0.158					16.137	96.852		58.241	0.198
	184.858	0.094		14.631	0.24		79.06	0.575		9.888	181.214		4.741	0.273		2.47	0.485		12.893	0.323		27.629	1.26		18.24	0.336		19.529	0.197		3.09	4.785					11.702	0.283					58.616	0.501		62.709	0.34
	137.082	0.075		8.201	0.142		57.687	1.783		5.273	0.212		1.803	0.419		1.535	0.496		8.754	0.251		36.39	1.156		9.099	0.344		22.354	0.227		13.752	60.593					3.823	0.188					53.743	0.496		62.473	0.208
	43.612	0.072		6.788	0.153		87.78	0.641		5.464	0.227		2.679	0.502		1.661	0.769		12.276	0.275		16.561	0.772		10.68	0.382		11.517	0.299		4.789	17.503					1.964	0.163					65.642	0.45		63.87	1.583
	233.906	0.112		13.257	134.532		106.505	1.458		6.523	83.075		6.827	2.009		4.407	0.381		2.537	0.306		33.142	0.967		5.088	0.265		25.521	0.265		6.544	38.236					3.791	0.175					54.541	0.351		66.594	0.192
	189.254	0.091		15.797	0.227		84.58	0.588		5.166	0.389		3.41	53.254		3.922	0.419		2.635	41.507		33.628	0.972		14.421	0.298		29.79	0.23		8.183	20.686					8.385	0.163					14.573	70.965		76.929	0.254
	276.014	0.122		8.527	73.939		89.538	0.45		1.899	0.374		4.354	75.307		3.848	0.804		17.788	0.212		25.318	1.234		7.02	0.461		24.715	0.248		5.062	5.217					1.212	0.133					47	0.432		64.436	0.246
	81.034	0.086		8.037	0.16		86.324	0.566		1.923	0.447		2.599	0.258		3.738	0.54		3.758	0.298		13.096	0.866		3.424	0.262		19.663	0.15		7.065	23.196					1.432	0.163					46.584	0.44		49.46	0.312
	59.576	0.116		4.297	38.329		79.926	1.711		3.274	28.416		4.498	0.281		2.11	0.39		23.386	0.277		19.459	0.832		23.628	0.283		17.987	0.222		5.593	6.344					2.449	0.134					15.964	107.369		69.179	0.734
	112.442	0.072		11.709	102.037		87.806	3.129		4.995	0.277		4.563	0.265		6.985	0.56		4.083	0.281		44.174	1.019		10.525	0.272		8.846	0.189		14.498	0.923					1.163	0.119					46.931	0.379		57.59	8.431
	69.351	1.289		10.162	89.016		19.477	1.91		1.661	0.399		4.129	60.298		1.55	0.592		17.931	0.278		34.443	1.026		11.971	0.306		12.153	0.228		3.401	1.242					2.569	0.166					38.972	0.451		56.015	0.361
	36.96	0.061		54.646	0.155		1.937	1.617		4.017	0.262		4.104	0.24		1.377	1.055		9.687	0.274		25.487	0.875		9.736	0.323		19.377	0.293		10.753	82.909					3.499	0.173					46.632	0.451		55.828	0.82
	76.06	0.522		18.507	0.161		1.898	0.474		1.607	0.275		5.78	0.252		2.113	0.783		23.489	0.292		17.585	73.806		17.929	0.328		22.343	0.297		7.682	44.444					2.53	0.131					17.899	120.522		57.011	0.338
	294.234	0.158		28.714	0.169		2.203	0.624		4.131	0.204		4.137	71.014		3.393	0.373		2.124	0.873		26.644	0.966		22.897	0.291		22.278	0.281		5.876	2.644					3.237	0.156					27.546	85.197		15.953	149.959
	88.554	0.065		58.026	0.085		3.507	0.579		1.113	0.171		2.499	0.698		4.499	0.772		25.392	0.379		40.559	0.866		22.666	0.433		17.065	0.269		3.905	0.888					1.51	0.15					64.443	0.419		64.215	10.054
	153.219	0.179		1.062	0.188		3.462	83.156		3.065	0.33		3.401	0.639		1.621	0.457		4.302	0.302		30.599	0.872		22.447	0.355		16.89	0.206		5.579	1.49					1.543	0.126					44.043	0.441		53.895	0.283
	368.154	0.15		41.854	0.15		5.244	2.363		2.271	0.241		2.477	0.704		1.348	0.965		20.038	0.204		25.147	0.81		12.465	0.356		9.652	0.133		6.552	0.614					2.311	0.099					12.054	73.567		65.866	0.289
	41.356	0.13		59.082	0.146		17.268	0.229		6.751	44.186		4.724	0.314		1.586	0.549		12.534	0.273		26.804	25.003		15.693	0.364		20.29	0.168		9.37	43.015					1.846	0.138					4.681	0.725		58.693	0.25
	100.237	0.111		74.982	0.122		22.021	0.216		1.558	0.368		4.653	0.281		1.711	0.616		4.091	0.413		29.627	1.122		11.446	0.341		15.16	0.172		8.178	45.207					1.654	0.153					13.327	1.652		65.482	0.922
	315.866	0.081		6.858	0.206		56.782	0.559		1.597	0.26		4.849	0.545		1.2	0.69		11.402	0.31		28.336	0.755		8.578	0.296		14.051	0.231		4.399	1.133					3.631	0.246					26.278	82.846		55.313	0.564
	34.357	0.093		8.376	60.695		42.498	0.482		1.221	0.23		7.365	0.342		3.487	0.762		21.559	0.361		13.187	1.095		22.695	0.367		5.722	0.531		3.102	3.053					4.003	0.174					3.544	0.894		27.48	169.194
	35.456	0.07		15.863	52.075		38.748	0.464		3.793	0.537		3.492	55.274		1.836	0.931		17.893	0.294		23.338	0.833		8.404	0.401		25.914	0.204		5.668	1.122					1.348	0.172					4.857	0.686		62.812	0.914
	69.235	0.085		4.112	36.462		6.03	0.726		1.211	0.227		5.761	1.632		1.548	0.882		19.481	0.273		26.801	0.973		8.471	0.433		8.55	0.202		12.09	82.717					1.616	0.386					23.974	75.166		9.338	79.699
	32.795	0.058		4.55	22.491		10.401	0.554		1.398	0.681		3.322	56.623		1.279	1.714		13.442	0.307		25.665	1.032		13.2	0.358		13.672	0.179		1.737	0.645					1.489	0.192					25.893	59.758		62.827	1.224
	77.506	0.097		4.532	35.835		21.692	0.893		2.045	0.274		3.516	61.139		2.205	0.674		19.805	0.295		24.683	1.015		8.781	0.452		22.161	0.227		8.402	49.375					1.155	0.176					20.837	69.858		9.552	0.996
	55.122	0.139		8.476	1.547		23.361	0.831		5.036	47.3		7.723	2.267		4.97	106.541		14.444	0.342		39.146	1.153		12.572	0.426		16.585	0.201		2.036	0.159					1.968	0.234					42.739	179.721		62.145	0.33
	770.839	0.198		8.428	76.126		13.432	0.767		1.472	0.329		3.076	1.549		1.612	1.22		12.492	0.31		23.85	0.84		6.703	0.265		19.708	0.213		16.988	58.767					1.883	0.523					19.197	114.624		9.412	79.669
	136.33	0.173		4.415	23.761		14.676	0.7		1.347	0.399		3.401	1.293		1.503	0.557		20.652	0.322		28.816	1.03		15.218	0.434		10.741	0.453		3.055	8.786					3.779	0.228					19.606	118.811		65.514	0.353
	115.16	0.099		6.407	61.549		25.174	0.376		1.579	0.469		27.699	0.339		6.593	152.095		5.467	0.554		29.011	27.915		16.482	1.666		14.863	0.207		5.906	11.97					1.213	0.151					5.945	2.527		14.723	143.74
	52.114	0.147		6.371	50.916		25.498	0.397		1.775	0.214		29.438	0.31		1.647	0.578		16.857	0.316		29.944	0.994		8.18	0.36		17.354	0.29		10.456	77.461					5.551	0.446					5.343	43.461		61.006	0.462
	117.416	0.143		10.481	93.047		3.761	0.529		1.81	0.238		36.493	0.328		1.834	0.557		20.931	0.404		31.664	1.008		3.329	0.198		7.63	0.328		7.245	56.771					4.273	0.188					10.745	79.999		11.21	102.903
	92.024	0.172		13.704	21.019		13.87	0.608		5.327	0.145		34.088	0.34		4.527	81.846		5.806	0.71		16.512	57.007		8.64	0.398		11.076	0.15		2.663	0.189					1.224	0.163					6.246	59.151		9.892	74.862
	93.412	0.121		13.027	131.696		24.535	0.481		10.497	0.308		53.873	0.296		1.316	0.803		27.551	0.351		29.456	0.975		18.171	0.407		20.067	0.22								1.669	0.366					5.455	1.808		39.571	0.755
	33.952	0.196		12.934	25.82		15.87	0.463		7.702	0.149		32.209	0.39		4.006	71.368		15.525	0.342		11.647	0.826		17.146	0.426		21.132	0.203								1.326	1.584					5.455	56.165		81.903	0.56
	94.222	0.184		10.386	86.097		12.845	0.69		8.341	0.347		35.159	0.427		8.736	177.115		24.828	0.277		45.327	0.957		16.686	0.431		14.783	0.16								4.651	0.449					8.192	56.759		51.97	0.749
	47.198	0.07		13.524	113.459		8.152	0.995		6.734	0.237		17.046	0.319		9.009	168.331		27.032	0.391		41.367	1.066		11.172	0.264		22.771	0.227								1.998	0.248					20.955	0.253		72.778	0.663
	54.37	160.26		11.411	38.066		23.689	0.557		5.464	0.18		37.904	0.353		5.016	1.35		18.947	0.487		22.584	1.123		9.083	0.31		24.852	0.266								1.393	0.16					4.173	1.632		50.136	0.847
	695.588	0.294		5.668	27.835		10.641	0.529		12.893	0.385		24.663	0.512		1.137	0.219		19.916	0.301		32.274	0.897		12.918	0.343		6.669	0.163								5.622	0.187					24.632	0.254		75.898	0.676
	133.091	0.265		3.454	2.965		6.251	0.667		8.336	0.226		26.15	0.27		1.053	0.25		9.709	0.419		15.212	40.075		12.883	0.327		25.416	0.34								1.942	0.189					24.117	0.272		81.628	0.792
	77.448	0.164		1.274	0.468		19.162	0.519					15.083	0.474		4.361	79.974		26.535	0.36		17.469	0.933		11.72	0.263		14.487	0.165								1.289	0.165					22.809	0.747		73.855	0.71
	34.531	0.241		14.073	129.744		17.232	0.48					15.587	1.179		5.269	91.46		17.785	0.321		30.101	0.907		22.295	0.349		7.174	0.247								1.742	0.283					14.452	0.531		78.567	0.731
	44.653	0.188		9.168	82.061		17.543	0.404					37.754	0.367		11.603	177.543		18.837	0.338		24.515	0.902		3.131	0.259		24.906	0.332								2.49	0.232					22.097	0.223		44.331	0.714
	63.682	0.649		5.318	34.303		2.023	0.527					16.921	0.487		14.253	186.74		21.95	0.349		14.967	58.828		12.867	0.43		30.427	0.185								1.798	0.198					20.002	0.227		41.43	0.623
	63.393	0.279		7.731	55.973		1.659	0.457					6.465	7.447		3.544	1.946		18.735	0.287		11.774	0.931		3.828	0.374		13.974	0.172								1.827	0.188					15.508	0.281		73.699	0.55
	31.002	1.407		11.516	0.078		8.644	0.64					46.231	0.407		11.591	178.349		19.76	0.483		9.033	0.996		10.011	0.368		37.659	0.276								3.816	21.694					21.044	0.187		56.304	0.689
	46.561	24.643		1.414	0.654		7.819	0.684					28.555	0.322		18.475	218.735		19.984	0.502		30.769	0.971		15.377	0.288		23.424	0.193								1.433	0.204					23.908	0.456		45.385	0.581
	144.254	0.459		10.616	0.189		18.234	2.17					16.246	0.662		20.445	242.198		5.741	0.405		30.841	1.073		8.762	0.471		6.561	0.885								8.075	0.171					24.992	0.625		64.028	0.565
	185.957	0.707		2.4	0.309		30.328	0.862					19.328	0.352		12.544	162.163		6.229	0.282		30.263	0.912		20.635	0.331		52.46	0.279								1.812	0.222					13.635	0.265		46.461	0.52
	57.031	1.218		5.519	36.251		12.436	2.005					9.452	0.34		12.234	157.323		26.483	0.405		20.211	65.444		13.787	0.32		15.915	0.2								4.564	1.426					27.866	0.267		42.159	0.597
	43.901	0.358		4.823	0.208		8.297	4.09					17.225	0.853		20.018	236.177		17.162	0.281		35.487	0.98		7.261	0.314		24.559	1.781								3.829	12.999					9.403	60.46		42.822	0.659
	105.674	170.822		4.31	27.738		9.264	172.102					18.736	0.367		11.688	148.696		6.343	0.334		31.973	97.754		16.239	0.255		26.369	0.36								1.561	0.18					4.196	22.427		43.903	0.716
	67.962	6.746		1.446	0.212		8.56	3.491					6.016	0.263		10.432	145.95		6.145	0.427		37.424	0.861		3.174	0.235		28.09	0.338								1.59	0.195					21.944	0.205		15.28	65.44
	129.273	0.078		2.513	0.168		21.985	1.621					24.412	0.32		24.258	246.442		22.704	0.371		43.527	1.163		19.774	0.34		21.538	0.224								1.385	0.211					23.2	0.295		62.339	0.648
	98.676	0.163		4.116	0.227		42.626	0.767					32.282	0.371		16.113	209.024		6.117	0.566		26.914	33.265		10.742	0.319		25.819	0.193								2.239	0.252					28.221	0.308		48.027	0.46
	225.635	0.642		3.369	0.205		46.218	0.43					2.694	2.401		13.757	187.281		31.784	0.357		38.55	0.907		15.259	0.341		16.859	0.178								4.045	24.077					4.538	39.84		47.787	0.448
	71.433	0.109		3.103	0.313		11.153	0.51					23.59	0.317		3.258	0.684		23.778	0.289		34.928	0.84		11.807	0.319		19.798	0.214								1.846	0.212					17.365	0.275		42.207	0.884
	62.352	0.123		2.015	0.157		20.704	0.661					14.472	0.315		3.841	0.772		8.396	0.326		10.814	1.949		4.323	0.251		11.432	0.175								1.843	0.222					20.941	0.252		50.283	0.747
	93.123	0.099		5.396	0.776		17.925	0.65					5.648	0.603		3.179	0.654		24.818	0.637		19.567	65.04		4.833	0.342		13.565	0.173								2.007	0.228					3.21	4.998		51.652	0.504
	58.072	0.248		9.318	0.184		41.706	0.57					24.636	0.404		11.658	148.626		29.59	0.431		26.277	0.926		9.233	0.377		18.88	0.207								1.929	0.19					12.09	0.237		45.323	0.521
	161.895	0.066		2.045	8.474		15.72	0.692					28.188	0.42		7.07	0.737		11.205	0.372		36.473	0.914		15.531	0.314		10.29	0.222								1.773	0.16					20.694	0.273		52.442	0.489
	34.589	226.86		4.627	0.421		37.054	0.595					15.259	0.339		3.987	0.746		15.159	0.308		34.42	34.176		12.349	0.299		21.973	0.203								1.828	0.256					24.508	0.213		60.275	0.681
	83.579	0.071		13.411	0.191		13.697	0.434					10.429	0.242		3.445	0.731		27.094	0.276		29.087	94.255		3.44	0.313		29.92	0.195								2.292	0.24					13.005	0.277		66.717	0.887
	80.282	0.071		16.059	0.173		29.116	0.505					15.374	0.224		3.462	0.817		30.416	0.361		25.252	63.243		6.806	0.342		6.718	0.195								1.891	0.206					17.068	0.26		61.727	0.741
	134.71	0.073		13.012	0.171		35.691	0.605					14.826	0.355		3.352	0.598		27.019	0.363		17.778	0.777		4.97	0.278		15.104	0.21								5.557	34.229					12.942	0.236		63.753	0.673
	46.561	0.161		9.105	0.173		24.905	0.883					14.561	0.322		4.273	0.611		5.494	0.402		15.748	0.719		5.91	0.297		17.301	0.161								2.199	0.191					13.191	0.302		50.706	1.009
	447.684	0.08		2.243	5.51		43.726	0.552					14.108	0.348		6.991	0.746		20.488	0.296		12.915	2.183		7.818	0.354		21.017	0.418								1.877	0.177					24.453	0.405
	210.423	0.059		22.356	0.202		35.035	0.476					46.845	0.308		4.666	0.686		14.586	0.383		11.141	0.811		5.715	0.243		28.344	0.166								3.014	0.25					25.139	0.744		66.9464	5.71069
	562.613	0.065		25.165	0.144		39.337	0.702					27.759	0.362		5.305	0.653		26.223	0.361		22.891	59.757		5.722	0.362		20.514	0.224								3.099	0.189					8.654	2.074		22.5246	21.3999
	48.759	0.068		20.71	0.143		21.614	0.585					32.773	0.441		3.438	0.595		5.678	0.509		23.187	58.278		4.089	0.358		9.123	0.196								9.153	0.166					7.673	65.793
	92.487	0.088		36.513	0.114		40.699	0.612					44.075	0.317		5.035	0.645		16.524	0.407		22.241	0.961		5.726	0.445		19.261	0.175								5.521	33.893					8.423	75.086
	67.673	0.064		33.123	0.182		23.065	0.554					26.016	0.306		8.19	1.102		15.058	0.393		11.704	0.86		8.091	0.482		13.934	26.309								1.968	0.246					9.634	70.201
	229.858	0.11		28.654	0.129		44.47	0.73					15.056	0.391		3.07	0.664		15.123	0.382		27.371	0.999		8.355	0.384		9.725	36.817								2.521	0.219					12.854	70.246
	76.465	0.082		30.6	0.174		23.26	0.546					33.363	0.311		4.719	0.595		24.886	0.26		14.493	0.876		4.827	0.369		6.315	0.146								2.561	0.31					13.453	85.534
	308.868	0.088		25.481	0.098		30.899	0.505					8.3	0.812		8.169	0.808		6.728	0.616		11.855	0.862		6.008	0.295		5.086	0.355								2.814	0.193					7.298	62.618
	56.337	0.081		35.653	0.164		40.311	0.44					29.843	0.547		3.81	0.881		13.139	0.436		7.133	0.948		4.854	0.284		3.565	1.215								6.046	26.686					9.691	77.847
	832.439	0.078		23.493	0.157		43.037	0.456					25.83	0.239		5.096	0.633		29.427	0.317		26.247	0.992		3.726	0.298		5.652	0.722								1.865	0.228					12.078	77.113
	66.979	0.08		1.851	0.33		21.306	0.601					20.723	0.282		4.138	0.663		7.537	0.366		13.805	0.787		5.873	0.404		17.195	77.613								2.419	0.187					5.228	45.527
	30.019	0.089		11.918	0.205		56.614	0.553					31.324	0.377		8.244	1.119		13.662	0.317		18.49	0.828		7.847	0.367		6.445	0.727								3.125	14.506					8.932	87.144
	190.237	0.08		21.772	0.161		22.798	0.461					24.921	0.341		5.609	0.698		25.057	0.38		27.396	1.004		5.972	0.422		7.818	54.884								4.193	0.245					9.103	84.818
	60.559	0.054		37.036	0.093		20.119	0.403					25.831	0.433		4.919	0.583		12.616	0.32		15.668	1.08		9.89	0.322		14.64	48.05								5.114	27.524					6.84	67.416
	515.878	0.065		30.086	0.181		30.69	0.542					27.292	0.413		6.636	0.626		11.907	0.335		10.229	1.11		3.365	0.325		18.583	59.426								6.258	34.532					23.74	0.892
	164.556	0.07		36.098	0.125		58.807	0.472					24.977	0.296		4.643	1.007		15.761	0.387		7.99	0.982		6.977	0.315		7.724	1.472								1.737	0.214					12.701	47.621
	130.372	0.089		25.572	0.125		8.496	0.573					29.718	0.373		7.546	0.524		14.057	0.494		12.008	0.778		13.768	0.386		37.42	0.176								1.988	0.189					11.626	117.218
	37.191	0.093		38.221	0.112		31.126	0.698					32.054	0.292		5.449	1.599		14.695	0.31		9.374	0.927		11.988	0.3		5.156	0.505								3.583	0.226					33.066	0.357
	48.181	0.061		24.502	0.151		25.838	0.846					29.298	0.305		5.552	0.668		12.209	0.364		7.473	1.049		9.015	0.407		2.998	0.4								4.933	0.213					34.027	0.351
	63.971	0.073		23.477	0.14		9.182	0.874					32.358	0.253		20.438	1.994		1.464	0.506		14.178	0.776		6.961	0.396		11.008	0.335								1.64	0.261					10.712	103.164
	59.113	0.072		39.132	0.099		30.049	0.779					21.061	0.321		3.864	0.501		15.232	0.34		12.002	0.683		6.411	0.251		6.065	0.83								1.61	0.221					39.554	0.444
	85.43	0.055		27.66	0.15		5.284	0.772					25.396	0.274		4.879	0.561		26.746	0.384		10.413	1.345		10.242	0.416		7.151	0.308								3.849	0.285					36.918	0.38
	77.853	0.06		29.332	0.134		11.574	0.806					39.374	0.272		5.647	0.624		2.035	9.997		9.657	0.846		6.39	0.33		11.188	0.758								1.564	0.26					29.496	0.299
	63.914	0.125		18.969	0.181		5.713	0.871					21.347	0.408		5.029	0.636		1.917	0.562		10.307	1.274		4.694	0.29		15.929	0.155								3.699	0.215					37.135	0.306
	34.646	165.917		40.615	0.187		5.512	1.116					20.8	0.449		4.544	0.57		9.835	0.511		12.409	0.755		12.548	0.122		6.766	0.552								9.782	48.525					29.192	0.327
	126.439	197.464		27.858	0.12		33.987	0.833					26.844	0.299		4.123	0.568		4.786	0.462		6.467	0.812		16.314	0.166		9.138	0.408								2.139	0.214					31.163	0.278
	78.027	225.322		14.008	0.183		13.913	0.7					34.394	0.338		6.704	0.565		2.998	0.494		6.924	1.017		19.376	0.172		9.689	1.281								2.211	0.222					32.007	0.31
	62.236	179.042		24.408	0.176		9.42	0.641					12.996	0.329		3.828	0.485		3.115	78.423		7.45	0.876		17.77	0.193		5.824	0.25								2.306	0.208					41.389	0.271
	174.447	224.253		56.174	0.139		9.129	0.696					31.116	0.356		6.988	0.535		5.439	124.302		5.243	0.735		12.654	0.197		19.402	0.261								2.554	0.207					32.69	0.314
	161.895	0.066		11.508	0.248		4.359	3.277					4.992	0.392		11.12	0.686		3.436	63.053		6.537	0.892		11.252	0.143		5.257	0.319								3.219	0.366					28.897	0.655
	34.589	226.86		28.775	0.162		6.574	1.932					11.057	0.466		5.058	0.518		4.588	104.292		13.161	0.895		16.626	0.172		12.713	0.647								3.497	0.208					26.64	0.344
	83.579	0.071		48.062	0.174		3.768	0.804					11.836	0.296		6.694	0.828		3.855	86.91		13.525	1.32		17.379	0.163		9.009	0.279								4.108	0.179					42.175	0.274
	80.282	0.071		41.404	0.105		7.355	0.999					41.417	0.344		6.68	0.677		4.136	101.909		14.445	0.978		9.153	0.143		21.049	0.323								2.232	9.98					39.443	0.298
	134.71	0.073		19.9	0.131		5.146	0.925					19.468	0.331					4.368	108.763		10.05	1.188		17.37	0.227		23.868	0.363								3.401	0.302					19.824	0.331
	46.561	0.161		27.844	0.134		3.775	0.756					44.201	0.283					5.146	130.366		13.028	1.063		20.852	0.165		11.893	0.302								2.46	0.231					33.626	0.272
	447.684	0.08		40.09	0.107		3.335	0.745					1.985	0.3					3.088	63.477		10.316	1.057		20.22	0.188		11.625	0.29								3.199	0.197					35.649	0.295
	210.423	0.059		16.386	0.168		8.222	3.203					3.148	0.367					5.276	145.538		17.743	1.031		20.92	0.22		40.134	0.186								25.334	0.241					41.689	0.608
	562.613	0.065		22.773	0.205		3.78	0.655					12.416	0.319					2.956	60.646		7.142	0.884		11.366	0.194		15.195	0.213								3.819	0.571					31.185	0.264
	48.759	0.068		33.93	0.16		8.773	3.676					25.221	0.408					6.767	155.91		5.938	0.918		20.533	0.24		6.881	0.431								3.969	0.935					35.166	0.291
	92.487	0.088		42.012	0.1								15.524	0.29					3.093	69.207		15.477	0.998		15.932	0.159		22.389	0.227								24.774	0.219					30.917	0.325
	67.673	0.064		24.88	0.114								8.817	0.343					3	70.811		11.685	1.317		18.095	0.146		24.256	0.212								2.626	0.296					36.887	0.269
	229.858	0.11		13.46	0.181								11.821	0.327					4.724	129.246		5.608	0.734		18.725	0.168		6.044	0.282								2.446	0.255					32.358	0.364
	76.465	0.082		3.727	0.266								8.027	0.332					4.673	119.688		7.21	0.867		26.144	0.165		9.505	0.265								2.891	1.042					33.556	0.285
	308.868	0.088		21.782	0.173								14.314	0.293					2.769	59.791		8.532	1.265		24.813	0.151		12.313	0.31								4.4	0.259					37.624	0.348
	56.337	0.081		12.717	0.249								1.635	0.309					3.826	97.617		8.768	1.062		20.724	0.202		10.741	0.357								3.653	0.206					47.3	0.536
	832.439	0.078		21.011	0.119														5.128	66.889		11.209	1.197		25.999	0.159		13.5	0.216								5.309	0.212					27.446	0.333
	66.979	0.08		19.872	0.276														4.122	91.971		10.903	1.229		22.879	0.187		20.788	0.233								16.019	0.167					40.075	0.291
	30.019	0.089		38.376	0.097																	6.696	0.942		13.182	0.139		28.944	0.166								16.115	0.159					14.014	92.484
	190.237	0.08		20.427	0.231																	12.375	0.993		11.066	0.172		17.122	0.244								2.798	0.622					24.967	0.524
	60.559	0.054		32.599	0.095																	9.046	1.06		26.583	0.281		10.925	0.269								1.664	0.196					27.094	0.419
	515.878	0.065		25.603	0.144																	23.356	1.072		19.942	0.207		31.896	0.174								28.16	0.214					28.264	0.428
	164.556	0.07		42.703	0.152																	5.583	0.878		11.348	0.162		32.279	0.211								41.971	0.208					8.66	54.81
	130.372	0.089		32.186	0.101																	16.251	0.805		15.064	0.21		14.736	0.23								5.46	0.163					26.995	0.372
	37.191	0.093		36.73	0.107																	16.207	0.833		14.389	0.162		11.479	0.216								2.668	0.182					18.84	0.472
	48.181	0.061		33.361	0.248																	10.832	1.315		16.037	0.151		11.355	0.285								3.028	0.268					29.045	0.805
	63.971	0.073		26.566	0.079																	11.362	1.497		16.101	0.164		14.655	0.412								31.111	0.515					33.923	0.761
	59.113	0.072		25.926	0.118																	11.14	0.956		16.851	0.16		18.844	0.262								31.191	0.191					30.383	0.344
	85.43	0.055		26.381	0.11																	11.356	0.953		22.679	0.179		15.432	0.245								57.646	0.174					40.96	0.383
	77.853	0.06		17.914	0.119																	17.155	0.819		26.954	0.186		12.068	0.217								26.623	0.195					29.792	0.346
	63.914	0.125		47.607	0.111																	7.908	1.014		21.398	0.188		27.191	0.209								45.204	0.213					9.47	94.287
	34.646	165.917		36.458	0.093																	9.008	1.153		16.869	0.271		9.025	0.253								49.686	0.664					8.926	64.738
	126.439	197.464		26.394	0.357																	26.376	0.912		25.685	0.205		15.906	0.258								11.777	37.773					11.784	105.244
	78.027	225.322		24.78	0.144																	7.022	0.973		25.939	0.161		6.588	0.312								4.588	0.198					10.67	64.772
	62.236	179.042		21.379	0.087																	6.973	0.795		22.742	0.215		19.129	0.203								50.574	0.212					13.012	95.573
	174.447	224.253		2.218	0.435																	11.124	1.479		15.226	0.254		25.39	0.24								6.409	0.167					13.675	130.619
	127.712	0.291		37.893	0.102																	12.825	1.724		21.177	0.468		19.329	0.294								29.711	0.22					3.724	1.463
	39.1	0.102		11.558	0.265																	9.742	1.089		13.571	0.175		39.592	0.204								8.889	0.167					15.2	56.373
	75.366	0.395		16.785	0.132																	9.569	1.057		14.692	0.218		27.064	0.188								29.655	0.238					16.436	69.829
	75.308	0.086		19.224	0.097																	11.163	1.519		12.987	0.186		18.428	0.278								1.95	0.245					12.186	109.75
	84.273	0.185		32.997	0.088																	11.662	1.351		17.266	0.158		25.703	0.24								3.116	0.304					2.172	2.492
	52.23	0.103		21.014	0.1																	11.777	1.151		20.094	0.157		16.902	0.246								14.851	26.411					10.79	3.686
	38.927	0.134		10.333	0.147																	13.565	1.374		14.405	2.093		16.971	3.648								59.458	0.218					15.7	95.548
	472.151	0.172		12.423	0.196																	23.433	0.889		13.119	0.167		12.485	0.229								6.964	0.298					7.827	48.873
	35.456	0.054		11.596	0.261																	23.285	1.053		2.562	0.162		15.416	0.204								28.186	0.218					5.612	2.178
	71.259	0.179		10.948	0.27																	20.588	1.265		3.481	0.146		24.793	0.249								2.235	0.18					9.248	2.715
	55.295	0.038		22.937	0.18																	22.117	1.154		3.012	0.172		18.928	0.299								40.882	0.234					4.377	1.938
	130.141	0.175		21.356	0.128																	22.612	1.189		2.461	0.152		23.309	0.177								36.439	0.231					7.523	2.892
	73.746	0.191		22.732	0.117																	9.885	0.886		2.243	0.153		11.257	0.29								8.953	0.143					11.168	106.846
	38.348	0.104		25.42	0.122																	13.814	1.133		6.932	0.16		31.722	0.195								56.478	0.192					4.851	1.463
	78.142	0.1		12.853	125.578																	16.426	1.424		2.902	0.164		20.424	0.295								2.853	0.356					2.693	6.964
	99.081	0.091		20.302	0.127																	12.761	0.943		1.74	0.118		16.954	0.338								2.85	0.237					6.573	30.097
	184.684	0.113		15.684	0.268																	14.801	1.058		2.914	0.639		36.301	0.176								2.913	0.229					12.721	113.523
	131.413	0.097		7.489	0.414																	13.644	1.125		2.653	0.505		28.03	0.188								55.773	0.254					11.471	99.848
	43.091	0.101		11.729	0.284																	16.046	1.202		2.418	0.133		27.733	0.19								15.706	0.218					9.645	74.53
	83.695	0.249		11.25	0.393																	13.626	1.129		1.657	0.159		16.143	0.226								4.987	0.178					2.593	9.249
	62.525	0.178		9.16	82.387																	23.955	1.226		2.87	0.335		13.385	0.255								1.733	0.359					8.632	56.106
	114.871	0.136		16.692	0.303																	7.607	0.924		1.655	0.169		26.008	0.208								24.9	0.178					11.768	96.439
	70.45	0.077		13.752	0.424																	6.969	0.448		2.315	0.292		30.128	0.185								36.215	0.244
	161.606	0.106		10.657	110.134																	6.58	0.666		14.261	0.319		11.753	0.337								22.489	0.194
	34.126	0.247		7.076	0.497																	5.61	0.437		14.438	0.251		19.127	0.245								2.341	0.4
	2735.04	0.151		11.995	104.734																	8.225	13.482		8.837	0.266		23.416	0.285								47.568	0.184
	37.307	0.181		2.56	12.595																	8.142	7.026		7.85	2.039		18.438	0.221								7.755	0.151
	50.842	0.158		11.348	0.515																	10.105	11.201		27.255	0.327		29.915	0.208								2.499	0.19
	98.965	0.116		1.445	1.598																	7.859	0.607		7.995	2.138		22.099	0.337								3.913	0.215
	43.207	0.126		20.557	0.126																	11.394	10.728		28.731	0.263		38.578	0.215								2.941	0.238
	98.386	0.145		1.344	0.714																	11.01	14.976		10.279	0.789		11.934	0.201								22.349	0.271
	75.655	0.68		9.282	0.31																	12.047	14.51		9.535	0.252		37.262	0.174								8.79	0.212
	58.477	0.074		2.061	0.517																	3.88	0.535		12.36	0.262		19.717	0.233								34.69	0.22
	478.745	0.244		1.401	3.162																	15.499	26.016		4.788	0.718		24.343	0.236								18.71	0.194
	31.349	0.096		1.395	2.61																	15.383	14.137		8.209	0.273		39.158	0.196								7.717	0.301
	97.75	0.243		1.317	0.556																	7.542	17.915		9.369	0.325		15.553	0.232								6.24	0.194
	81.266	0.122		1.392	0.591																	12.168	14.009		9.526	0.707		27.058	0.181								19.042	0.223
	55.353	0.097		0.993	0.771																	9.913	16.876		8.387	0.259		33.137	0.2								1.907	0.205
	426.226	0.216		1.568	4.192																	11.96	25.037		11.709	0.257		30.721	0.228								26.559	0.311
	39.852	0.392		1.394	0.814																	3.532	0.438		11.166	0.337		11.744	0.233								5.414	0.204
	47.024	0.219		7.735	0.145																	9.429	7.538		9.215	0.341		22.91	0.236								3.307	0.238
	48.008	0.106		18.726	0.111																	10.643	15.956		13.575	0.234		25.985	0.394								3.037	0.207
	251.606	0.159		6.266	0.161																	6.12	17.935		8.545	1.066		32.756	0.171								2.296	0.344
	79.415	0.252		8.217	0.15																	10.824	25.271		20.756	0.269		39.494	0.185								4.032	0.236
	78.547	0.097		2.142	0.315																	12.556	12.151		6.363	0.502		9.945	0.187								3.903	0.227
	112.21	0.079		2.705	0.155																	9.413	20.084		8.89	2.112		32.497	0.235								33.685	0.236
	58.361	0.145		5.118	0.231																	8.52	23.785		12.219	0.463		27.956	0.21								11.052	0.295
	273.469	0.123		16.618	0.146																	9.34	15.638		15.083	0.288		33.907	0.206								8.964	0.207
	70.739	0.145		1.042	0.27																	12.8	0.739		9.238	0.209		10.849	0.238								8.081	0.362
	72.763	0.187		4.506	0.509																	9.389	13.91		21.565	0.233		33.671	0.573								15.497	0.221
	543.063	0.147		1.282	1.009																	12.833	0.58		15.717	0.43		9.948	0.266								15.641	0.235
	439.876	0.161		1.196	0.82																	11.278	0.603		33.176	0.531		17.068	0.235								3.52	0.201
	55.353	0.147		4.142	0.439																	9.212	1.297		3.29	0.251		31.836	0.195								2.176	0.243
	128.001	0.136		30.001	0.173																	10.877	0.586		6.239	0.579		27.462	0.193								2.001	0.225
	80.34	0.169		41.397	0.108																	21.174	0.619		18.081	0.56		20.139	0.212								9.71	0.293
	111.748	0.243		0.944	0.618																	16.807	0.569		12.363	0.631		11.433	0.211								24.669	0.233
	73.689	0.282		3.405	0.161																	13.46	0.586		24.235	0.571		33.086	0.301								7.534	0.35
	49.858	0.166		21.102	0.131																	12.549	0.732		24.461	0.745		42.175	0.167								3.785	0.188
	38.695	0.129		8.404	0.311																	7.726	0.607		33.69	0.537		32.922	0.167								4.531	0.233
	332.929	0.144		3.056	0.23																	10.461	0.661		11.045	0.541		24.957	0.269								37.235	0.206
	47.082	0.273		5.067	0.297																	17.084	0.641		7.893	0.471		43.128	0.198								12.692	0.226
	70.681	0.125		1.972	0.36																	12.565	0.688		9.244	0.496		24.081	0.232								108.612	0.228
	182.833	0.152		1.193	0.207																	13.105	0.73		32.704	0.64		48.475	0.219								2.325	0.318
	61.716	0.117		1.46	0.154																	9.293	0.574		17.912	0.628		20.988	0.23								11.119	0.253
	32.795	0.101		4.036	0.262																	11.498	0.764		20.139	0.462		40.731	0.203								15.082	0.237
	56.105	0.108		1.466	0.607																	24.624	0.761		20.024	0.787		39.311	0.285								46.629	0.181
	67.384	0.128		40.923	0.141																	23.04	0.662		18.259	0.591		20.002	0.247								3.635	0.257
	78.836	0.157		3.673	0.119																	17.583	0.656		24.396	0.581		32.553	0.203								8.613	0.283
	30.54	0.189		2.229	0.172																	18.732	0.66		34.423	0.554		44.46	0.235								2.977	0.198
	204.176	0.155		63.6	0.128																	9.144	0.717		15.256	0.689		23.674	0.266								7.892	0.242
	173.405	0.107		1.21	0.429																	8.79	0.638		17.113	0.519		44.572	0.197								89.636	0.351
	79.068	0.099		2.495	0.171																	8.608	0.547		51.14	0.53		41.26	0.192								3.687	0.246
	54.37	0.102		2.584	0.354																	18.455	0.658		26.825	0.625		36.301	0.198								66.136	0.213
	61.426	0.14		52.511	0.124																	21.353	0.611		19.27	0.633		18.735	0.142								4.116	0.296
	121.812	0.109		65.979	0.143																	24.722	0.659		16.455	0.675		52.268	0.257								25.052	0.214
	377.871	0.145		42.623	0.112																	11.484	0.606		26.577	0.687		11.447	0.191								6.461	0.29
	56.626	0.104		26.398	0.128																	7.275	0.535		18.339	0.719		27.35	0.169								7.924	0.21
	256.117	0.165		52.172	0.123																	11.952	0.696		6.912	0.56		7.429	0.246								3.155	0.248
	99.428	0.137		21.406	0.298																	10.997	0.638		18.465	0.575		26.824	0.187								7.394	0.183
	111.169	0.108		31.277	0.325																	12.439	0.657		20.363	0.957		77.944	0.212								64.929	0.223
	154.607	0.151		13.135	0.123																	24.902	0.603		17.218	0.57		28.937	0.268								20.734	0.24
	45.231	0.105		1.145	0.243																	13.818	0.466		7.709	0.573		37.988	0.191								2.966	0.253
	1107.3	0.152		1.832	0.501																	19.521	0.624		22.12	0.581		37.814	0.188								9.255	0.285
	111.748	0.158		2.14	0.138																	22.293	0.717		14.868	0.563		12.276	0.254								8.321	0.215
	56.626	0.092		32.473	0.151																	14.809	0.481		15.261	0.523		36.351	0.21								9.033	0.189
	72.474	0.101		58.017	0.097																	19.263	0.706		26.228	0.846		52.023	0.221								16.421	0.217
	194.112	0.127		3.51	0.136																	15.749	0.579		15.978	0.711		19.231	0.191								40.17	0.26
	44.017	0.138		1.925	0.423																	16.807	0.59		8.166	0.515		39.255	0.198								9.805	0.204
	324.08	0.162		3.217	0.138																	18.872	0.653		21.117	0.587		12.391	0.265								15.926	0.213
	73.168	0.136		37.441	0.165																	18.869	0.557		5.602	0.658		41.308	0.2								15.792	0.298
	76.407	0.107		1.978	0.214																	15.262	0.608		25.658	0.607		41.718	0.184								50.261	0.241
	73.168	0.126		2.563	0.131																	14.672	0.699		3.689	0.589		15.387	0.223								6.262	0.176
	51.015	0.09		1.627	0.399																	9.214	0.462		15.506	0.694		36.357	0.175								18.834	0.199
	172.422	0.13		35.065	0.17																	17.324	0.523		20.219	0.778		35.095	0.183								4.892	0.221
	53.734	0.153		2.812	0.271																	14.107	0.711		19.921	0.593		36.674	0.215								18.897	0.278
	65.417	0.118		30.129	0.131																	9.816	0.654		20.971	0.673		43.482	0.197								16.406	0.285
	81.034	0.284		14.28	0.153																	17.886	0.693		8.459	0.432		41.803	0.228								14.68	0.172
	55.585	0.131		47.811	0.189																	17.389	0.562		25.228	0.61		11.207	0.325								5.358	0.236
	79.299	0.109		2.766	0.125																	18.557	0.643		17.184	0.623		35.975	0.198								23.193	0.331
	110.591	0.063		3.458	0.231																	18.893	0.703		20.523	0.598		47.328	0.198								7.584	0.184
	51.825	0.037		5.064	0.217																	22.079	0.737		7.312	0.472		3.024	0.368								20.487	0.238
	49.685	0.109		34.74	0.126																	15.582	0.606		41.761	0.598		28.625	152.717								6.703	0.248
	80.745	0.071		12.614	0.172																	17.532	0.681		20.594	0.888		12.374	0.424								7.331	0.235
	65.764	0.093		61.405	0.149																	18.906	0.95		7.971	0.556		6.92	8.528								3.437	0.235
	47.082	0.057		2.588	0.25																	16.968	0.703		17.598	0.6		4.964	0.528								7.804	0.225
	113.251	0.065		7.654	0.153																	15.105	0.572		16.731	0.475		6.747	1.072								11.776	0.235
	44.653	0.031		1.69	0.168																	7.626	0.376		47.634	0.568		6.188	0.639								9.152	0.431
	106.773	0.069		1.18	0.428																	10.962	0.612		9.374	0.514		13.95	0.332								6.642	0.219
	115.97	0.066		43.081	0.145																	17.013	0.587		28.22	0.643		6.309	1.229								4.595	0.278
	69.408	0.19		3.786	0.178																	11.489	0.62		11.406	0.549		14.142	0.315								6.289	0.252
	95.379	0.045		71.817	0.13																	16.591	0.695		9.608	0.545		5.014	0.342								6.756	0.206
	95.321	0.058		2.787	0.244																	15.27	0.716		32.066	0.575		9.097	0.337								9.913	0.264
	124.357	0.072		1.363	0.596																	15.911	0.605		8.18	0.632		14.052	0.56								6.026	0.224
	94.685	0.103		32.024	0.112																	12.65	0.551		12.399	0.635		11.528	3.9								5.742	0.269
	61.831	0.048		5	0.134																	16.149	0.609		6.213	0.473		18.012	0.464								17.064	0.213
	129.331	0.067		8.323	0.213																	15.496	0.76		24.036	0.689		9.968	0.598								7.8	0.209
	115.97	0.071		28.048	0.108																	11.16	0.659		33.689	0.614		8.197	1.362								5.599	0.297
	166.985	0.073		38.354	0.112																	8.477	0.538		18.024	0.907		3.77	0.357								3	0.282
	52.982	0.062		2.18	0.139																	12.474	0.559		12.988	0.553		7.39	4.229								5.611	0.253
	70.912	0.061		7.722	0.253																	16.075	0.785		30.51	0.56		14.358	0.376								4.435	0.217
	74.036	0.091		4.123	0.578																	14.053	0.573		53.682	0.524		30.471	0.288								10.273	0.21
	264.388	0.08		60.707	0.108																	11.857	0.603		12.954	0.589		10.877	0.281								6.793	0.215
	76.812	0.045		9.051	0.198																	7.19	0.532		15.35	0.561		11.064	0.377								12.494	0.27
	101.741	0.065		11.597	0.165																	28.904	4.454		17.32	0.683		4.495	0.914								8.972	0.212
	59.98	0.069		52.387	0.12																	15.405	0.654		21.033	0.733		23.435	0.305								3.522	0.216
	105.096	0.104		47.508	0.113																	15.406	0.485		9.762	0.562		4.712	0.844								5.598	0.263
	80.051	0.087		25.991	0.124																	11.289	0.563		26.805	0.643		10.039	0.271								3.319	0.217
	103.187	0.075		53.857	0.13																	14.66	0.627		17.622	0.593		10.771	0.37								4.796	0.277
	105.212	0.056		21.499	0.154																	10.284	0.605		36.548	0.583		10.369	0.36								3.679	0.233
	117.185	0.075		59.969	0.178																	10.26	0.492		25.694	0.751		10.662	0.365								5.193	0.19
	35.051	0.084		36.865	0.142																	9.36	0.493		17.592	0.886		14.096	0.365								3.892	0.226
	88.149	0.085		10.073	41.485																	9.8	0.681		12.619	0.542		9.674	0.274								4.004	0.211
	46.33	0.121		3.122	11.671																	10.974	0.48		18.644	0.513		25.755	0.624								17.45	0.183
	74.094	0.092		13.577	52.046																	7.898	0.639		11.541	0.674		23.08	0.321								4.511	0.167
	170.282	0.1		15.511	68.958																	9.835	0.709		49.827	0.578		11.458	0.295								1.913	0.196
	49.511	0.105		11.587	44.747																	14.097	0.655		18.521	0.708		9.017	0.276								2.612	0.232
	32.853	0.15		8.696	37.652																	14.039	0.651		61.686	0.645		10.726	0.298								2.567	0.199
	55.238	0.053		9.246	44.193																	15.113	0.481		5.341	0.504		25.979	1.048								4.562	0.257
	31.986	0.139		11.096	47.079																	8.105	0.508		20.108	0.636		10.09	0.328								5.764	0.279
	93.354	0.068		21.582	106.341																	10.132	0.671		26.828	0.58		35.931	0.227								16.531	0.261
	112.037	0.075		9.544	35.835																	9.662	0.484		26.345	0.63		35.405	0.238								11.981	1.658
	113.946	0.074		5.678	27.832																	6.517	0.438		46.105	0.682		8.021	0.287								10.575	45.007
	34.82	0.115		20.965	83.217																	7.414	0.496		12.629	0.721		11.271	0.376								11.817	62.336
	169.993	0.078		10.017	41.581																	11.073	0.573		17.836	1.101		14.849	0.303								15.821	25.547
	42.513	0.102		9.672	44.297																	10.654	0.535		10.847	0.533		22.379	0.249								14.662	25.303
	90.231	0.079		10.997	42.739																	10.023	0.597		16.158	0.515		10.467	0.335								6.489	0.374
	30.424	0.167		12.257	59.957																	7.609	0.574		5.854	0.512		23.252	0.345								8.248	36.384
	41.067	0.085		17.798	73.314																	9.677	0.621		24.149	0.659		9.661	0.473								3.527	0.316
	169.125	0.112		21.629	105.169																	7.309	0.553		22.749	0.525		44.606	0.244								3.348	0.523
	118.573	0.077		14.217	67.122																	12.873	0.53		11.55	0.578		10.1	0.28								5.47	0.673
	33.027	0.047		7.672	27.409																	7.931	0.428		10.728	0.478		9.346	0.918								11.57	46.168
	35.514	0.171		12.884	58.914																	12.125	0.673		15.392	0.651		8.726	0.804								7.711	30.964
	129.042	0.145		5.741	33.668																	8.614	0.415		13.183	0.575		22.609	1.142								14.37	74.313
	59.46	0.585		11.364	47.875																	11.094	0.514		9.047	0.595		13.266	0.324								4.578	0.352
	61.426	0.105		17.098	74.566																	7.911	0.477		14.867	0.614		21.493	0.288								13.302	68.958
	84.389	0.164		1.62	6.308																	23.084	0.61		6.063	0.534		32.466	0.297								3.872	0.468
	127.654	0.083		15.03	72.026																	7.278	0.511		25.07	0.587		37.904	0.268								15.835	66.563
	34.531	0.139		13.139	58.21																	9.375	0.709		24.266	0.501		11.245	0.277								7.286	7.251
	57.146	0.16		23.454	109.261																	6.733	0.48		11.006	0.586		17.033	0.313								3.641	0.474
	148.765	0.098		14.623	63.817																	6.808	0.589		5.784	0.552		16.492	0.286								8.472	5.501
	284.69	0.531		12.077	51.731																	11.046	0.566		32.688	0.703		11.294	0.315								3.57	0.502
	58.534	177.619		13.855	58.179																	6.755	0.566		14.994	0.581		48.895	0.302								11.143	1.365
	64.376	1.827		17.76	30.932																	6.621	0.525		12.741	0.612		8.106	0.548								3.657	5.928
	155.591	0.558		2.218	2.734																	9.913	0.663		14.483	0.554		26.873	0.256								4.334	0.595
	79.935	176.661		3.013	6.138																	7.006	0.754		25.195	0.555		5.482	0.68								7.129	9.098
	160.391	0.699		14.469	54.612																	7.629	0.56		24.976	0.503		25.385	0.298								3.039	0.549
	35.167	224.398		10.498	42.485																	9.681	0.66		18.07	0.592		41.68	0.236								4.677	6.862
	39.389	205.01		2.709	12.653																	9.266	0.664		12.038	0.547		35.326	0.269								3.36	0.512
	221.933	239.788		4.879	21.903																	10.779	0.532		23.536	0.516		53.433	0.27								5.183	0.596
	64.781	0.304		12.547	56.745																	19.84	0.574		21.93	0.665		9.909	0.336								3.259	0.481
	110.128	237.351		11.317	14.281																	12.468	1.317		14.26	0.588		42.402	0.337								11.963	1.23
	106.947	160.745		16.019	68.542																	16.377	0.645		5.721	0.87		23.748	0.241								4.491	0.519
	188.155	1.252		13.066	54.416																	18.103	0.872		15.206	0.592		25.368	1.266								7.638	9.564
	198.45	0.593		12.759	57.731																	16.972	0.623		13.56	0.601		21.139	0.248								3.709	6.231
	137.082	198.647		3.795	0.712																	17.736	0.623		11.078	0.578		12.415	0.339								5.709	8.997
	100.989	190.776		18.296	2.531																	8.577	0.711		11.751	0.556		37.629	0.244								22.257	177.267
	163.515	141.328																				8.758	0.76		21.085	0.573		12.875	0.281								12.514	1.331
	155.764	225.149																				11.744	0.73		15.037	0.692		24.483	0.247								4.413	7.212
	178.38	250.352																				23.118	0.641		20.122	0.54		44.585	0.247								3.857	0.57
	178.842	191.89																				9.356	0.579		11.69	0.499		85.524	0.256								4.396	0.534
	223.09	212.002																				19.889	0.624		10.411	0.527		31.156	0.264								3.183	0.448
	176.818	195.101																				11.825	0.492		16.843	0.54		29.589	0.323								15.321	0.666
	94.858	245.965																				11.548	0.521		19.363	0.465		24.049	0.248								14.209	1.349
	167.564	185.479																				15.382	0.586		6.052	0.574		58.366	0.231								4.091	0.766
	126.786	229.29																				15.223	0.724		19.277	0.607		62.652	0.297								10.237	8.169
	96.189	231.507																				11.39	0.556		29.917	0.543		44.005	0.218								11.512	4.202
	72.879	219.402																				13.54	0.538		5.835	0.603		28.066	0.289								4.007	0.481
																						12.061	0.469		10.703	1.016		29.211	0.484								5.886	5.714
																						12.238	0.527		8.367	0.552		76.511	0.231								20.445	0.754
																						9.895	0.594		18.748	0.54		76.856	0.277								6.754	1.069
																						12.74	0.544		16.686	0.61		25.682	0.293								10.315	6.901
																						14.364	0.514		14.573	0.533		30.208	0.332								16.521	0.67
																						12.779	1.293		14.959	0.609		45.09	0.26								16.83	0.499
																						15.221	0.503		20.83	0.617		17.854	0.357								14.952	0.865
																						22.198	0.534		18.645	0.531		23.678	0.43								13.169	0.66
																						13.817	0.679		10.858	0.54		94.738	0.261								22.175	0.684
																						19.74	0.597		22.147	0.577		26	0.545								16.724	0.675
																						7.851	0.539		4.108	0.714		61.457	0.282								10.475	6.947
																						11.707	0.507		30.119	0.632		86.18	0.194								10.349	0.748
																						12.869	0.52		21.822	0.542		56.599	0.316								14.091	0.716
																						7.979	0.543		4.108	0.604		25.974	0.32								10.788	2.137
																						10.356	0.633		8.048	3.67		88.342	0.302								8.686	8.122
																						11.359	0.652		8.415	4.241		58.584	0.298								12.835	1.561
																						9.424	0.562		46.471	0.327		24.323	0.632								11.944	0.952
																						10.491	0.648		23.089	0.378		50.865	0.28								10.391	7.742
																						10.389	0.839		37.468	0.388		52.209	0.263								15.495	0.957
																						12.887	0.569		13.283	2.868		101.112	0.271								19.935	1.451
																						6.344	0.517		50.126	0.302		27.561	0.485								13.065	0.879
																						12.336	0.685		8.877	4.647		100.192	0.307								14.239	0.74
																						12.578	0.603		14.818	0.315		37.19	0.249								16.33	0.683
																						12.137	0.494		45.052	0.26		24.588	0.252								21.205	1.324
																						11.922	0.781		25.239	0.273		82.053	0.308								20.718	0.806
																						10.783	0.464		40.419	0.385		61.952	0.275								17.174	1.159
																						13.153	0.546		26.164	0.272		45.401	0.23
																									18.788	0.324		39.482	0.354
																									15.336	0.287		97.177	0.29
																									24.373	1.459		23.925	0.301
																									12.471	2.444		104.59	0.274
																									33.599	0.348		53.491	0.32
																									22.856	0.3		61.521	0.244
																									24.751	0.354		30.398	0.348
																									26.15	0.292		59.63	0.245
																									24.397	0.32		51.75	0.28
																									21.44	0.351		61.144	0.289
																									7.671	3.093		17.155	0.615
																									14.991	0.371		37.115	0.28
																									16.979	0.318		96.579	0.304
																									12.578	0.28		28.609	0.175
																									27.567	2.734		82.158	0.297
																									19.853	0.246		30.653	0.323
																									17.707	0.215		36.949	0.245
																									28.76	0.445		27.56	0.582
																									49.546	0.313		34.875	0.288
																									37.532	0.256		58.285	0.287
																									24.986	0.281		49.175	0.316
																									35.773	0.352		77.112	0.235
																									21.755	0.346		28.679	0.343
																									7.921	3.149		68.1	0.235
																									48.94	0.284		38.335	0.249
																									13.76	0.292		46.016	0.24
																									9.531	0.287		26.846	0.26
																									21.649	0.295		29.096	0.668
																									28.118	0.264		60.517	0.288
																									20.267	0.27		44.213	0.306
																									33.798	0.306		36.176	0.393
																									18.665	0.269		67.144	0.419
																									49.732	0.29		75.671	0.359
																									27.883	0.246		57.198	0.278
																									15.81	0.285		72.966	0.275
																									29.203	0.29		60.745	0.295
																									13.569	0.316		37.029	0.922
																									21.989	0.346		55.772	0.245
																									25.471	0.269		26.874	0.343
																									39.605	0.26		47.72	0.398
																									22.04	0.343		65.355	0.305
																									39.393	0.264		34.979	0.819
																									47.169	0.257		61.871	0.28
																									39.328	0.205		27.043	0.505
																									28.139	0.27		54.219	0.253
																									31.984	0.319		43.293	0.322
																									22.94	0.267		35.567	0.444
																									17.841	0.255		71.619	0.312
																									4.566	0.171		48.834	0.29
																									24.096	0.407		31.072	0.311
																									35.192	0.222		24.654	0.582
																									22.628	0.287		66.17	0.272
																									25.847	0.237		10.213	0.31
																									28.855	0.304		39.173	0.384
																									14.85	0.212		39.012	0.454
																									27.835	0.233		32.914	0.455
																									41.515	0.245		67.569	0.36
																									23.148	0.338		49.231	0.366
																									46.012	0.378		43.081	0.531
																									26.948	0.276		33.965	0.431
																									42.659	0.452		41.959	0.485
																									32.968	0.338		33.017	0.365
																									28.577	0.245		71.918	0.413
																									27.2	0.237		35.026	0.261
																									28.83	0.29		16.594	0.654
																									34.228	0.343		60.259	0.307
																									14.609	0.251		24.408	0.489
																									37.447	0.614		68.04	0.321
																									25.108	0.23		49.376	0.367
																									43.018	0.644		69.745	0.386
																									35.609	0.69		51.173	0.306
																									35.058	1.012		45.47	0.461
																									31.617	0.958		24.851	0.294
																									34.06	0.678		29.577	0.318
																									4.894	0.312		63.867	0.293
																									31.299	0.211		58.356	0.265
																									50.78	0.258		58.814	0.369
																									24.011	0.229		78.308	0.348
																									23.082	0.246		72.869	0.447
																									21.109	0.582		48.921	0.277
																									40.321	0.255		52.822	0.318
																									17.324	3.107		25.238	0.517
																									14.798	3.826		82.73	0.354
																									60.689	0.254		22.721	0.417
																									20.362	0.301		53.912	0.31
																									68.553	0.241		45.219	0.367
																									43.726	0.246		38.676	0.356
																									48.122	0.249		77.611	0.514
																									47.89	0.268		57.764	0.28
																									67.228	0.228		64.207	0.29
																									9.134	0.285		61.892	0.278
																									54.46	0.265		51.427	0.42
																									68.168	0.213		56.678	0.294
																									55.118	0.379		79.836	0.443
																									48.124	0.234		44.686	0.322
																									21.578	0.314		73.071	0.317
																									28.614	0.839		48.754	0.289
																									32.539	0.267		84.3	0.348
																									39.669	0.283		81.387	0.428
																									41.338	0.256		66.41	0.314
																									47.355	0.249		73.927	0.281
																									44.797	0.256		32.917	0.272
																									42.064	0.237		79.071	0.292
																									47.479	0.342		72.315	0.3
																									46.98	0.275		67.759	0.313
																									57.57	0.853		60.569	0.294
																									23.46	0.262		76.529	0.344
																									40.941	0.325		67.745	0.302
																									10.403	0.227		30.514	0.253
																									37.47	0.362		37.936	0.36
																									33.192	0.289		66.927	0.324
																									31.899	0.324		57.123	0.283
																									7.897	0.269		51.462	0.331
																									18.994	0.225		97.373	0.493
																									11.764	0.336		80.18	0.325
																									15.689	0.353		55.668	0.297
																									2.523	0.189		60.862	0.346
																									11.383	0.189		40.309	0.42
																									27.594	0.238		68.306	0.319
																									9.751	0.321		45.212	0.366
																									16.586	0.239		35.939	0.311
																									44.757	0.235		16.374	0.362
																									19.736	0.361		20.29	0.302
																									19.889	0.331		81.925	0.267
																									8.041	0.548		59.768	0.285
																									11.903	0.428		45.597	0.277
																												17.121	0.512
																												18.476	0.383
																												33.316	0.37
																												84.27	0.291
																												96.893	0.444
																												70.322	0.293
																												45.15	0.325
																												42.219	0.35
																												69.703	0.351
																												16.788	0.461
																												33.744	0.375
																												7.064	0.447
																												68.533	0.324
																												6.987	0.598
																												43.164	0.321
																												21.129	0.358
																												43.534	0.302
																												54.646	0.371
																												35.97	0.64
																												53.788	0.316
																												37.411	0.367
																												22.945	0.295
																												42.745	0.349
																												13.325	0.358
																												42.083	0.296
																												40.477	0.427
																												9.846	1.339
																												46.001	0.313
																												8.676	0.177
																												19.341	0.168
																												28.725	0.231
																												4.055	0.289
																												11.572	0.225
																												5.863	0.169
																												5.867	0.139
																												7.013	0.208
																												3.111	0.151
																												2.209	0.141
																												3.715	0.151
																												14.907	0.171
																												3.157	0.22
																												12.014	0.346
																												11.348	0.162
																												11.129	0.195
																												10.594	0.189
																												9.353	0.19
																												4.876	0.741
																												5.849	0.94
																												17.678	0.203
																												12.284	0.161
																												17.906	0.194
																												9.719	0.144
																												6.553	0.293
																												6.556	0.347
																												12.654	0.32
																												5.498	0.118
																												8.646	0.227
																												7.279	0.527
																												3.389	0.198
																												13.24	0.17
																												10.317	0.251
																												7.455	0.766
																												18.725	0.158
																												3.257	0.272
																												3.102	0.263
																												14.941	0.179
																												7.451	0.212
																												13.78	0.157
																												11.409	1.786
																												14.716	0.207
																												11.62	0.199
																												12.341	0.213
																												12.627	1.907
																												9.733	0.259
																												22.474	0.208
																												17.422	0.228
																												13.984	0.346
																												28.212	0.222
																												15.047	0.212
																												17.365	0.178
																												18.779	0.199
																												21.106	0.174
																												29.806	0.194
																												53.619	0.227
																												44.883	0.172
																												21.14	0.173
																												17.046	0.25
																												51.101	0.139
[truncated: 7 more columns]

## Sheet: F1FS1E
Fluorescence intensity analysis of SOX2 and SOX17 in second screen using Fiji
units= fluorescence intensity (a.u.)
Average fluorescence intensity (A.U.)	36.8646	6.11859		41.2992	9.687		10.6606	30.0653		8.40172	50.5992		18.0483	24.7817		9.81846	94.641
Standard Deviation	19.8156	32.3833		17.4117	38.3516		14.369	21.4946		8.27625	53.8643		15.9357	52.0114		6.70119	73.0069
1	SOX2	SOX17	2	SOX2	SOX17	3	SOX2	SOX17	4	SOX2	SOX17	5	SOX2	SOX17	6	SOX2	SOX17
	15.627	0.079		6.269	103.814		10.232	1.428		0.679	0.075		6.071	10.67		5.26	79.904
	9.737	0.063		6.999	122.792		12.068	40.217		3.673	61.373		0.971	0.124		7.34	117.57
	21.98	0.06		46.847	0.154		10.005	36.315		9.236	126.933		1.028	0.113		9.157	164.773
	12.074	0.076		4.777	82.466		9.305	61.842		3.777	46.776		1.199	0.058		3.916	54.107
	17.511	0.046		42.382	0.252		10.145	39.62		7.928	121.827		1.117	0.117		8.05	134.82
	18.672	0.037		41	0.162		7.476	52.991		3.616	58.029		7.802	151.978		14.687	225.63
	18.404	0.057		6.465	107.933		9.599	77.677		3.839	70.691		9.027	150.811		8.705	157.482
	14.464	0.074		43.298	0.193		8.054	64.082		0.408	0.083		0.897	0.1		14.133	130.753
	16.895	0.051		8.342	140.777		9.145	74.33		5.376	97.495		8.046	131.008		28.78	1.381
	18.936	0.035		50.47	0.156		8.417	65.356		1.075	14.007		24.013	249.996		10.202	182.693
	18.871	0.072		36.584	0.135		9.489	37.687		3.798	46.696		21.66	243.937		8.843	153.759
	14.43	0.065		30.049	0.264		14.992	32.477		0.939	1.227		5.998	57.019		9.526	167.805
	21.165	0.058		5.188	94.132		6.624	41.848		4.994	95.035		1.696	0.27		1.341	2.127
	22.218	0.033		63.319	0.105		6.689	45.307		2.061	34.09		25.67	0.222		9.732	162.388
	17.934	0.059		17.91	0.117		7.653	34.616		2.356	42.174		1.84	0.159		2.232	0.51
	20.566	0.056		48.082	0.425		11.306	59.172		4.533	89.168		0.958	1.265		8.882	143.299
	14.083	0.056		40.483	0.124		12.546	82.188		4.276	79.79		28.869	1.269		9.17	154.744
	16.15	0.045		41.803	0.102		8.206	62.863		2.248	41.783		37.096	1.412		1.939	2.894
	17.427	0.034		53.086	0.373		6.483	42.377		4.449	84.136		1.125	0.155		8.941	156.41
	6.271	0.419		48.213	0.075		10.424	42.859		3.706	67.894		60.695	0.094		11.8	205.659
	17.465	0.077		4.325	83.312		5.113	32.667		4.085	75.304		20.456	0.15		19.41	0.411
	11.358	0.07		27.551	0.373		13.6	55.596		4.287	74.514		1.138	0.122		8.89	154.186
	14.314	0.057		32.532	0.169		8.636	45.947		0.819	1.086		44.595	0.28		7.59	127.568
	14.283	0.179		32.899	0.432		22.668	49.218		2.457	39.28		1.309	0.129		12.344	210.138
	11.994	0.09		46.844	0.147		8.128	49.508		4.221	79.541		1.471	0.175		10.942	196.309
	19.415	0.177		48.965	0.106		6.762	46.638		5.897	113.43		33.893	0.112		9.536	158.739
	22.127	0.351		43.779	0.149		12.167	84.735		4.366	87.29		39.802	0.125		6.905	125.342
	19.224	0.052		19.315	0.112		10.208	39.792		3.737	75.031		39.741	0.226		6.879	109.783
	17.633	0.039		38.5	0.17		6.566	39.775		4.621	90.007		42.018	0.102		8.004	131.552
	18.701	0.059		44.783	0.095		8.419	47.357		3.138	56.465		37.076	0.131		10.491	182.324
	16.634	0.059		49.15	0.122		8.603	68.313		6.642	134.976		0.929	0.26		9.036	169.334
	18.867	0.109		41.951	0.328		14.895	52.537		2.03	40.389		67.981	0.111		7.993	142.513
	13.071	0.385		48.361	0.126		6.329	47.509		2.211	39.532		41.745	0.138		10.436	175.994
	21.33	0.112		41.363	0.379		21.044	46.655		3.969	72.417		16.082	0.126		8.981	152.947
	22.598	0.22		55.964	0.151		2.257	23.502		3.25	58.372		13.035	0.146		9.455	153.791
	15.645	0.044		27.056	0.21		2.158	26.043		1.544	0.698		45.347	0.109		10.36	162.898
	20.48	0.13		33.708	0.12		2.06	24.2		6.98	147.138		40.745	0.111		10.393	170.57
	26.627	0.129		46.126	0.126		4.159	55.981		7.66	157.141		1.336	0.153		11.571	190.453
	16.527	0.069		28.012	0.115		2.356	26.575		5.038	102.298		41.815	0.107		7.136	91.83
	19.295	0.065		41.702	1.013		2.202	29.199		2.261	40.078		68.92	0.116		6.753	106.617
	17.309	0.066		0.758	0.096		2.04	24		2.737	51.451		61.838	0.116		7.854	138.259
	18.54	0.107		31.914	0.145		2.342	27.357		0.535	0.303		1.128	0.639		9.899	165.457
	22.61	0.088		20.666	0.396		2.24	27.934		3.47	60.829		57.618	0.139		6.472	104.508
	23.439	0.078		2.119	0.397		2.399	26.761		0.633	0.749		40.457	0.087		8.803	148.803
	23.753	0.224		1.034	0.088		2.295	27.554		0.475	0.197		46.867	0.113		8.204	139.061
	16.059	0.062		45.801	0.789		2.807	33.538		2.331	42.557		0.942	0.319		6.565	88.963
	19.63	0.081		70.351	2.417		2.95	31.441		3.925	73.542		57.968	0.101		6.194	90.943
	17.607	0.083		59.28	2.14		2.178	22.787		3.843	76.574		33.846	0.136		6.691	96.141
	10.836	0.066		14.796	207.98		3.007	1.343		0.881	0.413		33.345	0.133		10.484	177.718
	18.99	0.094		54.041	0.129		1.946	21.556		0.591	0.414		13.432	0.088		6.346	86.778
	14.864	0.322		18.878	242.614		2.205	25.226		0.627	0.173		44.62	0.118		9.369	148.511
	15.046	0.095		55.904	0.108		2.568	37.454		0.76	0.099		26.71	0.142		9.318	157.755
	14.985	0.081		50.991	0.127		2.29	26.381		2.88	0.411		1.031	0.274		14.086	190.251
	28.41	0.212		65.076	0.125		3.28	37.092		4.373	81.025		44.909	0.114		13.563	180.189
	18.111	0.074		53.35	0.19		2.607	29.572		4.891	89.119		1.016	0.173		11.284	182.205
	17.537	0.072		73.935	0.106		2.683	35.298		3.506	68.545		39.007	0.136		12.915	174.246
	19.534	0.087		45.186	0.781		1.898	23.606		1.67	34.411		39.209	0.091		8.246	131.377
	9.876	0.05		57.982	0.242		2.537	28.82		1.682	34.953		1.247	0.32		8.633	146.966
	24.491	0.086		53.29	0.152		2.468	28.615		5.072	94.004		0.984	0.288		9.576	142.96
	19.881	0.06		67.064	0.113		2.185	27.395		3.435	58.715		19.127	0.169		13.052	209.374
	14.358	0.432		66.433	0.106		2.893	37.418		1.768	35.818		1.016	0.311		8.472	127.159
	5.455	0.134		18.487	206.63		2.185	23.523		3.591	65.221		1.343	0.147		8.027	138.779
	14.885	0.113		66.119	0.127		1.802	22.294		3.657	71.836		0.899	0.202		4.847	66.802
	13.267	0.097		68.854	0.113		3.473	40.897		4.275	85.06		0.53	0.106		12.019	210.721
	21.106	0.069		72.043	0.141		3.496	36.224		0.6	0.186		1.336	0.107		9.171	158.519
	4.625	0.107		52.707	0.214		1.83	19.412		3.801	67.74		1.055	0.18		9.238	158.191
	17.734	0.087		55.023	0.158		2.979	38.33		3.259	61.384		0.845	0.256		11.423	194.305
	18.055	0.054		54.176	0.125		4.057	57.004		5.684	90.52		49.632	0.112		13.401	139.761
	14.298	0.111		68.006	0.111		2.419	25.097		0.799	14.501		49.828	0.09		9.105	152.29
	16.624	0.088		53.612	0.133		6.628	20.635		5.888	102.531		47.965	0.054		12.592	198.606
	5.376	0.068		44.775	0.13		1.773	20.522		3.38	65.559		33.675	0.055		11.704	201.833
	23.679	0.056		47.182	0.113		3.084	38.682		5.399	104.027		39.612	0.096		8.017	110.331
	3.266	0.111		50.335	0.158		2.757	31.077		0.45	0.104		48.232	0.107		8.115	109.809
	9.407	0.175		38.619	0.108		3.386	30.484		0.525	0.098		50.657	0.091		14.595	214.757
	19.958	0.08		37.949	0.106		5.421	75.171		0.696	0.189		45.722	0.077		17.22	227.67
	19.343	0.105		39.918	0.126		2.517	31.012		3.557	68.534		0.75	0.217		10.869	176.24
	18.31	0.03		42.949	0.111		2.978	34.208		3.098	58.199		41.581	0.117		11.431	171.901
	13.827	0.071		42.752	0.139		1.943	16.939		3.271	65.133		41.361	0.069		14.304	215.472
	16.719	0.094		51.337	0.117		3.04	41.646		6.07	123.854		51.781	0.078		14.25	219.33
	19.668	0.075		31.042	0.13		1.769	15.935		0.293	0.202		9.35	149.613		11.486	195.985
	12.957	0.051		48.98	0.127		3.186	38.39		2.994	49.938		42.866	0.16		6.951	101.042
	13.017	0.102		61.73	0.106		3.168	44.142		2.284	42.248		44.67	0.117		13.924	216.878
	19.315	0.074		42.88	0.124		2.778	29.794		0.397	0.189		32.595	0.094		12.231	196.421
	17.842	0.071		48.832	0.064		2.456	19.262		4.325	85.681		39.54	0.087		5.552	74.464
	16.907	0.133		40.427	0.139		2.682	37.333		0.776	0.111		0.768	0.125		7.973	131.407
	22.113	0.111		54.148	0.124		2.653	38.081		2.547	36.459		56.944	0.082		24.915	0.218
	12.387	0.229		43.596	0.154		3.052	38.101		3.118	56.491		36.335	0.089		15.259	0.901
	14.746	0.075		41.132	0.154		3.777	46.251		1.265	0.922		32.576	0.204		23.847	0.5
	17.655	0.073		63.663	0.11		1.901	21.986		0.46	0.148		49.264	0.096		22.223	0.36
	12.314	0.085		39.518	0.139		1.7	19.883		3.059	60.529		9.022	152.019		15.927	0.363
	7.209	0.081		21.934	0.174		10.377	53.948		0.429	0.195		35.78	0.164		25.598	0.366
	12.862	0.118		52.857	0.139		18.972	50.856		0.521	0.166		0.828	0.088		23.933	0.283
	16.418	0.152		55.976	0.164		6.386	38.935		2.909	47.074		47.587	0.218		18.85	0.261
	5.077	0.423		53.485	0.146		6.844	36.618		2.671	30.404		48.371	0.161		21.13	0.782
	16.664	0.057		7.402	127.724		12.473	56.072		0.508	0.822		42.872	0.082		24.666	0.334
	24.083	0.066		49.108	0.17		9.119	51.748		0.399	0.25		37.267	0.111		33.396	0.485
	18.663	0.074		45.835	0.12		13.68	58.022		0.385	0.355		39.843	0.096		10.259	152.464
	19.928	0.074		33.157	0.168		19.715	41.808		0.575	0.403		8.946	140.552		14.817	0.923
	16.214	0.052		46.777	0.198		8.408	50.938		6.755	130.852		54.522	0.245		22.279	0.298
	15.792	0.051		42.855	0.153		9.707	38.338		0.497	0.111		50.541	0.131		25.242	0.34
	13.489	0.084		41.348	0.161		12.094	82.585		2.003	37.177		47.184	0.091		17.912	0.325
	14.623	0.071		42.701	0.188		8.942	51.553		0.666	0.151		1.228	0.411		24.101	0.44
	15.226	0.075		64.87	0.099		8.059	45.263		1.768	32.29		42.139	0.167		9.448	137.909
	18.688	0.06		42.774	0.211		8.723	54.063		0.323	0.163		8.036	149.027		16.166	0.32
	17.717	0.1		47.3	0.217		13.922	55.262		6.675	134.018		45.866	0.132		31.662	0.303
	17.999	0.081		49.49	0.116		17.268	44.05		3.784	73.554		1.039	0.485		7.145	36.106
	9.732	0.112		52.867	0.121		8.485	45.512		0.554	0.161		41.878	0.117		8.274	72.895
	3.689	0.275		56.184	0.188		10.062	52.164		2.665	49.91		49.453	0.175		14.231	2.332
	21.559	0.048		49.262	0.123		9.284	52.827		2.849	49.658		9.348	152.319		8.738	41.158
	18.925	0.096		53.686	0.15		12.662	49.079		0.468	0.693		1.087	1.731		30.48	0.453
	25.967	0.074		47.162	0.183		33.231	86.581		3.621	51.055		42.902	0.164		13.734	0.414
	24.268	0.114		45.714	0.166		11.183	70.98		3.497	51.187		54.472	0.108		34.205	0.171
	10.772	0.062		42.933	0.112		12.407	84.516		3.474	70.027		45.347	0.164		16.161	0.104
	16.699	0.092		49.26	0.166		9.944	47.788		0.528	0.33		62.476	0.2		14.338	167.501
	15.852	0.122		47.962	0.213		13.65	46.506		0.659	0.068		1.309	0.196		11.323	136.444
	23.545	0.06		51.255	0.142		16.201	53.166		5.566	90.956		49.763	0.176		23.86	0.469
	6.727	0.086		19.117	0.116		7.503	40.405		4.503	88.443		46.177	0.152		12.227	212.72
	2.749	0.064		49.704	0.1		13.671	45.429		1.085	3.045		15.517	232.657		20.375	0.476
	10.929	0.095		48.719	0.131		13.877	61.056		8.325	131.015		1.108	4.808		29.859	0.74
	11.605	0.119		64.568	24.034		40.855	89.083		7.832	138.028		52.391	0.214		12.767	146.328
	10.391	0.059		37.325	0.198		47.437	0.427		6.36	110.69		42.76	0.224		9.884	169.358
	17.554	0.066		52.525	0.121		41.445	0.373		8.466	138.598		43.441	0.267		20.009	0.138
	22.092	0.103		60.438	0.106		33.304	0.505		3.185	52.443		39.834	0.242		17.498	0.427
	22.431	0.092		44.731	0.172		17.055	2.178		2.319	27.73		25.094	0.23		23.03	0.113
	18.486	0.054		29.766	0.146		37.161	0.593		4.115	60.893		60.045	0.315		7.001	22.132
	4.946	0.178		61.217	0.175		42.957	0.361		5.67	73.575		11.546	193.947		8.273	134.61
	9.166	0.053		39.254	0.253		65.312	0.396		10.806	173.376		47.169	0.61		7.355	126.289
	24.822	0.11		45.323	0.155		50.286	0.385		1.526	5.293		53.91	0.662		24.152	226.687
	8.474	0.154		58.288	0.14		44.196	0.514		6.52	126.521		61.362	0.534		15.055	0.594
	21.21	0.157		58.294	0.132		56.283	0.432		7.108	0.403		49.626	0.325		10	153.925
	21.96	0.079		48.659	0.129		46.443	0.509		1.273	7.763		55.87	0.416		10.435	128.441
	27.038	0.08		56.629	0.107		48.166	0.419		22.081	0.104		14.433	220.001		10.235	173.582
	5.275	0.07		35.836	0.122		59.044	0.402		6.826	120.694		50.942	0.339		26.678	0.142
	7.489	0.068		51.567	0.145		56.651	0.475		1.041	0.158		56.074	0.885		11.795	193.133
	1.943	0.061		45.655	0.248		44.063	0.566		10.542	144.5		54.761	0.631		9.012	131.02
	7.81	0.089		37.205	0.125		52.839	0.458		7.436	139.358		9.411	153.758		12.069	193.61
	3.629	0.104		25.448	0.082		30.981	0.548		5.52	89.85		10.097	170.706		10.655	113.396
	31.273	0.134		44.54	0.765		32.861	0.567		8.893	134.533		8.839	158.367		34.629	0.118
	15.169	0.162		53.113	0.097		46.148	0.441		4.495	66.724		6.211	90.998		28.792	0.128
	4.88	0.084		8.591	141.78		40.948	0.557		5.271	84.337		0.831	0.272		8.108	76.546
	33.369	0.139		53.378	0.136		13.772	0.617		7.007	119.499		1.04	0.368		13.121	8.611
	10.342	0.064		51.608	0.138		68.789	0.466		1.354	0.121		20.184	234.462		7.698	74.752
	7.861	0.096		53.98	0.119		70.356	0.491		20.479	234.621		6.837	65.279		7.541	122.411
	27.421	0.455		61.331	0.162		38.3	0.486		7.307	126.429		9.917	122.385		14.32	0.757
	14.319	0.397		65.959	0.145		62.367	0.416		21.592	2.499		5.141	52.855		6.595	101.802
	29.776	0.135		59.437	0.202		44.61	0.673		0.9	0.091		11.733	0.301		11.308	180.784
	7.376	0.257		52.186	0.388		31.192	0.533		1.665	13.717		53.104	0.116		30.85	1.677
	27.15	0.247		57.568	0.142		47.511	0.496		1.003	0.111		4.711	62.639		7.778	122.496
	6.504	0.257		42.752	0.234		54.491	0.357		21.563	0.675		40.624	0.168		7.97	126.532
	23.992	1.012		30.594	0.202		39.82	0.606		13.83	14.886		65.548	0.085		10.483	169.598
	10.15	139.471		39.132	0.475		51.523	0.477		11.895	209.259		55.363	0.089		12.713	99.131
	6.093	5.525		10.005	173.439		48.663	0.42		17.599	228.319		7.345	128.053		11.846	200.822
	11.968	0.371		7.489	125.441		38.951	0.62		0.99	0.104		60.133	0.086		13.719	216.909
	11.223	0.117		46.295	0.218		52.957	0.457		24.01	0.105		49.576	0.188		11.829	187.732
	5.258	3.05		68.963	0.135		61.24	0.437		25.462	0.133		70.861	0.106		9.01	144.686
	6.522	83.707		85.806	0.12		7.133	0.914		28.766	0.082		5.618	76.503		11.664	185.755
	11.747	0.118		73.706	0.108		10.616	0.541		14.262	0.145		15.675	229.159		16.607	0.127
	6.263	0.821		63.088	0.148		58.436	0.476		7.355	126.649		73.164	0.112		38.467	0.893
	6.097	81.936		48.116	0.121		37.836	0.542		16.699	9.559		12.431	197.895		12.376	195.934
	5.297	72.834		46.755	0.189		48.06	0.433		20.776	0.092		57.303	0.105		15.597	222.416
	7.937	0.187		30.389	0.187		37.089	0.714		14.144	0.168		56.224	0.106		13.269	218.617
	23.769	0.246		55.339	0.2		8.514	31.542		11.227	195.997		65.017	0.073		12.276	205.05
	30.556	0.538		55.067	0.213		5.043	29.814		6.269	110.216		49.594	0.191		11.167	192.184
	28.195	0.489		39.481	0.203		18.135	39.384		6.206	113.01		54.469	0.104		12.265	203.935
	11.789	0.213		45.207	0.234		5.758	39.636		22.389	0.121		7.247	103.949		11.825	199.546
	18.857	0.172		54.469	0.149		6.279	44.047		1.721	0.17		15.178	223.145		10.599	136.881
	38.569	1.394		42.816	0.195		10.759	62.155		30.239	0.099		43.33	0.083		14.954	211.28
	24.991	0.583		48.645	0.143		6.07	34.725		19.552	0.089		19.045	0.297		10.753	176.462
	44.542	0.83		43.936	0.254		8.839	32.98		1.016	0.115		60.809	0.127		12.341	197.623
	28.493	0.479		52.071	0.202		8.189	58.602		28.621	2.602		69.912	0.091		11.63	158.827
	19.895	0.28		36.301	0.186		6.749	44.175		28.35	0.076		54.196	0.088		10.613	168.533
	24.921	0.439		42.341	0.158		16.578	36.285		2.125	19.331		43.897	0.098		1.533	0.634
	38.317	0.192		45.627	0.417		9.139	40.235		10.976	0.082		54.336	0.087		1.564	0.143
	23.738	0.853		40.565	0.146		7.035	40.828		6.153	0.063		10.826	177.42		11.162	188.448
	40.146	0.43		45.463	0.336		5.807	45.278		21.187	0.125		14.017	209.534		11.568	192.666
	1.808	0.719		56.732	0.204		5.299	39.243		13.256	0.089		43.356	0.088		12.332	195.289
	27.911	0.109		34.502	0.143		31.128	84.822		28.957	0.103		55.758	0.086		8.517	133.215
	26.11	0.097		50.209	0.291		9.277	22.428		17.831	0.1		49.187	0.069		12.107	156.341
	26.477	0.785		47.604	0.16		7.184	45.904		5.151	72.764		44.334	0.083		10.706	184.173
	31.509	0.088		48.394	0.234		11.29	77.496		7.989	99.514		55.339	0.104		11.894	187.502
	22.012	2.126		51.627	0.43		10.69	69.998		8.897	79.801		43.54	0.086		7.39	144.205
	18.641	0.117		62.143	0.163		8.136	40.488		4.601	76.141		46.66	0.07		8.987	158.219
	2.289	0.272		49.454	0.281		7.656	59.948		4.897	79.605		14.148	223.123		5.421	92.849
	10.176	147.837		54.552	0.227		15.831	51.767		18.956	0.711		40.962	0.108		12.262	203.932
	1.146	0.116		55.627	0.182		6.841	30.685		8.61	160.382		55.638	0.072		12.126	198.548
	8.126	127.915		58.611	0.146		13.849	29.402		28.07	0.158		47.056	0.107		7.366	134.192
	9.494	0.117		46.052	0.231		6.891	55.225		24.79	0.247		54.293	0.104		5.588	84.832
	32.951	0.104		55.589	0.178		7.419	22.093		9.715	177.87		48.205	0.089		6.833	115.349
	0.719	0.118		49.585	0.163		2.131	15.192		28.023	0.694		50.261	0.078		11.835	200.882
	2.807	0.111		46.236	0.238		8.765	15.117		28.598	1.051		18.914	240.494		6.658	105.933
	31.099	0.102		40.23	0.192		2.797	31.756		8.659	164.087		52.218	0.051		9.309	165.217
	37.467	0.137		50.1	0.259		3.588	46.23		17.369	2.592		66.305	0.087		11.17	186.749
	27.546	1.337		60.701	0.209		2.781	30.857		35.69	0.339		52.206	0.082		11.572	197.386
	34.476	0.131		48.801	0.162		1.654	11.989		10.626	0.168		51.933	0.05		8.608	155.084
	32.266	0.044		54.207	0.261		1.551	13.625		3.961	24.972		55.735	0.073		6.688	110.463
	16.211	0.109		56.119	0.161		1.811	16.284		15.711	2.429		0.967	0.115		8.314	137.924
	42.351	0.094		42.528	0.263		2.778	33.285		8.15	159.117		0.901	0.389		9.32	163.246
	1.246	0.204		65.332	0.26		3.744	45.905		24.521	3.007		0.756	0.117		7.899	132.082
	27.031	0.122		45.182	0.189		3.325	35.153		5.983	114.915		0.657	0.11		11.316	197.329
	27.49	0.104		48.763	0.19		2.039	24.426		11.283	0.278		6.949	105.917		6.256	95.421
	34.961	0.075		35.422	0.161		2.717	15.443		28.133	0.093		0.928	0.078		8.655	153.204
	35.836	0.14		57.44	0.214		3.226	40.356		5.336	80.867		14.64	0.98		8.23	143.628
	19.79	0.112		58.038	0.131		2.603	29.952		9.604	54.664		21.59	0.473		8.752	166.412
	20.405	0.149		45.176	0.184		4.42	51.201		18.587	0.048		0.796	0.108		6.352	114.46
	33.189	0.109		49.372	0.23		2.19	27.432		19.943	0.135		0.973	0.143		8.812	145.947
	27.075	0.108		41.266	0.172		3.433	44.534		17.025	0.153		0.927	0.147		26.895	0.171
	23.246	0.073		41.337	0.274		2.553	25.754		17.818	0.091		1.302	0.169		9.181	151.289
	30.054	0.093		53.428	0.171		2.313	23.404		25.31	0.299		0.889	0.115		12.082	88.042
	20.344	0.14		52.151	0.463		1.379	0.388		27.066	0.137		5.699	86.164		6.372	120.466
	20.994	0.193		51.133	0.294		2.879	35.082		23.119	0.124		1.96	0.137		8.232	151.092
	51.09	0.096		53.97	0.197		3.096	36.239		27.497	0.259		0.809	0.089		7.938	131.632
	34.603	0.103		43.616	0.291		3.441	33.429		12.799	0.075		14.447	7.356		27.548	0.171
	3.846	0.193		63.939	0.233		3.518	37.097		6.384	105.566		1.01	2.897		21.353	0.138
	31.049	0.113		36.782	0.231		2.263	0.435		5.179	92.711		1.237	0.126		6.769	114.721
	20.461	0.141		62.375	0.791		2.825	35.882		5.01	85.612		7.344	122.848		9.035	152.568
	31.277	0.109		50.65	0.601		2.895	36.289		34.762	0.953		1.218	0.144		11.653	189.851
	29.962	0.129		53.314	0.334		2.205	26.648		31.892	0.11		28.86	0.763		9.501	162.869
	27.009	0.415		50.867	0.388		2.157	23.334		6.083	125.648		19.767	5.923		8.771	144.947
	22.286	0.105		51.005	0.235		2.61	33.705		7.851	141.355		0.928	0.099		10.834	185.894
	31.863	0.205		52.658	0.688		3.753	45.055		10.499	189.701		14.126	0.545		23.728	219.688
	35.599	0.096		27.254	0.221		1.526	5.568		3.114	41.394		20.746	0.32		10.912	175.177
	29.262	0.161		57.124	0.221		3.272	34.805		6.48	88.739		1.073	0.126		25.007	0.902
	27.547	0.103		49.933	0.273		3.153	15.028		6.572	105.414		0.777	0.084		11.383	8.226
	32.676	0.156		44.898	0.345		1.245	11.11		0.694	0.096		0.732	0.101		11.282	178.208
	31.697	0.102		56.999	0.464		1.477	18.503		0.74	0.123		0.938	2.469		11.19	8.754
	37.051	0.148		53.174	0.217		1.786	18.699		8.797	165.534		0.984	0.094		8.017	131.321
	40.585	0.071		37.266	0.238		2.826	17.818		8.66	0.066		0.979	0.141		6.516	110.77
	21.739	0.114		36.225	0.254		1.806	24.888		16.38	0.085		0.949	0.108		13.911	207.808
	1.347	0.168		59.836	0.658		1.703	20.588		13.68	0.088		0.732	0.095		1.156	0.494
	28.504	0.112		54.369	0.227		1.199	1.046		33.304	0.1		23.139	0.401		8.378	144.786
	33.615	0.125		63.19	0.71		1.312	13.443		22.424	0.147		7.438	120.805		0.9	0.598
	16.303	0.148		52.722	0.196		1.473	16.105		7.972	0.059		1.124	0.157		6.304	106.893
	30.269	0.084		63.047	0.397		1.622	23.039		22.233	0.11		23.433	0.344		7.773	130.975
	34.093	0.09		42.45	0.289		2.121	20.169		14.876	0.064		0.899	0.129		7.908	134.203
	27.453	0.087		55.278	0.566		1.073	10.885		29.409	0.075		0.729	0.117		15.682	166.272
	21.76	0.079		56.027	0.496		1.264	14.203		24.643	0.099		31.766	0.535		8.007	141.092
	13.783	0.21		36.605	0.268		2.702	17.6		29.753	0.098		7.542	122.496		7.022	123.637
	16.919	0.088		60.651	0.18		1.701	10.41		31.105	0.127		8.422	150.429		9.048	166.446
	33.453	0.09		72.21	0.638		1.272	16.813		14.547	0.076		28.623	0.447		9.219	150.217
	29.24	0.113		41.832	0.73		2.781	0.625		44.922	0.117		1.064	0.104		23.491	8.399
	24.224	0.082		53.691	0.261		2.655	22.002		0.628	0.067		24.468	0.449		7.136	109.739
	36.419	0.072		63.274	0.232		1.735	17.628		0.548	0.082		18.511	0.501		12.325	199.749
	24.474	0.102		68.309	0.212		1.592	1.24		30.139	0.1		29.373	0.297		13.006	206.259
	27.764	0.08		49.106	0.248		3.377	0.748		10.348	186.622		1.949	22.776		9.236	137.35
	33.964	0.144		67.721	0.537		1.088	9.009		16.773	17.671		1.065	0.12		9.609	164.573
	34.241	0.128		45.735	0.233		4.534	28.327		10.489	172.772		1.006	0.099		1.002	1.508
	32.141	0.091		44.994	0.317		1.882	13.867		5.48	0.958		0.902	0.097		9.345	144.989
	31.061	0.081		25.999	0.241		2.942	26.251		10.261	187.394		6.287	108.98		10.726	184.507
	2.918	0.148		40.44	0.312		1.047	13.138		11.994	86.64		8.324	140.439		7.453	105.165
	36.399	0.093		41.233	0.166		3.202	0.848		8.77	0.094		0.875	0.077		9.059	156.462
	32.101	0.095		44.37	0.276		1.869	21.647		1.467	0.16		1.343	5.704		10.529	175.859
	1.457	0.178		23.674	0.165		1.151	11.643		7.38	133.945		29.74	0.521		10.893	188.403
	15.703	0.113		46.583	7.375		2.604	8.159		4.217	74.529		0.819	0.116		12.989	0.755
	24.703	0.117		49.418	0.276		1.489	13.917		6.116	107.539		23.486	0.478		16.412	228.399
	20.24	0.098		40.035	0.234		1.882	21.745		5.331	95.346		3.6	1.958		7.529	131.124
	32.352	0.074		56.649	0.343		1.975	13.199		5.575	101.312		8.08	150.233		10.577	178.408
	13.601	0.117		44.782	0.149		2.288	27.391		8.322	158.891		7.271	105.968		17.737	0.349
	29.256	0.186		33.761	0.094		2.323	28.867		7.787	139.73		25.985	0.256		16.021	216.5
	28.316	0.058		34.127	0.085		1.194	11.63		4.426	59.799		5.314	0.214		38.073	0.507
	9.46	0.077		0.746	0.118		1.884	26.641		8.079	148.712		0.622	0.068		35.144	0.576
	25.378	0.12		45.438	0.077		1.865	24.493		3.662	64.65		0.786	0.13		3.193	33.406
	3.022	0.134		38.548	0.109		1.988	25.638		7.204	113.135		0.732	0.088		33.426	0.516
	23.158	0.186		40.502	0.075		1.531	17.065		8.824	157.143		9.942	158.276		19.662	0.332
	31.006	0.123		0.613	0.09		3.565	1.147		6.196	117.918		1.841	0.714		3.178	39.394
	31.877	0.079		35.392	0.081		1.931	22.405		3.866	65.566		7.971	147.758		32.106	0.939
	6.978	0.105		19.592	0.157		1.671	5.077		8.997	154.115		0.793	0.081		15.885	0.287
	29.518	0.227		46.514	0.157		2.488	29.614		5.233	97.297		6.279	94.393		32.897	0.356
	18.489	0.054		5.789	99.476		1.949	24.454		4.279	75.679		0.725	0.072		2.44	34.222
	28.413	0.076		6.647	114.637		0.727	0.659		9.887	171.056		0.775	0.106		12.798	223.28
	10.536	0.149		44.533	0.107		1.434	0.391		10.295	104.718		11.323	203.035		11.665	27.483
	15.866	0.129		46.03	0.101		0.907	0.539		4.272	86.693		0.907	0.112		12.249	215.981
	30.982	0.123		41.901	0.094		1.908	22.287		6.355	128.552		7.675	135.752		4.295	12.648
	28.19	0.118		7.442	131.493		0.972	0.458		6.606	132.326		0.825	0.115		0.777	0.123
	26.868	0.1		43.172	0.119		1.868	18.771		8.551	149.964		6.402	112.469		0.83	1.394
	36.887	0.114		42.304	0.111		0.992	0.299		5.903	115.051		9.221	174.351		0.748	1.69
	32.569	0.115		59.737	21.051		2.331	23.795		5.133	97.142		7.654	117.229		0.83	2.381
	24.311	0.118		8.079	115.155		2.857	32.854		9.027	75.825		11.965	198.011		10.258	176.852
	15.426	0.209		46.569	0.104		1.799	26.185		3.834	67.058		9.343	172.762		9.244	104.353
	40.914	0.417		52.581	0.074		1.818	0.719		6.864	138.365		11.649	199.35		1.107	0.149
	24.771	0.139		52.877	0.187		1.357	12.428		8.115	154.896		1.091	1.512		0.672	0.107
	4.304	0.107		50.553	0.129		1.864	26.174		4.994	93.939		11.101	187.293		10.031	0.09
	25.765	0.141		10.536	180.712		1.965	25.81		5.283	100.498		0.713	0.106		8.285	158.756
	33.323	0.081		10.568	180.722		5.659	20.428		7.014	144.403		7.71	140.224		7.933	145.965
	34.086	0.104		49.19	0.141		2.312	33.123		5.198	91.822		3.097	47.767		10.765	180.497
	30.352	0.104		49.05	0.111		2.02	26.776		9.394	88.173		13.369	214.904		9.964	53.341
	26.458	0.115		37.37	0.129		1.91	25.013		6.596	75.686		1.594	8.334		4.423	70.328
	30.604	0.338		36.555	0.759		2.024	24.006		6.848	134.065		10.756	186.967		3.233	58.287
	3.725	0.192		6.191	0.343		1.793	21.328		6.166	118.82		2.112	1.24		5.086	29.495
	27.795	0.125		49.296	0.122		2.068	24.54		9.425	79.025		6.932	102.871		3.788	32.76
	21.821	0.101		42.39	0.156		3.385	45.584		6.089	106.695		1.71	14.7		3.893	32.141
	19.808	2.966		38.482	0.161		1.982	23.147		6.067	110.08		10.143	173.831		9.378	0.883
	28.663	0.089		50.252	0.126		1.808	17.676		5.592	111.118		10.395	139.789		8.343	30.182
	27.325	0.121		59.622	0.128		2.442	27.826		9.416	94.855		1.154	1.839		4.465	55.894
	35.004	0.151		43.163	0.462		1.846	17.192		12.257	174.531		7.172	124.376		16.807	51.367
	36.606	0.75		51.046	0.14		2.563	33.895		7.355	133.225		8.614	137.129		7.624	44.521
	33.104	0.111		48.129	0.212		1.927	17.388		6.377	115.687		9.839	184.034		4.611	52.508
	21.997	0.342		47.821	0.15		2.377	28.385		8.457	144.072		4.242	88.852		7.398	120.149
	28.701	0.092		53.385	0.158		2.558	19.004		6.247	116.259		10.925	177.2		11.683	46.755
	23.702	0.126		47.566	0.154		1.828	22.547		6.566	125.183		1.079	0.326		4.455	54.803
	26.765	0.106		47.907	0.17		2.643	33.764		4.207	75.171		27.543	184.991		2.977	51.391
	1.294	0.277		50.433	0.122		2.259	27.733		8.109	155.985		9.741	165.016		1.617	0.49
	23.814	0.171		32.353	0.493		2.354	18.203		4.624	83.72		1.684	0.606		7.762	105.813
	22.262	0.215		0.845	0.432		1.452	13.411		6.113	90.059		7.759	136.418		14.408	32.674
	16.738	0.122		48.987	0.219		2.425	25.35		6.388	125.163		7.513	125.116		8.31	91.077
	22.975	0.121		62.248	0.137		3.303	22.176		6.193	104.208		8.47	143.753		6.962	129.667
	27.631	0.097		34.515	0.158		3.651	45.479		7.183	112.069		10.79	181.78		7.761	132.345
	3.266	0.083		40.5	0.237		2.012	19.218		8.889	112.243		10.027	173.229		11.624	5.1
	28.254	0.112		76.911	0.14		1.961	15.029		5.697	115.09		7.284	114.414		5.417	72.222
	21.113	0.227		34.506	0.288		2.457	29.387		4.335	70.592		10.6	174.783		10.503	36.248
	28.014	0.093		55.974	0.166		2.789	21.881		7.284	129.585		9.608	133.495		5.056	21.622
	31.026	0.089		43.022	0.225		2.94	0.331		3.772	63.216		5.819	90.869		7.224	17.332
	13.532	0.124		35.461	0.178		8.841	27.187		5.958	95.458		17.306	247.928		5.729	55.646
	38.104	0.107		44.658	0.145		8.634	1.494		4.33	68.402		26.193	0.482		4.564	60.717
	30.641	0.134		36.502	0.22		7.782	43.003		4.089	73.819		13.195	0.113		6.612	47.36
	21.08	0.126		31.369	0.616		6.706	42.269		3.806	66.585		27.926	0.084		7.878	54.759
	35.859	0.158		38.77	0.097		5.958	27.018		5.358	98.326		30.503	0.084		0.904	0.168
	39.541	0.073		11.581	0.094		10.74	62.048		3.121	45.012		22.956	0.128		1.451	0.244
	2.63	0.197		40.829	0.1		26.565	0.487		3.317	46.251		32.346	0.253		1.481	7.352
	21.149	92.34		49.703	0.093		10.246	0.503		5.96	82.721		28.498	0.113		5.439	95.957
	19.87	0.344		51.605	0.092		9.43	61.811		7.31	112.415		21.246	0.138		7.765	121.288
	15.857	0.109		56.807	0.084		8.038	60.036		7.368	112.457		22.516	0.106		4.44	62.324
	25.499	0.094		49.63	0.104		27.633	0.528		7.229	107.821		37.338	0.111		6.393	102.892
	36.187	0.277		57.873	0.09		5.135	18.611		1.053	0.117		17.308	0.363		7.359	102.716
	38.097	0.076		57.513	0.082		7.902	57.262		0.584	0.08		26.684	0.128		6.836	94.6
	29.916	0.11		49.342	0.113		7.07	45.837		28.949	0.105		16.024	0.14		6.364	57.398
	37.327	0.14		55.758	0.146		33.808	0.415		28.404	0.094		17.19	5.726		12.152	217.3
	22.82	104.076		51.889	0.108		32.291	0.47		30.608	0.132		28.723	0.645		8.261	24.688
	23.618	0.145		51.544	0.093		8.559	57.505		36.161	0.086		21.541	0.108		7.334	77.175
	5.368	39.561		51.651	0.095		4.511	0.463		47.512	0.069		37.002	0.122		7.889	129.489
	4.205	0.341		60.396	0.086		8.578	0.469		31.538	0.087		25.739	0.12		1.353	0.716
	2.807	2.838		50.048	0.146		11.047	69.059		39.404	0.118		21.542	0.106		12.481	209.403
	24.617	0.161		37.596	0.096		11.544	58.266		28.989	0.121		7.58	0.995		6.308	101.975
	23.089	0.213		52.309	0.149		7.444	44.948		0.63	0.08		6.514	99.434		13.65	222.863
	27.583	1.273		43.041	0.106		7.307	49.103		0.508	0.088		27.347	0.518		25.388	0.314
	29.415	0.097		25.253	0.171		22.638	65.971		0.482	0.062		33.657	0.639		18.117	226.882
	17.386	0.137		51.145	0.122		9.753	73.585		0.696	0.091		29.533	0.085		1.191	1.052
	43.664	0.118		47.36	0.084		7.318	44.238		1.225	0.139		27.262	0.117		14.831	191.876
	5.842	0.956		48.894	0.156		14.709	75.222		1.351	0.203		24.838	1.672		29.274	1.31
	26.936	1.008		47.591	0.131		8.931	2.731		0.917	1.287		30.234	0.345		8.129	137.671
	14.861	77.279		36.809	0.108		14.252	39.944		0.82	0.058		34.591	0.056		5.535	96.023
	35.633	0.077		62.33	0.097		10.805	63.154		0.945	0.109		36.861	0.122		11.166	178.751
	0.872	0.274		59.774	0.161		9.571	53.877		0.769	0.089		28.568	0.373		1.098	1.448
	21.336	8.952		58.577	0.081		8.56	45.559		0.487	0.244		9.939	0.229		13.815	219.684
	2.813	0.896		33.915	0.132		11.003	61.698		4.641	18.965		12.266	98.398		1.761	0.186
	11.569	12.224		58.338	0.107		23.369	77.913		4.813	21.669		19.11	0.096		1.43	0.24
	4.767	0.324		20.191	0.142		16.245	71.592		4.122	80.994		32.877	0.566		11.168	194.678
	24.226	0.152		54.197	0.153		8.236	46.886		9.628	193.878		16.367	0.227		7.943	139.686
	28.97	0.196		44.361	0.14		12.171	15.186		8.931	189.815		7.478	1.105		2.538	1.175
	20.472	0.207		35.635	5.028		11.654	76.619		9.302	185.104		25.669	0.22		1.805	6.764
	12.101	5.16		21.37	5.538		7.971	58.194		5.178	96.801		32.07	0.234		8.204	145.224
	39.137	0.151		1.172	0.173		11.63	72.866		8.159	159.654		42.526	0.103		9.734	167.784
	16.947	8.458		10.46	158.705					9.147	176.233		11.564	0.15		1.302	0.272
	10.592	0.273		13.928	0.095					0.713	1.001		34.39	0.106		9.864	173.601
	8	13.184		11.013	144.882					4.604	87.167		29.86	0.195		14.403	205.607
	29.954	0.086		9.053	129.664					4.335	73.846		29.336	0.089		9.32	158.619
	12.077	0.149		1.035	0.13					4.96	86.659		15.577	0.27		9.217	162.273
	18.404	0.316		1.352	0.108					0.471	1.194		9.352	128.099		2.027	4.605
	28.164	0.14		24.627	19.77					5.203	81.123		29.106	0.144		9.81	140.489
	17.666	18.386		1.292	0.251					4.409	78.051		39.836	0.212		11.338	177.586
	22.944	0.351		0.979	0.107					4.998	99.538		18.639	0.261		2.179	0.847
	36.721	0.113		0.865	0.108					2.298	33.015		18.106	0.368		1.86	2.25
	2.313	0.782		17.052	193.827					4.958	91.991		32.778	0.26		8.443	98.359
	31.874	0.069		0.953	0.096					5.776	35.587		35.433	0.126		7.255	25.557
	28.043	0.06		1.057	0.121					5.373	96.737		33.237	0.287		8.772	97.578
	12.495	0.63		48	0.11					2.927	43.882		25.394	3.684		6.432	75.215
	29.512	0.085		64.095	0.163					0.804	0.715		25.859	0.634		6.746	103.89
	42.4	0.075		56.877	0.126					5.679	75.189		21.46	0.282		13.568	138.789
	41.847	0.07		53.996	0.14					7.77	160.102		40.727	0.098		13.998	146.195
	50.302	0.064		46.079	0.101					6.125	110.612		30.83	0.379		11.822	158.354
	57.87	0.058		36.742	0.138					4.078	74.383		30.153	0.386		13.311	152.562
	49.589	0.081		39.951	0.15					6.108	115.828		32.897	0.17		15.267	171.498
	50.654	0.083		42.876	0.138					0.826	0.148		25.394	0.221		14.999	212.535
	29.962	0.069		64.418	0.229					6.622	73.236		18.427	0.342		11.374	153.345
	48.521	0.057		45.725	0.196					5.383	97.575		40.066	0.123		1.855	0.625
	42.65	0.072		51.419	0.168					4.578	78.533		15.668	0.147		5.798	7.143
	34.404	0.075		53.399	0.177					4.313	83.806		35.855	1.333		15.429	146.568
	37.209	0.093		55.484	0.256					6.864	120.934		27.939	0.119		1.508	0.641
	43.529	0.112		53.01	0.203					1.075	0.137		28.601	0.177		8.726	140.495
	37.611	0.087		47.882	0.176					1.027	0.139		45.244	0.16		15.864	160.286
	41.841	0.076		56.319	0.192					0.677	0.124		51.365	0.162		31.308	216.038
	40.39	0.067		38.698	0.113					0.663	0.107		37.47	0.321		3.511	36.805
	39.993	0.049		64.74	0.188					3.925	61.12		32.751	0.212		36.685	230.843
	36.6	0.071		30.975	0.156					4.821	77.075		45.038	0.127		6.433	92.605
	48.215	0.096		51.421	0.192					4.73	72.198		29.243	0.122		8.417	142.396
	53.544	0.079		47.587	0.239					3.705	62.645		19.214	0.241		13.875	13.7
	44.209	0.088		61.968	0.21					6.649	121.914		38.716	0.192		8.386	142.326
	38.394	0.075		62.204	0.162					7.28	140.595		27.094	0.292		1.377	2.24
	44.383	0.068		56.09	0.209					8.44	152.658		45.058	0.116		7.488	129.215
	45.031	0.087		63.512	0.436					9.932	175.743		13.073	0.12		9.056	144.072
	47.927	0.092		57.347	0.168					6.857	118.428		22.034	0.249		1.5	1.878
	44.01	0.101		50.349	0.171					7.192	113.197		34.908	0.09		2.498	0.374
	44.535	0.088		72.908	0.298					2.71	46.905		31.339	0.159		9.405	163.631
	29.454	0.091		41.737	0.262					18.567	0.107		31.352	0.155		1.096	1.119
	45.494	0.057		48.324	0.235					13.728	0.551		37.627	0.239		1.706	0.423
	14.402	0.096		54.567	0.153					17.787	0.191		45.063	0.302		7.236	106.801
	41.571	0.098		49.074	0.329					10.337	0.166		35.114	0.196		1.275	0.351
	44.208	0.085		57.191	0.233					22.586	0.25		36.783	0.105		9.33	126.839
	41.936	0.109		25.428	0.194					23.356	0.378		38.7	0.124		9.325	152.546
	46.156	0.096		71.079	0.19					27.953	0.191		24.48	0.234		1.022	0.725
	32.69	0.063		56.235	0.186					19.34	0.111		47.52	0.095		1.226	0.262
	49.387	0.07		55.373	0.257					21.486	15.797		18.929	0.247		0.81	0.753
	52.893	0.087		74.524	0.269					18.534	0.164		31.927	0.229		3.62	51.585
	42.659	0.079		77.155	0.315					23.829	0.217		19.227	0.223		10.723	183.204
	42.773	0.056		47.375	0.169					14.991	0.27		38.738	0.21		8.398	141.615
	37.797	0.086		60.067	0.224					5.351	92.645		27.804	0.347		1.384	0.722
	47.826	0.062		39.763	0.238					25.779	0.112		18.105	0.457		10.704	175.552
	24.07	0.064		50.471	0.211					24.321	0.24		45.298	0.103		10.105	162.152
	41	0.095		54.94	0.185					4.933	94.237		27.533	0.189		7.661	118.66
	32.479	0.06		62.582	0.172					13.108	0.26		20.398	0.23		5.819	94.849
	34.505	0.092		60.913	0.21					15.414	0.238		24.344	0.291		9.93	168.798
	27.121	0.103		58.862	0.244					14.396	0.068		38.871	0.163		8.614	154.374
	53.254	0.075		50.04	0.259					26.075	1.836		26.815	0.33		7.133	99.286
	50.253	0.085		58.508	0.236					26.89	0.404		28.384	0.162		0.83	0.316
	48.16	0.085		53.728	0.145					27.784	0.084		33.012	0.099		6.508	109.5
	45.726	0.095		70.048	0.305					0.675	0.327		15.718	0.178		7.019	117.117
	45.977	0.079		46.689	0.311					7.051	0.252		21.499	0.161		7.113	91.8
	58.748	0.1		64.713	0.151					14.373	6.518		29.221	0.151		7.041	112.234
	43.568	0.098		40.742	0.211					23.798	0.88		26.249	0.235		1.051	1.889
	28.158	0.053		62.906	0.272					21.213	0.081		29.683	0.201		5.816	89.005
	38.787	0.093		65.372	0.199					4.839	86.364		30.092	0.146		5.16	85.347
	37.175	0.075		42.398	0.231					16.865	0.092		22.325	0.139		7.177	108.586
	44.503	0.101		46.479	0.236					0.544	0.303		36.32	0.125		0.984	1.659
	49.507	0.064		73.924	0.226					13.723	0.144		24.804	0.155		2.782	31.37
	54.551	0.063		52.422	0.116					11.493	1.748		29.01	0.161		1.293	2.678
	44.644	0.09		51.293	0.16					7.37	2.5		24.494	0.139		10.027	182.142
	56.616	0.078		67.171	0.226					0.385	0.051		34.309	0.075		8.546	148.407
	48.633	0.085		66.634	0.234					12.069	0.469		21.533	0.128		2.138	19.173
	40.366	0.078		55.123	0.18					0.56	0.07		6.985	80.613		4.443	53.231
	51.086	0.105		35.759	0.291					10.886	2.102		31.823	0.135		9.651	164.516
	30.632	0.081		32.359	0.188					0.673	0.164		32.774	0.131		4.988	82.988
	40.091	0.083		55.579	0.226					6.91	117.263		12.548	0.122		9.732	162.568
	35.939	0.078		57.483	0.23					0.52	0.27		1.379	0.156		5.259	79.436
	41.327	0.098		78.96	0.16					9.44	123.935		1.243	0.125		8.487	138.938
	40.058	0.113		56.543	0.179					17.521	0.21		31.29	0.101		1.899	3.939
	52.079	0.084		71.074	0.193					20.698	0.243		12.478	211.827		6.419	117.687
	23.146	0.069		69.238	0.164					6.978	121.462		30.01	0.127		8.058	142.292
	35.706	0.105		66.27	0.243					19.545	0.101		36.321	0.113		5.959	83.985
	43.968	0.102		52.201	0.142					7.449	0.449		29.313	0.121		4.767	76.005
	48.548	0.068		43.226	0.268					2.004	32.818		0.865	0.094		3.342	50.035
	54.356	0.132		66.098	0.285					7.929	0.129		8.928	0.134		17.352	221.686
	55.432	0.112		28.624	0.211					10.377	0.04		6.357	0.119		4.073	42.881
	48.726	0.082		64.28	0.21					2.754	37.84		11.027	0.073		12.274	194.901
	26.474	0.054		61.75	0.151					9.649	6.82		10.218	0.093		6.185	96.159
	40.767	0.109		57.462	0.152					0.372	0.102		12.473	0.082		1.351	1.862
	51.379	0.077		53.772	0.144					0.48	0.45		1.966	0.2		8.064	131.001
	23.894	0.055		68.438	0.226					0.807	0.832		14.078	0.089		10.252	158.943
	53.319	0.117		60.898	0.184					1.534	0.498		11.757	0.073		1.889	0.553
	45.321	0.318		62.792	0.207					7.333	142.908		4.306	0.048		1.257	8.098
	55.502	0.093		28.526	0.229					7.082	133.568		10.36	0.16		1.834	2.536
	37.807	0.305		61.802	0.214					5.258	104.164		12.751	0.062		18	237.014
	54.783	0.09		74.297	0.331					2.472	19.541		14.222	0.073		4.721	51.967
	26.594	0.145		68.466	0.236					0.939	0.21		10.738	0.12		5.635	62.819
	47.033	0.328		49.299	0.175					6.41	127.475		10.788	0.087		6.534	105.261
	63.491	0.484		55.813	0.238					6.61	117.536		10.764	0.068		6.802	126.753
	55.176	0.096		69.753	0.215					4.635	80.229		11.816	0.092		6.102	101.228
	46.028	0.096		70.094	0.221					4.369	78.003		0.569	0.104		5.762	92.224
	48.745	0.609		68.391	0.16					6.369	128.702		12.174	0.081		8.227	134.232
	59.104	0.14		49.89	0.193					6.674	141.951		10.261	0.102		8.748	142.651
	47.229	0.196		40.581	0.324					5.196	101.657		1.45	0.439		6.628	123.575
	55.788	0.096		57.108	0.226					5.384	105.486		16.389	0.102		6.6	114.091
	25.151	0.092		47.288	0.325					6.717	124.569		12.584	0.094		1.344	0.462
	53.736	0.897		41.993	0.336					6.451	125.093		11.74	0.135		6.795	66.408
	42.838	0.131		53.111	0.191					2.54	40.646		13.234	0.101		3.324	0.211
	22.529	0.08		53.376	0.203					3.699	62.831		5.843	97.647		1.692	7.158
	36.747	0.509		64.632	0.294					2.402	36.258		0.569	0.217		7.303	62.432
	48.293	0.125		56.9	0.299					5.938	113.537		13.736	0.107		9.167	166.02
	40.431	0.758		62.771	0.167					7.095	138.388		4.073	74.785		6.464	104.992
	59.258	1.214		61.05	0.185					5.846	112.058		1.517	0.12		7.23	65.152
	35.978	0.122		79.531	0.237					0.678	0.076		5.605	92.228		1.739	0.246
	55.976	0.105		66.686	0.207					1.753	0.233		0.697	0.751		8.422	150.88
	21.869	0.09		58.189	0.212					5.139	78.734		3.408	54.279		1.122	0.168
	42.933	0.101		68.319	0.252					9.056	182.495		6.232	0.106		3.189	20.35
	43.099	0.137		68.239	0.171					2.326	0.412		6.232	96.546		1.984	1.848
	58.072	0.836		52.798	0.241					0.66	0.095		7.282	94.575		9.035	145.603
	55.375	0.321		63.859	0.15					1.1	0.283		4.795	90.96		10.389	188.769
	46.18	0.078		61.927	0.154					0.863	0.12		1.105	1.947		6.661	98.747
	47.577	0.67		1.007	0.106					7.077	130.431		3.452	38.775		8.022	2.167
	56.366	0.165		1.059	0.135					1.954	0.213		7.13	133.35		7.147	107.504
	60.145	0.496		1.809	0.45					11.99	0.489		5.854	108.747		5.306	45.77
	57.838	0.249		0.923	5.632					6.701	0.514		6.813	121.15		8.822	162.003
	42.445	0.098		1.396	0.178					11.185	40.359		4.313	73.621		7.872	0.176
	33.501	0.089		6.84	99.814					5.478	58.792		6.124	81.949		7.123	102.545
	46.553	0.203		1.011	1.109					5.856	58.337		7.427	58.795		11.049	196.955
	23.32	0.136		0.927	0.129					11.469	2.173		15.312	0.07		8.878	131.128
	19.613	0.139		0.979	0.153					5.577	66.595		6.74	115.648		8.385	84.117
	60.956	0.211		0.781	0.909					9.352	24.549		19.388	0.073		8.295	89.31
	61.874	0.387		1.242	0.128					5.999	43.167		6.357	124.446		1.948	17.82
	63.047	0.107		1.11	0.168					24.392	0.512		4.661	88.176		5.79	70.649
	61.59	0.098		6.186	98.72					11.851	3.545		26.668	0.087		8.934	136.318
	35.237	0.091		1.181	0.147					23.367	0.218		5.467	106.298		0.798	0.547
	17.512	0.06		9.721	156.916					5.462	42.587		6.966	132.341		7.103	97.028
	52.318	0.089		0.867	0.182					15.509	0.434		4.505	78.38		5.382	21.439
	60.645	0.521		45.45	0.121					15.42	0.246		4.278	77.465		11.762	204.687
	54.03	0.093		1.058	0.147					25.182	0.791		7.315	128.376		8.645	167.84
	61.312	0.309		46.735	0.127					24.208	0.51		26.499	0.062		4.808	42.734
	51.873	0.06		43.369	0.129					6.422	46.122		7.001	133.942		6.607	121.811
	47.847	0.161		58.351	0.115					17.982	0.333		25.173	0.138		7.251	105.893
	26.488	0.2		38.064	0.108					5.593	80.339		14.791	0.69		1.84	0.285
	60.036	0.212		45.159	0.096					15.737	0.476		18.948	6.396		12.288	114.23
	38.125	0.272		43.061	0.126					19.264	0.726		4.896	75.569		7.734	107.556
	58.795	0.097		31.677	0.17					21.492	0.355		7.173	119.766		6.266	85.354
	39.803	0.124		32.607	0.183					19.953	0.527		15.359	0.341		1.566	1.293
	68.829	0.092		43.812	0.138					22.483	0.367		24.51	0.131		9.854	165.795
	52.054	0.353		38.393	0.189					21.474	0.243		5.446	89.496		7.213	107.717
	51	0.269		8.573	147.797					8.863	3.726		4.983	41.27		6.898	84.552
	62.124	0.489		46.882	0.11					4.333	41.189		15.903	0.101		1.404	0.208
	46.249	0.166		45.973	0.137					7.677	0.288		8.924	0.079		7.616	74.836
	53.111	0.515		24.859	0.141					19.143	0.726		6.704	132.402		7.949	65.633
	75.684	0.09		40.665	0.102					25.249	0.359		18.266	0.099		1.399	0.457
	59.355	0.087		44.224	0.094					22.516	0.259		18.557	0.369		8.077	117.261
	56.877	0.102		46.762	0.14					8.08	0.394		20.913	0.113		3.185	2.618
	56.468	0.068		37.45	0.123					25.529	0.418		24.004	0.055		3.185	19.722
	63.662	0.067		33.77	0.155					18.394	0.418		16.177	0.158		4.868	51.023
	60.209	0.113		35.467	0.162					22.163	0.384		15.286	1.391		4.536	27.738
	66.453	0.243		6.451	105.043					6.891	3.284		9.691	158.931		5.701	55.54
	41.147	0.192		38.488	0.115					11.468	0.705		4.519	51.026		8.217	0.159
	62.944	0.247		38.729	0.12					8.222	64.579		20.867	0.084		9.752	0.464
	42.654	0.101		42.37	0.143					21.107	0.564		5.109	0.115		19.48	0.275
	54.023	0.086		43.019	0.12					17.704	1.303		20.562	0.08		20.88	0.368
	65.929	0.098		28.678	0.143					15.607	0.273		5.548	101.758		7.815	0.746
	52.662	0.13		38.298	0.095					27.232	0.491		13.562	0.07		17.125	0.684
	60.97	0.11		24.697	0.154					20.545	0.892		22.719	0.092		15.423	0.229
	29.353	0.467		31.922	0.183					16.88	0.233		5.736	98.252		13.476	10.978
	31.045	0.199		40.229	0.121					12.167	0.573		4.893	73.725		20.493	0.233
	41.332	0.074		37.985	0.1					27.83	0.534		18.17	0.032		17.648	0.125
	27.359	0.07		38.199	0.155					13.493	0.725		8.538	124.46		18.065	0.173
	26.283	0.08		30.083	0.137					19.146	0.305		15.667	0.046		22.914	0.827
	34.946	0.062		15.93	0.203					15.484	0.207		24.105	0.063		22.893	0.173
	25.313	0.077		16.135	0.156					16.448	0.255		15.599	0.065		17.774	0.704
	36.256	0.129		29.928	0.151					23.42	0.211		20.462	0.055		1.937	0.592
	25.64	0.07		44.215	0.162					20.204	0.244		7.885	129.688		14.625	0.334
	37.419	0.068		12.625	215.838					8.635	0.434		18.942	0.068		18.873	19.88
	22.966	0.077		28.317	0.129					22.728	0.273		22.534	0.073		9.513	144.474
	21.611	0.064		43.168	0.123					20.967	0.169		22.415	0.09		8.175	0.493
	34.186	0.093		27.019	0.211					17.269	0.673		15.59	0.152		12.65	0.115
	19.198	0.086		42.754	0.146					17.845	0.265		14.875	0.084		14.987	2.881
	31.124	0.084		19.952	6.257					8.965	0.183		36.148	0.066		26.407	0.52
	17.189	0.124		38.928	0.15					18.886	0.225		31.234	0.11		4.339	61.058
	24.607	0.064		20.866	0.223					4.283	71.869		20.913	0.028		28.066	0.322
	22.828	0.11		13.057	215.288					7.485	135.525		14.584	0.068		22.569	0.383
	21.716	0.083		34.779	0.168					11.874	12.938		22.288	0.087		25.394	0.41
	25.756	0.093		39.209	0.191					26.575	0.943		10.342	0.042		27.76	0.627
	35.719	0.089		30.646	0.3					12.222	0.317		18.348	0.053		5.339	75.62
	27.516	0.061		28.164	0.184					15.455	0.688		24.595	0.08		23.124	3.544
	24.216	0.127		39.095	0.152					12.227	0.385		20.088	0.067		25.956	0.177
	30.027	0.175		46.757	0.127					17.988	0.963		0.413	0.135		20.447	2.121
	22.317	0.082		42.073	0.143					9.255	0.544		0.833	0.658		9.244	141.707
	29.521	0.089		24.898	0.148					8.096	0.293		0.666	0.678		8.509	134.557
	25.567	0.04		25.792	0.205					8.386	0.673		0.697	0.317		1.575	0.227
	31.222	0.077		26.503	0.18					26.089	0.285		5.862	105.893		6.091	80.658
	17.52	0.078		39.737	0.158					5.463	0.581		4.463	85.977		5.467	68.518
	33.881	0.141		41.35	0.108					7.383	0.113		0.583	0.333		4.581	59.573
	3.284	0.074		31.834	0.246					9.848	34.684		3.013	52.209		6.568	94.934
	18.657	0.054		32.91	0.239					2.706	43.011		0.506	0.186		1.296	1.169
	21.846	0.087		19.305	0.178					3.033	58.571		5.38	98.657		8.162	129.737
	20.236	0.08		37.622	0.203					2.98	64.184		5.477	102.965		8.24	125.585
	2.988	0.143		46.082	0.201					1.978	31.281		1.041	0.097		1.415	0.82
	31.295	0.077		39.06	0.191					3.783	69.341		0.429	0.128		1.641	0.203
	25.964	0.071		41.675	0.174					1.824	32.021		0.472	0.055		24.104	6.783
	9.269	0.369		24.158	0.278					2.857	50.44		0.514	1.338		25.615	2.413
	18.391	0.097		41.753	0.373					3.347	60.959		2.588	40.538		9.808	130.493
	24.684	0.15		37.008	0.194					3.228	57.858		5.017	91.371		8.76	127.265
	26.123	0.081		33.094	0.22					2.099	39.097		4.386	75.277		7.851	113.097
	15.357	0.084		25.313	0.255					2.391	43.268		0.718	0.127		5.975	86.35
	26.152	0.077		37.732	0.222					2.699	55.752		7.089	145.899		15.897	227.826
	32.057	0.069		26.146	0.14					2.265	43.282		7.334	155.231		21.474	0.455
	34.132	0.097		34.02	0.186					2.308	43.986		5.365	0.956		1.65	4.712
	5.23	0.145		47.617	0.905					0.697	0.963		7.942	0.074		6.376	53.263
	40.679	0.143		44.208	0.293					2.501	35.593		6.41	128.528		9.988	119.978
	29.099	0.127		28.653	0.226					2.778	60.187		4.643	0.894		11.34	0.461
	33.124	0.063		23.238	2.035					1.883	34.476		5.907	116.79		6.458	85.212
	20.719	0.146		41.782	0.254					3.076	55.938		4.08	79.633		10.815	143.894
	3.569	0.072		34.596	0.196					2.739	55.966		14.616	0.084		7.418	93.2
	28.581	0.074		21.682	0.274					3.327	68.59		11.362	0.079		8.781	135.946
	23.906	0.071		33.411	0.582					2.671	44.712		2.544	0.05		1.575	0.245
	1.797	0.163		27.791	0.183					2.184	41.498		6.482	0.088		14.867	217.498
	17	0.098		6.926	0.472					0.724	0.421		6.126	118.291		7.816	72.295
	26.973	0.109		11.698	0.207					3.582	65.695		9.09	0.089		3.409	0.193
	27.176	0.101		21.254	0.292					2.779	57.057		12.147	0.08		3.38	0.356
	27.923	0.101		36.107	0.149					1.863	34.646		17.45	0.21		3.975	0.534
	36.986	0.074		39.727	0.262					0.293	0.204		4.978	91.165		9.991	142.882
	27.984	0.094		42.819	0.151					0.804	0.524		5.474	0.752		9.59	149.944
	28.242	0.075		43.464	0.199					4.421	60.415		10.328	0.175		8.776	140.144
	25.465	0.168		46.518	0.389					2.491	45.741		13.693	0.065		6.069	84.602
	29.894	0.114		1.267	0.166					2.449	46.573		5.259	1.68		7.072	101.899
	21.69	0.146		10.823	177.096					3.533	62.455		9.546	0.133		5.52	77.029
	5.32	0.074		37.906	0.351					4.476	94.046		21.839	0.122		13.358	192.768
	28.638	0.095		41.238	0.171					2.172	42.942		9.91	0.069		10.582	157.738
	31.84	1.207		45.675	0.249					1.885	33.847		4.15	0.262		5.594	74.297
	19.207	0.112		48.252	0.189					2.173	19.434		8.928	0.096		1.058	0.308
	1.89	0.481		14.732	219.43					1.362	19.122		15.598	0.1		0.973	3.359
	1.577	0.066		37.298	0.201					1.174	16.112		13.309	0.083		4.987	76.109
	30.542	0.078		57.295	0.195					0.908	9.89		9.94	0.071		8.545	104.392
	6.203	0.236		34.398	0.323					2.637	52.925		11.888	0.069		1.321	2.703
	18.878	0.174		36.57	0.252					1.113	19.708		7.275	0.069		0.977	0.702
	5.188	0.128		42.765	0.215					6.256	135.098		13.475	0.115		1.196	5.327
	10.919	0.146		47.152	0.326					5.11	60.498		11.89	0.077		1.126	1.498
	12.691	0.075		9.667	141.413					2.51	50.399		11.033	0.085		8.207	113.306
	23.58	0.073		51.727	0.525					2.88	59.247		14.576	0.073		1.512	1.85
	18.789	0.129		49.121	0.572					3.217	58.447		8.598	0.081		11.403	166.224
	11.432	0.052		51.655	0.449					3.071	68.783		7.004	0.071		6.83	94.69
	23.563	0.118		47.57	0.425					2.231	37.276		15.397	0.075		10.035	145.66
	10.893	0.087		1.163	0.113					2.003	33.062		6.172	0.034		5.983	69.449
	36.675	0.099		29.436	0.346					3.569	70.605		10.798	0.099		1.235	3.692
	19.326	0.087		57.893	0.576					4.803	99.549		14.963	0.062		1.367	3.801
	8.619	0.11		56.023	0.359					2.889	47.905		8.188	0.068		0.701	0.229
	11.932	0.225		58.115	0.894					4.592	92.856		13.372	0.07		6.807	100.793
	5.952	0.054		36.763	0.766					2.563	49.547		11.462	0.061		8.557	134.83
	4.121	0.108		64.117	0.542					0.309	0.932		10.625	0.073		1.295	0.727
	28.19	0.13		1.001	0.137					1.77	38.246		12.264	0.057		6.941	94.271
	10.698	0.088		54.618	0.797					2.626	53.517		11.502	0.095		10.628	134.56
	24.499	0.088		1.013	0.119					2.384	40.825		12.556	0.147		13.61	208.39
	3.023	0.083		14.684	218.774					2.492	50.498		12.905	0.052		4.884	71.24
	27.518	0.103		1.265	0.157					4.046	82.808		1.689	0.05		12.168	182.428
	32.444	0.128		13.743	210.272					2.36	45.799		9.983	0.072		1.108	1.349
	20.3	0.176		12.937	197.022					0.903	1.237		22.363	0.064		8.614	125.122
	26.229	0.076		13.796	203.754					5.25	87.953		12.734	0.103		13.285	183.794
	34.069	0.092		33.694	0.071					3.47	72.874		16.727	0.06		7.163	104.445
	9.493	0.138		43.576	0.079					0.962	1.911		11.396	0.102		10.647	131.569
	2.415	0.194		45.105	0.089					1.907	31.965		7.906	0.075		8.152	113.805
	26.408	0.133		48.046	0.087					2.876	55.021		12.382	0.044		2.179	7.287
	5.88	0.122		37.698	0.408					2.977	52.133		11.321	0.069		6.735	13.932
	28.974	0.137		45.606	0.078					6.068	121.065		20.831	0.054		1.313	6.319
	46.259	0.229		35.285	0.1					3.659	64.728		25.401	0.07		9.473	142.945
	1.747	0.461		37.768	0.114					2.332	43.893		13.18	0.061		6.744	81.156
	1.268	0.174		25.319	0.097					10.198	195.956		11.454	0.074		10.97	169.245
	33.802	0.123		43.356	0.093					2.291	44.138		13.568	0.075		11.245	168.048
	40.257	0.125		46.489	0.108								21.944	0.109		6.823	84.972
	56.395	0.129		36.087	0.114								6.713	0.063		5.188	73.444
	7.506	0.093		41.591	0.101								9.725	0.074		3.627	47.988
	1.975	0.218		39.899	0.078								11.097	0.123		2.975	34.967
	30.457	0.109		41.499	0.105								18.631	0.075		6.747	97.158
	46.201	0.22		40.979	0.103								9.794	0.083		8.316	113.045
	42.906	0.16		30.758	0.144								16.674	0.07		9.736	135.197
	1.508	0.144		35.936	0.063								9.991	0.077		10.626	154.704
	11.933	0.18		39.802	0.127								18.76	0.038		4.898	70.374
	9.971	139.176		59.723	0.073								16.191	0.064		8.528	127.139
	1.509	0.091		36.255	0.118								8.355	0.04		8.704	135.204
	43.009	0.166		33.536	0.16								33.603	0.07		6.778	89.885
	51.443	0.103		36.751	0.09								10.916	0.085		14.824	190.031
	44.594	0.126		47.163	0.087								10.639	0.062		13.236	192.475
	23.913	0.165		31.054	0.124								8.044	0.07		5.747	86.111
	4.503	0.146		42.21	0.118								9.15	0.072		7.449	89.363
	34.831	0.362		41.845	0.089								7.899	0.063		6.996	102.766
	11.843	0.185		41.79	0.121								5.154	0.086		6.536	79.013
	33.408	0.131		40.282	0.14								10.739	0.084		7.514	106.97
	11.03	0.359		44.603	0.125								9.667	0.103		7.307	102.74
	38.4	0.655		39.131	0.136								11.897	0.065		7.383	88.037
	35.887	0.179		36.824	0.127								9.223	0.091		10.51	140.334
	35.581	0.506		51.24	0.109								12.165	0.085		8.989	110.779
	44.833	0.283		49.589	0.116								4.201	67.199		22.038	231.581
	3.563	16.578		37.672	0.096								8.338	0.057		11.587	146.498
	37.828	0.085		37.151	0.094								10.211	0.061
	10.643	0.13		41.005	0.149								9.807	0.086
	0.772	0.319		42.074	0.145								11.056	0.082
	48.524	0.655		46.816	0.151								11.787	0.085
	8.934	0.739		20.645	0.182								9.615	0.08
	1.942	1.147		26.965	0.165								12.391	0.072
	42.781	0.169		42.465	0.161								10.25	0.094
	2.669	0.581		38.373	0.129								0.79	0.125
	6.88	0.139		42.326	0.147								10.25	0.09
	26.194	163.082		46.754	0.153								9.755	0.106
	1.494	6.066		37.308	0.235								9.506	0.074
	26.466	164.694		42.497	0.115								1.311	0.052
	2.04	0.066		24.956	19.608								12.898	0.071
	10.869	0.099		9.852	171.693								9.542	0.073
	51.366	0.176		19.807	1.245								1.293	0.058
	29.577	0.966		13.348	0.568								4.724	78.282
	2.534	0.369		41.09	0.161								10.447	0.092
	40.657	0.298		23.946	0.771								11.287	0.059
	3.164	0.831		34.718	0.26								8.214	0.077
	1.92	0.094		19.675	0.544								13.153	0.07
	8.094	0.138		40.167	0.17								0.689	0.045
	44.819	0.164		12.921	1.059								6.541	42.296
	19.08	0.122		18.75	0.367								11.929	0.09
	1.875	0.262		11.074	184.654								4.366	80.838
	43.958	0.121		40.783	0.301								12.161	0.092
	9.025	80.369		22.772	1.568								11.332	0.08
	25.139	0.36		41.732	0.222								7.875	0.073
	51.308	0.104		9.588	152.087								13.553	0.062
	7.707	97.661		46.981	0.188								7.9	163.342
	36.07	0.121		17.846	65.559								14.201	0.084
	10.4	0.149		40.176	0.142								10.764	0.076
	41.705	0.234		25.933	0.395								11.058	0.104
	40.273	0.937		38.258	0.182								12.893	0.111
	11.94	0.113		35.39	0.159								2.456	0.317
	58.414	0.074		17.777	218.682								3.971	68.169
	60.894	0.111		22.467	0.079								10.927	0.064
	56.421	0.069		28.864	0.042								4.69	81.897
	50.07	0.062		25.929	0.06								10.408	0.093
	65.318	0.063		22.387	0.074								12.969	0.068
	61.39	0.112		22.143	0.115								15.908	0.07
	70.268	0.067		32.769	0.094								13.836	0.082
	57.276	0.074		27.284	0.087								10.567	0.235
	57.901	0.083		24.461	0.238								10.596	0.104
	64.182	0.109		28.261	0.178								13.602	0.077
	75.477	0.086		23.761	0.119								14.869	0.052
	61.723	0.097		26.433	0.101								10.684	0.105
	68.797	0.104		23.768	0.07								10.794	0.138
	58.048	0.086		22.457	0.085								16.482	0.066
	60.016	0.072		15.566	0.106								3.809	68.169
	60.521	0.081		17.772	0.182								12.429	0.114
	57.765	0.072		20.541	0.139								1.782	0.384
	63.492	0.073		29.499	0.103								15.636	0.106
	53.994	0.068		26.746	0.538								14.682	0.073
	73.25	0.097		22.256	0.12								11.581	0.149
	62.031	0.084		39.273	0.101								13.215	0.076
	63.991	0.058		28.734	0.103								5.772	99.024
	55.34	0.073		23.679	0.078								13.85	0.08
	69.766	0.058											1.726	0.125
	69.35	0.067											14.32	245.117
	68.196	0.069											4.098	75.611
	63.103	0.051											3.326	65.728
	60.419	0.082											5.05	90.519
	70.09	0.099											5.779	0.095
	46.226	0.095											9.839	185.211
	56.29	0.093											4.614	93.104
	66.42	0.083											13.151	0.071
	64.351	0.093											3.704	36.024
	73.343	0.081											5.964	109.28
	60.03	0.051											6.848	134.732
	68.103	0.076											16.253	0.101
	72.188	0.095											6.485	121.96
	65.236	0.069											4.804	78.188
	61.346	0.065											19.971	0.061
	46.612	0.08											15.258	0.077
	55.599	0.083											6.959	123.049
	75.772	0.07											5.054	98.738
	71.946	0.065											6.308	103.49
	73.63	0.068											19.996	0.082
	57.903	0.078											6.41	128.616
	69.683	0.09											5.641	111.17
	70.194	0.085											5.039	89.355
	61.862	0.101											26.739	0.07
	66.882	0.101											21.303	0.11
	60.113	0.082											5.958	102.026
	62.808	0.091											7.372	134.305
	52.791	0.077											22.087	0.026
	72.322	0.064											4.453	75.351
	67.822	0.104											4.536	80.243
	68.053	0.068											7.772	132.728
	77.584	0.078											24.576	0.103
	65.68	0.084											25.957	0.142
	55.346	0.097											6.664	136.095
	36.597	0.071											24.908	0.123
	61.428	0.082											4.947	88.667
	64.343	0.09											5.246	69.449
	77.018	0.077											3.639	63.387
	61.777	0.067											25.791	0.17
	65.175	0.097											1.138	0.039
	71.171	0.058											7.928	0.052
	51.543	0.109											12.413	0.048
	64.272	0.068											24.602	0.172
	65.26	0.086											24.22	0.201
	6.913	0.162											13.131	0.061
	66.573	0.065											19.464	0.15
	37.823	0.073											13.421	0.048
	65.401	0.086											16.305	0.066
	52.457	0.061											22.1	0.126
	63.598	0.101											15.325	0.038
	66.91	0.055											0.885	0.254
	49.505	0.086											20.229	0.077
	51.371	0.071											9.869	0.075
	58.016	0.078											9.326	0.048
	59.879	0.061											13.012	0.059
	77.853	0.074											19.116	0.067
	49.674	0.047											17.806	0.078
	52.709	0.087											10.43	0.087
	61.338	0.081											11.879	0.072
	57.315	0.08											14.998	0.068
	58.125	0.097											13.971	0.052
	60.989	0.096											3.161	0.039
	61.015	0.058											31.343	0.113
	56.035	0.073											30.473	0.067
	62.979	0.085											36.272	0.117
	55.302	0.074											35.825	0.103
	76.523	0.084											28.194	0.081
	57.002	0.083											29.09	0.804
	61.928	0.066											32.799	0.117
	60.593	0.069											32.144	0.066
	40.695	0.082											32.955	0.096
	62.497	0.085											23.838	0.087
	58.077	0.079											32.672	0.084
	70.532	0.107											30.38	0.11
	53.883	0.076											33.239	0.087
	65.75	0.066											31.371	0.537
	44.279	0.059											25.345	0.148
	63.153	0.081											29.626	0.111
	55.925	0.07											35.033	0.192
	60.15	0.07											19.821	0.358
	45.264	0.083											31.1	0.122
	75.044	0.071											33.156	0.078
	67.577	0.087											23.629	0.259
	55.894	0.076											33.467	0.099
	58.751	0.067											29.152	0.165
	61.172	0.083											25.928	0.054
	60.914	0.081											30.698	0.149
	78.365	0.081											34.439	0.096
	52.2	0.091											31.034	0.215
	70.08	0.078											31.139	0.22
	69.071	0.045											29.784	0.109
	47.347	0.069											23.294	0.078
	68.424	0.093											25.386	0.236
	46.567	0.086											31.314	0.142
	79.034	0.063											35.448	0.091
	47.875	0.075											30.804	0.218
	61.374	0.084											30.349	0.161
	54.298	0.11											21.601	0.167
	64.785	0.074											0.925	0.242
	63.132	0.074											31.421	0.14
	45.748	0.066											37.256	0.214
	55.681	0.097											38.526	0.191
	65.85	0.076											19.07	0.085
	58.504	0.089											32.732	0.116
	64.479	0.066											37.077	0.082
	60.115	0.076											41.764	0.168
	73.587	0.098											20.416	0.125
	63.946	0.102											35.25	0.107
	63.037	0.11											37.235	0.122
	54.452	0.052											24.916	0.07
	64.719	0.105											22.977	0.085
	63.591	0.083											25.861	3.269
	67.237	0.064											21.407	0.128
	53.91	0.049											34.714	0.105
	59.545	0.079											32.241	0.134
	56.055	0.11											35.682	0.139
	66.036	0.074											23.684	0.235
	80.567	0.058											17.843	0.471
	42.325	0.075											20.156	0.069
	58.963	0.079											34.536	0.096
	53.685	0.074											33.42	0.098
	53.69	0.079											30.414	0.083
	58.783	0.068											7.013	136.992
	60.973	0.073											17.72	0.224
	59.192	0.103											31.297	0.078
	48.738	0.077											39.588	0.107
	72.848	0.121											25.9	0.076
	60.334	0.085											35.901	0.074
	60.875	0.058											26.488	0.107
	63.922	0.076											28.707	0.106
	67.198	0.064											36.529	0.074
	52.374	0.082											30.544	0.064
	67.8	0.076											30.532	0.106
	57.122	0.096											33.344	0.06
	50.668	0.088											39.5	0.069
	61.918	0.112											24.428	0.087
	62.035	0.066											24.923	0.056
	53.716	0.093											2.319	0.087
	63.371	0.068											25.997	0.063
	46.593	0.067											21.924	0.044
	64.707	0.079											4.595	76.023
	52.575	0.08											23.354	0.105
	63.461	0.075											28.809	0.072
	68.796	0.1											14.277	0.085
	56.461	0.066											32.537	0.092
	69.093	0.11											26.177	0.075
	56.184	0.098											25.164	0.089
	76.835	0.076											28.237	0.095
	61.952	0.056											29.823	0.072
	62.808	0.084											31.734	0.086
	70.12	0.081											29.775	0.112
	29.091	0.068											27.427	0.065
	48.672	0.096											35.405	0.089
	53.312	0.078											29.585	0.107
	53.264	0.072											6.257	117.333
	56.789	0.077											4.932	83.779
	51.019	0.097											33.751	0.329
	59.623	0.065											5.767	110.445
	58.061	0.089											21.251	0.073
	56.603	0.085											28.795	0.108
	63.591	0.069											0.951	0.259
	53.852	0.071											24.376	0.11
	63.106	0.086											1.086	0.128
	34.604	0.083											24.847	0.183
	54.828	0.065											1.169	0.087
	58.692	0.095											32.669	0.195
	51.287	0.088											38.573	0.121
	57.842	0.067											31.364	0.347
	60.347	0.048											32.024	0.168
	60.681	0.067											34.454	0.141
	50.712	0.061											25.214	0.133
	36.349	0.085											19.643	71.881
	52.094	0.082											5.718	0.032
	63.84	0.075											6.167	0.034
	42.48	0.093											0.362	0.041
	57.55	0.107											5.741	0.175
	58.12	0.06											4.908	0.184
	60.441	0.069											5.006	0.203
	46.205	0.079											5.79	0.025
	59.483	0.079											7.601	0.041
	59.401	0.075											7.817	0.03
	59.482	0.065											0.925	9.818
	43.168	0.073											0.769	9.395
	55.949	0.073											7.41	0.051
	49.55	0.072											6.137	0.297
	51.48	0.083											1.605	25.389
	61.4	0.057											0.36	0.407
	49.55	0.048											1.608	31.144
	54.762	0.074											1.77	32.872
	53.876	0.06											1.25	18.274
	43.211	0.079											1.969	33.097
	43.764	0.059											2.008	31.773
	63.76	0.068											2.872	40.385
	34.465	0.074											2.473	40.137
	9.327	148.872											1.79	32.129
	10.826	183.387											1.842	38.325
	13.435	214.471											2.681	56.747
	9.949	163.204											2.799	51.355
	12.076	194.405											2.395	43.775
	16.993	236.73											2.168	37.259
	58.414	0.074											2.226	37.04
	60.894	0.111											2.226	44.677
	56.421	0.069											2.722	53.871
	50.07	0.062											2.509	45.366
	65.318	0.063											1.805	34.809
	61.39	0.112											1.966	35.906
	70.268	0.067											1.889	40.243
	57.276	0.074											1.599	32.887
	57.901	0.083											2.198	38.918
	64.182	0.109											2.682	50.503
	75.477	0.086											2.319	42.984
	61.723	0.097											2.024	35.24
	68.797	0.104											1.432	27.247
	58.048	0.086											1.846	38.652
	60.016	0.072											2.421	52.54
	60.521	0.081											0.326	0.155
	57.765	0.072											1.238	22.229
	63.492	0.073											1.885	31.01
	53.994	0.068											1.694	33.818
	73.25	0.097											1.578	29.049
	62.031	0.084											1.792	31.818
	63.991	0.058											1.3	24.404
	55.34	0.073											2.173	39.158
	69.766	0.058											1.593	34.145
	69.35	0.067											1.636	34.477
	68.196	0.069											1.988	38.343
	63.103	0.051											1.474	27.729
	60.419	0.082											0.569	0.073
	70.09	0.099											2.158	45.547
	46.226	0.095											1.957	25.255
	56.29	0.093											0.421	0.202
	66.42	0.083											1.936	35.751
	64.351	0.093											1.41	24.633
	73.343	0.081											0.451	0.032
	60.03	0.051											1.666	24.12
	68.103	0.076											0.486	0.046
	72.188	0.095											2.473	16.804
	65.236	0.069											3.109	61.485
	61.346	0.065											0.213	0.152
	46.612	0.08											1.679	33.634
	55.599	0.083											5.017	0.251
	75.772	0.07											0.402	0.146
	71.946	0.065											0.235	0.262
	73.63	0.068
	57.903	0.078
	69.683	0.09
	70.194	0.085
	61.862	0.101
	66.882	0.101
	60.113	0.082
	62.808	0.091
	52.791	0.077
	72.322	0.064
	67.822	0.104
	68.053	0.068
	77.584	0.078
	65.68	0.084
	55.346	0.097
	36.597	0.071
	61.428	0.082
	64.343	0.09
	77.018	0.077
	61.777	0.067
	65.175	0.097
	71.171	0.058
	51.543	0.109
	64.272	0.068
	65.26	0.086
	6.913	0.162
	66.573	0.065
	37.823	0.073
	65.401	0.086
	52.457	0.061
	63.598	0.101
	66.91	0.055
	49.505	0.086
	51.371	0.071
	58.016	0.078
	59.879	0.061
	77.853	0.074
	49.674	0.047
	52.709	0.087
	61.338	0.081
	57.315	0.08
	58.125	0.097
	60.989	0.096
	61.015	0.058
	56.035	0.073
	62.979	0.085
	55.302	0.074
	76.523	0.084
	57.002	0.083
	61.928	0.066
	60.593	0.069
	40.695	0.082
	62.497	0.085
	58.077	0.079
	70.532	0.107
	53.883	0.076
	65.75	0.066
	44.279	0.059
	63.153	0.081
	55.925	0.07
	60.15	0.07
	45.264	0.083
	75.044	0.071
	67.577	0.087
	55.894	0.076
	58.751	0.067
	61.172	0.083
	60.914	0.081
	78.365	0.081
	52.2	0.091
	70.08	0.078
	69.071	0.045
	47.347	0.069
	68.424	0.093
	46.567	0.086
	79.034	0.063
	47.875	0.075
	61.374	0.084
	54.298	0.11
	64.785	0.074
	63.132	0.074
	45.748	0.066
	55.681	0.097
	65.85	0.076
	58.504	0.089
	64.479	0.066
	60.115	0.076
	73.587	0.098
	63.946	0.102
	63.037	0.11
	54.452	0.052
	64.719	0.105
	63.591	0.083
	67.237	0.064
	53.91	0.049
	59.545	0.079
	56.055	0.11
	66.036	0.074
	80.567	0.058
	42.325	0.075
	58.963	0.079
	53.685	0.074
	53.69	0.079
	58.783	0.068
	60.973	0.073
	59.192	0.103
	48.738	0.077
	72.848	0.121
	60.334	0.085
	60.875	0.058
	63.922	0.076
	67.198	0.064
	52.374	0.082
	67.8	0.076
	57.122	0.096
	50.668	0.088
	61.918	0.112
	62.035	0.066
	53.716	0.093
	63.371	0.068
	46.593	0.067
	64.707	0.079
	52.575	0.08
	63.461	0.075
	68.796	0.1
	56.461	0.066
	69.093	0.11
	56.184	0.098
	76.835	0.076
	61.952	0.056
	62.808	0.084
	70.12	0.081
	29.091	0.068
	48.672	0.096
	53.312	0.078
	53.264	0.072
	56.789	0.077
	51.019	0.097
	59.623	0.065
	58.061	0.089
	56.603	0.085
	63.591	0.069
	53.852	0.071
	63.106	0.086
	34.604	0.083
	54.828	0.065
	58.692	0.095
	51.287	0.088
	57.842	0.067
	60.347	0.048
	60.681	0.067
	50.712	0.061
	36.349	0.085
	52.094	0.082
	63.84	0.075
	42.48	0.093
	57.55	0.107
	58.12	0.06
	60.441	0.069
	46.205	0.079
	59.483	0.079
	59.401	0.075
	59.482	0.065
	43.168	0.073
	55.949	0.073
	49.55	0.072
	51.48	0.083
	61.4	0.057
	49.55	0.048
	54.762	0.074
	53.876	0.06
	43.211	0.079
	43.764	0.059
	63.76	0.068
	34.465	0.074
	9.327	148.872
	10.826	183.387
	13.435	214.471
	9.949	163.204
	12.076	194.405
	16.993	236.73
	1.173	0.278
	0.726	0.108
	2.052	0.367
	1.425	0.107
	25.161	0.084
	37.589	0.189
	15.029	0.041
	16.832	0.129
	20.956	0.144
	17.366	0.056
	22.539	0.082
	38.229	0.191
	2.725	0.172
	41.684	0.187
	21.161	0.092
	20.947	0.086
	4.673	0.24
	33.406	0.083
	45.693	0.1
	22.925	0.092
	11.494	0.04
	10.976	0.104
	35.013	0.087
	1.112	0.208
	35.935	0.173
	19.621	0.174
	30.6	0.086
	20.374	0.13
	33.465	0.111
	39.149	0.095
	46.311	0.059
	44.936	0.095
	40.529	0.147
	11.747	0.197
	15.382	0.186
	45.305	0.124
	34.858	0.128
	1.107	0.705
	19.062	0.118
	32.811	0.078
	24.602	0.173
	25.393	0.144
	5.8	0.627
	21.67	0.083
	25.935	0.162
	39.848	0.14
	36.251	0.138
	33.795	0.121
	34.609	0.114
	6.021	1.171
	27.444	0.112
	27.479	0.169
	3.613	0.105
	48.636	0.087
	37.454	0.115
	37.269	0.129
	33.328	0.163
	42.131	0.094
	31.141	0.147
	40.137	0.149
	37.417	0.144
	26.878	0.129
	10.855	0.105
	31.208	0.167
	42.55	0.102
	2.431	0.214
	23.89	0.102
	42.369	0.267
	31.381	0.138
	11.467	0.231
	40.207	0.181
	2.666	0.245
	28.332	0.125
	35.961	0.145
	32.985	0.14
	36.089	0.106
	35.964	0.109
	45.058	0.079
	31.347	0.146
	36.218	0.109
	31.476	0.125
	30.093	0.185
	52.497	0.14
	31.362	0.112
	23.729	0.181
	34.366	0.101
	17.889	0.366
	27.011	0.161
	38.209	0.151
	35.26	0.132
	25.722	0.114
	39.061	0.118
	42.525	0.136
	18.412	0.16
	47.479	0.146
	35.237	0.233
	42.142	0.124
	52.017	0.153
	17.764	0.12
	39.684	0.156
	42.729	0.082
	14.554	0.269
	37.099	0.139
	29.886	0.06
	32.018	0.159
	41.482	0.149
	45.947	0.116
	41.921	0.177
	22.078	0.135
	34.75	0.15
	46.338	0.139
	39.86	0.144
	26.146	0.121
	36.164	0.27
	38.018	0.121
	25.315	0.132
	40.779	0.134
	29.753	0.175
	39.619	0.127
	41.058	0.218
	15.032	0.123
	23.844	0.179
	39.899	0.103
	40.029	0.122
	44.06	0.186
	29.316	0.142
	34.905	0.128
	30.333	0.124
	25.18	0.177
	40.26	0.106
	34.349	0.103
	35.384	0.154
	30.5	0.112
	30.915	0.133
	36.091	0.155
	36.699	0.117
	33.954	0.138
	27.103	0.119
	45.352	0.155
	31.794	0.107
	30.543	0.103
	16.423	0.181
	52.025	0.137
	32.175	0.156
	42.321	0.169
	37.41	0.148
	37.037	0.109
	49.504	0.105
	43.97	0.127
	41.376	0.143
	41.569	0.116
	35.781	0.096
	38.001	0.207
	39.744	0.133
	38.177	0.126
	41.01	0.173
	32.657	0.099
	42.535	0.141
	32.121	0.214
	44.866	0.099
	34.752	0.174
	17.741	0.089
	31.004	0.189
	37.541	0.238
	61.398	0.251
	29.638	0.14
	47.182	0.123
	27.694	0.127
	40.643	0.11
	38.644	0.107
	32.028	0.114
	50.396	0.147
	18.438	0.156
	3.261	0.201
	35.711	0.091
	10.444	0.149
	49.609	0.116
	40.944	0.122
	36.184	0.094
	31.076	0.131
	35.817	0.114
	37.014	0.101
	50.168	0.224
	41.272	0.107
	35.061	0.1
	24.773	0.151
	30.896	0.101
	12.191	0.161
	41.243	0.148
	42.342	0.169
	46.508	0.112
	35.909	0.117
	41.963	0.135
	51.966	0.122
	43.242	0.286
	31.69	0.162
	41.147	0.12
	35.631	0.114
	30.807	0.142
	34.656	0.094
	5.592	19.193
	18.879	0.08
	31.533	0.115
	19.678	0.061
	24.095	0.085
	16.353	0.076
	20.115	0.156
	21.996	0.048
	19.329	0.112
	15.915	0.055
	27.885	0.069
	16.985	0.101
	22.043	0.083
	19.136	0.157
	26.731	0.077
	26.432	0.09
	29.798	0.056
	17.877	0.078
	25.497	0.045
	33.419	0.068
	22.948	0.07
	15.057	0.195
	26.663	0.059
	25.064	0.061
	24.724	0.066
	32.174	0.157
	22.873	0.059
	34.917	0.116
	22.697	0.079
	17.298	0.107
	27.007	0.051
	27.169	0.057
	19.835	0.059
	32.834	0.098
	12.314	0.084
	33.313	0.09
	21.21	0.073
	34.919	0.098
	15.84	0.102
	19.86	0.055
	30.069	0.057
	15.553	0.173
	35.908	0.095
	22.008	0.061
	25.571	0.044
	26.459	0.075
	21.272	0.093
	16.395	0.076
	28.982	0.092
	29.904	0.083
	30.649	0.099
	70.994	0.07
	32.237	0.116
	18.771	0.09
	27.833	0.105
	24.052	0.122
	17.379	0.125
	24.202	0.07
	22.742	0.056
	34.475	0.107
	29.54	0.071
	36.716	0.076
	35.016	0.079
	28.275	0.087
	23.956	0.085
	32.961	0.1
	18.912	0.072
	27.095	0.107
	19.178	0.098
	31.941	0.091
	25.225	0.123
	35.303	0.075
	33.136	0.14
	25.977	0.119
	35.668	0.588
	42.526	0.106
	5.152	0.167
	33.09	0.058
	33.638	0.102
	28.175	0.161
	25.811	0.087
	8.507	0.122
	9.089	0.079
	22.359	0.086
	2.929	0.431
	2.684	0.362
	3.218	0.634
	16.049	162.003
	18.759	1.96
	12.437	0.603
	18.47	161.524
	22.409	189.403
	21.551	0.547
	21.894	0.804
	22.029	178.009
	28.107	232.403
	29.856	230.556
	21.421	0.323
	17.27	137.412
	21.354	148.576
	21.37	0.885
	21.294	0.55
	25.528	186.305
	24.38	0.641
	22.208	1.894
	20.304	179.427
	25.76	133.351
	24.056	217.597
	39.551	244.365
	28.238	185.146
	24.108	205.452
	41.648	243.086
	29.666	185.339
	23.226	236.195
	19.858	229.282
	21.317	170.216
	15.672	176.381
	33.365	220.978
	20.84	222.614
	17.885	209.368

## Sheet: F1FS1F
																				Compare cell means regardless of rows and columns
hESC						hEPSC						Rset								Number of families	1
EXP1	DMSO - Control	Relative	JAKi	Relative		EXP1	DMSO - Control	Relative	DMSO - JAKi	Relative		EXP1	DMSO - Control	Relative	DMSO - JAKi	Relative				Number of comparisons per family	861
Day 0	10000	1	10000	1		Day 0	10000	1	10000	1		Day 0	10000	1	10000	1				Alpha	0.05
Day 1	8750	0.875	6875	0.6875		Day 1	23750	2.375	16250	1.625		Day 1	25000	2.5	16875	1.6875
Day 2	26250	2.625	13125	1.3125		Day 2	45000	4.5	23750	2.375		Day 2	43750	4.375	26875	2.6875				Tukey's multiple comparisons test	Mean Diff.	95.00% CI of diff.	Significant?	Summary	Adjusted P Value
Day 3	34375	3.4375	20625	2.0625		Day 3	71875	7.1875	30000	3		Day 3	150000	15	40625	4.0625
Day 4	72500	7.25	10000	1		Day 4	185000	18.5	20000	2		Day 4	342500	34.25	56875	5.6875				Row 1:hEPSC + ACL vs. Row 1:Rset + ACL	0	-29.89 to 29.89	No	ns	>0.9999
Day 5	159375	15.9375	4375	0.4375		Day 5	324375	32.4375	12500	1.25		Day 5	458750	45.875	66250	6.625				Row 1:hEPSC + ACL vs. Row 1:hEPSC +ACLi	0	-29.89 to 29.89	No	ns	>0.9999
Day 6	397500	39.75	9375	0.9375		Day 6	348125	34.8125	6250	0.625		Day 6	728750	72.875	45000	4.5				Row 1:hEPSC + ACL vs. Row 1:Rset + ACLi	0	-29.89 to 29.89	No	ns	>0.9999
EXP2	DMSO - Control	Relative	JAKi	Relative		EXP2	DMSO - Control	Relative	JAKi	Relative		EXP2	DMSO - Control	Relative	JAKi	Relative				Row 1:hEPSC + ACL vs. Row 1:hESC +ACL	0	-29.89 to 29.89	No	ns	>0.9999
Day 0	10000	1	10000	1		Day 0	10000	1	10000	1		Day 0	10000	1	10000	1				Row 1:hEPSC + ACL vs. Row 1:hESC + ACLi	0	-29.89 to 29.89	No	ns	>0.9999
Day 1	16250	1.625	6250	0.625		Day 1	45000	4.5	23125	2.3125		Day 1	31875	3.1875	21325	2.1325				Row 1:hEPSC + ACL vs. Row 2:hEPSC + ACL	-2.271	-32.16 to 27.62	No	ns	>0.9999
Day 2	26875	2.6875	12500	1.25		Day 2	186125	18.6125	27500	2.75		Day 2	58750	5.875	49375	4.9375				Row 1:hEPSC + ACL vs. Row 2:Rset + ACL	-2.313	-32.2 to 27.58	No	ns	>0.9999
Day 3	44375	4.4375	6250	0.625		Day 3	376250	37.625	33125	3.3125		Day 3	280625	28.0625	118125	11.8125				Row 1:hEPSC + ACL vs. Row 2:hEPSC +ACLi	-0.9792	-30.87 to 28.91	No	ns	>0.9999
Day 4	98125	9.8125	8750	0.875		Day 4	401875	40.1875	43125	4.3125		Day 4	700000	70	107500	10.75				Row 1:hEPSC + ACL vs. Row 2:Rset + ACLi	-1.065	-30.96 to 28.83	No	ns	>0.9999
Day 5	188125	18.8125	13125	1.3125		Day 5	561875	56.1875	21875	2.1875		Day 5	816250	81.625	100000	10				Row 1:hEPSC + ACL vs. Row 2:hESC +ACL	-0.85	-30.74 to 29.04	No	ns	>0.9999
Day 6	495625	49.5625	9375	0.9375		Day 6	700625	70.0625	10000	1		Day 6	780000	78	83750	8.375				Row 1:hEPSC + ACL vs. Row 2:hESC + ACLi	0.1042	-29.79 to 29.99	No	ns	>0.9999
EXP3	DMSO - Control	Relative	JAKi	Relative		EXP3	DMSO - Control	Relative	JAKi	Relative		EXP3	DMSO - Control	Relative	JAKi	Relative				Row 1:hEPSC + ACL vs. Row 3:hEPSC + ACL	-8.558	-38.45 to 21.33	No	ns	>0.9999
Day 0	10000	1	10000	1		Day 0	10000	1	10000	1		Day 0	10000	1	10000	1				Row 1:hEPSC + ACL vs. Row 3:Rset + ACL	-9.792	-39.68 to 20.1	No	ns	>0.9999
Day 1	30500	3.05	13750	1.375		Day 1	29375	2.9375	20000	2		Day 1	42500	4.25	23750	2.375				Row 1:hEPSC + ACL vs. Row 3:hEPSC +ACLi	-1.563	-31.45 to 28.33	No	ns	>0.9999
Day 2	61250	6.125	16250	1.625		Day 2	55625	5.5625	25625	2.5625		Day 2	221250	22.125	80625	8.0625				Row 1:hEPSC + ACL vs. Row 3:Rset + ACLi	-4.229	-34.12 to 25.66	No	ns	>0.9999
Day 3	146250	14.625	16250	1.625		Day 3	105625	10.5625	29375	2.9375		Day 3	336250	33.625	100000	10				Row 1:hEPSC + ACL vs. Row 3:hESC +ACL	-2.813	-32.7 to 27.08	No	ns	>0.9999
Day 4	285000	28.5	14375	1.4375		Day 4	348125	34.8125	48125	4.8125		Day 4	677500	67.75	75625	7.5625				Row 1:hEPSC + ACL vs. Row 3:hESC + ACLi	-0.3958	-30.29 to 29.49	No	ns	>0.9999
Day 5	635625	63.5625	15625	1.5625		Day 5	432500	43.25	47500	4.75		Day 5	858750	85.875	85000	8.5				Row 1:hEPSC + ACL vs. Row 4:hEPSC + ACL	-17.46	-47.35 to 12.43	No	ns	0.934
Day 6	790000	79	14375	1.4375		Day 6	487500	48.75	18125	1.8125		Day 6	623750	62.375	56875	5.6875				Row 1:hEPSC + ACL vs. Row 4:Rset + ACL	-24.56	-54.45 to 5.328	No	ns	0.3105
AVERAGE	DMSO - Control relative	JAKi - relative				AVERAGE	DMSO - Control relative	JAKi - relative				AVERAGE	DMSO - Control relative	JAKi - relative						Row 1:hEPSC + ACL vs. Row 4:hEPSC +ACLi	-2.083	-31.97 to 27.81	No	ns	>0.9999
Day 0	1	1				Day 0	1	1				Day 0	1	1						Row 1:hEPSC + ACL vs. Row 4:Rset + ACLi	-7.625	-37.52 to 22.27	No	ns	>0.9999
Day 1	1.85	0.895833				Day 1	3.27083	1.97917				Day 1	3.3125	2.065						Row 1:hEPSC + ACL vs. Row 4:hESC +ACL	-6.5	-36.39 to 23.39	No	ns	>0.9999
Day 2	3.8125	1.39583				Day 2	9.55833	2.5625				Day 2	10.7917	5.22917						Row 1:hEPSC + ACL vs. Row 4:hESC + ACLi	-0.4375	-30.33 to 29.45	No	ns	>0.9999
Day 3	7.5	1.4375				Day 3	18.4583	3.08333				Day 3	25.5625	8.625						Row 1:hEPSC + ACL vs. Row 5:hEPSC + ACL	-30.17	-60.06 to -0.2759	Yes	*	0.0447
Day 4	15.1875	1.10417				Day 4	31.1667	3.70833				Day 4	57.3333	8						Row 1:hEPSC + ACL vs. Row 5:Rset + ACL	-56.33	-86.22 to -26.44	Yes	****	<0.0001
Day 5	32.7708	1.10417				Day 5	43.9583	2.72917				Day 5	71.125	8.375						Row 1:hEPSC + ACL vs. Row 5:hEPSC +ACLi	-2.708	-32.6 to 27.18	No	ns	>0.9999
Day 6	56.1042	1.10417				Day 6	51.2083	1.14583				Day 6	71.0833	6.1875						Row 1:hEPSC + ACL vs. Row 5:Rset + ACLi	-7	-36.89 to 22.89	No	ns	>0.9999
																				Row 1:hEPSC + ACL vs. Row 5:hESC +ACL	-14.19	-44.08 to 15.7	No	ns	0.9966
																				Row 1:hEPSC + ACL vs. Row 5:hESC + ACLi	-0.1042	-29.99 to 29.79	No	ns	>0.9999
																				Row 1:hEPSC + ACL vs. Row 6:hEPSC + ACL	-42.96	-72.85 to -13.07	Yes	****	<0.0001
																				Row 1:hEPSC + ACL vs. Row 6:Rset + ACL	-70.13	-100 to -40.23	Yes	****	<0.0001
																				Row 1:hEPSC + ACL vs. Row 6:hEPSC +ACLi	-1.729	-31.62 to 28.16	No	ns	>0.9999
																				Row 1:hEPSC + ACL vs. Row 6:Rset + ACLi	-7.375	-37.27 to 22.52	No	ns	>0.9999
																				Row 1:hEPSC + ACL vs. Row 6:hESC +ACL	-31.77	-61.66 to -1.88	Yes	*	0.0226
																				Row 1:hEPSC + ACL vs. Row 6:hESC + ACLi	-0.1042	-29.99 to 29.79	No	ns	>0.9999
																				Row 1:hEPSC + ACL vs. Row 7:hEPSC + ACL	-50.21	-80.1 to -20.32	Yes	****	<0.0001
																				Row 1:hEPSC + ACL vs. Row 7:Rset + ACL	-70.08	-99.97 to -40.19	Yes	****	<0.0001
																				Row 1:hEPSC + ACL vs. Row 7:hEPSC +ACLi	-0.1458	-30.04 to 29.74	No	ns	>0.9999
																				Row 1:hEPSC + ACL vs. Row 7:Rset + ACLi	-5.188	-35.08 to 24.7	No	ns	>0.9999
																				Row 1:hEPSC + ACL vs. Row 7:hESC +ACL	-55.1	-84.99 to -25.21	Yes	****	<0.0001
																				Row 1:hEPSC + ACL vs. Row 7:hESC + ACLi	-0.1042	-29.99 to 29.79	No	ns	>0.9999
																				Row 1:Rset + ACL vs. Row 1:hEPSC +ACLi	0	-29.89 to 29.89	No	ns	>0.9999
																				Row 1:Rset + ACL vs. Row 1:Rset + ACLi	0	-29.89 to 29.89	No	ns	>0.9999
																				Row 1:Rset + ACL vs. Row 1:hESC +ACL	0	-29.89 to 29.89	No	ns	>0.9999
																				Row 1:Rset + ACL vs. Row 1:hESC + ACLi	0	-29.89 to 29.89	No	ns	>0.9999
																				Row 1:Rset + ACL vs. Row 2:hEPSC + ACL	-2.271	-32.16 to 27.62	No	ns	>0.9999
																				Row 1:Rset + ACL vs. Row 2:Rset + ACL	-2.313	-32.2 to 27.58	No	ns	>0.9999
																				Row 1:Rset + ACL vs. Row 2:hEPSC +ACLi	-0.9792	-30.87 to 28.91	No	ns	>0.9999
																				Row 1:Rset + ACL vs. Row 2:Rset + ACLi	-1.065	-30.96 to 28.83	No	ns	>0.9999
																				Row 1:Rset + ACL vs. Row 2:hESC +ACL	-0.85	-30.74 to 29.04	No	ns	>0.9999
																				Row 1:Rset + ACL vs. Row 2:hESC + ACLi	0.1042	-29.79 to 29.99	No	ns	>0.9999
																				Row 1:Rset + ACL vs. Row 3:hEPSC + ACL	-8.558	-38.45 to 21.33	No	ns	>0.9999
																				Row 1:Rset + ACL vs. Row 3:Rset + ACL	-9.792	-39.68 to 20.1	No	ns	>0.9999
																				Row 1:Rset + ACL vs. Row 3:hEPSC +ACLi	-1.563	-31.45 to 28.33	No	ns	>0.9999
																				Row 1:Rset + ACL vs. Row 3:Rset + ACLi	-4.229	-34.12 to 25.66	No	ns	>0.9999
																				Row 1:Rset + ACL vs. Row 3:hESC +ACL	-2.813	-32.7 to 27.08	No	ns	>0.9999
																				Row 1:Rset + ACL vs. Row 3:hESC + ACLi	-0.3958	-30.29 to 29.49	No	ns	>0.9999
																				Row 1:Rset + ACL vs. Row 4:hEPSC + ACL	-17.46	-47.35 to 12.43	No	ns	0.934
																				Row 1:Rset + ACL vs. Row 4:Rset + ACL	-24.56	-54.45 to 5.328	No	ns	0.3105
																				Row 1:Rset + ACL vs. Row 4:hEPSC +ACLi	-2.083	-31.97 to 27.81	No	ns	>0.9999
																				Row 1:Rset + ACL vs. Row 4:Rset + ACLi	-7.625	-37.52 to 22.27	No	ns	>0.9999
																				Row 1:Rset + ACL vs. Row 4:hESC +ACL	-6.5	-36.39 to 23.39	No	ns	>0.9999
																				Row 1:Rset + ACL vs. Row 4:hESC + ACLi	-0.4375	-30.33 to 29.45	No	ns	>0.9999
																				Row 1:Rset + ACL vs. Row 5:hEPSC + ACL	-30.17	-60.06 to -0.2759	Yes	*	0.0447
																				Row 1:Rset + ACL vs. Row 5:Rset + ACL	-56.33	-86.22 to -26.44	Yes	****	<0.0001
																				Row 1:Rset + ACL vs. Row 5:hEPSC +ACLi	-2.708	-32.6 to 27.18	No	ns	>0.9999
																				Row 1:Rset + ACL vs. Row 5:Rset + ACLi	-7	-36.89 to 22.89	No	ns	>0.9999
																				Row 1:Rset + ACL vs. Row 5:hESC +ACL	-14.19	-44.08 to 15.7	No	ns	0.9966
																				Row 1:Rset + ACL vs. Row 5:hESC + ACLi	-0.1042	-29.99 to 29.79	No	ns	>0.9999
																				Row 1:Rset + ACL vs. Row 6:hEPSC + ACL	-42.96	-72.85 to -13.07	Yes	****	<0.0001
																				Row 1:Rset + ACL vs. Row 6:Rset + ACL	-70.13	-100 to -40.23	Yes	****	<0.0001
																				Row 1:Rset + ACL vs. Row 6:hEPSC +ACLi	-1.729	-31.62 to 28.16	No	ns	>0.9999
																				Row 1:Rset + ACL vs. Row 6:Rset + ACLi	-7.375	-37.27 to 22.52	No	ns	>0.9999
																				Row 1:Rset + ACL vs. Row 6:hESC +ACL	-31.77	-61.66 to -1.88	Yes	*	0.0226
																				Row 1:Rset + ACL vs. Row 6:hESC + ACLi	-0.1042	-29.99 to 29.79	No	ns	>0.9999
																				Row 1:Rset + ACL vs. Row 7:hEPSC + ACL	-50.21	-80.1 to -20.32	Yes	****	<0.0001
																				Row 1:Rset + ACL vs. Row 7:Rset + ACL	-70.08	-99.97 to -40.19	Yes	****	<0.0001
																				Row 1:Rset + ACL vs. Row 7:hEPSC +ACLi	-0.1458	-30.04 to 29.74	No	ns	>0.9999
																				Row 1:Rset + ACL vs. Row 7:Rset + ACLi	-5.188	-35.08 to 24.7	No	ns	>0.9999
																				Row 1:Rset + ACL vs. Row 7:hESC +ACL	-55.1	-84.99 to -25.21	Yes	****	<0.0001
																				Row 1:Rset + ACL vs. Row 7:hESC + ACLi	-0.1042	-29.99 to 29.79	No	ns	>0.9999
																				Row 1:hEPSC +ACLi vs. Row 1:Rset + ACLi	0	-29.89 to 29.89	No	ns	>0.9999
																				Row 1:hEPSC +ACLi vs. Row 1:hESC +ACL	0	-29.89 to 29.89	No	ns	>0.9999
																				Row 1:hEPSC +ACLi vs. Row 1:hESC + ACLi	0	-29.89 to 29.89	No	ns	>0.9999
																				Row 1:hEPSC +ACLi vs. Row 2:hEPSC + ACL	-2.271	-32.16 to 27.62	No	ns	>0.9999
																				Row 1:hEPSC +ACLi vs. Row 2:Rset + ACL	-2.313	-32.2 to 27.58	No	ns	>0.9999
																				Row 1:hEPSC +ACLi vs. Row 2:hEPSC +ACLi	-0.9792	-30.87 to 28.91	No	ns	>0.9999
																				Row 1:hEPSC +ACLi vs. Row 2:Rset + ACLi	-1.065	-30.96 to 28.83	No	ns	>0.9999
																				Row 1:hEPSC +ACLi vs. Row 2:hESC +ACL	-0.85	-30.74 to 29.04	No	ns	>0.9999
																				Row 1:hEPSC +ACLi vs. Row 2:hESC + ACLi	0.1042	-29.79 to 29.99	No	ns	>0.9999
																				Row 1:hEPSC +ACLi vs. Row 3:hEPSC + ACL	-8.558	-38.45 to 21.33	No	ns	>0.9999
																				Row 1:hEPSC +ACLi vs. Row 3:Rset + ACL	-9.792	-39.68 to 20.1	No	ns	>0.9999
																				Row 1:hEPSC +ACLi vs. Row 3:hEPSC +ACLi	-1.563	-31.45 to 28.33	No	ns	>0.9999
																				Row 1:hEPSC +ACLi vs. Row 3:Rset + ACLi	-4.229	-34.12 to 25.66	No	ns	>0.9999
																				Row 1:hEPSC +ACLi vs. Row 3:hESC +ACL	-2.813	-32.7 to 27.08	No	ns	>0.9999
																				Row 1:hEPSC +ACLi vs. Row 3:hESC + ACLi	-0.3958	-30.29 to 29.49	No	ns	>0.9999
																				Row 1:hEPSC +ACLi vs. Row 4:hEPSC + ACL	-17.46	-47.35 to 12.43	No	ns	0.934
																				Row 1:hEPSC +ACLi vs. Row 4:Rset + ACL	-24.56	-54.45 to 5.328	No	ns	0.3105
																				Row 1:hEPSC +ACLi vs. Row 4:hEPSC +ACLi	-2.083	-31.97 to 27.81	No	ns	>0.9999
																				Row 1:hEPSC +ACLi vs. Row 4:Rset + ACLi	-7.625	-37.52 to 22.27	No	ns	>0.9999
																				Row 1:hEPSC +ACLi vs. Row 4:hESC +ACL	-6.5	-36.39 to 23.39	No	ns	>0.9999
																				Row 1:hEPSC +ACLi vs. Row 4:hESC + ACLi	-0.4375	-30.33 to 29.45	No	ns	>0.9999
																				Row 1:hEPSC +ACLi vs. Row 5:hEPSC + ACL	-30.17	-60.06 to -0.2759	Yes	*	0.0447
																				Row 1:hEPSC +ACLi vs. Row 5:Rset + ACL	-56.33	-86.22 to -26.44	Yes	****	<0.0001
																				Row 1:hEPSC +ACLi vs. Row 5:hEPSC +ACLi	-2.708	-32.6 to 27.18	No	ns	>0.9999
																				Row 1:hEPSC +ACLi vs. Row 5:Rset + ACLi	-7	-36.89 to 22.89	No	ns	>0.9999
																				Row 1:hEPSC +ACLi vs. Row 5:hESC +ACL	-14.19	-44.08 to 15.7	No	ns	0.9966
																				Row 1:hEPSC +ACLi vs. Row 5:hESC + ACLi	-0.1042	-29.99 to 29.79	No	ns	>0.9999
																				Row 1:hEPSC +ACLi vs. Row 6:hEPSC + ACL	-42.96	-72.85 to -13.07	Yes	****	<0.0001
																				Row 1:hEPSC +ACLi vs. Row 6:Rset + ACL	-70.13	-100 to -40.23	Yes	****	<0.0001
																				Row 1:hEPSC +ACLi vs. Row 6:hEPSC +ACLi	-1.729	-31.62 to 28.16	No	ns	>0.9999
																				Row 1:hEPSC +ACLi vs. Row 6:Rset + ACLi	-7.375	-37.27 to 22.52	No	ns	>0.9999
																				Row 1:hEPSC +ACLi vs. Row 6:hESC +ACL	-31.77	-61.66 to -1.88	Yes	*	0.0226
																				Row 1:hEPSC +ACLi vs. Row 6:hESC + ACLi	-0.1042	-29.99 to 29.79	No	ns	>0.9999
																				Row 1:hEPSC +ACLi vs. Row 7:hEPSC + ACL	-50.21	-80.1 to -20.32	Yes	****	<0.0001
																				Row 1:hEPSC +ACLi vs. Row 7:Rset + ACL	-70.08	-99.97 to -40.19	Yes	****	<0.0001
																				Row 1:hEPSC +ACLi vs. Row 7:hEPSC +ACLi	-0.1458	-30.04 to 29.74	No	ns	>0.9999
																				Row 1:hEPSC +ACLi vs. Row 7:Rset + ACLi	-5.188	-35.08 to 24.7	No	ns	>0.9999
																				Row 1:hEPSC +ACLi vs. Row 7:hESC +ACL	-55.1	-84.99 to -25.21	Yes	****	<0.0001
																				Row 1:hEPSC +ACLi vs. Row 7:hESC + ACLi	-0.1042	-29.99 to 29.79	No	ns	>0.9999
																				Row 1:Rset + ACLi vs. Row 1:hESC +ACL	0	-29.89 to 29.89	No	ns	>0.9999
																				Row 1:Rset + ACLi vs. Row 1:hESC + ACLi	0	-29.89 to 29.89	No	ns	>0.9999
																				Row 1:Rset + ACLi vs. Row 2:hEPSC + ACL	-2.271	-32.16 to 27.62	No	ns	>0.9999
																				Row 1:Rset + ACLi vs. Row 2:Rset + ACL	-2.313	-32.2 to 27.58	No	ns	>0.9999
																				Row 1:Rset + ACLi vs. Row 2:hEPSC +ACLi	-0.9792	-30.87 to 28.91	No	ns	>0.9999
																				Row 1:Rset + ACLi vs. Row 2:Rset + ACLi	-1.065	-30.96 to 28.83	No	ns	>0.9999
																				Row 1:Rset + ACLi vs. Row 2:hESC +ACL	-0.85	-30.74 to 29.04	No	ns	>0.9999
																				Row 1:Rset + ACLi vs. Row 2:hESC + ACLi	0.1042	-29.79 to 29.99	No	ns	>0.9999
																				Row 1:Rset + ACLi vs. Row 3:hEPSC + ACL	-8.558	-38.45 to 21.33	No	ns	>0.9999
																				Row 1:Rset + ACLi vs. Row 3:Rset + ACL	-9.792	-39.68 to 20.1	No	ns	>0.9999
																				Row 1:Rset + ACLi vs. Row 3:hEPSC +ACLi	-1.563	-31.45 to 28.33	No	ns	>0.9999
																				Row 1:Rset + ACLi vs. Row 3:Rset + ACLi	-4.229	-34.12 to 25.66	No	ns	>0.9999
																				Row 1:Rset + ACLi vs. Row 3:hESC +ACL	-2.813	-32.7 to 27.08	No	ns	>0.9999
																				Row 1:Rset + ACLi vs. Row 3:hESC + ACLi	-0.3958	-30.29 to 29.49	No	ns	>0.9999
																				Row 1:Rset + ACLi vs. Row 4:hEPSC + ACL	-17.46	-47.35 to 12.43	No	ns	0.934
																				Row 1:Rset + ACLi vs. Row 4:Rset + ACL	-24.56	-54.45 to 5.328	No	ns	0.3105
																				Row 1:Rset + ACLi vs. Row 4:hEPSC +ACLi	-2.083	-31.97 to 27.81	No	ns	>0.9999
																				Row 1:Rset + ACLi vs. Row 4:Rset + ACLi	-7.625	-37.52 to 22.27	No	ns	>0.9999
																				Row 1:Rset + ACLi vs. Row 4:hESC +ACL	-6.5	-36.39 to 23.39	No	ns	>0.9999
																				Row 1:Rset + ACLi vs. Row 4:hESC + ACLi	-0.4375	-30.33 to 29.45	No	ns	>0.9999
																				Row 1:Rset + ACLi vs. Row 5:hEPSC + ACL	-30.17	-60.06 to -0.2759	Yes	*	0.0447
																				Row 1:Rset + ACLi vs. Row 5:Rset + ACL	-56.33	-86.22 to -26.44	Yes	****	<0.0001
																				Row 1:Rset + ACLi vs. Row 5:hEPSC +ACLi	-2.708	-32.6 to 27.18	No	ns	>0.9999
																				Row 1:Rset + ACLi vs. Row 5:Rset + ACLi	-7	-36.89 to 22.89	No	ns	>0.9999
																				Row 1:Rset + ACLi vs. Row 5:hESC +ACL	-14.19	-44.08 to 15.7	No	ns	0.9966
																				Row 1:Rset + ACLi vs. Row 5:hESC + ACLi	-0.1042	-29.99 to 29.79	No	ns	>0.9999
																				Row 1:Rset + ACLi vs. Row 6:hEPSC + ACL	-42.96	-72.85 to -13.07	Yes	****	<0.0001
																				Row 1:Rset + ACLi vs. Row 6:Rset + ACL	-70.13	-100 to -40.23	Yes	****	<0.0001
																				Row 1:Rset + ACLi vs. Row 6:hEPSC +ACLi	-1.729	-31.62 to 28.16	No	ns	>0.9999
																				Row 1:Rset + ACLi vs. Row 6:Rset + ACLi	-7.375	-37.27 to 22.52	No	ns	>0.9999
																				Row 1:Rset + ACLi vs. Row 6:hESC +ACL	-31.77	-61.66 to -1.88	Yes	*	0.0226
																				Row 1:Rset + ACLi vs. Row 6:hESC + ACLi	-0.1042	-29.99 to 29.79	No	ns	>0.9999
																				Row 1:Rset + ACLi vs. Row 7:hEPSC + ACL	-50.21	-80.1 to -20.32	Yes	****	<0.0001
																				Row 1:Rset + ACLi vs. Row 7:Rset + ACL	-70.08	-99.97 to -40.19	Yes	****	<0.0001
																				Row 1:Rset + ACLi vs. Row 7:hEPSC +ACLi	-0.1458	-30.04 to 29.74	No	ns	>0.9999
																				Row 1:Rset + ACLi vs. Row 7:Rset + ACLi	-5.188	-35.08 to 24.7	No	ns	>0.9999
																				Row 1:Rset + ACLi vs. Row 7:hESC +ACL	-55.1	-84.99 to -25.21	Yes	****	<0.0001
																				Row 1:Rset + ACLi vs. Row 7:hESC + ACLi	-0.1042	-29.99 to 29.79	No	ns	>0.9999
																				Row 1:hESC +ACL vs. Row 1:hESC + ACLi	0	-29.89 to 29.89	No	ns	>0.9999
																				Row 1:hESC +ACL vs. Row 2:hEPSC + ACL	-2.271	-32.16 to 27.62	No	ns	>0.9999
																				Row 1:hESC +ACL vs. Row 2:Rset + ACL	-2.313	-32.2 to 27.58	No	ns	>0.9999
																				Row 1:hESC +ACL vs. Row 2:hEPSC +ACLi	-0.9792	-30.87 to 28.91	No	ns	>0.9999
																				Row 1:hESC +ACL vs. Row 2:Rset + ACLi	-1.065	-30.96 to 28.83	No	ns	>0.9999
																				Row 1:hESC +ACL vs. Row 2:hESC +ACL	-0.85	-30.74 to 29.04	No	ns	>0.9999
																				Row 1:hESC +ACL vs. Row 2:hESC + ACLi	0.1042	-29.79 to 29.99	No	ns	>0.9999
																				Row 1:hESC +ACL vs. Row 3:hEPSC + ACL	-8.558	-38.45 to 21.33	No	ns	>0.9999
																				Row 1:hESC +ACL vs. Row 3:Rset + ACL	-9.792	-39.68 to 20.1	No	ns	>0.9999
																				Row 1:hESC +ACL vs. Row 3:hEPSC +ACLi	-1.563	-31.45 to 28.33	No	ns	>0.9999
																				Row 1:hESC +ACL vs. Row 3:Rset + ACLi	-4.229	-34.12 to 25.66	No	ns	>0.9999
																				Row 1:hESC +ACL vs. Row 3:hESC +ACL	-2.813	-32.7 to 27.08	No	ns	>0.9999
																				Row 1:hESC +ACL vs. Row 3:hESC + ACLi	-0.3958	-30.29 to 29.49	No	ns	>0.9999
																				Row 1:hESC +ACL vs. Row 4:hEPSC + ACL	-17.46	-47.35 to 12.43	No	ns	0.934
																				Row 1:hESC +ACL vs. Row 4:Rset + ACL	-24.56	-54.45 to 5.328	No	ns	0.3105
																				Row 1:hESC +ACL vs. Row 4:hEPSC +ACLi	-2.083	-31.97 to 27.81	No	ns	>0.9999
																				Row 1:hESC +ACL vs. Row 4:Rset + ACLi	-7.625	-37.52 to 22.27	No	ns	>0.9999
																				Row 1:hESC +ACL vs. Row 4:hESC +ACL	-6.5	-36.39 to 23.39	No	ns	>0.9999
																				Row 1:hESC +ACL vs. Row 4:hESC + ACLi	-0.4375	-30.33 to 29.45	No	ns	>0.9999
																				Row 1:hESC +ACL vs. Row 5:hEPSC + ACL	-30.17	-60.06 to -0.2759	Yes	*	0.0447
																				Row 1:hESC +ACL vs. Row 5:Rset + ACL	-56.33	-86.22 to -26.44	Yes	****	<0.0001
																				Row 1:hESC +ACL vs. Row 5:hEPSC +ACLi	-2.708	-32.6 to 27.18	No	ns	>0.9999
																				Row 1:hESC +ACL vs. Row 5:Rset + ACLi	-7	-36.89 to 22.89	No	ns	>0.9999
																				Row 1:hESC +ACL vs. Row 5:hESC +ACL	-14.19	-44.08 to 15.7	No	ns	0.9966
																				Row 1:hESC +ACL vs. Row 5:hESC + ACLi	-0.1042	-29.99 to 29.79	No	ns	>0.9999
																				Row 1:hESC +ACL vs. Row 6:hEPSC + ACL	-42.96	-72.85 to -13.07	Yes	****	<0.0001
																				Row 1:hESC +ACL vs. Row 6:Rset + ACL	-70.13	-100 to -40.23	Yes	****	<0.0001
																				Row 1:hESC +ACL vs. Row 6:hEPSC +ACLi	-1.729	-31.62 to 28.16	No	ns	>0.9999
																				Row 1:hESC +ACL vs. Row 6:Rset + ACLi	-7.375	-37.27 to 22.52	No	ns	>0.9999
																				Row 1:hESC +ACL vs. Row 6:hESC +ACL	-31.77	-61.66 to -1.88	Yes	*	0.0226
																				Row 1:hESC +ACL vs. Row 6:hESC + ACLi	-0.1042	-29.99 to 29.79	No	ns	>0.9999
																				Row 1:hESC +ACL vs. Row 7:hEPSC + ACL	-50.21	-80.1 to -20.32	Yes	****	<0.0001
																				Row 1:hESC +ACL vs. Row 7:Rset + ACL	-70.08	-99.97 to -40.19	Yes	****	<0.0001
																				Row 1:hESC +ACL vs. Row 7:hEPSC +ACLi	-0.1458	-30.04 to 29.74	No	ns	>0.9999
																				Row 1:hESC +ACL vs. Row 7:Rset + ACLi	-5.188	-35.08 to 24.7	No	ns	>0.9999
																				Row 1:hESC +ACL vs. Row 7:hESC +ACL	-55.1	-84.99 to -25.21	Yes	****	<0.0001
																				Row 1:hESC +ACL vs. Row 7:hESC + ACLi	-0.1042	-29.99 to 29.79	No	ns	>0.9999
																				Row 1:hESC + ACLi vs. Row 2:hEPSC + ACL	-2.271	-32.16 to 27.62	No	ns	>0.9999
																				Row 1:hESC + ACLi vs. Row 2:Rset + ACL	-2.313	-32.2 to 27.58	No	ns	>0.9999
																				Row 1:hESC + ACLi vs. Row 2:hEPSC +ACLi	-0.9792	-30.87 to 28.91	No	ns	>0.9999
																				Row 1:hESC + ACLi vs. Row 2:Rset + ACLi	-1.065	-30.96 to 28.83	No	ns	>0.9999
																				Row 1:hESC + ACLi vs. Row 2:hESC +ACL	-0.85	-30.74 to 29.04	No	ns	>0.9999
																				Row 1:hESC + ACLi vs. Row 2:hESC + ACLi	0.1042	-29.79 to 29.99	No	ns	>0.9999
																				Row 1:hESC + ACLi vs. Row 3:hEPSC + ACL	-8.558	-38.45 to 21.33	No	ns	>0.9999
																				Row 1:hESC + ACLi vs. Row 3:Rset + ACL	-9.792	-39.68 to 20.1	No	ns	>0.9999
																				Row 1:hESC + ACLi vs. Row 3:hEPSC +ACLi	-1.563	-31.45 to 28.33	No	ns	>0.9999
																				Row 1:hESC + ACLi vs. Row 3:Rset + ACLi	-4.229	-34.12 to 25.66	No	ns	>0.9999
																				Row 1:hESC + ACLi vs. Row 3:hESC +ACL	-2.813	-32.7 to 27.08	No	ns	>0.9999
																				Row 1:hESC + ACLi vs. Row 3:hESC + ACLi	-0.3958	-30.29 to 29.49	No	ns	>0.9999
																				Row 1:hESC + ACLi vs. Row 4:hEPSC + ACL	-17.46	-47.35 to 12.43	No	ns	0.934
																				Row 1:hESC + ACLi vs. Row 4:Rset + ACL	-24.56	-54.45 to 5.328	No	ns	0.3105
																				Row 1:hESC + ACLi vs. Row 4:hEPSC +ACLi	-2.083	-31.97 to 27.81	No	ns	>0.9999
																				Row 1:hESC + ACLi vs. Row 4:Rset + ACLi	-7.625	-37.52 to 22.27	No	ns	>0.9999
																				Row 1:hESC + ACLi vs. Row 4:hESC +ACL	-6.5	-36.39 to 23.39	No	ns	>0.9999
																				Row 1:hESC + ACLi vs. Row 4:hESC + ACLi	-0.4375	-30.33 to 29.45	No	ns	>0.9999
																				Row 1:hESC + ACLi vs. Row 5:hEPSC + ACL	-30.17	-60.06 to -0.2759	Yes	*	0.0447
																				Row 1:hESC + ACLi vs. Row 5:Rset + ACL	-56.33	-86.22 to -26.44	Yes	****	<0.0001
																				Row 1:hESC + ACLi vs. Row 5:hEPSC +ACLi	-2.708	-32.6 to 27.18	No	ns	>0.9999
																				Row 1:hESC + ACLi vs. Row 5:Rset + ACLi	-7	-36.89 to 22.89	No	ns	>0.9999
																				Row 1:hESC + ACLi vs. Row 5:hESC +ACL	-14.19	-44.08 to 15.7	No	ns	0.9966
																				Row 1:hESC + ACLi vs. Row 5:hESC + ACLi	-0.1042	-29.99 to 29.79	No	ns	>0.9999
																				Row 1:hESC + ACLi vs. Row 6:hEPSC + ACL	-42.96	-72.85 to -13.07	Yes	****	<0.0001
																				Row 1:hESC + ACLi vs. Row 6:Rset + ACL	-70.13	-100 to -40.23	Yes	****	<0.0001
																				Row 1:hESC + ACLi vs. Row 6:hEPSC +ACLi	-1.729	-31.62 to 28.16	No	ns	>0.9999
																				Row 1:hESC + ACLi vs. Row 6:Rset + ACLi	-7.375	-37.27 to 22.52	No	ns	>0.9999
																				Row 1:hESC + ACLi vs. Row 6:hESC +ACL	-31.77	-61.66 to -1.88	Yes	*	0.0226
																				Row 1:hESC + ACLi vs. Row 6:hESC + ACLi	-0.1042	-29.99 to 29.79	No	ns	>0.9999
																				Row 1:hESC + ACLi vs. Row 7:hEPSC + ACL	-50.21	-80.1 to -20.32	Yes	****	<0.0001
																				Row 1:hESC + ACLi vs. Row 7:Rset + ACL	-70.08	-99.97 to -40.19	Yes	****	<0.0001
																				Row 1:hESC + ACLi vs. Row 7:hEPSC +ACLi	-0.1458	-30.04 to 29.74	No	ns	>0.9999
																				Row 1:hESC + ACLi vs. Row 7:Rset + ACLi	-5.188	-35.08 to 24.7	No	ns	>0.9999
																				Row 1:hESC + ACLi vs. Row 7:hESC +ACL	-55.1	-84.99 to -25.21	Yes	****	<0.0001
																				Row 1:hESC + ACLi vs. Row 7:hESC + ACLi	-0.1042	-29.99 to 29.79	No	ns	>0.9999
																				Row 2:hEPSC + ACL vs. Row 2:Rset + ACL	-0.04167	-29.93 to 29.85	No	ns	>0.9999
																				Row 2:hEPSC + ACL vs. Row 2:hEPSC +ACLi	1.292	-28.6 to 31.18	No	ns	>0.9999
																				Row 2:hEPSC + ACL vs. Row 2:Rset + ACLi	1.206	-28.68 to 31.1	No	ns	>0.9999
																				Row 2:hEPSC + ACL vs. Row 2:hESC +ACL	1.421	-28.47 to 31.31	No	ns	>0.9999
																				Row 2:hEPSC + ACL vs. Row 2:hESC + ACLi	2.375	-27.52 to 32.27	No	ns	>0.9999
																				Row 2:hEPSC + ACL vs. Row 3:hEPSC + ACL	-6.288	-36.18 to 23.6	No	ns	>0.9999
																				Row 2:hEPSC + ACL vs. Row 3:Rset + ACL	-7.521	-37.41 to 22.37	No	ns	>0.9999
																				Row 2:hEPSC + ACL vs. Row 3:hEPSC +ACLi	0.7083	-29.18 to 30.6	No	ns	>0.9999
																				Row 2:hEPSC + ACL vs. Row 3:Rset + ACLi	-1.958	-31.85 to 27.93	No	ns	>0.9999
																				Row 2:hEPSC + ACL vs. Row 3:hESC +ACL	-0.5417	-30.43 to 29.35	No	ns	>0.9999
																				Row 2:hEPSC + ACL vs. Row 3:hESC + ACLi	1.875	-28.02 to 31.77	No	ns	>0.9999
																				Row 2:hEPSC + ACL vs. Row 4:hEPSC + ACL	-15.19	-45.08 to 14.7	No	ns	0.9897
																				Row 2:hEPSC + ACL vs. Row 4:Rset + ACL	-22.29	-52.18 to 7.599	No	ns	0.5296
																				Row 2:hEPSC + ACL vs. Row 4:hEPSC +ACLi	0.1875	-29.7 to 30.08	No	ns	>0.9999
																				Row 2:hEPSC + ACL vs. Row 4:Rset + ACLi	-5.354	-35.24 to 24.54	No	ns	>0.9999
																				Row 2:hEPSC + ACL vs. Row 4:hESC +ACL	-4.229	-34.12 to 25.66	No	ns	>0.9999
																				Row 2:hEPSC + ACL vs. Row 4:hESC + ACLi	1.833	-28.06 to 31.72	No	ns	>0.9999
																				Row 2:hEPSC + ACL vs. Row 5:hEPSC + ACL	-27.9	-57.79 to 1.995	No	ns	0.1075
																				Row 2:hEPSC + ACL vs. Row 5:Rset + ACL	-54.06	-83.95 to -24.17	Yes	****	<0.0001
																				Row 2:hEPSC + ACL vs. Row 5:hEPSC +ACLi	-0.4375	-30.33 to 29.45	No	ns	>0.9999
																				Row 2:hEPSC + ACL vs. Row 5:Rset + ACLi	-4.729	-34.62 to 25.16	No	ns	>0.9999
																				Row 2:hEPSC + ACL vs. Row 5:hESC +ACL	-11.92	-41.81 to 17.97	No	ns	0.9999
																				Row 2:hEPSC + ACL vs. Row 5:hESC + ACLi	2.167	-27.72 to 32.06	No	ns	>0.9999
																				Row 2:hEPSC + ACL vs. Row 6:hEPSC + ACL	-40.69	-70.58 to -10.8	Yes	***	0.0003
																				Row 2:hEPSC + ACL vs. Row 6:Rset + ACL	-67.85	-97.74 to -37.96	Yes	****	<0.0001
																				Row 2:hEPSC + ACL vs. Row 6:hEPSC +ACLi	0.5417	-29.35 to 30.43	No	ns	>0.9999
																				Row 2:hEPSC + ACL vs. Row 6:Rset + ACLi	-5.104	-34.99 to 24.79	No	ns	>0.9999
																				Row 2:hEPSC + ACL vs. Row 6:hESC +ACL	-29.5	-59.39 to 0.3908	No	ns	0.0585
																				Row 2:hEPSC + ACL vs. Row 6:hESC + ACLi	2.167	-27.72 to 32.06	No	ns	>0.9999
																				Row 2:hEPSC + ACL vs. Row 7:hEPSC + ACL	-47.94	-77.83 to -18.05	Yes	****	<0.0001
																				Row 2:hEPSC + ACL vs. Row 7:Rset + ACL	-67.81	-97.7 to -37.92	Yes	****	<0.0001
																				Row 2:hEPSC + ACL vs. Row 7:hEPSC +ACLi	2.125	-27.77 to 32.02	No	ns	>0.9999
																				Row 2:hEPSC + ACL vs. Row 7:Rset + ACLi	-2.917	-32.81 to 26.97	No	ns	>0.9999
																				Row 2:hEPSC + ACL vs. Row 7:hESC +ACL	-52.83	-82.72 to -22.94	Yes	****	<0.0001
																				Row 2:hEPSC + ACL vs. Row 7:hESC + ACLi	2.167	-27.72 to 32.06	No	ns	>0.9999
																				Row 2:Rset + ACL vs. Row 2:hEPSC +ACLi	1.333	-28.56 to 31.22	No	ns	>0.9999
																				Row 2:Rset + ACL vs. Row 2:Rset + ACLi	1.248	-28.64 to 31.14	No	ns	>0.9999
																				Row 2:Rset + ACL vs. Row 2:hESC +ACL	1.463	-28.43 to 31.35	No	ns	>0.9999
																				Row 2:Rset + ACL vs. Row 2:hESC + ACLi	2.417	-27.47 to 32.31	No	ns	>0.9999
																				Row 2:Rset + ACL vs. Row 3:hEPSC + ACL	-6.246	-36.14 to 23.64	No	ns	>0.9999
																				Row 2:Rset + ACL vs. Row 3:Rset + ACL	-7.479	-37.37 to 22.41	No	ns	>0.9999
																				Row 2:Rset + ACL vs. Row 3:hEPSC +ACLi	0.75	-29.14 to 30.64	No	ns	>0.9999
																				Row 2:Rset + ACL vs. Row 3:Rset + ACLi	-1.917	-31.81 to 27.97	No	ns	>0.9999
																				Row 2:Rset + ACL vs. Row 3:hESC +ACL	-0.5	-30.39 to 29.39	No	ns	>0.9999
																				Row 2:Rset + ACL vs. Row 3:hESC + ACLi	1.917	-27.97 to 31.81	No	ns	>0.9999
																				Row 2:Rset + ACL vs. Row 4:hEPSC + ACL	-15.15	-45.04 to 14.74	No	ns	0.9902
																				Row 2:Rset + ACL vs. Row 4:Rset + ACL	-22.25	-52.14 to 7.641	No	ns	0.5339
																				Row 2:Rset + ACL vs. Row 4:hEPSC +ACLi	0.2292	-29.66 to 30.12	No	ns	>0.9999
																				Row 2:Rset + ACL vs. Row 4:Rset + ACLi	-5.313	-35.2 to 24.58	No	ns	>0.9999
																				Row 2:Rset + ACL vs. Row 4:hESC +ACL	-4.188	-34.08 to 25.7	No	ns	>0.9999
																				Row 2:Rset + ACL vs. Row 4:hESC + ACLi	1.875	-28.02 to 31.77	No	ns	>0.9999
																				Row 2:Rset + ACL vs. Row 5:hEPSC + ACL	-27.85	-57.74 to 2.037	No	ns	0.1091
																				Row 2:Rset + ACL vs. Row 5:Rset + ACL	-54.02	-83.91 to -24.13	Yes	****	<0.0001
																				Row 2:Rset + ACL vs. Row 5:hEPSC +ACLi	-0.3958	-30.29 to 29.49	No	ns	>0.9999
																				Row 2:Rset + ACL vs. Row 5:Rset + ACLi	-4.688	-34.58 to 25.2	No	ns	>0.9999
																				Row 2:Rset + ACL vs. Row 5:hESC +ACL	-11.88	-41.77 to 18.02	No	ns	0.9999
																				Row 2:Rset + ACL vs. Row 5:hESC + ACLi	2.208	-27.68 to 32.1	No	ns	>0.9999
																				Row 2:Rset + ACL vs. Row 6:hEPSC + ACL	-40.65	-70.54 to -10.76	Yes	***	0.0003
																				Row 2:Rset + ACL vs. Row 6:Rset + ACL	-67.81	-97.7 to -37.92	Yes	****	<0.0001
																				Row 2:Rset + ACL vs. Row 6:hEPSC +ACLi	0.5833	-29.31 to 30.47	No	ns	>0.9999
																				Row 2:Rset + ACL vs. Row 6:Rset + ACLi	-5.063	-34.95 to 24.83	No	ns	>0.9999
																				Row 2:Rset + ACL vs. Row 6:hESC +ACL	-29.46	-59.35 to 0.4325	No	ns	0.0595
																				Row 2:Rset + ACL vs. Row 6:hESC + ACLi	2.208	-27.68 to 32.1	No	ns	>0.9999
																				Row 2:Rset + ACL vs. Row 7:hEPSC + ACL	-47.9	-77.79 to -18.01	Yes	****	<0.0001
																				Row 2:Rset + ACL vs. Row 7:Rset + ACL	-67.77	-97.66 to -37.88	Yes	****	<0.0001
																				Row 2:Rset + ACL vs. Row 7:hEPSC +ACLi	2.167	-27.72 to 32.06	No	ns	>0.9999
																				Row 2:Rset + ACL vs. Row 7:Rset + ACLi	-2.875	-32.77 to 27.02	No	ns	>0.9999
																				Row 2:Rset + ACL vs. Row 7:hESC +ACL	-52.79	-82.68 to -22.9	Yes	****	<0.0001
																				Row 2:Rset + ACL vs. Row 7:hESC + ACLi	2.208	-27.68 to 32.1	No	ns	>0.9999
																				Row 2:hEPSC +ACLi vs. Row 2:Rset + ACLi	-0.08583	-29.98 to 29.8	No	ns	>0.9999
																				Row 2:hEPSC +ACLi vs. Row 2:hESC +ACL	0.1292	-29.76 to 30.02	No	ns	>0.9999
																				Row 2:hEPSC +ACLi vs. Row 2:hESC + ACLi	1.083	-28.81 to 30.97	No	ns	>0.9999
																				Row 2:hEPSC +ACLi vs. Row 3:hEPSC + ACL	-7.579	-37.47 to 22.31	No	ns	>0.9999
																				Row 2:hEPSC +ACLi vs. Row 3:Rset + ACL	-8.813	-38.7 to 21.08	No	ns	>0.9999
																				Row 2:hEPSC +ACLi vs. Row 3:hEPSC +ACLi	-0.5833	-30.47 to 29.31	No	ns	>0.9999
																				Row 2:hEPSC +ACLi vs. Row 3:Rset + ACLi	-3.25	-33.14 to 26.64	No	ns	>0.9999
																				Row 2:hEPSC +ACLi vs. Row 3:hESC +ACL	-1.833	-31.72 to 28.06	No	ns	>0.9999
																				Row 2:hEPSC +ACLi vs. Row 3:hESC + ACLi	0.5833	-29.31 to 30.47	No	ns	>0.9999
																				Row 2:hEPSC +ACLi vs. Row 4:hEPSC + ACL	-16.48	-46.37 to 13.41	No	ns	0.9673
																				Row 2:hEPSC +ACLi vs. Row 4:Rset + ACL	-23.58	-53.47 to 6.307	No	ns	0.3989
																				Row 2:hEPSC +ACLi vs. Row 4:hEPSC +ACLi	-1.104	-30.99 to 28.79	No	ns	>0.9999
																				Row 2:hEPSC +ACLi vs. Row 4:Rset + ACLi	-6.646	-36.54 to 23.24	No	ns	>0.9999
																				Row 2:hEPSC +ACLi vs. Row 4:hESC +ACL	-5.521	-35.41 to 24.37	No	ns	>0.9999
																				Row 2:hEPSC +ACLi vs. Row 4:hESC + ACLi	0.5417	-29.35 to 30.43	No	ns	>0.9999
																				Row 2:hEPSC +ACLi vs. Row 5:hEPSC + ACL	-29.19	-59.08 to 0.7033	No	ns	0.0661
																				Row 2:hEPSC +ACLi vs. Row 5:Rset + ACL	-55.35	-85.24 to -25.46	Yes	****	<0.0001
																				Row 2:hEPSC +ACLi vs. Row 5:hEPSC +ACLi	-1.729	-31.62 to 28.16	No	ns	>0.9999
																				Row 2:hEPSC +ACLi vs. Row 5:Rset + ACLi	-6.021	-35.91 to 23.87	No	ns	>0.9999
																				Row 2:hEPSC +ACLi vs. Row 5:hESC +ACL	-13.21	-43.1 to 16.68	No	ns	0.9991
																				Row 2:hEPSC +ACLi vs. Row 5:hESC + ACLi	0.875	-29.02 to 30.77	No	ns	>0.9999
																				Row 2:hEPSC +ACLi vs. Row 6:hEPSC + ACL	-41.98	-71.87 to -12.09	Yes	***	0.0001
																				Row 2:hEPSC +ACLi vs. Row 6:Rset + ACL	-69.15	-99.04 to -39.26	Yes	****	<0.0001
																				Row 2:hEPSC +ACLi vs. Row 6:hEPSC +ACLi	-0.75	-30.64 to 29.14	No	ns	>0.9999
																				Row 2:hEPSC +ACLi vs. Row 6:Rset + ACLi	-6.396	-36.29 to 23.49	No	ns	>0.9999
																				Row 2:hEPSC +ACLi vs. Row 6:hESC +ACL	-30.79	-60.68 to -0.9009	Yes	*	0.0345
																				Row 2:hEPSC +ACLi vs. Row 6:hESC + ACLi	0.875	-29.02 to 30.77	No	ns	>0.9999
																				Row 2:hEPSC +ACLi vs. Row 7:hEPSC + ACL	-49.23	-79.12 to -19.34	Yes	****	<0.0001
																				Row 2:hEPSC +ACLi vs. Row 7:Rset + ACL	-69.1	-98.99 to -39.21	Yes	****	<0.0001
																				Row 2:hEPSC +ACLi vs. Row 7:hEPSC +ACLi	0.8333	-29.06 to 30.72	No	ns	>0.9999
																				Row 2:hEPSC +ACLi vs. Row 7:Rset + ACLi	-4.208	-34.1 to 25.68	No	ns	>0.9999
																				Row 2:hEPSC +ACLi vs. Row 7:hESC +ACL	-54.13	-84.02 to -24.23	Yes	****	<0.0001
																				Row 2:hEPSC +ACLi vs. Row 7:hESC + ACLi	0.875	-29.02 to 30.77	No	ns	>0.9999
																				Row 2:Rset + ACLi vs. Row 2:hESC +ACL	0.215	-29.68 to 30.11	No	ns	>0.9999
																				Row 2:Rset + ACLi vs. Row 2:hESC + ACLi	1.169	-28.72 to 31.06	No	ns	>0.9999
																				Row 2:Rset + ACLi vs. Row 3:hEPSC + ACL	-7.493	-37.38 to 22.4	No	ns	>0.9999
																				Row 2:Rset + ACLi vs. Row 3:Rset + ACL	-8.727	-38.62 to 21.16	No	ns	>0.9999
																				Row 2:Rset + ACLi vs. Row 3:hEPSC +ACLi	-0.4975	-30.39 to 29.39	No	ns	>0.9999
																				Row 2:Rset + ACLi vs. Row 3:Rset + ACLi	-3.164	-33.05 to 26.73	No	ns	>0.9999
																				Row 2:Rset + ACLi vs. Row 3:hESC +ACL	-1.748	-31.64 to 28.14	No	ns	>0.9999
																				Row 2:Rset + ACLi vs. Row 3:hESC + ACLi	0.6692	-29.22 to 30.56	No	ns	>0.9999
																				Row 2:Rset + ACLi vs. Row 4:hEPSC + ACL	-16.39	-46.28 to 13.5	No	ns	0.9695
																				Row 2:Rset + ACLi vs. Row 4:Rset + ACL	-23.5	-53.39 to 6.393	No	ns	0.4072
																				Row 2:Rset + ACLi vs. Row 4:hEPSC +ACLi	-1.018	-30.91 to 28.87	No	ns	>0.9999
																				Row 2:Rset + ACLi vs. Row 4:Rset + ACLi	-6.56	-36.45 to 23.33	No	ns	>0.9999
																				Row 2:Rset + ACLi vs. Row 4:hESC +ACL	-5.435	-35.33 to 24.46	No	ns	>0.9999
																				Row 2:Rset + ACLi vs. Row 4:hESC + ACLi	0.6275	-29.26 to 30.52	No	ns	>0.9999
																				Row 2:Rset + ACLi vs. Row 5:hEPSC + ACL	-29.1	-58.99 to 0.7891	No	ns	0.0684
																				Row 2:Rset + ACLi vs. Row 5:Rset + ACL	-55.27	-85.16 to -25.38	Yes	****	<0.0001
																				Row 2:Rset + ACLi vs. Row 5:hEPSC +ACLi	-1.643	-31.53 to 28.25	No	ns	>0.9999
																				Row 2:Rset + ACLi vs. Row 5:Rset + ACLi	-5.935	-35.83 to 23.96	No	ns	>0.9999
																				Row 2:Rset + ACLi vs. Row 5:hESC +ACL	-13.12	-43.01 to 16.77	No	ns	0.9992
																				Row 2:Rset + ACLi vs. Row 5:hESC + ACLi	0.9608	-28.93 to 30.85	No	ns	>0.9999
																				Row 2:Rset + ACLi vs. Row 6:hEPSC + ACL	-41.89	-71.78 to -12	Yes	***	0.0001
																				Row 2:Rset + ACLi vs. Row 6:Rset + ACL	-69.06	-98.95 to -39.17	Yes	****	<0.0001
																				Row 2:Rset + ACLi vs. Row 6:hEPSC +ACLi	-0.6642	-30.55 to 29.23	No	ns	>0.9999
																				Row 2:Rset + ACLi vs. Row 6:Rset + ACLi	-6.31	-36.2 to 23.58	No	ns	>0.9999
																				Row 2:Rset + ACLi vs. Row 6:hESC +ACL	-30.71	-60.6 to -0.815	Yes	*	0.0357
																				Row 2:Rset + ACLi vs. Row 6:hESC + ACLi	0.9608	-28.93 to 30.85	No	ns	>0.9999
																				Row 2:Rset + ACLi vs. Row 7:hEPSC + ACL	-49.14	-79.03 to -19.25	Yes	****	<0.0001
																				Row 2:Rset + ACLi vs. Row 7:Rset + ACL	-69.02	-98.91 to -39.13	Yes	****	<0.0001
																				Row 2:Rset + ACLi vs. Row 7:hEPSC +ACLi	0.9192	-28.97 to 30.81	No	ns	>0.9999
																				Row 2:Rset + ACLi vs. Row 7:Rset + ACLi	-4.123	-34.01 to 25.77	No	ns	>0.9999
																				Row 2:Rset + ACLi vs. Row 7:hESC +ACL	-54.04	-83.93 to -24.15	Yes	****	<0.0001
																				Row 2:Rset + ACLi vs. Row 7:hESC + ACLi	0.9608	-28.93 to 30.85	No	ns	>0.9999
																				Row 2:hESC +ACL vs. Row 2:hESC + ACLi	0.9542	-28.94 to 30.84	No	ns	>0.9999
																				Row 2:hESC +ACL vs. Row 3:hEPSC + ACL	-7.708	-37.6 to 22.18	No	ns	>0.9999
																				Row 2:hESC +ACL vs. Row 3:Rset + ACL	-8.942	-38.83 to 20.95	No	ns	>0.9999
																				Row 2:hESC +ACL vs. Row 3:hEPSC +ACLi	-0.7125	-30.6 to 29.18	No	ns	>0.9999
																				Row 2:hESC +ACL vs. Row 3:Rset + ACLi	-3.379	-33.27 to 26.51	No	ns	>0.9999
																				Row 2:hESC +ACL vs. Row 3:hESC +ACL	-1.963	-31.85 to 27.93	No	ns	>0.9999
																				Row 2:hESC +ACL vs. Row 3:hESC + ACLi	0.4542	-29.44 to 30.34	No	ns	>0.9999
																				Row 2:hESC +ACL vs. Row 4:hEPSC + ACL	-16.61	-46.5 to 13.28	No	ns	0.9639
																				Row 2:hESC +ACL vs. Row 4:Rset + ACL	-23.71	-53.6 to 6.178	No	ns	0.3866
																				Row 2:hESC +ACL vs. Row 4:hEPSC +ACLi	-1.233	-31.12 to 28.66	No	ns	>0.9999
																				Row 2:hESC +ACL vs. Row 4:Rset + ACLi	-6.775	-36.67 to 23.12	No	ns	>0.9999
																				Row 2:hESC +ACL vs. Row 4:hESC +ACL	-5.65	-35.54 to 24.24	No	ns	>0.9999
																				Row 2:hESC +ACL vs. Row 4:hESC + ACLi	0.4125	-29.48 to 30.3	No	ns	>0.9999
																				Row 2:hESC +ACL vs. Row 5:hEPSC + ACL	-29.32	-59.21 to 0.5741	No	ns	0.0629
																				Row 2:hESC +ACL vs. Row 5:Rset + ACL	-55.48	-85.37 to -25.59	Yes	****	<0.0001
																				Row 2:hESC +ACL vs. Row 5:hEPSC +ACLi	-1.858	-31.75 to 28.03	No	ns	>0.9999
																				Row 2:hESC +ACL vs. Row 5:Rset + ACLi	-6.15	-36.04 to 23.74	No	ns	>0.9999
																				Row 2:hESC +ACL vs. Row 5:hESC +ACL	-13.34	-43.23 to 16.55	No	ns	0.9989
																				Row 2:hESC +ACL vs. Row 5:hESC + ACLi	0.7458	-29.14 to 30.64	No	ns	>0.9999
																				Row 2:hESC +ACL vs. Row 6:hEPSC + ACL	-42.11	-72 to -12.22	Yes	***	0.0001
																				Row 2:hESC +ACL vs. Row 6:Rset + ACL	-69.28	-99.17 to -39.38	Yes	****	<0.0001
																				Row 2:hESC +ACL vs. Row 6:hEPSC +ACLi	-0.8792	-30.77 to 29.01	No	ns	>0.9999
																				Row 2:hESC +ACL vs. Row 6:Rset + ACLi	-6.525	-36.42 to 23.37	No	ns	>0.9999
																				Row 2:hESC +ACL vs. Row 6:hESC +ACL	-30.92	-60.81 to -1.03	Yes	*	0.0326
																				Row 2:hESC +ACL vs. Row 6:hESC + ACLi	0.7458	-29.14 to 30.64	No	ns	>0.9999
																				Row 2:hESC +ACL vs. Row 7:hEPSC + ACL	-49.36	-79.25 to -19.47	Yes	****	<0.0001
																				Row 2:hESC +ACL vs. Row 7:Rset + ACL	-69.23	-99.12 to -39.34	Yes	****	<0.0001
																				Row 2:hESC +ACL vs. Row 7:hEPSC +ACLi	0.7042	-29.19 to 30.59	No	ns	>0.9999
																				Row 2:hESC +ACL vs. Row 7:Rset + ACLi	-4.338	-34.23 to 25.55	No	ns	>0.9999
																				Row 2:hESC +ACL vs. Row 7:hESC +ACL	-54.25	-84.14 to -24.36	Yes	****	<0.0001
																				Row 2:hESC +ACL vs. Row 7:hESC + ACLi	0.7458	-29.14 to 30.64	No	ns	>0.9999
																				Row 2:hESC + ACLi vs. Row 3:hEPSC + ACL	-8.663	-38.55 to 21.23	No	ns	>0.9999
																				Row 2:hESC + ACLi vs. Row 3:Rset + ACL	-9.896	-39.79 to 19.99	No	ns	>0.9999
																				Row 2:hESC + ACLi vs. Row 3:hEPSC +ACLi	-1.667	-31.56 to 28.22	No	ns	>0.9999
																				Row 2:hESC + ACLi vs. Row 3:Rset + ACLi	-4.333	-34.22 to 25.56	No	ns	>0.9999
																				Row 2:hESC + ACLi vs. Row 3:hESC +ACL	-2.917	-32.81 to 26.97	No	ns	>0.9999
																				Row 2:hESC + ACLi vs. Row 3:hESC + ACLi	-0.5	-30.39 to 29.39	No	ns	>0.9999
																				Row 2:hESC + ACLi vs. Row 4:hEPSC + ACL	-17.56	-47.45 to 12.33	No	ns	0.9294
																				Row 2:hESC + ACLi vs. Row 4:Rset + ACL	-24.67	-54.56 to 5.224	No	ns	0.3018
																				Row 2:hESC + ACLi vs. Row 4:hEPSC +ACLi	-2.188	-32.08 to 27.7	No	ns	>0.9999
																				Row 2:hESC + ACLi vs. Row 4:Rset + ACLi	-7.729	-37.62 to 22.16	No	ns	>0.9999
																				Row 2:hESC + ACLi vs. Row 4:hESC +ACL	-6.604	-36.49 to 23.29	No	ns	>0.9999
																				Row 2:hESC + ACLi vs. Row 4:hESC + ACLi	-0.5417	-30.43 to 29.35	No	ns	>0.9999
																				Row 2:hESC + ACLi vs. Row 5:hEPSC + ACL	-30.27	-60.16 to -0.38	Yes	*	0.0428
																				Row 2:hESC + ACLi vs. Row 5:Rset + ACL	-56.44	-86.33 to -26.55	Yes	****	<0.0001
																				Row 2:hESC + ACLi vs. Row 5:hEPSC +ACLi	-2.813	-32.7 to 27.08	No	ns	>0.9999
																				Row 2:hESC + ACLi vs. Row 5:Rset + ACLi	-7.104	-36.99 to 22.79	No	ns	>0.9999
																				Row 2:hESC + ACLi vs. Row 5:hESC +ACL	-14.29	-44.18 to 15.6	No	ns	0.9962
																				Row 2:hESC + ACLi vs. Row 5:hESC + ACLi	-0.2083	-30.1 to 29.68	No	ns	>0.9999
																				Row 2:hESC + ACLi vs. Row 6:hEPSC + ACL	-43.06	-72.95 to -13.17	Yes	****	<0.0001
																				Row 2:hESC + ACLi vs. Row 6:Rset + ACL	-70.23	-100.1 to -40.34	Yes	****	<0.0001
																				Row 2:hESC + ACLi vs. Row 6:hEPSC +ACLi	-1.833	-31.72 to 28.06	No	ns	>0.9999
																				Row 2:hESC + ACLi vs. Row 6:Rset + ACLi	-7.479	-37.37 to 22.41	No	ns	>0.9999
																				Row 2:hESC + ACLi vs. Row 6:hESC +ACL	-31.88	-61.77 to -1.984	Yes	*	0.0216
																				Row 2:hESC + ACLi vs. Row 6:hESC + ACLi	-0.2083	-30.1 to 29.68	No	ns	>0.9999
																				Row 2:hESC + ACLi vs. Row 7:hEPSC + ACL	-50.31	-80.2 to -20.42	Yes	****	<0.0001
																				Row 2:hESC + ACLi vs. Row 7:Rset + ACL	-70.19	-100.1 to -40.3	Yes	****	<0.0001
																				Row 2:hESC + ACLi vs. Row 7:hEPSC +ACLi	-0.25	-30.14 to 29.64	No	ns	>0.9999
																				Row 2:hESC + ACLi vs. Row 7:Rset + ACLi	-5.292	-35.18 to 24.6	No	ns	>0.9999
																				Row 2:hESC + ACLi vs. Row 7:hESC +ACL	-55.21	-85.1 to -25.32	Yes	****	<0.0001
																				Row 2:hESC + ACLi vs. Row 7:hESC + ACLi	-0.2083	-30.1 to 29.68	No	ns	>0.9999
																				Row 3:hEPSC + ACL vs. Row 3:Rset + ACL	-1.233	-31.12 to 28.66	No	ns	>0.9999
																				Row 3:hEPSC + ACL vs. Row 3:hEPSC +ACLi	6.996	-22.89 to 36.89	No	ns	>0.9999
																				Row 3:hEPSC + ACL vs. Row 3:Rset + ACLi	4.329	-25.56 to 34.22	No	ns	>0.9999
																				Row 3:hEPSC + ACL vs. Row 3:hESC +ACL	5.746	-24.14 to 35.64	No	ns	>0.9999
																				Row 3:hEPSC + ACL vs. Row 3:hESC + ACLi	8.163	-21.73 to 38.05	No	ns	>0.9999
																				Row 3:hEPSC + ACL vs. Row 4:hEPSC + ACL	-8.9	-38.79 to 20.99	No	ns	>0.9999
																				Row 3:hEPSC + ACL vs. Row 4:Rset + ACL	-16	-45.89 to 13.89	No	ns	0.9779
																				Row 3:hEPSC + ACL vs. Row 4:hEPSC +ACLi	6.475	-23.42 to 36.37	No	ns	>0.9999
																				Row 3:hEPSC + ACL vs. Row 4:Rset + ACLi	0.9333	-28.96 to 30.82	No	ns	>0.9999
																				Row 3:hEPSC + ACL vs. Row 4:hESC +ACL	2.058	-27.83 to 31.95	No	ns	>0.9999
																				Row 3:hEPSC + ACL vs. Row 4:hESC + ACLi	8.121	-21.77 to 38.01	No	ns	>0.9999
																				Row 3:hEPSC + ACL vs. Row 5:hEPSC + ACL	-21.61	-51.5 to 8.282	No	ns	0.6013
																				Row 3:hEPSC + ACL vs. Row 5:Rset + ACL	-47.78	-77.67 to -17.88	Yes	****	<0.0001
																				Row 3:hEPSC + ACL vs. Row 5:hEPSC +ACLi	5.85	-24.04 to 35.74	No	ns	>0.9999
																				Row 3:hEPSC + ACL vs. Row 5:Rset + ACLi	1.558	-28.33 to 31.45	No	ns	>0.9999
																				Row 3:hEPSC + ACL vs. Row 5:hESC +ACL	-5.629	-35.52 to 24.26	No	ns	>0.9999
																				Row 3:hEPSC + ACL vs. Row 5:hESC + ACLi	8.454	-21.44 to 38.34	No	ns	>0.9999
																				Row 3:hEPSC + ACL vs. Row 6:hEPSC + ACL	-34.4	-64.29 to -4.509	Yes	**	0.0067
																				Row 3:hEPSC + ACL vs. Row 6:Rset + ACL	-61.57	-91.46 to -31.68	Yes	****	<0.0001
																				Row 3:hEPSC + ACL vs. Row 6:hEPSC +ACLi	6.829	-23.06 to 36.72	No	ns	>0.9999
																				Row 3:hEPSC + ACL vs. Row 6:Rset + ACLi	1.183	-28.71 to 31.07	No	ns	>0.9999
																				Row 3:hEPSC + ACL vs. Row 6:hESC +ACL	-23.21	-53.1 to 6.678	No	ns	0.4352
																				Row 3:hEPSC + ACL vs. Row 6:hESC + ACLi	8.454	-21.44 to 38.34	No	ns	>0.9999
																				Row 3:hEPSC + ACL vs. Row 7:hEPSC + ACL	-41.65	-71.54 to -11.76	Yes	***	0.0002
																				Row 3:hEPSC + ACL vs. Row 7:Rset + ACL	-61.53	-91.42 to -31.63	Yes	****	<0.0001
																				Row 3:hEPSC + ACL vs. Row 7:hEPSC +ACLi	8.413	-21.48 to 38.3	No	ns	>0.9999
																				Row 3:hEPSC + ACL vs. Row 7:Rset + ACLi	3.371	-26.52 to 33.26	No	ns	>0.9999
																				Row 3:hEPSC + ACL vs. Row 7:hESC +ACL	-46.55	-76.44 to -16.66	Yes	****	<0.0001
																				Row 3:hEPSC + ACL vs. Row 7:hESC + ACLi	8.454	-21.44 to 38.34	No	ns	>0.9999
																				Row 3:Rset + ACL vs. Row 3:hEPSC +ACLi	8.229	-21.66 to 38.12	No	ns	>0.9999
																				Row 3:Rset + ACL vs. Row 3:Rset + ACLi	5.563	-24.33 to 35.45	No	ns	>0.9999
																				Row 3:Rset + ACL vs. Row 3:hESC +ACL	6.979	-22.91 to 36.87	No	ns	>0.9999
																				Row 3:Rset + ACL vs. Row 3:hESC + ACLi	9.396	-20.49 to 39.29	No	ns	>0.9999
																				Row 3:Rset + ACL vs. Row 4:hEPSC + ACL	-7.667	-37.56 to 22.22	No	ns	>0.9999
																				Row 3:Rset + ACL vs. Row 4:Rset + ACL	-14.77	-44.66 to 15.12	No	ns	0.9934
																				Row 3:Rset + ACL vs. Row 4:hEPSC +ACLi	7.708	-22.18 to 37.6	No	ns	>0.9999
																				Row 3:Rset + ACL vs. Row 4:Rset + ACLi	2.167	-27.72 to 32.06	No	ns	>0.9999
																				Row 3:Rset + ACL vs. Row 4:hESC +ACL	3.292	-26.6 to 33.18	No	ns	>0.9999
																				Row 3:Rset + ACL vs. Row 4:hESC + ACLi	9.354	-20.54 to 39.24	No	ns	>0.9999
																				Row 3:Rset + ACL vs. Row 5:hEPSC + ACL	-20.38	-50.27 to 9.516	No	ns	0.7262
																				Row 3:Rset + ACL vs. Row 5:Rset + ACL	-46.54	-76.43 to -16.65	Yes	****	<0.0001
																				Row 3:Rset + ACL vs. Row 5:hEPSC +ACLi	7.083	-22.81 to 36.97	No	ns	>0.9999
																				Row 3:Rset + ACL vs. Row 5:Rset + ACLi	2.792	-27.1 to 32.68	No	ns	>0.9999
																				Row 3:Rset + ACL vs. Row 5:hESC +ACL	-4.396	-34.29 to 25.49	No	ns	>0.9999
																				Row 3:Rset + ACL vs. Row 5:hESC + ACLi	9.688	-20.2 to 39.58	No	ns	>0.9999
																				Row 3:Rset + ACL vs. Row 6:hEPSC + ACL	-33.17	-63.06 to -3.276	Yes	*	0.012
																				Row 3:Rset + ACL vs. Row 6:Rset + ACL	-60.33	-90.22 to -30.44	Yes	****	<0.0001
																				Row 3:Rset + ACL vs. Row 6:hEPSC +ACLi	8.063	-21.83 to 37.95	No	ns	>0.9999
																				Row 3:Rset + ACL vs. Row 6:Rset + ACLi	2.417	-27.47 to 32.31	No	ns	>0.9999
																				Row 3:Rset + ACL vs. Row 6:hESC +ACL	-21.98	-51.87 to 7.912	No	ns	0.5624
																				Row 3:Rset + ACL vs. Row 6:hESC + ACLi	9.688	-20.2 to 39.58	No	ns	>0.9999
																				Row 3:Rset + ACL vs. Row 7:hEPSC + ACL	-40.42	-70.31 to -10.53	Yes	***	0.0003
																				Row 3:Rset + ACL vs. Row 7:Rset + ACL	-60.29	-90.18 to -30.4	Yes	****	<0.0001
																				Row 3:Rset + ACL vs. Row 7:hEPSC +ACLi	9.646	-20.24 to 39.54	No	ns	>0.9999
																				Row 3:Rset + ACL vs. Row 7:Rset + ACLi	4.604	-25.29 to 34.49	No	ns	>0.9999
																				Row 3:Rset + ACL vs. Row 7:hESC +ACL	-45.31	-75.2 to -15.42	Yes	****	<0.0001
																				Row 3:Rset + ACL vs. Row 7:hESC + ACLi	9.688	-20.2 to 39.58	No	ns	>0.9999
																				Row 3:hEPSC +ACLi vs. Row 3:Rset + ACLi	-2.667	-32.56 to 27.22	No	ns	>0.9999
																				Row 3:hEPSC +ACLi vs. Row 3:hESC +ACL	-1.25	-31.14 to 28.64	No	ns	>0.9999
																				Row 3:hEPSC +ACLi vs. Row 3:hESC + ACLi	1.167	-28.72 to 31.06	No	ns	>0.9999
																				Row 3:hEPSC +ACLi vs. Row 4:hEPSC + ACL	-15.9	-45.79 to 13.99	No	ns	0.9799
																				Row 3:hEPSC +ACLi vs. Row 4:Rset + ACL	-23	-52.89 to 6.891	No	ns	0.4565
																				Row 3:hEPSC +ACLi vs. Row 4:hEPSC +ACLi	-0.5208	-30.41 to 29.37	No	ns	>0.9999
																				Row 3:hEPSC +ACLi vs. Row 4:Rset + ACLi	-6.063	-35.95 to 23.83	No	ns	>0.9999
																				Row 3:hEPSC +ACLi vs. Row 4:hESC +ACL	-4.938	-34.83 to 24.95	No	ns	>0.9999
																				Row 3:hEPSC +ACLi vs. Row 4:hESC + ACLi	1.125	-28.77 to 31.02	No	ns	>0.9999
																				Row 3:hEPSC +ACLi vs. Row 5:hEPSC + ACL	-28.6	-58.49 to 1.287	No	ns	0.0827
																				Row 3:hEPSC +ACLi vs. Row 5:Rset + ACL	-54.77	-84.66 to -24.88	Yes	****	<0.0001
																				Row 3:hEPSC +ACLi vs. Row 5:hEPSC +ACLi	-1.146	-31.04 to 28.74	No	ns	>0.9999
																				Row 3:hEPSC +ACLi vs. Row 5:Rset + ACLi	-5.438	-35.33 to 24.45	No	ns	>0.9999
																				Row 3:hEPSC +ACLi vs. Row 5:hESC +ACL	-12.63	-42.52 to 17.27	No	ns	0.9996
																				Row 3:hEPSC +ACLi vs. Row 5:hESC + ACLi	1.458	-28.43 to 31.35	No	ns	>0.9999
																				Row 3:hEPSC +ACLi vs. Row 6:hEPSC + ACL	-41.4	-71.29 to -11.51	Yes	***	0.0002
																				Row 3:hEPSC +ACLi vs. Row 6:Rset + ACL	-68.56	-98.45 to -38.67	Yes	****	<0.0001
																				Row 3:hEPSC +ACLi vs. Row 6:hEPSC +ACLi	-0.1667	-30.06 to 29.72	No	ns	>0.9999
																				Row 3:hEPSC +ACLi vs. Row 6:Rset + ACLi	-5.813	-35.7 to 24.08	No	ns	>0.9999
																				Row 3:hEPSC +ACLi vs. Row 6:hESC +ACL	-30.21	-60.1 to -0.3175	Yes	*	0.0439
																				Row 3:hEPSC +ACLi vs. Row 6:hESC + ACLi	1.458	-28.43 to 31.35	No	ns	>0.9999
																				Row 3:hEPSC +ACLi vs. Row 7:hEPSC + ACL	-48.65	-78.54 to -18.76	Yes	****	<0.0001
																				Row 3:hEPSC +ACLi vs. Row 7:Rset + ACL	-68.52	-98.41 to -38.63	Yes	****	<0.0001
																				Row 3:hEPSC +ACLi vs. Row 7:hEPSC +ACLi	1.417	-28.47 to 31.31	No	ns	>0.9999
																				Row 3:hEPSC +ACLi vs. Row 7:Rset + ACLi	-3.625	-33.52 to 26.27	No	ns	>0.9999
																				Row 3:hEPSC +ACLi vs. Row 7:hESC +ACL	-53.54	-83.43 to -23.65	Yes	****	<0.0001
																				Row 3:hEPSC +ACLi vs. Row 7:hESC + ACLi	1.458	-28.43 to 31.35	No	ns	>0.9999
																				Row 3:Rset + ACLi vs. Row 3:hESC +ACL	1.417	-28.47 to 31.31	No	ns	>0.9999
																				Row 3:Rset + ACLi vs. Row 3:hESC + ACLi	3.833	-26.06 to 33.72	No	ns	>0.9999
																				Row 3:Rset + ACLi vs. Row 4:hEPSC + ACL	-13.23	-43.12 to 16.66	No	ns	0.9991
																				Row 3:Rset + ACLi vs. Row 4:Rset + ACL	-20.33	-50.22 to 9.557	No	ns	0.7302
																				Row 3:Rset + ACLi vs. Row 4:hEPSC +ACLi	2.146	-27.74 to 32.04	No	ns	>0.9999
																				Row 3:Rset + ACLi vs. Row 4:Rset + ACLi	-3.396	-33.29 to 26.49	No	ns	>0.9999
																				Row 3:Rset + ACLi vs. Row 4:hESC +ACL	-2.271	-32.16 to 27.62	No	ns	>0.9999
																				Row 3:Rset + ACLi vs. Row 4:hESC + ACLi	3.792	-26.1 to 33.68	No	ns	>0.9999
																				Row 3:Rset + ACLi vs. Row 5:hEPSC + ACL	-25.94	-55.83 to 3.953	No	ns	0.2079
																				Row 3:Rset + ACLi vs. Row 5:Rset + ACL	-52.1	-81.99 to -22.21	Yes	****	<0.0001
																				Row 3:Rset + ACLi vs. Row 5:hEPSC +ACLi	1.521	-28.37 to 31.41	No	ns	>0.9999
																				Row 3:Rset + ACLi vs. Row 5:Rset + ACLi	-2.771	-32.66 to 27.12	No	ns	>0.9999
																				Row 3:Rset + ACLi vs. Row 5:hESC +ACL	-9.958	-39.85 to 19.93	No	ns	>0.9999
																				Row 3:Rset + ACLi vs. Row 5:hESC + ACLi	4.125	-25.77 to 34.02	No	ns	>0.9999
																				Row 3:Rset + ACLi vs. Row 6:hEPSC + ACL	-38.73	-68.62 to -8.838	Yes	***	0.0008
																				Row 3:Rset + ACLi vs. Row 6:Rset + ACL	-65.9	-95.79 to -36.01	Yes	****	<0.0001
																				Row 3:Rset + ACLi vs. Row 6:hEPSC +ACLi	2.5	-27.39 to 32.39	No	ns	>0.9999
																				Row 3:Rset + ACLi vs. Row 6:Rset + ACLi	-3.146	-33.04 to 26.74	No	ns	>0.9999
																				Row 3:Rset + ACLi vs. Row 6:hESC +ACL	-27.54	-57.43 to 2.349	No	ns	0.122
																				Row 3:Rset + ACLi vs. Row 6:hESC + ACLi	4.125	-25.77 to 34.02	No	ns	>0.9999
																				Row 3:Rset + ACLi vs. Row 7:hEPSC + ACL	-45.98	-75.87 to -16.09	Yes	****	<0.0001
																				Row 3:Rset + ACLi vs. Row 7:Rset + ACL	-65.85	-95.74 to -35.96	Yes	****	<0.0001
																				Row 3:Rset + ACLi vs. Row 7:hEPSC +ACLi	4.083	-25.81 to 33.97	No	ns	>0.9999
																				Row 3:Rset + ACLi vs. Row 7:Rset + ACLi	-0.9583	-30.85 to 28.93	No	ns	>0.9999
																				Row 3:Rset + ACLi vs. Row 7:hESC +ACL	-50.88	-80.77 to -20.98	Yes	****	<0.0001
																				Row 3:Rset + ACLi vs. Row 7:hESC + ACLi	4.125	-25.77 to 34.02	No	ns	>0.9999
																				Row 3:hESC +ACL vs. Row 3:hESC + ACLi	2.417	-27.47 to 32.31	No	ns	>0.9999
																				Row 3:hESC +ACL vs. Row 4:hEPSC + ACL	-14.65	-44.54 to 15.24	No	ns	0.9942
																				Row 3:hESC +ACL vs. Row 4:Rset + ACL	-21.75	-51.64 to 8.141	No	ns	0.5864
																				Row 3:hESC +ACL vs. Row 4:hEPSC +ACLi	0.7292	-29.16 to 30.62	No	ns	>0.9999
																				Row 3:hESC +ACL vs. Row 4:Rset + ACLi	-4.813	-34.7 to 25.08	No	ns	>0.9999
																				Row 3:hESC +ACL vs. Row 4:hESC +ACL	-3.688	-33.58 to 26.2	No	ns	>0.9999
																				Row 3:hESC +ACL vs. Row 4:hESC + ACLi	2.375	-27.52 to 32.27	No	ns	>0.9999
																				Row 3:hESC +ACL vs. Row 5:hEPSC + ACL	-27.35	-57.24 to 2.537	No	ns	0.1303
																				Row 3:hESC +ACL vs. Row 5:Rset + ACL	-53.52	-83.41 to -23.63	Yes	****	<0.0001
																				Row 3:hESC +ACL vs. Row 5:hEPSC +ACLi	0.1042	-29.79 to 29.99	No	ns	>0.9999
																				Row 3:hESC +ACL vs. Row 5:Rset + ACLi	-4.188	-34.08 to 25.7	No	ns	>0.9999
																				Row 3:hESC +ACL vs. Row 5:hESC +ACL	-11.38	-41.27 to 18.52	No	ns	>0.9999
																				Row 3:hESC +ACL vs. Row 5:hESC + ACLi	2.708	-27.18 to 32.6	No	ns	>0.9999
																				Row 3:hESC +ACL vs. Row 6:hEPSC + ACL	-40.15	-70.04 to -10.26	Yes	***	0.0004
																				Row 3:hESC +ACL vs. Row 6:Rset + ACL	-67.31	-97.2 to -37.42	Yes	****	<0.0001
																				Row 3:hESC +ACL vs. Row 6:hEPSC +ACLi	1.083	-28.81 to 30.97	No	ns	>0.9999
																				Row 3:hESC +ACL vs. Row 6:Rset + ACLi	-4.563	-34.45 to 25.33	No	ns	>0.9999
																				Row 3:hESC +ACL vs. Row 6:hESC +ACL	-28.96	-58.85 to 0.9325	No	ns	0.0723
																				Row 3:hESC +ACL vs. Row 6:hESC + ACLi	2.708	-27.18 to 32.6	No	ns	>0.9999
																				Row 3:hESC +ACL vs. Row 7:hEPSC + ACL	-47.4	-77.29 to -17.51	Yes	****	<0.0001
																				Row 3:hESC +ACL vs. Row 7:Rset + ACL	-67.27	-97.16 to -37.38	Yes	****	<0.0001
																				Row 3:hESC +ACL vs. Row 7:hEPSC +ACLi	2.667	-27.22 to 32.56	No	ns	>0.9999
																				Row 3:hESC +ACL vs. Row 7:Rset + ACLi	-2.375	-32.27 to 27.52	No	ns	>0.9999
																				Row 3:hESC +ACL vs. Row 7:hESC +ACL	-52.29	-82.18 to -22.4	Yes	****	<0.0001
																				Row 3:hESC +ACL vs. Row 7:hESC + ACLi	2.708	-27.18 to 32.6	No	ns	>0.9999
																				Row 3:hESC + ACLi vs. Row 4:hEPSC + ACL	-17.06	-46.95 to 12.83	No	ns	0.9495
																				Row 3:hESC + ACLi vs. Row 4:Rset + ACL	-24.17	-54.06 to 5.724	No	ns	0.3448
																				Row 3:hESC + ACLi vs. Row 4:hEPSC +ACLi	-1.688	-31.58 to 28.2	No	ns	>0.9999
																				Row 3:hESC + ACLi vs. Row 4:Rset + ACLi	-7.229	-37.12 to 22.66	No	ns	>0.9999
																				Row 3:hESC + ACLi vs. Row 4:hESC +ACL	-6.104	-35.99 to 23.79	No	ns	>0.9999
																				Row 3:hESC + ACLi vs. Row 4:hESC + ACLi	-0.04167	-29.93 to 29.85	No	ns	>0.9999
																				Row 3:hESC + ACLi vs. Row 5:hEPSC + ACL	-29.77	-59.66 to 0.12	No	ns	0.0525
																				Row 3:hESC + ACLi vs. Row 5:Rset + ACL	-55.94	-85.83 to -26.05	Yes	****	<0.0001
																				Row 3:hESC + ACLi vs. Row 5:hEPSC +ACLi	-2.313	-32.2 to 27.58	No	ns	>0.9999
																				Row 3:hESC + ACLi vs. Row 5:Rset + ACLi	-6.604	-36.49 to 23.29	No	ns	>0.9999
																				Row 3:hESC + ACLi vs. Row 5:hESC +ACL	-13.79	-43.68 to 16.1	No	ns	0.998
																				Row 3:hESC + ACLi vs. Row 5:hESC + ACLi	0.2917	-29.6 to 30.18	No	ns	>0.9999
																				Row 3:hESC + ACLi vs. Row 6:hEPSC + ACL	-42.56	-72.45 to -12.67	Yes	****	<0.0001
																				Row 3:hESC + ACLi vs. Row 6:Rset + ACL	-69.73	-99.62 to -39.84	Yes	****	<0.0001
																				Row 3:hESC + ACLi vs. Row 6:hEPSC +ACLi	-1.333	-31.22 to 28.56	No	ns	>0.9999
																				Row 3:hESC + ACLi vs. Row 6:Rset + ACLi	-6.979	-36.87 to 22.91	No	ns	>0.9999
																				Row 3:hESC + ACLi vs. Row 6:hESC +ACL	-31.38	-61.27 to -1.484	Yes	*	0.0269
																				Row 3:hESC + ACLi vs. Row 6:hESC + ACLi	0.2917	-29.6 to 30.18	No	ns	>0.9999
																				Row 3:hESC + ACLi vs. Row 7:hEPSC + ACL	-49.81	-79.7 to -19.92	Yes	****	<0.0001
																				Row 3:hESC + ACLi vs. Row 7:Rset + ACL	-69.69	-99.58 to -39.8	Yes	****	<0.0001
																				Row 3:hESC + ACLi vs. Row 7:hEPSC +ACLi	0.25	-29.64 to 30.14	No	ns	>0.9999
																				Row 3:hESC + ACLi vs. Row 7:Rset + ACLi	-4.792	-34.68 to 25.1	No	ns	>0.9999
																				Row 3:hESC + ACLi vs. Row 7:hESC +ACL	-54.71	-84.6 to -24.82	Yes	****	<0.0001
																				Row 3:hESC + ACLi vs. Row 7:hESC + ACLi	0.2917	-29.6 to 30.18	No	ns	>0.9999
																				Row 4:hEPSC + ACL vs. Row 4:Rset + ACL	-7.104	-36.99 to 22.79	No	ns	>0.9999
																				Row 4:hEPSC + ACL vs. Row 4:hEPSC +ACLi	15.38	-14.52 to 45.27	No	ns	0.9876
																				Row 4:hEPSC + ACL vs. Row 4:Rset + ACLi	9.833	-20.06 to 39.72	No	ns	>0.9999
																				Row 4:hEPSC + ACL vs. Row 4:hESC +ACL	10.96	-18.93 to 40.85	No	ns	>0.9999
																				Row 4:hEPSC + ACL vs. Row 4:hESC + ACLi	17.02	-12.87 to 46.91	No	ns	0.951
																				Row 4:hEPSC + ACL vs. Row 5:hEPSC + ACL	-12.71	-42.6 to 17.18	No	ns	0.9996
																				Row 4:hEPSC + ACL vs. Row 5:Rset + ACL	-38.88	-68.77 to -8.984	Yes	***	0.0007
																				Row 4:hEPSC + ACL vs. Row 5:hEPSC +ACLi	14.75	-15.14 to 44.64	No	ns	0.9935
																				Row 4:hEPSC + ACL vs. Row 5:Rset + ACLi	10.46	-19.43 to 40.35	No	ns	>0.9999
																				Row 4:hEPSC + ACL vs. Row 5:hESC +ACL	3.271	-26.62 to 33.16	No	ns	>0.9999
																				Row 4:hEPSC + ACL vs. Row 5:hESC + ACLi	17.35	-12.54 to 47.24	No	ns	0.9384
																				Row 4:hEPSC + ACL vs. Row 6:hEPSC + ACL	-25.5	-55.39 to 4.391	No	ns	0.2376
																				Row 4:hEPSC + ACL vs. Row 6:Rset + ACL	-52.67	-82.56 to -22.78	Yes	****	<0.0001
																				Row 4:hEPSC + ACL vs. Row 6:hEPSC +ACLi	15.73	-14.16 to 45.62	No	ns	0.9827
																				Row 4:hEPSC + ACL vs. Row 6:Rset + ACLi	10.08	-19.81 to 39.97	No	ns	>0.9999
																				Row 4:hEPSC + ACL vs. Row 6:hESC +ACL	-14.31	-44.2 to 15.58	No	ns	0.9961
																				Row 4:hEPSC + ACL vs. Row 6:hESC + ACLi	17.35	-12.54 to 47.24	No	ns	0.9384
																				Row 4:hEPSC + ACL vs. Row 7:hEPSC + ACL	-32.75	-62.64 to -2.859	Yes	*	0.0146
																				Row 4:hEPSC + ACL vs. Row 7:Rset + ACL	-52.63	-82.52 to -22.73	Yes	****	<0.0001
																				Row 4:hEPSC + ACL vs. Row 7:hEPSC +ACLi	17.31	-12.58 to 47.2	No	ns	0.94
																				Row 4:hEPSC + ACL vs. Row 7:Rset + ACLi	12.27	-17.62 to 42.16	No	ns	0.9998
																				Row 4:hEPSC + ACL vs. Row 7:hESC +ACL	-37.65	-67.54 to -7.755	Yes	**	0.0013
																				Row 4:hEPSC + ACL vs. Row 7:hESC + ACLi	17.35	-12.54 to 47.24	No	ns	0.9384
																				Row 4:Rset + ACL vs. Row 4:hEPSC +ACLi	22.48	-7.412 to 52.37	No	ns	0.51
																				Row 4:Rset + ACL vs. Row 4:Rset + ACLi	16.94	-12.95 to 46.83	No	ns	0.9538
																				Row 4:Rset + ACL vs. Row 4:hESC +ACL	18.06	-11.83 to 47.95	No	ns	0.9044
																				Row 4:Rset + ACL vs. Row 4:hESC + ACLi	24.13	-5.766 to 54.02	No	ns	0.3486
																				Row 4:Rset + ACL vs. Row 5:hEPSC + ACL	-5.604	-35.49 to 24.29	No	ns	>0.9999
																				Row 4:Rset + ACL vs. Row 5:Rset + ACL	-31.77	-61.66 to -1.88	Yes	*	0.0226
																				Row 4:Rset + ACL vs. Row 5:hEPSC +ACLi	21.85	-8.037 to 51.74	No	ns	0.5755
																				Row 4:Rset + ACL vs. Row 5:Rset + ACLi	17.56	-12.33 to 47.45	No	ns	0.9294
																				Row 4:Rset + ACL vs. Row 5:hESC +ACL	10.38	-19.52 to 40.27	No	ns	>0.9999
																				Row 4:Rset + ACL vs. Row 5:hESC + ACLi	24.46	-5.432 to 54.35	No	ns	0.3193
																				Row 4:Rset + ACL vs. Row 6:hEPSC + ACL	-18.4	-48.29 to 11.49	No	ns	0.885
																				Row 4:Rset + ACL vs. Row 6:Rset + ACL	-45.56	-75.45 to -15.67	Yes	****	<0.0001
																				Row 4:Rset + ACL vs. Row 6:hEPSC +ACLi	22.83	-7.057 to 52.72	No	ns	0.4734
																				Row 4:Rset + ACL vs. Row 6:Rset + ACLi	17.19	-12.7 to 47.08	No	ns	0.9449
																				Row 4:Rset + ACL vs. Row 6:hESC +ACL	-7.208	-37.1 to 22.68	No	ns	>0.9999
																				Row 4:Rset + ACL vs. Row 6:hESC + ACLi	24.46	-5.432 to 54.35	No	ns	0.3193
																				Row 4:Rset + ACL vs. Row 7:hEPSC + ACL	-25.65	-55.54 to 4.245	No	ns	0.2274
																				Row 4:Rset + ACL vs. Row 7:Rset + ACL	-45.52	-75.41 to -15.63	Yes	****	<0.0001
																				Row 4:Rset + ACL vs. Row 7:hEPSC +ACLi	24.42	-5.474 to 54.31	No	ns	0.3229
																				Row 4:Rset + ACL vs. Row 7:Rset + ACLi	19.38	-10.52 to 49.27	No	ns	0.815
																				Row 4:Rset + ACL vs. Row 7:hESC +ACL	-30.54	-60.43 to -0.6509	Yes	*	0.0383
																				Row 4:Rset + ACL vs. Row 7:hESC + ACLi	24.46	-5.432 to 54.35	No	ns	0.3193
																				Row 4:hEPSC +ACLi vs. Row 4:Rset + ACLi	-5.542	-35.43 to 24.35	No	ns	>0.9999
																				Row 4:hEPSC +ACLi vs. Row 4:hESC +ACL	-4.417	-34.31 to 25.47	No	ns	>0.9999
																				Row 4:hEPSC +ACLi vs. Row 4:hESC + ACLi	1.646	-28.24 to 31.54	No	ns	>0.9999
																				Row 4:hEPSC +ACLi vs. Row 5:hEPSC + ACL	-28.08	-57.97 to 1.807	No	ns	0.1004
																				Row 4:hEPSC +ACLi vs. Row 5:Rset + ACL	-54.25	-84.14 to -24.36	Yes	****	<0.0001
																				Row 4:hEPSC +ACLi vs. Row 5:hEPSC +ACLi	-0.625	-30.52 to 29.27	No	ns	>0.9999
																				Row 4:hEPSC +ACLi vs. Row 5:Rset + ACLi	-4.917	-34.81 to 24.97	No	ns	>0.9999
																				Row 4:hEPSC +ACLi vs. Row 5:hESC +ACL	-12.1	-41.99 to 17.79	No	ns	0.9998
																				Row 4:hEPSC +ACLi vs. Row 5:hESC + ACLi	1.979	-27.91 to 31.87	No	ns	>0.9999
																				Row 4:hEPSC +ACLi vs. Row 6:hEPSC + ACL	-40.88	-70.77 to -10.98	Yes	***	0.0002
																				Row 4:hEPSC +ACLi vs. Row 6:Rset + ACL	-68.04	-97.93 to -38.15	Yes	****	<0.0001
																				Row 4:hEPSC +ACLi vs. Row 6:hEPSC +ACLi	0.3542	-29.54 to 30.24	No	ns	>0.9999
																				Row 4:hEPSC +ACLi vs. Row 6:Rset + ACLi	-5.292	-35.18 to 24.6	No	ns	>0.9999
																				Row 4:hEPSC +ACLi vs. Row 6:hESC +ACL	-29.69	-59.58 to 0.2033	No	ns	0.0543
																				Row 4:hEPSC +ACLi vs. Row 6:hESC + ACLi	1.979	-27.91 to 31.87	No	ns	>0.9999
																				Row 4:hEPSC +ACLi vs. Row 7:hEPSC + ACL	-48.13	-78.02 to -18.23	Yes	****	<0.0001
																				Row 4:hEPSC +ACLi vs. Row 7:Rset + ACL	-68	-97.89 to -38.11	Yes	****	<0.0001
																				Row 4:hEPSC +ACLi vs. Row 7:hEPSC +ACLi	1.938	-27.95 to 31.83	No	ns	>0.9999
																				Row 4:hEPSC +ACLi vs. Row 7:Rset + ACLi	-3.104	-32.99 to 26.79	No	ns	>0.9999
																				Row 4:hEPSC +ACLi vs. Row 7:hESC +ACL	-53.02	-82.91 to -23.13	Yes	****	<0.0001
																				Row 4:hEPSC +ACLi vs. Row 7:hESC + ACLi	1.979	-27.91 to 31.87	No	ns	>0.9999
																				Row 4:Rset + ACLi vs. Row 4:hESC +ACL	1.125	-28.77 to 31.02	No	ns	>0.9999
																				Row 4:Rset + ACLi vs. Row 4:hESC + ACLi	7.188	-22.7 to 37.08	No	ns	>0.9999
																				Row 4:Rset + ACLi vs. Row 5:hEPSC + ACL	-22.54	-52.43 to 7.349	No	ns	0.5035
																				Row 4:Rset + ACLi vs. Row 5:Rset + ACL	-48.71	-78.6 to -18.82	Yes	****	<0.0001
																				Row 4:Rset + ACLi vs. Row 5:hEPSC +ACLi	4.917	-24.97 to 34.81	No	ns	>0.9999
																				Row 4:Rset + ACLi vs. Row 5:Rset + ACLi	0.625	-29.27 to 30.52	No	ns	>0.9999
																				Row 4:Rset + ACLi vs. Row 5:hESC +ACL	-6.563	-36.45 to 23.33	No	ns	>0.9999
																				Row 4:Rset + ACLi vs. Row 5:hESC + ACLi	7.521	-22.37 to 37.41	No	ns	>0.9999
																				Row 4:Rset + ACLi vs. Row 6:hEPSC + ACL	-35.33	-65.22 to -5.443	Yes	**	0.0043
																				Row 4:Rset + ACLi vs. Row 6:Rset + ACL	-62.5	-92.39 to -32.61	Yes	****	<0.0001
																				Row 4:Rset + ACLi vs. Row 6:hEPSC +ACLi	5.896	-23.99 to 35.79	No	ns	>0.9999
																				Row 4:Rset + ACLi vs. Row 6:Rset + ACLi	0.25	-29.64 to 30.14	No	ns	>0.9999
																				Row 4:Rset + ACLi vs. Row 6:hESC +ACL	-24.15	-54.04 to 5.745	No	ns	0.3467
																				Row 4:Rset + ACLi vs. Row 6:hESC + ACLi	7.521	-22.37 to 37.41	No	ns	>0.9999
																				Row 4:Rset + ACLi vs. Row 7:hEPSC + ACL	-42.58	-72.47 to -12.69	Yes	****	<0.0001
																				Row 4:Rset + ACLi vs. Row 7:Rset + ACL	-62.46	-92.35 to -32.57	Yes	****	<0.0001
																				Row 4:Rset + ACLi vs. Row 7:hEPSC +ACLi	7.479	-22.41 to 37.37	No	ns	>0.9999
																				Row 4:Rset + ACLi vs. Row 7:Rset + ACLi	2.438	-27.45 to 32.33	No	ns	>0.9999
																				Row 4:Rset + ACLi vs. Row 7:hESC +ACL	-47.48	-77.37 to -17.59	Yes	****	<0.0001
																				Row 4:Rset + ACLi vs. Row 7:hESC + ACLi	7.521	-22.37 to 37.41	No	ns	>0.9999
																				Row 4:hESC +ACL vs. Row 4:hESC + ACLi	6.063	-23.83 to 35.95	No	ns	>0.9999
																				Row 4:hESC +ACL vs. Row 5:hEPSC + ACL	-23.67	-53.56 to 6.224	No	ns	0.391
																				Row 4:hESC +ACL vs. Row 5:Rset + ACL	-49.83	-79.72 to -19.94	Yes	****	<0.0001
																				Row 4:hESC +ACL vs. Row 5:hEPSC +ACLi	3.792	-26.1 to 33.68	No	ns	>0.9999
																				Row 4:hESC +ACL vs. Row 5:Rset + ACLi	-0.5	-30.39 to 29.39	No	ns	>0.9999
																				Row 4:hESC +ACL vs. Row 5:hESC +ACL	-7.688	-37.58 to 22.2	No	ns	>0.9999
																				Row 4:hESC +ACL vs. Row 5:hESC + ACLi	6.396	-23.49 to 36.29	No	ns	>0.9999
																				Row 4:hESC +ACL vs. Row 6:hEPSC + ACL	-36.46	-66.35 to -6.568	Yes	**	0.0024
																				Row 4:hESC +ACL vs. Row 6:Rset + ACL	-63.63	-93.52 to -33.73	Yes	****	<0.0001
																				Row 4:hESC +ACL vs. Row 6:hEPSC +ACLi	4.771	-25.12 to 34.66	No	ns	>0.9999
																				Row 4:hESC +ACL vs. Row 6:Rset + ACLi	-0.875	-30.77 to 29.02	No	ns	>0.9999
																				Row 4:hESC +ACL vs. Row 6:hESC +ACL	-25.27	-55.16 to 4.62	No	ns	0.2543
																				Row 4:hESC +ACL vs. Row 6:hESC + ACLi	6.396	-23.49 to 36.29	No	ns	>0.9999
																				Row 4:hESC +ACL vs. Row 7:hEPSC + ACL	-43.71	-73.6 to -13.82	Yes	****	<0.0001
																				Row 4:hESC +ACL vs. Row 7:Rset + ACL	-63.58	-93.47 to -33.69	Yes	****	<0.0001
																				Row 4:hESC +ACL vs. Row 7:hEPSC +ACLi	6.354	-23.54 to 36.24	No	ns	>0.9999
																				Row 4:hESC +ACL vs. Row 7:Rset + ACLi	1.313	-28.58 to 31.2	No	ns	>0.9999
																				Row 4:hESC +ACL vs. Row 7:hESC +ACL	-48.6	-78.49 to -18.71	Yes	****	<0.0001
																				Row 4:hESC +ACL vs. Row 7:hESC + ACLi	6.396	-23.49 to 36.29	No	ns	>0.9999
																				Row 4:hESC + ACLi vs. Row 5:hEPSC + ACL	-29.73	-59.62 to 0.1616	No	ns	0.0534
																				Row 4:hESC + ACLi vs. Row 5:Rset + ACL	-55.9	-85.79 to -26.01	Yes	****	<0.0001
																				Row 4:hESC + ACLi vs. Row 5:hEPSC +ACLi	-2.271	-32.16 to 27.62	No	ns	>0.9999
																				Row 4:hESC + ACLi vs. Row 5:Rset + ACLi	-6.563	-36.45 to 23.33	No	ns	>0.9999
																				Row 4:hESC + ACLi vs. Row 5:hESC +ACL	-13.75	-43.64 to 16.14	No	ns	0.9981
																				Row 4:hESC + ACLi vs. Row 5:hESC + ACLi	0.3333	-29.56 to 30.22	No	ns	>0.9999
																				Row 4:hESC + ACLi vs. Row 6:hEPSC + ACL	-42.52	-72.41 to -12.63	Yes	****	<0.0001
																				Row 4:hESC + ACLi vs. Row 6:Rset + ACL	-69.69	-99.58 to -39.8	Yes	****	<0.0001
																				Row 4:hESC + ACLi vs. Row 6:hEPSC +ACLi	-1.292	-31.18 to 28.6	No	ns	>0.9999
																				Row 4:hESC + ACLi vs. Row 6:Rset + ACLi	-6.938	-36.83 to 22.95	No	ns	>0.9999
																				Row 4:hESC + ACLi vs. Row 6:hESC +ACL	-31.33	-61.22 to -1.443	Yes	*	0.0273
																				Row 4:hESC + ACLi vs. Row 6:hESC + ACLi	0.3333	-29.56 to 30.22	No	ns	>0.9999
																				Row 4:hESC + ACLi vs. Row 7:hEPSC + ACL	-49.77	-79.66 to -19.88	Yes	****	<0.0001
																				Row 4:hESC + ACLi vs. Row 7:Rset + ACL	-69.65	-99.54 to -39.76	Yes	****	<0.0001
																				Row 4:hESC + ACLi vs. Row 7:hEPSC +ACLi	0.2917	-29.6 to 30.18	No	ns	>0.9999
																				Row 4:hESC + ACLi vs. Row 7:Rset + ACLi	-4.75	-34.64 to 25.14	No	ns	>0.9999
																				Row 4:hESC + ACLi vs. Row 7:hESC +ACL	-54.67	-84.56 to -24.78	Yes	****	<0.0001
																				Row 4:hESC + ACLi vs. Row 7:hESC + ACLi	0.3333	-29.56 to 30.22	No	ns	>0.9999
																				Row 5:hEPSC + ACL vs. Row 5:Rset + ACL	-26.17	-56.06 to 3.724	No	ns	0.1935
																				Row 5:hEPSC + ACL vs. Row 5:hEPSC +ACLi	27.46	-2.432 to 57.35	No	ns	0.1256
																				Row 5:hEPSC + ACL vs. Row 5:Rset + ACLi	23.17	-6.724 to 53.06	No	ns	0.4397
																				Row 5:hEPSC + ACL vs. Row 5:hESC +ACL	15.98	-13.91 to 45.87	No	ns	0.9784
																				Row 5:hEPSC + ACL vs. Row 5:hESC + ACLi	30.06	0.1717 to 59.95	Yes	*	0.0466
																				Row 5:hEPSC + ACL vs. Row 6:hEPSC + ACL	-12.79	-42.68 to 17.1	No	ns	0.9995
																				Row 5:hEPSC + ACL vs. Row 6:Rset + ACL	-39.96	-69.85 to -10.07	Yes	***	0.0004
																				Row 5:hEPSC + ACL vs. Row 6:hEPSC +ACLi	28.44	-1.453 to 58.33	No	ns	0.0881
																				Row 5:hEPSC + ACL vs. Row 6:Rset + ACLi	22.79	-7.099 to 52.68	No	ns	0.4777
																				Row 5:hEPSC + ACL vs. Row 6:hESC +ACL	-1.604	-31.49 to 28.29	No	ns	>0.9999
																				Row 5:hEPSC + ACL vs. Row 6:hESC + ACLi	30.06	0.1717 to 59.95	Yes	*	0.0466
																				Row 5:hEPSC + ACL vs. Row 7:hEPSC + ACL	-20.04	-49.93 to 9.849	No	ns	0.7575
																				Row 5:hEPSC + ACL vs. Row 7:Rset + ACL	-39.92	-69.81 to -10.03	Yes	***	0.0004
																				Row 5:hEPSC + ACL vs. Row 7:hEPSC +ACLi	30.02	0.13 to 59.91	Yes	*	0.0474
																				Row 5:hEPSC + ACL vs. Row 7:Rset + ACLi	24.98	-4.912 to 54.87	No	ns	0.2766
																				Row 5:hEPSC + ACL vs. Row 7:hESC +ACL	-24.94	-54.83 to 4.953	No	ns	0.2798
																				Row 5:hEPSC + ACL vs. Row 7:hESC + ACLi	30.06	0.1717 to 59.95	Yes	*	0.0466
																				Row 5:Rset + ACL vs. Row 5:hEPSC +ACLi	53.63	23.73 to 83.52	Yes	****	<0.0001
																				Row 5:Rset + ACL vs. Row 5:Rset + ACLi	49.33	19.44 to 79.22	Yes	****	<0.0001
																				Row 5:Rset + ACL vs. Row 5:hESC +ACL	42.15	12.26 to 72.04	Yes	***	0.0001
																				Row 5:Rset + ACL vs. Row 5:hESC + ACLi	56.23	26.34 to 86.12	Yes	****	<0.0001
																				Row 5:Rset + ACL vs. Row 6:hEPSC + ACL	13.38	-16.52 to 43.27	No	ns	0.9988
																				Row 5:Rset + ACL vs. Row 6:Rset + ACL	-13.79	-43.68 to 16.1	No	ns	0.998
																				Row 5:Rset + ACL vs. Row 6:hEPSC +ACLi	54.6	24.71 to 84.49	Yes	****	<0.0001
																				Row 5:Rset + ACL vs. Row 6:Rset + ACLi	48.96	19.07 to 78.85	Yes	****	<0.0001
																				Row 5:Rset + ACL vs. Row 6:hESC +ACL	24.56	-5.328 to 54.45	No	ns	0.3105
																				Row 5:Rset + ACL vs. Row 6:hESC + ACLi	56.23	26.34 to 86.12	Yes	****	<0.0001
																				Row 5:Rset + ACL vs. Row 7:hEPSC + ACL	6.125	-23.77 to 36.02	No	ns	>0.9999
																				Row 5:Rset + ACL vs. Row 7:Rset + ACL	-13.75	-43.64 to 16.14	No	ns	0.9981
																				Row 5:Rset + ACL vs. Row 7:hEPSC +ACLi	56.19	26.3 to 86.08	Yes	****	<0.0001
																				Row 5:Rset + ACL vs. Row 7:Rset + ACLi	51.15	21.26 to 81.04	Yes	****	<0.0001
																				Row 5:Rset + ACL vs. Row 7:hESC +ACL	1.229	-28.66 to 31.12	No	ns	>0.9999
																				Row 5:Rset + ACL vs. Row 7:hESC + ACLi	56.23	26.34 to 86.12	Yes	****	<0.0001
																				Row 5:hEPSC +ACLi vs. Row 5:Rset + ACLi	-4.292	-34.18 to 25.6	No	ns	>0.9999
																				Row 5:hEPSC +ACLi vs. Row 5:hESC +ACL	-11.48	-41.37 to 18.41	No	ns	>0.9999
																				Row 5:hEPSC +ACLi vs. Row 5:hESC + ACLi	2.604	-27.29 to 32.49	No	ns	>0.9999
																				Row 5:hEPSC +ACLi vs. Row 6:hEPSC + ACL	-40.25	-70.14 to -10.36	Yes	***	0.0003
																				Row 5:hEPSC +ACLi vs. Row 6:Rset + ACL	-67.42	-97.31 to -37.53	Yes	****	<0.0001
																				Row 5:hEPSC +ACLi vs. Row 6:hEPSC +ACLi	0.9792	-28.91 to 30.87	No	ns	>0.9999
																				Row 5:hEPSC +ACLi vs. Row 6:Rset + ACLi	-4.667	-34.56 to 25.22	No	ns	>0.9999
																				Row 5:hEPSC +ACLi vs. Row 6:hESC +ACL	-29.06	-58.95 to 0.8283	No	ns	0.0694
																				Row 5:hEPSC +ACLi vs. Row 6:hESC + ACLi	2.604	-27.29 to 32.49	No	ns	>0.9999
																				Row 5:hEPSC +ACLi vs. Row 7:hEPSC + ACL	-47.5	-77.39 to -17.61	Yes	****	<0.0001
																				Row 5:hEPSC +ACLi vs. Row 7:Rset + ACL	-67.38	-97.27 to -37.48	Yes	****	<0.0001
																				Row 5:hEPSC +ACLi vs. Row 7:hEPSC +ACLi	2.563	-27.33 to 32.45	No	ns	>0.9999
																				Row 5:hEPSC +ACLi vs. Row 7:Rset + ACLi	-2.479	-32.37 to 27.41	No	ns	>0.9999
																				Row 5:hEPSC +ACLi vs. Row 7:hESC +ACL	-52.4	-82.29 to -22.51	Yes	****	<0.0001
																				Row 5:hEPSC +ACLi vs. Row 7:hESC + ACLi	2.604	-27.29 to 32.49	No	ns	>0.9999
																				Row 5:Rset + ACLi vs. Row 5:hESC +ACL	-7.188	-37.08 to 22.7	No	ns	>0.9999
																				Row 5:Rset + ACLi vs. Row 5:hESC + ACLi	6.896	-22.99 to 36.79	No	ns	>0.9999
																				Row 5:Rset + ACLi vs. Row 6:hEPSC + ACL	-35.96	-65.85 to -6.068	Yes	**	0.0031
																				Row 5:Rset + ACLi vs. Row 6:Rset + ACL	-63.13	-93.02 to -33.23	Yes	****	<0.0001
																				Row 5:Rset + ACLi vs. Row 6:hEPSC +ACLi	5.271	-24.62 to 35.16	No	ns	>0.9999
																				Row 5:Rset + ACLi vs. Row 6:Rset + ACLi	-0.375	-30.27 to 29.52	No	ns	>0.9999
																				Row 5:Rset + ACLi vs. Row 6:hESC +ACL	-24.77	-54.66 to 5.12	No	ns	0.2932
																				Row 5:Rset + ACLi vs. Row 6:hESC + ACLi	6.896	-22.99 to 36.79	No	ns	>0.9999
																				Row 5:Rset + ACLi vs. Row 7:hEPSC + ACL	-43.21	-73.1 to -13.32	Yes	****	<0.0001
																				Row 5:Rset + ACLi vs. Row 7:Rset + ACL	-63.08	-92.97 to -33.19	Yes	****	<0.0001
																				Row 5:Rset + ACLi vs. Row 7:hEPSC +ACLi	6.854	-23.04 to 36.74	No	ns	>0.9999
																				Row 5:Rset + ACLi vs. Row 7:Rset + ACLi	1.813	-28.08 to 31.7	No	ns	>0.9999
																				Row 5:Rset + ACLi vs. Row 7:hESC +ACL	-48.1	-77.99 to -18.21	Yes	****	<0.0001
																				Row 5:Rset + ACLi vs. Row 7:hESC + ACLi	6.896	-22.99 to 36.79	No	ns	>0.9999
																				Row 5:hESC +ACL vs. Row 5:hESC + ACLi	14.08	-15.81 to 43.97	No	ns	0.997
																				Row 5:hESC +ACL vs. Row 6:hEPSC + ACL	-28.77	-58.66 to 1.12	No	ns	0.0777
																				Row 5:hESC +ACL vs. Row 6:Rset + ACL	-55.94	-85.83 to -26.05	Yes	****	<0.0001
																				Row 5:hESC +ACL vs. Row 6:hEPSC +ACLi	12.46	-17.43 to 42.35	No	ns	0.9997
																				Row 5:hESC +ACL vs. Row 6:Rset + ACLi	6.813	-23.08 to 36.7	No	ns	>0.9999
																				Row 5:hESC +ACL vs. Row 6:hESC +ACL	-17.58	-47.47 to 12.31	No	ns	0.9285
																				Row 5:hESC +ACL vs. Row 6:hESC + ACLi	14.08	-15.81 to 43.97	No	ns	0.997
																				Row 5:hESC +ACL vs. Row 7:hEPSC + ACL	-36.02	-65.91 to -6.13	Yes	**	0.003
																				Row 5:hESC +ACL vs. Row 7:Rset + ACL	-55.9	-85.79 to -26.01	Yes	****	<0.0001
																				Row 5:hESC +ACL vs. Row 7:hEPSC +ACLi	14.04	-15.85 to 43.93	No	ns	0.9972
																				Row 5:hESC +ACL vs. Row 7:Rset + ACLi	9	-20.89 to 38.89	No	ns	>0.9999
																				Row 5:hESC +ACL vs. Row 7:hESC +ACL	-40.92	-70.81 to -11.03	Yes	***	0.0002
																				Row 5:hESC +ACL vs. Row 7:hESC + ACLi	14.08	-15.81 to 43.97	No	ns	0.997
																				Row 5:hESC + ACLi vs. Row 6:hEPSC + ACL	-42.85	-72.74 to -12.96	Yes	****	<0.0001
																				Row 5:hESC + ACLi vs. Row 6:Rset + ACL	-70.02	-99.91 to -40.13	Yes	****	<0.0001
																				Row 5:hESC + ACLi vs. Row 6:hEPSC +ACLi	-1.625	-31.52 to 28.27	No	ns	>0.9999
																				Row 5:hESC + ACLi vs. Row 6:Rset + ACLi	-7.271	-37.16 to 22.62	No	ns	>0.9999
																				Row 5:hESC + ACLi vs. Row 6:hESC +ACL	-31.67	-61.56 to -1.776	Yes	*	0.0237
																				Row 5:hESC + ACLi vs. Row 6:hESC + ACLi	0	-29.89 to 29.89	No	ns	>0.9999
																				Row 5:hESC + ACLi vs. Row 7:hEPSC + ACL	-50.1	-79.99 to -20.21	Yes	****	<0.0001
																				Row 5:hESC + ACLi vs. Row 7:Rset + ACL	-69.98	-99.87 to -40.09	Yes	****	<0.0001
																				Row 5:hESC + ACLi vs. Row 7:hEPSC +ACLi	-0.04167	-29.93 to 29.85	No	ns	>0.9999
																				Row 5:hESC + ACLi vs. Row 7:Rset + ACLi	-5.083	-34.97 to 24.81	No	ns	>0.9999
																				Row 5:hESC + ACLi vs. Row 7:hESC +ACL	-55	-84.89 to -25.11	Yes	****	<0.0001
																				Row 5:hESC + ACLi vs. Row 7:hESC + ACLi	0	-29.89 to 29.89	No	ns	>0.9999
																				Row 6:hEPSC + ACL vs. Row 6:Rset + ACL	-27.17	-57.06 to 2.724	No	ns	0.139
																				Row 6:hEPSC + ACL vs. Row 6:hEPSC +ACLi	41.23	11.34 to 71.12	Yes	***	0.0002
																				Row 6:hEPSC + ACL vs. Row 6:Rset + ACLi	35.58	5.693 to 65.47	Yes	**	0.0038
																				Row 6:hEPSC + ACL vs. Row 6:hESC +ACL	11.19	-18.7 to 41.08	No	ns	>0.9999
																				Row 6:hEPSC + ACL vs. Row 6:hESC + ACLi	42.85	12.96 to 72.74	Yes	****	<0.0001
																				Row 6:hEPSC + ACL vs. Row 7:hEPSC + ACL	-7.25	-37.14 to 22.64	No	ns	>0.9999
																				Row 6:hEPSC + ACL vs. Row 7:Rset + ACL	-27.13	-57.02 to 2.766	No	ns	0.141
																				Row 6:hEPSC + ACL vs. Row 7:hEPSC +ACLi	42.81	12.92 to 72.7	Yes	****	<0.0001
																				Row 6:hEPSC + ACL vs. Row 7:Rset + ACLi	37.77	7.88 to 67.66	Yes	**	0.0012
																				Row 6:hEPSC + ACL vs. Row 7:hESC +ACL	-12.15	-42.04 to 17.74	No	ns	0.9998
																				Row 6:hEPSC + ACL vs. Row 7:hESC + ACLi	42.85	12.96 to 72.74	Yes	****	<0.0001
																				Row 6:Rset + ACL vs. Row 6:hEPSC +ACLi	68.4	38.51 to 98.29	Yes	****	<0.0001
																				Row 6:Rset + ACL vs. Row 6:Rset + ACLi	62.75	32.86 to 92.64	Yes	****	<0.0001
																				Row 6:Rset + ACL vs. Row 6:hESC +ACL	38.35	8.463 to 68.24	Yes	***	0.0009
																				Row 6:Rset + ACL vs. Row 6:hESC + ACLi	70.02	40.13 to 99.91	Yes	****	<0.0001
																				Row 6:Rset + ACL vs. Row 7:hEPSC + ACL	19.92	-9.974 to 49.81	No	ns	0.7688
																				Row 6:Rset + ACL vs. Row 7:Rset + ACL	0.04167	-29.85 to 29.93	No	ns	>0.9999
																				Row 6:Rset + ACL vs. Row 7:hEPSC +ACLi	69.98	40.09 to 99.87	Yes	****	<0.0001
																				Row 6:Rset + ACL vs. Row 7:Rset + ACLi	64.94	35.05 to 94.83	Yes	****	<0.0001
																				Row 6:Rset + ACL vs. Row 7:hESC +ACL	15.02	-14.87 to 44.91	No	ns	0.9914
																				Row 6:Rset + ACL vs. Row 7:hESC + ACLi	70.02	40.13 to 99.91	Yes	****	<0.0001
																				Row 6:hEPSC +ACLi vs. Row 6:Rset + ACLi	-5.646	-35.54 to 24.24	No	ns	>0.9999
																				Row 6:hEPSC +ACLi vs. Row 6:hESC +ACL	-30.04	-59.93 to -0.1509	Yes	*	0.047
																				Row 6:hEPSC +ACLi vs. Row 6:hESC + ACLi	1.625	-28.27 to 31.52	No	ns	>0.9999
																				Row 6:hEPSC +ACLi vs. Row 7:hEPSC + ACL	-48.48	-78.37 to -18.59	Yes	****	<0.0001
																				Row 6:hEPSC +ACLi vs. Row 7:Rset + ACL	-68.35	-98.24 to -38.46	Yes	****	<0.0001
																				Row 6:hEPSC +ACLi vs. Row 7:hEPSC +ACLi	1.583	-28.31 to 31.47	No	ns	>0.9999
																				Row 6:hEPSC +ACLi vs. Row 7:Rset + ACLi	-3.458	-33.35 to 26.43	No	ns	>0.9999
																				Row 6:hEPSC +ACLi vs. Row 7:hESC +ACL	-53.38	-83.27 to -23.48	Yes	****	<0.0001
																				Row 6:hEPSC +ACLi vs. Row 7:hESC + ACLi	1.625	-28.27 to 31.52	No	ns	>0.9999
																				Row 6:Rset + ACLi vs. Row 6:hESC +ACL	-24.4	-54.29 to 5.495	No	ns	0.3247
																				Row 6:Rset + ACLi vs. Row 6:hESC + ACLi	7.271	-22.62 to 37.16	No	ns	>0.9999
																				Row 6:Rset + ACLi vs. Row 7:hEPSC + ACL	-42.83	-72.72 to -12.94	Yes	****	<0.0001
																				Row 6:Rset + ACLi vs. Row 7:Rset + ACL	-62.71	-92.6 to -32.82	Yes	****	<0.0001
																				Row 6:Rset + ACLi vs. Row 7:hEPSC +ACLi	7.229	-22.66 to 37.12	No	ns	>0.9999
																				Row 6:Rset + ACLi vs. Row 7:Rset + ACLi	2.188	-27.7 to 32.08	No	ns	>0.9999
																				Row 6:Rset + ACLi vs. Row 7:hESC +ACL	-47.73	-77.62 to -17.84	Yes	****	<0.0001
																				Row 6:Rset + ACLi vs. Row 7:hESC + ACLi	7.271	-22.62 to 37.16	No	ns	>0.9999
																				Row 6:hESC +ACL vs. Row 6:hESC + ACLi	31.67	1.776 to 61.56	Yes	*	0.0237
																				Row 6:hESC +ACL vs. Row 7:hEPSC + ACL	-18.44	-48.33 to 11.45	No	ns	0.8824
																				Row 6:hESC +ACL vs. Row 7:Rset + ACL	-38.31	-68.2 to -8.422	Yes	***	0.0009
																				Row 6:hESC +ACL vs. Row 7:hEPSC +ACLi	31.63	1.734 to 61.52	Yes	*	0.0241
																				Row 6:hESC +ACL vs. Row 7:Rset + ACLi	26.58	-3.307 to 56.47	No	ns	0.1691
																				Row 6:hESC +ACL vs. Row 7:hESC +ACL	-23.33	-53.22 to 6.557	No	ns	0.4232
																				Row 6:hESC +ACL vs. Row 7:hESC + ACLi	31.67	1.776 to 61.56	Yes	*	0.0237
																				Row 6:hESC + ACLi vs. Row 7:hEPSC + ACL	-50.1	-79.99 to -20.21	Yes	****	<0.0001
																				Row 6:hESC + ACLi vs. Row 7:Rset + ACL	-69.98	-99.87 to -40.09	Yes	****	<0.0001
																				Row 6:hESC + ACLi vs. Row 7:hEPSC +ACLi	-0.04167	-29.93 to 29.85	No	ns	>0.9999
																				Row 6:hESC + ACLi vs. Row 7:Rset + ACLi	-5.083	-34.97 to 24.81	No	ns	>0.9999
																				Row 6:hESC + ACLi vs. Row 7:hESC +ACL	-55	-84.89 to -25.11	Yes	****	<0.0001
																				Row 6:hESC + ACLi vs. Row 7:hESC + ACLi	0	-29.89 to 29.89	No	ns	>0.9999
																				Row 7:hEPSC + ACL vs. Row 7:Rset + ACL	-19.88	-49.77 to 10.02	No	ns	0.7725
																				Row 7:hEPSC + ACL vs. Row 7:hEPSC +ACLi	50.06	20.17 to 79.95	Yes	****	<0.0001
																				Row 7:hEPSC + ACL vs. Row 7:Rset + ACLi	45.02	15.13 to 74.91	Yes	****	<0.0001
																				Row 7:hEPSC + ACL vs. Row 7:hESC +ACL	-4.896	-34.79 to 24.99	No	ns	>0.9999
																				Row 7:hEPSC + ACL vs. Row 7:hESC + ACLi	50.1	20.21 to 79.99	Yes	****	<0.0001
																				Row 7:Rset + ACL vs. Row 7:hEPSC +ACLi	69.94	40.05 to 99.83	Yes	****	<0.0001
																				Row 7:Rset + ACL vs. Row 7:Rset + ACLi	64.9	35.01 to 94.79	Yes	****	<0.0001
																				Row 7:Rset + ACL vs. Row 7:hESC +ACL	14.98	-14.91 to 44.87	No	ns	0.9917
																				Row 7:Rset + ACL vs. Row 7:hESC + ACLi	69.98	40.09 to 99.87	Yes	****	<0.0001
																				Row 7:hEPSC +ACLi vs. Row 7:Rset + ACLi	-5.042	-34.93 to 24.85	No	ns	>0.9999
																				Row 7:hEPSC +ACLi vs. Row 7:hESC +ACL	-54.96	-84.85 to -25.07	Yes	****	<0.0001
																				Row 7:hEPSC +ACLi vs. Row 7:hESC + ACLi	0.04167	-29.85 to 29.93	No	ns	>0.9999
																				Row 7:Rset + ACLi vs. Row 7:hESC +ACL	-49.92	-79.81 to -20.03	Yes	****	<0.0001
																				Row 7:Rset + ACLi vs. Row 7:hESC + ACLi	5.083	-24.81 to 34.97	No	ns	>0.9999
																				Row 7:hESC +ACL vs. Row 7:hESC + ACLi	55	25.11 to 84.89	Yes	****	<0.0001
																				Test details	Mean 1	Mean 2	Mean Diff.	SE of diff.	N1	N2	q	DF
																				Row 1:hEPSC + ACL vs. Row 1:Rset + ACL	1	1	0	7.362	3	3	0	84
																				Row 1:hEPSC + ACL vs. Row 1:hEPSC +ACLi	1	1	0	7.362	3	3	0	84
																				Row 1:hEPSC + ACL vs. Row 1:Rset + ACLi	1	1	0	7.362	3	3	0	84
																				Row 1:hEPSC + ACL vs. Row 1:hESC +ACL	1	1	0	7.362	3	3	0	84
																				Row 1:hEPSC + ACL vs. Row 1:hESC + ACLi	1	1	0	7.362	3	3	0	84
																				Row 1:hEPSC + ACL vs. Row 2:hEPSC + ACL	1	3.271	-2.271	7.362	3	3	0.4362	84
																				Row 1:hEPSC + ACL vs. Row 2:Rset + ACL	1	3.313	-2.313	7.362	3	3	0.4442	84
																				Row 1:hEPSC + ACL vs. Row 2:hEPSC +ACLi	1	1.979	-0.9792	7.362	3	3	0.1881	84
																				Row 1:hEPSC + ACL vs. Row 2:Rset + ACLi	1	2.065	-1.065	7.362	3	3	0.2046	84
																				Row 1:hEPSC + ACL vs. Row 2:hESC +ACL	1	1.85	-0.85	7.362	3	3	0.1633	84
																				Row 1:hEPSC + ACL vs. Row 2:hESC + ACLi	1	0.8958	0.1042	7.362	3	3	0.02001	84
																				Row 1:hEPSC + ACL vs. Row 3:hEPSC + ACL	1	9.558	-8.558	7.362	3	3	1.644	84
																				Row 1:hEPSC + ACL vs. Row 3:Rset + ACL	1	10.79	-9.792	7.362	3	3	1.881	84
																				Row 1:hEPSC + ACL vs. Row 3:hEPSC +ACLi	1	2.563	-1.563	7.362	3	3	0.3001	84
																				Row 1:hEPSC + ACL vs. Row 3:Rset + ACLi	1	5.229	-4.229	7.362	3	3	0.8124	84
																				Row 1:hEPSC + ACL vs. Row 3:hESC +ACL	1	3.813	-2.813	7.362	3	3	0.5403	84
																				Row 1:hEPSC + ACL vs. Row 3:hESC + ACLi	1	1.396	-0.3958	7.362	3	3	0.07604	84
																				Row 1:hEPSC + ACL vs. Row 4:hEPSC + ACL	1	18.46	-17.46	7.362	3	3	3.354	84
																				Row 1:hEPSC + ACL vs. Row 4:Rset + ACL	1	25.56	-24.56	7.362	3	3	4.718	84
																				Row 1:hEPSC + ACL vs. Row 4:hEPSC +ACLi	1	3.083	-2.083	7.362	3	3	0.4002	84
																				Row 1:hEPSC + ACL vs. Row 4:Rset + ACLi	1	8.625	-7.625	7.362	3	3	1.465	84
																				Row 1:hEPSC + ACL vs. Row 4:hESC +ACL	1	7.5	-6.5	7.362	3	3	1.249	84
																				Row 1:hEPSC + ACL vs. Row 4:hESC + ACLi	1	1.438	-0.4375	7.362	3	3	0.08404	84
																				Row 1:hEPSC + ACL vs. Row 5:hEPSC + ACL	1	31.17	-30.17	7.362	3	3	5.795	84
																				Row 1:hEPSC + ACL vs. Row 5:Rset + ACL	1	57.33	-56.33	7.362	3	3	10.82	84
																				Row 1:hEPSC + ACL vs. Row 5:hEPSC +ACLi	1	3.708	-2.708	7.362	3	3	0.5203	84
																				Row 1:hEPSC + ACL vs. Row 5:Rset + ACLi	1	8	-7	7.362	3	3	1.345	84
																				Row 1:hEPSC + ACL vs. Row 5:hESC +ACL	1	15.19	-14.19	7.362	3	3	2.725	84
																				Row 1:hEPSC + ACL vs. Row 5:hESC + ACLi	1	1.104	-0.1042	7.362	3	3	0.02001	84
																				Row 1:hEPSC + ACL vs. Row 6:hEPSC + ACL	1	43.96	-42.96	7.362	3	3	8.252	84
																				Row 1:hEPSC + ACL vs. Row 6:Rset + ACL	1	71.13	-70.13	7.362	3	3	13.47	84
																				Row 1:hEPSC + ACL vs. Row 6:hEPSC +ACLi	1	2.729	-1.729	7.362	3	3	0.3322	84
																				Row 1:hEPSC + ACL vs. Row 6:Rset + ACLi	1	8.375	-7.375	7.362	3	3	1.417	84
																				Row 1:hEPSC + ACL vs. Row 6:hESC +ACL	1	32.77	-31.77	7.362	3	3	6.103	84
																				Row 1:hEPSC + ACL vs. Row 6:hESC + ACLi	1	1.104	-0.1042	7.362	3	3	0.02001	84
																				Row 1:hEPSC + ACL vs. Row 7:hEPSC + ACL	1	51.21	-50.21	7.362	3	3	9.645	84
																				Row 1:hEPSC + ACL vs. Row 7:Rset + ACL	1	71.08	-70.08	7.362	3	3	13.46	84
																				Row 1:hEPSC + ACL vs. Row 7:hEPSC +ACLi	1	1.146	-0.1458	7.362	3	3	0.02801	84
																				Row 1:hEPSC + ACL vs. Row 7:Rset + ACLi	1	6.188	-5.188	7.362	3	3	0.9965	84
																				Row 1:hEPSC + ACL vs. Row 7:hESC +ACL	1	56.1	-55.1	7.362	3	3	10.59	84
																				Row 1:hEPSC + ACL vs. Row 7:hESC + ACLi	1	1.104	-0.1042	7.362	3	3	0.02001	84
																				Row 1:Rset + ACL vs. Row 1:hEPSC +ACLi	1	1	0	7.362	3	3	0	84
																				Row 1:Rset + ACL vs. Row 1:Rset + ACLi	1	1	0	7.362	3	3	0	84
																				Row 1:Rset + ACL vs. Row 1:hESC +ACL	1	1	0	7.362	3	3	0	84
																				Row 1:Rset + ACL vs. Row 1:hESC + ACLi	1	1	0	7.362	3	3	0	84
																				Row 1:Rset + ACL vs. Row 2:hEPSC + ACL	1	3.271	-2.271	7.362	3	3	0.4362	84
																				Row 1:Rset + ACL vs. Row 2:Rset + ACL	1	3.313	-2.313	7.362	3	3	0.4442	84
																				Row 1:Rset + ACL vs. Row 2:hEPSC +ACLi	1	1.979	-0.9792	7.362	3	3	0.1881	84
																				Row 1:Rset + ACL vs. Row 2:Rset + ACLi	1	2.065	-1.065	7.362	3	3	0.2046	84
																				Row 1:Rset + ACL vs. Row 2:hESC +ACL	1	1.85	-0.85	7.362	3	3	0.1633	84
																				Row 1:Rset + ACL vs. Row 2:hESC + ACLi	1	0.8958	0.1042	7.362	3	3	0.02001	84
																				Row 1:Rset + ACL vs. Row 3:hEPSC + ACL	1	9.558	-8.558	7.362	3	3	1.644	84
																				Row 1:Rset + ACL vs. Row 3:Rset + ACL	1	10.79	-9.792	7.362	3	3	1.881	84
																				Row 1:Rset + ACL vs. Row 3:hEPSC +ACLi	1	2.563	-1.563	7.362	3	3	0.3001	84
																				Row 1:Rset + ACL vs. Row 3:Rset + ACLi	1	5.229	-4.229	7.362	3	3	0.8124	84
																				Row 1:Rset + ACL vs. Row 3:hESC +ACL	1	3.813	-2.813	7.362	3	3	0.5403	84
																				Row 1:Rset + ACL vs. Row 3:hESC + ACLi	1	1.396	-0.3958	7.362	3	3	0.07604	84
																				Row 1:Rset + ACL vs. Row 4:hEPSC + ACL	1	18.46	-17.46	7.362	3	3	3.354	84
																				Row 1:Rset + ACL vs. Row 4:Rset + ACL	1	25.56	-24.56	7.362	3	3	4.718	84
																				Row 1:Rset + ACL vs. Row 4:hEPSC +ACLi	1	3.083	-2.083	7.362	3	3	0.4002	84
																				Row 1:Rset + ACL vs. Row 4:Rset + ACLi	1	8.625	-7.625	7.362	3	3	1.465	84
																				Row 1:Rset + ACL vs. Row 4:hESC +ACL	1	7.5	-6.5	7.362	3	3	1.249	84
																				Row 1:Rset + ACL vs. Row 4:hESC + ACLi	1	1.438	-0.4375	7.362	3	3	0.08404	84
																				Row 1:Rset + ACL vs. Row 5:hEPSC + ACL	1	31.17	-30.17	7.362	3	3	5.795	84
																				Row 1:Rset + ACL vs. Row 5:Rset + ACL	1	57.33	-56.33	7.362	3	3	10.82	84
																				Row 1:Rset + ACL vs. Row 5:hEPSC +ACLi	1	3.708	-2.708	7.362	3	3	0.5203	84
																				Row 1:Rset + ACL vs. Row 5:Rset + ACLi	1	8	-7	7.362	3	3	1.345	84
																				Row 1:Rset + ACL vs. Row 5:hESC +ACL	1	15.19	-14.19	7.362	3	3	2.725	84
																				Row 1:Rset + ACL vs. Row 5:hESC + ACLi	1	1.104	-0.1042	7.362	3	3	0.02001	84
																				Row 1:Rset + ACL vs. Row 6:hEPSC + ACL	1	43.96	-42.96	7.362	3	3	8.252	84
																				Row 1:Rset + ACL vs. Row 6:Rset + ACL	1	71.13	-70.13	7.362	3	3	13.47	84
																				Row 1:Rset + ACL vs. Row 6:hEPSC +ACLi	1	2.729	-1.729	7.362	3	3	0.3322	84
																				Row 1:Rset + ACL vs. Row 6:Rset + ACLi	1	8.375	-7.375	7.362	3	3	1.417	84
																				Row 1:Rset + ACL vs. Row 6:hESC +ACL	1	32.77	-31.77	7.362	3	3	6.103	84
																				Row 1:Rset + ACL vs. Row 6:hESC + ACLi	1	1.104	-0.1042	7.362	3	3	0.02001	84
																				Row 1:Rset + ACL vs. Row 7:hEPSC + ACL	1	51.21	-50.21	7.362	3	3	9.645	84
																				Row 1:Rset + ACL vs. Row 7:Rset + ACL	1	71.08	-70.08	7.362	3	3	13.46	84
																				Row 1:Rset + ACL vs. Row 7:hEPSC +ACLi	1	1.146	-0.1458	7.362	3	3	0.02801	84
																				Row 1:Rset + ACL vs. Row 7:Rset + ACLi	1	6.188	-5.188	7.362	3	3	0.9965	84
																				Row 1:Rset + ACL vs. Row 7:hESC +ACL	1	56.1	-55.1	7.362	3	3	10.59	84
																				Row 1:Rset + ACL vs. Row 7:hESC + ACLi	1	1.104	-0.1042	7.362	3	3	0.02001	84
																				Row 1:hEPSC +ACLi vs. Row 1:Rset + ACLi	1	1	0	7.362	3	3	0	84
																				Row 1:hEPSC +ACLi vs. Row 1:hESC +ACL	1	1	0	7.362	3	3	0	84
																				Row 1:hEPSC +ACLi vs. Row 1:hESC + ACLi	1	1	0	7.362	3	3	0	84
																				Row 1:hEPSC +ACLi vs. Row 2:hEPSC + ACL	1	3.271	-2.271	7.362	3	3	0.4362	84
																				Row 1:hEPSC +ACLi vs. Row 2:Rset + ACL	1	3.313	-2.313	7.362	3	3	0.4442	84
																				Row 1:hEPSC +ACLi vs. Row 2:hEPSC +ACLi	1	1.979	-0.9792	7.362	3	3	0.1881	84
																				Row 1:hEPSC +ACLi vs. Row 2:Rset + ACLi	1	2.065	-1.065	7.362	3	3	0.2046	84
																				Row 1:hEPSC +ACLi vs. Row 2:hESC +ACL	1	1.85	-0.85	7.362	3	3	0.1633	84
																				Row 1:hEPSC +ACLi vs. Row 2:hESC + ACLi	1	0.8958	0.1042	7.362	3	3	0.02001	84
																				Row 1:hEPSC +ACLi vs. Row 3:hEPSC + ACL	1	9.558	-8.558	7.362	3	3	1.644	84
																				Row 1:hEPSC +ACLi vs. Row 3:Rset + ACL	1	10.79	-9.792	7.362	3	3	1.881	84
																				Row 1:hEPSC +ACLi vs. Row 3:hEPSC +ACLi	1	2.563	-1.563	7.362	3	3	0.3001	84
																				Row 1:hEPSC +ACLi vs. Row 3:Rset + ACLi	1	5.229	-4.229	7.362	3	3	0.8124	84
																				Row 1:hEPSC +ACLi vs. Row 3:hESC +ACL	1	3.813	-2.813	7.362	3	3	0.5403	84
																				Row 1:hEPSC +ACLi vs. Row 3:hESC + ACLi	1	1.396	-0.3958	7.362	3	3	0.07604	84
																				Row 1:hEPSC +ACLi vs. Row 4:hEPSC + ACL	1	18.46	-17.46	7.362	3	3	3.354	84
																				Row 1:hEPSC +ACLi vs. Row 4:Rset + ACL	1	25.56	-24.56	7.362	3	3	4.718	84
																				Row 1:hEPSC +ACLi vs. Row 4:hEPSC +ACLi	1	3.083	-2.083	7.362	3	3	0.4002	84
																				Row 1:hEPSC +ACLi vs. Row 4:Rset + ACLi	1	8.625	-7.625	7.362	3	3	1.465	84
																				Row 1:hEPSC +ACLi vs. Row 4:hESC +ACL	1	7.5	-6.5	7.362	3	3	1.249	84
																				Row 1:hEPSC +ACLi vs. Row 4:hESC + ACLi	1	1.438	-0.4375	7.362	3	3	0.08404	84
																				Row 1:hEPSC +ACLi vs. Row 5:hEPSC + ACL	1	31.17	-30.17	7.362	3	3	5.795	84
																				Row 1:hEPSC +ACLi vs. Row 5:Rset + ACL	1	57.33	-56.33	7.362	3	3	10.82	84
																				Row 1:hEPSC +ACLi vs. Row 5:hEPSC +ACLi	1	3.708	-2.708	7.362	3	3	0.5203	84
																				Row 1:hEPSC +ACLi vs. Row 5:Rset + ACLi	1	8	-7	7.362	3	3	1.345	84
																				Row 1:hEPSC +ACLi vs. Row 5:hESC +ACL	1	15.19	-14.19	7.362	3	3	2.725	84
																				Row 1:hEPSC +ACLi vs. Row 5:hESC + ACLi	1	1.104	-0.1042	7.362	3	3	0.02001	84
																				Row 1:hEPSC +ACLi vs. Row 6:hEPSC + ACL	1	43.96	-42.96	7.362	3	3	8.252	84
																				Row 1:hEPSC +ACLi vs. Row 6:Rset + ACL	1	71.13	-70.13	7.362	3	3	13.47	84
																				Row 1:hEPSC +ACLi vs. Row 6:hEPSC +ACLi	1	2.729	-1.729	7.362	3	3	0.3322	84
																				Row 1:hEPSC +ACLi vs. Row 6:Rset + ACLi	1	8.375	-7.375	7.362	3	3	1.417	84
																				Row 1:hEPSC +ACLi vs. Row 6:hESC +ACL	1	32.77	-31.77	7.362	3	3	6.103	84
																				Row 1:hEPSC +ACLi vs. Row 6:hESC + ACLi	1	1.104	-0.1042	7.362	3	3	0.02001	84
																				Row 1:hEPSC +ACLi vs. Row 7:hEPSC + ACL	1	51.21	-50.21	7.362	3	3	9.645	84
																				Row 1:hEPSC +ACLi vs. Row 7:Rset + ACL	1	71.08	-70.08	7.362	3	3	13.46	84
																				Row 1:hEPSC +ACLi vs. Row 7:hEPSC +ACLi	1	1.146	-0.1458	7.362	3	3	0.02801	84
																				Row 1:hEPSC +ACLi vs. Row 7:Rset + ACLi	1	6.188	-5.188	7.362	3	3	0.9965	84
																				Row 1:hEPSC +ACLi vs. Row 7:hESC +ACL	1	56.1	-55.1	7.362	3	3	10.59	84
																				Row 1:hEPSC +ACLi vs. Row 7:hESC + ACLi	1	1.104	-0.1042	7.362	3	3	0.02001	84
																				Row 1:Rset + ACLi vs. Row 1:hESC +ACL	1	1	0	7.362	3	3	0	84
																				Row 1:Rset + ACLi vs. Row 1:hESC + ACLi	1	1	0	7.362	3	3	0	84
																				Row 1:Rset + ACLi vs. Row 2:hEPSC + ACL	1	3.271	-2.271	7.362	3	3	0.4362	84
																				Row 1:Rset + ACLi vs. Row 2:Rset + ACL	1	3.313	-2.313	7.362	3	3	0.4442	84
																				Row 1:Rset + ACLi vs. Row 2:hEPSC +ACLi	1	1.979	-0.9792	7.362	3	3	0.1881	84
																				Row 1:Rset + ACLi vs. Row 2:Rset + ACLi	1	2.065	-1.065	7.362	3	3	0.2046	84
																				Row 1:Rset + ACLi vs. Row 2:hESC +ACL	1	1.85	-0.85	7.362	3	3	0.1633	84
																				Row 1:Rset + ACLi vs. Row 2:hESC + ACLi	1	0.8958	0.1042	7.362	3	3	0.02001	84
																				Row 1:Rset + ACLi vs. Row 3:hEPSC + ACL	1	9.558	-8.558	7.362	3	3	1.644	84
																				Row 1:Rset + ACLi vs. Row 3:Rset + ACL	1	10.79	-9.792	7.362	3	3	1.881	84
																				Row 1:Rset + ACLi vs. Row 3:hEPSC +ACLi	1	2.563	-1.563	7.362	3	3	0.3001	84
																				Row 1:Rset + ACLi vs. Row 3:Rset + ACLi	1	5.229	-4.229	7.362	3	3	0.8124	84
																				Row 1:Rset + ACLi vs. Row 3:hESC +ACL	1	3.813	-2.813	7.362	3	3	0.5403	84
																				Row 1:Rset + ACLi vs. Row 3:hESC + ACLi	1	1.396	-0.3958	7.362	3	3	0.07604	84
																				Row 1:Rset + ACLi vs. Row 4:hEPSC + ACL	1	18.46	-17.46	7.362	3	3	3.354	84
																				Row 1:Rset + ACLi vs. Row 4:Rset + ACL	1	25.56	-24.56	7.362	3	3	4.718	84
																				Row 1:Rset + ACLi vs. Row 4:hEPSC +ACLi	1	3.083	-2.083	7.362	3	3	0.4002	84
																				Row 1:Rset + ACLi vs. Row 4:Rset + ACLi	1	8.625	-7.625	7.362	3	3	1.465	84
																				Row 1:Rset + ACLi vs. Row 4:hESC +ACL	1	7.5	-6.5	7.362	3	3	1.249	84
																				Row 1:Rset + ACLi vs. Row 4:hESC + ACLi	1	1.438	-0.4375	7.362	3	3	0.08404	84
																				Row 1:Rset + ACLi vs. Row 5:hEPSC + ACL	1	31.17	-30.17	7.362	3	3	5.795	84
																				Row 1:Rset + ACLi vs. Row 5:Rset + ACL	1	57.33	-56.33	7.362	3	3	10.82	84
																				Row 1:Rset + ACLi vs. Row 5:hEPSC +ACLi	1	3.708	-2.708	7.362	3	3	0.5203	84
																				Row 1:Rset + ACLi vs. Row 5:Rset + ACLi	1	8	-7	7.362	3	3	1.345	84
																				Row 1:Rset + ACLi vs. Row 5:hESC +ACL	1	15.19	-14.19	7.362	3	3	2.725	84
																				Row 1:Rset + ACLi vs. Row 5:hESC + ACLi	1	1.104	-0.1042	7.362	3	3	0.02001	84
																				Row 1:Rset + ACLi vs. Row 6:hEPSC + ACL	1	43.96	-42.96	7.362	3	3	8.252	84
																				Row 1:Rset + ACLi vs. Row 6:Rset + ACL	1	71.13	-70.13	7.362	3	3	13.47	84
																				Row 1:Rset + ACLi vs. Row 6:hEPSC +ACLi	1	2.729	-1.729	7.362	3	3	0.3322	84
																				Row 1:Rset + ACLi vs. Row 6:Rset + ACLi	1	8.375	-7.375	7.362	3	3	1.417	84
																				Row 1:Rset + ACLi vs. Row 6:hESC +ACL	1	32.77	-31.77	7.362	3	3	6.103	84
																				Row 1:Rset + ACLi vs. Row 6:hESC + ACLi	1	1.104	-0.1042	7.362	3	3	0.02001	84
																				Row 1:Rset + ACLi vs. Row 7:hEPSC + ACL	1	51.21	-50.21	7.362	3	3	9.645	84
																				Row 1:Rset + ACLi vs. Row 7:Rset + ACL	1	71.08	-70.08	7.362	3	3	13.46	84
																				Row 1:Rset + ACLi vs. Row 7:hEPSC +ACLi	1	1.146	-0.1458	7.362	3	3	0.02801	84
																				Row 1:Rset + ACLi vs. Row 7:Rset + ACLi	1	6.188	-5.188	7.362	3	3	0.9965	84
																				Row 1:Rset + ACLi vs. Row 7:hESC +ACL	1	56.1	-55.1	7.362	3	3	10.59	84
																				Row 1:Rset + ACLi vs. Row 7:hESC + ACLi	1	1.104	-0.1042	7.362	3	3	0.02001	84
																				Row 1:hESC +ACL vs. Row 1:hESC + ACLi	1	1	0	7.362	3	3	0	84
																				Row 1:hESC +ACL vs. Row 2:hEPSC + ACL	1	3.271	-2.271	7.362	3	3	0.4362	84
																				Row 1:hESC +ACL vs. Row 2:Rset + ACL	1	3.313	-2.313	7.362	3	3	0.4442	84
																				Row 1:hESC +ACL vs. Row 2:hEPSC +ACLi	1	1.979	-0.9792	7.362	3	3	0.1881	84
																				Row 1:hESC +ACL vs. Row 2:Rset + ACLi	1	2.065	-1.065	7.362	3	3	0.2046	84
																				Row 1:hESC +ACL vs. Row 2:hESC +ACL	1	1.85	-0.85	7.362	3	3	0.1633	84
																				Row 1:hESC +ACL vs. Row 2:hESC + ACLi	1	0.8958	0.1042	7.362	3	3	0.02001	84
																				Row 1:hESC +ACL vs. Row 3:hEPSC + ACL	1	9.558	-8.558	7.362	3	3	1.644	84
																				Row 1:hESC +ACL vs. Row 3:Rset + ACL	1	10.79	-9.792	7.362	3	3	1.881	84
																				Row 1:hESC +ACL vs. Row 3:hEPSC +ACLi	1	2.563	-1.563	7.362	3	3	0.3001	84
																				Row 1:hESC +ACL vs. Row 3:Rset + ACLi	1	5.229	-4.229	7.362	3	3	0.8124	84
																				Row 1:hESC +ACL vs. Row 3:hESC +ACL	1	3.813	-2.813	7.362	3	3	0.5403	84
																				Row 1:hESC +ACL vs. Row 3:hESC + ACLi	1	1.396	-0.3958	7.362	3	3	0.07604	84
																				Row 1:hESC +ACL vs. Row 4:hEPSC + ACL	1	18.46	-17.46	7.362	3	3	3.354	84
																				Row 1:hESC +ACL vs. Row 4:Rset + ACL	1	25.56	-24.56	7.362	3	3	4.718	84
																				Row 1:hESC +ACL vs. Row 4:hEPSC +ACLi	1	3.083	-2.083	7.362	3	3	0.4002	84
																				Row 1:hESC +ACL vs. Row 4:Rset + ACLi	1	8.625	-7.625	7.362	3	3	1.465	84
																				Row 1:hESC +ACL vs. Row 4:hESC +ACL	1	7.5	-6.5	7.362	3	3	1.249	84
																				Row 1:hESC +ACL vs. Row 4:hESC + ACLi	1	1.438	-0.4375	7.362	3	3	0.08404	84
																				Row 1:hESC +ACL vs. Row 5:hEPSC + ACL	1	31.17	-30.17	7.362	3	3	5.795	84
																				Row 1:hESC +ACL vs. Row 5:Rset + ACL	1	57.33	-56.33	7.362	3	3	10.82	84
																				Row 1:hESC +ACL vs. Row 5:hEPSC +ACLi	1	3.708	-2.708	7.362	3	3	0.5203	84
																				Row 1:hESC +ACL vs. Row 5:Rset + ACLi	1	8	-7	7.362	3	3	1.345	84
																				Row 1:hESC +ACL vs. Row 5:hESC +ACL	1	15.19	-14.19	7.362	3	3	2.725	84
																				Row 1:hESC +ACL vs. Row 5:hESC + ACLi	1	1.104	-0.1042	7.362	3	3	0.02001	84
																				Row 1:hESC +ACL vs. Row 6:hEPSC + ACL	1	43.96	-42.96	7.362	3	3	8.252	84
																				Row 1:hESC +ACL vs. Row 6:Rset + ACL	1	71.13	-70.13	7.362	3	3	13.47	84
																				Row 1:hESC +ACL vs. Row 6:hEPSC +ACLi	1	2.729	-1.729	7.362	3	3	0.3322	84
																				Row 1:hESC +ACL vs. Row 6:Rset + ACLi	1	8.375	-7.375	7.362	3	3	1.417	84
																				Row 1:hESC +ACL vs. Row 6:hESC +ACL	1	32.77	-31.77	7.362	3	3	6.103	84
																				Row 1:hESC +ACL vs. Row 6:hESC + ACLi	1	1.104	-0.1042	7.362	3	3	0.02001	84
																				Row 1:hESC +ACL vs. Row 7:hEPSC + ACL	1	51.21	-50.21	7.362	3	3	9.645	84
																				Row 1:hESC +ACL vs. Row 7:Rset + ACL	1	71.08	-70.08	7.362	3	3	13.46	84
																				Row 1:hESC +ACL vs. Row 7:hEPSC +ACLi	1	1.146	-0.1458	7.362	3	3	0.02801	84
																				Row 1:hESC +ACL vs. Row 7:Rset + ACLi	1	6.188	-5.188	7.362	3	3	0.9965	84
																				Row 1:hESC +ACL vs. Row 7:hESC +ACL	1	56.1	-55.1	7.362	3	3	10.59	84
																				Row 1:hESC +ACL vs. Row 7:hESC + ACLi	1	1.104	-0.1042	7.362	3	3	0.02001	84
																				Row 1:hESC + ACLi vs. Row 2:hEPSC + ACL	1	3.271	-2.271	7.362	3	3	0.4362	84
																				Row 1:hESC + ACLi vs. Row 2:Rset + ACL	1	3.313	-2.313	7.362	3	3	0.4442	84
																				Row 1:hESC + ACLi vs. Row 2:hEPSC +ACLi	1	1.979	-0.9792	7.362	3	3	0.1881	84
																				Row 1:hESC + ACLi vs. Row 2:Rset + ACLi	1	2.065	-1.065	7.362	3	3	0.2046	84
																				Row 1:hESC + ACLi vs. Row 2:hESC +ACL	1	1.85	-0.85	7.362	3	3	0.1633	84
																				Row 1:hESC + ACLi vs. Row 2:hESC + ACLi	1	0.8958	0.1042	7.362	3	3	0.02001	84
																				Row 1:hESC + ACLi vs. Row 3:hEPSC + ACL	1	9.558	-8.558	7.362	3	3	1.644	84
																				Row 1:hESC + ACLi vs. Row 3:Rset + ACL	1	10.79	-9.792	7.362	3	3	1.881	84
																				Row 1:hESC + ACLi vs. Row 3:hEPSC +ACLi	1	2.563	-1.563	7.362	3	3	0.3001	84
																				Row 1:hESC + ACLi vs. Row 3:Rset + ACLi	1	5.229	-4.229	7.362	3	3	0.8124	84
																				Row 1:hESC + ACLi vs. Row 3:hESC +ACL	1	3.813	-2.813	7.362	3	3	0.5403	84
																				Row 1:hESC + ACLi vs. Row 3:hESC + ACLi	1	1.396	-0.3958	7.362	3	3	0.07604	84
																				Row 1:hESC + ACLi vs. Row 4:hEPSC + ACL	1	18.46	-17.46	7.362	3	3	3.354	84
																				Row 1:hESC + ACLi vs. Row 4:Rset + ACL	1	25.56	-24.56	7.362	3	3	4.718	84
																				Row 1:hESC + ACLi vs. Row 4:hEPSC +ACLi	1	3.083	-2.083	7.362	3	3	0.4002	84
																				Row 1:hESC + ACLi vs. Row 4:Rset + ACLi	1	8.625	-7.625	7.362	3	3	1.465	84
																				Row 1:hESC + ACLi vs. Row 4:hESC +ACL	1	7.5	-6.5	7.362	3	3	1.249	84
																				Row 1:hESC + ACLi vs. Row 4:hESC + ACLi	1	1.438	-0.4375	7.362	3	3	0.08404	84
																				Row 1:hESC + ACLi vs. Row 5:hEPSC + ACL	1	31.17	-30.17	7.362	3	3	5.795	84
																				Row 1:hESC + ACLi vs. Row 5:Rset + ACL	1	57.33	-56.33	7.362	3	3	10.82	84
																				Row 1:hESC + ACLi vs. Row 5:hEPSC +ACLi	1	3.708	-2.708	7.362	3	3	0.5203	84
																				Row 1:hESC + ACLi vs. Row 5:Rset + ACLi	1	8	-7	7.362	3	3	1.345	84
																				Row 1:hESC + ACLi vs. Row 5:hESC +ACL	1	15.19	-14.19	7.362	3	3	2.725	84
																				Row 1:hESC + ACLi vs. Row 5:hESC + ACLi	1	1.104	-0.1042	7.362	3	3	0.02001	84
																				Row 1:hESC + ACLi vs. Row 6:hEPSC + ACL	1	43.96	-42.96	7.362	3	3	8.252	84
																				Row 1:hESC + ACLi vs. Row 6:Rset + ACL	1	71.13	-70.13	7.362	3	3	13.47	84
																				Row 1:hESC + ACLi vs. Row 6:hEPSC +ACLi	1	2.729	-1.729	7.362	3	3	0.3322	84
																				Row 1:hESC + ACLi vs. Row 6:Rset + ACLi	1	8.375	-7.375	7.362	3	3	1.417	84
																				Row 1:hESC + ACLi vs. Row 6:hESC +ACL	1	32.77	-31.77	7.362	3	3	6.103	84
																				Row 1:hESC + ACLi vs. Row 6:hESC + ACLi	1	1.104	-0.1042	7.362	3	3	0.02001	84
																				Row 1:hESC + ACLi vs. Row 7:hEPSC + ACL	1	51.21	-50.21	7.362	3	3	9.645	84
																				Row 1:hESC + ACLi vs. Row 7:Rset + ACL	1	71.08	-70.08	7.362	3	3	13.46	84
																				Row 1:hESC + ACLi vs. Row 7:hEPSC +ACLi	1	1.146	-0.1458	7.362	3	3	0.02801	84
																				Row 1:hESC + ACLi vs. Row 7:Rset + ACLi	1	6.188	-5.188	7.362	3	3	0.9965	84
																				Row 1:hESC + ACLi vs. Row 7:hESC +ACL	1	56.1	-55.1	7.362	3	3	10.59	84
																				Row 1:hESC + ACLi vs. Row 7:hESC + ACLi	1	1.104	-0.1042	7.362	3	3	0.02001	84
																				Row 2:hEPSC + ACL vs. Row 2:Rset + ACL	3.271	3.313	-0.04167	7.362	3	3	0.008004	84
																				Row 2:hEPSC + ACL vs. Row 2:hEPSC +ACLi	3.271	1.979	1.292	7.362	3	3	0.2481	84
																				Row 2:hEPSC + ACL vs. Row 2:Rset + ACLi	3.271	2.065	1.206	7.362	3	3	0.2316	84
																				Row 2:hEPSC + ACL vs. Row 2:hESC +ACL	3.271	1.85	1.421	7.362	3	3	0.2729	84
																				Row 2:hEPSC + ACL vs. Row 2:hESC + ACLi	3.271	0.8958	2.375	7.362	3	3	0.4562	84
																				Row 2:hEPSC + ACL vs. Row 3:hEPSC + ACL	3.271	9.558	-6.288	7.362	3	3	1.208	84
																				Row 2:hEPSC + ACL vs. Row 3:Rset + ACL	3.271	10.79	-7.521	7.362	3	3	1.445	84
																				Row 2:hEPSC + ACL vs. Row 3:hEPSC +ACLi	3.271	2.563	0.7083	7.362	3	3	0.1361	84
																				Row 2:hEPSC + ACL vs. Row 3:Rset + ACLi	3.271	5.229	-1.958	7.362	3	3	0.3762	84
																				Row 2:hEPSC + ACL vs. Row 3:hESC +ACL	3.271	3.813	-0.5417	7.362	3	3	0.1041	84
																				Row 2:hEPSC + ACL vs. Row 3:hESC + ACLi	3.271	1.396	1.875	7.362	3	3	0.3602	84
																				Row 2:hEPSC + ACL vs. Row 4:hEPSC + ACL	3.271	18.46	-15.19	7.362	3	3	2.917	84
																				Row 2:hEPSC + ACL vs. Row 4:Rset + ACL	3.271	25.56	-22.29	7.362	3	3	4.282	84
																				Row 2:hEPSC + ACL vs. Row 4:hEPSC +ACLi	3.271	3.083	0.1875	7.362	3	3	0.03602	84
																				Row 2:hEPSC + ACL vs. Row 4:Rset + ACLi	3.271	8.625	-5.354	7.362	3	3	1.028	84
																				Row 2:hEPSC + ACL vs. Row 4:hESC +ACL	3.271	7.5	-4.229	7.362	3	3	0.8124	84
																				Row 2:hEPSC + ACL vs. Row 4:hESC + ACLi	3.271	1.438	1.833	7.362	3	3	0.3522	84
																				Row 2:hEPSC + ACL vs. Row 5:hEPSC + ACL	3.271	31.17	-27.9	7.362	3	3	5.359	84
																				Row 2:hEPSC + ACL vs. Row 5:Rset + ACL	3.271	57.33	-54.06	7.362	3	3	10.39	84
																				Row 2:hEPSC + ACL vs. Row 5:hEPSC +ACLi	3.271	3.708	-0.4375	7.362	3	3	0.08404	84
																				Row 2:hEPSC + ACL vs. Row 5:Rset + ACLi	3.271	8	-4.729	7.362	3	3	0.9084	84
																				Row 2:hEPSC + ACL vs. Row 5:hESC +ACL	3.271	15.19	-11.92	7.362	3	3	2.289	84
																				Row 2:hEPSC + ACL vs. Row 5:hESC + ACLi	3.271	1.104	2.167	7.362	3	3	0.4162	84
																				Row 2:hEPSC + ACL vs. Row 6:hEPSC + ACL	3.271	43.96	-40.69	7.362	3	3	7.816	84
																				Row 2:hEPSC + ACL vs. Row 6:Rset + ACL	3.271	71.13	-67.85	7.362	3	3	13.03	84
																				Row 2:hEPSC + ACL vs. Row 6:hEPSC +ACLi	3.271	2.729	0.5417	7.362	3	3	0.1041	84
																				Row 2:hEPSC + ACL vs. Row 6:Rset + ACLi	3.271	8.375	-5.104	7.362	3	3	0.9805	84
																				Row 2:hEPSC + ACL vs. Row 6:hESC +ACL	3.271	32.77	-29.5	7.362	3	3	5.667	84
																				Row 2:hEPSC + ACL vs. Row 6:hESC + ACLi	3.271	1.104	2.167	7.362	3	3	0.4162	84
																				Row 2:hEPSC + ACL vs. Row 7:hEPSC + ACL	3.271	51.21	-47.94	7.362	3	3	9.208	84
																				Row 2:hEPSC + ACL vs. Row 7:Rset + ACL	3.271	71.08	-67.81	7.362	3	3	13.03	84
																				Row 2:hEPSC + ACL vs. Row 7:hEPSC +ACLi	3.271	1.146	2.125	7.362	3	3	0.4082	84
																				Row 2:hEPSC + ACL vs. Row 7:Rset + ACLi	3.271	6.188	-2.917	7.362	3	3	0.5603	84
																				Row 2:hEPSC + ACL vs. Row 7:hESC +ACL	3.271	56.1	-52.83	7.362	3	3	10.15	84
																				Row 2:hEPSC + ACL vs. Row 7:hESC + ACLi	3.271	1.104	2.167	7.362	3	3	0.4162	84
																				Row 2:Rset + ACL vs. Row 2:hEPSC +ACLi	3.313	1.979	1.333	7.362	3	3	0.2561	84
																				Row 2:Rset + ACL vs. Row 2:Rset + ACLi	3.313	2.065	1.248	7.362	3	3	0.2396	84
																				Row 2:Rset + ACL vs. Row 2:hESC +ACL	3.313	1.85	1.463	7.362	3	3	0.2809	84
																				Row 2:Rset + ACL vs. Row 2:hESC + ACLi	3.313	0.8958	2.417	7.362	3	3	0.4642	84
																				Row 2:Rset + ACL vs. Row 3:hEPSC + ACL	3.313	9.558	-6.246	7.362	3	3	1.2	84
																				Row 2:Rset + ACL vs. Row 3:Rset + ACL	3.313	10.79	-7.479	7.362	3	3	1.437	84
																				Row 2:Rset + ACL vs. Row 3:hEPSC +ACLi	3.313	2.563	0.75	7.362	3	3	0.1441	84
																				Row 2:Rset + ACL vs. Row 3:Rset + ACLi	3.313	5.229	-1.917	7.362	3	3	0.3682	84
																				Row 2:Rset + ACL vs. Row 3:hESC +ACL	3.313	3.813	-0.5	7.362	3	3	0.09605	84
																				Row 2:Rset + ACL vs. Row 3:hESC + ACLi	3.313	1.396	1.917	7.362	3	3	0.3682	84
																				Row 2:Rset + ACL vs. Row 4:hEPSC + ACL	3.313	18.46	-15.15	7.362	3	3	2.909	84
																				Row 2:Rset + ACL vs. Row 4:Rset + ACL	3.313	25.56	-22.25	7.362	3	3	4.274	84
																				Row 2:Rset + ACL vs. Row 4:hEPSC +ACLi	3.313	3.083	0.2292	7.362	3	3	0.04402	84
																				Row 2:Rset + ACL vs. Row 4:Rset + ACLi	3.313	8.625	-5.313	7.362	3	3	1.02	84
																				Row 2:Rset + ACL vs. Row 4:hESC +ACL	3.313	7.5	-4.188	7.362	3	3	0.8044	84
																				Row 2:Rset + ACL vs. Row 4:hESC + ACLi	3.313	1.438	1.875	7.362	3	3	0.3602	84
																				Row 2:Rset + ACL vs. Row 5:hEPSC + ACL	3.313	31.17	-27.85	7.362	3	3	5.351	84
																				Row 2:Rset + ACL vs. Row 5:Rset + ACL	3.313	57.33	-54.02	7.362	3	3	10.38	84
																				Row 2:Rset + ACL vs. Row 5:hEPSC +ACLi	3.313	3.708	-0.3958	7.362	3	3	0.07604	84
																				Row 2:Rset + ACL vs. Row 5:Rset + ACLi	3.313	8	-4.688	7.362	3	3	0.9004	84
																				Row 2:Rset + ACL vs. Row 5:hESC +ACL	3.313	15.19	-11.88	7.362	3	3	2.281	84
																				Row 2:Rset + ACL vs. Row 5:hESC + ACLi	3.313	1.104	2.208	7.362	3	3	0.4242	84
																				Row 2:Rset + ACL vs. Row 6:hEPSC + ACL	3.313	43.96	-40.65	7.362	3	3	7.808	84
																				Row 2:Rset + ACL vs. Row 6:Rset + ACL	3.313	71.13	-67.81	7.362	3	3	13.03	84
																				Row 2:Rset + ACL vs. Row 6:hEPSC +ACLi	3.313	2.729	0.5833	7.362	3	3	0.1121	84
																				Row 2:Rset + ACL vs. Row 6:Rset + ACLi	3.313	8.375	-5.063	7.362	3	3	0.9725	84
																				Row 2:Rset + ACL vs. Row 6:hESC +ACL	3.313	32.77	-29.46	7.362	3	3	5.659	84
																				Row 2:Rset + ACL vs. Row 6:hESC + ACLi	3.313	1.104	2.208	7.362	3	3	0.4242	84
																				Row 2:Rset + ACL vs. Row 7:hEPSC + ACL	3.313	51.21	-47.9	7.362	3	3	9.2	84
																				Row 2:Rset + ACL vs. Row 7:Rset + ACL	3.313	71.08	-67.77	7.362	3	3	13.02	84
																				Row 2:Rset + ACL vs. Row 7:hEPSC +ACLi	3.313	1.146	2.167	7.362	3	3	0.4162	84
																				Row 2:Rset + ACL vs. Row 7:Rset + ACLi	3.313	6.188	-2.875	7.362	3	3	0.5523	84
																				Row 2:Rset + ACL vs. Row 7:hESC +ACL	3.313	56.1	-52.79	7.362	3	3	10.14	84
																				Row 2:Rset + ACL vs. Row 7:hESC + ACLi	3.313	1.104	2.208	7.362	3	3	0.4242	84
																				Row 2:hEPSC +ACLi vs. Row 2:Rset + ACLi	1.979	2.065	-0.08583	7.362	3	3	0.01649	84
																				Row 2:hEPSC +ACLi vs. Row 2:hESC +ACL	1.979	1.85	0.1292	7.362	3	3	0.02481	84
																				Row 2:hEPSC +ACLi vs. Row 2:hESC + ACLi	1.979	0.8958	1.083	7.362	3	3	0.2081	84
																				Row 2:hEPSC +ACLi vs. Row 3:hEPSC + ACL	1.979	9.558	-7.579	7.362	3	3	1.456	84
																				Row 2:hEPSC +ACLi vs. Row 3:Rset + ACL	1.979	10.79	-8.813	7.362	3	3	1.693	84
																				Row 2:hEPSC +ACLi vs. Row 3:hEPSC +ACLi	1.979	2.563	-0.5833	7.362	3	3	0.1121	84
																				Row 2:hEPSC +ACLi vs. Row 3:Rset + ACLi	1.979	5.229	-3.25	7.362	3	3	0.6243	84
																				Row 2:hEPSC +ACLi vs. Row 3:hESC +ACL	1.979	3.813	-1.833	7.362	3	3	0.3522	84
																				Row 2:hEPSC +ACLi vs. Row 3:hESC + ACLi	1.979	1.396	0.5833	7.362	3	3	0.1121	84
																				Row 2:hEPSC +ACLi vs. Row 4:hEPSC + ACL	1.979	18.46	-16.48	7.362	3	3	3.166	84
																				Row 2:hEPSC +ACLi vs. Row 4:Rset + ACL	1.979	25.56	-23.58	7.362	3	3	4.53	84
																				Row 2:hEPSC +ACLi vs. Row 4:hEPSC +ACLi	1.979	3.083	-1.104	7.362	3	3	0.2121	84
																				Row 2:hEPSC +ACLi vs. Row 4:Rset + ACLi	1.979	8.625	-6.646	7.362	3	3	1.277	84
																				Row 2:hEPSC +ACLi vs. Row 4:hESC +ACL	1.979	7.5	-5.521	7.362	3	3	1.061	84
																				Row 2:hEPSC +ACLi vs. Row 4:hESC + ACLi	1.979	1.438	0.5417	7.362	3	3	0.1041	84
																				Row 2:hEPSC +ACLi vs. Row 5:hEPSC + ACL	1.979	31.17	-29.19	7.362	3	3	5.607	84
																				Row 2:hEPSC +ACLi vs. Row 5:Rset + ACL	1.979	57.33	-55.35	7.362	3	3	10.63	84
																				Row 2:hEPSC +ACLi vs. Row 5:hEPSC +ACLi	1.979	3.708	-1.729	7.362	3	3	0.3322	84
																				Row 2:hEPSC +ACLi vs. Row 5:Rset + ACLi	1.979	8	-6.021	7.362	3	3	1.157	84
																				Row 2:hEPSC +ACLi vs. Row 5:hESC +ACL	1.979	15.19	-13.21	7.362	3	3	2.537	84
																				Row 2:hEPSC +ACLi vs. Row 5:hESC + ACLi	1.979	1.104	0.875	7.362	3	3	0.1681	84
																				Row 2:hEPSC +ACLi vs. Row 6:hEPSC + ACL	1.979	43.96	-41.98	7.362	3	3	8.064	84
																				Row 2:hEPSC +ACLi vs. Row 6:Rset + ACL	1.979	71.13	-69.15	7.362	3	3	13.28	84
																				Row 2:hEPSC +ACLi vs. Row 6:hEPSC +ACLi	1.979	2.729	-0.75	7.362	3	3	0.1441	84
																				Row 2:hEPSC +ACLi vs. Row 6:Rset + ACLi	1.979	8.375	-6.396	7.362	3	3	1.229	84
																				Row 2:hEPSC +ACLi vs. Row 6:hESC +ACL	1.979	32.77	-30.79	7.362	3	3	5.915	84
																				Row 2:hEPSC +ACLi vs. Row 6:hESC + ACLi	1.979	1.104	0.875	7.362	3	3	0.1681	84
																				Row 2:hEPSC +ACLi vs. Row 7:hEPSC + ACL	1.979	51.21	-49.23	7.362	3	3	9.457	84
																				Row 2:hEPSC +ACLi vs. Row 7:Rset + ACL	1.979	71.08	-69.1	7.362	3	3	13.27	84
																				Row 2:hEPSC +ACLi vs. Row 7:hEPSC +ACLi	1.979	1.146	0.8333	7.362	3	3	0.1601	84
																				Row 2:hEPSC +ACLi vs. Row 7:Rset + ACLi	1.979	6.188	-4.208	7.362	3	3	0.8084	84
																				Row 2:hEPSC +ACLi vs. Row 7:hESC +ACL	1.979	56.1	-54.13	7.362	3	3	10.4	84
																				Row 2:hEPSC +ACLi vs. Row 7:hESC + ACLi	1.979	1.104	0.875	7.362	3	3	0.1681	84
																				Row 2:Rset + ACLi vs. Row 2:hESC +ACL	2.065	1.85	0.215	7.362	3	3	0.0413	84
																				Row 2:Rset + ACLi vs. Row 2:hESC + ACLi	2.065	0.8958	1.169	7.362	3	3	0.2246	84
																				Row 2:Rset + ACLi vs. Row 3:hEPSC + ACL	2.065	9.558	-7.493	7.362	3	3	1.439	84
																				Row 2:Rset + ACLi vs. Row 3:Rset + ACL	2.065	10.79	-8.727	7.362	3	3	1.676	84
																				Row 2:Rset + ACLi vs. Row 3:hEPSC +ACLi	2.065	2.563	-0.4975	7.362	3	3	0.09557	84
																				Row 2:Rset + ACLi vs. Row 3:Rset + ACLi	2.065	5.229	-3.164	7.362	3	3	0.6078	84
																				Row 2:Rset + ACLi vs. Row 3:hESC +ACL	2.065	3.813	-1.748	7.362	3	3	0.3357	84
																				Row 2:Rset + ACLi vs. Row 3:hESC + ACLi	2.065	1.396	0.6692	7.362	3	3	0.1285	84
																				Row 2:Rset + ACLi vs. Row 4:hEPSC + ACL	2.065	18.46	-16.39	7.362	3	3	3.149	84
																				Row 2:Rset + ACLi vs. Row 4:Rset + ACL	2.065	25.56	-23.5	7.362	3	3	4.514	84
																				Row 2:Rset + ACLi vs. Row 4:hEPSC +ACLi	2.065	3.083	-1.018	7.362	3	3	0.1956	84
																				Row 2:Rset + ACLi vs. Row 4:Rset + ACLi	2.065	8.625	-6.56	7.362	3	3	1.26	84
																				Row 2:Rset + ACLi vs. Row 4:hESC +ACL	2.065	7.5	-5.435	7.362	3	3	1.044	84
																				Row 2:Rset + ACLi vs. Row 4:hESC + ACLi	2.065	1.438	0.6275	7.362	3	3	0.1205	84
																				Row 2:Rset + ACLi vs. Row 5:hEPSC + ACL	2.065	31.17	-29.1	7.362	3	3	5.59	84
																				Row 2:Rset + ACLi vs. Row 5:Rset + ACL	2.065	57.33	-55.27	7.362	3	3	10.62	84
																				Row 2:Rset + ACLi vs. Row 5:hEPSC +ACLi	2.065	3.708	-1.643	7.362	3	3	0.3157	84
																				Row 2:Rset + ACLi vs. Row 5:Rset + ACLi	2.065	8	-5.935	7.362	3	3	1.14	84
																				Row 2:Rset + ACLi vs. Row 5:hESC +ACL	2.065	15.19	-13.12	7.362	3	3	2.521	84
																				Row 2:Rset + ACLi vs. Row 5:hESC + ACLi	2.065	1.104	0.9608	7.362	3	3	0.1846	84
																				Row 2:Rset + ACLi vs. Row 6:hEPSC + ACL	2.065	43.96	-41.89	7.362	3	3	8.047	84
																				Row 2:Rset + ACLi vs. Row 6:Rset + ACL	2.065	71.13	-69.06	7.362	3	3	13.27	84
																				Row 2:Rset + ACLi vs. Row 6:hEPSC +ACLi	2.065	2.729	-0.6642	7.362	3	3	0.1276	84
																				Row 2:Rset + ACLi vs. Row 6:Rset + ACLi	2.065	8.375	-6.31	7.362	3	3	1.212	84
																				Row 2:Rset + ACLi vs. Row 6:hESC +ACL	2.065	32.77	-30.71	7.362	3	3	5.898	84
																				Row 2:Rset + ACLi vs. Row 6:hESC + ACLi	2.065	1.104	0.9608	7.362	3	3	0.1846	84
																				Row 2:Rset + ACLi vs. Row 7:hEPSC + ACL	2.065	51.21	-49.14	7.362	3	3	9.44	84
																				Row 2:Rset + ACLi vs. Row 7:Rset + ACL	2.065	71.08	-69.02	7.362	3	3	13.26	84
																				Row 2:Rset + ACLi vs. Row 7:hEPSC +ACLi	2.065	1.146	0.9192	7.362	3	3	0.1766	84
																				Row 2:Rset + ACLi vs. Row 7:Rset + ACLi	2.065	6.188	-4.123	7.362	3	3	0.7919	84
																				Row 2:Rset + ACLi vs. Row 7:hESC +ACL	2.065	56.1	-54.04	7.362	3	3	10.38	84
																				Row 2:Rset + ACLi vs. Row 7:hESC + ACLi	2.065	1.104	0.9608	7.362	3	3	0.1846	84
																				Row 2:hESC +ACL vs. Row 2:hESC + ACLi	1.85	0.8958	0.9542	7.362	3	3	0.1833	84
																				Row 2:hESC +ACL vs. Row 3:hEPSC + ACL	1.85	9.558	-7.708	7.362	3	3	1.481	84
																				Row 2:hESC +ACL vs. Row 3:Rset + ACL	1.85	10.79	-8.942	7.362	3	3	1.718	84
																				Row 2:hESC +ACL vs. Row 3:hEPSC +ACLi	1.85	2.563	-0.7125	7.362	3	3	0.1369	84
																				Row 2:hESC +ACL vs. Row 3:Rset + ACLi	1.85	5.229	-3.379	7.362	3	3	0.6491	84
																				Row 2:hESC +ACL vs. Row 3:hESC +ACL	1.85	3.813	-1.963	7.362	3	3	0.377	84
																				Row 2:hESC +ACL vs. Row 3:hESC + ACLi	1.85	1.396	0.4542	7.362	3	3	0.08724	84
																				Row 2:hESC +ACL vs. Row 4:hEPSC + ACL	1.85	18.46	-16.61	7.362	3	3	3.19	84
																				Row 2:hESC +ACL vs. Row 4:Rset + ACL	1.85	25.56	-23.71	7.362	3	3	4.555	84
																				Row 2:hESC +ACL vs. Row 4:hEPSC +ACLi	1.85	3.083	-1.233	7.362	3	3	0.2369	84
																				Row 2:hESC +ACL vs. Row 4:Rset + ACLi	1.85	8.625	-6.775	7.362	3	3	1.301	84
																				Row 2:hESC +ACL vs. Row 4:hESC +ACL	1.85	7.5	-5.65	7.362	3	3	1.085	84
																				Row 2:hESC +ACL vs. Row 4:hESC + ACLi	1.85	1.438	0.4125	7.362	3	3	0.07924	84
																				Row 2:hESC +ACL vs. Row 5:hEPSC + ACL	1.85	31.17	-29.32	7.362	3	3	5.632	84
																				Row 2:hESC +ACL vs. Row 5:Rset + ACL	1.85	57.33	-55.48	7.362	3	3	10.66	84
																				Row 2:hESC +ACL vs. Row 5:hEPSC +ACLi	1.85	3.708	-1.858	7.362	3	3	0.357	84
																				Row 2:hESC +ACL vs. Row 5:Rset + ACLi	1.85	8	-6.15	7.362	3	3	1.181	84
																				Row 2:hESC +ACL vs. Row 5:hESC +ACL	1.85	15.19	-13.34	7.362	3	3	2.562	84
																				Row 2:hESC +ACL vs. Row 5:hESC + ACLi	1.85	1.104	0.7458	7.362	3	3	0.1433	84
																				Row 2:hESC +ACL vs. Row 6:hEPSC + ACL	1.85	43.96	-42.11	7.362	3	3	8.089	84
																				Row 2:hESC +ACL vs. Row 6:Rset + ACL	1.85	71.13	-69.28	7.362	3	3	13.31	84
																				Row 2:hESC +ACL vs. Row 6:hEPSC +ACLi	1.85	2.729	-0.8792	7.362	3	3	0.1689	84
																				Row 2:hESC +ACL vs. Row 6:Rset + ACLi	1.85	8.375	-6.525	7.362	3	3	1.253	84
																				Row 2:hESC +ACL vs. Row 6:hESC +ACL	1.85	32.77	-30.92	7.362	3	3	5.94	84
																				Row 2:hESC +ACL vs. Row 6:hESC + ACLi	1.85	1.104	0.7458	7.362	3	3	0.1433	84
																				Row 2:hESC +ACL vs. Row 7:hEPSC + ACL	1.85	51.21	-49.36	7.362	3	3	9.481	84
																				Row 2:hESC +ACL vs. Row 7:Rset + ACL	1.85	71.08	-69.23	7.362	3	3	13.3	84
																				Row 2:hESC +ACL vs. Row 7:hEPSC +ACLi	1.85	1.146	0.7042	7.362	3	3	0.1353	84
																				Row 2:hESC +ACL vs. Row 7:Rset + ACLi	1.85	6.188	-4.338	7.362	3	3	0.8332	84
																				Row 2:hESC +ACL vs. Row 7:hESC +ACL	1.85	56.1	-54.25	7.362	3	3	10.42	84
																				Row 2:hESC +ACL vs. Row 7:hESC + ACLi	1.85	1.104	0.7458	7.362	3	3	0.1433	84
																				Row 2:hESC + ACLi vs. Row 3:hEPSC + ACL	0.8958	9.558	-8.663	7.362	3	3	1.664	84
																				Row 2:hESC + ACLi vs. Row 3:Rset + ACL	0.8958	10.79	-9.896	7.362	3	3	1.901	84
																				Row 2:hESC + ACLi vs. Row 3:hEPSC +ACLi	0.8958	2.563	-1.667	7.362	3	3	0.3202	84
																				Row 2:hESC + ACLi vs. Row 3:Rset + ACLi	0.8958	5.229	-4.333	7.362	3	3	0.8324	84
																				Row 2:hESC + ACLi vs. Row 3:hESC +ACL	0.8958	3.813	-2.917	7.362	3	3	0.5603	84
																				Row 2:hESC + ACLi vs. Row 3:hESC + ACLi	0.8958	1.396	-0.5	7.362	3	3	0.09605	84
																				Row 2:hESC + ACLi vs. Row 4:hEPSC + ACL	0.8958	18.46	-17.56	7.362	3	3	3.374	84
																				Row 2:hESC + ACLi vs. Row 4:Rset + ACL	0.8958	25.56	-24.67	7.362	3	3	4.738	84
																				Row 2:hESC + ACLi vs. Row 4:hEPSC +ACLi	0.8958	3.083	-2.188	7.362	3	3	0.4202	84
																				Row 2:hESC + ACLi vs. Row 4:Rset + ACLi	0.8958	8.625	-7.729	7.362	3	3	1.485	84
																				Row 2:hESC + ACLi vs. Row 4:hESC +ACL	0.8958	7.5	-6.604	7.362	3	3	1.269	84
																				Row 2:hESC + ACLi vs. Row 4:hESC + ACLi	0.8958	1.438	-0.5417	7.362	3	3	0.1041	84
																				Row 2:hESC + ACLi vs. Row 5:hEPSC + ACL	0.8958	31.17	-30.27	7.362	3	3	5.815	84
																				Row 2:hESC + ACLi vs. Row 5:Rset + ACL	0.8958	57.33	-56.44	7.362	3	3	10.84	84
																				Row 2:hESC + ACLi vs. Row 5:hEPSC +ACLi	0.8958	3.708	-2.813	7.362	3	3	0.5403	84
																				Row 2:hESC + ACLi vs. Row 5:Rset + ACLi	0.8958	8	-7.104	7.362	3	3	1.365	84
																				Row 2:hESC + ACLi vs. Row 5:hESC +ACL	0.8958	15.19	-14.29	7.362	3	3	2.745	84
																				Row 2:hESC + ACLi vs. Row 5:hESC + ACLi	0.8958	1.104	-0.2083	7.362	3	3	0.04002	84
																				Row 2:hESC + ACLi vs. Row 6:hEPSC + ACL	0.8958	43.96	-43.06	7.362	3	3	8.272	84
																				Row 2:hESC + ACLi vs. Row 6:Rset + ACL	0.8958	71.13	-70.23	7.362	3	3	13.49	84
																				Row 2:hESC + ACLi vs. Row 6:hEPSC +ACLi	0.8958	2.729	-1.833	7.362	3	3	0.3522	84
																				Row 2:hESC + ACLi vs. Row 6:Rset + ACLi	0.8958	8.375	-7.479	7.362	3	3	1.437	84
																				Row 2:hESC + ACLi vs. Row 6:hESC +ACL	0.8958	32.77	-31.88	7.362	3	3	6.123	84
																				Row 2:hESC + ACLi vs. Row 6:hESC + ACLi	0.8958	1.104	-0.2083	7.362	3	3	0.04002	84
																				Row 2:hESC + ACLi vs. Row 7:hEPSC + ACL	0.8958	51.21	-50.31	7.362	3	3	9.665	84
																				Row 2:hESC + ACLi vs. Row 7:Rset + ACL	0.8958	71.08	-70.19	7.362	3	3	13.48	84
																				Row 2:hESC + ACLi vs. Row 7:hEPSC +ACLi	0.8958	1.146	-0.25	7.362	3	3	0.04802	84
																				Row 2:hESC + ACLi vs. Row 7:Rset + ACLi	0.8958	6.188	-5.292	7.362	3	3	1.016	84
																				Row 2:hESC + ACLi vs. Row 7:hESC +ACL	0.8958	56.1	-55.21	7.362	3	3	10.61	84
																				Row 2:hESC + ACLi vs. Row 7:hESC + ACLi	0.8958	1.104	-0.2083	7.362	3	3	0.04002	84
																				Row 3:hEPSC + ACL vs. Row 3:Rset + ACL	9.558	10.79	-1.233	7.362	3	3	0.2369	84
																				Row 3:hEPSC + ACL vs. Row 3:hEPSC +ACLi	9.558	2.563	6.996	7.362	3	3	1.344	84
																				Row 3:hEPSC + ACL vs. Row 3:Rset + ACLi	9.558	5.229	4.329	7.362	3	3	0.8316	84
																				Row 3:hEPSC + ACL vs. Row 3:hESC +ACL	9.558	3.813	5.746	7.362	3	3	1.104	84
																				Row 3:hEPSC + ACL vs. Row 3:hESC + ACLi	9.558	1.396	8.163	7.362	3	3	1.568	84
																				Row 3:hEPSC + ACL vs. Row 4:hEPSC + ACL	9.558	18.46	-8.9	7.362	3	3	1.71	84
																				Row 3:hEPSC + ACL vs. Row 4:Rset + ACL	9.558	25.56	-16	7.362	3	3	3.074	84
																				Row 3:hEPSC + ACL vs. Row 4:hEPSC +ACLi	9.558	3.083	6.475	7.362	3	3	1.244	84
																				Row 3:hEPSC + ACL vs. Row 4:Rset + ACLi	9.558	8.625	0.9333	7.362	3	3	0.1793	84
																				Row 3:hEPSC + ACL vs. Row 4:hESC +ACL	9.558	7.5	2.058	7.362	3	3	0.3954	84
																				Row 3:hEPSC + ACL vs. Row 4:hESC + ACLi	9.558	1.438	8.121	7.362	3	3	1.56	84
																				Row 3:hEPSC + ACL vs. Row 5:hEPSC + ACL	9.558	31.17	-21.61	7.362	3	3	4.151	84
																				Row 3:hEPSC + ACL vs. Row 5:Rset + ACL	9.558	57.33	-47.78	7.362	3	3	9.177	84
																				Row 3:hEPSC + ACL vs. Row 5:hEPSC +ACLi	9.558	3.708	5.85	7.362	3	3	1.124	84
																				Row 3:hEPSC + ACL vs. Row 5:Rset + ACLi	9.558	8	1.558	7.362	3	3	0.2993	84
																				Row 3:hEPSC + ACL vs. Row 5:hESC +ACL	9.558	15.19	-5.629	7.362	3	3	1.081	84
																				Row 3:hEPSC + ACL vs. Row 5:hESC + ACLi	9.558	1.104	8.454	7.362	3	3	1.624	84
																				Row 3:hEPSC + ACL vs. Row 6:hEPSC + ACL	9.558	43.96	-34.4	7.362	3	3	6.608	84
																				Row 3:hEPSC + ACL vs. Row 6:Rset + ACL	9.558	71.13	-61.57	7.362	3	3	11.83	84
																				Row 3:hEPSC + ACL vs. Row 6:hEPSC +ACLi	9.558	2.729	6.829	7.362	3	3	1.312	84
																				Row 3:hEPSC + ACL vs. Row 6:Rset + ACLi	9.558	8.375	1.183	7.362	3	3	0.2273	84
																				Row 3:hEPSC + ACL vs. Row 6:hESC +ACL	9.558	32.77	-23.21	7.362	3	3	4.459	84
																				Row 3:hEPSC + ACL vs. Row 6:hESC + ACLi	9.558	1.104	8.454	7.362	3	3	1.624	84
																				Row 3:hEPSC + ACL vs. Row 7:hEPSC + ACL	9.558	51.21	-41.65	7.362	3	3	8.001	84
																				Row 3:hEPSC + ACL vs. Row 7:Rset + ACL	9.558	71.08	-61.53	7.362	3	3	11.82	84
																				Row 3:hEPSC + ACL vs. Row 7:hEPSC +ACLi	9.558	1.146	8.413	7.362	3	3	1.616	84
																				Row 3:hEPSC + ACL vs. Row 7:Rset + ACLi	9.558	6.188	3.371	7.362	3	3	0.6475	84
																				Row 3:hEPSC + ACL vs. Row 7:hESC +ACL	9.558	56.1	-46.55	7.362	3	3	8.941	84
																				Row 3:hEPSC + ACL vs. Row 7:hESC + ACLi	9.558	1.104	8.454	7.362	3	3	1.624	84
																				Row 3:Rset + ACL vs. Row 3:hEPSC +ACLi	10.79	2.563	8.229	7.362	3	3	1.581	84
																				Row 3:Rset + ACL vs. Row 3:Rset + ACLi	10.79	5.229	5.563	7.362	3	3	1.069	84
																				Row 3:Rset + ACL vs. Row 3:hESC +ACL	10.79	3.813	6.979	7.362	3	3	1.341	84
																				Row 3:Rset + ACL vs. Row 3:hESC + ACLi	10.79	1.396	9.396	7.362	3	3	1.805	84
																				Row 3:Rset + ACL vs. Row 4:hEPSC + ACL	10.79	18.46	-7.667	7.362	3	3	1.473	84
																				Row 3:Rset + ACL vs. Row 4:Rset + ACL	10.79	25.56	-14.77	7.362	3	3	2.837	84
																				Row 3:Rset + ACL vs. Row 4:hEPSC +ACLi	10.79	3.083	7.708	7.362	3	3	1.481	84
																				Row 3:Rset + ACL vs. Row 4:Rset + ACLi	10.79	8.625	2.167	7.362	3	3	0.4162	84
																				Row 3:Rset + ACL vs. Row 4:hESC +ACL	10.79	7.5	3.292	7.362	3	3	0.6323	84
																				Row 3:Rset + ACL vs. Row 4:hESC + ACLi	10.79	1.438	9.354	7.362	3	3	1.797	84
																				Row 3:Rset + ACL vs. Row 5:hEPSC + ACL	10.79	31.17	-20.38	7.362	3	3	3.914	84
																				Row 3:Rset + ACL vs. Row 5:Rset + ACL	10.79	57.33	-46.54	7.362	3	3	8.94	84
																				Row 3:Rset + ACL vs. Row 5:hEPSC +ACLi	10.79	3.708	7.083	7.362	3	3	1.361	84
																				Row 3:Rset + ACL vs. Row 5:Rset + ACLi	10.79	8	2.792	7.362	3	3	0.5363	84
																				Row 3:Rset + ACL vs. Row 5:hESC +ACL	10.79	15.19	-4.396	7.362	3	3	0.8444	84
																				Row 3:Rset + ACL vs. Row 5:hESC + ACLi	10.79	1.104	9.688	7.362	3	3	1.861	84
																				Row 3:Rset + ACL vs. Row 6:hEPSC + ACL	10.79	43.96	-33.17	7.362	3	3	6.371	84
																				Row 3:Rset + ACL vs. Row 6:Rset + ACL	10.79	71.13	-60.33	7.362	3	3	11.59	84
																				Row 3:Rset + ACL vs. Row 6:hEPSC +ACLi	10.79	2.729	8.063	7.362	3	3	1.549	84
																				Row 3:Rset + ACL vs. Row 6:Rset + ACLi	10.79	8.375	2.417	7.362	3	3	0.4642	84
																				Row 3:Rset + ACL vs. Row 6:hESC +ACL	10.79	32.77	-21.98	7.362	3	3	4.222	84
																				Row 3:Rset + ACL vs. Row 6:hESC + ACLi	10.79	1.104	9.688	7.362	3	3	1.861	84
																				Row 3:Rset + ACL vs. Row 7:hEPSC + ACL	10.79	51.21	-40.42	7.362	3	3	7.764	84
																				Row 3:Rset + ACL vs. Row 7:Rset + ACL	10.79	71.08	-60.29	7.362	3	3	11.58	84
																				Row 3:Rset + ACL vs. Row 7:hEPSC +ACLi	10.79	1.146	9.646	7.362	3	3	1.853	84
																				Row 3:Rset + ACL vs. Row 7:Rset + ACLi	10.79	6.188	4.604	7.362	3	3	0.8844	84
																				Row 3:Rset + ACL vs. Row 7:hESC +ACL	10.79	56.1	-45.31	7.362	3	3	8.704	84
																				Row 3:Rset + ACL vs. Row 7:hESC + ACLi	10.79	1.104	9.688	7.362	3	3	1.861	84
																				Row 3:hEPSC +ACLi vs. Row 3:Rset + ACLi	2.563	5.229	-2.667	7.362	3	3	0.5122	84
																				Row 3:hEPSC +ACLi vs. Row 3:hESC +ACL	2.563	3.813	-1.25	7.362	3	3	0.2401	84
																				Row 3:hEPSC +ACLi vs. Row 3:hESC + ACLi	2.563	1.396	1.167	7.362	3	3	0.2241	84
																				Row 3:hEPSC +ACLi vs. Row 4:hEPSC + ACL	2.563	18.46	-15.9	7.362	3	3	3.053	84
																				Row 3:hEPSC +ACLi vs. Row 4:Rset + ACL	2.563	25.56	-23	7.362	3	3	4.418	84
																				Row 3:hEPSC +ACLi vs. Row 4:hEPSC +ACLi	2.563	3.083	-0.5208	7.362	3	3	0.1	84
																				Row 3:hEPSC +ACLi vs. Row 4:Rset + ACLi	2.563	8.625	-6.063	7.362	3	3	1.165	84
																				Row 3:hEPSC +ACLi vs. Row 4:hESC +ACL	2.563	7.5	-4.938	7.362	3	3	0.9485	84
																				Row 3:hEPSC +ACLi vs. Row 4:hESC + ACLi	2.563	1.438	1.125	7.362	3	3	0.2161	84
																				Row 3:hEPSC +ACLi vs. Row 5:hEPSC + ACL	2.563	31.17	-28.6	7.362	3	3	5.495	84
																				Row 3:hEPSC +ACLi vs. Row 5:Rset + ACL	2.563	57.33	-54.77	7.362	3	3	10.52	84
																				Row 3:hEPSC +ACLi vs. Row 5:hEPSC +ACLi	2.563	3.708	-1.146	7.362	3	3	0.2201	84
																				Row 3:hEPSC +ACLi vs. Row 5:Rset + ACLi	2.563	8	-5.438	7.362	3	3	1.045	84
																				Row 3:hEPSC +ACLi vs. Row 5:hESC +ACL	2.563	15.19	-12.63	7.362	3	3	2.425	84
																				Row 3:hEPSC +ACLi vs. Row 5:hESC + ACLi	2.563	1.104	1.458	7.362	3	3	0.2801	84
																				Row 3:hEPSC +ACLi vs. Row 6:hEPSC + ACL	2.563	43.96	-41.4	7.362	3	3	7.952	84
																				Row 3:hEPSC +ACLi vs. Row 6:Rset + ACL	2.563	71.13	-68.56	7.362	3	3	13.17	84
																				Row 3:hEPSC +ACLi vs. Row 6:hEPSC +ACLi	2.563	2.729	-0.1667	7.362	3	3	0.03202	84
																				Row 3:hEPSC +ACLi vs. Row 6:Rset + ACLi	2.563	8.375	-5.813	7.362	3	3	1.117	84
																				Row 3:hEPSC +ACLi vs. Row 6:hESC +ACL	2.563	32.77	-30.21	7.362	3	3	5.803	84
																				Row 3:hEPSC +ACLi vs. Row 6:hESC + ACLi	2.563	1.104	1.458	7.362	3	3	0.2801	84
																				Row 3:hEPSC +ACLi vs. Row 7:hEPSC + ACL	2.563	51.21	-48.65	7.362	3	3	9.345	84
																				Row 3:hEPSC +ACLi vs. Row 7:Rset + ACL	2.563	71.08	-68.52	7.362	3	3	13.16	84
																				Row 3:hEPSC +ACLi vs. Row 7:hEPSC +ACLi	2.563	1.146	1.417	7.362	3	3	0.2721	84
																				Row 3:hEPSC +ACLi vs. Row 7:Rset + ACLi	2.563	6.188	-3.625	7.362	3	3	0.6963	84
																				Row 3:hEPSC +ACLi vs. Row 7:hESC +ACL	2.563	56.1	-53.54	7.362	3	3	10.28	84
																				Row 3:hEPSC +ACLi vs. Row 7:hESC + ACLi	2.563	1.104	1.458	7.362	3	3	0.2801	84
																				Row 3:Rset + ACLi vs. Row 3:hESC +ACL	5.229	3.813	1.417	7.362	3	3	0.2721	84
																				Row 3:Rset + ACLi vs. Row 3:hESC + ACLi	5.229	1.396	3.833	7.362	3	3	0.7364	84
																				Row 3:Rset + ACLi vs. Row 4:hEPSC + ACL	5.229	18.46	-13.23	7.362	3	3	2.541	84
																				Row 3:Rset + ACLi vs. Row 4:Rset + ACL	5.229	25.56	-20.33	7.362	3	3	3.906	84
																				Row 3:Rset + ACLi vs. Row 4:hEPSC +ACLi	5.229	3.083	2.146	7.362	3	3	0.4122	84
																				Row 3:Rset + ACLi vs. Row 4:Rset + ACLi	5.229	8.625	-3.396	7.362	3	3	0.6523	84
																				Row 3:Rset + ACLi vs. Row 4:hESC +ACL	5.229	7.5	-2.271	7.362	3	3	0.4362	84
																				Row 3:Rset + ACLi vs. Row 4:hESC + ACLi	5.229	1.438	3.792	7.362	3	3	0.7284	84
																				Row 3:Rset + ACLi vs. Row 5:hEPSC + ACL	5.229	31.17	-25.94	7.362	3	3	4.982	84
																				Row 3:Rset + ACLi vs. Row 5:Rset + ACL	5.229	57.33	-52.1	7.362	3	3	10.01	84
																				Row 3:Rset + ACLi vs. Row 5:hEPSC +ACLi	5.229	3.708	1.521	7.362	3	3	0.2921	84
																				Row 3:Rset + ACLi vs. Row 5:Rset + ACLi	5.229	8	-2.771	7.362	3	3	0.5323	84
																				Row 3:Rset + ACLi vs. Row 5:hESC +ACL	5.229	15.19	-9.958	7.362	3	3	1.913	84
																				Row 3:Rset + ACLi vs. Row 5:hESC + ACLi	5.229	1.104	4.125	7.362	3	3	0.7924	84
																				Row 3:Rset + ACLi vs. Row 6:hEPSC + ACL	5.229	43.96	-38.73	7.362	3	3	7.44	84
																				Row 3:Rset + ACLi vs. Row 6:Rset + ACL	5.229	71.13	-65.9	7.362	3	3	12.66	84
																				Row 3:Rset + ACLi vs. Row 6:hEPSC +ACLi	5.229	2.729	2.5	7.362	3	3	0.4802	84
																				Row 3:Rset + ACLi vs. Row 6:Rset + ACLi	5.229	8.375	-3.146	7.362	3	3	0.6043	84
																				Row 3:Rset + ACLi vs. Row 6:hESC +ACL	5.229	32.77	-27.54	7.362	3	3	5.291	84
																				Row 3:Rset + ACLi vs. Row 6:hESC + ACLi	5.229	1.104	4.125	7.362	3	3	0.7924	84
																				Row 3:Rset + ACLi vs. Row 7:hEPSC + ACL	5.229	51.21	-45.98	7.362	3	3	8.832	84
																				Row 3:Rset + ACLi vs. Row 7:Rset + ACL	5.229	71.08	-65.85	7.362	3	3	12.65	84
																				Row 3:Rset + ACLi vs. Row 7:hEPSC +ACLi	5.229	1.146	4.083	7.362	3	3	0.7844	84
																				Row 3:Rset + ACLi vs. Row 7:Rset + ACLi	5.229	6.188	-0.9583	7.362	3	3	0.1841	84
																				Row 3:Rset + ACLi vs. Row 7:hESC +ACL	5.229	56.1	-50.88	7.362	3	3	9.773	84
																				Row 3:Rset + ACLi vs. Row 7:hESC + ACLi	5.229	1.104	4.125	7.362	3	3	0.7924	84
																				Row 3:hESC +ACL vs. Row 3:hESC + ACLi	3.813	1.396	2.417	7.362	3	3	0.4642	84
																				Row 3:hESC +ACL vs. Row 4:hEPSC + ACL	3.813	18.46	-14.65	7.362	3	3	2.813	84
																				Row 3:hESC +ACL vs. Row 4:Rset + ACL	3.813	25.56	-21.75	7.362	3	3	4.178	84
																				Row 3:hESC +ACL vs. Row 4:hEPSC +ACLi	3.813	3.083	0.7292	7.362	3	3	0.1401	84
																				Row 3:hESC +ACL vs. Row 4:Rset + ACLi	3.813	8.625	-4.813	7.362	3	3	0.9244	84
																				Row 3:hESC +ACL vs. Row 4:hESC +ACL	3.813	7.5	-3.688	7.362	3	3	0.7083	84
																				Row 3:hESC +ACL vs. Row 4:hESC + ACLi	3.813	1.438	2.375	7.362	3	3	0.4562	84
																				Row 3:hESC +ACL vs. Row 5:hEPSC + ACL	3.813	31.17	-27.35	7.362	3	3	5.255	84
																				Row 3:hESC +ACL vs. Row 5:Rset + ACL	3.813	57.33	-53.52	7.362	3	3	10.28	84
																				Row 3:hESC +ACL vs. Row 5:hEPSC +ACLi	3.813	3.708	0.1042	7.362	3	3	0.02001	84
																				Row 3:hESC +ACL vs. Row 5:Rset + ACLi	3.813	8	-4.188	7.362	3	3	0.8044	84
																				Row 3:hESC +ACL vs. Row 5:hESC +ACL	3.813	15.19	-11.38	7.362	3	3	2.185	84
																				Row 3:hESC +ACL vs. Row 5:hESC + ACLi	3.813	1.104	2.708	7.362	3	3	0.5203	84
																				Row 3:hESC +ACL vs. Row 6:hEPSC + ACL	3.813	43.96	-40.15	7.362	3	3	7.712	84
																				Row 3:hESC +ACL vs. Row 6:Rset + ACL	3.813	71.13	-67.31	7.362	3	3	12.93	84
																				Row 3:hESC +ACL vs. Row 6:hEPSC +ACLi	3.813	2.729	1.083	7.362	3	3	0.2081	84
																				Row 3:hESC +ACL vs. Row 6:Rset + ACLi	3.813	8.375	-4.563	7.362	3	3	0.8764	84
																				Row 3:hESC +ACL vs. Row 6:hESC +ACL	3.813	32.77	-28.96	7.362	3	3	5.563	84
																				Row 3:hESC +ACL vs. Row 6:hESC + ACLi	3.813	1.104	2.708	7.362	3	3	0.5203	84
																				Row 3:hESC +ACL vs. Row 7:hEPSC + ACL	3.813	51.21	-47.4	7.362	3	3	9.104	84
																				Row 3:hESC +ACL vs. Row 7:Rset + ACL	3.813	71.08	-67.27	7.362	3	3	12.92	84
																				Row 3:hESC +ACL vs. Row 7:hEPSC +ACLi	3.813	1.146	2.667	7.362	3	3	0.5122	84
																				Row 3:hESC +ACL vs. Row 7:Rset + ACLi	3.813	6.188	-2.375	7.362	3	3	0.4562	84
																				Row 3:hESC +ACL vs. Row 7:hESC +ACL	3.813	56.1	-52.29	7.362	3	3	10.04	84
																				Row 3:hESC +ACL vs. Row 7:hESC + ACLi	3.813	1.104	2.708	7.362	3	3	0.5203	84
																				Row 3:hESC + ACLi vs. Row 4:hEPSC + ACL	1.396	18.46	-17.06	7.362	3	3	3.278	84
																				Row 3:hESC + ACLi vs. Row 4:Rset + ACL	1.396	25.56	-24.17	7.362	3	3	4.642	84
																				Row 3:hESC + ACLi vs. Row 4:hEPSC +ACLi	1.396	3.083	-1.688	7.362	3	3	0.3242	84
																				Row 3:hESC + ACLi vs. Row 4:Rset + ACLi	1.396	8.625	-7.229	7.362	3	3	1.389	84
																				Row 3:hESC + ACLi vs. Row 4:hESC +ACL	1.396	7.5	-6.104	7.362	3	3	1.173	84
																				Row 3:hESC + ACLi vs. Row 4:hESC + ACLi	1.396	1.438	-0.04167	7.362	3	3	0.008004	84
																				Row 3:hESC + ACLi vs. Row 5:hEPSC + ACL	1.396	31.17	-29.77	7.362	3	3	5.719	84
																				Row 3:hESC + ACLi vs. Row 5:Rset + ACL	1.396	57.33	-55.94	7.362	3	3	10.75	84
																				Row 3:hESC + ACLi vs. Row 5:hEPSC +ACLi	1.396	3.708	-2.313	7.362	3	3	0.4442	84
																				Row 3:hESC + ACLi vs. Row 5:Rset + ACLi	1.396	8	-6.604	7.362	3	3	1.269	84
																				Row 3:hESC + ACLi vs. Row 5:hESC +ACL	1.396	15.19	-13.79	7.362	3	3	2.649	84
																				Row 3:hESC + ACLi vs. Row 5:hESC + ACLi	1.396	1.104	0.2917	7.362	3	3	0.05603	84
																				Row 3:hESC + ACLi vs. Row 6:hEPSC + ACL	1.396	43.96	-42.56	7.362	3	3	8.176	84
																				Row 3:hESC + ACLi vs. Row 6:Rset + ACL	1.396	71.13	-69.73	7.362	3	3	13.39	84
																				Row 3:hESC + ACLi vs. Row 6:hEPSC +ACLi	1.396	2.729	-1.333	7.362	3	3	0.2561	84
																				Row 3:hESC + ACLi vs. Row 6:Rset + ACLi	1.396	8.375	-6.979	7.362	3	3	1.341	84
																				Row 3:hESC + ACLi vs. Row 6:hESC +ACL	1.396	32.77	-31.38	7.362	3	3	6.027	84
																				Row 3:hESC + ACLi vs. Row 6:hESC + ACLi	1.396	1.104	0.2917	7.362	3	3	0.05603	84
																				Row 3:hESC + ACLi vs. Row 7:hEPSC + ACL	1.396	51.21	-49.81	7.362	3	3	9.569	84
																				Row 3:hESC + ACLi vs. Row 7:Rset + ACL	1.396	71.08	-69.69	7.362	3	3	13.39	84
																				Row 3:hESC + ACLi vs. Row 7:hEPSC +ACLi	1.396	1.146	0.25	7.362	3	3	0.04802	84
																				Row 3:hESC + ACLi vs. Row 7:Rset + ACLi	1.396	6.188	-4.792	7.362	3	3	0.9204	84
																				Row 3:hESC + ACLi vs. Row 7:hESC +ACL	1.396	56.1	-54.71	7.362	3	3	10.51	84
																				Row 3:hESC + ACLi vs. Row 7:hESC + ACLi	1.396	1.104	0.2917	7.362	3	3	0.05603	84
																				Row 4:hEPSC + ACL vs. Row 4:Rset + ACL	18.46	25.56	-7.104	7.362	3	3	1.365	84
																				Row 4:hEPSC + ACL vs. Row 4:hEPSC +ACLi	18.46	3.083	15.38	7.362	3	3	2.953	84
																				Row 4:hEPSC + ACL vs. Row 4:Rset + ACLi	18.46	8.625	9.833	7.362	3	3	1.889	84
																				Row 4:hEPSC + ACL vs. Row 4:hESC +ACL	18.46	7.5	10.96	7.362	3	3	2.105	84
																				Row 4:hEPSC + ACL vs. Row 4:hESC + ACLi	18.46	1.438	17.02	7.362	3	3	3.27	84
																				Row 4:hEPSC + ACL vs. Row 5:hEPSC + ACL	18.46	31.17	-12.71	7.362	3	3	2.441	84
																				Row 4:hEPSC + ACL vs. Row 5:Rset + ACL	18.46	57.33	-38.88	7.362	3	3	7.468	84
																				Row 4:hEPSC + ACL vs. Row 5:hEPSC +ACLi	18.46	3.708	14.75	7.362	3	3	2.833	84
																				Row 4:hEPSC + ACL vs. Row 5:Rset + ACLi	18.46	8	10.46	7.362	3	3	2.009	84
																				Row 4:hEPSC + ACL vs. Row 5:hESC +ACL	18.46	15.19	3.271	7.362	3	3	0.6283	84
																				Row 4:hEPSC + ACL vs. Row 5:hESC + ACLi	18.46	1.104	17.35	7.362	3	3	3.334	84
																				Row 4:hEPSC + ACL vs. Row 6:hEPSC + ACL	18.46	43.96	-25.5	7.362	3	3	4.898	84
																				Row 4:hEPSC + ACL vs. Row 6:Rset + ACL	18.46	71.13	-52.67	7.362	3	3	10.12	84
																				Row 4:hEPSC + ACL vs. Row 6:hEPSC +ACLi	18.46	2.729	15.73	7.362	3	3	3.021	84
																				Row 4:hEPSC + ACL vs. Row 6:Rset + ACLi	18.46	8.375	10.08	7.362	3	3	1.937	84
																				Row 4:hEPSC + ACL vs. Row 6:hESC +ACL	18.46	32.77	-14.31	7.362	3	3	2.749	84
																				Row 4:hEPSC + ACL vs. Row 6:hESC + ACLi	18.46	1.104	17.35	7.362	3	3	3.334	84
																				Row 4:hEPSC + ACL vs. Row 7:hEPSC + ACL	18.46	51.21	-32.75	7.362	3	3	6.291	84
																				Row 4:hEPSC + ACL vs. Row 7:Rset + ACL	18.46	71.08	-52.63	7.362	3	3	10.11	84
																				Row 4:hEPSC + ACL vs. Row 7:hEPSC +ACLi	18.46	1.146	17.31	7.362	3	3	3.326	84
																				Row 4:hEPSC + ACL vs. Row 7:Rset + ACLi	18.46	6.188	12.27	7.362	3	3	2.357	84
																				Row 4:hEPSC + ACL vs. Row 7:hESC +ACL	18.46	56.1	-37.65	7.362	3	3	7.232	84
																				Row 4:hEPSC + ACL vs. Row 7:hESC + ACLi	18.46	1.104	17.35	7.362	3	3	3.334	84
																				Row 4:Rset + ACL vs. Row 4:hEPSC +ACLi	25.56	3.083	22.48	7.362	3	3	4.318	84
																				Row 4:Rset + ACL vs. Row 4:Rset + ACLi	25.56	8.625	16.94	7.362	3	3	3.254	84
																				Row 4:Rset + ACL vs. Row 4:hESC +ACL	25.56	7.5	18.06	7.362	3	3	3.47	84
																				Row 4:Rset + ACL vs. Row 4:hESC + ACLi	25.56	1.438	24.13	7.362	3	3	4.634	84
																				Row 4:Rset + ACL vs. Row 5:hEPSC + ACL	25.56	31.17	-5.604	7.362	3	3	1.077	84
																				Row 4:Rset + ACL vs. Row 5:Rset + ACL	25.56	57.33	-31.77	7.362	3	3	6.103	84
																				Row 4:Rset + ACL vs. Row 5:hEPSC +ACLi	25.56	3.708	21.85	7.362	3	3	4.198	84
																				Row 4:Rset + ACL vs. Row 5:Rset + ACLi	25.56	8	17.56	7.362	3	3	3.374	84
																				Row 4:Rset + ACL vs. Row 5:hESC +ACL	25.56	15.19	10.38	7.362	3	3	1.993	84
																				Row 4:Rset + ACL vs. Row 5:hESC + ACLi	25.56	1.104	24.46	7.362	3	3	4.698	84
																				Row 4:Rset + ACL vs. Row 6:hEPSC + ACL	25.56	43.96	-18.4	7.362	3	3	3.534	84
																				Row 4:Rset + ACL vs. Row 6:Rset + ACL	25.56	71.13	-45.56	7.362	3	3	8.752	84
																				Row 4:Rset + ACL vs. Row 6:hEPSC +ACLi	25.56	2.729	22.83	7.362	3	3	4.386	84
																				Row 4:Rset + ACL vs. Row 6:Rset + ACLi	25.56	8.375	17.19	7.362	3	3	3.302	84
																				Row 4:Rset + ACL vs. Row 6:hESC +ACL	25.56	32.77	-7.208	7.362	3	3	1.385	84
																				Row 4:Rset + ACL vs. Row 6:hESC + ACLi	25.56	1.104	24.46	7.362	3	3	4.698	84
																				Row 4:Rset + ACL vs. Row 7:hEPSC + ACL	25.56	51.21	-25.65	7.362	3	3	4.926	84
																				Row 4:Rset + ACL vs. Row 7:Rset + ACL	25.56	71.08	-45.52	7.362	3	3	8.744	84
																				Row 4:Rset + ACL vs. Row 7:hEPSC +ACLi	25.56	1.146	24.42	7.362	3	3	4.69	84
																				Row 4:Rset + ACL vs. Row 7:Rset + ACLi	25.56	6.188	19.38	7.362	3	3	3.722	84
																				Row 4:Rset + ACL vs. Row 7:hESC +ACL	25.56	56.1	-30.54	7.362	3	3	5.867	84
																				Row 4:Rset + ACL vs. Row 7:hESC + ACLi	25.56	1.104	24.46	7.362	3	3	4.698	84
																				Row 4:hEPSC +ACLi vs. Row 4:Rset + ACLi	3.083	8.625	-5.542	7.362	3	3	1.065	84
																				Row 4:hEPSC +ACLi vs. Row 4:hESC +ACL	3.083	7.5	-4.417	7.362	3	3	0.8484	84
																				Row 4:hEPSC +ACLi vs. Row 4:hESC + ACLi	3.083	1.438	1.646	7.362	3	3	0.3162	84
																				Row 4:hEPSC +ACLi vs. Row 5:hEPSC + ACL	3.083	31.17	-28.08	7.362	3	3	5.395	84
																				Row 4:hEPSC +ACLi vs. Row 5:Rset + ACL	3.083	57.33	-54.25	7.362	3	3	10.42	84
																				Row 4:hEPSC +ACLi vs. Row 5:hEPSC +ACLi	3.083	3.708	-0.625	7.362	3	3	0.1201	84
																				Row 4:hEPSC +ACLi vs. Row 5:Rset + ACLi	3.083	8	-4.917	7.362	3	3	0.9445	84
																				Row 4:hEPSC +ACLi vs. Row 5:hESC +ACL	3.083	15.19	-12.1	7.362	3	3	2.325	84
																				Row 4:hEPSC +ACLi vs. Row 5:hESC + ACLi	3.083	1.104	1.979	7.362	3	3	0.3802	84
																				Row 4:hEPSC +ACLi vs. Row 6:hEPSC + ACL	3.083	43.96	-40.88	7.362	3	3	7.852	84
																				Row 4:hEPSC +ACLi vs. Row 6:Rset + ACL	3.083	71.13	-68.04	7.362	3	3	13.07	84
																				Row 4:hEPSC +ACLi vs. Row 6:hEPSC +ACLi	3.083	2.729	0.3542	7.362	3	3	0.06803	84
																				Row 4:hEPSC +ACLi vs. Row 6:Rset + ACLi	3.083	8.375	-5.292	7.362	3	3	1.016	84
																				Row 4:hEPSC +ACLi vs. Row 6:hESC +ACL	3.083	32.77	-29.69	7.362	3	3	5.703	84
																				Row 4:hEPSC +ACLi vs. Row 6:hESC + ACLi	3.083	1.104	1.979	7.362	3	3	0.3802	84
																				Row 4:hEPSC +ACLi vs. Row 7:hEPSC + ACL	3.083	51.21	-48.13	7.362	3	3	9.244	84
																				Row 4:hEPSC +ACLi vs. Row 7:Rset + ACL	3.083	71.08	-68	7.362	3	3	13.06	84
																				Row 4:hEPSC +ACLi vs. Row 7:hEPSC +ACLi	3.083	1.146	1.938	7.362	3	3	0.3722	84
																				Row 4:hEPSC +ACLi vs. Row 7:Rset + ACLi	3.083	6.188	-3.104	7.362	3	3	0.5963	84
																				Row 4:hEPSC +ACLi vs. Row 7:hESC +ACL	3.083	56.1	-53.02	7.362	3	3	10.18	84
																				Row 4:hEPSC +ACLi vs. Row 7:hESC + ACLi	3.083	1.104	1.979	7.362	3	3	0.3802	84
																				Row 4:Rset + ACLi vs. Row 4:hESC +ACL	8.625	7.5	1.125	7.362	3	3	0.2161	84
																				Row 4:Rset + ACLi vs. Row 4:hESC + ACLi	8.625	1.438	7.188	7.362	3	3	1.381	84
																				Row 4:Rset + ACLi vs. Row 5:hEPSC + ACL	8.625	31.17	-22.54	7.362	3	3	4.33	84
																				Row 4:Rset + ACLi vs. Row 5:Rset + ACL	8.625	57.33	-48.71	7.362	3	3	9.357	84
																				Row 4:Rset + ACLi vs. Row 5:hEPSC +ACLi	8.625	3.708	4.917	7.362	3	3	0.9445	84
																				Row 4:Rset + ACLi vs. Row 5:Rset + ACLi	8.625	8	0.625	7.362	3	3	0.1201	84
																				Row 4:Rset + ACLi vs. Row 5:hESC +ACL	8.625	15.19	-6.563	7.362	3	3	1.261	84
																				Row 4:Rset + ACLi vs. Row 5:hESC + ACLi	8.625	1.104	7.521	7.362	3	3	1.445	84
																				Row 4:Rset + ACLi vs. Row 6:hEPSC + ACL	8.625	43.96	-35.33	7.362	3	3	6.787	84
																				Row 4:Rset + ACLi vs. Row 6:Rset + ACL	8.625	71.13	-62.5	7.362	3	3	12.01	84
																				Row 4:Rset + ACLi vs. Row 6:hEPSC +ACLi	8.625	2.729	5.896	7.362	3	3	1.133	84
																				Row 4:Rset + ACLi vs. Row 6:Rset + ACLi	8.625	8.375	0.25	7.362	3	3	0.04802	84
																				Row 4:Rset + ACLi vs. Row 6:hESC +ACL	8.625	32.77	-24.15	7.362	3	3	4.638	84
																				Row 4:Rset + ACLi vs. Row 6:hESC + ACLi	8.625	1.104	7.521	7.362	3	3	1.445	84
																				Row 4:Rset + ACLi vs. Row 7:hEPSC + ACL	8.625	51.21	-42.58	7.362	3	3	8.18	84
																				Row 4:Rset + ACLi vs. Row 7:Rset + ACL	8.625	71.08	-62.46	7.362	3	3	12	84
																				Row 4:Rset + ACLi vs. Row 7:hEPSC +ACLi	8.625	1.146	7.479	7.362	3	3	1.437	84
																				Row 4:Rset + ACLi vs. Row 7:Rset + ACLi	8.625	6.188	2.438	7.362	3	3	0.4682	84
																				Row 4:Rset + ACLi vs. Row 7:hESC +ACL	8.625	56.1	-47.48	7.362	3	3	9.12	84
																				Row 4:Rset + ACLi vs. Row 7:hESC + ACLi	8.625	1.104	7.521	7.362	3	3	1.445	84
																				Row 4:hESC +ACL vs. Row 4:hESC + ACLi	7.5	1.438	6.063	7.362	3	3	1.165	84
																				Row 4:hESC +ACL vs. Row 5:hEPSC + ACL	7.5	31.17	-23.67	7.362	3	3	4.546	84
																				Row 4:hESC +ACL vs. Row 5:Rset + ACL	7.5	57.33	-49.83	7.362	3	3	9.573	84
																				Row 4:hESC +ACL vs. Row 5:hEPSC +ACLi	7.5	3.708	3.792	7.362	3	3	0.7284	84
																				Row 4:hESC +ACL vs. Row 5:Rset + ACLi	7.5	8	-0.5	7.362	3	3	0.09605	84
																				Row 4:hESC +ACL vs. Row 5:hESC +ACL	7.5	15.19	-7.688	7.362	3	3	1.477	84
																				Row 4:hESC +ACL vs. Row 5:hESC + ACLi	7.5	1.104	6.396	7.362	3	3	1.229	84
																				Row 4:hESC +ACL vs. Row 6:hEPSC + ACL	7.5	43.96	-36.46	7.362	3	3	7.003	84
																				Row 4:hESC +ACL vs. Row 6:Rset + ACL	7.5	71.13	-63.63	7.362	3	3	12.22	84
																				Row 4:hESC +ACL vs. Row 6:hEPSC +ACLi	7.5	2.729	4.771	7.362	3	3	0.9164	84
																				Row 4:hESC +ACL vs. Row 6:Rset + ACLi	7.5	8.375	-0.875	7.362	3	3	0.1681	84
																				Row 4:hESC +ACL vs. Row 6:hESC +ACL	7.5	32.77	-25.27	7.362	3	3	4.854	84
																				Row 4:hESC +ACL vs. Row 6:hESC + ACLi	7.5	1.104	6.396	7.362	3	3	1.229	84
																				Row 4:hESC +ACL vs. Row 7:hEPSC + ACL	7.5	51.21	-43.71	7.362	3	3	8.396	84
																				Row 4:hESC +ACL vs. Row 7:Rset + ACL	7.5	71.08	-63.58	7.362	3	3	12.21	84
																				Row 4:hESC +ACL vs. Row 7:hEPSC +ACLi	7.5	1.146	6.354	7.362	3	3	1.221	84
																				Row 4:hESC +ACL vs. Row 7:Rset + ACLi	7.5	6.188	1.313	7.362	3	3	0.2521	84
																				Row 4:hESC +ACL vs. Row 7:hESC +ACL	7.5	56.1	-48.6	7.362	3	3	9.337	84
																				Row 4:hESC +ACL vs. Row 7:hESC + ACLi	7.5	1.104	6.396	7.362	3	3	1.229	84
																				Row 4:hESC + ACLi vs. Row 5:hEPSC + ACL	1.438	31.17	-29.73	7.362	3	3	5.711	84
																				Row 4:hESC + ACLi vs. Row 5:Rset + ACL	1.438	57.33	-55.9	7.362	3	3	10.74	84
																				Row 4:hESC + ACLi vs. Row 5:hEPSC +ACLi	1.438	3.708	-2.271	7.362	3	3	0.4362	84
																				Row 4:hESC + ACLi vs. Row 5:Rset + ACLi	1.438	8	-6.563	7.362	3	3	1.261	84
																				Row 4:hESC + ACLi vs. Row 5:hESC +ACL	1.438	15.19	-13.75	7.362	3	3	2.641	84
																				Row 4:hESC + ACLi vs. Row 5:hESC + ACLi	1.438	1.104	0.3333	7.362	3	3	0.06403	84
																				Row 4:hESC + ACLi vs. Row 6:hEPSC + ACL	1.438	43.96	-42.52	7.362	3	3	8.168	84
																				Row 4:hESC + ACLi vs. Row 6:Rset + ACL	1.438	71.13	-69.69	7.362	3	3	13.39	84
																				Row 4:hESC + ACLi vs. Row 6:hEPSC +ACLi	1.438	2.729	-1.292	7.362	3	3	0.2481	84
																				Row 4:hESC + ACLi vs. Row 6:Rset + ACLi	1.438	8.375	-6.938	7.362	3	3	1.333	84
																				Row 4:hESC + ACLi vs. Row 6:hESC +ACL	1.438	32.77	-31.33	7.362	3	3	6.019	84
																				Row 4:hESC + ACLi vs. Row 6:hESC + ACLi	1.438	1.104	0.3333	7.362	3	3	0.06403	84
																				Row 4:hESC + ACLi vs. Row 7:hEPSC + ACL	1.438	51.21	-49.77	7.362	3	3	9.561	84
																				Row 4:hESC + ACLi vs. Row 7:Rset + ACL	1.438	71.08	-69.65	7.362	3	3	13.38	84
																				Row 4:hESC + ACLi vs. Row 7:hEPSC +ACLi	1.438	1.146	0.2917	7.362	3	3	0.05603	84
																				Row 4:hESC + ACLi vs. Row 7:Rset + ACLi	1.438	6.188	-4.75	7.362	3	3	0.9124	84
																				Row 4:hESC + ACLi vs. Row 7:hESC +ACL	1.438	56.1	-54.67	7.362	3	3	10.5	84
																				Row 4:hESC + ACLi vs. Row 7:hESC + ACLi	1.438	1.104	0.3333	7.362	3	3	0.06403	84
																				Row 5:hEPSC + ACL vs. Row 5:Rset + ACL	31.17	57.33	-26.17	7.362	3	3	5.026	84
																				Row 5:hEPSC + ACL vs. Row 5:hEPSC +ACLi	31.17	3.708	27.46	7.362	3	3	5.275	84
																				Row 5:hEPSC + ACL vs. Row 5:Rset + ACLi	31.17	8	23.17	7.362	3	3	4.45	84
																				Row 5:hEPSC + ACL vs. Row 5:hESC +ACL	31.17	15.19	15.98	7.362	3	3	3.069	84
																				Row 5:hEPSC + ACL vs. Row 5:hESC + ACLi	31.17	1.104	30.06	7.362	3	3	5.775	84
																				Row 5:hEPSC + ACL vs. Row 6:hEPSC + ACL	31.17	43.96	-12.79	7.362	3	3	2.457	84
																				Row 5:hEPSC + ACL vs. Row 6:Rset + ACL	31.17	71.13	-39.96	7.362	3	3	7.676	84
																				Row 5:hEPSC + ACL vs. Row 6:hEPSC +ACLi	31.17	2.729	28.44	7.362	3	3	5.463	84
																				Row 5:hEPSC + ACL vs. Row 6:Rset + ACLi	31.17	8.375	22.79	7.362	3	3	4.378	84
																				Row 5:hEPSC + ACL vs. Row 6:hESC +ACL	31.17	32.77	-1.604	7.362	3	3	0.3081	84
																				Row 5:hEPSC + ACL vs. Row 6:hESC + ACLi	31.17	1.104	30.06	7.362	3	3	5.775	84
																				Row 5:hEPSC + ACL vs. Row 7:hEPSC + ACL	31.17	51.21	-20.04	7.362	3	3	3.85	84
																				Row 5:hEPSC + ACL vs. Row 7:Rset + ACL	31.17	71.08	-39.92	7.362	3	3	7.668	84
																				Row 5:hEPSC + ACL vs. Row 7:hEPSC +ACLi	31.17	1.146	30.02	7.362	3	3	5.767	84
																				Row 5:hEPSC + ACL vs. Row 7:Rset + ACLi	31.17	6.188	24.98	7.362	3	3	4.798	84
																				Row 5:hEPSC + ACL vs. Row 7:hESC +ACL	31.17	56.1	-24.94	7.362	3	3	4.79	84
																				Row 5:hEPSC + ACL vs. Row 7:hESC + ACLi	31.17	1.104	30.06	7.362	3	3	5.775	84
																				Row 5:Rset + ACL vs. Row 5:hEPSC +ACLi	57.33	3.708	53.63	7.362	3	3	10.3	84
																				Row 5:Rset + ACL vs. Row 5:Rset + ACLi	57.33	8	49.33	7.362	3	3	9.477	84
																				Row 5:Rset + ACL vs. Row 5:hESC +ACL	57.33	15.19	42.15	7.362	3	3	8.096	84
																				Row 5:Rset + ACL vs. Row 5:hESC + ACLi	57.33	1.104	56.23	7.362	3	3	10.8	84
																				Row 5:Rset + ACL vs. Row 6:hEPSC + ACL	57.33	43.96	13.38	7.362	3	3	2.569	84
																				Row 5:Rset + ACL vs. Row 6:Rset + ACL	57.33	71.13	-13.79	7.362	3	3	2.649	84
																				Row 5:Rset + ACL vs. Row 6:hEPSC +ACLi	57.33	2.729	54.6	7.362	3	3	10.49	84
																				Row 5:Rset + ACL vs. Row 6:Rset + ACLi	57.33	8.375	48.96	7.362	3	3	9.405	84
																				Row 5:Rset + ACL vs. Row 6:hESC +ACL	57.33	32.77	24.56	7.362	3	3	4.718	84
																				Row 5:Rset + ACL vs. Row 6:hESC + ACLi	57.33	1.104	56.23	7.362	3	3	10.8	84
																				Row 5:Rset + ACL vs. Row 7:hEPSC + ACL	57.33	51.21	6.125	7.362	3	3	1.177	84
																				Row 5:Rset + ACL vs. Row 7:Rset + ACL	57.33	71.08	-13.75	7.362	3	3	2.641	84
																				Row 5:Rset + ACL vs. Row 7:hEPSC +ACLi	57.33	1.146	56.19	7.362	3	3	10.79	84
																				Row 5:Rset + ACL vs. Row 7:Rset + ACLi	57.33	6.188	51.15	7.362	3	3	9.825	84
																				Row 5:Rset + ACL vs. Row 7:hESC +ACL	57.33	56.1	1.229	7.362	3	3	0.2361	84
																				Row 5:Rset + ACL vs. Row 7:hESC + ACLi	57.33	1.104	56.23	7.362	3	3	10.8	84
																				Row 5:hEPSC +ACLi vs. Row 5:Rset + ACLi	3.708	8	-4.292	7.362	3	3	0.8244	84
																				Row 5:hEPSC +ACLi vs. Row 5:hESC +ACL	3.708	15.19	-11.48	7.362	3	3	2.205	84
																				Row 5:hEPSC +ACLi vs. Row 5:hESC + ACLi	3.708	1.104	2.604	7.362	3	3	0.5002	84
																				Row 5:hEPSC +ACLi vs. Row 6:hEPSC + ACL	3.708	43.96	-40.25	7.362	3	3	7.732	84
																				Row 5:hEPSC +ACLi vs. Row 6:Rset + ACL	3.708	71.13	-67.42	7.362	3	3	12.95	84
																				Row 5:hEPSC +ACLi vs. Row 6:hEPSC +ACLi	3.708	2.729	0.9792	7.362	3	3	0.1881	84
																				Row 5:hEPSC +ACLi vs. Row 6:Rset + ACLi	3.708	8.375	-4.667	7.362	3	3	0.8964	84
																				Row 5:hEPSC +ACLi vs. Row 6:hESC +ACL	3.708	32.77	-29.06	7.362	3	3	5.583	84
																				Row 5:hEPSC +ACLi vs. Row 6:hESC + ACLi	3.708	1.104	2.604	7.362	3	3	0.5002	84
																				Row 5:hEPSC +ACLi vs. Row 7:hEPSC + ACL	3.708	51.21	-47.5	7.362	3	3	9.124	84
																				Row 5:hEPSC +ACLi vs. Row 7:Rset + ACL	3.708	71.08	-67.38	7.362	3	3	12.94	84
																				Row 5:hEPSC +ACLi vs. Row 7:hEPSC +ACLi	3.708	1.146	2.563	7.362	3	3	0.4922	84
																				Row 5:hEPSC +ACLi vs. Row 7:Rset + ACLi	3.708	6.188	-2.479	7.362	3	3	0.4762	84
																				Row 5:hEPSC +ACLi vs. Row 7:hESC +ACL	3.708	56.1	-52.4	7.362	3	3	10.06	84
																				Row 5:hEPSC +ACLi vs. Row 7:hESC + ACLi	3.708	1.104	2.604	7.362	3	3	0.5002	84
																				Row 5:Rset + ACLi vs. Row 5:hESC +ACL	8	15.19	-7.188	7.362	3	3	1.381	84
																				Row 5:Rset + ACLi vs. Row 5:hESC + ACLi	8	1.104	6.896	7.362	3	3	1.325	84
																				Row 5:Rset + ACLi vs. Row 6:hEPSC + ACL	8	43.96	-35.96	7.362	3	3	6.907	84
																				Row 5:Rset + ACLi vs. Row 6:Rset + ACL	8	71.13	-63.13	7.362	3	3	12.13	84
																				Row 5:Rset + ACLi vs. Row 6:hEPSC +ACLi	8	2.729	5.271	7.362	3	3	1.012	84
																				Row 5:Rset + ACLi vs. Row 6:Rset + ACLi	8	8.375	-0.375	7.362	3	3	0.07203	84
																				Row 5:Rset + ACLi vs. Row 6:hESC +ACL	8	32.77	-24.77	7.362	3	3	4.758	84
																				Row 5:Rset + ACLi vs. Row 6:hESC + ACLi	8	1.104	6.896	7.362	3	3	1.325	84
																				Row 5:Rset + ACLi vs. Row 7:hEPSC + ACL	8	51.21	-43.21	7.362	3	3	8.3	84
																				Row 5:Rset + ACLi vs. Row 7:Rset + ACL	8	71.08	-63.08	7.362	3	3	12.12	84
																				Row 5:Rset + ACLi vs. Row 7:hEPSC +ACLi	8	1.146	6.854	7.362	3	3	1.317	84
																				Row 5:Rset + ACLi vs. Row 7:Rset + ACLi	8	6.188	1.813	7.362	3	3	0.3482	84
																				Row 5:Rset + ACLi vs. Row 7:hESC +ACL	8	56.1	-48.1	7.362	3	3	9.24	84
																				Row 5:Rset + ACLi vs. Row 7:hESC + ACLi	8	1.104	6.896	7.362	3	3	1.325	84
																				Row 5:hESC +ACL vs. Row 5:hESC + ACLi	15.19	1.104	14.08	7.362	3	3	2.705	84
																				Row 5:hESC +ACL vs. Row 6:hEPSC + ACL	15.19	43.96	-28.77	7.362	3	3	5.527	84
																				Row 5:hESC +ACL vs. Row 6:Rset + ACL	15.19	71.13	-55.94	7.362	3	3	10.75	84
																				Row 5:hESC +ACL vs. Row 6:hEPSC +ACLi	15.19	2.729	12.46	7.362	3	3	2.393	84
																				Row 5:hESC +ACL vs. Row 6:Rset + ACLi	15.19	8.375	6.813	7.362	3	3	1.309	84
																				Row 5:hESC +ACL vs. Row 6:hESC +ACL	15.19	32.77	-17.58	7.362	3	3	3.378	84
																				Row 5:hESC +ACL vs. Row 6:hESC + ACLi	15.19	1.104	14.08	7.362	3	3	2.705	84
																				Row 5:hESC +ACL vs. Row 7:hEPSC + ACL	15.19	51.21	-36.02	7.362	3	3	6.919	84
																				Row 5:hESC +ACL vs. Row 7:Rset + ACL	15.19	71.08	-55.9	7.362	3	3	10.74	84
																				Row 5:hESC +ACL vs. Row 7:hEPSC +ACLi	15.19	1.146	14.04	7.362	3	3	2.697	84
																				Row 5:hESC +ACL vs. Row 7:Rset + ACLi	15.19	6.188	9	7.362	3	3	1.729	84
																				Row 5:hESC +ACL vs. Row 7:hESC +ACL	15.19	56.1	-40.92	7.362	3	3	7.86	84
																				Row 5:hESC +ACL vs. Row 7:hESC + ACLi	15.19	1.104	14.08	7.362	3	3	2.705	84
																				Row 5:hESC + ACLi vs. Row 6:hEPSC + ACL	1.104	43.96	-42.85	7.362	3	3	8.232	84
																				Row 5:hESC + ACLi vs. Row 6:Rset + ACL	1.104	71.13	-70.02	7.362	3	3	13.45	84
																				Row 5:hESC + ACLi vs. Row 6:hEPSC +ACLi	1.104	2.729	-1.625	7.362	3	3	0.3122	84
																				Row 5:hESC + ACLi vs. Row 6:Rset + ACLi	1.104	8.375	-7.271	7.362	3	3	1.397	84
																				Row 5:hESC + ACLi vs. Row 6:hESC +ACL	1.104	32.77	-31.67	7.362	3	3	6.083	84
																				Row 5:hESC + ACLi vs. Row 6:hESC + ACLi	1.104	1.104	0	7.362	3	3	0	84
																				Row 5:hESC + ACLi vs. Row 7:hEPSC + ACL	1.104	51.21	-50.1	7.362	3	3	9.625	84
																				Row 5:hESC + ACLi vs. Row 7:Rset + ACL	1.104	71.08	-69.98	7.362	3	3	13.44	84
																				Row 5:hESC + ACLi vs. Row 7:hEPSC +ACLi	1.104	1.146	-0.04167	7.362	3	3	0.008004	84
																				Row 5:hESC + ACLi vs. Row 7:Rset + ACLi	1.104	6.188	-5.083	7.362	3	3	0.9765	84
																				Row 5:hESC + ACLi vs. Row 7:hESC +ACL	1.104	56.1	-55	7.362	3	3	10.57	84
																				Row 5:hESC + ACLi vs. Row 7:hESC + ACLi	1.104	1.104	0	7.362	3	3	0	84
																				Row 6:hEPSC + ACL vs. Row 6:Rset + ACL	43.96	71.13	-27.17	7.362	3	3	5.219	84
																				Row 6:hEPSC + ACL vs. Row 6:hEPSC +ACLi	43.96	2.729	41.23	7.362	3	3	7.92	84
																				Row 6:hEPSC + ACL vs. Row 6:Rset + ACLi	43.96	8.375	35.58	7.362	3	3	6.835	84
																				Row 6:hEPSC + ACL vs. Row 6:hESC +ACL	43.96	32.77	11.19	7.362	3	3	2.149	84
																				Row 6:hEPSC + ACL vs. Row 6:hESC + ACLi	43.96	1.104	42.85	7.362	3	3	8.232	84
																				Row 6:hEPSC + ACL vs. Row 7:hEPSC + ACL	43.96	51.21	-7.25	7.362	3	3	1.393	84
																				Row 6:hEPSC + ACL vs. Row 7:Rset + ACL	43.96	71.08	-27.13	7.362	3	3	5.211	84
																				Row 6:hEPSC + ACL vs. Row 7:hEPSC +ACLi	43.96	1.146	42.81	7.362	3	3	8.224	84
																				Row 6:hEPSC + ACL vs. Row 7:Rset + ACLi	43.96	6.188	37.77	7.362	3	3	7.256	84
																				Row 6:hEPSC + ACL vs. Row 7:hESC +ACL	43.96	56.1	-12.15	7.362	3	3	2.333	84
																				Row 6:hEPSC + ACL vs. Row 7:hESC + ACLi	43.96	1.104	42.85	7.362	3	3	8.232	84
																				Row 6:Rset + ACL vs. Row 6:hEPSC +ACLi	71.13	2.729	68.4	7.362	3	3	13.14	84
																				Row 6:Rset + ACL vs. Row 6:Rset + ACLi	71.13	8.375	62.75	7.362	3	3	12.05	84
																				Row 6:Rset + ACL vs. Row 6:hESC +ACL	71.13	32.77	38.35	7.362	3	3	7.368	84
																				Row 6:Rset + ACL vs. Row 6:hESC + ACLi	71.13	1.104	70.02	7.362	3	3	13.45	84
																				Row 6:Rset + ACL vs. Row 7:hEPSC + ACL	71.13	51.21	19.92	7.362	3	3	3.826	84
																				Row 6:Rset + ACL vs. Row 7:Rset + ACL	71.13	71.08	0.04167	7.362	3	3	0.008004	84
																				Row 6:Rset + ACL vs. Row 7:hEPSC +ACLi	71.13	1.146	69.98	7.362	3	3	13.44	84
																				Row 6:Rset + ACL vs. Row 7:Rset + ACLi	71.13	6.188	64.94	7.362	3	3	12.47	84
																				Row 6:Rset + ACL vs. Row 7:hESC +ACL	71.13	56.1	15.02	7.362	3	3	2.885	84
																				Row 6:Rset + ACL vs. Row 7:hESC + ACLi	71.13	1.104	70.02	7.362	3	3	13.45	84
																				Row 6:hEPSC +ACLi vs. Row 6:Rset + ACLi	2.729	8.375	-5.646	7.362	3	3	1.085	84
																				Row 6:hEPSC +ACLi vs. Row 6:hESC +ACL	2.729	32.77	-30.04	7.362	3	3	5.771	84
																				Row 6:hEPSC +ACLi vs. Row 6:hESC + ACLi	2.729	1.104	1.625	7.362	3	3	0.3122	84
																				Row 6:hEPSC +ACLi vs. Row 7:hEPSC + ACL	2.729	51.21	-48.48	7.362	3	3	9.313	84
																				Row 6:hEPSC +ACLi vs. Row 7:Rset + ACL	2.729	71.08	-68.35	7.362	3	3	13.13	84
																				Row 6:hEPSC +ACLi vs. Row 7:hEPSC +ACLi	2.729	1.146	1.583	7.362	3	3	0.3041	84
																				Row 6:hEPSC +ACLi vs. Row 7:Rset + ACLi	2.729	6.188	-3.458	7.362	3	3	0.6643	84
																				Row 6:hEPSC +ACLi vs. Row 7:hESC +ACL	2.729	56.1	-53.38	7.362	3	3	10.25	84
																				Row 6:hEPSC +ACLi vs. Row 7:hESC + ACLi	2.729	1.104	1.625	7.362	3	3	0.3122	84
																				Row 6:Rset + ACLi vs. Row 6:hESC +ACL	8.375	32.77	-24.4	7.362	3	3	4.686	84
																				Row 6:Rset + ACLi vs. Row 6:hESC + ACLi	8.375	1.104	7.271	7.362	3	3	1.397	84
																				Row 6:Rset + ACLi vs. Row 7:hEPSC + ACL	8.375	51.21	-42.83	7.362	3	3	8.228	84
																				Row 6:Rset + ACLi vs. Row 7:Rset + ACL	8.375	71.08	-62.71	7.362	3	3	12.05	84
																				Row 6:Rset + ACLi vs. Row 7:hEPSC +ACLi	8.375	1.146	7.229	7.362	3	3	1.389	84
																				Row 6:Rset + ACLi vs. Row 7:Rset + ACLi	8.375	6.188	2.188	7.362	3	3	0.4202	84
																				Row 6:Rset + ACLi vs. Row 7:hESC +ACL	8.375	56.1	-47.73	7.362	3	3	9.168	84
																				Row 6:Rset + ACLi vs. Row 7:hESC + ACLi	8.375	1.104	7.271	7.362	3	3	1.397	84
																				Row 6:hESC +ACL vs. Row 6:hESC + ACLi	32.77	1.104	31.67	7.362	3	3	6.083	84
																				Row 6:hESC +ACL vs. Row 7:hEPSC + ACL	32.77	51.21	-18.44	7.362	3	3	3.542	84
																				Row 6:hESC +ACL vs. Row 7:Rset + ACL	32.77	71.08	-38.31	7.362	3	3	7.36	84
																				Row 6:hESC +ACL vs. Row 7:hEPSC +ACLi	32.77	1.146	31.63	7.362	3	3	6.075	84
																				Row 6:hESC +ACL vs. Row 7:Rset + ACLi	32.77	6.188	26.58	7.362	3	3	5.106	84
																				Row 6:hESC +ACL vs. Row 7:hESC +ACL	32.77	56.1	-23.33	7.362	3	3	4.482	84
																				Row 6:hESC +ACL vs. Row 7:hESC + ACLi	32.77	1.104	31.67	7.362	3	3	6.083	84
																				Row 6:hESC + ACLi vs. Row 7:hEPSC + ACL	1.104	51.21	-50.1	7.362	3	3	9.625	84
																				Row 6:hESC + ACLi vs. Row 7:Rset + ACL	1.104	71.08	-69.98	7.362	3	3	13.44	84
																				Row 6:hESC + ACLi vs. Row 7:hEPSC +ACLi	1.104	1.146	-0.04167	7.362	3	3	0.008004	84
																				Row 6:hESC + ACLi vs. Row 7:Rset + ACLi	1.104	6.188	-5.083	7.362	3	3	0.9765	84
																				Row 6:hESC + ACLi vs. Row 7:hESC +ACL	1.104	56.1	-55	7.362	3	3	10.57	84
																				Row 6:hESC + ACLi vs. Row 7:hESC + ACLi	1.104	1.104	0	7.362	3	3	0	84
																				Row 7:hEPSC + ACL vs. Row 7:Rset + ACL	51.21	71.08	-19.88	7.362	3	3	3.818	84
																				Row 7:hEPSC + ACL vs. Row 7:hEPSC +ACLi	51.21	1.146	50.06	7.362	3	3	9.617	84
																				Row 7:hEPSC + ACL vs. Row 7:Rset + ACLi	51.21	6.188	45.02	7.362	3	3	8.648	84
																				Row 7:hEPSC + ACL vs. Row 7:hESC +ACL	51.21	56.1	-4.896	7.362	3	3	0.9405	84
																				Row 7:hEPSC + ACL vs. Row 7:hESC + ACLi	51.21	1.104	50.1	7.362	3	3	9.625	84
																				Row 7:Rset + ACL vs. Row 7:hEPSC +ACLi	71.08	1.146	69.94	7.362	3	3	13.43	84
																				Row 7:Rset + ACL vs. Row 7:Rset + ACLi	71.08	6.188	64.9	7.362	3	3	12.47	84
																				Row 7:Rset + ACL vs. Row 7:hESC +ACL	71.08	56.1	14.98	7.362	3	3	2.877	84
																				Row 7:Rset + ACL vs. Row 7:hESC + ACLi	71.08	1.104	69.98	7.362	3	3	13.44	84
																				Row 7:hEPSC +ACLi vs. Row 7:Rset + ACLi	1.146	6.188	-5.042	7.362	3	3	0.9685	84
																				Row 7:hEPSC +ACLi vs. Row 7:hESC +ACL	1.146	56.1	-54.96	7.362	3	3	10.56	84
																				Row 7:hEPSC +ACLi vs. Row 7:hESC + ACLi	1.146	1.104	0.04167	7.362	3	3	0.008004	84
																				Row 7:Rset + ACLi vs. Row 7:hESC +ACL	6.188	56.1	-49.92	7.362	3	3	9.589	84
																				Row 7:Rset + ACLi vs. Row 7:hESC + ACLi	6.188	1.104	5.083	7.362	3	3	0.9765	84
																				Row 7:hESC +ACL vs. Row 7:hESC + ACLi	56.1	1.104	55	7.362	3	3	10.57	84
