# Supplementary material for: An in vitro stem cell model of human epiblast and yolk sac interaction
Source: eLife. 2021 Aug 17;10:e63930. doi: 10.7554/eLife.63930 (PMC8370770; doi:10.7554/eLife.63930)
Supplement: Figure 1—figure supplement 2—source data 1. [file elife-63930-fig1-figsupp2-data1.xlsx]

## Sheet: F1F2A, B
qPCR Analysis of endoderm and pluripotency markers in RUES2 hPSCs and hPSC-ACL
Units = relative increase (=POWER(2,ΔΔCt)
	EOMES				EOMES				EOMES					POU5F1				POU5F1				POU5F1
	hEPSC	hEPSC-ACL			Rset	Rset-ACL			hESC	hESC-ACL				hEPSC	hEPSC-ACL			Rset	Rset-ACL			hESC	hESC-ACL
Exp 1	1	18.8569		Exp 1	1	96.4362		Exp 1	1	24.0326			Exp 1	1	6.53315		Exp 1	1	0.615697		Exp 1	1	1.96127
	0.817026	15.587			0.927265	89.8383			0.50898	24.3375				0.454283	1.68139			1.0265	0.958719			0.691434	2.24625
Exp 2	1	4.88996		Exp 2	1	93.8413		Exp 2	1	62.9031			Exp 2	1	2.74122		Exp 2	1	4.89839		Exp 2	1	3.26074
	0.714557	7.04886			1.01186	86.2158			0.260715	40.9079				0.753969	1.91425			8.80262	8.83714			0.991179	1.99197
Exp 3	1	26.0934		Exp 3	1	96.4362							Exp 3	1	4.62854		Exp 3	1	0.108391
	1.07922	22.2663			0.927265	89.8383								0.66105	5.03171			9.63214	0.0746048
Number of values	6	6		Number of values	6	6		Number of values	4	4			Number of values	6	6		Number of values	6	6		Number of values	4	4
Minimum	0.7146	4.89		Minimum	0.9273	86.22		Minimum	0.2607	24.03			Minimum	0.4543	1.681		Minimum	1	0.0746		Minimum	0.6914	1.961
25% Percentile	0.7914	6.509		25% Percentile	0.9273	88.93		25% Percentile	0.3228	24.11			25% Percentile	0.6094	1.856		25% Percentile	1	0.09994		25% Percentile	0.7664	1.969
Median	1	17.22		Median	1	91.84		Median	0.7545	32.62			Median	0.877	3.685		Median	1.013	0.7872		Median	0.9956	2.119
75% Percentile	1.02	23.22		75% Percentile	1.003	96.44		75% Percentile	1	57.4			75% Percentile	1	5.407		75% Percentile	9.01	5.883		75% Percentile	1	3.007
Maximum	1.079	26.09		Maximum	1.012	96.44		Maximum	1	62.9			Maximum	1	6.533		Maximum	9.632	8.837		Maximum	1	3.261
Mean	0.9351	15.79		Mean	0.9777	92.1		Mean	0.6924	38.05			Mean	0.8116	3.755		Mean	3.744	2.582		Mean	0.9207	2.365
Std. Deviation	0.1386	8.4		Std. Deviation	0.03936	4.135		Std. Deviation	0.3693	18.35			Std. Deviation	0.2281	1.94		Std. Deviation	4.248	3.561		Std. Deviation	0.1529	0.6106
Std. Error of Mean	0.05657	3.429		Std. Error of Mean	0.01607	1.688		Std. Error of Mean	0.1847	9.176			Std. Error of Mean	0.09312	0.7922		Std. Error of Mean	1.734	1.454		Std. Error of Mean	0.07643	0.3053
Lower 95% CI of mean	0.7897	6.976		Lower 95% CI of mean	0.9364	87.76		Lower 95% CI of mean	0.1047	8.844			Lower 95% CI of mean	0.5722	1.719		Lower 95% CI of mean	-0.7146	-1.155		Lower 95% CI of mean	0.6774	1.393
Upper 95% CI of mean	1.081	24.61		Upper 95% CI of mean	1.019	96.44		Upper 95% CI of mean	1.28	67.25			Upper 95% CI of mean	1.051	5.791		Upper 95% CI of mean	8.202	6.319		Upper 95% CI of mean	1.164	3.337
Sum	5.611	94.74		Sum	5.866	552.6		Sum	2.77	152.2			Sum	4.869	22.53		Sum	22.46	15.49		Sum	3.683	9.46
Column B	hEPSC + ACL			Column B	Rset + ACL			Column B	Primed + ACL				Column B	hEPSC + ACL			Column B	Rset + ACL			Column B	hESC-ACL
vs.	vs.			vs.	vs.			vs.	vs.				vs.	vs.			vs.	vs.			vs.	vs.
Column A	hEPSC			Column A	Rset			Column A	Primed				Column A	hEPSC			Column A	Rset			Column A	hESC
Mann Whitney test				Mann Whitney test				Mann Whitney test					Mann Whitney test				Mann Whitney test				Mann Whitney test
P value	0.0022			P value	0.0022			P value	0.0286				P value	0.0022			P value	0.1775			P value	0.0286
Exact or approximate P value?	Exact			Exact or approximate P value?	Exact			Exact or approximate P value?	Exact				Exact or approximate P value?	Exact			Exact or approximate P value?	Exact			Exact or approximate P value?	Exact
P value summary	**			P value summary	**			P value summary	*				P value summary	**			P value summary	ns			P value summary	*
Significantly different (P < 0.05)?	Yes			Significantly different (P < 0.05)?	Yes			Significantly different (P < 0.05)?	Yes				Significantly different (P < 0.05)?	Yes			Significantly different (P < 0.05)?	No			Significantly different (P < 0.05)?	Yes
One- or two-tailed P value?	Two-tailed			One- or two-tailed P value?	Two-tailed			One- or two-tailed P value?	Two-tailed				One- or two-tailed P value?	Two-tailed			One- or two-tailed P value?	Two-tailed			One- or two-tailed P value?	Two-tailed
Sum of ranks in column A,B	21 , 57			Sum of ranks in column A,B	21 , 57			Sum of ranks in column A,B	10 , 26				Sum of ranks in column A,B	21 , 57			Sum of ranks in column A,B	48 , 30			Sum of ranks in column A,B	10 , 26
Mann-Whitney U	0			Mann-Whitney U	0			Mann-Whitney U	0				Mann-Whitney U	0			Mann-Whitney U	9			Mann-Whitney U	0
Difference between medians				Difference between medians				Difference between medians					Difference between medians				Difference between medians				Difference between medians
Median of column A	1, n=6			Median of column A	1, n=6			Median of column A	0.7545, n=4				Median of column A	0.877, n=6			Median of column A	1.013, n=6			Median of column A	0.9956, n=4
Median of column B	17.22, n=6			Median of column B	91.84, n=6			Median of column B	32.62, n=4				Median of column B	3.685, n=6			Median of column B	0.7872, n=6			Median of column B	2.119, n=4
Difference: Actual	16.22			Difference: Actual	90.84			Difference: Actual	31.87				Difference: Actual	2.808			Difference: Actual	-0.226			Difference: Actual	1.124
Difference: Hodges-Lehmann	16.33			Difference: Hodges-Lehmann	90.87			Difference: Hodges-Lehmann	31.99				Difference: Hodges-Lehmann	2.958			Difference: Hodges-Lehmann	-0.8433			Difference: Hodges-Lehmann	1.251

## Sheet: F1F2C, D
Flourescence intensity analysis of SOX2 and GATA6 in H9 hEPSCs treated with ACL for 6 days using Fiji
Units = fluorescence intensity (a.u.)
	Exp 1	Average flourescence intensity (A.U.)	32.0572	15.3219	1	1		Exp 1	Average flourescence intensity (A.U.)	32.8017	39.145	1.02323	2.55485		Exp 2	Average flourescence intensity (A.U.)	80.6031	19.4711	1	1		Exp 2	Average flourescence intensity (A.U.)	71.4778	92.0007	0.886788	4.72498			Exp 3	Average flourescence intensity (A.U.)	17.2696	5.66021	1	1		Exp 3	Average flourescence intensity (A.U.)	19.4644	22.8062	1.12709	4.02921
	Control	Standard Deviation	19.0633	24.9758	0.594666	1.63008		ACL	Standard Deviation	26.095	37.7268	0.814015	2.46229		Control	Standard Deviation	38.9059	24.316	0.482685	1.24882		ACL	Standard Deviation	50.19	63.5991	0.622681	3.26633			Control	Standard Deviation	12.8725	11.1552	0.745383	1.97082		ACL	Standard Deviation	17.9603	22.558	1.03999	3.98537
			SOX2	GATA6	rel SOX2	rel GATA6				SOX2	GATA6	rel SOX2	rel GATA6				SOX2	GATA6	rel SOX2	rel GATA6				SOX2	GATA6	rel SOX2	rel GATA6					SOX2	GATA6	rel SOX2	rel GATA6				SOX2	GATA6	rel SOX2	rel GATA6				SOX2
			37.552	2.37	1.17141	0.154681				14.665	55.329	0.457464	3.61111				181.942	15.474	2.25726	0.794715				181.891	10.195	2.25663	0.523596					26.586	0.684	1.53947	0.120844				13.974	57.674	0.809167	10.1894				Number of values	2375	2139
			21.581	3.221	0.673204	0.210222				33.674	1.345	1.05044	0.0877831				171.437	14.058	2.12693	0.721992				154.813	10.692	1.92068	0.549121					9.621	32.226	0.557106	5.69343				16.797	27.413	0.972633	4.84311
			11.714	4.693	0.36541	0.306294				43.21	7.672	1.3479	0.500722				123.213	12.445	1.52864	0.639151				168.691	9.899	2.09286	0.508394					6.472	8.633	0.374762	1.52521				14.13	24.954	0.8182	4.40867				Minimum	0.05675	0.0506
			10.232	12.198	0.31918	0.796117				10.859	40.766	0.338739	2.66064				124.688	11.613	1.54694	0.596421				163.297	10.719	2.02594	0.550507					8.619	11.354	0.499085	2.00593				55.289	0.827	3.20152	0.146108				25% Percentile	0.5412	0.4701
			14.368	4.187	0.448199	0.27327				12.323	38.923	0.384407	2.54036				96.7	11.958	1.19971	0.61414				153.067	8.714	1.89902	0.447534					21.286	0.477	1.23257	0.0842725				47.804	0.904	2.7681	0.159711				Median	0.8594	0.6601
			12.412	4.52	0.387183	0.295003				57.93	1.478	1.80708	0.0964635				115.461	13.901	1.43246	0.713929				106.929	11.725	1.32661	0.602173					4.49	0.205	0.259994	0.0362177				14.592	52.724	0.844952	9.31485				75% Percentile	1.265	1.28
			21.45	2.613	0.669117	0.170541				15.624	41.791	0.487379	2.72754				172.663	13.533	2.14214	0.695029				165.048	11.705	2.04766	0.601146					23.963	0.576	1.38758	0.101763				72.847	0.848	4.21822	0.149818				Maximum	4.491	5.482
			11.118	2.713	0.346818	0.177067				13.006	19.224	0.405713	1.25468				126.3	11.069	1.56694	0.568483				154.917	12.904	1.92197	0.662725					6.047	6.189	0.350153	1.09342				14.077	1.464	0.815131	0.258648
			31.42	2.865	0.980124	0.186988				44.033	1.612	1.37358	0.105209				222.749	17.786	2.76353	0.913455				156.745	14.375	1.94465	0.738272					44.035	0.489	2.54985	0.0863925				5.746	0.881	0.332723	0.155648				Mean	1	1.019
			40.496	2.647	1.26324	0.17276				18.141	1.597	0.565895	0.10423				124.585	13.192	1.54566	0.677516				138.962	11.989	1.72403	0.615732					37.68	0.623	2.18187	0.110067				71.663	0.549	4.14966	0.0969928				Std. Deviation	0.6231	0.858
			8.048	10.48	0.251052	0.68399				49.866	1.598	1.55553	0.104295				116.123	12.491	1.44068	0.641514				185.48	9.34	2.30115	0.479684					9.519	41.26	0.551199	7.28948				78.931	0.893	4.57051	0.157768				Std. Error of Mean	0.01279	0.01855
			7.311	10.422	0.228061	0.680205				10.427	54.925	0.325263	3.58475				126.837	11.736	1.5736	0.602738				164.635	9.704	2.04254	0.498379					24.675	0.49	1.42881	0.0865692				10.492	52.73	0.607541	9.31591
			25.455	2.71	0.79405	0.176871				58.58	1.952	1.82736	0.1274				109.301	13.698	1.35604	0.703503				130.507	9.007	1.61913	0.462582					53.865	0.473	3.11906	0.0835658				2.936	0.852	0.17001	0.150524				Lower 95% CI of mean	0.9749	0.9826
			13.456	5.218	0.41975	0.340559				8.006	33.339	0.249741	2.17591				152.724	14.825	1.89477	0.761384				192.459	11.584	2.38774	0.594932					14.751	0.657	0.854159	0.116073				15.471	50.993	0.895851	9.00903				Upper 95% CI of mean	1.025	1.055
			38.467	2.984	1.19995	0.194754				35.123	1.575	1.09564	0.102794				103.311	15.132	1.28173	0.77715				78.415	9.815	0.972854	0.50408					32.811	0.495	1.89993	0.0874526				43.232	0.742	2.50336	0.131091
			33.253	2.923	1.0373	0.190773				63.902	1.959	1.99338	0.127857				119.103	13.642	1.47765	0.700627				50.878	104.432	0.631217	5.36343					6.876	4.22	0.398156	0.745555				9.668	33.804	0.559827	5.97222				Sum	2375	2180
			41.253	2.925	1.28686	0.190904				41.582	3.715	1.29712	0.242464				144.167	16.093	1.7886	0.826506				136.538	9.576	1.69396	0.491805					35.071	0.589	2.03079	0.10406				58.729	0.596	3.40071	0.105296
			29.669	2.707	0.925503	0.176676				43.885	2.069	1.36896	0.135036				201.607	15.499	2.50123	0.795999				165.883	8.767	2.05802	0.450256					30.529	0.55	1.76779	0.0971695				33.212	0.726	1.92315	0.128264				D'Agostino & Pearson normality test
			12.111	30.011	0.377794	1.9587				56.334	1.582	1.7573	0.103251				143.492	14.12	1.78023	0.725176				209.266	10.497	2.59625	0.539106					12.229	0.885	0.708122	0.156355				13.718	45.753	0.794343	8.08327				K2	658.4	730.5
			39.557	3.567	1.23395	0.232805				41.77	3.792	1.30298	0.247489				210.837	15.201	2.61574	0.780694				150.965	22.894	1.87294	1.17579					50.193	0.538	2.90643	0.0950495				71.151	0.865	4.12001	0.152821				P value	<0.0001	<0.0001
			39.303	3.389	1.22603	0.221187				14.92	41.168	0.465419	2.68688				170.557	13.884	2.11601	0.713056				95.291	17.988	1.18223	0.923829					57.996	0.508	3.35827	0.0897493				31.041	0.442	1.79743	0.078089				Passed normality test (alpha=0.05)?	No	No
			58.688	3.94	1.83073	0.257149				11.737	58.922	0.366127	3.84562				121.1	13.579	1.50242	0.697391				147.457	9.815	1.82942	0.50408					47.377	0.613	2.74337	0.1083				14.691	68.276	0.850685	12.0624				P value summary	****	****
			34.483	3.155	1.07567	0.205915				52.43	1.648	1.63552	0.107559				136.826	11.47	1.69753	0.589077				63.633	80.274	0.789461	4.12272					60.575	0.689	3.50761	0.121727				85.915	0.711	4.97492	0.125614
			14.925	36.148	0.465575	2.35924				12.467	43.434	0.388899	2.83477				218.02	15.228	2.70486	0.782081				194.729	10.958	2.4159	0.562782					42.376	0.41	2.45379	0.0724355				80.777	0.887	4.67741	0.156708
			14.865	108.566	0.463703	7.08569				10.536	47.736	0.328663	3.11555				198.177	15.543	2.45868	0.798259				174.4	9.809	2.16369	0.503771					72.579	0.705	4.2027	0.124554				80.469	0.527	4.65957	0.0931061
			10.955	77.664	0.341733	5.06884				49.924	2.069	1.55734	0.135036				174.373	12.611	2.16335	0.647677				164.591	9.147	2.04199	0.469772					53.786	0.604	3.11449	0.10671				44.044	0.793	2.55038	0.140101				Column B	hEPSC-ACL
			11.534	97.36	0.359795	6.35432				13.087	56.786	0.408239	3.70621				160.78	11.969	1.99471	0.614705				132.933	8.7	1.64923	0.446815					14.801	1.217	0.857055	0.21501				63.635	0.59	3.6848	0.104236				vs.	vs.
			15.2	110.023	0.474153	7.18078				7.597	47.656	0.236983	3.11033				154.834	14.996	1.92094	0.770166				139.226	9.566	1.7273	0.491291					65.59	0.452	3.798	0.0798557				13.869	61.152	0.803087	10.8038				Column A	hEPSC
			36.762	3.232	1.14676	0.21094				26.944	2.142	0.840499	0.1398				220.705	17.689	2.73817	0.908473				36.949	119.012	0.458407	6.11223					42.468	0.645	2.45912	0.113953				55.498	0.665	3.21362	0.117487
			10.258	94.753	0.319991	6.18417				22.99	36.059	0.717156	2.35343				196.891	15.832	2.44272	0.813101				204.467	10.433	2.53671	0.535819					20.663	0.614	1.19649	0.108477				75.803	1.737	4.38939	0.306879				Mann Whitney test
			17.401	74.234	0.542812	4.84497				10.347	51.013	0.322767	3.32943				150.25	14.937	1.86407	0.767136				177.324	11.927	2.19997	0.612548					48.936	0.772	2.83365	0.136391				20.334	1.654	1.17744	0.292215				P value	<0.0001
			41.067	3.504	1.28106	0.228693				18.351	30.508	0.572446	1.99114				148.082	14.506	1.83718	0.745				116.563	9.593	1.44614	0.492678					39.867	0.619	2.30851	0.10936				24.697	5.534	1.43008	0.977702				Exact or approximate P value?	Approximate
			69	2.988	2.1524	0.195015				14.922	64.208	0.465481	4.19061				191.81	16.13	2.37969	0.828406				97.114	9.303	1.20484	0.477784					56.098	0.537	3.24836	0.0948728				54.136	0.527	3.13475	0.0931061				P value summary	****
			35.932	3.046	1.12087	0.198801				13.663	43.08	0.426207	2.81167				199.602	16.284	2.47636	0.836315				160.476	10.292	1.99094	0.528577					21.173	0.758	1.22603	0.133917				6.16	35.495	0.356696	6.27097				Significantly different (P < 0.05)?	Yes
			44.576	3.539	1.39052	0.230977				15.59	44.348	0.486319	2.89443				131.986	13.508	1.63748	0.693745				174.111	10.347	2.1601	0.531402					13.366	0.522	0.773961	0.0922227				10.878	31.602	0.629893	5.58318				One- or two-tailed P value?	Two-tailed
			26.193	3.849	0.817072	0.25121				22.45	32.686	0.700311	2.13329				190.171	17.056	2.35935	0.875963				204.265	12.909	2.53421	0.662981					67.187	0.775	3.89048	0.136921				10.59	12.577	0.613216	2.222				Sum of ranks in column A,B	5634540 , 4555816
			20.28	3.101	0.63262	0.202391				17.179	63.671	0.535886	4.15557				195.843	17.797	2.42972	0.91402				171.636	11.103	2.1294	0.570229					36.768	0.59	2.12906	0.104236				23.5	1.948	1.36077	0.344157				Mann-Whitney U	2267086
			61.416	3.436	1.91583	0.224255				62.237	1.681	1.94144	0.109713				206.104	18.997	2.55702	0.975649				233.517	12.598	2.89712	0.647009					55.712	0.605	3.22601	0.106886				18.98	1.798	1.09904	0.317656
			21.648	107.748	0.675294	7.0323				14.258	53.314	0.444768	3.4796				155.686	13.756	1.93151	0.706482				147.926	14.106	1.83524	0.724457					13.158	1.376	0.761916	0.2431				18.396	66.635	1.06522	11.7725				Difference between medians
			11.062	22.184	0.345071	1.44787				52.129	1.445	1.62613	0.0943097				223.3	17.689	2.77037	0.908473				150.504	13.072	1.86722	0.671353					45.823	0.893	2.65339	0.157768				35.167	0.612	2.03635	0.108123				Median of column A	0.8594, n=2375
			20.322	103.201	0.63393	6.73554				15.541	39.211	0.48479	2.55915				111.268	14.227	1.38044	0.730671				51.983	148.262	0.644926	7.61445					35.866	0.546	2.07683	0.0964628				4.507	3.376	0.260979	0.596444				Median of column B	0.6601, n=2139
			45.889	2.988	1.43147	0.195015				15.613	68.275	0.487036	4.45605				193.474	17.451	2.40033	0.89625				39.993	112.529	0.496172	5.77927					18.225	0.665	1.05532	0.117487				10.721	30.137	0.620801	5.32436				Difference: Actual	-0.1993
			12.209	22.156	0.380851	1.44604				49.275	4.762	1.5371	0.310798				186.437	18.081	2.31303	0.928605				51.971	148.963	0.644777	7.65045					18.332	0.496	1.06152	0.0876292				5.38	14.613	0.31153	2.58171				Difference: Hodges-Lehmann	-0.08918
			93.473	3.219	2.91582	0.210092				67.33	1.345	2.10031	0.0877831				173.717	17.332	2.15522	0.890138				60.779	162.369	0.754053	8.33896					29.817	0.457	1.72656	0.080739				54.447	1.823	3.15276	0.322073
			19.083	96.746	0.59528	6.31425				45.993	2.11	1.43472	0.137712				196.184	17.808	2.43395	0.914585				58.522	158.426	0.726052	8.13645					8.726	0.786	0.505281	0.138864				9.396	35.273	0.544077	6.23175
			66.818	3.523	2.08434	0.229933				14.249	54.927	0.444487	3.58488				177.356	19.841	2.20036	1.019				54.759	27.163	0.679366	1.39504					39.013	0.671	2.25905	0.118547				11.302	23.192	0.654444	4.09737
			59.248	3.457	1.8482	0.225625				14.139	47.49	0.441056	3.09949				204.228	17.19	2.53375	0.882845				60.877	28.376	0.755269	1.45734					14.076	23.773	0.815073	4.20002				11.795	39.355	0.682992	6.95292
			22.554	13.989	0.703556	0.913009				14.852	50.387	0.463297	3.28857				72.253	11.516	0.896405	0.59144				47.604	152.66	0.590598	7.84032					34.149	0.693	1.9774	0.122434				7.574	18.131	0.438574	3.20324
			11.054	11.908	0.344822	0.77719				14.557	63.635	0.454095	4.15322				71.888	10.786	0.891877	0.553948				196.595	11.057	2.43905	0.567866					28.94	0.661	1.67578	0.11678				12.192	48.175	0.70598	8.51117
			37.758	2.418	1.17783	0.157814				4.276	14.663	0.133387	0.956999				37.552	31.934	0.465888	1.64007				60.254	29.793	0.74754	1.53011					32.194	0.663	1.8642	0.117133				9.725	42.419	0.563128	7.49424
			55.815	2.596	1.74111	0.169431				7.011	18.047	0.218703	1.17786				65.258	8.058	0.809622	0.413843				40.155	155.134	0.498182	7.96738					25.864	0.5	1.49766	0.0883359				9.59	22.929	0.555311	4.05091
			68.991	2.746	2.15212	0.179221				12.792	53.11	0.399037	3.46629				87.604	9.032	1.08686	0.463866				43.082	143.433	0.534496	7.36644					19.972	0.718	1.15648	0.12685				15.043	29.789	0.871068	5.26288
			97.313	3.345	3.03561	0.218315				15.719	29.704	0.490343	1.93867				73.283	7.966	0.909184	0.409118				154.718	10.559	1.91951	0.54229					24.826	0.793	1.43755	0.140101				18.561	7.492	1.07478	1.32363
			14.315	6.92	0.446546	0.451642				16.182	57.281	0.504786	3.73851				94.409	10.77	1.17128	0.553126				137.443	9.806	1.70518	0.503617					15.075	1.931	0.872921	0.341153				13.38	23.66	0.774771	4.18006
			47.512	3.505	1.4821	0.228758				7.308	22.191	0.227968	1.44832				60.898	7.259	0.75553	0.372808				189.643	10.814	2.3528	0.555386					13.956	0.49	0.808125	0.0865692				9.953	6.588	0.57633	1.16391
			20.715	3.228	0.646189	0.210679				16.977	26.951	0.529585	1.75899				74.393	9.519	0.922955	0.488878				28.309	123.227	0.351215	6.3287					16.048	0.933	0.929262	0.164835				7.871	25.398	0.455772	4.48711
			42.38	3.96	1.32201	0.258454				20.152	86.709	0.628627	5.65917				120.435	11.14	1.49417	0.572129				78.969	11.523	0.979727	0.591799					43.304	0.501	2.50753	0.0885126				4.627	39.581	0.267927	6.99285
			73.921	3.004	2.30591	0.19606				18.894	29.345	0.589385	1.91524				61.624	6.224	0.764537	0.319653				149.603	11.001	1.85605	0.56499					8.43	48.682	0.488141	8.60074				14.694	49.87	0.850859	8.81062
			79.207	4.053	2.4708	0.264524				17.98	30.855	0.560873	2.01379				59.909	7.689	0.74326	0.394892				214.802	11.148	2.66494	0.57254					17.943	46.188	1.03899	8.16012				6.789	22.441	0.393118	3.96469
			34.05	3.609	1.06217	0.235546				16.148	26.383	0.503725	1.72192				126.491	9.634	1.56931	0.494784				223.373	13.876	2.77127	0.712645					18.777	1.976	1.08729	0.349104				4.091	7.757	0.23689	1.37044
			81.072	3.242	2.52898	0.211593				18.948	71.083	0.591069	4.63932				61.027	11.199	0.75713	0.575159				199.435	10.954	2.47429	0.562576					8.651	49.153	0.500938	8.68395				14.638	65.296	0.847616	11.536
			22.467	86.215	0.700842	5.62693				6.928	36.356	0.216114	2.37282				94.745	9.911	1.17545	0.50901				192.243	11.732	2.38506	0.602533					34.539	0.756	1.99999	0.133564				18.583	65.538	1.07605	11.5787
			29.01	71.333	0.904946	4.65564				10.633	36.392	0.331689	2.37517				54.528	14.686	0.6765	0.754245				215.84	13.316	2.67781	0.683884					11.188	36.626	0.647843	6.47078				9.661	49.807	0.559422	8.79949
			37.724	87.715	1.17677	5.72483				20.946	66.745	0.653395	4.35619				99.145	8.885	1.23004	0.456317				198.935	10.407	2.46808	0.534484					8.687	15.79	0.503022	2.78965				5.192	8.171	0.300644	1.44359
			100.183	3.034	3.12514	0.198018				13.844	52.598	0.431854	3.43287				56.372	8.935	0.699378	0.458884				205.905	13.355	2.55456	0.685887					58.51	0.46	3.38803	0.081269				12.106	38.192	0.701	6.74745
			25.579	99.924	0.797918	6.52166				13.16	57.696	0.410517	3.7656				63.99	8	0.79389	0.410865				187.457	9.81	2.32568	0.503823					16.054	2.179	0.92961	0.384968				13.42	19.67	0.777088	3.47514
			20.369	1.433	0.635396	0.0935265				11.113	34.775	0.346662	2.26963				107.975	11.099	1.33959	0.570023				207.257	11.253	2.57133	0.577932					29.195	0.655	1.69054	0.11572				10.513	55.952	0.608757	9.88514
			30.557	1.845	0.953203	0.120416				16.291	50.439	0.508186	3.29196				83.407	21.416	1.03479	1.09988				195.97	11.692	2.4313	0.600479					29.488	0.566	1.70751	0.0999963				11.076	60.143	0.641358	10.6256
			53.789	2.129	1.67791	0.138952				17.114	69.048	0.533859	4.5065				70.706	7.668	0.877212	0.393814				51.052	165.817	0.633375	8.51604					38.798	0.573	2.24661	0.101233				5.634	12.27	0.326238	2.16776
			14.817	3.026	0.462206	0.197496				16.277	48.524	0.507749	3.16698				53.534	8.579	0.664168	0.440601				178.651	12.967	2.21643	0.66596					16.918	2.194	0.97964	0.387618				12.219	69.006	0.707543	12.1914
			28.295	2.125	0.882642	0.138691				13.472	50.72	0.420249	3.3103				102.62	10.002	1.27315	0.513683				165.481	10.161	2.05304	0.521849					28.967	0.854	1.67734	0.150878				9.156	59.194	0.53018	10.4579
			19.427	2.324	0.606011	0.151679				4.159	11.22	0.129737	0.732287				67.532	7.126	0.837834	0.365978				48.822	152.578	0.605709	7.83611					6.454	8.926	0.37372	1.57697				17.882	68.467	1.03546	12.0962
			29.032	2.151	0.905632	0.140388				7.811	31.571	0.243658	2.06052				68.903	7.73	0.854843	0.396998				83.884	8.206	1.0407	0.421444					10.155	1.04	0.588027	0.183739				10.49	17.141	0.607425	3.02833
			6.917	2.31	0.215771	0.150765				10.983	43.208	0.342607	2.82002				109.95	11.164	1.36409	0.573362				43.172	134.733	0.535612	6.91963					10.492	1.721	0.607541	0.304052				7.565	18.075	0.438053	3.19334
			7.309	1.931	0.227999	0.126029				16.554	52.682	0.51639	3.43835				73.238	10.555	0.908625	0.542085				37.431	145.236	0.464387	7.45904					12.354	1.77	0.715361	0.312709				6	16.849	0.347431	2.97674
			28.449	2.15	0.887446	0.140322				17.746	33.345	0.553574	2.1763				73.987	9.615	0.917918	0.493808				168.126	10.187	2.08585	0.523185					8.843	0.822	0.512056	0.145224				71.847	0.486	4.16031	0.0858625
			22.671	62.638	0.707205	4.08815				13.365	1.225	0.416911	0.0799511				75.696	8.48	0.939121	0.435517				136.519	9.677	1.69372	0.496992					7.933	19.004	0.459362	3.35747				13.135	8.278	0.760585	1.46249
			19.36	2.24	0.603921	0.146196				29.627	1.283	0.924193	0.0837366				72.272	8.544	0.896641	0.438803				40.307	147.951	0.500068	7.59848					6.969	17.632	0.403541	3.11508				5.608	20.038	0.324732	3.54015
			39.337	2.885	1.22709	0.188293				9.409	19.993	0.293507	1.30487				31.38	12.341	0.389315	0.63381				160.807	12.014	1.99505	0.617016					9.677	1.183	0.560348	0.209003				9.431	7.245	0.546104	1.27999
			48.562	2.322	1.51486	0.151548				13.511	50.42	0.421466	3.29072				48.46	8.661	0.601218	0.444812				149.056	10.285	1.84926	0.528218					8.05	9.944	0.466137	1.75682				78.467	0.524	4.54365	0.092576
			41.202	2.501	1.28527	0.163231				2.741	7.699	0.0855035	0.502485				88.32	7.6	1.09574	0.390321				161.049	11.218	1.99805	0.576135					8.04	7.231	0.465558	1.27751				69.652	1.007	4.03321	0.177909
			27.731	2.246	0.865048	0.146588				24.457	19.865	0.762918	1.29651				48.155	8.029	0.597434	0.412354				187.405	10.435	2.32504	0.535922					8.465	28.981	0.490167	5.12013				8.431	24.266	0.488199	4.28712
			20.2	2.76	0.630124	0.180135				47.252	1.008	1.47399	0.0657883				57.352	8.578	0.711536	0.44055				151.675	11.662	1.88175	0.598938					9.643	1.275	0.55838	0.225257				14.095	8.342	0.816174	1.4738
			21.787	2.606	0.67963	0.170084				5.699	22.668	0.177776	1.47945				88.469	8.713	1.09759	0.447483				64.408	17.584	0.799076	0.90308					9.82	6.854	0.568629	1.21091				94.667	0.653	5.48171	0.115367
			50.556	2.657	1.57706	0.173412				6.828	31.396	0.212995	2.0491				68.07	8.013	0.844509	0.411532				37.25	157.917	0.462141	8.11031					12.348	1.143	0.715013	0.201936				5.305	19.75	0.307187	3.48927
			28.347	2.155	0.884264	0.140649				8.236	18.769	0.256916	1.22498				73.297	8.324	0.909357	0.427505				35.188	165.654	0.436559	8.50767					5.975	0.449	0.345983	0.0793257				73.877	0.683	4.27786	0.120667
			9.908	3.509	0.309073	0.229019				48.929	0.764	1.5263	0.0498634				53.868	6.638	0.668312	0.340915				114.356	9.953	1.41875	0.511167					7.718	19.618	0.446912	3.46595				77.362	0.546	4.47966	0.0964628
			25.027	1.96	0.780699	0.127922				7.099	43.387	0.221448	2.83171				70.647	7.889	0.87648	0.405164				39.352	158.854	0.48822	8.15844					9.398	0.328	0.544193	0.0579484				8.177	15.977	0.473491	2.82269
			32.917	2.048	1.02682	0.133665				15.539	0.973	0.484728	0.063504				68.595	7.113	0.851022	0.36531				72.968	113.327	0.905276	5.82026					10.707	0.591	0.619991	0.104413				49.232	0.591	2.85079	0.104413
			37.248	2.61	1.16192	0.170345				5.32	33.001	0.165954	2.15385				58.907	7.573	0.730828	0.388935				160.057	10.117	1.98574	0.51959					13.227	9.353	0.765912	1.65241				49.718	0.489	2.87893	0.0863925
			32.151	2.295	1.00293	0.149786				15.285	4.993	0.476804	0.325874				73.005	6.603	0.905735	0.339117				65.981	169.552	0.818592	8.70786					11.766	10.985	0.681312	1.94074				52.177	0.482	3.02132	0.0851558
			38.577	2.363	1.20338	0.154224				10.512	17.697	0.327914	1.15502				65.359	7.687	0.810875	0.39479				165.261	9.59	2.05031	0.492524					10.034	14.66	0.581021	2.59001				7.434	18.531	0.430467	3.27391
			34.137	2.34	1.06488	0.152723				54.88	1	1.71194	0.0652662				18.597	51.295	0.230723	2.63441				36.358	72.568	0.451075	3.72695					8.51	0.413	0.492773	0.0729655				8.952	51.055	0.518367	9.01998
			51.593	2.37	1.60941	0.154681				40.322	0.631	1.25782	0.041183				62.405	7.294	0.774226	0.374606				72.063	173.803	0.894048	8.92619					9.112	0.674	0.527632	0.119077				10.453	36.354	0.605283	6.42273
			25.856	2.252	0.806559	0.14698				45.988	1.091	1.43456	0.0712054				47.385	7.814	0.587881	0.401312				66.63	18.713	0.826643	0.961064					9.12	0.41	0.528095	0.0724355				12.744	37.385	0.737944	6.60488
			18.885	2.208	0.589104	0.144108				8.455	14.762	0.263748	0.96346				78.491	7.342	0.973797	0.377071				49.332	147.442	0.612036	7.57234					10.618	0.992	0.614837	0.175258				11.139	28.755	0.645006	5.0802
			47.647	2.539	1.48631	0.165711				29.227	0.774	0.911715	0.0505161				48.867	8.631	0.606267	0.443272				200.265	11.594	2.48458	0.595446					9.013	0.727	0.521899	0.12844				9.879	27.478	0.572045	4.85459
			29.36	2.036	0.915864	0.132882				31.101	0.904	0.970173	0.0590007				55.281	8.074	0.685842	0.414665				50.539	203.55	0.627011	10.4539					8.692	0.415	0.503312	0.0733188				11.481	28.387	0.664809	5.01518
			37.522	2.732	1.17047	0.178307				45.669	0.714	1.42461	0.0466001				56.044	8.415	0.695309	0.432178				39.669	194.84	0.492152	10.0066					10.296	0.597	0.596192	0.105473				15.564	45.193	0.901236	7.98433
			35.944	2.453	1.12125	0.160098				37.906	0.975	1.18245	0.0636346				36.792	9.25	0.456459	0.475062				40.603	199.953	0.50374	10.2692					8.719	0.445	0.504875	0.078619				10.203	36.672	0.590807	6.47891
			37.37	2.599	1.16573	0.169627				37.201	1.096	1.16046	0.0715318				28.348	9.798	0.351699	0.503206				162.123	11.68	2.01138	0.599862					9.629	0.612	0.557569	0.108123				10.411	42.662	0.602851	7.53717
			25.102	2.371	0.783039	0.154746				50.203	0.747	1.56605	0.0487539				55.259	7.967	0.685569	0.40917				194.029	11.573	2.40722	0.594367					9.982	11.525	0.57801	2.03614				11.087	42.21	0.641995	7.45732
			32.553	2.218	1.01547	0.14476				54.772	1.119	1.70857	0.0730329				62.676	7.857	0.777588	0.40352				202.37	12.315	2.5107	0.632475					16.78	0.605	0.971649	0.106886				14.813	40.376	0.857749	7.1333
			13.298	2.817	0.414821	0.183855				49.177	0.753	1.53404	0.0491455				74.246	9.404	0.921131	0.482971				203.667	13.258	2.52679	0.680905					9.401	30.493	0.544367	5.38725				10.719	43.836	0.620686	7.74459
			38.563	2.142	1.20294	0.1398				43.124	0.698	1.34522	0.0455558				54.709	7.134	0.678746	0.366389				64.188	138.688	0.796347	7.12275					6.692	33.394	0.387501	5.89978				8.584	24.173	0.497058	4.27069
			64.027	2.821	1.99728	0.184116				37.844	0.635	1.18052	0.041444				68.495	9.202	0.849782	0.472597				174.48	10.376	2.16468	0.532891					40.12	0.422	2.32316	0.0745555				8.828	25.38	0.511187	4.48393
			38.931	3.399	1.21442	0.22184				46.948	1.335	1.46451	0.0871304				80.514	9.067	0.998895	0.465664				39.39	150.987	0.488691	7.7544					8.591	22.116	0.497463	3.90727				12.812	26.244	0.741881	4.63658
			33.236	2.346	1.03677	0.153115				12.722	38.907	0.396854	2.53931				85.429	7.817	1.05987	0.401466				213.578	11.472	2.64975	0.58918					9.95	0.542	0.576157	0.0957561				12.595	47.324	0.729316	8.36082
			39.872	2.457	1.24378	0.160359				17.357	53.441	0.541439	3.48789				48.174	7.523	0.59767	0.386367				208.216	12.46	2.58323	0.639922					21.954	0.654	1.27125	0.115543				10.274	42.157	0.594918	7.44795
			42.532	2.6	1.32675	0.169692				13.528	12.453	0.421996	0.81276				43.165	15.726	0.535526	0.807657				218.037	13.207	2.70507	0.678286					12.391	0.677	0.717503	0.119607				15.676	37.837	0.907722	6.68473
			34.394	2.22	1.0729	0.144891				51.019	0.891	1.5915	0.0581522				61.052	7.237	0.75744	0.371678				84.406	8.002	1.04718	0.410967					12.204	0.616	0.706675	0.10883				16.5	59.146	0.955436	10.4494
			30.64	3.614	0.955793	0.235872				57.669	0.72	1.79894	0.0469917				93.178	9.267	1.15601	0.475935				92.599	7.825	1.14883	0.401877					12.019	16.466	0.695962	2.90908				11.415	34.777	0.660988	6.14412
			21.187	2.464	0.660913	0.160816				52.552	1.236	1.63932	0.080669				31.253	36.347	0.38774	1.86671				130.061	8.411	1.6136	0.431973					7.298	22.086	0.422592	3.90197				13.095	54.239	0.758268	9.5825
			22.356	4.63	0.697379	0.302183				40.703	0.813	1.2697	0.0530614				63.218	8.944	0.784313	0.459347				88.038	8.115	1.09224	0.416771					9.834	26.011	0.56944	4.59541				9.637	48.308	0.558032	8.53466
			34.607	2.609	1.07954	0.17028				49.635	0.838	1.54833	0.0546931				42.84	12.836	0.531493	0.659232				118.424	10.08	1.46922	0.517689					9.143	6.857	0.529427	1.21144				11.717	51.67	0.678475	9.12863
			33.896	2.518	1.05736	0.16434				8.578	29.078	0.267584	1.89781				35.729	12.201	0.443271	0.62662				81.396	8.015	1.00984	0.411635					13.966	18.039	0.808704	3.18698				52.111	0.454	3.0175	0.080209
			25.168	2.746	0.785097	0.179221				15.401	28.198	0.480423	1.84038				55.052	8.638	0.683001	0.443631				98.259	9.828	1.21905	0.504747					4.912	3.727	0.28443	0.658456				41.372	0.538	2.39565	0.0950495
			29.56	3.019	0.922103	0.197039				16.071	14.782	0.501323	0.964765				54.899	9.21	0.681103	0.473008				33.271	136.726	0.412776	7.02198					10.542	1.996	0.610436	0.352637				37.691	0.551	2.1825	0.0973462
			41.263	2.389	1.28717	0.155921				21.027	73.851	0.655922	4.81998				53.47	8.57	0.663374	0.440139				28.452	90.79	0.352989	4.6628					11.767	19.39	0.68137	3.42567				7.776	45.876	0.450271	8.105
			37.595	3.834	1.17275	0.250231				13.176	34.586	0.411016	2.2573				73.348	8.936	0.90999	0.458936				21.152	95.423	0.262422	4.90074					9.198	9.63	0.532612	1.70135				20.528	0.221	1.18868	0.0390445
			25.534	2.697	0.796515	0.176023				12.408	21.933	0.387059	1.43148				52.607	7.432	0.652667	0.381693				112.552	9.276	1.39637	0.476398					10.043	1.175	0.581542	0.207589				36.281	0.508	2.10086	0.0897493
			35.201	2.439	1.09807	0.159184				12.354	38.295	0.385374	2.49937				60.052	11.419	0.745034	0.586458				26.375	127.741	0.327221	6.56053					3.288	13.261	0.190392	2.34285				16.183	23.974	0.93708	4.23553
			37.436	2.261	1.16779	0.147567				12.135	44.262	0.378543	2.88881				55.226	9.908	0.68516	0.508856				105.633	9.167	1.31053	0.4708					8.236	12.887	0.476907	2.27677				12.148	48.815	0.703432	8.62424
			42.439	2.568	1.32385	0.167604				17.5	75.852	0.5459	4.95057				63.772	6.924	0.791186	0.355603				106.977	10.609	1.32721	0.544858					16.392	1.552	0.949182	0.274195				12.573	44.731	0.728042	7.90271
			45.404	2.789	1.41634	0.182027				16.587	56.061	0.517419	3.65889				86.205	9.072	1.0695	0.46592				33.93	96.021	0.420952	4.93145					11.839	21.217	0.685539	3.74845				9.42	18.339	0.545467	3.23998
			30.191	2.756	0.941786	0.179874				13.012	71.414	0.4059	4.66092				66.764	8.342	0.828306	0.428429				104.81	9.511	1.30032	0.488467					9.419	28.189	0.545409	4.9802				12.926	22.22	0.748482	3.92565
			42.764	2.573	1.33399	0.16793				10.716	13.977	0.334278	0.912226				61.078	8.743	0.757763	0.449024				39.598	133.812	0.491272	6.87233					15.306	1.077	0.886297	0.190276				12.537	36.235	0.725957	6.4017
			29.516	3.467	0.92073	0.226278				79.183	1.172	2.47006	0.076492				58.436	8.353	0.724985	0.428994				33.195	126.387	0.411833	6.49099					11.123	29.65	0.644079	5.23832				12.999	33.882	0.752709	5.986
			67.809	2.438	2.11525	0.159119				7.506	28.891	0.234144	1.88561				81.469	7.904	1.01074	0.405934				33.617	117.594	0.417068	6.0394					9.347	26.134	0.54124	4.61714				11.532	20.464	0.667763	3.61541
			45.705	3.102	1.42573	0.202456				9.191	21.989	0.286707	1.43514				64.73	8.353	0.803071	0.428994				34.691	124.881	0.430393	6.41365					23.623	1.397	1.36789	0.246811				16.957	62.8	0.981898	11.095
			25.923	2.767	0.808649	0.180592				11.414	44.663	0.356051	2.91499				70.111	8.197	0.86983	0.420982				35.214	120.871	0.436882	6.2077					10.057	0.831	0.582352	0.146814				60.511	0.64	3.5039	0.11307
			58.359	2.548	1.82047	0.166298				11.837	37.325	0.369247	2.43606				69.269	9.836	0.859384	0.505158				14.262	13.893	0.176941	0.713518					69.485	0.459	4.02354	0.0810924				11.558	32.994	0.669268	5.82911
			31.533	2.636	0.983649	0.172042				8.306	29.219	0.2591	1.90701				50.667	7.631	0.628599	0.391913				22.345	92.136	0.277223	4.73193					5.868	12.908	0.339788	2.28048				8.361	42.03	0.484145	7.42552
			25.177	2.892	0.785378	0.18875				18.365	35.787	0.572883	2.33568				62.118	8.584	0.770665	0.440858				24.624	107.322	0.305497	5.51185					33.016	0.517	1.9118	0.0913393				13.528	46.249	0.783341	8.1709
			39.184	2.654	1.22232	0.173217				10.539	25.435	0.328756	1.66005				59.517	7.504	0.738396	0.385391				29.536	106.617	0.366438	5.47564					10.028	11.743	0.580673	2.07466				16.757	43.311	0.970317	7.65183
			31.186	2.38	0.972825	0.155334				15.959	19.531	0.497829	1.27471				93.688	7.687	1.16234	0.39479				29.359	126.154	0.364242	6.47903					19.806	0.571	1.14687	0.10088				11.092	44.962	0.642284	7.94352
			46.731	2.428	1.45774	0.158466				9.511	34.993	0.296689	2.28386				61.748	8.011	0.766075	0.41143				32.309	124.581	0.400841	6.39824					36.589	0.542	2.11869	0.0957561				15.461	57.226	0.895272	10.1102
			63.701	2.782	1.98711	0.181571				8.529	42.914	0.266056	2.80083				72.418	8.356	0.898452	0.429148				32.869	115.78	0.407788	5.94624					34.102	0.519	1.97468	0.0916927				13.003	30.411	0.752941	5.37277
			68.608	3.016	2.14018	0.196843				14.462	60.14	0.451132	3.92511				64.951	8.058	0.805813	0.413843				24.573	101.325	0.304864	5.20386					25.173	0.579	1.45765	0.102293				11.065	57.559	0.640721	10.1691
			40.26	3.322	1.25588	0.216814				14.574	57.078	0.454625	3.72527				58.044	8.508	0.720121	0.436955				43.593	114.895	0.540836	5.90079					11.27	8.947	0.652591	1.58068				14.078	52.445	0.815189	9.26555
			70.1	2.423	2.18672	0.15814				15.593	54.165	0.486412	3.53514				55.031	8.391	0.682741	0.430946				145.857	8.274	1.80957	0.424937					35.68	0.548	2.06606	0.0968162				12.185	52.302	0.705575	9.24029
			50.916	2.855	1.58829	0.186335				20.425	88.491	0.637143	5.77547				53.089	9.646	0.658647	0.4954				23.092	90.813	0.28649	4.66398					8.226	2.16	0.476328	0.381611				10.802	57.433	0.625492	10.1468
			48.372	2.65	1.50893	0.172955				11.834	37.353	0.369153	2.43789				47.559	7.757	0.59004	0.398385				26.801	94.777	0.332506	4.86756					24.078	0.439	1.39424	0.0775589				18.742	58.344	1.08526	10.3077
			36.227	2.194	1.13007	0.143194				8.2	38.454	0.255793	2.50975				92.073	7.995	1.1423	0.410608				149.11	9.47	1.84993	0.486361					27.324	0.604	1.5822	0.10671				11.072	61.407	0.641126	10.8489
			73.792	2.589	2.30189	0.168974				14.27	75.842	0.445142	4.94992				68.961	8.235	0.855563	0.422934				23.15	67.432	0.28721	3.46318					26.929	0.595	1.55933	0.10512				13.722	58.292	0.794575	10.2986
			66.417	2.569	2.07183	0.167669				10.712	55.931	0.334153	3.6504				93.987	9.242	1.16605	0.474651				17.918	56.594	0.222299	2.90656					14.325	0.658	0.829492	0.11625				10.931	57.075	0.632962	10.0835
			28.782	2.708	0.897834	0.176741				10.406	25.402	0.324608	1.65789				105.467	12.096	1.30847	0.621227				37.722	167.815	0.467997	8.61866					24.027	0.48	1.39129	0.0848025				16.44	55.403	0.951961	9.78815
			46.686	2.314	1.45634	0.151026				19.663	73.627	0.613373	4.80536				101.14	9.583	1.25479	0.492164				48.945	181.385	0.607235	9.31558					39.943	0.533	2.31291	0.0941661				9.515	62.322	0.550968	11.0105
			10.002	2.664	0.312005	0.173869				8.842	34.714	0.27582	2.26565				49.073	9.147	0.608823	0.469772				45.437	171.425	0.563713	8.80406					36.761	0.571	2.12865	0.10088				10.441	56.323	0.604588	9.95069
			44.033	2.255	1.37358	0.147175				12.559	67.646	0.391769	4.415				81.291	9.554	1.00853	0.490675				44.698	140.231	0.554545	7.20199					25.685	0.469	1.48729	0.0828591				11.034	56.974	0.638926	10.0657
			72.298	2.415	2.25528	0.157618				5.22	10.697	0.162834	0.698153				75.581	8.197	0.937694	0.420982				43.206	123.367	0.536034	6.33589					39.193	0.54	2.26948	0.0954028				14.795	60.003	0.856707	10.6008
			29.35	2.097	0.915552	0.136863				16.699	72.404	0.520913	4.72554				77.666	10.111	0.963561	0.519282				38.32	132.474	0.475416	6.80361					16.601	0.636	0.961284	0.112363				10.663	28.835	0.617443	5.09433
			9.918	2.726	0.309385	0.177916				13.664	55.906	0.426239	3.64877				74.513	9.12	0.924444	0.468386				22.215	122.912	0.27561	6.31252					17.905	0.69	1.03679	0.121904				11.835	56.945	0.685308	10.0606
			63.819	2.39	1.99079	0.155986				16.972	64.067	0.529429	4.18141				88.544	9.341	1.09852	0.479736				32.059	153.436	0.397739	7.88018					38.856	0.557	2.24996	0.0984062				14.409	62.946	0.834356	11.1208
			24.785	1.763	0.77315	0.115064				62.359	1.613	1.94524	0.105274				49.994	14.074	0.620249	0.722814				40.197	158.695	0.498703	8.15027					11.794	10.987	0.682934	1.94109				9.623	54.934	0.557222	9.70529
			59.001	2.601	1.84049	0.169757				23.31	8.351	0.727139	0.545038				49.084	6.493	0.608959	0.333468				32.332	115.066	0.401126	5.90957					6.711	42.566	0.388602	7.52021				14.398	54.223	0.833719	9.57968
			26.618	2.858	0.830329	0.186531				52.424	1.112	1.63533	0.072576				72.06	10.098	0.894011	0.518614				49.075	121.421	0.608848	6.23595					34.71	0.637	2.00989	0.11254				11.48	53.28	0.664751	9.41308
			75.45	2.926	2.35361	0.190969				25.071	8.263	0.782072	0.539295				57.4	13.001	0.712132	0.667706				31.386	106.495	0.38939	5.46938					34.317	0.634	1.98713	0.11201				16.927	56.991	0.980161	10.0687
			19.776	2.595	0.616898	0.169366				55.122	1.596	1.71949	0.104165				54.337	7.87	0.674131	0.404188				39.603	85.254	0.491334	4.37848					38.826	0.679	2.24823	0.11996				12.194	39.039	0.706096	6.89709
			55.015	2.78	1.71615	0.18144				12.743	67.606	0.397509	4.41239				65.661	12.428	0.814622	0.638278				34.897	169.96	0.432949	8.72882					48.681	0.542	2.81888	0.0957561				15.441	57.979	0.894114	10.2433
			43.696	2.724	1.36307	0.177785				36.413	1.718	1.13588	0.112127				90.078	9.247	1.11755	0.474908				44.051	175.696	0.546518	9.02341					22.192	0.65	1.28503	0.114837				10.234	60.216	0.592602	10.6385
			69.903	2.869	2.18057	0.187249				37.878	1.687	1.18158	0.110104				51.763	8.718	0.642196	0.44774				40.262	153.553	0.49951	7.88619					36.27	0.479	2.10022	0.0846258				12.886	61.795	0.746166	10.9174
			38.857	2.451	1.21212	0.159967				32.59	4.338	1.01662	0.283125				65.176	9.77	0.808604	0.501768				22.567	38.395	0.279977	1.97189					10.331	13.058	0.598218	2.30698				16.397	56.017	0.949471	9.89663
			26.835	4.024	0.837098	0.262631				25.412	2.862	0.792709	0.186792				64.678	12.2	0.802426	0.626569				49.37	188.413	0.612508	9.67653					31.084	0.618	1.79992	0.109183				12.154	54.332	0.70378	9.59893
			60.834	2.64	1.89767	0.172303				73.354	1.661	2.28822	0.108407				77.428	9.314	0.960609	0.478349				42.955	145.392	0.53292	7.46705					40.937	0.393	2.37046	0.069432				13.176	61.422	0.762959	10.8515
			56.473	2.568	1.76163	0.167604				12.049	70.839	0.37586	4.62339				80.245	9.333	0.995558	0.479325				44.263	174.696	0.549148	8.97205					24.517	0.582	1.41966	0.102823				51.991	0.533	3.01055	0.0941661
			38.757	2.864	1.209	0.186922				69.491	1.806	2.16772	0.117871				55.227	9.157	0.685172	0.470286				53.684	193.995	0.666029	9.96321					34.584	0.468	2.00259	0.0826824				17.978	57.799	1.04102	10.2115
			38.368	2.39	1.19686	0.155986				36.085	1.365	1.12565	0.0890884				101.604	8.378	1.26055	0.430278				17.814	38.047	0.221009	1.95402					35.351	0.779	2.04701	0.137627				15.518	96.695	0.898573	17.0833
			45.879	2.617	1.43116	0.170802				51.405	1.806	1.60354	0.117871				57.742	9.933	0.716375	0.51014				45.336	67.152	0.56246	3.4488					18.267	0.477	1.05775	0.0842725				40.957	0.468	2.37162	0.0826824
			12.598	69.584	0.392985	4.54148				79.755	1.768	2.4879	0.115391				70.487	9.08	0.874495	0.466331				24.594	120.342	0.305125	6.18053					24.005	0.509	1.39001	0.089926				44.983	0.469	2.60475	0.0828591
			79.676	3.082	2.48543	0.20115				13.474	60.022	0.420312	3.91741				76.203	9.382	0.945411	0.481841				40.863	127.668	0.506966	6.55678					6.545	17.872	0.378989	3.15748				12.814	46.992	0.741997	8.30216
			61.898	3.027	1.93086	0.197561				10.94	29.806	0.341265	1.94532				69.202	8.438	0.858553	0.433359				40.002	123.325	0.496284	6.33373					36.208	0.582	2.09663	0.102823				13.104	42.872	0.75879	7.57428
			5.595	10.905	0.174532	0.711728				32.444	1.305	1.01207	0.0851724				98.978	10.518	1.22797	0.540184				30.574	137.898	0.379316	7.08218					29.77	0.479	1.72384	0.0846258				11.355	48.043	0.657513	8.48785
			17.45	16.747	0.54434	1.09301				37.926	4.37	1.18307	0.285213				61.392	9.708	0.761658	0.498584				10.019	40.616	0.1243	2.08596					2.04	0.206	0.118127	0.0363944				9.648	22.982	0.558669	4.06027
			12.849	63.162	0.400815	4.12234				15.275	46.226	0.476493	3.017				98.595	10.321	1.22322	0.530067				38.326	155.285	0.475491	7.97514					35.127	0.573	2.03404	0.101233				73.419	0.495	4.25134	0.0874526
			31.189	0.878	0.972918	0.0573037				59.068	1.854	1.84258	0.121004				104.269	9.842	1.29361	0.505466				15.209	24.624	0.18869	1.26464					19.026	0.458	1.1017	0.0809157				50.324	0.459	2.91402	0.0810924
			30.004	1.021	0.935953	0.0666368				38.085	3.436	1.18803	0.224255				63.974	8.053	0.793692	0.413587				37.283	142.206	0.462551	7.30343					30.94	0.638	1.79159	0.112717				12.898	58.629	0.746861	10.3581
			17.65	5.778	0.550579	0.377108				57.714	1.701	1.80035	0.111018				116.157	9.144	1.4411	0.469618				44.443	67.304	0.551381	3.4566					9.745	0.804	0.564286	0.142044				14.844	59.961	0.859545	10.5934
			14.37	6.909	0.448262	0.450924				45.819	1.896	1.42929	0.123745				85.416	9.1	1.05971	0.467359				40.619	168.062	0.503939	8.63134					28.427	0.607	1.64607	0.10724				12.594	50.206	0.729258	8.86999
			6.442	12.617	0.200954	0.823464				17.575	45.955	0.548239	2.99931				55.078	12.864	0.683324	0.66067				93.51	140.203	1.16013	7.20056					23.311	0.595	1.34983	0.10512				11.487	39.576	0.665157	6.99196
			12.995	26.849	0.40537	1.75233				77.118	1.801	2.40564	0.117544				62.153	8.748	0.7711	0.44928				42.817	142.216	0.531208	7.30394					23.301	0.441	1.34925	0.0779123				9.347	49.423	0.54124	8.73165
			11.557	33.369	0.360512	2.17787				45.252	1.255	1.4116	0.0819091				64.361	8.771	0.798493	0.450462				64.19	136.642	0.796372	7.01767					5.99	3.213	0.346852	0.567647				10.888	59.477	0.630472	10.5079
			16.626	1.009	0.518636	0.0658536				58.38	1.889	1.82112	0.123288				97.609	9.55	1.21098	0.49047				41.769	164.585	0.518206	8.45277					10.735	31.645	0.621612	5.59078				14.194	55.784	0.821906	9.85546
			8.393	12.197	0.261814	0.796052				17.673	46.772	0.551296	3.05263				94.054	9.411	1.16688	0.483331				43.274	137.749	0.536878	7.07452					26.221	0.519	1.51833	0.0916927				5.989	38.554	0.346794	6.81141
			6.9	6.453	0.21524	0.421163				59.504	1.598	1.85618	0.104295				123.328	16.334	1.53007	0.838883				33.082	133.251	0.410431	6.84352					2.377	12.462	0.137641	2.20168				9.881	42.846	0.572161	7.56968
			12.101	24.864	0.377482	1.62278				16.177	53.556	0.50463	3.4954				76.943	12.773	0.954591	0.655997				35.076	97.349	0.43517	4.99966					17.463	0.698	1.0112	0.123317				9.374	48.082	0.542803	8.49474
			6.271	9.4	0.195619	0.613502				15.003	63.364	0.468008	4.13553				28.901	17.951	0.35856	0.921929				46.735	158.654	0.579817	8.14816					33.697	0.968	1.95123	0.171018				12.717	43.077	0.73638	7.61049
			8.925	3.754	0.278409	0.245009				12.236	55.466	0.381693	3.62006				53.621	12.635	0.665248	0.648909				41.31	127.919	0.512512	6.56967					7.703	4.622	0.446044	0.816577				16.552	57.774	0.958447	10.207
			6.986	3.102	0.217923	0.202456				16.634	56.735	0.518886	3.70288				86.823	27.701	1.07717	1.42267				28.447	103.149	0.352927	5.29753					26.85	0.481	1.55475	0.0849792				8.124	51.21	0.470422	9.04737
			6.556	9.546	0.20451	0.623031				12.336	44.715	0.384813	2.91838				91.156	14.328	1.13092	0.735859				36.466	119.721	0.452415	6.14864					12.389	14.403	0.717387	2.5446				9.623	49.839	0.557222	8.80515
			11.074	21.129	0.345445	1.37901				11.76	40.56	0.366845	2.6472				43.489	13.728	0.539545	0.705044				25.422	110.968	0.315397	5.6991					15.722	0.669	0.910385	0.118193				10.935	46.088	0.633193	8.14245
			9.915	7.156	0.309291	0.467045				30.163	27.241	0.940913	1.77792				87.036	17.914	1.07981	0.920029				21.039	98.674	0.26102	5.06771					4.745	33.343	0.27476	5.89077				10.551	40.278	0.610958	7.11599
			9.308	21.735	0.290356	1.41856				20.631	38.645	0.643569	2.52221				71.927	15.856	0.892361	0.814334				42.249	141.702	0.524161	7.27754					9.968	11.7	0.577199	2.06706				40.011	0.504	2.31684	0.0890426
			6.858	2.049	0.21393	0.13373				18.097	55.367	0.564523	3.61359				91.491	16.796	1.13508	0.86261				29.845	151.505	0.370271	7.78101					33.085	0.839	1.91579	0.148228				13.884	58.024	0.803956	10.2512
			10.802	7.448	0.336961	0.486103				15.462	64.555	0.482326	4.21326				72.717	19.557	0.902162	1.00441				36.355	173.167	0.451037	8.89352					21.661	0.507	1.25428	0.0895726				16.082	66.631	0.931231	11.7718
			5.718	4.636	0.178369	0.302574				15.412	59.233	0.480766	3.86591				111.539	26.817	1.38381	1.37727				47.234	181.283	0.586007	9.31035					30.585	0.57	1.77103	0.100703				11.177	49.752	0.647206	8.78978
			8.765	27.731	0.273418	1.8099				15.402	31.792	0.480454	2.07494				59.598	15.826	0.739401	0.812793				48.362	168.057	0.600002	8.63108					15.577	0.953	0.901989	0.168368				13.17	57.678	0.762611	10.1901
			8.325	10.251	0.259692	0.669044				8.35	45.849	0.260472	2.99239				53.39	15.575	0.662382	0.799902				44.087	127.252	0.546964	6.53542					19.296	0.55	1.11734	0.0971695				60.73	0.819	3.51658	0.144694
			7.456	6.594	0.232585	0.430365				13.042	68.788	0.406836	4.48953				100.802	18.055	1.2506	0.92727				59.313	179.661	0.735865	9.22704					24.543	0.896	1.42117	0.158298				9.676	59.82	0.560291	10.5685
			15.327	29.878	0.478115	1.95002				13.399	46.312	0.417972	3.02261				96.2	25.16	1.1935	1.29217				51.732	174.236	0.641812	8.94843					27.988	0.719	1.62065	0.127027				7.821	54.951	0.452876	9.70829
			11.292	30.34	0.352246	1.98018				15.884	46.286	0.49549	3.02091				63.702	15.523	0.790317	0.797231				37.219	153.865	0.461757	7.90221					13.146	15.676	0.761222	2.76951				47.595	0.48	2.756	0.0848025
			6.927	6.107	0.216083	0.398581				14.84	53.418	0.462923	3.48639				107.091	18.3	1.32862	0.939853				48.193	130.851	0.597905	6.72026					7.789	13.321	0.451023	2.35345				14.064	49.311	0.814378	8.71187
			9.34	21.421	0.291355	1.39807				14.652	62.563	0.457059	4.08325				88.76	15.56	1.1012	0.799132				35.636	212.192	0.442117	10.8978					7.532	3.827	0.436142	0.676123				44.215	0.576	2.56028	0.101763
			6.48	7.911	0.202139	0.516321				16.128	60.336	0.503101	3.9379				123.296	20.382	1.52967	1.04678				39.123	201.36	0.485379	10.3415					9.13	12.458	0.528674	2.20098				12.146	49.975	0.703316	8.82918
			7.641	7.147	0.238355	0.466458				13.645	48.116	0.425646	3.14035				97.34	14.936	1.20765	0.767084				85.778	11.593	1.0642	0.595394					5.885	24.138	0.340772	4.2645				11.817	55.068	0.684266	9.72897
			9.76	13.591	0.304456	0.887033				12.903	66.203	0.4025	4.32082				115.759	16.195	1.43616	0.831744				83.107	11.999	1.03106	0.616246					3.702	15.171	0.214365	2.68029				6.937	39.553	0.401688	6.9879
			7.283	2.591	0.227188	0.169105				17.036	72.379	0.531426	4.7239				73.329	17.749	0.909754	0.911555				36.601	189.229	0.454089	9.71844					7.45	8.003	0.431394	1.4139				13.509	54.744	0.782241	9.67172
			11.45	22.486	0.357174	1.46758				12.078	47.589	0.376764	3.10595				131.547	17.849	1.63203	0.91669				43.09	145.135	0.534595	7.45385					12.056	34.91	0.698105	6.16761				5.47	24.618	0.316741	4.34931
			12.22	12.62	0.381194	0.82366				19.551	77.892	0.609879	5.08372				51.873	19.459	0.643561	0.999377				82.696	10.524	1.02597	0.540492					7.68	7.186	0.444712	1.26956				7.207	29.985	0.417323	5.29751
			8.922	13.212	0.278315	0.862297				10.056	33.241	0.31369	2.16951				69.857	36.821	0.866679	1.89106				55.868	12.86	0.693125	0.660465					7.207	7.792	0.417323	1.37663				11.203	54.079	0.648712	9.55424
			8.479	1.96	0.264496	0.127922				14.736	50.697	0.459679	3.3088				74.454	16.996	0.923712	0.872882				48.919	158.504	0.606912	8.14046					9.013	20.993	0.521899	3.70887				7.225	14.611	0.418365	2.58135
			8.644	1.962	0.269643	0.128052				18.481	28.716	0.576501	1.87418				55.372	21.716	0.686971	1.11529				41.137	174.871	0.510365	8.98104					8.365	19.618	0.484377	3.46595				10.928	43.49	0.632788	7.68346
			8.323	22.042	0.25963	1.4386				17.319	62.477	0.540254	4.07764				115.507	16.626	1.43303	0.853879				38.333	155.434	0.475577	7.98279					77.557	0.516	4.49095	0.0911627				11.203	50.547	0.648712	8.93023
			15.191	43.376	0.473872	2.83099				14.472	80.328	0.451444	5.2427				55.093	34.968	0.68351	1.79589				41.207	179.306	0.511234	9.20881					53.465	0.506	3.0959	0.089396				5.712	8.575	0.330754	1.51496
			8.554	1.366	0.266836	0.0891537				9.141	36.841	0.285147	2.40447				94.565	18.653	1.17322	0.957982				44.348	203.855	0.550202	10.4696					38.41	0.479	2.22414	0.0846258				9.941	29.717	0.575635	5.25016
			15.423	49.147	0.481109	3.20764				9.457	32.656	0.295004	2.13133				57.911	37.329	0.718471	1.91715				42.321	196.916	0.525054	10.1132					10.422	27.143	0.603488	4.7954				7.019	28.35	0.406436	5.00865
			7.151	21.488	0.22307	1.40244				8.267	28.698	0.257883	1.87301				65.11	15.669	0.807786	0.80473				43.983	185.438	0.545674	9.52374					9.96	26.925	0.576736	4.75689				11.244	34.684	0.651086	6.12769
			11.158	1.505	0.348066	0.0982257				9.002	30.719	0.280811	2.00491				129.158	17.075	1.6024	0.876939				50.847	127.963	0.630832	6.57193					16.579	0.45	0.96001	0.0795023				1.163	1.163	0.0673437	0.205469
			9.294	42.831	0.28992	2.79542				18.495	58.181	0.576938	3.79725				90.611	18.135	1.12416	0.931379				34.943	168.4	0.433519	8.6487					28.333	0.663	1.64063	0.117133				11.763	32.012	0.681139	5.65562
			15.536	1.748	0.484634	0.114085				27.844	4.127	0.868573	0.269354				84.415	43.824	1.04729	2.25072				39.483	142.987	0.489845	7.34354					19.34	0.909	1.11989	0.160595				3.531	14.273	0.204463	2.52164
			49.617	1.583	1.54777	0.103316				20.47	55.894	0.638547	3.64799				64.615	31.99	0.801644	1.64294				33.612	167.433	0.417006	8.59904					7.926	21.339	0.458956	3.77				51.769	1.082	2.99769	0.191159
			10.788	3.011	0.336524	0.196517				10.183	37.972	0.317651	2.47829				80.302	17.27	0.996265	0.886954				35.424	153.957	0.439487	7.90694					9.747	45.896	0.564402	8.10853				13.336	34.989	0.772224	6.18157
			31.619	1.72	0.986332	0.112258				14.223	38.484	0.443676	2.51171				51.172	20.014	0.634864	1.02788				36.731	169.141	0.455702	8.68676					19.448	1.078	1.12614	0.190452				9.698	19.92	0.561564	3.5193
			36.195	1.902	1.12908	0.124136				9.715	33.387	0.303052	2.17904				100.237	34.559	1.24359	1.77488				47.466	207.619	0.588886	10.6629					17.784	0.503	1.02979	0.0888659				30.32	0.742	1.75569	0.131091
			4.616	7.139	0.143993	0.465936				15.782	55.219	0.492308	3.60394				109.628	17.112	1.3601	0.878839				51.88	196.478	0.643648	10.0907					17.205	6.583	0.996259	1.16303				25.589	0.633	1.48174	0.111833
			12.011	1.645	0.374674	0.107363				18.749	49.001	0.584861	3.19811				121.633	16.73	1.50904	0.859221				40.959	192.85	0.508157	9.90441					16.633	49.225	0.963137	8.69667				2.839	28.657	0.164393	5.06289
			13.012	5.179	0.4059	0.338014				15.295	60.59	0.477116	3.95448				82.597	16.413	1.02474	0.84294				47.408	203.3	0.588166	10.4411					12.036	4.568	0.696947	0.807037				7.981	27.951	0.462141	4.93815
			13.578	25.001	0.423556	1.63172				17.509	49.728	0.546181	3.24556				93.806	20.21	1.1638	1.03795				45.543	176.518	0.565028	9.06563					28.662	0.572	1.65968	0.101056				11.872	1.149	0.68745	0.202996
			30.369	1.926	0.947339	0.125703				11.161	63.527	0.348159	4.14617				75.806	16.869	0.940485	0.866359				39.675	182.643	0.492227	9.38019					14.234	6.387	0.824222	1.1284				2.523	25.863	0.146095	4.56926
			26.622	2.226	0.830454	0.145283				10.589	57.558	0.330316	3.75659				117.685	29.098	1.46006	1.49442				46.529	172.625	0.577261	8.86569					22.471	0.45	1.30119	0.0795023				8.224	32.107	0.476212	5.6724
			10.737	44.084	0.334933	2.8772				9.953	42.092	0.310477	2.74719				88.161	16.882	1.09377	0.867027				153.965	16.901	1.91016	0.868003					56.145	0.654	3.25109	0.115543				11.357	11.889	0.657629	2.10045
			37.98	1.821	1.18476	0.11885				6.436	26.987	0.200766	1.76134				204.518	19.561	2.53735	1.00462				104.793	16.622	1.30011	0.853674					30.377	0.68	1.75899	0.120137				61.557	0.828	3.56447	0.146284
			31.746	1.764	0.990293	0.11513				11.997	59.146	0.374238	3.86024				90.877	17.121	1.12746	0.879302				46.323	188.32	0.574705	9.67175					37.49	0.634	2.17087	0.11201				7.811	8.205	0.452297	1.44959
			10.463	23.616	0.326386	1.54133				5.554	26.565	0.173253	1.7338				89.394	19.749	1.10906	1.01427				42.329	187.651	0.525154	9.63739					48.105	0.645	2.78553	0.113953				66.087	0.769	3.82678	0.135861
			31.596	1.907	0.985614	0.124463				13.561	57.414	0.423026	3.74719				63.837	16.3	0.791992	0.837137				38.428	146.409	0.476756	7.51928					25.002	0.711	1.44775	0.125614				49.169	0.476	2.84714	0.0840958
			56.97	3.618	1.77714	0.236133				14.359	74.943	0.447919	4.89125				89.466	18.334	1.10996	0.941599				44.685	186.453	0.554383	9.57587					43.476	0.716	2.51749	0.126497				8.509	7.871	0.492715	1.39058
			10.497	24.158	0.327446	1.5767				11.61	48.824	0.362166	3.18656				77.198	19.893	0.957755	1.02167				37.702	173.93	0.467749	8.93271					44.453	0.804	2.57406	0.142044				36.542	0.698	2.11597	0.123317
			44.613	1.893	1.39167	0.123549				17.121	80.414	0.534077	5.24832				76.439	17.721	0.948339	0.910116				41.39	184.543	0.513504	9.47777					13.578	38.221	0.786237	6.75257				65.714	0.72	3.80518	0.127204
			8.207	49.821	0.256011	3.25163				15.048	70.191	0.469411	4.5811				86.489	51.024	1.07302	2.62049				113.69	16.101	1.41049	0.826916					7.315	19.285	0.423576	3.40712				9.921	15.389	0.574477	2.7188
			26.776	27.854	0.835258	1.81793				15.818	63.028	0.493431	4.1136				87.115	16.852	1.08079	0.865486				136.148	15.052	1.68912	0.773042					14.915	6.018	0.863656	1.06321				10.168	15.885	0.58878	2.80643
			35.102	2.184	1.09498	0.142541				17.753	51.511	0.553792	3.36193				108.856	17.326	1.35052	0.88983				104.889	16.411	1.3013	0.842837					36.6	0.597	2.11933	0.105473				88.223	0.737	5.10857	0.130207
			16.724	32.793	0.521693	2.14028				6.299	28.098	0.196493	1.83385				106.565	18.219	1.3221	0.935693				136.471	13.476	1.69312	0.692101					21.12	3.089	1.22296	0.545739				12.05	9.78	0.697757	1.72785
			18.439	32.996	0.575191	2.15352				15.27	49.325	0.476337	3.21926				98.063	52.644	1.21662	2.70369				37.418	159.42	0.464226	8.1875					25.025	1.178	1.44908	0.208119				59.559	0.781	3.44877	0.137981
			29.301	1.562	0.914023	0.101946				7.645	34.305	0.23848	2.23896				69.626	17.539	0.863813	0.900769				69.051	40.795	0.85668	2.09515					13.045	4.331	0.755373	0.765166				12.787	13.422	0.740434	2.37129
			23.649	2.363	0.737713	0.154224				14.507	64.845	0.452535	4.23219				139.067	16.519	1.72533	0.848384				61.003	38.125	0.756832	1.95803					28.155	1.282	1.63032	0.226493				90.842	0.983	5.26022	0.173668
			56.479	1.833	1.76182	0.119633				15.276	89.869	0.476524	5.86541				99.237	15.938	1.23118	0.818545				169.508	17.753	2.103	0.91176					13.096	40.061	0.758326	7.07765				92.728	0.985	5.36943	0.174022
			58.52	1.72	1.82549	0.112258				17.435	69.436	0.543872	4.53183				123.031	17.205	1.52638	0.883616				44.621	173.354	0.553589	8.90313					13.564	27.154	0.785426	4.79735				12.409	14.374	0.718545	2.53948
			60.167	1.896	1.87687	0.123745				6.023	31.596	0.187883	2.06215				92.284	15.611	1.14492	0.801751				52.866	183.156	0.655881	9.40654					18.042	22.462	1.04473	3.9684				10.202	27.524	0.590749	4.86272
			56.606	1.553	1.76578	0.101358				16.478	74.127	0.514019	4.83799				150.901	17.364	1.87215	0.891782				136.07	18.168	1.68815	0.933074					29.246	13.328	1.69349	2.35468				45.723	0.624	2.6476	0.110243
			24.966	48.232	0.778796	3.14792				15.802	74.674	0.492932	4.87369				93.498	20.181	1.15998	1.03646				132.702	15.199	1.64636	0.780591					16.056	47.71	0.929726	8.42901				12.125	55.775	0.7021	9.85387
			42.539	3.781	1.32697	0.246772				19.575	97.328	0.610628	6.35223				51.153	16.736	0.634628	0.859529				86.148	12.308	1.06879	0.632115					16.81	83.035	0.973386	14.6699				21.999	27.286	1.27386	4.82067
			35.762	10.495	1.11557	0.684969				10.585	55.739	0.330191	3.63787				131.556	21.991	1.63215	1.12942				31.858	150.981	0.395246	7.75409					17.695	20.228	1.02463	3.57372				11.89	25.17	0.688493	4.44683
			42.559	1.566	1.3276	0.102207				15.032	56.151	0.468912	3.66476				108.773	18.466	1.34949	0.948378				109.069	16.151	1.35316	0.829484					15.777	81.919	0.91357	14.4728				58.154	0.541	3.36742	0.0955795
			28.218	7.827	0.88024	0.510839				2.533	10.068	0.0790151	0.6571				94.919	26.32	1.17761	1.35174				24.821	104.213	0.307941	5.35218					17.599	11.095	1.01907	1.96017				55.86	0.613	3.23458	0.1083
			78.823	1.866	2.45883	0.121787				5.597	18.67	0.174594	1.21852				119.614	16.398	1.48399	0.84217				105.879	16.772	1.31359	0.861378					15.807	10.366	0.915307	1.83138				45.57	0.653	2.63874	0.115367
			11.516	17.947	0.359233	1.17133				20.265	94.995	0.632152	6.19996				67.204	29.451	0.833765	1.51255				17.618	93.345	0.218577	4.79402					14.967	60.185	0.866667	10.633				50.871	0.971	2.94569	0.171548
			9.962	40.82	0.310757	2.66417				5.305	21.922	0.165486	1.43077				121.506	18.15	1.50746	0.932149				19.646	78.305	0.243738	4.02159					18.251	81.115	1.05683	14.3307				10.591	23.52	0.613274	4.15532
			12.775	12.16	0.398507	0.793637				4.845	12.255	0.151136	0.799837				128.188	18.783	1.59036	0.964659				21.568	116.858	0.267583	6.0016					7.078	4.088	0.409853	0.722234				33.65	1.05	1.94851	0.185505
			41.462	1.835	1.29338	0.119764				13.682	65.268	0.4268	4.2598				84.882	13.672	1.05309	0.702168				16.275	66.2	0.201915	3.3999					39.058	0.551	2.26166	0.0973462				33.077	0.878	1.91533	0.155118
			13.153	2.306	0.410298	0.150504				13.241	53.377	0.413043	3.48371				94.8	28.007	1.17613	1.43839				16.399	91.243	0.203454	4.68607					18.086	0.671	1.04727	0.118547				42.661	0.671	2.47029	0.118547
			9.126	5.11	0.284679	0.33351				19.945	71.361	0.62217	4.65746				93.305	16.193	1.15759	0.831641				17.444	99.539	0.216419	5.11213					22.42	0.546	1.29823	0.0964628				30.108	0.867	1.74341	0.153174
			55.161	3.857	1.72071	0.251732				16.187	69.611	0.504942	4.54325				69.39	22.736	0.860885	1.16768				21.392	71.949	0.265399	3.69516					9.185	0.84	0.531859	0.148404				55.957	0.765	3.2402	0.135154
			26.207	4.078	0.817508	0.266156				16.399	60.406	0.511555	3.94247				100.182	14.066	1.24291	0.722403				32.469	128.406	0.402826	6.59469					58.271	0.52	3.37419	0.0918694				36.495	0.735	2.11325	0.129854
			14.841	2.071	0.462954	0.135166				9.143	54.04	0.285209	3.52699				103.905	16.716	1.28909	0.858502				26.223	90.192	0.325335	4.63209					40.396	0.597	2.33914	0.105473				14.243	59.92	0.824744	10.5862
			12.111	3.794	0.377794	0.24762				20.693	77.608	0.645503	5.06518				91.252	19.102	1.13212	0.981042				25.38	94.74	0.314876	4.86566					4.595	3.242	0.266074	0.57277				51.378	0.751	2.97505	0.132681
			33.586	1.802	1.04769	0.11761				18.759	82.301	0.585173	5.37147				92.274	17.983	1.1448	0.923572				19.042	93.176	0.236244	4.78534					59.341	0.542	3.43615	0.0957561				11.354	33.498	0.657455	5.91815
			30.601	1.912	0.954576	0.124789				21.005	68.175	0.655236	4.44952				101.647	35.552	1.26108	1.82588				32.865	114.29	0.407739	5.86971					43.491	0.491	2.51835	0.0867459				41.307	0.706	2.39189	0.12473
			14.502	3.769	0.452379	0.245988				17.883	78.911	0.557847	5.15022				91.949	20.106	1.14076	1.03261				26.764	101.968	0.332047	5.23688					15.198	0.878	0.880043	0.155118				56.358	0.643	3.26342	0.1136
			31.304	2.174	0.976506	0.141889				18.452	79.343	0.575597	5.17842				88.994	13.409	1.1041	0.68866				25.634	92.315	0.318028	4.74112					60.627	0.591	3.51062	0.104413				49.43	0.983	2.86225	0.173668
			13.75	3.183	0.428921	0.207742				19.074	83.132	0.595	5.42571				81.775	31.057	1.01454	1.59503				28.727	95.298	0.356401	4.89432					73.784	0.699	4.27248	0.123494				52.514	0.619	3.04083	0.10936
			28.378	2.102	0.885231	0.13719				21.145	89.716	0.659603	5.85542				104.461	15.344	1.29599	0.788038				25.541	93.625	0.316874	4.8084					11.196	1.118	0.648306	0.197519				76.721	0.729	4.44254	0.128794
			10.849	2.343	0.338427	0.152919				9.743	43.898	0.303926	2.86506				102.168	13.464	1.26754	0.691485				32.931	93.688	0.408558	4.81164					58.27	0.547	3.37413	0.0966395				10.328	39.915	0.598045	7.05186
			32.988	2.242	1.02904	0.146327				14.618	46.445	0.455998	3.03129				81.454	24.638	1.01056	1.26536				34.628	107.74	0.429611	5.53332					36.959	0.644	2.14012	0.113777				63.844	0.682	3.6969	0.12049
			12.747	1.86	0.397633	0.121395				15.059	89.568	0.469755	5.84576				91.304	17.982	1.13276	0.923521				38.232	124.428	0.474324	6.39038					16.43	0.553	0.951382	0.0976995				39.493	0.609	2.28685	0.107593
			19.439	36.529	0.606385	2.38411				13.279	61.806	0.414229	4.03384				79.372	15.453	0.984727	0.793636				28.612	119.115	0.354974	6.11752					36.781	0.761	2.12981	0.134447				44.042	0.752	2.55026	0.132857
			13.748	2.066	0.428859	0.13484				45.969	2.352	1.43397	0.153506				115.875	19.71	1.4376	1.01227				24.883	80.802	0.30871	4.14984					24.349	0.632	1.40993	0.111657				12.103	61.048	0.700826	10.7855
			31.642	2.089	0.987049	0.136341				14.101	87.787	0.43987	5.72953				83.396	18.114	1.03465	0.9303				27.468	133.232	0.340781	6.84254					63.751	0.757	3.69151	0.133741				14.37	47.505	0.832097	8.3928
			27.215	1.815	0.848952	0.118458				9.758	63.96	0.304394	4.17443				68.285	12.71	0.847176	0.652761				36.448	151.35	0.452191	7.77305					36.345	0.756	2.10456	0.133564				51.848	0.592	3.00227	0.10459
			21.805	2.302	0.680191	0.150243				10.977	1.765	0.34242	0.115195				120.955	20.093	1.50063	1.03194				32.994	93.797	0.409339	4.81723					59.65	0.699	3.45404	0.123494				11.753	49.411	0.68056	8.72953
			15.446	6.752	0.481827	0.440677				39.449	2.336	1.23058	0.152462				101.378	15.217	1.25774	0.781516				39.325	142.861	0.487885	7.33707					47.305	0.893	2.7392	0.157768				5.505	22.5	0.318768	3.97512
			16.9	62.833	0.527183	4.10087				11.798	108.098	0.36803	7.05515				64.105	18.263	0.795317	0.937953				34.902	147.848	0.433011	7.59319					30.143	0.64	1.74544	0.11307				20.435	9.973	1.18329	1.76195
			13.803	32.093	0.430575	2.09459				14.76	50.726	0.460427	3.31069				55.882	15.689	0.693299	0.805757				36.208	178.49	0.449214	9.1669					14.01	0.671	0.811252	0.118547				14.64	60.389	0.847732	10.669
			32.989	2.157	1.02907	0.140779				11.758	62.314	0.366782	4.067				35.401	14.561	0.439202	0.747825				26.552	75.088	0.329417	3.85638					15.856	0.541	0.918145	0.0955795				4.823	21.985	0.279277	3.88413
			19.434	1.939	0.60623	0.126551				49.338	2.43	1.53906	0.158597				34.789	19.917	0.431609	1.0229				36.243	161.724	0.449648	8.30583					7.572	0.304	0.438458	0.0537082				18.276	16.092	1.05828	2.843
			16.392	2.255	0.511337	0.147175				24.611	2.62	0.767722	0.170997				34.398	12.326	0.426758	0.63304				32.283	129.549	0.400518	6.65339					31.901	0.538	1.84723	0.0950495				11.569	60.26	0.669905	10.6462
			37.955	1.899	1.18398	0.123941				38.216	2.131	1.19212	0.139082				45.093	15.278	0.559445	0.784649				36.78	134.664	0.45631	6.91608					36.143	0.603	2.09287	0.106533				39.072	0.774	2.26247	0.136744
			54.876	5.601	1.71182	0.365556				15.851	98.429	0.49446	6.42409				26.812	53.243	0.332642	2.73446				39.294	199.89	0.4875	10.266					12.717	24.726	0.73638	4.36839				8.66	41.062	0.501459	7.2545
			46.593	2.257	1.45343	0.147306				28.116	3.127	0.877058	0.204087				57.147	15.906	0.708993	0.816902				34.084	123.274	0.422862	6.33112					10.074	13.884	0.583337	2.45291				11.945	43.151	0.691677	7.62357
			64.263	1.923	2.00464	0.125507				20.184	21.951	0.629625	1.43266				33.521	19.111	0.415877	0.981504				39.687	201.044	0.492376	10.3252					27.19	0.666	1.57444	0.117663				16.16	68.844	0.935748	12.1628
			38.709	2.562	1.2075	0.167212				15.267	18.684	0.476243	1.21943				28.976	54.58	0.35949	2.80312				39.999	205.872	0.496247	10.5732					22.612	0.435	1.30935	0.0768523				26.981	20.337	1.56234	3.59298
			57.378	2.546	1.78987	0.166168				14.637	97.645	0.456591	6.37292				35.67	31.701	0.442539	1.6281				43.006	209.082	0.533553	10.738					28.96	0.556	1.67693	0.0982295				27.826	1.264	1.61127	0.223313
			20.555	82.16	0.641198	5.36227				37.765	2.645	1.17805	0.172629				7.723	13.02	0.0958152	0.668682				47.417	135.728	0.588278	6.97073					21.276	0.643	1.23199	0.1136				6.439	12.762	0.372851	2.25469
			17.766	35.093	0.554197	2.29039				19.632	49.887	0.612406	3.25594				56.484	15.36	0.700767	0.78886				30.261	178.192	0.375432	9.1516					13.054	1.675	0.755894	0.295925				32.144	1.347	1.8613	0.237977
			25.593	48.41	0.798355	3.15954				18.494	47.78	0.576907	3.11842				35.112	22.836	0.435616	1.17281				36.819	124.429	0.456794	6.39043					15.457	0.894	0.89504	0.157945				11.786	65.32	0.68247	11.5402
			5.875	6.977	0.183266	0.455362				11.965	69.035	0.373239	4.50565				41.321	29.997	0.512648	1.54059				32.958	142.68	0.408893	7.32777					19.023	50.453	1.10153	8.91362				18.236	51.158	1.05596	9.03818
			21.098	8.975	0.658137	0.585764				11.294	56.671	0.352308	3.6987				44.929	14.354	0.557411	0.737194				38.339	122.8	0.475652	6.30677					7.558	48.34	0.437647	8.54032				11.505	39.522	0.666199	6.98242
			26.92	63.926	0.83975	4.17221				18.836	44.606	0.587575	2.91126				24.692	27.664	0.306341	1.42077				30.384	176.799	0.376958	9.08006					36.142	0.511	2.09281	0.0902793				15.105	67.551	0.874658	11.9344
			25.826	74.09	0.805623	4.83557				13.492	17.254	0.420873	1.1261				39.028	122.961	0.4842	6.31504				22.73	104.699	0.281999	5.37714					21.198	2.161	1.22747	0.381788				15.675	39.265	0.907664	6.93702
			24.411	53.798	0.761483	3.51119				6.591	16.259	0.205601	1.06116				43.017	13.794	0.533689	0.708433				41.371	154.574	0.513268	7.93862					8.928	52.33	0.516977	9.24524				14.894	38.81	0.86244	6.85663
			24.936	58.991	0.77786	3.85012				16.368	20.536	0.510588	1.34031				41.819	40.966	0.518826	2.10394				37.027	110.071	0.459375	5.65303					27.703	0.798	1.60415	0.140984				10.057	45.794	0.582352	8.09051
			18.271	127.827	0.569951	8.34278				19.512	47.551	0.608663	3.10347				41.069	52.673	0.509522	2.70518				74.628	60.896	0.92587	3.1275					18.014	43.278	1.0431	7.646				18.882	42.943	1.09337	7.58682
			14.939	53.349	0.466011	3.48189				44.588	2.814	1.39089	0.183659				52.844	16.619	0.655608	0.85352				73.253	63.811	0.908812	3.27721					11.259	2.203	0.651954	0.389208				84.173	0.517	4.87405	0.0913393
			11.159	13.043	0.348097	0.851267				17.664	61.567	0.551016	4.01825				27.432	28.065	0.340334	1.44136				36.659	122.917	0.454809	6.31278					12.522	36.518	0.725089	6.4517				26.192	0.604	1.51665	0.10671
			16.608	118.94	0.518075	7.76276				24.188	30.65	0.754527	2.00041				158.985	15.454	1.97244	0.793688				35.77	133.794	0.44378	6.8714					28.821	0.655	1.66889	0.11572				12.931	38.262	0.748772	6.75982
			14.6	15.7	0.455436	1.02468				17.456	135.539	0.544527	8.84612				29.641	15.635	0.36774	0.802984				31.209	53.547	0.387194	2.75007					26.795	0.524	1.55157	0.092576				12.458	32.877	0.721383	5.80844
			15.863	11.473	0.494835	0.748799				63.389	2.96	1.97737	0.193188				40.587	14.594	0.503542	0.74952				41.087	139.875	0.509745	7.18371					37.288	0.629	2.15917	0.111127				12.866	38.907	0.745008	6.87377
			26.643	91.682	0.831109	5.98374				38.596	2.834	1.20397	0.184964				30.388	31.748	0.377008	1.63052				35.648	101.987	0.442266	5.23786					16.905	2.4	0.978887	0.424012				17.408	9.75	1.00801	1.72255
			23.077	4.83	0.71987	0.315236				79.926	2.744	2.49323	0.17909				71.474	15.095	0.88674	0.77525				39.234	101.554	0.486756	5.21562					28.877	0.851	1.67213	0.150348				8.835	52.621	0.511592	9.29665
			21.989	66.853	0.685931	4.36324				17.856	110.819	0.557005	7.23274				43.755	31.077	0.542845	1.59605				72.188	81.387	0.895599	4.17988					29.119	0.764	1.68614	0.134977				52	0.571	3.01107	0.10088
			12.747	48.666	0.397633	3.17625				48.318	3.081	1.50724	0.201085				48.627	39.749	0.60329	2.04143				44.133	158.457	0.547535	8.13805					17.313	0.79	1.00251	0.139571				17.748	0.577	1.0277	0.10194
			24.653	4.414	0.769032	0.288085				19.186	106.664	0.598493	6.96156				38.451	38.208	0.477041	1.96229				35.744	116.104	0.443457	5.96288					12.112	2.22	0.701348	0.392211				17.206	7.276	0.996317	1.28546
			20.744	4.013	0.647094	0.261913				21.719	21.327	0.677508	1.39193				36.595	21.19	0.454015	1.08828				42.204	112.771	0.523603	5.7917					16.545	39.003	0.958041	6.89073				12.124	31.573	0.702042	5.57806
			21.656	3.565	0.675543	0.232674				20.089	116.968	0.626662	7.63406				77.592	13.664	0.962643	0.701757				46.781	64.586	0.580387	3.31701					18.878	2.331	1.09313	0.411822				18.374	61.435	1.06395	10.8538
			13.934	50.69	0.434661	3.30834				22.133	110.963	0.690423	7.24214				47.108	42.287	0.584444	2.17178				122.7	13.887	1.52227	0.71321					11.877	24.054	0.68774	4.24966				19.466	58.41	1.12718	10.3194
			14.956	46.709	0.466542	3.04852				8.359	36.327	0.260753	2.37093				46.106	151.1	0.572013	7.76021				44.394	138.153	0.550773	7.09527					15.508	36.01	0.897994	6.36195				18.697	19.167	1.08265	3.38627
			63.645	2.798	1.98536	0.182615				18.143	105.39	0.565958	6.87841				113.36	15	1.4064	0.770371				41.405	76.408	0.51369	3.92417					14.259	2.285	0.82567	0.403695				56.94	0.513	3.29712	0.0906327
			17.473	3.749	0.545058	0.244683				12.093	90.997	0.377232	5.93903				41.261	39.367	0.511904	2.02181				35.21	27.362	0.436832	1.40526					32.171	1.555	1.86287	0.274725				39.3	0.449	2.27567	0.0793257
			75.966	3.317	2.3697	0.216488				14.628	51.535	0.45631	3.36349				69.959	14.344	0.867945	0.73668				43.352	123.356	0.537846	6.33533					26.834	0.417	1.55383	0.0736722				17.288	5.961	1.00106	1.05314
			13.151	43.935	0.410236	2.86747				24.593	119.173	0.767161	7.77797				49.88	31.605	0.618835	1.62317				38.85	118.654	0.481992	6.09384					5.663	6.177	0.327917	1.0913				15.452	5.744	0.894751	1.0148
			7.808	2.559	0.243565	0.167016				14.892	92.871	0.464545	6.06134				94.114	16.494	1.16762	0.8471				47.769	137.669	0.592645	7.07042					16.812	0.417	0.973502	0.0736722				14.004	36.295	0.810904	6.4123
			27.794	5.228	0.867014	0.341212				30.599	3.22	0.954514	0.210157				96.624	17.155	1.19876	0.881048				14.409	29.11	0.178765	1.49503					19.654	0.372	1.13807	0.0657219				12.767	44.151	0.739275	7.80024
			17.982	5.318	0.560935	0.347086				61.753	3.304	1.92634	0.21564				117.961	19.765	1.46348	1.01509				17.621	27.691	0.218615	1.42216					21.327	0.429	1.23494	0.0757922				24.953	13.141	1.44491	2.32164
			19.115	5.977	0.596279	0.390096				19.262	27.343	0.600864	1.78457				46.757	103.307	0.58009	5.30565				44.755	73.999	0.555252	3.80045					36.459	0.778	2.11117	0.137451				7.126	29.475	0.412632	5.2074
			13.469	46.723	0.420156	3.04943				10.937	13.819	0.341172	0.901914				34.118	43.424	0.423284	2.23017				48.913	75.586	0.606838	3.88195					26.528	0.635	1.53611	0.112187				14.507	52.731	0.84003	9.31608
			19.917	5.531	0.621296	0.360987				18.209	97.957	0.568017	6.39328				49.248	25.733	0.610994	1.3216				41.409	78.341	0.51374	4.02344					15.888	0.41	0.919998	0.0724355				41.998	0.433	2.4319	0.0764989
			17.614	5.761	0.549456	0.375999				19.542	19.491	0.609599	1.2721				38.753	20.535	0.480788	1.05464				47.456	75.092	0.588762	3.85658					16.845	0.391	0.975413	0.0690787				37.955	0.619	2.19779	0.10936
			20.762	129.497	0.647656	8.45178				13.852	11.713	0.432103	0.764463				31.296	137.1	0.388273	7.04119				76.812	80.616	0.952966	4.14028					26.403	0.46	1.52887	0.081269				43.83	0.552	2.53798	0.0975229
			12.524	105.587	0.390677	6.89126				18.745	113.574	0.584737	7.41255				71.124	17.447	0.882398	0.896044				75.507	80.103	0.936776	4.11394					23.363	0.464	1.35284	0.0819757				9.704	46.726	0.561912	8.25517
			20.09	70.663	0.626693	4.61191				16.973	16.906	0.52946	1.10339				35.962	28.937	0.446162	1.48615				53.141	73.068	0.659293	3.75263					20.096	0.775	1.16366	0.136921				12.628	59.534	0.731227	10.518
			21.857	3.503	0.681813	0.228628				22.582	123.826	0.704429	8.08165				62.585	181.264	0.776459	9.30937				38.93	102.261	0.482984	5.25193					22.143	0.436	1.28219	0.0770289				10.846	44.181	0.62804	7.80554
			35.614	47.162	1.11095	3.07809				19.429	113.968	0.606074	7.43826				34.638	27.751	0.429736	1.42524				78.311	79.312	0.971564	4.07331					37.324	0.557	2.16125	0.0984062				17.978	45.367	1.04102	8.01507
			18.247	27.589	0.569202	1.80063				15.101	83.075	0.471065	5.42199				60.487	178.74	0.750431	9.17974				67.815	20.054	0.841345	1.02993					8.752	0.648	0.506786	0.114483				11.627	46.195	0.673264	8.16136
			19.663	3.923	0.613373	0.256039				13.792	12.8	0.430231	0.835408				68.46	182.556	0.849347	9.37573				36.689	56.593	0.455181	2.90651					18.946	0.706	1.09707	0.12473				13.689	44.957	0.792664	7.94264
			18.845	88.469	0.587856	5.77404				70.994	3.35	2.21461	0.218642				23.455	95.266	0.290994	4.89268				31.831	107.41	0.394911	5.51637					14.031	0.53	0.812468	0.0936361				11.464	47.83	0.663825	8.45021
			41.504	24.92	1.29469	1.62643				88.96	2.647	2.77504	0.17276				53.988	30.099	0.669801	1.54583				102.413	92.09	1.27058	4.72957					17.137	0.489	0.992321	0.0863925				13.315	23.754	0.771008	4.19666
			4.678	19.594	0.145927	1.27883				12.128	11.395	0.378324	0.743709				44.311	164.157	0.549743	8.43079				56.368	79.831	0.699328	4.09997					8.285	0.965	0.479744	0.170488				15.484	50.13	0.896604	8.85656
			15.719	81.059	0.490343	5.29041				76.401	2.441	2.38327	0.159315				4.574	2.841	0.0567472	0.145908				48.986	72.894	0.607744	3.7437					10.824	0.807	0.626766	0.142574				45.434	0.782	2.63086	0.138157
			11.863	64.524	0.370058	4.21124				60.414	3.014	1.88457	0.196712				57.729	83.48	0.716213	4.28737				41.299	72.116	0.512375	3.70374					4.784	10.857	0.277018	1.91813				11.997	28.385	0.694688	5.01483
			37.471	19.507	1.16888	1.27315				15.744	2.994	0.491123	0.195407				45.136	17.568	0.559979	0.902259				43.627	79.464	0.541257	4.08112					20.063	0.459	1.16175	0.0810924				9.17	23.521	0.530991	4.1555
			15.958	10.98	0.497798	0.716623				94.665	2.809	2.95301	0.183333				34.95	58.332	0.433606	2.99582				72.874	18.801	0.90411	0.965583					12.351	1.06	0.715187	0.187272				11.068	26.852	0.640895	4.74399
			29.502	30.192	0.920293	1.97052				69.905	2.772	2.18064	0.180918				33.1	52.186	0.410654	2.68017				78.046	69.577	0.968276	3.57334					23.21	0.524	1.34398	0.092576				14.728	47.656	0.852828	8.41947
			34.832	3.622	1.08656	0.236394				13.864	12.801	0.432477	0.835473				28.195	45.286	0.349801	2.3258				32.425	96.636	0.40228	4.96304					10.445	0.562	0.60482	0.0992896				11.712	44.386	0.678185	7.84176
			32.66	5.333	1.0188	0.348065				23.181	51.519	0.723114	3.36245				61.786	20.336	0.766547	1.04442				78.083	93.61	0.968735	4.80763					16.618	0.547	0.962268	0.0966395				10.279	39.339	0.595207	6.95009
			17.65	28.484	0.550579	1.85904				55.055	2.806	1.7174	0.183137				54.72	131.937	0.678882	6.77603				45.541	50.015	0.565003	2.56867					9.608	0.703	0.556353	0.1242				13.587	50.352	0.786758	8.89578
			41.836	3.24	1.30504	0.211463				42.704	2.365	1.33212	0.154355				45.055	17.206	0.558974	0.883667				121.536	12.352	1.50783	0.634375					14.152	0.444	0.819474	0.0784423				18.744	35.462	1.08537	6.26514
			27.083	33.255	0.844835	2.17043				78.052	2.758	2.43478	0.180004				41.052	13.996	0.509311	0.718808				56.052	103.094	0.695408	5.29471					5.374	0.541	0.311182	0.0955795				29.774	0.952	1.72407	0.168192
			42.305	4.07	1.31967	0.265634				70.657	2.747	2.20409	0.179286				47.715	59.696	0.591975	3.06587				47.922	50.132	0.594543	2.57468					24.337	0.496	1.40924	0.0876292				13.747	44.603	0.796023	7.88009
			32.829	3.919	1.02408	0.255778				108.442	2.85	3.38277	0.186009				44.61	114.15	0.553453	5.86252				153.701	9.057	1.90689	0.46515					12.413	41.985	0.718777	7.41757				42.193	0.474	2.44319	0.0837425
			35.677	3.917	1.11292	0.255648				7.754	19.488	0.24188	1.27191				32.024	18.886	0.397305	0.969949				57.934	66.699	0.718757	3.42553					7.77	0.601	0.449923	0.10618				11.119	47.797	0.643848	8.44438
			62.002	3.281	1.93411	0.214138				73.347	2.869	2.28801	0.187249				55.433	18.285	0.687728	0.939082				41.85	87.546	0.519211	4.49619					14.441	0.616	0.836209	0.10883				3.853	0.971	0.223109	0.171548
			24.566	79.498	0.766319	5.18853				17.574	74.8	0.548208	4.88191				35.756	127.944	0.443606	6.57096				42.961	75.548	0.532995	3.88					13.459	0.68	0.779346	0.120137				11.929	49.146	0.690751	8.68271
			24.325	10.237	0.758801	0.66813				32.55	44.485	1.01537	2.90337				93.216	18.012	1.15648	0.925062				62.674	99.192	0.777563	5.09431					15.87	0.479	0.918955	0.0846258				11.485	53.13	0.665041	9.38658
			11.004	16.434	0.343262	1.07259				16.433	74.403	0.512616	4.856				47.288	14.351	0.586677	0.73704				87.572	10.778	1.08646	0.553537					23.796	0.65	1.37791	0.114837				33.778	0.674	1.95592	0.119077
			20.46	20.339	0.638235	1.32745				10.589	4.188	0.330316	0.273335				81.776	17.675	1.01455	0.907754				54.432	125.478	0.675309	6.44431					17.492	1.301	1.01288	0.22985				14.812	1.633	0.857692	0.288505
			15.166	30.879	0.473092	2.01536				82.822	2.794	2.58357	0.182354				62.906	16.225	0.780442	0.833285				86.381	9.615	1.07168	0.493808					30.07	0.56	1.74121	0.0989362				21.244	57.041	1.23014	10.0775
			15.61	25.413	0.486943	1.65861				81.701	3.271	2.5486	0.213486				108.781	17.852	1.34959	0.916844				76.876	8.948	0.95376	0.459552					11.559	33.709	0.669326	5.95543				12.646	46.152	0.732269	8.15376
			14.441	44.925	0.450477	2.93208				55.386	36.242	1.72773	2.36538				42.346	13.911	0.525365	0.714442				46.041	77.577	0.571207	3.98421					19.589	0.442	1.1343	0.078089				13.966	3.181	0.808704	0.561993
			40.089	96.762	1.25055	6.31529				42.598	26.591	1.32881	1.73549				70.079	16.781	0.869433	0.86184				54.486	58.592	0.675979	3.00917					22.634	0.365	1.31063	0.0644852				14.836	56.61	0.859081	10.0014
			14.422	24.582	0.449884	1.60437				78.991	2.95	2.46407	0.192535				54.215	14.113	0.672617	0.724817				39.851	85.951	0.49441	4.41428					6.513	9.878	0.377136	1.74516				15.074	40.152	0.872863	7.09373
			85.844	6.184	2.67784	0.403606				44.317	2.664	1.38244	0.173869				167.274	15.677	2.07528	0.805141				48.031	124.252	0.595895	6.38134					9.65	0.542	0.558785	0.0957561				13.035	44.995	0.754794	7.94935
			12.346	40.211	0.385125	2.62442				107.142	4.316	3.34222	0.281689				85.603	14.043	1.06203	0.721221				87.835	9.546	1.08972	0.490264					12.047	22.266	0.697584	3.93378				19.633	30.713	1.13685	5.42612
			29.398	46.432	0.917049	3.03044				9.939	9.859	0.31004	0.64346				84.805	17.222	1.05213	0.884489				41.431	101.611	0.514013	5.21855					10.785	0.56	0.624507	0.0989362				15.555	35.593	0.900715	6.28828
			10.412	9.288	0.324795	0.606193				99.081	2.814	3.09076	0.183659				63.109	14.715	0.78296	0.755734				43.077	87.931	0.534434	4.51597					30.003	0.614	1.73733	0.108477				14.211	41.958	0.822891	7.4128
			84.122	7.314	2.62412	0.477357				75.848	2.932	2.36602	0.191361				64.802	14.728	0.803964	0.756402				172.56	9.423	2.14086	0.483947					11.071	0.477	0.641068	0.0842725				12.687	40.986	0.734643	7.24107
			76.785	3.37	2.39525	0.219947				76.612	3.322	2.38986	0.216814				124.542	14.382	1.54513	0.738632				46.379	114.289	0.5754	5.86966					32.312	0.735	1.87103	0.129854				54.975	0.371	3.18334	0.0655453
			7.683	11.588	0.239666	0.756305				21.81	104.536	0.680347	6.82267				75.314	15.316	0.934381	0.7866				51.996	107.589	0.645087	5.52556					15.475	0.71	0.896083	0.125437				48.877	0.492	2.83023	0.0869225
			59.374	8.072	1.85213	0.526829				27.142	36.928	0.846675	2.41015				106.512	15.131	1.32144	0.777099				201.038	8.284	2.49417	0.42545					10.753	1.485	0.622654	0.262358				12.856	48.401	0.744429	8.55109
			85.853	3.549	2.67812	0.23163				56.111	2.568	1.75034	0.167604				48.394	72.42	0.600399	3.71935				40.947	104.963	0.508008	5.3907					17.175	0.425	0.994522	0.0750855				59.002	0.465	3.41652	0.0821524
			65.143	3.862	2.03209	0.252058				17.388	64.022	0.542406	4.17847				58.26	16.641	0.722801	0.85465				69.329	83.9	0.860129	4.30894					14.49	2.04	0.839046	0.360411				9.822	37.983	0.568745	6.71053
			60.525	8.989	1.88803	0.586678				59.491	2.97	1.85578	0.193841				111.683	19.664	1.38559	1.00991				47.636	163.513	0.590995	8.39771					21.843	0.409	1.26482	0.0722588				10.886	28.3	0.630356	4.99981
			57.193	4.45	1.78409	0.290435				49.668	2.319	1.54936	0.151352				112.73	14.381	1.39858	0.738581				40.829	122.47	0.506544	6.28982					13.839	0.656	0.80135	0.115897				8.11	33.988	0.469611	6.00472
			32.878	4.797	1.02561	0.313082				54.062	3.017	1.68642	0.196908				66.029	16.84	0.819187	0.86487				44.923	159.115	0.557336	8.17184					11.225	44.862	0.649986	7.92585				9.333	8.439	0.540429	1.49093
			62.561	3.79	1.95154	0.247359				17.259	37.367	0.538382	2.4388				52.125	70.524	0.646688	3.62198				36.575	97.901	0.453767	5.02801					7.281	9.93	0.421608	1.75435				38.883	1.854	2.25153	0.32755
			75.593	8.616	2.35807	0.562334				17.447	2.41	0.544247	0.157292				99.104	20.059	1.22953	1.03019				44.278	112.629	0.549334	5.78441					5.983	6.404	0.346447	1.13141				14.231	31.968	0.824049	5.64785
			84.036	3.744	2.62144	0.244357				49.863	10.306	1.55544	0.672634				90.039	15.633	1.11707	0.802881				43.958	59.698	0.545364	3.06597					9.355	0.529	0.541703	0.0934594				8.879	43.18	0.51414	7.62869
			66.968	3.745	2.08902	0.244422				39.073	6.053	1.21885	0.395056				73.873	26.077	0.916504	1.33926				92.165	12.117	1.14344	0.622306					10.036	0.658	0.581136	0.11625				13.526	32.119	0.783225	5.67452
			39.609	5.332	1.23557	0.347999				44.517	7.015	1.38868	0.457843				77.093	17.158	0.956452	0.881202				41.729	123.959	0.51771	6.3663					25.84	0.827	1.49627	0.146108				51.12	0.455	2.96011	0.0803857
			14.574	4.855	0.454625	0.316867				65.707	11.635	2.04968	0.759372				157.486	16.723	1.95385	0.858861				41.522	74.145	0.515142	3.80794					6.192	0.561	0.358549	0.0991129				16.784	51.802	0.971881	9.15195
			14.126	7.716	0.44065	0.503594				59.4	3.005	1.85294	0.196125				65.011	15.004	0.806557	0.770577				29.436	24.384	0.365197	1.25232					6.379	7.183	0.369377	1.26903				56.344	0.508	3.26261	0.0897493
			53.691	7.759	1.67485	0.506401				46.288	2.778	1.44392	0.18131				72.69	30.82	0.901827	1.58286				37.776	111.356	0.468667	5.71903					13.063	0.489	0.756415	0.0863925				14.951	54.243	0.86574	9.58321
			21.59	7.803	0.673484	0.509272				21.269	98.712	0.663471	6.44256				103.479	20.788	1.28381	1.06763				42.118	129.081	0.522536	6.62935					22.153	0.582	1.28277	0.102823				38.719	0.577	2.24203	0.10194
			20.016	26.454	0.624385	1.72655				72.417	3.402	2.259	0.222036				72.923	19.562	0.904717	1.00467				15.361	28.546	0.190576	1.46607					18.935	0.507	1.09643	0.0895726				65.507	0.771	3.79319	0.136214
			22.19	24.728	0.692201	1.6139				69.534	3.103	2.16906	0.202521				102.77	17.034	1.27501	0.874833				18.462	28.142	0.229048	1.44532					21.836	0.804	1.26442	0.142044				13.734	49.926	0.79527	8.82052
			32.582	4.515	1.01637	0.294677				55.445	3.434	1.72957	0.224124				76.888	16.141	0.953909	0.828971				44.393	70.497	0.550761	3.62059					24.578	0.71	1.42319	0.125437				14.453	47.02	0.836904	8.30711
			32.651	2.11	1.01852	0.137712				58.395	2.928	1.82159	0.191099				74.998	18.168	0.930461	0.933074				52.925	75.605	0.656613	3.88293					8.674	0.644	0.50227	0.113777				12.633	30.212	0.731516	5.33761
			27.731	2.292	0.865048	0.14959				16.769	34.018	0.523097	2.22023				180.959	17.73	2.24506	0.910579				43.033	69.394	0.533888	3.56394					18.851	0.608	1.09157	0.107416				5.944	25.634	0.344188	4.52881
			39.96	2.407	1.24652	0.157096				53.694	2.734	1.67495	0.178438				110.794	17.166	1.37456	0.881613				35.831	79.936	0.444536	4.10536					9.154	0.618	0.530064	0.109183				8.857	36.055	0.512866	6.3699
			45.938	2.25	1.433	0.146849				53.627	3.533	1.67286	0.230586				100.533	15.285	1.24726	0.785008				37.653	70.737	0.467141	3.63292					15.495	0.896	0.897241	0.158298				18.62	65.538	1.07819	11.5787
			39.795	2.133	1.24138	0.139213				75.154	3.197	2.34437	0.208656				54.733	18.47	0.679044	0.948584				43.082	65.603	0.534496	3.36924					9.792	0.92	0.567008	0.162538				11.4	33.329	0.660119	5.8883
			47.417	2.224	1.47914	0.145152				67.552	3.261	2.10724	0.212833				107.691	15.863	1.33607	0.814693				73.742	76.919	0.914878	3.95041					21.582	0.773	1.24971	0.136567				16.308	60.121	0.944318	10.6217
			26.919	2.144	0.839719	0.139931				21.332	93.06	0.665436	6.07367				99.925	22.163	1.23972	1.13825				66.68	73.547	0.827264	3.77723					15.189	0.614	0.879522	0.108477				16.411	61.325	0.950282	10.8344
			41.442	1.777	1.29275	0.115978				69.331	3.088	2.16273	0.201542				52.038	15.598	0.645608	0.801083				48.031	66.583	0.595895	3.41957					10.636	0.366	0.61588	0.0646619				11.579	45.495	0.670484	8.03769
			43.995	2.153	1.37239	0.140518				43.842	6.425	1.36762	0.419335				93.96	15.49	1.16571	0.795537				35.922	93.177	0.445665	4.78539					21.412	0.718	1.23987	0.12685				11.876	30.427	0.687682	5.37559
			33.189	2.198	1.03531	0.143455				71.579	2.989	2.23285	0.195081				112.134	16.516	1.39119	0.84823				43.991	61.008	0.545773	3.13325					5.25	9.039	0.304002	1.59694				18.742	57.109	1.08526	10.0896
			27.71	1.808	0.864393	0.118001				35.018	3.328	1.09236	0.217206				82.744	15.5	1.02656	0.79605				63.769	20.091	0.791149	1.03184					7.982	0.785	0.462199	0.138687				18.389	59.182	1.06482	10.4558
			41.142	2.645	1.28339	0.172629				67.57	3.434	2.1078	0.224124				130.416	15.861	1.618	0.81459				35.784	110.15	0.443953	5.65709					16.2	0.641	0.938064	0.113247				16.337	65.728	0.945997	11.6123
			34.105	2.361	1.06388	0.154094				63.882	3.054	1.99275	0.199323				163.347	18.477	2.02656	0.948943				50.615	16.966	0.627954	0.871341					5.776	6.239	0.33446	1.10226				15.716	57.799	0.910038	10.2115
			20.433	3.257	0.637393	0.212572				91.509	3.306	2.85456	0.21577				61.145	71.322	0.758594	3.66296				103.586	83.48	1.28514	4.28737					25.594	0.651	1.48203	0.115013				18.772	77.424	1.087	13.6786
			39.478	2.056	1.23149	0.134187				78.202	3.183	2.43945	0.207742				101.523	28.269	1.25954	1.45184				50.412	70.986	0.625435	3.6457					12.749	0.645	0.738233	0.113953				13.565	59.289	0.785484	10.4747
			37.371	1.955	1.16576	0.127595				81.879	2.984	2.55416	0.194754				78.94	17.046	0.979367	0.87545				41.273	66.765	0.512052	3.42892					12.103	0.797	0.700826	0.140807				16.449	64.753	0.952482	11.44
			29.128	2.595	0.908627	0.169366				55.922	3.122	1.74445	0.203761				149.278	18.854	1.85201	0.968305				42.974	76.037	0.533156	3.90511					15.605	1.3	0.90361	0.229673				16.602	68.761	0.961342	12.1481
			43.374	2.059	1.35302	0.134383				67.906	2.788	2.11828	0.181962				93.406	17.083	1.15884	0.87735				40.767	113.917	0.505775	5.85056					14.885	0.395	0.861919	0.0697854				15.289	48.445	0.885312	8.55887
			19.551	1.722	0.609879	0.112388				13.197	77.677	0.411671	5.06968				101.934	17.619	1.26464	0.904878				65.331	80.282	0.810527	4.12313					17.036	0.628	0.986473	0.11095				18.549	76.038	1.07408	13.4338
			24.273	2.012	0.757179	0.131316				14.978	3.482	0.467228	0.227257				104.968	18.423	1.30228	0.94617				44.289	48.315	0.54947	2.48137					19.255	0.6	1.11496	0.106003				14.261	61.563	0.825786	10.8764
			20.755	23.588	0.647437	1.5395				19.47	5.512	0.607353	0.359747				120.421	18.082	1.494	0.928657				113.706	12.671	1.41069	0.650758					7.041	0.562	0.40771	0.0992896				18.577	48.104	1.0757	8.49862
			38.452	1.947	1.19948	0.127073				14.946	4.25	0.46623	0.277381				90.164	67.56	1.11862	3.46975				52.233	97.522	0.648027	5.00854					5.049	8.336	0.292363	1.47274				13.018	60.047	0.75381	10.6086
			22.78	28.172	0.710606	1.83868				21.855	4.035	0.681751	0.263349				86.928	48.165	1.07847	2.47366				42.297	45.953	0.524757	2.36006					2.838	4.085	0.164335	0.721704				17.598	76.453	1.01902	13.5071
			34.388	1.988	1.07271	0.129749				14.936	5.67	0.465918	0.370059				105.889	17.249	1.31371	0.885875				59.498	66.003	0.73816	3.38979					5.203	5.307	0.301281	0.937597				17.823	67.961	1.03204	12.0068
			22.391	40.772	0.698471	2.66103				10.72	4.822	0.334403	0.314714				127.739	18.253	1.58479	0.937439				39.999	81.543	0.496247	4.18789					7.462	15.24	0.432088	2.69248				23.55	69.145	1.36367	12.216
			22.372	38.973	0.697878	2.54362				6.737	46.185	0.210156	3.01432				90.242	16.728	1.11959	0.859118				40.512	69.542	0.502611	3.57154					4.905	13.933	0.284025	2.46157				17.701	69.76	1.02498	12.3246
			30.131	1.883	0.939915	0.122896				15.443	5.646	0.481733	0.368493				104.807	18.41	1.30029	0.945502				56.982	91.382	0.706946	4.6932					6.136	6.897	0.355306	1.21851				21.038	64.268	1.21821	11.3543
			22.84	1.776	0.712477	0.115913				11.15	3.286	0.347816	0.214465				128.713	18.46	1.59687	0.94807				82.588	10.008	1.02463	0.513992					4.804	14.133	0.278176	2.4969				23.133	67.733	1.33952	11.9665
			22.974	2.205	0.716657	0.143912				10.684	5.826	0.33328	0.380241				73.148	19.254	0.907509	0.988848				49.989	116.996	0.620187	6.00869					6.333	8.124	0.366714	1.43528				20.533	53.356	1.18897	9.4265
			39.298	2.285	1.22587	0.149133				19.501	5.884	0.60832	0.384026				85.899	16.286	1.0657	0.836418				82.532	9.157	1.02393	0.470286					6.257	16.013	0.362313	2.82905				41.15	0.391	2.3828	0.0690787
			40.426	2.67	1.26106	0.174261				14.107	4.415	0.440058	0.28815				106.284	30.193	1.31861	1.55065				82.764	9.016	1.02681	0.463044					5.54	6.342	0.320795	1.12045				7.835	21.857	0.453687	3.86152
			26.68	2.125	0.832263	0.138691				12.173	4.355	0.379728	0.284234				150.736	18.072	1.8701	0.928143				47.462	75.204	0.588836	3.86233					3.425	3.278	0.198325	0.57913				44.616	0.576	2.5835	0.101763
			37.003	2.228	1.15428	0.145413				7.769	22.105	0.242348	1.44271				77.766	17.246	0.964802	0.885721				36.835	78.524	0.456993	4.03284					9.1	29.846	0.526937	5.27295				58.702	0.408	3.39915	0.0720821
			34.457	2.192	1.07486	0.143064				4.584	8.606	0.142995	0.561681				100.645	31.082	1.24865	1.59631				44.644	51.277	0.553875	2.63349					6.042	6.902	0.349863	1.21939				36.079	0.401	2.08916	0.0708454
			17.377	2.007	0.542063	0.130989				6.415	6.868	0.200111	0.448248				156.121	18.195	1.93691	0.93446				84.89	9.015	1.05319	0.462993					4.974	9.317	0.28802	1.64605				32.017	0.347	1.85395	0.0613051
			44.241	2.397	1.38007	0.156443				7.27	16.305	0.226782	1.06417				157.736	20.515	1.95695	1.05361				35.974	90.785	0.446311	4.66254					7.318	15.399	0.42375	2.72057				27.777	0.419	1.60843	0.0740255
			37.133	1.877	1.15834	0.122505				21.224	9.137	0.662067	0.596337				108.307	18.265	1.34371	0.938055				36.64	82.918	0.454573	4.25851					7.348	15.736	0.425487	2.78011				37.775	0.463	2.18737	0.0817991
			43.292	2.401	1.35046	0.156704				6.824	19.52	0.21287	1.274				102.896	22.543	1.27658	1.15777				158.7	9.533	1.96891	0.489597					5.283	12.834	0.305913	2.26741				49.361	0.428	2.85826	0.0756155
			11.966	78.168	0.373271	5.10173				5.748	12.304	0.179305	0.803036				128.173	20.124	1.59018	1.03353				42.39	116.085	0.525911	5.9619					6.203	5.662	0.359186	1.00032				27.585	0.427	1.59731	0.0754389
			18.434	1.941	0.575035	0.126682				16.723	31.404	0.521662	2.04962				85.986	14.991	1.06678	0.769909				46.07	104.805	0.571566	5.38258					6.486	0.58	0.375573	0.10247				30.674	0.49	1.77618	0.0865692
			33.204	2.569	1.03577	0.167669				14.462	60.147	0.451132	3.92557				129.554	19.341	1.60731	0.993317				53.313	111.464	0.661426	5.72458					6.742	0.464	0.390397	0.0819757				34.354	0.453	1.98927	0.0800323
			29.12	2.747	0.908377	0.179286				16.206	63.773	0.505534	4.16222				144.661	19.834	1.79473	1.01864				54.873	110.561	0.680781	5.6782					5.635	12.201	0.326296	2.15557				36.712	0.418	2.12582	0.0738488
			41.812	2.555	1.30429	0.166755				14.015	61.754	0.437188	4.03045				76.63	19.048	0.950708	0.978269				202.042	8.109	2.50663	0.416463					5.593	0.622	0.323864	0.10989				38.155	0.382	2.20937	0.0674886
			25.598	2.119	0.798511	0.138299				11.403	53.772	0.355708	3.5095				164.825	20.679	2.0449	1.06203				45.609	112.309	0.565847	5.76797					9.21	0.542	0.533307	0.0957561				20.454	0.395	1.18439	0.0697854
			30.325	2.585	0.945966	0.168713				13.096	4.736	0.40852	0.309101				97.171	18.095	1.20555	0.929324				126.139	10.123	1.56494	0.519898					9.993	0.54	0.578646	0.0954028				25.08	0.837	1.45226	0.147874
			34.67	2.458	1.08151	0.160424				23.104	66.126	0.720713	4.31579				135.853	19.37	1.68546	0.994806				89.948	80.499	1.11594	4.13427					5.308	8.305	0.307361	1.46726				49.461	0.409	2.86405	0.0722588
			36.254	2.451	1.13092	0.159967				15.032	79.497	0.468912	5.18847				148.071	20.216	1.83704	1.03825				40.271	94.086	0.499621	4.83208					7.389	0.518	0.427861	0.091516				43.03	0.44	2.49166	0.0777356
			40.835	2.247	1.27382	0.146653				16.987	3.421	0.529897	0.223276				64.779	137.091	0.803679	7.04073				92.981	10.306	1.15357	0.529296					7.545	1.367	0.436895	0.24151				37.428	0.337	2.16728	0.0595384
			23.712	2.399	0.739679	0.156574				17.107	82.652	0.53364	5.39438				46.42	125.884	0.575909	6.46516				166.038	7.359	2.05995	0.377944					6.596	13.434	0.381943	2.37341				34.419	0.967	1.99304	0.170842
			30.022	2.16	0.936515	0.140975				14.16	81.202	0.441711	5.29975				39.899	131.679	0.495006	6.76278				91.463	9.792	1.13473	0.502898					9.297	0.406	0.538344	0.0717288				27.043	0.384	1.56593	0.067842
			31.481	2.613	0.982027	0.170541				10.729	57.137	0.334683	3.72912				58.333	182.322	0.723707	9.36371				90.635	9.032	1.12446	0.463866					11.704	0.322	0.677722	0.0568883				48.919	0.453	2.83266	0.0800323
			28.161	2.19	0.878462	0.142933				12.766	63.76	0.398226	4.16137				52.851	175.222	0.655695	8.99907				120.744	8.505	1.49801	0.4368					20.324	0.404	1.17686	0.0713754				32.703	0.295	1.89367	0.0521182
			26.34	2.496	0.821657	0.162904				14.483	71.601	0.451787	4.67313				42.53	144.677	0.527647	7.43033				83.908	18.253	1.041	0.937439					16.869	0.515	0.976803	0.090986				41.337	0.605	2.39363	0.106886
			12.4	69.146	0.386809	4.5129				10.98	55.845	0.342513	3.64479				47.277	156.92	0.586541	8.05911				175.834	12.514	2.18148	0.642695					7.707	11.481	0.446275	2.02837				37.274	0.456	2.15836	0.0805624
			15.398	18.162	0.480329	1.18537				16.308	77.881	0.508716	5.083				40.782	228.784	0.505961	11.7499				119.261	77.785	1.47961	3.99489					10.248	0.479	0.593412	0.0846258				29.469	0.776	1.70641	0.137097
			15.749	18.49	0.491279	1.20677				22.155	100.733	0.691109	6.57446				51.263	15.74	0.635993	0.808376				73.43	13.701	0.911008	0.703657					11.293	0.449	0.653923	0.0793257				34.227	0.389	1.98192	0.0687253
			15.574	16.112	0.48582	1.05157				16.527	77.237	0.515548	5.04097				127.794	14.353	1.58547	0.737142				179.268	12.269	2.22408	0.630112					6.758	18.456	0.391323	3.26066				63.96	0.418	3.70362	0.0738488
			14.135	49.699	0.440931	3.24367				9.078	35.38	0.283182	2.30912				60.698	22.178	0.753048	1.13902				56.869	141.524	0.705544	7.2684					19.188	0.459	1.11108	0.0810924				32.322	0.284	1.87161	0.0501748
			18.542	80.372	0.578404	5.24558				14.986	69.5	0.467477	4.536				130.327	16.106	1.6169	0.827173				48.733	14.088	0.604605	0.723533					21.638	0.465	1.25295	0.0821524				3.649	15.014	0.211296	2.65255
			9.022	30.894	0.281435	2.01633				14.902	79.075	0.464857	5.16093				124.404	17.918	1.54342	0.920234				99.895	14.509	1.23934	0.745154					14.401	0.451	0.833893	0.079679				33.056	0.327	1.91411	0.0577717
			17.004	74.284	0.530427	4.84824				12.603	86.982	0.393141	5.67699				173.257	18.054	2.14951	0.927219				101.632	19.662	1.26089	1.0098					6.436	10.082	0.372678	1.78121				43.637	0.348	2.52681	0.0614818
			20.011	22.896	0.624229	1.49434				62.252	1.626	1.94191	0.106123				137.312	18.611	1.70356	0.955825				45.394	99.595	0.56318	5.11501					8.08	1.972	0.467874	0.348397				38.492	1.105	2.22889	0.195222
			15.945	9.542	0.497393	0.62277				23.022	30.995	0.718155	2.02293				129.422	20.428	1.60567	1.04914				97.303	119.458	1.20719	6.13513					7.569	0.511	0.438284	0.0902793				32.416	0.524	1.87705	0.092576
			18.537	24.884	0.578248	1.62408				28.378	0.925	0.885231	0.0603713				109.347	17.644	1.35661	0.906162				91.978	61.281	1.14112	3.14727					6.828	0.943	0.395377	0.166602				4.577	12.782	0.265032	2.25822
			26.321	4.289	0.821064	0.279927				74.328	1.873	2.31861	0.122244				118.917	18.53	1.47534	0.951665				37.22	90.598	0.461769	4.65294					18.85	0.391	1.09151	0.0690787				44.033	0.346	2.54974	0.0611285
			24.342	136.15	0.759331	8.886				23.875	37.711	0.744763	2.46125				154.906	19.672	1.92184	1.01032				76.123	92.892	0.944418	4.77075					7.127	10.877	0.41269	1.92166				4.444	10.764	0.257331	1.9017
			26.848	5.146	0.837504	0.33586				60.03	2.048	1.87259	0.133665				138.43	18.279	1.71743	0.938774				61.08	148.502	0.757788	7.62678					8.729	3.002	0.505454	0.530369				27.016	0.439	1.56437	0.0775589
			24.569	53.239	0.766412	3.47471				89.92	1.737	2.80499	0.113367				156.526	15.622	1.94194	0.802316				54.62	173.403	0.677642	8.90564					25.05	0.433	1.45052	0.0764989				52.162	0.463	3.02045	0.0817991
			19.331	74.91	0.603017	4.88909				61.958	1.733	1.93273	0.113106				193.577	21.857	2.40161	1.12253				42.667	147.95	0.529347	7.59843					4.543	0.335	0.263063	0.0591851				10.359	17.651	0.59984	3.11843
			26.639	4.377	0.830984	0.28567				38.751	1.863	1.20881	0.121591				110.323	17.54	1.36872	0.900821				54.174	131.827	0.672108	6.77038					8.316	8.866	0.481539	1.56637				7.885	17.137	0.456582	3.02763
			33.369	4.048	1.04092	0.264198				54.771	1.786	1.70854	0.116565				161.431	18.492	2.00279	0.949714				82.457	23.693	1.023	1.21683					9.731	0.653	0.563475	0.115367				30.597	0.622	1.77172	0.10989
			17.793	5.219	0.55504	0.340624				58.968	1.81	1.83946	0.118132				94.912	17.511	1.17752	0.899331				164.055	14.685	2.03534	0.754193					8.406	2.867	0.486751	0.506518				39.723	0.437	2.30017	0.0772056
			17.395	4.938	0.542624	0.322285				12.26	92.364	0.382442	6.02825				125.594	18.277	1.55818	0.938672				91.227	25.962	1.13181	1.33336					5.823	0.703	0.337182	0.1242				36.152	0.639	2.09339	0.112893
			25.191	5.324	0.785815	0.347477				14.049	97.034	0.438248	6.33304				183.001	21.967	2.2704	1.12818				34.114	162.828	0.423235	8.36253					5.692	0.458	0.329596	0.0809157				6.937	26.107	0.401688	4.61237
			31.691	7.768	0.988578	0.506988				33.221	1.829	1.0363	0.119372				168.77	18.58	2.09384	0.954233				52.936	147.918	0.656749	7.59678					7.161	0.871	0.414659	0.153881				7.067	18.798	0.409216	3.32108
			30.344	4.969	0.946559	0.324308				64.715	2.794	2.01874	0.182354				153.318	22.905	1.90214	1.17636				65.265	178.455	0.809709	9.16511					10.295	0.489	0.596134	0.0863925				39.682	0.597	2.29779	0.105473
			15.675	14.342	0.48897	0.936048				13.99	89.641	0.436408	5.85053				100.396	18.395	1.24556	0.944732				67.613	11.467	0.838839	0.588923					7.708	0.671	0.446333	0.118547				27.492	0.332	1.59193	0.0586551
			34.938	3.697	1.08987	0.241289				15.288	96.551	0.476898	6.30152				111.21	17.584	1.37972	0.90308				57.629	154.21	0.714973	7.91993					22.306	0.477	1.29163	0.0842725				9.414	3.252	0.545119	0.574537
			34.221	8.378	1.0675	0.5468				29.01	1.979	0.904946	0.129162				167.6	17.899	2.07933	0.919258				135.337	12.082	1.67906	0.620508					9.559	0.966	0.553516	0.170665				22.068	12.648	1.27785	2.23455
			12.735	9.904	0.397259	0.646397				40.107	2.159	1.25111	0.14091				111.447	17.257	1.38266	0.886286				95.792	13.476	1.18844	0.692101					7.718	1.997	0.446912	0.352814				7.443	20.578	0.430988	3.63555
			29.371	3.808	0.916207	0.248534				40.312	21.022	1.2575	1.37203				152.513	17.543	1.89215	0.900975				56.225	182.234	0.697554	9.35919					8.64	0.513	0.500301	0.0906327				11.666	17.767	0.675522	3.13893
			26.229	3.59	0.818195	0.234306				70.818	1.809	2.20912	0.118067				198.14	22.894	2.45822	1.17579				56.558	99.331	0.701685	5.10145					8.315	2.827	0.481482	0.499451				22.172	10.379	1.28387	1.83368
			35.458	5.192	1.10609	0.338862				41.369	30.809	1.29048	2.01079				113.33	31.857	1.40603	1.63611				63.37	121.659	0.786198	6.24817					12.599	0.509	0.729547	0.089926				7.881	48.326	0.456351	8.53784
			15.657	16.967	0.488409	1.10737				57.22	2.318	1.78494	0.151287				19.101	18.358	0.236976	0.942832				103.153	11.732	1.27977	0.602533					4.515	0.29	0.261442	0.0512348				9.063	40.945	0.524795	7.23383
			21.821	26.235	0.68069	1.71226				30.883	14.514	0.963373	0.947274				78.153	20.067	0.969603	1.0306				35.969	121.711	0.446249	6.25084					6.94	14.249	0.401862	2.5174				8.806	30.034	0.509913	5.30616
			26.567	3.825	0.828738	0.249643				10.663	90.165	0.332625	5.88473				213.874	22.642	2.65342	1.16285				62.739	171.195	0.77837	8.79225					9.357	12.611	0.541819	2.22801				16.669	20.547	0.965221	3.63008
			32.5	3.685	1.01381	0.240506				52.247	1.884	1.62981	0.122962				118.001	17.086	1.46398	0.877504				131.526	15.958	1.63177	0.819572					14.383	6.714	0.83285	1.18617				3.601	0.477	0.208517	0.0842725
			40.926	3.439	1.27666	0.224451				49.595	2.036	1.54708	0.132882				182.709	22.407	2.26677	1.15078				92.459	19.542	1.14709	1.00364					31.627	0.458	1.83137	0.0809157				12.927	42.279	0.74854	7.46951
			45.37	3.703	1.41528	0.241681				55.961	1.825	1.74566	0.119111				60.302	6.591	0.748135	0.338501				42.976	153.783	0.533181	7.898					36.528	0.459	2.11516	0.0810924				14.26	38.776	0.825728	6.85063
			31.392	181.819	0.979251	11.8666				77.476	2.178	2.41681	0.14215				36.573	5.746	0.453742	0.295104				81.807	116.239	1.01494	5.96981					39.493	0.433	2.28685	0.0764989				11.097	44.292	0.642574	7.82515
			21.571	89.408	0.672892	5.83532				30.439	1.807	0.949523	0.117936				48.961	5.288	0.607433	0.271582				76.24	16.216	0.94587	0.832823					6.045	6.449	0.350037	1.13936				14.751	42.393	0.854159	7.48965
			16.718	71.365	0.521506	4.65772				47.661	2.176	1.48675	0.142019				29.606	5.386	0.367306	0.276615				73.556	114.462	0.912571	5.87855					10.871	5.342	0.629487	0.943781				7.003	27.042	0.40551	4.77756
			23.125	22.511	0.721368	1.46921				55.818	1.858	1.7412	0.121265				61.683	5.016	0.765269	0.257612				196.309	12.642	2.4355	0.649269					10.643	9.706	0.616285	1.71478				10.403	30.31	0.602388	5.35492
			37.637	65.861	1.17406	4.2985				59.441	1.872	1.85422	0.122178				29.93	5.656	0.371326	0.290481				62.712	176.943	0.778035	9.08745					8.548	6.563	0.494973	1.1595				10.702	36.781	0.619701	6.49817
			30.506	3.276	0.951613	0.213812				61.887	1.98	1.93052	0.129227				68.835	5.871	0.854	0.301523				62.532	155.828	0.775802	8.00303					20.008	0.96	1.15857	0.169605				15.971	48.215	0.924804	8.51823
			17.547	17.244	0.547366	1.12545				14.032	70.576	0.437718	4.60623				28.129	4.892	0.348982	0.251244				184.403	14.784	2.28779	0.759278					9.932	15.718	0.575114	2.77693				12.428	37.902	0.719646	6.69622
			13.918	27.219	0.434162	1.77648				56.855	2.084	1.77355	0.136015				59.451	4.709	0.737577	0.241845				165.486	12.62	2.0531	0.648139					35.156	0.52	2.03571	0.0918694				7.835	7.656	0.453687	1.3526
			13.855	18.436	0.432197	1.20325				18.211	74.313	0.568079	4.85013				36.133	5.454	0.448283	0.280107				74.935	14.631	0.929679	0.75142					8.817	9.416	0.51055	1.66354				14.328	37.106	0.829665	6.55559
			19.578	2.822	0.610722	0.184181				10.572	40.357	0.329786	2.63395				48.439	5.181	0.600957	0.266086				63.772	169.382	0.791186	8.69913					33.009	0.487	1.91139	0.0860392				9.477	49.585	0.548767	8.76027
			52.548	3.012	1.6392	0.196582				7.137	94.793	0.222634	6.18678				28.811	5.594	0.357443	0.287297				168.968	13.861	2.0963	0.711874					30.114	0.669	1.74376	0.118193				17.322	51.483	1.00303	9.0956
			41.778	2.38	1.30323	0.155334				12.455	50.091	0.388525	3.26925				36.94	5.661	0.458295	0.290738				61.484	159.028	0.7628	8.16737					1.931	3.389	0.111815	0.598741				15.517	50.294	0.898515	8.88553
			41.635	2.443	1.29877	0.159445				10.092	49.429	0.314813	3.22604				30.7	6.046	0.380879	0.310511				126.284	13.446	1.56674	0.690561					27.688	0.568	1.60328	0.10035				7.139	17.687	0.413385	3.12479
			66.865	2.339	2.08581	0.152658				3.869	13.409	0.120691	0.875155				45.348	5.035	0.562609	0.258588				67.037	181.579	0.831693	9.32555					30.265	0.595	1.7525	0.10512				18.607	53.298	1.07744	9.41626
			21.279	46.354	0.663783	3.02535				11.716	80.479	0.365472	5.25256				64.216	5.316	0.796694	0.27302				79.232	124.382	0.98299	6.38802					35.688	0.535	2.06652	0.0945194				8.468	40.6	0.490341	7.17288
			34.491	2.773	1.07592	0.180983				22.167	103.604	0.691483	6.76184				36.835	5.173	0.456993	0.265675				20.863	15.829	0.258836	0.812947					20.397	0.651	1.18109	0.115013				14.495	51.224	0.839336	9.04984
			23.074	47.303	0.719777	3.08729				16.614	92.927	0.518262	6.06499				61.811	6.207	0.766857	0.31878				211.67	13.912	2.62608	0.714494					6.09	19.781	0.352643	3.49475				10.352	23.945	0.599434	4.23041
			20.663	61.646	0.644567	4.0234				20.469	42.103	0.638516	2.7479				59.038	5.122	0.732454	0.263056				147.908	31.987	1.83502	1.64279					9.553	4.685	0.553168	0.827708				13.85	63.212	0.801987	11.1678
			48.606	2.485	1.51623	0.162187				76.932	2.65	2.39984	0.172955				56.084	5.839	0.695805	0.29988				68.394	116.61	0.848529	5.98887					51.592	0.48	2.98744	0.0848025				14.387	57.914	0.833082	10.2318
			19.628	64.265	0.612281	4.19433				19.767	48.082	0.616617	3.13813				49.964	5.297	0.619877	0.272044				94.47	26.596	1.17204	1.36592					41.61	0.549	2.40943	0.0969928				10.612	58.262	0.61449	10.2933
			27.452	3.3	0.856345	0.215379				17.508	101.904	0.546149	6.65089				34.827	5.474	0.43208	0.281134				49.245	106	0.610957	5.44396					37.86	0.91	2.19229	0.160771				11.431	55.411	0.661914	9.78956
			46.541	2.858	1.45181	0.186531				67.12	2.272	2.09376	0.148285				57.514	5.809	0.713546	0.298339				36.918	178.16	0.458022	9.14996					48.371	0.493	2.80093	0.0870992				17.345	62.195	1.00437	10.9881
			57.62	3.405	1.79741	0.222231				77.538	2.274	2.41874	0.148415				24.495	8.106	0.303897	0.416309				57.545	130.43	0.713931	6.69863					30.924	0.544	1.79066	0.0961095				14.262	61.268	0.825844	10.8243
			33.931	6.645	1.05845	0.433694				66.138	1.885	2.06313	0.123027				42.821	5.183	0.531258	0.266189				133.261	13.604	1.6533	0.698675					14.823	19.278	0.858329	3.40588				56.833	0.419	3.29093	0.0740255
			36.033	2.472	1.12402	0.161338				14.084	54.862	0.43934	3.58064				40.187	5.601	0.498579	0.287657				133.555	16.916	1.65695	0.868773					10.276	53.759	0.595034	9.4977				23.536	0.281	1.36286	0.0496448
			32.242	2.485	1.00577	0.162187				19.004	40.38	0.592816	2.63545				76.646	5.721	0.950907	0.29382				60.192	12.955	0.746771	0.665344					8.869	22.89	0.513561	4.04402				9.501	50.146	0.550157	8.85939
			37.078	97.206	1.15662	6.34427				92.907	1.757	2.89817	0.114673				74.758	5.877	0.927483	0.301831				95.324	23.53	1.18263	1.20846					54.469	0.616	3.15404	0.10883				18.324	59.347	1.06105	10.4849
			66.796	2.601	2.08365	0.169757				64.327	2.161	2.00663	0.14104				51.39	5.554	0.637569	0.285243				47.643	125.163	0.591082	6.42813					40.653	0.669	2.35402	0.118193				54.483	0.518	3.15485	0.091516
			65.888	2.097	2.05533	0.136863				65.321	2.153	2.03764	0.140518				60.201	5.419	0.746882	0.278309				91.652	16.645	1.13708	0.854855					12.379	19.157	0.716808	3.3845				15.367	59.488	0.889829	10.5099
			36.351	3.237	1.13394	0.211267				80.087	2.698	2.49826	0.176088				32.943	8.66	0.408707	0.444761				32.246	101.82	0.400059	5.22928					45.493	0.637	2.63428	0.11254				8.918	53.462	0.516398	9.44523
			46.738	4.875	1.45796	0.318173				9.888	51.191	0.308449	3.34104				53.755	5.481	0.66691	0.281494				50.351	174.141	0.624678	8.94355					65.64	0.52	3.8009	0.0918694				14.746	54.421	0.85387	9.61466
			54.306	2.66	1.69404	0.173608				61.943	2.574	1.93227	0.167995				35.612	5.9	0.441819	0.303013				38.221	80.658	0.474188	4.14244					44.307	0.556	2.5656	0.0982295				5.084	22.817	0.29439	4.03112
			43.731	2.945	1.36416	0.192209				105.576	2.288	3.29337	0.149329				28.369	6.611	0.351959	0.339528				27.66	101.991	0.343163	5.23806					27.892	0.854	1.61509	0.150878				54.223	0.56	3.13979	0.0989362
			19.931	39.279	0.621733	2.56359				63.177	2.787	1.97076	0.181897				42.405	6.051	0.526097	0.310768				41.665	160.969	0.516916	8.26706					12.924	2.73	0.748367	0.482314				18.344	64.292	1.06221	11.3586
			28.969	2.581	0.903667	0.168452				33.892	2.915	1.05724	0.190251				46.647	5.88	0.578725	0.301985				40.418	82.048	0.501445	4.21383					8.306	21.15	0.48096	3.73661				18.422	58.535	1.06673	10.3415
			33.762	3.059	1.05318	0.199649				11.779	56.136	0.367437	3.66378				36.714	59.579	0.455491	3.05986				53.752	156.416	0.666873	8.03323					41.44	1.307	2.39959	0.23091				70.113	0.669	4.05991	0.118193
			32.744	3.277	1.02143	0.213877				74.548	2.118	2.32547	0.138234				72.982	5.247	0.905449	0.269476				43.411	63.179	0.538578	3.24475					42.689	0.533	2.47191	0.0941661				26.556	0.331	1.53773	0.0584784
			11.994	5.832	0.374144	0.380633				115.954	2.043	3.6171	0.133339				68.086	5.619	0.844707	0.288581				24.227	52.129	0.300572	2.67725					6.87	1.794	0.397809	0.316949				47.711	0.741	2.76271	0.130914
			48.967	2.951	1.52749	0.192601				112.929	1.967	3.52274	0.128379				24.528	7.11	0.304306	0.365156				41.765	82.073	0.518156	4.21511					17.685	3.096	1.02405	0.546976				51.117	0.421	2.95994	0.0743788
			75.319	2.683	2.34952	0.175109				14.07	97.808	0.438903	6.38356				27.195	7.285	0.337394	0.374144				21.708	58.519	0.26932	3.00542					15.404	2.422	0.891971	0.427899				15.84	60.038	0.917218	10.607
			52.178	2.615	1.62765	0.170671				17.307	117.948	0.539879	7.69802				81.569	6.578	1.01198	0.337833				31.55	121.246	0.391424	6.22696					59.134	0.718	3.42417	0.12685				74.921	0.658	4.33831	0.11625
			21.456	1.823	0.669304	0.11898				72.51	2.758	2.2619	0.180004				60.823	5.968	0.754599	0.306505				54.357	233.172	0.674379	11.9753					10.908	3.94	0.63163	0.696087				44.514	0.647	2.57759	0.114307
			36.182	2.957	1.12867	0.192992				60.488	3.127	1.88688	0.204087				73.725	5.926	0.914667	0.304348				48.126	162.285	0.597074	8.33465					8.167	8.318	0.472912	1.46956				59.987	0.621	3.47356	0.109713
			49.241	2.828	1.53604	0.184573				90.578	3.241	2.82551	0.211528				52.941	57.245	0.656811	2.93999				38.331	196.742	0.475553	10.1043					7.117	1.914	0.412111	0.33815				14.167	51.765	0.820343	9.14542
			46.36	2.22	1.44617	0.144891				68.785	3.604	2.1457	0.235219				58.233	6.177	0.722466	0.317239				87.295	73.563	1.08302	3.77805					8.664	2.8	0.50169	0.494681				13.299	49.356	0.770081	8.71982
			38.512	87.802	1.20135	5.7305				15.039	83.788	0.469131	5.46853				71.352	6.288	0.885227	0.32294				53.524	216.375	0.664044	11.1126					14.408	3.811	0.834298	0.673296				47.196	0.683	2.73289	0.120667
			46.756	2.429	1.45852	0.158532				59.356	2.565	1.85157	0.167408				94.382	7.627	1.17095	0.391708				25.169	109.44	0.312259	5.62063					54.545	0.67	3.15844	0.11837				16.053	57.178	0.929552	10.1017
			49.94	2.685	1.55784	0.17524				40.975	3.049	1.27819	0.198997				56.108	9.025	0.696103	0.463507				43.53	44.848	0.540054	2.30331					7.19	7.366	0.416338	1.30136				10.498	52.786	0.607889	9.3258
			32.284	80.85	1.00708	5.27677				91.542	2.684	2.85559	0.175175				52.439	27.086	0.650583	1.39108				51.926	197.161	0.644219	10.1258					10.629	17.224	0.615474	3.043				50.679	0.594	2.93458	0.104943
			43.984	2.684	1.37205	0.175175				49.758	3.284	1.55216	0.214334				39.4	4.785	0.488815	0.245748				47.266	182.709	0.586404	9.38358					9.218	26.83	0.53377	4.74011				77.482	0.68	4.48661	0.120137
			34.197	76.133	1.06675	4.96891				83.903	3.238	2.61729	0.211332				28.041	5.243	0.34789	0.26927				63.069	91.168	0.782464	4.68221					13.386	4.119	0.775119	0.727711				6.527	24.355	0.377947	4.30284
			22.563	19.929	0.703836	1.30069				76.615	3.342	2.38995	0.21812				44.529	59.858	0.552448	3.07419				52.348	88.301	0.649454	4.53497					6.833	0.555	0.395666	0.0980529				12.828	38.096	0.742808	6.73049
			122.236	2.789	3.81306	0.182027				17.644	136.705	0.550392	8.92222				31.066	5.975	0.38542	0.306865				64.982	93.685	0.806198	4.81148					8.145	1.279	0.471638	0.225963				11.092	41.774	0.642284	7.38029
			48.902	2.583	1.52546	0.168583				76.301	5.153	2.38015	0.336317				55.108	4.948	0.683696	0.25412				74.326	111.226	0.922124	5.71235					5.136	11.456	0.297401	2.02395				8.948	34.51	0.518136	6.09695
			23.648	2.766	0.737682	0.180526				16.086	48.521	0.501791	3.16678				61.413	5.549	0.761919	0.284986				74.704	76.971	0.926813	3.95308					7.38	0.706	0.42734	0.12473				14.145	35.049	0.819069	6.19217
			24.808	2.56	0.773868	0.167082				28.094	3.839	0.876372	0.250557				58.78	5.17	0.729253	0.265521				43.025	172.945	0.533789	8.88212					5.591	0.913	0.323748	0.161301				9.42	40.075	0.545467	7.08012
			27.753	46.822	0.865735	3.05589				60.686	3.969	1.89306	0.259042				32.745	5.1	0.40625	0.261926				56.7	112.117	0.703447	5.75811					9.389	1.184	0.543672	0.209179				11.462	43.892	0.663709	7.75448
			53.636	2.105	1.67314	0.137385				65.502	13.933	2.04329	0.909354				32.224	5.301	0.399786	0.272249				40.585	62.856	0.503517	3.22816					10.428	6.547	0.603835	1.15667				15.892	39.485	0.920229	6.97589
			73.462	2.27	2.29159	0.148154				60.973	4.522	1.90201	0.295134				42.501	4.754	0.527288	0.244156				81.652	85.175	1.01301	4.37442					7.205	1.597	0.417207	0.282145				8.948	31.516	0.518136	5.56799
			52.235	35.072	1.62943	2.28902				20.66	53.906	0.644474	3.51824				38.949	4.83	0.48322	0.24806				42.476	98.461	0.526977	5.05677					7.746	0.743	0.448534	0.131267				1.884	0.764	0.109093	0.134977
			34.672	24.438	1.08157	1.59498				34.281	19.046	1.06937	1.24306				59.255	5.088	0.735146	0.26131				53.208	70.303	0.660124	3.61063					13.273	6.465	0.768575	1.14218				14.144	35.416	0.819011	6.25701
			88.146	2.497	2.74965	0.16297				25.405	65.422	0.792491	4.26985				35.629	5.184	0.44203	0.26624				64.772	68.032	0.803592	3.49399					6.911	1.161	0.400183	0.205116				12.051	42.306	0.697815	7.47428
			32.133	18.183	1.00237	1.18674				35.438	19.568	1.10546	1.27713				25.834	5.514	0.320509	0.283188				71.91	70.704	0.89215	3.63122					4.842	0.931	0.280377	0.164481				8.837	30.106	0.511708	5.31888
			90.061	2.454	2.80939	0.160163				97.023	3.724	3.02656	0.243051				64.838	6.446	0.804411	0.331054				157.889	106.417	1.95885	5.46537					3.146	0.501	0.18217	0.0885126				10.921	47.083	0.632382	8.31824
			22.748	17.412	0.709607	1.13642				87.959	4.569	2.74382	0.298201				58.736	5.154	0.728707	0.2647				33.789	170.985	0.419202	8.78146					9.283	0.879	0.537534	0.155295				11.728	45.06	0.679112	7.96083
			33.519	3.215	1.0456	0.209831				19.373	3.007	0.604327	0.196256				49.952	5.781	0.619728	0.296901				53.203	195.521	0.660062	10.0416					8.434	1.339	0.488372	0.236564				11.964	21.314	0.692778	3.76558
			37.03	69.351	1.15512	4.52628				39.288	2.84	1.22556	0.185356				43.535	4.972	0.540116	0.255352				60.017	187.127	0.744599	9.61048					4.292	1.067	0.248529	0.188509				38.08	0.355	2.20503	0.0627185
			35.04	4.731	1.09305	0.308774				66.798	2.918	2.08372	0.190447				32.666	5.208	0.40527	0.267473				46.742	143.783	0.579903	7.38442					9.051	1.623	0.5241	0.286738				46.289	0.379	2.68037	0.0669586
			28.805	6.117	0.898551	0.399233				38.617	2.899	1.20463	0.189207				41.165	4.79	0.510713	0.246005				50.818	111.671	0.630472	5.73521					6.108	4.044	0.353685	0.714461				7.864	17.037	0.455366	3.00996
			39.775	21.572	1.24075	1.40792				86.415	3.779	2.69565	0.246641				22.786	7.422	0.282694	0.38118				47.536	183.535	0.589754	9.426					8.137	2.106	0.471174	0.372071				13.371	49.853	0.77425	8.80762
			36.112	2.319	1.12649	0.151352				95.397	3.54	2.97584	0.231042				77.936	6.062	0.966911	0.311333				39.693	95.427	0.49245	4.90095					6.391	1.397	0.370072	0.246811				6.058	23.019	0.35079	4.06681
			55.23	2.907	1.72286	0.189729				62.534	4.489	1.9507	0.29298				37.353	5.301	0.463419	0.272249				29.984	163.24	0.371996	8.38369					7.047	0.317	0.408058	0.056005				7.781	28.289	0.45056	4.99787
			33.375	22.537	1.04111	1.4709				112.115	3.247	3.49735	0.211919				42.179	5.324	0.523293	0.27343				56.473	180.707	0.700631	9.28076					6.864	1.005	0.397461	0.177555				11.619	38.929	0.6728	6.87766
			26.162	3.601	0.816105	0.235024				75.863	3.587	2.36649	0.23411				67.709	5.681	0.84003	0.291765				59.029	132.982	0.732342	6.8297					4.843	0.611	0.280435	0.107946				10.051	28.595	0.582005	5.05193
			23.229	9.319	0.724612	0.608216				90.941	3.444	2.83684	0.224777				54.511	4.947	0.676289	0.254068				65.064	198.72	0.807215	10.2059					6.551	0.695	0.379337	0.122787				8.119	27.298	0.470132	4.82279
			24.923	11.041	0.777455	0.720604				94.264	3.581	2.9405	0.233718				29.397	8.289	0.364713	0.425707				35.383	179.631	0.438978	9.2255					10.772	3.539	0.623755	0.625242				5.694	27.17	0.329712	4.80017
			31.528	34.905	0.983493	2.27812				22.086	79.353	0.688957	5.17907				49.519	5.265	0.614356	0.2704				55.795	103.282	0.692219	5.30437					20.01	0.45	1.15868	0.0795023				6.974	27.651	0.403831	4.88515
			11.228	8.468	0.350249	0.552674				106.414	3.856	3.31951	0.251667				52.25	5.173	0.648238	0.265675				36.209	78.103	0.449226	4.01122					15.392	0.859	0.891277	0.151761				10.253	33.406	0.593702	5.9019
			18.297	20.288	0.570762	1.32412				105.372	3.88	3.287	0.253233				34.162	5.992	0.42383	0.307738				50.567	184.11	0.627358	9.45554					23.08	0.441	1.33645	0.0779123				13.397	41.576	0.775756	7.34531
			15.705	8.05	0.489906	0.525393				53.569	3.254	1.67105	0.212376				33.955	56.856	0.421262	2.92001				61.34	127.598	0.761013	6.55319					12.428	1.15	0.719646	0.203173				24.366	0.562	1.41092	0.0992896
			32.675	77.045	1.01927	5.02844				30.152	75.135	0.94057	4.90378				26.88	6.355	0.333486	0.326381				38.57	149.014	0.478518	7.65307					9.63	1.05	0.557627	0.185505				6.996	25.164	0.405105	4.44577
			14.517	8.536	0.452847	0.557112				90.814	3.108	2.83288	0.202847				39.691	5.972	0.492425	0.30671				44.203	210.625	0.548403	10.8173					6.457	0.569	0.373894	0.100526				18.748	16.808	1.08561	2.9695
			9.847	8.854	0.30717	0.577867				22.93	100.817	0.715285	6.57994				42.579	6.011	0.528255	0.308713				62.259	226.09	0.772415	11.6115					10.588	0.609	0.6131	0.107593				23.181	2.282	1.3423	0.403165
			11.689	40.623	0.36463	2.65131				91.98	3.912	2.86925	0.255321				32.297	52.374	0.400692	2.68983				64.259	131.672	0.797228	6.76242					21.257	0.454	1.23089	0.080209				24.56	2.295	1.42215	0.405462
			39.615	81.397	1.23576	5.31247				97.992	3.587	3.05679	0.23411				34.431	70.934	0.427167	3.64303				46.39	115.725	0.575536	5.94341					8.392	1.067	0.48594	0.188509				5.674	22.054	0.328554	3.89632
			10.992	39.058	0.342887	2.54917				72.913	3.371	2.27447	0.220012				58.561	4.686	0.726536	0.240664				45.912	128.474	0.569606	6.59818					9.331	0.462	0.540313	0.0816224				7.494	34.63	0.433941	6.11815
			22.126	18.049	0.690205	1.17799				115.768	3.343	3.6113	0.218185				62.983	4.919	0.781397	0.25263				66.425	106.119	0.8241	5.45007					16.406	0.766	0.949992	0.135331				12.261	31.311	0.709975	5.53177
			45.188	3.592	1.40961	0.234436				104.636	4.07	3.26404	0.265634				28.257	7.549	0.35057	0.387702				24.965	140.001	0.309728	7.19018					9.06	1.222	0.524621	0.215893				13.149	36.93	0.761395	6.52449
			116.498	2.858	3.63407	0.186531				12.349	113.985	0.385218	7.43937				75.603	6.086	0.937967	0.312565				63.928	105.053	0.793121	5.39532					9.067	2.727	0.525026	0.481784				23.12	11.613	1.33877	2.05169
			35.683	3.189	1.11311	0.208134				109.679	4.155	3.42136	0.271181				56.363	5.835	0.699266	0.299674				41.222	174.936	0.51142	8.98438					6.969	3.398	0.403541	0.600331				27.972	14.09	1.61972	2.48931
			23.57	21.233	0.735249	1.3858				94.551	3.401	2.94945	0.22197				72.81	5.915	0.903316	0.303783				55.456	199.934	0.688014	10.2682					9.844	0.776	0.570019	0.137097				29.421	2.562	1.70363	0.452633
			14.997	23.368	0.467821	1.52514				50.033	81.559	1.56074	5.32305				48.456	56.735	0.601168	2.9138				50.95	192.367	0.63211	9.8796					7.797	0.66	0.451487	0.116603				46.055	0.743	2.66682	0.131267
			11.02	15.906	0.343761	1.03812				76.061	3.721	2.37267	0.242856				51.662	5.921	0.640943	0.304091				59.668	222.029	0.74027	11.403					17.597	0.761	1.01896	0.134447				29.968	0.793	1.7353	0.140101
			9.244	12.84	0.28836	0.838018				117.649	3.846	3.66998	0.251014				62.341	6.087	0.773432	0.312617				52.781	100.007	0.654826	5.13617					5.954	0.72	0.344767	0.127204				63.764	0.385	3.69227	0.0680187
			78.449	2.89	2.44716	0.188619				57.952	5.784	1.80777	0.3775				40.489	16.247	0.502326	0.834415				57.12	218.248	0.708658	11.2088					16.34	0.446	0.946171	0.0787956				52.399	0.366	3.03417	0.0646619
			30.743	2.385	0.959006	0.15566				105.444	3.456	3.28925	0.22556				80.584	7.326	0.999763	0.376249				38.187	179.092	0.473766	9.19782					9.447	1.381	0.54703	0.243984				34.298	0.352	1.98603	0.0621885
			50.428	97.826	1.57306	6.38473				88.382	3.85	2.75701	0.251275				47.18	18.712	0.585338	0.961012				47.75	192.439	0.592409	9.8833					18.746	0.436	1.08549	0.0770289				12.699	39.61	0.735338	6.99797
			55.121	2.471	1.71946	0.161273				48.864	111.233	1.52428	7.25976				45.267	8.364	0.561604	0.429559				67.439	159.218	0.83668	8.17713					9.606	0.571	0.556237	0.10088				37.708	0.381	2.18349	0.067312
			52.304	2.901	1.63159	0.189337				114.089	4.501	3.55892	0.293763				54.093	20.584	0.671103	1.05715				53.732	134.306	0.666625	6.8977					16.514	0.413	0.956246	0.0729655				40.589	0.878	2.35031	0.155118
			56.269	2.643	1.75527	0.172499				83.58	3.483	2.60722	0.227322				45.619	25.676	0.565971	1.31867				58.026	86.23	0.719898	4.42861					7.41	0.732	0.429077	0.129324				7.944	37.812	0.459999	6.68032
			15.72	22.558	0.490374	1.47228				117.979	3.977	3.68027	0.259564				39.96	10.277	0.495763	0.527807				52.772	210.93	0.654715	10.833					20.566	0.747	1.19088	0.131974				13.913	23.75	0.805635	4.19596
			25.045	2.72	0.781261	0.177524				87.165	4.165	2.71905	0.271834				62.82	34.977	0.779375	1.79635				50.269	130.95	0.623661	6.72534					19.469	0.967	1.12736	0.170842				3.485	18.096	0.2018	3.19705
			14.722	44.304	0.459242	2.89155				60.774	4.241	1.8958	0.276794				42.089	6.697	0.522176	0.343945				53.423	161.14	0.662791	8.27584					39.025	0.338	2.25975	0.0597151				52.892	0.347	3.06272	0.0613051
			27.472	3.369	0.856969	0.219882				107.18	3.718	3.3434	0.24266				25.843	12.425	0.320621	0.638124				69.1	193.74	0.857287	9.95011					20.053	0.261	1.16117	0.0461114				6.686	37.654	0.387154	6.6524
			12.905	20.031	0.402562	1.30735				106.71	3.921	3.32874	0.255909				25.83	53.428	0.320459	2.74396				66.186	222.471	0.821135	11.4257					17.944	0.206	1.03905	0.0363944				9.486	37.07	0.549289	6.54923
			16.116	28.807	0.502727	1.88012				54.947	4.508	1.71403	0.29422				58.696	13.34	0.728211	0.685117				48.21	211.573	0.598116	10.866					21.808	0.284	1.2628	0.0501748				50.549	0.512	2.92705	0.090456
			16.334	36.551	0.509527	2.38555				104.618	3.478	3.26348	0.226996				45.079	12.828	0.559272	0.658821				45.275	190.643	0.561703	9.79106					21.877	0.237	1.26679	0.0418712				25.957	0.296	1.50304	0.0522949
			51.209	2.373	1.59743	0.154877				66.147	2.013	2.06341	0.131381				36.201	12.259	0.449127	0.629599				64.337	228.712	0.798195	11.7462					18.066	0.244	1.04612	0.0431079				46.524	0.429	2.69398	0.0757922
			48.245	2.618	1.50497	0.170867				50.645	2.198	1.57983	0.143455				46.222	10.838	0.573452	0.556619				69.478	242.121	0.861977	12.4349					31.068	0.388	1.799	0.0685487				48.787	0.329	2.82502	0.058125
			13.993	23.88	0.436501	1.55856				22.533	65.398	0.702901	4.26828				32.664	62.496	0.405245	3.20967				62.509	217.996	0.775516	11.1959					21.077	0.327	1.22047	0.0577717				9.003	11.899	0.52132	2.10222
			28.789	1.411	0.898052	0.0920906				90.958	3.551	2.83737	0.23176				69.124	12.517	0.857585	0.642849				69.897	205.643	0.867175	10.5614					22.583	0.262	1.30767	0.046288				11.381	5.192	0.659019	0.91728
			14.682	21.574	0.457994	1.40805				20.132	126.824	0.628003	8.27732				50.326	9.468	0.624368	0.486258				47.187	86.043	0.585424	4.419					21.215	0.291	1.22846	0.0514115				5.08	8.937	0.294158	1.57892
			27.95	1.386	0.87188	0.090459				37.947	1.943	1.18373	0.126812				110.113	14.902	1.36611	0.765338				47.268	175.346	0.586429	9.00543					13.123	0.361	0.75989	0.0637785				6.341	9.011	0.367177	1.59199
			7.805	28.158	0.243471	1.83777				22.808	97.265	0.711479	6.34812				77.016	14.401	0.955497	0.739608				55.449	58.888	0.687927	3.02437					17.82	0.288	1.03187	0.0508815				45.427	0.458	2.63046	0.0809157
			20.642	1.279	0.643912	0.0834755				23.742	91.966	0.740614	6.00227				51.466	18.427	0.638512	0.946375				129.478	79.684	1.60637	4.09242					18.202	0.293	1.05399	0.0517649				6.233	0.752	0.360923	0.132857
			16.092	1.274	0.501978	0.0831492				18.627	80.381	0.581056	5.24616				45.605	11.55	0.565797	0.593186				52.463	106.92	0.650881	5.49121					19.993	0.244	1.1577	0.0431079				3.423	0.709	0.198209	0.12526
			11.531	54.736	0.359701	3.57241				28.983	66.197	0.904104	4.32043				59.464	11.595	0.737739	0.595497				39.441	13.724	0.489324	0.704838					23.46	0.339	1.35846	0.0598918				7.048	0.609	0.408116	0.107593
			40.068	1.224	1.24989	0.0798858				21.271	49.794	0.663533	3.24987				92.636	14.683	1.14929	0.754091				127.404	11.898	1.58063	0.611058					19.868	0.255	1.15046	0.0450513				13.775	1.232	0.797644	0.21766
			26.648	1.216	0.831265	0.0793637				19.578	116.406	0.610722	7.59738				92.864	15.263	1.15211	0.783878				210.597	17.173	2.61277	0.881972					24.35	0.21	1.40999	0.0371011				9.894	0.755	0.572914	0.133387
			37.076	8.847	1.15656	0.57741				3.75	20.537	0.116979	1.34037				83.815	14.737	1.03985	0.756864				211.384	14.883	2.62253	0.764362					17.831	0.408	1.03251	0.0720821				6.127	0.638	0.354785	0.112717
			19.449	1.41	0.606697	0.0920254				19.157	68.884	0.597589	4.4958				56.108	13.82	0.696103	0.709769				39.427	162.943	0.48915	8.36844					12.423	0.318	0.719356	0.0561816				5.561	0.565	0.322011	0.0998196
			5.653	16.995	0.176341	1.1092				20.565	69.534	0.64151	4.53822				69.798	13.662	0.865947	0.701654				34.814	14.408	0.431919	0.739967					24.042	0.348	1.39216	0.0614818				5.401	0.642	0.312746	0.113423
			26.491	1.302	0.826368	0.0849766				10.5	26.828	0.32754	1.75096				92.319	15.594	1.14535	0.800878				49.352	165.314	0.612284	8.49021					24.159	0.335	1.39893	0.0591851				10.831	0.817	0.627171	0.144341
			12.151	8.835	0.379042	0.576627				19.955	70.107	0.622482	4.57562				123.912	13.678	1.53731	0.702476				108.676	29.673	1.34829	1.52395					27.293	0.314	1.58041	0.055475				9.111	0.939	0.527574	0.165895
			34.794	1.068	1.08537	0.0697043				19.887	63.357	0.620361	4.13507				101.053	15.255	1.25371	0.783467				116.169	28.042	1.44125	1.44018					27.896	0.356	1.61532	0.0628952				7.927	1.175	0.459014	0.207589
			24.765	1.218	0.772526	0.0794943				20.54	96.721	0.64073	6.31261				80.452	20.556	0.998126	1.05572				53.666	182.562	0.665806	9.37603					15.718	0.2	0.910154	0.0353344				6.504	1.266	0.376615	0.223667
			9.523	6.419	0.297063	0.418944				10.304	43.758	0.321426	2.85592				52.874	14.331	0.65598	0.736013				181.955	14.394	2.25742	0.739248					34.363	0.322	1.9898	0.0568883				7.567	0.866	0.438169	0.152998
			22.715	1.715	0.708578	0.111932				25.364	69.044	0.791212	4.50624				86.927	14.305	1.07846	0.734677				191.014	13.627	2.36981	0.699857					18.974	0.245	1.09869	0.0432846				5.778	1.089	0.334576	0.192396
			38.072	1.233	1.18763	0.0804732				53.237	103.67	1.66069	6.76615				83.387	15.413	1.03454	0.791582				59.182	74.796	0.73424	3.84138					20.889	0.339	1.20958	0.0598918				5.36	0.799	0.310372	0.141161
			6.81	18.557	0.212433	1.21115				54.439	99.432	1.69819	6.48955				137.302	14.985	1.70343	0.769601				109.136	94.951	1.35399	4.8765					16.046	0.313	0.929147	0.0552983				4.492	0.996	0.26011	0.175965
			16.63	1.646	0.518761	0.107428				23.762	120.172	0.741238	7.84317				56.345	16.049	0.699043	0.824246				31.338	57.844	0.388794	2.97076					21.725	0.372	1.25799	0.0657219				9.531	0.792	0.551894	0.139924
			20.609	2.611	0.642883	0.17041				19.37	101.236	0.604233	6.60729				54.829	15.158	0.680235	0.778486				163.393	13.537	2.02713	0.695234					17.334	0.335	1.00373	0.0591851				14.811	2.864	0.857634	0.505988
			15.405	2.119	0.480548	0.138299				16.726	116.294	0.521755	7.59007				46.078	17.545	0.571666	0.901077				166.841	15.718	2.06991	0.807246					5.161	0.517	0.298849	0.0913393				3.441	0.545	0.199252	0.0962862
			14.702	16.379	0.458618	1.069				49.38	85.127	1.54037	5.55592				78.103	15.308	0.968983	0.786189				173.154	10.361	2.14823	0.532121					20.424	0.28	1.18266	0.0494681				6.271	0.901	0.363123	0.159181
			21.92	1.62	0.683778	0.105731				18.132	62.098	0.565615	4.0529				69.2	16.524	0.858528	0.848641				57.937	71.476	0.718794	3.67087					17.329	0.311	1.00344	0.0549449				10.038	0.672	0.581252	0.118723
			22.444	1.185	0.700124	0.0773405				20.978	80.704	0.654393	5.26724				68.596	18.701	0.851035	0.960447				15.18	154.431	0.18833	7.93128					29.019	0.511	1.68035	0.0902793				7.418	0.944	0.429541	0.166778
			18.906	1.142	0.589759	0.074534				19.739	148.263	0.615744	9.67657				99.049	15.251	1.22885	0.783262				18.489	69.255	0.229383	3.5568					26.94	0.372	1.55997	0.0657219				8.687	1.264	0.503022	0.223313
			50.775	11.312	1.58389	0.738291				25.073	105.627	0.782134	6.89387				88.612	12.512	1.09936	0.642592				15.391	153.975	0.190948	7.90786					19.695	0.406	1.14044	0.0717288				8.462	2.029	0.489994	0.358467
			41.995	1.55	1.31	0.101163				14.22	56.304	0.443583	3.67475				91.956	14.272	1.14085	0.732982				38.17	54.757	0.473555	2.81221					21.68	0.402	1.25538	0.0710221				11.73	0.888	0.679228	0.156885
			41.842	1.224	1.30523	0.0798858				24.225	69.498	0.755681	4.53587				100.449	15.255	1.24622	0.783467				42.928	60.411	0.532585	3.10259					25.776	0.424	1.49256	0.0749089				7.806	1.062	0.452008	0.187625
			25.892	1.397	0.807682	0.0911769				19.899	80.917	0.620735	5.28115				39.789	14.14	0.493641	0.726203				45.217	52.515	0.560984	2.69707					31.363	0.34	1.81608	0.0600684				4.674	1.279	0.270649	0.225963
			17.361	1.379	0.541564	0.0900021				21.128	91.054	0.659073	5.94275				106.228	13.584	1.31792	0.697648				46.029	92.17	0.571058	4.73367					31.734	0.32	1.83756	0.056535				11.113	0.757	0.6435	0.133741
			36.576	1.712	1.14096	0.111736				26.931	111.703	0.840093	7.29043				108.278	15.674	1.34335	0.804987				58.632	59.892	0.727416	3.07594					20.01	0.325	1.15868	0.0574183				8.157	1.116	0.472333	0.197166
			11.953	1.385	0.372865	0.0903937				23.764	99.755	0.741301	6.51063				85.753	15.626	1.06389	0.802521				55.774	143.918	0.691959	7.39135					21.477	0.442	1.24363	0.078089				7.467	1.074	0.432378	0.189746
			92.001	1.485	2.8699	0.0969203				22.693	55.676	0.707892	3.63376				61.741	41.222	0.765988	2.11708				34.507	81.937	0.42811	4.20813					21.552	0.367	1.24797	0.0648386				7.468	1.033	0.432436	0.182502
			29.076	1.427	0.907005	0.0931349				17.761	44.267	0.554042	2.88914				93.594	16.322	1.16117	0.838267				55.966	62.018	0.694341	3.18513					19.678	0.391	1.13946	0.0690787				7.052	0.82	0.408347	0.144871
			19.496	8.563	0.608164	0.558875				21.645	110.486	0.6752	7.211				42.425	98.783	0.526345	5.07331				42.39	140.435	0.525911	7.21247					30.676	0.461	1.7763	0.0814457				6.425	2.33	0.372041	0.411645
			23.164	1.327	0.722584	0.0866083				24.852	92.501	0.77524	6.03719				103.215	14.859	1.28053	0.76313				20.475	86.982	0.254023	4.46723					24.122	0.446	1.39679	0.0787956				8.051	1.247	0.466195	0.22031
			38.456	1.618	1.19961	0.105601				17.714	88.171	0.552575	5.75459				39.749	107.846	0.493145	5.53876				38.215	44.082	0.474113	2.26397					20.81	0.241	1.20501	0.0425779				8.983	1.741	0.520162	0.307586
			18.985	1.872	0.592223	0.122178				20.327	84.099	0.634086	5.48882				92.817	12.91	1.15153	0.663033				45.947	128.234	0.57004	6.58585					39.479	0.383	2.28604	0.0676653				8.702	0.736	0.503891	0.13003
			15.536	16.551	0.484634	1.08022				20.548	77.139	0.64098	5.03457				53.75	18.159	0.666848	0.932611				44.091	45.174	0.547014	2.32005					9.933	0.294	0.575172	0.0519415				7.783	0.742	0.450676	0.131091
			17.904	2.7	0.558502	0.176219				14.784	64.408	0.461176	4.20367				109.159	16.087	1.35428	0.826197				62.946	208.284	0.780938	10.6971					24.099	0.526	1.39546	0.0929294				5.013	1.179	0.290279	0.208296
			18.534	1.731	0.578155	0.112976				12.212	59.137	0.380944	3.85965				63.534	15.06	0.788233	0.773453				52.675	80.354	0.653511	4.12683					16.311	0.531	0.944491	0.0938127				8.548	0.715	0.494973	0.12632
			51.855	1.484	1.61758	0.0968551				20.91	112.13	0.652272	7.3183				131.406	15.821	1.63029	0.812536				69.477	176.28	0.861965	9.0534					25.28	0.435	1.46384	0.0768523				8.935	1.158	0.517383	0.204586
			12.698	1.327	0.396105	0.0866083				6.992	23.582	0.21811	1.53911				52.203	16.807	0.647655	0.863175				56.97	161.079	0.706797	8.27271					28.698	0.411	1.66176	0.0726121				7.387	1.303	0.427746	0.230203
			41.114	1.39	1.28252	0.09072				21.992	57.128	0.686024	3.72853				67.102	14.488	0.832499	0.744076				61.848	115.206	0.767316	5.91676					38.976	0.407	2.25691	0.0719054				4.6	1.002	0.266364	0.177025
			37.691	1.944	1.17574	0.126878				16.362	94.567	0.510401	6.17203				123.292	15.467	1.52962	0.794355				61.803	154.516	0.766757	7.93564					24.495	0.356	1.41839	0.0628952				4.655	0.867	0.269549	0.153174
			41.071	1.874	1.28118	0.122309				24.636	81.179	0.768502	5.29825				74.903	14.263	0.929282	0.73252				69.817	116.468	0.866183	5.98157					19.131	0.479	1.10778	0.0846258				4.122	1.358	0.238685	0.23992
			61.167	1.587	1.90806	0.103577				22.253	79.476	0.694166	5.1871				65.155	11.504	0.808344	0.590823												21.597	0.328	1.25058	0.0579484				8.47	1.017	0.490457	0.179675
			14.767	50.949	0.460646	3.32525				11.654	79.272	0.363538	5.17378				96.88	14.956	1.20194	0.768111												33.795	0.388	1.95691	0.0685487				8.373	1.694	0.48484	0.299282
			34.217	1.697	1.06737	0.110757				18.942	109.304	0.590882	7.13386				46.022	22.237	0.570971	1.14205												9.652	1.246	0.558901	0.220133				10.289	5.374	0.595786	0.949434
			15.068	58.535	0.470035	3.82036				21.033	55.668	0.656109	3.63324				73.5	12.84	0.911876	0.659438												20.718	0.367	1.19968	0.0648386				5.048	0.925	0.292305	0.163421
			32.679	101.791	1.0194	6.64351				17.162	134.277	0.535356	8.76375				84.033	12.112	1.04255	0.622049												20.31	0.397	1.17605	0.0701387				5.302	1.175	0.307013	0.207589
			37.614	1.572	1.17334	0.102598				20.58	111.39	0.641978	7.27				85.95	15.913	1.06634	0.817261												19.243	0.406	1.11427	0.0717288				6.921	0.931	0.400762	0.164481
			16.107	42.754	0.502446	2.79039				24.885	124.793	0.77627	8.14477				66.761	13.622	0.828269	0.6996												27.169	0.433	1.57323	0.0764989				5.723	0.95	0.331391	0.167838
			17.961	1.363	0.56028	0.0889579				13.774	38.752	0.42967	2.5292				62.257	12.44	0.77239	0.638894												15.616	0.465	0.904247	0.0821524				5.108	0.834	0.29578	0.147344
			18.974	74.625	0.59188	4.87049				24.112	124.216	0.752156	8.10711				125.419	13.5	1.55601	0.693334												17.815	0.446	1.03158	0.0787956				8.591	0.898	0.497463	0.158651
			17.966	12.121	0.560436	0.791092				18.29	137.948	0.570543	9.00334				85.635	13.793	1.06243	0.708382												12.222	1.52	0.707717	0.268541				7.151	1.061	0.41408	0.187449
			18.992	5.353	0.592442	0.34937				13.695	99.766	0.427206	6.51135				53.809	14.783	0.66758	0.759226												31.155	0.443	1.80404	0.0782656				12.414	0.814	0.718835	0.143811
			17.204	8.03	0.536666	0.524088				26.994	93.131	0.842058	6.07831				90.444	14.07	1.12209	0.722608												13.16	0.549	0.762032	0.0969928				9.671	2.024	0.560001	0.357584
			20.851	2.188	0.650432	0.142802				23.421	92.4	0.730601	6.0306				87.418	13.637	1.08455	0.70037												22.255	0.339	1.28868	0.0598918				6.247	1.792	0.361734	0.316596
			35.674	1.287	1.11282	0.0839976				20.727	88.225	0.646564	5.75811				32.643	10.693	0.404985	0.549172												15.841	0.574	0.917276	0.10141				5.962	1.002	0.345231	0.177025
			15.1	7.91	0.471034	0.516256				38.376	122.954	1.19711	8.02474				36.131	14.493	0.448258	0.744333												32.35	0.36	1.87323	0.0636019				6.043	1.114	0.349921	0.196812
			17.514	1.575	0.546337	0.102794				28.218	140.056	0.88024	9.14093				138.879	16.593	1.723	0.852185												13.201	7.999	0.764406	1.4132				11.159	1.2	0.646164	0.212006
			11.233	8.792	0.350405	0.573821				24.78	99.04	0.772994	6.46397				42.451	16.824	0.526667	0.864048												34.904	0.547	2.02112	0.0966395				10.444	0.828	0.604762	0.146284
			15.152	53.331	0.472656	3.48071				17.875	76.557	0.557598	4.99659				99.388	15.837	1.23305	0.813358												26.208	0.464	1.51758	0.0819757				8.647	1.115	0.500706	0.196989
			20.914	53.939	0.652397	3.52039				26.051	121.596	0.812642	7.93611				96.68	15.538	1.19946	0.798002												25.468	0.38	1.47473	0.0671353				8.378	1.667	0.48513	0.294512
			14.699	56.785	0.458525	3.70614				24.418	104.107	0.761702	6.79467				108.521	14.607	1.34636	0.750187												17.792	0.378	1.03025	0.066782				9.258	0.985	0.536086	0.174022
			13.744	56.963	0.428734	3.71776				24.423	106.823	0.761858	6.97193				74.755	13.419	0.927446	0.689174												26.239	0.354	1.51937	0.0625418				6.358	7.352	0.368161	1.29889
			72.287	1.805	2.25494	0.117806				28.244	126.292	0.881051	8.2426				135.416	15.322	1.68004	0.786908												24.594	0.411	1.42412	0.0726121				7.874	1.039	0.455945	0.183562
			20.089	55.779	0.626662	3.64048				22.287	95.438	0.695227	6.22888				107.969	14.46	1.33951	0.742638												24.741	0.396	1.43263	0.0699621				7.179	1.192	0.415701	0.210593
			35.067	1.254	1.09389	0.0818438				11.101	64.318	0.346288	4.19779				80.333	16.089	0.996649	0.8263												21.902	0.381	1.26824	0.067312				3.042	0.713	0.176148	0.125967
			24.596	1.498	0.767254	0.0977688				33.183	179.621	1.03512	11.7232				105.693	15.919	1.31128	0.817569												20.761	0.434	1.20217	0.0766756				9.259	0.846	0.536144	0.149464
			23.839	1.714	0.74364	0.111866				27.028	180.803	0.843119	11.8003				107.631	12.587	1.33532	0.646444												22.281	0.455	1.29019	0.0803857				8.41	1.156	0.486983	0.204233
			37.654	1.565	1.17459	0.102142				15.797	83.473	0.492776	5.44797				91.259	14.827	1.1322	0.761486												13.443	0.319	0.778419	0.0563583				6.57	0.868	0.380437	0.153351
			38.914	2.273	1.21389	0.14835				23.395	167.254	0.72979	10.916				59.105	10.238	0.733285	0.525804												22.517	0.47	1.30385	0.0830358				5.441	0.632	0.315062	0.111657
			23.069	3.29	0.719621	0.214726				24.306	168.147	0.758208	10.9743				121.802	14.977	1.51113	0.76919												4.336	7.952	0.251077	1.40489				10.532	1.003	0.609857	0.177202
			20.679	21.453	0.645066	1.40016				19.081	117.405	0.595218	7.66258				142.12	16.784	1.76321	0.861994												4.363	0.498	0.25264	0.0879826				9.395	1.1	0.544019	0.194339
			34.514	65.673	1.07664	4.28623				52.203	1.674	1.62843	0.109256				94.381	14.416	1.17094	0.740378												2.948	0.473	0.170704	0.0835658				11.142	1.02	0.64518	0.180205
			63.372	1.437	1.97684	0.0937876				28.04	1.749	0.874687	0.114151				57.939	12.496	0.718819	0.641771												4.9	0.392	0.283735	0.0692554				6.211	2.42	0.359649	0.427546
			20.231	85.637	0.631091	5.5892				48.241	1.846	1.50484	0.120481				82.885	15.439	1.02831	0.792917												4.159	0.321	0.240828	0.0567117				6.974	0.874	0.403831	0.154411
			53.27	2.075	1.66172	0.135427				19.78	60.421	0.617023	3.94345				46.641	16.163	0.57865	0.830101												4.869	0.519	0.28194	0.0916927				14.626	1.385	0.846921	0.244691
			55.788	2.197	1.74027	0.14339				13.322	52.244	0.41557	3.40977				35.111	23.486	0.435604	1.2062												4.323	0.344	0.250324	0.0607751				5.661	1.088	0.327801	0.192219
			18.832	53.601	0.587451	3.49833				50.57	1.966	1.57749	0.128313				111.812	14.619	1.38719	0.750804												3.66	0.343	0.211933	0.0605984				4.865	0.862	0.281709	0.152291
			52.383	1.351	1.63405	0.0881747				14.828	36.909	0.462549	2.40891				80.533	13.694	0.999131	0.703298												3.899	0.461	0.225772	0.0814457				4.998	0.975	0.28941	0.172255
			30.166	1.602	0.941006	0.104556				8.432	34.572	0.26303	2.25638				110.698	14.77	1.37337	0.758559												3.987	0.384	0.230868	0.067842				7.949	20.975	0.460288	3.70569
			37.478	1.588	1.1691	0.103643				17.947	61.381	0.559844	4.00611				137.937	15.724	1.71131	0.807554												4.441	0.273	0.257157	0.0482314				5.975	9.003	0.345983	1.59058
			86.095	1.43	2.68567	0.0933307				18.873	92.939	0.58873	6.06578				107.349	15.216	1.33182	0.781465												3.622	2.158	0.209733	0.381258				4.373	9.082	0.253219	1.60453
			14.931	23.18	0.465762	1.51287				16.703	91.595	0.521038	5.97806				34.978	22.127	0.433954	1.1364												3.972	0.338	0.229999	0.0597151				5.633	6.537	0.32618	1.1549
			46.563	1.414	1.4525	0.0922864				19.264	3.207	0.600926	0.209309				91.487	13.811	1.13503	0.709306												5.092	0.48	0.294853	0.0848025				5.464	13.709	0.316394	2.42199
			40.553	1.44	1.26502	0.0939834				17.652	2.935	0.550641	0.191556				82.8	17.313	1.02726	0.889162												5.89	0.346	0.341062	0.0611285				5.594	6.841	0.323922	1.20861
			37.804	1.362	1.17927	0.0888926				17.415	74.253	0.543248	4.84621				99.052	16.104	1.22889	0.82707												4.883	0.581	0.282751	0.102646				4.949	9.273	0.286573	1.63828
			88.733	1.606	2.76796	0.104818				24.934	46.743	0.777798	3.05074				120.834	17.446	1.49912	0.895993												9.984	0.293	0.578125	0.0517649				6.306	10.537	0.36515	1.86159
			35.45	2.728	1.10584	0.178046				14.06	62.969	0.438591	4.10975				76.511	25.255	0.949232	1.29705												4.312	0.377	0.249687	0.0666053				6.25	13.734	0.361907	2.42641
			29.781	1.753	0.928997	0.114412				30.145	84.11	0.940351	5.48954				118.287	16.163	1.46752	0.830101												5.17	0.686	0.29937	0.121197				9.291	28.562	0.537997	5.0461
			37.661	4.559	1.17481	0.297549				16.612	33.682	0.518199	2.1983				150.156	15.23	1.86291	0.782184												4.467	0.325	0.258662	0.0574183				9.451	16.861	0.547262	2.97886
			57.013	1.39	1.77848	0.09072				31.675	92.118	0.988079	6.01219				112.723	16.822	1.3985	0.863946												4.707	0.85	0.27256	0.150171				7.311	14.119	0.423345	2.49443
			33.543	1.775	1.04635	0.115848				24.469	49.402	0.763293	3.22428				81.934	17.069	1.01651	0.876631												3.929	0.359	0.227509	0.0634252				8.771	14.376	0.507886	2.53983
			24.176	15.845	0.754153	1.03414				21.227	36.041	0.662161	2.35226				76.473	11.856	0.94876	0.608901												3.805	0.455	0.220329	0.0803857				7.925	5.714	0.458899	1.0095
			37.334	41.631	1.16461	2.7171				28.092	53.591	0.87631	3.49768				101.366	11.088	1.25759	0.569458												4.776	0.799	0.276555	0.141161				6.165	9.432	0.356985	1.66637
			40.012	42.644	1.24815	2.78321				19.09	78.377	0.595499	5.11537				82.355	9.048	1.02174	0.464688												3.32	0.605	0.192245	0.106886				6.354	12.669	0.36793	2.23826
			22.383	5.671	0.698221	0.370125				29.879	77.708	0.932054	5.07171				68.943	9.783	0.85534	0.502436												5.658	1.435	0.327628	0.253524				3.874	9.378	0.224325	1.65683
			43.046	1.754	1.34279	0.114477				41.12	3.415	1.28271	0.222884				79.309	11.327	0.983945	0.581733												5.535	1.373	0.320505	0.24257				6.808	9.394	0.394218	1.65966
			29.593	2.861	0.923132	0.186727				19.804	66.627	0.617771	4.34849				89.253	12.203	1.10732	0.626723												5.94	0.544	0.343957	0.0961095				9.817	33.482	0.568455	5.91533
			34.502	3.625	1.07626	0.23659				19.195	64.991	0.598774	4.24172				55.164	11.199	0.684391	0.575159												4.129	0.559	0.23909	0.0987596				6.402	16.172	0.370709	2.85714
			51.858	1.459	1.61767	0.0952234				25.063	79.198	0.781822	5.16895				53.019	17.832	0.657779	0.915817												3.833	0.494	0.221951	0.0872759				5.371	8.153	0.311009	1.44041
			37.196	1.851	1.1603	0.120808				29.291	75.721	0.913711	4.94202				95.434	11.61	1.184	0.596267												11.811	0.311	0.683918	0.0549449				7.269	12.873	0.420913	2.2743
			38.115	1.583	1.18897	0.103316				24.549	69.396	0.765788	4.52921				75.256	9.025	0.933662	0.463507												4.614	0.274	0.267175	0.0484081				6.153	12.931	0.356291	2.28454
			42.461	2.07	1.32454	0.135101				23.758	72.332	0.741114	4.72084				59.727	10.793	0.741002	0.554308												7.575	0.224	0.438632	0.0395745				5.002	10.747	0.289642	1.89869
			26.042	16.493	0.812361	1.07644				23.489	115.48	0.732722	7.53694				89.831	9.019	1.11449	0.463199												5.232	1.269	0.30296	0.224197				5.227	11.157	0.30267	1.97113
			13.572	13.438	0.423369	0.877047				20.23	79.492	0.63106	5.18814				100.268	9.444	1.24397	0.485026												7.87	0.18	0.455714	0.0318009				4.825	6.071	0.279393	1.07257
			35.115	27.919	1.09539	1.82217				24.006	77.244	0.74885	5.04142				80.56	10.216	0.999466	0.524674												6.362	0.314	0.368393	0.055475				7.064	11.556	0.409042	2.04162
			41.791	2.206	1.30364	0.143977				20.476	78.883	0.638734	5.14839				72.211	10.194	0.895884	0.523544												7.925	0.34	0.458899	0.0600684				4.692	4.35	0.271691	0.768523
			57.834	1.881	1.80409	0.122766				22.578	77.76	0.704304	5.0751				50.303	9.439	0.624083	0.484769												4.667	0.467	0.270243	0.0825058				6.798	14.05	0.393639	2.48224
			56.067	1.585	1.74897	0.103447				29.983	74.687	0.935298	4.87454				111.992	9.971	1.38943	0.512091												4.198	0.486	0.243086	0.0858625				4.52	12.265	0.261731	2.16688
			72.482	1.525	2.26102	0.099531				28.084	77.885	0.87606	5.08326				63.667	9.612	0.789883	0.493654												5.578	0.457	0.322995	0.080739				4.65	9.254	0.269259	1.63492
			68.524	1.902	2.13756	0.124136				30.6	81.086	0.954545	5.29218				63.166	21.766	0.783667	1.11786												4.202	0.235	0.243318	0.0415179				8.154	24.269	0.472159	4.28765
			69.309	6.617	2.16204	0.431867				15.126	95.026	0.471845	6.20199				95.618	10.49	1.18628	0.538746												7.521	0.48	0.435505	0.0848025				6.19	7.704	0.358433	1.36108
			32.895	2.759	1.02614	0.180069				30.624	85.763	0.955293	5.59743				57.28	11.142	0.710643	0.572232												8.179	0.312	0.473606	0.0551216				6.417	11.887	0.371578	2.1001
			71.99	1.802	2.24568	0.11761				21.003	116.541	0.655173	7.60619				110.512	10.984	1.37106	0.564117												5.185	0.196	0.300238	0.0346277				4.718	4.75	0.273197	0.839191
			35.379	74.602	1.10362	4.86899				38.59	2.136	1.20379	0.139409				91.07	10.008	1.12986	0.513992												2.378	0.672	0.137699	0.118723				5.501	10.413	0.318536	1.83968
			37.487	2.763	1.16938	0.180331				59.293	1.888	1.8496	0.123223				76.795	9.969	0.952755	0.511989												6.464	0.448	0.374299	0.079149				5.374	4.835	0.311182	0.854208
			56.35	2.317	1.7578	0.151222				16.544	19.197	0.516078	1.25292				59.112	9.986	0.733372	0.512862												4.12	11.878	0.238569	2.09851				4.095	7.175	0.237122	1.26762
			55.831	3.728	1.74161	0.243312				17.739	20.857	0.553355	1.36126				85.73	8.722	1.06361	0.447945												2.885	11.197	0.167056	1.97819				6.293	18.241	0.364397	3.22267
			45.155	1.888	1.40858	0.123223				25.972	1.553	0.810178	0.101358				104.527	12.33	1.29681	0.633245												2.817	0.734	0.163119	0.129677				4.422	8.781	0.256057	1.55136
			63.142	4.47	1.96967	0.29174				49.099	2.003	1.53161	0.130728				51.431	10.299	0.638077	0.528937												4.165	0.843	0.241175	0.148934				7.57	20.02	0.438342	3.53697
			62.669	2.242	1.95491	0.146327				69.084	1.897	2.15503	0.12381				86.256	10.385	1.07013	0.533354												5.106	0.386	0.295664	0.0681953				6.667	4.787	0.386054	0.845728
			37.752	39.654	1.17765	2.58807				45.302	2.884	1.41316	0.188228				106.741	10.456	1.32428	0.537												10.454	0.246	0.605341	0.0434613				5.109	1.263	0.295838	0.223137
			60.598	4.226	1.89031	0.275815				52.008	1.754	1.62235	0.114477				65.841	12.009	0.816855	0.616759												4.8	0.353	0.277945	0.0623652				8.731	14.527	0.50557	2.56651
			68.178	1.977	2.12676	0.129031				33.141	2.007	1.03381	0.130989				99.219	11.999	1.23096	0.616246												4.87	0.443	0.281998	0.0782656				5.847	9.329	0.338572	1.64817
			39.355	2.08	1.22765	0.135754				12.97	74.789	0.40459	4.8812				93.676	10.748	1.16219	0.551997												5.771	0.685	0.334171	0.12102				4.949	8.508	0.286573	1.50312
			74.755	2.013	2.33193	0.131381				71.491	1.798	2.23011	0.117349				70.251	22.027	0.871567	1.13126												14.397	0.246	0.833661	0.0434613				7.06	8.482	0.408811	1.49853
			79.267	2.137	2.47268	0.139474				92.939	1.818	2.89916	0.118654				86.664	10.644	1.07519	0.546655												4.686	0.517	0.271344	0.0913393				4.602	0.654	0.26648	0.115543
			33.875	2.039	1.05671	0.133078				33.464	3.552	1.04389	0.231826				59.659	14.399	0.740158	0.739505												7.113	0.258	0.41188	0.0455813				4.435	7.633	0.256809	1.34854
			58.356	2.121	1.82037	0.13843				17.725	67.329	0.552919	4.39431				90.732	10.173	1.12566	0.522466												3.66	0.763	0.211933	0.134801				6.009	9.199	0.347952	1.6252
			48.775	3.116	1.5215	0.20337				14.148	74.13	0.441337	4.83818				82.579	10.429	1.02451	0.535613												4.995	0.503	0.289236	0.0888659				4.987	8.295	0.288773	1.46549
			44.537	36.447	1.3893	2.37876				62.858	1.788	1.96081	0.116696				71.584	10.174	0.888105	0.522517												21.541	0.22	1.24734	0.0388678				8.454	1.296	0.48953	0.228967
			72.347	3.162	2.25681	0.206372				10.706	62.149	0.333966	4.05623				58.473	26.17	0.725444	1.34404												13.666	0.19	0.791332	0.0335677				6.027	12.126	0.348995	2.14232
			41.702	46.854	1.30086	3.05798				37.404	2.151	1.16679	0.140388				88.075	10.816	1.0927	0.555489												12.319	0.282	0.713334	0.0498215				8.861	1.358	0.513098	0.23992
			45.842	34.684	1.43001	2.26369				18.261	74.335	0.569639	4.85156				102.174	11.457	1.26762	0.588409												22.912	0.277	1.32672	0.0489381				5.976	7.482	0.346041	1.32186
			40.498	7.75	1.26331	0.505813				66.712	2.014	2.08103	0.131446				60.509	11.503	0.750703	0.590772												15.342	0.253	0.888381	0.044698				4.139	6.346	0.23967	1.12116
			47.227	9.683	1.47321	0.631973				71.374	2.069	2.22646	0.135036				86.881	11.63	1.07789	0.597294												11.187	0.252	0.647785	0.0445213				4.926	7.446	0.285241	1.3155
			86.157	2.138	2.68761	0.139539				27.975	64.133	0.87266	4.18572				62.934	20.67	0.780789	1.06157												6.93	4.321	0.401283	0.763399				4.85	6.664	0.28084	1.17734
			59.434	39.135	1.854	2.55419				58.712	1.866	1.83148	0.121787				67.455	28.229	0.836879	1.44979												8.656	0.317	0.501227	0.056005				6.9	10.154	0.399546	1.79393
										57.616	1.925	1.79729	0.125637				58.776	16.342	0.729203	0.839294												7.504	0.475	0.43452	0.0839191				5.21	12.162	0.301686	2.14868
										33.796	80.604	1.05424	5.26072				55.472	8.665	0.688212	0.445018												5.634	0.201	0.326238	0.035511				5.295	10.719	0.306608	1.89375
										61.912	1.867	1.9313	0.121852				59.924	14.179	0.743446	0.728206												4.318	0.276	0.250035	0.0487614				8.261	26.206	0.478355	4.62986
										70.869	2.328	2.21071	0.15194				78.322	13.33	0.9717	0.684603												10.953	0.255	0.634235	0.0450513				4.29	4.287	0.248413	0.757392
										5.346	9.463	0.166765	0.617614				96.125	13.321	1.19257	0.684141												5.651	0.802	0.327222	0.141691				4.921	8.819	0.284951	1.55807
										61.935	2.501	1.93202	0.163231				83.963	11.912	1.04168	0.611777												2.815	0.267	0.163003	0.0471714				5.008	6.184	0.289989	1.09254
										62.757	1.825	1.95766	0.119111				33.718	12.437	0.418322	0.63874												6.847	0.268	0.396477	0.0473481				7.186	9.746	0.416107	1.72184
										67.92	1.917	2.11872	0.125115				113.801	11.263	1.41187	0.578446												9.361	1.444	0.54205	0.255114				7.218	6.336	0.41796	1.11939
										79.884	1.913	2.49192	0.124854				50.836	16.588	0.630696	0.851928												7.509	2.646	0.43481	0.467474				6.748	16.878	0.390744	2.98187
										105.21	2.206	3.28195	0.143977				86.338	12.539	1.07115	0.643979												9.645	0.837	0.558495	0.147874				6.753	28.551	0.391034	5.04416
										15.057	37.792	0.469692	2.46654				80.071	13.72	0.993399	0.704633												9.467	3.124	0.548188	0.551923				8.463	8.142	0.490052	1.43846
										39.834	2.718	1.24259	0.177394				82.371	11.607	1.02193	0.596113												9.579	0.886	0.554674	0.156531				13.01	0.59	0.753346	0.104236
										103.628	2.182	3.2326	0.142411				69.101	21.767	0.8573	1.11791												9.88	5.463	0.572103	0.965158				6.461	8.56	0.374125	1.51231
										71.232	1.908	2.22203	0.124528				97.206	14.23	1.20598	0.730825												9.19	27.802	0.532149	4.91183				8.908	9.106	0.515819	1.60877
										67.744	1.601	2.11322	0.104491				104.18	13.349	1.29251	0.685579												10.84	2.057	0.627692	0.363414
										60.297	2.258	1.88092	0.147371				55.755	11.133	0.691723	0.571769												8.538	0.806	0.494394	0.142398
										61.751	2.048	1.92628	0.133665				101.271	13.453	1.25642	0.69092												11.237	1.403	0.650681	0.247871
										43.225	2.084	1.34837	0.136015				62.697	11.254	0.777849	0.577984												9.326	0.417	0.540024	0.0736722
										80.697	2.146	2.51728	0.140061				30.952	14.943	0.384005	0.767444												14.197	3.623	0.82208	0.640082
										32.49	96.31	1.0135	6.28579				83.587	12.379	1.03702	0.635762												9.694	1.715	0.561333	0.302992
										72.619	2.026	2.2653	0.132229				80.949	14.126	1.00429	0.725484												11.133	28.463	0.644658	5.02861
										22.969	74.709	0.716501	4.87597				57.149	17.103	0.709018	0.878377												10.508	0.923	0.608468	0.163068
										23.394	71.205	0.729759	4.64728				90.429	16.27	1.12191	0.835596												10.664	26.987	0.617501	4.76784
										81.388	2.216	2.53884	0.14463				56.969	22.422	0.706785	1.15155												6.969	1.951	0.403541	0.344687
										15.536	62.158	0.484634	4.05682				35.965	14.924	0.446199	0.766468												8.756	0.507	0.507018	0.0895726
										17.307	41.227	0.539879	2.69073				75.25	15.381	0.933587	0.789939												8.785	0.576	0.508697	0.101763
										18.371	61.697	0.57307	4.02673				85.002	16.486	1.05458	0.846689												9.297	18.121	0.538344	3.20147
										20.716	100.834	0.646221	6.58105				76.995	18.053	0.955237	0.927167												20.358	0.98	1.17883	0.173138
										15.578	91.324	0.485944	5.96037				63.251	17.624	0.784722	0.905135												9.245	0.894	0.535333	0.157945
										20.021	3.034	0.624541	0.198018				61.952	12.045	0.768606	0.618608												16.879	6.581	0.977382	1.16268
										143.794	2.774	4.48555	0.181048				74.167	13.67	0.920151	0.702065												19.679	12.539	1.13952	2.21529
										20.915	3.416	0.652428	0.222949				77.086	16.056	0.956366	0.824605												16.199	0.705	0.938006	0.124554
										20.743	84.277	0.647063	5.50044				54.247	17.585	0.673014	0.903132												12.708	0.689	0.735859	0.121727
										24.415	45.524	0.761608	2.97118				65.137	14.734	0.808121	0.75671												12.615	1.318	0.730474	0.232853
										19.21	77.11	0.599242	5.03268				64.549	17.491	0.800826	0.898304												11.475	0.894	0.664462	0.157945
										34.947	94.156	1.09015	6.14521				96.146	13.615	1.19283	0.69924												13.996	1.654	0.810441	0.292215
										19.314	39.955	0.602486	2.60771				68.238	14.219	0.846593	0.730261												12.823	8.022	0.742518	1.41726
										21.409	41.061	0.667838	2.6799				89.39	14.072	1.10901	0.722711												13.181	1.368	0.763248	0.241687
										1.622	1.532	0.0505971	0.0999878				83.754	13.124	1.03909	0.674023												30.989	0.511	1.79442	0.0902793
										26.967	121.788	0.841216	7.94864				34.749	14.187	0.431113	0.728617												11.946	1.537	0.691735	0.271545
																	36.09	11.336	0.44775	0.582195												10.457	0.719	0.605514	0.127027
																	30.063	13.306	0.372976	0.683371												21.698	1.133	1.25643	0.200169
																	44.176	15.823	0.548068	0.812639												12.292	1.848	0.71177	0.32649
																	78.379	14.981	0.972407	0.769395												31.843	0.495	1.84387	0.0874526
																	37.525	14.598	0.465553	0.749725												8.626	0.584	0.49949	0.103176
																	32.127	13.73	0.398583	0.705146												20.769	1.144	1.20263	0.202113
																	71.725	13.908	0.889854	0.714288												11.614	23.039	0.672511	4.07034
																	46.812	12.649	0.580772	0.649628												9.878	1.507	0.571987	0.266244
																	62.648	14.515	0.777241	0.745463												8.64	4.001	0.500301	0.706864
																	58.489	17.651	0.725642	0.906521												8.726	4.707	0.505281	0.831594
																	101.301	14.571	1.25679	0.748339												32.55	0.542	1.88481	0.0957561
																																35.443	0.543	2.05233	0.0959328
																																26.103	0.5	1.5115	0.0883359
																																11.829	0.94	0.68496	0.166072
																																11.394	0.657	0.659772	0.116073
																																10.479	1.878	0.606788	0.33179
																																16.64	0.495	0.963542	0.0874526
																																9.96	42.821	0.576736	7.56527
																																11.014	0.559	0.637768	0.0987596
																																17.829	0.447	1.03239	0.0789723
																																15.104	1.178	0.8746	0.208119
																																20.899	70.332	1.21016	12.4257
																																17.136	1.184	0.992263	0.209179
																																20.596	0.526	1.19262	0.0929294
																																11.895	1.306	0.688782	0.230733
																																8.998	32.042	0.521031	5.66092
																																24.866	1.217	1.43987	0.21501
																																13.203	0.773	0.764522	0.136567
																																7.279	37.249	0.421492	6.58085
																																8.609	35.158	0.498506	6.21143
																																31.606	0.371	1.83015	0.0655453
																																15.016	0.733	0.869504	0.1295
																																13.758	0.584	0.796659	0.103176
																																11.371	4.118	0.65844	0.727535
																																12.58	0.868	0.728447	0.153351
																																34.895	0.375	2.0206	0.0662519
																																34.031	0.338	1.97057	0.0597151
																																10.182	24.865	0.589591	4.39295
																																9.722	1.349	0.562954	0.23833
																																9.011	0.678	0.521784	0.119784
																																12.921	0.489	0.748193	0.0863925
																																11.182	0.606	0.647496	0.107063
																																8.869	12.384	0.513561	2.1879
																																12.725	0.602	0.736843	0.106356
																																10.171	9.585	0.588954	1.6934
																																9.159	6.049	0.530354	1.06869
																																15.878	0.654	0.919418	0.115543
																																8.887	7.763	0.514603	1.3715
																																5.143	20.087	0.297806	3.54881
																																7.806	21.669	0.452008	3.8283
																																8.143	12.084	0.471522	2.1349
																																4.102	2.928	0.237527	0.517295
																																8.174	5.441	0.473317	0.961272
																																5.466	14.407	0.31651	2.54531
																																7.623	5.687	0.441411	1.00473
																																8.301	5.809	0.480671	1.02629
																																2.592	6.426	0.15009	1.13529
																																7.076	8.075	0.409737	1.42663
																																8.819	3.618	0.510666	0.639199
																																6.202	7.547	0.359128	1.33334
																																5.708	10.955	0.330523	1.93544
																																4.473	12.129	0.25901	2.14285
																																6.713	6.294	0.388717	1.11197
																																4.757	5.061	0.275455	0.894136
																																6.138	22.197	0.355422	3.92158
																																15.703	7.711	0.909285	1.36232
																																4.75	5.8	0.27505	1.0247
																																5.324	7.335	0.308287	1.29589
																																7.329	6.028	0.424387	1.06498
																																8.791	1.664	0.509044	0.293982
																																9.364	22.257	0.542224	3.93219
																																6.196	14.302	0.358781	2.52676
																																6.533	19.313	0.378295	3.41206
																																7.926	9.511	0.458956	1.68033
																																5.12	6.143	0.296475	1.0853
																																8.227	11.58	0.476386	2.04586
																																9.121	30.778	0.528153	5.43761
																																8.997	31.448	0.520973	5.55598
																																10.953	11.743	0.634235	2.07466
																																6.653	12.447	0.385243	2.19903
																																7.898	31.566	0.457335	5.57682
																																7.015	16.043	0.406205	2.83435
																																7.663	12.777	0.443727	2.25734
																																47.838	0.646	2.77007	0.11413
																																8.914	50.942	0.516167	9.00002
																																18.971	3.191	1.09852	0.56376
																																8.73	22.727	0.505512	4.01522
																																6.142	9.747	0.355654	1.72202
																																8.688	23.44	0.50308	4.14119
																																6.957	13.472	0.402846	2.38012
																																8.203	31.6	0.474996	5.58283
																																10.963	37.942	0.634815	6.70328
																																5.241	8.065	0.303481	1.42486
																																8.535	20.294	0.494221	3.58538
																																7.066	21.743	0.409158	3.84138
																																37.26	0.389	2.15755	0.0687253
																																7.339	15.447	0.424966	2.72905
																																45.68	0.388	2.64511	0.0685487
																																18.832	0.403	1.09047	0.0711988
																																30.722	0.351	1.77896	0.0620118
																																5.936	22.378	0.343725	3.95356
																																18.593	0.288	1.07663	0.0508815
																																6.659	47.229	0.385591	8.34403

## Sheet: F1F2F, G
Flourescence intensity analysis of SOX2 and GATA6 in H9 Rset treated with ACL for 6 days using Fiji
Units = fluorescence intensity (a.u.)
	Exp 1	Average flourescence intensity (A.U.)	56.246	10.0574	1	1		Exp 1	Average flourescence intensity (A.U.)	12.142	23.2123	0.215872	2.30798			Exp 2	Average flourescence intensity (A.U.)	78.0944	7.83097	1	1		Exp 2	Average flourescence intensity (A.U.)	27.432	38.1544	0.351268	4.87225		Exp 3	Average flourescence intensity (A.U.)	66.6572	6.37877	1	1		Exp 3	Average flourescence intensity (A.U.)	5.53781	37.2723	0.083079	5.84319
	Control	Standard Deviation	36.0625	19.9688	0.641157	1.98548		ACL	Standard Deviation	7.3266	43.5155	0.13026	4.32671			Control	Standard Deviation	38.3129	2.42757	0.490597	0.309996		ACL	Standard Deviation	28.1668	36.7833	0.360676	4.69716		Control	Standard Deviation	47.3397	5.36767	0.710197	0.841491		ACL	Standard Deviation	6.14274	38.8684	0.0921542	6.09341
			SOX2	GATA6	rel SOX2	rel GATA6				SOX2	GATA6	rel SOX2	rel GATA6					SOX2	GATA6	rel SOX2	rel GATA6				SOX2	GATA6	rel SOX2	rel GATA6				SOX2	GATA6	rel SOX2	rel GATA6				SOX2	GATA6	rel SOX2	rel GATA6				SOX2
			28.454	4.945	0.505885	0.491677				14.219	1.301	0.2528	0.129357					158.79	12.158	2.03331	1.55255				79.12	16.049	1.01313	2.04943				35.479	2.352	0.532261	0.368723				0.422	0.393	0.0063309	0.0616107				Number of values	2472	1739
			71.802	4.495	1.27657	0.446934				16.526	1.681	0.293816	0.16714					172.913	12.075	2.21415	1.54195				119.724	11.089	1.53307	1.41604				9.84	1.449	0.147621	0.22716				0.624	3.209	0.00936133	0.503075
			40.765	4.48	0.724762	0.445442				24.19	1.644	0.430075	0.163461					126.54	12.467	1.62035	1.59201				3.601	8.743	0.0461109	1.11646				29.252	3.025	0.438842	0.47423				0.147	0.254	0.00220531	0.0398196				Minimum	0.01152	0.002205
			100.34	3.62	1.78395	0.359933				25.569	1.742	0.454592	0.173205					125.753	10.974	1.61027	1.40136				11.458	81.192	0.14672	10.3681				47.688	4.292	0.715422	0.672857				0.328	0.342	0.0049207	0.0536154				25% Percentile	0.5984	0.07771
			38.234	4.684	0.679764	0.465726				14.214	1.575	0.252711	0.156601					128.402	10.191	1.64419	1.30137				5.08	49.916	0.0650495	6.37418				36.509	5.1	0.547713	0.799528				0.938	0.611	0.014072	0.0957865				Median	0.902	0.1548
			111.896	3.879	1.9894	0.385685				15.233	1.739	0.270828	0.172907					124.782	10.822	1.59784	1.38195				2.864	11.417	0.0366736	1.45793				90.447	4.519	1.3569	0.708444				4.476	0.637	0.0671495	0.0998626				75% Percentile	1.306	0.319
			49.301	4.655	0.876524	0.462842				24.422	1.698	0.4342	0.168831					93.848	12.09	1.20173	1.54387				112.916	11.461	1.44589	1.46355				59.463	4.279	0.892072	0.670819				0.453	1.592	0.00679597	0.249578				Maximum	3.413	1.974
			58.884	4.6	1.0469	0.457374				24.193	1.8	0.430128	0.178972					167.986	14.476	2.15106	1.84856				136.86	10.729	1.75249	1.37007				40.989	3.417	0.614922	0.535683				0.504	2.061	0.00756107	0.323103
			104.446	3.951	1.85695	0.392844				21.887	1.573	0.38913	0.156402					178.66	14.388	2.28774	1.83732				101.226	10.336	1.2962	1.31989				23.464	2.257	0.35201	0.35383				0.623	0.487	0.00934633	0.076347				Mean	1	0.2607
			45.581	4.008	0.810386	0.398512				19.042	1.667	0.338548	0.165748					123.348	10.339	1.57947	1.32027				3.517	44.566	0.0450352	5.69099				45.557	4.733	0.683452	0.741993				0.521	1.582	0.00781611	0.24801				Std. Deviation	0.5793	0.2976
			66.665	3.502	1.18524	0.348201				25.977	1.991	0.461846	0.197963					112.138	10.483	1.43593	1.33866				93.084	10.072	1.19194	1.28618				47.631	4.698	0.714567	0.736506				1.53	20.893	0.0229533	3.2754				Std. Error of Mean	0.01165	0.007137
			59.794	3.843	1.06308	0.382106				25.945	1.702	0.461277	0.169228					145.694	13.061	1.86561	1.66787				107.322	6.278	1.37426	0.801689				52.115	4.424	0.781836	0.693551				0.372	2.947	0.00558079	0.462002
			75.457	4.161	1.34155	0.413724				23.086	1.944	0.410447	0.19329					108.165	9.067	1.38505	1.15784				147.674	11.432	1.89097	1.45984				58.385	4.267	0.8759	0.668938				0.424	0.35	0.0063609	0.0548695				Lower 95% CI of mean	0.9772	0.2467
			49.922	5.316	0.887565	0.528565				12.037	2.004	0.214006	0.199256					199.871	14.42	2.55935	1.84141				43.815	2.991	0.561052	0.381945				45.3	3.795	0.679597	0.594943				0.63	1.764	0.00945134	0.276542				Upper 95% CI of mean	1.023	0.2747
			71.721	3.927	1.27513	0.390458				23.868	1.618	0.42435	0.160876					101.108	12.098	1.29469	1.54489				117.473	10.69	1.50424	1.36509				55.584	4.703	0.833879	0.73729				6.902	1.025	0.103545	0.160689
			66.492	5.155	1.18216	0.512557				21.995	1.921	0.39105	0.191003					89.958	10.755	1.15191	1.37339				86.907	5.785	1.11285	0.738734				91.383	4.249	1.37094	0.666116				0.323	2.123	0.00484569	0.332823				Sum	2472	453.4
			62.572	4.596	1.11247	0.456976				19.794	1.519	0.351918	0.151033					156.907	11.735	2.0092	1.49854				154.181	10.359	1.97429	1.32282				65.553	5.11	0.983435	0.801095				0.403	0.416	0.00604586	0.0652164
			90.745	4.362	1.61336	0.43371				31.601	1.592	0.561835	0.158291					122.58	11.172	1.56964	1.42664				111.033	10.103	1.42178	1.29013				60.466	4.607	0.907119	0.72224				0.521	0.474	0.00781611	0.074309				D'Agostino & Pearson normality test
			62.155	4.902	1.10506	0.487401				26.6	1.992	0.472922	0.198063					178.937	12.681	2.29129	1.61934				123.112	8.612	1.57645	1.09974				69.137	3.863	1.0372	0.605603				0.973	0.592	0.0145971	0.0928079				K2	225.6	878.3
			73.456	4.593	1.30598	0.456678				15.595	1.355	0.277264	0.134726					128.113	11.772	1.64049	1.50326				12.81	71.284	0.164032	9.10283				50.792	4.9	0.761988	0.768174				5.879	0.923	0.0881975	0.144699				P value	<0.0001	<0.0001
			32.165	4.415	0.571863	0.438979				18.352	1.635	0.326281	0.162567					122.189	10.489	1.56463	1.33943				115.301	10.428	1.47643	1.33164				47.707	4.976	0.715707	0.780088				10.318	0.966	0.154792	0.15144				Passed normality test (alpha=0.05)?	No	No
			101.146	3.709	1.79828	0.368782				16.624	1.835	0.295559	0.182452					181.05	10.834	2.31835	1.38348				61.324	6.543	0.785255	0.835529				55.446	4.943	0.831808	0.774915				0.786	4.193	0.0117917	0.657337				P value summary	****	****
			86.56	4.469	1.53895	0.444349				19.979	2.014	0.355207	0.20025					156.456	13.447	2.00342	1.71716				100.357	9.311	1.28507	1.189				64.178	4.113	0.962807	0.644795				5.01	0.768	0.0751607	0.120399
			108.458	4.884	1.92828	0.485612				29.64	1.664	0.526971	0.16545					18.075	4.657	0.231451	0.59469				3.513	1.086	0.044984	0.13868				45.502	4.629	0.682627	0.725689				5.312	1.029	0.0796913	0.161316
			87.226	4.544	1.55079	0.451806				24.652	2.151	0.438289	0.213872					20.109	5.267	0.257496	0.672586				11.562	83.927	0.148052	10.7173				62.039	5.2	0.930717	0.815205				0.827	0.825	0.0124068	0.129335
			82.421	5.732	1.46537	0.569927				24.108	1.952	0.428617	0.194086					23.442	4.872	0.300175	0.622145				32.86	3.304	0.420773	0.421915				57.488	4.926	0.862443	0.77225				7.152	0.722	0.107295	0.113188				Column B	Rset-ACL
			59.096	6.742	1.05067	0.670351				22.013	1.535	0.39137	0.152624					6.044	8.112	0.0773935	1.03589				95.198	9.459	1.21901	1.2079				57.151	5.086	0.857387	0.797333				9.882	0.967	0.148251	0.151597				vs.	vs.
			82.371	4.461	1.46448	0.443553				23.017	1.961	0.40922	0.19498					49.914	5.079	0.63915	0.648579				7.049	47.824	0.0902626	6.10703				70.085	5.691	1.05142	0.892179				6.163	0.978	0.0924581	0.153321				Column A	Rset
			97.651	4.011	1.73614	0.39881				24.432	1.784	0.434377	0.177381					55.441	4.28	0.709923	0.546548				51.998	5.621	0.665835	0.717791				64.779	5.394	0.971823	0.845618				6.601	0.735	0.0990291	0.115226
			107.587	4.01	1.91279	0.398711				24.723	1.691	0.439551	0.168135					41.517	6.617	0.531626	0.844978				124.468	9.108	1.59381	1.16307				72.215	4.845	1.08338	0.759551				0.765	0.547	0.0114766	0.0857533				Mann Whitney test
			109.561	4.664	1.94789	0.463737				20.401	1.889	0.36271	0.187822					64.276	3.72	0.823055	0.475037				2.95	3.106	0.0377748	0.39663				60.473	4.451	0.907224	0.697784				5.003	0.841	0.0750557	0.131844				P value	<0.0001
			104.623	5.103	1.8601	0.507387				29.5	2.003	0.524481	0.199156					18.059	4.786	0.231246	0.611163				8.08	68.726	0.103465	8.77618				73.819	5.228	1.10744	0.819594				2.151	0.839	0.0322696	0.13153				Exact or approximate P value?	Approximate
			115.754	4.623	2.05799	0.459661				19.975	2.031	0.355136	0.20194					40.688	3.794	0.52101	0.484487				10.843	82.963	0.138845	10.5942				72.472	4.141	1.08723	0.649185				8.209	1.062	0.123153	0.16649				P value summary	****
			100.625	4.507	1.78902	0.448127				28.573	1.979	0.508	0.19677					33.982	4.035	0.43514	0.515262				8.466	59.473	0.108407	7.59459				81.703	5.176	1.22572	0.811442				6.165	0.785	0.0924881	0.123065				Significantly different (P < 0.05)?	Yes
			121.6	4.135	2.16193	0.411139				13.93	2.032	0.247662	0.20204					24.434	7.055	0.312878	0.90091				77.532	6.565	0.992798	0.838338				60.073	5.473	0.901223	0.858003				5.966	0.867	0.0895027	0.13592				One- or two-tailed P value?	Two-tailed
			91.416	4.453	1.62529	0.442758				18.946	1.56	0.336842	0.155109					56.507	4.626	0.723573	0.590731				11.979	114.596	0.153391	14.6337				75.129	5.698	1.1271	0.893276				9.726	2.4	0.145911	0.376248				Sum of ranks in column A,B	6899862 , 1968504
			93.039	4.658	1.65414	0.463141				27.664	1.648	0.491839	0.163859					59.674	3.769	0.764127	0.481294				117.749	10.865	1.50778	1.38744				85.782	4.327	1.28691	0.678344				1.617	49.886	0.0242584	7.82063				Mann-Whitney U	455574
			105.674	4.587	1.87878	0.456081				24.212	2.319	0.430466	0.230576					33.046	6.59	0.423155	0.841531				6.719	6.829	0.0860369	0.87205				96.713	5.468	1.4509	0.857219				9.807	0.796	0.147126	0.124789
			101.028	5.125	1.79618	0.509574				29.111	2.094	0.517565	0.208204					60.978	4.154	0.780824	0.530458				88.323	6.841	1.13098	0.873583				77.649	5.994	1.1649	0.93968				7.983	1.015	0.119762	0.159122				Difference between medians
			159.086	5.825	2.8284	0.579174				28.979	2.019	0.515219	0.200747					46.332	4.763	0.593282	0.608226				3.999	1.37	0.0512073	0.174946				71.383	4.674	1.0709	0.732744				5.087	0.746	0.0763158	0.116951				Median of column A	0.902, n=2472
			129.435	4.763	2.30123	0.473581				21.688	1.66	0.385592	0.165052					23.301	5.204	0.29837	0.664541				149.474	9.475	1.91402	1.20994				89.272	5.65	1.33927	0.885751				0.256	0.741	0.00384055	0.116167				Median of column B	0.1548, n=1739
			68.606	4.155	1.21975	0.413128				21.225	1.987	0.37736	0.197566					53.392	4.526	0.683685	0.577962				6.548	8.085	0.0838472	1.03244				86.326	6.796	1.29507	1.06541				5.804	1.021	0.0870724	0.160062				Difference: Actual	-0.7472
			122.125	4.456	2.17126	0.443056				18.228	1.687	0.324076	0.167737					55.123	5.428	0.705851	0.693145				50.178	5.893	0.64253	0.752525				94.688	5.156	1.42052	0.808307				6.451	0.96	0.0967788	0.150499				Difference: Hodges-Lehmann	-0.6842
			84.568	5.298	1.50354	0.526775				10.594	2.063	0.188351	0.205122					30.653	6.154	0.392512	0.785854				82.598	8.265	1.05767	1.05542				109.877	6.016	1.64839	0.943129				9.099	0.865	0.136504	0.135606
			56.234	4.78	0.999786	0.475271				26.74	2.046	0.475411	0.203432					69.167	7.174	0.885685	0.916106				76.622	7.569	0.981146	0.966547				75.679	5.213	1.13535	0.817243				8.514	1.003	0.127728	0.15724
			98.609	4.708	1.75317	0.468112				26.206	2.1	0.465917	0.208801					46.589	5.48	0.596573	0.699786				95.044	7.819	1.21704	0.998472				56.019	4.284	0.840404	0.671603				6.335	1.076	0.0950385	0.168685
			92.822	5.214	1.65029	0.518423				28.167	2.21	0.500782	0.219738					27.225	7.314	0.348617	0.933984				77.587	24.407	0.993503	3.11673				65.155	4.842	0.977464	0.759081				7.912	1.153	0.118697	0.180756
			119.538	4.851	2.12527	0.48233				19.828	3.077	0.352523	0.305943					39.188	4.7	0.501803	0.600181				6.495	13.427	0.0831686	1.7146				54.377	4.873	0.815771	0.763941				0.224	1.339	0.00336048	0.209915
			126.436	5.363	2.24791	0.533238				21.938	2.209	0.390036	0.219639					76.058	5.064	0.973924	0.646663				8.737	97.003	0.111877	12.3871				85.901	4.745	1.2887	0.743874				6.631	0.732	0.0994791	0.114756
			79.895	4.045	1.42046	0.402191				16.236	9.537	0.28866	0.948255					47.436	4.567	0.607419	0.583197				71.063	8.422	0.909963	1.07547				82.031	5.398	1.23064	0.846245				0.324	4.014	0.00486069	0.629275
			87.56	5.953	1.55673	0.591901				23.142	1.882	0.411442	0.187126					67.092	5.189	0.859114	0.662626				8.153	61.654	0.104399	7.8731				100.689	5.586	1.51055	0.875718				0.723	24.6	0.0108465	3.85654
			69.936	5.173	1.24339	0.514347				28.933	2.159	0.514401	0.214667					78.562	6.633	1.00599	0.847022				98.364	8.883	1.25955	1.13434				99.974	5.215	1.49982	0.817556				0.492	14.254	0.00738105	2.2346
			154.004	4.935	2.73804	0.490682				20.796	2.125	0.369733	0.211287					31.274	7.916	0.400464	1.01086				53.251	6.395	0.68188	0.816629				59.148	4.067	0.887346	0.637584				0.758	33.114	0.0113716	5.19129
			81.03	4.926	1.44064	0.489788				21.105	2.068	0.375226	0.205619					54.08	4.974	0.692495	0.63517				4.095	4.076	0.0524365	0.520498				98.722	5.714	1.48104	0.895784				0.982	2.142	0.0147321	0.335802
			87.332	5.289	1.55268	0.52588				17.767	2.057	0.31588	0.204526					59.946	5.888	0.767609	0.751886				15.593	3.575	0.199669	0.456521				63.271	5.3	0.9492	0.830882				0.266	1.209	0.00399057	0.189535
			88.618	5.554	1.57554	0.552229				23.884	2.063	0.424634	0.205122					39.424	8.817	0.504825	1.12591				15.305	3.005	0.195981	0.383733				68.659	4.579	1.03003	0.71785				0.466	2.57	0.00699099	0.402899
			132.457	4.722	2.35496	0.469504				24.255	1.95	0.43123	0.193887					26.391	7.77	0.337937	0.992214				17.298	2.614	0.221501	0.333803				68.546	5.823	1.02834	0.912872				0.563	1.672	0.0084462	0.26212
			73.798	5.28	1.31206	0.524985				21.565	2.073	0.383405	0.206116					35.085	8.683	0.449264	1.1088				4.45	33.047	0.0569823	4.22004				42.732	4.371	0.641071	0.685242				0.832	38.132	0.0124818	5.97796
			74.761	5.184	1.32918	0.51544				9.656	1.344	0.171674	0.133633					38.425	7.244	0.492033	0.925045				15.019	71.601	0.192319	9.14331				56.926	5.252	0.854011	0.823357				0.327	2.908	0.0049057	0.455887
			101.755	5.307	1.80911	0.52767				24.007	1.953	0.426821	0.194185					61.574	5.044	0.788456	0.644109				12.22	81.792	0.156477	10.4447				73.702	5.126	1.10569	0.803604				0.258	1.143	0.00387055	0.179188
			171.827	5.773	3.05492	0.574004				9.938	1.508	0.176688	0.149939					47.614	4.781	0.609698	0.610525				11.294	4.871	0.14462	0.622018				65.841	4.853	0.987755	0.760805				0.187	0.97	0.0028054	0.152067
			150.916	5.61	2.68314	0.557797				28.423	2.292	0.505333	0.227891					48.354	4.856	0.619174	0.620102				49.998	5.23	0.640225	0.667861				73.6	6.155	1.10416	0.96492				0.353	1.814	0.00529575	0.284381
			79.386	5.509	1.41141	0.547755				22.101	2.229	0.392934	0.221627					87.048	5.882	1.11465	0.75112				13.046	96.913	0.167054	12.3756				11.261	26.247	0.168939	4.11475				0.533	1.727	0.00799614	0.270742
			161.895	6.084	2.87834	0.604926				23.875	2.152	0.424474	0.213971					47.609	5.762	0.609634	0.735797				10.199	107.219	0.130598	13.6917				60.156	6.221	0.902468	0.975267				0.16	0.744	0.00240034	0.116637
			168.835	5.301	3.00172	0.527074				23.511	2.297	0.418003	0.228389					87.422	5.643	1.11944	0.7206				10.491	8.638	0.134337	1.10306				150.879	9.51	2.26351	1.49088				0.317	1.425	0.00475568	0.223397
			106.141	4.755	1.88708	0.472785				13.744	1.697	0.244355	0.168731					84.831	7.463	1.08626	0.953011				6.836	16.23	0.0875351	2.07254				119.267	7.836	1.78926	1.22845				0.989	105.158	0.0148371	16.4856
			90.914	5.481	1.61636	0.544971				10.865	1.786	0.193169	0.17758					29.518	8.309	0.377978	1.06104				51.272	8.584	0.656539	1.09616				141.916	7.78	2.12904	1.21967				0.74	2.244	0.0111016	0.351792
			64.064	5.955	1.139	0.5921				4.477	26.579	0.0795967	2.64273					60.73	5.378	0.777649	0.68676				11.614	75.092	0.148717	9.58911				118.355	8.818	1.77558	1.3824				0.358	4.641	0.00537076	0.72757
			107.162	5.076	1.90524	0.504702				20.379	2.169	0.362319	0.215662					41.357	9.487	0.529577	1.21147				14.352	115.275	0.183778	14.7204				122.854	7.886	1.84307	1.23629				0.19	1.146	0.00285041	0.179659
			167.574	4.795	2.9793	0.476762				19.418	1.869	0.345233	0.185833					57.841	7.286	0.740655	0.930408				52.714	5.52	0.675004	0.704894				91.345	9.942	1.37037	1.55861				0.21	1.302	0.00315045	0.204115
			78.003	6.365	1.38682	0.632866				20.544	1.708	0.365252	0.169825					47.152	5.268	0.603782	0.672714				25.643	30.048	0.328359	3.83707				105.85	16.913	1.58798	2.65145				0.29	1.826	0.00435062	0.286262
			69.609	7.053	1.23758	0.701273				7.221	43.157	0.128382	4.29106					42.97	8.794	0.550232	1.12298				17.36	67.727	0.222295	8.64861				112.783	9.105	1.69199	1.42739				0.296	1.501	0.00444063	0.235312
			79.713	5.036	1.41722	0.500725				20.85	2.28	0.370693	0.226698					68.307	6.12	0.874672	0.781512				13.279	68.803	0.170038	8.78601				113.66	8.13	1.70514	1.27454				1.109	122.868	0.0166374	19.262
			89.703	5.225	1.59483	0.519517				25.939	2.296	0.46117	0.228289					41.214	5.134	0.527746	0.655602				12.011	74.852	0.153801	9.55846				126.354	8.491	1.89558	1.33114				0.266	1.74	0.00399057	0.27278
			61.114	5.641	1.08655	0.560879				14.85	2.184	0.264019	0.217153					29.078	8.289	0.372344	1.05849				10.052	2.01	0.128716	0.256673				96.123	8.163	1.44205	1.27971				0.189	2.347	0.0028354	0.367939
			168.423	5.933	2.9944	0.589913				6.81	41.826	0.121075	4.15872					76.368	6.567	0.977893	0.838594				12.708	69.494	0.162726	8.87425				112.657	8.354	1.6901	1.30966				0.286	1.957	0.00429061	0.306799
			23.67	50.193	0.42083	4.99064				7.208	2.386	0.128151	0.237238					66.557	4.821	0.852263	0.615633				10.778	4.299	0.138012	0.548974				100.341	9.293	1.50533	1.45686				0.398	1.978	0.00597085	0.310091
			142.118	5.314	2.52672	0.528366				5.516	3.033	0.0980691	0.301568					22.871	8.9	0.292864	1.13651				11.898	48.718	0.152354	6.2212				105.05	7.079	1.57597	1.10978				0.273	1.32	0.00409558	0.206937
			139.227	5.101	2.47532	0.507188				5.646	2.324	0.10038	0.231073					26.586	6.636	0.340434	0.847405				20.828	94.232	0.266703	12.0332				122.925	8.122	1.84414	1.27329				0.565	1.89	0.0084762	0.296296
			152.573	4.993	2.7126	0.496449				4.469	1.704	0.0794545	0.169427					14.9	4.246	0.190795	0.542206				120.752	8.018	1.54623	1.02388				123.208	7.434	1.84838	1.16543				0.306	2.717	0.00459065	0.425944
			147.25	5.612	2.61796	0.557996				4.722	1.968	0.0839526	0.195676					116.134	6.115	1.4871	0.780874				38.917	5.3	0.498333	0.6768				120.474	10.03	1.80737	1.5724				0.269	1.02	0.00403557	0.159906
			150.896	4.971	2.68278	0.494262				5.334	2.257	0.0948334	0.224411					57.719	6.285	0.739093	0.802583				90.558	9.04	1.1596	1.15439				131.067	9.052	1.96628	1.41908				0.271	1.323	0.00406558	0.207407
			138.517	4.199	2.4627	0.417503				3.229	2.007	0.0574085	0.199554					16.976	5.44	0.217378	0.694678				97.546	8.356	1.24908	1.06705				14.466	47.56	0.217021	7.45599				0.344	1.306	0.00516073	0.204742
			98.955	5.405	1.75932	0.537414				8.012	1.89	0.142446	0.187921					27.387	7.54	0.350691	0.962844				73.258	6.477	0.93807	0.827101				11.198	38.097	0.167994	5.97247				0.367	1.591	0.00550578	0.249421
			140.649	4.901	2.5006	0.487302				6.613	1.966	0.117573	0.195478					26.112	7.567	0.334365	0.966292				3.947	1.002	0.0505414	0.127954				10.664	32.098	0.159983	5.03201				0.294	1.365	0.00441063	0.213991
			121.844	5.805	2.16627	0.577186				7.202	2.007	0.128045	0.199554					49.411	9.283	0.632709	1.18542				11.491	72.778	0.147142	9.29361				118.853	5.951	1.78305	0.932939				0.306	2.543	0.00459065	0.398666
			139.324	4.825	2.47705	0.479745				1.869	65.038	0.033229	6.46667					102.454	7.889	1.31193	1.00741				4.486	3.551	0.0574433	0.453456				18.546	52.475	0.27823	8.22651				0.298	1.488	0.00447064	0.233274
			151.132	4.992	2.68698	0.49635				5.723	2.021	0.101749	0.200946					25.51	8.415	0.326656	1.07458				4.698	39.73	0.060158	5.07345				106.913	6.454	1.60392	1.01179				0.38	2	0.00570081	0.31354
			70.77	5.505	1.25822	0.547357				6.21	1.852	0.110408	0.184143					120.247	8.755	1.53976	1.118				42.833	4.362	0.548477	0.557019				111.836	6.443	1.67778	1.01007				0.184	1.139	0.00276039	0.178561
			112.881	4.799	2.00692	0.47716				2.553	59.211	0.0453899	5.88729					144.858	9.582	1.85491	1.2236				6.938	57.25	0.0888412	7.31072				90.27	6.091	1.35424	0.954887				0.482	1.908	0.00723103	0.299117
			54.397	4.755	0.967126	0.472785				8.325	2.183	0.14801	0.217054					66.249	11.015	0.84832	1.40659				3.475	0.854	0.0444974	0.109054				103.837	6.837	1.55778	1.07184				0.369	1.671	0.00553579	0.261963
			122.035	4.659	2.16966	0.46324				6.946	2.274	0.123493	0.226102					15.938	5.102	0.204086	0.651516				10.166	63.666	0.130176	8.13003				81.747	5.5	1.22638	0.862236				1.733	1.967	0.0259987	0.308367
			155.082	4.901	2.75721	0.487302				1.609	116.93	0.0286065	11.6262					42.752	9.695	0.54744	1.23803				10.877	87.836	0.13928	11.2165				142.53	8.328	2.13825	1.30558				1.362	1.804	0.0204329	0.282813
			132.634	4.804	2.3581	0.477657				1.083	34.906	0.0192547	3.47067					53.471	9.371	0.684697	1.19666				15.328	1.574	0.196275	0.200997				84.714	6.245	1.27089	0.979029				0.306	12.742	0.00459065	1.99756
			122.84	4.911	2.18398	0.488296				6.821	2.319	0.121271	0.230576					176.172	8.646	2.25589	1.10408				2.879	1.236	0.0368656	0.157835				79.617	6.795	1.19442	1.06525				0.332	1.237	0.00498071	0.193925
			149.471	5.254	2.65745	0.5224				1.203	50.794	0.0213882	5.0504					69.566	11.279	0.890794	1.44031				5.171	18.465	0.0662147	2.35795				123.035	6.722	1.84579	1.05381				0.241	2.821	0.00361551	0.442248
			172.128	4.944	3.06027	0.491577				8.241	2.073	0.146517	0.206116					29.662	7.026	0.379822	0.897207				21.045	2.346	0.269482	0.29958				108.59	7.826	1.62908	1.22688				0.257	1.17	0.00385555	0.183421
			121.305	4.9	2.15669	0.487202				1.957	66.035	0.0347936	6.5658					39.561	9.596	0.506579	1.22539				11.767	80.339	0.150677	10.2591				101.735	8.753	1.52624	1.37221				0.274	1.165	0.00411058	0.182637
			133.257	4.43	2.36918	0.440471				1.794	116.874	0.0318956	11.6207					113.48	12.003	1.45311	1.53276				11.545	82.852	0.147834	10.58				94.036	6.311	1.41074	0.989376				4.835	81.018	0.0725353	12.7012
			112.953	4.512	2.0082	0.448624				6.274	1.685	0.111546	0.167538					111.892	11.198	1.43278	1.42996				74.418	5.489	0.952924	0.700935				90.18	5.974	1.35289	0.936545				3.413	43.588	0.0512023	6.8333
			116.192	5.3	2.06578	0.526974				1.309	56.343	0.0232728	5.60213					96.497	12.184	1.23565	1.55587				16.314	58.895	0.208901	7.52078				133.035	8.458	1.99581	1.32596				5.308	39.492	0.0796313	6.19117
			35.495	2.69	0.631067	0.267464				1.348	89.123	0.0239661	8.86142					75.181	10.85	0.962694	1.38552				88.594	6.957	1.13445	0.888396				112.793	6.956	1.69214	1.09049				1.794	14.738	0.0269138	2.31048
			160.748	4.806	2.85794	0.477856				1.647	103.539	0.0292821	10.2948					30.379	4.612	0.389004	0.588944				9.394	78.631	0.12029	10.041				97.46	8.606	1.46211	1.34916				5.071	66.593	0.0760758	10.4398
			113.727	4.832	2.02196	0.480441				1.809	82.466	0.0321623	8.19952					25.936	17.141	0.332111	2.18887				3.272	2.042	0.041898	0.26076				121.826	7.496	1.82765	1.17515				7.241	1.53	0.10863	0.239858
			143.712	5.188	2.55506	0.515838				1.971	50.643	0.0350425	5.03539					41.651	6.153	0.533342	0.785726				53.343	5.547	0.683058	0.708341				149.55	7.802	2.24357	1.22312				1.442	6.882	0.0216331	1.07889
			148.649	5.178	2.64284	0.514844				1.471	47.741	0.026153	4.74684					38.736	5.928	0.496015	0.756994				3.396	2.692	0.0434858	0.343763				59.351	4.311	0.890392	0.675836				7.595	116.081	0.113941	18.198
			163.248	5.125	2.90239	0.509574				1.424	71.226	0.0253173	7.08194					50.619	4.142	0.648177	0.528926				59.2	4.866	0.758057	0.621379				25.929	13.359	0.38899	2.09429				2.685	2.642	0.0402807	0.414187
			90.478	3.935	1.60861	0.391253				3.669	54.605	0.0652313	5.42932					41.345	6.417	0.529423	0.819439				9.438	38.332	0.120854	4.89492				227.515	13.596	3.41321	2.13145				1.546	7.657	0.0231933	1.20039
			128.168	5.483	2.2787	0.54517				1.353	59.348	0.024055	5.90092					59.56	8.125	0.762667	1.03755				11.402	64.07	0.146003	8.18162				183.9	12.372	2.75889	1.93956				26.591	0.987	0.398922	0.154732
			109.802	4.879	1.95217	0.485114				2.069	65.879	0.0367848	6.55029					45.301	4.727	0.58008	0.603629				7.596	67.965	0.0972669	8.679				111.867	9.238	1.67824	1.44824				6.315	81.115	0.0947385	12.7164
			128.811	5.078	2.29014	0.504901				1.307	42.886	0.0232372	4.26412					63.055	8.255	0.80742	1.05415				4.279	39.293	0.0547927	5.01764				87.395	9.667	1.31111	1.5155				3.104	5.972	0.0465666	0.936231
			67.635	4.238	1.20248	0.42138				1.494	67.613	0.0265619	6.7227					68.58	8.108	0.878168	1.03538				6.67	54.182	0.0854095	6.91894				162.24	10.96	2.43395	1.7182				17.206	1.431	0.258127	0.224338
			124.762	4.252	2.21815	0.422772				2.2	45.585	0.0391139	4.53247					76.162	7.998	0.975256	1.02133				8.515	79.576	0.109035	10.1617				180.951	11.844	2.71465	1.85679				2.617	1.682	0.0392606	0.263687
			155.639	5.642	2.76711	0.560979				1.862	65.582	0.0331046	6.52076					49.452	7.639	0.633234	0.975486				53.166	5.326	0.680791	0.68012				78.858	9.703	1.18304	1.52114				0.385	2.789	0.00577582	0.437232
			140.195	4.834	2.49253	0.48064				2.426	70.926	0.0431319	7.05211					33.998	4.992	0.435345	0.637469				10.665	63.15	0.136565	8.06414				97.443	9.759	1.46185	1.52992				2.506	1.393	0.0375953	0.218381
			146.812	4.346	2.61018	0.432119				1.636	48.905	0.0290865	4.86258					31.191	4.954	0.399401	0.632616				66.185	5.029	0.8475	0.642194				71.39	11.639	1.071	1.82465				20.77	1.125	0.311594	0.176366
			68.668	4.87	1.22085	0.48422				3.38	29.413	0.0600931	2.92451					42.655	5.647	0.546198	0.721111				9.154	3.203	0.117217	0.409017				54.626	7.219	0.819506	1.13172				5.086	103.202	0.0763008	16.179
			101.041	5.719	1.79641	0.568635				1.937	79.618	0.034438	7.91634					64.076	8.523	0.820494	1.08837				8.567	72.194	0.109701	9.21904				117.882	9.573	1.76848	1.50076				8.348	103.361	0.125238	16.2039
			19.148	34.152	0.340433	3.3957				1.327	50.207	0.0235928	4.99204					64.235	8.032	0.82253	1.02567				8.99	70.569	0.115117	9.01153				146.589	8.038	2.19915	1.26012				18.252	1.146	0.273819	0.179659
			77.452	5.129	1.37702	0.509972				1.594	53.397	0.0283398	5.30921					46.462	7.172	0.594947	0.915851				8.129	64.068	0.104092	8.18136				106.124	9.242	1.59209	1.44887				8.744	75.938	0.131179	11.9048
			137.62	4.953	2.44675	0.492472				3.085	48.765	0.0548483	4.84866					71.76	7.937	0.918888	1.01354				7.437	74.905	0.0952309	9.56523				143.53	8.327	2.15326	1.30542				8.949	154.732	0.134254	24.2574
			150.035	5.067	2.66748	0.503807				1.537	79.554	0.0273264	7.90998					28.304	3.466	0.362433	0.442602				5.25	46.354	0.0672263	5.91932				133.23	9.46	1.99873	1.48305				5.342	68.683	0.0801414	10.7674
			151.051	6.737	2.68554	0.669854				1.375	89.032	0.0244462	8.85237					57.212	7.965	0.732601	1.01712				33.835	3.642	0.433258	0.465077				115.133	10.935	1.72724	1.71428				5.281	90.986	0.0792263	14.2639
			123.682	6.518	2.19895	0.648079				1.779	69.112	0.0316289	6.87174					61.739	10.019	0.790569	1.27941				8.88	85.548	0.113709	10.9243				150.605	11.34	2.2594	1.77777				2.194	30.288	0.0329147	4.74825
			61.069	4.383	1.08575	0.435798				2.153	76.316	0.0382783	7.58803					71.011	7.021	0.909297	0.896568				10.684	69.541	0.136809	8.88025				125.987	9.864	1.89007	1.54638				6.506	92.814	0.0976039	14.5505
			47.43	4.147	0.84326	0.412332				2.043	113.339	0.0363226	11.2692					55.475	6.871	0.710358	0.877414				9.273	83.849	0.118741	10.7074				118.637	10.104	1.77981	1.58401				3.22	43.927	0.0483069	6.88644
			24.753	33.012	0.440084	3.28235				3.871	91.176	0.0688226	9.06554					45.497	7.528	0.58259	0.961311				9.946	98.727	0.127359	12.6073				142.036	10.338	2.13084	1.62069				7.102	62.932	0.106545	9.86586
			80.564	6.252	1.43235	0.621631				1.765	98.451	0.03138	9.78889					45.766	6.199	0.586034	0.791601				9.45	93.486	0.121007	11.938				142.404	11.643	2.13636	1.82527				0.777	5.633	0.0116567	0.883086
			162.465	6.239	2.88847	0.620338				1.413	38.838	0.0251218	3.86163					46.652	6.688	0.59738	0.854045				6.363	45.526	0.0814783	5.81358				118.86	8.419	1.78315	1.31985				8.038	68.679	0.120587	10.7668
			105.627	4.639	1.87795	0.461251				1.904	117.536	0.0338513	11.6865					51.102	4.133	0.654362	0.527776				2.221	5.46	0.0284399	0.697232				124.343	8.924	1.86541	1.39902				7.713	124.76	0.115711	19.5586
			89.975	4.762	1.59967	0.473481				1.256	65.757	0.0223305	6.53816					86.264	8.577	1.10461	1.09527				5.295	40.728	0.0678026	5.20089				126.33	10.457	1.89522	1.63935				6.799	69.675	0.101999	10.923
			101.993	4.091	1.81334	0.406764				1.891	140.47	0.0336202	13.9668					60.167	6.182	0.770439	0.78943				10.365	69.555	0.132724	8.88204				109.176	8.761	1.63787	1.37346				6.937	78.328	0.10407	12.2795
			158.529	5.901	2.81849	0.586731				1.059	31.892	0.018828	3.17099					65.262	7.696	0.835681	0.982765				9.541	64.992	0.122173	8.29936				107.113	10.075	1.60692	1.57946				5.3	84.567	0.0795113	13.2576
			150.16	5.765	2.6697	0.573209				3.647	107.376	0.0648401	10.6763					62.069	5.396	0.794795	0.689059				87.531	6.11	1.12084	0.780235				131.581	9.255	1.974	1.45091				0.729	4.5	0.0109366	0.705466
			114.548	5.202	2.03655	0.51723				21.016	5.002	0.373644	0.497344					39.275	5.841	0.502917	0.745885				9.117	81.396	0.116743	10.3941				150.689	11.546	2.26066	1.81007				8.786	3.59	0.131809	0.562805
			103.117	5.257	1.83332	0.522699				16.702	5.127	0.296945	0.509773					5.386	5.346	0.0689678	0.682674				7.856	54.635	0.100596	6.97679				122.459	11.802	1.83715	1.8502				7.741	40.985	0.116132	6.42522
			76.717	4.498	1.36395	0.447232				17.59	5.265	0.312733	0.523494					45.881	5.77	0.587507	0.736818				7.432	54.298	0.0951669	6.93375				134.839	10.555	2.02287	1.65471				5.188	81.515	0.0778311	12.7791
			48.084	5.474	0.854887	0.544275				14.954	5.669	0.265868	0.563663					42.571	8.623	0.545122	1.10114				8.29	29.926	0.106154	3.82149				147.979	9.796	2.22	1.53572				1.391	15.603	0.020868	2.44608
			119.163	5.767	2.1186	0.573407				14.779	5.765	0.262756	0.573209					44.174	6.304	0.565649	0.805009				4.926	15.314	0.0630775	1.95557				118.988	8.79	1.78507	1.37801				5.998	75.335	0.0899828	11.8103
			37.593	5.667	0.668367	0.563465				12.076	3.909	0.2147	0.388668					50.396	9.702	0.645322	1.23893				7.46	45.588	0.0955254	5.8215				127.077	9.777	1.90643	1.53274				6.996	102.233	0.104955	16.0271
			43.249	3.085	0.768925	0.306739				16.433	4.161	0.292163	0.413724					47.251	6.245	0.60505	0.797475				12.155	88.708	0.155645	11.3278				149.516	10.985	2.24306	1.72212				3.861	29.014	0.0579232	4.54853
			64.017	3.246	1.13816	0.322747				12.512	4.803	0.222451	0.477558					5.878	1.749	0.0752679	0.223344				10.786	50.252	0.138115	6.41709				146.378	10.963	2.19598	1.71867				26.358	1.601	0.395426	0.250989
			56.779	2.647	1.00948	0.263189				15.451	5.284	0.274704	0.525383					35.877	4.688	0.459406	0.598649				11.894	102.497	0.152303	13.0887				143.407	10.072	2.15141	1.57899				5.884	91.582	0.0882725	14.3573
			53.866	3.453	0.957685	0.343329				22.12	5.13	0.393272	0.510071					33.401	5.262	0.4277	0.671947				9.889	59.826	0.126629	7.63967				143.756	9.859	2.15665	1.5456				4.2	87.803	0.063009	13.7649
			78.899	3.387	1.40275	0.336766				17.983	4.834	0.31972	0.48064					54.723	8.485	0.700729	1.08352				13.797	83.461	0.176671	10.6578				154.684	10.002	2.32059	1.56801				16.243	1.749	0.24368	0.274191
			58.258	3.034	1.03577	0.301668				13.94	4.587	0.24784	0.456081					29.84	6.122	0.382102	0.781768				12.237	51.137	0.156695	6.5301				83.337	9.796	1.25023	1.53572				1.061	14.325	0.0159173	2.24573
			56.262	2.965	1.00028	0.294807				14.448	5.584	0.256871	0.555212					56.724	8.508	0.726352	1.08646				12.171	64.595	0.15585	8.24866				146.342	10.373	2.19544	1.62618				6.785	122.483	0.101789	19.2017
			52.954	2.994	0.941471	0.297691				14.836	4.596	0.26377	0.456976					56.045	8.123	0.717657	1.03729				16.781	71.445	0.214881	9.12339				156.117	8.978	2.34209	1.40748				32.751	1.924	0.491335	0.301626
			15.036	5.072	0.267326	0.504304				15.187	5.751	0.27001	0.571817					46.723	6.216	0.598289	0.793771				17.885	60.68	0.229018	7.74872				164.087	11.141	2.46165	1.74658				5.451	82.051	0.0817766	12.8631
			64.127	3.379	1.14012	0.335971				20.625	5.881	0.366693	0.584742					49.835	6.199	0.638138	0.791601				90.45	8.313	1.15821	1.06155				160.733	7.846	2.41134	1.23002				9.443	130.673	0.141665	20.4856
			63.328	3.436	1.12591	0.341638				13.675	4.288	0.243128	0.426352					43.971	7.625	0.563049	0.973698				100.315	9.625	1.28454	1.22909				131.985	9.409	1.98006	1.47505				7	46.862	0.105015	7.34656
			47.86	3.084	0.850905	0.306639				11.422	3.964	0.203072	0.394137					31.789	6.943	0.407059	0.886608				69.843	10.111	0.894341	1.29116				133.782	9.218	2.00702	1.44511				38.124	1.597	0.571941	0.250362
			42.649	1.94	0.758258	0.192892				16.653	4.472	0.296074	0.444647					31.883	6.032	0.408262	0.770275				13.682	75.034	0.175198	9.5817				60.017	8	0.900383	1.25416				4.212	76.705	0.063189	12.0251
			20.823	4.969	0.370213	0.494063				17.188	5.572	0.305586	0.554019					68.142	8.372	0.872559	1.06909				102.739	9.601	1.31557	1.22603				46.517	5.616	0.697854	0.880421				9.105	1.462	0.136594	0.229198
			24.965	6.061	0.443854	0.60264				15.545	4.751	0.276375	0.472388					35.321	5.128	0.452286	0.654836				3.285	1.688	0.0420645	0.215554				157.737	10.598	2.36639	1.66145				27.619	1.246	0.414344	0.195336
			66.007	3.341	1.17354	0.332193				19.963	5.19	0.354923	0.516037					44.716	6.603	0.572589	0.843191				6.984	47.372	0.0894302	6.04932				137.157	10.53	2.05765	1.65079				15.119	0.987	0.226817	0.154732
			51.181	3.64	0.909949	0.361922				22.443	5.102	0.399015	0.507287					39.588	7.559	0.506925	0.96527				6.168	53.088	0.0789813	6.77924				108.216	10.897	1.62347	1.70832				2.412	36.257	0.0361851	5.68401
			30.997	3.135	0.551097	0.31171				18.42	4.77	0.32749	0.474277					32.06	5.8	0.410529	0.740649				6.89	55.016	0.0882266	7.02544				98.783	9.678	1.48196	1.51722				7.379	86.748	0.110701	13.5995
			44.194	2.771	0.785727	0.275518				14.022	5.491	0.249298	0.545965					45.988	7.379	0.588877	0.942284				16.742	57.326	0.214382	7.32042				123.587	11.216	1.85407	1.75833				5.509	67.063	0.0826467	10.5135
			43.949	2.501	0.781371	0.248672				13.582	4.326	0.241475	0.43013					37.724	8.291	0.483056	1.05875				19.036	92.288	0.243756	11.785				77.136	10.403	1.1572	1.63088				7.578	62.012	0.113686	9.72163
			38.54	3.629	0.685204	0.360828				13.494	5.152	0.23991	0.512259					54.209	5.87	0.694147	0.749588				16.989	88.517	0.217544	11.3035				132.864	8.436	1.99324	1.32251				3.17	50.201	0.0475568	7.87002
			37.259	4.468	0.662429	0.444249				12.918	4.623	0.22967	0.459661					65.775	11.322	0.84225	1.4458				4.006	6.497	0.0512969	0.829655				123.16	10.327	1.84766	1.61896				7.185	91.997	0.10779	14.4224
			79.93	4.24	1.42108	0.421579				14.497	5.348	0.257743	0.531747					50.322	3.72	0.644374	0.475037				3.254	6.049	0.0416675	0.772446				168.589	10.741	2.52919	1.68387				17.26	1.508	0.258937	0.236409
			43.51	3.04	0.773566	0.302264				12.1	4.274	0.215126	0.42496					61.125	8.482	0.782707	1.08314				11.395	105.042	0.145913	13.4137				129.476	10.524	1.94242	1.64985				6.869	88.985	0.10305	13.9502
			34.908	3.791	0.62063	0.376936				16.471	4.745	0.292838	0.471791					67.782	8.404	0.86795	1.07317				9.083	1.742	0.116308	0.22245				128.843	8.152	1.93292	1.27799				7.437	101.958	0.111571	15.984
			59.813	3.641	1.06342	0.362021				15.282	4.182	0.271699	0.415812					44.24	7.105	0.566494	0.907295				134.928	8.71	1.72776	1.11225				111.958	11.201	1.67961	1.75598				17.94	1.831	0.269138	0.287046
			42.383	3.385	0.753529	0.336567				23.261	5.757	0.413558	0.572413					44.271	6.595	0.566891	0.842169				10.51	123.877	0.134581	15.8189				134.613	12.756	2.01948	1.99976				6.197	30.595	0.0929682	4.79638
			25.32	3.68	0.450165	0.365899				12.292	4.503	0.21854	0.447729					30.112	6.394	0.385585	0.816502				10.517	54.322	0.13467	6.93682				147.238	11.861	2.20888	1.85945				8.735	97.651	0.131044	15.3088
			32.583	3.918	0.579294	0.389563				14.125	5.464	0.251129	0.54328					37.432	6.399	0.479317	0.81714				14.956	168.935	0.191512	21.5727				145.377	12.432	2.18097	1.94897				6.691	23.616	0.100379	3.70228
			29.943	3.563	0.532358	0.354266				6.858	4.454	0.121929	0.442857					30.238	5.537	0.387198	0.707064				14.776	137.29	0.189207	17.5317				69.327	9.141	1.04005	1.43304				7.267	115.004	0.10902	18.0292
			39.253	2.76	0.69788	0.274424				10.976	4.451	0.195143	0.442559					65.505	8.288	0.838793	1.05836				133.542	8.497	1.71001	1.08505				163.49	11.565	2.4527	1.81305				8.599	116.293	0.129003	18.2313
			60.546	4.275	1.07645	0.425059				12.641	4.722	0.224745	0.469504					76.957	9.375	0.985436	1.19717				19.296	138.506	0.247086	17.687				153.582	10.665	2.30406	1.67195				5.686	58.123	0.0853021	9.11195
			66.143	3.363	1.17596	0.33438				15.171	5.464	0.269726	0.54328					82.472	11.734	1.05606	1.49841				5.903	1.354	0.075588	0.172903				130.355	13.33	1.9556	2.08975				2.939	1.649	0.0440913	0.258514
			36.313	3.382	0.64561	0.336269				11.097	4.292	0.197294	0.42675					63.515	8.199	0.813311	1.047				63.422	4.12	0.81212	0.526116				185.745	10.475	2.78657	1.64217				1.062	3.748	0.0159323	0.587574
			38.091	2.443	0.677221	0.242905				19.23	5.222	0.341891	0.519219					65.693	8.307	0.8412	1.06079				16.677	99.475	0.213549	12.7028				130.837	11.529	1.96283	1.8074				5.237	55.283	0.0785662	8.66672
			35.934	3.15	0.638872	0.313202				22.057	5.362	0.392152	0.533139					42.335	6.345	0.5421	0.810245				88.544	6.714	1.13381	0.857365				151.582	12.682	2.27405	1.98816				5.473	56.878	0.0821067	8.91677
			28.036	3.449	0.498453	0.342931				18.357	5.045	0.32637	0.50162					54.319	8.42	0.695556	1.07522				13.744	113.991	0.175992	14.5564				197.72	12.215	2.96622	1.91495				0.617	1.355	0.00925632	0.212424
			30.153	2.811	0.536091	0.279495				18.112	5.729	0.322014	0.569629					58.716	8.477	0.751859	1.0825				18.623	112.85	0.238468	14.4107				93.638	11.552	1.40477	1.81101				0.932	2.049	0.013982	0.321222
			40.476	2.677	0.719624	0.266172				15.54	4.658	0.276286	0.463141					41.483	6.468	0.53119	0.825951				8.019	109.101	0.102683	13.932				130.933	18.063	1.96427	2.83174				7.362	69.639	0.110446	10.9173
			18.356	2.401	0.326352	0.238729				10.934	5.091	0.194396	0.506193					59.618	8.068	0.763409	1.03027				51.384	3.86	0.657973	0.492915				167.332	12.305	2.51034	1.92906				6.463	19.95	0.0969588	3.12756
			28.356	3.281	0.504142	0.326227				1.926	173.984	0.0342424	17.2991					53.222	7.73	0.681509	0.987106				25.038	63.089	0.320612	8.05635				145.318	11.086	2.18008	1.73795				7.025	81.411	0.10539	12.7628
			47.559	3.586	0.845553	0.356553				22.812	5.081	0.405575	0.505199					52.669	6.349	0.674427	0.810755				13.261	79.906	0.169807	10.2038				143.547	10.906	2.15351	1.70973				6.44	64.638	0.0966137	10.1333
			29.057	3.441	0.516605	0.342135				19.13	5.391	0.340113	0.536022					58.282	7.564	0.746302	0.965909				30.12	74.248	0.385687	9.48133				157.749	10.323	2.36657	1.61834				1.745	3.55	0.0261787	0.556534
			20.53	2.381	0.365004	0.236741				11.126	4.444	0.19781	0.441863					36.884	7.226	0.4723	0.922747				13.109	65.042	0.167861	8.30574				120.606	9.583	1.80935	1.50233				5.365	28.774	0.0804864	4.5109
			24.746	3.116	0.43996	0.309821				12.732	5.244	0.226363	0.521406					34.833	7.841	0.446037	1.00128				23.497	150.818	0.300879	19.2592				138.075	11.13	2.07142	1.74485				7.339	67.276	0.110101	10.5469
			69.681	4.393	1.23886	0.436792				10.828	4.427	0.192511	0.440172					68.927	8.441	0.882611	1.0779				15.263	127.12	0.195443	16.233				111.603	12.241	1.67428	1.91902				6.005	93.01	0.0900878	14.5812
			31.646	3.068	0.562635	0.305048				12.107	5.273	0.215251	0.524289					59.566	8.48	0.762744	1.08288				18.636	121.301	0.238634	15.4899				90.842	12.67	1.36282	1.98628				4.264	54.147	0.0639691	8.48863
			56.934	5.465	1.01223	0.54338				11.071	4.553	0.196832	0.452701					57.786	8.856	0.739951	1.13089				7.303	92.209	0.093515	11.7749				113.013	10.359	1.69544	1.62398				6.454	86.649	0.0968238	13.584
			25.127	3	0.446734	0.298287				15.093	5.297	0.268339	0.526676					74.189	7.628	0.949991	0.974081				22.568	155.986	0.288984	19.9191				131.7	11.204	1.97578	1.75645				6.1	96.092	0.091513	15.0644
			29.816	3.469	0.5301	0.344919				20.442	4.194	0.363439	0.417006					72.049	8.293	0.922589	1.059				12.085	79.697	0.154749	10.1772				149.358	11.997	2.24069	1.88077				5.146	51.557	0.077201	8.0826
			19.137	2.983	0.340237	0.296597				2.719	143.151	0.0483412	14.2334					72.667	10.271	0.930502	1.31159				24.668	139.556	0.315874	17.821				132.188	11.944	1.9831	1.87246				5.946	62.707	0.0892027	9.83058
			47.633	4.388	0.846869	0.436295				15.688	5.671	0.278917	0.563862					65.217	9.015	0.835105	1.1512				16.309	78.262	0.208837	9.99391				132.618	12.34	1.98955	1.93454				7.201	93.53	0.10803	14.6627
			35.251	3.494	0.626729	0.347405				14.737	5.257	0.26201	0.522699					50.795	8.378	0.650431	1.06985				25.196	184.025	0.322635	23.4996				117.048	11.786	1.75597	1.84769				5.585	55.154	0.0837869	8.6465
			32.655	3.402	0.580574	0.338258				11.923	4.578	0.211979	0.455186					62.909	10.391	0.805551	1.32691				22.279	145.788	0.285283	18.6169				141.447	10.461	2.12201	1.63997				7.265	84.796	0.10899	13.2935
			21.185	2.113	0.376649	0.210094				12.413	4.895	0.220691	0.486705					62.187	8.616	0.796306	1.10025				11.281	63.113	0.144453	8.05941				105.265	12.48	1.5792	1.95649				8.39	80.273	0.125868	12.5844
			46.941	4.398	0.834566	0.437289				14.496	5.322	0.257725	0.529162					64.233	8.76	0.822505	1.11864				26.214	192.83	0.335671	24.624				162.838	12.44	2.44292	1.95022				2.189	18.407	0.0328397	2.88567
			73.468	4.067	1.30619	0.404378				1.863	139.26	0.0331223	13.8465					86.851	10.12	1.11213	1.2923				14.436	12.265	0.184853	1.56622				164.258	11.613	2.46422	1.82057				5.638	84.427	0.084582	13.2356
			38.153	4.135	0.678323	0.411139				8.037	3.988	0.14289	0.396523					78.367	9.716	1.00349	1.24071				14.755	61.171	0.188938	7.81142				111.039	10.705	1.66582	1.67822				7.84	89.157	0.117617	13.9772
			43.811	4.435	0.778917	0.440968				17.87	5.532	0.317711	0.550042					117.729	8.256	1.50752	1.05428				21.537	92.269	0.275782	11.7826				93.693	9.159	1.40559	1.43586				0.652	2.635	0.00978139	0.413089
			23.622	3.211	0.419976	0.319267				11.967	4.59	0.212762	0.456379					33.833	3.098	0.433232	0.395609				18.715	146.094	0.239646	18.6559				101.822	10.808	1.52755	1.69437				7.103	99.32	0.10656	15.5704
			51.202	4.095	0.910322	0.407162				15.513	4.951	0.275806	0.492273					47.688	4.27	0.610646	0.545271				23.819	173.737	0.305003	22.1859				148.923	12.662	2.23416	1.98502				5.056	46.706	0.0758508	7.3221
			34.195	3.04	0.607954	0.302264				14.199	4.042	0.252444	0.401892					35.611	2.693	0.455999	0.343891				18.049	88.093	0.231118	11.2493				93.898	9.84	1.40867	1.54262				7.249	85.571	0.10875	13.415
			68.015	4.68	1.20924	0.465328				15.352	4.604	0.272944	0.457771					93.166	7.722	1.19299	0.986085				11.845	105.565	0.151675	13.4805				67.715	6.772	1.01587	1.06165				6.219	53.969	0.0932983	8.46073
			101.443	4.515	1.80356	0.448922				14.195	5.052	0.252373	0.502316					81.111	5.871	1.03863	0.749716				28.494	149.857	0.364866	19.1365				122.837	12.882	1.84282	2.01951				6.584	66.503	0.098774	10.4257
			96.568	4.48	1.71689	0.445442				13.049	4.896	0.231999	0.486805					76.783	8.144	0.983208	1.03997				14.312	138.149	0.183265	17.6414				67.812	7.435	1.01732	1.16559				1.741	5.596	0.0261187	0.877286
			111.465	4.998	1.98174	0.496946				3.157	192.064	0.0561284	19.0967					56.216	5.574	0.719847	0.711789				17.059	73.315	0.218441	9.36219				131.26	13.635	1.96918	2.13756				6.372	75.388	0.0955936	11.8186
			111.031	5.403	1.97402	0.537215				12.965	5.672	0.230505	0.563962					35.254	3.934	0.451428	0.502364				2.095	1.932	0.0268265	0.246713				56.053	7.848	0.840915	1.23033				1.025	2.261	0.0153772	0.354457
			98.513	4.65	1.75147	0.462345				16.602	5.092	0.295168	0.506293					40.69	3.277	0.521036	0.418467				30.957	130.721	0.396405	16.6928				134.214	11.615	2.0135	1.82088				5.071	96.338	0.0760758	15.1029
			78.371	6.434	1.39336	0.639727				13.32	4.194	0.236817	0.417006					37.137	3.37	0.47554	0.430343				26.093	61.532	0.334121	7.85752				97.475	10.795	1.46233	1.69233				3.916	63.277	0.0587484	9.91994
			13.598	46.082	0.241759	4.58189				16.465	5.658	0.292732	0.56257					25.036	7.94	0.320586	1.01392				17.587	56.521	0.225202	7.21763				96.625	8.828	1.44958	1.38397				4.56	51.968	0.0684097	8.14703
			144.168	6.577	2.56317	0.653945				17.775	4.855	0.316022	0.482728					77.274	7.302	0.989495	0.932452				18.865	151.338	0.241567	19.3256				85.784	7.303	1.28694	1.14489				28.179	1.252	0.422745	0.196276
			51.471	5.078	0.915105	0.504901				18.676	5.48	0.332041	0.544871					57.828	5.728	0.740488	0.731455				18.381	159.51	0.235369	20.3691				60.294	7.52	0.904539	1.17891				26.353	1.316	0.395351	0.206309
			52.541	5.53	0.934128	0.549843				14.277	6.075	0.253831	0.604032					64.502	8.021	0.825949	1.02427				16.27	83.635	0.208338	10.68				71.686	7.729	1.07544	1.21168				0.887	9.072	0.0133069	1.42222
			137.05	5.548	2.43662	0.551632				13.984	4.721	0.248622	0.469405					30.374	5.095	0.38894	0.650622				13.629	51.444	0.17452	6.5693				70.111	8.27	1.05181	1.29649				27.109	1.724	0.406693	0.270272
			46.385	5.01	0.82468	0.49814				18.437	4.729	0.327792	0.4702					68.9	7.567	0.882266	0.966292				29.013	175.318	0.371512	22.3878				99.374	8.79	1.49082	1.37801				0.937	1.102	0.014057	0.172761
			62.29	7.828	1.10746	0.778331				22.735	5.454	0.404206	0.542286					111.129	9.66	1.42301	1.23356				14.064	72.161	0.18009	9.21482				64.865	7.695	0.973113	1.20635				5.816	70.001	0.0872524	10.9741
			50.086	5.618	0.890481	0.558593				13.065	5.036	0.232283	0.500725					108.341	10.526	1.38731	1.34415				11.385	66.61	0.145785	8.50597				72.796	6.809	1.0921	1.06745				7.117	149.93	0.10677	23.5045
			54.508	5.729	0.9691	0.569629				19.88	5.325	0.353447	0.52946					33.895	4.958	0.434026	0.633127				26.585	170.314	0.340421	21.7488				81.514	8.359	1.22288	1.31044				35.061	2.084	0.52599	0.326709
			39.217	4.426	0.69724	0.440073				13.132	4.12	0.233474	0.409648					93.215	8.661	1.19362	1.10599				12.348	46.828	0.158116	5.97985				55.96	8.144	0.839519	1.27674				2.819	33.776	0.042291	5.29507
			63.906	4.682	1.13619	0.465527				11.676	5.61	0.207588	0.557797					28.868	3.109	0.369655	0.397013				20.855	77.772	0.267049	9.93134				64.133	8.762	0.962132	1.37362				6.33	99.637	0.0949635	15.6201
			37.046	6.462	0.658642	0.642511				14.793	4.641	0.263005	0.46145					58.679	3.673	0.751386	0.469035				15.976	47.898	0.204573	6.11648				48.121	7.879	0.721918	1.23519				5.813	94.933	0.0872074	14.8827
			51.333	3.871	0.912651	0.38489				19.944	4.828	0.354585	0.480044					87.588	6.766	1.12157	0.864005				14.888	70.926	0.190641	9.05712				94.612	7.93	1.41938	1.24319				2.861	26.86	0.0429211	4.21085
			44.217	4.529	0.786135	0.450314				12.851	4.55	0.228478	0.452402					60.723	4.108	0.777559	0.524584				12.492	78.807	0.15996	10.0635				95.723	8.711	1.43605	1.36562				17.593	1.849	0.263933	0.289868
			6.45	17.381	0.114675	1.72818				10.868	4.669	0.193223	0.464234					92.972	6.484	1.19051	0.827995				20.838	78.788	0.266831	10.0611				82.086	8.313	1.23147	1.30323				4.378	77.26	0.0656793	12.1121
			62.962	4.722	1.1194	0.469504				16.388	5.238	0.291363	0.520809					65.84	6.592	0.843082	0.841786				15.81	62.949	0.202447	8.03847				57.342	8.473	0.860252	1.32831				0.944	3.899	0.014162	0.611247
			62.639	4.443	1.11366	0.441763				15.814	4.81	0.281158	0.478254					83.334	8.944	1.06709	1.14213				2.794	0.981	0.0357772	0.125272				93.954	8.851	1.40951	1.38757				27.41	1.347	0.411208	0.211169
			6.365	13.081	0.113164	1.30063				15.844	4.329	0.281691	0.430428					89.036	8.724	1.14011	1.11404				3.868	2.206	0.0495298	0.281702				80.189	7.811	1.20301	1.22453				5.819	71.193	0.0872974	11.1609
			53.363	4.489	0.948743	0.446337				15.767	3.649	0.280322	0.362817					75.948	6.56	0.972515	0.8377				7.521	26.577	0.0963065	3.39383				86.479	7.841	1.29737	1.22923				2.889	2.653	0.0433412	0.415911
			48.728	5.287	0.866337	0.525681				3.002	188.333	0.0533727	18.7258					110.142	9.098	1.41037	1.1618				5.537	3.26	0.0709014	0.416296				80.598	8.508	1.20914	1.3338				5.28	83.994	0.0792113	13.1677
			54.701	4.306	0.972531	0.428142				6.539	108.02	0.116257	10.7403					80.692	7.746	1.03326	0.98915				3.864	1.417	0.0494786	0.180948				58.147	8.513	0.872329	1.33458				2.663	2.6	0.0399507	0.407602
			37.97	4.209	0.67507	0.418497				7.993	9.869	0.142108	0.981266					54.859	5.031	0.70247	0.642449				6.182	18.236	0.0791606	2.3287				82.761	7.947	1.24159	1.24585				5.935	91.202	0.0890377	14.2977
			24.956	3.916	0.443694	0.389364				5.827	102.656	0.103598	10.207					44.055	3.366	0.564125	0.429832				4.35	24.253	0.0557018	3.09706				44.343	7.907	0.66524	1.23958				26.842	1.695	0.402687	0.265725
			16.302	13.726	0.289834	1.36476				3.958	154.062	0.0703694	15.3182					65.822	7.02	0.842852	0.896441				3.83	23.581	0.0490432	3.01125				74.08	7.958	1.11136	1.24758				6.092	89.615	0.091393	14.049
			41.471	4.182	0.737314	0.415812				3.119	211.033	0.0554528	20.9828					107.62	9.028	1.37808	1.15286				5.312	43.591	0.0680202	5.56649				62.418	8.529	0.936403	1.33709				5.553	67.488	0.0833068	10.5801
			70.913	4.948	1.26076	0.491975				5.727	140.97	0.101821	14.0165					2.632	3.267	0.0337028	0.41719				6.456	39.247	0.0826692	5.01177				72.787	9.399	1.09196	1.47348				1.277	3.444	0.0191577	0.539916
			35.649	4.378	0.633805	0.4353				20.46	3.3	0.363759	0.328116					82.211	6.908	1.05271	0.882139				7.525	48.967	0.0963577	6.25299				5.225	2.249	0.0783861	0.352576				1.191	3.253	0.0178675	0.509973
			39.454	3.911	0.701454	0.388867				3.4	225.152	0.0604487	22.3867					66.541	5.222	0.852059	0.66684				3.443	0.849	0.0440877	0.108416				68.105	7.848	1.02172	1.23033				5.087	59.02	0.0763158	9.25257
			45.584	4.025	0.810439	0.400202				3.195	204.937	0.056804	20.3767					42.165	4.644	0.539923	0.59303				5.142	40.14	0.0658434	5.1258				89.404	8.554	1.34125	1.34101				5.951	80.713	0.0892777	12.6534
			56.739	4.858	1.00876	0.483026				17.004	3.036	0.302315	0.301867					61.081	5.453	0.782143	0.696338				4.536	17.923	0.0580836	2.28873				43.263	5.671	0.649037	0.889043				23.132	6.259	0.347029	0.981224
			39.858	4.562	0.708637	0.453595				4.036	159.469	0.0717562	15.8559					35.387	3.8	0.453131	0.485253				3.93	7.257	0.0503237	0.926705				73.099	9.182	1.09664	1.43946				5.592	69.633	0.0838919	10.9164
			53.932	4.344	0.958859	0.43192				13.177	3.373	0.234274	0.335374					27.014	3.038	0.345915	0.387947				2.318	1.073	0.029682	0.13702				75.801	8.313	1.13718	1.30323				3.99	53.566	0.0598585	8.39755
			30.262	6.178	0.538029	0.614273				12.629	25.168	0.224531	2.50243					111.349	8.994	1.42583	1.14852				6.3	21.064	0.0806716	2.68983				71.38	8.586	1.07085	1.34603				3.957	42.075	0.0593634	6.5961
			25.316	4.142	0.450094	0.411835				13.937	116.299	0.247786	11.5635					73.642	7.593	0.942987	0.969612				4.22	36.433	0.0540372	4.65243				87.182	6.844	1.30792	1.07293				35.577	1.68	0.533731	0.263374
			63.435	3.896	1.12781	0.387376				6.375	118.53	0.113341	11.7853					61.609	5.502	0.788904	0.702595				5.988	3.203	0.0766764	0.409017				77.121	7.146	1.15698	1.12028				7.285	86.314	0.109291	13.5315
			85.186	4.283	1.51452	0.425855				17.764	2.875	0.315827	0.285859					121.212	9.787	1.55212	1.24978				2.314	1.089	0.0296308	0.139063				78.732	8.428	1.18115	1.32126				6.806	69.894	0.102105	10.9573
			58.815	4.463	1.04567	0.443752				2.395	40.079	0.0425808	3.98502					75.004	6.262	0.960427	0.799646				4.289	0.952	0.0549207	0.121569				78.247	7.405	1.17387	1.16088				7.756	90.299	0.116357	14.1562
			42.703	3.893	0.759218	0.387077				7.574	135.855	0.134658	13.5079					92.957	7.266	1.19032	0.927854				8.974	51.205	0.114912	6.53878				75.692	8.335	1.13554	1.30668				5.069	47.594	0.0760458	7.46132
			59.706	4.902	1.06151	0.487401				2.872	169.878	0.0510614	16.8908					79.229	6.899	1.01453	0.880989				4.676	33.044	0.0598763	4.21966				67.457	7.471	1.012	1.17123				3.466	40.553	0.0519974	6.3575
			54.089	4.264	0.96165	0.423966				6.878	131.873	0.122284	13.112					63.049	6.987	0.807343	0.892227				9.05	26.761	0.115885	3.41733				64.098	7.905	0.961607	1.23927				1.013	12.295	0.0151972	1.92749
			32.773	5.04	0.582672	0.501123				3.086	63.96	0.0548661	6.35948					11.649	5.493	0.149166	0.701446				5.228	3.562	0.0669446	0.454861				64.101	7.788	0.961652	1.22093				4.169	56.23	0.0625439	8.81518
			60.212	4.643	1.07051	0.461649				2.607	67.91	0.0463499	6.75223					78.208	7.627	1.00145	0.973954				5.029	44.373	0.0643964	5.66635				15.452	28.447	0.231813	4.45964				3.653	51.854	0.0548028	8.12916
			44.263	4.649	0.786953	0.462246				3.148	75.527	0.0559684	7.50958					59.551	4.533	0.762552	0.578856				3.045	20.306	0.0389913	2.59304				61.636	8.376	0.924671	1.31311				6.23	95.733	0.0934633	15.0081
			51.063	4.71	0.907851	0.468311				5.451	102.982	0.0969135	10.2394					66.588	6.725	0.85266	0.85877				8.154	35.368	0.104412	4.51643				82.05	8.114	1.23092	1.27203				7.406	131.296	0.111106	20.5833
			46.077	4.627	0.819204	0.460058				2.791	89.661	0.0496213	8.91491					84.875	7.787	1.08683	0.994385				6.833	34.141	0.0874967	4.35974				107.035	8.125	1.60575	1.27376				2.546	10.249	0.0381954	1.60674
			40.325	3.511	0.71694	0.349095				3.355	110.953	0.0596487	11.032					3.975	6.585	0.0508999	0.840892				3.339	0.894	0.0427559	0.114162				66.676	9.492	1.00028	1.48806				4.17	23.687	0.0625589	3.71341
			43.359	3.483	0.770881	0.346311				4.174	113.939	0.0742097	11.3288					34.237	2.945	0.438405	0.376071				5.081	31.17	0.0650623	3.98035				67.332	8.566	1.01012	1.34289				7.631	92.85	0.114481	14.5561
			62.919	24.931	1.11864	2.47887				4.955	107.465	0.0880951	10.6851					52.839	6.357	0.676604	0.811777				5.496	19.277	0.0703764	2.46164				50.683	7.916	0.760353	1.24099				6.658	108.581	0.0998842	17.0223
			47.349	4.173	0.841819	0.414918				13.138	14.144	0.233581	1.40632					79.949	6.54	1.02375	0.835146				3.223	0.613	0.0412706	0.0782789				70.826	7.568	1.06254	1.18644				6.125	76.007	0.0918881	11.9156
			54.304	3.776	0.965473	0.375444				2.85	166.664	0.0506702	16.5712					102.8	7.966	1.31636	1.01724				8.343	0.709	0.106832	0.090538				32.535	4.914	0.488094	0.770368				4.942	28.407	0.0741405	4.45337
			49.379	4.157	0.877911	0.413327				3.371	92.554	0.0599331	9.20256					54.656	6.41	0.699871	0.818545				6.505	35.271	0.0832966	4.50404				80.767	8.126	1.21168	1.27391				8.941	114.02	0.134134	17.8749
			49.197	3.819	0.874675	0.37972				3.806	120.717	0.067667	12.0028					65.371	6.505	0.837077	0.830676				5.06	16.741	0.0647934	2.13779				78.798	7.716	1.18214	1.20964				3.644	23.737	0.0546678	3.72125
			53.409	3.747	0.94956	0.372561				11.58	15.651	0.205881	1.55616					63.674	7.94	0.815347	1.01392				9.639	44.627	0.123428	5.69878				44.807	7.931	0.672201	1.24334				8.646	117.495	0.129708	18.4197
			39.427	4.533	0.700974	0.450712				3.24	171.419	0.0576041	17.044					76.083	8.09	0.974244	1.03308				3.48	40.387	0.0445615	5.15734				33.772	9.417	0.506652	1.4763				7.101	101.696	0.10653	15.9429
			49.953	3.784	0.888116	0.37624				20.562	113.667	0.365572	11.3018					125.708	9.405	1.60969	1.201				6.31	44.196	0.0807997	5.64375				71.396	7.788	1.07109	1.22093				7.522	95.771	0.112846	15.014
			37.345	4.166	0.663958	0.414222				23.588	119.922	0.419372	11.9237					54.307	7.48	0.695402	0.955182				4.579	21.847	0.0586342	2.78982				74.801	9.638	1.12217	1.51095				1.464	23.297	0.0219631	3.65227
			57.691	4.574	1.02569	0.454789				4.534	141.642	0.0806101	14.0833					46.5	3.386	0.595433	0.432386				11.472	47.001	0.146899	6.00194				60.556	7.41	0.908469	1.16167				6.567	70.737	0.098519	11.0894
			58.293	4.461	1.03639	0.443553				4.75	167.561	0.0844504	16.6604					99.562	6.891	1.27489	0.879968				8.155	47.998	0.104425	6.12925				64.597	6.929	0.969093	1.08626				5.401	46.946	0.0810265	7.35973
			69.496	4.67	1.23557	0.464334				5.281	31.93	0.0938911	3.17477					69.049	5.681	0.884174	0.725453				56.861	4.751	0.728106	0.606694				76.199	6.402	1.14315	1.00364				6.678	71.945	0.100184	11.2788
			86.659	4.277	1.54071	0.425258				3.513	152.107	0.0624577	15.1239					17.208	8.075	0.220349	1.03116				5.652	32.783	0.072374	4.18633				55.237	6.585	0.828673	1.03233				2.419	4.183	0.0362902	0.655769
			31.689	3.635	0.5634	0.361425				11.444	15.694	0.203463	1.56044					66.693	8.44	0.854005	1.07777				6.608	44.209	0.0846155	5.64541				73.425	7.571	1.10153	1.18691				22.44	64.109	0.336648	10.0504
			38.871	3.351	0.691089	0.333187				8.057	60.427	0.143246	6.0082					46.998	5.394	0.60181	0.688804				89.707	3.469	1.1487	0.442985				64.799	7.968	0.972123	1.24914				3.97	34.047	0.0595585	5.33755
			44.027	4.048	0.782757	0.402489				4.727	3.893	0.0840415	0.387077					108.489	9.293	1.3892	1.1867				11.405	37.249	0.146041	4.75663				61.907	7.61	0.928737	1.19302				0.622	3.33	0.00933133	0.522044
			44.2	4.027	0.785833	0.400401				25.553	2.075	0.454308	0.206315					86.145	7.132	1.10309	0.910743				9.597	48.55	0.12289	6.19974				60.879	8.382	0.913315	1.31405				6.156	61.756	0.0923531	9.6815
			92.107	5.204	1.63757	0.517429				21.321	2.522	0.379067	0.25076					66.521	4.842	0.851802	0.618314				8.318	68.661	0.106512	8.76788				65.321	7.094	0.979954	1.11213				17.41	48.632	0.261187	7.62404
			49.806	3.837	0.885503	0.381509				2.713	31.146	0.0482345	3.09682					74.502	6.592	0.953999	0.841786				8.732	60.94	0.111813	7.78192				61.034	7.14	0.91564	1.11934				9.558	100.513	0.14339	15.7574
			38.985	3.68	0.693116	0.365899				25.978	2.779	0.461864	0.276313					64.195	5.35	0.822018	0.683185				9.003	69.696	0.115284	8.90005				61.804	5.875	0.927192	0.921024				8.196	84.258	0.122957	13.2091
			49.856	4.528	0.886391	0.450215				22.66	2.427	0.402873	0.241314					35.168	2.162	0.450327	0.276083				10.814	53.247	0.138473	6.79954				90.753	7.823	1.36149	1.22641				4.617	56.435	0.0692648	8.84732
			70.668	5.558	1.25641	0.552627				13.145	2.95	0.233705	0.293316					4.344	6.965	0.055625	0.889417				8.064	52.507	0.10326	6.70504				76.495	7.381	1.14759	1.15712				5.554	72.796	0.0833218	11.4122
			63.968	4.672	1.13729	0.464533				20.115	2.66	0.357625	0.264481					83.521	7.734	1.06949	0.987617				14.935	59.998	0.191243	7.66163				51.228	6.992	0.768529	1.09614				7.968	74.535	0.119537	11.6849
			38.149	3.849	0.678252	0.382702				12.429	1.587	0.220976	0.157794					96.601	7.618	1.23698	0.972804				11.847	68.64	0.151701	8.7652				93.523	8.216	1.40304	1.28802				3.667	53.623	0.0550128	8.40648
			49.938	4.388	0.887849	0.436295				16.78	1.933	0.298332	0.192196					36.256	2.972	0.464259	0.379519				17.469	47.031	0.223691	6.00577				78.013	8.226	1.17036	1.28959				8.215	141.11	0.123243	22.1218
			80.32	5.292	1.42801	0.526179				12.628	1.747	0.224514	0.173703					85.551	6.368	1.09548	0.813182				13.438	44.747	0.172074	5.71411				72.461	6.872	1.08707	1.07732				7.505	85.56	0.112591	13.4133
			51.365	4.058	0.91322	0.403483				16.072	1.428	0.285745	0.141985					45.276	5.904	0.57976	0.75393				8.254	22.271	0.105693	2.84396				85.776	7.962	1.28682	1.2482				5.709	63.687	0.0856472	9.98422
			83.147	4.874	1.47827	0.484617				17.259	2.523	0.306848	0.25086					60.589	6.304	0.775843	0.805009				11.659	47.715	0.149294	6.09312				59.956	6.967	0.899468	1.09222				7.473	122.335	0.112111	19.1785
			50.017	3.937	0.889254	0.391452				17.574	2.633	0.312449	0.261797					32.809	3.895	0.42012	0.497384				10.569	46.06	0.135336	5.88178				73.891	7.49	1.10852	1.17421				1.591	3.714	0.0238684	0.582244
			36.185	3.589	0.643334	0.356851				18.08	1.821	0.321445	0.18106					74.944	7.998	0.959659	1.02133				8.515	40.381	0.109035	5.15658				66.533	7.631	0.998137	1.19631				7.877	108.95	0.118172	17.0801
			49.407	4.399	0.878409	0.437388				22.395	1.959	0.398161	0.194782					59.432	7.924	0.761028	1.01188				18.473	36.282	0.236547	4.63314				42.159	8.09	0.632475	1.26827				4.533	75.697	0.0680047	11.867
			44.549	4.018	0.792038	0.399506				12.131	2.013	0.215677	0.200151					34.742	2.91	0.444872	0.371602				15.348	63.816	0.196531	8.14918				37.956	5.923	0.569421	0.928549				8.11	73.852	0.121667	11.5778
			46.834	4.736	0.832663	0.470896				15.854	2.025	0.281869	0.201344					46.392	3.72	0.59405	0.475037				20.141	40.934	0.257906	5.22719				29.057	9.362	0.435917	1.46768				3.105	30.884	0.0465816	4.84169
			39.031	3.765	0.693933	0.37435				19.188	1.505	0.341144	0.149641					110.563	9.009	1.41576	1.15043				15.934	0.778	0.204035	0.0993491				54.783	7.88	0.821862	1.23535				5.596	62.508	0.0839519	9.79939
			74.421	4.302	1.32313	0.427744				20.044	1.602	0.356363	0.159285					81.077	7.332	1.03819	0.936283				7.664	27.258	0.0981376	3.4808				62.963	5.826	0.944579	0.913343				8.15	109.227	0.122267	17.1235
			50.17	5.001	0.891974	0.497245				15.937	1.759	0.283344	0.174896					60.79	5.281	0.778417	0.674374				8.842	28.399	0.113222	3.6265				60.875	6.058	0.913255	0.949713				6.695	100.746	0.100439	15.794
			48.623	4.177	0.86447	0.415315				14.075	1.494	0.25024	0.148547					47.45	6.134	0.607598	0.7833				15.712	43.604	0.201192	5.56815				81.289	8.983	1.21951	1.40827				4.675	65.995	0.070135	10.346
			64.022	5.063	1.13825	0.503409				18.661	1.474	0.331775	0.146558					80.364	7.375	1.02906	0.941774				16.256	59.446	0.208158	7.59114				80.933	8.058	1.21417	1.26325				7.325	86.085	0.109891	13.4956
			66.778	4.405	1.18725	0.437985				18.749	1.503	0.333339	0.149442					8.774	7.156	0.112351	0.913808				8.309	29.492	0.106397	3.76607				79.084	7.98	1.18643	1.25103				6.33	33.042	0.0949635	5.18
			61.261	4.059	1.08916	0.403583				18.194	1.401	0.323472	0.1393					44.661	6.8	0.571885	0.868347				21.471	47.067	0.274936	6.01037				59.626	6.435	0.894517	1.00882				7.724	100.083	0.115876	15.69
			73.441	4.011	1.30571	0.39881				15.606	1.352	0.27746	0.134428					37.16	3.743	0.475834	0.477974				7.801	30.286	0.0998919	3.86747				44.952	8.368	0.674376	1.31185				34.03	2.265	0.510523	0.355084
			64.795	4.583	1.15199	0.455683				13.431	1.296	0.23879	0.12886					46.649	5.559	0.597341	0.709874				5.639	4.142	0.0722075	0.528926				96.662	7.473	1.45014	1.17154				6.062	45.334	0.0909429	7.10702
			64.407	4.413	1.14509	0.43878				8.051	1.474	0.143139	0.146558					30.625	3.714	0.392154	0.474271				12.409	46.296	0.158897	5.91191				62.376	6.035	0.935773	0.946108				5.012	22.463	0.0751907	3.52153
			66.503	4.752	1.18236	0.472487				18.347	1.345	0.326192	0.133732					71.079	8.105	0.910168	1.03499				10.98	51.871	0.140599	6.62383				75.747	7.436	1.13637	1.16574				6.044	74.365	0.0906729	11.6582
			79.591	5.1	1.41505	0.507088				12.479	1.327	0.221865	0.131942					50.052	3.474	0.640917	0.443623				11.668	53.594	0.149409	6.84385				68.555	6.997	1.02847	1.09692				4.193	9.206	0.0629039	1.44323
			76.87	4.533	1.36667	0.450712				15.766	1.297	0.280304	0.12896					57.509	6.773	0.736404	0.864899				50.512	4.686	0.646807	0.598393				68.932	8.013	1.03413	1.2562				7.607	103.426	0.114121	16.2141
			77.35	4.385	1.37521	0.435996				13.813	1.155	0.245582	0.114841					45.538	3.722	0.583115	0.475292				4.22	39.772	0.0540372	5.07881				79.3	7.996	1.18967	1.25353				3.641	17.169	0.0546228	2.69159
			66.995	4.463	1.19111	0.443752				14.029	1.415	0.249422	0.140692					65.086	4.301	0.833427	0.54923				53.215	4.656	0.681419	0.594562				75.659	8.114	1.13505	1.27203				4.778	14.167	0.0716802	2.22096
			76.187	4.652	1.35453	0.462544				12.417	1.509	0.220762	0.150038					67.119	6.596	0.85946	0.842297				4.543	42.024	0.0581732	5.36639				55.458	6.939	0.831988	1.08783				28.762	2.344	0.431491	0.367469
			42.022	4.137	0.747111	0.411338				6.746	1.094	0.119937	0.108775					51.246	7.353	0.656206	0.938964				47.349	6.89	0.606305	0.87984				63.484	8.077	0.952395	1.26623				7.387	125.718	0.110821	19.7088
			62.326	4.987	1.1081	0.495853				10.259	1.274	0.182395	0.126673					60.127	5.564	0.769927	0.710512				11.281	76.454	0.144453	9.76303				62.925	9.087	0.944009	1.42457				2.549	13.028	0.0382404	2.0424
			44.88	4.189	0.797923	0.416508				11.562	1.117	0.205561	0.111062					5.891	5.834	0.0754343	0.744991				14.817	2.293	0.189732	0.292812				72.983	7.226	1.0949	1.13282				3.678	10.387	0.0551778	1.62837
			56.909	4.236	1.01179	0.421182				8.531	1.18	0.151673	0.117326					76.76	8.069	0.982913	1.0304				49.545	8.076	0.634425	1.03129				85.121	7.372	1.277	1.15571				2.555	16.815	0.0383304	2.63609
			90.377	4.502	1.60682	0.44763				11.055	1.298	0.196547	0.129059					61.344	4.752	0.785511	0.606821				25.788	3.003	0.330216	0.383477				54.126	9.18	0.812005	1.43915				3.817	53.474	0.0572631	8.38312
			50.932	4.544	0.905522	0.451806				13.777	1.406	0.244942	0.139797					44.773	5.558	0.573319	0.709746				9.487	5.949	0.121481	0.759676				79.11	7.168	1.18682	1.12373				5.177	79.764	0.077666	12.5046
			53.242	4.797	0.946591	0.476961				11.059	1.067	0.196618	0.106091					57.135	5.776	0.731615	0.737584				68.501	7.156	0.877156	0.913808				61.515	7.537	0.922856	1.18158				4.888	60.595	0.0733304	9.49948
			62.894	4.613	1.11819	0.458666				13.36	1.366	0.237528	0.13582					40.263	5.126	0.515568	0.654581				31.71	4.457	0.406047	0.56915				59.628	5.372	0.894547	0.842169				3.876	50.426	0.0581483	7.90529
			75.669	5.077	1.34532	0.504801				12.172	1.169	0.216406	0.116233					63.42	4.473	0.812094	0.571194				45.93	5.853	0.588134	0.747417				68.227	7.854	1.02355	1.23127				4.105	55.752	0.0615838	8.74025
			63.42	4.281	1.12755	0.425656				6.133	1.254	0.109039	0.124684					47.78	7.021	0.611824	0.896568				43.622	5.435	0.55858	0.694039				73.393	8.971	1.10105	1.40638				4.127	61.215	0.0619138	9.59668
			71.493	5.095	1.27108	0.506591				13.156	1.02	0.233901	0.101418					55.808	5.638	0.714622	0.719962				41.936	4.201	0.536991	0.53646				73.403	7.122	1.1012	1.11652				6.767	50.437	0.101519	7.90701
			68.463	5.068	1.21721	0.503907				12.933	1.178	0.229936	0.117127					59.531	8.201	0.762295	1.04725				24.272	4.669	0.310803	0.596222				81.872	7.335	1.22825	1.14991				3.715	40.865	0.0557329	6.40641
			79.301	4.709	1.4099	0.468211				15.573	1.265	0.276873	0.125778					56.258	5.618	0.720385	0.717408				28.301	4.331	0.362395	0.553061				48.982	7.906	0.734834	1.23942				13.829	1.016	0.207464	0.159278
			71.166	4.746	1.26526	0.47189				11.774	1.435	0.20933	0.142681					86.868	5.254	1.11235	0.670926				15.874	2.993	0.203267	0.3822				69.537	8.479	1.0432	1.32925				5.726	63.421	0.0859022	9.94252
			36.082	4.695	0.641503	0.466819				15.285	1.021	0.271753	0.101517					71.055	7.212	0.90986	0.920959				50.221	5.844	0.643081	0.746268				54.82	7.175	0.822417	1.12483				4.599	37.353	0.0689948	5.85583
			124.464	3.676	2.21285	0.365501				6.781	1.305	0.12056	0.129755					70.753	6.983	0.905993	0.891716				64.392	6.52	0.824541	0.832592				66.824	7.064	1.0025	1.10742				20.141	1.646	0.302158	0.258044
			80.392	5.349	1.42929	0.531846				10.808	1.522	0.192156	0.151331					48.925	8.394	0.626485	1.0719				37.78	5.579	0.483774	0.712428				74.637	7.564	1.11971	1.18581				3.304	48.058	0.049567	7.53406
			130.989	5.286	2.32886	0.525582				11.716	1.188	0.208299	0.118122					51.623	7.109	0.661033	0.907806				27.467	6.872	0.351715	0.877541				69.729	7.482	1.04608	1.17295				5.974	23.599	0.0896227	3.69962
			69.81	3.329	1.24115	0.330999				13.878	1.336	0.246737	0.132837					64.688	9.365	0.828331	1.19589				35.732	6.383	0.457549	0.815097				80.366	7.642	1.20566	1.19804				3.98	37.718	0.0597085	5.91306
			53.487	4.994	0.950947	0.496549				12.53	1.12	0.222771	0.111361					41.701	6.393	0.533982	0.816374				48.199	5.387	0.617189	0.68791				63.169	6.603	0.94767	1.03515				10.337	1.303	0.155077	0.204271
			97.54	4.615	1.73417	0.458865				9.156	1.223	0.162785	0.121602					63.479	10.14	0.81285	1.29486				28.269	4.016	0.361985	0.512836				55.054	6.581	0.825927	1.0317				4.411	37.149	0.0661744	5.82385
			54.906	4.191	0.976176	0.416707				15.521	1.144	0.275948	0.113747					58.866	6.974	0.75378	0.890567				51.441	4.321	0.658703	0.551784				76.807	6.239	1.15227	0.978089				5.939	1.908	0.0890977	0.299117
			61.677	4.435	1.09656	0.440968				15.698	1.121	0.279095	0.11146					77.323	5.205	0.990122	0.664669				50.378	5.047	0.645091	0.644492				79.512	8.194	1.19285	1.28457				7.99	1.747	0.119867	0.273877
			39.951	4.786	0.71029	0.475868				14.366	1.011	0.255414	0.100523					66.185	7.426	0.8475	0.948286				33.088	4.76	0.423692	0.607843				72.254	7.315	1.08396	1.14677				2.125	1.018	0.0318795	0.159592
			49.721	4.355	0.883991	0.433014				12.214	1.182	0.217153	0.117525					19.157	6.057	0.245306	0.773467				44.282	5.506	0.567032	0.703106				59.227	7.535	0.888531	1.18126				5.177	59.16	0.077666	9.27452
			29.662	13.714	0.527362	1.36357				11.075	1.588	0.196903	0.157893					71.037	6.757	0.90963	0.862856				54.809	6.068	0.70183	0.774872				40.444	6.481	0.606746	1.01603				0.942	4.925	0.014132	0.772093
			15.186	77.534	0.269992	7.70913				5.074	27.868	0.0902108	2.77089					77.12	7.571	0.987523	0.966802				55.53	6.75	0.711063	0.861962				63.127	8.009	0.94704	1.25557				5.309	1.459	0.0796463	0.228728
			28.838	13.654	0.512712	1.3576				7.361	1.097	0.130871	0.109074					76.328	6.728	0.977381	0.859153				46.369	5.646	0.593756	0.720984				65.183	8.574	0.977884	1.34415				2.215	7.85	0.0332297	1.23065
			17.139	98.254	0.304715	9.7693				6.332	1.339	0.112577	0.133136					49.235	6.628	0.630455	0.846383				31.185	7.538	0.399324	0.962588				62.639	6.845	0.939719	1.07309				1.4	1.668	0.021003	0.261493
			17.143	102.654	0.304786	10.2068				12.366	1.13	0.219856	0.112355					68.697	6.942	0.879666	0.88648				56.618	6.835	0.724994	0.872817				73.777	6.401	1.10681	1.00349				3.833	34.461	0.0575032	5.40245
			31.57	18.732	0.561284	1.86251				14.612	2.224	0.259787	0.22113					31.82	6.82	0.407456	0.870901				56.028	6.636	0.717439	0.847405				31.506	3.595	0.472657	0.563589				3.9	1.104	0.0585083	0.173074
			18.448	49.384	0.327988	4.91021				10.375	1.378	0.184457	0.137013					51.812	5.747	0.663453	0.733881				31.052	6.871	0.397621	0.877414				80.008	7.636	1.20029	1.1971				1.201	1.242	0.0180176	0.194708
			42.143	4.476	0.749262	0.445045				7.217	1.898	0.128311	0.188716					63.856	5.248	0.817677	0.67016				46.325	4.647	0.593192	0.593413				50.109	6.577	0.751742	1.03108				1.468	3.893	0.0220231	0.610306
			6.88	6.764	0.12232	0.672538				2.593	39.244	0.046101	3.90199					91.68	8.218	1.17396	1.04942				43.219	5.893	0.55342	0.752525				58.555	7.913	0.87845	1.24052				1.33	1.544	0.0199528	0.242053
			29.839	37.637	0.530509	3.74221				7.528	1.421	0.133841	0.141289					44.329	7.288	0.567634	0.930664				4.427	27.371	0.0566878	3.49523				63.125	8.667	0.94701	1.35873				2.425	5.728	0.0363802	0.897979
			26.983	39.69	0.479732	3.94634				18.638	2.294	0.331366	0.22809					76.908	6.928	0.984808	0.884693				55.338	6.082	0.708604	0.77666				62.007	7.519	0.930237	1.17875				0.755	3.935	0.0113266	0.61689
			40.588	22.099	0.721615	2.19728				5.618	1.354	0.0998826	0.134627					78.149	8.914	1.0007	1.1383				36.298	6.511	0.464796	0.831442				63.295	7.194	0.94956	1.1278				0.579	1.665	0.00868623	0.261022
			43.326	4.015	0.770294	0.399208				6.316	1.359	0.112292	0.135124					76.647	5.752	0.981466	0.73452				52.046	4.256	0.66645	0.543483				63.735	6.641	0.956161	1.04111				5.675	76.162	0.0851371	11.9399
			21.511	103.024	0.382445	10.2436				11.478	1.246	0.204068	0.123889					44.761	5.686	0.573165	0.726091				55.025	6.505	0.704596	0.830676				48.71	7.28	0.730754	1.14129				5.595	68.24	0.0839369	10.698
			17.623	17.961	0.31332	1.78585				16.95	2.79	0.301355	0.277407					70.064	7.474	0.897171	0.954416				56.177	6.2	0.719347	0.791728				40.644	7.857	0.609747	1.23174				2.897	6.507	0.0434612	1.0201
			26.868	40.217	0.477687	3.99874				10.697	1.681	0.190182	0.16714					43.696	6.304	0.559528	0.805009				26.287	7.002	0.336605	0.894142				63.864	6.488	0.958096	1.01712				3.501	32.969	0.0525225	5.16855
			25.57	8.281	0.45461	0.823372				13.827	2.034	0.245831	0.202239					102.525	7.833	1.31283	1.00026				55.051	6.885	0.704929	0.879202				66.481	7.179	0.997357	1.12545				5.34	66.705	0.0801114	10.4574
			30.074	42.629	0.534687	4.23856				4.032	0.77	0.0716851	0.0765604					57.075	6.169	0.730846	0.78777				54.581	5.344	0.698911	0.682419				67.293	8.032	1.00954	1.25918				4.709	88.044	0.070645	13.8027
			46.768	3.158	0.83149	0.313997				10.262	1.661	0.182448	0.165152					67.792	7.484	0.868078	0.955693				42.577	6.763	0.545199	0.863622				17.329	3.408	0.259972	0.534273				3.881	53.235	0.0582233	8.34566
			19.95	22.08	0.354692	2.19539				10.851	1.428	0.19292	0.141985					83.74	5.705	1.07229	0.728518				9.331	65.36	0.119484	8.34635				56.733	5.791	0.851116	0.907856				0.983	6.527	0.0147471	1.02324
			29.111	32.738	0.517565	3.25511				4.258	3.685	0.0757031	0.366396					9.412	6.984	0.120521	0.891844				12.058	69.801	0.154403	8.91346				54.174	7.552	0.812726	1.18393				1.125	5.265	0.0168774	0.825395
			39.535	22.015	0.702894	2.18893				6.325	2.097	0.112452	0.208503					9.566	7.907	0.122493	1.00971				8.731	54.314	0.111801	6.9358				71.157	7.618	1.06751	1.19427				3.26	56.328	0.048907	8.83055
			23.037	69.158	0.409576	6.87632				7.534	1.344	0.133947	0.133633					79.521	6.25	1.01827	0.798113				5.309	33.821	0.0679818	4.31888				55.63	8.543	0.834569	1.33929				4.197	51.223	0.062964	8.03024
			41.785	4.519	0.742897	0.44932				5.037	3.469	0.089553	0.344919					12.468	7.722	0.159653	0.986085				29.823	5.678	0.381884	0.72507				56.871	7.318	0.853186	1.14724				1.111	5.809	0.0166674	0.910678
			47.106	4.704	0.837499	0.467714				16.929	4.245	0.300981	0.422076					88.533	7.515	1.13367	0.959651				11.381	81.15	0.145734	10.3627				53.604	6.467	0.804174	1.01383				3.543	58.309	0.0531526	9.14111
			33.4	16.896	0.59382	1.67995				14.785	3.869	0.262863	0.384691					13.012	6.92	0.166619	0.883671				41.427	5.507	0.530473	0.703234				56.048	6.83	0.84084	1.07074				3.587	70.577	0.0538126	11.0644
			45.273	3.755	0.80491	0.373356				15.648	3.85	0.278206	0.382802					80.744	6.542	1.03393	0.835401				51.669	5.006	0.661622	0.639257				47.012	6.266	0.70528	0.982322				2.531	31.127	0.0379704	4.87978
			21.212	33.757	0.377129	3.35643				20.247	3.645	0.359972	0.362419					73.653	6.642	0.943128	0.848171				8.992	59.359	0.115143	7.58003				55.435	7.252	0.831643	1.1369				3.47	58.574	0.0520574	9.18265
			10.899	15.373	0.193774	1.52852				11.235	3.006	0.199747	0.298884					90.643	9.124	1.16069	1.16512				54.917	6.068	0.703213	0.774872				42.05	9.142	0.63084	1.43319				4.756	66.655	0.0713501	10.4495
			17.773	33.109	0.315987	3.292				17.618	3.704	0.313231	0.368285					7.636	5.991	0.0977791	0.765039				46.255	6.442	0.592296	0.822631				57.217	6.17	0.858377	0.967272				4.149	44.718	0.0622438	7.01045
			16.826	33.776	0.29915	3.35832				8.604	3.482	0.152971	0.346212					70.907	5.865	0.907965	0.748949				12.97	69.864	0.166081	8.9215				48.522	5.724	0.727933	0.897352				3.723	52.267	0.0558529	8.1939
			18.946	145.558	0.336842	14.4727				11.098	3.483	0.197312	0.346311					11.932	7.589	0.152789	0.969101				55.997	7.216	0.717042	0.92147				46.581	7.653	0.698814	1.19976				4.819	61.808	0.0722953	9.68965
			15.987	32.001	0.284233	3.18183				10.404	3.101	0.184973	0.30833					67.379	6.63	0.862789	0.846638				54.578	7.168	0.698872	0.91534				57.66	5.64	0.865023	0.884183				4.354	51.925	0.0653193	8.14029
			15.936	38.057	0.283327	3.78397				11.678	3.472	0.207624	0.345218					87.858	8.171	1.12502	1.04342				2.756	1	0.0352906	0.127698				39.775	5.076	0.59671	0.795765				3.841	50.345	0.0576232	7.89259
			13.052	20.276	0.232052	2.01602				11.142	2.281	0.198094	0.226798					53.132	6.314	0.680356	0.806286				6.066	48.828	0.0776752	6.23524				47.515	6.907	0.712826	1.08281				3.283	28.538	0.049252	4.47391
			29.132	73.342	0.517939	7.29233				12.537	3.171	0.222896	0.31529					63.355	6.037	0.811262	0.770914				19.88	4.096	0.254564	0.523051				50.157	5.561	0.752462	0.871799				5.119	82.304	0.0767959	12.9028
			13.599	21.307	0.241777	2.11854				9.951	3.07	0.176919	0.305247					46.724	5.046	0.598302	0.644365				19.641	3.433	0.251503	0.438388				48.058	5.374	0.720972	0.842483				0.739	0.953	0.0110866	0.149402
			28.275	3.451	0.502702	0.34313				8.747	3.14	0.155513	0.312207					53.233	5.224	0.681649	0.667095				28.977	4.909	0.371051	0.62687				37	5.304	0.555079	0.831509				4.526	58.355	0.0678997	9.14832
			17.516	118.142	0.311418	11.7467				6.597	3.032	0.117288	0.301469					21.703	11.361	0.277907	1.45078				41.866	4.514	0.536095	0.576429				44.148	5.089	0.662314	0.797803				4.794	85.705	0.0719202	13.436
			29.072	29.725	0.516872	2.95553				5.176	2.682	0.0920243	0.266669					61.605	6.005	0.788853	0.766827				6.051	5.41	0.0774832	0.690847				44.484	6.253	0.667355	0.980284				3.451	23.606	0.0517724	3.70072
			27.824	7.279	0.494684	0.723744				7.633	2.59	0.135707	0.257521					90.32	7.114	1.15655	0.908444				9.196	77.665	0.117755	9.91767				26.828	5.123	0.402477	0.803133				0.615	1.162	0.00922631	0.182167
			14.13	3.16	0.251218	0.314196				9.495	2.045	0.168812	0.203332					81.851	7.877	1.0481	1.00588				7.499	46.499	0.0960248	5.93783				18.659	0.069	0.279925	0.0108171				4.165	40.77	0.0624839	6.39152
			17.207	26.967	0.305924	2.6813				9.597	2.262	0.170625	0.224909					41.325	8.079	0.529167	1.03167				31.23	2.958	0.399901	0.377731				16.084	0.042	0.241294	0.00658434				3.451	14.587	0.0517724	2.28681
			32.888	3.8	0.584717	0.37783				5.506	8.377	0.0978914	0.832917					11.93	6.835	0.152764	0.872817				32.858	6.441	0.420747	0.822504				23.069	0.141	0.346084	0.0221046				1.511	0.785	0.0226682	0.123065
			41.144	2.663	0.731501	0.26478				8.392	2.816	0.149202	0.279992					16.833	10.96	0.215547	1.39957				43.031	6.044	0.551013	0.771807				14.874	0.044	0.223142	0.00689788				2.814	2.36	0.042216	0.369977
			36.2	8.603	0.643601	0.855388				2.586	42.913	0.0459766	4.2668					70.872	7.011	0.907517	0.895291				37.292	4.93	0.477525	0.629552				17.871	0.016	0.268103	0.00250832				3.117	40.411	0.0467616	6.33524
			18.505	112.322	0.329001	11.1681				6.295	3.853	0.111919	0.3831					64.205	6.864	0.822146	0.87652				29.314	5.185	0.375366	0.662115				8.253	0.03	0.123813	0.0047031				1.271	2.674	0.0190677	0.419203
			35.883	8.164	0.637965	0.811739				10.959	2.209	0.19484	0.219639					58.365	5.273	0.747365	0.673352				12.563	27.233	0.160869	3.4776				14.027	0.138	0.210435	0.0216343				3.854	46.784	0.0578182	7.33433
			21.847	5.297	0.388419	0.526676				6.198	2.274	0.110194	0.226102					29.376	8.556	0.37616	1.09259				65.144	6.522	0.83417	0.832847				12.262	0.044	0.183956	0.00689788
			42.07	4.173	0.747964	0.414918				8.106	2.668	0.144117	0.265277					40.639	9.546	0.520383	1.21901				9.973	64.043	0.127704	8.17817				12.065	0.041	0.181001	0.00642757
			15.692	13.585	0.278989	1.35074				9.585	2.738	0.170412	0.272237					70.906	5.807	0.907952	0.741543				30.047	6.994	0.384752	0.893121				15.681	0.026	0.235248	0.00407602
			46.312	3.128	0.823383	0.311014				7.846	2.208	0.139494	0.219539					60.139	7.032	0.770081	0.897973				35.519	4.383	0.454821	0.559701				13.251	0.044	0.198793	0.00689788
			24.842	1.931	0.441667	0.191998				6.67	4.283	0.118586	0.425855					66.248	5.842	0.848307	0.746012				43.678	4.622	0.559297	0.590221				7.381	0.043	0.110731	0.00674111
			20.687	6.75	0.367795	0.671146				7.472	2.032	0.132845	0.20204					79.564	8.419	1.01882	1.07509				56.219	5.903	0.719885	0.753802				15.958	0.132	0.239404	0.0206937
			22.089	26.32	0.392721	2.61697				9.504	2.799	0.168972	0.278302					64.547	6.519	0.826525	0.832464				22.477	3.53	0.287818	0.450774				16.114	0.041	0.241744	0.00642757
			37.581	7.673	0.668154	0.762919				1.757	19.426	0.0312378	1.93151					66.978	6.526	0.857654	0.833358				10.305	5.261	0.131956	0.67182				8.042	0.024	0.120647	0.00376248
			33.054	4.201	0.587668	0.417702				1.796	20.456	0.0319311	2.03392					23.894	6.691	0.305963	0.854428				35.964	6.134	0.46052	0.7833				9.697	0.017	0.145476	0.00266509
			62.42	7.467	1.10977	0.742437				8.634	2.124	0.153504	0.211187					74.719	7.568	0.956778	0.966419				44.594	6.326	0.571027	0.807818				6.932	0.026	0.103995	0.00407602
			34.575	10.529	0.61471	1.04689				8.322	2.556	0.147957	0.254141					58.781	5.876	0.752692	0.750354				43.784	5.456	0.560655	0.696721				8.44	0.053	0.126618	0.00830882
			59.918	3.942	1.06528	0.391949				8.761	2.023	0.155762	0.201145					118.9	8.71	1.52252	1.11225				8.482	5.814	0.108612	0.742437				11.217	0.035	0.168279	0.00548695
			38.544	33.641	0.685275	3.34489				8.276	2.033	0.147139	0.202139					92.362	8.118	1.1827	1.03665				7.189	37.933	0.0920553	4.84397				10.237	0.065	0.153577	0.0101901
			30.819	6.144	0.547932	0.610892				5.749	2.662	0.102212	0.26468					77.143	7.067	0.987817	0.902443				6.159	13.576	0.0788661	1.73363				14.724	0.08	0.220891	0.0125416
			49.352	3.737	0.877431	0.371566				9.734	2.251	0.173061	0.223815					13.908	7.74	0.178092	0.988383				37.851	5.868	0.484683	0.749333				7.127	0.01	0.10692	0.0015677
			16.425	85.193	0.292021	8.47066				6.761	2.891	0.120204	0.287449					19.937	5.981	0.255294	0.763762				25.291	4.197	0.323852	0.535949				11.695	0.014	0.17545	0.00219478
			33.418	63.022	0.59414	6.26622				5.349	2.357	0.0951	0.234354					160.65	11.766	2.05713	1.5025				36.034	6.461	0.461416	0.825058				8.498	0.029	0.127488	0.00454633
			32.422	92.222	0.576432	9.16955				1.378	45.739	0.0244995	4.54779					15.407	7.853	0.197287	1.00281				42.221	6.604	0.540641	0.843318				10.207	0.073	0.153127	0.0114442
			90.87	7.23	1.61558	0.718872				8.478	2.43	0.150731	0.241613					147.75	9.505	1.89194	1.21377				27.224	5.654	0.348604	0.722005				8.029	0.011	0.120452	0.00172447
			49.424	9.434	0.878711	0.938014				5.992	2.046	0.106532	0.203432					21.878	7.265	0.280148	0.927727				36.477	6.717	0.467089	0.857748				13.233	0.158	0.198523	0.0247697
			24.433	72.59	0.434395	7.21756				6.34	4.019	0.112719	0.399605					196.894	12.198	2.52123	1.55766				39.606	4.001	0.507155	0.51092				12.957	0.067	0.194383	0.0105036
			17.254	85.523	0.306759	8.50347				8.588	2.144	0.152686	0.213176					171.496	11.064	2.19601	1.41285				35.028	6.602	0.448534	0.843063				8.05	0.016	0.120767	0.00250832
			17.579	16.768	0.312538	1.66723				8.394	17.449	0.149237	1.73494					221.925	12.449	2.84175	1.58971				5.959	60.81	0.0763051	7.76532				6.9	0.028	0.103515	0.00438956
			14.03	21.949	0.24944	2.18237				10.349	1.929	0.183995	0.191799					181.173	11.526	2.31992	1.47185				42.789	5.957	0.547914	0.760698				5.251	0.007	0.0787762	0.00109739
			13.999	64.656	0.248889	6.42869				7.287	1.858	0.129556	0.184739					121.861	9.226	1.56043	1.17814				48.551	5.082	0.621696	0.648962				9.041	0.054	0.135634	0.00846559
			12.673	20.231	0.225314	2.01155				2.365	77.452	0.0420474	7.70098					162.253	10.466	2.07765	1.33649				33.895	6.635	0.434026	0.847277				8.804	0.029	0.132079	0.00454633
			14.978	52.857	0.266294	5.25552				6.017	1.974	0.106976	0.196273					200.354	12.717	2.56554	1.62394				34.135	6.322	0.437099	0.807307				6.972	0.011	0.104595	0.00172447
			16.841	54.624	0.299417	5.43121				7.55	1.824	0.134232	0.181359					124.496	11.35	1.59417	1.44937				5.175	23.582	0.066266	3.01138				5.435	0.013	0.0815366	0.00203801
			17.306	147.553	0.307684	14.6711				9.863	2.145	0.175355	0.213275					138.495	11.013	1.77343	1.40634				45.929	8.864	0.588122	1.13192				4.417	0.006	0.0662644	0.000940621
			18.352	42.685	0.326281	4.24413				10.572	2.176	0.18796	0.216358					173.94	12.442	2.2273	1.58882				50.607	6.377	0.648023	0.814331				6.036	0.03	0.0905529	0.0047031
			30.018	101.609	0.533691	10.1029				2.907	123.555	0.0516836	12.285					135.462	5.8	1.73459	0.740649				7.194	49.661	0.0921193	6.34162				6.412	0.013	0.0961937	0.00203801
			26.463	86.625	0.470487	8.61304				2.02	95.379	0.0359136	9.48345					120.328	9.544	1.5408	1.21875				41.2	6.812	0.527567	0.86988				8.498	0.085	0.127488	0.0133255
			17.475	42.415	0.310689	4.21728				1.902	39.553	0.0338157	3.93272					158.899	9.907	2.0347	1.26511				71.98	6.614	0.921705	0.844595				5.377	0.006	0.0806665	0.000940621
			15.967	37.796	0.283878	3.75802				2.249	42.016	0.039985	4.17761					191.445	12.347	2.45146	1.57669				29.849	6.917	0.382217	0.883288				6.275	0.029	0.0941384	0.00454633
			11.778	26.151	0.209401	2.60017				2.489	46.224	0.044252	4.59601					168.207	12.345	2.15389	1.57643				87.122	7.29	1.1156	0.930919				5.263	0.097	0.0789562	0.0152067
			84.659	5.254	1.50516	0.5224				5.931	2.109	0.105447	0.209696					185.89	12.326	2.38032	1.57401				11.4	13.647	0.145977	1.7427				5.227	0.022	0.0784161	0.00344894
			54.345	5.867	0.966202	0.58335												172.657	8.809	2.21088	1.12489				44.411	4.768	0.568684	0.608865				2.49	0.005	0.0373553	0.000783851
			67.155	6.61	1.19395	0.657226												154.872	10.021	1.98314	1.27966				57.671	7.149	0.738478	0.912914				2.833	0.005	0.042501	0.000783851
			37.911	4.998	0.674021	0.496946												124.286	9.165	1.59148	1.17035				43.843	5.193	0.56141	0.663136				4.333	0.023	0.0650042	0.00360571
			16.464	33.949	0.292714	3.37552												121.529	8.785	1.55618	1.12183				46.812	5.593	0.599428	0.714216				5.971	0.032	0.0895777	0.00501664
			25.306	121.823	0.449916	12.1127												143.578	11.204	1.83852	1.43073				58.838	6.549	0.753422	0.836295				5.407	0.015	0.0811165	0.00235155
			25.785	125.426	0.458432	12.471												110.239	9.26	1.41161	1.18248				38.326	4.732	0.490765	0.604267				2.595	0.009	0.0389305	0.00141093
			19.6	12.409	0.348469	1.23382												101.088	8.438	1.29443	1.07752				36.912	6.138	0.472659	0.783811				3.415	0.023	0.0512323	0.00360571
			18.995	46.246	0.337713	4.5982												88.927	10.196	1.13871	1.30201				9.014	52.266	0.115424	6.67427				2.061	0.01	0.0309194	0.0015677
			32.498	5.073	0.577783	0.504404												47.568	11.775	0.609109	1.50365				42.984	4.743	0.550411	0.605672				4.098	0.021	0.0614787	0.00329217
			25.963	10.243	0.461597	1.01845												139.479	9.637	1.78603	1.23063				9.174	25.205	0.117473	3.21863				10.437	0.097	0.156577	0.0152067
			21.846	18.62	0.388401	1.85137												120.347	9.708	1.54105	1.23969				9.175	28.005	0.117486	3.57619				5.137	0.028	0.077066	0.00438956
			62.486	7.846	1.11094	0.78012												128.817	7.154	1.6495	0.913552				63.278	5.734	0.810276	0.732221				2.958	0.015	0.0443763	0.00235155
			31.904	12.171	0.567222	1.21015												100.404	9.743	1.28567	1.24416				22.64	5.348	0.289906	0.68293				8.93	0.059	0.133969	0.00924944
			41.72	7.459	0.741741	0.741641												189.001	15.008	2.42016	1.91649				61.838	7.48	0.791837	0.955182				10.542	0.124	0.158152	0.0194395
			51.484	5.422	0.915336	0.539104												78.295	7.611	1.00257	0.97191				42.974	6.252	0.550283	0.798369				2.216	0.009	0.0332447	0.00141093
			147.764	6.23	2.6271	0.619443												150.603	10.725	1.92847	1.36956				28.855	6.97	0.369489	0.890056				12.635	0.171	0.189552	0.0268077
			107.105	5.709	1.90422	0.567641												90.898	7.3	1.16395	0.932196				2.166	1.375	0.0277357	0.175585				7.027	0.051	0.10542	0.00799528
			52.492	144.747	0.933257	14.3921												158.836	7.309	2.0339	0.933346				47.717	6.001	0.611017	0.766316				5.373	0.019	0.0806065	0.00297863
			124.922	6.202	2.22099	0.616659												111.124	6.365	1.42294	0.812798				90.416	7.611	1.15778	0.97191				1.607	0.005	0.0241084	0.000783851
			59.439	66.836	1.05677	6.64544												106.965	9.832	1.36969	1.25553				11.028	61.008	0.141214	7.79061				4.646	0.018	0.0696999	0.00282186
			109.158	6.168	1.94072	0.613279												95.44	9.332	1.22211	1.19168				29.06	6.02	0.372114	0.768743				1.831	0.018	0.0274689	0.00282186
			42.048	4.242	0.747573	0.421778												104.167	10.874	1.33386	1.38859				78.531	7.414	1.00559	0.946754				9.073	0.118	0.136114	0.0184989
			103.943	5.751	1.84801	0.571817												113.6	8.484	1.45465	1.08339				29.984	6.59	0.383946	0.841531				1.634	0.012	0.0245135	0.00188124
			40.721	127.014	0.72398	12.6289												119.031	9.782	1.52419	1.24914				25.459	5.984	0.326003	0.764146				2.247	0.01	0.0337098	0.0015677
			125.97	6.315	2.23962	0.627895												71.881	7.647	0.920437	0.976507				10.687	46.138	0.136847	5.89174				2.059	0.008	0.0308894	0.00125416
			36.604	4.167	0.650784	0.414321												99.212	6.899	1.27041	0.880989				78.462	9.066	1.00471	1.15771				3.605	0.008	0.0540827	0.00125416
			31.642	3.566	0.562564	0.354564												91.831	8.622	1.1759	1.10101				15.109	5.301	0.193471	0.676928				6.955	0.21	0.10434	0.0329217
			52.998	4.12	0.942253	0.409648												70.597	7.053	0.903996	0.900655				15.235	4.762	0.195084	0.608098				2.483	0.011	0.0372503	0.00172447
			30.652	4.063	0.544963	0.40398												87.379	9.451	1.11889	1.20687				32.913	6.816	0.421451	0.87039				6.373	0.054	0.0956086	0.00846559
			36.777	3.641	0.653859	0.362021												139.356	9.988	1.78446	1.27545				24.15	5.977	0.309241	0.763252				1.675	0.008	0.0251286	0.00125416
			27.894	3.616	0.495928	0.359536												81.903	7.359	1.04877	0.93973				5.888	35.284	0.0753959	4.5057				3.748	0.011	0.056228	0.00172447
			43.681	3.528	0.776606	0.350786												128.25	10.246	1.64224	1.30839				75.141	7.682	0.962182	0.980977				4.244	0.01	0.0636691	0.0015677
			32.749	3.29	0.582246	0.327122												76.245	7.585	0.976318	0.96859				11.339	58.575	0.145196	7.47992				5.545	0.055	0.0831868	0.00862236
			45.641	3.825	0.811453	0.380316												139.677	12.351	1.78857	1.5772				30.017	5.77	0.384368	0.736818				1.138	0.012	0.0170724	0.00188124
			53.344	3.45	0.948405	0.34303												63.358	6.931	0.8113	0.885076				14.405	45.31	0.184456	5.786				6.584	0.075	0.098774	0.0117578
			36.293	4.118	0.645254	0.409449												65.691	6.553	0.841174	0.836806				3.968	3.255	0.0508103	0.415657				2.113	0.014	0.0316995	0.00219478
			37.062	3.813	0.658927	0.379123												63.412	5.523	0.811992	0.705277				60.09	6.281	0.769453	0.802072				8.726	0.086	0.130909	0.0134822
			42.933	4.086	0.763307	0.406267												93.19	7.784	1.1933	0.994002				13.618	38.566	0.174379	4.92481				8.391	0.12	0.125883	0.0188124
			33.028	3.324	0.587206	0.330502												168.767	9.603	2.16106	1.22628				89.211	8.171	1.14235	1.04342				1.501	0.025	0.0225182	0.00391925
			36.841	3.532	0.654997	0.351183												79.688	13.047	1.02041	1.66608				6.844	36.339	0.0876375	4.64042				4.34	0.018	0.0651093	0.00282186
			44.751	3.493	0.795629	0.347306												69.227	7.274	0.886453	0.928876				26.312	3.685	0.336926	0.470568				5.615	0.047	0.084237	0.0073682
			42.24	3.745	0.750986	0.372362												90.264	8.246	1.15583	1.053				63.217	6.164	0.809495	0.787131				1.675	0.024	0.0251286	0.00376248
			28.82	31.941	0.512392	3.17586												129.095	8.024	1.65306	1.02465				7.244	58.714	0.0927595	7.49767				4.578	0.068	0.0686798	0.0106604
			15.136	52.662	0.269103	5.23613												71.982	8.247	0.921731	1.05313				25.773	2.655	0.330024	0.339038				1.112	0.007	0.0166824	0.00109739
			19.06	44.708	0.338868	4.44527												86.398	7.899	1.10633	1.00869				11.667	5.753	0.149396	0.734647				4.675	0.046	0.070135	0.00721143
			25.409	4.108	0.451747	0.408455												110.202	9.901	1.41114	1.26434				2.67	7.879	0.0341894	1.00613				1.782	0.02	0.0267338	0.0031354
			12.635	3.656	0.224638	0.363513												43.986	6.58	0.563241	0.840254				29.231	2.652	0.374303	0.338655				3.188	0.024	0.0478268	0.00376248
			23.406	2.902	0.416136	0.288543												118.368	8.832	1.5157	1.12783				5.381	43.592	0.0689038	5.56662				1.704	0.017	0.0255636	0.00266509
			56.281	4.061	1.00062	0.403781												70.15	7.879	0.898272	1.00613				4.734	1.167	0.0606189	0.149024				1.059	0.023	0.0158873	0.00360571
			44.751	3.767	0.795629	0.374549												39.145	7.145	0.501252	0.912403				3.889	30.275	0.0497987	3.86606				1.411	0.004	0.021168	0.00062708
			40.762	3.877	0.724709	0.385487												157.185	13.257	2.01276	1.69289				27.185	2.249	0.348104	0.287193				0.882	0.02	0.0132319	0.0031354
			42.055	3.855	0.747697	0.383299												51.292	4.821	0.656795	0.615633				19.844	2.27	0.254103	0.289875				10.263	0.172	0.153967	0.0269645
			38.106	3.131	0.677488	0.311312												87.299	8.133	1.11787	1.03857				21.963	2.463	0.281237	0.31452				1.159	0	0.0173875	0
			45.826	3.897	0.814742	0.387475												152.717	10.623	1.95554	1.35654				13.145	5.606	0.168322	0.715876				1	0.02	0.0150021	0.0031354
			35.591	4.091	0.632774	0.406764												79.066	6.055	1.01244	0.773212				2.202	0.76	0.0281966	0.0970506				1.855	0.015	0.027829	0.00235155
			67.334	3.798	1.19713	0.377632												69.388	6.744	0.888514	0.861196				26.801	2.22	0.343187	0.28349				2.538	0.014	0.0380754	0.00219478
			56.485	3.816	1.00425	0.379421												109.102	10.567	1.39705	1.34939				4.83	0.598	0.0618482	0.0763635				1.754	0.015	0.0263137	0.00235155
			35.407	4.044	0.629502	0.402091												90.641	7.254	1.16066	0.926322				10.875	64.495	0.139255	8.23589				0.768	0.008	0.0115216	0.00125416
			25.435	8.01	0.45221	0.796427												70.974	7.775	0.908823	0.992853				17.385	2.421	0.222615	0.309157				1.041	0.008	0.0156172	0.00125416
			36.033	11.819	0.640632	1.17515												57.763	6.927	0.739656	0.884565				20.044	70.084	0.256664	8.94959				1.221	0.022	0.0183176	0.00344894
			35.071	11.39	0.623528	1.1325												73.892	5.276	0.946188	0.673735				9.673	4.132	0.123863	0.527649				2.5	0.021	0.0375053	0.00329217
			72.719	3.996	1.29287	0.397319												51.456	6.22	0.658895	0.794282				20.917	2.644	0.267843	0.337634				1.075	0.02	0.0161273	0.0031354
			46.913	4.145	0.834068	0.412134												84.665	8.71	1.08414	1.11225				28.393	2.267	0.363573	0.289492				1.516	0.02	0.0227432	0.0031354
			45.278	5.213	0.804999	0.518324												84.426	8.486	1.08108	1.08365				9.095	68.378	0.116462	8.73174				1.107	0.011	0.0166074	0.00172447
			58.228	3.627	1.03524	0.360629												71.47	5.611	0.915174	0.716514				7.63	45.996	0.0977023	5.8736				0.951	0.016	0.014267	0.00250832
			54.773	3.505	0.973811	0.348499												94.446	8.835	1.20938	1.12821				20.089	2.685	0.25724	0.342869				1.302	0.013	0.0195328	0.00203801
			35.303	6.139	0.627653	0.610395												65.517	7.388	0.838946	0.943434				26.563	3.289	0.34014	0.419999				2.007	0.034	0.0301093	0.00533018
			80.375	4.15	1.42899	0.412631												63.663	6.682	0.815206	0.853279				12.928	84.197	0.165543	10.7518				1.096	0.008	0.0164423	0.00125416
			43.651	3.602	0.776073	0.358144												122.343	7.885	1.5666	1.0069				5.222	21.19	0.0668678	2.70592				1.166	0.01	0.0174925	0.0015677
			36.739	6.36	0.653184	0.632369												155.409	8.331	1.99001	1.06385				19.961	2.958	0.255601	0.377731				2.966	0.043	0.0444963	0.00674111
			43.122	4.225	0.766667	0.420088												120.866	8.497	1.54769	1.08505				13.1	90.464	0.167746	11.5521				1.805	0.037	0.0270788	0.00580049
			45.88	5.002	0.815702	0.497344												83.354	8.217	1.06735	1.0493				32.95	2.601	0.421925	0.332143				2.539	0.022	0.0380904	0.00344894
			41.532	3.355	0.738399	0.333585												129.099	9.107	1.65311	1.16295				20.944	2.965	0.268188	0.378625				1.153	0.024	0.0172975	0.00376248
			42.506	3.427	0.755716	0.340743												97.741	10.193	1.25158	1.30163				68.831	8.012	0.881382	1.02312				1.027	0.007	0.0154072	0.00109739
			45.595	3.507	0.810635	0.348698												49.215	6.018	0.630199	0.768487				7.547	38.05	0.0966395	4.85891				1.041	0.008	0.0156172	0.00125416
			48.861	3.821	0.868701	0.379918												91.35	8.041	1.16974	1.02682				89.356	8.967	1.14421	1.14507
			45.319	4.494	0.805728	0.446834												73.152	8.422	0.936713	1.07547				60.391	7.291	0.773308	0.931047
			25.968	3.349	0.461686	0.332988												104.253	8.44	1.33496	1.07777				4.424	23.602	0.0566494	3.01393
			24.054	2.831	0.427657	0.281484												51.543	6.044	0.660009	0.771807				5.238	18.524	0.0670727	2.36548
			27.33	3.249	0.485901	0.323045												122.943	8.903	1.57429	1.1369				6.074	24.304	0.0777777	3.10357
			28.103	3.268	0.499644	0.324934												64.957	4.433	0.831775	0.566086				4.241	2.421	0.0543061	0.309157
			25.532	3.077	0.453934	0.305943												55.095	7.634	0.705492	0.974847				114.24	7.397	1.46285	0.944583
			26.76	2.375	0.475767	0.236144												138.891	4.04	1.7785	0.5159				3.895	34.833	0.0498755	4.44811
			28.978	2.784	0.515201	0.276811												85.668	7.334	1.09698	0.936538				72.203	7.984	0.924561	1.01954
			32.626	2.994	0.580059	0.297691												114.815	8.759	1.47021	1.11851				4.36	1.506	0.0558299	0.192313
			19.564	2.529	0.347829	0.251456												87.69	8.162	1.12287	1.04227				74.891	8.079	0.95898	1.03167
			33.313	2.926	0.592273	0.290929												62.037	7.666	0.794385	0.978934				50.602	6.241	0.647959	0.796964
			26.385	3.165	0.4691	0.314693												174.325	11.878	2.23223	1.5168				9.261	51.704	0.118587	6.6025
			33.72	3.202	0.599509	0.318372												66.481	7.945	0.85129	1.01456				5.496	51.135	0.0703764	6.52984
			27.474	3.079	0.488461	0.306142												121.585	7.769	1.5569	0.992087				3.811	57.512	0.0487999	7.34417
			37.956	2.874	0.674821	0.285759												140.775	10.597	1.80263	1.35322				59.147	8.024	0.757378	1.02465
			27.141	3.368	0.482541	0.334877												43.397	6.222	0.555699	0.794538				3.549	34.822	0.045445	4.4467
			35.079	2.694	0.623671	0.267862												59.718	6.464	0.76469	0.825441				8.279	64.728	0.106013	8.26564
			38.285	4.034	0.68067	0.401097												58.833	6.206	0.753358	0.792494				7.996	71.419	0.102389	9.12007
			29.281	2.965	0.520588	0.294807												70.201	5.208	0.898925	0.665052				72.276	9.527	0.925495	1.21658
			30.234	3.307	0.537531	0.328812												68.311	7.482	0.874723	0.955437				3.149	16.02	0.040323	2.04572
			20.459	2.394	0.363741	0.238033												133.783	7.48	1.71309	0.955182				2.952	12.67	0.0378004	1.61794
			29.354	3.603	0.521886	0.358243												49.429	5.806	0.632939	0.741415				48.173	7.017	0.616856	0.896058
			33.828	3.058	0.601429	0.304054												51.409	4.785	0.658293	0.611035				17.928	94.778	0.229568	12.103
			24.976	3.429	0.444049	0.340942												115.464	7.493	1.47852	0.956842				5.047	41.861	0.0646269	5.34557
			24.894	3.572	0.442591	0.355161												138.835	9.737	1.77778	1.2434				7.197	39.995	0.0921577	5.10729
			32.798	3.227	0.583117	0.320858												68.506	6.202	0.87722	0.791984				2.804	0.874	0.0359053	0.111608
			19.687	3.524	0.350016	0.350388												71.611	6.563	0.91698	0.838083				6.817	59.176	0.0872918	7.55666
			28.588	2.916	0.508267	0.289935												59.432	6.563	0.761028	0.838083				5.175	5.176	0.066266	0.660965
			34.674	3.176	0.61647	0.315787												77.765	8.611	0.995782	1.09961				3.106	35.24	0.0397724	4.50008
			40.934	2.97	0.727767	0.295304												158.911	8.445	2.03486	1.07841				6.177	74.603	0.0790966	9.52666
			25.539	3.476	0.454059	0.345615												73.02	5.629	0.935022	0.718813				64.809	8.852	0.82988	1.13038
			29.857	3.075	0.530829	0.305744												172.968	9.103	2.21486	1.16244				4.162	2.207	0.0532945	0.28183
			31.555	3.386	0.561017	0.336667												65.902	4.132	0.843876	0.527649				107.938	10.465	1.38215	1.33636
			35.164	3.646	0.625182	0.362518												39.993	5.152	0.512111	0.657901				2.554	1.606	0.032704	0.205083
			42.616	3.675	0.757671	0.365402												81.665	8.813	1.04572	1.1254				33.059	5.817	0.423321	0.74282
			27.216	3.079	0.483874	0.306142												77.877	8.428	0.997216	1.07624				2.591	6.439	0.0331778	0.822248
			35.961	2.934	0.639352	0.291725												54.538	6.465	0.69836	0.825568				52.032	7.908	0.666271	1.00984
			30.471	3.169	0.541745	0.315091												53.31	6.132	0.682635	0.783045				2.451	0.607	0.0313851	0.0775128
			27.321	3.5	0.485741	0.348002												73.415	7.281	0.94008	0.92977				3.486	32.643	0.0446383	4.16845
			28.826	3.869	0.512498	0.384691												72.533	7.271	0.928786	0.928493				80.017	11.218	1.02462	1.43252
			31.562	3.494	0.561142	0.347405												54.609	7.229	0.699269	0.92313				49.889	7.852	0.638829	1.00269
			34.29	3.27	0.609643	0.325133												73.14	6.536	0.936559	0.834635				73.877	8.778	0.945996	1.12093
			33.663	3.616	0.598496	0.359536												68.827	7.206	0.881331	0.920193				57.955	8.194	0.742115	1.04636
			35.406	3.39	0.629484	0.337065												45.042	6.064	0.576764	0.774361				7.898	16.212	0.101134	2.07024
			42.909	3.336	0.762881	0.331695												82.614	8.195	1.05787	1.04649				80.359	10.511	1.029	1.34223
			15.754	2.714	0.280091	0.26985												68.862	7.808	0.881779	0.997067				32.667	6.953	0.418301	0.887885
			27.573	2.543	0.490221	0.252848												177.277	10.523	2.27003	1.34377				32.306	5.2	0.413679	0.66403
			31.324	3.182	0.55691	0.316383												64.408	7.262	0.824745	0.927344				56.143	7.522	0.718912	0.960545
			35.63	2.991	0.633467	0.297392												147.484	6.22	1.88853	0.794282				5.094	43.312	0.0652288	5.53086
			40.332	3.417	0.717064	0.339749												109.654	10.468	1.40412	1.33674				76.839	8.416	0.983925	1.07471
			26.105	3.391	0.464122	0.337164												54.849	5.455	0.702342	0.696593				90.471	11.129	1.15848	1.42115
			39.158	4.288	0.696191	0.426352												50.631	7.341	0.648331	0.937432				49.949	5.459	0.639598	0.697104
			33.187	3.771	0.590033	0.374947												68.71	5.121	0.879833	0.653942				44.255	6.822	0.566686	0.871157
			32.598	3.822	0.579561	0.380018												11.75	4.144	0.150459	0.529181				56.771	7.576	0.726954	0.967441
			34.726	3.004	0.617395	0.298685												81.54	8.03	1.04412	1.02542				60.667	10.561	0.776842	1.34862
			30.714	3.814	0.546065	0.379222												67.183	3.249	0.860279	0.414891				53.287	9.186	0.682341	1.17303
			30.748	2.739	0.54667	0.272336												19.468	9.875	0.249288	1.26102				86.776	8.833	1.11117	1.12796
			30.43	3.383	0.541016	0.336369												65.951	5.251	0.844504	0.670543				53.814	4.992	0.689089	0.637469
			32.116	3.224	0.570991	0.320559												57.92	7.125	0.741667	0.909849				54.143	7.854	0.693302	1.00294
			32.297	3.508	0.574209	0.348797												25.27	11.051	0.323583	1.41119				61.979	9.28	0.793642	1.18504
			38.78	3.31	0.689471	0.32911												90.995	8.02	1.16519	1.02414				54.98	9.315	0.70402	1.18951
			34.422	3.534	0.61199	0.351382												153.283	12.312	1.96279	1.57222				32.55	4.888	0.416803	0.624188
			34.478	3.651	0.612985	0.363016												124.826	7.432	1.5984	0.949052				30.4	5.763	0.389272	0.735924
			42.819	3.627	0.76128	0.360629												59.991	6.595	0.768186	0.842169				54.784	8.081	0.70151	1.03193
			32.466	3.758	0.577214	0.373654												93.452	8.435	1.19665	1.07713				52.306	6.868	0.669779	0.877031
			31.984	3.606	0.568645	0.358541												120.262	5.995	1.53996	0.76555				19.714	1.158	0.252438	0.147874
			26.961	2.666	0.479341	0.265078												165.48	10.551	2.11897	1.34734				12.64	71.185	0.161855	9.09019
			26.055	3.375	0.463233	0.335573												70.495	7.986	0.90269	1.0198				14.01	58.334	0.179398	7.44914
			26.715	3.144	0.474967	0.312605												74.537	7.597	0.954447	0.970123				6.233	21.493	0.0798137	2.74462
			27.892	2.883	0.495893	0.286654												151.046	9.515	1.93415	1.21505				56.228	1.434	0.72	0.183119
			29.212	3.044	0.519361	0.302662												72.867	6.365	0.933063	0.812798				12.608	28.752	0.161446	3.67158
			29.03	4.05	0.516125	0.402688												98.886	9.212	1.26624	1.17636				11.869	65.531	0.151983	8.36819
			40.274	3.738	0.716033	0.371666												64.688	6.983	0.828331	0.891716				17.74	0.703	0.227161	0.0897718
			28.816	3.102	0.512321	0.308429												113.349	7.778	1.45144	0.993236				20.982	0.962	0.268675	0.122846
			29.397	2.737	0.52265	0.272137												123.669	10.47	1.58358	1.337				12.982	39.873	0.166235	5.09171
			46.186	3.659	0.821142	0.363811												84.169	8.59	1.07779	1.09693				18.004	1.083	0.230542	0.138297
			30.699	3.005	0.545799	0.298784												147.116	10.713	1.88382	1.36803				15.233	46.675	0.195059	5.96031
			34.267	3.723	0.609234	0.370174												42.947	13.626	0.549937	1.74001				62.31	1.63	0.797881	0.208148
			27.492	3.25	0.488781	0.323144												95.429	8.991	1.22197	1.14813				8.039	23.747	0.10294	3.03245
			37.793	3.346	0.671923	0.33269												184.449	6.746	2.36187	0.861451				14.909	53.596	0.19091	6.84411
			42.174	3.567	0.749813	0.354663												96.721	8.548	1.23851	1.09156				4.234	25.842	0.0542164	3.29997
			42.699	3.423	0.759147	0.340346												141.679	11.715	1.8142	1.49598				18.337	53.199	0.234806	6.79341
			24.042	2.645	0.427444	0.26299												79.918	7.881	1.02335	1.00639				17.916	37.619	0.229415	4.80388
			51.346	3.528	0.912882	0.350786												122.567	8.916	1.56947	1.13856				41.15	2.263	0.526926	0.288981
			33.278	32.743	0.591651	3.25561												98.93	16.019	1.2668	2.0456				60.016	1.773	0.768506	0.226409
			36.906	3.923	0.656153	0.39006												73.373	7.238	0.939542	0.924279				13.199	52.56	0.169013	6.71181
			35.176	3.943	0.625395	0.392049												139.273	9.683	1.78339	1.2365				5.54	49.718	0.0709398	6.34889
			41.062	4.933	0.730043	0.490484												128.436	9.83	1.64463	1.25527				9.298	34.974	0.119061	4.46611
			38.133	2.856	0.677968	0.283969												163.675	9.958	2.09586	1.27162				6.415	15.281	0.0821442	1.95135
			49.015	3.526	0.871439	0.350587												158.077	11.083	2.02418	1.41528				51.266	1.947	0.656462	0.248628
			43.798	3.766	0.778686	0.37445												104.976	16.195	1.34422	2.06807				13.798	36.13	0.176684	4.61373
			32.825	3.816	0.583597	0.379421												166.595	10.464	2.13325	1.33623				3.073	21.933	0.0393498	2.8008
			32.496	5.187	0.577747	0.515739												71.884	11.128	0.920476	1.42102				21.527	61.245	0.275654	7.82087
			45.362	3.52	0.806492	0.34999												66.394	10.021	0.850176	1.27966				18.457	37.844	0.236342	4.83261
			39.574	3.724	0.703587	0.370274												78.983	8.173	1.01138	1.04368				18.237	24.819	0.233525	3.16934
			53.593	3.445	0.952832	0.342533												61.312	12.917	0.785101	1.64948				20.903	49.26	0.267663	6.29041
			30.312	3.176	0.538918	0.315787												48.092	9.573	0.615819	1.22245				5.019	1.076	0.0642684	0.137403
			33.46	3.139	0.594886	0.312108												76.19	9.02	0.975614	1.15184				11.379	52.325	0.145708	6.6818
			39.074	3.365	0.694698	0.334579												48.163	9.558	0.616728	1.22054				17.921	66.616	0.229479	8.50674
			63.967	4.249	1.13727	0.422474												51.281	11.163	0.656654	1.42549				10.354	58.153	0.132583	7.42603
			27.499	3.193	0.488906	0.317477												66.195	11.497	0.847628	1.46815				9.141	42.622	0.117051	5.44275
			33.48	4.49	0.595242	0.446437												71.89	10.68	0.920553	1.36382				21.225	44.043	0.271786	5.62421
			52.744	4.121	0.937737	0.409747												25.807	14.869	0.330459	1.89874				14.988	65.868	0.191922	8.41122
			34.356	3.477	0.610816	0.345715												47.034	7.099	0.602271	0.906529				10.789	28.492	0.138153	3.63837
			47.814	3.227	0.850087	0.320858												70.899	9.667	0.907863	1.23446				18.407	70.97	0.235702	9.06274
			37.737	3.355	0.670927	0.333585												24.221	13.5	0.31015	1.72392				21.15	107.153	0.270826	13.6832
			41.574	3.444	0.739146	0.342434												67.486	7.672	0.864159	0.9797				22.715	56.567	0.290866	7.2235
			26.317	2.783	0.467891	0.276711												126.409	9.118	1.61867	1.16435				15.427	50.109	0.197543	6.39882
			47.091	3.42	0.837232	0.340047												6.312	3.055	0.0808253	0.390118				12.045	47.546	0.154236	6.07153
			36.02	3.34	0.640401	0.332093												26.488	16.533	0.339179	2.11123				22.379	67.706	0.286563	8.64593
			60.623	3.504	1.07782	0.348399												123.2	9.581	1.57758	1.22348				19.632	78.661	0.251388	10.0449
			37.791	3.694	0.671887	0.367291												76.033	11.419	0.973604	1.45818				19.02	60.16	0.243551	7.68232
			42.274	3.782	0.751591	0.376041												101.687	7.701	1.3021	0.983403				18.463	93.771	0.236419	11.9744
			37.593	3.731	0.668367	0.37097												97.946	7.923	1.2542	1.01175				23.401	93.941	0.29965	11.9961
			29.623	3.365	0.526668	0.334579												56.949	10.753	0.729233	1.37314				23.946	71.274	0.306629	9.10156
			34.546	2.94	0.614194	0.292321												86.309	6.1	1.10519	0.778958				20.26	90.895	0.25943	11.6071
			34.932	3.4	0.621057	0.338059												121.525	9.483	1.55613	1.21096				23.789	46.365	0.304619	5.92072
			35.981	3.001	0.639707	0.298387												92.421	7.069	1.18345	0.902698				22.768	48.871	0.291545	6.24073
			39.452	3.569	0.701418	0.354862												83.884	8.154	1.07414	1.04125				12.954	73.367	0.165876	9.36883
			36.832	3.167	0.654837	0.314892												132.894	10.835	1.70171	1.38361				29.004	113.514	0.371397	14.4955
			30.572	3.657	0.543541	0.363612												70.851	5.939	0.907248	0.758399				24.389	49.099	0.312302	6.26985
			35.044	3.704	0.623048	0.368285												82.245	7.434	1.05315	0.949308				25.012	75.962	0.320279	9.7002
			34.331	3.31	0.610372	0.32911												112.831	9.814	1.4448	1.25323				23.433	61.665	0.30006	7.8745
			35.99	3.134	0.639867	0.311611												84.44	5.797	1.08126	0.740266				24.731	72.353	0.316681	9.23934
			52.191	3.844	0.927906	0.382205												55.614	7.332	0.712138	0.936283				2.932	8.778	0.0375443	1.12093
			29.48	3.05	0.524126	0.303259												54.477	8.379	0.697579	1.06998				23.361	66.284	0.299138	8.46434
			29.636	2.945	0.526899	0.292819												156.862	11.236	2.00862	1.43482				13.111	31.686	0.167887	4.04624
			35.855	3.755	0.637467	0.373356												46.96	8.417	0.601324	1.07484				29.758	61.908	0.381052	7.90553
																		87.903	7.29	1.1256	0.930919				25.376	72.735	0.32494	9.28812
																		66.683	6.328	0.853877	0.808074				25.315	73.085	0.324159	9.33282
																		97.47	10.078	1.2481	1.28694				25.832	93.302	0.330779	11.9145
																		65.162	6.988	0.8344	0.892354				18.216	30.26	0.233256	3.86414
																		59.689	4.923	0.764319	0.628658				28.728	87.533	0.367862	11.1778
																		29.751	8.555	0.380962	1.09246				25.595	136.969	0.327744	17.4907
																		85.148	7.653	1.09032	0.977274				22.079	79.656	0.282722	10.1719
																		70.428	7.061	0.901832	0.901676				27.42	134.532	0.351114	17.1795
																		98.099	7.27	1.25616	0.928365				26.208	107.082	0.335594	13.6742
																		96.674	9.965	1.23791	1.27251				29.311	85.191	0.375328	10.8787
																		61.734	7.447	0.790505	0.950968				19.742	89.228	0.252797	11.3942
																		67.392	7.479	0.862956	0.955054				28.535	99.296	0.365391	12.6799
																		64.992	7.36	0.832224	0.939858				21.702	99.505	0.277894	12.7066
																		79.715	7.55	1.02075	0.964121				17.365	48.049	0.222359	6.13577
																		101.533	9.558	1.30013	1.22054				15.434	50.024	0.197633	6.38797
																		108.237	7.785	1.38598	0.99413				9.658	97.61	0.123671	12.4646
																		66.664	7.422	0.853634	0.947775				6.096	26.752	0.0780594	3.41618
																		85.247	7.855	1.09159	1.00307				17.198	55.791	0.220221	7.12441
																		87.353	8.39	1.11856	1.07139				20.225	91.334	0.258981	11.6632
																		85.482	8.45	1.0946	1.07905				9.018	76.4	0.115476	9.75614
																		87.241	8.711	1.11712	1.11238				5.688	1.058	0.0728349	0.135105
																		89.15	8.441	1.14157	1.0779				18.998	55.865	0.24327	7.13386
																		78.026	7.585	0.999124	0.96859				92.774	4.205	1.18797	0.536971
																		83.629	8.463	1.07087	1.08071				22.263	81.44	0.285078	10.3997
																		84.741	7.755	1.08511	0.990299				14.966	39.449	0.19164	5.03756
																		71.169	6.174	0.91132	0.788408				10.89	71.036	0.139447	9.07116
																		123.447	9.74	1.58074	1.24378				8.294	18.263	0.106205	2.33215
																		77.803	7.036	0.996269	0.898484				11.683	43.284	0.149601	5.52729
																		67.486	7.641	0.864159	0.975741				13.496	87.274	0.172816	11.1447
																		89.055	8.899	1.14035	1.13639				13.808	80.773	0.176812	10.3146
																		82.033	8.096	1.05043	1.03384				104.268	5.2	1.33515	0.66403
																		47.016	6.219	0.602041	0.794155				105.498	4.63	1.3509	0.591242
																		79.808	7.163	1.02194	0.914702				12.799	63.107	0.163891	8.05864
																		76.959	7.088	0.985461	0.905124				114.604	5.926	1.46751	0.756739
																		63.102	6.715	0.808022	0.857493				12.418	82.838	0.159013	10.5783
																		81.331	7.117	1.04144	0.908827				18.19	72.594	0.232923	9.27012
																		86.028	7.667	1.10159	0.979061				14.59	56.223	0.186825	7.17957
																		98.045	8.632	1.25547	1.10229				15.212	92.343	0.19479	11.792
																		82.225	7.559	1.05289	0.96527				15.112	76.308	0.193509	9.74439
																		65.199	6.827	0.834874	0.871795				93.541	6.553	1.19779	0.836806
																		68.208	6.153	0.873405	0.785726				12.347	62.98	0.158104	8.04243
																		109.099	9.672	1.39701	1.2351				93.483	5.856	1.19705	0.7478
																		85.443	8.196	1.0941	1.04661				19.949	45.8	0.255447	5.84857
																		83.291	7.068	1.06654	0.90257				14.823	39.887	0.189809	5.09349
																		105.999	8.686	1.35732	1.10919				5.915	22.841	0.0757417	2.91675
																		81.887	6.127	1.04856	0.782406				17.435	6.839	0.223255	0.873327
																		101.524	9.914	1.30002	1.266				23.984	87.128	0.307116	11.1261
																		144.259	9.858	1.84724	1.25885				19.45	135.905	0.249058	17.3548
																		111.551	10.823	1.42841	1.38208				16.441	77.817	0.210527	9.93708
																		76.498	8.709	0.979558	1.11212				22.804	88.997	0.292006	11.3647
																		114.92	9.787	1.47155	1.24978				19.595	96.607	0.250914	12.3365
																		124.951	9.636	1.6	1.2305				23.366	101.65	0.299202	12.9805
																		64.617	7.243	0.827422	0.924917				19.423	85.786	0.248712	10.9547
																		71.39	7.293	0.91415	0.931302				27.22	103.966	0.348553	13.2763
																		75.589	8.325	0.967918	1.06309				19.095	104.629	0.244512	13.3609
																		79.01	8.94	1.01172	1.14162				27.539	73.514	0.352637	9.3876
																		105.206	10.815	1.34716	1.38106				27.254	85.451	0.348988	10.9119
																		38.031	6.539	0.486988	0.835018				21.867	88.21	0.280007	11.2643
																		98.351	7.165	1.25939	0.914957				17.346	99.013	0.222116	12.6438
																		58.462	6.159	0.748607	0.786493				22.013	78.242	0.281877	9.99136
																		73.455	6.239	0.940592	0.796709				11.877	72.901	0.152085	9.30932
																		90.056	8.527	1.15317	1.08888				24.095	97.558	0.308537	12.458
																		114.672	8.797	1.46838	1.12336				26.346	96.625	0.337361	12.3388
																		87.956	8.038	1.12628	1.02644				24.553	80.81	0.314402	10.3193
																		38.968	10.539	0.498986	1.34581				13.722	35.047	0.17571	4.47544
																		120.212	8.723	1.53932	1.11391				20.081	91.945	0.257138	11.7412
																		80.04	8.262	1.02491	1.05504				22.971	85.137	0.294144	10.8718
																		88.455	8.313	1.13267	1.06155				22.855	110.135	0.292659	14.064
																		85.428	8.29	1.09391	1.05862				22.467	44.915	0.28769	5.73556
																		71.338	5.715	0.913484	0.729795				9.762	57.746	0.125003	7.37406
																		147.748	10.7	1.89192	1.36637				6.083	43.307	0.0778929	5.53022
																		114.363	10.258	1.46442	1.30993				4.605	46.417	0.0589671	5.92736
																		114.944	9.286	1.47186	1.1858				42.53	2.402	0.544597	0.306731
																		129.436	9.126	1.65743	1.16537				6.511	70.492	0.0833735	9.0017
																		87.751	8.978	1.12365	1.14647				6.784	40.454	0.0868692	5.1659
																		104.153	6.537	1.33368	0.834763				36.856	3.088	0.471942	0.394332
																		85.917	8.945	1.10017	1.14226				8.362	3.511	0.107076	0.448348
																		102.487	9.248	1.31235	1.18095				5.538	55.667	0.0709142	7.10857
																		86.018	7.784	1.10146	0.994002				6.638	64.511	0.0849997	8.23793
																		19.534	14.792	0.250133	1.88891				6.324	58.355	0.0809789	7.45182
																		127.596	9.66	1.63387	1.23356				6.225	50.774	0.0797112	6.48374
																		119.141	9.672	1.5256	1.2351				4.923	20.517	0.0630391	2.61998
																		142.673	6.633	1.82693	0.847022				5.364	1.914	0.0686861	0.244414
																		99.543	7.991	1.27465	1.02044				4.77	83.569	0.0610799	10.6716
																		103.316	8.393	1.32296	1.07177				2.771	25.345	0.0354827	3.23651
																		121.514	10.078	1.55599	1.28694				36.155	2.867	0.462965	0.36611
																		123.568	9.082	1.58229	1.15975				7.561	3.003	0.0968187	0.383477
																		126.612	8.862	1.62127	1.13166				37.703	4.081	0.482788	0.521136
																		119.165	9.869	1.52591	1.26025				7.641	0.697	0.0978431	0.0890056
																		101.551	8.664	1.30036	1.10638				28.171	2.834	0.36073	0.361896
																		110.963	9.689	1.42088	1.23727				63.338	4.922	0.811044	0.62853
																		108.099	9.185	1.38421	1.17291				4.637	2.952	0.0593769	0.376965
																		115.193	8.372	1.47505	1.06909				2.167	0.637	0.0277485	0.0813437
																		123.625	10.785	1.58302	1.37722				5.699	2.842	0.0729758	0.362918
																		88.8	8.989	1.13709	1.14788				3.194	1.533	0.0408992	0.195761
																		121.266	10.594	1.55281	1.35283				27.396	3.834	0.350806	0.489595
																		145.003	12.17	1.85677	1.55409				2.855	29.441	0.0365583	3.75956
																		130.312	11.716	1.66865	1.49611				5.014	2.986	0.0642043	0.381307
																		135.501	11.182	1.73509	1.42792				5.061	51.797	0.0648062	6.61438
																		121.024	9.139	1.54971	1.16703				7.099	54.506	0.0909028	6.96031
																		138.647	10.596	1.77538	1.35309				3.656	0.577	0.0468151	0.0736818
																		131.134	10.794	1.67917	1.37837				6.69	58.163	0.0856656	7.42731
																		98.984	8.662	1.26749	1.10612				1.938	1.202	0.0248161	0.153493
																		154.463	11.035	1.9779	1.40915				7.979	44.129	0.102171	5.63519
																		145.834	13.119	1.86741	1.67527				3.704	1.036	0.0474298	0.132295
																		145.196	10.639	1.85924	1.35858				8.198	1.262	0.104976	0.161155
																		107.005	8.144	1.3702	1.03997				2.822	0.605	0.0361358	0.0772574
																		141.466	11.252	1.81147	1.43686				6.069	54.467	0.0777136	6.95533
																		100.512	9.908	1.28706	1.26523				5.286	75.732	0.0676873	9.67083
																		127.781	8.99	1.63624	1.14801				3.474	28.145	0.0444846	3.59406
																		91.299	7.701	1.16909	0.983403				5.671	58.952	0.0726172	7.52806
																		116.275	10.305	1.4889	1.31593				9.214	47.19	0.117985	6.02607
																		140.064	11.822	1.79352	1.50965				5.534	80.964	0.070863	10.339
																		145.542	9.988	1.86367	1.27545				6.996	59.742	0.0895839	7.62894
																		170.741	11.254	2.18634	1.43711				3.534	1.297	0.0452529	0.165624
																		68.857	9.201	0.881715	1.17495				4.877	2.852	0.0624501	0.364195
																		123.006	12.004	1.57509	1.53289				33.319	2.506	0.42665	0.320011
																		106.726	8.903	1.36663	1.1369				5.784	4.269	0.0740642	0.545143
																		134.981	9.191	1.72843	1.17367				4.926	3.556	0.0630775	0.454094
																		144.7	13.148	1.85289	1.67897				14.543	59.454	0.186223	7.59216
																		154.273	11.566	1.97547	1.47696				6.348	50.441	0.0812862	6.44122
																		134.89	13.39	1.72727	1.70988				7.237	0.569	0.0926699	0.0726602
																		113.399	9.512	1.45208	1.21466				5.407	55.648	0.0692367	7.10614
																		144.218	11.789	1.84671	1.50543				29.315	1.874	0.375379	0.239306
																		97.103	12.252	1.24341	1.56456				4.71	43.66	0.0603116	5.5753
																		155.22	8.274	1.98759	1.05657				12.07	1.742	0.154557	0.22245
																		176.346	14.448	2.25811	1.84498				38.637	4.453	0.494747	0.56864
																		88.135	10.414	1.12857	1.32985				26.663	3.499	0.34142	0.446816
																		122.119	8.949	1.56374	1.14277				3.81	43.736	0.0487871	5.585
																		130.764	9.642	1.67444	1.23127				4.657	59.273	0.059633	7.56905
																		109.21	14.198	1.39844	1.81306				27.432	4.057	0.351267	0.518071
																		117.55	12.024	1.50523	1.53544				5.676	44.595	0.0726813	5.6947
																		89.329	15.08	1.14386	1.92569				4.038	0.557	0.0517067	0.0711278
																		100.05	12.905	1.28114	1.64794				6.64	1.602	0.0850253	0.204572
																		12.507	2.874	0.160152	0.367004				7.152	70.902	0.0915815	9.05405
																		124.092	15.118	1.589	1.93054				3.583	0.528	0.0458804	0.0674246
																		124.621	13.071	1.59577	1.66914				12.247	89.477	0.156823	11.426
																		36.594	6.175	0.468587	0.788536				6.142	35.367	0.0786484	4.5163
																		123.355	9.496	1.57956	1.21262				58.852	5.625	0.753601	0.718302
																		54.381	6.681	0.69635	0.853151				7.614	0.975	0.0974974	0.124506
																		29.096	5.722	0.372575	0.730689				47.063	5.518	0.602642	0.704638
																		59.059	4.812	0.756251	0.614483				43.792	5.448	0.560757	0.695699
																		67.046	8.207	0.858525	1.04802				3.94	26.022	0.0504518	3.32296
																		49.369	6.303	0.632171	0.804881				4.85	51.236	0.0621043	6.54274
																		25.115	5.869	0.321598	0.74946				18.555	45.026	0.237597	5.74974
																		59.603	6.865	0.763217	0.876648				20.244	88.346	0.259225	11.2816
																		68.924	6.85	0.882573	0.874732				9.728	40.257	0.124567	5.14074
																		88.505	7.402	1.13331	0.945221				20.342	81.746	0.26048	10.4388
																		17.912	6.895	0.229363	0.880478				11.267	72.058	0.144274	9.20167
																		38.337	6.26	0.490906	0.79939				7.883	36.117	0.100942	4.61207
																		61.39	7.251	0.7861	0.925939				20.152	67.479	0.258047	8.61694
																		76.946	8.763	0.985295	1.11902				9.422	41.186	0.120649	5.25937
																		26.243	6.462	0.336042	0.825185				21.836	65.443	0.27961	8.35695
																		97.007	8.078	1.24218	1.03155				11.166	56.228	0.142981	7.18021
																		74.701	8.37	0.956547	1.06883				15.755	76.616	0.201743	9.78372
																		76.93	6.804	0.98509	0.868858				19.681	73.293	0.252016	9.35938
																		67.297	7.883	0.861739	1.00664				11.738	82.945	0.150305	10.5919
																		45.272	6.999	0.579709	0.893759				11.854	59.021	0.151791	7.53687
																		24.085	6.495	0.308409	0.829399				11.778	62.897	0.150817	8.03183
																		115.114	10.106	1.47404	1.29052				12.49	50.467	0.159935	6.44454
																		25.618	6.744	0.328039	0.861196				16.087	64.981	0.205994	8.29795
																		105.74	9.95	1.354	1.2706				8.76	46.491	0.112172	5.93681
																		67.079	6.399	0.858948	0.81714				12.562	67.496	0.160857	8.61911
																		48.344	7.45	0.619046	0.951351				12.339	66.186	0.158001	8.45183
																		97.078	8.425	1.24309	1.07586				9.01	44.489	0.115373	5.68116
																		119.426	9.191	1.52925	1.17367				8.673	41.888	0.111058	5.34902
																		76.066	6.878	0.974026	0.878308				12.195	56.24	0.156157	7.18174
																		92.243	9.786	1.18117	1.24965				17.798	75.294	0.227904	9.6149
																		83.373	8.689	1.06759	1.10957				16.087	72.809	0.205994	9.29757
																		27.371	6.934	0.350486	0.885459				13.145	5.887	0.168322	0.751759
																		44.164	8.05	0.565521	1.02797				16.207	61.692	0.207531	7.87795
																		90.575	8.669	1.15981	1.10701				17.23	72.654	0.22063	9.27778
																		80.445	8.16	1.0301	1.04202				14.075	54.412	0.180231	6.94831
																		81.621	8.913	1.04516	1.13817				2.782	1.063	0.0356236	0.135743
																		69.353	9.359	0.888066	1.19513				17.099	76.537	0.218953	9.77363
																		64.609	8.778	0.827319	1.12093				20.197	53.299	0.258623	6.80618
																		86.759	9.543	1.11095	1.21862				3.578	0.689	0.0458163	0.087984
																		77.179	10.065	0.988278	1.28528				19.523	66.213	0.249992	8.45528
																		78.419	7.508	1.00416	0.958757				9.619	46.336	0.123171	5.91702
																		30.593	6.449	0.391744	0.823525				11.377	76.471	0.145683	9.7652
																		95.215	12.183	1.21923	1.55575				11.82	43.834	0.151355	5.59752
																		75.561	8.501	0.96756	1.08556				15.073	44.572	0.19301	5.69176
																		61.73	9.413	0.790454	1.20202				78.871	4.93	1.00994	0.629552
																		46.396	5.085	0.594102	0.649345				14.954	90.004	0.191486	11.4933
																		96.567	7.214	1.23654	0.921214				21.863	45.335	0.279956	5.78919
																		53.517	8.941	0.685286	1.14175				12.77	72.355	0.16352	9.2396
																		59.527	9.215	0.762244	1.17674				16.18	50.194	0.207185	6.40968
																		78.101	10.303	1.00008	1.31567				23.864	88.021	0.305579	11.2401
																		88.396	9.369	1.13191	1.1964				18.066	48.917	0.231335	6.24661
																		78.801	7.741	1.00905	0.988511				24.578	87.472	0.314722	11.17
																		76.081	9.013	0.974218	1.15094				15.499	59.809	0.198465	7.6375
																		91.426	9.632	1.17071	1.22999				113.016	12.678	1.44717	1.61896
																		91.647	7.477	1.17354	0.954799				17.608	95.08	0.225471	12.1415
																		29.455	7.489	0.377172	0.956331				16.926	115.903	0.216738	14.8006
																		60.856	9.078	0.779262	1.15924				19.608	70.746	0.251081	9.03413
																		82.857	7.233	1.06099	0.92364				11.298	51.075	0.144671	6.52218
																		57.549	7.031	0.736916	0.897845				14.88	89.193	0.190539	11.3898
																		57.911	8.843	0.741551	1.12923				11.759	45.022	0.150574	5.74922
																		104.219	7.889	1.33453	1.00741				22.768	93.055	0.291545	11.8829
																		80.951	9.873	1.03658	1.26076				25.74	89.378	0.329601	11.4134
																		23.236	7.106	0.297537	0.907423				19.668	92.497	0.251849	11.8117
																		71.556	8.75	0.916276	1.11736				21.184	81.689	0.271261	10.4315
																		36.792	9.273	0.471122	1.18414				14.77	67.336	0.18913	8.59868
																		77.869	6.396	0.997114	0.816757				29.574	91.291	0.378696	11.6577
																		90.46	10.854	1.15834	1.38604				25.426	87.179	0.32558	11.1326
																		49.226	6.367	0.63034	0.813054				18.861	64.268	0.241515	8.2069
																		23.048	7.528	0.29513	0.961311				23.637	87.965	0.302672	11.233
																		60.835	7.882	0.778993	1.00652				17.404	84.724	0.222858	10.8191
																		97.271	7.896	1.24556	1.0083				22.515	114.665	0.288305	14.6425
																		59.907	7.772	0.76711	0.99247				31.491	114.286	0.403243	14.5941
																		89.809	10.72	1.15001	1.36892				15.594	64.34	0.199681	8.2161
																		58.671	6.232	0.751283	0.795815				31.683	86.481	0.405701	11.0435
																		69.961	12.904	0.895852	1.64782				15.499	65.058	0.198465	8.30778
																		52.472	5.441	0.671905	0.694805				20.944	96.765	0.268188	12.3567
																		58.272	6.334	0.746174	0.80884				21.393	103.54	0.273938	13.2219
																		108.72	10.497	1.39216	1.34045				25.885	119.113	0.331458	15.2105
																		72.974	6.499	0.934433	0.82991				13.794	63.611	0.176632	8.123
																		84.534	11.2	1.08246	1.43022				25.471	81.918	0.326157	10.4608
																		78.046	10.047	0.99938	1.28298				7.364	66.655	0.0942961	8.51172
																		74.601	8.762	0.955267	1.11889				67.457	5.031	0.863788	0.642449
																		73.121	6.902	0.936316	0.881372				71.79	2.153	0.919272	0.274934
																		57.723	6.27	0.739144	0.800667				4.487	0.756	0.0574561	0.0965398
																		43.205	5.166	0.553241	0.659688				17.63	37.235	0.225752	4.75484
																		78.666	9.104	1.00732	1.16256				71.046	6.663	0.909745	0.850853
																		50.65	5.164	0.648574	0.659433				81.275	5.434	1.04073	0.693912
																		113.842	11.682	1.45775	1.49177				13.696	52.616	0.175377	6.71896
																		48.228	7.923	0.61756	1.01175				3.862	6.108	0.049453	0.77998
																		60.569	9.825	0.775587	1.25463				69.907	5.517	0.89516	0.70451
																		108.799	12.781	1.39317	1.63211				65.529	5.822	0.8391	0.743458
																		70.699	6.606	0.905302	0.843574				40.498	3.71	0.518578	0.47376
																		119.632	9.859	1.53189	1.25898				3.672	2.178	0.04702	0.278126
																		56.075	6.403	0.718041	0.817651				15.992	85.783	0.204778	10.9543
																		98.472	9.269	1.26094	1.18363				87.17	7.356	1.11621	0.939347
																		56.142	6.826	0.718899	0.871667				10.486	41.339	0.134273	5.27891
																		88.906	10.207	1.13844	1.30341				4.361	9.887	0.0558427	1.26255
																		95.867	7.89	1.22758	1.00754				11.785	54.701	0.150907	6.98521
																		122.28	12.652	1.5658	1.61564				14.098	69.269	0.180525	8.84552
																		48.212	5.32	0.617355	0.679354				24.971	3.044	0.319754	0.388713
																		92.215	10.217	1.18081	1.30469				65.931	5.223	0.844248	0.666967
																		82.442	9.117	1.05567	1.16422				10.751	119.13	0.137667	15.2127
																		140.077	11.832	1.79369	1.51092				4.411	0.447	0.0564829	0.0570811
																		79.338	8.597	1.01592	1.09782				12.979	68.252	0.166196	8.71565
																		71.977	8.757	0.921667	1.11825				13.038	64.202	0.166952	8.19847
																		80.665	7.804	1.03292	0.996556				9.748	70.103	0.124823	8.95202
																		108.022	10.589	1.38322	1.3522				14.682	59.854	0.188003	7.64324
																		119.525	11.073	1.53052	1.414				13.822	63.026	0.176991	8.0483
																		64.931	6.447	0.831442	0.82327				11.901	88.034	0.152392	11.2418
																		96.348	10.225	1.23374	1.30571				9.66	82.437	0.123696	10.527
																		98.806	10.532	1.26521	1.34492				19.513	92.81	0.249864	11.8517
																		80.698	8.266	1.03334	1.05555				9.161	51.731	0.117307	6.60595
																		91.716	9.28	1.17442	1.18504				6.734	1.905	0.086229	0.243265
																		92.702	10.65	1.18705	1.35998				8.827	1.737	0.11303	0.221812
																		119.061	12.896	1.52458	1.64679				12.373	66.07	0.158436	8.43701
																		92.2	9.888	1.18062	1.26268				85.214	5.403	1.09117	0.689953
																		108.927	7.616	1.39481	0.972549				7.671	1.077	0.0982273	0.137531
																		86.84	9.357	1.11199	1.19487				69.323	4.197	0.887682	0.535949
																		71.126	7.543	0.91077	0.963227				7.011	49.859	0.089776	6.3669
																		98.092	7.008	1.25607	0.894908				8.638	46.908	0.11061	5.99006
																		173.206	12.941	2.21791	1.65254				22.609	57.406	0.289509	7.33064
																		115.361	11.829	1.4772	1.51054				93.681	7.491	1.19959	0.956587
																		105.908	11.244	1.35615	1.43584				11.528	36.498	0.147616	4.66073
																		51.88	7.34	0.664324	0.937304				7.117	53.002	0.0911333	6.76826
																		101.812	11.618	1.3037	1.4836				15.671	44.624	0.200667	5.6984
																		68.475	7.065	0.876823	0.902187				9.938	19.554	0.127256	2.49701
																		86.1	9.7	1.10251	1.23867				46.129	5.304	0.590683	0.677311
																		126.305	9.139	1.61734	1.16703				53.807	3.771	0.688999	0.48155
																		156.568	11.947	2.00486	1.52561				89.926	5.944	1.1515	0.759038
																		84.382	8.304	1.08051	1.06041				9.744	16.263	0.124772	2.07675
																		159.526	11.891	2.04273	1.51846				48.21	3.964	0.61733	0.506195
																		108.764	8.399	1.39272	1.07254				16.007	73.093	0.20497	9.33384
																		165.06	12.878	2.1136	1.6445				12.43	56.333	0.159166	7.19362
																		80.299	7.363	1.02823	0.940241				69.106	5.966	0.884903	0.761847
																		136.917	9.385	1.75322	1.19845				67.668	4.947	0.86649	0.631723
																		104.152	9.869	1.33367	1.26025				12.601	71.663	0.161356	9.15123
																		113.144	9.927	1.44881	1.26766				74.646	6.518	0.955843	0.832336
																		104.927	7.701	1.34359	0.983403				74.329	4.908	0.951784	0.626742
																		98.661	7.707	1.26336	0.984169				72.37	6.56	0.926699	0.8377
																		143.188	11.81	1.83352	1.50811				153.534	7.835	1.96601	1.00051
																		106.696	10.316	1.36624	1.31733				21.716	67.024	0.278074	8.55884
																		143.465	8.896	1.83707	1.136				52.61	3.645	0.673672	0.46546
																		98.457	11.095	1.26074	1.41681				125.399	6.42	1.60574	0.819822
																		116.844	8.767	1.49619	1.11953				13.952	50.703	0.178656	6.47468
																		150.812	10.868	1.93115	1.38782				79.059	6.293	1.01235	0.803604
																		137.159	8.503	1.75632	1.08582				15.948	64.307	0.204214	8.21188
																		109.349	10.955	1.40022	1.39893				14.973	0.983	0.19173	0.125527
																		99.467	9.282	1.27368	1.18529				20.115	56.733	0.257573	7.2447
																		152.382	11.372	1.95125	1.45218				85.423	6.81	1.09384	0.869624
																		75.498	6.656	0.966753	0.849959				118.638	7.311	1.51916	0.933601
																		107.792	8.651	1.38028	1.10472				6.516	1.146	0.0834375	0.146342
																		134.482	10.523	1.72204	1.34377				12.062	1.184	0.154454	0.151195
																		109.718	10.145	1.40494	1.2955				95.607	7.332	1.22425	0.936283
																		110.161	10.286	1.41061	1.3135				5.963	56.109	0.0763563	7.16501
																		165.021	11.104	2.1131	1.41796				32.001	3.535	0.409773	0.451413
																		46.549	9.988	0.596061	1.27545				55.528	4.344	0.711037	0.554721
																		101.496	6.877	1.29966	0.87818				25.523	83.771	0.326822	10.6974
																		129.364	12.385	1.65651	1.58154				108.46	6.71	1.38883	0.856854
																		23.515	6.021	0.30111	0.76887				24.91	74.477	0.318973	9.51057
																		107.736	7.838	1.37956	1.0009				20.193	64.684	0.258572	8.26002
																		145.667	10.846	1.86527	1.38501				18.621	60.686	0.238442	7.74949
																		81.847	9.562	1.04805	1.22105				22.836	33.884	0.292415	4.32692
																		146.935	10.605	1.88151	1.35424				76.435	6.381	0.978751	0.814842
																		137.772	11.968	1.76417	1.52829				47.921	4.666	0.613629	0.595839
																		185.36	4.86	2.37354	0.620613				16.655	86.553	0.213268	11.0527
																		36.841	4.635	0.47175	0.591881				7.682	55.287	0.0983681	7.06005
																		149.447	11.259	1.91367	1.43775				98.786	6.291	1.26496	0.803349
																		88.228	9.552	1.12976	1.21977				83.722	5.171	1.07206	0.660327
																		121.684	8.857	1.55817	1.13102				74.462	2.478	0.953487	0.316436
																		91.405	7.556	1.17044	0.964887				22.219	69.837	0.284515	8.91805
																		20.925	5.942	0.267945	0.758782				18.65	51.185	0.238814	6.53623
																		155.296	8.846	1.98857	1.12962				71.158	5.208	0.911179	0.665052
																		74.287	8.067	0.951246	1.03014				18.625	58.598	0.238493	7.48285
																		105.824	7.986	1.35508	1.0198				15.797	70.864	0.202281	9.0492
																		118.898	7.371	1.52249	0.941263				65.104	3.39	0.833658	0.432897
																		156.659	10.066	2.00602	1.28541				25.504	2.928	0.326579	0.3739
																		122.186	10.156	1.56459	1.2969				41.137	2.779	0.52676	0.354873
																		96.076	6.987	1.23025	0.892227				101.026	5.5	1.29364	0.70234
																		69.612	8.68	0.891383	1.10842				52.955	3.493	0.67809	0.44605
																		26.088	8.743	0.334057	1.11646				102.83	5.078	1.31674	0.648451
																		122.913	7.78	1.5739	0.993491				11.62	72.85	0.148794	9.30281
																		77.346	11.78	0.990417	1.50428				25.763	74.036	0.329896	9.45426
																		127.045	7.782	1.62681	0.993747				109.416	7.093	1.40107	0.905763
																		102.961	10.671	1.31842	1.36267				20.241	61.981	0.259186	7.91486
																		92.022	8.24	1.17834	1.05223				92.132	4.523	1.17975	0.577579
																		117.533	10.098	1.50501	1.2895				20.618	54.278	0.264014	6.9312
																		129.589	10.629	1.65939	1.3573				51.297	4.462	0.656859	0.569789
																		171.864	11.294	2.20072	1.44222				8.968	54.316	0.114835	6.93605
																		145.478	11.074	1.86285	1.41413				58.337	4.233	0.747006	0.540546
																		108.402	6.731	1.38809	0.859536				10.837	59.305	0.138768	7.57314
																		100.241	10.526	1.28359	1.34415				15.922	62.193	0.203881	7.94193
																		146.487	10.729	1.87577	1.37007
																		135.99	9.956	1.74135	1.27136
																		158.259	10.438	2.02651	1.33291
																		127.645	8.733	1.6345	1.11519
																		160.274	9.803	2.05231	1.25182
																		128.348	10.691	1.6435	1.36522
																		57.885	11.336	0.741218	1.44759
																		129.429	10.184	1.65734	1.30048
																		148.201	9.304	1.89772	1.1881
																		88.128	10.27	1.12848	1.31146
																		84.033	8.947	1.07604	1.14252
																		138.942	9.35	1.77915	1.19398
																		148.946	10.442	1.90726	1.33342
																		107.669	11.013	1.3787	1.40634
																		23.848	10.9	0.305374	1.39191
																		172.216	10.531	2.20523	1.34479
																		154.193	12.028	1.97444	1.53595
																		165.63	8.951	2.12089	1.14303
																		83.379	9.45	1.06767	1.20675
																		95.701	9.115	1.22545	1.16397
																		86.967	8.547	1.11361	1.09144
																		161.616	12.476	2.0695	1.59316
																		160.521	10.455	2.05547	1.33508
																		150.967	9.752	1.93313	1.24531
																		151.078	10.448	1.93456	1.33419
																		108.244	4.468	1.38607	0.570555
																		145.783	11.689	1.86675	1.49266
																		16.255	2.444	0.208146	0.312094
																		203.556	12.565	2.60654	1.60453
																		151.616	10.436	1.94145	1.33266
																		169.718	10.324	2.17324	1.31836
																		29.338	4.406	0.375674	0.562638
																		181.435	10.14	2.32328	1.29486
																		31.869	5.344	0.408083	0.682419
																		90.601	9.699	1.16015	1.23854
																		30.445	5.147	0.389849	0.657262
																		175.703	11.706	2.24988	1.49483
																		15.424	3.558	0.197505	0.45435
																		13.468	12.735	0.172458	1.62624
																		16.917	13.204	0.216622	1.68613
																		36.155	9.156	0.462965	1.1692
																		47.488	8.634	0.608085	1.10255
																		5.372	7.226	0.0687885	0.922747
																		33.082	6.109	0.423616	0.780108
																		45.296	10.39	0.580016	1.32678
																		13.942	16.151	0.178528	2.06245
																		67.879	7.399	0.869192	0.944838
																		43.257	8.373	0.553907	1.06922
																		52.658	10.261	0.674287	1.31031
																		68.043	11.586	0.871292	1.47951
																		61.453	9.906	0.786907	1.26498
																		74.055	8.39	0.948275	1.07139
																		58.232	14.031	0.745662	1.79173
																		60.784	7.3	0.77834	0.932196
																		42.395	8.657	0.542869	1.10548
																		68.384	9.143	0.875658	1.16754
																		44.37	10.291	0.568159	1.31414
																		43.729	9.537	0.559951	1.21786
																		60.283	10.865	0.771925	1.38744
																		64.733	10.418	0.828907	1.33036
																		23.777	17.069	0.304465	2.17968
																		41.665	7.745	0.533521	0.989022
																		67.729	9.473	0.867271	1.20968
																		20.845	12.429	0.266921	1.58716
																		119.842	9.036	1.53458	1.15388
																		5.202	2.894	0.0666117	0.369558
																		23.075	15.869	0.295476	2.02644
																		123.354	9.792	1.57955	1.25042
																		73.085	10.967	0.935855	1.40047
																		81.904	7.5	1.04878	0.957736
																		106.643	9.078	1.36557	1.15924
																		90.979	7.899	1.16499	1.00869
																		53.916	10.466	0.690395	1.33649
																		88.696	6.711	1.13575	0.856982
																		113.2	9.542	1.44953	1.2185
																		88.039	6.993	1.12734	0.892993
																		76.548	8	0.980198	1.02158
																		120.364	10.854	1.54126	1.38604
																		62.581	5.643	0.801351	0.7206
																		79.242	7.16	1.0147	0.914318
																		102.252	9.71	1.30934	1.23995
																		84.482	5.928	1.08179	0.756994
																		145.836	10.982	1.86743	1.40238
																		47.202	7.96	0.604422	1.01648
																		33.082	7.259	0.423616	0.926961
																		114.955	10.069	1.472	1.28579
																		77.442	6.952	0.991646	0.887757
																		62.665	5.531	0.802426	0.706298
																		87.989	9.662	1.1267	1.23382
																		26.962	8.18	0.345249	1.04457
																		47.408	4.295	0.60706	0.548463
																		81.793	7.874	1.04736	1.00549
																		62.425	7.053	0.799353	0.900655
																		91.799	7.539	1.17549	0.962716
																		82.402	9.667	1.05516	1.23446
																		59.234	6.82	0.758492	0.870901
																		51.92	7.05	0.664836	0.900272
																		60.274	7.372	0.77181	0.94139
																		71.592	7.317	0.916737	0.934367
																		90.691	9.168	1.1613	1.17074
																		98.311	7.746	1.25887	0.98915
																		81.089	7.868	1.03835	1.00473
																		70.63	7.611	0.904418	0.97191
																		75.912	8.12	0.972054	1.03691
																		78.958	8.467	1.01106	1.08122
																		79.659	7.9	1.02003	1.00882
																		68.711	7.261	0.879845	0.927216
																		59.005	6.73	0.75556	0.859408
																		64.455	6.082	0.825347	0.77666
																		108.516	9.184	1.38955	1.17278
																		143.345	10.454	1.83554	1.33496
																		71.447	6.761	0.91488	0.863367
																		64.35	7.502	0.824003	0.957991
																		80.02	8.68	1.02466	1.10842
																		68.979	7.626	0.883277	0.973826
																		41.435	5.63	0.530576	0.71894
																		73.549	6.62	0.941796	0.845362
																		68.441	6.781	0.876388	0.865921
																		57.685	6.188	0.738657	0.790196
																		72.52	7.085	0.92862	0.904741
																		74.785	7.496	0.957623	0.957225
																		83.436	7.888	1.0684	1.00728
																		42.458	10.45	0.543675	1.33445
																		60.123	6.148	0.769876	0.785088
																		96.371	9.472	1.23403	1.20956
																		77.872	7.712	0.997152	0.984808
																		75.146	6.891	0.962246	0.879968
																		92.811	8.017	1.18845	1.02376
																		88.578	9.519	1.13424	1.21556
																		75.427	5.938	0.965844	0.758271
																		124.388	9.052	1.59279	1.15592
																		100.736	10.699	1.28993	1.36624
																		68.685	8.851	0.879513	1.13026
																		103.916	9.467	1.33065	1.20892
																		115.977	10.107	1.48509	1.29064
																		57.733	6.892	0.739272	0.880095
																		62.811	6.671	0.804296	0.851874
																		67.754	8.109	0.867591	1.0355
																		135.884	10.197	1.74	1.30214
																		70.46	8.964	0.902241	1.14469
																		94.464	10.51	1.20961	1.34211
																		35.996	6.635	0.460929	0.847277
																		88.268	6.724	1.13027	0.858642
																		52.366	5.974	0.670547	0.762869
																		80.409	9.372	1.02964	1.19679
																		100.787	8.224	1.29058	1.05019
																		80.321	8.171	1.02851	1.04342
																		76.74	7.477	0.982657	0.954799
																		69.667	7.878	0.892087	1.00601
																		102.113	8.142	1.30756	1.03972
																		94.038	9.734	1.20416	1.24301
																		78.162	8.184	1.00087	1.04508
																		78.023	7.792	0.999086	0.995024
																		65.205	5.352	0.834951	0.68344
																		135.908	10.867	1.7403	1.3877
																		106.136	9.125	1.35907	1.16525
																		115.557	8.648	1.47971	1.10433
																		77.142	8.812	0.987805	1.12528
																		95.348	6.009	1.22093	0.767338
																		78.806	8.734	1.00911	1.11532
																		93.506	9.183	1.19735	1.17265
																		76.376	7.405	0.977996	0.945605
																		16.651	14.514	0.213216	1.85341
																		110.728	3.491	1.41787	0.445794
																		110.612	9.259	1.41639	1.18236
																		106.23	9.185	1.36028	1.17291
																		124.548	6.154	1.59484	0.785854
																		88.267	7.568	1.13026	0.966419
																		113.412	10.298	1.45224	1.31504
																		93.582	7.72	1.19832	0.985829
																		115.631	8.247	1.48066	1.05313
																		113.507	8.441	1.45346	1.0779
																		105.41	9.361	1.34978	1.19538
																		91.985	8.599	1.17787	1.09808
																		100.131	9.319	1.28218	1.19002
																		99.214	8.584	1.27044	1.09616
																		85.887	6.415	1.09978	0.819183
																		98.015	7.756	1.25508	0.990427
																		106.108	9.764	1.35871	1.24684
																		81.239	9.038	1.04027	1.15414
																		108.128	10.396	1.38458	1.32755
																		131.145	12.165	1.67931	1.55345
																		121.38	11.002	1.55427	1.40493
																		121.44	11.44	1.55504	1.46087
																		109.066	8.938	1.39659	1.14137
																		125.022	9.561	1.60091	1.22092
																		145.381	10.818	1.86161	1.38144
																		118.748	10.284	1.52057	1.31325
																		88.477	8.175	1.13295	1.04393
																		131.66	12.08	1.68591	1.54259
																		133.371	10.309	1.70782	1.31644
																		99.535	8.244	1.27455	1.05274
																		124.016	10.415	1.58803	1.32998
																		95.289	9.283	1.22018	1.18542
																		113.496	8.419	1.45332	1.07509
																		91.645	8.146	1.17352	1.04023
																		103.864	9.948	1.32998	1.27034
																		128.706	11.875	1.64808	1.51642
																		127.976	8.912	1.63873	1.13805
																		162.925	10.566	2.08626	1.34926
																		120.357	12.231	1.54117	1.56188
																		89.923	7.999	1.15147	1.02146
																		111.449	8.344	1.42711	1.06551
																		131.736	11.826	1.68688	1.51016
																		133.758	10.557	1.71277	1.34811
																		125.995	13.327	1.61337	1.70183
																		99.479	8.83	1.27383	1.12757
																		135.891	11.609	1.74009	1.48245
																		88.364	11.84	1.1315	1.51195
																		139.508	7.796	1.7864	0.995534
																		167.726	13.797	2.14773	1.76185
																		72.31	10.347	0.925931	1.32129
																		106.564	8.16	1.36455	1.04202
																		97.055	14.074	1.24279	1.79722
																		102.105	11.06	1.30746	1.41234
																		95.304	3.709	1.22037	0.473632
																		67.261	4.099	0.861278	0.523435
																		60.025	4.924	0.768621	0.628786
																		66.425	5.54	0.850573	0.707448
																		41.826	3.857	0.535583	0.492532
																		64.279	4.727	0.823094	0.603629
																		56.585	5.209	0.724572	0.665179
																		85.813	5.623	1.09884	0.718046
																		39.458	5.082	0.50526	0.648962
																		46.729	5.37	0.598366	0.685739
																		88.834	4.935	1.13752	0.63019
																		52.09	5.175	0.667013	0.660838
																		71.205	6.125	0.911781	0.782151
																		67.211	6.181	0.860638	0.789302
																		84.342	6.949	1.08	0.887374
																		79.219	5.188	1.0144	0.662498
																		44.428	5.21	0.568901	0.665307
																		69.056	5.681	0.884263	0.725453
																		98.091	7.131	1.25606	0.910615
																		55.05	5.135	0.704916	0.65573
																		47.127	4.842	0.603462	0.618314
																		40.166	5.04	0.514326	0.643598
																		50.207	4.139	0.642901	0.528542
																		46.064	5.859	0.58985	0.748183
																		84.28	4.839	1.07921	0.617931
																		55.581	6.011	0.711716	0.767593
																		85.754	6.55	1.09808	0.836423
																		44.467	4.868	0.569401	0.621634
																		4.463	3.888	0.0571488	0.49649
																		45.321	4.746	0.580336	0.606055
																		60.974	8.064	0.780773	1.02976
																		7.983	4.811	0.102222	0.614356
																		48.037	4.755	0.615115	0.607205
																		45.138	5.312	0.577993	0.678332
																		58.593	5.026	0.750284	0.641811
																		35.152	3.897	0.450122	0.49764
																		25.484	3.705	0.326323	0.473122
																		42.583	4.874	0.545276	0.622401
																		68.515	6.676	0.877336	0.852513
																		41.699	5.117	0.533956	0.653431
																		49.205	4.458	0.630071	0.569278
																		83.772	7.194	1.0727	0.91866
																		39.927	5.712	0.511266	0.729412
																		51.445	4.364	0.658754	0.557275
																		86.877	6.347	1.11246	0.8105
																		52.945	5.018	0.677962	0.640789
																		45.058	4.631	0.576968	0.59137
																		43.151	4.526	0.552549	0.577962
																		36.93	4.132	0.472889	0.527649
																		31.398	4.817	0.402052	0.615122
																		42.794	3.332	0.547978	0.42549
																		46.218	4.904	0.591822	0.626232
																		45.23	4.468	0.579171	0.570555
																		40.063	4.87	0.513007	0.62189
																		24.184	3.785	0.309677	0.483337
																		29.972	5.141	0.383792	0.656496
																		49.596	6.13	0.635078	0.782789
																		46.279	4.341	0.592603	0.554338
																		36.673	3.633	0.469598	0.463927
																		45.281	5.029	0.579824	0.642194
																		42.675	4.774	0.546454	0.609631
																		44.358	5.137	0.568005	0.655985
																		31.835	5.317	0.407648	0.678971
																		32.141	4.793	0.411566	0.612057
																		47.506	4.755	0.608315	0.607205
																		19.452	3.229	0.249083	0.412337
																		33.947	5.085	0.434692	0.649345
																		35.988	3.599	0.460827	0.459586
																		36.584	4.713	0.468459	0.601841
																		45.558	5.663	0.583371	0.723154
																		45.311	3.594	0.580208	0.458947
																		73.676	6.973	0.943422	0.890439
																		30.141	4.143	0.385956	0.529053
																		17.711	2.797	0.22679	0.357172
																		70.549	6.675	0.903381	0.852385
																		28.712	4.171	0.367658	0.532629
																		40.513	6.552	0.51877	0.836678
																		40.485	4.698	0.518411	0.599926
																		23.596	3.394	0.302147	0.433407
																		27.209	3.442	0.348412	0.439537
																		40.2	5.739	0.514762	0.732859
																		100.746	6.951	1.29005	0.88763
																		37.914	5.602	0.485489	0.715365
																		26.389	4.617	0.337912	0.589582
																		58.956	6.01	0.754933	0.767466
																		34.312	4.718	0.439366	0.60248
																		25.232	4.108	0.323096	0.524584
																		36.927	4.673	0.472851	0.596733
																		33.773	4.052	0.432464	0.517433
																		28.163	4.656	0.360628	0.594562
																		36.746	5.277	0.470533	0.673863
																		66.547	5.181	0.852135	0.661604
																		52.176	5.167	0.668115	0.659816
																		34.144	4.206	0.437214	0.537098
																		47.311	5.637	0.605818	0.719834
																		37.191	5.009	0.476231	0.63964
																		39.929	5.103	0.511291	0.651643
																		46.137	6.315	0.590785	0.806414
																		75.913	7.735	0.972067	0.987745
																		87.52	6.202	1.12069	0.791984
																		48.65	5.563	0.622964	0.710385
																		30.499	3.772	0.39054	0.481677
																		47.778	6.307	0.611798	0.805392
																		28.303	4.213	0.36242	0.537992
																		37.901	5.809	0.485323	0.741798
																		48.603	6.365	0.622362	0.812798
																		39.943	5.61	0.511471	0.716386
																		51.921	4.491	0.664849	0.573492
																		55.916	5.863	0.716005	0.748694
																		32.821	4.142	0.420273	0.528926
																		44.058	5.751	0.564163	0.734392
																		43.478	2.271	0.556736	0.290002
																		20.435	3.348	0.261671	0.427533
																		59.333	6.289	0.75976	0.803093
																		50.445	5.746	0.645949	0.733753
																		77.825	5.149	0.99655	0.657518
																		49.678	6.374	0.636128	0.813948
																		46.062	5.33	0.589825	0.680631
																		29.402	6.322	0.376493	0.807307
																		44.969	5.968	0.575829	0.762102
																		34.963	4.91	0.447702	0.626998
																		65.16	6.878	0.834375	0.878308
																		54.173	6.988	0.693686	0.892354
																		69.413	5.317	0.888835	0.678971
																		34.121	2.933	0.43692	0.374539
																		49.73	3.78	0.636793	0.482699
																		50.157	3.826	0.642261	0.488573
																		46.149	6.087	0.590939	0.777298
																		34.453	5.643	0.441171	0.7206
																		21.351	4.445	0.2734	0.567618
																		79.442	6.604	1.01726	0.843318
																		49.709	6.145	0.636525	0.784705
																		46.752	5.942	0.59866	0.758782
																		94.345	7.838	1.20809	1.0009
																		37.162	3.891	0.47586	0.496873
																		51.024	5.725	0.653363	0.731072
																		54.632	5.867	0.699564	0.749205
																		44.258	4.938	0.566724	0.630573
																		65.242	5.016	0.835425	0.640534
																		57.639	7.068	0.738068	0.90257
																		32.887	6.818	0.421119	0.870646
																		21.661	3.562	0.277369	0.454861
																		33.771	4.727	0.432438	0.603629
																		33.771	5.014	0.432438	0.640278
																		56.712	4.778	0.726198	0.610142
																		65.581	4.568	0.839766	0.583325
																		49.123	6.025	0.629021	0.769381
																		36.766	4.761	0.470789	0.607971
																		55.828	7.099	0.714878	0.906529
																		50.565	5.76	0.647486	0.735541
																		54.662	6.386	0.699948	0.81548
																		7.358	2.273	0.0942193	0.290258
																		68.755	7.179	0.880409	0.916745
																		48.085	5.749	0.615729	0.734136
																		47.471	5.081	0.607867	0.648834
																		58.998	6.542	0.75547	0.835401
																		53.837	6.079	0.689384	0.776277
																		34.147	4.861	0.437253	0.620741
																		49.44	5.291	0.63308	0.675651
																		66.938	6.274	0.857142	0.801178
																		82.808	7.185	1.06036	0.917511
																		84.423	7.314	1.08104	0.933984
																		72.163	5.483	0.924048	0.700169
																		61.982	6.92	0.79368	0.883671
																		52.885	5.077	0.677193	0.648323
																		48.338	5.078	0.618969	0.648451
																		67.036	7.155	0.858397	0.91368
																		61.188	5.504	0.783513	0.70285
																		60.374	6.338	0.77309	0.809351
																		64.519	5.464	0.826167	0.697742
																		50.822	6.401	0.650777	0.817396
																		53.928	5.654	0.690549	0.722005
																		35.517	4.209	0.454796	0.537481
																		63.435	6.073	0.812286	0.775511
																		53.238	5.805	0.681713	0.741288
																		64.735	6.625	0.828933	0.846
																		65.193	7.648	0.834797	0.976635
																		62.376	5.535	0.798726	0.706809
																		62.686	6.51	0.802695	0.831315
																		20.375	10.207	0.260902	1.30341
																		69.088	4.854	0.884673	0.619847
																		61.299	6.145	0.784935	0.784705
																		58.953	6.533	0.754894	0.834252
																		60.022	7.297	0.768583	0.931813
																		82.248	5.2	1.05319	0.66403
																		112.904	7.288	1.44574	0.930664
																		60.792	6.937	0.778443	0.885842
																		63.447	6.882	0.81244	0.878818
																		49.985	7.765	0.640059	0.991576
																		55.851	6.372	0.715173	0.813692
																		63.55	6.411	0.813759	0.818673
																		71.675	7.275	0.9178	0.929004
																		65.79	5.961	0.842442	0.761208
																		68.513	5.567	0.87731	0.710895
																		94.484	7.279	1.20987	0.929515
																		121.55	8.693	1.55645	1.11008
																		92.111	7.735	1.17948	0.987745
																		34.239	5.231	0.438431	0.667989
																		48.146	4.409	0.61651	0.563021
																		86.638	7.52	1.1094	0.96029
																		57.019	5.562	0.730129	0.710257
																		99.673	6.505	1.27631	0.830676
																		82.158	6.178	1.05203	0.788919

## Sheet: F1F2I, J
Fluorescence intensity analysis of SOX2 and GATA6 in H9 hESC treated with ACL for 6 days using Fiji
Units = fluorescence intensity (a.u.)
	Exp 1	Average fluorescence intensity (A.U.)	33.3299	9.18413	1	1		Exp 1	Average fluorescence intensity (A.U.)	7.00641	25.0414	0.210214	2.72659			Exp 2	Average fluorescence intensity (A.U.)	51.8048	16.3986	1	1		Exp 2	Average fluorescence intensity (A.U.)	9.86137	29.0896	0.190356	1.7739			Exp 3	Average fluorescence intensity (A.U.)	50.0955	13.7433	1	1		Exp 3	Average fluorescence intensity (A.U.)	8.31349	29.3396	0.165953	2.13483
	Control	Standard Deviation	10.2072	2.33115	0.306249	0.253824		ACL	Standard Deviation	5.73092	31.3163	0.171945	3.40983			Control	Standard Deviation	10.7368	3.08259	0.207254	0.187978		ACL	Standard Deviation	7.99891	29.9164	0.154405	1.82433			Control	Standard Deviation	11.4374	2.26463	0.228313	0.164781		ACL	Standard Deviation	6.56757	30.9519	0.131101	2.25215
			SOX2	GATA6	rel SOX2	rel GATA6				SOX2	GATA6	rel SOX2	rel GATA6					SOX2	GATA6	rel SOX2	rel GATA6				SOX2	GATA6	rel SOX2	rel GATA6					SOX2	GATA6	rel SOX2	rel GATA6				SOX2	GATA6	rel SOX2	rel GATA6				SOX2
			29.909	6.101	0.897364	0.664298				2.645	22.211	0.0793583	2.41841					39.619	10.625	0.764775	0.64792				8.185	2.649	0.157997	0.161538					39.642	8.684	0.791329	0.631871				10.763	1.755	0.21485	0.127699				Number of values	3227	3661
			19.348	6.537	0.580501	0.711772				1.303	1.921	0.0390941	0.209165					42.802	12.392	0.826217	0.755673				7.067	2.602	0.136416	0.158672					52.234	11.201	1.04269	0.815015				13.635	1.912	0.27218	0.139122
			23.039	5.534	0.691242	0.602561				2.014	37.043	0.0604263	4.03337					47.114	12.65	0.909452	0.771406				9.161	2.233	0.176837	0.13617					42.375	11.936	0.845885	0.868496				13.673	1.826	0.272939	0.132865				Minimum	0.02571	0
			18.061	5.173	0.541887	0.563254				3.304	22.184	0.0991303	2.41547					37.299	10.545	0.719991	0.643042				8.788	2.572	0.169637	0.156842					20.679	7.744	0.412792	0.563475				7.618	19.348	0.15207	1.40781				25% Percentile	0.8831	0.07246
			10.529	5.35	0.315903	0.582527				2.925	30.066	0.0877592	3.27369					38.873	10.541	0.750374	0.642798				8.18	2.468	0.1579	0.1505					45.101	11.876	0.900301	0.86413				19.963	2.45	0.398499	0.178269				Median	1.017	0.1341
			10.508	4.428	0.315273	0.482136				2.793	24.392	0.0837987	2.65589					53.95	11.802	1.04141	0.719695				6.847	2.268	0.132169	0.138304					25.469	9.248	0.508409	0.67291				2.153	17.411	0.0429779	1.26687				75% Percentile	1.156	0.2659
			30.767	7.07	0.923106	0.769807				2.601	24.962	0.0780381	2.71795					49.211	11.495	0.949931	0.700974				7.068	2.125	0.136435	0.129584					38.441	11.232	0.767355	0.817271				2.977	30.772	0.0594265	2.23905				Maximum	1.788	1.279
			2.195	1.585	0.0658569	0.17258				3.136	29.071	0.0940898	3.16535					41.318	11.39	0.797571	0.694571				7.936	2.554	0.15319	0.155745					45.779	12.191	0.913835	0.88705				9.59	2.848	0.191435	0.207228
			17.648	6.327	0.529495	0.688906				1.343	1.086	0.0402942	0.118248					48.423	12.532	0.93472	0.764211				1.781	12.378	0.034379	0.75482					55.116	12.312	1.10022	0.895855				12.217	1.898	0.243874	0.138104				Mean	1	0.1888
			22.7	5.918	0.681071	0.644373				2.291	12.306	0.0687372	1.33992					61.242	14.412	1.18217	0.878855				10.148	2.241	0.195889	0.136658					39.538	11.394	0.789253	0.829058				2.288	23.623	0.0456728	1.71887				Std. Deviation	0.2554	0.1546
			22.028	5.754	0.660909	0.626516				2	1.765	0.0600063	0.192179					43.702	11.201	0.84359	0.683045				1.679	16.124	0.0324101	0.983254					48.373	12.396	0.965616	0.901967				12.914	2.216	0.257788	0.161242				Std. Error of Mean	0.004496	0.002555
			17.131	5.716	0.513984	0.622378				3.684	1.684	0.110532	0.18336					44.122	12.384	0.851697	0.755186				10.782	3.87	0.208127	0.235996					45.091	12.02	0.900102	0.874608				15.88	1.634	0.316995	0.118894
			26.15	6.297	0.784582	0.68564				2.786	30.665	0.0835887	3.33891					47.131	11.407	0.90978	0.695607				4.693	3.921	0.09059	0.239106					47.625	13.318	0.950685	0.969054				10.248	1.353	0.204569	0.098448				Lower 95% CI of mean	0.9912	0.1838
			31.518	6.249	0.945639	0.680413				7.991	1.349	0.239755	0.146884					39.238	10.699	0.75742	0.652433				10.475	2.678	0.202201	0.163306					42.683	11.585	0.852033	0.842956				13.844	1.985	0.276352	0.144434				Upper 95% CI of mean	1.009	0.1938
			19.497	5.299	0.584971	0.576974				2.837	27.374	0.0851189	2.98058					42.786	10.636	0.825908	0.648591				10.792	2.742	0.20832	0.167209					49.616	14.374	0.990429	1.04589				7.404	18.277	0.147798	1.32988
			25.558	5.852	0.76682	0.637186				3.061	43.205	0.0918396	4.70431					44.338	13.447	0.855866	0.820008				1.549	21.865	0.0299007	1.33334					47.537	14.142	0.948928	1.02901				2.454	39.871	0.0489865	2.90112				Sum	3227	691.1
			23.777	6.086	0.713384	0.662665				2.293	23.652	0.0687972	2.57531					37.925	10.047	0.732075	0.612674				11.694	2.877	0.225732	0.175442					46.615	12.146	0.930523	0.883776				2.93	38.704	0.0584883	2.81621
			27.595	6.216	0.827936	0.67682				1.503	1.43	0.0450947	0.155703					23.236	10.204	0.44853	0.622248				1.782	23.141	0.0343984	1.41116					49.421	12.993	0.986536	0.945406				13.186	1.681	0.263217	0.122314				D'Agostino & Pearson normality test
			30.256	7.339	0.907775	0.799096				0.865	0.809	0.0259527	0.0880868					41.821	10.182	0.80728	0.620906				11.323	2.696	0.21857	0.164404					35.379	12.077	0.706232	0.878755				5.607	18.515	0.111926	1.3472				K2	374.1	1100
			21.23	7.576	0.636966	0.824902				3.041	30.334	0.0912395	3.30287					40.046	11.357	0.773017	0.692558				7.771	2.404	0.150005	0.146598					46.527	12.116	0.928767	0.881593				2.342	36.896	0.0467507	2.68465				P value	<0.0001	<0.0001
			26.185	6.946	0.785632	0.756305				7.434	1.189	0.223043	0.129463					49.567	15.82	0.956803	0.964715				9.696	2.49	0.187164	0.151842					40.813	12.38	0.814705	0.900802				0.739	1.196	0.0147518	0.0870242				Passed normality test (alpha=0.05)?	No	No
			30.456	7.465	0.913775	0.812816				1.3	0.892	0.0390041	0.0971241					37.876	10.638	0.731129	0.648713				7.746	2.481	0.149523	0.151293					33.478	10.699	0.668284	0.778488				2.933	19.756	0.0585482	1.4375				P value summary	****	****
			31.8	7.171	0.9541	0.780804				1.926	6.262	0.057786	0.681829					47.363	12.397	0.914259	0.755978				13.022	3.182	0.251367	0.194041					46.613	12.345	0.930483	0.898256				2.72	11.095	0.0542963	0.807302
			22.053	5.876	0.661659	0.6398				5.859	1.25	0.175788	0.136104					53.033	17.029	1.02371	1.03844				6.677	2.387	0.128888	0.145561					46.863	13.845	0.935474	1.0074				9.54	1.422	0.190436	0.103469
			3.683	2.271	0.110502	0.247274				1.992	1.652	0.0597662	0.179876					55.77	11.902	1.07654	0.725793				11.277	3.296	0.217682	0.200993					49.361	12.816	0.985339	0.932527				7.713	1.226	0.153966	0.0892071
			23.169	6.204	0.695143	0.675513				2.233	22.36	0.066997	2.43464					45.45	10.854	0.877332	0.661885				7.023	2.353	0.135567	0.143488					47.716	13.419	0.952501	0.976403				2.401	24.932	0.0479285	1.81412				Column B	hESC-ACL
			23.35	6.105	0.700573	0.664734				2.237	18.974	0.067117	2.06596					33.54	10.651	0.64743	0.649506				4.971	2.602	0.0959563	0.158672					43.988	12.379	0.878084	0.90073				2.097	17.893	0.0418601	1.30194				vs.	vs.
			26.59	6.388	0.797783	0.695548				7.105	1.717	0.213172	0.186953					48.015	14.589	0.926844	0.889648				11.869	2.645	0.22911	0.161294					44.203	13.148	0.882375	0.956684				5.131	0.871	0.102424	0.0633763				Column A	hESC
			24.145	6.161	0.724426	0.670831				2.874	31.176	0.086229	3.39455					36.128	9.869	0.697387	0.601819				13.469	2.894	0.259995	0.176478					48.148	12.932	0.961125	0.940967				2.212	19.628	0.0441557	1.42819
			17.034	6.326	0.511073	0.688797				3.422	25.917	0.102671	2.82193					38.489	10.07	0.742962	0.614076				11.697	3.111	0.22579	0.189711					38.625	12.274	0.771028	0.89309				12.176	1.372	0.243056	0.0998305				Mann Whitney test
			15.914	5.371	0.47747	0.584813				1	1.667	0.0300031	0.181509					49.32	12.645	0.952035	0.771102				10.749	2.56	0.20749	0.156111					47.986	13.987	0.957891	1.01773				1.537	18.451	0.0306814	1.34254				P value	<0.0001
			16.419	6.042	0.492621	0.657874				1.167	0.778	0.0350137	0.0847114					52.411	12.126	1.0117	0.739453				13.152	3.581	0.253876	0.218372					41.395	11.767	0.826322	0.856199				13.31	1.512	0.265693	0.110017				Exact or approximate P value?	Approximate
			29.621	7.228	0.888723	0.78701				2.388	34.075	0.0716475	3.71021					51.611	13.073	0.996259	0.797201				4.586	2.302	0.0885246	0.140378					28.854	10.864	0.57598	0.790494				2.197	14.888	0.0438563	1.08329				P value summary	****
			25.135	6.63	0.754129	0.721898				7.288	1.515	0.218663	0.164959					45.19	11.264	0.872313	0.686887				3.718	5.331	0.0717694	0.325088					46.816	13.62	0.934536	0.991028				11.245	1.524	0.224471	0.11089				Significantly different (P < 0.05)?	Yes
			29.954	7.144	0.898714	0.777864				1	1.897	0.0300031	0.206552					56.83	12.584	1.097	0.767382				5.899	2.202	0.11387	0.13428					56.409	15.081	1.12603	1.09733				2.555	10.887	0.0510026	0.792168				One- or two-tailed P value?	Two-tailed
			29.664	6.846	0.890013	0.745417				1	0.2	0.0300031	0.0217767					44.93	12.275	0.867294	0.748539				5.701	2.392	0.110048	0.145866					48.424	12.842	0.966634	0.934419				1.815	21.936	0.0362308	1.59612				Sum of ranks in column A,B	16844663 , 6881054
			17.59	4.809	0.527755	0.523621				2.502	27.327	0.0750678	2.97546					49.414	11.762	0.95385	0.717256				9.766	2.545	0.188515	0.155196					42.154	12.76	0.841473	0.928452				9.727	1.581	0.194169	0.115038				Mann-Whitney U	177763
			25.952	6.523	0.778641	0.710247				1.207	3.241	0.0362138	0.352892					44.887	13.62	0.866464	0.830558				8.688	2.373	0.167706	0.144707					45.083	14.435	0.899942	1.05033				3.249	12.883	0.0648562	0.937402
			22.901	6.472	0.687102	0.704694				1.363	1.225	0.0408943	0.133382					52.64	11.798	1.01612	0.719451				4.885	2.892	0.0942963	0.176356					43.721	13.58	0.872754	0.988118				3.268	37.477	0.0652355	2.72693				Difference between medians
			23.861	6.243	0.715905	0.67976				1.031	0.831	0.0309332	0.0904822					47.142	13.146	0.909993	0.801653				8.119	2.655	0.156723	0.161904					45.515	13.024	0.908565	0.947662				1.24	8.532	0.0247527	0.620812				Median of column A	1.017, n=3227
			26.265	6.398	0.788032	0.696637				9.1	1.639	0.273029	0.17846					41.832	10.943	0.807493	0.667312				12.362	3.014	0.238626	0.183796					47.832	12.611	0.954817	0.917611				15.936	1.9	0.318113	0.138249				Median of column B	0.1341, n=3661
			25.81	7.792	0.774381	0.84842				2.892	25.901	0.0867691	2.82019					43.124	12.667	0.832432	0.772443				7.261	2.62	0.140161	0.15977					47.526	13.379	0.948709	0.973492				8.758	1.589	0.174826	0.11562				Difference: Actual	-0.8825
			11.612	5.437	0.348396	0.592				1.155	1.722	0.0346536	0.187497					48.982	14.99	0.945511	0.914101				5.844	2.591	0.112808	0.158001					43.676	12.433	0.871855	0.904659				3.67	13.394	0.0732601	0.974584				Difference: Hodges-Lehmann	-0.8447
			27.813	7.106	0.834477	0.773726				7.96	1.724	0.238825	0.187715					50.65	11.667	0.977708	0.711462				9.107	2.842	0.175794	0.173307					45.312	12.761	0.904513	0.928525				3.01	23.627	0.0600853	1.71916
			25.019	6.754	0.750648	0.735399				2	13.945	0.0600063	1.51838					51.32	16.27	0.990642	0.992157				6.982	2.713	0.134775	0.165441					43.603	13.684	0.870398	0.995685				4.93	2.085	0.0984121	0.15171
			28.228	8.132	0.846928	0.885441				3.816	2.895	0.114492	0.315218					57.772	17.778	1.11519	1.08412				11.439	2.515	0.22081	0.153367					44.783	13.64	0.893953	0.992483				1.712	27.53	0.0341748	2.00316
			19.805	5.452	0.594212	0.593633				6.542	1.762	0.19628	0.191853					48.163	13.789	0.929701	0.840864				7.017	3.079	0.135451	0.18776					45.72	13.843	0.912658	1.00725				2.564	23.834	0.0511823	1.73423
			27.63	8.32	0.828987	0.905911				2.415	20.589	0.0724576	2.2418					50.23	12.914	0.969601	0.787505				12.94	2.811	0.249784	0.171417					50.739	12.074	1.01285	0.878537				3.713	1.07	0.0741185	0.0778561
			8.786	4.277	0.263608	0.465695				2.6	1.2	0.0780081	0.13066					51.668	13.426	0.997359	0.818728				7.366	2.566	0.142188	0.156477					52.825	13.986	1.05449	1.01766				2.23	27.689	0.044515	2.01473
			4.075	2.177	0.122263	0.237039				3.233	40.984	0.0970001	4.46248					50.777	12.498	0.98016	0.762137				5.909	2.635	0.114063	0.160684					42.193	12.564	0.842252	0.914191				15.667	1.55	0.312743	0.112782
			7.77	7.325	0.233124	0.797572				2.538	28.25	0.0761479	3.07596					38.388	9.759	0.741012	0.595111				14.595	2.69	0.281731	0.164038					12.679	5.606	0.253097	0.407908				2.577	24.742	0.0514418	1.8003
			29.745	7.416	0.892443	0.80748				2.687	34.594	0.0806184	3.76672					48.245	14.192	0.931284	0.865439				7.319	2.777	0.14128	0.169344					44.753	13.194	0.893354	0.960031				6.692	1.399	0.133585	0.101795
			22.545	7.63	0.676421	0.830781				5.632	1.522	0.168978	0.165721					39.637	11.712	0.765122	0.714207				2.278	22.336	0.0439728	1.36207					45.894	12.776	0.916131	0.929617				2.312	16.878	0.0461519	1.22809
			3.014	3.565	0.0904294	0.38817				2.569	33.632	0.077078	3.66197					48.857	12.138	0.943098	0.740184				9.063	2.775	0.174945	0.169222					53.126	14.527	1.0605	1.05702				16.031	2.462	0.320009	0.179142
			16.635	7.161	0.499102	0.779715				2.527	38.522	0.0758179	4.19441					43.157	10.783	0.833069	0.657555				6.792	3.706	0.131108	0.225995					42.226	13.587	0.842911	0.988627				2.877	36.956	0.0574304	2.68902
			33.725	7.697	1.01186	0.838076				5.511	1.338	0.165347	0.145686					47.477	13.056	0.916459	0.796165				7.141	2.825	0.137844	0.172271					50.82	14.11	1.01446	1.02668				2.58	41.039	0.0515017	2.98611
			29.462	9.157	0.883952	0.997046				7.922	2.072	0.237685	0.225607					27.746	9.525	0.535587	0.580842				6.999	7.011	0.135103	0.427536					44.285	12.098	0.884012	0.880283				1.583	7.318	0.0315997	0.532478
			27.927	7.2	0.837897	0.783961				8.251	1.682	0.247556	0.183142					48.807	11.825	0.942133	0.721097				3.009	5.673	0.0580834	0.345944					57.098	15.569	1.13978	1.13284				9.719	1.866	0.19401	0.135775
			14.127	5.545	0.423854	0.603759				2.093	19.062	0.0627966	2.07554					50.391	15.97	0.972709	0.973863				5.983	3.227	0.115491	0.196785					46.518	14.442	0.928587	1.05084				2.457	29.567	0.0490464	2.15138
			8.704	3.927	0.261147	0.427586				4.265	3.429	0.127963	0.373362					41.013	11.902	0.791683	0.725793				9.091	2.854	0.175486	0.174039					49.246	13.16	0.983043	0.957557				2.666	18.61	0.0532184	1.35411
			29.144	7.865	0.874411	0.856369				2.014	1.372	0.0604263	0.149388					47.105	13.031	0.909279	0.79464				12.579	2.924	0.242815	0.178308					54.815	13.082	1.09421	0.951882				17.128	3.019	0.341907	0.219671
			29.413	8.314	0.882482	0.905258				2.542	34.992	0.076268	3.81005					51.062	13.863	0.985661	0.845376				4.817	3.21	0.0929836	0.195748					42.777	13.084	0.85391	0.952027				18.856	2.858	0.376401	0.207956
			3.218	2.334	0.0965501	0.254134				1.103	1.517	0.0330935	0.165176					46.186	11.517	0.891539	0.702315				9.258	3.154	0.178709	0.192333					57.329	14.081	1.1444	1.02457				7.774	17.19	0.155184	1.25079
			10.524	7.032	0.315753	0.765669				5.627	13.949	0.168828	1.51882					46.491	12.681	0.897426	0.773297				10.919	3.145	0.210772	0.191784					49.128	13.968	0.980688	1.01635				17.225	2.073	0.343844	0.150837
			16.398	6.56	0.491991	0.714276				12.218	2.262	0.366578	0.246295					50.617	14.159	0.977071	0.863426				10.2	2.934	0.196893	0.178918					52.345	13.425	1.04491	0.97684				8.688	1.94	0.173429	0.14116
			42.03	8.254	1.26103	0.898725				5.317	0.862	0.159527	0.0938576					51.432	12.072	0.992804	0.73616				10.143	2.983	0.195793	0.181906					52.974	13.296	1.05746	0.967453				3.167	24.331	0.0632193	1.77039
			25.205	9.693	0.756229	1.05541				3.274	38.513	0.0982303	4.19343					54.014	15.661	1.04264	0.95502				8.742	2.863	0.168749	0.174588					52.167	14.933	1.04135	1.08657				3.224	24.241	0.0643571	1.76384
			26.222	7.472	0.786742	0.813578				9.809	1.778	0.294301	0.193595					53.051	15.866	1.02406	0.967521				7.418	2.767	0.143191	0.168734					50.974	12.949	1.01754	0.942204				3.347	25.938	0.0668124	1.88732
			21.358	7.633	0.640807	0.831108				2.105	1.211	0.0631566	0.131858					49.263	13.615	0.950935	0.830253				8.79	2.821	0.169675	0.172027					54.908	14.42	1.09607	1.04924				2.882	31.343	0.0575302	2.2806
			30.75	8.37	0.922596	0.911355				2.83	32.33	0.0849089	3.5202					57.955	16.87	1.11872	1.02875				8.566	2.833	0.165351	0.172758					55.005	14.491	1.098	1.0544				14.586	2.551	0.291164	0.185618
			12.871	8.513	0.38617	0.926925				2.684	40.405	0.0805284	4.39944					43.407	11.684	0.837895	0.712499				8.311	3.053	0.160429	0.186174					55.174	13.572	1.10138	0.987536				2.259	15.233	0.0450939	1.10839
			32.367	8.751	0.971111	0.95284				1.345	1.466	0.0403542	0.159623					57.233	13.766	1.10478	0.839461				9.802	3.101	0.18921	0.189101					60.934	14.27	1.21636	1.03832				10.162	1.791	0.202853	0.130318
			26.722	7.322	0.801744	0.797245				1.694	1.694	0.0508253	0.184449					46.969	12.091	0.906653	0.737318				4.1	6.152	0.0791432	0.375154					42.812	13.97	0.854608	1.0165				14.594	2.207	0.291324	0.160587
			28.49	7.838	0.854789	0.853429				3.598	30.088	0.107951	3.27609					44.826	12.776	0.865286	0.77909				11.489	3.108	0.221775	0.189528					56.175	12.959	1.12136	0.942932				1.967	47.201	0.039265	3.43447
			16.576	6.804	0.497332	0.740844				1.9	10.8	0.057006	1.17594					21.576	8.374	0.416486	0.510653				7.54	4.066	0.145546	0.247948					48.703	13.855	0.972204	1.00813				19.082	3.107	0.380913	0.226074
			41.526	9.043	1.24591	0.984634				1.971	2.305	0.0591362	0.250977					46.936	12.842	0.906016	0.783115				14.188	2.935	0.273874	0.178979					51.749	12.502	1.03301	0.90968				11.365	1.902	0.226867	0.138395
			26.566	8.977	0.797063	0.977447				3.492	38.172	0.104771	4.1563					44.875	13.96	0.866232	0.851291				10.107	2.96	0.195098	0.180503					59.704	14.035	1.1918	1.02122				3.413	21.839	0.0681299	1.58907
			23.131	7.716	0.694002	0.840145				1.905	19.753	0.057156	2.15078					12.646	6.153	0.244109	0.375215				8.275	2.507	0.159734	0.152879					56.327	13.972	1.12439	1.01664				12.392	1.91	0.247368	0.138977
			15.976	6.108	0.47933	0.665061				8.256	8.622	0.247706	0.938794					56.959	13.165	1.09949	0.802812				8.415	3.457	0.162437	0.21081					44.732	13.049	0.892935	0.949481				19.938	3.056	0.398	0.222363
			33.842	7.702	1.01537	0.838621				2.556	26.266	0.076688	2.85993					55.284	17.993	1.06716	1.09723				11.428	3.082	0.220597	0.187943					52.998	14.615	1.05794	1.06343				2.431	33.019	0.0485274	2.40255
			25.626	8.547	0.76886	0.930627				1.967	18.271	0.0590162	1.98941					53.505	13.943	1.03282	0.850255				9.747	2.895	0.188149	0.176539					47.915	13.77	0.956474	1.00194				13.688	2.332	0.273238	0.169683
			34.036	9.516	1.02119	1.03614				2.813	39.797	0.0843988	4.33324					35.273	10.168	0.680883	0.620052				3.174	16.984	0.0612684	1.0357					23.759	9.477	0.474275	0.689572				18.399	2.496	0.367279	0.181616
			30.26	9.494	0.907895	1.03374				2.557	23.833	0.076718	2.59502					59.647	13.983	1.15138	0.852694				8.19	3.106	0.158093	0.189406					41.185	11.84	0.82213	0.861511				2.862	18.777	0.0571309	1.36627
			18.015	7.225	0.540506	0.786683				3.132	41.363	0.0939698	4.50375					58.92	17.603	1.13735	1.07344				8.213	3.019	0.158537	0.184101					37.777	11.789	0.7541	0.8578				3.072	21.01	0.0613229	1.52874
			39.05	9.198	1.17162	1.00151				3.02	1.852	0.0906095	0.201652					43.763	14.207	0.844767	0.866354				17.392	3.224	0.335722	0.196602					51.716	14.527	1.03235	1.05702				14.955	1.685	0.29853	0.122605
			15.229	6.53	0.456918	0.711009				2.508	24.078	0.0752479	2.6217					39.04	12.027	0.753598	0.733415				13.227	3.077	0.255324	0.187638					52.658	12.76	1.05115	0.928452				2.633	35.724	0.0525597	2.59938
			21.578	7.507	0.647408	0.817389				2.404	30.586	0.0721275	3.33031					38.677	11.123	0.746591	0.678289				7.533	3.356	0.145411	0.204651					51.621	14.439	1.03045	1.05062				2.219	24.727	0.0442954	1.7992
			20.8	7.611	0.624065	0.828713				5.364	25.234	0.160937	2.74757					58.839	16.802	1.13578	1.0246				9.185	2.93	0.1773	0.178674					60.238	13.653	1.20246	0.993429				2.107	34.218	0.0420597	2.48979
			43.225	11.803	1.29689	1.28515				3.033	34.99	0.0909995	3.80983					47.017	14.334	0.90758	0.874098				6.473	3.613	0.12495	0.220323					57.446	12.347	1.14673	0.898401				2.214	1.866	0.0441956	0.135775
			43.091	10.207	1.29286	1.11137				5.132	5.091	0.153976	0.554326					54.142	14.463	1.04512	0.881965				11.121	2.668	0.214671	0.162697					55.321	13.994	1.10431	1.01824				21.495	3.151	0.429081	0.229275
			36.836	10.336	1.1052	1.12542				8.533	1.814	0.256017	0.197515					51.94	14.386	1.00261	0.877269				9.612	3.557	0.185543	0.216909					56.575	16.002	1.12934	1.16435				2.457	43.733	0.0490464	3.18213
			15.101	7.346	0.453077	0.799858				3.155	40.65	0.0946599	4.42612					50.055	16.632	0.966223	1.01423				9.556	3.75	0.184462	0.228678					68.589	13.852	1.36917	1.00791				2.445	40.939	0.0488068	2.97883
			30.333	10.266	0.910085	1.1178				2.492	28.077	0.0747678	3.05712					39.976	12.538	0.771666	0.764577				11.166	3	0.21554	0.182942					62.869	14.35	1.25498	1.04415				15.145	1.871	0.302323	0.136139
			44.487	9.608	1.33475	1.04615				2.731	31.519	0.0819386	3.4319					3.83	3.712	0.0739314	0.226361				3.012	34.891	0.0581413	2.12768					54.47	14.057	1.08732	1.02283				23.094	2.126	0.461	0.154694
			37.129	10.385	1.11399	1.13076				3.054	29.834	0.0916296	3.24843					62.72	18.324	1.2107	1.11741				1.801	9.922	0.0347651	0.605051					44.9	12.215	0.896289	0.888797				17.97	3.452	0.358715	0.251177
			24.791	8.344	0.743808	0.908524				3.421	26.951	0.102641	2.93452					45.286	15.379	0.874166	0.937823				5.304	4.693	0.102384	0.286183					34.86	9.699	0.695871	0.705726				4.208	30.557	0.0839996	2.22341
			6.525	3.076	0.19577	0.334926				2.514	2.286	0.0754279	0.248908					57.326	18.788	1.10658	1.14571				14.989	3.164	0.289336	0.192943					51.067	14.924	1.01939	1.08591				3.271	51.511	0.0652953	3.74808
			13.262	5.458	0.397902	0.594286				9.395	2.527	0.281879	0.275149					51.793	16.318	0.999772	0.995084				7.176	3.368	0.13852	0.205383					55.457	14.602	1.10703	1.06248				3.142	42.163	0.0627203	3.06789
			8.163	4.433	0.244916	0.482681				2.533	33.419	0.0759979	3.63878					49.351	13.005	0.952634	0.793055				16.693	3.585	0.322229	0.218616					43.508	13.082	0.868502	0.951882				3.698	33.815	0.0738191	2.46047
			19.93	7.791	0.597962	0.848312				3.212	28.32	0.0963701	3.08358					60.005	15.003	1.15829	0.914894				5.712	4.701	0.11026	0.286671					58.05	14.619	1.15879	1.06372				3.231	42.827	0.0644969	3.11621
			35.665	9.276	1.07006	1.01				8.36	3.888	0.250826	0.423339					44.613	13.681	0.861175	0.834278				12.149	3.014	0.234515	0.183796					55.055	14.489	1.099	1.05426				5.852	45.519	0.116817	3.31209
			7.082	2.333	0.212482	0.254025				8.683	2.26	0.260517	0.246077					51.377	14.491	0.991742	0.883672				7.367	3.418	0.142207	0.208432					59.123	14.872	1.18021	1.08213				3.365	41.692	0.0671718	3.03362
			9.674	12.415	0.29025	1.35179				2.743	25.661	0.0822986	2.79406					53.524	16.17	1.03319	0.986059				10.775	3.359	0.207992	0.204834					56.48	14.696	1.12745	1.06932				14.729	2.309	0.294019	0.168009
			25.489	9.12	0.76475	0.993018				3.132	31.779	0.0939698	3.46021					64.523	15.674	1.2455	0.955812				14.077	4.668	0.271732	0.284658					60.678	15.322	1.21125	1.11487				2.839	34.896	0.0566718	2.53913
			40.757	11.288	1.22284	1.22908				3.283	39.561	0.0985003	4.30754					40.237	14.231	0.776704	0.867817				14.297	3.294	0.275978	0.200871					56.502	15.737	1.12789	1.14507				3.411	45.463	0.06809	3.30801
			25.104	11.167	0.753199	1.2159				2	3.667	0.0600063	0.399276					53.742	15.249	1.03739	0.929895				10.152	3.47	0.195966	0.211603					19.907	11.105	0.397381	0.80803				2.997	16.723	0.0598258	1.21681
			41.612	12.472	1.24849	1.358				2.692	27.771	0.0807684	3.0238					55.258	17.661	1.06666	1.07698				9.781	3.38	0.188805	0.206115					53.686	13.762	1.07167	1.00136				2.411	34.44	0.0481281	2.50595
			44.882	7.336	1.3466	0.79877				1.713	1.404	0.0513954	0.152872					49.023	14.523	0.946302	0.885623				9.457	3.762	0.182551	0.22941					65.101	15.282	1.29954	1.11196				15.516	2.62	0.309729	0.190638
			28.296	10.501	0.848969	1.14339				5.255	2.262	0.157666	0.246295					59.092	16.665	1.14067	1.01624				8.938	3.252	0.172532	0.198309					33.605	13.229	0.670819	0.962578				3.683	46.778	0.0735196	3.40369
			40.844	10.914	1.22545	1.18835				11.418	1.744	0.342576	0.189893					57.562	15.616	1.11113	0.952275				8.971	3.411	0.173169	0.208005					44.619	10.37	0.890679	0.754549				2.347	34.986	0.0468506	2.54568
			41.889	13.964	1.2568	1.52045				2.556	2.333	0.076688	0.254025					63.371	15.958	1.22326	0.973131				8.331	3.515	0.160815	0.214347					47.662	12.213	0.951424	0.888651				3.111	35.409	0.0621014	2.57646
			37.19	11.386	1.11582	1.23975				5.599	28.549	0.167988	3.10852					53.629	15.032	1.03521	0.916663				9.614	3.691	0.185581	0.22508					39.852	9.268	0.795521	0.674365				4.044	58.496	0.0807259	4.25633
			39.808	9.88	1.19436	1.07577				4.373	1.653	0.131204	0.179984					52.619	15.162	1.01572	0.92459				8.829	3.886	0.170428	0.236971					45.859	9.714	0.915432	0.706817				9.678	2.262	0.193191	0.164589
			43.098	10.99	1.29307	1.19663				5.853	20.738	0.175608	2.25803					52.255	14.739	1.00869	0.898795				9.889	3.562	0.19089	0.217213					44.758	10.969	0.893454	0.798134				13.036	2.465	0.260223	0.17936
			46.77	10.629	1.40325	1.15732				13.01	2.213	0.390341	0.240959					46.695	14.103	0.901364	0.860012				16.359	2.954	0.315781	0.180137					21.426	10.106	0.427703	0.73534				9.609	2.29	0.191814	0.166627
			48.302	10.479	1.44921	1.14099				3.231	28.626	0.0969401	3.1169					49.611	14.943	0.957652	0.911235				14.434	3.952	0.278623	0.240996					45.442	11.078	0.907108	0.806065				15.779	2.976	0.314979	0.216542
			47.959	9.758	1.43892	1.06249				2.937	23.16	0.0881192	2.52174					59.311	17.678	1.14489	1.07802				17.672	3.102	0.341127	0.189162					31.266	10.422	0.624128	0.758333				3.673	25.308	0.07332	1.84148
			37.529	10.52	1.12599	1.14545				4.782	1.97	0.143475	0.214501					58.213	18.409	1.1237	1.12259				11.53	3.577	0.222566	0.218128					39.246	10.959	0.783424	0.797407				2.666	21.446	0.0532184	1.56047
			46.733	11.293	1.40214	1.22962				7.612	1.849	0.228384	0.201326					60.621	16.771	1.17018	1.02271				9.664	3.434	0.186546	0.209408					31.461	9.912	0.628021	0.721224				3.712	26.143	0.0740985	1.90224
			35.349	10.778	1.06058	1.17355				1.959	17.832	0.0587761	1.94161					62.154	18.298	1.19977	1.11583				7.622	3.862	0.147129	0.235508					43.79	12.047	0.874131	0.876572				3.593	28.866	0.0717231	2.10037
			32.092	10.411	0.962861	1.13359				3.356	2.169	0.100691	0.236168					59.262	17.862	1.14395	1.08924				10.065	3.423	0.194287	0.208737					49.072	11.238	0.97957	0.817707				2.415	23.206	0.048208	1.68853
			42.705	12.85	1.28128	1.39915				2.579	33.182	0.0773781	3.61297					63.068	17.319	1.21742	1.05613				12.11	3.734	0.233762	0.227702					43.378	11.514	0.865907	0.83779				3.767	12.195	0.0751964	0.887341
			39.623	10.023	1.18881	1.09134				9.233	1.967	0.277019	0.214174					54.441	16.152	1.05089	0.984961				10.108	3.625	0.195117	0.221055					44.678	10.237	0.891857	0.744872				14.39	1.966	0.287252	0.143052
			33.464	10.214	1.00402	1.11214				2.899	30.445	0.0869791	3.31496					65.939	19.483	1.27284	1.18809				18.994	3.958	0.366645	0.241362					43.521	10.169	0.868761	0.739924				2.217	16.17	0.0442555	1.17657
			38.979	10.126	1.16949	1.10255				3.6	43.388	0.108011	4.72424					50.871	14.679	0.981974	0.895136				23.306	5.101	0.449881	0.311063					27.11	9.061	0.541167	0.659303				2.92	16.274	0.0582887	1.18414
			40.368	10.904	1.21117	1.18727				1.667	2	0.0500152	0.217767					67.827	17.921	1.30928	1.09284				5.398	74.816	0.104199	4.56234					47.227	11.011	0.94274	0.80119				15.87	1.412	0.316795	0.102741
			44.359	11.063	1.33091	1.20458				8.564	2.004	0.256947	0.218203					63.022	17.154	1.21653	1.04606				10.196	3.956	0.196816	0.24124					23.751	10.133	0.474115	0.737305				1.798	9.911	0.0358915	0.721151
			39.946	11.942	1.19851	1.30029				3.449	25.287	0.103481	2.75334					55.151	15.253	1.06459	0.930139				18.705	39.99	0.361067	2.43862					43.49	10.781	0.868143	0.784455				5.002	23.011	0.0998494	1.67434
			39.043	11.124	1.17141	1.21122				2.574	36.316	0.0772281	3.95421					58.542	18.347	1.13005	1.11881				25.34	4.777	0.489144	0.291305					39.52	10.795	0.788894	0.785474				3.095	17.199	0.061782	1.25145
			45.965	10.565	1.37909	1.15035				3.177	33.408	0.09532	3.63758					62.969	19.281	1.2155	1.17577				3.831	35.05	0.0739507	2.13738					39.371	11.008	0.78592	0.800972				2.356	23.309	0.0470302	1.69603
			40.272	9.775	1.20829	1.06434				1.132	1.283	0.0339635	0.139698					67.423	17.013	1.30148	1.03747				24.145	3.924	0.466076	0.239288					39.193	11.969	0.782366	0.870897				2.406	7.414	0.0480283	0.539463
			37.896	12.005	1.137	1.30715				1.62	25.695	0.0486051	2.79776					61.66	21.168	1.19024	1.29084				18.689	4.169	0.360758	0.254229					22.825	7.84	0.45563	0.57046				13.182	1.648	0.263138	0.119913
			38.357	11.06	1.15083	1.20425				2.721	59.556	0.0816385	6.48467					58.78	18.424	1.13464	1.12351				3.64	47.373	0.0702637	2.88884					52.754	10.703	1.05307	0.778779				4.25	16.598	0.084838	1.20772
			44.309	11.103	1.32941	1.20893				2.667	52.286	0.0800184	5.69308					53.811	16.355	1.03873	0.99734				1.644	23.712	0.0317345	1.44598					42.649	12.325	0.851355	0.896801				9.612	1.872	0.191874	0.136212
			42.581	11.487	1.27756	1.25075				1.807	43.521	0.0542157	4.73872					60.459	18.523	1.16705	1.12955				19.295	4.556	0.372456	0.277828					28.72	10.989	0.573305	0.79959				1.905	14.411	0.0380274	1.04858
			37.715	14.777	1.13157	1.60897				3.246	41.592	0.0973902	4.52868					62.544	16.893	1.2073	1.03015				4.114	87.285	0.0794135	5.3227					48.485	10.816	0.967852	0.787002				3.192	31.502	0.0637183	2.29217
			54.345	11.807	1.63052	1.28559				1.774	19.558	0.0532256	2.12954					58.497	19.583	1.12918	1.19419				5.415	60.608	0.104527	3.69592					44.681	11.948	0.891917	0.869369				9.286	1.605	0.185366	0.116784
			51.899	12.64	1.55713	1.37629				2.116	41.92	0.0634866	4.5644					57.359	19.099	1.10721	1.16467				3.481	58.293	0.0671945	3.55475					46.562	11.009	0.929465	0.801045				2.477	26.474	0.0494456	1.92632
			41.315	13.557	1.23958	1.47613				2.193	34.919	0.0657969	3.8021					63.559	18.72	1.22689	1.14156				21.559	3.998	0.416158	0.243801					42.185	11.428	0.842092	0.831532				2.457	11.922	0.0490464	0.867477
			48.664	12.224	1.46007	1.33099				1.307	2.053	0.0392141	0.223538					59.897	20.639	1.15621	1.25858				4.999	63	0.0964968	3.84179					50.166	11.756	1.00141	0.855399				11.114	1.513	0.221856	0.11009
			38.472	13.353	1.15428	1.45392				1.229	1.053	0.0368738	0.114654					61.765	19.258	1.19226	1.17437				4.123	55.378	0.0795872	3.37699					50.94	10.736	1.01686	0.781181				2.948	23.142	0.0588476	1.68387
			43.319	13.695	1.29971	1.49116				2.206	45.589	0.0661869	4.96389					62.668	20.278	1.20969	1.23657				18.82	4.407	0.363287	0.268742					18.772	15.093	0.374725	1.09821				2.827	27.417	0.0564323	1.99494
			45.988	13.449	1.37978	1.46437				2.148	28.92	0.0644467	3.14891					70.2	18.355	1.35509	1.1193				3.541	58.315	0.0683527	3.55609					63.91	9.928	1.27576	0.722388				7.908	1.506	0.157859	0.109581
			42.163	15.13	1.26502	1.64741				2.869	49.484	0.086079	5.38799					56.873	19.505	1.09783	1.18943				14.11	26.33	0.272369	1.60562					57.059	12.078	1.13901	0.878828				3.817	23.302	0.0761945	1.69552
			23.281	13.121	0.698503	1.42866				2.857	40.216	0.0857189	4.37886					59.452	21.053	1.14762	1.28383				3.299	46.691	0.0636813	2.84725					29.149	10.277	0.581869	0.747782				2.482	24.233	0.0495454	1.76326
			19.008	5.479	0.5703	0.596573				1.969	23.914	0.0590762	2.60384					65.77	20.691	1.26957	1.26175				16.708	4.703	0.322518	0.286792					43.373	11.79	0.865807	0.857872				1.828	1.509	0.0364903	0.109799
			23.427	5.774	0.702883	0.628693				1.322	0.657	0.0396641	0.0715365					57.138	20.489	1.10295	1.24943				23.779	4.697	0.459011	0.286427					39.05	10.427	0.779512	0.758697				1.821	18.516	0.0363506	1.34727
			27.28	6.418	0.818485	0.698814				1.336	1.309	0.0400842	0.142529					52.305	18.19	1.00966	1.10924				23.161	3.798	0.447082	0.231605					45.487	11.748	0.908006	0.854816				1.969	24.197	0.039305	1.76064
			7.824	8.449	0.234745	0.919957				2.458	39.299	0.0737477	4.27901					60.659	20.082	1.17091	1.22462				3.911	44.647	0.0754949	2.72261					50.813	13.323	1.01432	0.969418				10.809	1.644	0.215768	0.119622
			28.176	6.708	0.845368	0.730391				2.365	63.667	0.0709574	6.93229					66.779	19.745	1.28905	1.20406				14.949	4.415	0.288564	0.26923					48.757	12.06	0.973282	0.877518				1.69	17.473	0.0337356	1.27138
			34.482	7.001	1.03457	0.762294				3.257	39.819	0.0977202	4.33563					62.152	18.871	1.19973	1.15077				19.411	5.449	0.374695	0.332284					16.08	9.011	0.320987	0.655665				10.236	1.741	0.20433	0.12668
			19.747	7.911	0.592472	0.861378				3.75	49.561	0.112512	5.39638					57.952	19.289	1.11866	1.17626				15.72	5.209	0.303447	0.317649					45.207	12.237	0.902417	0.890397				2.005	26.498	0.0400236	1.92807
			16.787	6.843	0.503663	0.74509				3.452	48.687	0.103571	5.30121					65.796	20.107	1.27008	1.22614				5.143	30.085	0.0992765	1.83461					51.934	11.939	1.0367	0.868714				8.795	1.771	0.175565	0.128863
			27.43	6.515	0.822986	0.709376				1.937	9.785	0.0581161	1.06543					60.964	17.291	1.1768	1.05442				18.837	4.625	0.363615	0.282036					42.07	13.334	0.839797	0.970218				3.486	38.924	0.0695871	2.83222
			11.639	5.819	0.349206	0.633593				2.923	2.031	0.0876992	0.221142					69.268	21.579	1.3371	1.3159				28.585	4.589	0.551783	0.279841					49.128	11.251	0.980688	0.818653				9.856	1.446	0.196744	0.105215
			36.522	7.339	1.09577	0.799096				2.38	43.936	0.0714075	4.78391					59.266	18.428	1.14403	1.12375				20.53	4.622	0.396295	0.281853					31.057	12.652	0.619956	0.920594				1.915	17.122	0.038227	1.24584
			21.369	7.439	0.641137	0.809985				1.959	58.885	0.0587761	6.41161					57.107	21.055	1.10235	1.28395				17.771	5.222	0.343038	0.318441					31.868	10.779	0.636145	0.784309				3.964	27.307	0.0791289	1.98693
			15.719	6.27	0.471619	0.6827				3.035	44.445	0.0910595	4.83933					59.838	18.558	1.15507	1.13168				9.008	36.338	0.173883	2.21592					43.696	10.929	0.872255	0.795224				6.043	10.259	0.12063	0.746473
			16.715	7.009	0.501502	0.763165				2.073	12.799	0.0621965	1.3936					59.988	21.762	1.15796	1.32706				4.786	52.779	0.0923852	3.2185					39.994	11.122	0.798356	0.809267				2.757	23.845	0.0550349	1.73503
			17.017	5.371	0.510563	0.584813				2.441	53.304	0.0732376	5.80393					58.115	17.763	1.12181	1.0832				23.171	4.651	0.447275	0.283621					47.084	12.801	0.939886	0.931436				2.841	21.977	0.0567117	1.59911
			24.418	8.066	0.732616	0.878255				3.543	29.689	0.106301	3.23264					70.379	20.542	1.35854	1.25267				3.98	60.623	0.0768268	3.69684					54.436	13.76	1.08665	1.00122				2.4	21.98	0.0479085	1.59932
			17.403	6.007	0.522145	0.654063				2.433	1.267	0.0729976	0.137955					58.654	21.469	1.13221	1.3092				11.056	32.799	0.213416	2.00011					56.711	14.451	1.13206	1.05149				2.575	34.763	0.0514019	2.52945
			29.098	8.355	0.873031	0.909722				1.961	1.473	0.0588361	0.160385					60.163	17.75	1.16134	1.08241				11.332	4.645	0.218744	0.283256					49	12.3	0.978133	0.894981				3.021	39.333	0.0603049	2.86198
			19.115	7.039	0.57351	0.766431				2.972	48.976	0.0891693	5.33268					44.517	12.753	0.859322	0.777688				17.062	4.908	0.329352	0.299294					51.724	12.606	1.03251	0.917247				2	19.787	0.0399238	1.43976
			10.5	5.828	0.315033	0.634573				2.61	48.888	0.0783082	5.3231					49.206	13.829	0.949835	0.843303				17.463	5.862	0.337092	0.357469					49.537	12.405	0.988852	0.902622				3.023	21.939	0.0603448	1.59634
			32.943	8.964	0.988393	0.976032				2.319	31.019	0.0695773	3.37746					46.638	14.636	0.900264	0.892514				16.785	4.806	0.324005	0.293073					45.468	12.949	0.907627	0.942204				25.035	3.036	0.499746	0.220908
			25.376	7.558	0.761359	0.822942				1.903	16.198	0.057096	1.7637					56.861	14.769	1.0976	0.900625				4.354	68.169	0.0840463	4.157					50.275	12.909	1.00358	0.939294				2.785	25.393	0.0555939	1.84766
			19.533	6.573	0.586051	0.715691				2.542	37.731	0.076268	4.10828					54.712	14.67	1.05612	0.894588				13.833	4.254	0.267022	0.259412					42.965	13.342	0.857663	0.9708				2.321	26.761	0.0463315	1.9472
			26.752	8.21	0.802644	0.893934				1.512	1.317	0.0453647	0.1434					51.712	16.115	0.998208	0.982705				3.966	60.718	0.0765566	3.70263					30.282	10.203	0.604486	0.742398				2.709	24.266	0.0540768	1.76566
			18.484	5.987	0.554578	0.651886				1.192	1.146	0.0357637	0.124781					39.298	14.531	0.758578	0.886111				12.386	4.549	0.23909	0.277401					50.675	13.302	1.01157	0.96789				8.755	1.87	0.174766	0.136066
			31.92	8.706	0.9577	0.94794				1.219	1.625	0.0365738	0.176936					55.139	15.864	1.06436	0.967399				6.965	49.766	0.134447	3.03477					37.819	11.836	0.754939	0.86122				11.232	2.083	0.224212	0.151565
			29.904	8.638	0.897214	0.940536				2.192	30.916	0.0657669	3.36624					45.894	14.35	0.885902	0.875074				3.422	68.653	0.0660556	4.18651					30.836	9.844	0.615545	0.716276				2.358	26.684	0.0470701	1.9416
			33.467	9.554	1.00411	1.04027				2.045	6.209	0.0613564	0.676058					53.596	15.604	1.03458	0.951544				11.105	4.319	0.214362	0.263376					48.307	12.04	0.964299	0.876063				6.847	2.022	0.136679	0.147126
			36.072	9.294	1.08227	1.01196				2.439	33.687	0.0731776	3.66796					45.602	15.01	0.880266	0.915321				14.554	4.98	0.280939	0.303684					32.873	8.786	0.656207	0.639293				17.153	2.209	0.342406	0.160733
			33.477	7.942	1.00441	0.864753				2.649	46.867	0.0794783	5.10304					43.065	15.862	0.831293	0.967277				4.405	30.1	0.0850307	1.83552					37.625	12.921	0.751066	0.940167				1.837	0.824	0.03667	0.0599565
			22.632	6.986	0.679031	0.76066				2.27	27.281	0.0681071	2.97045					45.915	15.641	0.886308	0.9538				20.738	5.166	0.40031	0.315027					35.71	12.543	0.712839	0.912663				26.91	2.697	0.537174	0.196241
			33.279	9.569	0.998474	1.04191				1.858	38.416	0.0557458	4.18287					44.661	16.049	0.862101	0.97868				5.269	33.733	0.101709	2.05706					48.183	13.247	0.961824	0.963888				2.22	20.131	0.0443154	1.46479
			23.309	6.932	0.699343	0.754781				2.574	36.559	0.0772281	3.98067					54.308	15.108	1.04832	0.921297				13.243	42.921	0.255633	2.61735					42.96	13.762	0.857563	1.00136				15.528	5.624	0.309968	0.409218
			23.721	7.764	0.711704	0.845372				8.364	1.8	0.250946	0.19599					47.893	16.066	0.924489	0.979717				4.12	37.986	0.0795293	2.31641					50.17	11.657	1.00149	0.848195				4.668	21.457	0.0931821	1.56127
			20.343	7.825	0.610354	0.852014				2.462	42.899	0.0738677	4.67099					46.52	15.206	0.897986	0.927273				4.485	69.102	0.086575	4.21389					38.851	11.738	0.775539	0.854089				17.723	2.446	0.353785	0.177978
			21.001	6.991	0.630096	0.761205				2.042	15.718	0.0612664	1.71143					37.909	15.378	0.731766	0.937762				4.233	63.301	0.0817106	3.86014					47.588	12.478	0.949946	0.907933				14.917	2.814	0.297771	0.204754
			19.237	7.197	0.57717	0.783635				2.206	23.714	0.0661869	2.58206					50.52	17.332	0.975199	1.05692				6.892	19.87	0.133038	1.21169					4.1	3.117	0.0818437	0.226801				11.296	2.057	0.225489	0.149673
			39.877	10.036	1.19643	1.09276				2.116	20.284	0.0634866	2.20859					45.294	16.389	0.87432	0.999414				5.002	75.126	0.0965547	4.58124					28.304	11.867	0.565001	0.863475				14.317	2.212	0.285794	0.160951
			28.287	8.542	0.848699	0.930083				3.118	18.125	0.0935498	1.97351					44.756	17.257	0.863935	1.05234				5.405	54.521	0.104334	3.32473					61.64	13.057	1.23045	0.950063				13.636	2.225	0.2722	0.161897
			28.53	8.395	0.855989	0.914077				1.545	0.909	0.0463548	0.0989751					41.835	15.45	0.807551	0.942153				4.055	59.552	0.0782746	3.63153					48.54	15.445	0.96895	1.12382				13.248	2.796	0.264455	0.203445
			27.108	8.856	0.813325	0.964272				2.034	3.006	0.0610264	0.327304					51.915	17.974	1.00213	1.09607				5.088	39.902	0.0982148	2.43325					50.577	15.484	1.00961	1.12666				2.499	23.474	0.0498848	1.70803
			28.141	8.82	0.844318	0.960353				1.301	1.429	0.0390341	0.155595					46.262	18.464	0.893006	1.12595				3.965	58.459	0.0765373	3.56487					31.756	14.212	0.63391	1.0341				7.746	1.891	0.154625	0.137594
			33.935	8.209	1.01816	0.893825				2.403	21.261	0.0720975	2.31497					51.24	18.556	0.989097	1.13156				1.268	2.448	0.0244765	0.149281					48.423	13.412	0.966615	0.975894				14.156	2.526	0.28258	0.183799
			30.252	9.079	0.907655	0.988554				2.486	36.617	0.0745878	3.98699					53.749	17.375	1.03753	1.05954				4.504	26.801	0.0869417	1.63435					2.073	3.005	0.041381	0.218652				2.05	22.538	0.0409219	1.63993
			35.333	10.289	1.0601	1.1203				3.032	40.422	0.0909695	4.40129					50.713	18.292	0.978925	1.11546				3.083	35.436	0.0595118	2.16091					45.785	13.984	0.913955	1.01751				23.068	3.414	0.460481	0.248412
			35.398	9.305	1.06205	1.01316				2.769	48.107	0.0830787	5.23806					49.532	16.438	0.956127	1.0024				6.481	91.132	0.125104	5.5573					46.6	14.109	0.930224	1.02661				14.516	3.314	0.289767	0.241136
			15.545	12.013	0.466399	1.30802				1.5	0.231	0.0450047	0.0251521					36.9	15.575	0.712289	0.949775				4.562	59.708	0.0880613	3.64104					55.719	13.978	1.11226	1.01708				11.302	2.676	0.225609	0.194713
			31.674	8.532	0.950319	0.928994				2.355	0.906	0.0706574	0.0986485					60.138	17.983	1.16086	1.09662				12.53	38.015	0.241869	2.31818					19.035	9.215	0.379975	0.670508				17.101	2.997	0.341368	0.21807
			30.029	10.039	0.900964	1.09308				2.257	30.062	0.0677171	3.27326					53.794	16.839	1.0384	1.02685				4.559	55.503	0.0880034	3.38461					32.789	11.293	0.65453	0.821709				11.999	2.254	0.239523	0.164007
			14.095	7.543	0.422894	0.821308				2.555	32.699	0.076658	3.56038					45.948	16.173	0.886945	0.986242				8.589	61.155	0.165795	3.72928					39.709	12.297	0.792667	0.894763				12.49	1.956	0.249324	0.142324
			41.519	8.465	1.2457	0.921699				2.469	27.543	0.0740777	2.99898					50.795	19.573	0.980507	1.19358				4.657	71.183	0.0898951	4.34079					39.909	13.362	0.796659	0.972255				15.065	2.211	0.300726	0.160878
			35.858	9.388	1.07585	1.0222				1.878	1.61	0.0563459	0.175302					45.788	17.756	0.883856	1.08277				10.166	48.407	0.196237	2.9519					46.48	13.147	0.927829	0.956611				11.378	2.094	0.227126	0.152365
			28.722	8.016	0.86175	0.87281				1.176	1.588	0.0352837	0.172907					50.996	18.246	0.984387	1.11265				3.522	73.272	0.067986	4.46818					28.257	10.176	0.564063	0.740433				6.73	2.899	0.134344	0.210939
			31.411	9.409	0.942428	1.02449				1.416	2.286	0.0424844	0.248908					55.059	19.176	1.06282	1.16937				4.495	57.654	0.086768	3.51578					21.076	10.964	0.420717	0.79777				16.823	2.875	0.335819	0.209193
			23.919	9.627	0.717645	1.04822				1.469	6.245	0.0440746	0.679978					53.096	19.361	1.02492	1.18065				3.649	27.614	0.0704375	1.68392					29.531	11.472	0.589495	0.834734				15.035	2.88	0.300127	0.209557
			33.317	8.602	0.999614	0.936616				2.571	33.502	0.0771381	3.64782					24.459	13.398	0.472138	0.81702				5.44	57.834	0.10501	3.52676					31.013	13.203	0.619078	0.960686				14.792	2.913	0.295276	0.211958
			37.453	9.602	1.12371	1.0455				2.653	44.206	0.0795983	4.81331					56.396	16.188	1.08862	0.987156				22.257	5.341	0.429632	0.325698					35.33	12.831	0.705254	0.933618				10.549	2.126	0.210578	0.154694
			30.489	9.317	0.914765	1.01447				2.637	45.679	0.0791183	4.97369					54.3	15.458	1.04817	0.94264				3.809	15.434	0.073526	0.941177					55.649	15.816	1.11086	1.15082				13.009	1.996	0.259684	0.145234
			49	9.529	1.47015	1.03755				2.171	34.043	0.0651368	3.70672					4.758	2.673	0.0918448	0.163002				6.602	91.261	0.12744	5.56516					43.394	13.065	0.866226	0.950645				16.154	3.867	0.322464	0.281373
			20.889	8.876	0.626735	0.96645				2.766	43.784	0.0829887	4.76736					51.449	20.906	0.993132	1.27486				11.815	4.537	0.228068	0.27667					5.128	2.836	0.102365	0.206355				11.976	2.251	0.239064	0.163789
			22.254	6.973	0.66769	0.759245				2.546	44.734	0.076388	4.8708					54.404	19.532	1.05017	1.19108				19.73	4.88	0.380853	0.297586					67.445	14.705	1.34633	1.06998				2.765	21.136	0.0551946	1.53791
			34.666	8.914	1.04009	0.970588				2.149	2.02	0.0644767	0.219945					50.016	19.109	0.96547	1.16528				5.043	69.106	0.0973462	4.21414					63.47	15.999	1.26698	1.16413				2.627	20.864	0.0524399	1.51812
			17.975	9.163	0.539306	0.9977				2.558	42.083	0.076748	4.58215					58.936	16.481	1.13765	1.00502				17.246	5.41	0.332903	0.329906					59.68	15.226	1.19133	1.10789				20.277	3.131	0.404767	0.22782
			38.308	10.331	1.14936	1.12488				2.427	38.425	0.0728176	4.18385					19.414	12.049	0.374753	0.734757				18.235	25.389	0.351994	1.54824					35.691	7.956	0.71246	0.5789				2.401	16.681	0.0479285	1.21375
			32.648	8.011	0.979542	0.872266				1.333	4	0.0399942	0.435534					19.583	13.298	0.378015	0.810922				22.067	5.255	0.425964	0.320454					47.309	11.257	0.944377	0.81909				3.394	43.725	0.0677506	3.18155
			30.964	9.096	0.929017	0.990405				2.634	41.645	0.0790282	4.53445					45.901	17.442	0.886037	1.06363				14.893	4.852	0.287483	0.295879					36.46	9.992	0.72781	0.727045				2.821	25.217	0.0563125	1.83486
			36.488	9.202	1.09475	1.00195				1.25	7	0.0375039	0.762185					38.691	16.388	0.746861	0.999353				18.089	5.56	0.349176	0.339053					45.565	9.841	0.909563	0.716058				18.149	3.033	0.362288	0.220689
			27.404	9.139	0.822206	0.995087				1.639	30.043	0.0491751	3.27119					47.287	19.609	0.912792	1.19577				21.531	4.66	0.415618	0.28417					40.233	11.036	0.803127	0.803009				12.304	2.086	0.245611	0.151783
			35.703	9.744	1.0712	1.06096				2.288	23.32	0.0686472	2.53916					52.569	15.958	1.01475	0.973131				21.464	5.748	0.414324	0.350517					39.868	10.289	0.795841	0.748656				4.828	2.087	0.096376	0.151856
			39.849	9.738	1.19559	1.06031				1.365	1.328	0.0409543	0.144597					61.08	19.936	1.17904	1.21571				12.239	4.699	0.236252	0.286549					34.914	10.787	0.696949	0.784891				28.574	3.61	0.570391	0.262673
			41.609	10.6	1.2484	1.15417				2.838	45.445	0.0851489	4.94821					55.47	18.069	1.07075	1.10186				5.259	64.544	0.101516	3.93594					33.431	9.956	0.667346	0.724426				16.592	2.613	0.331208	0.190129
			38.951	10.731	1.16865	1.16843				2.113	26.325	0.0633966	2.86636					65.289	17.459	1.26029	1.06466				7.412	42.134	0.143076	2.56936					3.431	2.918	0.0684892	0.212322				1.939	9.156	0.0387061	0.666215
			7.554	2.388	0.226644	0.260014				3	36.457	0.0900094	3.96957					55.962	18.283	1.08025	1.11491				10.054	43.254	0.194075	2.63766					43.604	11.648	0.870418	0.84754				13.092	2.316	0.261341	0.168518
			44.829	9.993	1.34501	1.08807				6.226	4.024	0.186799	0.438147					47.637	20.043	0.919548	1.22224				23.584	5.471	0.455247	0.333626					40.225	10.681	0.802967	0.777179				3.593	36.917	0.0717231	2.68618
			35.439	10.468	1.06328	1.13979				2.214	40.045	0.0664269	4.36024					53.145	17.061	1.02587	1.04039				14.076	27.893	0.271712	1.70094					45.782	11.248	0.913895	0.818435				8.508	2.014	0.169836	0.146544
			36.298	9.196	1.08905	1.00129				2.799	2.925	0.0839788	0.318484					55.225	16.83	1.06602	1.02631				14.817	5.03	0.286016	0.306733					43.11	10.816	0.860557	0.787002				15.328	2.176	0.305976	0.158332
			28.033	8.012	0.841078	0.872375				2.36	28.614	0.0708074	3.11559					17.391	10.261	0.335702	0.625723				24.479	6.187	0.472524	0.377288					37.637	10.891	0.751306	0.792459				13.155	3.209	0.262599	0.233496
			36.577	13.959	1.09742	1.51991				2.215	31.791	0.0664569	3.46152					71.569	19.185	1.38151	1.16992				23.657	5.511	0.456656	0.336065					38.541	10.607	0.769351	0.771794				13.214	3.189	0.263776	0.23204
			43.838	10.244	1.31528	1.1154				6.335	31.378	0.19007	3.41655					42.714	17.488	0.824518	1.06643				11.378	6.062	0.219632	0.369665					39.185	11.676	0.782207	0.849578				3.16	23.83	0.0630796	1.73394
			32.444	9.63	0.973422	1.04855				2.577	33.401	0.0773181	3.63682					53.718	19.932	1.03693	1.21547				23.719	6.418	0.457853	0.391374					41.916	11.09	0.836723	0.806939				9.086	4.13	0.181374	0.30051
			35.117	9.261	1.05362	1.00837				2.373	34.619	0.0711974	3.76944					72.167	23.249	1.39306	1.41774				23.63	6.009	0.456135	0.366433					4.767	4.115	0.0951583	0.299419				12.063	2.378	0.2408	0.17303
			32.726	8.979	0.981882	0.977665				1.794	3.471	0.0538256	0.377935					58.574	17.855	1.13067	1.08881				16.5	5.539	0.318503	0.337772					48.807	12.722	0.97428	0.925687				8.478	2.027	0.169237	0.14749
			43.102	10.377	1.29319	1.12988				2	1.455	0.0600063	0.158426					48.015	18.066	0.926844	1.10168				29.641	5.961	0.572167	0.363506					41.877	10.608	0.835944	0.771867				6.856	36.348	0.136859	2.64478
			32.906	12.103	0.987283	1.31782				2.462	2.308	0.0738677	0.251303					64.181	21.657	1.2389	1.32066				26.733	6.439	0.516033	0.392655					42.881	10.609	0.855986	0.77194				3.44	31.354	0.0686689	2.2814
			40.898	9.841	1.22707	1.07152				2.896	32.141	0.0868891	3.49963					59.713	20.506	1.15265	1.25047				19.847	5.92	0.383111	0.361006					44.486	12.596	0.888025	0.916519				3.195	35.218	0.0637782	2.56256
			43.344	10.105	1.30046	1.10027				6.818	2.818	0.204561	0.306834					70.61	19.166	1.363	1.16876				36.519	5.907	0.704935	0.360213					33.139	11.344	0.661517	0.82542				2.274	24.277	0.0453933	1.76646
			34.355	11.811	1.03076	1.28602				1.636	2	0.0490851	0.217767					49.423	15.677	0.954023	0.955995				18.213	5.082	0.35157	0.309904					35.003	10.6	0.698726	0.771285				2.875	38.95	0.0573904	2.83411
			38.861	8.36	1.16595	0.910266				5.231	1.385	0.156946	0.150804					43.059	16.748	0.831178	1.02131				10.162	5.308	0.196159	0.323686					49.588	11.937	0.98987	0.868569				16.833	6.392	0.336018	0.465099
			38.755	11.057	1.16277	1.20393				3	2.444	0.0900094	0.266111					68.406	18.539	1.32046	1.13052				12.341	6.748	0.238221	0.411498					42.798	12.555	0.854329	0.913536				2.105	18.983	0.0420198	1.38125
			45.866	10.378	1.37612	1.12999				1.4	3.65	0.0420044	0.397425					62.798	20.35	1.2122	1.24096				6.963	60.114	0.134408	3.6658					28.424	12.253	0.567397	0.891562				15.273	3.217	0.304878	0.234078
			38.027	9.5	1.14093	1.03439				2.355	41.274	0.0706574	4.49406					64.854	17.782	1.25189	1.08436				15.458	8.702	0.298389	0.530654					65.931	13.215	1.31611	0.961559				2.27	40.162	0.0453135	2.9223
			46.891	11.284	1.40688	1.22864				3.871	27.554	0.116142	3.00018					34.114	15.174	0.65851	0.925322				4.555	52.421	0.0879262	3.19667					59.134	13.774	1.18043	1.00223				2.636	12.52	0.0526195	0.910989
			43.218	10.038	1.29668	1.09297				4.098	1.854	0.122953	0.20187					50.256	20.215	0.970103	1.23273				23.126	4.68	0.446406	0.28539					41.852	12.346	0.835445	0.898329				2.989	29.252	0.0596661	2.12846
			37.415	12.287	1.12257	1.33785				2.658	32.959	0.0797483	3.58869					82.489	18.669	1.5923	1.13845				20.638	5.631	0.39838	0.343383					39.552	11.966	0.789533	0.870679				1.209	8.595	0.0241339	0.625396
			23.106	8.126	0.693252	0.884788				2.512	62.19	0.0753679	6.77147					32.777	17.064	0.632702	1.04058				15.769	5.267	0.304393	0.321186					44.245	12.013	0.883214	0.874099				12.228	2.561	0.244094	0.186345
			25.826	10.044	0.774861	1.09363				2.458	45.347	0.0737477	4.93754					36.693	16.52	0.708293	1.0074				35.476	5.786	0.684801	0.352835					45.278	11.775	0.903834	0.856781				2.395	34.488	0.0478087	2.50944
			49.765	10.077	1.49311	1.09722				1.236	2.582	0.0370839	0.281137					56.114	22.605	1.08318	1.37847				5.04	64.673	0.0972883	3.94381					46.757	12.542	0.933358	0.91259				15.581	2.495	0.311026	0.181543
			48.374	10.124	1.45137	1.10234				12.824	2.614	0.38476	0.284622					67.177	19.41	1.29673	1.18364				7.941	2.028	0.153287	0.123669					54.432	13.289	1.08657	0.966944				20.823	2.81	0.415666	0.204463
			39.738	9.782	1.19226	1.0651				1.727	2.364	0.0518154	0.257401					67.026	19.347	1.29382	1.17979				16.276	5.453	0.314179	0.332528					53.159	14.254	1.06115	1.03716				18.898	2.99	0.37724	0.217561
			41.739	9.329	1.2523	1.01577				2.667	4	0.0800184	0.435534					33.709	16.787	0.650692	1.02368				3.892	60.424	0.0751282	3.6847					44.264	13.071	0.883593	0.951082				15.933	2.784	0.318053	0.202571
			40.431	9.745	1.21306	1.06107				2.381	38.317	0.0714375	4.17209					45.019	19.519	0.869012	1.19028				4.29	46.14	0.0828108	2.81365					40.539	12.107	0.809235	0.880938				17.239	2.752	0.344123	0.200243
			47.566	11.873	1.42713	1.29277				13.017	2.761	0.390551	0.300627					63.252	20.684	1.22097	1.26133				18.266	3.567	0.352593	0.217518					20.772	9.735	0.414648	0.708345				16.12	2.72	0.321786	0.197915
			44.4	11.54	1.33214	1.25652				2.137	25.905	0.0641167	2.82063					59.673	20.986	1.15188	1.27974				4.363	52.851	0.08422	3.22289					48.241	14.107	0.962981	1.02646				2.902	28.849	0.0579294	2.09913
			42.031	10.748	1.26106	1.17028				2.698	21.288	0.0809484	2.31791					54.73	17.871	1.05647	1.08979				5.261	62.738	0.101554	3.82581					31.945	11.045	0.637683	0.803664				7.48	2.465	0.149315	0.17936
			41.653	11.673	1.24972	1.271				2.171	18.433	0.0651368	2.00705					67.846	22.23	1.30965	1.3556				6.478	62.281	0.125046	3.79794					52.045	13.831	1.03892	1.00638				15.504	50.855	0.309489	3.70035
			44.511	11.38	1.33547	1.23909				5.354	3.243	0.160637	0.353109					58.747	20.271	1.13401	1.23614				3.735	79.178	0.0720976	4.82833					48.709	12.994	0.972324	0.945479				2.944	32.012	0.0587678	2.32928
			47.825	11.12	1.4349	1.21078				1.477	1.415	0.0443146	0.15407					66.81	23.54	1.28965	1.43549				3.801	36.079	0.0733716	2.20012					57.352	13.428	1.14485	0.977058				3.234	22.889	0.0645567	1.66547
			49.41	12.264	1.48245	1.33535				2.386	29.5	0.0715875	3.21206					77.005	18.837	1.48644	1.14869				8.132	40.082	0.156974	2.44423					55.892	14.067	1.11571	1.02355				10.235	1.864	0.20431	0.13563
			47.122	11.108	1.41381	1.20948				2.453	23.169	0.0735977	2.52272					47.532	18.885	0.917521	1.15162				3.574	58.182	0.0689897	3.54798					51.595	13.533	1.02993	0.984698				6.121	3.607	0.122187	0.262455
			42.735	11.624	1.28218	1.26566				7.4	4.96	0.222023	0.540062					56.583	20.498	1.09223	1.24998				13.806	42.18	0.2665	2.57217					39.204	13.558	0.782586	0.986517				13.38	3.237	0.26709	0.235533
			44.935	12.265	1.34819	1.33546				1.266	1.57	0.037984	0.170947					57.645	19.994	1.11273	1.21925				4.718	82.566	0.0910726	5.03494					43.903	13.481	0.876387	0.980914				3.666	37.002	0.0731803	2.69237
			33.095	9.234	0.992954	1.00543				7.019	4.631	0.210592	0.50424					61.939	20.3	1.19562	1.23791				3.881	17.271	0.0749158	1.0532					49.58	13.119	0.98971	0.954574				12.548	2.184	0.250482	0.158914
			45.555	11.303	1.36679	1.23071				2.625	5.75	0.0787582	0.62608					75.319	19.285	1.4539	1.17601				10.644	3.019	0.205464	0.184101					23.392	10.381	0.466948	0.75535				10.502	1.961	0.20964	0.142688
			44.81	11.297	1.34444	1.23006				1.964	10.692	0.0589262	1.16418					66.891	20.382	1.29121	1.24291				4.075	63.391	0.0786606	3.86563					46.801	14.18	0.934236	1.03178				19.049	3.301	0.380254	0.24019
			48.415	11.845	1.4526	1.28973				1.238	1.383	0.0371439	0.150586					76.183	22.229	1.47058	1.35554				2.783	12.097	0.0537209	0.737684					55.248	13.96	1.10285	1.01577				17.89	2.378	0.357118	0.17303
			41.956	11.086	1.25881	1.20708				2.272	37.754	0.0681671	4.11079					55.749	20.028	1.07614	1.22132				10.104	44.202	0.19504	2.69547					58.446	13.92	1.16669	1.01286				13.603	2.242	0.271542	0.163134
			50.528	12.412	1.516	1.35146				4.539	1.37	0.136184	0.14917					57.006	20.437	1.1004	1.24626				6.669	58.395	0.128733	3.56097					22.842	9.839	0.455969	0.715912				18.215	2.324	0.363606	0.169101
			46.021	12.307	1.38077	1.34003				4.702	1.596	0.141075	0.173778					68.26	18.263	1.31764	1.11369				1.115	1.372	0.0215231	0.0836656					37.297	12.086	0.744519	0.87941				14.023	2.553	0.279926	0.185763
			35.169	10.535	1.05518	1.14709				2.634	18.051	0.0790282	1.96546					69.579	20.405	1.3431	1.24431				3.512	73.312	0.0677929	4.47062					55.088	13.995	1.09966	1.01831				12.732	2.682	0.254155	0.19515
			49.463	11.12	1.48404	1.21078				1.234	1.304	0.0370239	0.141984					86.442	22.115	1.66861	1.34859				3.316	37.663	0.0640095	2.29672					49.358	14.561	0.985279	1.0595				7.825	2.576	0.156202	0.187437
			40.9	12.219	1.22713	1.33045				1.764	30.739	0.0529255	3.34697					75.341	19.648	1.45432	1.19815				4.36	44.868	0.0841621	2.73608					44.02	12.446	0.878722	0.905605				12.777	4.296	0.255053	0.312589
			56.83	12.702	1.70508	1.38304				1.853	28.09	0.0555958	3.05854					70.145	20.475	1.35402	1.24858				5.344	64.187	0.103156	3.91417					44.479	12.092	0.887885	0.879847				11.137	2.124	0.222316	0.154548
			46.84	11.974	1.40535	1.30377				1.937	41.732	0.0581161	4.54393					52.192	15.335	1.00747	0.93514				5.185	59.653	0.100087	3.63768					27.089	9.696	0.540748	0.705507				2.954	21.258	0.0589674	1.54679
			54.231	12.737	1.6271	1.38685				5.289	1.157	0.158687	0.125978					40.667	12.204	0.785004	0.744209				19.49	3.768	0.37622	0.229775					55.18	13.234	1.1015	0.962942				16.385	2.72	0.327076	0.197915
			42.559	13.086	1.2769	1.42485				3.072	31.848	0.0921696	3.46772					45.642	12.862	0.881038	0.784334				20.008	3.875	0.386219	0.2363					53.226	14.55	1.06249	1.0587				20.14	2.577	0.402032	0.18751
			47.652	10.374	1.42971	1.12956				12.184	2.131	0.365558	0.232031					48.995	16.236	0.945762	0.990083				16.212	4.048	0.312944	0.24685					51.078	14.586	1.01961	1.06132				18.744	2.774	0.374166	0.201844
			50.07	11.222	1.50226	1.22189				2.249	31.838	0.067477	3.46663					49.954	15.263	0.964273	0.930749				4.916	37.618	0.0948947	2.29397					59.141	14.334	1.18057	1.04298				16.576	2.54	0.330888	0.184817
			47.103	10.967	1.41324	1.19413				2.534	56.589	0.0760279	6.16161					43.991	12.877	0.849168	0.785249				3.227	43.684	0.0622915	2.66388					57.935	15.732	1.15649	1.1447				12.264	2.073	0.244813	0.150837
			52.668	13.034	1.5802	1.41919				5.937	1.945	0.178129	0.211778					43.103	13.482	0.832027	0.822142				4.908	37.512	0.0947402	2.28751					54.284	13.861	1.08361	1.00856				11.377	2.268	0.227106	0.165026
			55.277	13.676	1.65848	1.48909				1.191	1	0.0357337	0.108884					49.132	14.934	0.948406	0.910687				16.319	3.426	0.315009	0.20892					43.142	12.947	0.861196	0.942059				24.08	1.633	0.480682	0.118822
			56.628	13.718	1.69902	1.49366				3.626	4.14	0.108791	0.450778					41.169	14.091	0.794695	0.85928				3.923	55.698	0.0757266	3.39651					38.813	12.583	0.774781	0.915573				2.692	33.207	0.0537374	2.41623
			53.566	13.172	1.60715	1.43421				1.528	16.835	0.0458448	1.83305					40.004	14.823	0.772206	0.903918				16.736	3.805	0.323059	0.232032					51.973	13.789	1.03748	1.00333				2.813	25.626	0.0561528	1.86462
			44.123	12.093	1.32383	1.31673				1.556	2	0.0466849	0.217767					51.444	18.408	0.993035	1.12253				24.06	4.353	0.464436	0.265449					57.647	14.606	1.15074	1.06277				2.736	35.491	0.0546157	2.58242
			52.981	13.305	1.5896	1.4487				7.667	1.276	0.230034	0.138935					55.484	18.662	1.07102	1.13802				9.08	3.866	0.175273	0.235752					59.951	14.577	1.19674	1.06066				4.529	34.217	0.0904074	2.48972
			50.931	11.455	1.52809	1.24726				0	0	0	0					48.731	14.21	0.940666	0.866536				4.741	69.782	0.0915166	4.25536					59.539	15.676	1.18851	1.14063				3.818	49.256	0.0762145	3.584
			33.7	8.835	1.01111	0.961986				2	0.889	0.0600063	0.0967975					46.139	15.68	0.890632	0.956178				14.148	3.932	0.273102	0.239776					61.454	16.137	1.22674	1.17417				4.132	45.339	0.0824825	3.29899
			40.604	8.822	1.21825	0.96057				2.5	1.167	0.0750078	0.127067					50.419	14.391	0.973249	0.877574				18.032	4.231	0.348076	0.25801					53.276	15.254	1.06349	1.10992				4.324	81.514	0.0863152	5.93118
			37.301	8.989	1.11915	0.978754				1.707	35.428	0.0512153	3.85753					50.931	14.852	0.983133	0.905686				9.879	34.191	0.190697	2.08499					50.899	13.391	1.01604	0.974366				3.484	80.339	0.0695472	5.84568
			36.232	6.902	1.08707	0.751514				1.893	2.369	0.0567959	0.257945					55.574	14.621	1.07276	0.8916				4.758	42.758	0.0918448	2.60741					72.052	14.681	1.43829	1.06823				1.948	13.689	0.0388858	0.996049
			40.23	8.571	1.20703	0.933241				2.161	15.153	0.0648368	1.64991					49.461	14.079	0.954757	0.858548				2.848	28.533	0.0549756	1.73996					58.774	13.548	1.17324	0.985789				3.405	34.72	0.0679702	2.52632
			29.931	8.386	0.898024	0.913097				1.678	2.164	0.0503453	0.235624					56.549	18.793	1.09158	1.14601				2.853	23.748	0.0550721	1.44817					49.342	13.812	0.984959	1.005				3.789	64.663	0.0756356	4.70506
			28.331	9.968	0.850019	1.08535				9.555	1.819	0.28668	0.198059					55.149	19.58	1.06455	1.194				3.516	47.49	0.0678701	2.89598					54.262	14.529	1.08317	1.05717				2.849	68.523	0.0568714	4.98592
			39.055	8.244	1.17177	0.897636				6.902	1.27	0.207082	0.138282					56.873	18.708	1.09783	1.14083				3.898	69.885	0.075244	4.26164					63.312	14.532	1.26383	1.05739				4.088	23.209	0.0816042	1.68875
			41.133	9.757	1.23412	1.06238				8.445	1.668	0.253376	0.181618					46.615	15.586	0.89982	0.950446				4.249	62.156	0.0820194	3.79032					47.435	13.125	0.946892	0.955011				3.923	45.29	0.0783105	3.29542
			39.519	9.58	1.18569	1.0431				1.427	22.693	0.0428145	2.47089					51.639	15.717	0.996799	0.958434				4.518	58.56	0.087212	3.57103					66.055	16.465	1.31858	1.19804				2.751	42.203	0.0549152	3.07081
			41.917	10.46	1.25764	1.13892				1.635	9.634	0.0490551	1.04898					46.122	14.975	0.890303	0.913187				2.492	9.524	0.0481036	0.580781					40.991	11.489	0.818258	0.835971				3.142	52.391	0.0627203	3.81211
			24.776	6.721	0.743358	0.731806				8.429	1.69	0.252896	0.184013					50.719	17.24	0.97904	1.05131				4.709	68.263	0.0908989	4.16273					60.045	14.444	1.19861	1.05098				2.36	30.251	0.0471101	2.20115
			33.671	9.011	1.01024	0.981149				9.398	1.507	0.281969	0.164087					48.53	13.51	0.936786	0.82385				4.829	71.915	0.0932153	4.38543					61.843	14.712	1.2345	1.07049				4.224	37.809	0.084319	2.75109
			42.831	9.819	1.28506	1.06913				0.571	10.286	0.0171318	1.11998					49.01	17.002	0.946051	1.03679				6.648	71.513	0.128328	4.36092					40.079	12.277	0.800053	0.893308				1.507	1.732	0.0300826	0.126025
			39.564	9.357	1.18704	1.01882				1.906	28.018	0.057186	3.0507					56.256	16.09	1.08592	0.98118				5.188	22.006	0.100145	1.34194					59.97	15.279	1.19711	1.11174				3.69	47.653	0.0736594	3.46736
			40.363	10.093	1.21102	1.09896				9.055	3.616	0.271678	0.393723					50.706	16.966	0.978789	1.0346				4.637	68.607	0.0895091	4.18371					64.761	14.999	1.29275	1.09137				2.725	2.434	0.0543961	0.177104
			46.67	9.169	1.40025	0.998353				2.229	40.755	0.066877	4.43755					54.312	18.612	1.0484	1.13497				4.101	41.216	0.0791625	2.51338					65.063	15.971	1.29878	1.16209				4.143	30.287	0.0827021	2.20376
			44.693	11.326	1.34093	1.23321				10.189	2.241	0.305702	0.244008					51.736	15.747	0.998672	0.960264				4.154	52.015	0.0801856	3.17191					58.305	14.63	1.16388	1.06452				3.823	60.222	0.0763143	4.38192
			3.679	3.511	0.110382	0.38229				1.936	30.739	0.0580861	3.34697					52.383	14.972	1.01116	0.913004				23.08	3.971	0.445518	0.242155					62.609	15.168	1.24979	1.10366				2.753	36.933	0.0549551	2.68735
			44.973	10.821	1.34933	1.17823				10.345	1.846	0.310382	0.200999					52.282	18.219	1.00921	1.11101				4.694	69.444	0.0906093	4.23475					57.597	14.345	1.14974	1.04378				3.298	52.157	0.0658343	3.79509
			42.198	9.894	1.26607	1.07729				6.591	2.016	0.197751	0.219509					48.813	16.136	0.942248	0.983985				3.762	54.854	0.0726187	3.34504					51.093	15.856	1.01991	1.15373				4.016	41.957	0.0801669	3.05291
			48.44	10.209	1.45335	1.11159				4.039	23.061	0.121183	2.51096					33.648	13.323	0.649515	0.812447				3.103	31.018	0.0598979	1.8915					50.858	13.485	1.01522	0.981205				4.262	59.829	0.0850776	4.35332
			46.195	10.271	1.38599	1.11834				1.266	14.925	0.037984	1.62509					45.715	15.944	0.882447	0.972277				7.267	49.296	0.140277	3.00611					61.187	14.825	1.22141	1.07871				3.426	45.246	0.0683894	3.29222
			44.124	10.73	1.32386	1.16832				4.704	1.864	0.141135	0.202959					51.699	14.705	0.997958	0.896722				6.061	63.438	0.116997	3.8685					55.933	14.007	1.11653	1.01919				3.245	56.243	0.0647763	4.09239
			47.313	10.294	1.41954	1.12085				9.044	2.114	0.271348	0.23018					47.145	16.368	0.910051	0.998133				4.181	45.776	0.0807068	2.79145					63.35	14.672	1.26459	1.06757				12.793	13.907	0.255372	1.01191
			44.038	11.497	1.32128	1.25183				7.361	1.957	0.220853	0.213085					58.711	19.164	1.13331	1.16864				5.545	58.472	0.107036	3.56567					56.383	14.79	1.12551	1.07616				4.599	50.442	0.0918047	3.6703
			51.407	10.179	1.54237	1.10833				10.691	1.732	0.320763	0.188586					49.696	14.083	0.959293	0.858792				6.555	79.527	0.126533	4.84962					56.911	15.4	1.13605	1.12055				3.236	47.357	0.0645967	3.44582
			30.396	9.255	0.911975	1.00772				11.673	2.248	0.350227	0.24477					57.325	18.466	1.10656	1.12607				3.459	37.622	0.0667699	2.29422					56.318	16.404	1.12421	1.1936				1.895	9.082	0.0378278	0.660831
			41.336	10.229	1.24021	1.11377				5.247	1.507	0.157426	0.164087					50.031	14.659	0.96576	0.893917				3.971	48.381	0.0766531	2.95031					16.23	5.574	0.323981	0.405579				3.696	42.392	0.0737791	3.08456
			44.628	11.32	1.33898	1.23256				1.959	33.913	0.0587761	3.69257					43.929	16.355	0.847971	0.99734				6.171	64.597	0.11912	3.93917					57.709	14.682	1.15198	1.0683				5.308	54.536	0.105958	3.96819
			43.722	10.556	1.3118	1.14937				9.069	2.202	0.272098	0.239762					56.803	16.147	1.09648	0.984656				3.572	11.007	0.0689511	0.671215					53.544	13.302	1.06884	0.96789				3.336	31.273	0.0665929	2.27551
			51.281	12.124	1.53859	1.3201				1.867	14.638	0.0560158	1.59384					54.842	17.875	1.05863	1.09003				6.427	95.69	0.124062	5.83525					57.191	15.168	1.14164	1.10366				5.567	77.083	0.111128	5.60877
			45.622	11.31	1.3688	1.23147				1.471	30.747	0.0441346	3.34784					64.167	15.578	1.23863	0.949958				4.78	74.95	0.0922694	4.57051					62.029	15.112	1.23822	1.09959				3.791	27.309	0.0756755	1.98708
			41.443	12.302	1.24342	1.33949				2.001	31.717	0.0600363	3.45346					64.776	20.213	1.25039	1.2326				5.726	90.822	0.11053	5.53839					41.246	10.035	0.823348	0.730174				4.6	47.85	0.0918247	3.4817
			46.999	11.204	1.41012	1.21993				8.264	7.157	0.247946	0.779279					55.597	17.802	1.0732	1.08558				25.51	5.908	0.492425	0.360274					55.84	12.037	1.11467	0.875845				4.419	56.265	0.0882116	4.09399
			42.09	11.37	1.26283	1.23801				3.753	2.501	0.112602	0.272318					57.388	18.043	1.10777	1.10028				3.051	20.478	0.0588941	1.24876					43.615	10.924	0.870638	0.79486				20.064	2.991	0.400515	0.217633
			49.706	12.986	1.49134	1.41396				7.218	2.268	0.216563	0.246948					48.317	15.483	0.932674	0.944165				5.971	72.69	0.11526	4.43269					41.995	10.835	0.838299	0.788384				2.742	35.994	0.0547355	2.61902
			48.366	12.238	1.45113	1.33252				5.815	20.304	0.174468	2.21077					56.608	18.133	1.09272	1.10576				4.726	55.98	0.0912271	3.4137					39.736	7.036	0.793206	0.511958				3.653	41.608	0.0729208	3.02751
			43.537	12.267	1.30625	1.33567				2.895	32.663	0.0868591	3.55646					51.597	16.807	0.995989	1.0249				5.016	62.923	0.096825	3.83709					56.117	12.03	1.1202	0.875336				11.459	77.408	0.228743	5.63242
			39.253	11.201	1.17771	1.2196				1.361	16.385	0.0408343	1.78406					63.64	17.889	1.22846	1.09088				19.58	6.043	0.377957	0.368507					45.268	11.021	0.903635	0.801918				1.658	1.618	0.0330968	0.11773
			45.5	11.453	1.36514	1.24704				10	2.114	0.300031	0.23018					58.769	20.377	1.13443	1.2426				3.666	45.356	0.0707656	2.76584					39.534	9.036	0.789173	0.657484				3.446	48.595	0.0687887	3.5359
			46.381	12.817	1.39158	1.39556				4.026	23.394	0.120793	2.54722					44.148	14.959	0.852199	0.912211				29.726	5.156	0.573808	0.314417					39.471	10.956	0.787916	0.797188				17.104	2.994	0.341428	0.217852
			52.602	12.213	1.57822	1.32979				9.873	1.849	0.296221	0.201326					47.338	18.669	0.913776	1.13845				4.453	64.635	0.0859573	3.94149					42.524	10.841	0.848859	0.788821				3.356	35.856	0.0669921	2.60898
			45.743	12.204	1.37243	1.32881				1.329	1.543	0.0398742	0.168007					38.609	15.723	0.745278	0.9588				24.373	5.166	0.470478	0.315027					43.22	10.907	0.862753	0.793623				2.961	44.259	0.0591072	3.22041
			37.776	11.067	1.1334	1.20501				4.331	9.774	0.129944	1.06423					43.219	17.327	0.834266	1.05661				4.883	60.21	0.0942577	3.67165					37.585	11.036	0.750268	0.803009				20.439	3.594	0.408001	0.261509
			38.251	11.88	1.14765	1.29354				1.048	7.05	0.0314433	0.767629					47.136	19.523	0.909877	1.19053				5.45	51.36	0.105203	3.13197					27.491	9.612	0.548772	0.699395				4.858	51.03	0.0969749	3.71308
			38.043	12.607	1.14141	1.37269				2.029	17.618	0.0608764	1.91831					54.354	16.939	1.04921	1.03295				5.136	18.663	0.0991414	1.13808					48.887	12.475	0.975877	0.907715				5.279	64.177	0.105379	4.66969
			37.344	10.856	1.12044	1.18204				9.278	2.431	0.278369	0.264696					50.534	16.087	0.975469	0.980997				4.455	61.107	0.0859959	3.72635					48.558	11.752	0.969309	0.855107				4.436	75.432	0.0885509	5.48864
			34.692	10.503	1.04087	1.1436				7.129	1.976	0.213892	0.215154					50.863	14.646	0.98182	0.893124				19.277	5.902	0.372108	0.359908					43.022	12.513	0.8588	0.91048				4.79	79.843	0.0956174	5.80959
			35.538	11.139	1.06625	1.21285				2.06	31.487	0.0618065	3.42842					63.203	19.648	1.22002	1.19815				35.078	5.902	0.677119	0.359908					44.617	9.925	0.89064	0.72217				5.07	73.407	0.101207	5.34129
			39.526	12.832	1.1859	1.39719				5.042	20.042	0.151276	2.18224					45.986	16.999	0.887678	1.03661				30.067	5.247	0.58039	0.319966					45.149	11.525	0.901259	0.83859				4.006	55.23	0.0799673	4.01869
			42.78	11.051	1.28353	1.20327				15	3.091	0.450047	0.336559					35.503	13.396	0.685322	0.816898				9.457	104.619	0.182551	6.37975					44.7	10.333	0.892296	0.751857				5.257	88.784	0.10494	6.46017
			31.15	10.564	0.934598	1.15025				1.896	37.387	0.0568859	4.07083					65.804	17.495	1.27023	1.06686				5.009	69.126	0.0966899	4.21536					17.718	8.32	0.353685	0.605386				7.366	45.189	0.147039	3.28807
			37.444	11.109	1.12344	1.20959				11.888	2.454	0.356677	0.2672					63.036	21.146	1.2168	1.2895				5.096	51.048	0.0983692	3.11295					45.409	11.647	0.906449	0.847467				3.205	70.168	0.0639779	5.10561
			26.77	9.029	0.803184	0.983109				2.26	40.731	0.0678071	4.43493					50.845	17.029	0.981473	1.03844				16.014	2.519	0.309122	0.153611					17.978	4.94	0.358875	0.359448				25.112	3.317	0.501283	0.241354
			23.423	9.225	0.702763	1.00445				11.794	2.553	0.353857	0.27798					54.434	19.514	1.05075	1.18998				4.388	33.85	0.0847026	2.0642					44.788	11.813	0.894053	0.859546				27.602	3.097	0.550988	0.225346
			28.932	9.973	0.868051	1.0859				12.628	2.419	0.37888	0.263389					51.105	17.11	0.986491	1.04338				3.85	54.938	0.0743174	3.35016					42.501	12.325	0.8484	0.896801				3.929	86.104	0.0784303	6.26516
			20.644	8.321	0.619385	0.90602				7.549	1.9	0.226494	0.206879					51.304	17.967	0.990333	1.09564				2.962	50.53	0.0571762	3.08136					50.753	12.725	1.01313	0.925906				30.75	4.219	0.613828	0.306986
			19.615	8.977	0.588511	0.977447				1.121	3.233	0.0336335	0.35202					58.475	19.54	1.12876	1.19156				5.199	70.861	0.100357	4.32116					45.058	11.245	0.899443	0.818217				31.242	3.959	0.623649	0.288068
			19.308	7.823	0.5793	0.851796				14.327	2.276	0.429855	0.247819					51.092	16.33	0.98624	0.995816				2.453	26.002	0.0473508	1.58562					41.596	11.768	0.830335	0.856272				4.814	66.294	0.0960965	4.82373
			30.562	9.402	0.916956	1.02372				1.257	15.541	0.0377139	1.69216					64.569	20.309	1.24639	1.23846				3.226	46.539	0.0622722	2.83798					40.942	13.035	0.81728	0.948462				5.608	81.146	0.111946	5.9044
			20.891	8.219	0.626795	0.894914				7.885	1.924	0.236575	0.209492					23.767	15.153	0.45878	0.924041				16.38	4.252	0.316187	0.25929					45.774	12.183	0.913735	0.886468				3.142	57.893	0.0627203	4.21245
			24.926	9.698	0.747858	1.05595				8.25	1.977	0.247526	0.215263					49.754	15.665	0.960413	0.955263				2.964	26.324	0.0572148	1.60526					31.53	10.132	0.629398	0.737232				4.388	75.06	0.0875928	5.46157
			19.262	7.85	0.57792	0.854736				1.953	19.925	0.0585961	2.1695					59.106	17.48	1.14094	1.06594				3.388	45.219	0.0653993	2.75749					49.262	12.609	0.983363	0.917465				19.952	3.851	0.39828	0.280209
			14.289	9.026	0.428715	0.982783				3.783	1.391	0.113502	0.151457					67.756	20.411	1.30791	1.24468				14.466	2.5	0.27924	0.152452					46.294	10.641	0.924116	0.774268				4.664	96.621	0.0931022	7.03041
			21.472	7.87	0.644227	0.856913				6.271	1.583	0.18815	0.172363					61.13	18.969	1.18001	1.15674				4.145	74.533	0.0800119	4.54508					47.348	11.636	0.945155	0.846667				4.977	71.343	0.0993503	5.19111
			13.984	6.254	0.419564	0.680958				5.405	2.379	0.162167	0.259034					54.479	19.943	1.05162	1.21614				4.811	73.507	0.0928678	4.48251					39.332	12.102	0.785141	0.880574				5.053	68.614	0.100867	4.99254
			21.199	8.586	0.636036	0.934874				7.59	1.546	0.227724	0.168334					56.521	21.346	1.09104	1.3017				4.39	70.104	0.0847412	4.27499					37.969	11.256	0.757933	0.819017				4.778	71.225	0.0953779	5.18252
			34.419	8.238	1.03268	0.896982				5.492	7.598	0.164777	0.827297					66.96	21.681	1.29254	1.32212				3.785	48.813	0.0730627	2.97665					44.824	11.439	0.894772	0.832333				3.857	43.432	0.076993	3.16023
			37.31	8.421	1.11942	0.916908				10.88	2.277	0.326434	0.247928					67.337	22.319	1.29982	1.36103				3.446	39.67	0.0665189	2.41911					48.226	13.41	0.962682	0.975748				7.775	70.265	0.155204	5.11267
			10.911	8.273	0.327364	0.900793				5.778	1.898	0.173358	0.206661					62.726	22.479	1.21081	1.37079				3.701	29.432	0.0714412	1.79479					50.984	11.477	1.01774	0.835098				3.985	49.628	0.0795481	3.61107
			35.433	7.708	1.0631	0.839274				2.169	1.525	0.0650768	0.166047					43.2	14.294	0.833899	0.871659				3.764	37.705	0.0726573	2.29928					55.011	13.656	1.09812	0.993648				27.464	3.271	0.548233	0.238007
			45.688	7.886	1.37078	0.858655				0.736	2.253	0.0220823	0.245315					45.383	15.522	0.876038	0.946543				20.047	2.767	0.386972	0.168734					29.272	11.742	0.584324	0.85438				19.119	2.964	0.381651	0.215669
			37.533	8.925	1.12611	0.971785				7.506	1.474	0.225204	0.160494					44.613	13.042	0.861175	0.795311				3.865	55.77	0.074607	3.4009					45.729	12.369	0.912837	0.900002				3.915	64.504	0.0781508	4.69349
			43.51	9.402	1.30544	1.02372				6.796	1.736	0.203901	0.189022					45.215	14.884	0.872795	0.907637				5.483	49.869	0.10584	3.04105					51.207	12.983	1.02219	0.944678				26.986	3.641	0.538692	0.264929
			32.135	9.906	0.964151	1.0786				5.088	1.953	0.152656	0.21265					51.024	16.157	0.984928	0.985266				6.671	45.995	0.128772	2.80481					48.184	11.199	0.961844	0.81487				4.399	71.378	0.0878123	5.19366
			34.636	10.865	1.03919	1.18302				9.548	2.031	0.28647	0.221142					43.74	14.065	0.844323	0.857694				21.809	3.601	0.420984	0.219592					48.356	13.854	0.965277	1.00805				6.089	99.541	0.121548	7.24287
			35.974	10.95	1.07933	1.19227				7.873	1.729	0.236215	0.18826					50.102	14.674	0.96713	0.894832				4.315	60.495	0.0832934	3.68903					50.46	13.802	1.00728	1.00427				3.682	66.821	0.0734997	4.86208
			37.626	10.471	1.1289	1.14012				6.601	1.531	0.198051	0.166701					46.038	13.509	0.888682	0.823789				2.851	34.862	0.0550335	2.12591					57.17	14.394	1.14122	1.04735				4.438	73.937	0.0885909	5.37986
			44.487	10.661	1.33475	1.16081				4.847	1.322	0.145425	0.143944					49.123	14.784	0.948232	0.901539				4.908	88.062	0.0947402	5.37009					49.586	12.457	0.98983	0.906405				3.582	44.122	0.0715035	3.21044
			41.268	10.167	1.23817	1.10702				2.01	1.649	0.0603063	0.179549					41.322	11.652	0.797648	0.710548				4.396	46.762	0.084857	2.85158					57.243	14.847	1.14268	1.08031				6.494	53.316	0.129633	3.87942
			38.539	11.125	1.15629	1.21133				2.424	29.338	0.0727276	3.19442					44.547	13.763	0.859901	0.839278				4.741	61.446	0.0915166	3.74702					22.888	10.625	0.456888	0.773104				4.047	70.027	0.0807858	5.09535
			41.933	9.48	1.25812	1.03222				2.678	20.829	0.0803484	2.26793					38.851	13.775	0.74995	0.84001				3.858	43.418	0.0744718	2.64766					60.888	12.712	1.21544	0.92496				8.156	54.064	0.162809	3.93384
			31.16	10.04	0.934898	1.09319				3.154	0.769	0.0946299	0.0837314					40.951	13.724	0.790486	0.8369				4.429	50.935	0.085494	3.10605					22.772	12.177	0.454572	0.886032				3.31	101.903	0.0660739	7.41474
			38.857	8.062	1.16583	0.877819				1.403	19.738	0.0420944	2.14914					20.675	10.228	0.399094	0.623711				3.811	38.756	0.0735646	2.36337					31.729	15.53	0.633371	1.13001				5.386	92.923	0.107515	6.76133
			46.232	9.623	1.3871	1.04779				1.5	1.5	0.0450047	0.163325					53.299	14.592	1.02884	0.889831				26.452	3.038	0.510609	0.18526					37.097	12.502	0.740526	0.90968				4.602	75.849	0.0918646	5.51898
			40.288	11.156	1.20877	1.2147				1.531	36.414	0.0459348	3.96488					19.784	9.777	0.381895	0.596209				3.661	31.989	0.0706691	1.95071					55.01	14.431	1.0981	1.05004				5.441	85.435	0.108613	6.21648
			37.638	10.447	1.12926	1.13751				0.835	1.13	0.0250526	0.123038					47.458	14.964	0.916093	0.912516				2.609	27.053	0.0503621	1.64971					52.175	17.034	1.04151	1.23944				4.923	91.765	0.0982724	6.67707
			38.863	10.979	1.16601	1.19543				1.298	10.632	0.0389441	1.15765					50.239	14.545	0.969775	0.886965				6.251	34.674	0.120664	2.11445					42.03	12.192	0.838998	0.887123				5.841	81.037	0.116597	5.89647
			45.931	11.184	1.37807	1.21775				3.435	1.13	0.103061	0.123038					47.594	14.828	0.918718	0.904223				3.511	41.138	0.0677736	2.50863					47.072	13.414	0.939646	0.976039				4.512	89.433	0.090068	6.50739
			41.694	10.646	1.25095	1.15917				2.338	1.575	0.0701473	0.171492					37.24	14.235	0.718852	0.868061				4.717	54.819	0.0910533	3.3429					57.534	15.87	1.14849	1.15474				13.915	4.101	0.27777	0.2984
[truncated: 1,021 more rows]

## Sheet: F1F2K
qPCR Analysis of endoderm and pluripotency markers in H9 hPSCs and hPSCs treated with ACL
Units = relative increase (=POWER(2,ΔΔCt)
[truncated: 35 more rows]
