# Supplementary material for: An in vitro stem cell model of human epiblast and yolk sac interaction
Source: eLife. 2021 Aug 17;10:e63930. doi: 10.7554/eLife.63930 (PMC8370770; doi:10.7554/eLife.63930)
Supplement: Figure 1—figure supplement 3—source data 1. [file elife-63930-fig1-figsupp3-data1.xlsx]

## Sheet: F1FS3B
Flourescence intensity analysis of SOX2 and SOX17 in RUES2 Rset hPSCs treated with ACL for 2 weeks and 1 month
Units =arbitrary units (a.u.)
	Exp 1								Exp 1								Exp 1								Exp 2		37.6765	2.80005	1	1			Exp 2								Exp 2								Exp 3
	Control	Average flourescence intensity (A.U.)	43.5583	3.72897	1	1			2 weeks	Average flourescence intensity (A.U.)	3.87094	16.7542	0.088868	4.49299			1 Month	Average flourescence intensity (A.U.)	4.07793	29.5043	0.09362	7.91218			Control	Average flourescence intensity (A.U.)							2 weeks	Average flourescence intensity (A.U.)	6.14833	13.7194	0.101826	3.72203			1 Month	Average flourescence intensity (A.U.)	5.2654	13.9992	0.139753	4.99962			Control
			SOX2	SOX17	rel SOX2	rel SOX17					SOX2	SOX17	rel SOX2	rel SOX17					SOX2	SOX17	rel SOX2	rel SOX17					SOX2	SOX17	rel SOX2	rel SOX17					SOX2	SOX17	rel SOX2	rel SOX17					SOX2	SOX17	rel SOX2	rel SOX17
			40.115	2.571	0.92095	0.689466					1.724	6.247	0.0395791	1.67526					3.423	16.657	0.0785843	4.46691					60.381	3.686	1.60262	1.3164					0.86	17.785	0.0142429	4.82501					1.404	24.274	0.0372646	8.66912
			39.215	2.542	0.900288	0.681689					11.021	11.115	0.253017	2.98071					1.027	32.177	0.0235776	8.62892					47.025	3.293	1.24813	1.17605					2.423	15.667	0.0401285	4.25041					1.136	29.646	0.0301514	10.5877
			40.409	3.216	0.927699	0.862436					0.12	12.234	0.00275493	3.2808					9.055	11.187	0.207882	3.00002					45.57	2.8	1.20951	0.99998					0.347	15.464	0.00574684	4.19533					0.516	28.849	0.0136956	10.303
			31.112	4.266	0.714261	1.14401					9.743	18.331	0.223677	4.91583					0.587	23.785	0.0134762	6.37843					53.121	2.73	1.40993	0.974981					0.339	28.476	0.00561435	7.72545					0.63	41.182	0.0167213	14.7076
			40.554	2.806	0.931028	0.752486					0.186	24.318	0.00427014	6.52137					2.027	29.483	0.0465353	7.90647					41.309	3.406	1.09641	1.2164					0.274	21.211	0.00453785	5.75448					0.524	36.757	0.0139079	13.1272
			32.725	2.667	0.751292	0.71521					0.151	15.591	0.00346662	4.18104					2.441	35.652	0.0560398	9.56081					46.451	2.543	1.23289	0.908197					8.578	12.754	0.142065	3.46012					5.999	17	0.159224	6.07131
			50.147	2.727	1.15126	0.7313					0.133	26.643	0.00305338	7.14486					38.752	19.875	0.889658	5.32988					46.129	3.183	1.22435	1.13676					0.421	23.866	0.00697239	6.47477					7.437	22.182	0.197391	7.92199
			37.595	2.914	0.863096	0.781448					6.772	13.194	0.15547	3.53824					2.073	11.917	0.0475914	3.19579					67.624	3.15	1.79486	1.12498					0.199	12.21	0.00329574	3.31253					1.141	31.67	0.0302842	11.3105
			41.426	2.952	0.951047	0.791639					2.537	8.118	0.0582438	2.17701					0.349	3.661	0.00801225	0.981771					43.617	3.035	1.15767	1.08391					0.341	34.588	0.00564747	9.38361					0.589	23.056	0.0156331	8.23412
			28.504	5.271	0.654387	1.41353					0.184	15.745	0.00422422	4.22234					0.458	9.205	0.0105146	2.46851					38.97	2.299	1.03433	0.821055					8.921	5.208	0.147745	1.41291					0.634	24.874	0.0168275	8.8834
			24.106	2.851	0.553419	0.764554					0.226	23.657	0.00518845	6.3441					21.697	3.598	0.498114	0.964877					50.195	2.818	1.33226	1.00641					0.275	22.619	0.00455441	6.13646					2.84	4.571	0.0753786	1.63247
			41.478	3.215	0.952241	0.862168					0.988	14.139	0.0226822	3.79166					36.059	13.49	0.827833	3.61762					61.844	3.171	1.64145	1.13248					0.31	22.19	0.00513407	6.02008					1.064	15.834	0.0282404	5.65489
			40.906	3.055	0.939109	0.81926					0.096	24.47	0.00220394	6.56213					0.897	25.013	0.0205931	6.70774					45.513	2.554	1.208	0.912125					13.557	9.95	0.224524	2.6994					0.858	21.323	0.0227728	7.61521
			44.399	3.217	1.0193	0.862704					6.041	5.706	0.138688	1.53018					44.654	2	1.02515	0.536341					60.05	3.533	1.59383	1.26176					0.292	27.591	0.00483596	7.48535					2.055	21.506	0.0545433	7.68056
			37.264	2.98	0.855497	0.799148					28.135	10.759	0.645916	2.88524					1.944	7.22	0.0446298	1.93619					44.561	3.365	1.18273	1.20176					20.688	8.998	0.342624	2.44113					0.859	17.916	0.0227994	6.39845
			10.892	27.573	0.250056	7.39426					0.272	23.657	0.0062445	6.3441					3.783	8.122	0.0868491	2.17808					46.03	2.278	1.22172	0.813556					5.95	11.441	0.0985409	3.10391					2.363	25.097	0.0627182	8.96304
			40.406	2.866	0.92763	0.768576					1.329	17.952	0.0305108	4.81419					1.592	6.885	0.0365487	1.84635					43.115	2.874	1.14435	1.02641					0.245	34.244	0.00405757	9.29029					0.81	26.033	0.0214988	9.29732
			29.824	7.489	0.684692	2.00833					46.895	7.231	1.0766	1.93914					35.723	3.038	0.820119	0.814701					59.747	3.036	1.58579	1.08426					0.368	23.566	0.00609463	6.39338					6.453	3.832	0.171274	1.36854
			27.803	6.714	0.638294	1.8005					0.367	10.109	0.00842549	2.71093					4.241	5.047	0.0973638	1.35346					62.017	3.806	1.64604	1.35926					0.192	16.351	0.00317981	4.43597					0.818	26.613	0.0217112	9.50446
			27.744	2.707	0.636939	0.725937					24.393	6.247	0.560008	1.67526					1.548	25.71	0.0355386	6.89466					46.839	2.652	1.24319	0.947124					0.312	17.593	0.00516719	4.77292					0.562	25.162	0.0149165	8.98625
			44.123	2.742	1.01296	0.735323					62.489	6.937	1.43461	1.8603					3.335	5.051	0.0765641	1.35453					44.593	3.195	1.18358	1.14105					0.729	8.696	0.0120733	2.3592					1.856	23.29	0.0492615	8.31769
			38.708	3.207	0.888648	0.860022					34.809	2.225	0.799136	0.596679					40.086	2.744	0.920284	0.735859					64.631	3.691	1.71542	1.31819					19.191	16.74	0.317832	4.54151					0.576	11.768	0.0152881	4.20278
			53.834	3.22	1.23591	0.863508					50.626	3.309	1.16226	0.887376					8.767	6.984	0.20127	1.8729					54.82	3.516	1.45502	1.25569					0.16	14.833	0.00264984	4.02415					1.675	23.488	0.0444575	8.38841
			39.953	2.71	0.917231	0.726742					0.199	29.79	0.00456859	7.98879					38.467	3.096	0.883115	0.830255					48.82	2.411	1.29577	0.861055					17.069	12.714	0.282688	3.44927					22.804	4.243	0.605258	1.51533
			35.513	3.061	0.815298	0.820869					0.202	18.001	0.00463746	4.82733					40.348	2.915	0.926299	0.781716					35.228	2.425	0.935013	0.866055					0.202	24.392	0.00334542	6.61747					0.568	10.947	0.0150757	3.90957
			17.679	33.16	0.40587	8.89253					0.201	27.208	0.00461451	7.29638					0.917	27.244	0.0210522	7.30603					64.118	3.183	1.70181	1.13676					22.516	7.722	0.372899	2.09495					5.788	25.771	0.153624	9.20375
			35.761	3.253	0.820992	0.872358					11.89	5.033	0.272968	1.3497					0.398	3.616	0.00913718	0.969704					42.309	2.518	1.12296	0.899268					0.22	19.74	0.00364353	5.3554					33.085	4.448	0.878134	1.58854
			22.908	3.569	0.525916	0.9571					0.351	16.277	0.00805817	4.36501					8.301	7.391	0.190572	1.98205					44.379	2.708	1.1779	0.967124					0.171	6.414	0.00283202	1.7401					14.165	3.887	0.375964	1.38819
			49.027	5.122	1.12555	1.37357					0.146	14.352	0.00335183	3.84878					3.428	15.641	0.0786991	4.19445					43.557	2.239	1.15608	0.799627					0.206	7.905	0.00341167	2.1446					37.378	4.079	0.992078	1.45676
			12.313	31.515	0.282679	8.45139					0.619	9.883	0.0142108	2.65033					35.833	2.314	0.822645	0.620546					48.272	3.385	1.28122	1.2089					0.992	4.845	0.016429	1.31443					0.488	17.88	0.0129524	6.38559
			36.761	2.992	0.843949	0.802366					0.242	20.669	0.00555577	5.54281					3.095	7.978	0.0710542	2.13946					54.337	2.964	1.4422	1.05855					0.23	16.317	0.00380915	4.42675					0.552	21.976	0.0146511	7.84842
			47.746	3.777	1.09614	1.01288					1.081	12.525	0.0248173	3.35883					24.866	9.82	0.570867	2.63343					50.024	2.38	1.32773	0.849983					14.234	9.59	0.235736	2.60174					1.828	17.828	0.0485184	6.36702
			52.186	3.062	1.19807	0.821137					0.188	1.591	0.00431605	0.426659					43.761	2.067	1.00465	0.554308					41.282	2.302	1.0957	0.822127					0.21	15.623	0.00347792	4.23847					24.185	4.128	0.641913	1.47426
			36.56	3.214	0.839335	0.861899					24.914	2.657	0.571969	0.712528					10.119	22.987	0.232309	6.16443					34.694	2.951	0.92084	1.05391					12.49	5.564	0.206853	1.5095					0.787	24.265	0.0208884	8.6659
			39.167	3.271	0.899186	0.877185					0.381	11.454	0.0087469	3.07162					8.446	4.061	0.193901	1.08904					53.074	3.092	1.40868	1.10426					0.052	7.563	0.000861198	2.05182					0.525	28.261	0.0139344	10.093
			38.524	3.079	0.884424	0.825696					1.765	5.156	0.0405204	1.38269					11.921	2.722	0.273679	0.72996					47.967	2.971	1.27313	1.06105					0.272	22.582	0.00450473	6.12642					10.982	22.393	0.291482	7.99734
			45.944	3.575	1.05477	0.958709					0.104	18.728	0.0023876	5.02229					31.15	2.388	0.715134	0.640391					39.286	2.823	1.04272	1.00819					0.104	15.512	0.0017224	4.20836					32.061	3.778	0.850956	1.34926
			38.575	3.822	0.885595	1.02495					0.167	6.589	0.00383394	1.76697					34.034	2.851	0.781344	0.764554					23.18	3.255	0.615238	1.16248					0.195	14.756	0.00322949	4.00326					7.119	3.815	0.188951	1.36247
			24.772	2.939	0.568709	0.788153					0.173	16.479	0.00397169	4.41918					17.139	2.099	0.393473	0.562889					42.774	2.835	1.1353	1.01248					0.201	18.553	0.00332886	5.03337					39.682	4.452	1.05323	1.58997
			43.715	3.542	1.0036	0.949859					0.845	11.912	0.0193993	3.19444					14.865	3.129	0.341267	0.839105					39.78	2.944	1.05583	1.05141					4.798	2.472	0.0794621	0.670646					8.034	4.308	0.213237	1.53854
			36.205	2.878	0.831185	0.771794					0.248	21.829	0.00569352	5.85389					23.064	2.411	0.529497	0.646559					37.131	2.637	0.985522	0.941767					0.251	11.435	0.00415694	3.10228					8.545	19.797	0.226799	7.07022
			42.291	3.259	0.970906	0.873967					0.164	22.164	0.00376507	5.94373					3.154	18.351	0.0724087	4.92119					47.661	2.978	1.26501	1.06355					0.155	14.065	0.00256703	3.81579					0.885	22.983	0.0234895	8.20805
			45.138	3.574	1.03627	0.958441					0.171	9.595	0.00392577	2.57309					40.168	2.627	0.922166	0.704483					49.141	3.087	1.30429	1.10248					3.316	11.17	0.0549179	3.03039					1.397	13.188	0.0370788	4.70991
			41.213	3.413	0.946157	0.915265					3.067	6.744	0.0704114	1.80854					19.803	2.781	0.454632	0.745782					44.84	3.457	1.19013	1.23462					0.166	6.278	0.00274921	1.7032					1.797	26.541	0.0476956	9.47874
			51.674	3.275	1.18632	0.878258					0.114	10.729	0.00261718	2.8772					23.589	2.631	0.54155	0.705556					46.823	2.925	1.24277	1.04462					0.165	10.279	0.00273265	2.78866					5.819	15.234	0.154447	5.44061
			49.395	3.815	1.134	1.02307					3.735	1.636	0.0857472	0.438727					3.235	7.677	0.0742683	2.05874					60.048	2.888	1.59378	1.03141					0.198	2.469	0.00327918	0.669832					0.502	35.691	0.013324	12.7465
			44.067	3.393	1.01168	0.909902					0.191	7.086	0.00438493	1.90025					3.657	15.991	0.0839564	4.28831					21.358	3.156	0.566879	1.12712					7.555	3.423	0.125122	0.928649					0.612	17.891	0.0162436	6.38952
			21.84	2.474	0.501397	0.663453					12.615	2.128	0.289612	0.570666					22.453	3.071	0.51547	0.823551					42.506	2.509	1.12818	0.896054					9.218	2.389	0.152664	0.648128					1.483	24.892	0.0393614	8.88983
			53.983	3.709	1.23933	0.994644					0.46	19.249	0.0105606	5.16201					20.376	3.077	0.467787	0.82516					39.171	2.698	1.03967	0.963553					0.147	1.225	0.00243454	0.332339					3.602	5.009	0.0956034	1.78889
			39.544	2.86	0.907841	0.766967					21.192	2.575	0.48652	0.690539					0.881	26.742	0.0202258	7.17141					53.603	3.277	1.42272	1.17033					8.938	4.826	0.148027	1.30928					13.952	4.374	0.370311	1.56211
			39.159	4.183	0.899002	1.12176					0.143	23.134	0.00328296	6.20385					0.554	3.057	0.0127186	0.819797					37.638	3.096	0.998979	1.10569					14.408	5.564	0.238618	1.5095					28.038	5.348	0.744178	1.90996
			38.3	3.568	0.879281	0.956832					0.104	16.478	0.0023876	4.41891					3.805	23.178	0.0873542	6.21565					43.536	2.316	1.15552	0.827127					0.728	3.279	0.0120568	0.889582					15.274	3.467	0.405399	1.23819
			41.632	4.122	0.955777	1.1054					0.145	19.773	0.00332887	5.30253					28.068	3.341	0.644378	0.895957					42.295	2.678	1.12258	0.95641					0.182	6	0.00301419	1.62778					3.639	20.112	0.0965855	7.18272
			32.293	3.326	0.741374	0.891934					41.99	6.746	0.963995	1.80908					3.047	23.637	0.0699522	6.33874					48.339	3.128	1.283	1.11712					22.381	4.126	0.370663	1.11937					0.958	18.363	0.025427	6.55809
			44.404	3.102	1.01942	0.831864					0.421	24.296	0.00966521	6.51547					0.296	56.587	0.00679549	15.175					49.808	3.178	1.32199	1.13498					20.367	2.464	0.337308	0.668475					14.418	4.46	0.382679	1.59283
			45.457	3.335	1.04359	0.894348					0.371	16.805	0.00851732	4.5066					23.017	3.317	0.528418	0.889521					46.491	2.811	1.23395	1.00391					3.253	2.913	0.0538746	0.790288					1.304	34.068	0.0346105	12.1669
			42.897	3.357	0.984818	0.900248					0.169	25.084	0.00387986	6.72678					42.766	2.858	0.981811	0.766431					54.36	3.396	1.44281	1.21283					0.075	0.836	0.00124211	0.226804					3.931	25.182	0.104336	8.9934
			42.92	3.846	0.985346	1.03138					0.153	24.017	0.00351253	6.44065					0.338	48.729	0.00775972	13.0677					41.151	2.444	1.09222	0.87284					0.208	2.215	0.00344479	0.600922					33.647	4.356	0.893051	1.55568
			34.996	3.699	0.803429	0.991962					0.267	26.947	0.00612972	7.22639					0.347	42.574	0.00796634	11.4171					40.943	2.748	1.0867	0.981409					0.224	3.118	0.00370978	0.845903					3.729	21.183	0.0989743	7.56521
			46.138	3.462	1.05922	0.928406					0.283	24.683	0.00649704	6.61925					2.018	32.295	0.0463287	8.66056					43.145	2.942	1.14514	1.05069					11.53	1.872	0.190954	0.507868					0.675	14.406	0.0179157	5.1449
			36.975	3.288	0.848862	0.881744					0.189	15.047	0.00433901	4.03516					0.503	31.051	0.0115477	8.32696					38.876	2.53	1.03184	0.903554					1.063	5.328	0.0176049	1.44547					0.362	6.508	0.00960812	2.32424
			47.564	3.292	1.09196	0.882817					0.376	23.193	0.00863211	6.21967					2.439	38.354	0.0559939	10.2854					60.54	2.78	1.60684	0.992838					1.509	8.628	0.0249913	2.34075					6.787	23.491	0.180139	8.38948
			49.64	4	1.13962	1.07268					45.455	5.197	1.04354	1.39368					21.794	3.272	0.500341	0.877453					41.136	3.32	1.09182	1.18569					0.91	14.478	0.015071	3.92784					1.603	24.468	0.0425465	8.7384
			45.178	3.672	1.03718	0.984721					7.903	11.834	0.181435	3.17353					1.453	24.699	0.0333576	6.62354					38.045	2.567	1.00978	0.916768					0.86	17.588	0.0142429	4.77157					0.429	20.385	0.0113864	7.28021
			47.553	3.297	1.09171	0.884157					3.889	8.926	0.0892826	2.39369					0.507	40.861	0.0116396	10.9577					43.589	2.531	1.15693	0.903911					2.313	15.635	0.0383068	4.24173					1.644	20.916	0.0436347	7.46985
			33.159	3.139	0.761256	0.841787					0.11	17.12	0.00252535	4.59108					5.08	1.817	0.116625	0.487265					43.148	2.498	1.14522	0.892125					0.388	15.363	0.00642586	4.16793					0.887	24.433	0.0235425	8.7259
			35.003	3.521	0.80359	0.944228					1.071	16.031	0.0245877	4.29904					1.085	32.739	0.0249091	8.77963					52.302	2.55	1.38819	0.910696					0.32	28.236	0.00529968	7.66034					0.948	14.123	0.0251616	5.04383
			40.485	4.012	0.929444	1.0759					0.225	13.945	0.00516549	3.73963					3.311	3.839	0.0760131	1.02951					52.236	3.23	1.38644	1.15355					0.293	24.424	0.00485252	6.62615					7.291	3.838	0.193516	1.37069
			44.63	3.499	1.0246	0.938328					27.151	9.509	0.623326	2.55003					6.477	7.273	0.148697	1.9504					36.708	2.358	0.974295	0.842126					8.841	12.818	0.14642	3.47748					0.964	12.37	0.0255863	4.41777
			51.05	3.155	1.17199	0.846077					0.211	9.029	0.00484408	2.42131					23.506	2.779	0.539645	0.745245					42.618	3.303	1.13116	1.17962					0.425	23.617	0.00703864	6.40722					0.388	5.902	0.0102982	2.10782
			32.995	3.281	0.757491	0.879867					0.194	25.759	0.0044538	6.9078					10.653	0.733	0.244569	0.196569					41.291	2.504	1.09594	0.894268					0.318	34.713	0.00526656	9.41753					0.694	14.629	0.01842	5.22454
			42.363	5.279	0.972559	1.41567					9.988	21.077	0.229302	5.65223					3.056	1.921	0.0701588	0.515155					45.824	3.222	1.21625	1.15069					8.916	5.409	0.147662	1.46744					8.041	3.761	0.213422	1.34319
			48.294	3.714	1.10872	0.995985					0.172	26.142	0.00394873	7.01051					20.007	2.137	0.459315	0.57308					53.385	2.817	1.41693	1.00605					0.282	22.614	0.00467034	6.13511					1.303	19.228	0.0345839	6.86701
			33.161	3.108	0.761302	0.833473					40.587	10.467	0.931786	2.80694					2.459	18.919	0.0564531	5.07351					50.643	3.009	1.34415	1.07462					4.701	9.737	0.0778556	2.64162					0.332	5.914	0.00881187	2.1121
			40.68	3.415	0.933921	0.915802					13.853	13.859	0.318034	3.71657					0.13	0.571	0.00298451	0.153125					43.737	2.426	1.16086	0.866412					0.315	22.519	0.00521687	6.10933					0.496	4.951	0.0131647	1.76818
			35.684	3.472	0.819224	0.931087					15.442	15.094	0.354513	4.04776					3.797	19.816	0.0871705	5.31406					37.676	2.96	0.999988	1.05712					13.951	10.179	0.23105	2.76153					6.765	3.885	0.179555	1.38747
			26.165	3.095	0.600689	0.829987					0.178	24.504	0.00408648	6.57125					27.063	2.038	0.621305	0.546531					44.46	2.878	1.18005	1.02784					0.289	26.712	0.00478627	7.24688					6.585	4.116	0.174778	1.46997
			33.217	4.079	0.762587	1.09387					8.074	15.295	0.185361	4.10166					1.707	26.98	0.0391889	7.23523					43.195	2.747	1.14647	0.981052					21.29	9.088	0.352594	2.46555					16.589	3.959	0.440301	1.4139
			42.71	3.525	0.980525	0.9453					10.381	17.211	0.238324	4.61548					4.605	18.266	0.10572	4.8984					55.359	3.156	1.46933	1.12712					5.95	11.428	0.0985409	3.10038					1.134	6.093	0.0300984	2.17603
			38.688	3.191	0.888189	0.855731					22.023	16.342	0.505598	4.38244					5.343	1.482	0.122663	0.397428					40.726	2.81	1.08094	1.00355					0.239	33.288	0.0039582	9.03093					17.132	4.232	0.454714	1.5114
			42.989	3.654	0.98693	0.979894					0.178	29.262	0.00408648	7.8472					5.84	0.332	0.134073	0.0890325					43.65	2.984	1.15855	1.06569					0.289	22.413	0.00478627	6.08058					18.073	4.466	0.479689	1.59497
			38.1	3.042	0.87469	0.815774					0.222	27.339	0.00509662	7.33151					28.97	2.092	0.665086	0.561012					46.256	2.865	1.22772	1.02319					0.162	16.455	0.00268296	4.46419					15.317	4.007	0.40654	1.43104
			42.927	3.784	0.985507	1.01476					0.215	40.435	0.00493591	10.8435					8.566	1.807	0.196656	0.484584					46.843	2.762	1.2433	0.986409					0.378	17.728	0.00626025	4.80955					18.671	4.116	0.495561	1.46997
			39.939	3.738	0.916909	1.00242					0.179	27.321	0.00410944	7.32668					20.794	2.303	0.477383	0.617596					40.893	3	1.08537	1.07141					0.508	7.185	0.00841324	1.94927					8.596	4.501	0.228153	1.60747
			44.822	3.473	1.02901	0.931355					5.249	15.034	0.120505	4.03167					7.657	38.304	0.175787	10.272					44.054	2.427	1.16927	0.866769					18.963	16.915	0.314056	4.58899					0.248	5.091	0.00658236	1.81818
			45.175	3.994	1.03712	1.07107					0.232	30.47	0.0053262	8.17115					10.836	1.903	0.24877	0.510328					47.637	3.315	1.26437	1.18391					0.163	14.748	0.00269952	4.00109					12.155	4.646	0.322615	1.65925
			40.087	3.708	0.920307	0.994375					1.255	15.811	0.028812	4.24004					0.383	28.796	0.00879281	7.72223					43.052	3.09	1.14268	1.10355					17.719	12.249	0.293453	3.32311					7.321	4.317	0.194312	1.54176
			47.259	3.7	1.08496	0.99223					0.202	32.673	0.00463746	8.76193					1.045	5.336	0.0239908	1.43096					40.753	2.668	1.08166	0.952839					0.183	23.376	0.00303075	6.34183					0.37	7.491	0.00982045	2.6753
			36.445	3.953	0.836695	1.06008					0.404	11.288	0.00927493	3.02711					3.397	15.145	0.0779874	4.06144					35.581	2.863	0.944383	1.02248					23.596	7.907	0.390785	2.14514					0.783	7.625	0.0207822	2.72316
			36.836	3.282	0.845671	0.880135					0.175	19.673	0.0040176	5.27571					0.65	22.759	0.0149225	6.10329					38.369	3.067	1.01838	1.09534					0.197	18.708	0.00326262	5.07542					0.66	7.12	0.0175176	2.54281
			38.025	3.04	0.872968	0.815238					25.232	10.358	0.57927	2.77771					26.82	2.556	0.615727	0.685443					44.075	2.888	1.16983	1.03141					0.257	8.013	0.00425631	2.1739					0.792	6.819	0.0210211	2.43531
			34.917	3.236	0.801615	0.867799					32.488	11.858	0.745851	3.17996					4.55	22.509	0.104458	6.03625					58.135	3.703	1.54301	1.32247					0.702	3.959	0.0116262	1.07406					0.861	14.575	0.0228525	5.20526
			33.499	4.042	0.769061	1.08394					27.501	11.429	0.631361	3.06492					3.792	25.121	0.0870557	6.73671					43.522	3.389	1.15515	1.21033					0.215	16.173	0.00356072	4.38768					0.469	40.861	0.0124481	14.5929
			33.743	3.432	0.774663	0.92036					4.996	8.932	0.114697	2.3953					0.394	53.728	0.00904535	14.4083					42.923	3.379	1.13925	1.20676					14.51	9.586	0.240307	2.60065					0.895	21.993	0.0237549	7.85449
			30.412	4.494	0.698191	1.20516					24.053	6.672	0.552202	1.78923					24.786	2.793	0.569031	0.749					46.957	2.68	1.24632	0.957124					0.232	15.897	0.00384227	4.31281					0.154	4.226	0.00408743	1.50926
			45.224	3.524	1.03824	0.945032					0.188	5.354	0.00431605	1.43578					41.059	2.347	0.942622	0.629396					49.317	3.156	1.30896	1.12712					12.593	5.644	0.208559	1.5312					0.819	22.331	0.0217377	7.9752
			48.165	3.471	1.10576	0.930819					1.204	8.243	0.0276411	2.21053					2.64	39.591	0.0606084	10.6171					40.692	3.099	1.08004	1.10676					0.159	7.313	0.00263328	1.98399					2.198	26.742	0.0583388	9.55053
			38.174	3.187	0.876389	0.854659					27.127	8.944	0.622775	2.39852					0.504	33.683	0.0115707	9.03278					45.034	3.004	1.19528	1.07284					0.205	9.314	0.00339511	2.52686					1.257	18.808	0.033363	6.71701
			40.597	3.317	0.932015	0.889521					4.777	18.037	0.109669	4.83699					1.037	20.861	0.0238072	5.5943					50.148	2.569	1.33102	0.917482					0.254	22.128	0.00420662	6.00326					7.741	14.304	0.20546	5.10847
			33.318	3.49	0.764906	0.935914					0.34	19.298	0.00780563	5.17515					23.833	2.991	0.547152	0.802097					41.081	3.317	1.09036	1.18462					0.138	14.972	0.00228549	4.06186					1.341	19.961	0.0355925	7.12879
			35.783	3.509	0.821497	0.94101					3.811	20.256	0.0874919	5.43206					0.549	42.265	0.0126038	11.3342					45.611	3.307	1.2106	1.18105					0.212	15.098	0.00351104	4.09604					0.231	11.423	0.00613115	4.07956
			50.599	3.464	1.16164	0.928942					19.078	8.884	0.437988	2.38242					5.477	1.924	0.12574	0.51596					55.003	3.323	1.45988	1.18676					0.187	15.754	0.003097	4.27401					0.712	27.462	0.0188977	9.80767
			33.154	3.57	0.761141	0.957368					19.677	7.744	0.451739	2.07671					0.774	29.692	0.0177693	7.96251					40.581	2.955	1.07709	1.05534					0.316	11.003	0.00523343	2.98508					0.675	21.745	0.0179157	7.76592
			34.8	3.093	0.798929	0.829451					5.407	6.492	0.124132	1.74096					0.992	7.918	0.0227741	2.12337					41.676	2.497	1.10615	0.891768					3.167	1.806	0.0524503	0.489962					1.467	19.284	0.0389368	6.88701
			27.432	3.992	0.629777	1.07054					3.171	25.064	0.072799	6.72142					20.396	1.975	0.468246	0.529636					39.839	2.802	1.0574	1.00069					0.172	13.854	0.00284858	3.75855					13.301	12.427	0.353032	4.43813
			40.591	3.26	0.931878	0.874235					10.705	20.89	0.245763	5.60208					0.163	0.521	0.00374211	0.139717					46.447	3.131	1.23279	1.11819					3.559	11.702	0.0589424	3.17472					2.361	27.284	0.0626651	9.7441
			44.788	3.366	1.02823	0.902661					4.783	14.839	0.109807	3.97938					3.442	20.24	0.0790205	5.42777					44.125	2.626	1.17116	0.937839					0.203	2.985	0.00336198	0.809821					1.816	18.732	0.0481998	6.68987
			26.973	3.518	0.619239	0.943423					0.193	12.348	0.00443084	3.31137					4.009	1.171	0.0920376	0.314027					45.866	3.694	1.21736	1.31926					0.147	10.293	0.00243454	2.79246					3.167	17.732	0.0840578	6.33273
			36.933	3.166	0.847898	0.849027					0.34	20.177	0.00780563	5.41087					0.488	23.541	0.0112034	6.313					43.394	2.955	1.15175	1.05534					0.196	6.2	0.00324605	1.68204					5.319	16.496	0.141176	5.89131
			33.492	3.297	0.768901	0.884157					0.459	14.708	0.0105376	3.94425					6.308	0.369	0.144817	0.0989548					40.542	3.631	1.07606	1.29676					7.187	3.174	0.119028	0.861096					2.521	15.114	0.0669118	5.39775
			31.799	3.937	0.730033	1.05579					0.291	39.891	0.0066807	10.6976					29.25	2.184	0.671514	0.585684					47.767	3.241	1.26782	1.15748					9.197	2.378	0.152316	0.645144					20.315	8.289	0.539196	2.9603
			29.664	3.606	0.681018	0.967022					0.637	16.297	0.0146241	4.37037					8.469	1.955	0.194429	0.524273					50.711	3.279	1.34596	1.17105					0.152	1.713	0.00251735	0.464731					6.655	10.395	0.176635	3.71243
			35.948	4.157	0.825285	1.11478					3.542	18.877	0.0813163	5.06225					1.489	25.609	0.0341841	6.86757					53.351	3.508	1.41603	1.25283					9.855	5.189	0.163214	1.40776					12.954	1.063	0.343822	0.379635
			33.104	3.463	0.759993	0.928674					2.806	25.592	0.0644194	6.86301					0.493	21.394	0.0113182	5.73724					39.892	2.901	1.0588	1.03605					14.413	5.507	0.238701	1.49403					1.59	20.727	0.0422014	7.40236
			37.305	3.61	0.856438	0.968095					0.205	13.168	0.00470634	3.53127					0.34	45.882	0.00780563	12.3042					48.292	3.466	1.28176	1.23783					0.803	3.492	0.0132989	0.947368					15.059	10.35	0.399692	3.69636
			48.843	3.629	1.12132	0.97319					1.669	15.886	0.0383165	4.26015					19.102	2.32	0.438539	0.622155					39.169	3.239	1.03961	1.15676					0.213	6.164	0.0035276	1.67227					2.647	30.727	0.0702561	10.9737
			37.835	3.071	0.868606	0.823551					0.197	16.958	0.00452267	4.54763					32.1	1.868	0.736943	0.500942					57.722	3.838	1.53204	1.37069					22.337	3.967	0.369934	1.07623					0.926	18.424	0.0245777	6.57987
			30.146	3.352	0.692084	0.898907					6.266	22.381	0.143853	6.00192					0.372	29.55	0.00854028	7.92443					46.442	2.674	1.23265	0.954981					0.156	9.887	0.00258359	2.68231					2.046	16.773	0.0543045	5.99024
			41.911	3.874	0.962182	1.03889					0.231	28.349	0.00530324	7.60236					4.387	20.926	0.100716	5.61173					49.804	3.519	1.32189	1.25676					20.013	2.306	0.331445	0.62561					7.023	21.333	0.186403	7.61878
			41.476	3.608	0.952195	0.967558					9.279	19.164	0.213025	5.13922					30.265	2.175	0.694816	0.58327					58.885	4.206	1.56291	1.50211					2.667	2.544	0.0441695	0.690179					1.844	17.723	0.048943	6.32952
			28.251	3.462	0.648579	0.928406					3.031	16.053	0.0695849	4.30494					0.877	40.962	0.0201339	10.9848					49.196	2.997	1.30575	1.07034					0.137	1.499	0.00226893	0.406674					0.489	25.882	0.0129789	9.24339
			24.293	4.046	0.557712	1.08502					0.588	17.72	0.0134992	4.75198					0.277	47.214	0.00635929	12.6614					47.556	3.688	1.26222	1.31712					0.213	2.355	0.0035276	0.638904					1.611	17.547	0.0427588	6.26666
			37.604	3.115	0.863303	0.83535					0.499	18.591	0.0114559	4.98555					0.377	25.994	0.00865507	6.97082					40.45	2.706	1.07361	0.96641					0.189	2.743	0.00313012	0.744167					0.933	20.498	0.0247635	7.32057
			43.324	3.829	0.994621	1.02682					1.841	7.981	0.0422652	2.14027					0.37	28.622	0.00849436	7.67557					46.714	3.665	1.23987	1.3089					11.748	1.86	0.194565	0.504612					1.071	23.519	0.0284262	8.39948
			24.496	3.614	0.562373	0.969167					0.249	17.345	0.00571648	4.65141					36.33	2.405	0.834055	0.64495					47.723	3.807	1.26665	1.35962					0.365	32.239	0.00604495	8.74634					3.154	14.637	0.0837127	5.2274
			31.284	3.137	0.71821	0.84125					1.02	35.08	0.0234169	9.40741					16.51	2.942	0.379032	0.788957					49.291	3.927	1.30827	1.40247					0.436	26.422	0.00722081	7.1682					2.022	11.947	0.0536675	4.2667
			34.305	3.422	0.787565	0.917679					0.923	35.168	0.02119	9.43101					0.323	26.143	0.00741535	7.01078					43.199	2.749	1.14658	0.981767					0.48	29.207	0.00794952	7.92377					1.706	18.418	0.0452803	6.57773
			42.214	3.786	0.969138	1.01529					3.339	12.958	0.0766559	3.47495					13.668	2.905	0.313786	0.779035					48.537	3.075	1.28826	1.09819					0.257	3.313	0.00425631	0.898806					18.237	15.199	0.484042	5.42811
			41.295	3.904	0.94804	1.04694					0.952	34.316	0.0218558	9.20253					25.664	1.815	0.589187	0.486729					55.135	4.184	1.46338	1.49426					0.306	20.284	0.00506782	5.50298					5.454	18.389	0.144759	6.56737
			31.119	3.949	0.714422	1.059					0.418	32.946	0.00959633	8.83514					1.622	31.573	0.0372375	8.46694					50.091	2.634	1.3295	0.940696					0.457	37.423	0.00756861	10.1527					2.641	10.87	0.0700968	3.88207
			41.496	3.739	0.952654	1.00269					0.161	22.474	0.0036962	6.02686					30.976	2.59	0.711139	0.694561					40.391	2.702	1.07205	0.964981					0.19	3.214	0.00314669	0.871948					4.065	15.184	0.107892	5.42275
			28.119	3.202	0.645549	0.858681					0.208	15.543	0.00477521	4.16817					1.893	28.102	0.043459	7.53612					50.796	3.789	1.34822	1.35319					21.507	10.444	0.356188	2.83342					6.649	12.446	0.176476	4.44491
			49.624	3.333	1.13925	0.893812					26.475	11.27	0.607806	3.02228					31.133	2.49	0.714743	0.667744					56.352	3.941	1.49568	1.40747					0.261	18.505	0.00432255	5.02035					0.657	15.476	0.0174379	5.52703
			35.702	3.522	0.819637	0.944496					0.224	25.944	0.00514253	6.95741					1.179	30.776	0.0270672	8.25321					43.454	2.733	1.15335	0.976052					0.303	41.31	0.00501813	11.2073					1.696	14.029	0.0450148	5.01026
			39.19	3.389	0.899714	0.908829					8.621	13.111	0.197919	3.51598					0.336	57.176	0.0077138	15.3329					54.512	4.192	1.44684	1.49711					0.134	1.653	0.00221924	0.448454					2.113	17.711	0.0560828	6.32523
			46.188	3.476	1.06037	0.93216					2.164	15.701	0.0496805	4.21054					14.846	2.489	0.340831	0.667476					43.739	3.463	1.16091	1.23676					12	1.697	0.198738	0.460391					0.192	3.335	0.00509602	1.19105
			40.765	3.609	0.935872	0.967827					1.771	27.74	0.0406582	7.43904					5.469	35.449	0.125556	9.50637					42.952	3.165	1.14002	1.13034					2.076	38.666	0.0343817	10.49					0.16	3.956	0.00424668	1.41283
			55.315	3.986	1.26991	1.06893					0.231	29.383	0.00530324	7.87965					0.252	1	0.00578535	0.26817					37.653	4.191	0.999377	1.49676					0.935	2.784	0.015485	0.75529					1.904	22.286	0.0505355	7.95913
			27.657	4.144	0.634942	1.1113					0.182	3.412	0.00417831	0.914997					1.464	12.85	0.0336101	3.44599					40.358	2.585	1.07117	0.923196					0.525	43.07	0.00869479	11.6848					3.956	10.746	0.104999	3.83778
			22.192	4.134	0.509478	1.10862					0.21	9.136	0.00482113	2.45					2.345	12.617	0.0538359	3.3835					49.987	2.609	1.32674	0.931768					1.921	6.68	0.0318146	1.81226					1.552	19.867	0.0411928	7.09522
			36.276	3.791	0.832815	1.01663					0.207	4.34	0.00475225	1.16386					0.419	24.964	0.00961929	6.6946					45.031	3.757	1.1952	1.34176					0.498	18.984	0.00824763	5.1503					1.464	16.09	0.0388571	5.74632
			37.744	3.499	0.866517	0.938328					0.162	3.771	0.00371915	1.01127					0.293	51.576	0.00672662	13.8312					45.756	2.595	1.21445	0.926768					8.835	1.773	0.146321	0.481009					0.585	24.178	0.0155269	8.63483
			41.121	4.485	0.944045	1.20274					0.195	8.436	0.00447676	2.26228					5.064	25.36	0.116258	6.8008					41.665	3.718	1.10586	1.32783					1.119	28.924	0.0185323	7.84699					1.261	27.953	0.0334692	9.98302
			41.947	3.714	0.963008	0.995985					1.754	5.369	0.0402679	1.43981					0.345	37.717	0.00792042	10.1146					59.765	4.77	1.58627	1.70354					0.565	5.286	0.00935725	1.43407					5.786	17.651	0.153571	6.30381
			42.77	3.6	0.981902	0.965413					0.262	41.391	0.00601493	11.0998					1.582	29.718	0.0363191	7.96949					39.288	2.533	1.04277	0.904625					0.401	17.758	0.00664116	4.81769					10.023	18.12	0.266028	6.4713
			39.487	3.661	0.906532	0.981771					0.378	34.157	0.00867803	9.15989					19.529	2.895	0.448342	0.776353					52.585	3.432	1.3957	1.22569					0.422	4.246	0.00698895	1.15193					2.843	12.726	0.0754582	4.54491
			22.421	3.955	0.514735	1.06061					0.18	6.118	0.00413239	1.64067					1.162	30.749	0.0266769	8.24597					44.835	4.037	1.19	1.44176					0.43	6.313	0.00712145	1.7127					0.225	12.016	0.0059719	4.29134
			39.537	4.485	0.90768	1.20274					0.204	24.48	0.00468338	6.56481					4.304	22.686	0.0988101	6.08371					40.137	2.549	1.06531	0.910339					0.203	1.869	0.00336198	0.507054					0.99	14.622	0.0262763	5.22204
			29.463	3.549	0.676404	0.951736					0.287	31.852	0.00658887	8.54176					0.937	26.578	0.0215114	7.12743					43.841	2.387	1.16362	0.852483					0.263	3.99	0.00435567	1.08247					0.987	15.45	0.0261967	5.51775
			35.486	3.768	0.814678	1.01047					0.378	41.698	0.00867803	11.1822					0.317	3.804	0.0072776	1.02012					48.591	2.594	1.28969	0.92641					28.602	2.973	0.473692	0.806565					0.744	18.785	0.0197471	6.7088
			32.307	3.815	0.741696	1.02307					5.51	20.008	0.126497	5.36555					4.596	23.53	0.105514	6.31005					50.065	4	1.32881	1.42854					1.145	15.137	0.0189629	4.10662					2.032	12.722	0.0539329	4.54348
			27.503	3.842	0.631407	1.03031					0.243	15.398	0.00557873	4.12929					0.48	32.335	0.0110197	8.67129					35.701	3.467	0.947568	1.23819					0.081	0.919	0.00134148	0.249322					2.78	14.936	0.0737861	5.33418
			32.568	3.769	0.747688	1.01073					1.956	27.797	0.0449053	7.45433					1.102	28.408	0.0252994	7.61818					46.522	4.09	1.23478	1.46069					43.139	2.612	0.714447	0.708627					0.307	22.484	0.00814832	8.02984
			38.255	6.062	0.878248	1.62565					0.169	23.686	0.00387986	6.35188					0.131	2.101	0.00300746	0.563426					46.548	4.457	1.23547	1.59175					0.161	12.665	0.0026664	3.43597					1.065	16.836	0.028267	6.01274
			33.781	3.754	0.775535	1.00671					0.298	33.812	0.00684141	9.06737					0.349	17.349	0.00801225	4.65249					41.175	2.916	1.09286	1.04141					3.271	8.496	0.0541727	2.30494					0.382	18.87	0.010139	6.73915
			35.939	3.569	0.825078	0.9571					0.149	7.177	0.0034207	1.92466					0.538	30.898	0.0123513	8.28593					49.868	4.495	1.32358	1.60533					40.644	2.335	0.673126	0.633478					5.95	14.054	0.157924	5.01919
			37.379	3.404	0.858137	0.912852					0.333	21.115	0.00764493	5.66242					0.38	42.609	0.00872394	11.4265					44.816	4.385	1.1895	1.56604					0.717	23.76	0.0118746	6.44601					0.541	29.752	0.0143591	10.6255
			52.482	4.233	1.20487	1.13516					1.599	16.688	0.0367094	4.47523					0.293	11.363	0.00672662	3.04722					46.744	2.598	1.24067	0.927839					0.313	8.951	0.00518375	2.42838					3.295	20.03	0.0874551	7.15343
			51.469	4.295	1.18161	1.15179					0.168	18.341	0.0038569	4.91851					0.337	42.886	0.00773676	11.5008					50.941	2.593	1.35206	0.926053					0.219	13.765	0.00362697	3.7344					2.672	26.495	0.0709196	9.46232
			36.238	3.73	0.831943	1.00028					4.147	9.905	0.0952057	2.65623					0.476	5.989	0.0109279	1.60607					36.212	2.206	0.96113	0.787842					40.346	2.222	0.66819	0.602821					1.301	21.532	0.0345308	7.68985
			16.102	3.944	0.369666	1.05766					7.565	7.745	0.173675	2.07698					0.351	46.813	0.00805817	12.5539					46.53	2.62	1.23499	0.935696					31.2	3.087	0.516719	0.837493					0.339	21.744	0.00899766	7.76556
			25.94	3.843	0.595524	1.03058					0.201	13.783	0.00461451	3.69619					0.616	31.53	0.014142	8.45541					48.532	4.447	1.28813	1.58818					19.393	4.06	0.321177	1.10147					0.698	22.683	0.0185262	8.10091
			42.278	3.732	0.970607	1.00081					3.775	9.431	0.0866655	2.52911					4.897	13.865	0.112424	3.71818					44.846	2.467	1.19029	0.881054					0.723	4.983	0.011974	1.35187					0.617	17.86	0.0163763	6.37845
			32.685	4.036	0.750374	1.08234					0.443	16.934	0.0101703	4.5412					10.79	31.885	0.247714	8.55061					42.388	2.345	1.12505	0.837484					20.894	2.991	0.346036	0.811449					3.126	21.683	0.0829696	7.74378
			37.679	4.063	0.865025	1.08958					0.391	15.318	0.00897648	4.10783					2.677	14.574	0.0614579	3.90831					54.45	4.779	1.4452	1.70675					17.837	2.977	0.295407	0.807651					2.415	22.271	0.0640984	7.95377
			28.189	3.885	0.647156	1.04184					0.581	9.575	0.0133384	2.56773					1.157	14.189	0.0265621	3.80507					46.361	2.75	1.2305	0.982124					32.124	2.676	0.532022	0.72599					0.313	19.904	0.00830757	7.10843
			39.678	3.782	0.910917	1.01422					0.17	25.189	0.00390282	6.75494					0.492	26.842	0.0112952	7.19823					45.522	3.127	1.20823	1.11676					33.282	2.624	0.5512	0.711883					3.476	23.711	0.0922592	8.46805
			37.037	4.136	0.850286	1.10915					0.42	14.724	0.00964225	3.94854					0.301	38.589	0.00691028	10.3484					46.815	2.661	1.24255	0.950339					17.839	1.978	0.295441	0.536625					0.31	27.105	0.00822795	9.68017
			10.542	1.19	0.24202	0.319123					62.975	1.99	1.44576	0.533659					0.48	47.597	0.0110197	12.7641					44.841	2.619	1.19016	0.935339					23.257	2.269	0.385171	0.615572					2.309	23.015	0.0612849	8.21948
			36.868	4.474	0.846406	1.19979					1.303	31.132	0.0299139	8.34868					0.665	7.743	0.0152669	2.07644					43.42	2.84	1.15244	1.01427					14.834	2.349	0.245673	0.637276					12.541	20.405	0.33286	7.28736
			39.771	4.506	0.913052	1.20838					0.513	8.743	0.0117773	2.34461					6.981	23.149	0.160268	6.20787					42.246	2.686	1.12128	0.959267					22.117	2.914	0.366291	0.790559					1.721	23.494	0.0456784	8.39055
			37.988	4.605	0.872119	1.23492					1.332	29.7	0.0305797	7.96466					0.93	13.011	0.0213507	3.48916					54.942	3.327	1.45826	1.18819					2.291	12.261	0.0379424	3.32637					0.689	22.749	0.0182873	8.12448
			0.347	4.519	0.00796634	1.21186					0.144	5.188	0.00330591	1.39127					3.76	10.927	0.0863211	2.9303					41.781	2.867	1.10894	1.02391					42.91	2.552	0.710654	0.692349					13.518	20.166	0.358792	7.202
			32.725	4.518	0.751292	1.21159					25.818	2.065	0.592723	0.553772					0.475	43.268	0.0109049	11.6032					33.151	2.468	0.879886	0.881411					29.565	2.616	0.489641	0.709712					0.88	23.175	0.0233568	8.27662
			39.355	4.573	0.903502	1.22634					0.194	27.01	0.0044538	7.24328					7.588	44.978	0.174203	12.0618					43.943	2.852	1.16632	1.01855					0.577	12.97	0.00955599	3.51872					4.673	20.764	0.12403	7.41557
			36.89	5.28	0.846911	1.41594					0.189	35.3	0.00433901	9.46641					1.157	44.437	0.0265621	11.9167					44.126	2.97	1.17118	1.06069					35.765	2.752	0.592322	0.746609					0.693	19.515	0.0183934	6.96951
			0.253	3.604	0.00580831	0.966486					2.355	12.912	0.0540655	3.46261					5.65	27.975	0.129711	7.50206					48.75	3.616	1.29391	1.2914					28.208	17.42	0.467167	4.72599					3.28	21.803	0.087057	7.78663
			0.262	4.108	0.00601493	1.10164					0.313	11.166	0.00718577	2.99439					0.289	34.23	0.00663479	9.17947					42.979	3.272	1.14074	1.16855					32.313	2.263	0.535152	0.613945					11.549	21.501	0.306531	7.67878
			0.28	4.045	0.00642817	1.08475					1.297	32.522	0.0297762	8.72143					1.284	34.07	0.0294777	9.13656					46.007	3.28	1.22111	1.17141					45.932	2.857	0.760703	0.775095					8.444	19.122	0.224119	6.82915
			0.228	5.937	0.00523436	1.59213					0.173	7.338	0.00397169	1.96783					5.719	27.417	0.131295	7.35243					55.327	3.169	1.46848	1.13176					46.248	2.207	0.765936	0.598752					1.311	12.306	0.0347963	4.39491
			0.199	4.356	0.00456859	1.16815					0.708	11.791	0.0162541	3.162					0.805	36.386	0.018481	9.75764					59.182	4.098	1.57079	1.46354					39.172	2.267	0.648747	0.61503					9.617	21.149	0.255252	7.55307
			0.232	4.699	0.0053262	1.26013					0.222	11.195	0.00509662	3.00217					0.661	32.671	0.0151751	8.76139					61.833	4.313	1.64116	1.54033					25.779	15.884	0.426939	4.30928					0.386	25.068	0.0102451	8.95268
			0.176	4.352	0.00404056	1.16708					5.056	8.886	0.116074	2.38296					0.303	44.932	0.00695619	12.0494					48.481	4.739	1.28677	1.69247					48.822	2.619	0.808566	0.710526					0.253	2.238	0.00671507	0.79927
			58.824	3.698	1.35047	0.991694					0.198	30.468	0.00454563	8.17061					1.223	31.006	0.0280773	8.31489					57.834	3.697	1.53502	1.32033					36.083	2.267	0.597589	0.61503					0.292	27.776	0.0077502	9.91981
			55.072	3.614	1.26433	0.969167					0.208	27.453	0.00477521	7.36208					0.333	45.514	0.00764493	12.2055					52.814	3.404	1.40178	1.21569					42.5	2.837	0.703864	0.769669					11.046	18.693	0.29318	6.67594
			60.55	4.11	1.39009	1.10218					0.441	24.995	0.0101244	6.70292					0.634	34.899	0.0145552	9.35888					47.21	3.674	1.25304	1.31212					53.338	2.056	0.883357	0.557786					4.265	19.667	0.113201	7.02379
			65.145	4.244	1.49558	1.13811					4.624	21.997	0.106157	5.89894					0.649	37.67	0.0148996	10.102					47.063	3.51	1.24914	1.25355					51.1	3.115	0.846293	0.84509					4.75	12.355	0.126073	4.41241
			69.035	4.232	1.58489	1.1349					11.736	19.01	0.269432	5.09792					0.388	49.832	0.0089076	13.3635					48.268	3.652	1.28112	1.30426					44.101	1.841	0.730379	0.499457					2.095	26.257	0.055605	9.37732
			63.625	3.985	1.46069	1.06866					11.91	13.777	0.273427	3.69458					0.208	26.487	0.00477521	7.10303					42.62	3.36	1.13121	1.19998					27.187	2.338	0.450258	0.634292					3.496	22.427	0.09279	8.00949
			53.174	3.866	1.22075	1.03675					10.015	11.126	0.229922	2.98366					0.266	32.734	0.00610676	8.77829					47.376	3.456	1.25744	1.23426					50.597	2.012	0.837962	0.545849					1.493	16.3	0.0396269	5.82131
			51.173	3.286	1.17482	0.881208					0.967	3.434	0.0222001	0.920897					0.207	45.298	0.00475225	12.1476					0.172	0.891	0.00456518	0.318208					38.47	1.343	0.637121	0.364352					1.824	18.756	0.0484122	6.69844
			36.607	3	0.840414	0.804511					0.219	37.216	0.00502774	9.98023					0.345	38.008	0.00792042	10.1926					45.087	3.209	1.19669	1.14605					39.094	1.748	0.647455	0.474227					1.482	19.506	0.0393349	6.96629
			62.766	3.608	1.44097	0.967558					0.176	33.292	0.00404056	8.92793					0.74	36.829	0.0169887	9.87644					46.874	4.123	1.24412	1.47247					40.683	1.772	0.673772	0.480738					0.227	2.864	0.00602498	1.02284
			40.301	3.162	0.92522	0.847955					1.132	16.955	0.0259882	4.54683					4.686	14.744	0.10758	3.9539					56.338	3.341	1.49531	1.19319					0.316	41.308	0.00523343	11.2067					9.732	17.023	0.258304	6.07952
			56.21	3.436	1.29045	0.921433					1.211	18.076	0.0278018	4.84745					0.117	0.675	0.00268606	0.181015					47.249	3.42	1.25407	1.2214					38.318	2.169	0.634604	0.588443					1.355	22.889	0.0359641	8.17448
			34.596	2.719	0.794246	0.729155					0.133	21.731	0.00305338	5.82761					2.644	23.413	0.0607003	6.27867					45.889	2.973	1.21798	1.06176					42.029	1.292	0.696063	0.350515					2.568	20.006	0.0681593	7.14486
			59.253	4.042	1.36031	1.08394					0.258	28.793	0.0059231	7.72143					0.33	37.558	0.00757605	10.0719					39.32	3.268	1.04362	1.16712					36.805	1.678	0.609546	0.455236					2.652	16.964	0.0703888	6.05845
			56.215	4.012	1.29057	1.0759					1.409	6.236	0.0323475	1.67231					0.682	55.208	0.0156572	14.8051					48.786	3.064	1.29487	1.09426					0.302	17.271	0.00500157	4.68557					1.318	28.088	0.034982	10.0312
			53.922	3.998	1.23793	1.07214					0.168	6.338	0.0038569	1.69966					0.696	56.417	0.0159786	15.1294					0.119	0.895	0.00315847	0.319637					0.24	18.145	0.00397476	4.92268					1.285	26.789	0.0341062	9.56731
			64.571	4.177	1.4824	1.12015					0.18	9.434	0.00413239	2.52992					0.247	46.888	0.00567056	12.574					49.922	2.963	1.32502	1.05819					54.695	1.771	0.905831	0.480467					8.69	23.277	0.230648	8.31305
			55.373	3.793	1.27124	1.01717					3.241	12.363	0.074406	3.31539					2.604	20.646	0.059782	5.53664					38.31	3.348	1.01682	1.19569					23.508	2.114	0.389328	0.573521					3.03	15.51	0.0804216	5.53918
			59.105	3.897	1.35692	1.04506					3.037	7.185	0.0697227	1.9268					0.256	32.638	0.00587718	8.75254					48.569	2.955	1.28911	1.05534					44.937	1.792	0.744224	0.486164					0.892	39.798	0.0236753	14.2133
			62.992	3.37	1.44615	0.903734					0.176	23.706	0.00404056	6.35725					0.281	26.632	0.00645112	7.14191					35.196	2.902	0.934164	1.03641					41.879	1.345	0.693579	0.364894					0.255	18.245	0.00676815	6.51594
			61.557	3.731	1.41321	1.00054					26.427	4.481	0.606704	1.20167					47.337	3.217	1.08675	0.862704					42.017	2.792	1.11521	0.997123					18.343	4.436	0.303788	1.20347					4.191	17.156	0.111237	6.12702
			49.457	3.907	1.13542	1.04774					0.456	19.019	0.0104687	5.10033					43.479	2.554	0.99818	0.684907					55.487	4.062	1.47272	1.45069					46.09	1.689	0.76332	0.45822					1.577	14.431	0.0418564	5.15383
			60.27	4.103	1.38366	1.1003					0.344	9.863	0.00789746	2.64496					26.073	2.564	0.598577	0.687589					56.04	3.497	1.4874	1.2489					34.73	1.454	0.575181	0.394466					7.02	11.503	0.186323	4.10813
			58.139	3.903	1.33474	1.04667					0.257	15.356	0.00590014	4.11802					9.83	3.24	0.225675	0.868872					43.108	2.628	1.14416	0.938553					54.709	1.879	0.906063	0.509767					11.251	5.337	0.298621	1.90603
			58.886	3.85	1.35189	1.03246					0.237	30.011	0.00544098	8.04806					0.443	9.897	0.0101703	2.65408					37.875	2.672	1.00527	0.954267					45.26	1.493	0.749574	0.405046					1.829	9.848	0.0485449	3.51707
			44.297	3.516	1.01696	0.942887					0.3	17.926	0.00688732	4.80722					17.966	2.242	0.412459	0.601238					37.966	2.54	1.00768	0.907125					34.978	1.854	0.579288	0.502984					2.667	7.267	0.0707869	2.59531
			56.608	4.539	1.29959	1.21723					0.12	11.508	0.00275493	3.0861					0.242	38.336	0.00555577	10.2806					46.322	3.054	1.22947	1.09069					43.247	1.585	0.716235	0.430005					1.562	9.335	0.0414582	3.33386
			48.004	3.871	1.10206	1.03809					0.197	28.585	0.00452267	7.66565					32.33	9.467	0.742224	2.53877					39.629	3.376	1.05182	1.20569					0.25	18.036	0.00414038	4.89311					1.8	8.753	0.0477752	3.12601
			57.741	3.15	1.3256	0.844736					0.27	17.675	0.00619859	4.73991					0.404	43.609	0.00927493	11.6946					42.691	2.677	1.13309	0.956053					21.064	1.064	0.348851	0.28866					1.525	10.084	0.0404762	3.60136
			40.54	2.926	0.930707	0.784666					0.137	19.552	0.00314521	5.24327					27.361	2.757	0.628147	0.739346					45.966	2.519	1.22002	0.899625					0.789	15.171	0.013067	4.11584					2.43	11.012	0.0644965	3.93278
			57.34	3.865	1.3164	1.03648					0.15	13.615	0.00344366	3.65114					24.642	2.974	0.565725	0.797538					41.391	2.76	1.09859	0.985695					4.514	15.631	0.0747586	4.24064					0.641	12.112	0.0170133	4.32563
			52.465	3.679	1.20448	0.986599					5.137	12.315	0.117934	3.30252					14.444	2.523	0.331602	0.676594					50.289	3.106	1.33476	1.10926					0.637	14.958	0.0105497	4.05806					0.382	13.345	0.010139	4.76598
			36.787	3.265	0.844546	0.875576					1.728	23.931	0.039671	6.41758					0.301	41.015	0.00691028	10.999					39.637	2.515	1.05204	0.898197					0.487	7.572	0.00806545	2.05426					4.655	3.468	0.123552	1.23855
			50.604	3.216	1.16175	0.862436					0.177	2.888	0.00406352	0.774476					0.125	33.446	0.00286972	8.96922					39.217	3.2	1.04089	1.14283					2.125	3.197	0.0351932	0.867336					4.74	9.859	0.125808	3.521
			40.553	3.489	0.931005	0.935646					0.232	18.434	0.0053262	4.94345					0.241	45.364	0.00553281	12.1653					40.397	2.712	1.07221	0.968553					2.184	3.182	0.0361703	0.863266					1.233	16.188	0.032726	5.78132
			64.69	3.895	1.48514	1.04452					0.19	25.553	0.00436197	6.85256					5.212	2.251	0.119656	0.603651					43.903	2.658	1.16526	0.949267					16.154	2.029	0.267534	0.550461					1.83	9.5	0.0485714	3.39279
			60.786	3.87	1.39551	1.03782					0.311	11.32	0.00713986	3.03569					1.158	3.761	0.0265851	1.00859					24.18	3.421	0.64178	1.22176					34.367	1.277	0.569169	0.346446					0.553	9.331	0.0146776	3.33243
			58.238	3.835	1.33701	1.02843					1.926	26.722	0.0442166	7.16605					0.736	8.062	0.0168969	2.16199					34.759	2.435	0.922565	0.869626					40.051	1.184	0.663305	0.321215					0.828	10.626	0.0219766	3.79493
			57.935	4.006	1.33006	1.07429					0.195	12.868	0.00447676	3.45082					0.374	33.989	0.00858619	9.11484					33.627	2.607	0.89252	0.931053					10.223	2.092	0.169308	0.567553					2.155	9.136	0.0571975	3.26279
			33.874	3.724	0.77767	0.998666					0.197	29.462	0.00452267	7.90083					1.11	4.132	0.0254831	1.10808					39.634	2.712	1.05196	0.968553					0.154	4.32	0.00255047	1.172					11.487	5.395	0.304885	1.92675
			51.875	3.757	1.19093	1.00752					0.259	5.411	0.00594605	1.45107					0.432	32.826	0.00991774	8.80296					40.264	2.411	1.06868	0.861055					6.251	2.19	0.103526	0.59414					4.095	10.103	0.108689	3.60814
			51.775	3.788	1.18864	1.01583					0.27	24.692	0.00619859	6.62166					5.462	20.979	0.125395	5.62594					34.793	2.489	0.923468	0.888911					6.102	2.266	0.101058	0.614759					4.417	7.452	0.117235	2.66138
			37.21	3.583	0.854257	0.960854					0.166	6.743	0.00381098	1.80827					0.627	10.452	0.0143945	2.80292					37.681	2.615	1.00012	0.93391					3.491	1.541	0.0578162	0.418068					10.261	14.296	0.272345	5.10561
			44.206	4.027	1.01487	1.07992					0.264	10.347	0.00606084	2.77476					7.738	22.41	0.177647	6.0097					37.774	3.149	1.00259	1.12462					1.707	4.484	0.0282705	1.21649					1.106	12.555	0.0293552	4.48384
			34.354	3.154	0.78869	0.845809					0.179	26.879	0.00410944	7.20815					0.261	37.24	0.00599197	9.98666					37.627	2.489	0.998687	0.888911					4.196	6.322	0.0694921	1.71514					0.86	11.285	0.0228259	4.03028
			58.134	3.964	1.33463	1.06303					0.184	31.202	0.00422422	8.36745					0.262	38.213	0.00601493	10.2476					40.466	2.433	1.07404	0.868912					15.571	1.801	0.257879	0.488606					5.108	12.751	0.135575	4.55384
			50.813	3.223	1.16655	0.864313					5.646	13.557	0.129619	3.63558					0.317	24.468	0.0072776	6.56159					0.149	1.02	0.00395472	0.364279					15.868	1.355	0.262798	0.367607					4.436	10.135	0.117739	3.61957
			55.902	3.347	1.28338	0.897566					0.176	15.531	0.00404056	4.16495					0.532	38.623	0.0122135	10.3575					35.794	2.601	0.950036	0.92891					25.206	2.185	0.417449	0.592784					0.54	13.205	0.0143326	4.71598
			56.585	3.402	1.29906	0.912315					9.167	17.094	0.210454	4.5841					0.524	31.447	0.0120299	8.43315					33.448	2.383	0.887769	0.851055					9.62	1.816	0.159322	0.492675					1.044	5.099	0.0277096	1.82104
			37.33	3.339	0.857012	0.895421					0.131	3.931	0.00300746	1.05418					0.707	45.693	0.0162311	12.2535					44.992	2.828	1.19417	1.00998					18.604	1.508	0.30811	0.409116					3.001	10.734	0.0796518	3.8335
			40.207	3.239	0.923062	0.868604					0.182	21.879	0.00417831	5.8673					1.469	28.625	0.0337249	7.67637					35.504	2.339	0.942339	0.835341					0.261	7.349	0.00432255	1.99376					2.993	7.651	0.0794395	2.73245
			55.727	3.467	1.27937	0.929746					0.303	18.116	0.00695619	4.85817					0.686	41.678	0.015749	11.1768					47.133	4.273	1.25099	1.52604					6.86	2.882	0.113612	0.781877					1.444	15.501	0.0383263	5.53596
			53.121	4.069	1.21954	1.09118					4.768	8.644	0.109462	2.31806					0.208	2.683	0.00477521	0.719501					30.848	2.275	0.81876	0.812484					10.936	1.226	0.181117	0.33261					8.031	10.52	0.213157	3.75707
			44.43	3.588	1.02001	0.962195					34.652	17.971	0.795532	4.81929					4.249	28.379	0.0975474	7.61041					36.442	2.791	0.967235	0.996766					10.248	1.457	0.169722	0.395279					0.689	9.743	0.0182873	3.47957
			50.876	4.381	1.168	1.17485					0.635	19.99	0.0145782	5.36072					0.367	42.736	0.00842549	11.4605					34.639	2.185	0.91938	0.780342					5.019	2.107	0.0831222	0.571622					3.002	7.789	0.0796784	2.78173
			44.059	3.963	1.0115	1.06276					0.493	20.745	0.0113182	5.56319					0.572	33.341	0.0131318	8.94107					28.95	2.237	0.768384	0.798913					2.474	1.383	0.0409732	0.375203					1.224	13.617	0.0324871	4.86312
			54.826	4.128	1.25868	1.10701					2.866	21.943	0.0657969	5.88446					58.654	9.969	1.34656	2.67339					37.42	2.307	0.993193	0.823912					16.075	2.133	0.266226	0.578676					1.428	8.534	0.0379016	3.0478
			52.33	4.185	1.20138	1.12229					9.624	8.292	0.220945	2.22367					0.317	40.714	0.0072776	10.9183					32.204	2.475	0.854751	0.883911					12.156	1.476	0.201322	0.400434					2.884	14.491	0.0765465	5.17526
			40.17	3.514	0.922212	0.94235					3.797	13.148	0.0871705	3.5259					0.362	41.414	0.0083107	11.106					51.54	3.529	1.36796	1.26033					11.141	5.345	0.184512	1.45008					1.985	10.633	0.0526854	3.79743
			46.606	3.688	1.06997	0.989012					0.335	22.614	0.00769084	6.0644					1.669	29.536	0.0383165	7.92068					25.463	2.545	0.675833	0.908911					0.126	7.338	0.00208675	1.99078					8.495	10.546	0.225472	3.76636
			58.113	3.381	1.33414	0.906684					0.206	12.196	0.00472929	3.27061					0.636	41.411	0.0146011	11.1052					35.422	2.255	0.940162	0.805341					15.931	4.024	0.263841	1.0917					1.934	10.423	0.0513318	3.72243
			36.839	3.804	0.84574	1.02012					0.255	9.303	0.00585422	2.49479					1.578	29.161	0.0362273	7.82011					22.708	2.075	0.60271	0.741057					8.146	1.62	0.13491	0.439501					1.6	11.022	0.0424668	3.93635
			30.966	3.212	0.710909	0.861363					0.177	13.456	0.00406352	3.6085					1.664	26.243	0.0382017	7.03759					42.141	2.901	1.1185	1.03605					4.996	11.964	0.0827413	3.24579					2.985	10.971	0.0792272	3.91814
			56.475	3.194	1.29654	0.856536					2.331	31.336	0.0535145	8.40338					0.306	34.328	0.00702507	9.20575					32.396	2.507	0.859847	0.89534					9.939	5.058	0.164605	1.37222					6.53	8.318	0.173318	2.97066
			48.52	3.862	1.11391	1.03567					0.351	12.354	0.00805817	3.31298					0.303	46.522	0.00695619	12.4758					35.63	2.017	0.945683	0.720343					17.996	0.928	0.298041	0.251763					12.34	17.652	0.327525	6.30416
			55.348	3.106	1.27066	0.832937					0.165	4.872	0.00378803	1.30653					0.551	35.548	0.0126497	9.53292					44.718	2.46	1.18689	0.878554					5.364	4.456	0.0888359	1.2089					2.776	14.236	0.0736799	5.08419
			52.363	3.852	1.20214	1.03299					0.22	4.684	0.0050507	1.25611					2.059	25.24	0.04727	6.76862					32.993	2.168	0.875693	0.774271					31.592	1.54	0.523211	0.417797					0.797	5.983	0.0211538	2.13674
			52.946	4.073	1.21552	1.09226					4.964	25.4	0.113962	6.81153					0.51	38.31	0.0117084	10.2736					33.163	3.656	0.880205	1.30569					1.094	4.541	0.0181183	1.23196					5.09	11.041	0.135098	3.94314
			42.284	3.703	0.970745	0.993035					0.151	3.075	0.00346662	0.824624					0.347	44.965	0.00796634	12.0583					25.234	2.067	0.669755	0.7382					18.813	3.21	0.311572	0.870863					1.391	10.831	0.0369196	3.86814
			42.537	3.365	0.976553	0.902393					0.726	13.726	0.0166673	3.68091					52.623	4.969	1.20811	1.33254					40.858	2.439	1.08444	0.871054					17.668	1.87	0.292609	0.507325					0.914	8.198	0.0242592	2.9278
			45.856	3.628	1.05275	0.972922					0.527	7.84	0.0120987	2.10246					3.388	38.433	0.0777808	10.3066					27.659	2.153	0.734119	0.768914					7.23	1.69	0.11974	0.458492					0.197	28.262	0.00522873	10.0934
			55.798	3.512	1.281	0.941814					0.176	5.371	0.00404056	1.44034					0.369	24.179	0.00847141	6.48409					37.318	2.004	0.990486	0.7157					15.016	1.779	0.248688	0.482637					1.396	11.59	0.0370523	4.1392
			47.163	3.952	1.08276	1.05981					0.823	16.34	0.0188942	4.3819					0.438	37.519	0.0100555	10.0615					34.49	2.042	0.915426	0.729271					0.129	8.283	0.00213643	2.24715					0.16	0.321	0.00424668	0.114641
			40.603	3.675	0.932153	0.985526					0.203	7.098	0.00466042	1.90347					0.383	35.721	0.00879281	9.57931					29.173	3.15	0.774303	1.12498					0.093	4.083	0.00154022	1.1077					9.281	15.605	0.246334	5.57311
			43.612	3.691	1.00123	0.989817					0.21	33.425	0.00482113	8.96359					0.426	28.815	0.00978	7.72733					32.687	2.267	0.867571	0.809627					8.273	2.474	0.137013	0.671188					0.343	14.697	0.00910383	5.24883
			52.951	3.583	1.21564	0.960854					0.25	31.047	0.00573943	8.32588					0.839	29.192	0.0192615	7.82843					33.277	2.243	0.88323	0.801056					1.373	4.807	0.0227389	1.30412					2.668	15.323	0.0708134	5.47239
			55	3.583	1.26268	0.960854					2.155	11.597	0.0494739	3.10997					0.72	36.199	0.0165296	9.7075					27.337	2.044	0.725572	0.729986					12.915	1.287	0.213892	0.349159					0.185	0.509	0.00491023	0.181782
			43.685	3.097	1.00291	0.830523					0.209	12.724	0.00479817	3.4122					0.294	19.047	0.00674958	5.10784					31.989	2.113	0.849045	0.754628					4	11.563	0.066246	3.137					0.738	19.388	0.0195878	6.92415
			43.984	3.626	1.00977	0.972386					0.302	15.324	0.00693324	4.10944					0.628	31.74	0.0144175	8.51173					36.637	2.135	0.972411	0.762485					12.993	1.819	0.215184	0.493489					3.752	12.21	0.0995847	4.36063
			42.213	3.877	0.969115	1.0397					4.453	13.276	0.102231	3.56023					0.507	51.558	0.0116396	13.8263					17.64	1.753	0.468197	0.626059					11.798	4.192	0.195393	1.13728					1.252	8.996	0.0332303	3.21279
			59.198	3.457	1.35905	0.927065					1.003	11.61	0.0230266	3.11346					2.07	40.38	0.0475225	10.8287					34.028	2.637	0.903163	0.941767					10.388	2.857	0.172041	0.775095					1.796	17.43	0.047669	6.22488
			41.637	3.426	0.955891	0.918751					0.188	8.771	0.00431605	2.35212					0.568	33.575	0.01304	9.00382					33.661	2.4	0.893422	0.857126					0.871	4.263	0.0144251	1.15654					1.657	13.822	0.0439797	4.93633
			36.531	3.467	0.838669	0.929746					2.008	5.885	0.0460991	1.57818					0.403	29.274	0.00925197	7.85042					29.959	1.909	0.795165	0.681772					13.03	5.474	0.215796	1.48508					0.108	0.279	0.00286651	0.0996409
			39.762	3.288	0.912846	0.881744					0.881	12.534	0.0202258	3.36125					0.703	29.999	0.0161393	8.04484					35.081	2.428	0.931112	0.867126					2.791	2.674	0.0462231	0.725448					1.417	17.54	0.0376097	6.26416
			37.305	3.404	0.856438	0.912852					5.132	8.606	0.117819	2.30787					0.898	28.033	0.020616	7.51762					37.412	1.983	0.992981	0.7082					11.747	0.965	0.194548	0.261801					0.583	12.594	0.0154739	4.49777
			49.976	3.185	1.14734	0.854122					10.473	14.987	0.240436	4.01907					0.514	28.161	0.0118003	7.55194					24.229	2.138	0.64308	0.763557					0.703	22.736	0.0116427	6.1682					2.392	6.694	0.0634879	2.39067
			37.785	3.465	0.867458	0.92921					1.438	11.441	0.0330132	3.06814					10.747	24.944	0.246727	6.68924					31.665	2	0.840445	0.714272					34.025	8.235	0.563505	2.23413					0.218	35.67	0.00578611	12.739
			37.645	3.529	0.864244	0.946373					0.224	26.475	0.00514253	7.09981					0.858	29.038	0.0196977	7.78713					29.754	2.213	0.789724	0.790342					0.155	26.704	0.00256703	7.24471					2.747	13.41	0.0729102	4.78919
			43.644	3.92	1.00197	1.05123					5.188	2.349	0.119105	0.629932					1.058	32.722	0.0242893	8.77507					38.878	1.655	1.03189	0.59106					0.493	4.091	0.00816482	1.10988					7.03	13.969	0.186589	4.98883
			50.607	3.535	1.16182	0.947982					0.173	21.475	0.00397169	5.75896					0.55	49.487	0.0126268	13.2709					32.25	3.194	0.855972	1.14069					6.532	7.844	0.10818	2.12805					14.263	22.149	0.378565	7.9102
			36.884	3.309	0.846773	0.887376					0.189	29.436	0.00433901	7.89386					1.106	30.606	0.0253913	8.20762					33.536	2.672	0.890105	0.954267					0.948	10.861	0.0157003	2.94655					1.097	15.337	0.0291163	5.47739
			33.827	3.713	0.776591	0.995716					0.173	20.221	0.00397169	5.42267					0.47	14.648	0.0107901	3.92816					40.806	2.194	1.08306	0.783556					0.132	21.113	0.00218612	5.72789					8.82	22.447	0.234098	8.01663
			37.103	3.717	0.851801	0.996789					6.462	12.161	0.148353	3.26122					0.317	34.715	0.0072776	9.30953					31.622	2.399	0.839304	0.856769					0.154	25.766	0.00255047	6.99023					0.819	29.588	0.0217377	10.5669
			48.927	3.063	1.12325	0.821406					0.447	22.815	0.0102621	6.11831					0.192	22.381	0.00440789	6.00192					38.89	1.741	1.03221	0.621774					0.144	3.794	0.00238486	1.0293					0.488	23.454	0.0129524	8.37626
			36.51	3.138	0.838187	0.841518					0.22	26.995	0.0050507	7.23926					1.037	46.349	0.0238072	12.4294					31.772	2.285	0.843285	0.816055					6.151	7.883	0.10187	2.13863					2.71	18.333	0.0719282	6.54737
			38.86	3.486	0.892138	0.934842					1.741	11.701	0.0399694	3.13786					1.215	33.642	0.0278937	9.02179					34.569	1.846	0.917522	0.659273					0.095	21.393	0.00157334	5.80385					0.453	23.085	0.0120234	8.24448
			49.341	3.875	1.13276	1.03916					0.284	3.019	0.00652	0.809606					0.22	19.339	0.0050507	5.18615					27.172	1.949	0.721193	0.696058					0.119	20.984	0.00197082	5.69289					0.274	15.832	0.00727244	5.65418
			42.533	3.325	0.976461	0.891666					0.089	15.443	0.00204324	4.14135					0.47	18.049	0.0107901	4.84021					34.642	3.613	0.91946	1.29033					0.145	25.723	0.00240142	6.97857					1.241	12.017	0.0329383	4.2917
			36.92	3.349	0.8476	0.898102					1.379	25.49	0.0316587	6.83566					0.705	37.342	0.0161852	10.014					30.13	1.87	0.799703	0.667844					0.14	3.336	0.00231861	0.905046					1.586	12.603	0.0420952	4.50098
			33.912	3.387	0.778543	0.908293					0.234	26.728	0.00537211	7.16766					1.481	28.08	0.0340004	7.53022					35.708	2.207	0.947753	0.788199					0.311	17.279	0.00515063	4.68774					0.345	1.081	0.00915691	0.386064
			43.536	3.486	0.999488	0.934842					0.162	13.79	0.00371915	3.69807					1.05	33.768	0.0241056	9.05557					33.261	1.95	0.882806	0.696415					12.179	5.538	0.201703	1.50244					2.67	16.827	0.0708665	6.00953
			37.665	4.011	0.864703	1.07563					0.225	15.523	0.00516549	4.16281					1.635	24.622	0.0375359	6.60289					37.812	2.256	1.0036	0.805699					0.162	5.073	0.00268296	1.37629					1.771	22.818	0.0470055	8.14913
			43.481	3.733	0.998225	1.00108					0.228	21.001	0.00523436	5.63184					0.358	34.624	0.00821887	9.28513					39.554	1.997	1.04983	0.7132					0.147	23.834	0.00243454	6.46609					5.094	11.708	0.135204	4.18135
			28.659	3.608	0.657946	0.967558					0.495	18.399	0.0113641	4.93407					0.357	32.243	0.00819591	8.64662					33.774	2.014	0.896422	0.719272					1.143	18.126	0.0189298	4.91753					1.067	13.008	0.0283201	4.64562
			45.133	3.687	1.03615	0.988744					0.194	14.695	0.0044538	3.94076					0.311	35.133	0.00713986	9.42163					38.78	2.636	1.02929	0.94141					0.136	27.019	0.00225236	7.33017					1.002	12.149	0.0265949	4.33884
			38.204	3.676	0.877077	0.985794					0.274	28.811	0.00629042	7.72625					2.046	35.371	0.0469715	9.48545					44.467	3.307	1.18023	1.18105					0.207	23.97	0.00342823	6.50298					1.457	15.838	0.0386714	5.65632
			45.143	3.59	1.03638	0.962731					0.315	17.412	0.00723169	4.66938					0.414	29.807	0.0095045	7.99335					36.105	1.839	0.958291	0.656773					0.256	18.463	0.00423974	5.00895					7.054	15.916	0.187226	5.68417
			26.822	3.224	0.615772	0.864581					0.182	28.897	0.00417831	7.74932					1.135	40.99	0.026057	10.9923					29.985	1.909	0.795855	0.681772					41.234	4.549	0.682897	1.23413					1.644	14.907	0.0436347	5.32382
			40.825	3.693	0.93725	0.990353					0.243	16.711	0.00557873	4.48139					0.706	21.624	0.0162082	5.79891					0.231	0.55	0.00613115	0.196425					0.182	25.868	0.00301419	7.01791					7.21	3.422	0.191366	1.22212
			36.663	3.716	0.8417	0.996521					21.736	7.364	0.499009	1.97481					0.445	48.127	0.0102162	12.9062					35.328	1.745	0.937668	0.623202					0.177	29.647	0.00293139	8.04314					0.261	1.589	0.0069274	0.567489
			33.498	3.634	0.769038	0.974531					0.089	13.88	0.00204324	3.7222					0.31	33.719	0.0071169	9.04243					48.797	3.659	1.29516	1.30676					0.558	20.161	0.00924132	5.46961					2.263	11.171	0.060064	3.98956
			38.716	3.825	0.888832	1.02575					1.605	22.202	0.0368472	5.95392					17.808	22.397	0.408831	6.00621					34.511	1.945	0.915983	0.694629					0.154	5.108	0.00255047	1.38578					1.381	13.734	0.0366542	4.9049
			29.53	4.569	0.677942	1.22527					0.231	24.249	0.00530324	6.50286					1.368	28.598	0.0314062	7.66913					40.515	2.753	1.07534	0.983195					0.501	19.367	0.00829731	5.25421					1.334	11.37	0.0354067	4.06063
			30.448	3.572	0.699017	0.957904					0.215	16.166	0.00493591	4.33524					0.845	30.641	0.0193993	8.21701					29.931	2.019	0.794422	0.721057					0.158	6.926	0.00261672	1.879					1.557	12.796	0.0413255	4.56991
			42.479	3.548	0.975222	0.951468					7.396	7.686	0.169795	2.06116					0.397	13.738	0.00911422	3.68412					43.305	1.987	1.14939	0.709629					0.234	3.585	0.00387539	0.972599					4.572	8.45	0.121349	3.0178
			40.38	3.851	0.927033	1.03272					0.175	9.66	0.0040176	2.59053					0.355	40.541	0.00815	10.8719					46.634	2.396	1.23775	0.855698					0.181	5.737	0.00299763	1.55643					0.749	23.139	0.0198798	8.26377
			42.1	3.591	0.966521	0.963					0.325	11.071	0.00746127	2.96891					0.322	37.273	0.00739239	9.99551					42.316	2.159	1.12314	0.771056					0.604	2.937	0.0100031	0.796799					14.668	7.961	0.389315	2.84316
			46.774	3.209	1.07383	0.860559					1.704	25.269	0.03912	6.7764					22.896	28.071	0.52564	7.52781					8.831	0.845	0.23439	0.30178					17.57	3.454	0.290986	0.937059					0.888	17.047	0.0235691	6.0881
			37.968	3.533	0.871659	0.947446					0.155	27.411	0.00355845	7.35082					0.625	20.946	0.0143486	5.6171					40.133	3.285	1.0652	1.17319					0.288	3.396	0.00476971	0.921324					3.521	7.288	0.0934536	2.60281
			36.526	3.152	0.838554	0.845273					0.234	5.15	0.00537211	1.38108					1.271	34.107	0.0291793	9.14648					35.011	2.046	0.929254	0.7307					35.222	4.096	0.583329	1.11123					1.231	18.822	0.0326729	6.72201
			34.476	3.56	0.791491	0.954686					0.18	6.156	0.00413239	1.65086					0.865	32.093	0.0198584	8.60639					40.093	2.403	1.06414	0.858198					0.214	1.315	0.00354416	0.356755					1.767	13.643	0.0468993	4.8724
			46.475	3.245	1.06696	0.870213					0.225	10.335	0.00516549	2.77154					1.968	29.955	0.0451808	8.03304					36.344	1.973	0.964634	0.704629					22.943	7.687	0.379971	2.08546					4.933	7.057	0.130931	2.52031
			38.861	3.758	0.892161	1.00778					0.217	30.891	0.00498183	8.28405					0.403	37.482	0.00925197	10.0516					36.315	2.236	0.963864	0.798556					35.961	5.516	0.595568	1.49647					30.47	1.257	0.808728	0.44892
			36.855	3.945	0.846107	1.05793					5.704	13.792	0.130951	3.6986					0.639	27.742	0.01467	7.43958					35.891	2.17	0.952611	0.774985					0.185	2.819	0.00306388	0.764786					33.778	1.161	0.896528	0.414635
			37.846	3.506	0.868859	0.940205					0.134	14.447	0.00307634	3.87426					0.347	2.311	0.00796634	0.619742					52.808	3.617	1.40162	1.29176					0.133	18.666	0.00220268	5.06403					17.889	1.111	0.474806	0.396778
			41.788	3.928	0.959358	1.05337					0.134	3.607	0.00307634	0.96729					0.556	38.851	0.0127645	10.4187					39.938	2.985	1.06003	1.06605					0.396	21.343	0.00655835	5.79029					0.672	24.107	0.0178361	8.60947
			39.857	3.1	0.915027	0.831328					0.222	17.136	0.00509662	4.59537					0.365	35.059	0.00837957	9.40178					44.991	2.915	1.19414	1.04105					0.144	17.071	0.00238486	4.63131					4.761	16.299	0.126365	5.82096
			40.939	3.076	0.939867	0.824892					31.006	16.813	0.711828	4.50875					0.513	42.252	0.0117773	11.3307					41.292	2.534	1.09596	0.904982					0.215	20.294	0.00356072	5.5057					0.479	17.317	0.0127135	6.18452
			38.572	3.777	0.885526	1.01288					0.652	20.222	0.0149684	5.42294					0.821	31.49	0.0188483	8.44468					27.515	1.532	0.730297	0.547132					0.162	16.938	0.00268296	4.59523					2.844	16.982	0.0754848	6.06488
			16.515	28.138	0.379147	7.54578					2.616	20.564	0.0600574	5.51465					0.561	24.46	0.0128793	6.55945					16.155	2.352	0.428782	0.839984					0.083	15.783	0.0013746	4.28188					0.391	19.107	0.0103778	6.8238
			33.259	3.626	0.763551	0.972386					3.949	13.375	0.0906601	3.58678					0.69	37.76	0.0158408	10.1261					41.114	2.855	1.09124	1.01962					0.15	16.786	0.00248423	4.55399					4.742	10.164	0.125861	3.62993
			34.69	3.765	0.796404	1.00966					0.364	22.16	0.00835662	5.94265					0.436	46.426	0.0100096	12.4501					31.583	1.701	0.838269	0.607488					0.192	13.135	0.00317981	3.56348					0.555	16.982	0.0147307	6.06488
			24.101	11.595	0.553304	3.10943					0.19	10.108	0.00436197	2.71067					0.525	35.366	0.0120528	9.48411					35.324	1.573	0.937561	0.561775					0.139	8.566	0.00230205	2.32393					0.966	21.387	0.0256393	7.63807
			32.442	3.645	0.744795	0.977481					2.331	30.49	0.0535145	8.17651					1.475	38.459	0.0338627	10.3136					32	2	0.849337	0.714272					0.182	14.082	0.00301419	3.8204					1.186	16.158	0.0314785	5.7706
			25.472	3.371	0.58478	0.904002					1.244	8.49	0.0285594	2.27677					0.586	32.783	0.0134532	8.79143					34.326	1.918	0.911073	0.684987					0.128	15.861	0.00211987	4.30304					0.909	21.219	0.0241265	7.57807
			13.692	25.627	0.314337	6.8724					0.143	3.287	0.00328296	0.881476					0.615	34.839	0.014119	9.34279					47.613	2.935	1.26373	1.04819					0.148	16.892	0.0024511	4.58275					2.237	18.443	0.0593739	6.58666
			36.551	3.51	0.839128	0.941278					4.441	23.703	0.101955	6.35644					0.544	42.789	0.012489	11.4747					29.643	1.95	0.786778	0.696415					0.154	3.969	0.00255047	1.07678					2.306	9.653	0.0612053	3.44743
			41.105	3.427	0.943678	0.91902					0.137	3.48	0.00314521	0.933233					2.168	44.621	0.0497724	11.966					30.72	1.596	0.815363	0.569989					0.118	8.836	0.00195426	2.39718					12.401	1.813	0.329144	0.647487
			13.137	40.244	0.301596	10.7922					0.767	14.211	0.0176086	3.81097					0.672	44.618	0.0154276	11.9652					18.721	2.143	0.496888	0.765342					0.212	20.129	0.00351104	5.46093					2.369	11.501	0.0628774	4.10742
			37.781	4.027	0.867366	1.07992					0.528	6.853	0.0121217	1.83777					0.39	39.487	0.00895352	10.5892					35.506	1.874	0.942392	0.669273					0.114	9.631	0.00188801	2.61286					6.375	12.619	0.169204	4.5067
			37.441	3.529	0.859561	0.946373					0.84	16.973	0.0192845	4.55165					0.91	30.479	0.0208915	8.17356					34.784	1.738	0.923229	0.620702					0.115	9.98	0.00190457	2.70754					45.045	1.096	1.19557	0.391421
			31.804	4.046	0.730148	1.08502					0.147	6.461	0.00337479	1.73265					0.943	44.777	0.0216491	12.0079					51.832	3.591	1.37571	1.28247					4.742	7.869	0.0785346	2.13483					1.708	15.953	0.0453333	5.69739
			35.968	3.671	0.825744	0.984453					13.253	5.824	0.304259	1.56182					0.688	40.482	0.0157949	10.8561					33.616	2.202	0.892228	0.786413					0.179	23.002	0.00296451	6.24037					44.051	1.077	1.16919	0.384635
			34.219	3.418	0.785591	0.916606					0.229	6.631	0.00525732	1.77824					0.677	39.16	0.0155424	10.5015					48.487	2.562	1.28693	0.914982					0.186	14.674	0.00308044	3.98101					0.747	15.58	0.0198267	5.56418
			19.508	16.132	0.44786	4.32612					0.495	8.761	0.0113641	2.34944					0.383	38.348	0.00879281	10.2838					43.502	2.237	1.15462	0.798913					0.108	10.285	0.00178864	2.79029					1.825	6.756	0.0484387	2.41281
			33.565	3.357	0.770576	0.900248					0.108	21.018	0.00247944	5.6364					0.402	41.797	0.00922901	11.2087					40.874	1.93	1.08487	0.689272					0.155	18.872	0.00256703	5.11991					5.547	20.021	0.147227	7.15022
			25.853	16.522	0.593526	4.43071					13.662	2.264	0.313649	0.607138					1.099	36.996	0.0252306	9.92123					40.292	2.958	1.06942	1.05641					0.062	5.309	0.00102681	1.44031					2.845	11.135	0.0755113	3.97671
			31.646	2.941	0.726521	0.788689					15.025	1.756	0.34494	0.470907					0.534	56.042	0.0122594	15.0288					32.252	2.128	0.856025	0.759985					2.781	6.307	0.0460575	1.71107					0.859	12.494	0.0227994	4.46206
			29.388	2.983	0.674682	0.799952					23.482	5.066	0.539094	1.35855					0.673	40.799	0.0154506	10.9411					37.732	2.062	1.00147	0.736414					0.198	27.851	0.00327918	7.55589					22.579	15.153	0.599287	5.41168
			39.941	3.812	0.916955	1.02227					26.893	5.616	0.617402	1.50604					2.624	31.853	0.0602411	8.54203					35.561	2.133	0.943852	0.761771					0.144	14.904	0.00238486	4.04341					8.132	7.077	0.215838	2.52745
			35.953	3.335	0.8254	0.894348					3.938	2.612	0.0904076	0.700461					0.582	39.831	0.0133614	10.6815					39.295	3.027	1.04296	1.08105					0.205	26.155	0.00339511	7.09577					3.438	1.088	0.0912506	0.388564
			14.981	24.143	0.34393	6.47444					0.194	12.039	0.0044538	3.2285					0.672	46.546	0.0154276	12.4823					36.341	1.996	0.964554	0.712843					0.142	22.637	0.00235173	6.14135					6.895	2.135	0.183005	0.762485
			31.819	3.865	0.730492	1.03648					2.782	6.885	0.0638684	1.84635					1.216	54.602	0.0279166	14.6426					48.979	2.72	1.29999	0.97141					0.088	6.207	0.00145741	1.68394					2.058	11.854	0.054623	4.23349
			12.227	20.258	0.280704	5.43259					12.485	3.071	0.286627	0.823551					1.053	37.957	0.0241745	10.1789					41.578	2.672	1.10355	0.954267					0.256	23.381	0.00423974	6.34319					11.69	3.284	0.310273	1.17283
			33.96	2.972	0.779645	0.797002					0.615	8.713	0.014119	2.33657					0.527	5.635	0.0120987	1.51114					36.285	2.922	0.963068	1.04355					5.636	11.538	0.0933406	3.13022					15.827	8.789	0.420077	3.13887
			14.94	28.773	0.342989	7.71606					28.843	8.878	0.66217	2.38082					0.683	45.82	0.0156801	12.2876					46.811	2.692	1.24245	0.96141					0.734	7.62	0.0121561	2.06728					1.51	18.296	0.0400781	6.53416
			33.696	3.32	0.773584	0.890325					17.45	11.231	0.400613	3.01182					1.29	36.71	0.0296155	9.84453					43.539	2.796	1.1556	0.998552					0.221	34.745	0.00366009	9.42621					1.273	10.559	0.0337877	3.771
			33.905	3.509	0.778382	0.94101					1.41	6.699	0.0323704	1.79647					1.718	32.244	0.0394414	8.64688					0.347	2.632	0.00920999	0.939982					0.128	14.87	0.00211987	4.03418					0.49	15.336	0.0130055	5.47704
			31.029	2.951	0.712356	0.791371					0.799	2.788	0.0183432	0.747659					0.539	43.162	0.0123742	11.5748					59.616	3.46	1.58231	1.23569					0.13	12.638	0.002153	3.42865					22.688	14.774	0.60218	5.27633
			30.087	3.628	0.690729	0.972922					0.207	19.676	0.00475225	5.27652					0.373	45.605	0.00856324	12.2299					38.996	2.622	1.03502	0.93641					0.368	23.314	0.00609463	6.32501					0.879	12.948	0.0233302	4.6242
			33.227	3.445	0.762817	0.923847					0.219	15.353	0.00502774	4.11722					1.091	37.795	0.0250469	10.1355					39.261	2.412	1.04206	0.861412					0.078	8.49	0.0012918	2.30331					1.984	10.534	0.0526589	3.76207
			39.88	3.299	0.915555	0.884694					0.203	22.463	0.00466042	6.02391					1.478	36.999	0.0339315	9.92203					0.213	1.921	0.0056534	0.686058					1.248	17.866	0.0206688	4.84699					0.735	8.107	0.0195082	2.8953
			20.911	3.337	0.480069	0.894884					0.383	8.21	0.00879281	2.20168					1.836	28.014	0.0421504	7.51252					44.05	2.382	1.16916	0.850698					0.163	14.408	0.00269952	3.90884					5.167	0.584	0.137141	0.208567
			35.245	3.413	0.809145	0.915265					28.169	7.963	0.646697	2.13544					2.005	38.458	0.0460303	10.3133					0.279	2.36	0.00740515	0.842841					0.092	15.23	0.00152366	4.13185					2.68	16	0.0711319	5.71417
			26.733	5.578	0.613729	1.49585					0.144	15.468	0.00330591	4.14806					1.862	36.861	0.0427473	9.88503					42.807	3.433	1.13617	1.22605					1.447	30.759	0.0239645	8.34482					0.825	18.004	0.021897	6.42987
			26.195	12.956	0.601378	3.47441					41.505	2.806	0.952861	0.752486					1.322	43.351	0.0303501	11.6255					45.295	3.749	1.20221	1.3389					0.141	14.684	0.00233517	3.98372					2.888	18.388	0.0766526	6.56701
			36.307	3.639	0.833527	0.975872					14.033	2.854	0.322166	0.765358					1.775	49.546	0.04075	13.2868					49.786	3.438	1.32141	1.22783					0.135	6.68	0.0022358	1.81226					3.288	20.499	0.0872693	7.32093
			34.761	3.453	0.798034	0.925992					0.156	15.593	0.00358141	4.18158					2.51	4.314	0.0576239	1.15689					47.468	3.701	1.25988	1.32176					0.161	9.074	0.0026664	2.46175					6.617	1.817	0.175627	0.648916
			38.103	3.905	0.874759	1.04721					7.694	2	0.176637	0.536341					0.485	52.777	0.0111345	14.1532					39.324	2.956	1.04373	1.05569					0.202	12.075	0.00334542	3.27591					0.591	27.646	0.0156862	9.87338
			32.354	3.125	0.742775	0.838032					19.468	2.996	0.446941	0.803438					0.904	29.013	0.0207538	7.78043					44.717	3.308	1.18687	1.18141					0.158	19.653	0.00261672	5.3318					1.617	20.014	0.042918	7.14772
			37.086	3.283	0.851411	0.880403					33.14	6.062	0.760819	1.62565					0.582	33.188	0.0133614	8.90004					45.927	2.968	1.21898	1.05998					0.197	31.369	0.00326262	8.51031					10.273	11.938	0.272664	4.26349
			35.552	3.042	0.816194	0.815774					5.768	3.484	0.13242	0.934305					0.638	35.808	0.014647	9.60264					39.18	2.565	1.03991	0.916054					0.147	22.44	0.00243454	6.0879					0.695	14.921	0.0184465	5.32882
			28.636	7.66	0.657418	2.05418					9.107	3.329	0.209076	0.892739					0.521	30.651	0.011961	8.21969					52.195	3.292	1.38535	1.17569					0.169	20.762	0.00279889	5.63266					1.292	13.094	0.034292	4.67634
			25.805	6.836	0.592424	1.83321					0.127	15.554	0.00291563	4.17112					1.94	4.846	0.044538	1.29955					43.45	2.969	1.15324	1.06034					0.145	12.117	0.00240142	3.2873					28.504	1.288	0.756547	0.459991
			24.666	2.883	0.566276	0.773135					1.2	17.159	0.0275493	4.60153					1.238	29.321	0.0284217	7.86302					36.33	2.944	0.964262	1.05141					0.244	24.951	0.00404101	6.76913					3.127	10.897	0.0829961	3.89171
			48.803	3.169	1.12041	0.849832					0.179	19.701	0.00410944	5.28322					0.561	34.34	0.0128793	9.20897					37.201	2.509	0.98738	0.896054					0.159	18.199	0.00263328	4.93733					0.584	11.746	0.0155004	4.19492
			39.963	3.012	0.91746	0.807729					18.732	2.46	0.430044	0.659699					0.382	40.319	0.00876986	10.8124					46.899	3.064	1.24478	1.09426					0.133	6.237	0.00220268	1.69208					2.858	18.669	0.0758564	6.66737
			35.162	3.059	0.80724	0.820333					16.196	1.728	0.371824	0.463398					1.611	36.064	0.0369849	9.67129					32.978	2.519	0.875294	0.899625					0.346	17.4	0.00573028	4.72056					4.442	18.288	0.117899	6.5313
			29.717	3.046	0.682235	0.816847					5.476	2.55	0.125717	0.683834					0.619	35.271	0.0142108	9.45863					50.316	3.034	1.33548	1.08355					0.181	23.536	0.00299763	6.38524					1.623	11.383	0.0430773	4.06528
			16.242	31.331	0.37288	8.40204					0.169	17.509	0.00387986	4.69539					1.296	47.832	0.0297532	12.8271					36.942	2.982	0.980506	1.06498					0.188	21.486	0.00311356	5.82908					4.959	8.605	0.131621	3.07315
			31.627	3.806	0.726084	1.02066					0.163	20.767	0.00374211	5.56909					1.3	35.484	0.0298451	9.51576					37.87	2.702	1.00514	0.964981					0.204	17.331	0.00337855	4.70184					3.438	18.75	0.0912506	6.6963
			21.021	3.772	0.482595	1.01154					0.167	27.14	0.00383394	7.27814					0.855	34.611	0.0196289	9.28164					30.813	3.626	0.817831	1.29497					24.574	13.304	0.406982	3.60933					5.76	9.132	0.152881	3.26136
			12.05	43.574	0.276641	11.6853					0.181	19.966	0.00415535	5.35429					1.686	45.497	0.0387067	12.2009					38.453	2.345	1.02061	0.837484					0.173	26.856	0.00286514	7.28595					2.976	10.889	0.0789883	3.88885
			45.948	5.669	1.05486	1.52026					4.899	10.868	0.11247	2.91447					4.585	5.236	0.105261	1.40414					34.175	2.995	0.907065	1.06962					21.133	12.649	0.349994	3.43163					3.416	14.555	0.0906667	5.19811
			32.396	2.974	0.743739	0.797538					0.36	19.883	0.00826479	5.33203					1.276	38.255	0.0292941	10.2589					44.213	3.07	1.17349	1.09641					0.155	31.123	0.00256703	8.44357					1.894	13.027	0.0502701	4.65241
			44.034	3.838	1.01092	1.02924					0.156	23.668	0.00358141	6.34705					0.431	33.276	0.00989479	8.92364					33.046	2.619	0.877099	0.935339					0.159	21.257	0.00263328	5.76696					4.636	12.243	0.123048	4.37241
			0.229	3.322	0.00525732	0.890862					1.735	10.981	0.0398317	2.94478					0.351	36.449	0.00805817	9.77454					30.43	2.664	0.807666	0.95141					0.919	20.632	0.01522	5.5974					1.332	18.034	0.0353536	6.44059
			44.232	3.268	1.01547	0.876381					0.183	29.129	0.00420127	7.81153					6.746	5.634	0.154873	1.51087					34.743	2.337	0.922141	0.834627					0.913	14.489	0.0151207	3.93082					5.231	19.863	0.13884	7.09379
			32.693	3.266	0.750557	0.875844					0.257	3.137	0.00590014	0.84125					1.389	29.312	0.0318883	7.86061					45.986	2.807	1.22055	1.00248					0.515	22.652	0.00852917	6.14542					0.661	16.421	0.0175441	5.86453
			35.356	3.456	0.811694	0.926797					0.104	15.18	0.0023876	4.07083					0.495	44.353	0.0113641	11.8942					39.986	2.914	1.0613	1.04069					1.133	16.007	0.0187642	4.34265					0.926	15.902	0.0245777	5.67917
			37.561	3.274	0.862316	0.87799					1.249	23.306	0.0286742	6.24998					0.683	44.521	0.0156801	11.9392					43.663	3.586	1.15889	1.28069					0.155	22.359	0.00256703	6.06593					8.367	6.635	0.222075	2.3696
			43.791	3.634	1.00534	0.974531					0.232	22.288	0.0053262	5.97698					0.448	46.117	0.0102851	12.3672					55.478	2.975	1.47248	1.06248					0.603	22.286	0.00998659	6.04612					0.29	8.468	0.00769711	3.02423
			32.641	3.406	0.749364	0.913388					14.377	7.295	0.330063	1.9563					19.882	19.936	0.456446	5.34624					37.962	2.592	1.00758	0.925696					0.237	11.866	0.00392508	3.21921					0.993	20.333	0.026356	7.26164
			22.862	3.062	0.52486	0.821137					0.171	12.982	0.00392577	3.48139					0.663	4.369	0.015221	1.17164					44.828	2.483	1.18981	0.886768					0.204	15.361	0.00337855	4.16739					3.325	11.611	0.0882514	4.1467
			39.044	3.316	0.896362	0.889253					0.254	14.347	0.00583127	3.84744					0.392	39.166	0.00899943	10.5032					24.56	2.465	0.651866	0.88034					0.134	14.78	0.00221924	4.00977					0.683	11.566	0.018128	4.13063
			32.83	2.934	0.753703	0.786812					9.043	11.247	0.207607	3.01611					0.373	43.256	0.00856324	11.6					28.656	2.281	0.760581	0.814627					0.175	17.059	0.00289826	4.62805					4.013	5.411	0.106512	1.93246
			42.45	3.38	0.974556	0.906416					4.694	5.426	0.107764	1.45509					1.668	49.264	0.0382935	13.2111					38.425	2.824	1.01987	1.00855					0.166	27.917	0.00274921	7.57379					1.251	26.919	0.0332038	9.61374
			39.322	3.143	0.902744	0.842859					0.138	27.58	0.00316817	7.39614					0.359	50.09	0.00824183	13.4327					26.545	2.261	0.704551	0.807484					0.168	14.947	0.00278233	4.05507					4.152	4.407	0.110201	1.5739
			37.751	2.927	0.866678	0.784934					0.144	25.702	0.00330591	6.89251					1.744	50.401	0.0400383	13.5161					41.063	3.119	1.08988	1.11391					0.258	32.784	0.00427287	8.89419					1.188	22.452	0.0315316	8.01841
			49.103	3.218	1.12729	0.862972					0.48	19.106	0.0110197	5.12366					13.073	5.123	0.300127	1.37384					35.123	2.414	0.932226	0.862126					0.123	17.996	0.00203706	4.88226					2.233	12.024	0.0592678	4.2942
			42.736	3.344	0.981122	0.896761					0.292	29.476	0.00670366	7.90459					1.45	39.068	0.0332887	10.4769					32.701	2.398	0.867942	0.856412					0.122	7.948	0.0020205	2.15627					15.93	0.272	0.42281	0.097141
			43.773	3.169	1.00493	0.849832					0.284	16.012	0.00652	4.29394					0.356	43.079	0.00817295	11.5525					29.592	2.299	0.785424	0.821055					0.133	11.268	0.00220268	3.05697					25.785	0.232	0.684379	0.0828555
			20.923	2.785	0.480345	0.746854					0.167	29.052	0.00383394	7.79088					16.478	4.598	0.378298	1.23305					38.17	2.685	1.0131	0.95891					0.223	25.278	0.00369321	6.85784					24.52	1.27	0.650804	0.453563
			0.194	3.896	0.0044538	1.04479					0.161	30.305	0.0036962	8.1269					0.457	48.39	0.0104917	12.9768					30.493	2.692	0.809338	0.96141					0.145	13.748	0.00240142	3.72979					15.168	0.279	0.402586	0.0996409
			50.088	3.263	1.14991	0.87504					0.062	11.964	0.00142338	3.20839					1.914	55.095	0.0439411	14.7748					28.722	2.834	0.762333	1.01212					0.138	14.921	0.00228549	4.04802					2.868	16.45	0.0761218	5.87489
			37.87	2.824	0.86941	0.757313					1.564	20.709	0.0359059	5.55354					0.393	36.885	0.00902239	9.89146					47.699	2.983	1.26602	1.06534					0.197	25.968	0.00326262	7.04504					31.585	1.536	0.838322	0.548561
			37.444	3.835	0.85963	1.02843					8.794	6.454	0.20189	1.73077					8.881	4.477	0.203888	1.2006					36.101	2.607	0.958184	0.931053					0.13	17.823	0.002153	4.83532					12.154	1.655	0.322589	0.59106
			35.956	4.105	0.825468	1.10084					0.22	21.84	0.0050507	5.85684					1.409	8.187	0.0323475	2.19551					40.658	2.945	1.07914	1.05177					0.269	34.492	0.00445504	9.35757					32.15	1.234	0.853318	0.440706
			29.019	3.329	0.666211	0.892739					0.114	8.011	0.00261718	2.14831					1.36	35.921	0.0312225	9.63295					28.864	2.335	0.766102	0.833912					0.206	19.884	0.00341167	5.39447					22.969	1.586	0.609638	0.566418
			42.741	3.094	0.981237	0.829719					0.169	22.411	0.00387986	6.00996					1.838	8.43	0.0421963	2.26068					33.542	2.565	0.890264	0.916054					0.151	17.768	0.00250079	4.8204					2.567	13.855	0.0681327	4.94812
			44.473	2.777	1.021	0.744709					0.151	18.837	0.00346662	5.05152					0.345	34.46	0.00792042	9.24115					31.213	2.396	0.828448	0.855698					0.18	16.952	0.00298107	4.59902					29.839	0.302	0.79198	0.107855
			41.159	3.154	0.944918	0.845809					0.404	17.279	0.00927493	4.63371					5.798	18.515	0.133109	4.96517					28.402	2.241	0.753839	0.800342					0.133	12.941	0.00220268	3.51085					2.193	12.866	0.0582061	4.59491
			40.762	3.696	0.935803	0.991157					0.13	19.362	0.00298451	5.19231					0.529	45.427	0.0121446	12.1822					28.685	1.901	0.761351	0.678915					0.22	31.383	0.00364353	8.51411					2.272	17.036	0.0603029	6.08417
			44.542	2.995	1.02258	0.80317					12.09	9.915	0.277559	2.65891					0.528	43.476	0.0121217	11.659					36.922	2.696	0.979975	0.962838					0.132	11.466	0.00218612	3.11069					2.533	8.223	0.0672303	2.93673
			44.171	3.321	1.01407	0.890594					0.305	14.568	0.00700211	3.9067					14.781	4.097	0.339338	1.09869					33.189	1.953	0.880895	0.697486					0.303	31.008	0.00501813	8.41237					0.589	18.744	0.0156331	6.69415
			34.432	2.771	0.790481	0.7431					0.221	31.067	0.00507366	8.33125					0.675	39.304	0.0154965	10.5402					28.197	1.929	0.748398	0.688915					0.478	12.058	0.0079164	3.2713					11.616	0.294	0.308309	0.104998
			44.358	3.104	1.01836	0.832401					2.673	9.737	0.061366	2.61117					0.333	38.381	0.00764493	10.2926					35.435	2.556	0.940508	0.912839					0.097	11.3	0.00160647	3.06565					0.491	16.569	0.013032	5.91738
			44.635	2.85	1.02472	0.764285					2.728	15.123	0.0626287	4.05554					0.333	45.92	0.00764493	12.3144					20.346	2.321	0.540019	0.828912					0.11	17.904	0.00182177	4.8573					27.789	0.314	0.737569	0.112141
			32.832	2.773	0.753748	0.743636					24.625	5.785	0.565334	1.55137					0.344	46.444	0.00789746	12.4549					29.248	2.344	0.776294	0.837127					0.17	15.117	0.00281546	4.10119					13.872	1.533	0.368187	0.547489
			34.121	2.989	0.783341	0.801561					0.175	22.684	0.0040176	6.08318					0.385	52.083	0.00883873	13.9671					31.218	2.857	0.828581	1.02034					0.272	36.934	0.00450473	10.0201					19.16	1.355	0.50854	0.483919
			38.548	3.033	0.884975	0.813361					0.218	22.158	0.00500479	5.94212					0.678	44.141	0.0155653	11.8373					23.165	2.359	0.61484	0.842484					0.169	13.193	0.00279889	3.57922					3.715	18.042	0.0986027	6.44345
			38.31	3.431	0.879511	0.920092					1.706	22.169	0.0391659	5.94507					1.129	28.077	0.0259193	7.52942					35.553	2.248	0.943639	0.802841					4.992	14.106	0.082675	3.82691					10.187	1.466	0.270381	0.523561
			40.447	3.071	0.928572	0.823551					23.765	13.993	0.545591	3.75251					0.402	11.88	0.00922901	3.18586					26.769	2.009	0.710497	0.717486					5.488	16.962	0.0908895	4.60174					6.715	1.692	0.178228	0.604274
			37.245	4.399	0.855061	1.17968					0.161	18.844	0.0036962	5.0534					0.499	41.025	0.0114559	11.0017					35.049	2.436	0.930262	0.869983					0.195	26.199	0.00322949	7.1077					2.311	5.489	0.061338	1.96032
			29.631	3.207	0.680261	0.860022					0.296	24.042	0.00679549	6.44735					0.405	43.584	0.00929788	11.6879					33.295	2.188	0.883708	0.781413					0.136	11.258	0.00225236	3.05426					1.675	8.926	0.0444575	3.18779
			45.759	3.021	1.05052	0.810142					44.911	9.477	1.03105	2.54145					0.68	39.96	0.0156113	10.7161					28.89	2.413	0.766792	0.861769					0.162	14.626	0.00268296	3.96799					2.098	8.573	0.0556846	3.06173
			37.034	2.184	0.850217	0.585684					0.133	13.258	0.00305338	3.5554					3.004	22.69	0.068965	6.08478					26.251	2.076	0.696748	0.741414					0.165	23.458	0.00273265	6.36408					2.723	16.976	0.0722732	6.06274
			41.088	2.421	0.943288	0.64924					0.283	33.342	0.00649704	8.94133					0.437	30.101	0.0100325	8.07219					26.103	2.011	0.69282	0.7182					1.632	34.262	0.0270284	9.29517					2.934	24.453	0.0778735	8.73304
			31.985	2.381	0.734303	0.638513					0.343	16.003	0.0078745	4.29153					13.015	5.297	0.298795	1.4205					23.748	1.93	0.630314	0.689272					0.119	9.586	0.00197082	2.60065					2.262	21.851	0.0600375	7.80378
			49.056	2.829	1.12621	0.758654					0.808	8.57	0.0185499	2.29822					17.062	5.182	0.391705	1.38966					28.636	1.987	0.76005	0.709629					0.163	24.538	0.00269952	6.65708					4.132	3.583	0.109671	1.27962
			61.424	3.164	1.41016	0.848491					0.255	33.71	0.00585422	9.04002					0.452	36.77	0.0103769	9.86062					22.124	1.861	0.58721	0.66463					0.241	22.939	0.00399132	6.22328					0.802	19.354	0.0212865	6.91201
			50.403	2.972	1.15714	0.797002					0.145	30.403	0.00332887	8.15318					0.555	49.595	0.0127415	13.2999					29.901	2.481	0.793625	0.886054					0.782	26.678	0.0129511	7.23766					3.201	7.943	0.0849602	2.83673
			46.477	3.111	1.06701	0.834278					1.958	26.533	0.0449513	7.11536					0.769	26.472	0.0176545	7.099					28.714	2.09	0.76212	0.746414					0.287	25.566	0.00475315	6.93597					2.158	23.284	0.0572771	8.31555
			55.051	3.335	1.26385	0.894348					0.124	19.014	0.00284676	5.09899					0.376	45.38	0.00863211	12.1696					45.632	2.462	1.21115	0.879269					0.205	19.087	0.00339511	5.17824					3.875	23.429	0.102849	8.36734
			26.674	2.872	0.612375	0.770185					0.216	30.372	0.00495887	8.14487					0.666	45.847	0.0152899	12.2948					33.165	2.335	0.880258	0.833912					0.201	22.939	0.00332886	6.22328					0.462	14.052	0.0122623	5.01847
			55.955	3.169	1.2846	0.849832					0.689	14.889	0.0158179	3.99279					0.667	47.858	0.0153128	12.8341					31.358	2.497	0.832297	0.891768					0.192	23.264	0.00317981	6.31145					8.087	17.608	0.214643	6.28845
			33.955	2.213	0.77953	0.593461					0.704	34.028	0.0161622	9.1253					0.425	39.191	0.00975704	10.5099					26.883	1.807	0.713522	0.645345					0.276	11.021	0.00457097	2.98996					7.628	1.014	0.202461	0.362136
			41.984	2.572	0.963858	0.689734					0.121	16.077	0.00277789	4.31137					0.879	67.573	0.0201799	18.1211					28.239	1.962	0.749513	0.700701					0.386	4.662	0.00639274	1.26479					6.934	17.69	0.184041	6.31773
			48.725	3.304	1.11862	0.886035					0.287	15.843	0.00658887	4.24862					0.324	19.761	0.00743831	5.29931					29.412	1.99	0.780646	0.7107					0.291	12.506	0.0048194	3.39284					3.324	6.103	0.0882248	2.1796
			30.328	2.56	0.696262	0.686516					0.094	7.512	0.00215803	2.0145					4.879	27.205	0.112011	7.29557					41.796	2.796	1.10934	0.998552					0.053	6.64	0.00087776	1.80141					2.355	23.823	0.0625059	8.50805
			56.655	3.397	1.30067	0.910975					1.943	10.662	0.0446069	2.85923					0.611	41.689	0.0140272	11.1798					36.206	2.203	0.960971	0.78677					2.051	9.364	0.0339676	2.54042					1.094	24.816	0.0290367	8.86268
			59.407	3.339	1.36385	0.895421					9.101	14.862	0.208938	3.98555					0.718	45.092	0.0164837	12.0923					25.586	2.038	0.679098	0.727843					0.064	2.405	0.00105994	0.652469					2.818	10.432	0.0747947	3.72564
			44.789	2.683	1.02825	0.719501					0.188	25.159	0.00431605	6.7469					0.427	47.412	0.00980295	12.7145					28.662	1.931	0.76074	0.689629					26.437	14.009	0.437836	3.8006					5.482	0.234	0.145502	0.0835698
			58.449	3.183	1.34186	0.853586					0.719	22.918	0.0165066	6.14593					0.466	31.037	0.0106983	8.3232					31.205	1.996	0.828236	0.712843					0.145	6.686	0.00240142	1.81389					1.978	11.053	0.0524996	3.94742
			60.312	3.841	1.38463	1.03004					0.274	23.977	0.00629042	6.42992					0.499	27.318	0.0114559	7.32588					32.062	2.074	0.850982	0.7407					0.144	22.078	0.00238486	5.98969					10.519	16.869	0.279193	6.02453
			38.501	2.332	0.883896	0.625373					0.167	21.523	0.00383394	5.77183					3.927	26.519	0.090155	7.11161					23.099	1.887	0.613088	0.673915					0.116	8.113	0.00192113	2.20103					6.779	23.384	0.179927	8.35127
			31.75	3.062	0.728908	0.821137					0.241	21.188	0.00553281	5.68199					0.473	48.218	0.010859	12.9306					24.409	1.913	0.647858	0.683201					0.192	15.542	0.00317981	4.21649					17.508	0.433	0.464693	0.15464
			40.47	2.352	0.9291	0.630737					1.935	16.757	0.0444232	4.49373					0.563	36.476	0.0129252	9.78178					35.168	2.162	0.933421	0.772128					0.212	28.285	0.00351104	7.67363					1.118	10.273	0.0296737	3.66886
			38.671	2.44	0.887799	0.654336					0.12	8.383	0.00275493	2.24807					0.374	47.383	0.00858619	12.7067					31.968	2.507	0.848487	0.89534					0.279	28.597	0.00462066	7.75827					5.605	14.674	0.148767	5.24061
			55.456	2.892	1.27314	0.775549					0.394	11.22	0.00904535	3.00887					1.315	33.328	0.0301894	8.93758					36.891	2.075	0.979152	0.741057					0.196	14.664	0.00324605	3.9783					1.002	14.833	0.0265949	5.2974
			31.924	3.341	0.732903	0.895957					0.245	27.087	0.00562465	7.26393					0.464	43.827	0.0106524	11.7531					37.919	2.481	1.00644	0.886054					0.204	20.689	0.00337855	5.61286					1.162	21.535	0.0308415	7.69092
			59.491	3.41	1.36578	0.914461					0.206	18.653	0.00472929	5.00218					0.626	41.364	0.0143715	11.0926					24.525	1.709	0.650937	0.610345					0.571	23.424	0.00945662	6.35486					0.221	18.054	0.00586573	6.44773
			57.429	3.675	1.31844	0.985526					2.196	17.377	0.0504152	4.66					0.526	46.382	0.0120758	12.4383					24.821	2.119	0.658793	0.756771					0.215	23.726	0.00356072	6.43679					8.436	7.621	0.223906	2.72173
			28.884	2.642	0.663111	0.708506					0.233	23.653	0.00534915	6.34303					0.911	32.827	0.0209145	8.80323					31.122	2.012	0.826033	0.718557					16.05	6.777	0.265812	1.83858					6.236	1.961	0.165514	0.700343
			27.003	2.717	0.619928	0.728619					0.408	15.658	0.00936676	4.19901					14.209	5.957	0.326207	1.59749					21.279	1.776	0.564782	0.634273					0.22	12.555	0.00364353	3.40613					4.488	19.919	0.119119	7.11379
			62.746	3.425	1.44051	0.918483					15.737	12.856	0.361286	3.4476					0.961	51.012	0.0220624	13.6799					33.609	2.141	0.892042	0.764628					0.184	16.615	0.00304732	4.5076					5.119	23.25	0.135867	8.30341
			50.078	3.08	1.14968	0.825965					0.183	12.189	0.00420127	3.26873					2.484	4.702	0.057027	1.26094					28.57	1.984	0.758298	0.708558					0.157	17.597	0.00260016	4.77401					4.993	4.26	0.132523	1.5214
			58.506	3.56	1.34317	0.954686					0.947	8.273	0.021741	2.21857					0.658	29.546	0.0151062	7.92336					32.621	1.785	0.865819	0.637488					0.845	18.14	0.0139945	4.92132					3.805	15.005	0.100991	5.35882
			35.69	2.505	0.819362	0.671767					0.38	21.152	0.00872394	5.67234					0.496	38.981	0.011387	10.4535					24.014	2.243	0.637374	0.801056					0.089	16.61	0.00147397	4.50624					2.372	0.394	0.0629571	0.140712
			30.726	2.543	0.705399	0.681957					0.204	10.544	0.00468338	2.82759					13.042	5.541	0.299415	1.48593					43.326	2.479	1.14995	0.88534					0.05	2.86	0.000828075	0.775909					5.794	16.716	0.153783	5.96988
			32.425	2.654	0.744405	0.711724					0.214	18.786	0.00491296	5.03785					0.769	24.07	0.0176545	6.45486					30.787	2.303	0.817141	0.822484					0.117	15.257	0.0019377	4.13918					2.517	7.77	0.0668056	2.77495
			45.471	3.048	1.04391	0.817383					0.241	22.388	0.00553281	6.0038					0.874	48.91	0.0200651	13.1162					25.444	1.817	0.675329	0.648916					0.163	16.573	0.00269952	4.4962					3.513	22.529	0.0932412	8.04591
			35.292	2.605	0.810225	0.698584					0.321	17.34	0.00736943	4.65007					0.523	42.918	0.0120069	11.5093					32.663	1.799	0.866934	0.642487					0.136	14.13	0.00225236	3.83342					3.923	0.386	0.104123	0.137854
			41.837	2.55	0.960483	0.683834					0.317	21.471	0.0072776	5.75788					27.711	6.499	0.636182	1.74284					18.733	2.125	0.497207	0.758914					1.142	18.012	0.0189132	4.8866					0.77	13.672	0.0204372	4.88276
			55.054	3.512	1.26392	0.941814					2.217	9.479	0.0508973	2.54199					0.683	37.119	0.0156801	9.95421					30.769	1.957	0.816664	0.698915					0.14	15.809	0.00231861	4.28893					0.319	11.702	0.00846682	4.1792
			44.842	3.355	1.02947	0.899711					0.165	25.573	0.00378803	6.85792					0.873	21.651	0.0200421	5.80616					30.652	1.898	0.813558	0.677844					0.197	17.933	0.00326262	4.86517					0.334	15.052	0.00886495	5.37561
			54.486	3.391	1.25088	0.909366					0.664	16.451	0.0152439	4.41167					1.1	21.257	0.0252535	5.7005					25.955	2.366	0.688892	0.844983					0.171	16.674	0.00283202	4.5236					5.857	0.855	0.155455	0.305351
			47.36	3.748	1.08728	1.0051					0.22	20.072	0.0050507	5.38271					1.158	28.168	0.0265851	7.55382					22.883	1.702	0.607355	0.607845					0.188	16.904	0.00311356	4.586					16.621	9.62	0.441151	3.43565
			29.737	2.686	0.682694	0.720305					0.24	25.562	0.00550986	6.85497					5.112	5.675	0.11736	1.52187					26.144	1.918	0.693908	0.684987					0.189	18.412	0.00313012	4.99512					0.376	13.239	0.0099797	4.72812
			44.768	3.112	1.02777	0.834546					0.131	10.865	0.00300746	2.91367					0.393	47.279	0.00902239	12.6788					25.723	2.003	0.682734	0.715343					0.168	11.132	0.00278233	3.02008					2.8	7.577	0.0743169	2.70602
			33.397	2.85	0.76672	0.764285					0.139	26.068	0.00319113	6.99066					0.867	21.807	0.0199044	5.84799					25.345	1.964	0.672701	0.701415					0.073	9.732	0.00120899	2.64026					2.184	13.462	0.0579672	4.80776
			38.901	3.329	0.893079	0.892739					0.092	0.517	0.00211211	0.138644					0.482	34.845	0.0110656	9.34439					24.834	1.933	0.659138	0.690344					0.233	20.148	0.00385883	5.46609					1.769	22.75	0.0469524	8.12484
			47.448	3.652	1.0893	0.979358					0.243	26.239	0.00557873	7.03652					3.454	5.133	0.079296	1.37652					29.733	2.002	0.789166	0.714986					0.252	8.516	0.0041735	2.31036					15.81	1.115	0.419625	0.398207
			36.125	2.669	0.829348	0.715747					0.161	16.126	0.0036962	4.32451					0.944	30.654	0.0216721	8.22049					36.558	2.466	0.970314	0.880697					0.132	12.454	0.00218612	3.37873					8.602	8.068	0.228312	2.88137
			41.382	3.625	0.950037	0.972117					0.132	18.413	0.00303042	4.93782					0.437	33.516	0.0100325	8.988					30.102	1.954	0.79896	0.697844					0.336	12.445	0.00556466	3.37629					4.638	7.53	0.123101	2.68923
			66.494	3.962	1.52655	1.06249					0.202	26.249	0.00463746	7.0392					0.471	53.064	0.0108131	14.2302					21.866	1.696	0.580362	0.605702					0.195	16.011	0.00322949	4.34373					2.695	12.883	0.0715301	4.60098
			51.436	3.679	1.18085	0.986599					0.171	26.475	0.00392577	7.09981					0.388	47.354	0.0089076	12.6989					27.31	1.682	0.724856	0.600703					0.291	14.072	0.0048194	3.81769					22.726	1.269	0.603188	0.453205
			48.041	3.541	1.10291	0.949591					0.202	30.371	0.00463746	8.1446					25.255	6.606	0.579798	1.77153					31.49	1.805	0.8358	0.64463					0.148	19.386	0.0024511	5.25936					1.158	17.961	0.0307354	6.41452
			57.251	3.738	1.31435	1.00242					0.282	18.545	0.00647408	4.97322					0.579	35.098	0.0132925	9.41224					27.25	1.849	0.723263	0.660344					0.185	22.334	0.00306388	6.05914					0.154	2.409	0.00408743	0.86034
			53.552	3.77	1.22943	1.011					0.216	26.002	0.00495887	6.97296					0.288	26.447	0.00661183	7.0923					32.358	2.017	0.858839	0.720343					0.129	23.559	0.00213643	6.39148					1.477	13.352	0.0392022	4.76848
			36.811	3.189	0.845097	0.855195					0.187	32.595	0.0042931	8.74101					4.248	5.617	0.0975245	1.50631					21.549	1.698	0.571949	0.606417					5.022	14.805	0.0831719	4.01655					0.47	41.344	0.0124746	14.7654
			44.349	3.367	1.01815	0.902929					0.193	30.682	0.00443084	8.228					0.72	49.073	0.0165296	13.1599					39.04	2.495	1.03619	0.891054					0.057	1.141	0.000944006	0.30955					19.968	2.291	0.529986	0.818198
			39.18	3.434	0.899484	0.920897					0.267	21.828	0.00612972	5.85362					0.327	40.46	0.00750718	10.8502					28.199	1.781	0.748451	0.636059					0.143	19.055	0.00236829	5.16956					0.324	3.529	0.00859953	1.26033
			31.302	3.324	0.718623	0.891398					0.173	28.722	0.00397169	7.70239					0.387	5.459	0.00888464	1.46394					24.168	1.621	0.641461	0.578917					0.095	2.633	0.00157334	0.714324					2.61	26.891	0.069274	9.60374
			56.642	3.64	1.30037	0.97614					0.154	17.461	0.00353549	4.68252					1.261	30.885	0.0289497	8.28244					26.697	1.788	0.708586	0.638559					0.177	11.652	0.00293139	3.16115					1.686	20.261	0.0447494	7.23593
			56.607	3.558	1.29957	0.95415					0.425	26.396	0.00975704	7.07862					0.337	23.568	0.00773676	6.32024					23.028	1.954	0.611204	0.697844					0.189	18.944	0.00313012	5.13945					1.439	34.445	0.0381936	12.3015
			46.032	3.34	1.05679	0.895689					0.221	28.735	0.00507366	7.70587					0.487	30.743	0.0111804	8.24436					19.803	1.662	0.525607	0.59356					0.104	1.32	0.0017224	0.358112					0.256	28.933	0.00679469	10.333
			50.535	3.207	1.16017	0.860022					0.181	27.064	0.00415535	7.25776					0.433	39.118	0.0099407	10.4903					33.211	1.67	0.881479	0.596417					0.22	13.691	0.00364353	3.71432					2.291	28.189	0.0608072	10.0673
			1.099	1.881	0.0252306	0.504428					9.314	13	0.213828	3.48621					0.423	41.291	0.00971112	11.073					30.282	1.857	0.803738	0.663201					0.127	20.062	0.00210331	5.44276					8.878	27.207	0.235638	9.7166
			56.716	4.275	1.30207	1.14643					2.127	10.959	0.0488311	2.93888					0.599	41.431	0.0137517	11.1106					22.086	1.763	0.586201	0.629631					0.164	1.739	0.00271609	0.471785					1.356	16.492	0.0359906	5.88988
			43.516	3.184	0.999029	0.853854					0.807	23.552	0.0185269	6.31595					0.404	38.324	0.00927493	10.2774					22.111	1.755	0.586865	0.626773					0.583	7.158	0.00965536	1.94194					1.583	35.162	0.0420156	12.5576
			42.154	3.643	0.967761	0.976944					0.27	24.169	0.00619859	6.48141					1.242	28.493	0.0285135	7.64098					24.312	1.804	0.645283	0.644273					0.199	23.901	0.00329574	6.48426					0.479	17.923	0.0127135	6.40095
			38.308	3.456	0.879465	0.926797					0.166	25.668	0.00381098	6.8834					0.769	37.805	0.0176545	10.1382					24.815	1.956	0.658634	0.698558					17.315	8.047	0.286762	2.18313					0.912	16.284	0.0242061	5.8156
			47.7	4.09	1.09508	1.09682					0.245	21.138	0.00562465	5.66858					1.281	21.896	0.0294089	5.87186					27.457	2.053	0.728757	0.7332					0.167	4.103	0.00276577	1.11313					2.752	27.962	0.0730429	9.98623
			46.012	3.215	1.05633	0.862168					0.269	21.903	0.00617563	5.87373					0.453	61.694	0.0103999	16.5445					28.391	1.82	0.753547	0.649987					0.187	26.322	0.003097	7.14107					0.39	31.885	0.0103513	11.3873
			34.019	3.826	0.780999	1.02602					0.263	25.896	0.00603789	6.94454					0.524	32.877	0.0120299	8.81664					33.139	1.955	0.879568	0.698201					0.135	12.823	0.0022358	3.47884					1.704	22.24	0.0452272	7.9427
			58.988	3.616	1.35423	0.969704					0.406	11.236	0.00932084	3.01316					0.562	42.516	0.0129022	11.4015					24.74	1.821	0.656643	0.650344					0.184	21.811	0.00304732	5.91725					14.542	2.057	0.38597	0.734629
			49.288	3.812	1.13154	1.02227					0.1	8.222	0.00229577	2.2049					0.43	48.242	0.00987183	12.9371					22.853	1.613	0.606559	0.57606					0.21	22.184	0.00347792	6.01845					1.203	26.228	0.0319297	9.36696
			42.609	2.895	0.978206	0.776353					0.213	18.921	0.00489	5.07405					0.452	22.715	0.0103769	6.09149					17.883	1.55	0.474646	0.553561					0.221	18.973	0.00366009	5.14731					2.761	14.707	0.0732818	5.2524
			29.715	3.76	0.682189	1.00832					0.277	24.508	0.00635929	6.57232					1.108	20.102	0.0254372	5.39076					25.443	1.733	0.675302	0.618916					3.405	8.785	0.0563919	2.38334					0.161	2.713	0.00427322	0.96891
			42.13	4.246	0.96721	1.13865					1.431	4.079	0.0328525	1.09387					0.384	28.059	0.00881577	7.52459					17.333	1.557	0.460048	0.556061					2.263	15.77	0.0374787	4.27835					3.71	26.445	0.09847	9.44446
			43.094	3.315	0.989341	0.888985					0.368	18.801	0.00844845	5.04187					0.396	36.288	0.00909126	9.73136					20.808	1.609	0.552281	0.574632					0.24	18.185	0.00397476	4.93353					16.549	1.7	0.43924	0.607131
			51.597	2.935	1.18455	0.78708					0.193	12.878	0.00443084	3.4535					1.247	30.492	0.0286283	8.17705					27.824	1.744	0.738498	0.622845					1.561	7.268	0.0258525	1.97179					2.213	18.941	0.0587369	6.76451
			41.244	4.498	0.946869	1.20623					0.82	3.963	0.0188253	1.06276					0.302	34.052	0.00693324	9.13174					31.872	1.606	0.845939	0.57356					0.186	22.467	0.00308044	6.09523					0.736	31.356	0.0195347	11.1984
			58.667	3.365	1.34686	0.902393					0.859	8.663	0.0197207	2.32316					0.359	30.247	0.00824183	8.11135					32.554	1.932	0.864041	0.689987					0.126	16.129	0.00208675	4.37575					0.771	24.566	0.0204637	8.7734
			47.356	3.208	1.08719	0.86029					0.323	21.125	0.00741535	5.6651					0.622	32.661	0.0142797	8.75871					24.685	1.825	0.655184	0.651773					0.136	12.258	0.00225236	3.32556					1.391	26.256	0.0369196	9.37696
			27.729	4.055	0.636595	1.08743					0.234	10.428	0.00537211	2.79648					0.478	58.698	0.0109738	15.7411					30.188	1.543	0.801243	0.551061					22.642	0.524	0.374986	0.14216					18.715	2.012	0.496729	0.718557
			48.224	3.161	1.10711	0.847686					0.227	19.108	0.00521141	5.1242					0.369	38.68	0.00847141	10.3728					31.005	1.782	0.822927	0.636416					46.902	0.697	0.776768	0.189094					30.291	1.556	0.803977	0.555703
			46.921	4.119	1.0772	1.10459					0.265	22.074	0.0060838	5.91959					0.426	43.822	0.00978	11.7518					24.352	1.729	0.646345	0.617488					0.122	20.008	0.0020205	5.42811					13.793	1.907	0.366091	0.681058
			50.139	4.288	1.15108	1.14991					0.323	18.342	0.00741535	4.91878					0.363	38.915	0.00833366	10.4358					31.284	1.722	0.830333	0.614988					26.111	0.653	0.432437	0.177157					2.792	25.019	0.0741046	8.93518
			36.947	3.208	0.84822	0.86029					0.275	23.248	0.00631338	6.23442					2.429	43.641	0.0557643	11.7032					25.817	1.424	0.685229	0.508561					26.599	0.446	0.440519	0.120998					10.332	1.555	0.27423	0.555346
			58.243	4.327	1.33713	1.16037					2.248	9.473	0.051609	2.54038					0.45	35.294	0.010331	9.4648					25.926	1.585	0.688122	0.56606					0.174	22.045	0.0028817	5.98074					0.448	22.018	0.0118907	7.86342
			26.629	3.69	0.611342	0.989548					0.133	25.825	0.00305338	6.9255					0.157	9.548	0.00360436	2.56049					31.324	1.89	0.831394	0.674987					33.55	0.706	0.555638	0.191536					3.564	26.459	0.0945949	9.44946
			54.938	4.237	1.26125	1.13624					0.711	18.174	0.016323	4.87373					0.375	23.413	0.00860915	6.27867					22.06	1.684	0.585511	0.601417					0.073	5.7	0.00120899	1.54639					3.802	33.401	0.100912	11.9287
			39.085	3.18	0.897303	0.852782					0.234	20.77	0.00537211	5.5699					0.399	49.03	0.00916014	13.1484					25.244	1.61	0.67002	0.574989					14.135	0.498	0.234097	0.135106					6.546	1.503	0.173742	0.536775
			41.44	5.096	0.951369	1.3666					0.216	26.115	0.00495887	7.00327					0.271	3.234	0.00622155	0.867263					31.503	1.858	0.836145	0.663558					26.306	3.265	0.435667	0.885784					1.94	21.423	0.051491	7.65092
			39.656	3.252	0.910412	0.87209					0.115	0.592	0.00264014	0.158757					0.828	22.969	0.019009	6.1596					29.308	1.712	0.777886	0.611417					42.177	0.611	0.698514	0.165762					1.197	18.045	0.0317705	6.44452
			44.481	4.338	1.02118	1.16332					0.115	25.087	0.00264014	6.72759					0.293	13.048	0.00672662	3.49909					29.349	1.589	0.778974	0.567489					31.172	0.851	0.516255	0.230874					7.538	18.619	0.200072	6.64951
			49.819	3.2	1.14373	0.858145					0.229	26.182	0.00525732	7.02123					0.704	23.342	0.0161622	6.25963					22.604	1.763	0.59995	0.629631					48.186	0.525	0.798032	0.142431					0.75	19.775	0.0199063	7.06236
			0.257	7.291	0.00590014	1.95523					0.193	16.663	0.00443084	4.46852					0.388	38.109	0.0089076	10.2197					28.186	1.464	0.748106	0.522847					42.903	0.598	0.710538	0.162235					3.651	26.2	0.096904	9.35696
			43.996	3.58	1.01005	0.96005					0.145	18.457	0.00332887	4.94962					0.325	41.073	0.00746127	11.0146					22.566	1.666	0.598942	0.594988					0.166	18.41	0.00274921	4.99457					0.552	18.697	0.0146511	6.67737
			46.832	3.905	1.07516	1.04721					0.217	31.552	0.00498183	8.46131					1.041	29.273	0.023899	7.85015					25.218	1.664	0.66933	0.594274					41.585	0.871	0.68871	0.2363					0.384	21.021	0.010192	7.50735
			52.214	4.281	1.19872	1.14804					0.294	24.737	0.00674958	6.63373					0.452	42.484	0.0103769	11.3929					17.438	1.824	0.462835	0.651416					33.289	0.698	0.551316	0.189365					1.272	13.482	0.0337611	4.81491
			47.601	3.284	1.09281	0.880671					0.368	19.013	0.00844845	5.09872					1.319	28.718	0.0302813	7.70131					11.422	1.448	0.30316	0.517133					0.162	2.604	0.00268296	0.706457					3.563	21.137	0.0945683	7.54878
			53.134	4.284	1.21984	1.14884					0.231	26.206	0.00530324	7.02767					0.481	41.462	0.0110427	11.1189					30.034	1.448	0.797155	0.517133					0.238	1.468	0.00394164	0.398264					4.559	18.4	0.121004	6.5713
			47.552	3.496	1.09169	0.937523					0.224	31.391	0.00514253	8.41813					6.004	5.192	0.137838	1.39234					24.197	1.467	0.642231	0.523918					0.295	3.275	0.00488564	0.888497					1.676	16.968	0.044484	6.05988
			40.313	3.494	0.925495	0.936987					0.243	30.654	0.00557873	8.22049					6	5.327	0.137746	1.42854					21.735	1.395	0.576885	0.498205					0.077	14.391	0.00127524	3.90423					1.864	22.308	0.0494739	7.96699
			48.001	4.14	1.10199	1.11023					0.35	21.308	0.00803521	5.71417					0.328	51.141	0.00753014	13.7145					22.743	1.653	0.603639	0.590346					0.18	19.048	0.00298107	5.16766					1.677	16.118	0.0445105	5.75632
			41.99	4.411	0.963995	1.1829					0.258	31.89	0.0059231	8.55195					3.631	24.836	0.0833595	6.66028					25.539	1.487	0.67785	0.531061					0.238	15.774	0.00394164	4.27944					5.99	20.343	0.158985	7.26522
			58.371	4.714	1.34007	1.26415					0.174	17.914	0.00399465	4.804					1.17	28.715	0.0268606	7.70051					24.069	1.755	0.638834	0.626773					0.277	13.056	0.00458754	3.54205					1.064	25.079	0.0282404	8.95661
			43.579	3.487	1.00048	0.93511					50.847	1.235	1.16733	0.33119					0.4	41.802	0.0091831	11.2101					24.507	1.466	0.650459	0.523561					0.235	23.5	0.00389195	6.37547					2.424	18.127	0.0643372	6.4738
			35.056	4.403	0.804806	1.18075					0.21	28.429	0.00482113	7.62381					1.264	34.622	0.0290186	9.28459					18.266	1.582	0.484812	0.564989					0.225	32.829	0.00372634	8.9064					1.26	21.62	0.0334426	7.72128
			46.637	4.748	1.07068	1.27327					0.464	27.022	0.0106524	7.2465					0.54	37.419	0.0123972	10.0347					45.265	3.179	1.20141	1.13533					0.156	18.21	0.00258359	4.94031					28.119	1.15	0.746328	0.410706
			49.434	3.665	1.13489	0.982844					0.227	26.374	0.00521141	7.07272					0.638	58.289	0.014647	15.6314					32.485	2.69	0.862209	0.960696					0.289	21.094	0.00478627	5.72273					2.382	17.121	0.0632225	6.11452
			52.792	4.592	1.21198	1.23144					0.182	0.361	0.00417831	0.0968095					1.326	41.835	0.030442	11.2189					32.687	2.85	0.867571	1.01784					0.13	13.04	0.002153	3.53771					26.819	1.602	0.711824	0.572132
			50.025	4.605	1.14846	1.23492					30.11	0.82	0.691258	0.2199					0.4	18.837	0.0091831	5.05152					52.695	3.137	1.39862	1.12034					0.18	24.918	0.00298107	6.76017					0.815	22.326	0.0216315	7.97342
			37.301	3.335	0.856347	0.894348					0.236	16.659	0.00541803	4.46745					2.144	45.68	0.0492214	12.25					50.101	3.272	1.32977	1.16855					0.177	26.769	0.00293139	7.26234					0.435	18.089	0.0115457	6.46023
			56.808	4.711	1.30418	1.26335					0.834	18.242	0.0191468	4.89196					0.549	42.343	0.0126038	11.3551					47.449	3.462	1.25938	1.2364					0.207	26.367	0.00342823	7.15328					0.667	25.953	0.0177034	9.26875
			38.594	4.632	0.886031	1.24216					0.237	28.711	0.00544098	7.69944					0.559	46.793	0.0128334	12.5485					44.057	2.797	1.16935	0.998909					0.217	25.727	0.00359385	6.97965					2.286	16.448	0.0606745	5.87417
			43.275	4.071	0.993496	1.09172					0.253	18.134	0.00580831	4.863					0.423	57.982	0.00971112	15.5491					56.046	3.629	1.48756	1.29605					0.241	21.946	0.00399132	5.95388					1.014	18.508	0.0269134	6.60987
			41.25	3.89	0.947007	1.04318					0.166	22.816	0.00381098	6.11857					0.574	45.317	0.0131777	12.1527					61.365	4.078	1.62874	1.4564					0.25	25.153	0.00414038	6.82393					5.105	20.858	0.135496	7.44914
			47.181	4.78	1.08317	1.28185					0.201	28.783	0.00461451	7.71875					0.461	34.7	0.0105835	9.30551					64.806	4.061	1.72007	1.45033					0.074	6.552	0.00122555	1.77754					0.785	21.089	0.0208353	7.53164
			39.465	4.884	0.906027	1.30974					0.168	18.745	0.0038569	5.02685					0.343	38.218	0.0078745	10.2489					53.237	3.573	1.413	1.27605					0.265	22.794	0.0043888	6.18394					2.479	17.39	0.065797	6.21059
			40.104	3.924	0.920697	1.0523					0.203	31.213	0.00466042	8.3704					0.411	30.717	0.00943563	8.23739					31.127	2.595	0.826166	0.926768					0.179	23.204	0.00296451	6.29517					0.815	25.066	0.0216315	8.95197
			49.167	5.439	1.12876	1.45858					0.157	21.608	0.00360436	5.79462					0.363	30.04	0.00833366	8.05584					39.855	2.613	1.05782	0.933196					0.123	16.599	0.00203706	4.50326					0.682	1.551	0.0181015	0.553918
			31.832	3.667	0.730791	0.983381					13.794	15.336	0.316679	4.11266					0.283	39.141	0.00649704	10.4965					52.484	3.623	1.39302	1.2939					0.152	19.744	0.00251735	5.35648					2.657	25.451	0.0705215	9.08947
			42.555	4.405	0.976967	1.18129					0.169	9.939	0.00387986	2.66534					0.527	24.192	0.0120987	6.48758					47.175	3.088	1.25211	1.10284					0.273	24.042	0.00452129	6.52252					2.196	20.35	0.0582857	7.26772
			39.855	5.524	0.914981	1.48137					1.287	9.514	0.0295466	2.55137					0.643	33.797	0.0147618	9.06335					49.51	3.002	1.31408	1.07212					0.204	28.291	0.00337855	7.67526					40.419	1.519	1.07279	0.542489
			45.275	5.542	1.03941	1.4862					9.047	9.026	0.207699	2.42051					0.326	41.907	0.00748422	11.2382					47.369	3.267	1.25726	1.16676					0.136	14.164	0.00225236	3.84265					2.966	17.001	0.0787229	6.07167
			34.798	3.748	0.798883	1.0051					0.265	16.986	0.0060838	4.55514					0.418	48.864	0.00959633	13.1039					41.902	3.228	1.11215	1.15283					0.246	4.787	0.00407413	1.2987					0.911	15.402	0.0241795	5.50061
			35.475	5.109	0.814426	1.37008					0.161	20.354	0.0036962	5.45834					0.423	41.724	0.00971112	11.1891					36.419	2.735	0.966625	0.976767					0.214	32.878	0.00354416	8.9197					2.268	13.584	0.0601967	4.85133
			33.316	4.503	0.76486	1.20757					1.358	8.019	0.0311766	2.15046					0.474	41.582	0.010882	11.1511					40.521	2.821	1.0755	1.00748					0.158	20.906	0.00261672	5.67173					0.702	1.689	0.0186323	0.603203
			40.927	4.601	0.939591	1.23385					4.549	6.543	0.104435	1.75464					0.448	42.373	0.0102851	11.3632					38.337	2.829	1.01753	1.01034					0.196	25.542	0.00324605	6.92946					5.951	10.926	0.15795	3.90207
			50.015	6.232	1.14823	1.67124					1.82	18.068	0.0417831	4.8453					0.477	32.308	0.0109508	8.66405					36.397	2.673	0.966041	0.954624					32.515	7.725	0.538497	2.09577					1.847	11.834	0.0490226	4.22635
			34.665	4.284	0.79583	1.14884					0.145	20.109	0.00332887	5.39264					0.474	54.362	0.010882	14.5783					44.556	2.694	1.18259	0.962124					0.235	13.969	0.00389195	3.78974					2.836	16.417	0.0752725	5.8631
			45.989	3.572	1.0558	0.957904					0.171	10.733	0.00392577	2.87827					0.37	31.386	0.00849436	8.41679					55.442	3.241	1.47153	1.15748					0.467	21.856	0.00773422	5.92946					0.619	9.306	0.0164294	3.32351
			0.295	7.544	0.00677253	2.02308					3.098	33.354	0.0711231	8.94455					0.229	3.986	0.00525732	1.06893					37.585	2.415	0.997572	0.862483					0.103	16.739	0.00170583	4.54124					27.09	1.427	0.719016	0.509633
			0.305	3.909	0.00700211	1.04828					4.274	9.377	0.0981214	2.51463					0.547	48.176	0.0125579	12.9194					49.673	3.134	1.31841	1.11926					0.491	19.305	0.0081317	5.23738					0.358	19.607	0.00950195	7.00236
			0.298	3.348	0.00684141	0.897834					2.701	7.232	0.0620089	1.93941					0.265	6.66	0.0060838	1.78601					38.352	2.589	1.01793	0.924625					0.141	12.382	0.00233517	3.3592					0.511	16.679	0.0135628	5.95667
			0.218	4.046	0.00500479	1.08502					20.412	11.997	0.468613	3.21724					0.35	56.21	0.00803521	15.0739					49.095	2.738	1.30307	0.977838					0.209	17.492	0.00346135	4.74552					15.005	1.135	0.398259	0.405349
			0.241	3.402	0.00553281	0.912315					0.255	27.853	0.00585422	7.46935					0.792	35.482	0.0181825	9.51522					53.293	3.321	1.41449	1.18605					40.106	1.58	0.664216	0.428649					28.757	1.31	0.763262	0.467848
			44.804	4.2	1.0286	1.12632					1.579	23.169	0.0362503	6.21324					0.302	54.502	0.00693324	14.6158					28.367	2.708	0.75291	0.967124					0.153	21.943	0.00253391	5.95307					3.934	15.816	0.104415	5.64846
			33.359	4.116	0.765847	1.10379					0.169	15.062	0.00387986	4.03918					5.222	56.895	0.119885	15.2575					39.55	2.821	1.04973	1.00748					0.211	16.491	0.00349448	4.47396					0.563	23.147	0.014943	8.26662
			34.188	4.154	0.784879	1.11398					1.644	23.809	0.0377425	6.38487					0.254	53.831	0.00583127	14.4359					51.551	2.995	1.36825	1.06962					0.191	14.742	0.00316325	3.99946					4.559	9.67	0.121004	3.4535
			37.422	3.818	0.859124	1.02387					1.767	15.368	0.0405663	4.12124					0.179	2.332	0.00410944	0.625373					52.063	2.929	1.38184	1.04605					0.252	13.623	0.0041735	3.69588					0.469	16.451	0.0124481	5.87524
			40.194	3.774	0.922763	1.01207					0.245	24.084	0.00562465	6.45861					0.29	49.547	0.00665774	13.287					34.403	2.511	0.913116	0.896768					0.199	20.792	0.00329574	5.6408					1.115	20.88	0.0295941	7.457
			32.921	3.703	0.755792	0.993035					0.254	14.892	0.00583127	3.99359					0.421	51.478	0.00966521	13.8049					51.467	2.481	1.36603	0.886054					0.221	20.585	0.00366009	5.58464					0.845	19.77	0.0224278	7.06058
			36.93	3.845	0.847829	1.03111					0.16	23.038	0.00367324	6.17811					0.444	70.185	0.0101932	18.8215					32.347	2.928	0.858547	1.04569					0.192	25.108	0.00317981	6.81172					0.852	19.197	0.0226136	6.85594
			38.023	3.914	0.872922	1.04962					0.176	13.429	0.00404056	3.60126					0.318	5.822	0.00730056	1.56129					41.656	2.417	1.10562	0.863197					0.161	16.829	0.0026664	4.56565					2.007	17.666	0.0532693	6.30916
			25.66	3.913	0.589096	1.04935													19.666	32.239	0.451487	8.64554					42.467	2.863	1.12715	1.02248					0.181	13.819	0.00299763	3.74905					11.243	1.736	0.298409	0.619988
			32.507	3.893	0.746287	1.04399													17.58	30.256	0.403597	8.11376					43.368	2.566	1.15106	0.916411					0.165	21.899	0.00273265	5.94113					2.281	10.882	0.0605418	3.88635
			44.422	4.655	1.01983	1.24833													0.32	11.081	0.00734648	2.9716					52.589	2.821	1.3958	1.00748					0.155	13.166	0.00256703	3.57189					1.385	6.749	0.0367603	2.41031
			38.848	4.531	0.891862	1.21508													0.298	13.877	0.00684141	3.7214					43.254	2.978	1.14804	1.06355					22.317	12.15	0.369603	3.29626					5.231	11.911	0.13884	4.25385
			46.457	4.269	1.06655	1.14482													0.212	8.311	0.00486704	2.22876					47.514	2.892	1.26111	1.03284					0.193	32.672	0.00319637	8.86381					37.406	1.013	0.992821	0.361779
			30.465	3.847	0.699408	1.03165													0.15	3.845	0.00344366	1.03111					33.588	2.49	0.891485	0.889268					0.171	29.597	0.00283202	8.02957					1.383	15.592	0.0367073	5.56846
			26.152	3.771	0.600391	1.01127													0.212	11.563	0.00486704	3.10085					44.873	2.857	1.19101	1.02034					0.165	22.403	0.00273265	6.07786					10.606	14.725	0.281502	5.25883
			26.99	4.179	0.619629	1.12068													0.261	17.609	0.00599197	4.72221					52.32	2.887	1.38867	1.03105					0.981	21.527	0.0162468	5.84021					40.407	1.057	1.07247	0.377493
			37.077	4.247	0.851204	1.13892													0.336	18.264	0.0077138	4.89786					41.821	3.208	1.11	1.14569					0.16	28.654	0.00264984	7.77374					0.583	14.363	0.0154739	5.12954
			50.198	4.222	1.15243	1.13222													0.294	21.07	0.00674958	5.65035					26.603	2.504	0.706091	0.894268					0.584	28.193	0.00967192	7.64867					1.7	6.2	0.045121	2.21424
			27.371	3.844	0.628376	1.03085													0.26	5.888	0.00596901	1.57899					38.644	2.634	1.02568	0.940696					1.291	16.281	0.0213809	4.41698					5.008	19.633	0.132921	7.01165
			45.77	3.872	1.05078	1.03836													0.536	46.482	0.0123053	12.4651					41.592	2.454	1.10393	0.876411					0.402	30.878	0.00665772	8.3771					2.606	10.134	0.0691678	3.61922
			37.834	3.656	0.868583	0.980431													0.453	41.904	0.0103999	11.2374					42.711	2.447	1.13363	0.873912					0.241	23.194	0.00399132	6.29246					21.261	13.92	0.564305	4.97133
			33.551	4.612	0.770255	1.2368													34.919	3.798	0.801661	1.01851					37.416	2.69	0.993087	0.960696					0.217	18.413	0.00359385	4.99539					7.985	6.846	0.211936	2.44495
			34.263	3.971	0.786601	1.0649													19.172	4.583	0.440146	1.22902					44.705	2.857	1.18655	1.02034					36.844	7.496	0.610192	2.03364					3.214	1.057	0.0853052	0.377493
			44.807	4.843	1.02867	1.29875													19.325	5.124	0.443658	1.3741					47.695	2.552	1.26591	0.911411					0.888	19.368	0.0147066	5.25448					6.408	2.051	0.17008	0.732486
			33.329	3.477	0.765158	0.932428													0.423	61.881	0.00971112	16.5946					38.513	2.603	1.0222	0.929625					0.223	26.363	0.00369321	7.1522					1.813	20.589	0.0481202	7.35307
			41.997	4.609	0.964156	1.236													1.263	52.333	0.0289956	14.0342					38.433	2.51	1.02008	0.896411					28.052	8.336	0.464583	2.26153					1.702	11.689	0.0451741	4.17456
			27.752	6.822	0.637123	1.82946													0.601	35.192	0.0137976	9.43745					34.925	2.368	0.926971	0.845698					0.269	25.099	0.00445504	6.80928					1.298	17.08	0.0344512	6.09988
			43.832	5.052	1.00628	1.3548													0.564	43.117	0.0129482	11.5627					30.059	2.487	0.797819	0.888197					0.186	20.534	0.00308044	5.57081					1.025	10.067	0.0272053	3.59529
			36.007	3.498	0.826639	0.93806													0.654	52.33	0.0150144	14.0334					44.323	2.688	1.17641	0.959981					0.211	9.729	0.00349448	2.63945					0.404	14.738	0.0107229	5.26347
			35.082	3.906	0.805403	1.04747													0.433	53.838	0.0099407	14.4378					38.143	2.784	1.01238	0.994266					0.186	19.967	0.00308044	5.41698					20.318	13.668	0.539276	4.88133
			41.21	3.953	0.946088	1.06008													0.739	65.587	0.0169658	17.5885					48.201	2.868	1.27934	1.02427					0.294	14.292	0.00486908	3.87737					0.777	13.762	0.020623	4.9149
			38.561	4.395	0.885273	1.17861													6.418	35.61	0.147343	9.54954					39.054	2.386	1.03656	0.852126					0.156	21.306	0.00258359	5.78025					0.237	35.972	0.0062904	12.8469
			41.212	3.96	0.946134	1.06195													0.471	49.227	0.0108131	13.2012					31.033	2.595	0.823671	0.926768					0.496	9.935	0.0082145	2.69533					3.463	12.104	0.0919141	4.32277
			42.114	3.553	0.966842	0.952809													0.552	57.52	0.0126727	15.4252					26.386	2.619	0.700331	0.935339					0.262	24.942	0.00433911	6.76668					0.28	31.646	0.00743169	11.3019
			40.361	3.532	0.926597	0.947178													0.485	31.374	0.0111345	8.41358					34.819	2.771	0.924158	0.989624					0.202	20.252	0.00334542	5.4943					0.197	14.927	0.00522873	5.33097
			38.974	3.735	0.894755	1.00162													0.353	33.609	0.00810408	9.01294					43.766	3.002	1.16163	1.07212					0.413	10.141	0.0068399	2.75122					0.23	23.984	0.00610461	8.56555
			39.521	4.175	0.907313	1.11961													0.466	53.582	0.0106983	14.3691					32.029	2.641	0.850106	0.943196					0.206	24.761	0.00341167	6.71758					1.93	38.989	0.0512256	13.9244
			43.767	3.848	1.00479	1.03192													4.528	32.989	0.103953	8.84667					30.452	2.454	0.80825	0.876411					0.126	18.484	0.00208675	5.01465					0.247	17.466	0.00655582	6.23774
			49.298	4.172	1.13177	1.11881													0.373	47.829	0.00856324	12.8263					39.036	2.375	1.03608	0.848198					0.822	13.816	0.0136136	3.74824					3.108	2.802	0.0824918	1.00069
			38.968	4.238	0.894617	1.13651													1.229	31.198	0.0282151	8.36638					35.821	2.871	0.950753	1.02534					0.28	30.31	0.00463722	8.22301					0.172	24.239	0.00456518	8.65662
			39.313	5.146	0.902538	1.38													0.507	45.321	0.0116396	12.1537					28.083	2.62	0.745372	0.935696					0.511	15.747	0.00846293	4.27211					1.464	26.248	0.0388571	9.3741
			41.554	4.885	0.953986	1.31001													0.472	36.846	0.0108361	9.881					33.946	2.622	0.900987	0.93641					0.356	17.346	0.00589589	4.70591					3.764	24.456	0.0999032	8.73412
			41.689	3.997	0.957085	1.07188													13.264	5.645	0.304511	1.51382					43.622	2.473	1.1578	0.883197					2.373	4.229	0.0393004	1.14731					4.586	27.063	0.121721	9.66517
			17.956	3.734	0.412229	1.00135													4.865	5.409	0.111689	1.45053					51.661	2.446	1.37117	0.873554					0.195	15.914	0.00322949	4.31742					14.036	22.486	0.37254	8.03056
			38.402	4.474	0.881623	1.19979													0.419	38.019	0.00961929	10.1956					55.59	2.778	1.47546	0.992123					0.28	8.173	0.00463722	2.21731					0.484	2.489	0.0128462	0.888911
			38.132	3.78	0.875424	1.01368													0.703	53.983	0.0161393	14.4766					35.842	2.494	0.95131	0.890697					0.19	23.911	0.00314669	6.48698					3.973	25.688	0.10545	9.17411
			46.258	5.531	1.06198	1.48325													0.958	52.546	0.0219935	14.0913					43.761	2.421	1.16149	0.864626					0.126	7.789	0.00208675	2.11313					3.505	20.275	0.0930289	7.24093
			37.414	3.86	0.858941	1.03514													12.833	5.136	0.294617	1.37732					33.6	2.23	0.891803	0.796413					0.139	15.571	0.00230205	4.22436					0.154	25.642	0.00408743	9.15768
			46.187	4.225	1.06035	1.13302													0.456	36.928	0.0104687	9.90299					47.188	2.386	1.25245	0.852126					0.236	32.523	0.00390851	8.82339					4.28	25.937	0.113599	9.26303
			34.521	3.667	0.792524	0.983381													0.436	50.596	0.0100096	13.5683					31.262	2.212	0.829749	0.789985					0.196	29.032	0.00324605	7.87629					0.677	2.879	0.0179688	1.02819
			41.871	4.22	0.961263	1.13168													1.003	68.843	0.0230266	18.4616					28.144	2.317	0.746991	0.827484					0.549	8.147	0.00909226	2.21026					2.189	16.287	0.0580999	5.81667
			43.461	4.225	0.997766	1.13302													27.373	6.232	0.628422	1.67124					40.144	2.492	1.06549	0.889983					2.394	21.388	0.0396482	5.8025					4.134	26.936	0.109724	9.61981
			34.183	3.751	0.784764	1.00591													0.936	21.472	0.0214884	5.75815					43.657	2.236	1.15873	0.798556					0.18	28.811	0.00298107	7.81633					0.227	21.892	0.00602498	7.81842
			44.189	4.129	1.01448	1.10728													4.99	5.267	0.114559	1.41245					36.727	2.393	0.974799	0.854626					0.197	20.323	0.00326262	5.51356					1.275	24.659	0.0338408	8.80661
			47.251	3.955	1.08478	1.06061													1.124	30.096	0.0258045	8.07085					31.399	2.705	0.833385	0.966053					0.088	15.074	0.00145741	4.08953					0.324	4.637	0.00859953	1.65604
			38.975	3.917	0.894778	1.05042													0.402	51.669	0.00922901	13.8561					41.71	2.205	1.10706	0.787485					0.179	22.414	0.00296451	6.08085					1.977	16.042	0.0524731	5.72917
			37.108	4.117	0.851916	1.10406													0.757	19.523	0.017379	5.23549					46.932	2.983	1.24566	1.06534					2.198	12.404	0.0364022	3.36517					3.683	20.784	0.0977533	7.42271
			41.162	3.784	0.944986	1.01476													0.54	39.857	0.0123972	10.6885					39.772	2.201	1.05562	0.786056					10.522	10.459	0.17426	2.83749					0.595	19.606	0.0157924	7.00201
			41.685	3.805	0.956993	1.02039													4.85	5.106	0.111345	1.36928					35.413	2.497	0.939924	0.891768					0.163	25.298	0.00269952	6.86327					2.221	17.311	0.0589493	6.18238
			39.024	3.746	0.895903	1.00457													2.424	6.026	0.0556496	1.61599					30.848	2.578	0.81876	0.920696					0.165	14.616	0.00273265	3.96527					3.178	23.312	0.0843497	8.32555
			33.298	4.05	0.764447	1.08609													0.321	34.536	0.00736943	9.26153					39.159	2.353	1.03935	0.840341					1.013	11.886	0.0167768	3.22463					0.287	43.802	0.00761749	15.6433
			28.723	3.946	0.659415	1.0582													0.403	44.51	0.00925197	11.9363					35.901	2.099	0.952876	0.749628					0.209	18.661	0.00346135	5.06267					1.619	22.221	0.0429711	7.93592
			36.226	3.89	0.831667	1.04318													0.363	51.526	0.00833366	13.8177					42.603	2.421	1.13076	0.864626					0.161	29.73	0.0026664	8.06565					0.219	20.407	0.00581265	7.28807
			42.855	3.794	0.983854	1.01744													26.964	5.984	0.619032	1.60473					33.144	2.083	0.8797	0.743914					0.121	14.456	0.00200394	3.92187					4.009	17.114	0.106406	6.11202
			36.366	3.556	0.834881	0.953614													0.41	34.292	0.00941267	9.1961					37.566	2.678	0.997068	0.95641					0.245	29.225	0.00405757	7.92865					3.345	22.198	0.0887822	7.9277
			46.841	4.432	1.07536	1.18853													6.14	5.073	0.140961	1.36043					39.119	2.159	1.03829	0.771056					0.206	25.958	0.00341167	7.04232					7.467	20.796	0.198187	7.427
			28.573	3.64	0.655971	0.97614													6.07	5.304	0.139353	1.42238					31.076	2.216	0.824812	0.791413					0.165	22.963	0.00273265	6.22979					1.613	18.997	0.0428119	6.78451
			49.451	3.983	1.13528	1.06812													0.482	39.871	0.0110656	10.6922					40.861	2.098	1.08452	0.749271					0.242	24.278	0.00400788	6.58654					4.62	27.896	0.122623	9.96266
			33.812	4.706	0.776247	1.26201													0.311	36.638	0.00713986	9.82522					29.147	2.176	0.773613	0.777128					0.177	14.664	0.00293139	3.9783					2.812	15.411	0.0746354	5.50382
			40.025	3.646	0.918883	0.977749													1.143	27.511	0.0262407	7.37763					29.42	2.144	0.780859	0.765699					0.268	34.68	0.00443848	9.40857					14.316	17.648	0.379972	6.30273
			40.349	3.494	0.926322	0.936987													1.3	32.53	0.0298451	8.72358					35.949	2.102	0.95415	0.7507					0.197	12.961	0.00326262	3.51628					5.946	11.459	0.157817	4.09242
			33.77	3.741	0.775283	1.00323													0.563	34.324	0.0129252	9.20468					38.863	2.405	1.03149	0.858912					0.466	25.154	0.00771766	6.8242					2.149	14.25	0.0570383	5.08919
			49.338	3.909	1.13269	1.04828													0.392	30.976	0.00899943	8.30684					29.846	1.769	0.792166	0.631773					0.134	8.392	0.00221924	2.27672					2.206	15.051	0.0585511	5.37525
			47.221	4.026	1.08409	1.07965													0.552	51.702	0.0126727	13.8649					50.233	2.429	1.33327	0.867483					0.179	25.526	0.00296451	6.92512					0.17	29.904	0.0045121	10.6798
			41.883	3.279	0.961539	0.87933													1.282	40.092	0.0294318	10.7515					32.324	2.102	0.857936	0.7507					1.3	18.698	0.02153	5.07271					1.508	16.479	0.040025	5.88524
			42.214	4.708	0.969138	1.26255													0.299	18.843	0.00686436	5.05313					20.273	2.095	0.538081	0.7482					0.154	15.748	0.00255047	4.27238					0.146	19.875	0.0038751	7.09808
			33.241	3.768	0.763138	1.01047													1.978	43.068	0.0454104	11.5496					44.584	2.347	1.18334	0.838198					0.124	16.473	0.00205363	4.46907					0.544	17.351	0.0144387	6.19666
			32.065	3.549	0.73614	0.951736													0.554	40.547	0.0127186	10.8735					41.644	2.455	1.10531	0.876769					1.468	30.677	0.0243123	8.32257					10.103	19.926	0.268151	7.11629
			42.716	3.565	0.980663	0.956027													0.456	41.394	0.0104687	11.1006					35.737	2.183	0.948523	0.779628					0.21	25.023	0.00347792	6.78866					2.882	25.23	0.0764934	9.01054
			36.7	3.693	0.842549	0.990353													0.397	52.715	0.00911422	14.1366					41.237	2.451	1.0945	0.87534					0.156	15.892	0.00258359	4.31145					0.42	19.441	0.0111475	6.94308
			44.877	4.07	1.03027	1.09145													0.6	41.841	0.0137746	11.2205					27.536	1.965	0.730854	0.701772					0.151	12.868	0.00250079	3.49105					1.825	8.497	0.0484387	3.03458
			40.209	3.631	0.923108	0.973726													0.376	49.454	0.00863211	13.2621					43.669	2.163	1.15905	0.772485					0.152	21.836	0.00251735	5.92404					0.503	5.817	0.0133505	2.07746
			38.483	3.571	0.883483	0.957636													0.505	31.639	0.0115937	8.48464					32.736	2.21	0.868871	0.78927					0.211	31.739	0.00349448	8.61069					0.67	15.443	0.017783	5.51525
			45.933	3.718	1.05452	0.997057													0.381	31.721	0.0087469	8.50663					33.079	2.395	0.877975	0.85534					0.775	26.606	0.0128352	7.21812					0.241	20.833	0.00639657	7.44021
			45.594	4.465	1.04674	1.19738													0.312	37.442	0.00716281	10.0408					27.092	2.092	0.71907	0.747128					0.168	21.347	0.00278233	5.79137					2.177	8.765	0.0577814	3.1303
			37.801	3.648	0.867825	0.978285													0.359	28.067	0.00824183	7.52674					48.458	2.373	1.28616	0.847483					0.272	24.633	0.00450473	6.68285					0.439	4.773	0.0116518	1.70461
			34.447	3.81	0.790825	1.02173													0.346	26.861	0.00794338	7.20332					17.804	1.845	0.47255	0.658916					0.199	22.741	0.00329574	6.16956					2.274	25.504	0.060356	9.10839
			45.901	4.066	1.05378	1.09038													0.259	35.523	0.00594605	9.52621					30.005	2.038	0.796386	0.727843					0.191	23.047	0.00316325	6.25258					0.425	5.382	0.0112803	1.92211
			43.225	3.73	0.992348	1.00028													0.501	23.839	0.0115018	6.39291					31.989	2.004	0.849045	0.7157					0.338	17.031	0.00559779	4.62046					1.444	23.456	0.0383263	8.37698
			39.983	3.556	0.917919	0.953614													0.614	32.814	0.0140961	8.79974					31.236	1.901	0.829059	0.678915					0.183	17.961	0.00303075	4.87276					0.389	11.95	0.0103247	4.26777
			33.719	3.257	0.774112	0.873431													0.33	40.132	0.00757605	10.7622					32.397	2.117	0.859874	0.756057					23.298	12.922	0.38585	3.5057					2.125	10.564	0.0564013	3.77278
			33.369	3.497	0.766077	0.937792													0.331	48.661	0.00759901	13.0494					31.662	2.084	0.840365	0.744271					20.692	12.534	0.342691	3.40043					1.214	16.846	0.0322217	6.01631
			40.512	3.547	0.930064	0.9512													0.373	47.696	0.00856324	12.7907					31.827	2.137	0.844745	0.763199					0.22	32.766	0.00364353	8.88931					0.831	25.065	0.0220562	8.95161
			39.404	4.127	0.904627	1.10674													0.451	41.087	0.0103539	11.0183					26.552	2.247	0.704737	0.802484					0.137	21.861	0.00226893	5.93082					1.349	11.72	0.0358048	4.18563
			46.611	3.826	1.07008	1.02602													0.401	44.894	0.00920605	12.0392					38.97	2.294	1.03433	0.81927					0.199	27.921	0.00329574	7.57488					5.102	11.481	0.135416	4.10028
			50.35	3.804	1.15592	1.02012													0.459	43.124	0.0105376	11.5646					46.658	2.301	1.23839	0.82177					0.25	28.33	0.00414038	7.68584					2.82	16.414	0.0748478	5.86203
			45.733	3.957	1.04993	1.06115													0.423	31.268	0.00971112	8.38515					25.334	1.686	0.672409	0.602131					0.172	14.689	0.00284858	3.98508					5.574	12.755	0.147944	4.55527
			53.879	4.068	1.23694	1.09092													0.441	56.617	0.0101244	15.183					28.409	2.218	0.754025	0.792127					0.562	25.087	0.00930756	6.80602					7.338	20.159	0.194763	7.1995
			48.63	5.07	1.11643	1.35962													0.351	31.326	0.00805817	8.4007					31.544	2.322	0.837234	0.82927					1.079	15.55	0.0178699	4.21867					2.476	14.382	0.0657174	5.13633
			34.694	3.677	0.796496	0.986062													0.314	46.955	0.00720873	12.5919					20.601	1.76	0.546787	0.628559					0.25	22.74	0.00414038	6.16929					0.624	11.69	0.0165621	4.17492
			36.006	3.173	0.826616	0.850904													0.198	3.66	0.00454563	0.981503					29.621	1.707	0.786194	0.609631					0.24	15.59	0.00397476	4.22952					4.016	12.01	0.106592	4.2892
			57.899	3.601	1.32923	0.965681													0.373	40.23	0.00856324	10.7885					29.578	1.698	0.785052	0.606417					0.159	11.372	0.00263328	3.08519					1.619	8.921	0.0429711	3.18601
			40.548	3.745	0.93089	1.0043													0.586	61.402	0.0134532	16.4662					29.253	1.931	0.776426	0.689629					38.69	7.307	0.640764	1.98237					0.826	11.343	0.0219235	4.05099
			39.4	3.583	0.904535	0.960854													11.557	4.366	0.265323	1.17083					28.378	1.991	0.753202	0.711058					0.201	25.955	0.00332886	7.04151					1.415	17.026	0.0375566	6.0806
			43.921	3.272	1.00833	0.877453													14.295	3.81	0.328181	1.02173					32.351	1.847	0.858653	0.65963					0.175	26.497	0.00289826	7.18855					0.39	12.23	0.0103513	4.36777
			41.941	3.41	0.962871	0.914461													1.736	59.151	0.0398546	15.8625					21.038	1.912	0.558386	0.682844					0.171	23.403	0.00283202	6.34916					2.241	12.394	0.0594801	4.42634
			42.138	3.602	0.967393	0.965949													1.274	54.397	0.0292482	14.5877					35.474	1.981	0.941543	0.707486					28.298	8.13	0.468657	2.20564					3.089	9.313	0.0819875	3.32601
			37.131	3.575	0.852444	0.958709													0.457	50.214	0.0104917	13.4659					21.782	1.699	0.578133	0.606774					0.231	27.762	0.00382571	7.53174					5.167	9.313	0.137141	3.32601
			46.355	3.541	1.06421	0.949591													12.518	2.961	0.287385	0.794052					31.921	1.862	0.84724	0.664987					0.211	22.767	0.00349448	6.17661					1.01	16.903	0.0268072	6.03667
			23.78	3.615	0.545935	0.969436													0.68	33.336	0.0156113	8.93973					24.736	2.284	0.656537	0.815698					0.149	19.202	0.00246766	5.20944					7.929	10.953	0.21045	3.91171
			45.169	3.655	1.03698	0.980162													0.448	66.055	0.0102851	17.714					34.008	2.378	0.902632	0.849269					0.179	14.572	0.00296451	3.95334					4.021	12.607	0.106724	4.50241
			44.416	4.069	1.01969	1.09118													0.497	57.229	0.01141	15.3471					26.471	1.568	0.702587	0.559989					0.527	9.991	0.00872791	2.71053					2.104	9.215	0.0558439	3.29101
			52.391	3.636	1.20278	0.975067													0.335	19.886	0.00769084	5.33283					23.865	2.418	0.633419	0.863555					0.165	20.612	0.00273265	5.59197					0.35	12.872	0.00928962	4.59705
			42.928	3.453	0.98553	0.925992													37.515	4.378	0.86126	1.17405					21.514	2.459	0.57102	0.878197					0.25	24.849	0.00414038	6.74145					11.528	14.208	0.305973	5.07419
			28.052	3.848	0.64401	1.03192													3.051	35.022	0.0700441	9.39186					25.415	2.215	0.674559	0.791056					0.184	17.576	0.00304732	4.76831					11.815	13.688	0.313591	4.88848
			35.755	4.559	0.820854	1.22259													2.476	10.252	0.0568434	2.74928					29.566	1.682	0.784734	0.600703					0.423	8.796	0.00700551	2.38633					0.495	5.435	0.0131382	1.94103
			40.493	3.753	0.929628	1.00644													0.412	57.735	0.00945859	15.4828					29.911	1.757	0.793891	0.627488					0.27	19.384	0.00447161	5.25882					12.217	18.617	0.324261	6.6488
			43.343	4.016	0.995057	1.07697													1.747	60.095	0.0401072	16.1157					25.914	1.968	0.687803	0.702843					0.3	15.305	0.00496845	4.1522					1.341	10.29	0.0355925	3.67493
			53.37	3.61	1.22525	0.968095													0.377	65.97	0.00865507	17.6912					28.705	1.81	0.761881	0.646416													8.636	13.112	0.229215	4.68277
			51.221	3.913	1.17592	1.04935													15.998	3.976	0.367278	1.06625					28.764	1.745	0.763447	0.623202													4.111	9.279	0.109113	3.31386
			49.313	3.612	1.13211	0.968631													0.438	52.532	0.0100555	14.0875					32.631	2.205	0.866084	0.787485													9.915	11.618	0.263162	4.1492
			51.203	3.599	1.17551	0.965145													0.346	48.126	0.00794338	12.906					21.264	2.522	0.564384	0.900697													0.726	10.545	0.0192693	3.766
			41.853	3.82	0.96085	1.02441													0.439	56.645	0.0100784	15.1905					18.423	1.557	0.488979	0.556061													3.301	8.615	0.0876144	3.07673
			47.178	3.709	1.0831	0.994644													3.456	36.221	0.0793419	9.7134					29.155	1.879	0.773825	0.671058													4.785	9.241	0.127002	3.30029
			59.971	3.658	1.3768	0.980967													0.366	56.67	0.00840253	15.1972					27.262	2.306	0.723582	0.823555													5.774	11.023	0.153252	3.93671
			45.143	3.434	1.03638	0.920897													41.218	4.009	0.946272	1.07509					26.689	1.931	0.708373	0.689629													10.412	16.669	0.276353	5.9531
			35.135	3.688	0.80662	0.989012													2.235	42.863	0.0513105	11.4946					19.365	1.73	0.513981	0.617845													1.573	14.913	0.0417502	5.32597
			44.169	3.551	1.01402	0.952273													0.514	45.707	0.0118003	12.2573					39.925	2.344	1.05968	0.837127													10.961	7.808	0.290924	2.78852
			41.296	2.867	0.948063	0.768844													0.404	33.036	0.00927493	8.85927					30.053	2.615	0.79766	0.93391													4.094	16.615	0.108662	5.93381
			53.388	3.656	1.22567	0.980431													0.452	40.161	0.0103769	10.77					26.864	1.825	0.713018	0.651773													1.687	12.907	0.044776	4.60955
			36.981	3.455	0.849	0.926528													0.475	44.499	0.0109049	11.9333					23.61	1.386	0.626651	0.49499													0.465	10.084	0.0123419	3.60136
			46.624	3.5	1.07038	0.938596													0.493	58.169	0.0113182	15.5992					28.251	2.39	0.749831	0.853555													15.108	8.103	0.400993	2.89387
			44.111	4.01	1.01269	1.07536													31.487	4.148	0.72287	1.11237					29.791	1.88	0.790706	0.671415													3.756	9.82	0.0996909	3.50707
			45.927	4.35	1.05438	1.16654													29.896	4.321	0.686345	1.15876					30.717	1.556	0.815283	0.555703													4.211	10.239	0.111767	3.65671
			40.202	4.203	0.922947	1.12712													0.476	59.999	0.0109279	16.09					25.818	1.455	0.685255	0.519633													4.138	10.89	0.10983	3.88921
			43.696	3.506	1.00316	0.940205													0.381	33.294	0.0087469	8.92846					25.162	1.749	0.667844	0.624631													0.454	10.602	0.01205	3.78635
			41.289	3.557	0.947902	0.953882													0.64	50.053	0.014693	13.4227					29.093	1.462	0.77218	0.522133													0.565	13.768	0.0149961	4.91705
			45.452	3.7	1.04348	0.99223													16.58	4.561	0.380639	1.22312					26.394	1.25	0.700543	0.44642													0.557	9.389	0.0147838	3.35315
			50.422	3.714	1.15758	0.995985													15.744	5.046	0.361447	1.35319					18.975	1.636	0.50363	0.584274													0.685	36.588	0.0181811	13.0669
			58.305	3.745	1.33855	1.0043													0.397	56.315	0.00911422	15.102					27.61	1.601	0.732818	0.571775													14.664	1.537	0.389208	0.548918
			52.139	3.937	1.19699	1.05579													1.153	47.83	0.0264703	12.8266					22.128	1.465	0.587316	0.523204													1.666	4.39	0.0442186	1.56783
			43.408	3.57	0.99655	0.957368													0.354	56.642	0.00812704	15.1897					33.485	1.97	0.888751	0.703558													20.055	1.147	0.532295	0.409635
			33.013	3.603	0.757904	0.966218													0.527	40.656	0.0120987	10.9027					33.231	2.223	0.882009	0.793913													1.432	8.644	0.0380078	3.08708
			45.304	3.681	1.04008	0.987135													0.647	50.267	0.0148537	13.4801					24.692	2.692	0.655369	0.96141													6.196	18.136	0.164453	6.47702
			42.025	3.614	0.964799	0.969167													0.527	45.261	0.0120987	12.1377					24.045	1.54	0.638197	0.549989													21.445	0.699	0.569188	0.249638
			41.379	3.372	0.949968	0.90427													0.53	42.881	0.0121676	11.4994					20.168	1.303	0.535294	0.465348													2.358	20.722	0.0625855	7.40057
			47.002	3.877	1.07906	1.0397													0.388	51.232	0.0089076	13.7389					24.19	1.65	0.642045	0.589274													24.318	1.859	0.645443	0.663916
			46.882	3.239	1.0763	0.868604													0.445	53.205	0.0102162	14.268					22.354	1.454	0.593315	0.519276													0.523	28.449	0.0138813	10.1602
			16.669	37.333	0.382683	10.0116													0.585	56.851	0.0134303	15.2457					26.887	2.063	0.713628	0.736771													12.463	1.567	0.33079	0.559632
			53.486	3.947	1.22792	1.05847													5.689	32.879	0.130607	8.81717					29.579	2.236	0.785079	0.798556													26.996	2.034	0.716522	0.726414
			52.277	3.848	1.20016	1.03192													0.509	48.381	0.0116855	12.9743					45.859	2.313	1.21718	0.826055													19.787	1.7	0.525182	0.607131
			37.225	3.736	0.854602	1.00188													0.685	47.08	0.0157261	12.6255					51.931	2.271	1.37834	0.811056													0.757	18.502	0.0200921	6.60773
			49.553	4.384	1.13762	1.17566													0.366	46.647	0.00840253	12.5093					26.852	2.059	0.7127	0.735343													0.777	21.633	0.020623	7.72592
			42.045	3.352	0.965258	0.898907													0.291	29.247	0.0066807	7.84318					32.507	1.416	0.862793	0.505704													24.256	1.821	0.643797	0.650344
			39.069	3.72	0.896936	0.997594													4.277	31.11	0.0981902	8.34278					21.268	1.438	0.56449	0.513561													6.208	18.213	0.164771	6.50452
			47.153	3.381	1.08253	0.906684													0.364	43.107	0.00835662	11.56					23.857	1.652	0.633207	0.589988													12.344	0.692	0.327632	0.247138
			40.73	3.199	0.935069	0.857877													0.405	41.476	0.00929788	11.1226					26.464	2.402	0.702401	0.85784													15.326	1.483	0.406779	0.529633
			40.323	3.445	0.925725	0.923847													0.481	31.134	0.0110427	8.34921					20.668	1.289	0.548565	0.460348													0.361	22.918	0.00958158	8.18484
			55.41	3.564	1.27209	0.955759													0.278	41.034	0.00638225	11.0041					23.456	1.258	0.622564	0.449277													9.032	1.44	0.239725	0.514276
			45.805	3.723	1.05158	0.998398													1.051	27.722	0.0241286	7.43422					17.01	1.319	0.451475	0.471062													1.032	17.326	0.0273911	6.18774
			48.808	3.777	1.12052	1.01288													0.532	42.781	0.0122135	11.4726					25.498	1.467	0.676762	0.523918													1.456	1.59	0.0386448	0.567846
			41.84	3.203	0.960552	0.858949													0.431	40.317	0.00989479	10.8118					21.835	1.38	0.579539	0.492848													24.761	1.434	0.657201	0.512133
			48.821	3.567	1.12082	0.956563													0.536	54.877	0.0123053	14.7164					28.487	1.99	0.756095	0.7107													17.539	1.623	0.465516	0.579632
			44.022	3.309	1.01065	0.887376													13.284	5.775	0.304971	1.54868					22.328	1.251	0.592625	0.446777													15.836	12.134	0.420315	4.33349
			40.522	3.351	0.930293	0.898639													2.492	4.069	0.0572107	1.09118					18.136	1.27	0.481361	0.453563													14.727	1.639	0.390881	0.585346
			40.155	3.287	0.921868	0.881476													4.585	5.476	0.105261	1.4685					22.203	1.639	0.589307	0.585346													6.263	1.358	0.166231	0.484991
			37.173	3.333	0.853408	0.893812													0.77	29.285	0.0176775	7.85337					18.774	1.047	0.498295	0.373921													2.932	22.019	0.0778205	7.86377
			46.501	3.309	1.06756	0.887376													0.671	50.122	0.0154046	13.4412					27.667	1.37	0.734331	0.489276													1.206	1.937	0.0320094	0.691772
			38.834	3.601	0.891541	0.965681													0.858	47.468	0.0196977	12.7295					11.066	1.015	0.293711	0.362493													5.227	13.698	0.138734	4.89205
			42.688	3.436	0.98002	0.921433													13.763	5.392	0.315967	1.44597					21.461	1.392	0.569613	0.497133													0.166	8.302	0.00440593	2.96494
			42.324	3.475	0.971663	0.931892													12.541	5.296	0.287913	1.42023					19.634	1.303	0.521121	0.465348													1.067	23.967	0.0283201	8.55948
			55.847	4.074	1.28212	1.09253													0.395	32.576	0.00906831	8.73592					21.333	1.879	0.566216	0.671058													0.624	27.598	0.0165621	9.85624
			51.925	3.708	1.19208	0.994375													1.43	4.761	0.0328296	1.27676					21.827	1.356	0.579327	0.484276													3.364	22.336	0.0892865	7.97699
			37.481	3.078	0.860479	0.825428													0.851	56.533	0.019537	15.1605					34.195	6.755	0.907596	2.41245													6.462	3.266	0.171513	1.16641
			48.316	3.742	1.10923	1.00349													0.375	49.767	0.00860915	13.346					0.374	2.267	0.00992662	0.809627													0.136	19.841	0.00360968	7.08593
			40.755	3.493	0.935643	0.936719													1.005	26.782	0.0230725	7.18214					30.462	6.094	0.808515	2.17639													17.095	2.054	0.453732	0.733557
			42.005	3.029	0.96434	0.812288													0.818	18.555	0.0187794	4.9759					23.971	6.01	0.636233	2.14639													2.624	19.299	0.0696456	6.89237
			48.927	3.162	1.12325	0.847955													5.233	5.161	0.120138	1.38403					22.189	3.755	0.588935	1.34105													0.99	16.258	0.0262763	5.80632
			51.736	3.129	1.18774	0.839105													0.363	49.827	0.00833366	13.3621					27.209	5.884	0.722175	2.10139													7.178	1.68	0.190517	0.599988
			43.763	3.659	1.0047	0.981235													0.642	17.112	0.0147389	4.58893					21.974	3.345	0.583229	1.19462													22.238	1.71	0.590236	0.610702
			45.191	4.008	1.03748	1.07483													4.374	4.926	0.100417	1.32101					20.372	3.551	0.540709	1.26819													9.924	1.855	0.2634	0.662487
			49.359	3.087	1.13317	0.827842													0.339	31.958	0.00778267	8.57019					21.628	3.934	0.574045	1.40497													6.338	2.312	0.168222	0.825698
			47.205	3.57	1.08372	0.957368													0.935	32.866	0.0214655	8.81369					30.413	3.538	0.807215	1.26355													1.159	14.806	0.0307619	5.28775
			41.576	4.126	0.954491	1.10647													0.365	31.072	0.00837957	8.33259					28.944	5.421	0.768225	1.93603													20.467	1.811	0.54323	0.646773
			45.533	3.406	1.04533	0.913388													0.397	48.019	0.00911422	12.8773					11.916	9.414	0.316272	3.36208													15.456	1.746	0.41023	0.623559
			34.268	2.917	0.786716	0.782253													6.656	4.874	0.152807	1.30706					32.044	3.737	0.850504	1.33462													26.973	1.78	0.715911	0.635702
			42.34	3.203	0.972031	0.858949													0.391	44.944	0.00897648	12.0526					19.236	4.6	0.510557	1.64283													8.922	17.237	0.236806	6.15595
			50.426	3.739	1.15767	1.00269													0.362	48.138	0.0083107	12.9092					25.869	3.275	0.686609	1.16962													11.056	1.159	0.293446	0.41392
			38.276	3.058	0.87873	0.820065													0.592	43.282	0.013591	11.6069					24.028	2.856	0.637746	1.01998													6.352	0.94	0.168593	0.335708
			47.568	3.46	1.09205	0.927869													28.614	5.96	0.656913	1.5983					32.657	3.373	0.866774	1.20462													3.057	0.955	0.0811382	0.341065
			38.216	3.868	0.877353	1.03728													0.429	31.266	0.00984887	8.38461					29.494	4.502	0.782823	1.60783													7.578	16.287	0.201134	5.81667
			50.876	3.432	1.168	0.92036													0.551	47.499	0.0126497	12.7378					18.282	4.778	0.485237	1.7064													12.868	1.422	0.341539	0.507847
			43.133	3.499	0.990236	0.938328													0.345	32.009	0.00792042	8.58386					43.457	2.809	1.15343	1.00319													32.483	1.56	0.862156	0.557132
			40.231	3.856	0.923613	1.03406													0.491	53.098	0.0112722	14.2393					47.322	3.625	1.25601	1.29462													0.215	30.573	0.00570648	10.9187
			43.574	3.044	1.00036	0.81631													1.191	30.402	0.0273427	8.15291					24.589	3.346	0.652636	1.19498													0.346	14.259	0.00918345	5.0924
			41.196	3.338	0.945767	0.895152													0.518	33.687	0.0118921	9.03385					38.723	2.885	1.02778	1.03034													0.234	15.584	0.00621077	5.56561
			34.416	3.666	0.790114	0.983112													0.415	28.274	0.00952746	7.58225					20.13	3.377	0.534286	1.20605													0.631	23.771	0.0167479	8.48948
			43.437	3.284	0.997215	0.880671													0.57	51.864	0.0130859	13.9084					0.237	1.032	0.0062904	0.368564													4.585	16.55	0.121694	5.9106
			51.278	3.428	1.17723	0.919288													0.919	25.773	0.0210982	6.91155					28.013	3.409	0.743515	1.21748													0.796	24.229	0.0211272	8.65305
			31.65	3.671	0.726612	0.984453													0.709	35.427	0.016277	9.50047					24.102	3.234	0.63971	1.15498													4.046	14.196	0.107388	5.0699
			9.649	28.542	0.221519	7.65412													0.365	34.546	0.00837957	9.26421					22.209	4.205	0.589466	1.50176													3.744	20.595	0.0993724	7.35521
			36.048	3.757	0.827581	1.00752													14.486	4.122	0.332566	1.1054					25.868	2.924	0.686582	1.04427													0.691	20.465	0.0183404	7.30879
			42.305	3.208	0.971227	0.86029													1.816	38.719	0.0416913	10.3833					29.172	3.863	0.774276	1.37962													5.97	22.396	0.158454	7.99842
			49.289	3.867	1.13156	1.03701													11.447	5.571	0.262797	1.49398					43.034	3.904	1.1422	1.39426													0.581	10.717	0.0154208	3.82743
			32.506	3.097	0.746264	0.830523													4.096	3.489	0.0940349	0.935646					33.137	2.633	0.879515	0.940339													0.661	12.9	0.0175441	4.60705
			36.703	2.932	0.842618	0.786275													0.624	35.87	0.0143256	9.61927					25.193	3.398	0.668667	1.21355													13.911	1.46	0.369223	0.521418
			35.455	3.273	0.813967	0.877721													0.34	48.411	0.00780563	12.9824					26.332	3.029	0.698898	1.08176													8.259	5.889	0.219208	2.10317
			45.466	4.29	1.0438	1.15045													3.264	3.71	0.0749341	0.994912					32.638	3.004	0.86627	1.07284													2.43	10.864	0.0644965	3.87992
			44.616	3.168	1.02428	0.849564													25.796	3.738	0.592218	1.00242					30.653	2.822	0.813585	1.00784													22.158	1.312	0.588112	0.468562
			45.574	2.97	1.04628	0.796466													6.928	5.026	0.159051	1.34782					26.433	2.866	0.701579	1.02355													1.006	20.855	0.026701	7.44807
			38.205	2.903	0.8771	0.778498													0.445	30.874	0.0102162	8.27949					23.284	3.029	0.617999	1.08176													1.481	6.752	0.0393084	2.41138
			36.82	3.206	0.845304	0.859754													3.916	6.886	0.0899025	1.84662					28.317	3.039	0.751583	1.08534													18.13	1.295	0.481202	0.462491
			40.474	2.973	0.929192	0.79727													5.612	18.651	0.128839	5.00164					33.605	2.98	0.891936	1.06426													4.133	7.857	0.109697	2.80602
			46.281	3.277	1.06251	0.878794													0.486	38.907	0.0111575	10.4337					29.652	3.221	0.787016	1.15033													3.469	8.466	0.0920734	3.02351
			23.081	12.871	0.529888	3.45162													0.695	51.82	0.0159556	13.8966					47.686	3.287	1.26567	1.17391													17.202	1.529	0.456571	0.546061
			43.208	3.903	0.991958	1.04667													28.485	4.174	0.653951	1.11934					36.36	2.956	0.965059	1.05569													7.368	12.055	0.19556	4.30527
			42.77	3.308	0.981902	0.887107													1.412	29.469	0.0324163	7.90271					33.91	3.581	0.900031	1.2789													11.905	15.105	0.31598	5.39454
			10.019	26.784	0.230014	7.18267													0.323	36.586	0.00741535	9.81128					23.266	4.514	0.617521	1.61211													0.457	12.655	0.0121296	4.51955
			40.946	2.782	0.940028	0.74605													0.727	49.59	0.0166903	13.2986					37.179	2.858	0.986796	1.02069													1.446	14.408	0.0383794	5.14561
			41.823	3.274	0.960161	0.87799													1.801	23.556	0.0413469	6.31702					30.014	2.898	0.796625	1.03498													1.304	15.969	0.0346105	5.7031
			44.67	2.886	1.02552	0.773939													0.457	39.883	0.0104917	10.6954					22.514	3.387	0.597561	1.20962													2.563	10.285	0.0680265	3.67314
			28.504	16.992	0.654387	4.55675													0.409	39.463	0.00938972	10.5828					25.595	3.161	0.679337	1.12891													2.948	12.178	0.0782451	4.3492
			43.595	2.865	1.00084	0.768308													0.499	28.999	0.0114559	7.77667					35.687	2.967	0.947196	1.05962													0.746	17.267	0.0198002	6.16667
			48.229	3.212	1.10723	0.861363													0.335	34.238	0.00769084	9.18161					39.426	2.749	1.04644	0.981767													4.589	12.913	0.1218	4.6117
			10.223	27.208	0.234697	7.29638													0.531	37.901	0.0121906	10.1639					23.946	3.873	0.635569	1.38319													0.775	17.372	0.0205699	6.20416
			43.34	3.002	0.994988	0.805047													4.915	12.719	0.112837	3.41086					34.637	2.541	0.919327	0.907482													4.952	0.984	0.131435	0.351422
			39.346	2.89	0.903295	0.775012													0.313	41.707	0.00718577	11.1846					31.011	2.311	0.823087	0.825341													6.79	6.299	0.180219	2.2496
			47.257	2.699	1.08491	0.723792													6.642	11.144	0.152485	2.98849					33.237	3.048	0.882169	1.08855													1.191	13.905	0.0316112	4.96597
			40.824	3.176	0.937227	0.851709													1.372	26.239	0.031498	7.03652					28.931	2.349	0.76788	0.838912													0.187	15.175	0.00496331	5.41954
			46.031	7.573	1.05677	2.03085													0.407	30.413	0.0093438	8.15586					32.436	2.23	0.860909	0.796413													0.773	20.944	0.0205168	7.47985
			36.3	2.911	0.833366	0.780644													1.189	53.027	0.0272968	14.2203					30.998	3.025	0.822742	1.08034													0.855	18.729	0.0226932	6.6888
			36.504	3.182	0.838049	0.853318													1.503	23.258	0.0345055	6.2371					31.08	2.309	0.824918	0.824627													0.451	13.629	0.0119703	4.8674
			40.866	2.78	0.938191	0.745513													1.289	26.444	0.0295925	7.0915					44.35	3.339	1.17713	1.19248													11.122	7.803	0.295198	2.78673
			52.775	3.258	1.21159	0.873699													0.304	35.003	0.00697915	9.38677					15.942	2.686	0.423129	0.959267													3.605	11.853	0.0956831	4.23313
			8.478	33.214	0.194636	8.90701													0.466	44.276	0.0106983	11.8735					34.956	2.925	0.927794	1.04462													0.503	8.864	0.0133505	3.16565
			27.36	2.624	0.628124	0.703679													0.353	12.975	0.00810408	3.47951					39.169	2.812	1.03961	1.00427													3.059	5.937	0.0811913	2.12032
			41.714	3.165	0.957659	0.848759													1.679	22.28	0.038546	5.97483					29.935	2.575	0.794528	0.919625													1.831	18.786	0.048598	6.70915
			35.205	3.115	0.808227	0.83535													0.548	40.126	0.0125808	10.7606					31.219	3.227	0.828607	1.15248													0.379	10.824	0.0100593	3.86564
			32.361	2.944	0.742935	0.789493													0.43	29.405	0.00987183	7.88555					38.101	3.142	1.01127	1.12212													0.203	25.763	0.00538798	9.20089
			45.624	3.133	1.04742	0.840178													0.455	34.048	0.0104458	9.13066					34.405	2.562	0.91317	0.914982													3.994	7.078	0.106008	2.52781
			50.687	2.877	1.16366	0.771526													0.297	45.418	0.00681845	12.1798					33.237	2.635	0.882169	0.941053													30.369	1.578	0.806047	0.56356
			56.502	3.462	1.29716	0.928406													0.462	46.11	0.0106065	12.3653					35.797	2.611	0.950116	0.932482													0.64	24.969	0.0169867	8.91733
			42.843	3.19	0.983578	0.855463													2.912	32.906	0.0668529	8.82441					39.292	2.648	1.04288	0.945696													0.711	15.991	0.0188712	5.71096
			50.295	3.15	1.15466	0.844736													0.299	36.657	0.00686436	9.83032					16.07	2.62	0.426526	0.935696													21.799	1.203	0.578584	0.429634
			53.282	3.071	1.22323	0.823551													0.355	27.787	0.00815	7.45165					42.205	2.985	1.1202	1.06605													1.736	10.183	0.0460765	3.63671
			48.745	3.627	1.11907	0.972654													0.473	38.622	0.010859	10.3573					32.063	5.785	0.851009	2.06603													5.406	1.497	0.143485	0.534632
			44.302	3.114	1.01707	0.835082													0.312	34.38	0.00716281	9.2197					35.536	2.663	0.943188	0.951053													3.865	15.452	0.102584	5.51846
			38.953	3.845	0.894273	1.03111													0.504	31.369	0.0115707	8.41223					24.833	4.497	0.659112	1.60604													8.429	14.148	0.223721	5.05276
			50.98	3.698	1.17039	0.991694													0.269	35.228	0.00617563	9.4471					42.739	3.334	1.13437	1.19069													0.213	20.043	0.0056534	7.15807
			59.187	3.025	1.3588	0.811215													0.678	23.912	0.0155653	6.41249					40.767	2.548	1.08203	0.909982													0.207	16.716	0.00549415	5.96988
			42.749	3.363	0.98142	0.901857													0.287	30.094	0.00658887	8.07032					26.486	2.676	0.702985	0.955696													9.569	0.852	0.253978	0.30428
			43.343	2.892	0.995057	0.775549													0.541	34.127	0.0124201	9.15185					28.781	2.292	0.763899	0.818555													4.988	1.772	0.13239	0.632845
			51.347	3.447	1.17881	0.924383													0.566	46.625	0.0129941	12.5034					33.369	2.593	0.885672	0.926053													26.038	1.692	0.691095	0.604274
			45.209	3.318	1.0379	0.889789													1.049	30.143	0.0240827	8.08346					40.671	2.701	1.07948	0.964624													3.4	12.178	0.090242	4.3492
			26.148	2.605	0.600299	0.698584													0.597	32.858	0.0137058	8.81154					43.755	2.82	1.16134	1.00712													22.376	0.867	0.593899	0.309637
			37.922	3.122	0.870603	0.837228													0.41	49.368	0.00941267	13.239					38.299	2.283	1.01652	0.815341													2.675	1.424	0.0709992	0.508561
			47.331	3.589	1.08661	0.962463													0.446	33.689	0.0102392	9.03439					33.527	2.258	0.889866	0.806413													8.969	1.238	0.238053	0.442134
			31.769	2.846	0.729344	0.763213													1.754	33.319	0.0402679	8.93517					30.742	1.984	0.815947	0.708558													18.951	1.503	0.502993	0.536775
			37.038	2.559	0.850309	0.686248													0.797	36.522	0.0182973	9.79412					36.568	2.964	0.970579	1.05855													15.537	0.918	0.412379	0.327851
			43.444	2.799	0.997376	0.750609													0.67	37.049	0.0153817	9.93544					41.022	2.466	1.0888	0.880697													1.045	10.815	0.0277361	3.86242
			37.715	3.208	0.865851	0.86029													0.264	29.488	0.00606084	7.90781					30.902	2.686	0.820194	0.959267													1.726	7.344	0.0458111	2.62281
			52.914	3.815	1.21479	1.02307													0.32	34.354	0.00734648	9.21272					25.137	2.356	0.66718	0.841412													0.739	15.015	0.0196144	5.3624
			28.042	2.64	0.643781	0.70797													0.551	19.995	0.0126497	5.36207					47.33	2.618	1.25622	0.934982													6.042	0.776	0.160365	0.277137
			61.931	3.688	1.4218	0.989012													0.739	44.175	0.0169658	11.8464					37.382	2.302	0.992184	0.822127													0.362	17.341	0.00960812	6.19309
			62.911	3.411	1.44429	0.914729													0.358	32.033	0.00821887	8.5903					34.958	3.014	0.927847	1.07641													1.126	11.121	0.029886	3.97171
			47.836	3.555	1.09821	0.953345													0.372	37.306	0.00854028	10.0044					43.88	2.925	1.16465	1.04462													25.442	1.245	0.675276	0.444634
			48.4	2.986	1.11115	0.800757													0.805	28.276	0.018481	7.58278					36.531	2.212	0.969597	0.789985													6.393	8.893	0.169682	3.17601
			58.361	3.571	1.33984	0.957636													0.492	44.147	0.0112952	11.8389					33.637	2.219	0.892785	0.792485													0.808	12.429	0.0214457	4.43884
			46.103	3.449	1.05842	0.924919													1.61	25.015	0.036962	6.70828					42.141	3.255	1.1185	1.16248													1.526	16.386	0.0405027	5.85203
			35.636	2.284	0.818122	0.612501													0.488	31.528	0.0112034	8.45487					35.897	1.849	0.95277	0.660344													0.139	3.84	0.00368931	1.3714
			41.823	2.958	0.960161	0.793248													0.871	43.57	0.0199962	11.6842					42.925	2.177	1.13931	0.777485													0.744	19.111	0.0197471	6.82522
			33.756	2.568	0.774961	0.688661													0.989	35.096	0.0227052	9.4117					33.242	2.341	0.882301	0.836055													19.019	0.973	0.504798	0.347493
			52.39	3.359	1.20276	0.900784													0.801	26.542	0.0183891	7.11778					33.424	2.25	0.887132	0.803556													0.715	18.899	0.0189774	6.74951
			33.349	3.125	0.765618	0.838032													0.343	26.081	0.0078745	6.99415					32.458	2.317	0.861493	0.827484													0.214	10.494	0.00567994	3.74778
			40.237	2.94	0.923751	0.788421													1.161	25.066	0.0266539	6.72196					32.549	2.764	0.863908	0.987124													1.557	14.04	0.0413255	5.01419
			32.638	2.891	0.749295	0.77528													0.374	43.172	0.00858619	11.5774					36.587	2.929	0.971084	1.04605													0.226	0.838	0.00599844	0.29928
			38.718	3.343	0.888878	0.896493													0.887	33.498	0.0203635	8.98317					43.571	2.962	1.15645	1.05784													6.392	14.865	0.169655	5.30882
			55.256	3.529	1.26855	0.946373													1.128	30.237	0.0258963	8.10867					47.727	3.154	1.26676	1.12641													10.482	12.212	0.278211	4.36134
			63.054	3.777	1.44758	1.01288													0.362	35.462	0.0083107	9.50986					34.466	2.44	0.914789	0.871412													10.2	0.765	0.270726	0.273209
			34.712	2.871	0.796909	0.769917													1.173	21.243	0.0269294	5.69674					37.527	2.781	0.996033	0.993195													1.071	11.24	0.0284262	4.01421
			38.918	3.074	0.893469	0.824356													1.447	32.683	0.0332198	8.76461					39.936	2.022	1.05997	0.722129													3.172	4.241	0.0841905	1.51461
			45.427	2.812	1.0429	0.754095													1.149	25.926	0.0263784	6.95258					33.536	2.912	0.890105	1.03998													14.669	4.42	0.389341	1.57854
			43.129	3.343	0.990144	0.896493													0.802	33.66	0.0184121	9.02661					37.673	2.872	0.999908	1.02569													12.552	2.315	0.333152	0.82677
			38.641	3.192	0.88711	0.856													0.56	17.888	0.0128563	4.79703					37.622	2.065	0.998554	0.737486													47.276	1.189	1.25479	0.424635
			44.039	3.83	1.01104	1.02709													0.403	44.777	0.00925197	12.0079					34.991	2.051	0.928723	0.732486													11.702	4.502	0.310592	1.60783
			53.438	3.648	1.22682	0.978285													1.525	44.416	0.0350106	11.9111					33.714	1.954	0.894829	0.697844													9.025	1.976	0.239539	0.705701
			33.889	3.117	0.778015	0.835887													0.601	34.156	0.0137976	9.15962					26.128	2.592	0.693483	0.925696													9.938	2.687	0.263772	0.959624
			36.75	2.813	0.843697	0.754363													0.458	29.907	0.0105146	8.02017					40.721	2.513	1.08081	0.897482													0.418	3.1	0.0110945	1.10712
			36.645	3.345	0.841286	0.89703													0.462	23.369	0.0106065	6.26687					38.417	2.553	1.01966	0.911768													33.304	6.426	0.883947	2.29496
			42.047	3.083	0.965304	0.826769													0.991	25.831	0.0227511	6.92711					31.219	2.087	0.828607	0.745343													11.878	4.168	0.315263	1.48854
			58.004	3.352	1.33164	0.898907													0.355	36.959	0.00815	9.91131					33.791	2.498	0.896873	0.892125													2.422	5.654	0.0642842	2.01925
			40.021	2.866	0.918792	0.768576													0.478	32.415	0.0109738	8.69274					31.46	2.217	0.835004	0.79177													7.792	3.955	0.206813	1.41247
			50.498	3.361	1.15932	0.90132													0.284	39.141	0.00652	10.4965					28.458	4.221	0.755326	1.50747													20.804	0.885	0.552175	0.316065
			56.203	3.456	1.29029	0.926797													1.038	28.319	0.0238301	7.59431					31.166	2.929	0.827201	1.04605													4.452	3.817	0.118164	1.36319
			34.874	3.141	0.800628	0.842323													0.42	31.21	0.00964225	8.3696					27.67	2.236	0.734411	0.798556													30.117	1.092	0.799358	0.389992
			51.808	3.925	1.18939	1.05257																					35.644	1.753	0.946055	0.626059													1.062	7.427	0.0281874	2.65245
			48.177	3.37	1.10603	0.903734																					32.695	2.565	0.867783	0.916054													0.53	7.669	0.0140671	2.73888
			49.794	3.64	1.14316	0.97614																					37.695	2.082	1.00049	0.743557													39.743	0.729	1.05485	0.260352
			36.395	2.677	0.835547	0.717892																					22.032	2.277	0.584768	0.813198													4.077	4.88	0.108211	1.74282
			51.629	3.456	1.18529	0.926797																					43.015	2.195	1.14169	0.783913													33.864	1.41	0.89881	0.503562
			26.891	2.813	0.617357	0.754363																					28.233	1.838	0.749354	0.656416													6.977	4.889	0.185182	1.74604
			36.232	2.73	0.831805	0.732105																					46.465	2.977	1.23326	1.06319													2.53	6.554	0.0671507	2.34067
			51.983	3.868	1.19341	1.03728																					47.926	2.312	1.27204	0.825698													40.416	1.489	1.07271	0.531775
			33.417	3.056	0.767179	0.819528																					35.549	2.545	0.943533	0.908911													6.298	9.887	0.16716	3.531
			56.102	3.604	1.28798	0.966486																					37.923	2.362	1.00654	0.843555													0.261	0.144	0.0069274	0.0514276
			46.885	3.618	1.07637	0.97024																					35.205	2.507	0.934403	0.89534													0.158	0.221	0.0041936	0.078927
			39.611	3.477	0.909379	0.932428																					17.04	1.877	0.452272	0.670344													1.072	11.513	0.0284528	4.11171
			47.38	3.795	1.08774	1.01771																					34.247	2.198	0.908976	0.784985													3.378	9.838	0.0896581	3.5135
			48.226	2.86	1.10716	0.766967																					40.003	2.016	1.06175	0.719986													35.066	1.582	0.930714	0.564989
			51.199	3.712	1.17541	0.995448																					31.868	2.363	0.845833	0.843912													2.729	17.442	0.0724325	6.22916
			35.806	3.208	0.822025	0.86029																					55.888	2.553	1.48337	0.911768													2.032	10.92	0.0539329	3.89992
			31.701	3.225	0.727783	0.864849																					30.172	1.959	0.800818	0.699629													0.755	6.204	0.020039	2.21567
			33.881	3.202	0.777831	0.858681																					42.36	1.937	1.12431	0.691772													1.992	11.723	0.0528712	4.1867
			42.147	3.382	0.9676	0.906952																					49.607	2.289	1.31666	0.817484													2.431	8.194	0.064523	2.92637
			19.548	2.901	0.448778	0.777962																					51.224	2.356	1.35958	0.841412													33.26	1.735	0.882779	0.619631
			41.627	2.851	0.955662	0.764554																					41.836	2.019	1.1104	0.721057													4.203	10.382	0.111555	3.70778
			42.366	3.207	0.972628	0.860022																					42.408	1.899	1.12558	0.678201													0.22	24.128	0.00583919	8.61697
			36.594	3.452	0.840115	0.925724																					57.729	2.795	1.53223	0.998195													1.504	15.173	0.0399188	5.41882
			48.086	3.407	1.10395	0.913656																					43.978	2.063	1.16725	0.736771													2.721	8.095	0.0722201	2.89101
			43.735	2.875	1.00406	0.77099																					50.762	2.157	1.34731	0.770342													0.314	17.974	0.00833411	6.41916
			54.817	3.719	1.25847	0.997325																					38.811	1.724	1.03011	0.615702													3.533	11.957	0.0937721	4.27027
			41.611	3.739	0.955294	1.00269																					39.621	1.922	1.05161	0.686415													0.409	26.469	0.0108556	9.45303
			36.281	2.741	0.83293	0.735055																					47.408	2.677	1.25829	0.956053													4.102	10.593	0.108874	3.78314
			45.668	3.398	1.04843	0.911243																					50.308	3.167	1.33526	1.13105													2.466	12.31	0.065452	4.39634
			51.992	2.984	1.19362	0.80022																					40.527	1.952	1.07566	0.697129													2.453	11.043	0.065107	3.94385
			41.216	2.7	0.946226	0.72406																					47.031	1.922	1.24829	0.686415													26.636	1.597	0.706967	0.570346
			49.928	3.614	1.14623	0.969167																					42.653	2.025	1.13209	0.7232													30.889	1.474	0.819849	0.526418
			40.8	3.071	0.936676	0.823551																					44.087	3.141	1.17015	1.12176													1.428	12.299	0.0379016	4.39241
			27.988	3.705	0.642541	0.993571																					44.232	2.146	1.174	0.766414													4.191	10.543	0.111237	3.76528
			32.113	2.671	0.737242	0.716283																					42.646	1.914	1.1319	0.683558													0.117	5.755	0.00310539	2.05532
			45	3.806	1.0331	1.02066																					39.981	2.36	1.06117	0.842841													0.217	14.53	0.00575956	5.18918
			47.232	3.253	1.08434	0.872358																					38.454	1.928	1.02064	0.688558													4.927	14.319	0.130771	5.11383
			50.568	3.233	1.16093	0.866995																					40.216	2.109	1.0674	0.7532													20.725	1.259	0.550078	0.449634
			48.995	3.758	1.12481	1.00778																					40.404	2.026	1.07239	0.723557													1.853	13.935	0.0491819	4.97669
			30.332	3.036	0.696354	0.814165																					46.392	2.388	1.23133	0.85284													13.608	11.222	0.36118	4.00778
			46.432	3.861	1.06597	1.03541																					31.817	2.836	0.844479	1.01284													4.418	8.82	0.117262	3.14994
			46.14	2.752	1.05927	0.738005																					54.836	3.049	1.45544	1.08891													24.028	1.038	0.637746	0.370707
			38.942	3.247	0.89402	0.870749																					43.808	1.94	1.16274	0.692844													1.837	10.91	0.0487572	3.89635
			27.963	3.03	0.641967	0.812556																					42.12	2.205	1.11794	0.787485													41.694	1.19	1.10663	0.424992
			47.36	3.426	1.08728	0.918751																					43.051	2.212	1.14265	0.789985													19.44	15.212	0.515972	5.43275
			46.542	3.561	1.0685	0.954954																					41.343	2.396	1.09732	0.855698													0.514	2.462	0.0136425	0.879269
			23.884	3.19	0.548323	0.855463																					37.143	2.129	0.985841	0.760342													11.94	0.765	0.316909	0.273209
			24.673	3.166	0.566436	0.849027																					44.134	2.271	1.17139	0.811056													24.198	1.01	0.642258	0.360707
			32.906	2.431	0.755447	0.651922																					48.56	3.226	1.28887	1.15212													0.445	2.45	0.0118111	0.874983
			42.863	3.464	0.984038	0.928942																					45.379	2.133	1.20444	0.761771													0.194	12.374	0.0051491	4.4192
			47.463	3.274	1.08964	0.87799																					37.154	2.12	0.986133	0.757128													3.094	15.267	0.0821202	5.45239
			57.804	3.855	1.32705	1.0338																					40.08	2.522	1.06379	0.900697													1.862	13.043	0.0494208	4.65812
			55.292	3.666	1.26938	0.983112																					43.948	2.327	1.16646	0.831055													5.721	14.595	0.151845	5.2124
			41.248	3.599	0.946961	0.965145																					46.423	2.335	1.23215	0.833912													1.389	20.476	0.0368665	7.31271
			41.52	3.054	0.953205	0.818992																					44.612	2.885	1.18408	1.03034													0.47	13.05	0.0124746	4.66062
			47.165	3.602	1.0828	0.965949																					0.137	0.813	0.00363622	0.290351													2.723	9.189	0.0722732	3.28172
			36.076	2.894	0.828223	0.776085																					40.038	2.523	1.06268	0.901054													0.107	12.235	0.00283997	4.36956
			49.045	3.54	1.12596	0.949323																					46.023	2.784	1.22153	0.994266													0.21	13.605	0.00557377	4.85883
			42.538	3.521	0.976576	0.944228																					35.787	3.004	0.94985	1.07284													0.371	18.509	0.009847	6.61023
			40.042	3.744	0.919274	1.00403																					43.339	2.55	1.15029	0.910696													1.654	13.794	0.0439001	4.92633
			33.071	2.391	0.759235	0.641195																					43.481	2.331	1.15406	0.832484													1.089	16.74	0.028904	5.97845
			54.66	3.422	1.25487	0.917679																					34.372	2.03	0.912294	0.724986													0.288	17.126	0.00764403	6.11631
			42.949	3.185	0.986012	0.854122																					46.727	3.282	1.24022	1.17212													3.754	12.018	0.0996378	4.29206
			44.938	3.439	1.03167	0.922238																					36.976	2.386	0.981408	0.852126													0.833	15.19	0.0221093	5.42489
			46.886	3.621	1.0764	0.971045																					43.397	2.367	1.15183	0.845341													0.506	16.095	0.0134301	5.7481
			32.404	2.7	0.743923	0.72406																					28.876	3	0.76642	1.07141													0.505	11.626	0.0134036	4.15206
			51.016	3.957	1.17121	1.06115																					40.374	2.588	1.0716	0.924268													1.906	20.211	0.0505886	7.21807
			33.639	4.774	0.772275	1.28025																					49.447	3.012	1.31241	1.07569													0.255	11.73	0.00676815	4.1892
			52.82	3.681	1.21263	0.987135																					31.139	2.278	0.826484	0.813556													0.217	1.923	0.00575956	0.686772
			47.772	3.675	1.09674	0.985526																					40.401	2.475	1.07231	0.883911													0.16	6.014	0.00424668	2.14782
			45.419	3.279	1.04272	0.87933																					27.739	2.416	0.736242	0.86284													0.163	1.652	0.00432631	0.589988
			37.809	3.149	0.868009	0.844468																					46.067	2.458	1.2227	0.87784													0.199	1.701	0.00528181	0.607488
			34.839	2.894	0.799825	0.776085																					0.13	1.028	0.00345043	0.367136													0.805	11.925	0.0213661	4.25885
			53.897	3.683	1.23735	0.987671																					45.497	2.593	1.20757	0.926053													0.206	2.296	0.0054676	0.819984
			40.047	3.136	0.919389	0.840982																					39.458	3.136	1.04729	1.11998													0.215	2.533	0.00570648	0.904625
			52.016	3.606	1.19417	0.967022																					49.455	2.838	1.31262	1.01355													0.194	2.594	0.0051491	0.92641
			24.913	3.704	0.571946	0.993303																					51.806	3.33	1.37502	1.18926													0.185	2.086	0.00491023	0.744985
			37.871	3.493	0.869433	0.936719																					41.107	2.692	1.09105	0.96141													3.338	16.256	0.0885964	5.8056
			54.312	3.333	1.24688	0.893812																					39.239	2.706	1.04147	0.96641													3.284	25.449	0.0871632	9.08875
			52.461	4.034	1.20439	1.0818																					43.455	2.822	1.15337	1.00784													0.195	20.806	0.00517564	7.43057
			48.985	3.424	1.12458	0.918215																					0.237	4.621	0.0062904	1.65032													2.604	25.593	0.0691148	9.14018
			43.326	3.343	0.994667	0.896493																					35.033	2.412	0.929838	0.861412													14.425	3.343	0.382865	1.19391
			47.721	3.525	1.09557	0.9453																					32.606	2.987	0.865421	1.06676													0.508	26.877	0.0134832	9.59874
			42.443	3.941	0.974395	1.05686																					30.255	3.182	0.803021	1.13641													9.569	18.736	0.253978	6.6913
			52.679	3.437	1.20939	0.921701																					42.305	2.653	1.12285	0.947481													0.492	20.589	0.0130585	7.35307
			58.724	3.961	1.34817	1.06222																					32.47	3.951	0.861811	1.41104													0.284	26.319	0.00753786	9.39946
			45.097	3.338	1.03533	0.895152																					40.872	3.226	1.08482	1.15212													39.505	0.961	1.04853	0.343208
			44.116	3.342	1.0128	0.896225																					36.302	3.524	0.963519	1.25855													10.857	22.723	0.288164	8.1152
			49.76	3.455	1.14238	0.926528																					40.127	3.173	1.06504	1.13319													0.29	14.724	0.00769711	5.25847
			35.717	3.633	0.819982	0.974263																					39.091	3.178	1.03754	1.13498													0.37	20.337	0.00982045	7.26307
			45.349	3.823	1.04111	1.02522																					44.028	3.178	1.16858	1.13498													0.212	22.543	0.00562685	8.05091
			49.647	3.317	1.13978	0.889521																					32.175	2.992	0.853981	1.06855													0.367	27.427	0.00974083	9.79517
			50.505	3.616	1.15948	0.969704																					26.919	3.213	0.714478	1.14748													1.962	17.865	0.0520749	6.38023
			54.438	3.435	1.24977	0.921165																					34.969	3.253	0.928139	1.16176													2.428	27.794	0.0644434	9.92623
			26.037	3.64	0.597751	0.97614																					37.896	3.134	1.00583	1.11926													2.671	18.696	0.0708931	6.67701
			43.824	3.22	1.0061	0.863508																					29.023	3.272	0.770322	1.16855													6.396	10.621	0.169761	3.79314
			54.913	3.464	1.26068	0.928942																					42.435	3.54	1.1263	1.26426													0.142	14.064	0.00376893	5.02276
			41.924	3.217	0.96248	0.862704																					27.421	3.797	0.727802	1.35604													0.179	13.145	0.00475098	4.69455
			24.941	3.706	0.572589	0.993839																					38.958	3.187	1.03401	1.13819													6.675	9.792	0.177166	3.49707
			49.22	3.661	1.12998	0.981771																					33.196	3.542	0.881081	1.26498													0.216	16.422	0.00573302	5.86489
			48.665	3.19	1.11724	0.855463																					33.755	3.054	0.895917	1.09069													2.032	14.241	0.0539329	5.08597
			44.87	3.05	1.03011	0.817919																					35.35	3.162	0.938251	1.12926													0.204	10.506	0.00541452	3.75207
			45.923	3.569	1.05429	0.9571																					31.3	3.357	0.830757	1.19891													7.366	15.809	0.195507	5.64596
			22.381	3.804	0.513817	1.02012																					41.481	3.335	1.10098	1.19105													0.226	35.612	0.00599844	12.7183
			41.898	3.755	0.961883	1.00698																					37.365	3.563	0.991733	1.27248													0.062	0.691	0.00164559	0.246781
			47.27	3.091	1.08521	0.828914																					34.628	4.09	0.919088	1.46069													1.831	16.058	0.048598	5.73489
			49.854	3.225	1.14454	0.864849																					32.042	2.974	0.850451	1.06212													0.178	24.46	0.00472443	8.73554
			42.923	3.517	0.985415	0.943155																					49.271	3.498	1.30774	1.24926													4.805	11.255	0.127533	4.01956
			36.818	3.383	0.845258	0.90722																					24.542	3.451	0.651388	1.23248													0.188	30.651	0.00498985	10.9466
			48.724	4.074	1.11859	1.09253																					48.491	4.264	1.28704	1.52283													0.208	23.439	0.00552069	8.37091
			41.504	3.337	0.952838	0.894884																					46.618	3.218	1.23732	1.14926													0.368	31.083	0.00976737	11.1009
			45.255	3.517	1.03895	0.943155																					29.643	3.868	0.786778	1.3814													2.075	29.115	0.0550742	10.398
			43.97	3.274	1.00945	0.87799																					42.509	3.236	1.12826	1.15569													1.053	17.85	0.0279485	6.37488
			38.745	3.092	0.889498	0.829183																					27.179	3.099	0.721379	1.10676													0.185	24.287	0.00491023	8.67376
			23.859	3.194	0.547749	0.856536																					28.946	2.978	0.768278	1.06355													0.729	33.141	0.0193489	11.8358
			51.466	3.62	1.18154	0.970777																					26.62	3.238	0.706542	1.15641													1.635	23.831	0.0433958	8.51091
			45.187	3.359	1.03739	0.900784																					37.564	2.971	0.997015	1.06105													0.349	25.255	0.00926308	9.01947
			54.253	3.733	1.24553	1.00108																					34.215	3.431	0.908127	1.22533													0.184	26.915	0.00488369	9.61231
			55.083	3.273	1.26458	0.877721																					39.429	3.37	1.04652	1.20355													5.09	19.889	0.135098	7.10308
			49.438	3.204	1.13498	0.859218																					22.819	3.265	0.605657	1.16605													0.273	16.629	0.0072459	5.93881
			37.471	3.072	0.860249	0.823819																					28.912	3.19	0.767376	1.13926													0.32	40.953	0.00849337	14.6258
			39.027	3.695	0.895972	0.990889																					44.752	4.002	1.1878	1.42926													0.394	17.948	0.0104575	6.40987
			46.819	3.446	1.07486	0.924115																					35.271	3.472	0.936155	1.23998													1.519	13.614	0.0403169	4.86205
			40.434	3.055	0.928273	0.81926																					36.102	2.868	0.958211	1.02427													3.419	31.745	0.0907463	11.3373
			53.889	3.566	1.23717	0.956295																					41.179	3.384	1.09296	1.20855													0.315	44.322	0.00836066	15.829
			37.37	3.585	0.857931	0.961391																					38.05	4.223	1.00991	1.50818													3.618	23.415	0.0960281	8.36234
			43.346	3.569	0.995126	0.9571																					36.838	2.79	0.977746	0.996409													0.457	25.417	0.0121296	9.07732
			53.996	3.285	1.23963	0.880939																					27.514	3.401	0.73027	1.21462													0.41	16.594	0.0108821	5.92631
			54.057	3.086	1.24103	0.827574																					24.521	2.611	0.650831	0.932482													0.135	1.213	0.00358314	0.433206
			53.347	3.125	1.22473	0.838032																					44.749	3.678	1.18772	1.31355													0.285	24.202	0.0075644	8.6434
			34.495	3.168	0.791927	0.849564																					29.47	3.769	0.782186	1.34605													0.348	22.176	0.00923654	7.91985
			46.173	3.75	1.06003	1.00564																					32.328	3.003	0.858042	1.07248													0.239	34.663	0.00634348	12.3794
			40.373	3.236	0.926873	0.867799																					30.99	2.882	0.822529	1.02927													0.329	30.76	0.00873224	10.9855
			22.238	3.295	0.510534	0.883621																					45.548	3.245	1.20892	1.15891													40.955	2.285	1.08702	0.816055
			36.115	3.17	0.829119	0.8501																					37.113	3.249	0.985045	1.16033													9.432	22.473	0.250342	8.02591
			40.086	3.643	0.920284	0.976944																					39.418	3.96	1.04622	1.41426													4.376	20.03	0.116147	7.15343
			45.228	3.409	1.03833	0.914193																					37.749	3	1.00193	1.07141													5.323	8.062	0.141282	2.87923
			38.281	3.087	0.878845	0.827842																					25.213	3.689	0.669198	1.31747													29.32	2.174	0.778205	0.776413
			49	3.018	1.12493	0.809338																					40.767	3.377	1.08203	1.20605													23.88	2.131	0.633817	0.761057
			48.332	4.278	1.10959	1.14723																					29.828	3.121	0.791688	1.11462													2.178	6.278	0.057808	2.2421
			47.203	3.224	1.08367	0.864581																					52.339	3.931	1.38917	1.4039													28.789	2.483	0.764111	0.886768
			33.457	3.405	0.768097	0.91312																					38.893	2.615	1.03229	0.93391													4.14	13.654	0.109883	4.87633
			44.658	3.173	1.02525	0.850904																					40.49	4.139	1.07468	1.47819													12.861	2.396	0.341354	0.855698
			46.458	2.911	1.06657	0.780644																					30.507	2.713	0.80971	0.96891													1.53	14.381	0.0406089	5.13597
			38.014	3.342	0.872715	0.896225																					30.149	2.57	0.800208	0.917839													1.87	13.925	0.0496331	4.97312
			32.719	3.344	0.751154	0.896761																					40.758	3.23	1.08179	1.15355													36.067	2.437	0.957282	0.87034
			43.898	3.363	1.0078	0.901857																					19.662	2.964	0.521864	1.05855													3.516	15.495	0.0933209	5.53382
			55.366	3.711	1.27108	0.99518																					33.968	2.565	0.901571	0.916054													1.775	21.366	0.0471116	7.63057
			62.684	3.674	1.43908	0.985258																					43.852	3.672	1.16391	1.3114													2.131	14.687	0.0565605	5.24525
			37.437	3.658	0.859469	0.980967																					30.43	2.94	0.807666	1.04998													7.279	14.325	0.193198	5.11597
			50.418	3.614	1.15748	0.969167																					46.429	3.728	1.23231	1.3314													1.55	16.725	0.0411397	5.9731
			57.485	3.26	1.31973	0.874235																					33.803	3.484	0.897191	1.24426													36.894	2.393	0.979232	0.854626
			40.224	3.454	0.923452	0.92626																					48.176	4.332	1.27868	1.54711													0.565	15.682	0.0149961	5.6006
			49.886	3.486	1.14527	0.934842																					35.923	3.114	0.95346	1.11212													0.417	32.003	0.0110679	11.4294
			38.997	3.286	0.895283	0.881208																					34.567	2.746	0.917469	0.980695													0.98	15.701	0.0260109	5.60739
			44.36	3.13	1.01841	0.839373																					38.589	3.379	1.02422	1.20676													6.691	13.232	0.177591	4.72562
			45.468	3.524	1.04384	0.945032																					33.889	3.375	0.899474	1.20533													4.744	15.054	0.125914	5.37632
			41.579	3.457	0.95456	0.927065																					20.498	2.571	0.544053	0.918196													20.966	2.163	0.556475	0.772485
			49.627	3.1	1.13932	0.831328																					31.71	3.14	0.841639	1.12141													0.298	14.608	0.00790945	5.21704
			24.246	2.782	0.556633	0.74605																					30.274	2.617	0.803525	0.934625													0.385	34.883	0.0102186	12.458
			31.159	3.322	0.71534	0.890862																					43.374	3.859	1.15122	1.37819													0.995	6.67	0.0264091	2.3821
			47.771	3.661	1.09671	0.981771																					15.307	2.68	0.406275	0.957124													0.356	27.259	0.00944887	9.73517
			47.842	3.559	1.09834	0.954418																					45.565	3.389	1.20938	1.21033													8.84	10.592	0.234629	3.78278
			40.246	3.319	0.923957	0.890057																					27.592	2.619	0.73234	0.935339													0.281	18.639	0.00745824	6.65666
			54.33	2.989	1.24729	0.801561																					46.393	3.548	1.23135	1.26712													4.16	17.056	0.110414	6.09131
			43.279	2.92	0.993588	0.783057																					27.117	2.767	0.719733	0.988195													7.259	19.366	0.192667	6.91629
			34.643	3.199	0.795325	0.857877																					29.68	3.218	0.78776	1.14926													8.71	25.772	0.231179	9.20411
			38.665	3.406	0.887661	0.913388																					27.875	2.733	0.739852	0.976052													1.372	18.221	0.0364153	6.50737
			36.59	2.86	0.840024	0.766967																					21.123	3.3	0.560642	1.17855													1.583	21.704	0.0420156	7.75128
			25.869	4.089	0.593894	1.09655																					38.88	3.551	1.03194	1.26819													2.672	2.709	0.0709196	0.967481
			38.732	3.286	0.889199	0.881208																					27.504	2.493	0.730005	0.89034													0.631	21.305	0.0167479	7.60878
			37.577	3.187	0.862683	0.854659																					27.728	3.043	0.73595	1.08676													0.286	19.346	0.00759095	6.90915
			35.708	2.995	0.819775	0.80317																					63.489	4.101	1.68511	1.46461													0.608	24.952	0.0161374	8.91125
			32.567	3.67	0.747665	0.984185																					43.76	3.711	1.16147	1.32533													19.6	10.86	0.520219	3.8785
			43.432	3.553	0.9971	0.952809																					44.819	3.386	1.18958	1.20926													1.903	22.827	0.050509	8.15234
			31.328	3.209	0.71922	0.860559																					41.779	3.097	1.10889	1.10605													4.352	12.956	0.11551	4.62705
			47.795	2.977	1.09727	0.798343																					38.442	3.13	1.02032	1.11784													12.356	17.411	0.32795	6.21809
			39.27	3.094	0.90155	0.829719																					33.912	3.42	0.900084	1.2214													0.342	22.774	0.00907728	8.13341
			42.883	3.088	0.984497	0.82811																					40.415	3.258	1.07269	1.16355													0.327	30.785	0.00867916	10.9944
			32.685	3.735	0.750374	1.00162																					40.803	3.614	1.08298	1.29069													0.512	15.262	0.0135894	5.45061
			35.793	3.518	0.821726	0.943423																					23.635	3.075	0.627315	1.09819													0.786	25.119	0.0208618	8.9709
			39.08	2.974	0.897188	0.797538																					44.533	3.597	1.18198	1.28462													14.836	19.945	0.393774	7.12308
			46.386	3.11	1.06492	0.83401																					55.058	3.965	1.46134	1.41604													0.895	15.909	0.0237549	5.68167
			38.299	2.657	0.879258	0.712528																					30.633	2.703	0.813054	0.965338													0.579	15.392	0.0153677	5.49704
			33.983	3.54	0.780173	0.949323																					54.448	3.764	1.44515	1.34426													0.791	25.519	0.0209945	9.11375
			39.454	3.01	0.905775	0.807193																					46.103	3.452	1.22366	1.23283													0.362	21.032	0.00960812	7.51128
			33.291	2.947	0.764286	0.790298																					17.468	3.335	0.463632	1.19105													0.773	24.38	0.0205168	8.70697
			39.187	3.65	0.899645	0.978822																					40.377	3.035	1.07168	1.08391													0.594	20.075	0.0157658	7.1695
			44.217	2.857	1.01512	0.766163																					29.006	2.57	0.769871	0.917839													0.422	16.132	0.0112006	5.76132
			35.627	2.804	0.817915	0.75195																					38.455	2.896	1.02066	1.03427													0.379	23.258	0.0100593	8.30627
			51.63	2.812	1.18531	0.754095																					53.021	3.551	1.40727	1.26819													0.593	17.64	0.0157393	6.29988
			68.907	3.663	1.58195	0.982308																					50.247	2.707	1.33364	0.966767													1.651	3.606	0.0438205	1.28783
			71.446	3.474	1.64024	0.931624																					51.364	3.076	1.36329	1.09855													0.579	11.033	0.0153677	3.94028
			62.512	3.577	1.43513	0.959245																					37.863	3.256	1.00495	1.16283													8.171	15.929	0.216873	5.68882
			51.952	2.822	1.1927	0.756777																					37.437	3.011	0.993644	1.07534													2.711	16.67	0.0719547	5.95346
			68.458	3.421	1.57164	0.917411																					23.232	2.758	0.616618	0.984981													0.212	2.6	0.00562685	0.928553
			69.27	3.666	1.59028	0.983112																					45.566	3.88	1.2094	1.38569													0.322	13.278	0.00854645	4.74205
			59.801	3.592	1.3729	0.963268																					44.734	3.229	1.18732	1.15319													0.463	17.232	0.0122888	6.15417
			56.787	3.575	1.3037	0.958709																					31.188	2.396	0.827785	0.855698													0.298	4.87	0.00790945	1.73925
			51.08	3.854	1.17268	1.03353																					39.385	2.72	1.04535	0.97141													0.776	16.073	0.0205964	5.74025
			58.449	4.145	1.34186	1.11157																					35.224	2.69	0.934907	0.960696													0.17	2.442	0.0045121	0.872126
			62.292	3.16	1.43008	0.847418																					39.463	2.843	1.04742	1.01534													0.378	29.169	0.0100328	10.4173
			64.773	3.991	1.48704	1.07027																					35.138	2.975	0.932625	1.06248													0.582	17.834	0.0154473	6.36916
			65.132	3.492	1.49528	0.936451																					31.872	2.619	0.845939	0.935339													0.223	14.375	0.00591881	5.13383
			32.598	2.744	0.748376	0.735859																					43.322	2.659	1.14984	0.949624													0.287	31.243	0.00761749	11.158
			33.593	2.977	0.771219	0.798343																					44.161	2.896	1.17211	1.03427													0.543	12.581	0.0144122	4.49313
			63.964	3.918	1.46847	1.05069																					43.749	2.331	1.16118	0.832484													0.128	6.996	0.00339735	2.49852
			57.399	3.835	1.31775	1.02843																					29.691	2.814	0.788052	1.00498													0.213	4.036	0.0056534	1.4414
			63.672	4.109	1.46177	1.10191																					36.761	2.901	0.975702	1.03605													0.296	21.566	0.00785636	7.70199
			62.957	4.095	1.44535	1.09816																					52.665	3.277	1.39782	1.17033													0.261	26.755	0.0069274	9.55517
			66.694	3.812	1.53114	1.02227																					34.542	2.663	0.916806	0.951053													0.374	27.702	0.00992662	9.89338
			52.963	3.985	1.21591	1.06866																					37.571	2.471	0.997201	0.882483													0.138	14.862	0.00366276	5.30775
			60.136	4.156	1.38059	1.11452																					28.915	3.554	0.767455	1.26926													1.787	7.491	0.0474301	2.6753
			59.398	3.513	1.36364	0.942082																					44.542	3.073	1.18222	1.09748													4.876	12.971	0.129418	4.63241
			54.76	3.311	1.25717	0.887912																					46.384	2.981	1.23111	1.06462													0.487	16.978	0.0129258	6.06345
			64.76	4.008	1.48674	1.07483																					29.899	2.864	0.793572	1.02284													3.379	20.142	0.0896846	7.19343
			60.892	3.962	1.39794	1.06249																					39.429	4.1	1.04652	1.46426													0.258	20.318	0.00684778	7.25629
			79.818	3.544	1.83244	0.950396																					44.591	3.172	1.18352	1.13284													0.252	22.324	0.00668853	7.9727
			71.221	4.365	1.63507	1.17056																					34.239	2.656	0.908764	0.948553													0.254	3.812	0.00674161	1.3614
			55.215	3.789	1.26761	1.0161																					39.618	3.016	1.05153	1.07712													4.493	12.326	0.119252	4.40206
			54.013	3.847	1.24002	1.03165																					48.569	3.316	1.28911	1.18426													11.016	1.535	0.292384	0.548204
			76.408	3.638	1.75415	0.975604																					36.958	2.526	0.980931	0.902125													4.331	16.099	0.114952	5.74953
			55.536	3.693	1.27498	0.990353																					29.194	2.767	0.77486	0.988195
			40.768	3.597	0.935941	0.964609																					34.732	2.615	0.921849	0.93391
			53.252	4.109	1.22255	1.10191																					30.461	3.182	0.808489	1.13641
			57.543	4.388	1.32106	1.17673																					31.391	3.028	0.833173	1.08141
			61.305	3.33	1.40742	0.893007																					34.559	2.724	0.917257	0.972838
			61.923	4.143	1.42161	1.11103																					31.319	2.739	0.831262	0.978195
			48.518	3.478	1.11386	0.932696																					35.873	2.988	0.952133	1.06712
			59.498	4.173	1.36594	1.11907																					37.607	2.949	0.998156	1.05319
			61.693	4.102	1.41633	1.10003																					36.113	3.024	0.958503	1.07998
			54.819	4.126	1.25852	1.10647																					45.203	3.655	1.19977	1.30533
			55.733	4.033	1.2795	1.08153																					44.794	2.647	1.18891	0.945339
			59.476	3.867	1.36543	1.03701																					37.248	2.735	0.988628	0.976767
			54.258	3.266	1.24564	0.875844																					39.798	3.071	1.05631	1.09676
			63.278	3.668	1.45272	0.983649																					43.805	3.038	1.16266	1.08498
			54.602	3.436	1.25354	0.921433																					33.856	2.992	0.898598	1.06855
			44.284	3.053	1.01666	0.818724																					37.279	2.891	0.989451	1.03248
			64.122	3.719	1.4721	0.997325																					44.996	3.305	1.19427	1.18033
			52.945	4.042	1.2155	1.08394																					33.683	2.726	0.894006	0.973552
			43.885	3.214	1.0075	0.861899																					41.077	3.146	1.09026	1.12355
			60.19	4.038	1.38183	1.08287																					29.454	2.936	0.781761	1.04855
			54.732	3.393	1.25652	0.909902																					36.031	2.842	0.956326	1.01498
			61.169	3.663	1.4043	0.982308																					42.853	3.002	1.13739	1.07212
			55.754	3.372	1.27999	0.90427																					42.531	3.105	1.12885	1.10891
			55.291	3.672	1.26936	0.984721																					25.331	3.588	0.67233	1.2814
			67.965	3.491	1.56032	0.936183																					31.929	2.816	0.847452	1.00569
			46.525	3.253	1.06811	0.872358																					32.863	2.717	0.872242	0.970338
			50.471	3.465	1.1587	0.92921																					41.941	3.701	1.11319	1.32176
			57.024	3.373	1.30914	0.904538																					43.068	3.39	1.1431	1.21069
			58.304	3.95	1.33853	1.05927																					34.852	2.844	0.925034	1.01569
			50.247	3.412	1.15356	0.914997																					29.13	2.586	0.773162	0.923553
			43.268	3.819	0.993335	1.02414																					35.718	2.863	0.948019	1.02248
			56.974	4.101	1.30799	1.09977																					37.067	3.302	0.983824	1.17926
			47.322	3.338	1.08641	0.895152																					43.649	3.858	1.15852	1.37783
			57.109	4.091	1.31109	1.09708																					34.858	3.201	0.925193	1.14319
			55.486	3.416	1.27383	0.91607																					36.476	3.188	0.968138	1.13855
			59.544	4.166	1.367	1.1172																					42.092	3.3	1.1172	1.17855
			48.561	3.501	1.11485	0.938864																					39.451	2.973	1.0471	1.06176
			55.804	3.287	1.28113	0.881476																					44.25	2.493	1.17447	0.89034
			51.171	3.674	1.17477	0.985258																					34.988	3.13	0.928643	1.11784
			56.835	4.063	1.3048	1.08958																					35.552	3.506	0.943613	1.25212
			50.248	3.707	1.15358	0.994107																					35.292	2.554	0.936712	0.912125
			31.497	3.928	0.7231	1.05337																					42.591	3.169	1.13044	1.13176
			49.655	3.648	1.13997	0.978285																					40.345	3.159	1.07083	1.12819
			55.31	3.359	1.26979	0.900784																					36.136	2.927	0.959113	1.04534
			52.868	3.658	1.21373	0.980967																					23.088	3.461	0.612796	1.23605
			48.841	3.674	1.12128	0.985258																					38.479	3.135	1.0213	1.11962
			53.664	3.784	1.232	1.01476																					32.659	3.144	0.866828	1.12284
			60.96	4.28	1.3995	1.14777																					30.051	2.924	0.797607	1.04427
			48.634	3.939	1.11653	1.05632																					37.469	2.723	0.994493	0.972481
			51.516	3.606	1.18269	0.967022																					42.076	3.517	1.11677	1.25605
			28.787	3.514	0.660884	0.94235																					43.46	3.646	1.15351	1.30212
			53.682	3.447	1.23242	0.924383																					28.064	2.723	0.744868	0.972481
			56.471	3.456	1.29645	0.926797																					37.313	2.622	0.990353	0.93641
			45.29	3.94	1.03976	1.05659																					39.174	2.748	1.03975	0.981409
			71.377	4.017	1.63865	1.07724																					29.558	2.7	0.784522	0.964267
			51.62	3.469	1.18508	0.930283																					38.01	3.185	1.00885	1.13748
			53.882	3.711	1.23701	0.99518																					25.037	2.842	0.664526	1.01498
			46.917	3.968	1.07711	1.0641																					42.685	3.3	1.13294	1.17855
			61.143	3.682	1.40371	0.987403																					45.791	3.359	1.21537	1.19962
			58.708	3.866	1.3478	1.03675																					58.742	4.472	1.55912	1.59711
			53.411	3.433	1.2262	0.920629																					38.458	3.138	1.02074	1.12069
			55.285	3.532	1.26922	0.947178																					35.404	2.97	0.939685	1.06069
			48.574	3.737	1.11515	1.00215																					34.998	2.534	0.928909	0.904982
			47.496	3.704	1.0904	0.993303																					44.348	2.762	1.17707	0.986409
			51.4	3.848	1.18003	1.03192																					44.058	2.86	1.16938	1.02141
			58.388	4.137	1.34046	1.10942																					38.139	3.294	1.01228	1.17641
			41.403	3.436	0.950519	0.921433																					40.808	3.248	1.08312	1.15998
			53.286	3.866	1.22333	1.03675																					40.323	3.446	1.07024	1.23069
			45.193	3.569	1.03753	0.9571																					44.651	3.02	1.18512	1.07855
			41.974	3.695	0.963628	0.990889																					36.145	3.193	0.959352	1.14033
			51.901	3.882	1.19153	1.04104																					33.937	3.262	0.900748	1.16498
			49.281	3.545	1.13138	0.950664																					46.785	3.957	1.24176	1.41319
			50.706	3.689	1.1641	0.98928																					38.517	2.855	1.02231	1.01962
			38.84	3.634	0.891679	0.974531																					44.808	3.018	1.18928	1.07784
			50.31	3.884	1.155	1.04157																					33.175	3.141	0.880523	1.12176
			66.202	4.1	1.51985	1.0995																					40.69	3.808	1.07998	1.35997
			50.157	3.775	1.15149	1.01234																					38.756	2.722	1.02865	0.972124
			37.603	2.848	0.86328	0.763749																					34.714	2.879	0.921371	1.02819
			56.727	3.885	1.30232	1.04184																					32.003	2.94	0.849416	1.04998
			45.711	3.569	1.04942	0.9571																					43.625	3.408	1.15788	1.21712
			47.461	3.638	1.0896	0.975604																					35.479	2.86	0.941675	1.02141
			56.562	3.534	1.29854	0.947714																					32.633	2.766	0.866137	0.987838
			51.17	3.557	1.17475	0.953882																					31.803	2.962	0.844108	1.05784
			44.362	3.515	1.01845	0.942619																					52.421	4.289	1.39135	1.53176
			53.137	3.805	1.21991	1.02039																					34.033	2.786	0.903296	0.994981
			44.811	3.945	1.02876	1.05793																					39.346	3.356	1.04431	1.19855
			49.606	3.716	1.13884	0.996521																					34.691	2.879	0.92076	1.02819
			52.974	3.818	1.21616	1.02387																					31.641	2.808	0.839808	1.00284
			52.492	4.141	1.2051	1.11049																					42.401	3.553	1.1254	1.2689
			42.068	3.76	0.965786	1.00832																					52.659	4.127	1.39766	1.4739
			49.869	3.629	1.14488	0.97319																					44.017	3.075	1.16829	1.09819
			45.729	3.959	1.04983	1.06169																					45.196	2.866	1.19958	1.02355
			47.675	3.996	1.09451	1.07161																					33.031	3.137	0.876701	1.12034
			52.663	4.305	1.20902	1.15447																					26.314	2.847	0.69842	1.01677
			51.583	2.523	1.18423	0.676594																					47.125	3.256	1.25078	1.16283
			52.845	3.582	1.2132	0.960586																					35.45	2.768	0.940906	0.988552
			7.092	0.99	0.162816	0.265489																					36.764	3.336	0.975782	1.19141
			57.923	2.593	1.32978	0.695366																					25.367	2.797	0.673285	0.998909
			41.178	3.059	0.945354	0.820333																					41.723	3.15	1.1074	1.12498
			57.728	2.959	1.3253	0.793516																					17.488	2.453	0.464162	0.876054
			50.698	3.021	1.16391	0.810142																					28.36	2.871	0.752725	1.02534
			50.553	3.118	1.16058	0.836155																					49.087	3.559	1.30286	1.27105
			41.473	1.876	0.952126	0.503087																					34.991	2.942	0.928723	1.05069
			63.096	2.686	1.44854	0.720305																					28.83	2.785	0.765199	0.994623
			53.888	3.255	1.23715	0.872894																					46.464	4.012	1.23324	1.43283
			64.593	3.045	1.48291	0.816579																					44.299	2.853	1.17577	1.01891
			50.195	3.596	1.15236	0.96434																					40.186	3.562	1.06661	1.27212
			57.716	3.943	1.32503	1.0574																					44.026	2.936	1.16853	1.04855
			50.957	3.024	1.16986	0.810947																					52.232	3.365	1.38633	1.20176
			51.486	3.165	1.182	0.848759																					51.664	3.02	1.37125	1.07855
			50.756	2.885	1.16524	0.773671																					36.526	2.967	0.969465	1.05962
			53.383	2.887	1.22555	0.774208																					40.963	3.115	1.08723	1.11248
			49.914	2.522	1.14591	0.676326																					29.537	3.234	0.783964	1.15498
			40.654	2.649	0.933324	0.710383																					0.303	3.982	0.00804216	1.42212
			50.591	3.192	1.16145	0.856																					34.963	2.897	0.92798	1.03462
			55.544	2.864	1.27516	0.76804																					41.195	3.101	1.09339	1.10748
			51.903	3.551	1.19158	0.952273																					35.958	2.963	0.954389	1.05819
			46.431	3.669	1.06595	0.983917																					44.221	3.294	1.1737	1.17641
			54.706	2.971	1.25593	0.796734																					43.039	3.792	1.14233	1.35426
			48.246	3.177	1.10762	0.851977																					45.827	3.31	1.21633	1.18212
			53.57	3.656	1.22985	0.980431																					39.747	3.416	1.05496	1.21998
			48.387	3.588	1.11086	0.962195																					46.951	3.019	1.24616	1.07819
			26.575	2.59	0.610102	0.694561																					45.926	3.507	1.21896	1.25248
			50.603	3.039	1.16173	0.81497																					41.627	3.06	1.10485	1.09284
			48.352	3.11	1.11005	0.83401																					47.988	3.345	1.27369	1.19462
			55.719	3.827	1.27918	1.02629																					52.059	3.211	1.38174	1.14676
			57.457	2.978	1.31908	0.798611																					45.258	2.829	1.20123	1.01034
			37.522	3.177	0.86142	0.851977																					41.895	3.313	1.11197	1.18319
			47.925	2.603	1.10025	0.698047																					47.546	3.61	1.26195	1.28926
			50.916	3.217	1.16892	0.862704																					45.736	3.229	1.21391	1.15319
			50.901	3.691	1.16857	0.989817																					41.133	3.149	1.09174	1.12462
			38.903	2.857	0.893125	0.766163																					48.579	3.08	1.28937	1.09998
			47.841	3.359	1.09832	0.900784																					58.894	4.021	1.56315	1.43604
			48.873	3.091	1.12201	0.828914																					47.949	3.196	1.27265	1.14141
			50.723	3.667	1.16449	0.983381																					38.117	3.439	1.01169	1.22819
			60.97	3.359	1.39973	0.900784																					47.819	3.257	1.2692	1.16319
			50.063	2.561	1.14933	0.686784																					44.65	3.025	1.18509	1.08034
			54.45	3.404	1.25005	0.912852																					57.457	3.28	1.52501	1.17141
			54.269	3.586	1.24589	0.961659																					44.208	3.591	1.17336	1.28247
			58.597	2.95	1.34525	0.791102																					38.842	3.281	1.03094	1.17176
			42.825	3.072	0.983165	0.823819																					49.47	3.658	1.31302	1.3064
			48.362	3.729	1.11028	1.00001																					51.217	4.365	1.35939	1.5589
			50.242	2.979	1.15344	0.798879																					41.765	3.176	1.10852	1.13426
			53.41	3.429	1.22617	0.919556																					47.153	3.412	1.25152	1.21855
			49.192	3.553	1.12934	0.952809																					45.066	3.303	1.19613	1.17962
			50.535	3.316	1.16017	0.889253																					45.1	3.283	1.19703	1.17248
			49.284	3.245	1.13145	0.870213																					48.811	3.511	1.29553	1.2539
			42.283	3.629	0.970722	0.97319																					37.93	3.548	1.00673	1.26712
			41.844	3.339	0.960644	0.895421																					41.987	3.4	1.11441	1.21426
			57.556	3.217	1.32136	0.862704																					42.537	3.385	1.12901	1.2089
			40.204	3.06	0.922993	0.820601																					58.479	4.209	1.55214	1.50318
			47.112	3.503	1.08158	0.939401																					49.385	3.283	1.31077	1.17248
			47.86	3.586	1.09876	0.961659																					34.452	3.282	0.914417	1.17212
			58.981	3.095	1.35407	0.829987																					45.196	3.544	1.19958	1.26569
			51.278	4.047	1.17723	1.08529																					45.971	3.598	1.22015	1.28497
			55.542	3.413	1.27512	0.915265																					51.409	3.847	1.36449	1.3739
			43.622	3.369	1.00146	0.903466																					52.12	3.551	1.38336	1.26819
			59.71	3.104	1.37081	0.832401																					44.042	3.549	1.16895	1.26748
			51.223	3.446	1.17596	0.924115																					55.584	3.586	1.4753	1.28069
			50.848	2.697	1.16736	0.723255																					50.819	3.318	1.34883	1.18498
			38.868	3.197	0.892321	0.85734																					54.375	3.925	1.44321	1.40176
			58.966	3.607	1.35373	0.96729																					59.646	3.556	1.58311	1.26998
			0.462	0.875	0.0106065	0.234649																					44.56	3.808	1.1827	1.35997
			48.749	3.407	1.11917	0.913656																					48.641	4.177	1.29102	1.49176
			50.497	3.557	1.1593	0.953882																					44.675	3.586	1.18575	1.28069
			51.523	3.127	1.18285	0.838569																					47.976	3.605	1.27337	1.28747
			45.008	3.524	1.03328	0.945032																					51.95	3.894	1.37884	1.39069
			51.089	2.86	1.17289	0.766967																					42.963	3.469	1.14031	1.2389
			43.217	3.362	0.992165	0.901589																					49.205	3.549	1.30599	1.26748
			47.813	2.664	1.09768	0.714406																					45.169	3.733	1.19887	1.33319
			54.598	3.463	1.25345	0.928674																					52.64	4.008	1.39716	1.4314
			55.942	2.921	1.2843	0.783325																					37.165	3.899	0.986425	1.39247
			52.405	3.144	1.2031	0.843127																					39.775	3.309	1.0557	1.18176
			51.119	3.596	1.17358	0.96434																					51.324	3.859	1.36223	1.37819
			47.972	3.351	1.10133	0.898639																					33.35	3.357	0.885168	1.19891
			53.935	2.926	1.23823	0.784666																					49.099	3.099	1.30317	1.10676
			50.989	3.23	1.17059	0.86619																					51.779	4.259	1.37431	1.52104
			59.491	3.676	1.36578	0.985794																					54.492	3.894	1.44631	1.39069
			57.505	3.778	1.32018	1.01315																					61.437	4.286	1.63065	1.53068
			58.638	3.527	1.3462	0.945837																					32.099	1.656	0.851964	0.591417
			48.83	3.449	1.12103	0.924919																					33.279	2.297	0.883283	0.820341
			57.911	3.019	1.32951	0.809606																					40.296	1.938	1.06953	0.692129
			65.825	3.058	1.51119	0.820065																					46.326	2.202	1.22957	0.786413
			51.365	3.22	1.17922	0.863508																					31.065	1.935	0.82452	0.691058
			51.663	3.333	1.18607	0.893812																					43.136	2.293	1.14491	0.818913
			59.762	3.482	1.372	0.933769																					38.245	2.129	1.01509	0.760342
			23.191	3.694	0.532413	0.990621																					36.157	2.217	0.959671	0.79177
			23.71	3.367	0.544328	0.902929																					29.864	2.423	0.792643	0.86534
			42.062	3.915	0.965648	1.04989																					39.415	2.13	1.04614	0.760699
			46.26	3.429	1.06202	0.919556																					42.844	2.284	1.13716	0.815698
			61.215	3.366	1.40536	0.902661																					31.683	2.073	0.840923	0.740343
			52.399	3.309	1.20296	0.887376																					29.952	2.112	0.794979	0.754271
			61.111	3.092	1.40297	0.829183																					48.119	2.505	1.27716	0.894625
			50.102	3.713	1.15023	0.995716																					27.751	1.76	0.736561	0.628559
			59.912	3.277	1.37544	0.878794																					37.882	1.729	1.00546	0.617488
			41.947	4.056	0.963008	1.0877																					36.784	2.09	0.976312	0.746414
			62.415	3.211	1.43291	0.861095																					37.736	2.132	1.00158	0.761414
			55.333	3.519	1.27032	0.943691																					43.763	2.42	1.16155	0.864269
			51.252	3.694	1.17663	0.990621																					42.4	2.593	1.12537	0.926053
			45.44	3.406	1.0432	0.913388																					38.762	1.91	1.02881	0.68213
			53.148	3.51	1.22016	0.941278																					41.861	2.153	1.11106	0.768914
			62.042	3.762	1.42434	1.00886																					34.799	2.416	0.923627	0.86284
			47.93	3.522	1.10036	0.944496																					32.94	2.246	0.874286	0.802127
			47.897	3.363	1.09961	0.901857																					43.219	2.298	1.14711	0.820698
			49.326	3.487	1.13241	0.93511																					38.611	2.307	1.0248	0.823912
			46.642	3.185	1.07079	0.854122																					43.909	2.28	1.16542	0.81427
			65.413	3.256	1.50173	0.873163																					47.142	2.258	1.25123	0.806413
			51.216	3.641	1.1758	0.976408																					46.285	2.955	1.22849	1.05534
			43.326	3.727	0.994667	0.999471																					40.65	2.192	1.07892	0.782842
			53.179	3.425	1.22087	0.918483																					31.145	1.991	0.826643	0.711058
			63.038	3.33	1.44721	0.893007																					30.239	1.927	0.802596	0.688201
			40.293	3.428	0.925036	0.919288																					38.914	2.968	1.03285	1.05998
			47.072	3.407	1.08067	0.913656																					37.539	2.286	0.996351	0.816413
			47.118	3.576	1.08172	0.958977																					40.242	2.511	1.06809	0.896768
			46.387	3.531	1.06494	0.946909																					39.626	3.037	1.05174	1.08462
			56.246	3.13	1.29128	0.839373																					40.841	2.984	1.08399	1.06569
			56.747	3.099	1.30278	0.83106																					45.461	2.61	1.20662	0.932125
			51.015	3.991	1.17119	1.07027																					31.062	2.408	0.82444	0.859983
			61.552	3.78	1.41309	1.01368																					40.183	2.796	1.06653	0.998552
			49.256	3.061	1.13081	0.820869																					45.449	3.144	1.2063	1.12284
			53.988	3.026	1.23944	0.811483																					37.605	3.181	0.998103	1.13605
			47.259	3.332	1.08496	0.893543																					37.192	2.009	0.987141	0.717486
			49.536	3.744	1.13723	1.00403																					37.157	2.931	0.986212	1.04677
			0.214	5.016	0.00491296	1.34514																					51.406	3.028	1.36441	1.08141
			48.11	3.34	1.1045	0.895689																					32.525	2.53	0.863271	0.903554
			45.733	2.948	1.04993	0.790566																					38.969	3.386	1.03431	1.20926
			44.32	3.47	1.01749	0.930551																					53.238	3.493	1.41303	1.24748
			45.884	3.96	1.05339	1.06195																					36.703	2.925	0.974162	1.04462
			50.785	3.49	1.16591	0.935914																					42.475	3.653	1.12736	1.30462
			60.99	3.157	1.40019	0.846614																					37.178	2.458	0.98677	0.87784
			44.614	3.167	1.02424	0.849295																					34.561	3.406	0.91731	1.2164
			50.915	2.987	1.16889	0.801025																					19.811	2.978	0.525819	1.06355
			48.199	3.139	1.10654	0.841787																					50.503	3.088	1.34044	1.10284
			60.241	3.312	1.383	0.88818																					52.492	3.578	1.39323	1.27783
			50.928	3.487	1.16919	0.93511																					44.376	3.136	1.17782	1.11998
			51.936	2.999	1.19233	0.804243																					42.963	3.688	1.14031	1.31712
			47.179	3.811	1.08312	1.022																					46.687	3.556	1.23916	1.26998
			46.569	3.423	1.06912	0.917947																					40.053	2.95	1.06308	1.05355
			52.344	3.611	1.2017	0.968363																					46.153	2.939	1.22498	1.04962
			62.76	3.486	1.44083	0.934842																					43.942	3.344	1.1663	1.19426
			62.021	3.466	1.42386	0.929478																					35.958	2.412	0.954389	0.861412
			44.262	3.161	1.01616	0.847686																					40.844	3.318	1.08407	1.18498
			44.372	3.32	1.01868	0.890325																					54.789	3.482	1.4542	1.24355
			32.201	3.577	0.739262	0.959245																					31.12	2.851	0.82598	1.01819
			47.135	3.459	1.08211	0.927601																					37.428	3.77	0.993405	1.3464
			55.319	3.985	1.27	1.06866																					42.335	3.667	1.12365	1.30962
			39.73	3.399	0.912111	0.911511																					38.391	2.442	1.01896	0.872126
			56.149	2.875	1.28905	0.77099																					39.576	2.647	1.05042	0.945339
			51.922	3.487	1.19201	0.93511																					51.098	3.817	1.35623	1.36319
			41.664	3.414	0.956511	0.915533																					41.138	4.353	1.09188	1.55461
			44.208	3.629	1.01492	0.97319																					46.805	4.066	1.24229	1.45211
			51.846	3.876	1.19027	1.03943																					32.664	3.287	0.86696	1.17391
			39.194	2.928	0.899806	0.785203																					43.024	3.014	1.14193	1.07641
			50.27	3.507	1.15409	0.940473																					35.252	2.411	0.93565	0.861055
			50.303	4.185	1.15484	1.12229																					35.934	3.621	0.953752	1.29319
			45.869	3.491	1.05305	0.936183																					38.462	2.961	1.02085	1.05748
			48.296	3.467	1.10877	0.929746																					44.549	3.727	1.18241	1.33105
			55.111	3.463	1.26522	0.928674																					32.479	3.79	0.86205	1.35354
			47.911	4.128	1.09993	1.10701																					37.389	3.871	0.99237	1.38247
			39.592	3.149	0.908943	0.844468																					42.458	3.749	1.12691	1.3389
			47.116	3.946	1.08168	1.0582																					36.92	3.731	0.979922	1.33247
			47.395	3.459	1.08808	0.927601																					49.287	3.535	1.30816	1.26248
			48.551	3.461	1.11462	0.928137																					44.806	4.445	1.18923	1.58747
			42.636	4.059	0.978826	1.0885																					52.612	3.661	1.39642	1.30747
			51.847	3.559	1.19029	0.954418																					46.95	4.291	1.24614	1.53247
			40.079	2.241	0.920123	0.60097																					36.467	2.962	0.967899	1.05784
			41.805	2.167	0.959748	0.581125																					29.36	4.159	0.779266	1.48533
			44.302	2.126	1.01707	0.57013																					42.452	2.65	1.12675	0.94641
			41.562	2.253	0.95417	0.604188																					43.32	4.055	1.14979	1.44819
			46.123	2.278	1.05888	0.610892																					41.218	3.272	1.094	1.16855
			49.68	2.11	1.14054	0.565839																					39.009	3.949	1.03537	1.41033
			45.71	2.273	1.0494	0.609551																					37.016	3.874	0.98247	1.38354
			44.583	2.579	1.02352	0.691611																					41.259	4.03	1.09509	1.43926
			39.537	2.113	0.90768	0.566644																					39.501	3.926	1.04843	1.40212
			41.105	2.185	0.943678	0.585952																					50.769	3.917	1.3475	1.3989
			40.654	2.013	0.933324	0.539827																					40.818	3.522	1.08338	1.25783
			36.6	2.66	0.840253	0.713333																					43.356	3.849	1.15074	1.37462
			43.425	2.234	0.99694	0.599092																					45.29	4.594	1.20208	1.64068
			40.986	2.75	0.940946	0.737468																					39.255	3.993	1.0419	1.42604
			39.617	2.294	0.909517	0.615183																					46.298	3.922	1.22883	1.40069
			38.463	2.33	0.883023	0.624837																					47.968	3.974	1.27316	1.41926
			37.969	2.272	0.871682	0.609283																					26.163	2.762	0.694412	0.986409
			35.412	2.065	0.812979	0.553772																					43.454	4.344	1.15335	1.5514
			46.788	2.284	1.07415	0.612501																					45.117	3.8	1.19748	1.35712
			56.76	2.953	1.30308	0.791907																					51.051	4.308	1.35498	1.53854
			46.301	2.316	1.06297	0.621082																					46.322	4.014	1.22947	1.43354
			43.797	2.481	1.00548	0.665331																					32.302	2.785	0.857352	0.994623
			43.494	2.082	0.998524	0.558331																					56.673	3.69	1.5042	1.31783
			47.231	2.077	1.08432	0.55699																					39.911	3.863	1.05931	1.37962
			41.74	2.174	0.958256	0.583002																					36.159	4.198	0.959724	1.49926
			47.491	2.564	1.09029	0.687589																					28.013	4.141	0.743515	1.4789
			46.326	2.705	1.06354	0.725401																					32.265	4.293	0.85637	1.53318
			66.376	3.046	1.52384	0.816847																					34.322	4.274	0.910967	1.5264
			39.729	2.654	0.912088	0.711724																					27.446	4.03	0.728465	1.43926
			35.828	2.17	0.82253	0.58193																					35.288	3.106	0.936606	1.10926
			49.411	2.262	1.13436	0.606601																					24.786	3.413	0.657864	1.2189
			42.195	2.166	0.968702	0.580857																					34.107	4.076	0.90526	1.45569
			38.624	2.236	0.88672	0.599629																					44.25	3.924	1.17447	1.4014
			66.958	3.111	1.5372	0.834278																					46.184	3.775	1.2258	1.34819
			22.754	2.31	0.52238	0.619473																					43.147	3.481	1.1452	1.24319
			36.558	2.085	0.839289	0.559135																					50.004	4.506	1.32719	1.60925
			34.06	2.186	0.781941	0.58622																					30.542	3.606	0.810639	1.28783
			51.205	3.412	1.17555	0.914997																					27.233	3.955	0.722812	1.41247
			33.905	2.097	0.778382	0.562353																					35.843	4.123	0.951337	1.47247
			40.848	2.386	0.937778	0.639854																					44.309	3.848	1.17604	1.37426
			37.038	2.137	0.850309	0.57308																					41.475	3.229	1.10082	1.15319
			41.824	2.748	0.960184	0.736932																					52.716	4.157	1.39918	1.48461
			36.859	2.093	0.846199	0.56128																					43.753	3.893	1.16128	1.39033
			49.257	2.543	1.13083	0.681957																					33.795	4.322	0.896979	1.54354
			55.856	3.082	1.28233	0.826501																					30.745	3.765	0.816027	1.34462
			39.994	2.282	0.918172	0.611965																					36.656	3.298	0.972915	1.17783
			47.369	2.518	1.08749	0.675253																					0.32	3.341	0.00849337	1.19319
			37.665	2.366	0.864703	0.634491																					41.924	3.874	1.11274	1.38354
			41.788	2.506	0.959358	0.672035																					47.613	3.304	1.26373	1.17998
			50.468	2.367	1.15863	0.634759																					46.818	4.02	1.24263	1.43569
			46.348	3.152	1.06405	0.845273																					42.958	2.966	1.14018	1.05927
			39.005	2.268	0.895467	0.60821																					41.898	4.055	1.11205	1.44819
			30.555	2.897	0.701474	0.776889																					49.493	3.633	1.31363	1.29747
			27.691	2.604	0.635723	0.698315																					53.451	4.018	1.41868	1.43497
			49.656	2.785	1.13999	0.746854																					37.041	3.432	0.983134	1.22569
			37.583	2.442	0.862821	0.654872																					45.691	3.417	1.21272	1.22033
			27.941	2.58	0.641462	0.691879																					48.64	3.886	1.29099	1.38783
			40.671	2.789	0.933714	0.747927																					34.292	4.139	0.91017	1.47819
			44.028	2.362	1.01078	0.633418																					37.83	3.292	1.00408	1.17569
			30.715	2.258	0.705147	0.605529																					37.279	3.472	0.989451	1.23998
			37.818	2.602	0.868216	0.697779																					41.726	4.301	1.10748	1.53604
			29.679	3.194	0.681363	0.856536																					34.854	3.203	0.925087	1.14391
			40.217	2.107	0.923291	0.565035																					40.874	3.221	1.08487	1.15033
			48.655	2.938	1.11701	0.787884																					0.715	3.778	0.0189774	1.34926
			37.248	2.324	0.85513	0.623228																					29.945	3.486	0.794793	1.24498
			30.252	1.975	0.694518	0.529636																					47.48	3.8	1.2602	1.35712
			47.744	2.119	1.09609	0.568253																					34.314	3.2	0.910754	1.14283
			40.874	2.624	0.938375	0.703679																					0.425	2.385	0.0112803	0.851769
			45.833	3.243	1.05222	0.869676																					38.73	3.597	1.02796	1.28462
			43.083	2.216	0.989088	0.594265																					58.938	4.153	1.56432	1.48319
			20.568	1.954	0.472195	0.524005																					29.23	4.185	0.775816	1.49461
			9.943	1.048	0.228269	0.281042																					42.942	3.403	1.13976	1.21533
			40.649	2.898	0.933209	0.777158																					42.705	4.206	1.13347	1.50211
			45.403	2.661	1.04235	0.713601																					30.901	3.076	0.820167	1.09855
			34.615	2.606	0.794682	0.698852																					34.854	3.565	0.925087	1.27319
			47.076	3.069	1.08076	0.823015																					32.418	3.448	0.860431	1.2314
			42.401	2.364	0.973431	0.633955																					28.847	4.143	0.76565	1.47961
			53.318	3.01	1.22406	0.807193																					29.513	3.723	0.783327	1.32962
			37.16	2.279	0.85311	0.61116																					32.052	2.782	0.850717	0.993552
			42.694	3.08	0.980158	0.825965																					33.548	3.032	0.890423	1.08284
			36.557	2.554	0.839266	0.684907																					39.975	3.285	1.06101	1.17319
			48.827	2.64	1.12096	0.70797																					38.059	3.02	1.01015	1.07855
			44.259	2.8	1.01609	0.750877																					38.949	2.939	1.03378	1.04962
			32.335	2.093	0.742338	0.56128																					50.139	3.415	1.33078	1.21962
			50.832	2.902	1.16699	0.77823																					52.705	3.917	1.39888	1.3989
			41.479	3.022	0.952264	0.810411																					35.658	2.828	0.946426	1.00998
			43.129	2.277	0.990144	0.610624																					33.873	3.578	0.899049	1.27783
			38.919	2.594	0.893492	0.695634																					36.128	3.135	0.958901	1.11962
			50.411	2.86	1.15732	0.766967																					0.299	2.943	0.00793599	1.05105
			36.124	2.542	0.829325	0.681689																					24.635	2.807	0.653856	1.00248
			37.187	2.313	0.853729	0.620278																					51.051	4.37	1.35498	1.56068
			19.538	1.564	0.448548	0.419418																					31.849	2.022	0.845329	0.722129
			16.8	2.24	0.38569	0.600701																					28.161	1.596	0.747443	0.569989
			39.251	2.7	0.901114	0.72406																					27.987	1.888	0.742824	0.674273
			44.435	2.607	1.02013	0.69912																					34.958	2.174	0.927847	0.776413
			54.184	3.052	1.24394	0.818456																					34.163	1.543	0.906746	0.551061
			25.522	3.469	0.585927	0.930283																					0.27	3.189	0.00716628	1.13891
			37.411	2.736	0.858872	0.733714																					34.411	1.956	0.913329	0.698558
			46.569	2.839	1.06912	0.761335																					38.558	2.01	1.0234	0.717843
			8.909	0.956	0.20453	0.256371																					39.23	3.154	1.04123	1.12641
			29.567	2.234	0.678791	0.599092																					43.776	1.825	1.16189	0.651773
			47.137	3.093	1.08216	0.829451																					33.964	2.476	0.901465	0.884268
			60.058	2.991	1.3788	0.802097																					33.515	2.063	0.889547	0.736771
			30.171	2.358	0.692658	0.632346																					29.63	2.098	0.786433	0.749271
			39.934	2.669	0.916794	0.715747																					33.961	2.328	0.901385	0.831412
			41.069	2.906	0.942851	0.779303																					54.422	2.783	1.44446	0.993909
			41.127	2.493	0.944183	0.668549																					36.634	1.996	0.972331	0.712843
			53.592	2.714	1.23035	0.727814																					37.386	2.244	0.992291	0.801413
			54.269	2.863	1.24589	0.767772																					55.856	3.305	1.48252	1.18033
			37.693	2.596	0.865346	0.69617																					30.618	1.85	0.812656	0.660701
			41.024	3.202	0.941818	0.858681																					39.916	2.9	1.05944	1.03569
			42.684	2.86	0.979928	0.766967																					38.22	2.299	1.01443	0.821055
			54.758	2.829	1.25712	0.758654																					39.311	2.721	1.04338	0.971767
			44.071	3.017	1.01177	0.80907																					34.045	1.955	0.903614	0.698201
			35.135	2.856	0.80662	0.765894																					52.257	3.645	1.38699	1.30176
			34.575	2.881	0.793764	0.772599																					49.766	2.324	1.32088	0.829984
			46.886	2.666	1.0764	0.714942																					40.446	2.594	1.07351	0.92641
			45.705	2.765	1.04928	0.741491																					37.89	2.372	1.00567	0.847126
			52.79	3.007	1.21194	0.806388																					51.023	3.932	1.35424	1.40426
			48.172	2.856	1.10592	0.765894																					43.527	2.932	1.15528	1.04712
			40.284	2.62	0.92483	0.702606																					31.201	2.605	0.82813	0.930339
			31.508	2.776	0.723352	0.744441																					0.417	5	0.0110679	1.78568
			50.852	3.033	1.16745	0.813361																					41.575	2.174	1.10347	0.776413
			39.378	2.708	0.90403	0.726205																					39.983	3.263	1.06122	1.16533
			54.175	2.967	1.24374	0.795661																					49.805	2.866	1.32191	1.02355
			35.002	2.719	0.803567	0.729155																					33.871	2.175	0.898996	0.776771
			44.991	2.856	1.03289	0.765894																					45.615	2.684	1.2107	0.958553
			44.326	2.644	1.01762	0.709042																					37.21	1.831	0.987619	0.653916
			37.983	2.942	0.872004	0.788957																					34.23	2.18	0.908525	0.778556
			60.183	2.932	1.38167	0.786275																					35.025	2.597	0.929625	0.927482
			37.348	3.09	0.857426	0.828646																					64.384	4.225	1.70887	1.5089
			43.804	2.944	1.00564	0.789493																					36.616	1.984	0.971853	0.708558
			46.813	2.613	1.07472	0.700729																					43.336	3.252	1.15021	1.16141
			67.007	2.816	1.53833	0.755168																					39.373	3.034	1.04503	1.08355
			28.255	2.125	0.648671	0.569862																					29.929	2.015	0.794369	0.719629
			33.54	2.821	0.770003	0.756508																					25.129	2.171	0.666968	0.775342
			46.018	3.059	1.05647	0.820333																					35.747	2.253	0.948789	0.804627
			42.084	2.865	0.966153	0.768308																					41.128	2.857	1.09161	1.02034
			45.946	2.846	1.05482	0.763213																					41.599	4.339	1.10411	1.54961
			45.157	3.102	1.0367	0.831864																					35.521	2.445	0.94279	0.873197
			49.663	3.283	1.14015	0.880403																					39.26	3.353	1.04203	1.19748
			38.695	3.061	0.88835	0.820869																					35.228	2.392	0.935013	0.854269
			42.748	2.881	0.981397	0.772599																					52.703	3.293	1.39883	1.17605
			40.626	3.115	0.932681	0.83535																					26.77	2.139	0.710523	0.763914
			46.07	3.158	1.05766	0.846882																					35.376	2.378	0.938942	0.849269
			50.564	2.684	1.16084	0.719769																					33.629	2.23	0.892573	0.796413
			38.882	2.392	0.892643	0.641463																					28.012	3.009	0.743488	1.07462
			42.613	3.104	0.978298	0.832401																					55.356	4.034	1.46925	1.44069
			40.308	2.626	0.925381	0.704215																					40.315	3.627	1.07003	1.29533
			36.438	2.062	0.836534	0.552967																					37.361	2.544	0.991627	0.908554
			38.62	3.203	0.886628	0.858949																					39.212	2.819	1.04076	1.00677
			41.53	2.638	0.953435	0.707433																					49.354	3.221	1.30994	1.15033
			32.353	3.044	0.742752	0.81631																					38.655	3.627	1.02597	1.29533
			48.397	3.222	1.11109	0.864045																					43.338	3.806	1.15027	1.35926
			45.71	3.093	1.0494	0.829451																					38.701	2.303	1.02719	0.822484
			28.53	2.086	0.654984	0.559403																					37.342	3.33	0.991123	1.18926
			43.342	2.807	0.995034	0.752754																					55.888	4.013	1.48337	1.43319
			47.895	3.25	1.09956	0.871553																					47.845	3.422	1.26989	1.22212
			33.378	2.817	0.766283	0.755436																					46.565	3.524	1.23592	1.25855
			47.119	2.814	1.08175	0.754631																					26.348	2.144	0.699322	0.765699
			39.549	2.572	0.907956	0.689734																					44.632	2.921	1.18461	1.04319
			45.031	3.398	1.03381	0.911243																					39.881	2.696	1.05851	0.962838
			54.243	2.862	1.2453	0.767503																					20.65	2.441	0.548087	0.871769
			41.453	2.736	0.951667	0.733714																					33.372	3.765	0.885752	1.34462
			44.075	3.14	1.01186	0.842055																					51.288	3.056	1.36127	1.09141
			39.232	3.14	0.900678	0.842055																					40.404	3.069	1.07239	1.09605
			41.521	2.959	0.953228	0.793516																					39.446	2.384	1.04697	0.851412
			34.828	2.581	0.799572	0.692148																					43.47	3.099	1.15377	1.10676
			42.311	3.377	0.971365	0.905611																					35.073	3.494	0.930899	1.24783
			48.169	2.579	1.10585	0.691611																					28.753	2.998	0.763155	1.07069
			59.262	2.685	1.36052	0.720037																					52.485	3	1.39304	1.07141
			40.152	3.038	0.921799	0.814701																					40.799	2.884	1.08288	1.02998
			37.574	3.111	0.862614	0.834278																					34.268	2.447	0.909533	0.873912
			41.423	2.631	0.950978	0.705556																					47.419	3.256	1.25858	1.16283
			47.86	3.182	1.09876	0.853318																					38.914	2.95	1.03285	1.05355
			47.324	3.069	1.08645	0.823015																					34.551	2.267	0.917045	0.809627
			40.13	2.818	0.921294	0.755704																					28.551	2.662	0.757794	0.950696
			45.767	2.826	1.05071	0.757849																					48.681	3.353	1.29208	1.19748
			46.625	3.031	1.0704	0.812824																					41.698	3.019	1.10674	1.07819
			36.412	3.06	0.835937	0.820601																					36.395	2.767	0.965988	0.988195
			43.014	2.828	0.987504	0.758386																					47.453	3.267	1.25949	1.16676
			46.038	2.475	1.05693	0.663722																					43.915	2.782	1.16558	0.993552
			37.41	2.579	0.858849	0.691611																					33.708	2.909	0.89467	1.03891
			37.182	2.57	0.853615	0.689198																					41.447	2.948	1.10008	1.05284
			46.577	2.741	1.0693	0.735055																					26.174	2.706	0.694704	0.96641
			39.033	2.943	0.896109	0.789225																					33.337	2.68	0.884823	0.957124
			41.615	3.098	0.955386	0.830792																					40.027	3.054	1.06239	1.09069
			38.922	2.909	0.893561	0.780107																					42.401	2.798	1.1254	0.999266
			40.564	3.163	0.931258	0.848223																					34.287	2.671	0.910038	0.95391
			54.014	2.536	1.24004	0.68008																					47.378	2.744	1.2575	0.979981
			40.158	2.598	0.921937	0.696706																					35.263	2.737	0.935942	0.977481
			43.073	2.907	0.988859	0.779571																					44.063	3.388	1.16951	1.20998
			42.078	2.798	0.966016	0.750341																					34.476	2.538	0.915054	0.906411
			33.188	2.48	0.761921	0.665062																					35.209	2.643	0.934509	0.94391
			37.152	2.641	0.852926	0.708238																					22.532	2.453	0.598039	0.876054
			45.983	3.086	1.05567	0.827574																					42.573	2.542	1.12996	0.907839
			38.143	3.341	0.875677	0.895957																					38.598	2.655	1.02446	0.948196
			41.075	3.38	0.942989	0.906416																					43.446	2.811	1.15313	1.00391
			41.921	2.56	0.962411	0.686516																					43.68	2.979	1.15934	1.06391
			37.912	2.431	0.870374	0.651922																					35.722	2.855	0.948125	1.01962
			40.455	2.618	0.928755	0.70207																					36.452	2.729	0.9675	0.974624
			34.733	2.505	0.797391	0.671767																					42.004	2.522	1.11486	0.900697
			37.737	2.853	0.866356	0.76509																					37.722	2.811	1.00121	1.00391
			43.619	2.903	1.00139	0.778498																					31.124	2.751	0.826086	0.982481
			40.463	2.791	0.928939	0.748463																					37.285	2.709	0.98961	0.967481
			32.626	2.533	0.749019	0.679275																					35.259	2.901	0.935836	1.03605
			40.099	2.841	0.920582	0.761872																					30.16	2.507	0.8005	0.89534
			53.227	3.304	1.22197	0.886035																					42.223	2.77	1.12067	0.989266
			52.693	3.01	1.20971	0.807193																					30.797	3.128	0.817407	1.11712
			44.152	2.617	1.01363	0.701802																					29.772	2.326	0.790201	0.830698
			43.952	3.1	1.00904	0.831328																					26.814	3.214	0.711691	1.14783
			50.688	3.046	1.16368	0.816847																					35.687	2.375	0.947196	0.848198
			47.801	2.734	1.0974	0.733178																					28.168	2.815	0.747628	1.00534
			28.788	2.475	0.660907	0.663722																					26.079	3.179	0.692183	1.13533
			39.874	2.519	0.915417	0.675521																					22.155	3.03	0.588033	1.08212
			34.604	2.431	0.79443	0.651922																					39.326	2.752	1.04378	0.982838
			31.691	2.707	0.727554	0.725937																					45.959	2.745	1.21983	0.980338
			25.343	2.306	0.581818	0.618401																					36.762	2.739	0.975728	0.978195
			41.806	2.679	0.959771	0.718428																					37.356	2.695	0.991494	0.962481
			35.915	2.632	0.824527	0.705824																					34.909	2.678	0.926547	0.95641
			43.848	2.72	1.00665	0.729423																					47.869	2.758	1.27053	0.984981
			39.262	2.598	0.901367	0.696706																					21.718	2.874	0.576434	1.02641
			34.214	2.517	0.785476	0.674985																					39.312	2.878	1.04341	1.02784
			47.408	2.844	1.08838	0.762676																					36.534	2.583	0.969677	0.922482
			37.948	2.165	0.8712	0.580589																					43.256	2.838	1.14809	1.01355
			37.587	2.653	0.862913	0.711456																					35.287	2.508	0.936579	0.895697
			28.758	2.032	0.660219	0.544922																					43.599	2.885	1.15719	1.03034
			44.783	2.45	1.02812	0.657017																					34.982	2.487	0.928484	0.888197
			39.934	2.332	0.916794	0.625373																					26.208	2.576	0.695607	0.919982
			36.949	2.573	0.848265	0.690002																					42.57	2.695	1.12988	0.962481
			35.854	2.354	0.823127	0.631273																					41.808	2.513	1.10966	0.897482
			47.915	2.432	1.10002	0.65219																					41.914	2.751	1.11247	0.982481
			46.257	2.54	1.06196	0.681153																					39.223	2.918	1.04105	1.04212
			42.595	2.819	0.977885	0.755972																					36.028	2.893	0.956247	1.03319
			34.012	2.059	0.780839	0.552163																					30.477	2.821	0.808913	1.00748
			57.472	2.826	1.31943	0.757849																					25.32	2.062	0.672038	0.736414
			50.176	2.713	1.15193	0.727546																					30.843	2.511	0.818628	0.896768
			44.751	2.571	1.02738	0.689466																					36.194	2.72	0.960653	0.97141
			35.381	2.616	0.812268	0.701534																					32.841	2.713	0.871658	0.96891
			48.138	2.409	1.10514	0.646022																					35.986	2.52	0.955132	0.899982
			48.974	2.434	1.12433	0.652727																					53.123	2.755	1.40998	0.983909
			32.692	2.344	0.750534	0.628591																					22.866	2.469	0.606904	0.881768
			48.859	2.517	1.12169	0.674985																					46.233	2.753	1.22711	0.983195
			38.996	2.049	0.89526	0.549481																					36.782	2.342	0.976259	0.836412
			44.006	2.649	1.01028	0.710383																					29.717	2.849	0.788742	1.01748
			34.61	2.151	0.794567	0.576834																					45.819	2.917	1.21612	1.04177
			52.376	2.595	1.20243	0.695902																					31.114	2.481	0.825821	0.886054
			39.474	2.362	0.906234	0.633418																					38.782	2.572	1.02934	0.918553
			36.66	2.424	0.841631	0.650045																					37.744	2.888	1.00179	1.03141
			49.283	2.426	1.13143	0.650581																					41.649	2.84	1.10544	1.01427
			36.723	2.629	0.843077	0.70502																					30.898	2.334	0.820088	0.833555
			34.326	1.854	0.788047	0.497188																					26.706	2.661	0.708824	0.950339
			52.259	2.642	1.19975	0.708506																					27.965	2.116	0.742241	0.7557
			52.481	2.558	1.20485	0.68598																					35.392	2.812	0.939366	1.00427
			39.194	2.211	0.899806	0.592925																					21.517	1.878	0.571099	0.670701
			16.202	1.21	0.371961	0.324486																					47.42	2.919	1.25861	1.04248
			27.142	1.862	0.623119	0.499333																					35.677	3.053	0.946931	1.09034
			35.603	2.507	0.817364	0.672303																					29.401	2.922	0.780354	1.04355
			34	2.248	0.780563	0.602847																					41.756	2.691	1.10828	0.961053
			36.204	1.993	0.831162	0.534463																					43.406	2.439	1.15207	0.871054
			36.6	2.32	0.840253	0.622155																					39.007	2.829	1.03531	1.01034
			44.548	2.878	1.02272	0.771794																					29.86	2.635	0.792537	0.941053
			42.833	2.131	0.983349	0.571471																					34.343	1.773	0.911524	0.633202
			32.678	2.073	0.750213	0.555917																					28.52	2.616	0.756971	0.934267
			45.397	2.06	1.04221	0.552431																					44.794	2.797	1.18891	0.998909
			43.266	2.718	0.99329	0.728887																					33.159	2.256	0.880098	0.805699
			39.319	2.455	0.902675	0.658358																					28.027	2	0.743886	0.714272
			39.022	2.236	0.895857	0.599629																					37.162	2.728	0.986345	0.974267
			44.708	2.777	1.02639	0.744709																					37.778	2.513	1.00269	0.897482
			32.316	2.143	0.741902	0.574689																					34.806	2.398	0.923813	0.856412
			38.744	2.184	0.889475	0.585684																					48.753	3.068	1.29399	1.09569
			38.771	2.345	0.890094	0.628859																					55.011	3.589	1.46009	1.28176
			43.182	2.463	0.991361	0.660503																					46.751	2.965	1.24085	1.05891
			55.586	2.941	1.27613	0.788689																					43.481	3.405	1.15406	1.21605
			38.415	2.016	0.881922	0.540631																					53.646	3.461	1.42386	1.23605
			37.063	1.986	0.850883	0.532586																					45.766	3.379	1.21471	1.20676
			39.711	2.392	0.911675	0.641463																					42.19	3.323	1.1198	1.18676
			48.533	2.603	1.11421	0.698047																					46.136	3.438	1.22453	1.22783
			29.802	2.668	0.684187	0.715478																					51.531	3.344	1.36772	1.19426
			30.002	1.829	0.688778	0.490483																					49.879	3.342	1.32388	1.19355
			31.518	1.785	0.723582	0.478684																					43.272	2.662	1.14852	0.950696
			25.651	2.164	0.588889	0.580321																					51.276	3.054	1.36096	1.09069
			32.538	2.099	0.746999	0.562889																					37.82	2.609	1.00381	0.931768
			40.575	2.529	0.93151	0.678203																					33.075	2.659	0.877869	0.949624
			47.088	2.746	1.08103	0.736396																					49.978	3.017	1.3265	1.07748
			44.066	2.513	1.01166	0.673912																					48.628	2.713	1.29067	0.96891
			29.744	1.682	0.682855	0.451062																					43.843	2.354	1.16367	0.840698
			44.952	2.898	1.032	0.777158																					59.237	3.632	1.57225	1.29712
			40.334	2.602	0.925977	0.697779																					56.902	3.07	1.51028	1.09641
			34.603	2.305	0.794407	0.618133																					55.216	2.694	1.46553	0.962124
			30.566	1.748	0.701726	0.468762																					36.418	2.238	0.966598	0.79927
			32.255	1.758	0.740502	0.471443																					26.111	2.353	0.693032	0.840341
			35.351	2.057	0.811579	0.551626																					49.654	2.388	1.3179	0.85284
			41.854	2.415	0.960873	0.647631																					56.364	3.438	1.496	1.22783
			0.134	1.465	0.00307634	0.392869																					39.205	2.228	1.04057	0.795699
			36.887	2.226	0.846842	0.596947																					58.609	2.91	1.55559	1.03927
			29.872	2.452	0.685794	0.657554																					42.609	2.338	1.13092	0.834984
			0.327	5.277	0.00750718	1.41513																					78.68	4.079	2.08831	1.45676
			0.298	10.504	0.00684141	2.81686																					44.119	2.324	1.171	0.829984
			53.958	5.741	1.23875	1.53957																					49.66	2.686	1.31806	0.959267
			48.44	4.965	1.11207	1.33147																					40.005	2.327	1.0618	0.831055
			47.088	5.002	1.08103	1.34139																					33.917	2.1	0.900217	0.749985
			46.29	4.586	1.06271	1.22983																					29.625	2.274	0.7863	0.812127
			46.962	5.091	1.07814	1.36526																					36.635	2.397	0.972358	0.856055
			49.088	4.847	1.12695	1.29982																					39.046	2.311	1.03635	0.825341
			48.172	4.373	1.10592	1.17271																					50.991	2.791	1.35339	0.996766
			38.76	4.59	0.889842	1.2309																					62.638	3.749	1.66252	1.3389
			43.094	4.317	0.989341	1.15769																					32.973	2.297	0.875162	0.820341
			25.576	4.683	0.587167	1.25584																					44.54	2.642	1.18217	0.943553
			52.694	4.385	1.20974	1.17593																					32.263	2.277	0.856317	0.813198
			43.215	4.374	0.992119	1.17298																					32.301	2.246	0.857326	0.802127
			59.949	3.94	1.37629	1.05659																					39.857	2.244	1.05788	0.801413
			58.863	4.048	1.35136	1.08555																					39.41	2.364	1.04601	0.844269
			53.687	4.241	1.23253	1.13731																					40.066	2.186	1.06342	0.780699
			51.771	4.192	1.18855	1.12417																					34.63	2.148	0.919141	0.767128
			58.056	4.131	1.33283	1.10781																					43.177	2.765	1.14599	0.987481
			53.617	4.493	1.23093	1.20489																					35.827	2.157	0.950912	0.770342
			51.534	4.236	1.1831	1.13597																					43.841	3.381	1.16362	1.20748
			49.501	3.758	1.13643	1.00778																					36.583	2.331	0.970977	0.832484
			51.183	3.674	1.17505	0.985258																					27.748	2.058	0.736481	0.734986
			62.406	3.977	1.4327	1.06651																					38.109	2.264	1.01148	0.808556
			52.937	3.894	1.21531	1.04426																					29.167	2.388	0.774144	0.85284
			54.077	4.119	1.24149	1.10459																					37.748	2.361	1.0019	0.843198
			53.83	4.045	1.23582	1.08475																					30.365	2.283	0.805941	0.815341
			53.915	3.913	1.23777	1.04935																					31.04	2.246	0.823856	0.802127
			50.259	3.704	1.15383	0.993303																					29.435	2.298	0.781257	0.820698
			44.349	4.259	1.01815	1.14214																					37.61	2.172	0.998236	0.775699
			49.221	3.566	1.13	0.956295																					32.644	2.122	0.866429	0.757842
			55.1	4.135	1.26497	1.10888																					34.604	2.246	0.918451	0.802127
			68.087	4.092	1.56312	1.09735																					27.396	2.086	0.727138	0.744985
			50.81	4.311	1.16648	1.15608																					36.733	2.282	0.974959	0.814984
			37.851	4.082	0.868973	1.09467																					31.684	2.271	0.840949	0.811056
			66.79	3.781	1.53335	1.01395																					31.432	2.148	0.834261	0.767128
			51.214	3.854	1.17576	1.03353																					42.641	2.726	1.13177	0.973552
			68.089	3.889	1.56317	1.04291																					36.845	2.209	0.977931	0.788913
			49.912	3.936	1.14587	1.05552																					49.142	2.949	1.30432	1.05319
			54.143	3.846	1.243	1.03138																					31.132	1.954	0.826298	0.697844
			75.19	3.72	1.72619	0.997594																					54.652	3.54	1.45056	1.26426
			54.36	3.894	1.24798	1.04426																					27.015	2.132	0.717026	0.761414
			59.165	4.017	1.35829	1.07724																					35.066	2.412	0.930714	0.861412
			54.822	4.523	1.25859	1.21293																					28.99	1.99	0.769446	0.7107
			63.382	3.782	1.45511	1.01422																					32.571	2.195	0.864492	0.783913
			52.775	3.927	1.21159	1.0531																					31.471	2.095	0.835296	0.7482
			58.631	3.99	1.34604	1.07																					31.795	2.079	0.843895	0.742485
			55.674	4.052	1.27815	1.08663																					25.281	2.067	0.671002	0.7382
			61.614	3.823	1.41452	1.02522																					33.477	2.186	0.888539	0.780699
			56.349	4.021	1.29365	1.07831																					28.88	2.016	0.766526	0.719986
			66.848	4.287	1.53468	1.14965																					27.982	2.272	0.742692	0.811413
			64.092	4.424	1.47141	1.18639																					56.998	3.239	1.51283	1.15676
			71.433	4.136	1.63994	1.10915																					50.784	2.545	1.3479	0.908911
			47.5	3.851	1.09049	1.03272																					33.084	1.988	0.878108	0.709986
			66.428	4.127	1.52504	1.10674																					31.695	2.552	0.841241	0.911411
			48.486	4.063	1.11313	1.08958																					27.2	2.052	0.721936	0.732843
			54.025	4.366	1.24029	1.17083																					26.629	2.308	0.706781	0.82427
			35.38	4.144	0.812245	1.1113																					37.802	2.412	1.00333	0.861412
			57.966	3.944	1.33077	1.05766																					0.79	1.726	0.020968	0.616417
			56.8	4.029	1.304	1.08046																					35.159	2.366	0.933182	0.844983
			59.632	3.997	1.36902	1.07188																					37.584	2.756	0.997546	0.984266
			43.606	4.065	1.0011	1.09011																					31.783	2.151	0.843577	0.768199
			37.28	3.895	0.855864	1.04452																					23.241	1.866	0.616857	0.666416
			55.168	4.29	1.26653	1.15045																					15.679	1.579	0.416148	0.563918
			68.217	4.386	1.56611	1.17619																					34.748	2.13	0.922273	0.760699
			41.079	4.304	0.943081	1.1542																					53.012	3.772	1.40703	1.34712
			46.969	3.924	1.0783	1.0523																					21.213	2.213	0.563031	0.790342
			68.662	3.829	1.57632	1.02682																					30.759	2.123	0.816398	0.758199
			67.68	3.988	1.55378	1.06946																					35.804	2.049	0.950301	0.731771
			71.813	4.067	1.64866	1.09065																					38.327	2.385	1.01727	0.851769
			64.081	4.556	1.47115	1.22178																					37.483	2.815	0.994865	1.00534
			66.88	3.94	1.53541	1.05659																					39.28	2.039	1.04256	0.7282
			70.642	4.306	1.62178	1.15474																					30.317	2.242	0.804667	0.800699
			44.661	4.152	1.02532	1.11344																					44.744	2.596	1.18758	0.927125
			60.612	3.698	1.39151	0.991694																					25.931	2.296	0.688255	0.819984
			56.45	4.149	1.29596	1.11264																					30.299	2.443	0.804189	0.872483
			51.502	3.981	1.18237	1.06759																					41.702	2.992	1.10684	1.06855
			33.096	3.705	0.759809	0.993571																					59.972	4.222	1.59176	1.50783
			61.814	4.025	1.41911	1.07939																					31.82	2.707	0.844559	0.966767
			59.378	3.872	1.36318	1.03836																					39.531	2.631	1.04922	0.939625
			64.917	3.666	1.49035	0.983112																					38.134	2.45	1.01214	0.874983
			68.049	4.056	1.56225	1.0877																					39.963	2.22	1.06069	0.792842
			67.376	4.336	1.5468	1.16279																					28.239	2.572	0.749513	0.918553
			52.944	3.869	1.21547	1.03755																					37.725	2.648	1.00129	0.945696
			63.134	3.95	1.44941	1.05927																					39.366	2.928	1.04484	1.04569
			54.073	3.93	1.24139	1.05391																					35.716	2.467	0.947966	0.881054
			56.473	3.947	1.29649	1.05847																					50.047	3.714	1.32834	1.3264
			61.729	4.259	1.41716	1.14214																					46.362	3.515	1.23053	1.25533
			42.058	3.779	0.965557	1.01342																					45.35	2.846	1.20367	1.01641
			64.333	3.667	1.47694	0.983381																					43.018	2.897	1.14177	1.03462
			63.076	3.868	1.44808	1.03728																					36.209	2.667	0.961051	0.952481
			61.936	4.012	1.42191	1.0759																					46.473	2.753	1.23348	0.983195
			60.511	4.15	1.3892	1.11291																					40.118	2.533	1.0648	0.904625
			52.195	3.689	1.19828	0.98928																					46.786	2.574	1.24178	0.919268
			54.57	3.582	1.2528	0.960586																					26.181	2.644	0.69489	0.944267
			49.879	3.889	1.14511	1.04291																					37.864	2.938	1.00498	1.04927
			69.282	3.722	1.59056	0.99813																					40.358	3.22	1.07117	1.14998
			58.082	3.776	1.33343	1.01261																					56.877	4.229	1.50962	1.51033
			72.271	3.981	1.65918	1.06759																					42.969	3.2	1.14047	1.14283
			59.189	3.742	1.35885	1.00349																					42.504	2.832	1.12813	1.01141
			68.846	4.541	1.58055	1.21776																					45.286	2.951	1.20197	1.05391
			66.089	3.746	1.51725	1.00457																					45.62	2.991	1.21084	1.06819
			51.166	4.354	1.17466	1.16761																					52.864	3.792	1.4031	1.35426
			56	3.564	1.28563	0.955759																					50.048	3.408	1.32836	1.21712
			55.925	4.155	1.28391	1.11425																					49.345	3.06	1.3097	1.09284
			64.197	3.915	1.47382	1.04989																					78.003	4.493	2.07034	1.60461
			56.391	3.781	1.29461	1.01395																					51.091	3.633	1.35605	1.29747
			61.311	3.865	1.40756	1.03648																					42.981	4.361	1.14079	1.55747
			60.098	3.989	1.37971	1.06973																					51.274	3.328	1.3609	1.18855
			57.92	3.952	1.32971	1.05981																					51.449	3.235	1.36555	1.15533
			51.346	4.106	1.17879	1.10111																					0.356	4.486	0.00944887	1.60211
			62.086	3.599	1.42535	0.965145																					60.892	4.48	1.61618	1.59997
			54.827	3.784	1.2587	1.01476																					44.945	3.829	1.19292	1.36747
			67.924	3.511	1.55938	0.941546																					54.17	3.772	1.43777	1.34712
			59.116	4.159	1.35717	1.11532
			78.654	4.196	1.80572	1.12524
			30.638	3.358	0.703379	0.900516
			71.72	3.898	1.64653	1.04533
			58.585	3.802	1.34498	1.01958
			32.728	3.298	0.751361	0.884426
			67.304	4.543	1.54515	1.2183
			46.038	3.36	1.05693	0.901052
			62.247	4.198	1.42905	1.12578
			53.305	4.033	1.22376	1.08153
			55.867	3.595	1.28258	0.964072
			51.412	3.588	1.1803	0.962195
			59.635	3.323	1.36908	0.89113
			49.379	3.414	1.13363	0.915533
			64.629	3.713	1.48374	0.995716
			64.79	3.765	1.48743	1.00966
			59.689	3.967	1.37032	1.06383
			51.658	3.956	1.18595	1.06088
			59.222	3.816	1.3596	1.02334
			49.418	3.725	1.13453	0.998934
			59.124	4.161	1.35735	1.11586
			63.271	4.008	1.45256	1.07483
			54.776	3.433	1.25753	0.920629
			0.786	2.246	0.0180448	0.602311
			75.899	4.137	1.74247	1.10942
			69.504	4.016	1.59565	1.07697
			63.929	4.393	1.46767	1.17807
			62.133	3.392	1.42643	0.909634
			58.144	3.476	1.33485	0.93216
			60.477	4.146	1.38842	1.11183
			57.419	4.035	1.31821	1.08207
			65.722	3.506	1.50883	0.940205
			60.899	3.402	1.3981	0.912315
			52.896	3.348	1.21437	0.897834
			51.753	3.25	1.18813	0.871553
			64.327	4.525	1.4768	1.21347
			55.896	3.138	1.28325	0.841518
			74.824	4.583	1.71779	1.22902
			64.871	3.778	1.48929	1.01315
			60.635	4.215	1.39204	1.13034
			68.328	4.052	1.56866	1.08663
			62.971	3.741	1.44567	1.00323
			54.527	3.468	1.25182	0.930015
			64.894	4.014	1.48982	1.07644
			74.851	4.143	1.71841	1.11103
			60.862	4.247	1.39725	1.13892
			63.419	4.03	1.45596	1.08073
			63.898	3.197	1.46695	0.85734
			49.813	2.846	1.14359	0.763213
			65.304	3.896	1.49923	1.04479
			46.366	2.905	1.06446	0.779035
			61.82	3.644	1.41925	0.977213
			54.992	3.496	1.26249	0.937523
			50.131	3.909	1.15089	1.04828
			46.784	3.382	1.07405	0.906952
			35.944	4.402	0.825193	1.18049
			39.377	4.12	0.904007	1.10486
			37.199	4.202	0.854005	1.12685
			17.453	4.729	0.400681	1.26818
			36.623	3.519	0.840781	0.943691
			38.664	4.523	0.887638	1.21293
			37.997	4.207	0.872325	1.12819
			23.693	4.399	0.543938	1.17968
			39.723	4.536	0.91195	1.21642
			38.262	4.376	0.878409	1.17351
			47.59	4.193	1.09256	1.12444
			32.489	4.047	0.745874	1.08529
			51.951	4.146	1.19268	1.11183
			62.149	3.925	1.4268	1.05257
			0.237	2.956	0.00544098	0.792711
			36.197	4.299	0.831001	1.15286
			25.673	4.543	0.589394	1.2183
			39.562	3.949	0.908254	1.059
			44.138	4.291	1.01331	1.15072
			35.123	3.974	0.806345	1.06571
			32.854	3.991	0.754254	1.07027
			15.403	17.219	0.353618	4.61762
			22.683	4.671	0.52075	1.25262
			41.088	4.742	0.943288	1.27166
			38.96	4.247	0.894433	1.13892
			16.25	4.351	0.373063	1.16681
			35.02	4.254	0.80398	1.1408
			15.351	18.659	0.352424	5.00379
			40.748	4.775	0.935482	1.28051
			33.899	4.271	0.778244	1.14536
			32.363	3.735	0.742981	1.00162
			30.631	3.574	0.703218	0.958441
			35.593	3.589	0.817135	0.962463
			36.504	4.561	0.838049	1.22312
			37.576	3.996	0.86266	1.07161
			45.524	4.324	1.04513	1.15957
			34.707	4.399	0.796794	1.17968
			37.883	3.504	0.869708	0.939669
			35.942	4.097	0.825147	1.09869
			29.103	3.066	0.668139	0.82221
			25.773	3.125	0.59169	0.838032
			38.551	3.084	0.885044	0.827037
			31.017	4.189	0.71208	1.12337
			35.471	2.742	0.814334	0.735323
			31.382	2.717	0.72046	0.728619
			41.826	4.41	0.96023	1.18263
			18.994	3.133	0.436059	0.840178
			35.213	4.075	0.808411	1.09279
			31.541	3.142	0.72411	0.842591
			26.729	3.901	0.613637	1.04613
			29.759	2.828	0.683199	0.758386
			31.438	3.062	0.721745	0.821137
			36.009	4.011	0.826685	1.07563
			0.311	2.948	0.00713986	0.790566
			21.471	2.84	0.492926	0.761604
			33.326	3.159	0.76509	0.84715
			27.417	2.963	0.629432	0.794589
			26.729	2.92	0.613637	0.783057
			34.882	3.59	0.800812	0.962731
			28.82	2.356	0.661642	0.631809
			26.712	2.739	0.613247	0.734518
			35.36	3.038	0.811786	0.814701
			39.101	4.538	0.897671	1.21696
			31.125	3.472	0.71456	0.931087
			31.737	3.866	0.72861	1.03675
			23.598	4.261	0.541757	1.14267
			33.652	4.251	0.772574	1.13999
			0.296	5.16	0.00679549	1.38376
[truncated: 17 more columns]

## Sheet: F1FS3C
QPCR analysis of endoderm and pluripotency markers in Rset-ACL treated with ACL for 1 month
Units = relative increase (=POWER(2,ΔΔCt)
			SOX17						GATA6						EOMES						SOX2						POU5F1						NANOG
			D0	D30					D0	D30					D0	D30					D0	D30					D0	D30					D0	D30
		Exp 1	1	23.6148				Exp 1	1	12.2981				Exp 1	1	26.4655				Exp 1	1	0.322781				Exp 1	1	0.1141				Exp 1	1	0.135154
			0.469531	26.2848					0.495269	17.0977					0.512654	37.0714					0.877013	0.43728					0.274638	0.143128					0.50839	0.186221
		Exp 2	1	71.6674				Exp 2	1	16.9016				Exp 2	1	65.8729				Exp 2	1	0.612635				Exp 2	1	3.40502				Exp 2	1	2.59647
			2.23749	71.7826					0.324893	15.1166					2.14715	63.7198					1.36541	0.595762					7.73676	3.26858					1.53984	2.36214
		Number of values	4	4				Number of values	4	4				Number of values	4	4				Number of values	4	4				Number of values	4	4				Number of values	4	4
		Minimum	0.4695	23.61				Minimum	0.3249	12.3				Minimum	0.5127	26.47				Minimum	0.877	0.3228				Minimum	0.2746	0.1141				Minimum	0.5084	0.1352
		25% Percentile	0.6021	24.28				25% Percentile	0.3675	13				25% Percentile	0.6345	29.12				25% Percentile	0.9078	0.3514				25% Percentile	0.456	0.1214				25% Percentile	0.6313	0.1479
		Median	1	48.98				Median	0.7476	16.01				Median	1	50.4				Median	1	0.5165				Median	1	1.706				Median	1	1.274
		75% Percentile	1.928	71.75				75% Percentile	1	17.05				75% Percentile	1.86	65.33				75% Percentile	1.274	0.6084				75% Percentile	6.053	3.371				75% Percentile	1.405	2.538
		Maximum	2.237	71.78				Maximum	1	17.1				Maximum	2.147	65.87				Maximum	1.365	0.6126				Maximum	7.737	3.405				Maximum	1.54	2.596
		Mean	1.177	48.34				Mean	0.705	15.35				Mean	1.165	48.28				Mean	1.061	0.4921				Mean	2.503	1.733				Mean	1.012	1.32
		Std. Deviation	0.7501	27.03				Std. Deviation	0.3476	2.223				Std. Deviation	0.6939	19.57				Std. Deviation	0.2113	0.1378				Std. Deviation	3.506	1.853				Std. Deviation	0.4213	1.342
		Std. Error of Mean	0.375	13.51				Std. Error of Mean	0.1738	1.112				Std. Error of Mean	0.347	9.787				Std. Error of Mean	0.1057	0.06889				Std. Error of Mean	1.753	0.9266				Std. Error of Mean	0.2107	0.6711
		Lower 95% CI of mean	-0.01677	5.33				Lower 95% CI of mean	0.1519	11.82				Lower 95% CI of mean	0.06075	17.14				Lower 95% CI of mean	0.7244	0.2729				Lower 95% CI of mean	-3.076	-1.216				Lower 95% CI of mean	0.3416	-0.8158
		Upper 95% CI of mean	2.37	91.34				Upper 95% CI of mean	1.258	18.89				Upper 95% CI of mean	2.269	79.43				Upper 95% CI of mean	1.397	0.7114				Upper 95% CI of mean	8.082	4.681				Upper 95% CI of mean	1.682	3.456
		Sum	4.707	193.3				Sum	2.82	61.41				Sum	4.66	193.1				Sum	4.242	1.968				Sum	10.01	6.931				Sum	4.048	5.28
		Column B	D30					Column B	D30					column A	D30					Column B	D30					Column B	D30
		vs.	vs.					vs.	vs.					vs.	vs.					vs.	vs.					vs.	vs.					Column B	D30
		Column A	D0					Column A	D0					Column A	D0					Column A	D0					Column A	D0					vs.	vs.
																																Column A	D0
		Mann Whitney test						Mann Whitney test						Mann Whitney test						Mann Whitney test						Mann Whitney test
		P value	0.0286					P value	0.0286					P value	0.0286					P value	0.0286					P value	0.6286					Mann Whitney test
		Exact or approximate P value?	Exact					Exact or approximate P value?	Exact					Exact or approximate P value?	Exact					Exact or approximate P value?	Exact					Exact or approximate P value?	Exact					P value	>0.9999
		P value summary	*					P value summary	*					P value summary	*					P value summary	*					P value summary	ns					Exact or approximate P value?	Exact
		Significantly different (P < 0.05)?	Yes					Significantly different (P < 0.05)?	Yes					Significantly different (P < 0.05)?	Yes					Significantly different (P < 0.05)?	Yes					Significantly different (P < 0.05)?	No					P value summary	ns
		One- or two-tailed P value?	Two-tailed					One- or two-tailed P value?	Two-tailed					One- or two-tailed P value?	Two-tailed					One- or two-tailed P value?	Two-tailed					One- or two-tailed P value?	Two-tailed					Significantly different (P < 0.05)?	No
		Sum of ranks in column A,B	10 , 26					Sum of ranks in column A,B	10 , 26					Sum of ranks in column A,B	10 , 26					Sum of ranks in column A,B	26 , 10					Sum of ranks in column A,B	20 , 16					One- or two-tailed P value?	Two-tailed
		Mann-Whitney U	0					Mann-Whitney U	0					Mann-Whitney U	0					Mann-Whitney U	0					Mann-Whitney U	6					Sum of ranks in column A,B	18 , 18
																																Mann-Whitney U	8
		Difference between medians						Difference between medians						Difference between medians						Difference between medians						Difference between medians
		Median of column A	1, n=4					Median of column A	0.7476, n=4					Median of column A	1, n=4					Median of column A	1, n=4					Median of column A	1, n=4					Difference between medians
		Median of column B	48.98, n=4					Median of column B	16.01, n=4					Median of column B	50.4, n=4					Median of column B	0.5165, n=4					Median of column B	1.706, n=4					Median of column A	1, n=4
		Difference: Actual	47.98					Difference: Actual	15.26					Difference: Actual	49.4					Difference: Actual	-0.4835					Difference: Actual	0.7059					Median of column B	1.274, n=4
		Difference: Hodges-Lehmann	47.62					Difference: Hodges-Lehmann	15.35					Difference: Hodges-Lehmann	49.07					Difference: Hodges-Lehmann	-0.5585					Difference: Hodges-Lehmann	-0.5087					Difference: Actual	0.2742
																																Difference: Hodges-Lehmann	0.2501
