# Supplementary material for: An in vitro stem cell model of human epiblast and yolk sac interaction
Source: eLife. 2021 Aug 17;10:e63930. doi: 10.7554/eLife.63930 (PMC8370770; doi:10.7554/eLife.63930)
Supplement: Figure 1—figure supplement 4—source data 1. [file elife-63930-fig1-figsupp4-data1.xlsx]

## Sheet: F1FS4B,C
Flourescence intensity analysis of SOX2 and GATA6 in SHEF6 hEPSCs treated with ACL for 6 days using Fiji
Units =arbitrary units (a.u.)
	Exp 1								Exp 1								Exp 2							Exp 2								Exp 3							Exp 3
	Control	Average flourescence intensity (A.U.)	34.7264	4.88416	1	1			ACL	Average flourescence intensity (A.U.)	3.62384	35.5887	0.104354	7.28655			Control	Average flourescence intensity (A.U.)	32.8005	6.57468	1	1		ACL	Average flourescence intensity (A.U.)	3.61888	41.5551	0.11033	6.32047			Control	Average flourescence intensity (A.U.)	17.0637	2.22995	1	1		ACL	Average flourescence intensity (A.U.)	3.62391	46.4392	0.212375	20.8253				SOX2
			SOX2	GATA6	rel SOX2	rel GATA6					SOX2	GATA6	rel SOX2	rel GATA6					SOX2	GATA6	rel SOX2	rel GATA6				SOX2	GATA6	rel SOX2	rel GATA6					SOX2	GATA6	rel SOX2	rel GATA6				SOX2	GATA6	rel SOX2	rel GATA6					hEPSC
			61.864	5.966	1.78147	1.2215					2.312	26.862	0.0665775	5.49982					0.994	4.368	0.0303044	0.664367				3.298	75.102	0.100547	11.4229					28.476	2.474	1.66881	1.10944				2.816	37.733	0.165029	16.921				Number of values	3865
			44.669	5.545	1.28631	1.1353					3.842	48.54	0.110636	9.93824					52.706	6.204	1.60686	0.94362				2.091	33.289	0.0637489	5.06321					16.81	1.141	0.985134	0.511671				3.118	44.498	0.182727	19.9547
			49.241	5.273	1.41797	1.07961					1.895	45.848	0.0545694	9.38707					56.193	5.235	1.71317	0.796237				3.147	63.361	0.0959435	9.63712					25.168	2.362	1.47495	1.05922				3.023	36.399	0.17716	16.3228				Minimum	0.007744
			63.338	5.663	1.82391	1.15946					2.995	30.202	0.0862455	6.18366					36.187	6.486	1.10324	0.986512				6.814	36.985	0.20774	5.62537					27.239	1.98	1.59632	0.887914				2.552	62.307	0.149558	27.941				25% Percentile	0.6334
			45.893	5.559	1.32156	1.13817					2.858	29.069	0.0823004	5.95168					11.543	4.805	0.351915	0.730834				0.865	5.623	0.0263715	0.855251					16.385	1.258	0.960227	0.564139				2.332	44.071	0.136665	19.7633				Median	0.9693
			9.277	5.39	0.267145	1.10357					2.594	22.29	0.0746981	4.56373					41.766	4.855	1.27333	0.738439				1.073	6.455	0.0327129	0.981797					23.851	2.352	1.39776	1.05473				2.385	60.08	0.139771	26.9423				75% Percentile	1.352
			26.371	5.411	0.759393	1.10787					3.814	45.546	0.10983	9.32524					46.803	4.718	1.4269	0.717602				3.973	45.192	0.121126	6.87364					27.837	2.397	1.63136	1.07491				3.269	40.43	0.191577	18.1305				Maximum	3.279
			37.502	5.446	1.07993	1.11503					2.357	46.965	0.0678734	9.61577					40.686	5.567	1.24041	0.846733				1.288	6.773	0.0392676	1.03016					14.052	1.002	0.823504	0.449338				2.055	36.223	0.120431	16.2439
			39.346	4.922	1.13303	1.00775					1.638	37.652	0.0471687	7.709					34.741	9.128	1.05916	1.38836				2.46	53.874	0.0749987	8.19416					22.693	1.73	1.3299	0.775803				1.969	63.51	0.115391	28.4805				Mean	1.001
			62.616	5.786	1.80312	1.18465					2.204	19.961	0.0634675	4.08688					52.817	5.439	1.61025	0.827265				4.417	48.953	0.134662	7.44569					4.471	0.614	0.262019	0.275343				2.331	6.349	0.136606	2.84715				Std. Deviation	0.5834
			41.832	5.364	1.20462	1.09824					3.453	29.124	0.0994343	5.96295					45.654	4.346	1.39187	0.661021				0.672	5.629	0.0204875	0.856163					23.994	2.414	1.40615	1.08254				2.747	32.043	0.160985	14.3694				Std. Error of Mean	0.009385
			33.827	5.65	0.974099	1.1568					5.493	15.613	0.158179	3.19666					39.804	3.759	1.21352	0.571739				3.961	45.941	0.12076	6.98756					14.187	1.189	0.831415	0.533197				31.55	6.664	1.84896	2.98841
			36.708	4.942	1.05706	1.01184					1.635	37.245	0.0470823	7.62567					62.923	5.695	1.91835	0.866202				3.956	45.46	0.120608	6.91441					28.189	2.527	1.65199	1.13321				1.649	53.473	0.0966381	23.9795				Lower 95% CI of mean	0.9823
			28.728	5.724	0.827266	1.17195					0.715	31.997	0.0205895	6.55117					53.2	3.697	1.62192	0.562309				1.783	20.643	0.0543588	3.13977					22.312	2.366	1.30757	1.06101				1.588	18.701	0.0930632	8.3863				Upper 95% CI of mean	1.019
			31.379	5.1	0.903605	1.04419					0.661	38.139	0.0190345	7.80871					45.143	4.976	1.37629	0.756843				28.262	52.849	0.861632	8.03826					20.569	2.047	1.20543	0.917959				2.397	49.438	0.140474	22.17
			39.743	5.303	1.14446	1.08575					0.624	32.066	0.017969	6.5653					50.277	5.257	1.53281	0.799583				15.005	42.613	0.457462	6.48138					24.565	2.198	1.43961	0.985674				0.874	2.157	0.0512199	0.967288				Sum	3868
			34.79	5.448	1.00183	1.11544					1.487	38.511	0.0428204	7.88487					39.538	3.518	1.20541	0.535083				2.096	40.123	0.0639014	6.10265					18.827	1.828	1.10334	0.819751				1.699	50.708	0.0995683	22.7396
			39.63	5.063	1.14121	1.03662					3.131	27.428	0.0901618	5.6157					63.861	5.687	1.94695	0.864985				1.757	12.939	0.0535662	1.968					3.685	2.261	0.215956	1.01393				39.449	7.188	2.31187	3.2234				D'Agostino & Pearson normality test
			64.901	5.625	1.86892	1.15168					2.177	28.933	0.06269	5.92384					45.87	4.245	1.39845	0.645659				0.898	8.88	0.0273776	1.35064					21.791	1.927	1.27704	0.864146				0.578	5.19	0.0338731	2.32741				K2	112.8
			67.126	7.005	1.93299	1.43423					2.631	60.475	0.0757636	12.3819					38.656	3.292	1.17852	0.500709				1.41	13.677	0.0429871	2.08025					28.21	2.029	1.65322	0.909887				2.173	17.467	0.127347	7.83292				P value	<0.0001
			51.449	4.859	1.48155	0.994848					2.718	37.425	0.0782689	7.66252					42.286	3.487	1.28919	0.530368				0.75	7.211	0.0228655	1.09678					26.059	2.134	1.52716	0.956974				2.317	14.854	0.135786	6.66115				Passed normality test (alpha=0.05)?	No
			36.804	4.573	1.05983	0.936291					2.425	36.554	0.0698315	7.48419					42.745	2.641	1.30318	0.401693				2.402	72.303	0.0732305	10.9972					19.526	2.049	1.1443	0.918856				2.129	34.012	0.124768	15.2524				P value summary	****
			49.094	5.13	1.41374	1.05033					2.013	35.297	0.0579674	7.22683					40.176	4.2	1.22486	0.638814				1.777	39.39	0.0541759	5.99117					19.9	1.938	1.16622	0.869079				28.182	6.891	1.65158	3.09021
			48.654	5.811	1.40106	1.18976					0.631	24.965	0.0181706	5.11142					39.853	2.436	1.21501	0.370512				2.551	47.766	0.0777731	7.26514					23.613	1.815	1.38382	0.813921				2.485	37.81	0.145631	16.9556
			61.333	6.844	1.76618	1.40126					2.232	39.782	0.0642738	8.1451					1.741	3.608	0.0530784	0.548772				2.317	41.436	0.0706391	6.30236					18.432	1.925	1.08019	0.863249				2.616	42.352	0.153308	18.9924
			40.21	4.966	1.15791	1.01676					5.265	40.159	0.151614	8.22229					41.664	7.158	1.27022	1.08872				1.526	17.18	0.0465236	2.61306					19.16	1.634	1.12285	0.732753				1.918	42.201	0.112403	18.9247				Column B	hEPSC-ACL
			0.995	4.146	0.0286525	0.848866					0.723	25.251	0.0208199	5.16997					39.354	2.232	1.1998	0.339484				2.965	53.576	0.0903948	8.14884					22.883	1.635	1.34104	0.733201				2.796	54.122	0.163857	24.2705				vs.	vs.
			48.41	5.021	1.39404	1.02802					0.65	26.623	0.0187177	5.45088					31.3	6.611	0.954252	1.00552				3.642	47.325	0.111035	7.19807					17.982	1.381	1.05382	0.619297				36.045	7.042	2.11238	3.15792				Column A	hEPSC
			45.557	5.213	1.31188	1.06733					1.799	34.843	0.0518049	7.13387					42.298	4.89	1.28955	0.743762				1.862	26.961	0.0567673	4.10073					24.08	2.161	1.41119	0.969082				1.652	39.685	0.0968139	17.7964
			35.126	5.295	1.01151	1.08412					2.926	48.331	0.0842586	9.89545					35.291	2.125	1.07593	0.32321				3.659	46.16	0.111553	7.02087					20.424	2.119	1.19693	0.950247				0.738	6.938	0.0432498	3.11129				Mann Whitney test
			44.724	5.256	1.28789	1.07613					1.93	24.875	0.0555772	5.09299					42.326	2.55	1.29041	0.387852				2.707	44.948	0.0825291	6.83653					17.235	1.346	1.01004	0.603602				23.294	30.369	1.36512	13.6187				P value	<0.0001
			34.777	6.416	1.00146	1.31363					4.705	21.562	0.135488	4.41468					34.605	2.819	1.05501	0.428766				1.591	30.378	0.0485053	4.62045					16.4	1.347	0.961106	0.60405				1.937	39.573	0.113516	17.7462				Exact or approximate P value?	Approximate
			36.817	4.933	1.0602	1.01					2.429	17.75	0.0699467	3.63419					36.057	4.999	1.09928	0.760341				3.062	25.524	0.0933521	3.88217					23.929	2.051	1.40234	0.919753				2.03	41.689	0.118966	18.6951				P value summary	****
			54.989	5.225	1.58349	1.06978					2.563	31.7	0.0738054	6.49036					36.847	3.723	1.12337	0.566263				2.77	47.613	0.0844498	7.24187					21.621	2.062	1.26708	0.924686				2.062	50.513	0.120842	22.6521				Significantly different (P < 0.05)?	Yes
			29.122	5.536	0.838612	1.13346					2.449	17.47	0.0705226	3.57687					35.776	7.214	1.09071	1.09724				2.445	46.924	0.0745414	7.13708					14.936	1.26	0.87531	0.565036				3.176	36.712	0.186126	16.4632				One- or two-tailed P value?	Two-tailed
			31.171	5.037	0.897616	1.03129					3.63	29.156	0.104531	5.9695					39.631	3.159	1.20824	0.48048				1.106	9.16	0.0337189	1.39322					23.09	1.909	1.35317	0.856074				1.979	30.471	0.115977	13.6645				Sum of ranks in column A,B	15976650 , 3991391
			40.938	5.66	1.17887	1.15885					1.762	41.365	0.0507394	8.46921					37.596	4.453	1.1462	0.677295				9.453	22.297	0.288196	3.39134					16.811	1.29	0.985192	0.578489				1.485	30.456	0.087027	13.6577				Mann-Whitney U	979106
			40.509	5.187	1.16652	1.062					3.48	30.511	0.100212	6.24692					38.197	1.803	1.16452	0.274234				11.3	26.754	0.344506	4.06925					10.832	2.006	0.634799	0.899573				1.587	23.964	0.0930046	10.7464
			48.143	6.219	1.38635	1.2733					2.319	27.722	0.0667791	5.6759					39.337	6.536	1.19928	0.994117				11.098	25.133	0.338348	3.8227					25.158	2.279	1.47436	1.022				2.623	53.146	0.153718	23.8329				Difference between medians
			47.749	6.318	1.375	1.29357					2.303	23.936	0.0663183	4.90074					36.159	1.866	1.10239	0.283816				2.07	50.54	0.0631087	7.68707					22.205	1.832	1.3013	0.821544				21.366	28.881	1.25213	12.9514				Median of column A	0.9693, n=3865
			30.55	5.124	0.879733	1.0491					2.342	32.22	0.0674414	6.59683					45.953	4.681	1.40098	0.711974				11.193	24.897	0.341244	3.7868					19.358	1.926	1.13446	0.863698				1.382	14.627	0.0809908	6.55935				Median of column B	0.09148, n=2454
			36.977	6.148	1.06481	1.25876					3.979	33.257	0.114581	6.80915					38.506	7.202	1.17394	1.09541				12.101	26.504	0.368927	4.03122					14.423	1.166	0.845246	0.522882				1.63	25.057	0.0955246	11.2366				Difference: Actual	-0.8778
			64.737	6.749	1.8642	1.38181					2.205	20.649	0.0634963	4.22775					40.297	2.031	1.22855	0.308912				0.838	9.551	0.0255484	1.45269					23.099	1.776	1.35369	0.796432				1.832	24.839	0.107363	11.1388				Difference: Hodges-Lehmann	-0.8445
			27.869	4.893	0.80253	1.00181					2.84	28.051	0.0817821	5.74326					39.051	2.102	1.19056	0.319711				0.94	10.349	0.0286581	1.57407					18.251	1.999	1.06958	0.896434				2.556	44.098	0.149792	19.7754
			73.325	6.38	2.1115	1.30626					2.592	33.475	0.0746405	6.85378					38.133	3.155	1.16257	0.479871				4.902	42.307	0.149449	6.43484					16.66	1.281	0.976343	0.574453				1.624	28.763	0.095173	12.8985
			55.562	5.578	1.59999	1.14206					2.074	21.829	0.0597239	4.46934					47.014	4.518	1.43333	0.687182				2.206	56.226	0.067255	8.5519					15.728	1.221	0.921724	0.547547				2.609	27.628	0.152898	12.3895
			0.479	4.112	0.0137935	0.841905					2.203	31.274	0.0634387	6.40314					55.968	5.599	1.70631	0.8516				14.944	45.698	0.455602	6.9506					15.489	1.314	0.907718	0.589252				2.692	50.722	0.157762	22.7458
			13.821	4.972	0.397996	1.01798					2.245	40.026	0.0646481	8.19506					35.028	5.323	1.06791	0.809621				0.792	6.78	0.0241459	1.03123					22.927	1.944	1.34361	0.87177				2.532	41.099	0.148385	18.4305
			39.887	6.675	1.14861	1.36666					2.235	38.208	0.0643602	7.82283					35.094	1.713	1.06992	0.260545				3.714	26.013	0.11323	3.95654					12.569	1.019	0.736594	0.456962				1.595	13.37	0.0934734	5.99566
			36.705	6.141	1.05698	1.25733					2.481	24.264	0.0714441	4.96789					23.932	3.538	0.729622	0.538125				2.397	71.804	0.073078	10.9213					16.774	1.262	0.983024	0.565933				1.579	12.792	0.0925358	5.73646
			32.7	6.202	0.941646	1.26982					2.589	24.953	0.0745541	5.10896					39.786	1.919	1.21297	0.291877				1.081	5.763	0.0329568	0.876545					17.115	1.823	1.00301	0.817508				2.395	29.922	0.140357	13.4183
			21.619	7.312	0.622552	1.49708					1.904	28.298	0.0548285	5.79383					52.343	1.949	1.5958	0.29644				2.912	63.716	0.088779	9.69112					22.234	1.612	1.303	0.722887				2.605	40.254	0.152664	18.0516
			36.491	5.224	1.05081	1.06958					2.588	45.772	0.0745253	9.37151					32.466	1.537	0.989801	0.233776				4.62	47.122	0.140851	7.16719					15.892	1.068	0.931335	0.478935				1.694	27.077	0.0992752	12.1424
			45	5.965	1.29584	1.22129					2.581	34.402	0.0743238	7.04358					32.832	3.074	1.00096	0.467551				1.007	9.213	0.0307007	1.40129					13.777	1.24	0.807388	0.556067				1.676	15.355	0.0982204	6.88582
			75.093	7.201	2.16242	1.47436					2.542	48.371	0.0732007	9.90364					36.277	6.909	1.10599	1.05085				1.458	9.681	0.0444505	1.47247					17.623	1.735	1.03278	0.778046				1.808	25.874	0.105956	11.603
			33.145	5.349	0.95446	1.09517					2.569	33.581	0.0739782	6.87549					44.367	2.874	1.35263	0.437132				1.546	11.163	0.0471334	1.69788					18.517	1.752	1.08517	0.785669				2.028	54.515	0.118849	24.4468
			37.54	6.785	1.08102	1.38918					0.785	9.213	0.0226053	1.8863					24.169	5.346	0.736847	0.813119				0.867	8.759	0.0264325	1.33223					12.109	1.067	0.709636	0.478487				2.521	38.585	0.147741	17.3031
			81.871	7.211	2.3576	1.4764					2.816	37.735	0.0810909	7.72599					31.559	1.325	0.962149	0.201531				0.688	6.931	0.0209753	1.0542					20.223	1.918	1.18515	0.86011				1.919	23.498	0.112461	10.5375
			15.336	6.617	0.441623	1.35479					2.553	52.052	0.0735175	10.6573					37.071	4.504	1.13019	0.685052				2.361	8.596	0.0719805	1.30744					17.759	1.218	1.04075	0.546201				1.806	18.808	0.105839	8.43428
			98.888	6.689	2.84763	1.36953					2.69	32.542	0.0774626	6.66276					24.365	1.666	0.742823	0.253396				3.188	74.219	0.0971935	11.2886					19.091	1.953	1.11881	0.875806				1.538	17.906	0.090133	8.02979
			39.75	6.479	1.14466	1.32653					2.247	42.084	0.0647057	8.61642					40.699	1.684	1.2408	0.256134				3.105	34.391	0.094663	5.23083					24.178	1.326	1.41693	0.594633				0.447	2.864	0.026196	1.28434
			45.964	5.54	1.3236	1.13428					2.303	31.77	0.0663183	6.5047					45.581	4.114	1.38964	0.625734				0.827	2.884	0.025213	0.438653					17.54	1.218	1.02791	0.546201				2.905	48.888	0.170245	21.9234
			62.173	6.074	1.79036	1.24361					2.742	29.502	0.07896	6.04034					39.795	2.712	1.21324	0.412492				6.47	33.458	0.197253	5.08892					17.944	1.862	1.05159	0.834998				2.08	19.344	0.121896	8.67465
			13.918	6.998	0.40079	1.43279					2.066	37.154	0.0594936	7.60703					32.609	1.483	0.99416	0.225562				2.342	57.463	0.0714012	8.74005					18.566	1.158	1.08804	0.519295				1.938	43.15	0.113575	19.3502
			9.888	6.69	0.28474	1.36973					2.244	48.797	0.0646193	9.99086					40.915	7.183	1.24739	1.09252				25.605	9.44	0.780627	1.43581					4.465	2.057	0.261667	0.922444				2.336	25.663	0.136899	11.5083
			0.71	7.245	0.0204455	1.48337					2.652	28.847	0.0763683	5.90623					48.079	5.444	1.4658	0.828025				0.941	4.173	0.0286885	0.634708					16.984	1.448	0.995331	0.649343				1.931	26.153	0.113164	11.7281
			13.582	6.78	0.391114	1.38816					2.243	35.206	0.0645905	7.20819					32.529	2.026	0.991721	0.308152				0.666	0.937	0.0203045	0.142516					14.919	1.323	0.874314	0.593288				2.442	23.712	0.143111	10.6334
			0.619	4.927	0.017825	1.00877					2.072	39.685	0.0596663	8.12524					36.697	3.987	1.11879	0.606417				1.078	10.514	0.0328653	1.59917					24.518	2.202	1.43685	0.987468				2.83	49.959	0.165849	22.4037
			0.753	7.877	0.0216838	1.61276					1.907	48.543	0.0549149	9.93886					29.761	3.155	0.907332	0.479871				0.655	1.487	0.0199692	0.226171					13.772	1.294	0.807095	0.580283				2.288	25.816	0.134086	11.577
			6.986	2.931	0.201172	0.600103					1.641	28.688	0.0472551	5.87368					30.206	1.234	0.920899	0.18769				2.707	61.556	0.0825291	9.36259					5.666	15.222	0.33205	6.82617				1.815	27.949	0.106366	12.5335
			57.831	6.505	1.66533	1.33186					1.868	27.663	0.0537919	5.66382					27.008	1.781	0.823401	0.270888				6.94	34.04	0.211582	5.17744					19.171	1.74	1.1235	0.780288				1.761	52.62	0.103202	23.597
			3.229	2.444	0.0929839	0.500393					2.547	36.482	0.0733447	7.46945					31.371	4.438	0.956417	0.675014				25.329	9.914	0.772213	1.50791					19.157	2.625	1.12268	1.17716				2.197	20.141	0.128753	9.03205
			0.815	4.308	0.0234691	0.882034					3.341	46.033	0.0962091	9.42495					34.977	1.967	1.06635	0.299178				25.268	10.339	0.770353	1.57255					16.714	1.607	0.979508	0.720645				2.453	27.105	0.143756	12.155
			28.847	5.78	0.830693	1.18342					5.825	5.177	0.16774	1.05996					40.869	4.917	1.24599	0.747869				1.012	6.692	0.0308531	1.01784					23.193	1.632	1.3592	0.731856				1.707	25.664	0.100037	11.5088
			10.912	5.737	0.314227	1.17461					3.408	49.327	0.0981385	10.0994					47.19	5.727	1.4387	0.871069				26.223	10.427	0.799468	1.58593					19.039	1.989	1.11576	0.89195				2.507	32.447	0.14692	14.5506
			3.352	5.804	0.0965259	1.18833					2.452	38.046	0.070609	7.78967					62.187	2.856	1.89591	0.434394				5.125	65.334	0.156247	9.93721					24.023	2.449	1.40784	1.09823				2.166	29.869	0.126936	13.3945
			27.705	5.739	0.797807	1.17502					2.88	33.496	0.0829339	6.85808					15.485	3.489	0.472096	0.530672				1.096	7.755	0.0334141	1.17953					13.723	1.712	0.804223	0.767731				1.772	40.768	0.103846	18.2821
			17.29	2.909	0.497891	0.595598					2.234	36.83	0.0643314	7.5407					47.699	3.902	1.45421	0.593489				17.71	31.158	0.53993	4.73909					32.974	2.228	1.93241	0.999127				2.837	45.032	0.16626	20.1942
			31.561	4.792	0.908846	0.98113					0.518	4.572	0.0149166	0.936087					33.238	1.395	1.01334	0.212178				2.283	11.095	0.0696025	1.68753					14.362	2.002	0.841671	0.897779				2.752	42.977	0.161278	19.2727
			45.687	6.47	1.31563	1.32469					2.37	47.273	0.0682477	9.67883					36.804	1.394	1.12205	0.212026				3.186	35.382	0.0971325	5.38156					12.759	1.886	0.747729	0.84576				1.526	45.296	0.0894298	20.3126
			32.045	4.625	0.922784	0.946938					2.45	38.795	0.0705514	7.94302					27.089	1.532	0.82587	0.233015				5.56	71.45	0.169509	10.8674					23.766	2.551	1.39278	1.14397				1.982	52.293	0.116153	23.4503
			33.398	5.784	0.961746	1.18424					2.869	34.476	0.0826172	7.05873					33.949	3.971	1.03501	0.603984				1.968	23.921	0.059999	3.63835					0.717	0.543	0.0420191	0.243504				1.601	28.496	0.0938251	12.7788
			36.949	4.618	1.064	0.945505					2.976	43.808	0.0856984	8.9694					35.478	6.582	1.08163	1.00111				1.592	23.03	0.0485358	3.50283					12.881	1.749	0.754879	0.784324				2.517	22.504	0.147506	10.0917
			31.412	4.768	0.904556	0.976216					2.539	39.893	0.0731143	8.16783					18.966	9.059	0.578222	1.37786				2.701	52.544	0.0823462	7.99187					14.045	1.875	0.823094	0.840827				2.118	43.813	0.124123	19.6476
			55.29	6.603	1.59216	1.35192					2.419	46.436	0.0696587	9.50746					29.349	1.307	0.894772	0.198793				2.842	65.934	0.0866449	10.0285					11.428	1.826	0.669727	0.818854				2.038	41.876	0.119435	18.7789
			37.687	4.403	1.08525	0.901485					1.588	55.33	0.0457288	11.3285					39.504	1.657	1.20437	0.252027				19.611	9.541	0.597886	1.45117					24.14	2.557	1.4147	1.14666				2.092	50.471	0.1226	22.6333
			36.608	4.13	1.05418	0.84559					1.986	27.722	0.0571898	5.6759					30.707	3.542	0.936173	0.538733				2.709	46.454	0.0825901	7.06559					11.688	2.238	0.684964	1.00361				2.634	51.092	0.154363	22.9118
			28.152	4.441	0.810679	0.909265					2.224	44.249	0.0640434	9.05969					30.671	1.798	0.935076	0.273473				1.613	32.631	0.049176	4.96313					2.25	13.778	0.131859	6.17862				2.359	45.107	0.138247	20.2278
			39.013	6.192	1.12344	1.26777					2.062	24.318	0.0593784	4.97895					30.568	1.749	0.931936	0.266021				3.682	48.733	0.112254	7.41222					10.915	1.764	0.639663	0.79105				2.123	53.797	0.124416	24.1248
			32.652	5.166	0.940263	1.0577					2.214	42.711	0.0637555	8.74479					39.116	6.108	1.19254	0.929019				3.468	50.711	0.10573	7.71308					13.19	1.715	0.772987	0.769077				42.596	6.516	2.4963	2.92204
			7.597	1.337	0.218767	0.273742					2.545	40.023	0.0732871	8.19444					41.584	2.052	1.26778	0.312106				1.839	40.614	0.0560661	6.17734					15.1	2.083	0.884921	0.934103				2.797	69.681	0.163915	31.2478
			0.579	5.199	0.0166732	1.06446					2.301	46.455	0.0662607	9.51135					43.299	5.004	1.32007	0.761102				3.12	38.5	0.0951204	5.8558					24.943	2.286	1.46176	1.02514				2.928	50.817	0.171593	22.7884
			32.2	4.408	0.927247	0.902509					2.077	39.899	0.0598103	8.16906					34.162	1.317	1.04151	0.200314				2.81	35.912	0.0856693	5.46217					10.128	1.81	0.593542	0.811679				2.893	51.397	0.169541	23.0485
			29.079	5.134	0.837373	1.05115					1.97	40.538	0.0567291	8.29989					26.742	1.759	0.815291	0.267542				2.996	60.72	0.0913399	9.23543					14.73	2.683	0.863237	1.20317				3.094	52.348	0.181321	23.475
			43.933	3.971	1.26512	0.813036					2.3	45.97	0.066232	9.41205					31.584	1.918	0.962911	0.291725				1.706	55.382	0.0520113	8.42353					23.144	2.475	1.35633	1.10989				1.157	9.015	0.0678049	4.0427
			36.11	4.031	1.03984	0.82532					2.406	40.067	0.0692844	8.20345					25.949	1.321	0.791115	0.200922				2.733	58.274	0.0833218	8.8634					0.256	1.383	0.0150026	0.620194				1.862	9.176	0.109121	4.1149
			0.561	7.088	0.0161548	1.45122					1.757	39.193	0.0505955	8.02451					17.355	4.226	0.529107	0.642769				3.127	24.166	0.0953338	3.67562					20.213	2.996	1.18456	1.34353				2.796	57.208	0.163857	25.6544
			0.714	4.228	0.0205607	0.865655					3.054	47.133	0.0879445	9.65017					28.122	1.314	0.857364	0.199858				1.618	53.745	0.0493284	8.17454					26.913	2.466	1.57721	1.10586				3.404	32.351	0.199488	14.5075
			36.934	5.446	1.06357	1.11503					2.001	33.661	0.0576218	6.89187					38.162	1.582	1.16346	0.24062				2.933	62.837	0.0894192	9.55742					16.047	2.752	0.940419	1.23411				4.026	40.357	0.23594	18.0977
			44.107	3.995	1.27013	0.81795					2.049	38.356	0.059004	7.85314					34.934	3.34	1.06504	0.50801				2.7	81.319	0.0823157	12.3685					16.09	2.058	0.942939	0.922892				3.964	39.397	0.232306	17.6672
			21.583	4.432	0.621515	0.907423					0.596	3.614	0.0171627	0.739943					29.647	1.611	0.903857	0.245031				5.492	12.012	0.167436	1.82701					0.361	1.051	0.0211561	0.471312				2.86	63.912	0.167608	28.6608
			47.304	3.824	1.36219	0.782939					2.956	55.968	0.0851225	11.4591					52.05	5.504	1.58686	0.837151				3.451	14.782	0.105212	2.24832					0.471	0.548	0.0276025	0.245746				2.311	45.705	0.135434	20.496
			33.041	4.49	0.951465	0.919298					3.048	48.415	0.0877717	9.91265					35.359	1.451	1.078	0.220695				2.74	22.736	0.0835352	3.45812					0.324	1.104	0.0189877	0.495079				4.062	43.705	0.23805	19.5991
			40.153	3.574	1.15627	0.731753					2.652	46.242	0.0763683	9.46774					40.011	2.129	1.21983	0.323818				3.572	24.586	0.108901	3.7395					6.953	2.285	0.407474	1.02469				4.215	43.816	0.247016	19.6489
			56.86	4.176	1.63737	0.855008					1.903	32.931	0.0547997	6.7424					39.485	1.532	1.20379	0.233015				1.047	4.48	0.0319202	0.681402					23.921	2.053	1.40187	0.92065				2.634	37.683	0.154363	16.8986
			52.92	4.082	1.52391	0.835762					2.548	48.382	0.0733735	9.90589					45.541	4.091	1.38842	0.622236				2.977	54.907	0.0907607	8.35128					28.704	2.411	1.68217	1.08119				2.874	47.352	0.168428	21.2346
			48.57	4.792	1.39865	0.98113					1.741	33.873	0.0501347	6.93527					32.117	1.73	0.97916	0.263131				4.263	49.016	0.129967	7.45527					28.177	2.535	1.65129	1.1368				1.849	35.176	0.108359	15.7744
			26.889	4.388	0.774309	0.898414					2.617	54.009	0.0753604	11.058					38.836	4.309	1.184	0.655393				3.252	43.478	0.0991447	6.61295					26.885	2.138	1.57557	0.958767				2.515	50.866	0.147389	22.8104
			41.792	4.216	1.20346	0.863198					1.941	37.472	0.055894	7.67214					59.947	5.36	1.82762	0.815249				2.987	23.425	0.0910655	3.56291					28.773	2.293	1.68621	1.02828				3.405	74.059	0.199547	33.2111
			49.287	3.929	1.41929	0.804437					3.043	51.837	0.0876277	10.6133					35.635	1.689	1.08641	0.256895				1.176	7.361	0.0358531	1.1196					22.163	1.873	1.29884	0.83993				2.772	33.572	0.16245	15.0551
			48.145	4.197	1.38641	0.859308					2.254	23.748	0.0649073	4.86225					36.871	2.193	1.1241	0.333552				2.626	10.132	0.0800596	1.54106					26.954	2.641	1.57961	1.18433				2.373	44.811	0.139067	20.0951
			23.575	4.675	0.678877	0.957175					2.324	38.385	0.0669231	7.85907					35.954	1.411	1.09614	0.214611				3.871	40.846	0.118016	6.21262					21.235	2.181	1.24446	0.97805				2.444	41.918	0.143228	18.7978
			37.961	4.495	1.09314	0.920321					1.854	35.732	0.0533887	7.31589					39.182	2.019	1.19455	0.307087				2.72	71.662	0.0829254	10.8997					24.798	1.975	1.45326	0.885671				3.208	36.533	0.188002	16.3829
			30.394	5.709	0.875241	1.16888					2.356	29.58	0.0678446	6.05631					49.345	3.02	1.5044	0.459338				1.905	4.586	0.0580783	0.697524					24.456	1.883	1.43322	0.844415				2.768	32.418	0.162216	14.5376
			31.703	5.238	0.912935	1.07245					3.408	45.929	0.0981385	9.40366					35.537	2.784	1.08343	0.423443				3.553	20.015	0.108321	3.04425					26.383	1.866	1.54615	0.836791				2.345	39.255	0.137426	17.6036
			48.686	4.478	1.40199	0.916841					2.345	41.281	0.0675278	8.45201					57.504	5.981	1.75314	0.909702				2.324	40.925	0.0708525	6.22464					23.149	1.829	1.35662	0.820199				1.808	20.067	0.105956	8.99887
			53.24	4.544	1.53313	0.930354					1.873	35.721	0.0539358	7.31364					39.128	4.189	1.19291	0.637141				3.095	17.726	0.0943582	2.6961					29.624	2.216	1.73609	0.993746				2.853	62.911	0.167197	28.2119
			29.868	5.041	0.860094	1.03211					0.56	5.773	0.016126	1.18198					35.425	2.671	1.08001	0.406256				9.219	30.352	0.281062	4.6165					27.533	1.794	1.61354	0.804504				4.076	26.038	0.23887	11.6765
			29.808	4.65	0.858366	0.952057					2.181	38.122	0.0628052	7.80523					3.969	4.304	0.121004	0.654633				3.126	26.202	0.0953033	3.98529					26.957	2.096	1.57979	0.939933				3.083	41.926	0.180676	18.8013
			23.748	4.499	0.683859	0.92114					2.023	21.932	0.0582553	4.49043					38.168	2.657	1.16364	0.404126				1.054	7.691	0.0321336	1.16979					24.075	2.048	1.41089	0.918408				4.031	38.58	0.236233	17.3009
			49.712	4.783	1.43153	0.979287					2.564	24.575	0.0738342	5.03157					18.798	3.194	0.5731	0.485803				2.929	76.011	0.0892973	11.5612					25.197	2.226	1.47665	0.99823				4.039	25.136	0.236702	11.272
			20.069	5.14	0.577917	1.05238					2.266	25.311	0.0652529	5.18226					56.02	6.282	1.7079	0.955484				0.926	8.333	0.0282312	1.26744					23.375	2.007	1.36987	0.900022				2.839	23.323	0.166377	10.459
			28.978	4.528	0.834465	0.927078					2.62	38.921	0.0754468	7.96882					42.523	4.186	1.29641	0.636685				4.042	55.772	0.12323	8.48285					23.446	1.667	1.37403	0.747552				2.449	51.564	0.143521	23.1234
			25.679	4.967	0.739465	1.01696					1.807	47.349	0.0520353	9.69439					47.336	4.98	1.44315	0.757451				3.235	58.84	0.0986264	8.94949					27.534	2.483	1.6136	1.11348				2.391	35.269	0.140122	15.8161
			35.635	5.204	1.02616	1.06548					1.967	18.562	0.0566427	3.80045					46.632	4.391	1.42168	0.667865				1.005	7.317	0.0306397	1.11291					27.194	1.881	1.59368	0.843518				2.406	73.196	0.141001	32.8241
			38.12	5.201	1.09772	1.06487					2.345	15.822	0.0675278	3.23945					43.829	3.417	1.33623	0.519721				3.585	56.296	0.109297	8.56255					26.414	2.171	1.54797	0.973566				2.357	47.938	0.13813	21.4974
			20.561	4.253	0.592085	0.870774					1.702	13.068	0.0490116	2.67559					1.159	17.1	0.0353348	2.60089				3.213	55.684	0.0979557	8.46946					28.476	2.564	1.66881	1.1498				2.732	23.169	0.160106	10.3899
			25.834	5.341	0.743929	1.09353					1.904	14.284	0.0548285	2.92455					41.862	4.287	1.27626	0.652047				3.055	45.038	0.0931387	6.85022					20.021	1.764	1.17331	0.79105				2.76	39.474	0.161747	17.7018
			0.776	7.221	0.0223461	1.47845					1.88	19.139	0.0541374	3.91858					1.773	6.598	0.054054	1.00355				1.998	31.336	0.0609136	4.76616					19.653	1.91	1.15175	0.856523				2.976	36.653	0.174406	16.4367
			0.827	3.732	0.0238147	0.764102					2.018	22.389	0.0581113	4.584					1.722	3.059	0.0524991	0.46527				1.802	43.501	0.0549381	6.61644					18.603	1.521	1.09021	0.682079				3.814	44.042	0.223516	19.7502
			7.92	5.289	0.228068	1.08289					1.9	8.82	0.0547134	1.80584					18.953	2.429	0.577826	0.369448				2.465	35.025	0.0751512	5.32726					26.197	2.514	1.53525	1.12738				2.478	37.793	0.145221	16.9479
			2.546	4.833	0.0733159	0.989525					1.67	22.274	0.0480902	4.56045					1.797	4.032	0.0547857	0.613262				2.032	54.439	0.0619502	8.2801					19.382	1.561	1.13586	0.700017				1.837	33.108	0.107656	14.847
			9.486	5.985	0.273164	1.22539					0.796	1.975	0.022922	0.404368					0.749	10.868	0.022835	1.65301				2.583	19.775	0.0787487	3.00775					19.491	1.791	1.14225	0.803158				3.052	64.32	0.17886	28.8437
			0.518	4.066	0.0149166	0.832487					0.528	1.945	0.0152046	0.398226					1.346	4.461	0.0410359	0.678512				2.858	48.216	0.0871327	7.33359					22.774	1.832	1.33465	0.821544				3.034	65.339	0.177805	29.3007
			13.139	5.411	0.378357	1.10787					1.516	17.665	0.0436555	3.61679					53.028	12.753	1.61668	1.93971				1.094	14.893	0.0333531	2.26521					26.232	2.525	1.5373	1.13231				2.016	49.219	0.118146	22.0718
			5.416	5.465	0.155962	1.11892					1.691	17.518	0.0486949	3.58669					6.926	9.826	0.211155	1.49452				2.49	33.897	0.0759134	5.15569					23.316	2.162	1.36641	0.96953				2.57	53.782	0.150612	24.1181
			1.93	5.311	0.0555772	1.08739					3.024	18.933	0.0870806	3.87641					52.938	13.037	1.61394	1.98291				3.036	33.214	0.0925594	5.05181					19.79	1.646	1.15977	0.738134				2.355	35.255	0.138013	15.8098
			9.922	5.139	0.285719	1.05218					2.736	18.656	0.0787872	3.81969					72.517	12.645	2.21085	1.92329				3.516	22.913	0.107193	3.48504					24.826	2.258	1.4549	1.01258				1.778	66.655	0.104198	29.8909
			7.105	5.525	0.204599	1.13121					3.189	19.025	0.091832	3.89524					73.064	11.326	2.22752	1.72267				3.181	40.965	0.0969801	6.23072					20.407	1.712	1.19593	0.767731				2.998	49.872	0.175695	22.3647
			11.93	6.917	0.343542	1.41621					1.493	12.94	0.0429932	2.64938					71.997	9.175	2.19499	1.39551				3.218	41.857	0.0981081	6.36639					24.103	2.492	1.41253	1.11752				2.957	62.735	0.173292	28.133
			14.022	5.351	0.403785	1.09558					2.171	11.611	0.0625172	2.37728					0.957	7.61	0.0291763	1.15747				3.596	20.269	0.109632	3.08289					22.887	2.355	1.34127	1.05608				1.799	48.502	0.105429	21.7503
			47.97	6.027	1.38137	1.23399					2.341	17.598	0.0674126	3.60307					65.301	12.87	1.99085	1.95751				2.441	48.914	0.0744195	7.43975					29.332	2.848	1.71897	1.27716				2.728	43.061	0.159872	19.3103
			35.361	5.815	1.01827	1.19058					1.963	21.02	0.0565275	4.30371					71.852	9.5	2.19057	1.44494				0.873	6.058	0.0266154	0.921414					21.354	1.961	1.25143	0.879393				2.324	29.937	0.136196	13.425
			44.985	5.461	1.29541	1.1181					2.126	10.36	0.0612214	2.12114					75.592	8.625	2.3046	1.31185				1.255	28.045	0.0382616	4.26561					23.058	1.694	1.35129	0.759659				2.157	40.419	0.126409	18.1255
			37.29	5.303	1.07382	1.08575					2.363	18.377	0.0680461	3.76257					69.123	13.678	2.10737	2.08041				0.882	7.109	0.0268898	1.08127					16.314	1.573	0.956066	0.705398				1.487	39.123	0.0871442	17.5444
			52.858	4.934	1.52213	1.0102					0.454	2.273	0.0130736	0.465382					53.844	15.16	1.64156	2.30582				1.414	32.841	0.043109	4.99507					23.025	1.845	1.34936	0.827374				2.207	29.078	0.129339	13.0398
			30.189	5.069	0.869338	1.03784					2.872	10.368	0.0827035	2.12278					90.187	9.563	2.74956	1.45452				1.047	41.682	0.0319202	6.33978					20.676	1.679	1.2117	0.752933				1.585	50.594	0.0928874	22.6884
			47.3	5.491	1.36207	1.12425					2.68	11.386	0.0771746	2.33121					70.07	8.325	2.13624	1.26622				2.955	33.565	0.09009	5.10519					17.645	1.605	1.03407	0.719748				1.923	68.649	0.112696	30.785
			51.455	5.301	1.48172	1.08534					1.341	2.077	0.0386161	0.425252					55.719	7.539	1.69872	1.14667				2.041	40.653	0.0622246	6.18327					0.285	1.775	0.0167022	0.795983				2.569	57.313	0.150554	25.7015
			27.093	4.791	0.780184	0.980925					1.742	39.059	0.0501635	7.99707					74.608	9.083	2.2746	1.38151				2.116	20.916	0.0645111	3.1813					0.224	2.331	0.0131273	1.04532				1.916	12.433	0.112285	5.57547
			37.676	5.524	1.08494	1.131					3.43	18.393	0.098772	3.76584					63.414	7.449	1.93332	1.13298				0.946	5.337	0.028841	0.811751					23.774	1.82	1.39325	0.816163				2.687	60.372	0.157469	27.0733
			25.435	4.491	0.732439	0.919502					2.483	19.36	0.0715017	3.96383					81.273	10.028	2.47779	1.52525				3.455	14.643	0.105334	2.22718					22.15	1.529	1.29808	0.685667				2.656	55.753	0.155652	25.0019
			31.108	5.02	0.895802	1.02781					3.649	17.298	0.105078	3.54165					35.828	11.885	1.0923	1.80769				2.815	62.657	0.0858217	9.53005					20.114	1.681	1.17876	0.75383				3.096	56.097	0.181438	25.1562
			30.758	4.739	0.885723	0.970279					2.174	25.01	0.0626036	5.12063					0.921	7.867	0.0280788	1.19656				2.284	26.79	0.069633	4.07472					20.485	1.755	1.2005	0.787014				1.718	43.77	0.100682	19.6283
			28.776	5.434	0.828648	1.11258					3.784	17.413	0.108966	3.5652					88.77	8.039	2.70636	1.22272				1.004	6.962	0.0306092	1.05891					23.469	1.908	1.37538	0.855626				1.456	16.623	0.0853275	7.45444
			23.955	5.389	0.68982	1.10336					2.732	27.632	0.078672	5.65747					65.247	7.222	1.9892	1.09846				3.149	33.569	0.0960045	5.1058					26.417	2.62	1.54814	1.17492				2.25	46.643	0.131859	20.9166
			30.153	5.617	0.868301	1.15004					1.876	16.116	0.0540222	3.29964					53.832	7.929	1.64119	1.20599				3.319	13.916	0.101187	2.11661					24.02	2.25	1.40767	1.00899				0.826	9.367	0.0484069	4.20055
			27.983	4.954	0.805812	1.0143					2.969	10.019	0.0854968	2.05132					78.592	11.331	2.39606	1.72343				1.642	10.384	0.0500601	1.57939					26.326	2.189	1.54281	0.981638				0.849	9.559	0.0497548	4.28665
			30.526	4.75	0.879042	0.972531					1.864	17.943	0.0536767	3.67371					69.36	7.694	2.1146	1.17025				3.066	54.994	0.093474	8.36451					17.449	1.348	1.02258	0.604499				1.917	38.568	0.112344	17.2955
			26.224	4.883	0.755159	0.999762					2.438	29.07	0.0702059	5.95189					68.282	7.976	2.08173	1.21314				2.548	70.376	0.0776816	10.7041					21.655	2.023	1.26907	0.907197				2.571	66.73	0.150671	29.9245
			37.268	5.213	1.07319	1.06733					2.583	23.634	0.0743814	4.8389					42.52	14.411	1.29632	2.19189				2.986	36.759	0.0910351	5.59099					17.89	1.709	1.04843	0.766386				1.659	28.897	0.0972241	12.9586
			38.536	5.23	1.1097	1.07081					2.593	12.897	0.0746693	2.64058					59.172	8.724	1.80399	1.32691				2.589	48.047	0.0789316	7.30788					24.326	2.205	1.4256	0.988813				2.158	46.188	0.126468	20.7126
			26.419	4.383	0.760775	0.89739					2.602	35.287	0.0749285	7.22478					75.436	8.759	2.29984	1.33223				1.068	6.118	0.0325604	0.93054					22.07	2.282	1.29339	1.02334				2.129	57.888	0.124768	25.9594
			16.868	4.543	0.485739	0.930149					2.093	18.874	0.0602711	3.86433					4.279	11.295	0.130455	1.71795				1.895	17.019	0.0577734	2.58857					27.754	2.002	1.6265	0.897779				3.087	68.741	0.180911	30.8263
			15.823	4.662	0.455647	0.954514					2.707	16.255	0.0779521	3.3281					84.716	11.575	2.58276	1.76054				0.885	7.203	0.0269813	1.09557					23.573	2.003	1.38147	0.898228				1.023	9.628	0.0599519	4.31759
			24.74	4.573	0.712425	0.936291					1.958	32.252	0.0563835	6.60338					87.3	8.936	2.66154	1.35915				2.486	33.724	0.0757914	5.12938					30.495	2.69	1.78713	1.20631				1.808	21.436	0.105956	9.61279
			32.654	4.829	0.940321	0.988706					2.425	29.777	0.0698315	6.09664					61.055	8.143	1.8614	1.23854				2.273	52.38	0.0692976	7.96693					22.315	1.669	1.30775	0.748448				1.735	33.155	0.101678	14.8681
			45.18	5.486	1.30103	1.12322					2.246	26.937	0.0646769	5.51517					65.631	8.906	2.00091	1.35459				3.14	49.893	0.0957301	7.58866					20.984	1.627	1.22975	0.729614				1.772	19.14	0.103846	8.58317
			34.984	5.137	1.00742	1.05177					1.494	24.693	0.043022	5.05573					51.566	17.177	1.57211	2.6126				3.351	65.025	0.102163	9.89022					22.532	1.998	1.32047	0.895986				0.831	4.103	0.0487	1.83995
			1.834	5.243	0.0528128	1.07347					2.622	20.225	0.0755044	4.14093					86.652	11.308	2.64179	1.71993				2.353	32.621	0.0717366	4.96161					17.971	2.028	1.05317	0.909439				1.766	32.007	0.103495	14.3533
			34.397	3.971	0.990513	0.813036					2.379	31.387	0.0685069	6.42628					0.596	5.82	0.0181704	0.885214				1.998	61.763	0.0609136	9.39407					24.33	1.804	1.42584	0.808988				0.846	5.54	0.049579	2.48436
			26.684	4.515	0.768406	0.924416					2.136	12.088	0.0615093	2.47494					14.502	3.605	0.442127	0.548316				1.952	7.565	0.0595112	1.15063					25.12	2.155	1.47213	0.966391				2.41	31.234	0.141236	14.0066
			14.765	4.418	0.42518	0.904556					2.07	29.114	0.0596088	5.9609					1.981	3.861	0.0603953	0.587253				2.869	60.823	0.087468	9.2511					26.181	1.922	1.53431	0.861904				2.246	52.75	0.131625	23.6553
			34.837	4.907	1.00318	1.00468					2.205	33.969	0.0634963	6.95493					1.001	4.791	0.0305178	0.728705				2.396	35.923	0.0730476	5.46384					27.087	2.086	1.58741	0.935448				2.058	18.148	0.120607	8.13831
			22.826	6.56	0.657309	1.34312					2.434	21.418	0.0700907	4.38519					1.006	11.487	0.0306702	1.74716				3.113	43.859	0.0949069	6.6709					19.89	1.774	1.16563	0.795535				2.268	45.739	0.132914	20.5113
			31.556	4.657	0.908702	0.95349					2.794	34.446	0.0804574	7.05259					0.68	9.823	0.0207314	1.49407				2.915	57.973	0.0888705	8.81762					20.727	1.819	1.21469	0.815715				2.444	30.129	0.143228	13.5111
			33.219	4.838	0.956591	0.990548					2.881	29.308	0.0829627	6.00062					2.853	4.577	0.0869803	0.696156				3.081	60.935	0.0939314	9.26813					27.489	2.147	1.61097	0.962803				2.1	22.444	0.123068	10.0648
			0.842	4.312	0.0242467	0.882853					3.119	44.056	0.0898163	9.02017					2.93	9.582	0.0893278	1.45741				2.578	57.229	0.0785962	8.70445					25.852	1.979	1.51503	0.887465				27.831	7.365	1.63101	3.30277
			33.334	4.75	0.959903	0.972531					2.165	28.008	0.0623444	5.73445					6.768	3.491	0.206338	0.530976				2.852	56.19	0.0869498	8.54642					22.729	2	1.33201	0.896882				2.245	55.824	0.131566	25.0338
			1.058	3.365	0.0304667	0.688961					2.463	26.673	0.0709258	5.46112					78.01	11.73	2.37831	1.78412				2.279	41.458	0.0694805	6.30571					23.068	2.147	1.35188	0.962803				2.119	68.685	0.124182	30.8012
			0.945	6.595	0.0272127	1.35028					1.582	47.537	0.0455561	9.73289					84.465	13.452	2.57511	2.04603				2.598	42.515	0.079206	6.46647					24.087	2.007	1.4116	0.900022				2.261	48.88	0.132504	21.9198
			25.035	4.528	0.72092	0.927078					0.848	5.058	0.0244194	1.03559					64.284	11.796	1.95985	1.79416				3.108	57.441	0.0947545	8.7367					20.252	1.63	1.18685	0.730959				1.853	63.42	0.108593	28.4401
			27.723	4.859	0.798325	0.994848					1.074	3.764	0.0309274	0.770654					1.573	2.433	0.0479565	0.370056				2.591	57.382	0.0789926	8.72773					22.331	1.749	1.30869	0.784324				2.259	32.287	0.132387	14.4788
			43.511	4.832	1.25296	0.98932					3.048	41.522	0.0877717	8.50135					72.162	9.21	2.20002	1.40083				2.29	67.744	0.0698159	10.3038					24.67	2.427	1.44576	1.08837				2.249	48.26	0.1318	21.6418
			14.113	4.558	0.406405	0.93322					1.774	33.405	0.051085	6.83945					53.53	8.605	1.63198	1.30881				3.039	69.822	0.0926509	10.6198					21.127	2.123	1.23813	0.952041				35.78	7.21	2.09685	3.23326
			16.6	6.08	0.478022	1.24484					1.819	43.252	0.0523808	8.85556					88.956	9.881	2.71203	1.50289				2.424	72.676	0.0739012	11.0539					21.276	1.614	1.24686	0.723784				2.955	51.632	0.173175	23.1539
			51.603	4.96	1.48599	1.01553					2.843	31.942	0.0818684	6.53991					1.265	3.658	0.0385664	0.556377				0.749	6.866	0.022835	1.04431					26.453	2.788	1.55025	1.25025				4.121	39.567	0.241507	17.7435
			24.262	4.188	0.698661	0.857465					2.23	42.58	0.0642162	8.71797					86.986	10.438	2.65197	1.58761				2.598	73.1	0.079206	11.1184					19.743	2.24	1.15702	1.00451				2.052	55.886	0.120255	25.0616
			26.739	4.845	0.76999	0.991982					3.807	51.293	0.109628	10.5019					1.829	6.518	0.0557613	0.991379				2.748	69.167	0.0837791	10.5202					23.261	1.971	1.36319	0.883878				5.142	54.071	0.301342	24.2477
			53.291	4.051	1.53459	0.829415					1.878	25.546	0.0540798	5.23037					51.519	10.461	1.57067	1.5911				2.748	70.534	0.0837791	10.7281					25.225	2.711	1.47829	1.21572				3.956	43.235	0.231838	19.3884
			34.833	4.516	1.00307	0.924621					2.422	38.729	0.0697451	7.92951					3.522	2.239	0.107376	0.340549				2.81	34.847	0.0856693	5.30018					15.452	2.409	0.90555	1.08029				3.126	66.149	0.183196	29.6639
			44.675	4.335	1.28648	0.887562					2.256	53.161	0.0649649	10.8844					0.757	3.911	0.0230789	0.594858				0.934	5.007	0.0284751	0.761558					18.412	2.108	1.07902	0.945314				1.789	33.813	0.104843	15.1631
			21.46	4.158	0.617973	0.851323					2.429	51.148	0.0699467	10.4722					57.278	10.238	1.74625	1.55719				3.35	66.124	0.102132	10.0574					16.932	1.502	0.992284	0.673559				2.602	24.436	0.152488	10.9581
			18.948	4.575	0.545636	0.936701					2.361	24.909	0.0679885	5.09995					3.145	7.925	0.0958825	1.20538				2.277	32.494	0.0694196	4.94229					21.207	2.097	1.24282	0.940381				1.355	38.825	0.0794085	17.4107
			32.224	4.656	0.927938	0.953285					2.538	31.42	0.0730855	6.43304					56.163	10.709	1.71226	1.62882				4.208	35.086	0.128291	5.33653					24.531	2.764	1.43762	1.23949				3.493	59.957	0.204704	26.8872
			39.617	5.749	1.14083	1.17707					2.401	44.803	0.0691404	9.17312					45.005	11.651	1.37208	1.7721				2.818	50.396	0.0859132	7.66516					19.875	1.799	1.16476	0.806746				3.096	67.168	0.181438	30.1209
			13.345	4.833	0.384289	0.989525					2.03	43.584	0.0584569	8.92353					56.614	10.061	1.72601	1.53026				0.629	0.908	0.0191765	0.138106					20.727	1.477	1.21469	0.662348				3.373	59.727	0.197671	26.784
			28.742	4.081	0.827669	0.835558					1.99	30.885	0.057305	6.3235					3.972	4.293	0.121096	0.65296				1.57	57.015	0.0478651	8.67191					20.832	1.945	1.22084	0.872218				3.233	63.759	0.189467	28.5922
			40.991	3.448	1.1804	0.705955					2.458	42.3	0.0707818	8.66064					39.944	10.02	1.21778	1.52403				2.39	44.104	0.0728646	6.70816					19.785	2.076	1.15948	0.930964				4.087	56.354	0.239515	25.2715
			21.487	4.066	0.61875	0.832487					2.24	24.09	0.0645042	4.93227					1.339	12.796	0.0408225	1.94625				2.589	36.975	0.0789316	5.62385					23.685	1.771	1.38804	0.794189				3.824	67.421	0.224102	30.2344
			21.226	3.488	0.611235	0.714145					1.93	37.616	0.0555772	7.70163					73.654	10.594	2.24551	1.61133				2.911	32.424	0.0887485	4.93165					23.279	1.717	1.36424	0.769974				2.311	28.052	0.135434	12.5797
			19.275	4.347	0.555053	0.890019					2.631	57.271	0.0757636	11.7259					2.024	6.628	0.0617063	1.00811				2.659	33.245	0.0810657	5.05652					19.24	2.091	1.12754	0.937691				3.035	51.209	0.177863	22.9642
			9.115	7.062	0.26248	1.4459					1.962	54.083	0.0564987	11.0731					40.886	10.789	1.2465	1.64099				2.502	54.797	0.0762792	8.33455					0.195	0.829	0.0114278	0.371758				3.576	81.989	0.209568	36.7672
			26.497	5.788	0.763021	1.18505					2.473	22.077	0.0712137	4.52012					52.313	9.619	1.59488	1.46304				3.105	45.433	0.094663	6.9103					35.436	3.016	2.07669	1.3525				3.058	41.646	0.179211	18.6758
			16.422	3.984	0.472896	0.815698					2.407	31.649	0.0693132	6.47992					1.394	6.643	0.0424993	1.01039				3.184	51.767	0.0970715	7.87369					25.449	3.164	1.49141	1.41887				2.478	67.313	0.145221	30.1859
			44.518	4.799	1.28196	0.982563					3.1	42.504	0.0892692	8.70241					41.822	10.018	1.27504	1.52372				2.747	52.968	0.0837486	8.05636					18.074	2.924	1.05921	1.31124				3.516	55.102	0.206052	24.71
			25.578	4.565	0.736557	0.934653					2.619	51.994	0.075418	10.6454					24.886	10.022	0.758707	1.52433				2.793	54.63	0.085151	8.30915					22.149	2.805	1.29802	1.25788				1.711	42.7	0.100272	19.1484
			24.186	4.115	0.696472	0.842519					3.013	40.705	0.0867639	8.33408					58.497	10.239	1.78342	1.55734				2.686	37.736	0.0818889	5.7396					40.186	3.546	2.35506	1.59017				2.238	40.981	0.131156	18.3776
			40.966	3.569	1.17968	0.730729					2.502	31.164	0.0720488	6.38062					60.822	9.773	1.8543	1.48646				2.588	39.92	0.0789011	6.07178					30.162	3.26	1.76761	1.46192				2.801	66.261	0.16415	29.7142
			58.599	4.372	1.68745	0.895138					2.327	47.283	0.0670095	9.68088					62.976	10.025	1.91997	1.52479				2.5	38.445	0.0762182	5.84743					24.271	2.21	1.42238	0.991055				5.209	64.978	0.305268	29.1388
			34.922	4.324	1.00563	0.88531					2.109	37.865	0.0607318	7.75261					54.014	9.407	1.64674	1.43079				2.885	57.301	0.0879558	8.71541					14.669	14.266	0.859663	6.39746				2.535	49.794	0.148561	22.3297
			45.887	6.422	1.32138	1.31486					2.363	42.732	0.0680461	8.74909					39.611	11.499	1.20763	1.74898				2.619	39.463	0.0798462	6.00227					25.209	2.246	1.47735	1.0072				1.969	71.064	0.115391	31.868
			32.29	3.808	0.929839	0.779663					1.878	43.451	0.0540798	8.8963					6.84	12.16	0.208533	1.84952				2.306	21.894	0.0703037	3.33005					49.193	3.534	2.88291	1.58479				2.293	44.868	0.134379	20.1207
			39.821	4.634	1.14671	0.948781					3.897	39.174	0.11222	8.02062					82.194	10.275	2.50587	1.56281				2.501	42.999	0.0762487	6.54009					37.206	2.26	2.18042	1.01348				2.921	61.178	0.171182	27.4347
			30.837	3.825	0.887998	0.783143					2.028	36.282	0.0583993	7.4285					52.309	9.628	1.59476	1.46441				1.918	53.757	0.0584746	8.17637					8.168	5.629	0.478678	2.52428				3.152	66.821	0.18472	29.9653
			17.307	3.968	0.498381	0.812422					2.124	18.134	0.0611638	3.71282					48.831	10.956	1.48873	1.66639				2.719	43.755	0.082895	6.65508					49.16	3.615	2.88097	1.62112				1.639	31.629	0.096052	14.1837
			38.339	4.367	1.10403	0.894114					2.208	23.316	0.0635827	4.7738					59.015	10.005	1.79921	1.52175				3.177	78.606	0.0968581	11.9559					23.193	2.104	1.3592	0.94352				3.01	50.705	0.176398	22.7382
			34.577	5.1	0.995697	1.04419					2.282	26.619	0.0657136	5.45006					68.854	10.952	2.09917	1.66578				2.333	50.405	0.0711269	7.66653					26.28	2.083	1.54011	0.934103				2.072	43.251	0.121428	19.3955
			28.148	4.81	0.810564	0.984816					2.528	25.856	0.0727976	5.29384					32.142	8.458	0.979923	1.28645				2.779	65.71	0.0847242	9.9944					6.913	5.158	0.40513	2.31306				2.256	48.697	0.132211	21.8377
			36.339	4.238	1.04644	0.867702					6.429	44.037	0.185133	9.01628					55.396	10.366	1.68887	1.57665				2.733	48.388	0.0833218	7.35975					11.788	11.016	0.690824	4.94003				3.086	65.212	0.180852	29.2437
			39.214	4.806	1.12923	0.983997					1.68	23.009	0.0483781	4.71094					87.689	11.212	2.6734	1.70533				2.55	37.08	0.0777426	5.63982					0.294	3.13	0.0172296	1.40362				1.486	28.474	0.0870856	12.7689
			21.191	3.785	0.610227	0.774954					0.761	3.08	0.0219141	0.63061					11.612	11.304	0.354018	1.71932				3.058	33.4	0.0932301	5.0801					9.246	4.944	0.541853	2.21709				2.732	68.282	0.160106	30.6205
			29.799	4.21	0.858107	0.86197					2.786	32.278	0.080227	6.60871					50.554	10.672	1.54125	1.6232				3.083	23.917	0.0939923	3.63774					31.767	2.698	1.86167	1.20989				2.03	47.857	0.118966	21.4611
			30.322	4.01	0.873167	0.821021					3.297	28.87	0.0949421	5.91094					43.059	10.546	1.31275	1.60403				3.021	65.966	0.0921021	10.0333					18.316	1.99	1.07339	0.892398				1.952	40.734	0.114395	18.2668
			25.75	4.163	0.74151	0.852347					2.317	22.278	0.0667215	4.56127					13.049	17.687	0.397829	2.69017				2.379	73.631	0.0725293	11.1992					45.027	3.661	2.63876	1.64174				3.345	72.446	0.196031	32.4878
			27.144	5.123	0.781652	1.0489					1.772	41.5	0.0510274	8.49685					35.214	9.616	1.07358	1.46258				3.67	57.599	0.111888	8.76073					18.953	2.063	1.11072	0.925134				2.614	70.265	0.153191	31.5097
			29.961	5.569	0.862772	1.14022					1.512	48.787	0.0435403	9.98881					38.931	8.487	1.1869	1.29086				2.475	52.262	0.0754561	7.94898					8.509	4.368	0.498662	1.95879				2.546	52.694	0.149206	23.6302
			32.572	4.142	0.93796	0.848047					2.482	50.048	0.0714729	10.247					38.829	8.724	1.18379	1.32691				3.356	45.959	0.102315	6.9903					27.983	3.544	1.63992	1.58928				3.194	76.627	0.187181	34.3627
			25.984	4.179	0.748248	0.855623					2.095	21.197	0.0603287	4.33995					32.688	9.715	0.996569	1.47764				0.841	6.936	0.0256398	1.05496					28.727	2.137	1.68352	0.958319				3.226	72.434	0.189057	32.4824
			21.176	4.186	0.609795	0.857056					1.252	34.671	0.0360532	7.09866					73.649	10.259	2.24536	1.56038				3.429	53.355	0.104541	8.11522					18.51	20.58	1.08476	9.22892				1.911	23.594	0.111992	10.5805
			19.538	4.359	0.562626	0.892476					1.493	50.171	0.0429932	10.2722					34.862	8.452	1.06285	1.28554				2.273	34.459	0.0692976	5.24117					18.966	1.97	1.11148	0.883429				1.534	56.987	0.0898986	25.5553
			21.554	3.889	0.62068	0.796247					2.715	27.692	0.0781825	5.66975					50.534	9.752	1.54064	1.48327				3.051	42.885	0.0930167	6.52275					13.351	1.989	0.782422	0.89195				2.154	34.766	0.126233	15.5905
			28.85	4.289	0.830779	0.878144					2.046	29.929	0.0589176	6.12776					9.536	10.769	0.290727	1.63795				2.542	54.442	0.0774987	8.28056					24.79	1.753	1.45279	0.786117				2.038	56.922	0.119435	25.5262
			17.712	4.667	0.510044	0.955537					1.254	43.853	0.0361108	8.97861					21.428	48.97	0.653282	7.44827				3.772	58.73	0.114998	8.93275					7.597	1.568	0.445215	0.703156				1.771	45.914	0.103788	20.5897
			25.096	3.842	0.722677	0.786624					38.962	6.457	1.12197	1.32203					47.034	10.949	1.43394	1.66533				3.356	53.977	0.102315	8.20983					12.521	1.963	0.733781	0.88029				2.367	30.233	0.138716	13.5577
			29.418	3.962	0.847135	0.811193					0.922	5.371	0.0265504	1.09968					28.722	14.912	0.875656	2.2681				2.142	37.678	0.0653038	5.73077					7.989	9.169	0.468188	4.11176				2.7	29.348	0.158231	13.1609
			36.916	3.765	1.06305	0.770859					2.297	43.551	0.0661456	8.91678					61.098	8.99	1.86271	1.36737				2.993	51.063	0.0912485	7.76661					15.086	17.678	0.8841	7.92754				3.558	54.708	0.208513	24.5333
			27.624	4.086	0.795475	0.836581					2.671	54.318	0.0769155	11.1212					22.356	10.026	0.681574	1.52494				2.432	66.078	0.0741451	10.0504					19.416	3.066	1.13786	1.37492				1.64	58.207	0.0961106	26.1024
			23.719	5.173	0.683024	1.05914					2.353	31.945	0.0677582	6.54053					65.944	9.602	2.01045	1.46045				2.548	26.333	0.0776816	4.00521					18.58	1.921	1.08886	0.861456				2.259	35.509	0.132387	15.9237
			21.295	4.88	0.613221	0.999148					21.596	6.826	0.621889	1.39758					40.942	9.182	1.24821	1.39657				2.527	55.827	0.0770414	8.49121					23.421	1.873	1.37257	0.83993				1.744	31.958	0.102205	14.3313
			16.99	3.829	0.489253	0.783962					2.585	40.134	0.074439	8.21717					52.616	9.808	1.60412	1.49178				2.087	52.912	0.063627	8.04784					18.317	2.618	1.07345	1.17402				2.852	76.645	0.167139	34.3708
			20.039	4.776	0.577053	0.977854					2.276	44.049	0.0655408	9.01874					53.256	9.15	1.62363	1.3917				2.2	31.81	0.067072	4.83826					20.812	2.041	1.21967	0.915269				2.734	44.043	0.160223	19.7507
			16.163	3.99	0.465438	0.816926					2.488	45.078	0.0716457	9.22942					38.539	7.762	1.17495	1.18059				2.008	48.456	0.0612185	7.37009					32.075	1.951	1.87972	0.874909				2.749	57.824	0.161102	25.9307
			17.233	4.431	0.49625	0.907218					32.732	5.334	0.942567	1.0921					51.45	9.702	1.56857	1.47566				1.978	54.355	0.0603039	8.26732					24.137	2.165	1.41453	0.970875				2.1	37.572	0.123068	16.8488
			25.399	4.616	0.731402	0.945095					2.959	18.032	0.0852088	3.69193					42.351	10.782	1.29117	1.63993				3.069	56.676	0.0935655	8.62034					14.343	2.02	0.840558	0.905851				2.177	42.015	0.127581	18.8413
			19.992	3.739	0.5757	0.765535					2.817	55.912	0.0811197	11.4476					36.825	7.477	1.12269	1.13724				2.304	60.742	0.0702427	9.23878					11.288	6.307	0.661522	2.82832				3.387	15.26	0.198492	6.84321
			31.208	5.253	0.898681	1.07552					2.387	61.271	0.0687372	12.5448					32.771	17.892	0.999099	2.72135				2.535	62.466	0.0772853	9.501					15.858	1.937	0.929343	0.868631				2.214	56.11	0.129749	25.162
			25.118	3.842	0.72331	0.786624					2.051	54.687	0.0590616	11.1968					3.524	6.014	0.107437	0.914721				3.129	62.498	0.0953947	9.50586					18.713	2.671	1.09666	1.19779				2.509	45.87	0.147038	20.57
			23.227	4.113	0.668856	0.842109					38.571	6.232	1.11071	1.27596					42.177	9.173	1.28586	1.3952				3.354	53.652	0.102254	8.1604					19.418	3.102	1.13797	1.39106				1.541	65.774	0.0903088	29.4958
			21.306	3.777	0.613538	0.773316					2.027	53.591	0.0583705	10.9724					47.253	11.076	1.44062	1.68464				2.699	45.115	0.0822852	6.86193					9.705	20.015	0.568752	8.97555				2.688	43.556	0.157528	19.5323
			24.976	3.746	0.719221	0.766969					3.013	46.454	0.0867639	9.51115					34.041	8.077	1.03782	1.2285				3.523	65.144	0.107407	9.90832					13.845	1.802	0.811373	0.808091				2.801	51.237	0.16415	22.9768
			15.35	4.454	0.442026	0.911927					43.298	5.52	1.24683	1.13018					28.997	16.906	0.88404	2.57138				3.32	73.513	0.101218	11.1812					17.45	2.292	1.02264	1.02783				3.558	60.268	0.208513	27.0267
			30.038	3.693	0.864989	0.756117					1.915	45.54	0.0551453	9.32401					41.085	8.148	1.25257	1.2393				2.655	62.258	0.0809438	9.46936					28.899	2.02	1.6936	0.905851				2.753	66.353	0.161337	29.7554
			20.992	4.391	0.604496	0.899028					0.662	6.776	0.0190633	1.38734					21.887	15.696	0.667275	2.38734				2.529	33.774	0.0771024	5.13698					18.752	1.57	1.09894	0.704053				4.211	60.341	0.246782	27.0594
			35.897	4.098	1.03371	0.839038					46.725	5.997	1.34552	1.22785					47.835	8	1.45836	1.21679				2.32	27.078	0.0707305	4.11853					11.962	1.851	0.701021	0.830065				2.686	61.877	0.15741	27.7482
			19.157	3.728	0.551655	0.763283					2.007	54.53	0.0577946	11.1647					42.431	10.298	1.29361	1.56631				2.268	53.397	0.0691452	8.12161					12.468	1.446	0.730675	0.648446				1.985	27.454	0.116329	12.3115
			25.477	4.13	0.733648	0.84559					2.192	33.44	0.0631219	6.84662					10.416	39.839	0.317556	6.05946				2.237	49.844	0.0682001	7.58121					11.079	1.823	0.649274	0.817508				2.59	56.311	0.151784	25.2522
			21.299	3.879	0.613337	0.794199					36.195	6.061	1.04229	1.24095					45.867	9.309	1.39836	1.41589				1.89	52.351	0.057621	7.96252					25.024	2.78	1.46651	1.24667				2.714	40.597	0.159051	18.2054
			19.693	4.441	0.567089	0.909265					35.45	6.449	1.02084	1.32039					24.506	65.672	0.747122	9.98862				4.011	50.061	0.122285	7.61421					9.344	1.435	0.547596	0.643513				2.148	58.191	0.125881	26.0952
			26.484	4.479	0.762647	0.917046					37.272	5.818	1.0733	1.1912					31.696	8.144	0.966325	1.23869				2.999	69.373	0.0914314	10.5515					27.377	2.268	1.6044	1.01706				4.362	38.053	0.255631	17.0645
			25.899	4.727	0.745801	0.967822					2.684	49.635	0.0772898	10.1624					17.257	28.526	0.526119	4.33877				2.103	44.497	0.0641148	6.76793					6.263	1.504	0.367037	0.674456				2.354	52.343	0.137954	23.4728
			16.487	4.503	0.474768	0.921959					1.133	6.751	0.0326264	1.38222					40.591	10.029	1.23751	1.5254				2.433	51.846	0.0741756	7.88571					17.285	2.473	1.01297	1.109				1.751	7.991	0.102616	3.58349
			17.761	3.735	0.511455	0.764716					2.284	25.878	0.0657712	5.29835					47.504	8.777	1.44827	1.33497				2.533	36.258	0.0772243	5.51479					20.054	1.473	1.17525	0.660554				1.818	50.518	0.106542	22.6544
			28.132	3.943	0.810103	0.807303					41.463	6.181	1.19399	1.26552					11.869	58.436	0.361854	8.88804				2.359	35.495	0.0719195	5.39874					31.757	2.53	1.86109	1.13456				2.812	55.379	0.164795	24.8342
			26.011	4.559	0.749026	0.933425					2.009	19.883	0.0578522	4.07091					28.007	50.937	0.853858	7.74745				2.237	54.136	0.0682001	8.23401					19.054	1.596	1.11664	0.715712				1.606	57.548	0.0941181	25.8069
			18.976	3.954	0.546442	0.809555					2.673	25.341	0.076973	5.1884					13.286	53.676	0.405054	8.16405				2.731	54.737	0.0832608	8.32542					10.559	1.588	0.6188	0.712125				2.18	68.042	0.127757	30.5128
			42.14	4.883	1.21348	0.999762					2.946	51.061	0.0848345	10.4544					53.727	8.724	1.63799	1.32691				1.609	45.213	0.0490541	6.87684					18.224	2.08	1.068	0.932758				2.377	38.894	0.139302	17.4417
			19.248	4.52	0.554275	0.92544					2.827	48.114	0.0814077	9.85102					22.299	41.691	0.679836	6.34115				2.791	38.606	0.08509	5.87192					23.929	2.098	1.40234	0.94083				1.883	44.879	0.110351	20.1256
			31.765	4.351	0.914721	0.890838					17.262	18.026	0.497085	3.6907					21.395	25.955	0.652276	3.94772				2.615	39.988	0.0797243	6.08212					11.751	1.673	0.688656	0.750242				3.014	64.323	0.176633	28.8451
			26.16	4.226	0.753316	0.865245					2.133	53.727	0.0614229	11.0002					12.567	61.335	0.383134	9.32897				3.151	69.797	0.0960655	10.616					0.49	2.992	0.028716	1.34174				2.842	61.182	0.166553	27.4365
			20.253	4.479	0.583216	0.917046					2.191	20.98	0.0630931	4.29552					29.498	8.647	0.899314	1.3152				2.668	45.295	0.0813401	6.88931					11.683	1.573	0.684671	0.705398				1.897	39.408	0.111172	17.6722
			28.352	5.403	0.816438	1.10623					2.161	46.887	0.0622292	9.5998					28.561	8.95	0.870748	1.36128				2.997	46.886	0.0913704	7.1313					36.184	3.004	2.12053	1.34712				3.112	50.451	0.182376	22.6243
			43.794	4.098	1.26111	0.839038					2.537	44.156	0.0730567	9.04065					52.332	11.94	1.59546	1.81606				2.763	65.81	0.0842364	10.0096					11.863	7.965	0.69522	3.57183				3.238	50.39	0.18976	22.597
			9.707	3.189	0.279528	0.652927					1.988	34.066	0.0572474	6.97479					42.69	8.225	1.3015	1.25101				2.005	48.729	0.061127	7.41162					38.979	2.899	2.28433	1.30003				1.957	47.828	0.114688	21.448
			22.352	3.655	0.643659	0.748337					36.386	7.166	1.04779	1.46719					54.264	8.936	1.65436	1.35915				2.905	21.663	0.0885656	3.29491					12.297	2.759	0.720654	1.23725				2.106	53.728	0.12342	24.0939
			7.819	3.09	0.22516	0.632657					40.953	6.889	1.1793	1.41048					43.69	10.204	1.33199	1.55201				3.55	27.113	0.10823	4.12385					20.643	2.736	1.20976	1.22694				2.172	49.553	0.127288	22.2216
			20.842	4.142	0.600177	0.848047					1.993	48.047	0.0573914	9.8373					33.876	8.575	1.03279	1.30425				1.998	39.335	0.0609136	5.9828					28.411	2.913	1.665	1.30631				1.884	41.55	0.11041	18.6327
			38.367	5.262	1.10484	1.07736					2.076	35.836	0.0597815	7.33718					36.688	8.483	1.11852	1.29025				2.917	63.999	0.0889314	9.73416					16.181	3.026	0.948272	1.35698				4.13	54.022	0.242035	24.2257
			24.314	3.629	0.700158	0.743014					2.175	49.645	0.0626324	10.1645					11.263	49.771	0.343378	7.5701				2.718	59.892	0.0828645	9.10949					25.337	3.855	1.48485	1.72874				3.246	50.189	0.190229	22.5068
			25.008	4.232	0.720143	0.866474					1.924	51.624	0.0554045	10.5697					63.195	7.284	1.92664	1.10789				2.304	62.947	0.0702427	9.57415					3.17	2.739	0.185775	1.22828				45.311	7.219	2.65541	3.2373
			22.967	4.18	0.661369	0.855827					2.868	37.016	0.0825884	7.57878					59.78	8.318	1.82253	1.26516				3.252	29.739	0.0991447	4.52326					24.048	2.995	1.40931	1.34308				2.364	58.018	0.13854	26.0177
			31.472	3.9	0.906283	0.798499					2.094	40.669	0.0602999	8.32671					62.194	8.053	1.89613	1.22485				2.273	47.671	0.0692976	7.2507					3.428	3.298	0.200895	1.47896				1.798	31.678	0.10537	14.2057
			18.497	3.879	0.532649	0.794199					2.067	52.671	0.0595224	10.784					25.565	9.011	0.779408	1.37056				1.998	61.834	0.0609136	9.40487					29.788	3.76	1.7457	1.68614				2.919	78.088	0.171065	35.0179
			19.704	4.581	0.567406	0.937929					2.28	27.276	0.065656	5.58458					32.151	18.07	0.980197	2.74842				2.445	50.903	0.0745414	7.74228					1.98	2.997	0.116036	1.34398				1.501	52.548	0.0879647	23.5647
			4.876	4.919	0.140412	1.00713					1.946	57.861	0.056038	11.8467					29.697	27.808	0.905381	4.22956				2.808	66.326	0.0856083	10.0881					3.586	2.798	0.210154	1.25474				28.446	8.134	1.66705	3.64762
			27.488	4.286	0.791558	0.87753					1.932	30.205	0.0556348	6.18427					33.424	7.753	1.01901	1.17922				3.288	51.939	0.100242	7.89985					0.398	3.86	0.0233244	1.73098				2.28	55.81	0.133617	25.0275
			26.819	3.963	0.772293	0.811398					1.977	41.87	0.0569307	8.5726					54.128	9.662	1.65022	1.46958				2.949	70.156	0.089907	10.6706					1.266	2.538	0.0741927	1.13814				2.336	13.116	0.136899	5.88176
			22.165	3.72	0.638274	0.761645					4.051	47.481	0.116655	9.72142					61.138	7.408	1.86393	1.12675				2.111	51.559	0.0643587	7.84206					2.674	3.66	0.156707	1.64129				2.074	46.854	0.121545	21.0113
			24.389	3.881	0.702318	0.794609					2.108	48.391	0.060703	9.90774					57.907	8.669	1.76543	1.31854				2.673	44.704	0.0814925	6.79942					1.608	4.278	0.0942353	1.91843				2.085	61.755	0.122189	27.6935
			10.281	3.281	0.296057	0.671763					2.559	47.194	0.0736902	9.66266					59.07	7.82	1.80088	1.18941				2.52	68.622	0.076828	10.4373					0.3	2.825	0.0175812	1.26685				2.275	55.097	0.133324	24.7078
			15.368	3.877	0.442545	0.79379					4.709	51.625	0.135603	10.5699					54.703	7.691	1.66775	1.16979				1.554	52.027	0.0473773	7.91324					0.523	4.561	0.0306499	2.04534				3.154	38.851	0.184837	17.4224
			26.823	4.334	0.772409	0.887358					3.422	37.056	0.0985416	7.58697					58.784	8.546	1.79217	1.29984				2.17	58.971	0.0661574	8.96941					0.31	4.109	0.0181673	1.84265				2.429	45.983	0.142349	20.6207
			23.552	3.965	0.678215	0.811807					3.231	62.728	0.0930415	12.8431					18.553	9.307	0.565631	1.41558				2.474	55.884	0.0754256	8.49988					36.582	3.316	2.14385	1.48703				3.287	53.427	0.192631	23.9589
			36.121	4.478	1.04016	0.916841					7.001	15.843	0.201604	3.24375					56.031	9.078	1.70823	1.38075				1.571	20.913	0.0478955	3.18084					30.219	3.031	1.77096	1.35923				1.941	49.176	0.11375	22.0525
			14.213	3.959	0.409285	0.810579					6.091	30.466	0.175399	6.23771					62.742	8.68	1.91283	1.32022				2.342	48.696	0.0714012	7.4066					20.266	1.826	1.18767	0.818854				3.749	16.042	0.219707	7.19389
			45.815	4.864	1.31931	0.995872					6.752	37.106	0.194434	7.59721					26.251	9.034	0.800322	1.37406				1.788	42.333	0.0545113	6.43879					7.352	7.166	0.430857	3.21353				2.545	62.354	0.149147	27.9621
			30.412	4.648	0.875759	0.951647					3.673	45.608	0.10577	9.33794					51.971	8.575	1.58446	1.30425				2.222	25.998	0.0677428	3.95426					37.63	2.796	2.20527	1.25384				2.271	41.376	0.13309	18.5547
			37.733	3.578	1.08658	0.732572					2.103	56.03	0.060559	11.4718					28.808	9.303	0.878278	1.41497				2.573	48.376	0.0784438	7.35793					25.551	3.438	1.49739	1.54174				3.21	67.316	0.188119	30.1873
			28.361	4.352	0.816698	0.891043					4.516	51.721	0.130045	10.5895					50.381	9.231	1.53598	1.40402				3.476	21.537	0.105974	3.27575					28.907	3.577	1.69407	1.60407				2.617	48.311	0.153367	21.6646
			0.598	8.821	0.0172203	1.80604					2.598	39.923	0.0748133	8.17397					71.709	8.193	2.18621	1.24614				3.134	47.125	0.0955472	7.16765					35.395	3.328	2.07429	1.49241				2.549	33.802	0.149382	15.1582
			1.298	5.931	0.0373779	1.21433					2.997	38.76	0.0863031	7.93585					49.723	8.461	1.51592	1.28691				1.843	19.37	0.0561881	2.94615					30.846	2.729	1.8077	1.2238				2.272	62.014	0.133148	27.8096
			1.713	13.664	0.0493284	2.79761					2.903	62.814	0.0835962	12.8607					51.25	7.497	1.56247	1.14028				3.478	61.034	0.106035	9.28319					25.052	3.195	1.46815	1.43277				1.953	54.042	0.114454	24.2347
			1.111	16.664	0.0319929	3.41184					2.679	38.957	0.0771458	7.97619					69.484	9.029	2.11838	1.3733				2.919	19.106	0.0889924	2.906					19.39	3.402	1.13633	1.5256				2.592	57.023	0.151902	25.5715
			94.411	12.986	2.71871	2.6588					8.501	20.604	0.244799	4.21853					61.803	7.786	1.88421	1.18424				3.449	61.092	0.105151	9.29201					36.448	3.089	2.136	1.38523				2.803	48.344	0.164267	21.6794
			92.955	10.205	2.67678	2.08941					1.811	28.386	0.0521505	5.81185					51.739	8.304	1.57738	1.26303				2.864	43.858	0.0873156	6.67074					32.888	3.44	1.92737	1.54264				3.197	54.907	0.187357	24.6226
			98.536	10.652	2.83749	2.18093					0.678	4.156	0.019524	0.850913					64.863	9.722	1.9775	1.4787				2.337	49.951	0.0712488	7.59748					32.62	3.138	1.91166	1.40721				2.172	33.329	0.127288	14.9461
			24.21	3.032	0.697163	0.620782					2.748	33.028	0.0791328	6.76226					59.25	8.218	1.80637	1.24995				3.333	56.325	0.101614	8.56696					36.147	3.411	2.11836	1.52963				3.118	54.526	0.182727	24.4517
			47.963	11.674	1.38117	2.39017					2.249	26.191	0.0647633	5.36243					51.777	7.701	1.57854	1.17131				2.437	52.85	0.0742975	8.03841					0.338	2.149	0.0198082	0.9637				1.892	29.434	0.110879	13.1994
			87.488	10.966	2.51935	2.24522					2.278	41.971	0.0655984	8.59328					68.106	9.563	2.07637	1.45452				2.187	46.123	0.0666757	7.01525					27.722	2.643	1.62462	1.18523				2.438	43.497	0.142877	19.5058
			73.506	10.521	2.11672	2.1541					2.505	49.494	0.0721352	10.1336					36.463	9.857	1.11166	1.49924				2.237	39.699	0.0682001	6.03816					33.839	3.513	1.9831	1.57537				1.802	45.078	0.105604	20.2148
			44.117	11.481	1.27042	2.35066					2.706	57.744	0.0779233	11.8227					77.906	10.198	2.37514	1.5511				3.923	49.564	0.119602	7.53862					21.958	2.113	1.28683	0.947556				1.712	35.408	0.10033	15.8784
			99.971	9.102	2.87881	1.86357					2.078	42.657	0.0598391	8.73374					53.393	9.12	1.62781	1.38714				2.414	65.437	0.0735963	9.95288					17.603	3.001	1.03161	1.34577				3.053	57.95	0.178918	25.9872
			104.14	11.358	2.99887	2.32548					1.847	25.58	0.0531871	5.23734					47.949	9.511	1.46184	1.44661				2.614	64.13	0.0796938	9.75409					28.203	3.098	1.65281	1.38927				2.295	39.082	0.134496	17.526
			101.299	10.823	2.91706	2.21594					1.782	24.742	0.0513154	5.06576					71.903	8.292	2.19213	1.2612				2.531	77.904	0.0771633	11.8491					25.084	2.66	1.47002	1.19285				4.294	41.465	0.251646	18.5946
			80.784	9.786	2.3263	2.00362					2.864	6.218	0.0824732	1.27309					32.257	10.113	0.983429	1.53817				2.804	76.703	0.0854864	11.6664					32.287	3.338	1.89215	1.4969				1.983	53.041	0.116212	23.7858
			12.247	10.128	0.352671	2.07364					2.157	34.205	0.0621141	7.00325					61.089	9.023	1.86244	1.37239				4.16	8.16	0.126827	1.24113					24.74	2.494	1.44986	1.11841				2.349	47.471	0.137661	21.288
			31.88	9.773	0.918032	2.00096					4.372	3.061	0.125898	0.626719					10.552	8.655	0.321702	1.31641				2.28	72.518	0.069511	11.0299					31.863	3.011	1.8673	1.35026				3.177	63.572	0.186185	28.5083
			11.282	4.898	0.324882	1.00283					4.242	13.725	0.122155	2.8101					64.21	8.406	1.95759	1.27854				2.271	51.723	0.0692366	7.867					31.327	3.008	1.83589	1.34891				3.127	48.201	0.183255	21.6153
			13.683	4.924	0.394023	1.00816					1.724	42.246	0.0496452	8.64959					68.718	9.458	2.09503	1.43855				2.906	37.749	0.0885961	5.74157					28.802	3.35	1.68791	1.50228				2.875	57.716	0.168487	25.8822
			8.38	4.635	0.241315	0.948985					0.88	8.894	0.0253409	1.82099					65.69	10.099	2.00271	1.53604				2	45.379	0.0609746	6.90209					28.265	3.184	1.65644	1.42784				2.568	70.186	0.150495	31.4743
			3.676	5.895	0.105856	1.20696					2.215	38.761	0.0637842	7.93606					55.23	9.946	1.68381	1.51277				2.41	30.868	0.0734744	4.69498					24.302	2.887	1.4242	1.29465				2.154	25.93	0.126233	11.6281
			26.343	5.614	0.758586	1.14943					1.812	35.529	0.0521793	7.27433					74.603	7.812	2.27444	1.18819				3.002	65.302	0.0915229	9.93235					26.983	3.291	1.58131	1.47582				2.785	40.49	0.163212	18.1574
			37.191	6.575	1.07097	1.34619					2.81	61.745	0.0809182	12.6419					68.035	7.907	2.0742	1.20264				2.396	50.699	0.0730476	7.71125					26.143	3.209	1.53209	1.43905				1.746	47.113	0.102323	21.1274
			16.78	5.379	0.483205	1.10131					0.742	7.614	0.021367	1.55892					74.7	9.045	2.2774	1.37573				3.248	13.634	0.0990227	2.07371					23.968	3.238	1.40462	1.45205				2.394	23.947	0.140298	10.7388
			30.165	6.555	0.868646	1.34209					1.929	18.9	0.0555484	3.86965					60.21	10.319	1.83564	1.56951				2.735	59.697	0.0833828	9.07983					24.012	2.819	1.4072	1.26416				2.973	64.414	0.17423	28.8859
			58.662	6.314	1.68926	1.29275					2.006	11.78	0.0577658	2.41188					32.968	9.236	1.00511	1.40478				2.669	40.889	0.0813706	6.21916					19.548	2.307	1.14559	1.03455				1.965	59.047	0.115157	26.4791
			1.941	6.082	0.055894	1.24525					2.317	29.666	0.0667215	6.07392					59.928	9.377	1.82704	1.42623				3.303	58.791	0.1007	8.94203					32.194	3.511	1.8867	1.57448				2.097	44.785	0.122893	20.0834
			29.94	6.485	0.862167	1.32776					1.94	15.725	0.0558652	3.21959					59.297	8.279	1.80781	1.25922				2.774	66.704	0.0845718	10.1456					19.255	3.059	1.12842	1.37178				2.286	50.697	0.133969	22.7346
			14.47	6.171	0.416685	1.26347					2.317	9.484	0.0667215	1.94179					58.571	8.336	1.78567	1.26789				2.739	53.758	0.0835047	8.17652					36.85	3.088	2.15956	1.38479				2.774	27.625	0.162568	12.3882
			10.958	5.284	0.315552	1.08186					2.74	56.042	0.0789024	11.4742					55.69	7.823	1.69784	1.18987				3.371	62.614	0.102773	9.52351					21.547	2.582	1.26274	1.15788				1.852	46.009	0.108535	20.6323
			4.759	5.079	0.137043	1.03989					2.786	57.936	0.080227	11.862					57.623	6.101	1.75677	0.927954				2.474	55.707	0.0754256	8.47296					28.718	2.465	1.68299	1.10541				2.999	26.745	0.175754	11.9936
			48.669	6.853	1.4015	1.40311					1.838	54.197	0.052928	11.0965					71.303	6.658	2.17384	1.01267				2.65	56.271	0.0807913	8.55874					29.932	4.028	1.75414	1.80632				2	57.927	0.117208	25.9769
			48.988	6.903	1.41068	1.41334					5.318	13.051	0.15314	2.67211					48.376	5.532	1.47485	0.84141				2.178	60.201	0.0664013	9.15649					26.864	3.229	1.57434	1.44802				2.961	68.545	0.173527	30.7384
			58.628	5.631	1.68828	1.15291					3.068	52.947	0.0883477	10.8405					71.267	8.073	2.17274	1.22789				2.337	64.107	0.0712488	9.75059					31.156	3.016	1.82587	1.3525				2.312	32.951	0.135493	14.7766
			66.517	6.077	1.91546	1.24423					2.109	47.411	0.0607318	9.70709					63.63	6.929	1.93991	1.05389				2.502	45.991	0.0762792	6.99517					24.251	3.565	1.42121	1.59869				2.449	69.642	0.143521	31.2303
			62.877	6.545	1.81064	1.34005					2.163	17.687	0.0622868	3.6213					57.165	6.661	1.74281	1.01313				2.158	32.294	0.0657916	4.91187					21.132	2.928	1.23842	1.31304				3.362	56.126	0.197027	25.1692
			57.248	6.007	1.64854	1.22989					53.329	5.036	1.53569	1.03109					53.797	6.685	1.64012	1.01678				2.662	57.16	0.0811572	8.69396					22.098	2.9	1.29503	1.30048				2.909	57.089	0.170479	25.6011
			58.698	6.009	1.6903	1.2303					56.292	5.09	1.62101	1.04214					64.678	8.653	1.97186	1.31611				2.021	23.046	0.0616148	3.50527					23.606	2.7	1.38341	1.21079				2.738	31.897	0.160458	14.3039
			50.261	6.29	1.44734	1.28784					2.518	34.769	0.0725096	7.11872					74.499	8.635	2.27127	1.31337				2.929	45.215	0.0892973	6.87714					30.091	3.712	1.76345	1.66461				1.971	33.919	0.115509	15.2107
			68.763	4.825	1.98013	0.987887					2.696	51.411	0.0776354	10.5261					58.453	8.204	1.78207	1.24782				1.788	22.997	0.0545113	3.49781					30.264	3.526	1.77359	1.5812				2.65	33.155	0.155301	14.8681
			24.108	6.48	0.694226	1.32674					35.208	5.067	1.01387	1.03743					48.31	9.049	1.47284	1.37634				2.296	61.221	0.0699988	9.31163					0.502	1.996	0.0294192	0.895089				2.533	60.119	0.148444	26.9598
			63.879	5.513	1.83949	1.12875					3.23	19.302	0.0930127	3.95196					75.288	7.851	2.29533	1.19413				2.439	47.084	0.0743585	7.16141					26.392	3.164	1.54668	1.41887				2.38	33.509	0.139478	15.0268
			25.883	4.882	0.74534	0.999557					2.138	45.726	0.0615669	9.36209					31.976	8.271	0.974862	1.25801				2.293	46.72	0.0699074	7.10605					37.042	3.625	2.17081	1.6256				2.934	59.922	0.171944	26.8715
			58.145	6.265	1.67437	1.28272					2.597	66.046	0.0747845	13.5225					68.214	7.462	2.07966	1.13496				2.208	60.793	0.0673159	9.24653					27.982	3.337	1.63986	1.49645				2.831	58.912	0.165908	26.4186
			47.791	5.41	1.37621	1.10766					2.548	47.506	0.0733735	9.72654					1.865	4.603	0.0568588	0.70011				2.616	62.524	0.0797548	9.50982					26.542	3.189	1.55547	1.43008				1.954	53.298	0.114512	23.901
			35.887	5.225	1.03342	1.06978					3.083	19.024	0.0887796	3.89504					67.339	7.966	2.05298	1.21162				2.072	25.182	0.0631697	3.83015					27.609	3.077	1.618	1.37985				2.27	27.269	0.133031	12.2285
			61.125	4.947	1.76019	1.01287					2.541	38.14	0.0731719	7.80891					66.8	10.255	2.03655	1.55977				2.79	51.075	0.0850596	7.76844					28.381	3.278	1.66324	1.46999				2.021	61.014	0.118439	27.3612
			64.13	6.644	1.84672	1.36031					0.759	5.128	0.0218565	1.04992					60.288	8.982	1.83802	1.36615				2.637	52.255	0.080395	7.94792					32.628	3.646	1.91213	1.63502				2.174	47.038	0.127405	21.0938
			48.362	5.609	1.39266	1.14841					23.619	4.582	0.680145	0.938134					76.253	8.277	2.32475	1.25892				1.975	33.862	0.0602124	5.15037					36.454	3.033	2.13635	1.36012				2.16	50.158	0.126585	22.4929
			36.073	5.131	1.03878	1.05054					2.546	36.502	0.0733159	7.47354					1.002	9.534	0.0305483	1.45011				3.003	45.458	0.0915533	6.9141					23.135	3.173	1.3558	1.4229				2.003	56.685	0.117384	25.4199
			44.607	5.888	1.28453	1.20553					2.342	33.982	0.0674414	6.95759					70.546	7.774	2.15076	1.18242				3.986	35.737	0.121522	5.43555					22.37	3.206	1.31097	1.4377				2.289	36.274	0.134145	16.2668
			28.976	5.642	0.834407	1.15516					2.325	46.706	0.0669519	9.56274					75.18	8.711	2.29203	1.32493				3.268	58.534	0.0996325	8.90294					34.955	3.665	2.0485	1.64354				2.187	49.885	0.128167	22.3705
			36.992	5.571	1.06524	1.14063					10.547	37.374	0.303717	7.65208					60.466	9.421	1.84344	1.43292				1.279	12.254	0.0389932	1.86382					32.644	3.302	1.91307	1.48075				2.162	63.561	0.126702	28.5034
			33.975	5.72	0.978361	1.17113					3.274	64.887	0.0942797	13.2852					67.769	6.905	2.06609	1.05024				1.944	22.195	0.0592673	3.37583					30.802	3.021	1.80512	1.35474				2.346	70.299	0.137485	31.525
			31.957	5.072	0.92025	1.03846					1.555	50.703	0.0447786	10.3811					46.425	7.294	1.41537	1.10941				0.79	4.655	0.024085	0.708019					38.877	3.479	2.27835	1.56013				2.457	40.014	0.14399	17.9439
			33.79	6.013	0.973034	1.23112					1.897	7.787	0.054627	1.59434					69.487	9.021	2.11847	1.37208				1.692	14.722	0.0515845	2.2392					29.804	3.13	1.74663	1.40362				2.449	51.73	0.143521	23.1979
			65.125	6.493	1.87537	1.3294					0.973	4.411	0.028019	0.903123					79.382	8.678	2.42014	1.31991				3.287	48.315	0.100212	7.34865					32.158	3.821	1.88459	1.71349				1.912	66.619	0.112051	29.8747
			30.584	5.086	0.880712	1.04132					1.93	37.227	0.0555772	7.62198					100.325	7.841	3.05864	1.19261				2.807	47.786	0.0855778	7.26819					35.896	3.857	2.10365	1.72964				2.066	31.825	0.121076	14.2716
			37.723	5.725	1.08629	1.17216					3.003	53.999	0.0864759	11.0559					86.849	8.794	2.64779	1.33756				1.393	35.435	0.0424688	5.38962					35.057	3.602	2.05448	1.61529				2.201	30.594	0.128987	13.7196
			74.368	5.443	2.14154	1.11442					0.267	0.418	0.00768867	0.0855827					89.282	10.231	2.72197	1.55612				2.025	49.274	0.0617368	7.49451					26.881	3.4	1.57534	1.5247				1.974	31.248	0.115684	14.0129
			34.702	5.703	0.999296	1.16765					2.31	47.925	0.0665199	9.81233					69.16	9.334	2.1085	1.41969				2.293	33.372	0.0699074	5.07584					24.28	3.105	1.42291	1.39241				2.47	27.163	0.144752	12.181
			38.711	5.546	1.11474	1.13551					1.853	47.461	0.0533599	9.71732					66.697	9.313	2.03341	1.41649				2.153	31.63	0.0656391	4.81088					33.948	3.649	1.98949	1.63636				3.142	60.254	0.184134	27.0204
			20.21	5.109	0.581977	1.04603					1.685	68.068	0.0485221	13.9365					62.195	10.126	1.89616	1.54015				2.527	63.117	0.0770414	9.60001					30.553	3.762	1.79053	1.68704				2.122	32.563	0.124358	14.6026
			31.72	4.714	0.913425	0.96516					2.257	66.169	0.0649937	13.5477					56.526	9.501	1.72332	1.44509				1.69	20.371	0.0515235	3.0984					6.766	1.471	0.396515	0.659657				2.401	53.736	0.140708	24.0974
			47.611	6.049	1.37103	1.23849					1.475	42.912	0.0424748	8.78595					70.62	11.348	2.15301	1.72602				2.343	37.742	0.0714317	5.74051					8.717	2.89	0.510851	1.296				1.83	54.384	0.107245	24.388
			18.716	5.971	0.538955	1.22252					1.569	25.774	0.0451817	5.27706					68.146	10.055	2.07759	1.52935				2.677	46.009	0.0816145	6.99791					30.347	3.837	1.77846	1.72067				2.79	49.115	0.163505	22.0252
			25.388	5.497	0.731086	1.12547					19.198	29.425	0.552835	6.02457					64.977	10.211	1.98097	1.55308				2.453	52.579	0.0747853	7.9972					9.086	3.237	0.532476	1.4516				2.228	69.365	0.13057	31.1061
			43.39	5.273	1.24948	1.07961					2.207	41.573	0.0635539	8.5118					1.201	3.704	0.0366152	0.563373				2.192	41.998	0.0668281	6.38784					9.765	3.127	0.572268	1.40228				2.435	62.297	0.142701	27.9365
			27.085	5.046	0.779953	1.03313					2.04	28.53	0.0587449	5.84133					1.29	4.116	0.0393286	0.626038				1.429	29.883	0.0435663	4.54516					22.454	3.642	1.3159	1.63322				2.722	62.554	0.15952	28.0518
			27.702	7.154	0.797721	1.46473					2.045	35.16	0.0588888	7.19878					1.184	5.216	0.036097	0.793347				1.83	60.598	0.0557917	9.21687					32.469	4.086	1.90281	1.83233				2.976	24.067	0.174406	10.7926
			25.2	5.007	0.725672	1.02515					1.764	56.67	0.050797	11.6028					37.388	11.308	1.13986	1.71993				1.942	46.671	0.0592063	7.0986					16.413	2.978	0.961868	1.33546				1.83	44.02	0.107245	19.7404
			44.377	5.283	1.2779	1.08166					2.245	57.435	0.0646481	11.7594					34.737	11.333	1.05904	1.72373				1.873	29.949	0.0571027	4.5552					27.397	4.295	1.60557	1.92606				2.496	58.053	0.146276	26.0334
			19.001	5.358	0.547162	1.09701					2.04	28.964	0.0587449	5.93019					55.234	11.567	1.68394	1.75933				2.467	11.745	0.0752122	1.7864					30.541	3.99	1.78983	1.78928				1.506	40.701	0.0882577	18.252
			46.344	5.543	1.33454	1.13489					2.082	56.318	0.0599543	11.5307					8.618	12.042	0.26274	1.83157				2.119	17.907	0.0646026	2.72363					16.864	2.718	0.988298	1.21886				2.629	56.494	0.15407	25.3342
			16.953	4.904	0.488187	1.00406					2.089	29.629	0.0601559	6.06634					10.871	11.864	0.331427	1.8045				1.895	24.288	0.0577734	3.69417					14.341	3.697	0.84044	1.65789				1.744	41.415	0.102205	18.5722
			41.124	4.566	1.18423	0.934858					2.009	57.845	0.0578522	11.8434					9.911	5.301	0.30216	0.806275				2.494	32.548	0.0760353	4.95051					37.841	4.058	2.21764	1.81977				2.643	42.717	0.15489	19.1561
			30.161	5.225	0.868531	1.06978					1.842	46.809	0.0530432	9.58383					45.318	11.476	1.38162	1.74548				2.314	48.413	0.0705476	7.36355					18.282	3.539	1.0714	1.58703				2.874	47.955	0.168428	21.505
			1.057	3.074	0.0304379	0.629381					1.813	12.137	0.0522081	2.48497					43.049	9.007	1.31245	1.36995				2.633	42.243	0.080273	6.4251					21.938	2.803	1.28566	1.25698				3.337	60.392	0.195562	27.0823
			25.501	4.707	0.73434	0.963727					2.667	53.51	0.0768003	10.9558					1.477	16.502	0.0450297	2.50993				2.781	51.19	0.0847852	7.78593					11.902	4.104	0.697505	1.8404				2.3	47.872	0.134789	21.4678
			17.392	4.058	0.500829	0.830849					49.536	7.428	1.42646	1.52083					57.238	9.253	1.74503	1.40737				2.897	52.688	0.0883217	8.01377					23.072	3.226	1.35211	1.44667				2.223	54.198	0.130277	24.3046
			25.551	6.941	0.735779	1.42112					2.172	53.709	0.062546	10.9966					65.025	9.87	1.98244	1.50121				2.516	59.084	0.076706	8.9866					32.654	4.364	1.91366	1.957				2.894	50.218	0.1696	22.5198
			1.18	3.747	0.0339799	0.767173					2.488	54.648	0.0716457	11.1888					41.621	12.086	1.26891	1.83826				1.974	21.842	0.0601819	3.32214					28.283	3.297	1.6575	1.47851				2.277	70.455	0.133441	31.5949
			34.605	4.425	0.996503	0.905989					48.784	6.391	1.40481	1.30851					38.608	11.559	1.17705	1.75811				2.8	52.852	0.0853644	8.03872					14.42	4.641	0.84507	2.08122				2.751	55.586	0.16122	24.9271
			35.221	5.002	1.01424	1.02413					2.215	56.742	0.0637842	11.6175					48.548	9.48	1.4801	1.4419				3.489	33.938	0.10637	5.16192					19.25	3.896	1.12813	1.74713				2.407	61.016	0.14106	27.3621
			24.641	5.367	0.709575	1.09886					2.924	22.465	0.084201	4.59956					64.24	9.364	1.9585	1.42425				3.115	40.73	0.0949679	6.19498					0.627	1.989	0.0367447	0.89195				2.27	63.72	0.133031	28.5747
			36.665	4.755	1.05582	0.973555					1.839	20.245	0.0529568	4.14503					72.927	10.4	2.22335	1.58183				3.104	55.046	0.0946326	8.37242					23.013	2.899	1.34865	1.30003				2.31	51.693	0.135375	23.1813
			37.876	5.583	1.0907	1.14308					1.655	13.774	0.0476582	2.82014					58.604	11.158	1.78668	1.69712				3.404	34.957	0.103779	5.31691					29.721	3.11	1.74177	1.39465				2.387	65.515	0.139888	29.3796
			27.17	5.199	0.782401	1.06446					3.587	22.3	0.103293	4.56578					6.319	3.757	0.192649	0.571435				2.532	67.164	0.0771938	10.2156					31.457	3.215	1.84351	1.44174				2.616	65.69	0.153308	29.4581
			47.077	4.914	1.35565	1.00611					1.946	29.395	0.056038	6.01843					48.638	10.602	1.48284	1.61255				3.684	16.872	0.112315	2.56621					19.602	3.15	1.14876	1.41259				3.022	31.887	0.177101	14.2994
			34.126	6.207	0.982709	1.27084					2.967	50.19	0.0854392	10.2761					3.282	6.145	0.100059	0.934646				3.114	40.509	0.0949374	6.16136					18.635	4.073	1.09209	1.8265				2.097	57.706	0.122893	25.8777
			33.584	5.409	0.967102	1.10746					3.144	60.912	0.0905362	12.4713					18.684	9.684	0.569625	1.47292				3.167	52.272	0.0965533	7.9505					33.652	3.358	1.97214	1.50587				5.338	60.941	0.312828	27.3285
			19.08	6.55	0.549437	1.34107					1.485	7.439	0.0427628	1.52309					1.781	7.072	0.0542979	1.07564				3.892	45.982	0.118657	6.9938					30.058	3.607	1.76152	1.61753				3.268	59.867	0.191518	26.8468
			21.99	4.774	0.633235	0.977445					1.677	43.284	0.0482917	8.86211					30.465	10.61	0.928795	1.61377				2.832	21.634	0.08634	3.2905					33.081	3.846	1.93868	1.7247				3.282	48.495	0.192338	21.7472
			28.751	4.688	0.827928	0.959837					2.056	36.029	0.0592056	7.3767					29.501	8.06	0.899406	1.22592				2.517	51.098	0.0767365	7.77194					32.405	3.312	1.89906	1.48524				2.22	53.055	0.130101	23.792
			64.784	4.286	1.86555	0.87753					2.8	52.565	0.0806302	10.7623					4.352	9.312	0.132681	1.41634				2.882	34.388	0.0878644	5.23037					28.253	3.203	1.65574	1.43636				1.892	50.839	0.110879	22.7983
			43.083	7.105	1.24064	1.4547					8.422	16.348	0.242524	3.34714					5.109	9.529	0.15576	1.44935				2.21	43.022	0.0673769	6.54359					30.47	3.219	1.78566	1.44353				1.866	19.566	0.109355	8.7742
			32.859	4.749	0.946224	0.972326					1.669	43.333	0.0480614	8.87214					5.314	7.313	0.162009	1.1123				3.645	5.647	0.111126	0.858901					35.07	3.853	2.05524	1.72784				2.101	48.989	0.123127	21.9687
			13.531	5.536	0.389645	1.13346					2.395	28.009	0.0689676	5.73466					0.683	4.568	0.0208228	0.694787				6.667	16.84	0.203259	2.56134					7.242	3.488	0.42441	1.56416				3.664	53.643	0.214725	24.0557
			18.998	4.54	0.547076	0.929535					2.808	41.826	0.0808606	8.5636					20.071	2.884	0.61191	0.438653				4.227	50.522	0.12887	7.68433					12.001	5.008	0.703307	2.24579				4.344	52.135	0.254576	23.3795
			36.34	4.769	1.04646	0.976421					1.814	21.313	0.0522369	4.3637					1.757	4.604	0.0535662	0.700262				2.56	53.974	0.0780475	8.20937					33.329	3.306	1.95321	1.48255				2.772	72.965	0.16245	32.7205
			23.952	4.506	0.689734	0.922574					2.447	38.561	0.070465	7.89511					1.521	5.916	0.0463712	0.899816				4.868	19.812	0.148412	3.01338					31.434	3.216	1.84216	1.44219				3.011	61.262	0.176457	27.4724
			39.764	4.851	1.14506	0.99321					2.473	37.953	0.0712137	7.77062					17.485	9	0.53307	1.36889				1.509	16.045	0.0460053	2.44042					33.565	3.507	1.96704	1.57268				2.007	43.067	0.117618	19.313
			40.613	5.166	1.16951	1.0577					2.363	39.495	0.0680461	8.08634					8.21	8.411	0.250301	1.2793				3.298	66.598	0.100547	10.1295					30.419	3.321	1.78268	1.48927				1.942	49.885	0.113809	22.3705
			49.221	5.533	1.41739	1.13285					0.705	5.701	0.0203015	1.16724					12.295	5.404	0.374841	0.821941				1.946	14.682	0.0593283	2.23311					15.197	2.788	0.890606	1.25025				2.791	45.024	0.163564	20.1906
			27.472	5.284	0.791097	1.08186					1.966	36.303	0.0566139	7.4328					22.685	7.401	0.691604	1.12568				2.284	18.965	0.069633	2.88455					1.503	4.752	0.0880819	2.13099				3.062	62.919	0.179446	28.2155
			27.701	4.314	0.797692	0.883263					2.072	42.216	0.0596663	8.64345					6.309	8.663	0.192344	1.31763				2.976	39.47	0.0907302	6.00333					26.965	4.798	1.58026	2.15162				2.248	41.156	0.131742	18.456
			31.623	4.398	0.910632	0.900461					2.238	38.567	0.0644466	7.89634					7.755	9.594	0.236429	1.45923				3.839	54.306	0.117041	8.25987					28.277	4.607	1.65715	2.06597				3.145	52.523	0.18431	23.5535
			42.315	6.883	1.21852	1.40925					0.68	6.004	0.0195816	1.22928					40.682	9.421	1.24028	1.43292				1.957	26.939	0.0596636	4.09739					15.488	2.663	0.907659	1.1942				1.883	50.855	0.110351	22.8055
			10.806	8.451	0.311175	1.73029					0.963	10.143	0.027731	2.07671					34.317	10.15	1.04623	1.5438				2.944	64.69	0.0897546	9.83926					23.26	2.008	1.36313	0.90047				2.27	58.367	0.133031	26.1742
			29.653	4.733	0.853903	0.96905					2.351	49.93	0.0677006	10.2228					1.581	5.956	0.0482004	0.9059				1.731	5.99	0.0527735	0.911071					14.177	1.555	0.830829	0.697326				4.307	3.138	0.252408	1.40721
			37.07	5.96	1.06749	1.22027					2.584	39.664	0.0744102	8.12094					16.774	10.035	0.511394	1.52631				0.78	3.692	0.0237801	0.561548					11.023	1.115	0.645992	0.500012				3.097	52.316	0.181497	23.4607
			29.453	5.87	0.848143	1.20184					1.502	24.426	0.0432523	5.00106					6.48	8.619	0.197558	1.31094				3.364	31.473	0.102559	4.787					8.906	1.144	0.521928	0.513017				2.204	65.045	0.129163	29.1689
			19.556	4.053	0.563144	0.829825					1.414	22.511	0.0407183	4.60898					7.488	9.65	0.228289	1.46775				3.818	17.334	0.1164	2.63648					8.276	1.052	0.485007	0.47176				2.251	59.45	0.131918	26.6598
			30.946	4.662	0.891136	0.954514					1.801	23.431	0.0518625	4.79734					12.691	6.969	0.386914	1.05998				1.8	39.49	0.0548771	6.00638					12.419	1.005	0.727804	0.450683				2.056	53.131	0.12049	23.8261
			16.48	4.882	0.474566	0.999557					2.31	49.531	0.0665199	10.1411					12.368	8.518	0.377067	1.29558				2.796	46.523	0.0852425	7.07609					13.825	1.287	0.810201	0.577144				1.815	48.592	0.106366	21.7907
			30.055	3.944	0.865479	0.807508					1.539	30.788	0.0443178	6.30364					62.682	8.093	1.911	1.23093				2.642	25.394	0.0805474	3.86239					12.617	1.522	0.739407	0.682528				2.885	47.007	0.169073	21.0799
			31.396	5.299	0.904095	1.08494					1.796	42.172	0.0517185	8.63444					7.386	8.441	0.225179	1.28386				2.629	36.734	0.0801511	5.58719					13.637	1.063	0.799183	0.476693				2.219	32.687	0.130042	14.6582
			43.157	3.859	1.24277	0.790105					2.381	58.012	0.0685645	11.8776					22.848	10.215	0.696574	1.55369				3.017	26.269	0.0919802	3.99548					14.137	1.343	0.828485	0.602257				41.889	7.493	2.45486	3.36017
			55.493	4.538	1.598	0.929125					1.309	18.304	0.0376946	3.74762					12.131	8.762	0.369841	1.33269				2.817	52.807	0.0858827	8.03187					19.483	1.872	1.14178	0.839482				2.401	59.647	0.140708	26.7482
			37.973	4.158	1.09349	0.851323					2.141	34.945	0.0616533	7.15476					24.892	7.719	0.75889	1.17405				2.262	25.572	0.0689623	3.88947					15.485	1.123	0.907484	0.5036				2.254	52.816	0.132093	23.6849
			33.45	4.145	0.963243	0.848661					1.413	11.824	0.0406895	2.42089					2.711	8.677	0.0826511	1.31976				2.64	49.716	0.0804865	7.56174					15.144	1.124	0.8875	0.504048				3.015	60.487	0.176691	27.1249
			38.86	4.7	1.11903	0.962294					0.76	6.642	0.0218853	1.35991					18.349	8.928	0.559411	1.35794				1.717	23.227	0.0523467	3.5328					14.336	1.602	0.840147	0.718403				1.444	53.795	0.0846242	24.1239
			36.315	4.519	1.04574	0.925235					2.449	36.853	0.0705226	7.54541					7.255	8.361	0.221185	1.2717				2.531	31.559	0.0771633	4.80008					17.951	1.702	1.052	0.763247				2.899	73.229	0.169893	32.8389
			36.812	4.297	1.06006	0.879782					1.132	9.774	0.0325976	2.00116					18.685	8.113	0.569655	1.23398				2.414	28.664	0.0735963	4.35976					2.515	1.962	0.147389	0.879842				2.506	65.755	0.146862	29.4873
			29.983	4.68	0.863405	0.958199					1.378	41.666	0.0396816	8.53084					19.084	8.524	0.58182	1.29649				1.709	27.893	0.0521028	4.24249					7.149	1.219	0.41896	0.54665				2.205	25.574	0.129222	11.4684
			32.562	4.228	0.937672	0.865655					0.695	6.665	0.0200136	1.36461					22.267	10.612	0.678861	1.61407				3.344	54.194	0.10195	8.24284					20.317	3.025	1.19066	1.35653				23.339	8.394	1.36776	3.76422
			17.886	3.875	0.515054	0.793381					2.198	41.469	0.0632947	8.4905					21.267	9.653	0.648373	1.46821				2.769	26.295	0.0844193	3.99943					13.921	1.351	0.815827	0.605844				1.979	46.857	0.115977	21.0126
			36.093	5.232	1.03935	1.07122					2.606	49.297	0.0750437	10.0932					16.066	8.402	0.489809	1.27793				1.657	14.949	0.0505174	2.27372					12.059	1.06	0.706706	0.475348				1.954	61.98	0.114512	27.7944
			36.455	4.126	1.04978	0.844771					2.211	43.238	0.0636691	8.85269					27.997	8.89	0.853553	1.35216				2.56	39.794	0.0780475	6.05261					21.117	1.414	1.23754	0.634096				2.134	52.693	0.125061	23.6297
			36.008	6.179	1.0369	1.26511					1.682	34.977	0.0484357	7.16131					47.077	10.048	1.43525	1.52829				10.636	20.615	0.324263	3.13551					25.924	2.013	1.51925	0.902712				1.683	31.828	0.0986306	14.273
			22.123	4.411	0.637065	0.903123					3.665	21.759	0.105539	4.45501					17.329	8.222	0.528314	1.25056				3.082	62.185	0.0939618	9.45826					9.542	1.042	0.5592	0.467276				2.606	53.062	0.152722	23.7952
			27.117	4.107	0.780875	0.840881					2.144	37.016	0.0617397	7.57878					19.847	9.505	0.605081	1.4457				2.776	34.928	0.0846327	5.3125					11.554	1.116	0.677111	0.50046				1.926	48.112	0.112871	21.5754
			17.811	4.154	0.512894	0.850504					1.318	22.078	0.0379538	4.52032					8.393	8.881	0.25588	1.35079				3.201	25.89	0.0975898	3.93783					10.366	0.983	0.607489	0.440818				2.316	51.048	0.135727	22.892
			30.608	4.412	0.881403	0.903328					3.47	20.99	0.0999239	4.29756					53.524	8.796	1.6318	1.33786				2.793	27.123	0.085151	4.12537					14.873	1.313	0.871618	0.588803				2.218	65.977	0.129984	29.5868
			38.11	4.247	1.09743	0.869545					2.211	42.078	0.0636691	8.61519					5.208	9.14	0.158778	1.39018				2.82	13.769	0.0859742	2.09425					12.581	1.77	0.737297	0.793741				2.206	24.034	0.129281	10.7778
			23.246	5.265	0.669403	1.07797					4.096	61	0.11795	12.4893					13.618	10.469	0.415176	1.59232				2.614	27.696	0.0796938	4.21252					6.72	1.007	0.393819	0.45158				2.322	58.85	0.136079	26.3908
			24.821	4.454	0.714758	0.911927					1.669	45.479	0.0480614	9.31152					20.559	9.845	0.626788	1.49741				3.7	21.416	0.112803	3.25735					22.833	1.056	1.33811	0.473554				2.636	65.418	0.15448	29.3361
			30.431	4.371	0.876306	0.894933					1.976	36.863	0.0569019	7.54745					49.168	9.093	1.499	1.38303				2.256	43.464	0.0687793	6.61082					1.364	2.167	0.0799359	0.971772				2.159	74.073	0.126526	33.2174
			54.881	6.737	1.58038	1.37936					0.806	7.211	0.02321	1.4764					21.947	8.991	0.669105	1.36752				2.443	36.089	0.0744805	5.48909					11.207	1.131	0.656775	0.507187				2.538	58.619	0.148737	26.2872
			36.266	4.357	1.04433	0.892067					2.087	38.894	0.0600983	7.96329					43.241	9.233	1.3183	1.40433				2.09	40.575	0.0637184	6.1714					8.247	1.056	0.483307	0.473554				1.779	34.893	0.104257	15.6475
			25.02	5.616	0.720488	1.14984					3.368	42.469	0.0969866	8.69525					18.938	7.943	0.577368	1.20812				1.854	52.584	0.0565234	7.99796					9.719	1.017	0.569573	0.456065				2.089	60.52	0.122424	27.1397
			26.011	4.648	0.749026	0.951647					1.587	46.297	0.0457	9.479					6.039	9.357	0.184113	1.42319				1.737	31.92	0.0529564	4.85499					18.446	1.298	1.08101	0.582077				2.278	67.623	0.1335	30.3249
			25.612	5.964	0.737536	1.22109					2.352	43.427	0.0677294	8.89139					4.796	9.145	0.146217	1.39094				12.531	19.342	0.382036	2.94189					15.606	1.93	0.914575	0.865492				1.881	51.508	0.110234	23.0983
			16.747	4.21	0.482255	0.86197					2.393	47.74	0.06891	9.77445					27.499	9.508	0.83837	1.44615				2.438	26.229	0.074328	3.9894					19.682	2.428	1.15344	1.08882				2.398	57.845	0.140532	25.9401
			19.681	5.121	0.566744	1.04849					1.899	40.061	0.0546846	8.20222					71.647	9.347	2.18432	1.42167				2.26	11.46	0.0689013	1.74305					17.403	1.211	1.01989	0.543062				2.297	50.732	0.134613	22.7503
			18.497	4.506	0.532649	0.922574					2.462	24.147	0.070897	4.94394					21.314	7.79	0.649806	1.18485				3.176	21.155	0.0968276	3.21765					19.815	2.036	1.16124	0.913026				2.204	50.215	0.129163	22.5185
			57.025	6.241	1.64212	1.2778					2.631	19.324	0.0757636	3.95646					40.016	9.881	1.21998	1.50289				35.67	7.72	1.08748	1.1742					26.386	1.799	1.54633	0.806746				1.922	38.128	0.112637	17.0982
			24.77	4.379	0.713289	0.896571					2.771	21.568	0.0797951	4.4159					14.217	8.879	0.433438	1.35048				3.165	41.573	0.0964923	6.3232					18.35	1.815	1.07538	0.813921				2.14	36.512	0.125413	16.3735
			45.494	4.566	1.31007	0.934858					3.262	49.142	0.0939342	10.0615					11.295	7.875	0.344354	1.19778				2.936	11.96	0.0895107	1.8191					6.124	1.238	0.358891	0.55517				1.613	37.484	0.0945283	16.8094
			48.965	6.503	1.41002	1.33145					1.478	38.052	0.0425612	7.79089					10.873	10.365	0.331488	1.5765				2.809	32.56	0.0856388	4.95233					14.955	1.101	0.876423	0.493734				2.717	32.766	0.159227	14.6936
			46.723	4.665	1.34546	0.955128					2.052	22.75	0.0590904	4.65791					39.878	9.125	1.21577	1.3879				2.43	26.902	0.0740841	4.09176					12.849	1.075	0.753003	0.482074				1.482	38.312	0.0868512	17.1807
			38.96	7.053	1.12191	1.44405					2.105	47.091	0.0606166	9.64157					42.534	8.781	1.29675	1.33558				1.818	28.646	0.0554259	4.35702					21.2	1.322	1.24241	0.592839				1.947	54.443	0.114102	24.4145
			8.74	4.819	0.251681	0.986658					2.782	30.228	0.0801119	6.18898					1.711	5.749	0.0521638	0.874415				1.959	64.349	0.0597246	9.7874					8.419	1.144	0.493387	0.513017				2.096	21.399	0.122834	9.59619
			22.187	4.303	0.638908	0.881011					3.01	32.558	0.0866775	6.66603					20.786	9.174	0.633709	1.39535				1.927	70.587	0.058749	10.7362					12.793	1.508	0.749721	0.676249				2.309	39.564	0.135317	17.7421
			22.462	4.308	0.646827	0.882034					2.398	29.537	0.069054	6.0475					16.249	7.136	0.495388	1.08538				1.95	69.45	0.0594502	10.5633					11.699	1.782	0.685609	0.799122				1.981	53.237	0.116095	23.8737
			34.511	5.63	0.993796	1.15271					2.222	36.374	0.0639858	7.44733					62.125	9.603	1.89402	1.4606				0.891	7.19	0.0271642	1.09359					8.947	1.119	0.52433	0.501806				3.236	64.371	0.189643	28.8666
			22.679	4.662	0.653076	0.954514					2.503	36.568	0.0720776	7.48706					36.763	8.523	1.1208	1.29634				2.799	55.363	0.0853339	8.42064					19.446	1.193	1.13961	0.53499				1.637	46.307	0.0959348	20.766
			1.386	4.046	0.0399119	0.828392					2.917	32.772	0.0839994	6.70985					14.335	6.499	0.437035	0.988489				2.615	64.025	0.0797243	9.73812					11.451	1.025	0.671075	0.459652				2.127	18.079	0.124651	8.10737
			26.43	4.284	0.761091	0.877121					2.019	44.842	0.0581401	9.1811					3.709	8.446	0.113077	1.28463				0.993	11.372	0.0302739	1.72967					8.55	1.319	0.501065	0.591494				2.643	58.801	0.15489	26.3688
			17.205	4.753	0.495444	0.973145					2.043	38.891	0.0588312	7.96267					35.431	7.945	1.0802	1.20842				2.973	39.894	0.0906387	6.06782					11.569	1.124	0.67799	0.504048				2.205	24.503	0.129222	10.9882
			23.519	5.889	0.677265	1.20573					1.682	37.305	0.0484357	7.63795					15.901	6.675	0.484778	1.01526				0.959	5.855	0.0292373	0.890538					18.375	1.412	1.07685	0.633199				2.398	45.908	0.140532	20.587
			23.502	4.509	0.676775	0.923188					2.494	52.554	0.0718185	10.7601					19.594	7.258	0.597368	1.10393				0.743	12.969	0.0226521	1.97257					16.91	2.348	0.990994	1.05294				2.077	51.2	0.121721	22.9602
			56.095	6.785	1.61534	1.38918					2.229	49.637	0.0641874	10.1628					21.117	8.438	0.6438	1.28341				1.254	6.448	0.0382311	0.980732					6.859	1.258	0.401965	0.564139				2.567	58.273	0.150437	26.132
			29.113	4.399	0.838353	0.900666					1.828	18.833	0.05264	3.85593					14.014	9.853	0.427249	1.49863				1.97	75.169	0.06006	11.4331					10.694	1.991	0.626712	0.892847				1.946	45.001	0.114043	20.1803
			54.014	3.628	1.55541	0.742809					1.984	57.885	0.0571323	11.8516					66.238	10.359	2.01942	1.57559				2.576	50.14	0.0785353	7.62623					15.316	2.064	0.897579	0.925583				2.116	51.231	0.124006	22.9741
			22.612	4.849	0.651146	0.992801					1.781	32.812	0.0512866	6.71804					28.659	8.24	0.873735	1.25329				2.23	23.604	0.0679867	3.59014					8.79	1.222	0.515129	0.547995				2.198	37.216	0.128812	16.6892
			45.579	6.437	1.31252	1.31793					1.018	12.969	0.0293148	2.65532					12.06	5.559	0.367677	0.845516				3.321	48.657	0.101248	7.40066					16.589	2.773	0.972182	1.24353				1.897	57.182	0.111172	25.6428
			23.439	4.443	0.674961	0.909675					2.541	46.506	0.0731719	9.52179					38.962	8.442	1.18785	1.28402				2.708	45.938	0.0825596	6.98711					19.375	1.343	1.13545	0.602257				1.837	22.558	0.107656	10.1159
			39.571	4.253	1.13951	0.870774					2.059	35.211	0.059292	7.20922					48.049	9.02	1.46488	1.37193				2.164	22.457	0.0659745	3.41568					24.298	2.085	1.42396	0.935				2.628	61.717	0.154011	27.6764
			29.412	5.257	0.846963	1.07634					1.751	49.045	0.0504227	10.0416					21.647	7.364	0.659958	1.12005				0.904	4.339	0.0275605	0.659956					7.797	1.274	0.456936	0.571314				2.42	67.272	0.141822	30.1675
			26.767	4.659	0.770796	0.953899					1.283	26.708	0.0369459	5.46829					2.677	8.653	0.0816145	1.31611				2.122	82.859	0.064694	12.6027					11.979	1.68	0.702018	0.753381				1.994	64.84	0.116856	29.0769
			29.111	4.201	0.838295	0.860127					1.751	44.011	0.0504227	9.01096					44.415	7.765	1.35409	1.18105				2.411	37.073	0.0735049	5.63875					21.215	1.531	1.24328	0.686564				3.523	43.957	0.206462	19.7121
			27.77	4.13	0.799679	0.84559					2.648	54.997	0.0762531	11.2603					1.247	7.012	0.0380177	1.06652				2.344	59.958	0.0714622	9.11953					14.801	2.115	0.867398	0.948453				2.273	60.749	0.133207	27.2424
			39.343	6.425	1.13294	1.31548					2.148	33.408	0.0618549	6.84007					22.166	10.589	0.675781	1.61057				0.768	4.186	0.0234142	0.636685					19.007	1.89	1.11389	0.847554				2.255	59.95	0.132152	26.8841
			21.784	4.154	0.627303	0.850504					0.804	6.815	0.0231524	1.39533					64.729	11.388	1.97341	1.7321				2.942	47.699	0.0896936	7.25495					11.56	1.434	0.677463	0.643065				2.34	49.201	0.137133	22.0638
			18.962	4.767	0.546039	0.976012					2.237	53.221	0.0644178	10.8966					27.555	7.457	0.840077	1.1342				2.22	55.148	0.0676818	8.38794					8.519	1.509	0.499248	0.676698				2.221	48.219	0.13016	21.6234
			16.233	3.751	0.467454	0.767992					3.147	45.797	0.0906226	9.37663					43.442	8.145	1.32443	1.23884				2.206	46.11	0.067255	7.01327					22.011	2.514	1.28993	1.12738				50.301	5.027	2.94784	2.25431
			43.142	4.261	1.24234	0.872411					3.175	24.63	0.0914289	5.04283					37.229	8.848	1.13501	1.34577				2.812	33.923	0.0857303	5.15964					18.223	2.051	1.06794	0.919753				1.99	44.474	0.116622	19.944
			31.352	4.405	0.902828	0.901895					2.784	54.169	0.0801695	11.0907					31.102	7.759	0.948216	1.18013				0.832	9.39	0.0253654	1.42821					12.641	1.393	0.740814	0.624679				40.563	5.738	2.37716	2.57316
			29.803	4.822	0.858222	0.987272					3.521	34.29	0.101392	7.02065					68.695	8.626	2.09432	1.312				2.369	47.424	0.0722244	7.21313					11.669	1.622	0.68385	0.727372				2.373	58.841	0.139067	26.3867
			19.242	4.868	0.554102	0.996691					1.782	33.43	0.0513154	6.84457					25.452	8.069	0.775963	1.22728				2.496	44.861	0.0760963	6.8233					15.998	1.567	0.937547	0.702707				2.945	38.378	0.172589	17.2103
			41.139	3.906	1.18466	0.799728					1.754	56.782	0.0505091	11.6257					1.221	7.456	0.037225	1.13405				1.099	6.379	0.0335055	0.970237					15.517	2.195	0.909359	0.984329				3.016	66.408	0.17675	29.7801
			36.946	3.38	1.06392	0.692033					2.108	48.687	0.060703	9.96834					19.051	7.928	0.580813	1.20584				3.048	62.796	0.0929253	9.55119					1.441	2.167	0.0844484	0.971772				2.177	43.628	0.127581	19.5646
			48.698	3.883	1.40233	0.795018					2.718	50.114	0.0782689	10.2605					63.082	7.662	1.9232	1.16538				2.002	40.635	0.0610356	6.18053					8.992	2.451	0.526967	1.09913				2.728	59.809	0.159872	26.8208
			51.042	5.661	1.46983	1.15905					3.149	16.301	0.0906802	3.33752					11.908	9.064	0.363043	1.37862				3.19	79.156	0.0972545	12.0395					0.688	2.492	0.0403196	1.11752				2.004	46.596	0.117442	20.8956
			23.065	5.052	0.664191	1.03436					2.136	30.954	0.0615093	6.33763					13.34	6.302	0.406701	0.958526				1.834	36.795	0.0559137	5.59647					23.956	2.896	1.40392	1.29869				2.856	61.195	0.167373	27.4424
			32.198	4.487	0.92719	0.918683					2.187	35.089	0.0629779	7.18424					60.42	8.565	1.84204	1.30273				2.515	48.19	0.0766755	7.32963					16.678	1.771	0.977398	0.794189				2.864	57.702	0.167842	25.876
			44.215	6.002	1.27324	1.22887					3.358	47.774	0.0966986	9.78141					12.501	8.768	0.381122	1.3336				1.585	63.721	0.0483224	9.69188					21.546	2.414	1.26268	1.08254				3.084	33.743	0.180735	15.1318
			28.471	4.289	0.819865	0.878144					2.973	29.285	0.085612	5.99591					55.097	8.142	1.67976	1.23839				3.065	65.344	0.0934436	9.93874					12.092	2.092	0.70864	0.938139				2.121	58.966	0.124299	26.4428
			29.645	4.593	0.853672	0.940386					2.111	53.01	0.0607894	10.8534					1.441	12.378	0.0439322	1.88268				2.317	28.659	0.0706391	4.359					12.181	1.71	0.713856	0.766835				7.095	30.706	0.415796	13.7698
			29.668	5.904	0.854335	1.2088					2.223	50.08	0.0640146	10.2535					31.614	9.113	0.963825	1.38608				2.008	38.671	0.0612185	5.88181					27.876	2.245	1.63365	1.00675				2.849	42.329	0.166963	18.9821
			31.375	6.142	0.90349	1.25753					2.132	62.028	0.0613941	12.6998					16.353	9.863	0.498559	1.50015				2.434	26.845	0.0742061	4.08309					3.013	0.807	0.176574	0.361892				2.825	50.244	0.165556	22.5315
			32.297	5.361	0.930041	1.09763					1.805	33.756	0.0519777	6.91132					10.321	10.258	0.314659	1.56023				1.448	57.652	0.0441456	8.76879					1.981	2.36	0.116095	1.05832				2.721	54.097	0.159462	24.2593
			44.173	4.495	1.27203	0.920321					1.915	26.587	0.0551453	5.44351					5.561	7.998	0.16954	1.21649				1.819	45.586	0.0554564	6.93357					16.539	2.158	0.969252	0.967736				2.212	51.201	0.129632	22.9606
			22.833	4.226	0.65751	0.865245					2	40.258	0.057593	8.24256					59.233	7.615	1.80585	1.15823				3.113	31.157	0.0949069	4.73894					15.543	1.714	0.910883	0.768628				2.337	57.354	0.136958	25.7199
			27.374	3.6	0.788275	0.737076					1.666	44.08	0.047975	9.02509					55.46	15.363	1.69083	2.33669				1.771	44.129	0.053993	6.71196					11.144	1.999	0.653083	0.896434				2.126	61.668	0.124592	27.6545
			27.247	4.357	0.784618	0.892067					3.347	46.006	0.0963819	9.41942					1.066	3.75	0.0324995	0.57037				1.966	48.43	0.059938	7.36614					8.573	1.813	0.502412	0.813024				1.438	12.871	0.0842726	5.77189
			16.241	3.622	0.467684	0.74158					3.168	49.178	0.0912273	10.0689					35.369	9.181	1.07831	1.39642				3.176	41.085	0.0968276	6.24897					26.246	2.472	1.53812	1.10855				2.739	24.836	0.160516	11.1375
			12.905	4.416	0.371619	0.904147					2.44	35.376	0.0702635	7.243					62.534	9.434	1.90649	1.4349				2.329	30.506	0.0710049	4.63992					4.421	2.198	0.259088	0.985674				2.463	55.103	0.144342	24.7105
			23.666	4.706	0.681498	0.963522					3.465	58.284	0.0997799	11.9333					6.932	9.722	0.211338	1.4787				2.866	32.347	0.0873766	4.91994					13.315	1.877	0.780313	0.841724				2.079	54.226	0.121838	24.3172
			44.125	5.606	1.27065	1.14779					2.664	51.205	0.0767139	10.4839					3.882	10.425	0.118352	1.58563				2.239	61.127	0.0682611	9.29734					0.925	2.436	0.0542087	1.0924				1.67	40.667	0.0978687	18.2368
			33.471	5.03	0.963848	1.02986					2.048	33.956	0.0589752	6.95227					13.579	10.337	0.413987	1.57224				1.827	40.557	0.0557003	6.16867					9.452	1.895	0.553925	0.849796				4.855	46.065	0.284523	20.6574
			20.434	4.333	0.588428	0.887153					2.335	51.958	0.0672398	10.6381					65.979	8.557	2.01152	1.30151				3.286	81.459	0.100181	12.3898					30.754	3.111	1.80231	1.3951				3.449	64.041	0.202125	28.7186
			31.463	4.414	0.906024	0.903737					2.452	31.76	0.070609	6.50265					29.049	9.314	0.885625	1.41665				2.538	57.765	0.0773768	8.78598					30.109	2.533	1.76451	1.1359				2.901	52.564	0.17001	23.5719
			35.15	5.243	1.0122	1.07347					2.606	49.846	0.0750437	10.2056					6.715	8.099	0.204722	1.23185				2.515	68.981	0.0766755	10.4919					27.982	2.885	1.63986	1.29375				2.408	59.187	0.141119	26.5419
			19.416	4.125	0.559113	0.844566					2.41	40.913	0.0693996	8.37667					65.17	9.646	1.98686	1.46714				2.811	66.271	0.0856998	10.0797					0.861	2.681	0.0504581	1.20227				3.746	37.964	0.219531	17.0246
			12.814	5.639	0.368998	1.15455					1.925	53.364	0.0554333	10.9259					13.005	9.725	0.396487	1.47916				2.724	64.557	0.0830474	9.81903					6.507	4.94	0.381336	2.2153				1.897	59.472	0.111172	26.6697
			46.673	4.441	1.34402	0.909265					1.981	40.052	0.0570459	8.20038					67.03	9.524	2.04356	1.44859				1.712	25.486	0.0521942	3.87639					17.837	2.127	1.04532	0.953835				2.267	60.58	0.132855	27.1666
			17.663	5.186	0.508633	1.0618					2.057	31.119	0.0592344	6.37141					27.76	9.11	0.846327	1.38562				2.813	48.395	0.0857608	7.36081					12.067	1.827	0.707175	0.819302				1.814	30.472	0.106308	13.6649
			27.43	4.394	0.789888	0.899642					2.52	62.387	0.0725672	12.7733					11.858	9.724	0.361518	1.47901				2.506	64.572	0.0764012	9.82132					18.081	2.645	1.05962	1.18613				1.937	19.046	0.113516	8.54101
			24.308	3.954	0.699985	0.809555					2.006	50.049	0.0577658	10.2472					3.379	7.499	0.103017	1.14059				3.203	74.707	0.0976508	11.3628					11.864	2.284	0.695278	1.02424				2.419	49.999	0.141763	22.4216
			29.308	4.175	0.843968	0.854804					2.524	49.195	0.0726824	10.0723					7.332	6.994	0.223533	1.06378				1.608	53.607	0.0490236	8.15355					26.53	2.474	1.55477	1.10944				1.744	42.31	0.102205	18.9735
			31.253	5.423	0.899977	1.11032					2.556	33.228	0.0736039	6.80321					43.797	10.209	1.33525	1.55278				2.368	66.952	0.0721939	10.1833					11.374	2.109	0.666562	0.945763				3.221	48.808	0.188764	21.8875
			29.76	4.607	0.856984	0.943253					2.083	37.755	0.0599831	7.73009					7.068	7.949	0.215484	1.20903				2.532	66.686	0.0771938	10.1429					12.769	2.28	0.748315	1.02245				1.388	26.87	0.0813424	12.0496
			15.408	4.488	0.443696	0.918888					2.325	40.962	0.0669519	8.3867					21.677	11.918	0.660873	1.81271				2.447	28.929	0.0746024	4.40006					13.556	2.254	0.794436	1.01079				2.466	44.847	0.144518	20.1112
			35.04	4.897	1.00903	1.00263					2.862	61.526	0.0824156	12.597					44.542	8.875	1.35797	1.34988				2.762	64.317	0.0842059	9.78253					12.533	2.483	0.734484	1.11348				2.176	53.566	0.127522	24.0212
			41.305	3.466	1.18944	0.70964					2.652	52.467	0.0763683	10.7423					0.979	9.95	0.0298471	1.51338				2.157	29.34	0.0657611	4.46257					0.754	2.502	0.0441874	1.122				0.904	5.718	0.052978	2.56419
			26.976	5.806	0.776814	1.18874					2.06	37.899	0.0593208	7.75957					0.907	8.316	0.027652	1.26485				2.611	61.668	0.0796023	9.37962					8.058	1.636	0.472231	0.73365				1.36	29.064	0.0797015	13.0335
			30.274	5.275	0.871785	1.08002					2.421	47.513	0.0697163	9.72797					14.177	10.811	0.432218	1.64434				2.487	67.244	0.0758219	10.2277					14.524	2.146	0.851165	0.962355				2.171	32.825	0.127229	14.7201
			17.337	3.268	0.499245	0.669101					19.716	5.272	0.567752	1.07941					8.844	6.678	0.26963	1.01571				1.844	15.06	0.0562186	2.29061					32.526	2.385	1.90615	1.06953				35.912	14.826	2.10459	6.64859
			39.137	4.33	1.12701	0.886539					31.656	4.986	0.911582	1.02085					1.284	7.682	0.0391457	1.16842				3.197	67.586	0.0974679	10.2797					3.306	2.057	0.193745	0.922444				2.187	45.124	0.128167	20.2355
			15.466	3.851	0.445367	0.788467					1.867	27.996	0.0537631	5.732					0.76	8.266	0.0231703	1.25725				2.332	40.463	0.0710964	6.15437					0.486	2.381	0.0284816	1.06774				2.409	44.592	0.141177	19.9969
			39.763	3.98	1.14504	0.814879					2.434	25.766	0.0700907	5.27542					0.835	5.439	0.0254569	0.827265				3.274	49.788	0.0998154	7.57269					0.806	2.718	0.0472349	1.21886				2.518	62.196	0.147565	27.8913
			27.447	4.174	0.790378	0.854599					2.394	24.311	0.0689388	4.97752					45.703	10.593	1.39336	1.61118				2.228	52.271	0.0679257	7.95035					17.988	2.093	1.05417	0.938588				1.857	33.047	0.108828	14.8196
			21.371	3.771	0.61541	0.772087					2.621	30.477	0.0754756	6.23996					61.376	7.572	1.87119	1.15169				2.336	56.49	0.0712183	8.59205					18.098	1.971	1.06062	0.883878				2.474	59.402	0.144986	26.6383
			29.85	3.33	0.859576	0.681795					2.276	46.457	0.0655408	9.51176					39.898	10.928	1.21638	1.66213				3.26	62.687	0.0993886	9.53461					13.834	2.315	0.810728	1.03814				2.511	57.251	0.147155	25.6737
			3.753	5.532	0.108073	1.13264					2.634	54.307	0.07585	11.119					1.061	7.343	0.032347	1.11686				2.173	39.11	0.0662489	5.94858					28.841	2.726	1.6902	1.22245				32.675	7.375	1.91489	3.30725
			23.599	3.972	0.679569	0.813241					0.649	6.554	0.0186889	1.34189					0.909	6.497	0.027713	0.988185				2.256	55.074	0.0687793	8.37668					14.712	2.162	0.862183	0.96953				2.196	44.742	0.128694	20.0642
			20.229	4.186	0.582524	0.857056					2.802	40.099	0.0806878	8.21					59.663	8.644	1.81896	1.31474				2.732	18.486	0.0832913	2.8117					14.226	2.196	0.833701	0.984777				2.032	33.726	0.119083	15.1241
			35.143	2.724	1.012	0.557721					3.501	68.895	0.100817	14.1058					1.189	4.573	0.0362494	0.695547				2.836	52.017	0.086462	7.91172					25.088	2.965	1.47026	1.32963				3.098	48.023	0.181555	21.5355
			5.422	4.669	0.156135	0.955947					0.96	7.92	0.0276446	1.62157					1.791	4.858	0.0546027	0.738895				2.188	63.188	0.0667062	9.61081					21.611	1.889	1.26649	0.847105				1.941	39.648	0.11375	17.7798
			29.87	3.451	0.860151	0.706569					2.248	48.658	0.0647345	9.9624					0.771	4.165	0.0235057	0.633491				1.783	56.517	0.0543588	8.59616					6.369	2.255	0.373249	1.01123				2.689	37.927	0.157586	17.008
			29.084	4.872	0.837517	0.99751					2.103	48.551	0.060559	9.94049					1.436	12.475	0.0437798	1.89743				2.366	63.556	0.0721329	9.66678					21.805	2.182	1.27786	0.978499				2.333	58.262	0.136723	26.1271
			34.302	4.208	0.987778	0.86156					2.239	54.615	0.0644754	11.1821					49.385	12.622	1.50562	1.91979				2.119	60.143	0.0646026	9.14767					19.32	2.09	1.13223	0.937242				1.719	43.684	0.10074	19.5897
			36.228	5.01	1.04324	1.02576					2.502	38.406	0.0720488	7.86337					0.899	8.399	0.0274081	1.27748				3.605	55.446	0.109907	8.43326					9.671	2.102	0.56676	0.942623				2.316	43.624	0.135727	19.5628
			31.877	4.783	0.917946	0.979287					2.093	54.7	0.0602711	11.1995					54.522	10.181	1.66223	1.54852				3.317	68.741	0.101126	10.4554					18.83	1.91	1.10351	0.856523				2.326	39.725	0.136313	17.8143
			32.16	4.729	0.926095	0.968231					8.711	6.899	0.250846	1.41252					0.834	9.873	0.0254264	1.50167				2.854	66.101	0.0870107	10.0539					0.489	2.471	0.0286574	1.1081				1.218	63.31	0.0713797	28.3908
			28.417	4.876	0.81831	0.998329					8.423	6.983	0.242553	1.42972					1.004	10.788	0.0306092	1.64084				1.963	56.807	0.0598466	8.64027					0.943	2.674	0.0552636	1.19913				2.203	51.087	0.129105	22.9095
			53.72	5.376	1.54695	1.1007					2.329	36.005	0.067067	7.37178					0.773	10.661	0.0235667	1.62152				3.902	59.689	0.118961	9.07862					1.584	0.443	0.0928288	0.198659				2.428	36.044	0.142291	16.1636
			24.491	4.329	0.705255	0.886334					2.669	41.604	0.0768579	8.51814					34.193	11.982	1.04245	1.82245				3.04	46.074	0.0926814	7.00779					17.763	2.866	1.04098	1.28523				2.642	40.293	0.154832	18.069
			42.752	5.489	1.23111	1.12384					43.784	5.682	1.26083	1.16335					1.525	7.294	0.0464931	1.10941				3.348	79.306	0.102071	12.0623					21.526	2.171	1.26151	0.973566				2.341	39.451	0.137192	17.6915
			34.569	5.112	0.995466	1.04665					2.101	68.893	0.0605014	14.1054					39.043	12.098	1.19032	1.84009				1.897	46.078	0.0578344	7.0084					12.662	2.361	0.742044	1.05877				2.15	34.742	0.125999	15.5797
			28.222	4.349	0.812695	0.890429					43.237	6.28	1.24507	1.28579					0.867	3.422	0.0264325	0.520482				3.004	69.222	0.0915838	10.5286					5.26	2.54	0.308257	1.13904				2.752	38.661	0.161278	17.3372
			20.373	4.96	0.586671	1.01553					3.195	28.109	0.0920048	5.75513					0.825	10.751	0.025152	1.63521				4.194	51.845	0.127864	7.88556					0.46	2.954	0.0269579	1.3247				3.676	5.366	0.215428	2.40634
			0.924	7.474	0.026608	1.53025					3.092	54.644	0.0890388	11.188					7.199	3.846	0.219478	0.584971				2.357	78.317	0.0718586	11.9119					17.206	2.143	1.00834	0.96101				1.638	21.764	0.0959934	9.75988
			19.785	3.638	0.569739	0.744856					2.48	42.086	0.0714153	8.61683					1.179	10.039	0.0359445	1.52692				1.736	58.905	0.0529259	8.95937					16.441	1.976	0.963509	0.88612				2.352	55.66	0.137837	24.9602
			24.658	4.471	0.710064	0.915408					2.195	60.485	0.0632083	12.3839					0.963	8.724	0.0293593	1.32691				2.228	74.807	0.0679257	11.378					23.043	2.185	1.35041	0.979844				2.869	62.425	0.168135	27.9939
			33.58	5.046	0.966986	1.03313					2.657	53.48	0.0765123	10.9497					35.75	6.22	1.08992	0.946054				2.811	68.643	0.0856998	10.4405					16.45	2.441	0.964036	1.09465				1.148	32.245	0.0672774	14.46
			1.238	7.202	0.0356501	1.47456					2.24	23.862	0.0645042	4.88559					11.087	2.778	0.338013	0.42253				2.371	77.353	0.0722854	11.7653					25.725	2.443	1.50759	1.09554				1.556	36.306	0.0911879	16.2811
			28.204	4.249	0.812176	0.869955					2.467	31.194	0.071041	6.38676					1.489	5.838	0.0453956	0.887952				2.692	31.331	0.0820718	4.7654					0.834	2.615	0.0488758	1.17267				5.019	12.895	0.294134	5.78265
			63.285	5.435	1.82239	1.11278					1.699	30.384	0.0489253	6.22092					0.609	2.977	0.0185668	0.452798				2.567	29.735	0.0782609	4.52265					0.426	2.592	0.0249653	1.16236				1.57	31.694	0.0920083	14.2129
			36.061	4.837	1.03843	0.990344					2.18	46.669	0.0627764	9.55517					0.843	7.384	0.0257008	1.1231				2.294	75.701	0.0699379	11.514					22.435	2.058	1.31478	0.922892				1.529	43.761	0.0896056	19.6242
			30.096	4.118	0.866659	0.843133					2.469	65.741	0.0710986	13.46					1.997	4.809	0.0608831	0.731442				2.207	41.159	0.0672855	6.26023					15.301	2.036	0.8967	0.913026				1.172	21.772	0.0686839	9.76346
			32.482	4.559	0.935368	0.933425					2.737	56.6	0.078816	11.5885					0.957	12.193	0.0291763	1.85454				1.053	8.889	0.0321031	1.35201					23.982	2.398	1.40544	1.07536				2.385	56.423	0.139771	25.3024
			44.732	4.632	1.28813	0.948371					2.988	30.174	0.0860439	6.17793					1.129	10.527	0.0344202	1.60114				2.367	60.287	0.0721634	9.16957					26.333	2.35	1.54322	1.05384				1.836	48.198	0.107597	21.614
			35.972	4.831	1.03587	0.989115					2.044	33.253	0.05886	6.80833					8.223	2.158	0.250697	0.328229				2.428	60.73	0.0740232	9.23695					17.302	1.961	1.01397	0.879393				1.402	47.028	0.0821629	21.0893
			35.088	4.818	1.01041	0.986454					4.484	46.882	0.129124	9.59878					2.334	5.085	0.0711573	0.773422				2.35	34.113	0.0716451	5.18854					1.102	2.258	0.0645816	1.01258				1.913	55.776	0.11211	25.0123
			32.163	5.05	0.926182	1.03395					2.241	38.868	0.064533	7.95796					79.221	10.096	2.41523	1.53559				2.323	69.603	0.070822	10.5865					14.068	2.464	0.824442	1.10496				1.788	38.674	0.104784	17.343
			34.512	4.726	0.993825	0.967617					2.151	42.072	0.0619413	8.61396					65.219	10.484	1.98835	1.5946				2.775	71.073	0.0846022	10.8101					17.824	2.664	1.04456	1.19465				2.55	60.505	0.14944	27.1329
			37.952	4.859	1.09288	0.994848					0.812	7.197	0.0233828	1.47354					77.508	10.559	2.36301	1.60601				2.492	61.537	0.0759743	9.3597					26.283	2.357	1.54029	1.05698				2.748	52.407	0.161044	23.5015
			4.142	5.13	0.119275	1.05033					2.562	46.165	0.0737766	9.45198					33.935	12.754	1.03459	1.93987				2.306	47.453	0.0703037	7.21754					8.752	2.077	0.512903	0.931412				1.999	53.813	0.117149	24.132
			47.866	4.634	1.37837	0.948781					2.005	47.499	0.057737	9.7251					73.451	10.158	2.23932	1.54502				1.913	61.5	0.0583222	9.35407					11.835	2.905	0.693579	1.30272				2.114	47.118	0.123889	21.1297
			46.202	4.329	1.33046	0.886334					0.857	8.781	0.0246786	1.79785					36.259	14.544	1.10544	2.21212				2.617	58.166	0.0797852	8.84697					18.481	2.334	1.08306	1.04666				2.467	58.083	0.144576	26.0468
			43.987	4.355	1.26667	0.891657					1.667	45.888	0.0480038	9.39526					65.323	8.643	1.99152	1.31459				2.82	43.912	0.0859742	6.67896					16.388	2.09	0.960403	0.937242				2.134	44.837	0.125061	20.1068
			6.912	4.414	0.199041	0.903737					2.337	29.793	0.0672974	6.09992					81.661	10.544	2.48962	1.60373				2.716	53.584	0.0828035	8.15005					21.34	2.608	1.25061	1.16953				2.28	51.4	0.133617	23.0499
			44.203	4.723	1.27289	0.967003					2.036	38.101	0.0586297	7.80093					93.823	10.545	2.86041	1.60388				2.579	40.992	0.0786267	6.23483					13.076	4.608	0.766306	2.06642				3.099	51.016	0.181614	22.8777
			18.992	4.126	0.546903	0.844771					2.122	48.245	0.0611062	9.87784					62.348	9.968	1.90082	1.51612				2.516	50.139	0.076706	7.62608					25.348	2.791	1.4855	1.2516				38.378	4.285	2.24911	1.92157
			48.391	4.666	1.39349	0.955333					1.863	22.719	0.0536479	4.65156					73.77	10.275	2.24905	1.56281				2.976	47.002	0.0907302	7.14894					25.313	2.447	1.48344	1.09734				3.249	55.585	0.190405	24.9266
			40.606	5.263	1.16931	1.07756					2.539	43.539	0.0731143	8.91432					64.51	7.583	1.96674	1.15336				3.096	68.233	0.0943887	10.3781					29.108	2.79	1.70585	1.25115				2.462	31.307	0.144283	14.0393
			3.746	5.876	0.107872	1.20307					2.833	45.58	0.0815805	9.3322					59.806	9.128	1.82332	1.38836				2.989	53.605	0.0911265	8.15325					29.986	3.223	1.7573	1.44533				2.429	47.709	0.142349	21.3947
			0.915	7.706	0.0263488	1.57775					30.116	5.642	0.867235	1.15516					62.993	8.443	1.92049	1.28417				1.415	65.988	0.0431395	10.0367					0.714	2.603	0.0418433	1.16729				1.808	6.973	0.105956	3.12698
			25.761	5.249	0.741827	1.0747					1.835	52.117	0.0528416	10.6706					67.504	9.941	2.05801	1.51201				2.864	54.505	0.0873156	8.29014					17.857	2.076	1.04649	0.930964				2.209	55.02	0.129456	24.6732
			12.528	4.376	0.360763	0.895957					2.172	28.832	0.062546	5.90316					75.093	7.769	2.28938	1.18165				41.187	7.796	1.25568	1.18576					19.748	2.249	1.15731	1.00854				2.241	52.065	0.131332	23.3481
			42.057	4.286	1.21109	0.87753					2.505	42.8	0.0721352	8.76302					89.327	10.898	2.72334	1.65757				2.946	73.253	0.0898156	11.1417					1.154	2.751	0.0676291	1.23366				2.461	51.629	0.144225	23.1526
			3.48	2.441	0.100212	0.499779					2.648	57.643	0.0762531	11.802					89.649	11.559	2.73316	1.75811				2.136	52.669	0.0651209	8.01088					20.478	2.682	1.20009	1.20272				2.101	49.433	0.123127	22.1678
			29.195	4.557	0.840714	0.933015					30.853	5.068	0.888458	1.03764					72.611	8.079	2.21371	1.22881				2.138	58.214	0.0651818	8.85427					0.715	2.82	0.0419019	1.2646				2.098	32.456	0.122951	14.5546
			34.677	4.672	0.998576	0.956561					2.9	44.59	0.0835099	9.12951					45.266	12.05	1.38004	1.83279				2.285	39.782	0.0696635	6.05079					15.224	2.132	0.892188	0.956077				2.384	46.724	0.139712	20.953
			25.559	4.302	0.73601	0.880806					1.999	32.503	0.0575642	6.65477					67.082	9.008	2.04515	1.3701				2.566	58.647	0.0782304	8.92013					0.793	2.955	0.046473	1.32514				2.01	50.51	0.117794	22.6508
			25.889	4.21	0.745513	0.86197					2.854	50.149	0.0821852	10.2677					85.508	9.366	2.60691	1.42456				2.328	60.08	0.0709744	9.13809					10.935	2.306	0.640835	1.03411				2.454	27.178	0.143814	12.1877
			6.308	7.954	0.181648	1.62853					2.551	43.679	0.0734599	8.94299					83.425	9.872	2.5434	1.50152				2.921	72.107	0.0890534	10.9674					17.836	2.729	1.04526	1.2238				2.734	38.304	0.160223	17.1771
			6.149	4.479	0.17707	0.917046					1.849	50.962	0.0532447	10.4341					75.23	9.511	2.29356	1.44661				26.018	7.283	0.793218	1.10773					24.035	2.737	1.40855	1.22738				2.254	55.866	0.132093	25.0526
			9.592	5.789	0.276216	1.18526					2.37	29.111	0.0682477	5.96028					58.838	8.924	1.79381	1.35733				3.077	71.524	0.0938094	10.8787					25.018	3.181	1.46616	1.42649				2.883	57.943	0.168955	25.984
			60.278	4.952	1.7358	1.01389					2.249	55.781	0.0647633	11.4208					48.933	9.718	1.49183	1.47809				2.713	56.759	0.082712	8.63297					0.586	2.366	0.034342	1.06101				2.205	52.044	0.129222	23.3387
			37.668	4.334	1.08471	0.887358					1.869	35.691	0.0538207	7.3075					80.864	10.082	2.46532	1.53346				1.026	53.299	0.03128	8.10671					19.79	2.41	1.15977	1.08074				2.009	26.999	0.117736	12.1075
			40.399	4.562	1.16335	0.934039					4.189	44.004	0.120629	9.00953					84.341	8.936	2.57133	1.35915				3.013	56.298	0.0918582	8.56285					20.017	2.872	1.17308	1.28792				14.044	19.697	0.823035	8.83295
			48.777	4.228	1.40461	0.865655					2.495	49.095	0.0718473	10.0519					49.095	10.112	1.49677	1.53802				1.123	34.851	0.0342372	5.30079					21.773	3.365	1.27599	1.509				2.479	52.953	0.145279	23.7463
			29.743	4.233	0.856494	0.866679					3.542	42.947	0.101997	8.79311					86.856	12.41	2.648	1.88754				2.265	50.014	0.0690537	7.60706					17.436	2.183	1.02182	0.978947				2.979	40.731	0.174581	18.2655
			37.911	4.638	1.0917	0.9496					2.39	36.915	0.0688236	7.5581					61.084	11.01	1.86229	1.67461				29.283	6.868	0.892759	1.04461					15.712	3.125	0.920787	1.40138				2.126	63.819	0.124592	28.6191
			29.474	4.117	0.848748	0.842928					2.266	56.901	0.0652529	11.6501					47.656	11.342	1.4529	1.7251				3.054	57.974	0.0931082	8.81777					5.44	3.212	0.318806	1.44039				2.431	31.444	0.142466	14.1008
			3.695	3.802	0.106403	0.778434					1.8	32.327	0.0518337	6.61874					56.782	10.11	1.73113	1.53772				5.11	6.95	0.15579	1.05709					0.704	2.858	0.0412572	1.28165				2.08	47.948	0.121896	21.5019
			22.223	4.742	0.639945	0.970893					2.265	36.494	0.0652241	7.4719					73.792	10.732	2.24972	1.63232				13.137	7.366	0.400512	1.12036					17.582	2.419	1.03038	1.08478				2.745	52.198	0.160868	23.4077
			63.303	4.395	1.8229	0.899847					1.964	36.971	0.0565563	7.56957					88.202	9.703	2.68904	1.47581				1.829	64.098	0.0557613	9.74922					16.132	2.665	0.9454	1.1951				2.665	44.125	0.15618	19.7875
			1.092	6.38	0.0314458	1.30626					2.145	44.108	0.0617685	9.03082					58.643	10.367	1.78787	1.57681				3.016	58.921	0.0919497	8.96181					24.354	3.263	1.42724	1.46326				2.125	35.891	0.124534	16.095
			0.901	6.41	0.0259456	1.3124					2.465	44.515	0.0709834	9.11415					72.743	9.152	2.21774	1.39201				42.643	6.596	1.30007	1.00324					24.46	3.099	1.43345	1.38972				3.465	64.786	0.203063	29.0527
			1.155	7.074	0.03326	1.44835					1.83	44.024	0.0526976	9.01362					72.372	9.504	2.20643	1.44555				2.48	63.694	0.0756085	9.68777					34.813	3.406	2.04018	1.52739				2.365	33.986	0.138599	15.2407
			2.167	3.813	0.062402	0.780686					1.983	42.373	0.0571035	8.67559					48.045	10.481	1.46476	1.59415				2.856	48.568	0.0870717	7.38713					20.696	2.56	1.21287	1.14801				4.59	69.59	0.268993	31.207
			91.402	9.672	2.63206	1.98028					2.111	58.032	0.0607894	11.8817					61.224	10.089	1.86655	1.53452				15.83	4.284	0.482614	0.651591					20.591	3.573	1.20672	1.60228				2.638	22.021	0.154597	9.87512
			84.701	9.484	2.43909	1.94179					1.84	45.414	0.0529856	9.29821					48.46	9.685	1.47741	1.47308				37.661	6.748	1.14818	1.02636					0.644	2.26	0.037741	1.01348				2.927	27.668	0.171534	12.4075
			76.991	9.997	2.21707	2.04682					2.163	55.536	0.0622868	11.3706					47.189	12.257	1.43866	1.86427				21.228	6.374	0.647184	0.969477					4.707	3.504	0.275849	1.57134				2.787	24.741	0.163329	11.0949
			70.892	8.361	2.04144	1.71186					2.189	35.246	0.0630355	7.21638					78.633	9.057	2.39731	1.37756				28.842	7.277	0.879315	1.10682					14.562	3.385	0.853392	1.51797				2.388	64.731	0.139946	29.028
			21.201	10.107	0.610515	2.06934					2.002	30.315	0.0576506	6.20679					54.525	11.624	1.66232	1.76799				2.772	56.128	0.0845108	8.53699					0.506	2.665	0.0296536	1.1951				2.359	45.84	0.138247	20.5565
			94.596	9.098	2.72403	1.86276					1.934	48.109	0.0556924	9.85					76.436	9.649	2.33033	1.4676				2.166	56.968	0.0660355	8.66476					22.127	3.669	1.29673	1.64533				2.632	47.689	0.154246	21.3857
			67.552	9.482	1.94526	1.94138					1.752	38.312	0.0504515	7.84413					45.42	10.952	1.38473	1.66578				3.059	58.53	0.0932606	8.90233					2.083	3.212	0.122072	1.44039				1.779	14.836	0.104257	6.65307
			110.5	9.448	3.18201	1.93442					2.626	51.499	0.0756196	10.5441					76.812	10.947	2.34179	1.66502				1.815	49.728	0.0553344	7.56356					25.342	3.348	1.48514	1.50138				2.572	53.829	0.15073	24.1391
			92.629	9.894	2.66739	2.02573					2.48	58.578	0.0714153	11.9935					66.532	10.738	2.02838	1.63324				2.489	58.905	0.0758829	8.95937					18.897	3.176	1.10744	1.42425				3.053	67.025	0.178918	30.0568
			84.228	8.816	2.42547	1.80502					2.703	58.683	0.0778369	12.015					41.423	12.281	1.26288	1.86792				27.591	6.883	0.841175	1.0469					0.44	2.354	0.0257858	1.05563				2.027	45.893	0.11879	20.5803
			23.147	8.56	0.666553	1.7526					2.074	35.559	0.0597239	7.28047					72.122	11.841	2.1988	1.801				2.095	59.963	0.0638709	9.12029					17.914	4.246	1.04983	1.90408				2.245	73.767	0.131566	33.0802
			94.855	8.546	2.73149	1.74974					2.043	61.58	0.0588312	12.6081					68.908	11.157	2.10082	1.69696				1.988	50.968	0.0606087	7.75216					0.545	3.075	0.0319392	1.37896				2.129	57.593	0.124768	25.8271
			74.62	8.811	2.14879	1.80399					2.864	24.548	0.0824732	5.02604					26.451	9.652	0.806419	1.46806				2.188	62.624	0.0667062	9.52503					9.942	4.023	0.582641	1.80408				2.478	70.619	0.145221	31.6685
			87.537	8.529	2.52076	1.74626					3.202	52.312	0.0922064	10.7105					80.024	10.049	2.43972	1.52844				2.339	49.015	0.0713098	7.45512					21.836	3.828	1.27968	1.71663				2.484	70.609	0.145572	31.664
			88.832	9.17	2.55805	1.8775					2.933	51.737	0.0844601	10.5928					79.367	10.096	2.41969	1.53559				2.433	58.09	0.0741756	8.83541					1.056	3.194	0.0618859	1.43232				3.324	60.303	0.1948	27.0424
			95.456	9.187	2.7488	1.88098					2.604	50.41	0.0749861	10.3211					48.7	8.124	1.48473	1.23565				2.047	44.885	0.0624075	6.82695					20.731	3.721	1.21492	1.66865				2.033	43.5	0.119142	19.5072
			103.463	9.073	2.97937	1.85764					2.211	21.989	0.0636691	4.5021					43.627	11.089	1.33007	1.68662				2.051	58.842	0.0625294	8.94979					2.079	3.435	0.121838	1.5404				2.573	63.674	0.150788	28.554
			102.661	9.567	2.95628	1.95878					2.532	23.123	0.0729127	4.73428					59.522	9.989	1.81466	1.51931				1.965	41.133	0.0599075	6.25627					1.296	2.952	0.0759508	1.3238				1.375	33.406	0.0805805	14.9806
			102.407	9.5	2.94896	1.94506					2.226	38.388	0.064101	7.85969					32.749	11.693	0.998428	1.77849				1.933	52.377	0.0589319	7.96647					3.686	3.086	0.216014	1.38389				2.403	24.698	0.140825	11.0756
			90.612	9.038	2.60931	1.85047					2.596	32.173	0.0747557	6.58721					62.711	10.004	1.91189	1.5216				1.958	51.612	0.0596941	7.85012					17.614	3.982	1.03225	1.78569				3.273	80.624	0.191811	36.1551
			82.364	8.003	2.37179	1.63856					2.69	44.194	0.0774626	9.04843					30.354	7.659	0.925411	1.16492				2.056	34.777	0.0626819	5.28954					21.006	4.386	1.23104	1.96686				2.709	61.892	0.158758	27.7549
			86.986	8.399	2.50489	1.71964					2.055	21.989	0.0591768	4.5021					59.869	11.082	1.82524	1.68556				2.726	44.753	0.0831084	6.80687					1.157	3.136	0.0678049	1.40631				1.946	10.282	0.114043	4.61087
			92.492	8.332	2.66345	1.70592					15.225	11.916	0.438427	2.43972					32.366	11.799	0.986752	1.79461				1.624	24.079	0.0495114	3.66238					1.044	2.653	0.0611826	1.18971				2.289	57.205	0.134145	25.6531
			15.888	8.806	0.457519	1.80297					2.046	58.017	0.0589176	11.8786					45.417	12.19	1.38464	1.85408				2.375	31.405	0.0724073	4.77666					1.409	3.528	0.0825731	1.5821				2.987	36.717	0.17505	16.4654
			76.962	8.621	2.21624	1.76509					2.383	47.663	0.0686221	9.75868					25.464	12.67	0.776328	1.92709				1.261	40.104	0.0384445	6.09976					1.058	3.231	0.0620031	1.44891				2.361	38.201	0.138364	17.1309
			107.669	11.078	3.10049	2.26815					2.434	52.23	0.0700907	10.6937					21.17	7.446	0.645416	1.13253				3.551	38.624	0.10826	5.87466					0.537	3.14	0.0314704	1.40811				2.621	33.975	0.153601	15.2358
			65.308	8.239	1.88064	1.68688					13.43	13.375	0.386737	2.73844					38.452	9.989	1.1723	1.51931				1.788	48.556	0.0545113	7.3853					1.033	3.4	0.060538	1.5247				2.867	43.036	0.168018	19.2991
			74.955	8.556	2.15844	1.75178					1.925	41.332	0.0554333	8.46245					2.041	3.948	0.0622246	0.600486				2.195	57.45	0.0669196	8.73807					2.39	2.975	0.140064	1.33411				2.643	58.693	0.15489	26.3204
			72.279	8.79	2.08138	1.79969					2.489	52.574	0.0716745	10.7642					0.748	5.275	0.0228045	0.80232				2.577	59.412	0.0785658	9.03649					1.604	1.935	0.0940009	0.867734				2.759	57.944	0.161689	25.9845
			100.28	9.71	2.88771	1.98806					0.727	6.444	0.0209351	1.31937					15.155	11.441	0.462035	1.74016				2.546	67.033	0.0776207	10.1956					1.721	2.305	0.100858	1.03366				2.152	48.362	0.126116	21.6875
			51.75	10.641	1.49022	2.17867					2.505	44.274	0.0721352	9.06481					1.293	3.693	0.0394201	0.5617				2.225	19.283	0.0678342	2.93292					1.713	2.326	0.100389	1.04307				2.564	51.843	0.150261	23.2485
			81.587	9.058	2.34942	1.85457					0.878	7.841	0.0252833	1.60539					2.185	10.41	0.0666147	1.58335				2.425	55.434	0.0739317	8.43144					1.539	2.313	0.0901916	1.03724				2.319	48.149	0.135903	21.592
			90.144	8.902	2.59583	1.82263					3.133	55.694	0.0902194	11.403					8.763	10.476	0.26716	1.59339				2.326	26.079	0.0709134	3.96658					1.317	2.009	0.0771815	0.900918				2.629	55.617	0.15407	24.941
			77.047	10.334	2.21868	2.11582					8.52	26.529	0.245346	5.43164					10.378	10.733	0.316397	1.63247				2.25	49.96	0.0685964	7.59885					1.424	2.105	0.0834521	0.943969				2.212	61.228	0.129632	27.4572
			87.745	9.585	2.52675	1.96247					1.849	42.454	0.0532447	8.69217					0.588	13.225	0.0179265	2.0115				2.261	33.016	0.0689318	5.02169					2.552	2.512	0.149558	1.12648				2.451	36.892	0.143638	16.5439
			1.2	11.809	0.0345558	2.41781					2.122	25.44	0.0611062	5.20867					1.426	4.025	0.0434749	0.612197				2.807	26.562	0.0855778	4.04004					1.356	1.916	0.0794671	0.859213				2.929	59.518	0.171651	26.6903
			1.021	10.609	0.0294012	2.17212					2.467	38.215	0.071041	7.82427					0.85	6.886	0.0259142	1.04735				3.075	64.138	0.0937484	9.7553					1.361	2.254	0.0797601	1.01079				2.559	56.664	0.149968	25.4105
			51.162	10.455	1.47329	2.14059					2.585	39.827	0.074439	8.15431					13.152	10.044	0.400969	1.52768				1.899	36.577	0.0578954	5.56331					1.747	2.598	0.102381	1.16505				3.099	29.507	0.181614	13.2322
			11.171	8.975	0.321686	1.83757					2.281	61.421	0.0656848	12.5755					1.198	2.701	0.0365238	0.410818				2.294	26.743	0.0699379	4.06757					2.345	2.163	0.137426	0.969978				2.745	73.405	0.160868	32.9178
			14.164	8.537	0.407874	1.74789					2.106	44.363	0.0606454	9.08303					18.775	5.439	0.572399	0.827265				1.227	15.089	0.0374079	2.29502					1.73	3.085	0.101385	1.38344				2.722	42.12	0.15952	18.8883
			23.502	8.914	0.676775	1.82508					2.557	53.94	0.0736327	11.0439					6.664	3.092	0.203167	0.470289				2.445	44.921	0.0745414	6.83242					1.408	2.085	0.0825145	0.935				40.682	6.228	2.38413	2.79289
			59.74	6.538	1.7203	1.33861					2.78	41.578	0.0800543	8.51282					31.485	6.763	0.959892	1.02864				2.087	24.008	0.063627	3.65158					1.959	3.102	0.114805	1.39106				2.692	67.899	0.157762	30.4487
			66.28	6.961	1.90863	1.42522					2.052	31.257	0.0590904	6.39966					1.178	3.483	0.035914	0.52976				2.306	67.994	0.0703037	10.3418					1.554	2.199	0.0910707	0.986122				3.996	70.199	0.234182	31.4801
			65.965	6.361	1.89956	1.30237					2.134	74.077	0.0614517	15.1668					0.529	6.002	0.0161278	0.912896				1.566	37.471	0.0477431	5.69929					2.952	2.585	0.172999	1.15922				2.838	60.14	0.166318	26.9693
			74.935	6.14	2.15787	1.25712					3.489	41.863	0.100471	8.57117					1.134	9.884	0.0345726	1.50334				2.616	38.647	0.0797548	5.87816					1.208	2.236	0.0707937	1.00271				2.5	52.269	0.14651	23.4396
			0.978	5.749	0.028163	1.17707					2.109	57.127	0.0607318	11.6964					44.486	6.295	1.35626	0.957461				32.526	6.669	0.99163	1.01435					1.69	2.543	0.0990408	1.14039				2.962	64.322	0.173585	28.8446
			51.446	7.249	1.48146	1.48418					2.401	27.704	0.0691404	5.67221					12.672	5.469	0.386335	0.831828				32.493	5.213	0.990624	0.79289					9.719	2.991	0.569573	1.34129				2.398	32.046	0.140532	14.3707
			57.99	5.117	1.66991	1.04767					1.901	34.937	0.0547421	7.15312					6.331	5.201	0.193015	0.791065				2.351	68.355	0.0716756	10.3967					2.929	2.576	0.171651	1.15518				2.756	61.429	0.161513	27.5473
			64.658	6.307	1.86192	1.29132					2.454	63.514	0.0706666	13.0041					0.966	12.376	0.0294507	1.88237				44.323	7.643	1.35129	1.16249					1.619	3.015	0.0948799	1.35205				2.631	65.373	0.154187	29.3159
			0.736	4.682	0.0211942	0.958608					3.79	39.168	0.109139	8.01939					53.102	7.604	1.61894	1.15656				1.959	51.904	0.0597246	7.89453					1.303	2.172	0.0763611	0.974014				35.526	6.282	2.08197	2.81711
			92.063	6.345	2.65109	1.2991					1.971	32.514	0.0567579	6.65703					5.129	15.603	0.156369	2.3732				1.78	2.289	0.0542674	0.348154					5.079	2.551	0.29765	1.14397				2.434	24.792	0.142642	11.1178
			56.015	5.864	1.61304	1.20062					2.182	43.486	0.062834	8.90347					0.645	3.382	0.0196643	0.514398				1.899	50.96	0.0578954	7.75095					1.026	3.176	0.0601277	1.42425				2.164	40.931	0.126819	18.3551
			1.184	3.912	0.0340951	0.800956					2.25	33.747	0.0647921	6.90947					13.511	6.656	0.411914	1.01237				1.657	22.543	0.0505174	3.42876					2.652	2.457	0.155418	1.10182				2.333	62.779	0.136723	28.1527
			79.318	5.895	2.28408	1.20696					1.981	68.596	0.0570459	14.0446					5.146	5.526	0.156888	0.840497				2.299	66.663	0.0700903	10.1394					2.419	2.8	0.141763	1.25564				1.65	47.299	0.0966967	21.2108
			59.622	5.048	1.7169	1.03354					1.735	47.485	0.0499619	9.72224					0.928	3.272	0.0282922	0.497667				1.779	45.523	0.0542369	6.92399					1.464	3.099	0.0857963	1.38972				1.933	19.213	0.113282	8.6159
			1.491	4.681	0.0429356	0.958404					2.477	47.302	0.0713289	9.68477					6.998	6.31	0.21335	0.959743				1.591	39.509	0.0485053	6.00927					4.523	2.867	0.265066	1.28568				2.137	56.933	0.125237	25.5311
			53.198	6.85	1.53192	1.40249					2.07	69.368	0.0596088	14.2026					28.121	6.714	0.857333	1.02119				2.297	64.808	0.0700293	9.85721					2.623	2.937	0.153718	1.31707				1.922	20.474	0.112637	9.18139
			2.143	1.121	0.0617109	0.229517					2.204	43.822	0.0634675	8.97226					1.669	2.766	0.0508833	0.420705				31.882	5.131	0.971996	0.780418					4.189	2.571	0.245492	1.15294				2.034	36.558	0.119201	16.3941
			43.619	5.599	1.25607	1.14636					2.525	39.278	0.0727112	8.04191					4.292	6.617	0.130851	1.00644				1.925	34.597	0.058688	5.26216					1.325	3.022	0.0776503	1.35519				1.932	56.753	0.113223	25.4504
			54.49	4.701	1.56912	0.962499					2.219	48.221	0.0638994	9.87293					1.311	2.538	0.0399688	0.386026				31.923	5.59	0.973246	0.850232					2.004	3.106	0.117442	1.39286				1.058	12.597	0.0620031	5.64901
			75.577	6.633	2.17635	1.35806					2.012	52.476	0.0579386	10.7441					4.938	5.934	0.150546	0.902553				2.133	50.659	0.0650294	7.70517					4.22	3.233	0.247309	1.44981				2.749	41.334	0.161102	18.5359
			69.537	5.493	2.00242	1.12466					2.206	33.528	0.0635251	6.86464					15.774	7.522	0.480907	1.14409				1.939	53.664	0.0591149	8.16222					3.836	2.681	0.224805	1.20227				2.222	51.463	0.130218	23.0781
			46.29	6.037	1.33299	1.23604					2.557	62.227	0.0736327	12.7406					12.926	4.937	0.394079	0.750911				46.5	4.467	1.41766	0.679425					4.288	3.055	0.251294	1.36999				2.877	56.845	0.168604	25.4916
			50.557	5.143	1.45586	1.053					2.374	38.752	0.0683629	7.93421					45.481	5.978	1.38659	0.909246				1.868	37.555	0.0569503	5.71207					3.671	2.703	0.215135	1.21214				1.183	11.053	0.0693286	4.95662
			53.243	5.46	1.53321	1.1179					1.93	29.057	0.0555772	5.94923					37.806	7.418	1.1526	1.12827				2.729	47.237	0.0831998	7.18468					2.228	3.067	0.13057	1.37537				1.64	44.787	0.0961106	20.0843
			58.72	5.45	1.69093	1.11585					9.62	21.194	0.277022	4.33933					46.026	4.25	1.40321	0.646419				2.415	46.813	0.0736268	7.12019					6.556	3.299	0.384208	1.47941				2.398	28.509	0.140532	12.7846
			40.522	6.512	1.16689	1.33329					1.848	41.39	0.0532159	8.47433					55.92	7.511	1.70485	1.14241				25.514	4.646	0.777853	0.70665					2.473	2.594	0.144928	1.16326				2.63	16.102	0.154129	7.2208
			49.281	6.334	1.41912	1.29684					2.405	49.622	0.0692556	10.1598					51.165	5.03	1.55988	0.765056				2.683	55.7	0.0817974	8.4719					4.406	3.54	0.258209	1.58748				2.207	27.919	0.129339	12.52
			43.008	5.072	1.23848	1.03846					8.271	19.225	0.238176	3.93619					40.443	6.735	1.233	1.02438				2.152	48.866	0.0656087	7.43245					2.793	3.21	0.163681	1.4395				2.739	34.656	0.160516	15.5412
			42.228	5.397	1.21602	1.105					1.636	32.705	0.0471111	6.69613					26.51	6.514	0.808218	0.990771				42.268	5.505	1.28864	0.837303					3.529	3.033	0.206814	1.36012				2.611	46.334	0.153015	20.7781
			45.067	5.305	1.29777	1.08616					2.768	47.729	0.0797087	9.7722					37.04	6.002	1.12925	0.912896				2.468	38.829	0.0752426	5.90584					2.896	3.576	0.169717	1.60363				1.874	39.682	0.109824	17.795
			65.287	5.398	1.88004	1.1052					2.513	46.523	0.0723656	9.52528					0.779	3.802	0.0237496	0.578279				2.524	45.511	0.0769499	6.92216					29.918	2.69	1.75332	1.20631				2.076	39.179	0.121662	17.5695
			40.711	5.656	1.17233	1.15803					2.066	49.934	0.0594936	10.2237					36.537	4.566	1.11391	0.694483				2.589	48.443	0.0789316	7.36812					29.959	2.928	1.75572	1.31304				1.677	30.484	0.098279	13.6703
			60.652	6.624	1.74657	1.35622					2.226	39.437	0.064101	8.07446					46.81	3.895	1.42711	0.592424				2.144	46.897	0.0653648	7.13297					3.457	3.291	0.202594	1.47582				42.097	6.021	2.46705	2.70006
			39.651	5.121	1.14181	1.04849					1.918	39.154	0.0552317	8.01652					56.88	7.169	1.73412	1.0904				1.704	7.325	0.0519504	1.11412					32.232	3.331	1.88893	1.49376				40.375	5.506	2.36614	2.46912
			39.015	4.642	1.1235	0.950419					1.716	31.763	0.0494148	6.50326					38.558	6.118	1.17553	0.93054				2.345	36.7	0.0714927	5.58202					2.386	3.068	0.139829	1.37582				1.912	70.509	0.112051	31.6191
			45.838	5.348	1.31997	1.09497					1.578	3.054	0.0454409	0.625286					35.194	6.172	1.07297	0.938753				1.963	47.78	0.0598466	7.26727					31.679	2.615	1.85652	1.17267				2.806	45.162	0.164443	20.2525
			47.013	4.758	1.35381	0.974169					1.599	27.126	0.0460456	5.55387					24.121	8.105	0.735384	1.23276				1.13	38.951	0.0344506	5.9244					36.354	3.367	2.13049	1.5099				2.483	23.06	0.145514	10.3411
			44.763	6.932	1.28902	1.41928					2.292	57.12	0.0660016	11.6949					22.231	8.28	0.677763	1.25938				1.952	53.321	0.0595112	8.11005					1.869	3.228	0.109531	1.44757				3.885	61.968	0.227677	27.789
			65.977	5.438	1.89991	1.11339					2.891	60.708	0.0832507	12.4296					30.102	6.061	0.917729	0.92187				1.051	48.731	0.0320421	7.41192					29.358	2.61	1.7205	1.17043				3.662	59.978	0.214608	26.8966
			58.59	6.009	1.68719	1.2303					2.809	51.625	0.0808894	10.5699					28.082	4.561	0.856144	0.693722				1.101	27.898	0.0335665	4.24325					2.169	2.992	0.127112	1.34174				3.223	61.478	0.188881	27.5693
			46.601	5.603	1.34195	1.14718					1.81	34.904	0.0521217	7.14636					37.743	7.169	1.15068	1.0904				0.929	21.675	0.0283227	3.29674					27.398	2.26	1.60563	1.01348				1.825	60.658	0.106952	27.2015
			40.913	5.975	1.17815	1.22334					1.936	30.395	0.05575	6.22317					7.373	6.297	0.224783	0.957765				2.636	73.757	0.0803645	11.2183					10.439	3.202	0.611768	1.43591				2.224	50.791	0.130335	22.7768
			45.532	5.473	1.31116	1.12056					1.885	32.551	0.0542814	6.6646					29.268	4.873	0.892302	0.741177				1.067	8.769	0.0325299	1.33375					2.078	3.326	0.121779	1.49152				3.008	52.049	0.176281	23.3409
			53.626	5.49	1.54424	1.12404					2.016	51.317	0.0580537	10.5068					15.532	6.218	0.473529	0.94575				2.041	43.711	0.0622246	6.64838					34.202	2.774	2.00438	1.24398				2.502	61.261	0.146627	27.472
			47.031	5.446	1.35433	1.11503					2.481	37.135	0.0714441	7.60314					36.779	7.512	1.12129	1.14257				2.191	48.414	0.0667977	7.3637					22.637	2.278	1.32662	1.02155				4.528	73.653	0.265359	33.029
			57.692	6.114	1.66133	1.2518					2.379	56.458	0.0685069	11.5594					30.174	5.736	0.919924	0.872438				2.082	35.082	0.0634745	5.33593					34.199	2.773	2.0042	1.24353				3.823	51.327	0.224043	23.0171
			52.704	4.625	1.51769	0.946938					2.405	25.467	0.0692556	5.2142					30.554	6.996	0.931509	1.06408				12.277	54.45	0.374293	8.28177					27.668	2.164	1.62146	0.970427				2.356	38.92	0.138071	17.4533
			68.595	4.563	1.9753	0.934244					1.874	44.564	0.0539646	9.12418					33.653	5.305	1.02599	0.806883				4.144	55.934	0.126339	8.50749					32.45	2.334	1.9017	1.04666				3.918	55.562	0.229611	24.9163
			5.597	24.336	0.161174	4.98263					1.766	39.283	0.0508546	8.04293					0.795	4.336	0.0242374	0.6595				2.372	45.814	0.0723159	6.96825					31.865	3.219	1.86742	1.44353				3.197	60.934	0.187357	27.3253
			50.482	5.532	1.4537	1.13264					3.015	42.875	0.0868214	8.77837					2.002	3.675	0.0610356	0.558963				2.259	35.946	0.0688708	5.46734					22.354	1.774	1.31003	0.795535				2.131	37.634	0.124885	16.8766
			69.333	4.896	1.99655	1.00242					2.198	57.023	0.0632947	11.6751					25.457	4.305	0.776115	0.654785				1.132	27.557	0.0345116	4.19138					37.913	3.2	2.22185	1.43501				3.769	50.69	0.220879	22.7315
			46.654	5.806	1.34347	1.18874					3.055	35.953	0.0879733	7.36114					54.635	7.33	1.66567	1.11488				1.109	48.477	0.0338104	7.37329					3.708	3.415	0.217304	1.53143				3.782	57.237	0.22164	25.6674
			67.704	4.468	1.94964	0.914793					2.029	52.411	0.0584281	10.7308					26.19	3.827	0.798462	0.582082				1.101	32.622	0.0335665	4.96176					26.549	2.154	1.55588	0.965942				4.927	58.099	0.288742	26.054
			63.639	4.524	1.83258	0.926259					1.647	30.593	0.0474278	6.26371					46.476	6.845	1.41693	1.04112				1.74	56.704	0.0530479	8.6246					24.94	2.47	1.46158	1.10765				3.472	81.116	0.203473	36.3758
			50.293	6.037	1.44826	1.23604					1.777	61.209	0.0511714	12.5321					26.707	5.844	0.814224	0.888865				1.722	65.063	0.0524991	9.896					28.512	2.423	1.67092	1.08657				3.153	54.411	0.184779	24.4001
			48.138	5.609	1.38621	1.14841					2.11	33.986	0.0607606	6.95841					36.362	4.944	1.10858	0.751976				1.467	7.301	0.0447249	1.11047					31.28	2.738	1.83313	1.22783				3.709	58.952	0.217362	26.4365
			43.189	4.755	1.24369	0.973555					2.305	48.675	0.0663759	9.96588					46.304	5.658	1.41168	0.860574				2.607	38.674	0.0794804	5.88226					36.602	3.491	2.14502	1.56551				1.836	39.033	0.107597	17.504
			36.411	5.655	1.04851	1.15782					1.712	39.752	0.0492996	8.13896					38.482	3.959	1.17321	0.602159				2.799	61.413	0.0853339	9.34084					25.163	2.597	1.47465	1.1646				2.32	38.047	0.135961	17.0618
			71.24	4.449	2.05146	0.910903					1.875	63.705	0.0539934	13.0432					37.401	5.805	1.14026	0.882933				4.752	58.044	0.144876	8.82841					2.834	3.083	0.166084	1.38254				3.581	45.427	0.209861	20.3713
			51.926	4.795	1.49529	0.981744					2.337	27.61	0.0672974	5.65296					33.369	5.561	1.01733	0.845821				1.021	7.311	0.0311275	1.11199					31.085	3.882	1.82171	1.74085				2.596	63.729	0.152136	28.5787
			46.379	5.456	1.33555	1.11708					2.33	34.976	0.0670958	7.1611					24.742	5.507	0.754317	0.837607				1.964	54.928	0.059877	8.35448					23.64	1.906	1.3854	0.854729				2.854	55.481	0.167256	24.88
			58.689	6.528	1.69004	1.33656					2.234	23.068	0.0643314	4.72302					40.616	3.588	1.23827	0.54573				1.852	45.442	0.0564625	6.91167					30.062	2.105	1.76175	0.943969				3.582	65.433	0.20992	29.3429
			52.136	6.622	1.50133	1.35581					2.054	40.916	0.059148	8.37728					36.86	4.664	1.12376	0.709388				1.883	28.836	0.0574076	4.38592					31.838	3.248	1.86584	1.45654				3.187	63.803	0.186771	28.6119
			44.83	5.381	1.29095	1.10172					1.803	35.435	0.0519201	7.25508					58.481	6.151	1.78293	0.935559				1.971	71.043	0.0600905	10.8055					4.065	3.591	0.238225	1.61035				2.541	53.837	0.148913	24.1427
			48.033	6.103	1.38318	1.24955					2.36	37.855	0.0679597	7.75056					30.396	3.394	0.926692	0.516223				2.192	59.86	0.0668281	9.10463					28.34	2.08	1.66084	0.932758				3.621	63.646	0.212205	28.5415
			65.733	11.495	1.89288	2.35352					2.559	22.609	0.0736902	4.62904					18.851	5.959	0.574716	0.906356				2.527	57.729	0.0770414	8.7805					3.299	3.613	0.193335	1.62022				2.965	41.737	0.173761	18.7166
			64.292	4.831	1.85138	0.989115					1.714	27.318	0.0493572	5.59318					61.091	5.775	1.8625	0.87837				2.466	55.079	0.0751817	8.37744					35.24	3.878	2.06521	1.73906				2.939	41.589	0.172237	18.6502
			43.05	5.667	1.23969	1.16028					1.749	30.673	0.0503651	6.28009					34.315	5.103	1.04617	0.776159				4.312	49.069	0.131461	7.46333					4.968	3.314	0.291145	1.48613				8.748	21.414	0.512668	9.60292
			55.499	6.312	1.59818	1.29234					2.257	45.775	0.0649937	9.37213					36.941	6.251	1.12623	0.950769				2.258	71.857	0.0688403	10.9294					26.86	2.184	1.5741	0.979396				2.805	30.383	0.164384	13.625
			53.34	5.71	1.53601	1.16908					1.881	50.985	0.0541662	10.4388					37.168	5.144	1.13315	0.782396				2.237	78.363	0.0682001	11.9189					27.055	2.345	1.58553	1.05159				3.337	49.773	0.195562	22.3203
			54.569	5.563	1.5714	1.13899					1.961	54.786	0.0564699	11.2171					30.866	3.667	0.941021	0.557746				2.334	60.563	0.0711573	9.21155					19.539	2.195	1.14506	0.984329				2.017	45.408	0.118204	20.3628
			64.912	5.572	1.86924	1.14083					2.245	42.282	0.0646481	8.65696					52.115	7.272	1.58885	1.10606				1.808	29.717	0.055121	4.51992					30.227	3.697	1.77142	1.65789				7.178	20.863	0.42066	9.35583
			67.726	5.086	1.95027	1.04132					2.379	42.409	0.0685069	8.68296					26.921	4.038	0.820748	0.614174				2.32	39.031	0.0707305	5.93656					19.849	2.093	1.16323	0.938588				3.114	48.397	0.182493	21.7032
			55.989	4.564	1.61229	0.934449					1.515	44.59	0.0436267	9.12951					39.763	7.313	1.21227	1.1123				2.655	43.31	0.0809438	6.58739					32.755	3.149	1.91958	1.41214				11.991	35.977	0.702721	16.1336
			36.887	4.459	1.06222	0.912951					1.871	38.303	0.0538783	7.84228					35.2	3.411	1.07315	0.518809				7.751	37.706	0.236307	5.73503					3.612	3.391	0.211678	1.52066				3.055	55.699	0.179035	24.9777
			42.028	5.15	1.21026	1.05443					2.168	54.221	0.0624308	11.1014					45.861	6.644	1.39818	1.01054												20.491	2.226	1.20086	0.99823				3.024	60.032	0.177219	26.9208
			49.357	5.97	1.42131	1.22232					1.935	60.235	0.0557212	12.3327					32.044	5.004	0.976935	0.761102												31.535	2.45	1.84808	1.09868				9.515	8.398	0.557617	3.76601
			55.49	5.026	1.59792	1.02904					1.88	49.602	0.0541374	10.1557					27.098	3.292	0.826145	0.500709												3.818	3.25	0.22375	1.45743				3.209	64.906	0.18806	29.1065
			56.206	6.717	1.61854	1.37526					3.359	31.418	0.0967274	6.43263					29.638	5.353	0.903582	0.814184												31.044	2.257	1.8193	1.01213				2.572	40.749	0.15073	18.2735
			49.703	5.99	1.43127	1.22641					2.129	59.738	0.0613077	12.231					31.296	4.613	0.95413	0.701631												29.475	2.654	1.72735	1.19016				2.936	67.217	0.172061	30.1429
			60.922	5.091	1.75434	1.04235					2.359	39.458	0.0679309	8.07876					60.092	6.143	1.83204	0.934342												35.185	2.757	2.06198	1.23635				2.982	58.839	0.174757	26.3858
			47.101	4.91	1.35634	1.00529					3.128	27.789	0.0900755	5.68961					27.941	5.5	0.851845	0.836543												31.477	3.025	1.84468	1.35653				3.272	62.852	0.191752	28.1854
			47.807	6.059	1.37667	1.24054					1.722	63.445	0.0495876	12.9899					29.733	3.283	0.906479	0.49934												23.155	2.832	1.35698	1.26999				2.073	46.052	0.121486	20.6516
			49.329	6.536	1.4205	1.3382					2.259	51.536	0.0650513	10.5517					31.334	5.459	0.955289	0.830307												0.372	3.341	0.0218007	1.49824				11.345	9.576	0.664863	4.29427
			38.118	5.025	1.09766	1.02884					2.12	49.981	0.0610486	10.2333					49.936	5.969	1.52241	0.907877												22.705	2.205	1.3306	0.988813				2.492	78.674	0.146041	35.2807
			58.154	5.979	1.67463	1.22416					2.312	50.38	0.0665775	10.315					18.368	5.616	0.559991	0.854186												26.095	2.181	1.52927	0.97805				2.587	74.422	0.151609	33.3739
			61.94	5.086	1.78366	1.04132					1.829	37.333	0.0526688	7.64368					49.112	5.985	1.49729	0.910311												25.54	2.104	1.49675	0.94352				2.25	52.319	0.131859	23.462
			61.301	4.978	1.76525	1.01921					1.682	51.529	0.0484357	10.5502					35.528	4.768	1.08315	0.725206												4.078	3.2	0.238987	1.43501				2.527	71.404	0.148092	32.0205
			53.814	6.377	1.54965	1.30565					2.173	56.185	0.0625748	11.5035					56.47	6.178	1.72162	0.939666												30.466	3.661	1.78543	1.64174				2.315	30.737	0.135668	13.7837
			58.138	5.122	1.67417	1.0487					2.618	54.532	0.0753892	11.1651					34.145	5.292	1.04099	0.804906												22.251	2.261	1.304	1.01393				3.357	39.468	0.196734	17.6991
			64.907	6.611	1.86909	1.35356					2.904	23.22	0.083625	4.75414					17.38	5.901	0.529869	0.897534												15.014	2.64	0.879881	1.18388				2.264	39.494	0.13268	17.7107
			58.284	5.82	1.67838	1.19161					3.136	47.506	0.0903058	9.72654					38.367	4.97	1.16971	0.75593												38.548	3.281	2.25907	1.47134				2.473	40.896	0.144928	18.3395
			48.136	5.477	1.38615	1.12138					1.912	63.635	0.0550589	13.0288					42.768	6.336	1.30388	0.963697												23.017	2.324	1.34889	1.04218				2.866	59.119	0.167959	26.5114
			65.818	5.788	1.89533	1.18505					2.846	21.06	0.0819548	4.3119					32.361	3.935	0.986599	0.598508												30.11	2.375	1.76457	1.06505				1.54	19.775	0.0902502	8.86793
			49.1	5.785	1.41391	1.18444					3.389	15.407	0.0975913	3.15448					37.56	3.514	1.1451	0.534475												3.786	3.157	0.221875	1.41573				3.531	71.76	0.206931	32.1801
			65.954	5.42	1.89924	1.10971					2.084	43.539	0.0600119	8.91432					31.654	4.067	0.965045	0.618585												32.649	2.547	1.91336	1.14218				2.774	29.87	0.162568	13.3949
			37.736	5.194	1.08666	1.06344					2.194	37.012	0.0631795	7.57796					52.014	6.362	1.58577	0.967652												29.748	2.68	1.74335	1.20182				20.875	39.49	1.22336	17.7089
			52.706	6.417	1.51775	1.31384					2.076	36.142	0.0597815	7.39983					36.352	3.686	1.10827	0.560636												44.24	3.976	2.59264	1.783				3.208	39.081	0.188002	17.5255
			43.036	5.354	1.23929	1.0962													31.663	5.195	0.965319	0.790153												25.284	2.23	1.48174	1.00002				3.62	61.18	0.212147	27.4356
			66.509	5.446	1.91523	1.11503													20.617	4.966	0.628557	0.755322												8.912	3.921	0.522279	1.75834				2.545	49.69	0.149147	22.283
			53.28	4.912	1.53428	1.0057													34.801	5.146	1.06099	0.7827												22.972	2.284	1.34625	1.02424				2.372	61.132	0.139009	27.4141
			51.829	5.591	1.49249	1.14472													39.499	4.828	1.20422	0.734332												38.065	3.621	2.23076	1.62381				3.578	59.157	0.209685	26.5284
			39.895	3.797	1.14884	0.777411													29.794	3.068	0.908338	0.466639												29.299	2.719	1.71704	1.21931				3.273	60.481	0.191811	27.1222
			59.921	6.213	1.72552	1.27207													30.622	4.889	0.933582	0.74361												23.257	2.212	1.36295	0.991952				3.328	64.02	0.195034	28.7092
			59.435	6.188	1.71152	1.26695													44.952	4.79	1.37046	0.728553												4.795	2.83	0.281006	1.26909				4.247	45.478	0.248891	20.3942
			59.567	6.366	1.71532	1.3034													37.125	5.044	1.13184	0.767186												34.707	2.789	2.03397	1.2507				2.865	51.602	0.167901	23.1405
			58.768	4.479	1.69231	0.917046													25.824	4.86	0.787304	0.7392												3.047	2.939	0.178566	1.31797				2.647	53.637	0.155125	24.053
			63.213	5.324	1.82031	1.09005													38.174	4.935	1.16382	0.750607												31.517	2.688	1.84702	1.20541				2.371	60.645	0.13895	27.1957
			63.912	5.447	1.84044	1.11524													45.472	4.865	1.38632	0.73996												29.216	2.487	1.71218	1.11527				2.567	47.111	0.150437	21.1265
			64.263	6.13	1.85055	1.25508													36.836	4.105	1.12303	0.624365												29.822	2.453	1.74769	1.10003				3.73	78.678	0.218593	35.2825
			59.844	5.456	1.7233	1.11708													37.773	5.065	1.1516	0.77038												34.387	3.823	2.01522	1.71439				2.651	27.298	0.155359	12.2415
			60.962	6.018	1.75549	1.23215													44.899	5.188	1.36885	0.789088												2.66	3.113	0.155887	1.396				2.756	46.703	0.161513	20.9436
			57.82	6.65	1.66501	1.36154													34.023	4.426	1.03727	0.673189												32.99	2.985	1.93335	1.3386				4.061	68.224	0.237991	30.5945
			53.195	4.451	1.53183	0.911313													34.101	5.002	1.03965	0.760798												3.222	2.859	0.188822	1.28209				2.519	48.927	0.147624	21.9409
			68.655	5.17	1.97702	1.05852													31.586	3.555	0.962972	0.540711												25.501	2.276	1.49446	1.02065				3.943	61.784	0.231076	27.7065
			68.572	6.456	1.97463	1.32182													31.997	4.752	0.975502	0.722773												2.161	2.585	0.126643	1.15922				3.419	62.924	0.200367	28.2177
			69.051	5.521	1.98843	1.13039													41.767	4.28	1.27336	0.650982												6.366	2.834	0.373073	1.27088				3.477	67.275	0.203766	30.1689
			66.95	6.27	1.92793	1.28374													26.114	3.882	0.796145	0.590447												34.397	3.525	2.0158	1.58076				4.307	47.346	0.252408	21.2319
			57.313	5.441	1.65041	1.11401													29.984	3.725	0.914131	0.566568												27.405	2.732	1.60604	1.22514				3.018	52.889	0.176867	23.7176
			40.959	5.161	1.17948	1.05668													50.749	5.449	1.5472	0.828786												5.888	2.479	0.345061	1.11169				2.787	53.607	0.163329	24.0396
			61.49	5.371	1.7707	1.09968													35.096	4.18	1.06998	0.635772												24.972	2.801	1.46346	1.25608				2.895	52.454	0.169659	23.5225
			37.376	5.09	1.0763	1.04214													36.58	4.709	1.11523	0.716233												27.421	4.421	1.60698	1.98256				2.542	65.4	0.148971	29.3281
			62.893	5.765	1.8111	1.18035													41.777	4.804	1.27367	0.730682												34.394	3.263	2.01563	1.46326				3.953	83.863	0.231662	37.6076
			76.967	5.46	2.21638	1.1179													34.791	5.133	1.06068	0.780722												28.544	2.705	1.67279	1.21303				2.614	28.525	0.153191	12.7918
			52.114	4.911	1.5007	1.00549													37.069	4.841	1.13013	0.73631												6.75	2.559	0.395577	1.14756				2.758	48.906	0.16163	21.9315
			70.031	5.119	2.01665	1.04808													38.889	4.892	1.18562	0.744067												31.438	2.839	1.84239	1.27312				2.345	57.344	0.137426	25.7154
			62.353	5.124	1.79555	1.0491													36.199	4.225	1.10361	0.642617												6.807	2.636	0.398918	1.18209				3.195	31.987	0.18724	14.3443
			55.672	6	1.60316	1.22846													30.541	4.519	0.931112	0.687334												26.11	3.068	1.53015	1.37582				2.125	48.382	0.124534	21.6965
			70.495	5.547	2.03001	1.13571													38.139	4.26	1.16275	0.64794												1.1	0.602	0.0644644	0.269962				2.987	62.796	0.17505	28.1603
			49.767	5.581	1.43312	1.14267													31.317	4.401	0.954771	0.669386												1.373	0.743	0.0804633	0.333192				3.094	54.315	0.181321	24.3571
			94.815	4.527	2.73034	0.926873													28.108	5.242	0.856937	0.797301												3.995	1.405	0.234123	0.63006				1.278	4.572	0.074896	2.05027
			55.839	4.479	1.60797	0.917046													33.966	4.45	1.03553	0.676839												0.287	1.884	0.0168194	0.844863				2.783	88.028	0.163095	39.4754
			46.992	5.092	1.35321	1.04255													55.818	5.084	1.70174	0.77327												20.828	2.241	1.2206	1.00496				3.047	72.541	0.178566	32.5304
			64.603	4.912	1.86034	1.0057													22.87	3.977	0.697244	0.604896												19.761	1.894	1.15807	0.849348				2.904	55.721	0.170186	24.9876
			68.912	4.791	1.98442	0.980925													38.435	4.808	1.17178	0.73129												23.463	1.991	1.37503	0.892847				2.763	68.125	0.161923	30.5501
			76.388	5.755	2.19971	1.1783													36.348	4.684	1.10815	0.71243												25.532	2.329	1.49628	1.04442				2.536	68.93	0.14862	30.9111
			55.909	4.673	1.60998	0.956766													53.443	5.231	1.62933	0.795628												17.72	1.694	1.03846	0.759659				2.439	58.938	0.142935	26.4302
			59.417	4.312	1.711	0.882853													54.338	3.958	1.65662	0.602007												17.73	1.746	1.03905	0.782978				2.386	74.566	0.139829	33.4385
			65.233	5.522	1.87848	1.13059													28.259	4.992	0.86154	0.759277												20.483	1.992	1.20039	0.893295				3.27	70.795	0.191635	31.7474
			67.084	4.655	1.93178	0.95308													32.952	4.557	1.00462	0.693114												22.154	1.93	1.29831	0.865492				1.576	20.236	0.09236	9.07466
			55.858	4.164	1.60851	0.852551													64.708	5.231	1.97277	0.795628												2.978	0.673	0.174523	0.301801				0.983	19.062	0.0576078	8.54819
			64.154	5.629	1.84741	1.1525													29.763	4.845	0.907393	0.736918												14.564	1.463	0.853509	0.65607				2.97	65.209	0.174054	29.2424
			63.475	4.591	1.82786	0.939977													42.098	4.736	1.28345	0.720339												27.697	2.293	1.62316	1.02828				3.124	73.007	0.183079	32.7393
			54.487	4.618	1.56903	0.945505													28.465	14.326	0.867821	2.17897												19.783	1.59	1.15936	0.713022				2.757	59.501	0.161571	26.6827
			48.532	5.449	1.39755	1.11565													36.972	4.582	1.12718	0.696916												16.925	1.353	0.991873	0.606741				1.887	72.33	0.110586	32.4358
			61.28	5.659	1.76465	1.15864													34.251	8.575	1.04422	1.30425												17.37	1.395	1.01795	0.625576				2.711	52.666	0.158876	23.6176
			60.953	3.995	1.75523	0.81795													43.604	4.428	1.32937	0.673493												18.082	1.948	1.05968	0.873564				2.608	53.016	0.152839	23.7746
			52.661	4.378	1.51645	0.896366													63.428	4.812	1.93375	0.731899												20.197	1.618	1.18363	0.725578				2.54	50.844	0.148854	22.8005
			62.948	5.575	1.81268	1.14144													32.929	5.4	1.00392	0.821333												18.736	1.54	1.09801	0.6906				2.926	74.632	0.171475	33.4681
			44.791	4.007	1.28982	0.820407													33.798	4.886	1.03041	0.743154												14.552	1.276	0.852806	0.572211				2.407	53.924	0.14106	24.1817
			59.232	4.084	1.70567	0.836172													31.223	5.16	0.951905	0.784829												23.518	2.04	1.37825	0.91482				1.983	78.97	0.116212	35.4134
			75.377	4.399	2.17059	0.900666													38.483	4.663	1.17324	0.709236												17.826	1.569	1.04468	0.703604				1.803	55.117	0.105663	24.7167
			57.868	3.815	1.6664	0.781096													36.622	5.646	1.11651	0.858749												14.083	1.159	0.825321	0.519743				2.146	71.516	0.125764	32.0707
			57.02	3.965	1.64198	0.811807													40.182	4.987	1.22504	0.758516												15.204	1.233	0.891016	0.552928				2.17	77.459	0.127171	34.7358
			63.925	3.833	1.84082	0.784781													52.791	4.724	1.60945	0.718514												15.941	1.283	0.934207	0.57535				2.508	75.413	0.146979	33.8183
			67.654	5.236	1.9482	1.07204													47.61	4.553	1.4515	0.692505												13.169	1.18	0.771757	0.529161				3.482	65.116	0.204059	29.2007
			64.978	4.071	1.87114	0.83351													45.693	4.778	1.39306	0.726727												29.646	2.658	1.73738	1.19196				2.194	69.932	0.128577	31.3604
			44.23	3.83	1.27367	0.784167													13.943	7.196	0.425084	1.0945												18.058	1.654	1.05827	0.741722				2.223	54.315	0.130277	24.3571
			60.474	4.149	1.74144	0.84948													32.259	6.791	0.98349	1.0329												26.499	1.87	1.55295	0.838585				2.434	65.745	0.142642	29.4828
			67.511	3.781	1.94408	0.774135													61.533	5.385	1.87597	0.819051												10.529	1.193	0.617042	0.53499				2.087	33.33	0.122307	14.9465
			63.276	3.971	1.82213	0.813036													46.529	4.414	1.41854	0.671364												20.306	1.614	1.19001	0.723784				3.222	88.407	0.188822	39.6453
			60.179	3.668	1.73294	0.750999													42.732	5.412	1.30278	0.823158												15.099	1.156	0.884862	0.518398				2.538	65.591	0.148737	29.4137
			45.102	3.976	1.29878	0.81406													46.33	4.606	1.41248	0.700566												17.238	1.457	1.01022	0.653379				2.229	50.297	0.130628	22.5552
			71.977	4.448	2.07269	0.910698													0.741	3.384	0.0225911	0.514702												17.225	1.893	1.00945	0.848899				2.984	55.526	0.174874	24.9001
			56.744	3.52	1.63403	0.720697													46.303	4.432	1.41165	0.674101												11.396	1.005	0.667852	0.450683				2.204	43.753	0.129163	19.6206
			56.197	3.94	1.61828	0.806689													4.891	4.172	0.149113	0.634556												14.046	1.215	0.823152	0.544856				2.375	65.443	0.139185	29.3473
			17.094	2.615	0.492247	0.535404													0.255	1.152	0.00777426	0.175218												18.015	1.507	1.05575	0.675801				2.729	56.107	0.15993	25.1607
			31.525	2.629	0.90781	0.53827													41.678	3.502	1.27065	0.53265												25.223	2.209	1.47817	0.990607				2.381	46.34	0.139536	20.7808
			18.53	1.974	0.533599	0.404163													35.966	3.05	1.09651	0.463901												15.343	1.267	0.899162	0.568175				2.614	57.443	0.153191	25.7598
			17.274	2.494	0.497431	0.51063													39.876	4.281	1.21571	0.651134												10.795	1.123	0.632631	0.5036				2.412	49.217	0.141353	22.0709
			24.819	3.259	0.7147	0.667259													35.32	3.216	1.07681	0.489149												22.645	1.711	1.32709	0.767283				2.379	47.218	0.139419	21.1745
			7.271	2.664	0.209379	0.545436													34.541	3.136	1.05306	0.476981												11.553	1.07	0.677052	0.479832				2.275	65.55	0.133324	29.3953
			18.183	2.82	0.523607	0.577376													40.468	2.663	1.23376	0.405039												8.851	0.942	0.518704	0.422432				2.528	49.702	0.148151	22.2884
			33.449	2.783	0.963214	0.569801													5.144	4.08	0.156827	0.620563												21.047	2.403	1.23344	1.0776				2.325	40.291	0.136254	18.0681
			30.891	2.273	0.889553	0.465382													33.253	2.911	1.01379	0.442759												23.409	1.726	1.37186	0.77401				3.927	50.181	0.230138	22.5032
			37.643	3.221	1.08399	0.659478													27.878	3.183	0.849925	0.48413												16.53	1.193	0.968725	0.53499				2.203	45.547	0.129105	20.4252
			20.762	2.433	0.597873	0.498141													33.651	2.947	1.02593	0.448235												12.159	1.057	0.712566	0.474002				2.389	68.212	0.140005	30.5891
			37.256	2.106	1.07284	0.43119													31.362	2.974	0.956143	0.452341												19.728	1.913	1.15614	0.857868				2.552	54.243	0.149558	24.3248
			29.813	2.413	0.85851	0.494046													35.187	3.751	1.07276	0.570522												11.358	1.153	0.665625	0.517053				27.489	4.501	1.61097	2.01843
			46.924	3.115	1.35125	0.637776													33.341	2.793	1.01648	0.424812												25.475	2.362	1.49294	1.05922				2.419	71.456	0.141763	32.0438
			27.893	2.775	0.803221	0.568163													33.842	4.022	1.03175	0.611741												16.069	1.555	0.941708	0.697326				3.259	50.011	0.190991	22.427
			4.509	2.549	0.129843	0.521891													33.575	3.152	1.02361	0.479415												12.838	1.074	0.752359	0.481626				2.816	60.619	0.165029	27.1841
			25.53	2.535	0.735175	0.519024													26.431	3.188	0.80581	0.484891												11.338	0.847	0.664453	0.37983				2.715	55.225	0.15911	24.7652
			42.895	2.666	1.23523	0.545846													33.469	4.663	1.02038	0.709236												13.207	1.22	0.773984	0.547098				1.715	44.795	0.100506	20.0879
			21.332	2.535	0.614287	0.519024													26.402	3.338	0.804926	0.507705												16.728	1.339	0.980328	0.600463				2.302	74.469	0.134906	33.395
			29.199	2.286	0.840829	0.468043													38.338	4.571	1.16882	0.695243												35.045	2.158	2.05378	0.967736				3.246	59.542	0.190229	26.7011
			24.482	2.314	0.704996	0.473776													23.82	3.608	0.726207	0.548772												21.976	1.538	1.28788	0.689703				2.683	58.683	0.157235	26.3159
			43.415	3.333	1.2502	0.68241													27.114	3.38	0.826633	0.514093												15.267	1.134	0.894708	0.508532				2.607	72.414	0.152781	32.4734
			24.357	2.869	0.701396	0.587409													25.514	3.426	0.777853	0.52109												21.153	1.718	1.23965	0.770422				2.165	50.202	0.126878	22.5126
			29.354	2.567	0.845292	0.525576													34.384	4.364	1.04828	0.663759												22.608	2.204	1.32492	0.988364				0.686	4.786	0.0402024	2.14624
			31.589	3.106	0.909653	0.635933													35.964	4.265	1.09645	0.648701												28.355	2.34	1.66172	1.04935				1.503	34.798	0.0880819	15.6049
			30.24	2.759	0.870806	0.564887													27.133	3.951	0.827212	0.600942												15.881	1.668	0.930691	0.748				2.611	52.929	0.153015	23.7355
			19.911	3.519	0.573367	0.720492													29.823	4.059	0.909223	0.617368												14.382	1.295	0.842843	0.580731				2.635	53.14	0.154422	23.8302
			27.496	2.488	0.791789	0.509401													32.717	4.69	0.997453	0.713343												11.777	1.015	0.69018	0.455168				2.63	68.301	0.154129	30.629
			38.609	2.848	1.1118	0.583109													18.734	5.821	0.571149	0.885366												12.042	1.045	0.70571	0.468621				1.917	26.534	0.112344	11.8989
			25.122	2.954	0.723426	0.604812													22.664	3.874	0.690964	0.58923												14.778	1.27	0.86605	0.56952				2.113	26.438	0.12383	11.8559
			16.288	2.674	0.469037	0.547484													24.18	4.567	0.737183	0.694635												14.529	1.161	0.851458	0.52064				2.566	67.67	0.150378	30.346
			30.569	2.526	0.88028	0.517182													14.551	5.591	0.443621	0.850384												14.922	1.138	0.874489	0.510326				3.25	56.355	0.190463	25.2719
			28.978	2.592	0.834465	0.530695													26.789	4.825	0.816724	0.733876												14.419	1.118	0.845012	0.501357				1.311	7.731	0.0768299	3.4669
			30.654	2.695	0.882728	0.551783													22.322	4.138	0.680537	0.629384												10.875	0.941	0.637319	0.421983				2.98	61.473	0.17464	27.567
			40.292	2.303	1.16027	0.471524													21.438	4.023	0.653587	0.611893												23.995	1.901	1.4062	0.852487				2.599	67.854	0.152312	30.4285
			18.389	3.303	0.529539	0.676267													8.752	5.669	0.266825	0.862247												19.423	1.671	1.13827	0.749345				2.895	59.091	0.169659	26.4988
			25.664	3.132	0.739033	0.641256													22.745	3.393	0.693434	0.516071												12.532	0.967	0.734426	0.433643				2.561	48.217	0.150085	21.6225
			31.156	2.829	0.897184	0.579219													8.873	5.273	0.270514	0.802016												17.572	1.543	1.02979	0.691945				2.594	49.744	0.152019	22.3073
			22.357	2.824	0.643803	0.578195													7.312	5.118	0.222923	0.778441												11.76	1.047	0.689183	0.469518				2.077	54.18	0.121721	24.2965
			33.62	2.657	0.968138	0.544003													23.145	4.059	0.705628	0.617368												14.871	1.261	0.871501	0.565484				2.34	49.671	0.137133	22.2745
			21.038	2.963	0.605821	0.606655													26.709	4.079	0.814285	0.62041												15.732	1.364	0.921959	0.611674				2.284	67.928	0.133852	30.4617
			41.074	3.389	1.18279	0.693875													22.872	3.763	0.697305	0.572347												15.192	1.276	0.890313	0.572211				2.845	55.48	0.166728	24.8795
			46.179	3.339	1.32979	0.683638													23.09	4.259	0.703952	0.647788												28.07	2.54	1.64502	1.13904				1.861	59.188	0.109062	26.5423
			30.545	2.941	0.879589	0.60215													26.529	3.995	0.808797	0.607634												16.829	1.729	0.986247	0.775355				4.068	50.555	0.238401	22.6709
			16.019	3.366	0.461291	0.689166													23.097	5.04	0.704165	0.766577												26.743	2.439	1.56725	1.09375				1.673	26.02	0.0980446	11.6684
			9.7	2.88	0.279326	0.589661													20.778	3.897	0.633465	0.592729												18.099	1.214	1.06067	0.544408				2.478	49.718	0.145221	22.2956
			33.305	3.213	0.959067	0.65784													26.516	4.554	0.808401	0.692657												8.476	1.108	0.496728	0.496873				2.607	74.414	0.152781	33.3703
			29.35	2.841	0.845177	0.581676													27.743	4.35	0.845809	0.661629												22.296	1.502	1.30664	0.673559				3.997	70.338	0.23424	31.5425
			20.351	3.424	0.586038	0.701041													31.183	4.917	0.950685	0.747869												16.525	1.289	0.968432	0.578041				2.704	57.709	0.158465	25.8791
			21.598	3.576	0.621947	0.732162													0.254	5.952	0.00774377	0.905291												9.425	1.241	0.552343	0.556516				31.975	5.216	1.87386	2.33907
			34.411	2.55	0.990916	0.522096													26.66	4.905	0.812791	0.746044												19.84	1.608	1.1627	0.721094				2.521	77.848	0.147741	34.9103
			38.227	2.562	1.1008	0.524552													3.248	1.295	0.0990227	0.196968												12.594	1.177	0.738059	0.527815				2.264	35.756	0.13268	16.0345
			38.33	2.46	1.10377	0.503669													4.658	4.154	0.14201	0.631818												23.365	1.814	1.36928	0.813472				2.543	58.666	0.14903	26.3083
			25.893	2.894	0.745628	0.592527													36.166	3.967	1.1026	0.603375												12.671	1.282	0.742572	0.574902				3.152	49.683	0.18472	22.2799
			41.795	3.358	1.20355	0.687528													36.967	4.316	1.12702	0.656458												12.555	1.203	0.735774	0.539475				2.723	67.209	0.159579	30.1393
			32.672	2.699	0.940839	0.552602													44.2	4.387	1.34754	0.667257												18.947	1.429	1.11037	0.640823				26.674	6.093	1.5632	2.73235
			15.991	3.464	0.460485	0.709231													31.691	3.787	0.966173	0.575998												17.259	1.325	1.01145	0.594185				3.304	52.635	0.193628	23.6037
			39.782	3.18	1.14558	0.651084													33.691	4.813	1.02715	0.732051												21.068	1.853	1.23467	0.830962				2.785	52.527	0.163212	23.5553
			29.03	2.965	0.835962	0.607064													13.386	4.665	0.408103	0.70954												13.754	1.182	0.80604	0.530058				4.113	63.887	0.241038	28.6496
			34.397	2.916	0.990513	0.597032													27.675	4.028	0.843736	0.612653												16.272	1.503	0.953605	0.674007				8.393	4.619	0.491864	2.07135
			21.736	2.493	0.625921	0.510425													26.771	3.915	0.816175	0.595466												20.023	1.501	1.17343	0.67311				4.098	72.801	0.240159	32.647
			27.749	2.833	0.799074	0.580038													0.388	3.12	0.0118291	0.474548												16.726	1.351	0.980211	0.605844				1.693	55.415	0.0992166	24.8504
			32.948	2.894	0.948787	0.592527													30.514	4.401	0.930289	0.669386												25.12	1.943	1.47213	0.871321				1.701	43.542	0.0996855	19.526
			17.829	2.69	0.513413	0.55076													28.576	4.257	0.871205	0.647484												13.614	1.392	0.797835	0.62423				2.072	60.272	0.121428	27.0285
			41.536	3.69	1.19609	0.755503													24.139	3.848	0.735933	0.585276												24.331	1.478	1.42589	0.662796				1.204	14.563	0.0705593	6.53065
			25.965	2.796	0.747701	0.572462													1.06	3.827	0.0323165	0.582082												23.006	1.588	1.34824	0.712125				1.066	13.427	0.0624719	6.02122
			35.929	3.853	1.03463	0.788876													35.955	4.229	1.09617	0.643225												19.009	1.472	1.114	0.660105				0.972	13.183	0.0569631	5.9118
			19.765	3.669	0.569163	0.751203													28.608	3.927	0.872181	0.597291												24.221	1.973	1.41945	0.884775				29.724	5.919	1.74195	2.65432
			30.496	2.461	0.878178	0.503873													25.413	4.52	0.774774	0.687486												20.799	1.415	1.21891	0.634544				2.477	55.012	0.145162	24.6696
			30.393	3.452	0.875212	0.706774													19.382	4.128	0.590905	0.627863												19.401	1.892	1.13698	0.848451				2.576	50.022	0.150964	22.4319
			39.047	3.359	1.12442	0.687733													30.286	3.964	0.923338	0.602919												14.521	1.456	0.850989	0.65293				31.013	5.678	1.81749	2.54625
			20.556	3.882	0.591941	0.794814													0.432	3.698	0.0131705	0.562461												24.106	1.869	1.41271	0.838137				1.959	60.304	0.114805	27.0428
			32.469	2.773	0.934994	0.567753													20.465	3.837	0.623922	0.583603												18.704	1.716	1.09613	0.769525				4.176	53.571	0.24473	24.0234
			36.186	3.727	1.04203	0.763079													0.449	1.054	0.0136888	0.160312												14.929	1.613	0.8749	0.723336				3.019	58.158	0.176926	26.0804
			27.626	3.085	0.795532	0.631633													18.938	4.425	0.577368	0.673037												23.071	1.824	1.35205	0.817957				2.006	63.014	0.11756	28.2581
			24.914	2.473	0.717436	0.50633													14.233	4.511	0.433926	0.686117												26.051	2.226	1.52669	0.99823				2.702	21.666	0.158348	9.71593
			37.295	3.612	1.07397	0.739533													39.597	4.346	1.20721	0.661021												9.53	1.611	0.558496	0.722439				2.91	54.172	0.170538	24.293
			21.107	3.031	0.607808	0.620577													32.427	4.615	0.988612	0.701935												13.29	1.644	0.778848	0.737237				2.379	62.736	0.139419	28.1334
			20.887	3.029	0.601472	0.620168													17.462	4.042	0.532369	0.614783												22.711	1.462	1.33096	0.655621				1.814	44.302	0.106308	19.8668
			32.975	3.711	0.949565	0.759803													33.295	4.182	1.01507	0.636077												26.775	1.746	1.56912	0.782978				2.167	54.571	0.126995	24.4719
			27.015	2.893	0.777937	0.592323													1.04	2.452	0.0317068	0.372946												27.803	2.028	1.62937	0.909439				2.705	51.757	0.158524	23.21
			29.529	3.468	0.850332	0.71005													53.702	4.908	1.63723	0.7465												1.049	0.495	0.0614756	0.221978				3.012	56.038	0.176515	25.1297
			36.412	3.378	1.04854	0.691623													16.4	3.355	0.499992	0.510291												24.894	1.765	1.45889	0.791499				43.95	5.356	2.57565	2.40185
			26.652	3.032	0.767484	0.620782													0.45	1.541	0.0137193	0.234384												25.739	2.425	1.50841	1.08747				32.026	5.794	1.87685	2.59827
			32.213	2.444	0.927622	0.500393													30.97	3.335	0.944192	0.507249												12.913	1.904	0.756754	0.853832				2.026	62.185	0.118732	27.8863
			38.74	2.522	1.11558	0.516363													31.406	3.958	0.957484	0.602007												21.004	1.982	1.23092	0.888811				2.68	56.359	0.157059	25.2737
			33.499	3.129	0.964654	0.640642													46.374	4.539	1.41382	0.690376												12.013	2.003	0.70401	0.898228				34.178	6.797	2.00297	3.04806
			27.572	2.479	0.793977	0.507559													19.671	4.086	0.599716	0.621475												17.024	1.738	0.997675	0.779391				3.36	50.095	0.19691	22.4647
			44.874	3.576	1.29221	0.732162													0.254	1.811	0.00774377	0.275451												21.046	1.632	1.23338	0.731856				2.251	49.324	0.131918	22.1189
			37.591	2.836	1.08249	0.580652													26.94	4.061	0.821328	0.617673												15.812	1.953	0.926647	0.875806				2.146	38.466	0.125764	17.2497
			1.283	1.357	0.0369459	0.277837													22.137	4.735	0.674897	0.720187												16.957	1.434	0.993749	0.643065				3.297	46.717	0.193218	20.9498
			29.775	3.399	0.857416	0.695923													13.854	4.538	0.422371	0.690224												13.569	1.421	0.795198	0.637235				35.491	5.663	2.07992	2.53952
			23.469	2.708	0.675825	0.554445													21.96	4.231	0.669501	0.643529												15.796	1.72	0.925709	0.771319				3.442	74.477	0.201715	33.3986
			30.776	2.892	0.886241	0.592118													18.136	3.861	0.552918	0.587253												11.218	2.673	0.65742	1.19868				1.294	43.975	0.0758336	19.7202
			31.007	3.32	0.892893	0.679748													25.66	4.449	0.782304	0.676687												20.681	1.602	1.21199	0.718403				2.792	58.353	0.163622	26.1679
			20.349	3.392	0.58598	0.694489													27.528	3.211	0.839254	0.488389												12.165	1.434	0.712918	0.643065				2.965	38.984	0.173761	17.482
			32.751	3.384	0.943114	0.692852													9.615	2.983	0.293135	0.45371												12.206	1.627	0.715321	0.729614				4.082	68.455	0.239222	30.698
			15.258	2.578	0.439377	0.527828													17.942	4.152	0.547003	0.631514												19.537	1.844	1.14495	0.826926				3.244	46.888	0.190111	21.0265
			35.915	2.571	1.03423	0.526395													29.085	3.072	0.886723	0.467247												15.083	1.5	0.883925	0.672662				2.099	55.533	0.12301	24.9033
			19.182	3.287	0.552374	0.672991													19.48	4.385	0.593892	0.666953												14.134	1.682	0.828309	0.754278				33.678	6.628	1.97367	2.97227
			35.528	3.682	1.02308	0.753865													32.676	3.766	0.996203	0.572804												19.357	1.566	1.1344	0.702259				1.941	40.304	0.11375	18.074
			40.693	4.047	1.17182	0.828596													30.663	4.114	0.934832	0.625734												17.726	1.616	1.03882	0.724681				1.803	53.997	0.105663	24.2145
			31.27	2.682	0.900467	0.549122													17.873	4.483	0.544899	0.681858												22.057	1.496	1.29263	0.670868				42.203	5.942	2.47327	2.66464
			33.022	3.871	0.950918	0.792562													19.373	3.886	0.59063	0.591055												12.089	1.236	0.708464	0.554273				2.404	52.888	0.140884	23.7172
			23.079	3.067	0.664594	0.627948													26.324	4.094	0.802548	0.622692												18.317	2.352	1.07345	1.05473				3.033	28.71	0.177746	12.8747
			22.36	2.913	0.64389	0.596417													19.275	4.17	0.587643	0.634251												16.947	2.096	0.993163	0.939933				2.883	28.063	0.168955	12.5846
			7.694	2.94	0.22156	0.601945													27.844	4.119	0.848888	0.626494												13.63	1.224	0.798773	0.548892				2.852	69.23	0.167139	31.0456
			25.768	3.46	0.742028	0.708412													29.987	3.941	0.914223	0.599421												12.516	1.393	0.733488	0.624679				2.877	37.718	0.168604	16.9143
			24.227	2.774	0.697653	0.567958													31.006	4.293	0.945289	0.65296												16.406	1.476	0.961458	0.661899				2.185	49.365	0.12805	22.1373
			1.553	1.958	0.044721	0.400887													29.427	3.524	0.89715	0.535996												14.347	1.332	0.840792	0.597324				2.214	41.362	0.129749	18.5484
			25.622	2.899	0.737824	0.593551													26.532	3.802	0.808889	0.578279												16.08	1.894	0.942353	0.849348				2.08	37.837	0.121896	16.9677
			46.106	4.081	1.32769	0.835558													19.828	3.535	0.604502	0.537669												21.399	2.252	1.25407	1.00989				2.333	60.867	0.136723	27.2953
			37.117	4.172	1.06884	0.854189													0.415	2.369	0.0126522	0.360322												10.075	1.638	0.590436	0.734547				2.306	60.799	0.135141	27.2648
			8.761	3.064	0.252286	0.627334													18.175	4.26	0.554107	0.64794												12.037	1.337	0.705417	0.599566				2.392	67.099	0.140181	30.09
			26.053	2.675	0.750235	0.547688													24.797	4.028	0.755993	0.612653												13.619	1.497	0.798128	0.671317				2.718	80.835	0.159286	36.2497
			38.789	2.554	1.11699	0.522915													22.986	3.966	0.700781	0.603223												14.722	1.914	0.862769	0.858317				3.083	58.555	0.180676	26.2585
			26.287	3.096	0.756974	0.633885													31.053	3.915	0.946722	0.595466												16.128	1.963	0.945166	0.88029				2.179	70.554	0.127698	31.6393
			32.717	2.75	0.942135	0.563044													12.595	4.26	0.383987	0.64794												19.448	1.867	1.13973	0.83724				2.299	49.529	0.134731	22.2108
			36.698	2.538	1.05677	0.519639													8.789	4.449	0.267953	0.676687												15.014	1.338	0.879881	0.600014				2.95	61.026	0.172882	27.3666
			30.924	3.189	0.890503	0.652927													29.834	3.828	0.909558	0.582234												18.431	1.713	1.08013	0.76818				2.352	62.971	0.137837	28.2388
			38.912	4.036	1.12053	0.826344													29.526	3.955	0.900168	0.60155												15.475	1.401	0.906897	0.628266				2.13	46.645	0.124827	20.9175
			34.548	3.688	0.994861	0.755094													30.951	3.98	0.943612	0.605353												14.566	1.558	0.853626	0.698671				2.906	59.295	0.170303	26.5903
			23.828	2.357	0.686163	0.48258													27.267	3.707	0.831297	0.56383												18.599	1.598	1.08998	0.716609				2.737	41.196	0.160399	18.474
			37.854	4.139	1.09006	0.847433													30.168	3.552	0.919741	0.540254												11.85	1.341	0.694458	0.60136				3.737	23.601	0.219003	10.5837
			23.282	3.536	0.67044	0.723973													29.418	2.224	0.896875	0.338267												20.881	1.803	1.22371	0.80854				2.348	44.436	0.137602	19.9269
			38.594	3.579	1.11137	0.732776													32.277	3.633	0.984038	0.552574												18.165	1.983	1.06454	0.889259				2.475	61.456	0.145045	27.5594
			29.508	3.02	0.849727	0.618325													26.021	2.435	0.79331	0.37036												19.527	3.061	1.14436	1.37268				2.611	67.974	0.153015	30.4823
			34.236	2.536	0.985877	0.519229													28.141	3.228	0.857943	0.490974												14.208	1.346	0.832646	0.603602				2.974	65.593	0.174288	29.4146
			0.883	3.133	0.0254273	0.641461													34.782	3.156	1.06041	0.480023												18.908	1.721	1.10809	0.771767				2.862	53.714	0.167725	24.0876
			23.294	3.272	0.670786	0.66992													21.09	2.74	0.642977	0.41675												17.181	1.526	1.00688	0.684321				2.459	56.11	0.144107	25.162
			3.358	2.058	0.0966986	0.421362													28.736	2.573	0.876083	0.39135												0.434	0.495	0.0254342	0.221978				2.286	28.358	0.133969	12.7169
			33.34	2.622	0.960075	0.536837													35.024	3.42	1.06779	0.520177												20.346	2.088	1.19236	0.936345				1.782	26.985	0.104432	12.1012
			34.362	2.736	0.989505	0.560178													26.31	2.091	0.802121	0.318038												16.803	1.637	0.984724	0.734098				2.314	75.275	0.13561	33.7564
			24.823	3.845	0.714816	0.787238													28.922	1.955	0.881754	0.297353												15.838	1.502	0.928171	0.673559				3.015	51.009	0.176691	22.8745
			43.059	3.419	1.23995	0.700018													0.482	1.939	0.0146949	0.294919												16.883	1.791	0.989412	0.803158				1.183	6.196	0.0693286	2.77854
			24.445	2.456	0.70393	0.50285													0.347	1.855	0.0105791	0.282143												15.404	1.781	0.902737	0.798674				1.421	9.893	0.0832763	4.43643
			34.716	3.863	0.999699	0.790924													26.823	3.884	0.817761	0.590751												12.283	1.311	0.719833	0.587906				2.289	45.949	0.134145	20.6054
			14.035	2.846	0.404159	0.5827													19.049	2.34	0.580752	0.355911												15.846	1.676	0.92864	0.751588				3.433	46.512	0.201188	20.8579
			22.9	2.262	0.65944	0.463129													0.371	2.094	0.0113108	0.318495												18.128	2.308	1.06237	1.035				1.991	62.623	0.116681	28.0827
			41.824	4.241	1.20438	0.868317													22.478	1.917	0.685293	0.291573												13.653	1.572	0.800121	0.70495				1.918	42.304	0.112403	18.9709
			34.645	3.244	0.997655	0.664187													21.052	1.95	0.641819	0.296592												12.529	1.659	0.73425	0.743964				2.529	63.423	0.14821	28.4415
			28.922	2.359	0.832852	0.48299													23.32	1.864	0.710964	0.283512												13.726	1.432	0.804399	0.642168				2.184	52.653	0.127991	23.6118
			26.125	3.629	0.752309	0.743014													29.389	1.82	0.895991	0.27682												19.131	1.609	1.12115	0.721542				4.201	56.156	0.246196	25.1827
			30.322	2.323	0.873167	0.475619													1.666	2.101	0.0507918	0.319559												14.512	1.731	0.850462	0.776252				2.194	53.573	0.128577	24.0243
			14.622	3.258	0.421062	0.667054													23.864	3.215	0.727549	0.488997												13.103	1.585	0.767889	0.710779				2.206	54.042	0.129281	24.2347
			32.235	2.491	0.928255	0.510016													19.134	2.193	0.583344	0.333552												22.048	1.992	1.2921	0.893295				2.63	59.82	0.154129	26.8258
			17.166	4.383	0.494321	0.89739													43.848	3.719	1.33681	0.565655												15.676	1.776	0.918677	0.796432				2.674	69.208	0.156707	31.0357
			25.263	2.826	0.727486	0.578605													18.432	1.283	0.561942	0.195143												12.888	1.319	0.755289	0.591494				2.995	64.825	0.175519	29.0702
			25.864	2.586	0.744793	0.529466													0.431	2.966	0.01314	0.451125												16.565	1.486	0.970776	0.666384				2.984	62.403	0.174874	27.9841
			17.561	3.151	0.505695	0.645146													10.595	1.811	0.323013	0.275451												20.071	2.173	1.17624	0.974463				2.604	40.039	0.152605	17.9551
			16.914	4.391	0.487064	0.899028													3.107	2.445	0.094724	0.371881												12.166	1.478	0.712977	0.662796				2.511	68.623	0.147155	30.7734
			42.027	4.206	1.21023	0.861151													22.86	1.559	0.69694	0.237122												16.998	1.616	0.996151	0.724681				3.238	78.339	0.18976	35.1304
			24.084	3.11	0.693535	0.636752													25.009	2.378	0.762457	0.361691												14.221	1.94	0.833408	0.869976				2.818	44.423	0.165146	19.9211
			17.861	3.351	0.514334	0.686095													27.562	2.732	0.840291	0.415534												0.575	0.625	0.0336973	0.280276				2.726	58.237	0.159755	26.1159
			26.377	2.796	0.759565	0.572462													6.01	2.208	0.183229	0.335834												19.459	1.797	1.14038	0.805849				3.449	64.933	0.202125	29.1186
			40.044	2.736	1.15313	0.560178													15.256	1.022	0.465114	0.155445												16.704	1.804	0.978922	0.808988				2.307	63.301	0.1352	28.3868
			32.66	2.413	0.940494	0.494046													16.307	2.478	0.497156	0.3769												16.358	2.16	0.958645	0.968633				3.289	62.334	0.192749	27.9531
			24.007	3.522	0.691318	0.721106													0.375	2.471	0.0114327	0.375836												0.238	0.455	0.0139478	0.204041				2.073	20.545	0.121486	9.21323
			21.614	3.267	0.622408	0.668897													8.898	2.769	0.271276	0.421161												17.239	2.401	1.01027	1.07671				2.392	55.394	0.140181	24.841
			0.995	2.863	0.0286525	0.58618													26.347	2.96	0.803249	0.450212												0.366	0.523	0.0214491	0.234535				3.048	57.39	0.178625	25.736
			36.109	2.257	1.03981	0.462106													21.503	1.533	0.655568	0.233167												0.251	0.729	0.0147096	0.326914				2.288	67.607	0.134086	30.3178
			27.584	3.802	0.794323	0.778434													29.395	1.818	0.896174	0.276515												19.793	1.876	1.15995	0.841276				2.786	76.016	0.163271	34.0887
			16.567	2.783	0.477072	0.569801													28.957	2.43	0.882821	0.3696												19.503	2.48	1.14295	1.11213				2.551	71.479	0.149499	32.0541
			42.046	4.118	1.21078	0.843133													20.396	3.328	0.621819	0.506184												21.398	1.951	1.25401	0.874909				2.526	47.145	0.148034	21.1418
			27.655	2.765	0.796367	0.566115													25.28	1.994	0.770719	0.303285												22.436	2.171	1.31484	0.973566				2.253	48.509	0.132035	21.7534
			38.216	4.37	1.10049	0.894728													22.469	4.719	0.685019	0.717754												17.584	1.937	1.03049	0.868631				2.564	53.828	0.150261	24.1387
			12.421	3.005	0.357681	0.615254													33.806	2.537	1.03065	0.385874												26.534	2.504	1.555	1.1229				2.849	59.451	0.166963	26.6603
			16.124	2.484	0.464315	0.508583													24.726	1.856	0.753829	0.282295												18.065	1.955	1.05868	0.876703				2.447	61.704	0.143404	27.6706
			27.999	3.822	0.806273	0.782529													5.845	2.895	0.178198	0.440326												26.083	2.198	1.52857	0.985674				1.885	49.507	0.110469	22.201
			20.1	3.164	0.57881	0.647808													27.537	2.254	0.839529	0.34283												22.082	1.872	1.29409	0.839482				2.025	58.533	0.118673	26.2486
			21.882	3.166	0.630125	0.648217													27.206	3.033	0.829437	0.461315												22.317	1.966	1.30787	0.881635				0.725	5.032	0.0424879	2.25656
			39.159	3.101	1.12764	0.634909													18.751	2.767	0.571667	0.420857												18.399	2.175	1.07826	0.97536				1.468	34.899	0.0860307	15.6502
			24.876	2.307	0.716342	0.472343													25.787	2.188	0.786176	0.332792												16.755	1.989	0.981911	0.89195				2.651	54.077	0.155359	24.2504
			38.144	4.376	1.09841	0.895957													19.979	3.131	0.609106	0.476221												24.848	2.073	1.45619	0.929619				2.182	50.519	0.127874	22.6548
			34.757	3.116	1.00088	0.63798													25.327	2.006	0.772152	0.30511												14.247	1.792	0.834932	0.803607				2.068	63.86	0.121193	28.6375
			29.559	3.373	0.851196	0.690599													24.033	1.978	0.732701	0.300851												19.707	1.657	1.15491	0.743067				2.117	64.448	0.124065	28.9011
			30.463	3.018	0.877228	0.617915													9.185	2.615	0.280026	0.397738												20.951	1.984	1.22781	0.889707				6.31	62.545	0.369791	28.0478
			21.42	4.382	0.616821	0.897185													18.608	2.902	0.567308	0.44139												15.085	1.524	0.884042	0.683424				2.044	30.962	0.119787	13.8846
			26.7	3.596	0.768867	0.736257													18.588	2.874	0.566698	0.437132												19.73	2.531	1.15626	1.135				1.753	23.787	0.102733	10.6671
			33.505	3.664	0.964827	0.75018													31.765	3.26	0.968429	0.495842												14.046	1.451	0.823152	0.650688				2.549	64.943	0.149382	29.1231
			18.339	2.911	0.528099	0.596008													20.759	2.012	0.632886	0.306023												27.751	1.785	1.62632	0.800468				2.454	61.512	0.143814	27.5845
			50.337	4.644	1.44953	0.950828													2.951	1.533	0.089968	0.233167												15.964	1.756	0.935555	0.787463				1.457	8.107	0.0853861	3.63551
			23.692	3.51	0.682247	0.718649													28.657	2.402	0.873674	0.365341												22.854	2.158	1.33934	0.967736				2.785	60.369	0.163212	27.0719
			23.795	3.21	0.685213	0.657226													27.714	1.998	0.844925	0.303893												3.208	0.623	0.188002	0.279379				2.416	57.056	0.141587	25.5863
			11.358	3.136	0.327071	0.642075													27.482	2.23	0.837852	0.33918												18.755	1.996	1.09912	0.895089				2.403	62.91	0.140825	28.2114
			26.156	2.953	0.753201	0.604607													30.737	2.913	0.937088	0.443063												17.345	1.389	1.01649	0.622885				0.647	7.271	0.0379168	3.26062
			26.484	3.715	0.762647	0.760622													29.4	3.752	0.896326	0.570674												18.361	1.354	1.07603	0.607189				2.408	48.226	0.141119	21.6265
			27.656	3.294	0.796396	0.674425													19.66	2.168	0.59938	0.32975												21.641	3.02	1.26825	1.35429				2.651	67.976	0.155359	30.4832
			24.771	2.657	0.713318	0.544003													7.383	2.552	0.225088	0.388156												16.586	1.399	0.972007	0.627369				2.008	53.957	0.117677	24.1965
			20.991	3.351	0.604467	0.686095													18.496	3.285	0.563893	0.499644												15.678	1.142	0.918794	0.51212				2.881	60.608	0.168838	27.1791
			5.586	6.259	0.160857	1.28149													19.02	3.351	0.579868	0.509683												15.984	1.537	0.936727	0.689254				1.749	20.176	0.102498	9.04775
			28.038	3.112	0.807396	0.637161													43.476	3.211	1.32547	0.488389												17.186	1.638	1.00717	0.734547				1.541	58.174	0.0903088	26.0876
			19.27	4.511	0.554909	0.923597													25.52	3.282	0.778036	0.499188												21.26	1.315	1.24592	0.5897				2.385	56.563	0.139771	25.3652
			43.844	4.087	1.26255	0.836786													0.597	3.385	0.0182009	0.514854												28.218	1.758	1.65369	0.78836				1.594	25.525	0.0934148	11.4465
			25.213	3.302	0.726046	0.676063													19.792	2.608	0.603405	0.396673												15.427	1.091	0.904084	0.489249				2.131	54.487	0.124885	24.4342
			18.859	2.743	0.543073	0.561611													26.952	2.407	0.821694	0.366101												18.561	1.289	1.08775	0.578041				3.735	69.042	0.218886	30.9613
			23.196	2.882	0.667964	0.59007													20.256	3.36	0.617551	0.511052												21.265	2.084	1.24621	0.934552				2.102	29.856	0.123186	13.3887
			40.379	3.494	1.16277	0.715373													35.576	3.028	1.08462	0.460555												18	1.117	1.05487	0.500909				3.103	56.688	0.181848	25.4212
			42.949	4.595	1.23678	0.940796													13.418	2.579	0.409079	0.392262												11.606	1.504	0.680158	0.674456				2.227	53.475	0.130511	23.9804
			23.916	3.192	0.688697	0.653541													16.894	2.907	0.515052	0.442151												13.626	1.353	0.798539	0.606741				1.873	32.807	0.109765	14.712
			25.615	3.299	0.737622	0.675448													32.188	2.947	0.981325	0.448235												25.159	1.91	1.47442	0.856523				2.789	56.711	0.163447	25.4316
			23.056	3.474	0.663932	0.711278													28.217	3.469	0.86026	0.52763												18.137	1.286	1.0629	0.576695				1.949	29.57	0.114219	13.2604
			8.271	12.433	0.238176	2.54557													18.085	2.719	0.551363	0.413556												20.355	1.324	1.19289	0.593736				2.697	45.713	0.158055	20.4996
			16.761	2.528	0.482658	0.517591													21.69	3.358	0.661269	0.510747												22.578	2.025	1.32316	0.908094				2.39	48.602	0.140064	21.7951
			20.082	3.18	0.578291	0.651084													21.308	2.687	0.649623	0.408689												18.373	1.718	1.07673	0.770422
			24.708	2.506	0.711504	0.513087													12.711	2.714	0.387524	0.412796												20.897	2.995	1.22465	1.34308
			16.045	2.827	0.46204	0.578809													33.164	3.389	1.01108	0.515462												15.64	1.256	0.916567	0.563242
			29.152	3.533	0.839476	0.723358													25.466	3.172	0.776389	0.482457												19.802	1.552	1.16048	0.695981
			36.355	3.571	1.0469	0.731139													32.778	2.974	0.999313	0.452341												15.125	1.495	0.886386	0.67042
			14.614	3.371	0.420832	0.69019													38.322	3.188	1.16833	0.484891												20.034	2.542	1.17407	1.13994
			41.019	3.325	1.1812	0.680772													23.715	3.04	0.723006	0.46238												14.45	1.643	0.846828	0.736789
			47.137	4.477	1.35738	0.916636													16.193	2.74	0.493681	0.41675												16.348	1.563	0.958059	0.700914
			32.892	2.512	0.947174	0.514315													31.361	3.411	0.956112	0.518809												21.241	1.492	1.24481	0.669074
			29.699	3.379	0.855227	0.691828													26.007	2.958	0.792883	0.449908												21.637	2.386	1.26802	1.06998
			1.676	9.682	0.0482629	1.98233													30.21	3.611	0.921021	0.549228												14.89	1.522	0.872614	0.682528
			35.41	3.193	1.01968	0.653746													31.874	3.37	0.971752	0.512573												16.542	2.52	0.969428	1.13007
			21.938	2.667	0.631738	0.546051													20.348	2.636	0.620355	0.400932												15.04	1.727	0.881405	0.774458
			0.757	2.855	0.021799	0.584542													28.58	3.105	0.871327	0.472266												18.221	1.936	1.06782	0.868182
			43.801	3.656	1.26132	0.748542													22.454	3.77	0.684562	0.573412												18.177	2.247	1.06525	1.00765
			19.448	2.967	0.560034	0.607474													26.689	3.065	0.813675	0.466182												20.981	2.205	1.22957	0.988813
			26.228	3.399	0.755275	0.695923													30.018	3.402	0.915168	0.51744												16.961	2.116	0.993983	0.948902
			35.218	3.569	1.01416	0.730729													31.528	4.353	0.961203	0.662085												19.786	2.788	1.15954	1.25025
			28.314	2.674	0.815344	0.547484													24.51	3.372	0.747244	0.512877												18.084	2.063	1.0598	0.925134
			17.701	2.524	0.509727	0.516772													23.262	3.611	0.709195	0.549228												25.704	2.052	1.50636	0.920201
			27.787	3.69	0.800168	0.755503													26.446	3.657	0.806267	0.556225												18.261	2.121	1.07017	0.951144
			16.725	4.374	0.481621	0.895547													38.582	3.488	1.17626	0.53052												22.145	2.951	1.29779	1.32335
			21.446	4.233	0.61757	0.866679													21.572	3.184	0.657672	0.484282												19.834	2.153	1.16235	0.965494
			0.591	3.335	0.0170187	0.682819													39.469	3.729	1.2033	0.567176												18.692	2.615	1.09543	1.17267
			33.793	4.147	0.97312	0.849071													0.806	1.782	0.0245728	0.27104												13.005	1.328	0.762145	0.59553
			24.004	2.871	0.691231	0.587818													29.016	3.695	0.884619	0.562005												11.988	0.804	0.702545	0.360547
			19.007	2.584	0.547335	0.529057													23.305	3.585	0.710506	0.545274												8.103	1.11	0.474869	0.49777
			25.517	2.562	0.7348	0.524552													28.499	3.781	0.868857	0.575085												12.718	0.836	0.745326	0.374897
			23.532	2.197	0.677639	0.449821													33.59	4.236	1.02407	0.64429												17.046	1.139	0.998964	0.510775
			20.733	3.627	0.597038	0.742604													22.303	3.428	0.679958	0.521394												8.851	0.652	0.518704	0.292384
			6.495	3.387	0.187033	0.693466													21.332	3.243	0.650355	0.493256												12.335	0.822	0.722881	0.368619
			35.779	4.153	1.03031	0.850299													28.16	3.267	0.858522	0.496906												20.485	1.525	1.2005	0.683873
			23.658	3.274	0.681268	0.67033													20.779	3.039	0.633495	0.462228												18.013	1.175	1.05563	0.526918
			15.117	3.774	0.435317	0.772701													30.422	3.415	0.927484	0.519417												10.747	0.989	0.629818	0.443508
			22.919	3.059	0.659987	0.62631													18.372	3.686	0.560113	0.560636												5.531	0.734	0.324139	0.329156
			44.557	3.787	1.28309	0.775363													21.355	2.797	0.651056	0.42542												11.975	1.043	0.701783	0.467724
			25.579	1.937	0.736586	0.396588													29.222	2.855	0.8909	0.434242												10.129	0.942	0.5936	0.422432
			3.1	3.694	0.0892692	0.756322													33.975	2.889	1.03581	0.439413												10.918	0.973	0.639839	0.436333
			41.38	4.185	1.1916	0.856851													38.447	3.331	1.17215	0.506641												11.572	0.841	0.678166	0.377139
			33.761	3.252	0.972199	0.665825													11.56	2.771	0.352433	0.421465												10.156	0.777	0.595183	0.348439
			12.363	3.785	0.356011	0.774954													0.425	2.918	0.0129571	0.443824												18.009	1.42	1.0554	0.636787
			40.692	4.121	1.17179	0.843747													11.81	2.68	0.360055	0.407624												12.772	0.669	0.748491	0.300007
			2.27	3.117	0.0653681	0.638185													15.487	2.932	0.472157	0.445953												9.636	1.284	0.564708	0.575799
			24.706	2.926	0.711446	0.599079													26.205	2.418	0.79892	0.367775												10.296	0.64	0.603387	0.287002
			30.872	3.827	0.889006	0.783553													28.363	3.355	0.864711	0.510291												6.856	1.89	0.401789	0.847554
			28.799	3.079	0.82931	0.630405													19.882	2.367	0.606148	0.360018												20.529	1.98	1.20308	0.887914
			23.364	1.946	0.672801	0.398431													28.934	2.761	0.882119	0.419944												15.789	1.332	0.925299	0.597324
			31.464	3.466	0.906053	0.70964													32.645	2.284	0.995258	0.347393												18.494	1.284	1.08382	0.575799
			4.512	3.299	0.12993	0.675448													23.573	2.232	0.718677	0.339484												2.537	9.124	0.148678	4.09158
			20.041	3.479	0.577111	0.712302													22.747	2.301	0.693494	0.349979												14.261	1.141	0.835752	0.511671
			17.879	4.072	0.514853	0.833715													24.395	3.21	0.743738	0.488237												13.517	1.039	0.792151	0.46593
			1.175	4.009	0.0338359	0.820816													21.146	2.21	0.644684	0.336138												11.669	0.866	0.68385	0.38835
			0.568	2.389	0.0163564	0.489132													22.011	3.501	0.671056	0.532497												10.376	0.868	0.608075	0.389247
			16.138	3.397	0.464718	0.695513													28.732	2.743	0.875961	0.417207												9.685	0.994	0.56758	0.445751
			39.699	3.873	1.14319	0.792971													15.697	1.927	0.478559	0.293094												18.737	1.806	1.09806	0.809885
			43.061	2.737	1.24001	0.560383													19.135	2.294	0.583374	0.348914												15.102	0.818	0.885038	0.366825
			32.442	2.524	0.934216	0.516772													30.008	3.701	0.914863	0.562917												14.984	1.395	0.878123	0.625576
			0.579	1.811	0.0166732	0.37079													23.505	2.274	0.716604	0.345872												12.872	0.922	0.754351	0.413463
			53.646	3.136	1.54482	0.642075													25.724	2.354	0.784255	0.35804												9.289	0.93	0.544373	0.41705
			1.394	4.7	0.0401423	0.962294													29.004	1.646	0.884253	0.250354												15.09	1.239	0.884335	0.555619
			31.925	1.637	0.919328	0.335165													28.632	3.811	0.872912	0.579648												10.826	1.382	0.634447	0.619746
			0.678	6.123	0.019524	1.25364													16.629	3.064	0.506973	0.46603												9.262	0.911	0.542791	0.40853
			50.123	4.417	1.44337	0.904351													0.376	2.39	0.0114632	0.363516												10.747	0.979	0.629818	0.439024
			36.28	1.669	1.04474	0.341717													24.699	3.339	0.753006	0.507857												9.591	1.091	0.562071	0.489249
			34.341	2.055	0.988901	0.420748													24.629	1.79	0.750872	0.272257												7.042	1.251	0.41269	0.561
			1.803	4.993	0.0519201	1.02228													22.461	1.794	0.684775	0.272865												14.881	0.691	0.872087	0.309873
			51.403	4.207	1.48023	0.861355													25.756	2.184	0.785231	0.332183												6.287	11.305	0.368444	5.06963
			26.23	2.133	0.755332	0.436718													21.096	2.341	0.64316	0.356063												15.231	1.695	0.892598	0.760108
			1.194	3.014	0.034383	0.617096													19.886	1.766	0.60627	0.268606												20.429	2.11	1.19722	0.946211
			47.082	3.287	1.3558	0.672991													24.398	3.519	0.743829	0.535235												5.247	8.251	0.307495	3.70009
			24.747	1.925	0.712627	0.394131													24.359	3.191	0.74264	0.485347												10.036	0.835	0.58815	0.374448
			29.133	1.989	0.838928	0.407235													24.969	3.263	0.761237	0.496298												14.545	1.424	0.852396	0.63858
			40.148	2.649	1.15612	0.542365													26.484	1.909	0.807426	0.290356												10.889	0.88	0.638139	0.394628
			41.124	4.257	1.18423	0.871592													20.841	3.18	0.635386	0.483674												15.24	0.955	0.893126	0.428261
			37.125	2.931	1.06907	0.600103													12.746	1.75	0.388591	0.266173												10.973	0.824	0.643062	0.369516
			28.932	2.249	0.83314	0.460468													0.497	2.268	0.0151522	0.34496												15.705	1.643	0.920376	0.736789
			27.337	1.973	0.78721	0.403959													23.902	1.951	0.728707	0.296744												11.285	1.053	0.661347	0.472209
			67.17	5.194	1.93426	1.06344													23.41	2.001	0.713708	0.304349												12.192	0.808	0.7145	0.362341
			31.733	2.257	0.913799	0.462106													27.193	3.009	0.829041	0.457665												7.711	0.809	0.451896	0.362789
			33.273	2.102	0.958146	0.430371													18.418	2.158	0.561515	0.328229												13.023	1.7	0.7632	0.76235
			46.969	3.802	1.35254	0.778434													21.004	1.658	0.640355	0.25218												9.479	0.994	0.555508	0.445751
			2.966	2.523	0.0854104	0.516567													18.834	3.235	0.574198	0.492039												12.664	0.948	0.742162	0.425122
			37.517	2.875	1.08036	0.588637													11.777	2.587	0.359049	0.393479												9.462	1.153	0.554511	0.517053
			30.84	2.051	0.888084	0.419929													23.305	1.737	0.710506	0.264195												6.59	0.657	0.386201	0.294626
			38.553	2.891	1.11019	0.591913													24.951	2.792	0.760688	0.424659												5.647	1.339	0.330937	0.600463
			29.514	2.4	0.8499	0.491384													25.635	3.13	0.781542	0.476069												11.267	1.016	0.660292	0.455616
			48.828	4.223	1.40608	0.864631													5.798	3.563	0.176765	0.541928												8.127	0.867	0.476275	0.388799
			37.815	2.532	1.08894	0.51841													20.271	2.688	0.618008	0.408841												7.302	1.229	0.427927	0.551134
			42.987	3.483	1.23788	0.713121													26.271	3.022	0.800932	0.459642												12.318	0.815	0.721885	0.36548
			44.44	2.033	1.27972	0.416243													9.617	1.711	0.293196	0.260241												17.876	1.874	1.04761	0.840379
			1.878	2.622	0.0540798	0.536837													12.35	1.624	0.376518	0.247008												12.486	1.323	0.73173	0.593288
			39.315	3.169	1.13213	0.648832													22.571	2.969	0.688129	0.451581												6.649	1.007	0.389658	0.45158
			0.828	3.078	0.0238435	0.6302													5.732	3.932	0.174753	0.598052												10.182	0.706	0.596706	0.3166
			42.573	3.913	1.22595	0.801161													15.902	2.026	0.484809	0.308152												7.164	0.982	0.419839	0.440369
			0.447	2.649	0.012872	0.542365													28.027	2.257	0.854467	0.343287												6.525	0.891	0.382391	0.399561
			36.687	3.139	1.05646	0.642689													0.451	2.111	0.0137498	0.32108												0.272	1.507	0.0159403	0.675801
			4.842	23.811	0.139433	4.87514													12.678	1.895	0.386518	0.288227												5.133	1.355	0.300815	0.607638
			2.496	3.238	0.0718761	0.662959													23.445	2.43	0.714775	0.3696												14.913	1.183	0.873962	0.530506
			36.176	5.52	1.04174	1.13018													0.38	1.776	0.0115852	0.270127												8.583	0.808	0.502998	0.362341
			26.796	5.386	0.771631	1.10275													18.587	2.259	0.566667	0.343591												19.559	2.652	1.14624	1.18927
			0.465	1.944	0.0133904	0.398021													0.457	1.472	0.0139327	0.223889												7.658	1.732	0.44879	0.7767
			0.551	4.42	0.0158669	0.904966													14.588	1.581	0.444749	0.240468												9.524	0.754	0.558145	0.338125
			37.214	5.255	1.07163	1.07593													12.308	1.947	0.375238	0.296136												9.738	0.764	0.570686	0.342609
			0.713	5.973	0.0205319	1.22293													18.049	1.281	0.550265	0.194838												11.864	1.037	0.695278	0.465034
			0.648	5.43	0.0186601	1.11176													10.84	2.405	0.330482	0.365797												13.233	0.982	0.775507	0.440369
			0.884	6.085	0.0254561	1.24586													20.877	2.17	0.636483	0.330054												5.645	1.179	0.33082	0.528712
			0.781	5.419	0.0224901	1.1095													14.061	2.347	0.428682	0.356976												15.658	1.74	0.917622	0.780288
			44.828	5.614	1.29089	1.14943													29.566	2.191	0.901387	0.333248												16.141	1.528	0.945928	0.685218
			37.356	5.006	1.07572	1.02495													27.791	2.196	0.847272	0.334009												12.225	1.144	0.716434	0.513017
			36.951	4.773	1.06406	0.97724													22.404	1.74	0.683037	0.264652												9.476	0.713	0.555332	0.319739
			0.689	2.215	0.0198408	0.453507													3.163	2.65	0.0964313	0.403061												9.62	0.791	0.563771	0.354717
			42.491	4.465	1.22359	0.914179													17.324	2.85	0.528162	0.433481												4.163	2.255	0.243969	1.01123
			0.307	2.197	0.00884053	0.449821													18.929	2.155	0.577094	0.327773												8.377	0.692	0.490926	0.310321
			57.593	5.527	1.65848	1.13162													0.465	1.896	0.0141766	0.288379												9.85	0.837	0.57725	0.375345
			0.483	2.762	0.0139087	0.565501													25.296	1.914	0.771207	0.291117												10.14	1.053	0.594245	0.472209
			0.624	5.051	0.017969	1.03416													0.64	2.089	0.0195119	0.317734												9.135	0.739	0.535348	0.331398
			31.752	3.632	0.914346	0.743628													5.804	2.324	0.176948	0.353477												10.404	1.222	0.609716	0.547995
			23.524	3.718	0.677409	0.761236													3.995	1.904	0.121797	0.289596												29.448	1.958	1.72577	0.878048
			34.391	4.389	0.99034	0.898619													5.312	2.151	0.161949	0.327164												9.761	0.829	0.572034	0.371758
			35.019	4.507	1.00842	0.922778													0.398	1.534	0.0121339	0.233319												8.233	0.78	0.482487	0.349784
			38.776	5.652	1.11661	1.15721													16.237	2.232	0.495022	0.339484												6.288	0.701	0.368502	0.314357
			21.369	3.317	0.615352	0.679134													20.934	2.182	0.638221	0.331879												30.79	2.014	1.80442	0.903161
			26.057	4	0.75035	0.818973													0.612	2.638	0.0186582	0.401236												10.137	1.195	0.594069	0.535887
			29.337	3.257	0.844803	0.666849													9.479	3.057	0.288989	0.464966												13.77	1.42	0.806978	0.636787
			32.979	3.735	0.94968	0.764716													0.351	2.018	0.010701	0.306935												7.135	0.696	0.41814	0.312115
			42.009	5.142	1.20971	1.05279													12.261	3.472	0.373805	0.528087												18.089	1.824	1.06009	0.817957
			49.255	4.189	1.41837	0.85767																												10.714	1.59	0.627884	0.713022
			27.311	3.312	0.786461	0.67811																												7.654	6.004	0.448555	2.69244
			32.406	3.08	0.933179	0.63061																												18.364	1.745	1.0762	0.78253
			21.041	2.928	0.605907	0.599489																												7.793	0.721	0.456701	0.323326
			54.486	4.086	1.56901	0.836581																												10.087	1.129	0.591139	0.50629
			40.916	5.032	1.17824	1.03027																												19.317	1.877	1.13205	0.841724
			34.005	4.04	0.979225	0.827163																												14.682	1.787	0.860424	0.801364
			38.476	3.948	1.10797	0.808327																												18.846	1.682	1.10445	0.754278
			23.079	2.61	0.664594	0.53438																												10.615	0.78	0.622082	0.349784
			37.661	4.199	1.0845	0.859717																												7.388	1.072	0.432967	0.480729
			32.637	3.605	0.939831	0.7381																												24.357	1.845	1.42742	0.827374
			2.168	2.726	0.0624308	0.55813																												13.269	1.49	0.777617	0.668177
			34.884	3.674	1.00454	0.752227																												12.996	1.305	0.761618	0.585216
			27.984	2.506	0.805841	0.513087																												21.402	1.668	1.25424	0.748
			44.463	3.567	1.28038	0.73032																												13.763	1.932	0.806567	0.866388
			44.72	4.247	1.28778	0.869545																												6.89	1.214	0.403782	0.544408
			26.161	2.785	0.753345	0.57021																												7.174	0.675	0.420425	0.302698
			43.393	4.254	1.24957	0.870978																												17.61	1.893	1.03202	0.848899
			37.648	4.686	1.08413	0.959427																												12.586	1.699	0.73759	0.761902
			33.621	3.447	0.968167	0.70575																												10.658	1.78	0.624602	0.798225
			40.319	3.338	1.16105	0.683433																												13.468	1.519	0.789279	0.681182
			28.545	3.493	0.821996	0.715169																												17.336	1.292	1.01596	0.579386
			33.385	3.43	0.961371	0.70227																												12.549	1.654	0.735422	0.741722
			32.015	3.091	0.92192	0.632862																												10.746	1.778	0.629759	0.797329
			23.703	3.056	0.682563	0.625696																												16.035	1.483	0.939716	0.665038
			28.587	2.942	0.823206	0.602355																												18.397	1.576	1.07814	0.706743
			35.133	4.636	1.01171	0.94919																												12.228	1.282	0.71661	0.574902
			22.539	2.312	0.649044	0.473367																												20.206	1.267	1.18415	0.568175
			26.711	3.446	0.769183	0.705546																												15.712	1.797	0.920787	0.805849
			35.504	3.751	1.02239	0.767992																												13.261	1.825	0.777148	0.818405
			3.024	6.025	0.0870806	1.23358																												20.04	1.63	1.17442	0.730959
			26.449	3.131	0.761639	0.641051																												14.927	1.863	0.874782	0.835446
			41.275	3.234	1.18858	0.66214																												19.481	1.201	1.14167	0.538578
			43.884	3.738	1.26371	0.765331																												13.113	1.27	0.768475	0.56952
			39.867	2.943	1.14803	0.60256																												0.24	1.331	0.014065	0.596875
			23.505	2.297	0.676862	0.470295																												15.362	1.283	0.900275	0.57535
			29.597	2.651	0.85229	0.542775																												4.005	1.421	0.234709	0.637235
			29.628	2.987	0.853183	0.611568																												1.799	0.975	0.105429	0.43723
			32.571	3.379	0.937931	0.691828																												0.284	1.366	0.0166435	0.612571
			35.386	3.166	1.01899	0.648217																												13.766	1.066	0.806743	0.478038
			43.335	4.082	1.2479	0.835762																												17.064	1.535	1.00002	0.688357
			29.423	3.389	0.847279	0.693875																												19.026	1.184	1.115	0.530954
			24.931	2.954	0.717926	0.604812																												2.687	1.335	0.157469	0.598669
			31.44	2.847	0.905362	0.582904																												0.196	1.188	0.0114864	0.532748
			38.111	4.154	1.09746	0.850504																												0.227	1.055	0.0133031	0.473106
			28.91	3.73	0.832507	0.763693																												18.858	1.378	1.10515	0.617952
			33.172	3.716	0.955237	0.760826																												16.766	1.199	0.982555	0.537681
			28.166	3.36	0.811082	0.687938																												0.203	0.996	0.0118966	0.446647
			30.152	3.131	0.868272	0.641051																												0.41	1.196	0.0240277	0.536336
			20.091	2.018	0.57855	0.413172																												15.163	1.237	0.888613	0.554722
			27.532	2.456	0.792825	0.50285																												12.49	1.08	0.731964	0.484317
			17.499	2.186	0.50391	0.447569																												0.23	0.973	0.0134789	0.436333
			39.652	2.73	1.14184	0.558949																												0.185	0.918	0.0108417	0.411669
			23.659	3.581	0.681296	0.733186																												22.218	1.167	1.30206	0.523331
			3.614	3.189	0.104071	0.652927																												16.036	1.033	0.939774	0.46324
			36.582	3.52	1.05343	0.720697																												12.516	1.171	0.733488	0.525125
			26.823	2.674	0.772409	0.547484																												0.18	0.841	0.0105487	0.377139
			23.752	3.015	0.683974	0.617301																												0.414	0.855	0.0242621	0.383417
			6.111	3.656	0.175975	0.748542																												18.813	0.951	1.10252	0.426468
			22.651	2.653	0.65227	0.543184																												13.483	0.87	0.790158	0.390144
			26.956	3.038	0.776238	0.62201																												12.676	1.105	0.742865	0.495528
			25.527	2.593	0.735088	0.5309																												0.281	1.365	0.0164677	0.612122
			20.685	2.324	0.595656	0.475824																												20.071	0.751	1.17624	0.336779
			23.986	2.429	0.690713	0.497322																												0.188	1.627	0.0110176	0.729614
			26.019	2.187	0.749256	0.447774																												25.922	1.091	1.51913	0.489249
			33.689	2.516	0.970125	0.515134
			28.915	2.516	0.832651	0.515134
			18.181	1.975	0.523549	0.404368
			36.609	3.349	1.05421	0.685686
			19.418	1.859	0.55917	0.380618
			1.053	3.478	0.0303227	0.712097
			23.884	2.333	0.687776	0.477666
			31.022	3.175	0.893325	0.65006
			32.07	3.242	0.923504	0.663778
			21.876	2.521	0.629952	0.516158
			11.449	1.95	0.329691	0.39925
			31.884	2.758	0.918148	0.564682
			44.129	2.687	1.27076	0.550145
			33.474	3.018	0.963934	0.617915
			23.789	2.384	0.68504	0.488108
			27.55	2.706	0.793344	0.554036
			23.504	2.409	0.676833	0.493227
			24.098	2.261	0.693938	0.462925
			23.9	2.212	0.688236	0.452892
			35.242	2.242	1.01485	0.459035
			21.99	2.2	0.633235	0.450435
			28.909	2.423	0.832478	0.496093
			29.428	2.612	0.847423	0.53479
			24.614	2.282	0.708797	0.467224
			17.011	2.686	0.489857	0.549941
			26.808	2.531	0.771977	0.518205
			26.31	2.595	0.757636	0.531309
			4.52	2.995	0.13016	0.613206
			4.481	3.173	0.129037	0.649651
			0.795	4.455	0.0228932	0.912132
			1.2	3.092	0.0345558	0.633066
			1.472	2.073	0.0423884	0.424433
			48.292	4.968	1.39064	1.01717
			34.858	5.281	1.00379	1.08125
			38.68	4.331	1.11385	0.886743
			56.353	4.764	1.62277	0.975397
			49.346	4.773	1.42099	0.97724
			38.117	3.925	1.09764	0.803618
			34.131	3.712	0.982853	0.760007
			39.5	4.137	1.13746	0.847023
			48.767	4.928	1.40432	1.00898
			34.203	4.446	0.984927	0.910289
			50.489	4.163	1.45391	0.852347
			34.627	3.973	0.997136	0.813445
			38.665	4.163	1.11342	0.852347
			48.788	5.574	1.40492	1.14124
			35.889	4.409	1.03348	0.902713
			35.337	6.053	1.01758	1.23931
			35.739	3.569	1.02916	0.730729
			37.46	4.465	1.07872	0.914179
			39.118	3.645	1.12646	0.74629
			38.699	3.569	1.1144	0.730729
			36.189	4.227	1.04212	0.86545
			34.103	3.574	0.982047	0.731753
			41.949	4.564	1.20798	0.934449
			45.647	4.348	1.31447	0.890224
			51.578	5.343	1.48527	1.09394
			36.272	4.114	1.04451	0.842314
			38.066	4.082	1.09617	0.835762
			40.651	4.663	1.17061	0.954718
			43.722	3.652	1.25904	0.747723
			34.463	3.874	0.992414	0.793176
			50.739	5.329	1.46111	1.09108
			38.015	3.907	1.0947	0.799932
			31.249	5.399	0.899862	1.10541
			35.723	3.908	1.0287	0.800137
			40.869	4.047	1.17688	0.828596
			60.684	3.916	1.74749	0.801775
			40.126	4.166	1.15549	0.852961
			51.687	5.293	1.4884	1.08371
			47.502	3.898	1.36789	0.79809
			37.673	3.985	1.08485	0.815902
			41.204	4.293	1.18653	0.878963
			26.373	4.624	0.75945	0.946733
			40.819	4.162	1.17544	0.852142
			56.454	4.244	1.62568	0.868931
			41.142	4.468	1.18475	0.914793
			53.939	5.137	1.55325	1.05177
			49.126	4.932	1.41466	1.00979
			73.236	5.01	2.10894	1.02576
			56.733	4.1	1.63371	0.839448
			44.446	4.667	1.27989	0.955537
			51.965	4.402	1.49641	0.90128
			58.066	4.924	1.6721	1.00816
			47.947	4.394	1.38071	0.899642
			53.593	3.667	1.54329	0.750794
			22.924	3.422	0.660131	0.700632
			46.114	4.736	1.32792	0.969665
			51.863	4.875	1.49347	0.998124
			49.968	4.783	1.4389	0.979287
			57.424	4.645	1.65361	0.951033
			45.342	4.254	1.30569	0.870978
			45.016	4.609	1.2963	0.943662
			52.473	4.431	1.51104	0.907218
			54.561	4.388	1.57117	0.898414
			44.931	4.518	1.29386	0.925031
			2.32	3.559	0.0668079	0.728682
			43.34	4.162	1.24804	0.852142
			16.239	4.295	0.467626	0.879373
			0.505	2.545	0.0145422	0.521072
			41.454	4.038	1.19373	0.826754
			1.739	3.855	0.0500771	0.789286
			43.558	4.092	1.25432	0.83781
			43.06	3.81	1.23998	0.780072
			36.616	4.328	1.05441	0.886129
			27.107	3.997	0.780587	0.818359
			36.096	4.256	1.03944	0.871388
			37.947	3.81	1.09274	0.780072
			39.277	3.804	1.13104	0.778844
			2.177	2.969	0.06269	0.607883
			39.123	4.232	1.12661	0.866474
			27.592	4.177	0.794553	0.855213
			9.265	3.827	0.2668	0.783553
			38.176	3.589	1.09934	0.734824
			52.106	4.031	1.50047	0.82532
			40.382	3.724	1.16286	0.762464
			37.04	3.272	1.06662	0.66992
			26.83	3.501	0.77261	0.716807
			39.425	2.946	1.1353	0.603174
			15.065	4.217	0.433819	0.863403
			40.381	3.175	1.16283	0.65006
			2.456	3.998	0.0707242	0.818564
			32.431	3.97	0.933899	0.812831
			7.693	4.384	0.221531	0.897595
			36.417	3.416	1.04868	0.699403
			27.7	4.697	0.797663	0.96168
			48.573	3.022	1.39873	0.618734
			17.551	3.253	0.505407	0.66603
			6.167	4.334	0.177588	0.887358
			27.939	4.053	0.804545	0.829825
			25.666	2.821	0.739091	0.577581
			41.592	2.686	1.1977	0.549941
			23.046	3.74	0.663644	0.76574
			23.016	3.742	0.66278	0.76615
			24.222	4.225	0.697509	0.865041
			21.481	2.798	0.618578	0.572872
			29.384	4.359	0.846156	0.892476
			26.216	2.839	0.754929	0.581266
			18.649	2.367	0.537026	0.484628
			42.703	2.827	1.2297	0.578809
			24.463	2.307	0.704449	0.472343
			8.689	5.381	0.250213	1.10172
			9.083	5.471	0.261559	1.12015
			28.627	7.539	0.824357	1.54356
			38.69	7.697	1.11414	1.57591
			31.158	6.628	0.897241	1.35704
			38.402	6.846	1.10584	1.40167
			47.549	8.719	1.36924	1.78516
			52.236	5.349	1.50421	1.09517
			106.943	5.131	3.07958	1.05054
			0.723	8.106	0.0208199	1.65965
			40.295	7.715	1.16035	1.5796
			0.775	7.905	0.0223173	1.6185
			24.049	7.23	0.692527	1.48029
			54.833	6.267	1.579	1.28313
			0.71	8.026	0.0204455	1.64327
			26.368	7.408	0.759306	1.51674
			62.969	6.846	1.81329	1.40167
			26.74	7.185	0.770018	1.47108
			35.537	7.002	1.02334	1.43361
			0.755	7.434	0.0217414	1.52206
			37.164	7.024	1.07019	1.43812
			45.98	7.125	1.32406	1.4588
			1.529	8.891	0.0440298	1.82037
			0.716	4.786	0.0206183	0.979902
			113.859	5.755	3.27874	1.1783
			45.357	7.032	1.30612	1.43976
			58.81	6.8	1.69352	1.39225
			42.314	6.799	1.2185	1.39205
			58.02	6.482	1.67077	1.32715
			46.99	6.416	1.35315	1.31363
			29.011	8.318	0.835415	1.70306
			32.701	6.895	0.941674	1.41171
			47.041	8.454	1.35462	1.7309
			1.249	5.756	0.0359668	1.1785
			47.334	7.141	1.36305	1.46207
			40.235	6.082	1.15863	1.24525
			44.929	6.894	1.2938	1.4115
			40.821	8.162	1.1755	1.67112
			61.17	7.656	1.76148	1.56752
			1.154	4.072	0.0332312	0.833715
			46.975	7.035	1.35272	1.44037
			0.744	5.059	0.0214246	1.0358
			29.77	6.776	0.857272	1.38734
			17.58	9.892	0.506242	2.02532
			1.507	6.319	0.0433963	1.29377
			67.987	6.233	1.95779	1.27617
			44.062	7.065	1.26883	1.44651
			51.364	4.417	1.4791	0.904351
			62.763	7.794	1.80735	1.59577
			46.773	6.94	1.3469	1.42092
			56.286	7.832	1.62084	1.60355
			20.552	8.33	0.591826	1.70551
			27.953	16.001	0.804949	3.2761
			26.117	6.304	0.752078	1.2907
			1.213	7.126	0.0349302	1.459
			60.499	7.245	1.74216	1.48337
			2.889	4.713	0.0831931	0.964955
			49.624	7.732	1.429	1.58308
			22.758	13.363	0.655351	2.73599
			1.688	6.94	0.0486085	1.42092
			29.239	6.185	0.841981	1.26634
			0.758	3.897	0.0218277	0.797885
			37.823	6.69	1.08917	1.36973
			4.724	4.738	0.136035	0.970074
			29.276	4.09	0.843046	0.8374
			50.113	7.777	1.44308	1.59229
			1.519	6.096	0.0437419	1.24812
			54.8	7.281	1.57805	1.49074
			34.32	6.833	0.988296	1.39901
			4.206	3.634	0.121118	0.744037
			2.288	6.7	0.0658864	1.37178
			41.373	8.469	1.1914	1.73397
			48.402	6.598	1.39381	1.3509
			9.783	7.597	0.281716	1.55544
			34.231	6.703	0.985733	1.37239
			45.323	7.292	1.30514	1.49299
			54.841	6.839	1.57923	1.40024
			29.66	7.227	0.854104	1.47968
			0.815	8.686	0.0234691	1.7784
			1.182	6.62	0.0340375	1.3554
			44.743	6.609	1.28844	1.35315
			100.61	9.669	2.89722	1.97966
			27.494	6.893	0.791731	1.4113
			51.025	7.889	1.46934	1.61522
			1.592	6.956	0.045844	1.42419
			44.801	7.46	1.29011	1.52739
			92.825	7.861	2.67304	1.60949
			69.182	8.359	1.9922	1.71145
			51.854	7.079	1.49321	1.44938
			1.583	6.957	0.0455849	1.4244
			6.227	7.505	0.179316	1.5366
			1.084	6.604	0.0312154	1.35213
			5.923	7.281	0.170562	1.49074
			49.881	7.57	1.4364	1.54991
			3.345	9.138	0.0963243	1.87094
			53.471	6.87	1.53978	1.40659
			54.801	7.882	1.57808	1.61379
			68.814	7.459	1.9816	1.52718
			1.909	7.413	0.0549725	1.51776
			14.125	8.552	0.406751	1.75097
			1.072	5.271	0.0308698	1.0792
			72.388	7.309	2.08452	1.49647
			0.905	6.309	0.0260608	1.29173
			52.92	5.654	1.52391	1.15762
			56.031	7.642	1.6135	1.56465
			10.567	7.799	0.304293	1.59679
			1.575	5.785	0.0453545	1.18444
			1.734	4.355	0.0499331	0.891657
			33.515	6.602	0.965115	1.35172
			45.241	3.36	1.30278	0.687938
			1.655	5.492	0.0476582	1.12445
			46.635	7.43	1.34292	1.52124
			41.17	7.718	1.18555	1.58021
			14.571	7.354	0.419594	1.50568
			53.124	7.888	1.52979	1.61502
			58.804	7.601	1.69335	1.55625
			13.834	7.631	0.398371	1.5624
			64.468	7.576	1.85645	1.55114
			31.089	6.835	0.895254	1.39942
			15.704	7.483	0.45222	1.53209
			61.097	7.968	1.75938	1.6314
			76.618	5.304	2.20633	1.08596
			46.508	7.352	1.33927	1.50527
			16.126	7.574	0.464372	1.55073
			21.354	7.509	0.61492	1.53742
			60.544	7.932	1.74346	1.62402
			53.93	7.95	1.553	1.62771
			38.35	7.433	1.10435	1.52186
			21.388	6.941	0.6159	1.42112
			48.129	8.195	1.38595	1.67787
			59.139	7.573	1.703	1.55052
			50.945	4.325	1.46704	0.885515
			49.14	9.837	1.41506	2.01406
			43.289	7.739	1.24657	1.58451
			49.143	8.034	1.41515	1.64491
			42.233	7.644	1.21616	1.56506
			17.465	5.337	0.502931	1.09272
			18.725	7.572	0.539214	1.55032
			34.635	7.418	0.997367	1.51879
			60.419	7.53	1.73986	1.54172
			48.906	7.71	1.40832	1.57857
			34.462	7.319	0.992385	1.49852
			20.27	7.707	0.583705	1.57796
			64.371	5.782	1.85366	1.18383
			29.051	7.384	0.836567	1.51182
			27.93	7.098	0.804286	1.45327
			59.763	7.827	1.72097	1.60253
			18.979	6.909	0.546529	1.41457
			56.251	7.247	1.61983	1.48378
			38.032	7.729	1.09519	1.58246
			44.178	5.911	1.27217	1.21024
			40.729	7.947	1.17285	1.6271
			40.407	4.549	1.16358	0.931378
			41.791	6.964	1.20343	1.42583
			43.18	7.164	1.24343	1.46678
			67.428	7.112	1.94169	1.45613
			42.971	6.815	1.23741	1.39533
			53.149	3.939	1.53051	0.806484
			54.586	7.859	1.57189	1.60908
			44.545	6.986	1.28274	1.43034
			37.228	7.162	1.07204	1.46637
			41.884	6.618	1.20611	1.35499
			51.898	3.997	1.49448	0.818359
			40.266	6.399	1.15952	1.31015
			49.312	6.556	1.42001	1.3423
			49.025	4.059	1.41175	0.831053
			34.365	6.171	0.989592	1.26347
			51.237	6.848	1.47545	1.40208
			44.666	4.053	1.28622	0.829825
			24.209	5.554	0.697134	1.13714
			33.532	6.391	0.965604	1.30851
			29.43	4.832	0.847481	0.98932
			39.403	6.265	1.13467	1.28272
			45.781	4.353	1.31833	0.891248
			61.194	4.834	1.76217	0.989729
			41.473	5.739	1.19428	1.17502
			31.828	5.818	0.916535	1.1912
			58.86	5.133	1.69496	1.05095
			67.052	4.146	1.93086	0.848866
			32.268	5.879	0.929205	1.20369
			65.907	5.867	1.89789	1.20123
			41.497	4.42	1.19497	0.904966
			27.244	5.796	0.784532	1.18669
			48.862	4.553	1.40705	0.932197
			45.231	4.949	1.30249	1.01327
			47.883	4.468	1.37886	0.914793
			42.895	4.269	1.23523	0.874049
			28.86	4.862	0.831067	0.995462
			33.254	5.41	0.957599	1.10766
			43.74	4.184	1.25956	0.856646
			34.851	4.427	1.00359	0.906399
			17.401	4.38	0.501088	0.896776
			41.028	5.071	1.18146	1.03825
			59.646	4.487	1.7176	0.918683
			33.655	5.32	0.969146	1.08923
[truncated: 4 more columns]

## Sheet: F1FS4E,F
Flourescence intensity analysis of SOX2 and GATA6 in SHEF6 Rset hPSCs treated with ACL for 6 days using Fiji
Units =arbitrary units (a.u.)
	Exp 1								Exp 1								Exp 2								Exp 2								Exp 3								Exp 3
	Control	Average flourescence intensity (A.U.)	56.0627	6.56829	1	1			ACL	Average flourescence intensity (A.U.)	5.58656	30.7603	0.0996484	4.68316			Control	Average flourescence intensity (A.U.)	57.2675	5.06676	1	1			ACL	Average flourescence intensity (A.U.)	6.02984	29.8695	0.105293	5.89519			Control	Average flourescence intensity (A.U.)	49.1846	5.43036	1	1			ACL	Average flourescence intensity (A.U.)	9.49576	22.4044	0.193063	4.12577
			SOX2	GATA6	rel SOX2	rel GATA6					SOX2	GATA6	rel SOX2	rel GATA6					SOX2	GATA6	rel SOX2	rel GATA6					SOX2	GATA6	rel SOX2	rel GATA6					SOX2	GATA6	rel SOX2	rel GATA6					SOX2	GATA6	rel SOX2	rel GATA6
			0.592	11.83	0.0105596	1.80108					3.422	37.14	0.0610388	5.65444					91.455	5.531	1.59698	1.09162					18.262	2.83	0.318889	0.558542					0.702	13.945	0.0142727	2.56797					1.191	21.003	0.0242149	3.8677
			0.787	1.114	0.0140378	0.169603					0.902	69.461	0.0160891	10.5752					98.304	4.357	1.71657	0.859918					0.254	11.204	0.00443532	2.21127					1.929	0.987	0.0392196	0.181756					2.551	48.322	0.0518658	8.89849
			49.17	5.628	0.877053	0.856844					1.988	23.542	0.0354603	3.58419					85.786	5.889	1.49799	1.16228					36.789	0.73	0.642406	0.144076					0.669	11.591	0.0136018	2.13448					2.802	44.44	0.056969	8.18362
			43.759	7.475	0.780536	1.13804					2.095	28.883	0.0373688	4.39734					105.841	4.818	1.84818	0.950903					1.56	12.693	0.0272406	2.50515					56.714	10.289	1.15308	1.89472					6.155	1.262	0.125141	0.232397
			0.886	11.729	0.0158037	1.7857					0.986	72.387	0.0175874	11.0207					85.024	3.253	1.48468	0.642027					0.298	12.748	0.00520365	2.51601					56.231	9.756	1.14326	1.79657					8.678	0.759	0.176437	0.13977
			0.992	3.853	0.0176945	0.586606					13.036	13.229	0.232525	2.01407					86.928	4.295	1.51793	0.847681					0.265	16.083	0.0046274	3.17422					55.129	9.859	1.12086	1.81553					1.115	33.008	0.0226697	6.07842
			0.865	10.238	0.0154291	1.5587					17.189	2.566	0.306603	0.390665					90.077	7.054	1.57292	1.39221					22.921	1.042	0.400244	0.205654					55.229	8.068	1.12289	1.48572					2.941	46.978	0.0597951	8.651
			67.218	8.757	1.19898	1.33322					12.358	14.881	0.220432	2.26558					77.079	4.512	1.34595	0.890509					1.702	17.675	0.0297202	3.48842					75.556	10.238	1.53617	1.88533					6.942	0.762	0.141142	0.140322
			64.753	7.551	1.15501	1.14961					7.371	41.745	0.131478	6.35553					102.956	5.365	1.79781	1.05886					32.629	0.923	0.569764	0.182168					66.42	8.621	1.35042	1.58756					2.395	27.985	0.0486941	5.15344
			74.758	8.359	1.33347	1.27263					46.951	2.881	0.837472	0.438622					88.08	6.046	1.53804	1.19327					0.834	22.757	0.0145632	4.49143					59.583	8.919	1.21141	1.64243					0.84	38.568	0.0170785	7.10229
			64.166	7.794	1.14454	1.18661					7.25	36.895	0.129319	5.61714					98.351	4.836	1.7174	0.954456					5.045	2.185	0.0880953	0.431242					68.733	9.163	1.39745	1.68737					10.796	49.091	0.219499	9.0401
			79.253	9.271	1.41365	1.41148					6.386	68.089	0.113908	10.3663					71.754	6.436	1.25296	1.27024					2.106	49.332	0.0367748	9.73639					3.611	2.019	0.0734172	0.371799					1.274	44.392	0.0259024	8.17478
			0.693	8.9	0.0123611	1.35499					42.994	3.821	0.766891	0.581734					83.826	6.313	1.46376	1.24596					2.347	32.306	0.0409831	6.37606					61.542	8.976	1.25124	1.65293					1.567	14.403	0.0318595	2.65231
			58.956	7.126	1.05161	1.08491					17.001	2.948	0.30325	0.448823					91.245	7.262	1.59331	1.43326					1.093	30.498	0.0190859	6.01923					56.077	9.748	1.14013	1.79509					1.554	12.361	0.0315952	2.27628
			69.381	6.044	1.23756	0.920178					6.963	34.824	0.1242	5.30183					75.145	3.544	1.31217	0.69946					1.643	39.44	0.0286899	7.78406					53	8.755	1.07757	1.61223					1.781	39.957	0.0362105	7.35808
			71.964	8.222	1.28363	1.25177					39.59	2.9	0.706173	0.441515					94.263	7.272	1.64601	1.43524					0.431	24.15	0.00752608	4.76636					57.261	7.876	1.1642	1.45036					3.574	43.155	0.072665	7.94699
			91.542	7.728	1.63285	1.17656					6.416	62.808	0.114443	9.5623					92.861	5.568	1.62153	1.09893					14.94	6.549	0.260881	1.29254					68.203	7.939	1.38667	1.46197					0.939	45.787	0.0190913	8.43167
			67.9	6.077	1.21114	0.925202					1.444	34.561	0.0257569	5.26179					84.235	6.622	1.4709	1.30695					0.562	42.002	0.00981359	8.28971					45.341	8.801	0.921853	1.6207					0.89	35.514	0.0180951	6.5399
			82.623	7.231	1.47376	1.10089					35.947	2.845	0.641192	0.433142					78.998	5.987	1.37946	1.18162					3.935	20.286	0.0687126	4.00374					76.946	9.907	1.56443	1.82437					1.878	31.071	0.0381827	5.72172
			72.014	6.908	1.28453	1.05172					36.654	2.752	0.653803	0.418983					78.266	6.31	1.36667	1.24537					3.709	21.993	0.0647662	4.34064					55.94	9.832	1.13735	1.81056					1.713	66.378	0.0348279	12.2235
			7.744	8.73	0.138131	1.32911					35.328	4.405	0.630151	0.670646					75.175	6.635	1.3127	1.30951					1.439	17.407	0.0251277	3.43553					7.584	8.112	0.154194	1.49382					21.379	0.846	0.434668	0.155791
			59.264	6.08	1.0571	0.925659					36.515	2.362	0.651324	0.359606					87.819	3.802	1.53349	0.750381					51.438	0.863	0.898205	0.170326					47.299	9.627	0.961662	1.77281					2.258	39.569	0.0459086	7.28663
			92.643	9.506	1.65249	1.44726					48.396	2.306	0.863247	0.351081					73.509	4.319	1.28361	0.852418					25.738	27.964	0.449434	5.51911					39.801	7.651	0.809216	1.40893					1.712	40.567	0.0348076	7.47041
			61	7.462	1.08807	1.13606					1.447	39.663	0.0258104	6.03856					79.759	6.689	1.39274	1.32017					48.908	1.045	0.854027	0.206246					45.724	9.115	0.92964	1.67853					50.641	0.97	1.02961	0.178625
			68.292	6.016	1.21814	0.915915					5.271	53.896	0.0940197	8.20548					78.903	4.82	1.3778	0.951298					1.269	20.51	0.0221591	4.04795					38.933	7.491	0.791568	1.37947					1.553	51.917	0.0315749	9.56051
			87.058	9.352	1.55287	1.42381					48.987	3.211	0.873789	0.488864					84.039	5.854	1.46748	1.15537					2.088	13.615	0.0364604	2.68712					47.911	9.02	0.974105	1.66103					27.371	1.132	0.556495	0.208458
			91.5	7.995	1.6321	1.21721					1.117	40.052	0.0199241	6.09778					84.094	3.409	1.46844	0.672816					39.86	0.837	0.696031	0.165194					42.394	6.901	0.861936	1.27082					33.263	1.015	0.676288	0.186912
			51.543	7.375	0.919381	1.12282					43.211	2.803	0.770761	0.426747					73.904	6.373	1.2905	1.25781					1.814	46.587	0.0316759	9.19463					56.828	8.172	1.1554	1.50487					1.379	42.271	0.0280372	7.7842
			60.286	5.622	1.07533	0.85593					1.242	46.567	0.0221537	7.08967					96.467	7.232	1.6845	1.42734					5.247	10.495	0.0916226	2.07134					49.952	7.9	1.0156	1.45478					6.224	16.494	0.126544	3.03737
			69.704	6.818	1.24332	1.03802					63.914	4.931	1.14004	0.750728					68.109	5.362	1.18931	1.05827					0.422	0.609	0.00736892	0.120195					0.851	3.865	0.0173021	0.71174					2.138	15.11	0.0434689	2.78251
			69.911	5.959	1.24701	0.907237					42.775	3.386	0.762984	0.515507					83.921	5.391	1.46542	1.06399					6.728	7.053	0.117484	1.39201					47.257	8.686	0.960808	1.59953					1.213	29.183	0.0246622	5.37405
			68.265	6.16	1.21765	0.937839					0.67	19.179	0.0119509	2.91994					74.689	4.142	1.30421	0.817485					0.294	12.458	0.0051338	2.45877					51.942	9.73	1.05606	1.79178					22.271	6.762	0.452804	1.24522
			76.339	6.692	1.36167	1.01883					5.463	31.408	0.0974444	4.78176					67.957	5.914	1.18666	1.16721					9.881	10.052	0.172541	1.98391					53.612	9.575	1.09002	1.76324					2.358	25.129	0.0479418	4.6275
			50.559	5.017	0.901829	0.763821					33.064	3.242	0.589768	0.493583					91.99	5.106	1.60632	1.00774					7.779	18.629	0.135836	3.67671					63.811	8.823	1.29738	1.62475					26.976	1.314	0.548464	0.241973
			74.077	6.404	1.32132	0.974987					0.663	16.139	0.011826	2.45711					89.886	5.484	1.56958	1.08235					10.74	14.134	0.187541	2.78955					55.893	8.969	1.13639	1.65164					0.831	15.757	0.0168955	2.90165
			66.572	6.047	1.18746	0.920635					0.542	12.059	0.00966774	1.83594					102.217	6.939	1.7849	1.36951					0.745	16.213	0.0130091	3.19987					6.603	8.628	0.134249	1.58885					1.042	39.23	0.0211855	7.2242
			65.468	8.541	1.16776	1.30034					1.728	28.513	0.0308226	4.34101					65.309	4.901	1.14042	0.967284					5.189	15.755	0.0906098	3.10948					60.501	8.635	1.23008	1.59013					4.828	0.849	0.0981607	0.156343
			57.694	5.575	1.0291	0.848775					11.397	4.119	0.20329	0.627104					99.709	6.264	1.74111	1.23629					4.71	27.993	0.0822455	5.52483					51.02	7.946	1.03732	1.46326					1.453	60.948	0.0295417	11.2236
			69.342	6.68	1.23686	1.01701					1.442	45.776	0.0257212	6.96924					86.648	4.562	1.51304	0.900378					20.391	21.424	0.356066	4.22834					55.06	7.935	1.11946	1.46123					0.858	15.298	0.0174445	2.81713
			75.185	7.391	1.34109	1.12525					1.209	49.493	0.0215651	7.53514					76.367	4.066	1.33351	0.802485					4.551	6.042	0.0794691	1.19248					64.116	8.827	1.30358	1.62549					26.553	1.049	0.539864	0.193173
			75.64	8.209	1.3492	1.24979					4.967	35.131	0.0885972	5.34857					88.041	5.915	1.53736	1.16741					9.395	7.677	0.164055	1.51517					54.394	9.035	1.10591	1.66379					10.37	1.084	0.210838	0.199619
			72.337	5.599	1.29029	0.852429					2.937	45.998	0.0523877	7.00304					85.657	3.846	1.49573	0.759065					1.13	11.904	0.0197319	2.34943					71.343	8.963	1.45051	1.65054					1.271	31.11	0.0258414	5.7289
			76.036	6.443	1.35627	0.980925					2.896	28.994	0.0516564	4.41424					68.949	5.502	1.20398	1.0859					5.832	10.858	0.101838	2.14299					49.182	10.098	0.999946	1.85955					0.912	45.895	0.0185424	8.45156
			73.967	7.608	1.31936	1.15829					5.135	43.839	0.0915938	6.67434					80.431	5.785	1.40448	1.14175					20.097	5.25	0.350932	1.03616					50.981	7.605	1.03652	1.40046					0.9	26.12	0.0182984	4.81
			55.091	4.823	0.982667	0.734285					3.558	41.53	0.0634646	6.3228					91.448	5.326	1.59686	1.05116					63.209	9.54	1.10375	1.88286					48.909	8.017	0.994396	1.47633					4.087	52.174	0.083095	9.60784
			53.128	5.031	0.947652	0.765953					2.22	23.488	0.0395985	3.57597					55.607	3.543	0.971004	0.699263					9.823	9.274	0.171528	1.83036					47.518	7.282	0.966115	1.34098					1.038	49.416	0.0211041	9.09995
			65.362	6.715	1.16587	1.02234					2.197	23.588	0.0391882	3.59119					75.042	3.253	1.31038	0.642027					6.173	5.215	0.107792	1.02926					59.167	8.915	1.20296	1.6417					11.666	1.185	0.237188	0.218218
			82.097	8.979	1.46438	1.36702					13.879	29.856	0.247562	4.54547					62.093	3.447	1.08426	0.680316					19.196	5.039	0.335199	0.994521					61.848	7.95	1.25747	1.46399					0.972	39.681	0.0197623	7.30725
			52.599	6.011	0.938217	0.915154					2.374	25.35	0.0423454	3.85945					71.786	5.488	1.25352	1.08314					15.676	6.231	0.273733	1.22978					48.728	7.819	0.990716	1.43987					1.03	40.416	0.0209415	7.4426
			0.633	9.068	0.0112909	1.38057					5.133	37.524	0.0915581	5.7129					82.01	4.6	1.43205	0.907878					24.111	3.822	0.421024	0.754328					55.411	6.687	1.12659	1.23141					2.178	27.133	0.0442821	4.99654
			64.003	7.677	1.14163	1.1688					2.468	24.471	0.0440221	3.72563					79.816	4.285	1.39374	0.845708					4.187	5.561	0.073113	1.09755					37.862	6.415	0.769793	1.18132					17.608	0.83	0.357998	0.152844
			72.767	6.011	1.29796	0.915154					0.983	28.264	0.0175339	4.3031					99.546	5.414	1.73826	1.06853					6.832	8.005	0.1193	1.5799					58.753	7.923	1.19454	1.45902					1.011	44.641	0.0205552	8.22064
			66.813	12.005	1.19175	1.82772					2.184	21.487	0.0389564	3.27132					66.778	4.453	1.16607	0.878865					1.201	29.908	0.0209717	5.90278					48.377	8.819	0.983579	1.62402					13.808	0.975	0.280738	0.179546
			65.725	7.402	1.17235	1.12693					3.141	33.37	0.0560265	5.08047					76.873	4.761	1.34235	0.939653					30.935	11.508	0.540184	2.27127					54.975	9.014	1.11773	1.65993					1.4	42.876	0.0284642	7.89561
			75.382	7.347	1.3446	1.11856					6.222	26.326	0.110983	4.00804					89.789	5.331	1.56789	1.05215					2.721	1.139	0.0475138	0.224798					63.217	9.296	1.2853	1.71186					29.344	13.082	0.596609	2.40905
			61.545	5.928	1.09779	0.902518					0.657	14.81	0.011719	2.25477					67.773	4.213	1.18345	0.831497					15.679	18.183	0.273785	3.58868					42.881	7.561	0.871837	1.39236					1.711	22.835	0.0347873	4.20506
			64.327	5.862	1.14741	0.892469					4.251	51.763	0.0758258	7.88074					53.28	5.198	0.93037	1.0259					31.851	3.477	0.556179	0.686237					52.421	7.366	1.0658	1.35645					1.135	46.026	0.0230763	8.47569
			86.571	7.976	1.54418	1.21432					9.722	33.545	0.173413	5.10711					74.889	3.758	1.3077	0.741697					41.906	12.39	0.731758	2.44535					62.621	7.824	1.27318	1.44079					1.763	44.393	0.0358445	8.17497
			84.116	7.731	1.50039	1.17702					1.263	26.433	0.0225283	4.02433					85.843	4.725	1.49898	0.932548					10.848	5.37	0.189427	1.05985					54.199	9.855	1.10195	1.8148					0.923	53.544	0.018766	9.86012
			63.882	6.733	1.13947	1.02508					1.94	28.52	0.0346041	4.34207					71.562	5.789	1.24961	1.14254					18.11	5.684	0.316235	1.12182					51.041	8.571	1.03774	1.57835					0.961	42.019	0.0195386	7.7378
			70.481	7.033	1.25718	1.07075					5.3	26.151	0.0945369	3.9814					92.6	4.682	1.61697	0.924061					12.61	8.363	0.220195	1.65056					52.198	8.817	1.06127	1.62365					23.996	1.179	0.487876	0.217113
			75.896	6.275	1.35377	0.955347					0.948	2.249	0.0169096	0.342403					69.851	6.143	1.21973	1.21241					1.266	10.891	0.0221068	2.1495					56.591	7.791	1.15058	1.43471					16.992	0.676	0.345474	0.124485
			72.206	6.053	1.28795	0.921549					3.102	27.921	0.0553309	4.25088					71.039	5.471	1.24048	1.07978					6.193	15.157	0.108142	2.99146					58.616	9.656	1.19175	1.77815					0.872	56.397	0.0177291	10.3855
			66.85	5.283	1.19241	0.804319					3.014	25.601	0.0537612	3.89766					75.693	4.424	1.32174	0.873141					18.933	5.121	0.330606	1.0107					75.861	9.822	1.54237	1.80872					0.988	23.432	0.0200876	4.315
			103.061	7.881	1.83832	1.19986					4.092	29.514	0.0729896	4.49341					74.185	5.507	1.29541	1.08689					14.793	7.128	0.258314	1.40682					49.075	7.311	0.997771	1.34632					2.587	60.81	0.0525977	11.1982
			58.048	6.271	1.03541	0.954738					0.36	1.448	0.00642138	0.220453					66.651	4.825	1.16385	0.952285					20.629	7.209	0.360221	1.4228					33.21	8.312	0.675211	1.53065					26.344	1.157	0.535614	0.213061
			0.627	10.379	0.0111839	1.58017					5.355	25.667	0.095518	3.90771					76.207	5.845	1.33072	1.1536					1.1	9.898	0.0192081	1.95352					60.331	8.65	1.22662	1.5929					21.554	1.357	0.438226	0.249891
			0.684	11.481	0.0122006	1.74794					8.055	31.123	0.143678	4.73837					84.798	5.467	1.48073	1.07899					34.78	4.337	0.607325	0.855971					59.173	7.548	1.20308	1.38996					9.95	17.352	0.202299	3.19537
			50.217	4.065	0.895729	0.618882					2.665	41.367	0.047536	6.29798					82.641	5.165	1.44307	1.01939					23.633	6.101	0.412677	1.20412					63.179	9.474	1.28453	1.74464					14.952	1.262	0.303997	0.232397
			47.308	3.223	0.84384	0.490691					5.3	38.516	0.0945369	5.86393					103.738	4.893	1.81146	0.965705					36.728	11.812	0.641341	2.33127					61.46	8.947	1.24958	1.64759					19.224	0.921	0.390854	0.169602
			36.49	2.327	0.650878	0.354278					3.563	41.331	0.0635538	6.2925					47.309	5.351	0.826105	1.0561					5.461	5.869	0.0953594	1.15833					52.762	7.305	1.07273	1.34522					9.589	1.361	0.194959	0.250628
			38.585	2.222	0.688247	0.338292					0.294	0.907	0.00524412	0.138088					82.266	4.14	1.43652	0.81709					18.631	7.6	0.325333	1.49997					61.275	7.473	1.24582	1.37615					33.012	1.219	0.671185	0.224479
			44.67	2.464	0.796786	0.375136					5.538	32.697	0.0987822	4.97801					71.215	3.795	1.24355	0.748999					28.478	6.278	0.49728	1.23906					49.18	8.463	0.999906	1.55846					6.203	41.132	0.126117	7.57446
			50.524	6.257	0.901205	0.952607					3.204	42.031	0.0571503	6.39908					76.012	5.423	1.32731	1.07031					35.761	10.487	0.624455	2.06976					56.765	9.307	1.15412	1.71388					1.531	69.939	0.0311276	12.8793
			39.524	2.425	0.704996	0.369198					0.623	36.372	0.0111125	5.53751					63.43	4.991	1.10761	0.985047					2.074	0.439	0.036216	0.0866431					51.326	8.709	1.04354	1.60376					18.069	30.788	0.367371	5.66961
			58.156	4.538	1.03734	0.690895					0.413	22.973	0.00736675	3.49756					97.14	5.408	1.69625	1.06735					0.29	7.445	0.00506395	1.46938					60.948	9.752	1.23917	1.79583					21.568	1.341	0.438511	0.246945
			43.441	2.477	0.774864	0.377115					6.163	37.229	0.10993	5.66799					71.067	4.984	1.24096	0.983666					27.174	13.047	0.47451	2.57502					54.398	7.829	1.106	1.44171					35.035	1.361	0.712316	0.250628
			38.654	2.922	0.689477	0.444864					11.217	43.843	0.200079	6.67495					70.089	4.424	1.22389	0.873141					0.779	11.426	0.0136028	2.25509					60.69	8.31	1.23392	1.53029					2.642	36.367	0.053716	6.69698
			44.665	3.885	0.796697	0.591478					3.66	40.227	0.065284	6.12442					93.509	6.91	1.63284	1.36379					4.703	10.764	0.0821233	2.12443					63.858	8.17	1.29833	1.5045					1.502	72.765	0.030538	13.3997
			63.669	6.423	1.13567	0.97788					0.688	42.709	0.012272	6.5023					57.873	4.278	1.01057	0.844326					18.241	4.978	0.318522	0.982481					60.186	7.556	1.22367	1.39144					30.197	1.133	0.613952	0.208642
			38.911	2.465	0.694062	0.375288					0.836	17.479	0.0149119	2.66112					83.185	4.235	1.45257	0.835839					9.581	11.08	0.167302	2.1868					38.435	7.843	0.781443	1.44429					37.112	1.568	0.754545	0.288747
			30.789	2.48	0.549188	0.377572					0.481	18.847	0.00857967	2.86939					84.286	4.737	1.47179	0.934917					9.079	11.161	0.158537	2.20279					31.938	7.058	0.649349	1.29973					0.805	2.265	0.0163669	0.4171
			52.332	3.386	0.933454	0.515507					1.514	24.577	0.0270055	3.74176					81.744	4.519	1.42741	0.891891					13.933	8.504	0.243297	1.67839					55.531	7.284	1.12903	1.34135					32.519	1.348	0.661162	0.248234
			49.32	4.367	0.879729	0.664861					1.812	15.087	0.0323209	2.29694					77.255	4.897	1.34902	0.966495					6.964	6.766	0.121605	1.33537					69.551	8.244	1.41408	1.51813					2.521	31.036	0.0512558	5.71528
			35.761	2.159	0.637875	0.3287					24.729	2.577	0.441095	0.392339					66.856	5.964	1.16743	1.17708					37.459	17.174	0.654105	3.38954					49.902	5.915	1.01459	1.08925					10.438	18.799	0.212221	3.46183
			39.228	2.992	0.699716	0.455522					0.781	27.221	0.0139308	4.1443					75.633	4.15	1.3207	0.819063					12.914	6.378	0.225503	1.25879					62.364	9.738	1.26796	1.79325					8.694	34.771	0.176763	6.40308
			45.254	3.532	0.807203	0.537735					0.656	23.718	0.0117012	3.61098					78.743	5.741	1.375	1.13307					33.704	19.574	0.588536	3.86322					41.643	8.924	0.846667	1.64335					38.855	1.372	0.789982	0.252654
			47.542	5.975	0.848014	0.909673					2.606	21.312	0.0464836	3.24468					77.391	5.706	1.35139	1.12616					47.533	13.27	0.830016	2.61903					56.405	9.236	1.1468	1.70081					2.074	48.222	0.0421676	8.88008
			48.476	3.53	0.864674	0.53743					2.401	17.102	0.042827	2.60372					75.709	4.142	1.32202	0.817485					62.158	16.565	1.0854	3.26935					42.849	7.131	0.871187	1.31317					1.617	73.449	0.0328761	13.5256
			38.897	2.739	0.693812	0.417003					8.254	38.642	0.147228	5.88311					80.742	5.66	1.40991	1.11708					3.084	29.868	0.0538525	5.89489					0.836	1.667	0.0169972	0.306978					19.35	35.545	0.393416	6.54561
			33.36	2.581	0.595048	0.392948					6.235	35.843	0.111215	5.45697					82.951	6.056	1.44848	1.19524					2.477	57.252	0.0432531	11.2995					52.234	9.203	1.062	1.69473					2.404	45.803	0.048877	8.43462
			33.043	2.343	0.589393	0.356714					3.621	2.645	0.0645883	0.402692					85.196	8.048	1.48768	1.58839					1.915	43.299	0.0334395	8.54569					0.715	8.711	0.0145371	1.60413					23.377	41.008	0.475291	7.55162
			60.759	3.904	1.08377	0.594371					2.341	58.594	0.0417568	8.92074					78.618	4.987	1.37282	0.984258					35.583	1.664	0.621347	0.328415					56.498	8.843	1.14869	1.62844					3.58	45.644	0.072787	8.40534
			40.807	2.722	0.727881	0.414415					7.152	4.403	0.127571	0.670342					79.432	5.349	1.38703	1.0557					0.917	24.659	0.0160126	4.86682					31.666	6.438	0.643819	1.18556					32.298	1.227	0.656668	0.225952
			32.932	2.494	0.587413	0.379703					1.875	3.535	0.0334447	0.538192					74.118	4.436	1.29424	0.87551					24.344	1.377	0.425092	0.271771					49.267	7.972	1.00167	1.46804					16.128	1.202	0.327907	0.221348
			59.066	4.662	1.05357	0.709774					5.709	34.175	0.101832	5.20303					69.709	4.757	1.21725	0.938864					20.187	5.268	0.352503	1.03972					42.542	7.38	0.864945	1.35903					1.73	59.134	0.0351736	10.8895
			61.363	2.326	1.09454	0.354126					46.357	2.316	0.826877	0.352603					85.232	4.371	1.48831	0.862681					20.944	5.573	0.365722	1.09991					62.636	8.915	1.27349	1.6417					23.925	1.212	0.486432	0.22319
			43.658	2.905	0.778735	0.442276					2.074	4.342	0.0369943	0.661055					91.292	5.462	1.59413	1.07801					37.282	1.689	0.651014	0.333349					43.409	6.669	0.882572	1.2281					31.954	1.877	0.649674	0.345649
			32.031	2.418	0.571342	0.368132					2.628	19.134	0.046876	2.91309					99.741	6.101	1.74167	1.20412					9.657	13.73	0.16863	2.70982					59.264	10.684	1.20493	1.96746					29.855	1.36	0.606998	0.250444
			35.947	2.803	0.641192	0.426747					0.759	36.144	0.0135384	5.5028					57.113	4.577	0.997301	0.903338					2.357	13.834	0.0411577	2.73034					40.221	8.496	0.817755	1.56454					1.36	44.269	0.0276509	8.15213
			34.473	2.459	0.6149	0.374374					3.373	33.934	0.0601647	5.16634					63.505	5.885	1.10892	1.16149					0.653	15.239	0.0114026	3.00764					59.182	7.801	1.20326	1.43655					1.285	10.877	0.026126	2.003
			53.001	5.52	0.945387	0.840401					4.384	38.562	0.0781981	5.87093					58.682	5.106	1.0247	1.00774					18.537	12.8	0.323691	2.52627					41.748	6.769	0.848802	1.24651					28.604	37.609	0.581564	6.9257
			38.884	2.782	0.69358	0.42355					6.633	2.664	0.118314	0.405585					30.037	5.837	0.524503	1.15202					0.589	15.59	0.0102851	3.07692					50.656	8.617	1.02992	1.58682					38.765	1.495	0.788153	0.275304
			41.603	3.383	0.742079	0.51505					25.651	2.456	0.457541	0.373918					74.735	4.852	1.30501	0.957613					1.309	53.139	0.0228576	10.4878					51.741	7.061	1.05197	1.30028					0.651	15.298	0.0132358	2.81713
			59.424	4.262	1.05996	0.648875					19.803	3.201	0.353229	0.487341					91.112	5.078	1.59099	1.00222					11.114	20.667	0.194072	4.07894					63.959	8.896	1.30039	1.6382					0.477	12.091	0.00969815	2.22656
			51.5	3.452	0.918614	0.525555					3.725	38.584	0.0664434	5.87428					73.412	6.635	1.28191	1.30951					2.104	44.303	0.0367398	8.74385					49.595	8.547	1.00834	1.57393					0.501	12.273	0.0101861	2.26007
			40.282	2.574	0.718516	0.391883					22.786	2.659	0.406437	0.404824					96.076	6.983	1.67767	1.3782					50.557	1.242	0.882821	0.245127					18.574	7.409	0.377638	1.36437					0.66	12.961	0.0134188	2.38677
			42.402	3.559	0.756331	0.541846					2.799	4.1	0.0499262	0.624211					86.297	5.687	1.50691	1.12241					1.241	47.049	0.0216702	9.28581					76.774	9.486	1.56093	1.74685					0.67	12.501	0.0136221	2.30206
			38.596	2.525	0.688443	0.384423					2.695	39.497	0.0480711	6.01328					47.663	6.121	0.832286	1.20807					1.091	43.136	0.0190509	8.51352					56.472	7.794	1.14816	1.43526					9.01	1.659	0.183187	0.305505
			38.968	2.527	0.695078	0.384727					0.685	30.953	0.0122185	4.71249					66.018	6.362	1.1528	1.25563					1.281	40.489	0.0223687	7.9911					49.411	8.503	1.0046	1.56583					24.584	1.556	0.499831	0.286537
			39.319	3.184	0.701339	0.484753					5.928	4.079	0.105739	0.621014					92.866	5.196	1.62162	1.02551					30.806	2.009	0.537931	0.396506					33.569	7.104	0.68251	1.3082					1.365	24.329	0.0277526	4.48018
			31.091	2.635	0.554575	0.40117					8.564	3.922	0.152757	0.597111					99.316	5.53	1.73425	1.09143					1.272	47.407	0.0222115	9.35647					53.895	9.059	1.09577	1.66821					0.44	9.717	0.00894588	1.78938
			28.718	2.398	0.512247	0.365087					8.611	3.839	0.153596	0.584475					47.945	5.296	0.837211	1.04524					2.157	55.31	0.0376653	10.9162					36.25	6.394	0.737019	1.17745					0.352	2.171	0.00715671	0.39979
			36.893	1.901	0.658066	0.289421					6.241	4.649	0.111322	0.707794					87.654	6.371	1.53061	1.25741					1.314	44.712	0.0229449	8.82457					43.399	8.992	0.882369	1.65588					7.935	1.512	0.161331	0.278435
			62.939	4.876	1.12265	0.742354					3.477	24.351	0.0620198	3.70736					46.488	6.325	0.811769	1.24833					1.222	52.035	0.0213384	10.2699					56.282	7.936	1.1443	1.46141					36.491	1.494	0.741919	0.27512
			36.248	2.418	0.646561	0.368132					0.606	29.426	0.0108093	4.48001					12.908	5.667	0.225398	1.11847					0.582	24.073	0.0101628	4.75116					47.903	8.033	0.973942	1.47928					0.728	64.87	0.0148014	11.9458
			46.702	3.075	0.833031	0.468158					24.37	2.25	0.434692	0.342555					36.831	7.02	0.643139	1.3855					0.851	36.875	0.0148601	7.27782					47.972	8.389	0.975345	1.54483					0.357	2.172	0.00725836	0.399974
			43.896	2.67	0.78298	0.406498					7.627	18.456	0.136044	2.80986					74.056	5.109	1.29316	1.00834					0.537	21.862	0.00937704	4.31479					51.694	7.509	1.05102	1.38278					10.209	1.32	0.207565	0.243078
			38.964	2.452	0.695007	0.373309					3.092	15.803	0.0551525	2.40595					66.771	5.36	1.16595	1.05787					1.017	34.204	0.0177588	6.75066					65.619	10.221	1.33414	1.8822					0.452	10.046	0.00918986	1.84997
			62.32	4.396	1.11161	0.669276					11.415	35.179	0.203611	5.35588					70.413	5.831	1.22954	1.15083					26.627	0.961	0.464958	0.189667					1.613	7.861	0.0327948	1.4476					2.525	44.819	0.0513372	8.25342
			63.37	6.761	1.13034	1.02934					13.688	14.762	0.244155	2.24746					44.078	6.194	0.769686	1.22248					1.145	46.35	0.0199939	9.14785					54.352	7.417	1.10506	1.36584					2.382	41.028	0.0484298	7.5553
			29.911	2.285	0.533527	0.347883					16.132	2.465	0.287749	0.375288					49.327	6.007	0.861343	1.18557					0.598	19.997	0.0104422	3.9467					56.237	8.748	1.14339	1.61094					0.782	3.671	0.0158993	0.676014
			30.146	2.697	0.537719	0.410609					0.604	22.8	0.0107736	3.47122					59.937	7.082	1.04661	1.39774					0.934	2.241	0.0163094	0.442294					43.296	7.17	0.880275	1.32036					0.939	4.718	0.0190913	0.868819
			37.805	2.777	0.674334	0.422789					4.605	2.33	0.0821401	0.354735					46.236	5.038	0.807368	0.994323					1.268	55.615	0.0221417	10.9764					5.221	1.37	0.106151	0.252285					19.882	1.089	0.404232	0.200539
			33.991	3.188	0.606303	0.485362					6.161	43.047	0.109895	6.55376					56.549	6.542	0.987453	1.29116					1.964	48.26	0.0342952	9.52482					48.67	6.953	0.989537	1.28039					0.248	0.779	0.00504222	0.143453
			37.019	3.214	0.660314	0.48932					5.768	2.869	0.102885	0.436795					42.473	6.083	0.741659	1.20057					1.105	58.649	0.0192954	11.5752					54.43	10.205	1.10665	1.87925					19.188	1.663	0.390122	0.306241
			40.843	2.717	0.728523	0.413654					11.035	34.405	0.196833	5.23804					25.698	4.81	0.448736	0.949324					1.316	52.244	0.0229799	10.3111					53.178	7.805	1.08119	1.43729					4.36	60.108	0.0886456	11.0689
			31.464	2.392	0.561228	0.364174					5.601	38.429	0.0999059	5.85068					68.878	6.417	1.20274	1.26649					1.261	44.159	0.0220195	8.71543					50.946	7.259	1.03581	1.33674					7.446	52.874	0.151389	9.73674
			57.835	4.585	1.03161	0.698051					18.411	2.18	0.3284	0.331898					55.195	6.05	0.963809	1.19406					1.812	49.723	0.031641	9.81356					38.995	7.305	0.792829	1.34522					3.357	76.399	0.068253	14.0689
			31.424	2.638	0.560515	0.401626					3.125	8.65	0.0557411	1.31693					56.824	6.707	0.992255	1.32372					42.249	2.118	0.737748	0.418018					49.569	8.063	1.00781	1.4848					2.537	55.641	0.0515811	10.2463
			18.307	3.426	0.326545	0.521597					4.392	31.273	0.0783408	4.76121					66.793	6.57	1.16633	1.29669					0.827	52.241	0.014441	10.3105					44.371	9.012	0.902131	1.65956					4.307	65.269	0.087568	12.0193
			35.926	3.144	0.640818	0.478663					4.701	33.049	0.0838525	5.0316					61.608	5.486	1.07579	1.08274					1.059	55.234	0.0184922	10.9012					43.637	7.945	0.887208	1.46307					3.4	69.083	0.0691273	12.7216
			50.116	5.197	0.893927	0.791225					12.453	38.243	0.222126	5.82237					74.68	5.566	1.30405	1.09853					0.818	46.671	0.0142838	9.21121					15.813	9.11	0.321503	1.67761					14.217	1.289	0.289054	0.237369
			48.475	3.567	0.864656	0.543064					0.846	26.341	0.0150902	4.01033					51.513	4.878	0.899515	0.962745					0.603	25.121	0.0105295	4.958					46.032	7.049	0.935902	1.29807					2.713	63.576	0.0551595	11.7075
			41.38	2.57	0.738102	0.391274					6.9	3.456	0.123076	0.526164					73.346	6.759	1.28076	1.33399					0.827	51.895	0.014441	10.2422					40.524	7.33	0.823916	1.34982					6.313	47.95	0.128353	8.82999
			46.752	2.69	0.833923	0.409543					7.463	33.367	0.133119	5.08001					43.35	5.099	0.756973	1.00636					41.421	1.967	0.723289	0.388216					54.484	8.872	1.10774	1.63378					1.769	65.274	0.0359665	12.0202
			33.681	2.491	0.600773	0.379246					14.027	36.126	0.250202	5.50006					42.888	4.71	0.748906	0.929588					0.748	44.42	0.0130615	8.76694					32.944	10.403	0.669803	1.91571					2.916	48.878	0.0592868	9.00088
			41.865	3.62	0.746753	0.551133					5.347	34.131	0.0953753	5.19633					33.097	5.921	0.577936	1.1686					0.961	51	0.0167809	10.0656					23.689	9.481	0.481634	1.74593					4.726	49.267	0.0960869	9.07251
			61.899	4.656	1.1041	0.70886					2.122	61.229	0.0378504	9.32191					38.984	4.835	0.680735	0.954258					0.863	53.988	0.0150696	10.6553					25.405	10.521	0.516523	1.93744					2.717	22.241	0.0552408	4.09568
			39.505	2.961	0.704657	0.450802					4.28	46.23	0.076343	7.03836					31.144	5.127	0.543833	1.01189					0.821	48.263	0.0143362	9.52541					56.045	10.713	1.13948	1.9728					0.707	13.586	0.0143744	2.50186
			34.902	2.853	0.622552	0.434359					4.553	26.467	0.0812126	4.02951					35.685	5.157	0.623128	1.01781					1.069	23.729	0.0186668	4.68327					56.834	9.901	1.15552	1.82327					2.455	59.866	0.049914	11.0243
			36.275	3.129	0.647043	0.47638					25.362	4.084	0.452386	0.621775					61.371	5.718	1.07165	1.12853					0.713	36.67	0.0124503	7.23736					31.205	11.042	0.634446	2.03338					2.771	54.338	0.0563387	10.0063
			51.343	3.82	0.915813	0.581582					12.611	35.08	0.224944	5.34081					62.05	6.267	1.08351	1.23688					0.746	30.603	0.0130266	6.03995					55.105	10.036	1.12037	1.84813					7.132	58.045	0.145005	10.689
			47.945	3.934	0.855202	0.598938					1.211	28.117	0.0216008	4.28072					54.758	4.987	0.956179	0.984258					0.697	31.49	0.0121709	6.21501					56.03	8.21	1.13918	1.51187					3.181	64.15	0.0646747	11.8132
			40.599	3.34	0.724171	0.508504					2.965	39.598	0.0528872	6.02866					46.079	5.269	0.804627	1.03991					0.854	15.823	0.0149125	3.1229					75.609	10.092	1.53725	1.85844					2.158	60.49	0.0438755	11.1392
			35	3.308	0.6243	0.503632					4.483	45.893	0.079964	6.98705					42.705	5.701	0.74571	1.12518					0.748	30.278	0.0130615	5.97581					68.533	8.539	1.39338	1.57246					2.336	64.481	0.0474945	11.8742
			57.422	3.985	1.02425	0.606703					3.686	63.05	0.0657478	9.59915					44.453	5.339	0.776234	1.05373					1.256	31.82	0.0219321	6.28014					57.975	9.023	1.17872	1.66158					3.432	56.776	0.0697779	10.4553
			36.321	3.755	0.647863	0.571686					1.253	58.816	0.02235	8.95453					38.766	4.882	0.676928	0.963534					1.731	64.363	0.0302265	12.703					61.271	8.951	1.24573	1.64833					1.856	58.622	0.0377354	10.7952
			27.427	2.972	0.48922	0.452477					1.347	56.357	0.0240267	8.58016					4.78	8.855	0.0834679	1.74766					1.135	24.372	0.0198193	4.81017					56.175	10.001	1.14212	1.84168					3.44	45.334	0.0699405	8.34825
			50.411	3.436	0.899189	0.523119					1.238	65.931	0.0220824	10.0378					38.634	5.598	0.674623	1.10485					1.306	32.464	0.0228052	6.40725					55.627	9.212	1.13098	1.69639					1.203	45.966	0.0244589	8.46464
			45.033	3.174	0.803261	0.483231					11.19	46.786	0.199598	7.12301					58.37	7.379	1.01925	1.45635					1.062	24.139	0.0185445	4.76419					53.622	8.107	1.09022	1.4929					1.574	23.458	0.0320019	4.31979
			57.642	4.94	1.02817	0.752098					34.478	3.952	0.614989	0.601678					65.194	5.49	1.13841	1.08353					1.362	59.062	0.0237831	11.6568					66.984	7.887	1.36189	1.45239					3.87	54.958	0.0786831	10.1205
			38.668	3.592	0.689727	0.54687					1.137	43.944	0.0202808	6.69032					44.112	6.723	0.770279	1.32688					1.145	27.488	0.0199939	5.42516					49.788	9.137	1.01227	1.68258					1.877	64.935	0.0381623	11.9578
			41.11	3.455	0.733286	0.526012					1.267	59.344	0.0225997	9.03492					40.344	4.785	0.704483	0.94439					0.859	56.318	0.0149998	11.1152					77.741	9.839	1.5806	1.81185					1.014	19.467	0.0206162	3.58485
			40.01	3.687	0.713665	0.561333					19.279	47.44	0.343883	7.22258					63.506	5.723	1.10894	1.12952					1.843	35.6	0.0321823	7.02618					59.473	9.956	1.20918	1.8334					1.901	69.883	0.0386503	12.869
			37.974	3.212	0.677348	0.489016					1.098	46.641	0.0195852	7.10093					60.724	5.115	1.06036	1.00952					1.964	29.531	0.0342952	5.82838					52.189	9.659	1.06108	1.7787					0.959	20.368	0.019498	3.75077
			31.845	2.342	0.568024	0.356561					6.691	49.903	0.119348	7.59756					38.465	3.999	0.671672	0.789261					1.638	30.771	0.0286026	6.07311					41.091	7.032	0.835444	1.29494					1.069	19.635	0.0217344	3.61578
			45.364	3.849	0.809165	0.585997					48.132	5.817	0.858538	0.885618					72.907	6.054	1.27309	1.19485					1.298	60.399	0.0226655	11.9206					49.068	9.198	0.997629	1.69381					1.125	54.924	0.022873	10.1143
			57.375	4.767	1.02341	0.725759					34.138	4.925	0.608925	0.749814					48.327	6.014	0.843881	1.18695					0.852	21.81	0.0148775	4.30452					42.253	6.989	0.859069	1.28702					2.531	36.249	0.0514592	6.67525
			50.264	5.859	0.896567	0.892013					1.066	42.083	0.0190144	6.40699					39.392	5.763	0.687859	1.13741					0.364	2.521	0.00635613	0.497556					54.57	8.479	1.10949	1.56141					3.75	64.729	0.0762433	11.9198
			39.079	2.978	0.697058	0.45339					4.255	25.994	0.0758971	3.9575					66.232	5.871	1.15654	1.15873					0.829	22.238	0.0144759	4.389					50.867	8.614	1.0342	1.58627					4.128	69.757	0.0839286	12.8457
			39.113	3.103	0.697665	0.472421					7.131	33.725	0.127197	5.13452					41.661	5.117	0.72748	1.00992					0.748	28.542	0.0130615	5.63318					50.658	9.928	1.02996	1.82824					1.889	50.198	0.0384063	9.24396
			41.342	3.356	0.737424	0.51094					0.518	2.159	0.00923965	0.3287					39.974	5.384	0.698022	1.06261					0.721	25.362	0.01259	5.00556					51.384	9.863	1.04472	1.81627					1.774	55.241	0.0360682	10.1726
			29.229	2.397	0.521362	0.364935					1.711	49.726	0.0305194	7.57061					31.646	6.246	0.552599	1.23274					0.642	30.083	0.0112105	5.93732					50.474	8.697	1.02621	1.60155					2.192	48.412	0.0445668	8.91507
			34.448	2.574	0.614454	0.391883					1.508	53.227	0.0268984	8.10363					39.021	4.417	0.681381	0.87176					0.908	23.651	0.0158554	4.66787					59.807	8.291	1.21597	1.52679					1.595	67.104	0.0324288	12.3572
			34.321	2.952	0.612189	0.449432					7.35	33.781	0.131103	5.14304					65.718	6.338	1.14756	1.2509					0.873	38.185	0.0152442	7.53637					69.384	9.715	1.41068	1.78902					1.777	52.723	0.0361292	9.70894
			43.334	4.271	0.772955	0.650245					5.254	20.647	0.0937164	3.14344					77.064	6.121	1.34568	1.20807					0.583	25.976	0.0101803	5.12675					54.524	9.194	1.10856	1.69307					0.336	1.534	0.0068314	0.282486
			50.151	3.878	0.894551	0.590412					8.164	40.232	0.145623	6.12518					47.329	3.493	0.826454	0.689395					14.357	0.982	0.2507	0.193812					77.09	9.119	1.56736	1.67926					2.017	47.394	0.0410087	8.7276
			29.089	2.536	0.518865	0.386097					48.256	7.495	0.86075	1.14109					53.864	5.626	0.940568	1.11037					16.554	1.144	0.289064	0.225785					50.996	10.27	1.03683	1.89122					3.545	42.988	0.0720753	7.91624
			43.349	3.756	0.773223	0.571838					6.662	28.407	0.118831	4.32487					64.572	5.303	1.12755	1.04662					0.747	39.508	0.013044	7.79748					62.906	9.191	1.27898	1.69252					1.552	39.544	0.0315546	7.28203
			33.908	2.98	0.604822	0.453695					1.421	42.539	0.0253466	6.47642					39.058	5.511	0.682027	1.08768					1.881	46.695	0.0328458	9.21594					55.745	7.576	1.13338	1.39512					1.25	27.429	0.0254144	5.05105
			33.183	3.66	0.59189	0.557222					36.179	6.046	0.645331	0.920483					69.98	5.82	1.22198	1.14866					2.123	48.424	0.0370716	9.55719					42.319	7.817	0.860411	1.4395					1.425	29.932	0.0289725	5.51198
			46.196	2.924	0.824005	0.445169					2.418	14.543	0.0431302	2.21412					27.842	4.5	0.486174	0.888141					0.346	0.951	0.00604182	0.187694					50.091	7.039	1.01843	1.29623					21.351	1.16	0.434099	0.213614
			31.93	2.816	0.56954	0.428726					5.164	42.812	0.0921111	6.51798					63.659	5.325	1.11161	1.05097					1.392	55.424	0.024307	10.9387					60.696	8.871	1.23404	1.63359					2.045	36.382	0.041578	6.69974
			40.109	3.982	0.715431	0.606246					21.851	6.6	0.38976	1.00483					72.762	5.42	1.27056	1.06972					17.414	0.804	0.304081	0.158681					64.202	8.242	1.30533	1.51776					29.979	1.107	0.60952	0.203854
			58.487	4.042	1.04324	0.615381					3.084	52.363	0.0550098	7.97209					65.884	5.37	1.15046	1.05985					0.573	20.079	0.0100057	3.96289					59.445	7.882	1.20861	1.45147					3.126	44.073	0.0635564	8.11604
			46.644	3.698	0.831996	0.563008					4.913	38.926	0.087634	5.92635					47.357	3.528	0.826943	0.696303					6.278	24.725	0.109626	4.87984					47.447	9.035	0.964671	1.66379					1.366	42.538	0.0277729	7.83337
			35.382	2.693	0.631114	0.41					3.024	51.963	0.0539396	7.91119					53.125	4.37	0.927663	0.862484					0.907	49.292	0.0158379	9.7285					59.401	9.239	1.20771	1.70136					4.281	60.95	0.0870394	11.2239
			39.612	3.275	0.706565	0.498608					3.015	18.787	0.053779	2.86026					51.538	3.261	0.899951	0.643606					1.135	50.841	0.0198193	10.0342					65.8	9.601	1.33782	1.76802					0.385	1.551	0.00782765	0.285617
			31.636	2.967	0.564296	0.451716					2.687	16.813	0.0479284	2.55972					33.587	4.602	0.586493	0.908272					1.176	54.217	0.0205352	10.7005					52.599	7.53	1.06942	1.38665					3.428	57.712	0.0696966	10.6277
			41.757	4.012	0.744826	0.610813					5.355	50.116	0.095518	7.62999					52.073	4.649	0.909293	0.917548					1.879	55.549	0.0328109	10.9634					48.401	8.19	0.984067	1.50819					0.63	22.506	0.0128089	4.14448
			42.78	3.585	0.763074	0.545804					2.675	20.967	0.0477144	3.19215					36.397	3.615	0.635561	0.713473					12.947	1.114	0.226079	0.219864					56.831	10.201	1.15546	1.87851					0.44	1.16	0.00894588	0.213614
			38.172	2.815	0.68088	0.428574					1.348	53.786	0.0240445	8.18873					34.912	4.471	0.60963	0.882418					1.312	60.555	0.02291	11.9514					56.296	8.871	1.14458	1.63359					0.819	17.066	0.0166515	3.1427
			42.063	4.122	0.750284	0.62756					5.199	29.175	0.0927354	4.44179					61.163	5.105	1.06802	1.00755					1.636	40.538	0.0285677	8.00077					56.798	9.347	1.15479	1.72125					4.179	0.66	0.0849656	0.121539
			44.317	3.037	0.790489	0.462373					2.805	17.761	0.0500332	2.70405					39.135	5.344	0.683371	1.05472					0.599	22.931	0.0104597	4.52577					71.353	10.032	1.45072	1.84739					4.332	21.145	0.0880763	3.89385
			56.317	3.133	1.00454	0.476989					2.657	21.766	0.0473933	3.3138					54.597	6.555	0.953367	1.29373					1.096	52.908	0.0191382	10.4422					49.76	7.098	1.0117	1.3071					16.772	0.85	0.341001	0.156527
			47.597	3.908	0.848995	0.59498					2.613	16.168	0.0466085	2.46152					65.546	5.368	1.14456	1.05945					0.9	47.435	0.0157157	9.36199					31.514	8.119	0.640728	1.49511					0.732	17.747	0.0148827	3.26811
			40.718	3.403	0.726293	0.518095					1.081	28.297	0.019282	4.30812					55.093	6.917	0.962028	1.36517					1.496	45.37	0.026123	8.95444					63.005	8.662	1.28099	1.59511					0.652	18.174	0.0132562	3.34674
			47.322	2.775	0.84409	0.422484					1.548	26.389	0.0276119	4.01763					40.392	4.015	0.705321	0.792419					0.707	32.669	0.0123456	6.44771					63.756	9.986	1.29626	1.83892					1.247	32.47	0.0253534	5.97935
			57.007	3.379	1.01684	0.514441					1.5	37.962	0.0267557	5.77958					53.027	5.16	0.925952	1.0184					13.023	1.541	0.227406	0.304139					63.653	8.723	1.29416	1.60634					0.361	0.622	0.00733969	0.114541
			41.627	4.065	0.742507	0.618882					1.685	51.208	0.0300556	7.79624					0.641	3.182	0.0111931	0.628014					43.432	1.561	0.758405	0.308086					70.436	8.83	1.43207	1.62604					1.325	0.562	0.0269393	0.103492
			41.275	3.501	0.736229	0.533015					1.141	29.127	0.0203522	4.43449					61.53	4.664	1.07443	0.920509					33.081	1.431	0.577657	0.282429					54.905	8.65	1.1163	1.5929					4.63	0.664	0.0941351	0.122276
			42.954	2.72	0.766177	0.414111					1.78	26.655	0.0317501	4.05813					34.363	6.784	0.600043	1.33892					0.914	24.282	0.0159602	4.79241					54.867	9.214	1.11553	1.69676					0.319	0.48	0.00648576	0.088392
			46.441	3.024	0.828375	0.460394					1.808	19.968	0.0322496	3.04006					54.062	5.151	0.944025	1.01663					1.47	45.662	0.025669	9.01207					50.51	8.84	1.02695	1.62789					1.549	39.271	0.0314936	7.23175
			34.881	2.594	0.622178	0.394928					1.726	41.68	0.0307869	6.34564					59.772	5.011	1.04373	0.988994					1.486	44.716	0.0259484	8.82536					63.304	9.637	1.28707	1.77465					1.333	27.443	0.027102	5.05363
			33.29	3.116	0.593799	0.4744					1.84	23.225	0.0328204	3.53593					44.664	5.86	0.779918	1.15656					0.674	16.009	0.0117693	3.15961					62.257	8.389	1.26578	1.54483					1.714	42.142	0.0348483	7.76045
			53.217	3.975	0.94924	0.60518					2.277	24.339	0.0406152	3.70553					35.877	6.404	0.626481	1.26392					1.468	28.486	0.0256341	5.62213					57.784	6.485	1.17484	1.19421					1.58	0.697	0.0321239	0.128353
			43.448	3.735	0.774989	0.568641					1.684	14.6	0.0300378	2.2228					39.978	4.631	0.698092	0.913996					0.895	25.49	0.0156284	5.03083					61.546	7.741	1.25133	1.4255					0.665	0.393	0.0135205	0.0723709
			39.317	3.178	0.701303	0.48384					1.578	48.003	0.028147	7.30829					39.614	6.06	0.691736	1.19603					17.914	1.359	0.312812	0.268219					63.081	7.596	1.28253	1.3988					9.5	0.857	0.19315	0.157816
			54.822	4.955	0.977869	0.754382					1.712	15.037	0.0305372	2.28933					55.136	5.319	0.962779	1.04978					24.913	1.247	0.435028	0.246114					40.68	8.174	0.827087	1.50524					2.092	31.183	0.0425336	5.74235
			44.88	3.304	0.800532	0.503023					1.613	28.408	0.0287713	4.32502					53.68	5.399	0.937355	1.06557					0.646	17.673	0.0112804	3.48803					33.021	7.179	0.671368	1.32201					3.484	38.203	0.0708351	7.03508
			47.275	4.027	0.843252	0.613097					1.716	29.076	0.0306086	4.42672					33.143	5.542	0.57874	1.0938					0.732	42.467	0.0127821	8.38149					63.394	9.956	1.2889	1.8334					1.901	42.01	0.0386503	7.73614
			41.772	3.202	0.745094	0.487494					1.704	27.156	0.0303945	4.13441					49.772	5.2	0.869114	1.0263					1.028	24.263	0.0179508	4.78866					44.503	10.068	0.904815	1.85402					0.421	0.633	0.00855958	0.116567
			38.516	3.041	0.687016	0.462982					2.827	42.318	0.0504256	6.44277					56.874	5.401	0.993128	1.06597					0.671	17.687	0.0117169	3.49079					57.79	9.187	1.17496	1.69179					0.958	1.652	0.0194776	0.304216
			47.055	3.02	0.839327	0.459785					3.13	31.966	0.0558303	4.86671					29.026	3.797	0.506849	0.749394					28.662	1.543	0.500493	0.304534					47.181	7.144	0.959263	1.31557					1.075	29.237	0.0218564	5.38399
			41.831	3.17	0.746146	0.482622					3.077	26.732	0.0548849	4.06986					0.426	2.223	0.00743877	0.438742					1.338	39.931	0.023364	7.88097					0.678	1.529	0.0137848	0.281565					1.68	0.778	0.034157	0.143269
			37.637	4.062	0.671337	0.618426					0.454	3.704	0.00809807	0.563921					63.554	5.86	1.10977	1.15656					0.76	23.483	0.013271	4.63472					0.77	8.35	0.0156553	1.53765					26.654	0.595	0.541917	0.109569
			36.341	3.369	0.64822	0.512919					2.758	42.038	0.0491949	6.40014					35.844	5.785	0.625904	1.14175					1.086	26.309	0.0189636	5.19247					33.709	6.724	0.685356	1.23822					1.593	35.416	0.0323882	6.52185
			47.756	5.021	0.851831	0.76443					2.567	46.711	0.045788	7.11159					51.925	5.883	0.906709	1.1611					2.585	50.615	0.045139	9.98961					43.6	7.501	0.886456	1.38131					0.406	0.591	0.00825461	0.108833
			0.619	5.399	0.0110412	0.821979					0.353	3.269	0.00629652	0.497694					29.307	3.044	0.511756	0.600778					1.437	57.296	0.0250927	11.3082					47.393	7.604	0.963573	1.40028					1.309	35.618	0.026614	6.55905
			59.909	3.681	1.06861	0.56042					0.872	41.464	0.015554	6.31275					58.074	5.498	1.01408	1.08511					0.938	39.756	0.0163793	7.84643					63.132	9.002	1.28357	1.65772					0.959	34.754	0.019498	6.39995
			49.823	4.084	0.888701	0.621775					0.524	6.273	0.00934667	0.955043					50.507	5.484	0.881948	1.08235					2.288	44.22	0.0399528	8.72747					47.246	7.369	0.960584	1.357					54.625	4.859	1.11061	0.894785
			36.625	3.124	0.653286	0.475618					0.44	4.233	0.00784835	0.64446					33.158	3.605	0.579002	0.7115					1.3	37.088	0.0227005	7.31986					65.306	7.816	1.32777	1.43932					3.365	36.71	0.0684157	6.76014
			49.99	4.631	0.891679	0.705054					0.585	5.285	0.0104347	0.804623					57.078	5.139	0.99669	1.01426					1.425	60.469	0.0248832	11.9344					42.573	8.785	0.865575	1.61776					1.43	60.464	0.0290741	11.1344
			43.539	4.167	0.776612	0.634411					2.539	70.538	0.0452885	10.7392					45.837	5.19	0.800401	1.02432					1.643	41.41	0.0286899	8.17287					58.679	7.699	1.19304	1.41777					2.611	22.859	0.0530857	4.20948
			57.106	4.33	1.01861	0.659228					6.158	4.051	0.109841	0.616751					32.954	5.923	0.575439	1.16899					0.817	42.006	0.0142664	8.2905					48.523	7.178	0.986548	1.32183					45.308	11.083	0.921182	2.04093
			39.954	4.079	0.712666	0.621014					11.362	3.368	0.202666	0.512766					57.696	4.357	1.00748	0.859918					0.908	44.482	0.0158554	8.77918					54.867	8.951	1.11553	1.64833					68.666	6.138	1.39609	1.13031
			50.412	3.703	0.899207	0.563769					0.444	2.427	0.0079197	0.369502					48.699	6.007	0.850377	1.18557					2.361	55.576	0.0412275	10.9687					63.696	9.551	1.29504	1.75882					0.6	0.613	0.0121989	0.112884
			51.071	5.32	0.910961	0.809952					2.139	25.882	0.0381537	3.94045					30.863	3.582	0.538927	0.70696					2.762	63.255	0.0482298	12.4843					27.003	7.416	0.549013	1.36566					0.34	0.55	0.00691273	0.101282
			43.983	4.842	0.784532	0.737178					0.383	4.858	0.00683163	0.739614					1.341	0.958	0.0234164	0.189075					0.822	34.627	0.0143537	6.83415					56.459	7.926	1.1479	1.45957					57.289	6.899	1.16477	1.27045
			52.653	5.098	0.93918	0.776153					1.315	68.182	0.0234559	10.3805					34.752	5.91	0.606836	1.16643					0.982	51.582	0.0171476	10.1805					53.369	8.446	1.08507	1.55533					4.001	30.16	0.0813465	5.55396
			39.195	3.419	0.699127	0.520531					1.724	55.648	0.0307513	8.47222					58.232	3.703	1.01684	0.730841					2.966	65.688	0.051792	12.9645					33.908	7.338	0.689402	1.35129					3.948	28.736	0.080269	5.29173
			51.342	3.778	0.915795	0.575188					1.357	61.336	0.024205	9.3382					58.979	3.502	1.02989	0.691171					2.879	63.106	0.0502728	12.4549					56.101	9.192	1.14062	1.69271					18.481	23.348	0.375747	4.29953
			50.295	6.299	0.89712	0.959001					0.341	5.383	0.00608247	0.819543					21.597	5.82	0.377125	1.14866					56.447	3.644	0.985672	0.719197					36.687	6.58	0.745904	1.21171					0.772	0.419	0.015696	0.0771588
			50.809	4.156	0.906288	0.632737					1.703	32.225	0.0303767	4.90615					49.436	4.07	0.863246	0.803274					1.353	23.149	0.0236259	4.5688					44.259	9.541	0.899854	1.75697					11.257	27.533	0.228872	5.0702
			40.09	3.24	0.715092	0.493279					5.007	2.432	0.0893106	0.370264					62.159	4.332	1.08541	0.854984					1.435	20.398	0.0250578	4.02584					58.118	8.444	1.18163	1.55496					1.469	28.522	0.029867	5.25232
			41.6	3.432	0.742026	0.52251					9.239	37.115	0.164797	5.65063					41.939	5.824	0.732335	1.14945					0.874	31.85	0.0152617	6.28607					51.732	8.068	1.05179	1.48572					1.064	18.346	0.0216328	3.37841
			44.604	3.184	0.795609	0.484753					4.738	37.411	0.0845124	5.6957					47.894	3.377	0.83632	0.666501					3.372	78.344	0.0588815	15.4623					51.65	8.656	1.05012	1.594					61.992	0.502	1.26039	0.0924433
			37.794	3.489	0.674138	0.531188					9.81	40.448	0.174983	6.15807					26.915	5.791	0.469987	1.14294					1.423	20.12	0.0248483	3.97098					54.306	7.744	1.10413	1.42606					14.165	24.035	0.287996	4.42604
			48.343	4.588	0.862302	0.698507					3.31	45.685	0.059041	6.95538					55.607	3.634	0.971004	0.717223					0.96	24.213	0.0167634	4.77879					47.769	8.124	0.971218	1.49603					0.982	0.975	0.0199656	0.179546
			40.864	3.564	0.728898	0.542607					5.005	35.788	0.089275	5.4486					46.717	3.063	0.815767	0.604528					0.984	45.469	0.0171825	8.97398					58.882	7.708	1.19716	1.41943					4.424	0.316	0.0899468	0.0581914
			52.836	4.249	0.942444	0.646896					18.258	4.648	0.325671	0.707642					61.367	4.929	1.07158	0.972811					1.721	34.728	0.0300519	6.85408					57.995	9.133	1.17913	1.68184					0.229	0.721	0.00465593	0.132772
			41.578	3.919	0.741633	0.596654					3.082	35.065	0.0549741	5.33853					51.945	4.874	0.907058	0.961956					1.409	40.291	0.0246038	7.95202					47.728	7.096	0.970384	1.30673					55.161	0.444	1.12151	0.0817626
			37.428	3.462	0.667609	0.527078					15.568	27.859	0.277689	4.24144					55.993	3.368	0.977744	0.664724					1.803	44.626	0.0314838	8.8076					5.609	1.266	0.11404	0.233134					53.803	0.715	1.0939	0.131667
			35.587	3.038	0.634771	0.462525					10.832	27.673	0.193212	4.21312					65.517	4.069	1.14405	0.803077					1.952	61.63	0.0340856	12.1636					52.223	7.209	1.06177	1.32754					0.383	0.438	0.00778698	0.0806577
			46.567	3.374	0.830623	0.51368					21.205	5.482	0.378237	0.834616					53.673	3.818	0.937232	0.753538					3.754	43.512	0.065552	8.58773					50.421	9.743	1.02514	1.79417					1.414	53.749	0.0287488	9.89788
			24.983	2.889	0.445626	0.43984					4.447	38.992	0.0793218	5.9364					53.529	4.133	0.934718	0.815708					3.66	42.355	0.0639105	8.35938					54.476	7.882	1.10758	1.45147					48.997	0.897	0.996185	0.165182
			39.045	3.548	0.696452	0.540171					1.058	43.856	0.0188717	6.67693					46.942	4.218	0.819696	0.832484					4.139	42.335	0.0722748	8.35543					42.755	7.73	0.869275	1.42348					15.326	0.316	0.311601	0.0581914
			41.006	3.908	0.73143	0.59498					4.892	34.985	0.0872594	5.32635					52.837	3.838	0.922634	0.757486					69.196	4.59	1.20829	0.905904					54.348	8.329	1.10498	1.53378					65.162	0.706	1.32484	0.13001
			46.404	3.773	0.827715	0.574426					0.906	37.409	0.0161605	5.69539					35.723	3.673	0.623791	0.724921					67.069	4.5	1.17115	0.888141					46.01	9.015	0.935455	1.66011					7.39	23.246	0.15025	4.28075
			48.974	3.986	0.873557	0.606855					0.696	26.934	0.0124147	4.10061					93.025	4.175	1.62439	0.823998					0.712	29.458	0.0124329	5.81397					15.689	9.013	0.318982	1.65974					63.619	0.759	1.29347	0.13977
			46.215	4.17	0.824344	0.634868					8.74	37.917	0.155897	5.77273					48.953	3.847	0.854812	0.759262					1.498	55.017	0.0261579	10.8584					47.983	7.231	0.975569	1.33159					1.938	0.314	0.0394025	0.0578231
			63.277	6.126	1.12868	0.932663					4.018	45.066	0.0716697	6.86114					79.728	4.692	1.3922	0.926035					1.64	25.87	0.0286375	5.10582					42.513	7.555	0.864355	1.39125					2.787	10.736	0.056664	1.97703
			44.07	3.69	0.786084	0.56179					10.562	27.146	0.188396	4.13289					55.15	3.622	0.963024	0.714855					0.871	29.091	0.0152093	5.74154					57.367	8.791	1.16636	1.61886					2.696	10.798	0.0548139	1.98845
			40.689	3.354	0.725776	0.510635					4.864	35.404	0.0867599	5.39014					52.382	4.902	0.914689	0.967482					0.792	49.963	0.0138298	9.86093					54.209	8.963	1.10215	1.65054					1.583	45.991	0.0321848	8.46924
			43.868	4.138	0.78248	0.629996					11.197	28.111	0.199723	4.2798					41.39	3.008	0.722748	0.593673					1.775	26.461	0.0309949	5.22247					51.587	9.316	1.04884	1.71554					0.726	0.237	0.0147607	0.0436435
			45.528	4.235	0.81209	0.644764					7.899	44.074	0.140896	6.71012					55.125	3.701	0.962587	0.730447					1.262	44.017	0.0220369	8.6874					60.11	10.035	1.22213	1.84794					1.537	0.3	0.0312496	0.055245
			50.903	4.272	0.907965	0.650397					21.081	32.095	0.376025	4.88635					63.739	5.043	1.113	0.99531					0.799	45.267	0.0139521	8.93411					55.588	10.147	1.13019	1.86857					38.67	0.723	0.786221	0.13314
			48.47	3.504	0.864567	0.533472					3.548	71.38	0.0632862	10.8674					45.597	3.376	0.79621	0.666303					0.693	20.215	0.0121011	3.98973					0.653	12.548	0.0132765	2.31071					5.105	0.346	0.103793	0.0637159
			52.17	5.053	0.930564	0.769302					5.008	41.029	0.0893285	6.24652					68.669	4.66	1.19909	0.919719					1.439	56.901	0.0251277	11.2302					0.734	13.97	0.0149234	2.57257					41.398	0.99	0.841686	0.182308
			40.072	3.977	0.714771	0.605485					5.62	53.803	0.100245	8.19132					47.403	3.804	0.827746	0.750775					1.297	29.856	0.0226481	5.89252					0.636	12.358	0.0129309	2.27572					1.999	25.223	0.0406428	4.64481
			47.413	4.813	0.845713	0.732763					7.759	45.3	0.138399	6.89677					41.151	3.309	0.718575	0.65308					0.91	42.125	0.0158903	8.31399					26.025	6.101	0.529129	1.1235					56.697	0.651	1.15274	0.119882
			50.218	3.554	0.895746	0.541084					4.108	16.926	0.073275	2.57693					55.197	4.077	0.963844	0.804656					0.586	34.754	0.0102327	6.85921					35.293	6.323	0.717561	1.16438					0.688	0.311	0.0139881	0.0572706
			43.609	4.054	0.777861	0.617208					18.296	43.901	0.326349	6.68378					43.075	3.216	0.752171	0.634725					0.788	67.26	0.01376	13.2747					38.727	7.326	0.78738	1.34908					0.734	0.239	0.0149234	0.0440118
			42.504	4.308	0.758151	0.655878					1.304	58.396	0.0232597	8.89059					61.176	4.701	1.06825	0.927811					1.106	51.186	0.0193129	10.1023					37.702	6.696	0.76654	1.23307					33.795	0.62	0.687105	0.114173
			43.313	5.119	0.772581	0.77935					7.474	36.813	0.133315	5.60465					50.3	4.108	0.878333	0.810774					0.658	25.857	0.0114899	5.10326					41.874	5.702	0.851363	1.05002					2.171	0.356	0.0441398	0.0655574
			48.448	4.638	0.864175	0.70612					5.353	48.628	0.0954823	7.40345					56.314	4.18	0.983349	0.824984					1.198	48.387	0.0209194	9.54989					37.642	5.751	0.76532	1.05905					0.284	1.412	0.00577416	0.26002
			49.79	4.714	0.888112	0.71769					3.163	41.805	0.0564189	6.36467					58.856	3.935	1.02774	0.77663					1.19	26.01	0.0207797	5.13346					31.286	7.158	0.636093	1.31815					1.205	1.213	0.0244995	0.223374
			54.234	4.32	0.96738	0.657705					12.623	36.48	0.225158	5.55396					59.447	5.15	1.03806	1.01643					0.763	63.816	0.0133234	12.595					38.063	6.973	0.77388	1.28408					2.015	31.395	0.0409681	5.78139
			48.385	4.348	0.863051	0.661968					10.562	27.337	0.188396	4.16196					8.789	4.128	0.153473	0.814721					0.264	2.164	0.00460994	0.427097					56.31	5.298	1.14487	0.975626					0.884	22.083	0.0179731	4.06658
			63.074	6.071	1.12506	0.924289					3.539	73.91	0.0631257	11.2525					36.005	3.843	0.628716	0.758473					0.567	9.77	0.0099009	1.92825					33.103	5.575	0.673035	1.02664					1.389	0.251	0.0282405	0.0462216
			0.594	5.558	0.0105953	0.846186					10.113	36.467	0.180387	5.55198					44.96	5.16	0.785087	1.0184					0.671	13.917	0.0117169	2.74672					30.977	6.563	0.62981	1.20858					3.557	14.157	0.0723193	2.60701
			59.834	5.105	1.06727	0.777219					2.235	62.23	0.039866	9.4743					64.036	5.265	1.11819	1.03913					1.204	60.014	0.0210241	11.8446					44.416	6.964	0.903046	1.28242					0.284	0.248	0.00577416	0.0456692
			51.37	5.863	0.916295	0.892622					4.433	39.036	0.0790721	5.9431					54.669	4.427	0.954625	0.873733					0.819	35.284	0.0143013	6.96382					31.543	5.787	0.641318	1.06568					4.331	0.285	0.0880559	0.0524827
			47.336	5.744	0.84434	0.874504					4.707	23.364	0.0839595	3.55709					47.823	5.237	0.83508	1.0336					0.287	2.189	0.00501156	0.432031					52.293	7.715	1.0632	1.42072					20.893	0.415	0.424787	0.0764222
			58.802	4.6	1.04886	0.700334					3.802	42.253	0.0678169	6.43287					40.745	4.937	0.711485	0.974389					32.094	1.394	0.560422	0.275126					40.227	5.049	0.817877	0.929773					3.577	17.186	0.072726	3.1648
			61.706	5.714	1.10066	0.869937					7.093	33.427	0.126519	5.08915					41.72	4.382	0.72851	0.864852					0.584	54.967	0.0101977	10.8485					44.357	6.08	0.901847	1.11963					4.679	32.352	0.0951313	5.95762
			56.101	5.522	1.00068	0.840706					4.981	34.23	0.0888469	5.2114					36.659	4.603	0.640136	0.90847					1.357	42.038	0.0236958	8.29682					56.256	5.652	1.14377	1.04082					2.625	37.675	0.0533703	6.93785
			58.543	6.16	1.04424	0.937839					13.123	36.377	0.234077	5.53827					40.871	4.807	0.713685	0.948732					0.757	48.1	0.0132187	9.49324					50.58	6.995	1.02837	1.28813					0.161	0.167	0.00327338	0.030753
			56.294	5.472	1.00412	0.833093					4.056	26.057	0.0723475	3.96709					33.673	5.276	0.587994	1.0413					7.026	1.217	0.122687	0.240193					37.233	5.85	0.757005	1.07728					12.184	0.357	0.24772	0.0657415
			58.923	6.801	1.05102	1.03543					29.266	4.996	0.522022	0.760624					60.854	4.081	1.06263	0.805445					1.545	71.384	0.0269786	14.0887					44.398	6.642	0.90268	1.22312					1.939	36.051	0.0394229	6.63879
			53.642	6.036	0.956821	0.91896					11.023	33.862	0.196619	5.15537					72.592	5.085	1.26759	1.0036					0.637	21.891	0.0111232	4.32051					56.929	6.985	1.15745	1.28629					2.041	15.049	0.0414967	2.77127
			64.276	7.093	1.1465	1.07988					1.172	28.445	0.0209051	4.33065					60.255	4.316	1.05217	0.851826					23.09	1.195	0.403195	0.235851					36.266	6.01	0.737344	1.10674					0.294	0.387	0.00597748	0.071266
			0.413	1.158	0.00736675	0.176302					2.79	39.207	0.0497657	5.96913					45.065	4.493	0.78692	0.88676					1.487	63.802	0.0259658	12.5923					59.835	7.564	1.21654	1.39291					2.02	34.921	0.0410697	6.4307
			25.053	14.636	0.446874	2.22828					4.192	45.953	0.0747734	6.99619					60.819	3.554	1.06202	0.701434					1.293	40.782	0.0225782	8.04893					34.019	5.715	0.691659	1.05242					0.497	0.328	0.0101048	0.0604012
			24.198	12.62	0.431624	1.92135					3.513	63.665	0.0626619	9.69278					45.567	4.322	0.795686	0.85301					0.815	47.27	0.0142314	9.32943					27.817	5.544	0.565563	1.02093					29.274	14.701	0.595186	2.70719
			33.882	12.746	0.604359	1.94053					1.169	61.2	0.0208516	9.31749					58.15	6.008	1.01541	1.18577					0.953	49.155	0.0166412	9.70146					27.036	5.539	0.549684	1.02001					9.516	19.123	0.193475	3.5215
			38.665	9.913	0.689674	1.50922					1.227	53.285	0.0218862	8.11246					49.139	4.6	0.85806	0.907878					0.52	22.52	0.00908019	4.44465					43.331	6.506	0.880986	1.19808					2.494	7.101	0.0507069	1.30765
			27.244	10.569	0.485956	1.60909					9.699	43.998	0.173003	6.69854					47.426	5.917	0.828148	1.16781					1.45	35.063	0.0253198	6.9202					32.521	4.781	0.661202	0.880421					2.315	34.439	0.0470675	6.34194
			52.062	11.635	0.928638	1.77139					34.717	4.203	0.619253	0.639892					35.131	4.395	0.613454	0.867418					1.525	14.995	0.0266294	2.95948					45.427	6.948	0.923601	1.27947					30.417	15.672	0.618425	2.886
			37.626	10.333	0.671141	1.57316					1.135	58.501	0.0202452	8.90658					4.171	1.737	0.0728336	0.342822					24.55	1.248	0.42869	0.246311					53.529	5.799	1.08833	1.06789					2.578	26.881	0.0524147	4.95013
			36.52	9.935	0.651413	1.51257					18.214	47.642	0.324886	7.25333					51.488	4.988	0.899078	0.984455					0.777	24.909	0.0135679	4.91616					37.438	6.704	0.761173	1.23454					2.133	28.127	0.0433672	5.17959
			38.144	12.061	0.680381	1.83625					1.037	45.647	0.0184971	6.9496					51.47	5.427	0.898764	1.0711					34.306	1.504	0.599048	0.296836					56.326	8.823	1.14519	1.62475					3.692	17.372	0.0750641	3.19905
			33.77	8.206	0.602361	1.24934					5.951	46.741	0.106149	7.11616					40.746	3.76	0.711503	0.742091					32.244	1.471	0.563041	0.290323					39.401	5.705	0.801083	1.05058					2.685	31.512	0.0545902	5.80293
			34.714	8.195	0.619199	1.24766					43.823	5.704	0.781678	0.868414					38.436	3.911	0.671166	0.771893					2.589	44.075	0.0452089	8.69885					32.949	6.751	0.669904	1.2432					6.122	0.284	0.12447	0.0522986
			40.559	10.176	0.723457	1.54926					32.532	5.002	0.580278	0.761537					48.281	7.082	0.843078	1.39774					19.921	1.138	0.347858	0.224601					44.5	6.137	0.904754	1.13013					7.99	1.586	0.162449	0.292062
			33.927	12.043	0.605161	1.83351					1.022	42.154	0.0182296	6.4178					58.156	4.621	1.01551	0.912022					24.382	0.996	0.425756	0.196575					53.956	5.704	1.09701	1.05039					5.257	29.629	0.106883	5.45618
			31.29	9.689	0.558125	1.47512					3.648	23.281	0.0650699	3.54445					1.177	1.065	0.0205527	0.210193					0.859	52.937	0.0149998	10.4479					36.657	6.309	0.745294	1.1618					2.716	22.582	0.0552205	4.15847
			42.424	7.233	0.756724	1.1012					6.428	31.309	0.114657	4.76669					35.639	4.17	0.622325	0.823011					31.971	1.173	0.558274	0.231509					32.351	6.427	0.657746	1.18353					18.318	8.144	0.372433	1.49972
			47.245	7.215	0.842716	1.09846					0.507	2.246	0.00904344	0.341946					39.343	5.575	0.687003	1.10031					24.363	1.055	0.425424	0.20822					47.171	6.898	0.95906	1.27027					6.462	3.494	0.131382	0.64342
			33.579	11.6	0.598954	1.76606					1.648	50.138	0.0293956	7.63334					63.043	3.963	1.10085	0.782156					1.988	49.381	0.0347143	9.74607					48.809	5.798	0.992363	1.0677					0.611	23.683	0.0124226	4.36122
			45.414	7.183	0.810057	1.09359					1.491	52.518	0.0265952	7.99569					51.508	4.498	0.899427	0.887746					16.27	1.024	0.284105	0.202101					2.522	0.858	0.0512762	0.158001					71.821	1.96	1.46023	0.360934
			45.556	10.198	0.81259	1.55261					6.854	32.851	0.122256	5.00145					59.019	4.162	1.03058	0.821432					1.223	38.853	0.0213559	7.66821					24.333	5.076	0.494728	0.934745					0.878	28.413	0.0178511	5.23225
			34.484	9.519	0.615097	1.44924					4.411	18.769	0.0786797	2.85752					56.543	3.632	0.987348	0.716829					0.575	18.274	0.0100406	3.60664					45.394	6.089	0.92293	1.12129					2.249	45.79	0.0457257	8.43223
			30.938	11.374	0.551846	1.73165					7.893	39.419	0.140789	6.00141					54.47	3.609	0.95115	0.712289					17.275	1.104	0.301654	0.217891					54.799	7.081	1.11415	1.30397					2.451	43.42	0.0498326	7.99579
			40.629	6.759	0.724706	1.02903					44.299	7.431	0.790168	1.13134					46.686	3.964	0.815226	0.782354					0.893	40.126	0.0155935	7.91946					50.098	6.21	1.01857	1.14357					0.919	21.931	0.0186847	4.03859
			37.676	10.227	0.672033	1.55703					6.016	26.516	0.107308	4.03697					58.304	5.196	1.0181	1.02551					0.912	45.067	0.0159253	8.89463					22.207	5.762	0.451503	1.06107					0.89	20.794	0.0180951	3.82921
			40.309	9.134	0.718998	1.39062					1.401	41.597	0.0249899	6.333					58.708	3.82	1.02515	0.753933					1.307	56.1	0.0228227	11.0722					30.854	7.432	0.62731	1.3686					2.93	60.369	0.0595714	11.1169
			35.267	12.505	0.629063	1.90384					33.188	5.853	0.59198	0.891099					62.82	4.279	1.09696	0.844524					0.352	1.019	0.00614659	0.201115					57.745	9.546	1.17405	1.7579					9.632	70.319	0.195833	12.9492
			38.538	8.187	0.687408	1.24644					2.392	14.415	0.0426665	2.19463					54.125	4.996	0.945125	0.986034					0.839	37.36	0.0146505	7.37354					40.268	6.401	0.818711	1.17874					2.355	37.847	0.0478808	6.96952
			46.606	8.636	0.831319	1.3148					4.756	41.467	0.0848335	6.31321					62.51	4.094	1.09154	0.808011					0.818	45.599	0.0142838	8.99963					37.473	6.182	0.761884	1.13841					2.022	26.706	0.0411104	4.91791
			39.541	11.416	0.705299	1.73805					19.737	6.4	0.352052	0.974378					57.781	4.791	1.00897	0.945574					1.058	53.274	0.0184747	10.5144					53.768	8.647	1.09319	1.59234					2.406	32.725	0.0489177	6.02631
			51.796	7.156	0.923893	1.08948					2.773	49.156	0.0494624	7.48383					57.52	4.625	1.00441	0.912812					0.499	24.169	0.00871349	4.77011					51.367	7.154	1.04437	1.31741					2.616	42.301	0.0531873	7.78973
			39.211	6.316	0.699413	0.961589					4.6	37.629	0.0820509	5.72889					63.429	4.647	1.10759	0.917154					0.941	48.216	0.0164316	9.51614					31.985	7.094	0.650305	1.30636					2.316	32.111	0.0470879	5.91324
			43.776	11.4	0.780839	1.73561					2.644	17.474	0.0471614	2.66036					32.178	4.266	0.561889	0.841958					0.785	37.071	0.0137076	7.31651					39.729	7.604	0.807752	1.40028					2.38	26.766	0.0483891	4.92896
			40.008	8.105	0.713629	1.23396					4.821	48.675	0.0859929	7.4106					48.166	4.2	0.84107	0.828932					12.258	1.027	0.214048	0.202694					17.235	7.203	0.350414	1.32643					2.898	55.965	0.0589208	10.306
			37.316	8.592	0.665611	1.3081					2.447	20.744	0.0436475	3.1582					51.641	5.266	0.90175	1.03932					0.828	31.53	0.0144585	6.22291					41.66	5.957	0.847012	1.09698					0.478	1.947	0.00971848	0.35854
			37.776	5.909	0.673816	0.899625					1.293	53.095	0.0230634	8.08353					43.048	4.625	0.7517	0.912812					0.814	33.205	0.014214	6.55349					2.383	1.696	0.0484501	0.312318					0.836	22.444	0.0169972	4.13306
			42.256	10.304	0.753727	1.56875					5.01	29.036	0.0893642	4.42063					49.925	3.952	0.871785	0.779985					0.832	36.904	0.0145283	7.28355					46.898	6.836	0.953509	1.25885					0.864	41.243	0.0175665	7.5949
			45.379	11.115	0.809432	1.69222					2.696	17.557	0.048089	2.67299					56.197	3.813	0.981306	0.752552					12.511	1.37	0.218466	0.27039					44.037	6.308	0.89534	1.16162					2.979	29.792	0.0605677	5.48619
			55.691	7.351	0.993369	1.11916					2.683	21.502	0.0478571	3.27361					48.646	3.872	0.849451	0.764196					0.606	17.831	0.0105819	3.51921					51.037	4.402	1.03766	0.810628					0.774	25.985	0.0157366	4.78514
			44.517	7.511	0.794057	1.14352					0.96	28.004	0.0171237	4.26351					59.938	4.506	1.04663	0.889325					44.408	1.493	0.775448	0.294665					46.668	6.834	0.948833	1.25848					2.829	3.379	0.057518	0.622243
			50.78	10.027	0.905771	1.52658					2.313	15.478	0.0412573	2.35647					58.461	4.225	1.02084	0.833866					0.814	23.681	0.014214	4.67379					47.04	4.355	0.956396	0.801973					3.211	29.174	0.0652846	5.37239
			9.93	4.051	0.177123	0.616751					1.456	33.784	0.0259709	5.1435					47.885	4.147	0.836163	0.818471					1.299	45.737	0.022683	9.02687					49.284	8.158	1.00202	1.5023					3.267	23.617	0.0664232	4.34907
			41.81	11.867	0.745772	1.80671					1.104	29.728	0.0196922	4.52599					61.599	4.997	1.07564	0.986231					1.444	44.027	0.025215	8.68938					37.677	5.959	0.766032	1.09735					0.937	26.738	0.0190507	4.9238
			45.207	11.214	0.806364	1.70729					1.378	37.416	0.0245796	5.69646					48.9	4.941	0.853887	0.975179					0.654	16.453	0.0114201	3.24724					38.39	6.014	0.780528	1.10748					0.741	20.826	0.0150657	3.83511
			35.482	8.289	0.632898	1.26197					0.94	26.088	0.0167669	3.97181					47.264	4.913	0.825319	0.969653					1.363	26.875	0.0238006	5.30418					49.862	8.191	1.01377	1.50837					0.585	16.305	0.011894	3.00256
			37.417	7.757	0.667413	1.18098					1.748	26.738	0.0311794	4.07077					58.331	4.593	1.01857	0.906496					0.695	20.815	0.012136	4.10815					36.07	5.38	0.733359	0.990727					1.046	23.884	0.0212668	4.39824
			35.068	6.382	0.625513	0.971638					1.747	19.675	0.0311615	2.99545					52.153	4.27	0.91069	0.842747					1.026	22.431	0.0179159	4.42709					51.1	8.385	1.03894	1.5441					0.818	19.003	0.0166312	3.4994
			32.93	11.308	0.587378	1.7216					1.692	41.356	0.0301805	6.29631					53.145	4.092	0.928013	0.807616					0.915	24.887	0.0159776	4.91182					22.407	5.739	0.455569	1.05684					1.165	33.485	0.0236863	6.16626
			46.892	7.044	0.83642	1.07242					1.791	23.38	0.0319463	3.55952					67.319	4.364	1.17552	0.8613					0.614	17.101	0.0107216	3.37513					59.295	7.985	1.20556	1.47044					0.537	12.668	0.010918	2.33281
			25.666	6.215	0.457808	0.946212					2.154	23.681	0.0384212	3.60535					80.017	4.197	1.39725	0.82834					1.269	48.081	0.0221591	9.48949					55.241	6.1	1.12314	1.12331					1.047	32.454	0.0212871	5.9764
			44.657	7.551	0.796554	1.14961					1.703	14.516	0.0303767	2.21001					63.14	5.173	1.10254	1.02097					1.821	57.781	0.0317981	11.4039					56.43	8.661	1.14731	1.59492					0.782	22.766	0.0158993	4.19236
			42.988	6.679	0.766784	1.01685					1.459	48.221	0.0260244	7.34148					45.187	4.453	0.789051	0.878865					22.271	0.901	0.388894	0.177826					31.854	7.944	0.647641	1.46289					1.895	57.595	0.0385283	10.6061
			37.734	7.229	0.673067	1.10059					1.719	15.104	0.0306621	2.29953					54.608	4.483	0.953559	0.884786					0.33	0.935	0.00576243	0.184536					38.943	6.036	0.791772	1.11153					1.061	33.693	0.0215718	6.20456
			40.636	9.288	0.724831	1.41407					1.49	27.732	0.0265774	4.2221					46.82	4.679	0.817566	0.923469					1.625	41.471	0.0283756	8.18491					33.406	6.919	0.679196	1.27413					0.853	12.32	0.0173428	2.26873
			39.586	8.502	0.706102	1.2944					1.613	29.111	0.0287713	4.43205					61.864	4.494	1.08026	0.886957					6.813	25.886	0.118968	5.10898					41.032	6.913	0.834244	1.27303					0.893	23.832	0.0181561	4.38866
			42.988	7.032	0.766784	1.0706					1.738	30.328	0.031001	4.61733					5.78	4.834	0.10093	0.954061					17.775	1.095	0.310385	0.216114					45.917	7.769	0.933564	1.43066					0.991	16.361	0.0201486	3.01288
			20.892	6.425	0.372654	0.978184					2.647	41.163	0.047215	6.26693					58.849	4.718	1.02762	0.931167					0.614	27.234	0.0107216	5.37503					44.993	7.731	0.914777	1.42366					1.421	25.956	0.0288911	4.7798
			27.932	6.118	0.498227	0.931445					3.165	31.598	0.0564546	4.81069					53.566	5.028	0.935364	0.99235					28.432	0.987	0.496477	0.194799					29.144	6.594	0.592543	1.21428					1.393	21.944	0.0283219	4.04099
			46.637	10.806	0.831871	1.64518					3.117	27.394	0.0555984	4.17064					8.277	5.116	0.144532	1.00972					1.137	58.236	0.0198542	11.4937					60.074	8.126	1.2214	1.4964					1.29	25.88	0.0262277	4.7658
			42.247	6.034	0.753566	0.918656					0.403	3.439	0.00718837	0.523576					64.319	4.263	1.12313	0.841366					31.558	1.032	0.551063	0.20368					22.792	5.211	0.463397	0.959605					0.913	16.626	0.0185627	3.06168
			29.48	11.764	0.525839	1.79103					2.723	41.32	0.0485706	6.29083					55.676	4.547	0.972209	0.897417					1.255	57.287	0.0219147	11.3064					38.862	6.299	0.790125	1.15996					0.877	23.571	0.0178308	4.3406
			23.436	6.131	0.418032	0.933424					2.364	47.088	0.042167	7.16899					69.603	5.017	1.2154	0.990179					0.675	1.958	0.0117868	0.38644					36.71	7.536	0.746371	1.38775					0.84	30.785	0.0170785	5.66906
			36.808	9.171	0.65655	1.39625					0.317	3.057	0.00565438	0.465418					57.461	5.171	1.00338	1.02057					0.97	48.792	0.016938	9.62982					56.271	8.29	1.14408	1.5266					1.094	23.51	0.0222427	4.32937
			21.673	7.875	0.386585	1.19894					1.869	25.96	0.0333376	3.95232					39.209	4.473	0.684664	0.882812					1.659	49.754	0.0289693	9.81968					35.423	5.63	0.720205	1.03676					1.574	24.43	0.0320019	4.49878
			27.908	5.809	0.497799	0.8844					0.55	6.285	0.00981044	0.95687					70.783	5.256	1.23601	1.03735					0.671	37.337	0.0117169	7.36901					49.171	5.53	0.999723	1.01835					1.204	23.172	0.0244792	4.26712
			47.795	8.581	0.852527	1.30643					0.79	38.722	0.0140914	5.89529					7.591	4.749	0.132553	0.937285					16.88	1.357	0.294757	0.267824					34.901	5.425	0.709591	0.999013					4.737	18.346	0.0963106	3.37841
			29.768	11.224	0.530976	1.70882					0.411	4.139	0.00733107	0.630149					57.915	4.773	1.01131	0.942022					1.291	51.548	0.0225433	10.1738					38.028	9.042	0.773168	1.66508					1.797	20.296	0.0365358	3.73751
			27.262	6.272	0.486277	0.954891					0.538	4.922	0.00959639	0.749358					53.439	6.073	0.933146	1.1986					51.926	1.701	0.906727	0.335717					60.051	8.241	1.22093	1.51758					0.903	16.545	0.0183594	3.04676
			38.4	8.813	0.684947	1.34175					4.853	18.366	0.0865637	2.79616					57.211	4.697	0.999013	0.927022					35.254	1.449	0.615602	0.285981					38.805	7.695	0.788966	1.41703					0.738	18.175	0.0150047	3.34693
			44.317	6.529	0.790489	0.994018					4.766	17.808	0.0850119	2.71121					66.138	5.623	1.1549	1.10978					1.545	51.782	0.0269786	10.2199					36.539	7.503	0.742895	1.38168					1.265	16.739	0.0257194	3.08249
			35.013	8.72	0.624532	1.32759					6.773	21.307	0.120811	3.24392					70.825	5.038	1.23674	0.994323					1.606	52.265	0.0280438	10.3153					0.424	4.015	0.00862058	0.739362					1.257	15.999	0.0255568	2.94621
			34.947	7.909	0.623355	1.20412					6.464	24.74	0.115299	3.76658					61.611	5.469	1.07585	1.07939					1.646	35.554	0.0287423	7.0171					39.11	7.049	0.795167	1.29807					1.637	22.942	0.0332827	4.22477
			42.973	7.353	0.766516	1.11947					3.254	38.015	0.0580421	5.78765					49.665	5.37	0.867245	1.05985					23.284	1.468	0.406583	0.289731					43.063	7.17	0.875538	1.32036					0.716	18.01	0.0145574	3.31654
			33.961	7.078	0.605768	1.0776					3.949	25.867	0.0704389	3.93816					64.127	6.161	1.11978	1.21596					29.829	1.237	0.520871	0.24414					20.771	5.579	0.422307	1.02737					1.202	16.085	0.0244385	2.96205
			43.633	10.14	0.778289	1.54378					12.044	19.503	0.214831	2.96926					58.764	4.583	1.02613	0.904522					0.765	48.472	0.0133584	9.56666					37.284	6.707	0.758042	1.23509					0.784	13.709	0.0159399	2.52451
			30.226	12.739	0.539146	1.93947					9.03	21.968	0.16107	3.34455					8.023	8.205	0.140097	1.61938					42.691	2.164	0.745466	0.427097					50.41	7.322	1.02491	1.34835					1.302	16.215	0.0264717	2.98599
			42.376	8.172	0.755867	1.24416					3.577	35.575	0.0638035	5.41617					74.499	4.696	1.30089	0.926825					1.349	42.057	0.0235561	8.30057					35.835	6.451	0.728581	1.18795					0.713	29.904	0.0144964	5.50682
			38.301	7.559	0.683181	1.15083					2.045	23.843	0.036477	3.63002					84.347	5.961	1.47286	1.17649					31.618	1.617	0.55211	0.319139					38.615	8.27	0.785103	1.52292					0.823	29.046	0.0167329	5.34882
			41.9	9.558	0.747377	1.45517					5.431	44.806	0.0968736	6.82156					74.472	7.183	1.30042	1.41767					0.651	32.032	0.0113677	6.32199					39.547	7.165	0.804052	1.31943					1.128	36.008	0.022934	6.63087
			39.129	7.345	0.69795	1.11825					4.923	41.501	0.0878123	6.31839					77.752	5.845	1.3577	1.1536					1.13	29.139	0.0197319	5.75101					44.508	6.21	0.904917	1.14357					0.715	18.796	0.0145371	3.46128
			43.445	9.316	0.774935	1.41833					12.355	19.567	0.220378	2.97901					64.96	5.126	1.13432	1.01169					2.913	60.468	0.0508665	11.9342					44.128	6.802	0.897191	1.25259					0.386	2.2	0.00784798	0.40513
			29.255	11.91	0.521826	1.81326					3.611	23.065	0.06441	3.51157					78.696	6.076	1.37418	1.19919					40.92	1.955	0.714541	0.385848					44.015	7.482	0.894893	1.37781					0.883	16.582	0.0179528	3.05357
			32.79	7.96	0.58488	1.21188					13.612	17.337	0.242799	2.6395					70.466	5.694	1.23047	1.12379					1.461	63.948	0.0255118	12.6211					24.723	5.297	0.502657	0.975442					0.717	20.163	0.0145777	3.71302
			15.467	8.407	0.275887	1.27994					8.456	24.293	0.150831	3.69853					85.277	6.088	1.4891	1.20156					0.928	42.866	0.0162046	8.46023					35.396	9.337	0.719656	1.71941					2.657	45.384	0.0540209	8.35746
			0.636	4.466	0.0113444	0.679933					7.238	18.129	0.129105	2.76008					75.776	5.967	1.32319	1.17768					0.724	45.715	0.0126424	9.02253					44.676	6.983	0.908332	1.28592					1.113	8.188	0.022629	1.50782
			29.419	8.991	0.524751	1.36885					2.483	19.749	0.0442897	3.00672					84.522	7.186	1.47591	1.41826					1.307	42.745	0.0228227	8.43635					44.279	7.027	0.900261	1.29402					1.322	10.122	0.0268783	1.86397
			42.361	10.815	0.7556	1.64655					3.697	32.77	0.065944	4.98912					70.599	5.923	1.23279	1.16899					2.819	57.686	0.0492251	11.3852					39.659	5.976	0.806329	1.10048					1.184	11.446	0.0240726	2.10778
			37.156	7.324	0.662757	1.11505					4.16	32.272	0.0742026	4.9133					84.412	6.473	1.47399	1.27754					1.564	69.525	0.0273104	13.7218					25.517	7.915	0.5188	1.45755					0.391	1.806	0.00794964	0.332575
			48.045	9.013	0.856986	1.3722					3.143	37.907	0.0560622	5.77121					87.436	5.479	1.5268	1.08136					1.003	24.078	0.0175143	4.75215					38.06	7.001	0.773819	1.28923					0.346	2.254	0.00703472	0.415074
			40.427	8.956	0.721103	1.36352					3.865	36.337	0.0689406	5.53218					65.181	5.393	1.13818	1.06439					0.661	36.861	0.0115423	7.27506					42.601	7.221	0.866144	1.32975					1.22	11.648	0.0248045	2.14498
			40.71	16.129	0.726151	2.45558					4.419	45.024	0.0788224	6.85475					84.821	5.645	1.48114	1.11412					1.043	50.796	0.0182128	10.0253					36.415	6.032	0.740373	1.11079					1.225	10.979	0.0249061	2.02178
			45.514	6.738	0.81184	1.02584					2.945	25.138	0.0525304	3.82717					63.97	5.555	1.11704	1.09636					2.512	59.541	0.0438643	11.7513					40.717	5.869	0.82784	1.08078					1.213	20.075	0.0246622	3.69681
			51.945	9.875	0.926551	1.50343					3.798	39.047	0.0677455	5.94477					80.181	6.463	1.40011	1.27557					2.703	66.244	0.0471995	13.0742					40.63	6.883	0.826071	1.2675					0.907	44.579	0.0184407	8.20922
			41.842	11.815	0.746342	1.79879					4.117	43.944	0.0734356	6.69032					84.893	5.891	1.48239	1.16268					0.858	46.323	0.0149823	9.14252					35.364	6.413	0.719005	1.18095					0.358	1.614	0.0072787	0.297218
			41.165	9.672	0.734267	1.47253					11.982	10.272	0.213725	1.56388					69.718	5.954	1.21741	1.17511					0.841	38.364	0.0146855	7.5717					32.868	6.647	0.668257	1.22404					0.692	17.79	0.0140694	3.27603
			45.47	7.886	0.811056	1.20062					5.225	14.697	0.0931991	2.23757					45.939	4.134	0.802182	0.815906					0.747	14.453	0.013044	2.85251					23.272	5.22	0.473156	0.961263					0.767	26.913	0.0155943	4.95603
			42.501	10.917	0.758097	1.66208					5.649	20.643	0.100762	3.14283					68.992	4.956	1.20473	0.978139					0.918	56.355	0.01603	11.1225					35.611	9.205	0.724027	1.6951					15.149	0.405	0.308003	0.0745807
			55.999	9.189	0.998863	1.39899					5.265	16.509	0.0939126	2.51344					80.93	6.005	1.41319	1.18517					0.88	39.87	0.0153665	7.86893					31.785	6.513	0.646238	1.19937					2.505	8.123	0.0509305	1.49585
			33.673	10.9	0.600631	1.65949					5.215	13.261	0.0930208	2.01894					62.903	4.874	1.09841	0.961956					0.815	14.999	0.0142314	2.96027					42.417	6.728	0.862403	1.23896					18.192	0.632	0.369872	0.116383
			31.316	12.479	0.558588	1.89988					9.835	33.685	0.175428	5.12843					60.453	4.663	1.05562	0.920312					3.119	71.89	0.0544637	14.1885					37.732	7.917	0.76715	1.45792					3.426	10.272	0.0696559	1.89159
			34.703	10.712	0.619003	1.63087					6.567	24.079	0.117137	3.66595					45.625	4.37	0.796699	0.862484					0.821	17.789	0.0143362	3.51092					47.869	6.841	0.973251	1.25977					1.272	17.702	0.0258617	3.25982
			53.859	8.598	0.960691	1.30902					30.059	1.112	0.536167	0.169298					69.24	6.107	1.20906	1.20531					0.795	17.359	0.0138822	3.42605					40.697	6.051	0.827433	1.11429					9.906	4.325	0.201404	0.796448
			46.188	6.654	0.823863	1.01305					4.9	19.333	0.0874021	2.94338					60.788	4.445	1.06147	0.877286					50.485	3.15	0.881564	0.621699					36.969	6.628	0.751637	1.22055					1.258	10.063	0.0255771	1.8531
			30.461	11.399	0.543338	1.73546					7.362	25.724	0.131317	3.91639					64.211	4.839	1.12125	0.955048					0.85	15.539	0.0148426	3.06685					42.625	5.517	0.866632	1.01596					2.638	39.232	0.0536346	7.22457
			29.388	11.023	0.524198	1.67821					28.727	0.956	0.512408	0.145548					87.311	6.748	1.52462	1.33182					67.101	3.847	1.17171	0.759262					50.006	8.805	1.0167	1.62144					1.151	21.871	0.0234016	4.02754
			48.101	8.144	0.857985	1.2399					10.157	16.561	0.181172	2.52136					75.228	6.304	1.31362	1.24419					0.849	35.288	0.0148252	6.96461					31.998	6.261	0.650569	1.15296					17.361	0.586	0.352976	0.107912
			0.89	6.679	0.0158751	1.01685					12.659	10.068	0.225801	1.53282					84.333	6.609	1.47261	1.30438					0.977	14.339	0.0170603	2.83001					36.176	7.363	0.735514	1.3559					2.296	36.308	0.0466812	6.68612
			0.722	8.863	0.0128784	1.34936					2.904	17.084	0.0517991	2.60098					60.177	5.225	1.0508	1.03123					56.903	4.296	0.993634	0.847879					30.993	5.31	0.630136	0.977836					7.633	17.213	0.155191	3.16977
			0.711	11.251	0.0126822	1.71293					26.25	1.42	0.468225	0.21619					92.955	7.278	1.62317	1.43642					3.34	84.593	0.0583227	16.6957					35.457	6.32	0.720896	1.16383					2.288	47.177	0.0465186	8.68764
			0.746	10.984	0.0133065	1.67228					1.392	45.484	0.0248293	6.92478					84.453	6.767	1.47471	1.33557					3.416	77.511	0.0596498	15.2979					42.578	7.834	0.865677	1.44263					1.128	22.253	0.022934	4.09789
			0.918	10.1	0.0163745	1.53769					23.841	9.99	0.425256	1.52094					94.657	6.306	1.65289	1.24458					1.838	34.738	0.032095	6.85605					33.782	8.031	0.68684	1.47891					6.989	16.553	0.142097	3.04823
			23.364	13.316	0.416747	2.02732					5.474	32.159	0.0976406	4.8961					66.026	6.825	1.15294	1.34701					1.016	26.578	0.0177413	5.24556					39.724	6.896	0.807651	1.2699					2.667	46.909	0.0542242	8.63829
			20.459	12.533	0.36493	1.90811					25.334	1.009	0.451887	0.153617					71.399	5.995	1.24676	1.1832					1.023	49.949	0.0178635	9.85817					42.16	5.919	0.857178	1.08998					2.627	46.958	0.053411	8.64731
			18.777	10.591	0.334928	1.61244					3.21	48.841	0.0572573	7.43587					66.68	5.381	1.16436	1.06202					1.549	34.124	0.0270485	6.73487					38.563	5.737	0.784046	1.05647					10.745	0.377	0.218463	0.0694245
			27.913	12.703	0.497889	1.93399					3.724	27.675	0.0664256	4.21342					65.868	6.961	1.15018	1.37386					1.424	42.468	0.0248657	8.38168					39.385	6.584	0.800758	1.21244					11.417	0.613	0.232125	0.112884
			30.408	9.378	0.542392	1.42777					4.346	12.943	0.0775203	1.97053					75.606	7.179	1.32022	1.41688					0.653	28.664	0.0114026	5.65726					36.401	8.621	0.740089	1.58756					2.9	51.505	0.0589615	9.48464
			42.127	9.412	0.751426	1.43294					3.907	46.221	0.0696898	7.03699					76.743	6.461	1.34008	1.27517					0.744	25.865	0.0129917	5.10484					18.797	4.385	0.382172	0.807497					1.102	32.268	0.0224054	5.94215
			22.684	7.545	0.404618	1.1487					8.234	8.521	0.146871	1.29729					71.699	5.663	1.252	1.11768					2.054	55.663	0.0358667	10.9859					38.907	8.47	0.79104	1.55975					4.462	0.834	0.0907194	0.153581
			44.592	10.122	0.795395	1.54104					2.355	49.507	0.0420065	7.53727					62.414	5.662	1.08987	1.11748					1.904	66.175	0.0332475	13.0606					25.061	5.566	0.509529	1.02498					11.454	0.626	0.232878	0.115278
			52.537	9.754	0.937111	1.48501					8.787	4.769	0.156735	0.726064					80.859	7.002	1.41195	1.38195					0.39	2.77	0.00681014	0.5467					40.319	6.279	0.819748	1.15628					6.505	0.889	0.132257	0.163709
			40.424	9.191	0.721049	1.3993					3.025	32.633	0.0539574	4.96826					66.836	6.472	1.16708	1.27734					4.36	37.885	0.0761339	7.47716					30.124	8.69	0.612468	1.60026					1.866	35.246	0.0379387	6.49055
			47.12	10.368	0.840487	1.57849					1.954	43.937	0.0348538	6.68926					63.86	6.292	1.11512	1.24182					82.167	4.726	1.43479	0.932746					40.17	6.537	0.816718	1.20379					2.347	27.691	0.0477181	5.0993
			53.224	10.292	0.949365	1.56692					3.986	43.77	0.0710989	6.66383					58.234	5.746	1.01688	1.13406					81.51	4.696	1.42332	0.926825					41.973	5.909	0.853376	1.08814					0.773	37.196	0.0157163	6.84964
			30.909	8.995	0.551329	1.36946					9.8	8.048	0.174804	1.22528					74.036	6.156	1.29281	1.21498					1.017	20.549	0.0177588	4.05565					37.67	6.841	0.76589	1.25977					9.739	47.311	0.198009	8.71232
			51.94	10.356	0.926462	1.57667					2.938	28.683	0.0524056	4.36689					90.958	6.847	1.5883	1.35136					1.468	35.973	0.0256341	7.0998					43.365	8.085	0.881678	1.48885					1.253	46.404	0.0254754	8.54529
			69.201	10.388	1.23435	1.58154					1.855	42.806	0.0330879	6.51707					78.322	6.711	1.36765	1.32451					1.287	44.954	0.0224735	8.87233					26.411	5.127	0.536977	0.944137					2.456	26.96	0.0499343	4.96468
			45.368	8.562	0.809236	1.30354					17.677	1.549	0.315307	0.23583					68.034	4.984	1.188	0.983666					1.112	25.601	0.0194176	5.05273					33.144	6.494	0.673869	1.19587					1.39	11.878	0.0282609	2.18733
			58.395	10.741	1.0416	1.63528					20.216	1.443	0.360596	0.219692					78.765	6.361	1.37539	1.25544					2.618	47.917	0.0457152	9.45712					42.502	8.35	0.864132	1.53765					9.185	44.308	0.186745	8.15932
			48.12	10.84	0.858324	1.65035					3.856	18.932	0.0687801	2.88233					68.254	5.579	1.19184	1.1011					2.163	51.437	0.0377701	10.1518					33.825	6.314	0.687715	1.16272					3.412	44.85	0.0693713	8.25912
			69.441	11.68	1.23863	1.77824					3.437	45.328	0.0613063	6.90103					77.49	6.252	1.35312	1.23392					2.3	45.613	0.0401624	9.0024					35.867	7.286	0.729232	1.34172					0.86	41.902	0.0174851	7.71625
			2.89	3.583	0.0515494	0.545499					1.908	19.662	0.0340333	2.99347					101.511	7.919	1.77257	1.56293					1.398	48.655	0.0244117	9.60278					32.604	6.188	0.66289	1.13952					0.881	32.921	0.0179121	6.0624
			52.837	9.953	0.942462	1.51531					7.034	12.516	0.125467	1.90552					56.484	4.837	0.986318	0.954653					1.513	41.235	0.0264199	8.13833					24.434	7.378	0.496781	1.35866					1.69	28.478	0.0343603	5.24422
			48.975	10.29	0.873575	1.56662					3.922	19.671	0.0699573	2.99484					70.02	7.294	1.22268	1.43958					1.006	37.829	0.0175667	7.46611					0.816	3.643	0.0165905	0.670858					1.505	63.997	0.030599	11.785
			49.891	10.478	0.889914	1.59524					5.062	10.068	0.0902917	1.53282					82.083	6.645	1.43332	1.31149					2.448	34.472	0.0427467	6.80356					46.807	6.098	0.951659	1.12295					23.127	1.162	0.470208	0.213982
			33.835	8.171	0.60352	1.24401					1.937	52.433	0.0345506	7.98274					69.351	5.978	1.211	1.17985					4.795	41.196	0.0837298	8.13064					40.463	7.325	0.822676	1.3489					2.167	40.195	0.0440585	7.40191
			50.584	11.563	0.902275	1.76043					7.175	46.665	0.127982	7.10459					86.371	7.131	1.5082	1.40741					1.455	38.004	0.0254071	7.50065					23.658	5.514	0.481004	1.0154					2.358	36.986	0.0479418	6.81097
			45.99	10.699	0.820331	1.62889					2.709	20.475	0.0483209	3.11725					64.301	5.79	1.12282	1.14274					21.511	2.127	0.375623	0.419795					31.344	6.535	0.637272	1.20342					23.831	0.881	0.484521	0.162236
			50.448	9.857	0.899849	1.50069					1.769	38.074	0.0315539	5.79664					65.362	6.715	1.14134	1.3253					55.863	1.411	0.975474	0.278482					39.143	8.374	0.795838	1.54207					0.347	0.726	0.00705505	0.133693
			48.611	10.576	0.867082	1.61016					30.922	0.95	0.551561	0.144634					67.5	5.796	1.17868	1.14393					2.233	43.438	0.0389924	8.57313					22.623	4.77	0.459961	0.878395					1.538	37.973	0.0312699	6.99273
			49.048	9.016	0.874877	1.37266					2.074	38.595	0.0369943	5.87596					63.289	5.958	1.10515	1.1759					1.497	37.803	0.0261405	7.46098					42.755	6.9	0.869275	1.27063					1.244	52.743	0.0252924	9.71262
			38.824	10.423	0.69251	1.58687					8.566	8.788	0.152793	1.33794					69.628	5.114	1.21584	1.00932					1.243	38.875	0.0217051	7.67255					39.126	7.845	0.795492	1.44466					1.586	38.335	0.0322458	7.05939
			63.255	10.213	1.12829	1.55489					6.274	10.347	0.11191	1.5753					64.556	5.29	1.12727	1.04406					1.207	49.052	0.0210765	9.68113					22.97	5.9	0.467016	1.08648					1.171	31.935	0.0238082	5.88083
			55.564	10.139	0.991104	1.54363					3.837	39.133	0.0684412	5.95787					69.484	5.726	1.21332	1.13011					0.929	29.333	0.0162221	5.7893					36.544	7.323	0.742996	1.34853					1.27	37.528	0.0258211	6.91078
			28.979	8.744	0.516903	1.33124					7.17	11.819	0.127892	1.7994					81.332	6.838	1.42021	1.34958					1.671	52.782	0.0291788	10.4173					40.582	6.631	0.825095	1.2211					1.524	54.344	0.0309853	10.0074
			55.359	8.967	0.987447	1.3652					10.887	10.887	0.194193	1.65751					73.806	6.727	1.28879	1.32767					38.195	2.121	0.666957	0.418611					39.712	7.996	0.807407	1.47246					33.882	1.073	0.688874	0.197593
			26.104	10.046	0.465621	1.52947					3.931	31.973	0.0701179	4.86778					61.322	5.586	1.0708	1.10248					25.949	1.004	0.453119	0.198154					27.974	6.04	0.568755	1.11227					7.451	20.997	0.15149	3.8666
			49.842	10.063	0.88904	1.53206					32.952	0.938	0.58777	0.142807					63.569	4.889	1.11004	0.964916					2.603	50.294	0.0454533	9.92626					45.317	6.91	0.921365	1.27248					2.519	36.403	0.0512152	6.70361
			29.166	10.369	0.520239	1.57864					8.332	25.422	0.148619	3.87041					93.794	6.112	1.63782	1.20629					1.289	44.129	0.0225084	8.70951					34.64	6.708	0.704285	1.23528					1.327	56.308	0.02698	10.3691
			56.162	10.987	1.00177	1.67273					35.391	1.54	0.631275	0.23446					55.335	5.073	0.966254	1.00123					1.511	35.224	0.0263849	6.95197					43.142	9.025	0.877144	1.66195					2.278	16.574	0.0463153	3.0521
			28.095	11.255	0.501135	1.71354					3.108	14.332	0.0554379	2.182					76.839	5.734	1.34175	1.13169					36.518	0.947	0.637674	0.186904					2.798	1.517	0.0568877	0.279355					1.106	29.952	0.0224867	5.51566
			55.122	10.435	0.98322	1.58869					6.609	16.959	0.117886	2.58195					76.041	7.148	1.32782	1.41076					36.678	0.988	0.640468	0.194996					28.392	6.329	0.577253	1.16548					22.938	6.79	0.466365	1.25038
			61.818	10.782	1.10266	1.64152					1.892	15.64	0.0337479	2.38114					77.386	6.084	1.35131	1.20077					1.285	48.19	0.0224385	9.511					26.246	7.562	0.533622	1.39254					2.895	33.972	0.0588598	6.25594
			43.348	9.249	0.773205	1.40813					15.707	12.176	0.280168	1.85375					74.249	5.726	1.29653	1.13011					1.558	36.106	0.0272056	7.12605					38.761	7.717	0.788071	1.42109					1.781	62.593	0.0362105	11.5265
			50.389	8.658	0.898797	1.31815					5.474	30.729	0.0976406	4.67838					70.372	5.976	1.22883	1.17945					1.638	43.054	0.0286026	8.49734					43.945	7.004	0.89347	1.28979					26.902	1.4	0.546959	0.25781
			47.471	8.212	0.846748	1.25025					23.146	1.283	0.412859	0.195332					67.366	6.569	1.17634	1.29649					29.028	0.773	0.506884	0.152563					13.664	5.195	0.27781	0.956659					0.786	14.662	0.0159806	2.70001
			0.859	2.14	0.0153221	0.325808					3.312	13.737	0.0590767	2.09141					77.137	7.048	1.34696	1.39103					1.738	39.257	0.0303488	7.74795					39.449	9.093	0.802059	1.67448					1.705	67.338	0.0346653	12.4003
			33.756	10.876	0.602111	1.65583					2.827	17.375	0.0504256	2.64528					68.737	5.226	1.20028	1.03143					1.643	38.133	0.0286899	7.52611					40.33	7.342	0.819971	1.35203					4.658	0.93	0.0947044	0.171259
			25.751	9.319	0.459325	1.41879					28.73	1.038	0.512462	0.158032					78.764	7.437	1.37537	1.4678					25.476	0.812	0.444859	0.16026					35.433	6.65	0.720408	1.2246					1.128	42.927	0.022934	7.905
			47.728	9.466	0.851332	1.44117					9.054	23.896	0.161498	3.63808					58.841	6.189	1.02748	1.22149					1.751	48.205	0.0305758	9.51396					26.735	7.86	0.543564	1.44742					0.802	15.291	0.0163059	2.81584
			2.222	2.51	0.0396342	0.382139					9.077	26.096	0.161908	3.97303					72.468	5.094	1.26543	1.00538					1.45	40.11	0.0253198	7.9163					45.282	7.003	0.920653	1.2896					9.743	0.928	0.19809	0.170891
			24.97	9.131	0.445394	1.39016					0.444	0.758	0.0079197	0.115403					89.823	9.909	1.56848	1.95569					1.631	22.675	0.0284804	4.47524					34.416	7.028	0.699731	1.29421					25.931	1.15	0.527217	0.211772
			39.198	10.793	0.699181	1.6432					5.964	33.665	0.106381	5.12538					66.066	6.469	1.15364	1.27675					20.001	1.013	0.349255	0.19993					36.271	8.433	0.737446	1.55294					5.287	1.526	0.107493	0.281013
			42.28	9.964	0.754155	1.51698					3.753	24.471	0.0669428	3.72563					93.104	6.373	1.62577	1.25781					0.752	20.349	0.0131313	4.01617					21.507	7.917	0.437271	1.45792					1.248	31.442	0.0253738	5.79004
			38.003	9.996	0.677865	1.52186					2.824	24.329	0.0503721	3.70401					65.754	4.48	1.14819	0.884194					1.803	56.257	0.0314838	11.1031					28.973	7.134	0.589066	1.31373					1.694	23.087	0.0344416	4.25147
			43.814	10.113	0.781517	1.53967					24.333	17.125	0.434032	2.60722					31.889	4.58	0.556842	0.90393					1.232	34.555	0.0215131	6.81994					41.099	8.802	0.835606	1.62089					13.103	1.148	0.266404	0.211404
			46.913	11.002	0.836795	1.67502					14.475	14.234	0.258193	2.16708					72.858	6.59	1.27224	1.30063					1.358	32.615	0.0237133	6.43705					36.363	8.254	0.739316	1.51997					0.947	28.983	0.019254	5.33722
			24.555	11.626	0.437991	1.77002					3.701	25.854	0.0660153	3.93618					71.066	7.269	1.24095	1.43464					1.091	45.307	0.0190509	8.942					50.991	8.464	1.03673	1.55865					7.02	26.69	0.142727	4.91496
			29.429	11.86	0.52493	1.80564					17.122	11.13	0.305408	1.6945					73.063	5.738	1.27582	1.13248					1.001	34.605	0.0174794	6.82981					38.05	8.008	0.773616	1.47467					0.968	28.534	0.0196809	5.25453
			1.676	1.855	0.0298951	0.282417					3.118	15.034	0.0556163	2.28887					75.481	7.596	1.31804	1.49918					0.937	49.083	0.0163618	9.68725					21.043	9.957	0.427837	1.83358					3.732	48.726	0.0758773	8.97289
			35.559	10.556	0.634271	1.60711					2.831	34.186	0.050497	5.2047					82.349	5.657	1.43797	1.11649					0.906	29.385	0.0158205	5.79956					24.451	7.887	0.497127	1.45239					5.837	43.436	0.118675	7.99874
			24.944	12.895	0.44493	1.96322					3.517	14.706	0.0627333	2.23894					90.706	6.951	1.5839	1.37188					1.122	41.758	0.0195922	8.24155					34.569	8.638	0.702841	1.59069					0.999	51.719	0.0203112	9.52405
			34.675	9.49	0.618503	1.44482					2.986	29.072	0.0532618	4.42611					72.168	7.424	1.26019	1.46524					0.782	13.116	0.0136552	2.58864					35.748	8.571	0.726812	1.57835					11.75	1.076	0.238896	0.198145
			34.187	10.714	0.609799	1.63117					2.59	30.662	0.0461982	4.66818					62.681	5.279	1.09453	1.04189					0.827	25.227	0.014441	4.97892					50.273	7.896	1.02213	1.45405					1.004	41.031	0.0204129	7.55586
			25.798	9.561	0.460163	1.45563					3.867	26.368	0.0689763	4.01444					42.029	5.21	0.733906	1.02827					0.832	29.712	0.0145283	5.8641					22.38	10.661	0.45502	1.96322					2.096	28.383	0.0426149	5.22673
			27.731	9.918	0.494642	1.50998					2.599	30.054	0.0463588	4.57562					61.371	5.723	1.07165	1.12952					1.47	48.126	0.025669	9.49837					45.03	9.33	0.91553	1.71812					0.957	44.467	0.0194573	8.1886
			41.745	10.485	0.744612	1.59631					34.766	0.834	0.620127	0.126974					77.933	6.916	1.36086	1.36497					1.354	34.119	0.0236434	6.73389					31.949	6.879	0.649573	1.26677					1.367	43.675	0.0277932	8.04275
			26.091	13.218	0.465389	2.0124					4.475	17.758	0.0798213	2.70359					60.996	7.028	1.06511	1.38708					0.841	43.337	0.0146855	8.55319					29.084	8.28	0.591323	1.52476					1.886	27.854	0.0383453	5.12931
			27.609	10.511	0.492466	1.60026					2.765	24.174	0.0493197	3.68041					66.76	6.493	1.16576	1.28149					1.191	28.21	0.0207971	5.56766					30.352	7.37	0.617103	1.35719					28.439	13.185	0.578209	2.42802
			28.677	11.572	0.511516	1.7618					4.4	16.215	0.0784835	2.46868					65.164	5.641	1.13789	1.11333					1.72	74.307	0.0300345	14.6656					37.814	7.101	0.768817	1.30765					1.175	43.915	0.0238896	8.08694
			28.204	12.444	0.503079	1.89456					1.607	34.287	0.0286643	5.22008					77.901	6.009	1.3603	1.18596					0.69	5.851	0.0120487	1.15478					20.106	7.516	0.408786	1.38407					1.811	47.649	0.0368204	8.77456
			28.248	11.203	0.503864	1.70562					2.541	31.199	0.0453242	4.74994					41.215	5.053	0.719692	0.997284					0.808	27.087	0.0141092	5.34602					30.321	8.412	0.616473	1.54907					0.911	50.871	0.018522	9.36789
			15.183	10.899	0.270822	1.65934					15.782	0.872	0.281506	0.132759					68.608	7.391	1.19803	1.45872					0.82	7.428	0.0143188	1.46602					47.328	6.624	0.962252	1.21981					0.953	41.628	0.019376	7.66579
			27.89	11.44	0.497478	1.7417					32.95	0.683	0.587734	0.103984					82.65	7.23	1.44323	1.42695					2.098	45.464	0.0366351	8.97299					31.766	7.149	0.645852	1.31649					28.269	1.203	0.574753	0.221532
			20.917	12.364	0.3731	1.88238					3.813	15.903	0.0680131	2.42118					75.721	6.338	1.32223	1.2509					1.341	19.025	0.0234164	3.75486					15.529	1.716	0.315729	0.316001					23.586	0.857	0.47954	0.157816
			13.478	12.335	0.240409	1.87796					3.906	14.415	0.0696719	2.19463					72.928	7.917	1.27346	1.56254					0.958	50.25	0.0167285	9.91758					31.529	6.677	0.641033	1.22957					0.961	22.869	0.0195386	4.21132
			26.153	12.58	0.466495	1.91526					2.486	10.656	0.0443432	1.62234					66.731	5.463	1.16525	1.0782					1.558	30.586	0.0272056	6.0366					33.161	7.771	0.674215	1.43103					0.903	53.173	0.0183594	9.7918
			24.673	11.528	0.440096	1.7551					4.464	13.904	0.0796251	2.11684					46.982	4.159	0.820395	0.82084					2.253	46.893	0.0393417	9.25502					37.043	8.124	0.753142	1.49603					27.787	1.248	0.564953	0.229819
			21.423	10.756	0.382125	1.63756					2.17	25.966	0.0387066	3.95323					36.738	5.35	0.641515	1.0559					2.059	45.018	0.035954	8.88496					25.931	6.273	0.527217	1.15517					2.598	63.877	0.0528214	11.7629
			16.663	11.841	0.297221	1.80275					2.624	15.268	0.0468047	2.3245					83.938	6.927	1.46572	1.36715					2.015	41.603	0.0351857	8.21096					61.151	7.176	1.24329	1.32146					10.462	18.801	0.212709	3.4622
			24.255	11.69	0.43264	1.77976					3.974	19.229	0.0708849	2.92755					80.193	6.809	1.40032	1.34386					2.004	45.372	0.0349936	8.95483					39.228	8.283	0.797566	1.52531					5.409	0.978	0.109973	0.180099
			68.619	7.175	1.22397	1.09237					4.81	23.138	0.0857967	3.52268					66.506	7.454	1.16132	1.47116					1.45	35.382	0.0253198	6.98316					42.469	5.375	0.863461	0.989806					15.777	1.559	0.320771	0.28709
			42.878	9.149	0.764822	1.3929					3.106	9.634	0.0554022	1.46674					78.975	6.877	1.37905	1.35728					0.864	32.72	0.0150871	6.45777					0.575	14.18	0.0116906	2.61125					28.635	0.999	0.582194	0.183966
			82.958	7.236	1.47973	1.10166					18.162	11.704	0.323958	1.78189					45.216	3.979	0.789557	0.785314					1.062	20.205	0.0185445	3.98775					55.622	8.611	1.13088	1.58572					15.677	1.559	0.318738	0.28709
			45.293	7.487	0.807898	1.13987					10.995	25.295	0.19612	3.85108					47.037	5.479	0.821355	1.08136					0.768	48.685	0.0134107	9.6087					52.03	8.901	1.05785	1.63912					32.854	1.163	0.667973	0.214166
			81.665	7.538	1.45667	1.14763					4.507	19.595	0.0803921	2.98327					46.933	6.969	0.819539	1.37543					1.902	41.719	0.0332125	8.23386					60.937	9.662	1.23894	1.77926					6.217	39.407	0.126401	7.2568
			85.254	9.021	1.52069	1.37342					10.972	23.143	0.195709	3.52344					68.674	7.584	1.19918	1.49681					1.09	21.184	0.0190335	4.18097					42.494	9.642	0.863969	1.77557					18.951	1.531	0.385303	0.281934
			78.575	8.794	1.40155	1.33886					3.609	10.422	0.0643743	1.58671					63.994	8.272	1.11746	1.6326					2.518	36.026	0.0439691	7.11026					41.216	9.829	0.837985	1.81001					1.553	69.345	0.0315749	12.7699
			84.004	7.886	1.49839	1.20062					0.843	23.254	0.0150367	3.54034					27.794	6.513	0.485336	1.28544					1.632	46.165	0.0284978	9.11134					45.856	10.592	0.932324	1.95052					17.792	30.365	0.361739	5.59171
			84.967	9.529	1.51557	1.45076					6.01	11.662	0.107201	1.7755					14.974	7.487	0.261474	1.47767					1.291	36.894	0.0225433	7.28157					42.376	11.451	0.86157	2.1087					35.93	1.349	0.730513	0.248418
			71.143	8.405	1.26899	1.27963					4.472	16.281	0.0797678	2.47873					46.531	7.219	0.81252	1.42478					0.985	20.777	0.0172	4.10065					56.089	9.362	1.14038	1.72401					22.333	1.462	0.454065	0.269227
			89.316	7.593	1.59314	1.15601					0.648	8.835	0.0115585	1.3451					49.652	6.961	0.867018	1.37386					0.712	19.508	0.0124329	3.85019					35.052	6.857	0.712662	1.26272					2.832	42.815	0.057579	7.88438
			63.981	8.033	1.14124	1.223					2.542	9.187	0.0453421	1.39869					59.319	6.616	1.03582	1.30576					1.006	20.519	0.0175667	4.04973					58.293	9.393	1.18519	1.72972					1.481	74.057	0.030111	13.6376
			69.199	7.574	1.23431	1.15312					9.842	11.503	0.175553	1.75129					58.798	5.915	1.02672	1.16741					1.557	37.242	0.0271882	7.35026					46.894	7.329	0.953428	1.34963					34.942	1.627	0.710425	0.299612
			78.861	8.117	1.40666	1.23579					3.8	17.896	0.0677812	2.7246					84.9	6.944	1.48252	1.3705					0.848	43.364	0.0148077	8.55852					54.768	6.495	1.11352	1.19605					0.838	2.619	0.0170378	0.482289
			88.876	7.047	1.5853	1.07288					2.591	8.518	0.0462161	1.29684					48.378	5.894	0.844772	1.16327					1.334	30.633	0.0232942	6.04587					33.14	6.134	0.673788	1.12958					33.05	1.344	0.671958	0.247498
			84.588	6.763	1.50881	1.02964					3.565	22.852	0.0635895	3.47914					44.603	5.747	0.778853	1.13425					0.64	36.715	0.0111756	7.24624					64.056	9.225	1.30236	1.69878					2.706	36.135	0.0550172	6.65426
			72.595	7.106	1.29489	1.08186					11.182	23.188	0.199455	3.53029					54.6	6.544	0.95342	1.29155					1.882	40.723	0.0328633	8.03728					43.949	6.816	0.893551	1.25517					21.366	1.309	0.434404	0.241052
			67.052	9.413	1.19602	1.4331					6.868	7.894	0.122506	1.20183					52.669	6.09	0.919701	1.20195					1.282	36.969	0.0223862	7.29638					51.044	8.532	1.0378	1.57117					0.943	28.955	0.0191727	5.33206
			81.188	7.196	1.44816	1.09557					2.824	13.319	0.0503721	2.02777					59.438	5.721	1.0379	1.12912					1.553	36.155	0.0271183	7.13572					56.748	8.703	1.15377	1.60266					37.305	1.476	0.758469	0.271805
			77.3	6.692	1.37881	1.01883					5.818	10.138	0.103777	1.54348					52.586	3.533	0.918251	0.697289					2.113	39.068	0.036897	7.71064					65.501	8.653	1.33174	1.59345					2.054	45.298	0.041761	8.34162
			64.649	8.458	1.15315	1.2877					4.296	10.106	0.0766284	1.5386					44.327	2.142	0.774034	0.422755					1.827	58.181	0.0319029	11.4829					39.914	6.523	0.811514	1.20121					0.849	23.663	0.0172615	4.35754
			73.701	6.521	1.31462	0.9928					1.543	16.572	0.0275227	2.52303					50.532	4.801	0.882385	0.947548					0.651	26.436	0.0113677	5.21753					63.956	8.313	1.30032	1.53084					24.592	43.169	0.499993	7.94957
			81.39	6.818	1.45177	1.03802					3.131	11.878	0.0558481	1.80838					39.913	2.438	0.696957	0.481175					2.505	38.456	0.0437421	7.58986					53.2	6.075	1.08164	1.11871					2.406	42.253	0.0489177	7.78089
			71.992	6.617	1.28413	1.00742					1.745	7.633	0.0311258	1.1621					48.439	4.264	0.845837	0.841563					1.159	50.348	0.0202383	9.93692					52.198	8.378	1.06127	1.54281					1.624	66.191	0.0330184	12.1891
			68.405	6.339	1.22015	0.965091					4.96	8.695	0.0884723	1.32378					34.858	2.729	0.608687	0.538608					1.103	27.017	0.0192605	5.3322					40.497	6.496	0.823367	1.19624					0.667	11.344	0.0135611	2.089
			64.624	7.071	1.15271	1.07654					6.547	12.36	0.11678	1.88177					34.221	2.548	0.597564	0.502885					2.706	43.128	0.0472519	8.51194					53.728	7.123	1.09237	1.3117					0.727	21.698	0.014781	3.99569
			75.607	6.744	1.34861	1.02675					2.573	8.821	0.045895	1.34297					42.148	3.237	0.735984	0.63887					0.642	25.784	0.0112105	5.08885					51.892	7.91	1.05504	1.45663					0.713	19.214	0.0144964	3.53826
			69.462	7.193	1.239	1.09511					3.784	19.305	0.0674958	2.93912					39.343	3.011	0.687003	0.594265					1.402	41.33	0.0244816	8.15708					52.488	7.715	1.06716	1.42072					1.04	47.352	0.0211448	8.71987
			80.389	8.737	1.43391	1.33018					13.609	6.372	0.242746	0.970115					40.388	2.997	0.705251	0.591502					1.87	37.178	0.0326537	7.33762					63.127	7.03	1.28347	1.29457					0.498	1.46	0.0101251	0.268859
			73.867	6.292	1.31758	0.957935					4.208	13.048	0.0750588	1.98651					37.874	2.457	0.661352	0.484925					3.194	51.167	0.0557733	10.0986					49.308	8.092	1.00251	1.49014					0.988	74.163	0.0200876	13.6571
			85.16	6.6	1.51901	1.00483					3.502	8.355	0.0624657	1.27202					35.165	2.199	0.614048	0.434005					1.356	31.226	0.0236783	6.16291					54.799	9.071	1.11415	1.67042					1.002	78.472	0.0203722	14.4506
			86.742	7.196	1.54723	1.09557					8.299	6.168	0.148031	0.939057					27.138	3.257	0.473881	0.642817					1.505	36.18	0.0262802	7.14065					59.651	8.019	1.2128	1.4767					14.065	14.295	0.285963	2.63242
			74.78	6.329	1.33386	0.963569					11.912	7.207	0.212476	1.09724					39.855	2.822	0.695944	0.556963					1.331	43.169	0.0232418	8.52004					66.998	7.156	1.36217	1.31778					7.643	15.119	0.155394	2.78416
			79.624	6.289	1.42027	0.957479					2.836	21.866	0.0505862	3.32902					35.274	2.664	0.615951	0.52578					0.522	1.862	0.00911511	0.367493					56.311	9.787	1.14489	1.80228					16.003	16.972	0.325366	3.12539
			63.199	5.951	1.12729	0.906019					7.682	5.965	0.137025	0.908151					51.162	5.707	0.893386	1.12636					2.098	35.077	0.0366351	6.92296					49.614	9.143	1.00873	1.68368					0.688	19.317	0.0139881	3.55722
			77.544	6.202	1.38316	0.944233					11.413	16.816	0.203575	2.56018					41.238	2.918	0.720094	0.57591					1.24	29.968	0.0216528	5.91463					56.766	9.283	1.15414	1.70946					8.144	18.68	0.16558	3.43992
			46.864	5.362	0.835921	0.816346					4.067	15.877	0.0725437	2.41722					39.203	2.956	0.684559	0.58341					1.609	35.747	0.0280962	7.0552					44.274	8.5	0.900159	1.56527					5.622	7.902	0.114304	1.45515
			67.424	6.133	1.20265	0.933728					2.096	25.862	0.0373867	3.9374					47.174	3.014	0.823748	0.594857					1.897	37.232	0.0331252	7.34828					25.867	6.288	0.525916	1.15793					0.973	75.604	0.0197826	13.9225
			76.224	7.903	1.35962	1.2032					20.54	15.609	0.366375	2.37642					37.593	2.66	0.656445	0.52499					1.723	42.247	0.0300869	8.33807					16.122	8.554	0.327785	1.57522					6.85	13.644	0.139271	2.51254
			69.636	6.478	1.24211	0.986253					2.618	9.218	0.0466977	1.40341					33.317	2.288	0.581778	0.45157					2.022	43.92	0.035308	8.66826					42.338	10.489	0.860797	1.93155					1.779	41.396	0.0361698	7.62307
			71.531	6.549	1.27591	0.997063					3.637	15.7	0.0648737	2.39027					47.393	3.753	0.827572	0.74071					1.905	27.022	0.0332649	5.33319					53.069	10.464	1.07898	1.92694					1.811	43.089	0.0368204	7.93484
			75.651	6.803	1.3494	1.03573					2.563	10.083	0.0457166	1.5351					56.087	4.873	0.979385	0.961758					1.294	36.191	0.0225957	7.14283					17.784	6.501	0.361576	1.19716					0.649	1.801	0.0131952	0.331654
			67.555	6.309	1.20499	0.960524					2.452	17.821	0.0437367	2.71319					60.087	4.739	1.04923	0.935311					1.932	49.044	0.0337364	9.67955					0.488	2.007	0.0099218	0.369589					4.036	2.472	0.0820581	0.455219
			57.905	6.704	1.03286	1.02066					3.473	29.715	0.0619484	4.52401					49.155	3.277	0.85834	0.646764					0.535	24.601	0.00934212	4.85537					0.562	12.328	0.0114263	2.2702					3.203	2.36	0.065122	0.434594
			43.991	6.675	0.784674	1.01625					2.288	16.746	0.0408114	2.54952					33.865	2.453	0.591347	0.484136					2.238	32.159	0.0390797	6.34705					0.383	4.554	0.00778698	0.838619					1.732	39.904	0.0352142	7.34832
			73.795	5.551	1.31629	0.845121					5.269	23.43	0.093984	3.56714					61.778	4.633	1.07876	0.914391					1.548	43.149	0.027031	8.51609					21.841	7.72	0.444061	1.42164					1.909	34.198	0.0388129	6.29756
			45.215	6.335	0.806507	0.964482					3.442	14.908	0.0613955	2.26969					41.085	3.093	0.717422	0.610449					1.735	39.267	0.0302964	7.74992					27.265	8.699	0.55434	1.60192					0.445	1.482	0.00904754	0.27291
			70.191	8.035	1.25201	1.2233					8.477	17.614	0.151206	2.68167					44.639	4.442	0.779482	0.876694					1.614	43.094	0.0281835	8.50523					0.407	5.166	0.00827494	0.951319					1.819	39.129	0.0369831	7.2056
			81.679	6.474	1.45692	0.985644					3.133	9.905	0.0558838	1.508					65	4.577	1.13502	0.903338					1.457	39.092	0.025442	7.71538					23.102	6.667	0.469699	1.22773					0.944	58.036	0.019193	10.6873
			68.986	5.827	1.23051	0.887141					2.249	19.732	0.0401158	3.00413					35.159	5.027	0.613943	0.992152					2.075	45.406	0.0362334	8.96154					18.34	6.874	0.372881	1.26585					0.341	1.859	0.00693306	0.342335
			81.175	6.377	1.44793	0.970876					6.661	12.708	0.118813	1.93475					39.354	3.276	0.687196	0.646567					1.781	45.364	0.0310996	8.95325					25.317	7.636	0.514734	1.40617					0.735	41.52	0.0149437	7.64591
			69.49	7.253	1.2395	1.10424					6.274	11.603	0.11191	1.76652					55.176	4.19	0.963478	0.826958					1.921	34.397	0.0335443	6.78875					28.63	5.931	0.582092	1.09219					0.714	44.578	0.0145167	8.20904
			84.453	6.851	1.5064	1.04304					4.441	14.13	0.0792148	2.15124					40.288	4.145	0.703505	0.818077					0.755	26.194	0.0131837	5.16977					30.544	7.201	0.621007	1.32606					0.681	42.391	0.0138458	7.8063
			61.467	8.061	1.0964	1.22726					11.607	14.735	0.207036	2.24335					43.895	3.196	0.76649	0.630778					1.592	42.128	0.0277993	8.31458					41.313	5.99	0.839957	1.10306					1.263	39.166	0.0256787	7.21242
			58.267	7.32	1.03932	1.11444					1.802	31.444	0.0321426	4.78724					51.524	4.052	0.899707	0.799722					29.665	0.67	0.518007	0.132234					50.245	6.276	1.02156	1.15573					1.439	59.888	0.0292571	11.0284
			64.304	4.926	1.147	0.749967					4.109	12.318	0.0732929	1.87537					59.34	4.636	1.03619	0.914983					22.316	0.673	0.38968	0.132826					45.1	3.79	0.916953	0.697928					0.804	16.836	0.0163466	3.10035
			69.658	6.206	1.2425	0.944842					4.832	38.322	0.0861891	5.83439					53.531	4.379	0.934753	0.86426					0.351	0.779	0.00612913	0.153747					66.571	4.091	1.35349	0.753357					1.086	30.533	0.0220801	5.62265
			64.068	6.498	1.14279	0.989298					4.903	9.537	0.0874556	1.45198					47.297	3.902	0.825895	0.770117					19.299	0.965	0.336997	0.190457					69.433	8.815	1.41168	1.62328					2.201	29.762	0.0447497	5.48067
			58.315	8.965	1.04017	1.36489					4.352	17.834	0.0776273	2.71517					37.322	2.998	0.651713	0.591699					0.654	15.744	0.0114201	3.10731					63.264	7.286	1.28626	1.34172					0.566	27.654	0.0115077	5.09248
			45.876	5.214	0.818297	0.793814					1.748	18.027	0.0311794	2.74455					33.918	2.213	0.592273	0.436768					0.675	15.97	0.0117868	3.15191					62.54	4.034	1.27154	0.742861					2.669	28.691	0.0542649	5.28345
			76.388	6.479	1.36254	0.986406					6.767	9.123	0.120704	1.38895					52.022	3.825	0.908403	0.75492					0.997	43.382	0.0174095	8.56208					67.728	5.389	1.37702	0.992384					2.181	27.931	0.0443431	5.14349
			59.007	6.041	1.05252	0.919722					2.672	36.611	0.0476609	5.5739					49.382	4.979	0.862303	0.982679					1.357	32.598	0.0236958	6.43369					68.676	8.141	1.39629	1.49916					2.439	48.323	0.0495887	8.89868
			71.986	6.452	1.28403	0.982295					15.976	7.861	0.284966	1.19681					50.53	3.986	0.88235	0.786696					0.863	47.06	0.0150696	9.28798					63.909	7.497	1.29937	1.38057					2.338	48.581	0.0475352	8.94619
			59.777	5.711	1.06625	0.86948					3.39	16.078	0.060468	2.44782					43.082	4.104	0.752293	0.809985					19.928	1.002	0.347981	0.197759					22.524	8.513	0.457948	1.56767					0.847	27.148	0.0172208	4.9993
			71.997	5.108	1.28422	0.777675					1.907	23.839	0.0340155	3.62941					37.741	2.724	0.659029	0.537621					0.934	16.676	0.0163094	3.29125					32.276	6.532	0.656221	1.20287					0.717	11.872	0.0145777	2.18623
			70.215	7.329	1.25244	1.11582					5.281	10.387	0.094198	1.58139					47.404	3.251	0.827764	0.641633					0.664	14.426	0.0115947	2.84718					51.012	6.777	1.03715	1.24798					0.775	11.382	0.015757	2.09599
			72.189	6.104	1.28765	0.929313					1.921	18.723	0.0342652	2.85051					52.894	4.866	0.92363	0.960377					0.649	12	0.0113328	2.36838					43.044	6.405	0.875151	1.17948					1.828	33.353	0.0371661	6.14195
			78.331	6.609	1.3972	1.0062					2.717	13.816	0.0484636	2.10344					53.286	4.464	0.930475	0.881036					0.738	11.966	0.0128869	2.36167					30.818	7.684	0.626578	1.41501					0.706	11.811	0.0143541	2.17499
			57.216	5.102	1.02057	0.776762					2.378	34.059	0.0424168	5.18537					50.247	4.613	0.877408	0.910443					0.564	14.949	0.00984851	2.9504					3.797	8.713	0.0771989	1.6045					0.673	10.566	0.0136831	1.94573
			60.034	5.358	1.07084	0.815737					2.854	36.761	0.0509072	5.59674					45.849	3.767	0.800611	0.743473					0.609	15.069	0.0106343	2.97409					43.597	6.992	0.886395	1.28758					1.83	48.268	0.0372067	8.88855
			69.456	5.566	1.2389	0.847404					0.4	10.54	0.00713486	1.60468					41.962	4.066	0.732736	0.802485					0.294	21.189	0.0051338	4.18196					22.549	7.154	0.458456	1.31741					1.643	32.364	0.0334047	5.95983
			60.262	4.697	1.0749	0.715102					6.045	10.128	0.107826	1.54195					61.463	3.813	1.07326	0.752552					0.82	29.409	0.0143188	5.8043					1.279	8.372	0.0260041	1.5417					0.784	27.073	0.0159399	4.98549
			58.113	4.843	1.03657	0.73733					14.976	3.28	0.267129	0.499369					46.751	4.397	0.816361	0.867813					0.799	41.082	0.0139521	8.10814					1.812	7.917	0.0368408	1.45792					0.77	21.486	0.0156553	3.95665
			60.911	6.868	1.08648	1.04563					0.411	9.578	0.00733107	1.45822					47.576	4.547	0.830767	0.897417					1.6	65.334	0.027939	12.8946					12.111	8.59	0.246235	1.58185					1.855	42.409	0.037715	7.80961
			64.022	7.438	1.14197	1.13241					3.219	19.061	0.0574178	2.90197					50.207	3.953	0.87671	0.780183					1.315	31.08	0.0229624	6.13409					74.24	7.332	1.50941	1.35019					0.38	1.434	0.00772599	0.264071
			72.89	5.691	1.30015	0.866435					3.962	21.74	0.0706708	3.30984					32.962	1.982	0.575579	0.391177					0.793	27.012	0.0138473	5.33122					28.456	6.948	0.578555	1.27947					2.763	61.237	0.0561761	11.2768
			78.008	8.013	1.39144	1.21995					4.838	19.888	0.0862962	3.02788					53.312	4.28	0.930929	0.844721					0.709	5.657	0.0123805	1.11649					48.996	6.102	0.996165	1.12368					3.183	59.9	0.0647153	11.0306
			69.418	4.565	1.23822	0.695006					11.013	14.44	0.196441	2.19844					25.937	3.156	0.452909	0.622883					0.786	7.238	0.0137251	1.42853					119.886	8.603	2.43747	1.58424					3.304	57.787	0.0671754	10.6415
			62.07	4.927	1.10715	0.750119					2.48	34.511	0.0442361	5.25418					50.384	4.574	0.8798	0.902746					0.936	48.53	0.0163443	9.57811					45.291	6.889	0.920836	1.26861					3.015	68.259	0.0612996	12.5699
			80.925	8.012	1.44347	1.2198					4.411	19.754	0.0786797	3.00748					44.142	4.399	0.770803	0.868207					1.283	29.393	0.0224036	5.80114					111.462	6.372	2.2662	1.1734					4.624	20.337	0.0940131	3.74506
			72.148	5.087	1.28692	0.774478					4.011	25.606	0.0715448	3.89843					17.555	1.941	0.306544	0.383085					0.715	29.906	0.0124853	5.90239					39.328	6.195	0.799599	1.14081					1.88	41.371	0.0382233	7.61847
			51.848	4.58	0.924821	0.697289					0.795	20.205	0.0141805	3.07614					59.869	4.302	1.04543	0.849063					2	42.897	0.0349238	8.46635					100.05	5.733	2.03417	1.05573					26.215	2.163	0.532992	0.398316
			57.14	6.416	1.01922	0.976814					1.911	18.224	0.0340868	2.77454					49.571	3.415	0.865604	0.674					1.425	56.887	0.0248832	11.2275					111.531	6.902	2.2676	1.271					0.306	1.539	0.00622145	0.283407
			62.462	6.023	1.11414	0.916981					33.832	0.981	0.603467	0.149354					18.586	2.546	0.324547	0.502491					0.829	31.235	0.0144759	6.16469					41.453	4.706	0.842804	0.86661					1.371	34.64	0.0278746	6.37895
			50.21	4.993	0.895604	0.760167					5.254	18.068	0.0937164	2.75079					50.775	4.423	0.886628	0.872944					1.392	38.361	0.024307	7.57111					49.852	7.16	1.01357	1.31851					0.724	29.547	0.01472	5.44108
			60.869	4.827	1.08573	0.734894					4.568	18.624	0.0814801	2.83544					53.786	4.301	0.939206	0.848866					0.71	45.937	0.0123979	9.06634					42.526	6.384	0.86462	1.17561					0.802	24.295	0.0163059	4.47392
			59.702	4.984	1.06491	0.758797					2.853	19.032	0.0508894	2.89756					29.787	2.612	0.520138	0.515517					2.476	37.096	0.0432357	7.32144					99.53	5.003	2.0236	0.921302					45.551	2.884	0.926122	0.531088
			67.363	5.223	1.20156	0.795184					2.761	16.783	0.0492484	2.55515					61.458	4.958	1.07317	0.978534					1.183	44.728	0.0206574	8.82773					56.128	7.522	1.14117	1.38518					36.385	2.686	0.739763	0.494627
			65.184	5.031	1.1627	0.765953					3.034	14.82	0.0541179	2.25629					41.741	4.755	0.728877	0.938469					1.249	36.2	0.0218099	7.1446					110.7	4.416	2.2507	0.813206					0.735	47.1	0.0149437	8.67346
			52.973	4.911	0.944888	0.747683					6.064	14.814	0.108165	2.25538					54.352	4.657	0.949089	0.919127					0.639	18.745	0.0111582	3.6996					106.336	4.816	2.16198	0.886866					3.179	34.628	0.064634	6.37674
			72.483	5.385	1.29289	0.819848					41.014	0.881	0.731573	0.134129					39.66	3.48	0.692539	0.686829					1.331	57.571	0.0232418	11.3625					103.025	8.274	2.09466	1.52366					0.795	35.756	0.0161636	6.58447
			61.82	6.424	1.10269	0.978032					5.616	18.548	0.100173	2.82387					47.763	3.901	0.834033	0.76992					0.82	41.015	0.0143188	8.09491					128.619	6.914	2.61502	1.27321					0.78	32.925	0.0158586	6.06314
			51.623	4.624	0.920808	0.703988					3.031	26.272	0.0540644	3.99982					39.738	3.126	0.693901	0.616962					1.315	30.685	0.0229624	6.05614					105.4	5.362	2.14295	0.987412					21.867	1.503	0.44459	0.276777
			56.607	4.54	1.00971	0.691199					2.816	24.655	0.0502294	3.75364					59.937	5.348	1.04661	1.05551					0.406	23.013	0.00708953	4.54195					2.784	1.464	0.056603	0.269596					2.837	37.981	0.0576806	6.9942
			85.219	6.79	1.52006	1.03375					1.859	36.67	0.0331593	5.58288					49.698	4.023	0.867821	0.793998					0.542	33.598	0.00946435	6.63106					81.971	4.431	1.6666	0.815968					0.962	59.243	0.019559	10.9096
			46.764	4.144	0.834137	0.63091					1.79	35.749	0.0319285	5.44266					41.658	4.134	0.727428	0.815906					1.747	40.365	0.0305059	7.96663					53.331	6.967	1.0843	1.28297					0.313	1.684	0.00636378	0.310108
			39.157	4.129	0.69845	0.628626					7.262	23.554	0.129533	3.58602					47.749	4.107	0.833788	0.810577					1.862	43.729	0.0325141	8.63056					112.453	4.542	2.28634	0.836409					1.174	9.205	0.0238692	1.6951
			73.632	7.288	1.31339	1.10957					4.752	42.835	0.0847622	6.52148					51.2	4.448	0.894049	0.877878					0.784	67.727	0.0136901	13.3669					85.288	4.892	1.73404	0.900861					0.956	27.494	0.019437	5.06302
			63.749	8.332	1.1371	1.26852					5.967	20.288	0.106434	3.08878					42.915	3.721	0.749377	0.734394					1.072	51.932	0.0187192	10.2495					5.741	1.276	0.116723	0.234975					2.737	57.984	0.0556475	10.6777
			50.897	4.343	0.907858	0.661207					2.77	29.512	0.0494089	4.4931					48.435	3.463	0.845767	0.683474					0.628	26.503	0.0109661	5.23076					86.385	4.612	1.75634	0.8493					0.831	8.784	0.0168955	1.61757
			51.282	5.178	0.914725	0.788333					2.799	18.252	0.0499262	2.7788					47.904	3.217	0.836495	0.634922					0.618	26.379	0.0107915	5.20628					104.814	4.808	2.13103	0.885393					2.369	1.269	0.0481654	0.233686
			55.272	4.951	0.985895	0.753773					2.197	21.643	0.0391882	3.29507					53.432	4.702	0.933024	0.928009					1.038	46.928	0.0181255	9.26193					43.739	5.254	0.889282	0.967524					4.063	1.19	0.0826071	0.219138
			72.531	5.043	1.29375	0.767779					2.366	28.837	0.0422027	4.39033					45.483	3.843	0.79422	0.758473					1.048	25.748	0.0183001	5.08175					123.611	6.12	2.5132	1.127					1.542	63.191	0.0313513	11.6366
			51.589	5.029	0.920201	0.765648					6.151	27.06	0.109716	4.11979					52.765	4.515	0.921377	0.891102					0.648	26.346	0.0113153	5.19977					81.781	4.812	1.66273	0.88613					1.85	11.405	0.0376134	2.10023
			47.685	4.259	0.850565	0.648418					7.635	13.304	0.136187	2.02549					35.677	3.345	0.622988	0.660185					1.355	40.213	0.0236609	7.93663					144.306	9.29	2.93396	1.71075					1.571	66.551	0.0319409	12.2554
			63.089	6.406	1.12533	0.975292					3.051	15.126	0.0544212	2.30288					51.143	5.196	0.893054	1.02551					0.772	66.899	0.0134806	13.2035					120.139	6.7	2.44261	1.2338					2.137	43.643	0.0434485	8.03686
			53.759	4.682	0.958908	0.712818					3.299	25.29	0.0588448	3.85032					50.244	3.749	0.877356	0.73992					1.374	31.556	0.0239926	6.22804					124.856	5.385	2.53852	0.991647					2.077	36.556	0.0422286	6.73179
			51.347	4.62	0.915884	0.703379					3.169	31.093	0.056526	4.7338					44.378	3.52	0.774924	0.694724					1.2	61.787	0.0209543	12.1946					91.936	4.597	1.8692	0.846537					2.239	29.98	0.0455223	5.52082
			59.587	4.507	1.06286	0.686175					7.415	26.491	0.132263	4.03316					48.261	3.291	0.842729	0.649527					1.573	38.139	0.0274676	7.52729					89.64	4.376	1.82252	0.80584					4.942	27.862	0.100479	5.13079
			68.532	7.437	1.22242	1.13226					2.662	32.931	0.0474825	5.01363					54.01	4.667	0.943117	0.921101					1.262	40.971	0.0220369	8.08623					46.204	5.158	0.939399	0.949845					2.295	29.898	0.0466609	5.50571
			63.958	5.712	1.14083	0.869632					2.686	28.989	0.0479106	4.41348					46.631	4.253	0.814266	0.839392					31.523	1.458	0.550451	0.287758					87.979	4.123	1.78875	0.75925					0.828	29.735	0.0168345	5.4757
			67.525	4.852	1.20445	0.7387					2.883	34.095	0.0514245	5.19085					60.244	3.605	1.05197	0.7115					2.322	37.544	0.0405465	7.40986					101.863	4.442	2.07103	0.817994					0.907	28.535	0.0184407	5.25472
			68.788	5.345	1.22698	0.813758					1.88	21.141	0.0335339	3.21864					53.191	2.915	0.928816	0.575318					1.256	30.878	0.0219321	6.09423					43.94	6.426	0.893368	1.18335					2.814	58.131	0.057213	10.7048
			70.028	6.099	1.2491	0.928552					3.017	28.322	0.0538147	4.31193					40.813	3.278	0.712672	0.646961					1.526	76.456	0.0266469	15.0897					97.872	4.651	1.98989	0.856481					1.914	51.599	0.0389146	9.50195
			66.214	5.513	1.18107	0.839335					2.689	27.284	0.0479641	4.1539					46.232	4.219	0.807298	0.832682					1.623	40.647	0.0283407	8.02228					91.701	4.827	1.86442	0.888892					39.796	0.817	0.809114	0.15045
			61.564	4.656	1.09813	0.70886					6.862	29.909	0.122399	4.55354					56.067	4.48	0.979036	0.884194					24.14	1.091	0.42153	0.215325					81.191	3.982	1.65074	0.733285					2.861	68.021	0.0581686	12.5261
			54.951	4.854	0.98017	0.739005					3.226	30.006	0.0575427	4.56831					40.887	3.505	0.713965	0.691763					1.232	40.52	0.0215131	7.99722					2.373	1.329	0.0482468	0.244735					0.834	23.03	0.0169565	4.24097
			32.561	7.895	0.580796	1.20199					5.082	33.795	0.0906484	5.14517					53.143	3.898	0.927978	0.769328					0.804	49.37	0.0140394	9.74389					82.648	4.006	1.68036	0.737705					0.74	39.783	0.0150453	7.32604
			63.294	4.601	1.12899	0.700486					25.227	0.74	0.449978	0.112662					47.612	2.89	0.831396	0.570384					0.522	20.506	0.00911511	4.04716					138.32	7.501	2.81226	1.38131					40.945	0.722	0.832475	0.132956
			77.516	7.231	1.38267	1.10089					6.923	28.197	0.123487	4.2929					57.814	3.48	1.00954	0.686829					1.025	53.666	0.0178984	10.5918					110.581	5.194	2.24828	0.956475					1.977	45.676	0.0401955	8.41123
			64.537	4.964	1.15116	0.755752					3.101	30.399	0.055313	4.62814					41.923	3.916	0.732055	0.77288					1.479	37.294	0.0258261	7.36052					125.456	6.039	2.55072	1.11208					0.43	1.567	0.00874257	0.288563
			59.445	5.965	1.06033	0.908151					0.829	24.503	0.014787	3.7305					55.665	4.692	0.972017	0.926035					1.399	39.949	0.0244292	7.88452					109.319	5.098	2.22262	0.938796					2.919	62.491	0.0593478	11.5077
			59.188	4.67	1.05575	0.710991					1.859	22.367	0.0331593	3.4053					51.77	3.505	0.904002	0.691763					1.429	39.036	0.0249531	7.70433					97.592	4.794	1.9842	0.882815					50.015	0.526	1.01688	0.0968629
			52.669	5.503	0.939465	0.837813					26.936	0.854	0.480462	0.130019					58.273	4.565	1.01756	0.90097					0.759	24.016	0.0132536	4.73991					84.185	4.16	1.71161	0.766064					3.542	63.901	0.0720144	11.7674
			81.903	9.072	1.46092	1.38118					8.078	24.78	0.144089	3.77267					44.741	4.459	0.781263	0.880049					25.285	1.22	0.441524	0.240785					87.334	4.307	1.77564	0.793134					3.509	62.463	0.0713434	11.5026
			50.996	5.42	0.909624	0.825176					2.617	38.374	0.0466798	5.84231					60.238	3.968	1.05187	0.783143					35.38	1.586	0.617802	0.31302					45.281	5.011	0.920633	0.922775					32.768	1.332	0.666224	0.245288
			63.311	4.705	1.12929	0.71632					4.462	29.103	0.0795894	4.43083					53.644	4.393	0.936726	0.867023					0.397	9.436	0.00693237	1.86233					85.558	4.051	1.73953	0.745991					39.792	0.624	0.809033	0.11491
			61.632	4.744	1.09934	0.722258					2.742	33.868	0.0489095	5.15629					53.631	4.47	0.936499	0.88222					0.939	26.85	0.0163967	5.29924					105.364	4.144	2.14221	0.763117					1.358	36.269	0.0276102	6.67893
			65.106	5.678	1.16131	0.864456					1.744	18.87	0.031108	2.87289					48.433	4.563	0.845732	0.900575					0.921	26.031	0.0160824	5.1376					77.16	3.866	1.56878	0.711924					2.756	56.102	0.0560338	10.3312
			78.218	6.595	1.39519	1.00407					3.775	25.062	0.0673353	3.8156					64.757	4.414	1.13078	0.871168					33.745	1.567	0.589252	0.30927					41.593	5.789	0.84565	1.06604					53.133	0.623	1.08028	0.114725
			61.937	4.732	1.10478	0.720431					13.395	27.065	0.238929	4.12055					53.461	3.396	0.933531	0.67025					0.562	16.731	0.00981359	3.30211					114.926	6.089	2.33662	1.12129					1.405	10.98	0.0285658	2.02197
			62.024	6.28	1.10633	0.956108					2.86	35.78	0.0510143	5.44738					44.438	3.294	0.775972	0.650119					0.379	7.755	0.00661806	1.53056					80.475	4.017	1.63618	0.73973					1.902	43.008	0.0386706	7.91992
			55.856	4.406	0.996312	0.670798					4.374	33.438	0.0780197	5.09082					43.695	4.6	0.762998	0.907878					20.027	1.075	0.349709	0.212167					84.347	3.412	1.71491	0.62832					2.348	10.756	0.0477385	1.98072
			69.27	4.621	1.23558	0.703531					3.537	26.383	0.06309	4.01672					53.91	4.46	0.941371	0.880247					24.804	1.002	0.433125	0.197759					75.818	3.359	1.5415	0.61856					0.799	15.166	0.0162449	2.79282
			55.233	4.16	0.9852	0.633346					6.417	27.486	0.114461	4.18465					32.128	2.841	0.561016	0.560713					0.88	58.575	0.0153665	11.5606					97.461	4.249	1.98153	0.782453					16.283	0.919	0.331059	0.169234
			48.388	5.266	0.863104	0.80173					6.309	35.82	0.112535	5.45347					45.868	3.326	0.800942	0.656435					21.289	0.972	0.371746	0.191838					98.338	6.112	1.99936	1.12552					1.181	36.158	0.0240116	6.65849
			42.916	3.866	0.765499	0.588585					1.558	19.854	0.0277903	3.0227					25.569	2.384	0.446483	0.470517					32.204	1.217	0.562343	0.240193					86.921	3.352	1.76724	0.617271					1.427	36.882	0.0290131	6.79182
			53.43	3.851	0.953039	0.586302					1.859	25.364	0.0331593	3.86158					25.569	2.14	0.446483	0.42236					24.365	1.093	0.425459	0.21572					75.41	4.2	1.5332	0.77343					0.755	33.903	0.0153503	6.24324
			68.272	4.837	1.21778	0.736417					5.159	26.885	0.0920219	4.09315					42.564	4.453	0.743248	0.878865					2.02	52.102	0.035273	10.2831					75.621	3.7	1.53749	0.681355					0.851	27.596	0.0173021	5.0818
			52.245	4.402	0.931902	0.670189					2.423	25.906	0.0432194	3.9441					41.607	4.104	0.726537	0.809985					1.353	33.116	0.0236259	6.53593					105.687	4.571	2.14878	0.841749					0.731	6.598	0.0148624	1.21502
			44.153	4.046	0.787564	0.61599					5.05	11.771	0.0900776	1.79209					32.843	4.224	0.573501	0.833668					0.539	24.349	0.00941196	4.80563					76.816	3.573	1.56179	0.657968					2.043	57.881	0.0415374	10.6588
			73.957	5.024	1.31918	0.764887					3.375	9.24	0.0602004	1.40676					42.699	3.522	0.745606	0.695118					1.041	22.34	0.0181778	4.40913					121.61	5.682	2.47252	1.04634					56.704	1.545	1.15288	0.284512
			54.865	5.172	0.978636	0.787419					1.437	19.445	0.025632	2.96043					51.875	4.768	0.905836	0.941035					0.528	29.558	0.00921988	5.83371					76.652	3.537	1.55845	0.651338					0.453	8.937	0.00921019	1.64575
			62.382	5.469	1.11272	0.832637					3.461	26.682	0.0617344	4.06224					54.808	3.491	0.957052	0.689					18.502	0.978	0.32308	0.193023					91.558	5.414	1.86152	0.996988					55.35	1.121	1.12535	0.206432
			52.165	4.272	0.930475	0.650397					4.382	31.917	0.0781624	4.85925					49.332	3.726	0.86143	0.735381					17.829	1.05	0.311328	0.207233					83.616	4.411	1.70004	0.812285					0.898	7.88	0.0182577	1.4511
			66.036	4.771	1.17789	0.726368					1.861	22.478	0.0331949	3.4222					42.76	4.594	0.746671	0.906693					1.214	39.98	0.0211987	7.89064					84.378	3.557	1.71554	0.655021					3.272	61.983	0.0665248	11.4142
			48.814	3.773	0.870703	0.574426					1.884	28.494	0.0336052	4.33811					46.077	3.673	0.804592	0.724921					1.811	46.984	0.0316235	9.27298					89.203	5.583	1.81364	1.02811					2.722	57.002	0.0553425	10.4969
			57.075	4.395	1.01806	0.669124					2.233	31.888	0.0398304	4.85484					46.588	3.169	0.813515	0.625449					1.231	55.56	0.0214956	10.9656					64.839	3.936	1.31828	0.724814					3.342	35.921	0.067948	6.61485
			80.18	7.032	1.43018	1.0706					2.384	17.96	0.0425238	2.73435					44.787	3.111	0.782066	0.614002					0.337	0.964	0.00588466	0.19026					104.712	3.9	2.12896	0.718185					2.214	57.18	0.0450141	10.5297
			50.301	4.269	0.897227	0.649941					3.997	29.232	0.0712951	4.45047					51.531	4.39	0.899829	0.866431					17.148	0.767	0.299437	0.151379					87.172	4.192	1.77234	0.771957					0.844	37.947	0.0171598	6.98794
			69.25	6.002	1.23522	0.913784					2.884	12.497	0.0514424	1.90263					47.759	3.796	0.833963	0.749196					5.787	21.48	0.101052	4.23939					98.964	3.288	2.01209	0.605485					4.592	0.412	0.0933625	0.0758698
			54.566	4.131	0.973302	0.628931					1.762	24.302	0.0314291	3.6999					46.506	3.223	0.812083	0.636106					0.86	54.994	0.0150172	10.8539					65.021	3.6	1.32198	0.66294					17.355	13.317	0.352854	2.45232
			44.759	3.317	0.798373	0.505002					1.897	29.74	0.0338371	4.52781					58.06	3.637	1.01384	0.717815					1.013	48.161	0.0176889	9.50528					96.365	5.474	1.95925	1.00804					2.252	42.326	0.0457867	7.79433
			60.675	4.241	1.08227	0.645678					3.15	15.028	0.056187	2.28796					49.188	4.179	0.858916	0.824787					0.917	47.084	0.0160126	9.29272					103.081	4.219	2.0958	0.776929					3.195	31.892	0.0649593	5.87291
			50.857	3.809	0.907144	0.579907					1.965	27.803	0.03505	4.23291					47.96	3.712	0.837473	0.732618					1.09	40.117	0.0190335	7.91768					57.878	3.199	1.17675	0.589096					3.023	33.715	0.0614623	6.20862
			88.134	8.125	1.57206	1.237					2.49	18.392	0.0444145	2.80012					64.975	4.698	1.13459	0.927219					1.392	43.214	0.024307	8.52892					89.58	3.962	1.8213	0.729602					2.117	54.937	0.0430419	10.1166
			59.465	3.384	1.06069	0.515202					2.424	23.831	0.0432373	3.62819					51.292	4.1	0.895656	0.809195					35.201	1.386	0.614676	0.273547					90.711	3.887	1.8443	0.715791					15.372	14.146	0.312537	2.60499
			56.482	4.162	1.00748	0.63365					2.09	18.158	0.0372797	2.76449					47.855	3.243	0.835639	0.640054					1.357	59.648	0.0236958	11.7724					88.819	3.591	1.80583	0.661282					0.954	29.811	0.0193963	5.48969
			52.804	4.292	0.941873	0.653442					3.447	25.82	0.0614847	3.93101					39.736	3.617	0.693866	0.713868					1.215	61.643	0.0212162	12.1662					103.954	5.126	2.11355	0.943953					0.876	16.116	0.0178104	2.96776
			64.855	5.236	1.15683	0.797163					2.057	27.327	0.036691	4.16044					44.196	3.929	0.771746	0.775446					8.575	1.098	0.149736	0.216706					71.752	3.316	1.45883	0.610641					10.15	15.378	0.206365	2.83186
			53.05	5.358	0.946261	0.815737					2.35	20.6	0.0419173	3.13628					56.244	3.535	0.982127	0.697684					1.568	76.604	0.0273803	15.1189					94.613	4.09	1.92363	0.753173					1.008	24.067	0.0204942	4.43194
			73.518	5.397	1.31135	0.821675					2.376	24.208	0.0423811	3.68559					52.837	3.86	0.922634	0.761828					1.806	41.641	0.0315362	8.21846					129.542	6.914	2.63379	1.27321					0.853	17.053	0.0173428	3.14031
			88.228	7.764	1.57374	1.18204					1.535	19.165	0.02738	2.91781					52.166	3.988	0.910917	0.78709					1.517	68.363	0.0264897	13.4924					82.83	3.594	1.68406	0.661835					1.209	38.396	0.0245808	7.07062
			44.367	3.46	0.791381	0.526773					2.536	17.013	0.045235	2.59017					49.03	2.996	0.856157	0.591305					1.338	41.419	0.023364	8.17465					95.545	4.358	1.94258	0.802525					5.26	31.82	0.106944	5.85965
			61.061	4.641	1.08915	0.706576					1.697	22.216	0.0302697	3.38231					38.279	8.713	0.668424	1.71964					0.93	51.158	0.0162396	10.0968					86.435	3.776	1.75736	0.69535					42.732	0.842	0.868808	0.155054
			61.46	4.581	1.09627	0.697442					2.089	17.915	0.0372618	2.7275					46.081	8.424	0.804662	1.6626					0.53	23.995	0.00925481	4.73577					83.69	4.07	1.70155	0.74949					0.884	34.859	0.0179731	6.41928
			48.446	3.909	0.864139	0.595132					1.751	29.391	0.0312329	4.47468					43.023	7.223	0.751263	1.42557					1.064	56.684	0.0185795	11.1874					87.221	4.256	1.77334	0.783742					3.75	53.822	0.0762433	9.91132
			61.018	5.767	1.08839	0.878006					6.461	19.992	0.115246	3.04371					52.862	7.961	0.923071	1.57122					1.68	36.951	0.029336	7.29282					70.673	3.751	1.43689	0.690746					2.279	46.491	0.0463356	8.56131
			60.282	3.97	1.07526	0.604419					1.915	19.591	0.0341582	2.98266					56.305	7.809	0.983192	1.54122					1.527	41.539	0.0266643	8.19833					90.578	4.941	1.84159	0.909885					1.834	38.911	0.0372881	7.16546
			62.006	6.194	1.10601	0.943015					2.092	24.306	0.0373153	3.70051					51.486	6.736	0.899043	1.32945					1.588	40.788	0.0277295	8.05011					87.723	4.142	1.78354	0.762749					0.882	35.454	0.0179324	6.52885
			64.654	3.993	1.15324	0.607921					1.494	30.095	0.0266487	4.58186					43.38	8.066	0.757497	1.59194					1.518	38.148	0.0265072	7.52907					82.418	3.426	1.67569	0.630898					1.606	7.686	0.0326525	1.41538
			65.066	4.346	1.16059	0.661664					3.887	22.903	0.069333	3.4869					58.257	7.548	1.01728	1.48971					0.76	23.904	0.013271	4.71781					88.479	3.787	1.79892	0.697376					0.98	33.613	0.0199249	6.18983
			66.537	4.65	1.18683	0.707947					2.857	26.135	0.0509608	3.97896					53.89	7.985	0.941022	1.57596					27.278	1.24	0.476326	0.244732					87.525	4.652	1.77952	0.856666					0.914	2.655	0.018583	0.488918
			51.02	3.939	0.910052	0.599699					4.89	19.087	0.0872237	2.90593					59.933	7.76	1.04654	1.53155					36.708	1.569	0.640991	0.309665					119.619	9.458	2.43204	1.74169					31.115	0.793	0.632616	0.146031
			71.469	5.07	1.2748	0.77189					4.704	17.013	0.083906	2.59017					45.065	7.962	0.78692	1.57142					34.978	1.532	0.610782	0.302363					71.108	3.555	1.44574	0.654653					34.128	0.762	0.693875	0.140322
			56.187	4.163	1.00222	0.633802					2.284	22.961	0.0407401	3.49573					38.12	7.274	0.665648	1.43563					0.596	17.223	0.0104073	3.39921					127.537	6.735	2.59302	1.24025					33.116	0.671	0.6733	0.123565
			62.79	4.656	1.12	0.70886					3.965	23.006	0.0707243	3.50258					38.749	7.062	0.676631	1.39379					2.824	48.694	0.0493124	9.61048					76.467	3.857	1.55469	0.710266					12.466	18.202	0.253453	3.3519
			64.406	5.678	1.14882	0.864456					2.109	22.51	0.0376186	3.42707					61.064	8.528	1.06629	1.68313					26.424	1.007	0.461413	0.198746					68.951	4.385	1.40188	0.807497					3.254	30.869	0.0661589	5.68452
			69.93	7.486	1.24735	1.13972					4.675	12.763	0.0833887	1.94312					44.961	8.055	0.785104	1.58977					0.912	57.806	0.0159253	11.4089					87.266	4.091	1.77425	0.753357					2.159	44.651	0.0438958	8.22248
			67.716	5.096	1.20786	0.775849					7.578	16.272	0.13517	2.47736					37.749	8.025	0.659169	1.58385					23.594	0.979	0.411996	0.19322					92.606	4.139	1.88282	0.762197					27.517	0.709	0.559463	0.130562
			51.517	4.372	0.918917	0.665622					1.725	19.185	0.0307691	2.92085					55.995	6.956	0.977779	1.37287					33.627	1.21	0.587191	0.238811					59.256	4.804	1.20477	0.884656					2.146	48.969	0.0436315	9.01764
			53.215	4.808	0.949204	0.732002					6.083	12.95	0.108503	1.97159					52.445	8.068	0.915789	1.59234					25.37	1.083	0.443008	0.213746					91.025	4.193	1.85068	0.772141					4.277	0.412	0.086958	0.0758698
			62.598	6.52	1.11657	0.992648					5.223	19.704	0.0931635	2.99987					63.957	7.177	1.11681	1.41649					2.022	51.204	0.035308	10.1059					114.834	5.142	2.33475	0.946899					7.171	0.909	0.145798	0.167392
			45.601	3.462	0.813392	0.527078					2.562	15.596	0.0456988	2.37444					46.228	7.123	0.807229	1.40583					0.545	24.38	0.00951673	4.81175					73.919	3.932	1.50289	0.724078					0.832	33.57	0.0169159	6.18191
			64.12	3.967	1.14372	0.603962					2.084	20.065	0.0371726	3.05483					53.258	7.513	0.929986	1.4828					1.041	22.694	0.0181778	4.47899					77.236	4.223	1.57033	0.777665					1.865	36.583	0.0379183	6.73676
			64.758	4.97	1.1551	0.756665					1.344	13.015	0.0239731	1.98149					38.136	5.823	0.665927	1.14925					0.525	29.767	0.0091675	5.87495					74.155	4.416	1.50769	0.813206					25.221	2.872	0.512782	0.528879
			53.224	4.328	0.949365	0.658923					0.25	0.459	0.00445929	0.0698812					45.046	6.909	0.786589	1.36359					21.158	1.001	0.369459	0.197562					92.39	4.06	1.87843	0.747649					3.772	51.678	0.0766906	9.5165
			0.434	2.209	0.00774133	0.336313					2.855	11.897	0.0509251	1.81128					51.541	8.069	0.900004	1.59254					19.633	1.033	0.342829	0.203878					99.148	3.811	2.01583	0.701795					39.285	2.639	0.798725	0.485972
			60.428	7.209	1.07786	1.09755					3.596	12.576	0.0641424	1.91465					52.663	7.107	0.919596	1.40267					1.238	40.876	0.0216178	8.06748					70.674	3.724	1.43691	0.685774					1.727	38.397	0.0351126	7.07081
			53.87	6.418	0.960888	0.977119					2.829	18.964	0.0504613	2.8872					48.067	8.509	0.839341	1.67938					1.745	47.044	0.030471	9.28482					80.985	4.124	1.64655	0.759434					0.841	33.803	0.0170988	6.22482
			54.53	5.334	0.97266	0.812083					2.17	17.362	0.0387066	2.64331					57.301	7.168	1.00058	1.41471					2.025	48.578	0.0353603	9.58758					59.043	4.387	1.20044	0.807866					1.71	33.613	0.034767	6.18983
			53.549	6.002	0.955162	0.913784					5.33	26.102	0.095072	3.97394					47.468	8.345	0.828881	1.64701					1.233	55.98	0.0215305	11.0485					108.021	5.405	2.19623	0.99533					31.533	1.944	0.641115	0.357987
			68.458	4.544	1.2211	0.691808					3	10.891	0.0535115	1.65812					39.522	8.765	0.690129	1.7299					0.354	1	0.00618151	0.197365					93.303	3.839	1.89699	0.706952					0.662	30.067	0.0134595	5.53684
			65.692	5.892	1.17176	0.897037					9.12	18.656	0.162675	2.84031					58.351	6.942	1.01892	1.37011					19.155	0.788	0.334483	0.155523					87.798	4.617	1.78507	0.85022					0.99	31.737	0.0201282	5.84437
			63.208	5.757	1.12745	0.876484					6.716	15.815	0.119794	2.40778					46.452	6.35	0.81114	1.25327					0.734	42.731	0.012817	8.43359					63.959	3.348	1.30039	0.616534					0.849	35.169	0.0172615	6.47637
			53.365	4.176	0.95188	0.635782					2.208	33.036	0.0393844	5.02962					66.644	6.535	1.16373	1.28978					0.862	45.668	0.0150522	9.01325					88.215	4.28	1.79355	0.788162					39.041	2.293	0.793764	0.422256
			55.824	6.042	0.995741	0.919874					4.706	36.181	0.0839417	5.50843					38.947	7.529	0.680089	1.48596					1.025	50.003	0.0178984	9.86883					87.447	4.708	1.77793	0.866978					0.797	2.511	0.0162042	0.4624
			57.775	3.988	1.03054	0.607159					2.959	46.588	0.0527801	7.09286					47.553	6.481	0.830366	1.27912					0.517	22.874	0.0090278	4.51452					114.443	5.995	2.3268	1.10398					1.629	29.107	0.0331201	5.36005
			50.808	4.217	0.90627	0.642024					2.748	38.859	0.0490165	5.91615					34.971	7.59	0.61066	1.498					1.545	48.929	0.0269786	9.65686					96.001	7.354	1.95185	1.35424					0.959	26.844	0.019498	4.94332
			47.455	4.087	0.846462	0.622232					5.104	25.562	0.0910408	3.89173					44.2	7.66	0.771816	1.51181					0.914	46.9	0.0159602	9.2564					108.753	6.236	2.21112	1.14836					34.377	1.68	0.698938	0.309372
			46.38	3.564	0.827287	0.542607					3.486	35.448	0.0621803	5.39684					67.276	7.182	1.17477	1.41747					18.176	1.177	0.317387	0.232298					72.218	3.954	1.4683	0.728129					36.598	2.29	0.744094	0.421703
			56.067	5.923	1.00008	0.901756					2.262	38.368	0.0403476	5.8414					52.752	6.18	0.92115	1.21971					0.877	34.551	0.0153141	6.81915					97.238	5.408	1.977	0.995883					1.975	41.854	0.0401548	7.70741
			51.021	3.592	0.91007	0.54687					5.496	29.797	0.098033	4.53649					47.778	8.72	0.834295	1.72102					1.031	53.738	0.0180032	10.606					90.352	4.161	1.837	0.766248					22.888	2.239	0.465349	0.412312
			45.07	6.135	0.803921	0.934033					2.456	38.926	0.0438081	5.92635					45.978	7.677	0.802863	1.51517					19.077	1.485	0.333121	0.293087					99.633	5.358	2.02569	0.986675					1.989	49.632	0.0404395	9.13973
			70.403	4.358	1.25579	0.663491					9.808	28.833	0.174947	4.38973					48.55	8.789	0.847775	1.73464					0.771	46.15	0.0134631	9.10838					93.127	4.212	1.89342	0.77564					1.97	41.445	0.0400532	7.63209
			63.001	4.601	1.12376	0.700486					4.284	28.229	0.0764144	4.29777					31.29	6.551	0.546383	1.29294					0.894	35.286	0.0156109	6.96421					81.711	3.667	1.66131	0.675278					2.596	47.155	0.0527807	8.68359
			63.066	4.263	1.12492	0.649027					0.321	0.82	0.00572573	0.124842					50.951	6.933	0.889701	1.36833					12.497	1.246	0.218221	0.245916					89.674	4.053	1.82321	0.74636					44.646	1.969	0.907722	0.362591
			47.374	3.466	0.845017	0.527687					2.54	26.276	0.0453064	4.00043					49.248	6.137	0.859964	1.21123					0.873	39.314	0.0152442	7.7592					86.01	3.901	1.74872	0.718369					2.034	45.415	0.0413544	8.36317
			59.919	3.724	1.06878	0.566966					4.767	34.225	0.0850297	5.21064					1.38	2.636	0.0240974	0.520253					42.744	1.493	0.746391	0.294665					95.181	4.284	1.93518	0.788898					9.507	24.836	0.193292	4.57355
			47.405	4.953	0.84557	0.754077					1.867	28.099	0.033302	4.27798					36.269	5.899	0.633326	1.16425					0.806	24.062	0.0140743	4.74899					91.039	3.942	1.85096	0.725919					2.689	13.683	0.0546715	2.51972
			46.951	3.699	0.837472	0.56316					7.205	26.994	0.128517	4.10974					54.997	6.383	0.960352	1.25978					1.437	47.586	0.0250927	9.3918					78.374	3.838	1.59346	0.706767					1.316	37.425	0.0267563	6.89181
			54.782	5.94	0.977155	0.904345					3.371	35.88	0.0601291	5.46261					50.64	7.456	0.884271	1.47155					0.605	16.544	0.0105644	3.2652					78.346	3.784	1.5929	0.696823					1.288	52.763	0.026187	9.7163
			61.024	4.454	1.08849	0.678106					9.092	27.56	0.162175	4.19592					53.856	7.695	0.940428	1.51872					1.376	31.71	0.0240276	6.25843					102.707	6.285	2.08819	1.15738					1.313	42.799	0.0266953	7.88143
			53.835	3.686	0.960263	0.561181					2.916	24.949	0.0520131	3.7984					43.201	5.602	0.754371	1.10564					19.515	1.375	0.340769	0.271376					88.27	4.165	1.79467	0.766984					23.476	0.757	0.477303	0.139402
			48.31	4.067	0.861713	0.619187					3.788	28.343	0.0675672	4.31512					18.707	4.399	0.32666	0.868207					1.015	21.645	0.0177238	4.27196					111.546	5.237	2.2679	0.964393					8.748	24.692	0.17786	4.54703
			61.866	4.086	1.10351	0.622079					2.818	15.749	0.0502651	2.39773					46.618	7.795	0.814039	1.53846					0.907	25.974	0.0158379	5.12635					92.052	4.213	1.87156	0.775824					24.277	0.676	0.493589	0.124485
			52.408	3.898	0.93481	0.593457					4.11	31.418	0.0733107	4.78328					68.777	6.558	1.20098	1.29432					0.477	6.997	0.00832933	1.38096					91.935	4.489	1.86918	0.826649					1.157	34.834	0.0235236	6.41468
			51.023	5.674	0.910105	0.863847					1.703	12.121	0.0303767	1.84538					45.915	6.124	0.801763	1.20866					1.336	39.756	0.0233291	7.84643					73.3	4.003	1.4903	0.737152					19.753	0.795	0.401609	0.146399
			54.393	3.94	0.970216	0.599851					3.301	21.94	0.0588805	3.34029					43.884	6.295	0.766298	1.24241					29.27	1.471	0.51111	0.290323					96.771	5.423	1.9675	0.998645					2.564	50.427	0.0521301	9.28613
			50.245	3.803	0.896228	0.578994					9.987	30.182	0.17814	4.59511					22.366	7.817	0.390553	1.5428					1.387	43.099	0.0242197	8.50622					86.43	4.01	1.75726	0.738441					0.564	8.676	0.011467	1.59768
			54.93	4.017	0.979795	0.611574					1.934	14.425	0.0344971	2.19616					36.126	6.902	0.630829	1.36221					0.727	23.22	0.0126948	4.58281					112.65	7.859	2.29035	1.44723					1.766	40.53	0.0359055	7.4636
			52.994	3.587	0.945262	0.546108					1.897	29.07	0.0338371	4.42581					50.929	5.685	0.889317	1.12202					0.838	20.798	0.0146331	4.10479					98.384	4.005	2.0003	0.737521					2.244	48.022	0.045624	8.84325
			60.833	3.412	1.08509	0.519465					5.267	27.58	0.0939483	4.19896					37.58	8.087	0.656218	1.59609					1.032	26.28	0.0180207	5.18674					101.541	5.427	2.06449	0.999382					2.625	35.182	0.0533703	6.47876
			39.287	2.52	0.700768	0.383661					4.98	33.552	0.088829	5.10818					41.227	8.135	0.719902	1.60556					2.63	53.457	0.0459248	10.5505					96.137	4.484	1.95461	0.825728					2.567	32.139	0.0521911	5.91839
			56.69	4.794	1.01119	0.72987					2.74	33.236	0.0488738	5.06007					41.633	5.724	0.726991	1.12972					0.88	40.095	0.0153665	7.91334					81.285	3.798	1.65265	0.699401					3.272	16.246	0.0665248	2.9917
			54.144	4.302	0.965775	0.654965					0.887	14.522	0.0158216	2.21092					60.868	6.971	1.06287	1.37583					2.415	48.504	0.0421705	9.57298					138.349	8.024	2.81285	1.47762					1.426	62.668	0.0289928	11.5403
			41.585	2.788	0.741758	0.424463					5.329	31.962	0.0950542	4.8661					40.438	6.636	0.706124	1.30971					1.402	63.438	0.0244816	12.5204					99.479	6.213	2.02256	1.14412					5.226	31.382	0.106253	5.77899
			52.956	4.14	0.944584	0.630301					2.212	42.721	0.0394558	6.50413					40.488	6.429	0.706997	1.26886					0.786	40.045	0.0137251	7.90347					123.614	3.844	2.51326	0.707872					5.478	29.895	0.111376	5.50516
			51.103	3.63	0.911532	0.552655					2.848	44.279	0.0508002	6.74133					46.818	4.875	0.817531	0.962153					1.646	43.1	0.0287423	8.50642					61.731	6.437	1.25509	1.18537					1.447	59.111	0.0294198	10.8853
			47.428	4.368	0.845981	0.665013					2.958	35.325	0.0527623	5.37811					53.357	7.471	0.931715	1.47451					0.837	44.569	0.0146156	8.79635					98.949	5.346	2.01179	0.984466					3.052	64.517	0.0620519	11.8808
			39.823	2.847	0.710329	0.433446					2.331	33.336	0.0415784	5.07529					52.027	6.154	0.90849	1.21458					1.702	39.989	0.0297202	7.89242					91.528	4.224	1.86091	0.777849					2.462	55.145	0.0500563	10.1549
			46.769	3.215	0.834226	0.489473					4.958	15.111	0.0884366	2.3006					54.284	7.714	0.947902	1.52247					0.936	45.467	0.0163443	8.97358					95.164	4.814	1.93483	0.886498					1.769	54.39	0.0359665	10.0159
			56.924	3.12	1.01536	0.475009					4.344	24.882	0.0774846	3.7882					33.826	8.119	0.590666	1.6024					0.839	37.381	0.0146505	7.37769					116.927	4.879	2.37731	0.898468					5.142	16.493	0.104545	3.03718
			52.704	4.563	0.94009	0.694701					4.136	44.806	0.0737745	6.82156					52.371	6.786	0.914497	1.33932					1.584	43.491	0.0276596	8.58359					112.508	6.007	2.28746	1.10619					3.139	61.031	0.0638207	11.2389
			44.429	3.965	0.792487	0.603658					4.013	26.08	0.0715805	3.97059					62.188	5.111	1.08592	1.00873					0.876	39.282	0.0152966	7.75288					97.637	5.091	1.98511	0.937507					2.445	54.068	0.0497106	9.95662
			57.874	4.781	1.03231	0.727891					2.984	28.124	0.0532261	4.28178					54.773	3.623	0.956441	0.715052					0.905	53.603	0.015803	10.5793					88.696	5.078	1.80333	0.935113					2.163	35.227	0.0439771	6.48705
			44.776	4.951	0.798677	0.753773					7.691	33.48	0.137186	5.09722					47.866	7.683	0.835831	1.51635					2.214	25.112	0.0386606	4.95622					106.998	5.269	2.17544	0.970286					1.809	29.533	0.0367798	5.4385
			48.546	3.607	0.865923	0.549153					1.775	27.223	0.031661	4.14461					59.504	5.694	1.03905	1.12379					1.469	20.823	0.0256515	4.10972					100.083	4.988	2.03484	0.91854					2.738	34.509	0.0556678	6.35483
			56.949	3.719	1.01581	0.566205					3.392	33.372	0.0605036	5.08077					54.838	5.657	0.957576	1.11649					2.208	23.59	0.0385559	4.65583					103.127	5.244	2.09673	0.965682					1.316	18.105	0.0267563	3.33403
			43.915	3.361	0.783319	0.511701					2.807	37.58	0.0500689	5.72143					53.389	5.866	0.932273	1.15774					1.393	22.491	0.0243244	4.43893					98.024	4.256	1.99298	0.783742					3.966	24.856	0.0806349	4.57723
			53.967	3.964	0.962618	0.603505					2.818	39.331	0.0502651	5.98801					55.166	4.884	0.963303	0.963929					3.618	81.768	0.0631771	16.1381					90.342	4.471	1.83679	0.823334					1.553	18.437	0.0315749	3.39517
			48.662	3.166	0.867992	0.482013					8.168	28.126	0.145694	4.28209					52.455	5.792	0.915964	1.14314					1.334	20.453	0.0232942	4.0367					106.192	5.809	2.15905	1.06973					2.398	30.206	0.0487551	5.56243
			62.842	5.791	1.12092	0.88166					2.537	17.19	0.0452529	2.61712					57.027	4.938	0.9958	0.974587					7.978	29.919	0.139311	5.90495					93.263	7.13	1.89618	1.31299					1.944	31.301	0.0395245	5.76408
			46.72	2.952	0.833352	0.449432					7.274	33.663	0.129747	5.12508					48.445	4.397	0.845942	0.867813					1.089	51.762	0.019016	10.216					108.389	5.975	2.20372	1.1003					2.295	44.023	0.0466609	8.10683
			47.935	3.106	0.855024	0.472878					2.137	22.339	0.038118	3.40104					52.982	8.15	0.925166	1.60852					1.104	54.447	0.0192779	10.7459					118.223	6.099	2.40366	1.12313					1.802	52.156	0.0366375	9.60452
			46.621	3.136	0.831586	0.477445					1.505	9.943	0.0268449	1.51379					49.778	5.027	0.869218	0.992152					1.118	55.839	0.0195224	11.0206					53.83	8.121	1.09445	1.49548					1.654	45.699	0.0336284	8.41547
			47.372	3.011	0.844982	0.458414					2.798	40.415	0.0499084	6.15305					6.756	1.245	0.117973	0.245719					0.988	49.916	0.0172524	9.85166					50.787	7.905	1.03258	1.45571					3.563	12.622	0.0724413	2.32434
			53.771	3.229	0.959122	0.491604					2.445	19.703	0.0436118	2.99971					49.648	5.275	0.866948	1.0411					1.704	44.518	0.0297551	8.78628					42.705	7.786	0.868259	1.43379					3.966	15.416	0.0806349	2.83886
			52.933	3.667	0.944174	0.558288					5.462	34.586	0.0974266	5.2656					56.963	7.223	0.994682	1.42557					2.313	22.809	0.0403894	4.50169					45.142	8.007	0.917807	1.47449					2.106	41.128	0.0428182	7.57372
			49.325	3.233	0.879818	0.492213					5.893	29.41	0.105114	4.47757					57.095	4.173	0.996987	0.823603					0.967	55.959	0.0168857	11.0443					30.294	7.068	0.615924	1.30157					16.102	0.953	0.327379	0.175495
			47.902	4.128	0.854435	0.628474					15.309	2.68	0.273069	0.408021					61.408	4.671	1.0723	0.92189					0.471	39.81	0.00822455	7.85709					57.141	7.722	1.16177	1.42201					0.66	15.124	0.0134188	2.78508
			44.142	3.147	0.787368	0.47912					5.544	37.798	0.0988892	5.75462					44.521	5.037	0.777421	0.994126					1.724	52.294	0.0301043	10.321					53.422	8.142	1.08615	1.49935					23.133	1.029	0.47033	0.18949
			55.69	5.205	0.993351	0.792443					5.516	15.66	0.0983898	2.38418					45.744	4.261	0.798777	0.840971					2.19	25.695	0.0382416	5.07129					27.532	7.369	0.559768	1.357					6.915	19.523	0.140593	3.59516
			55.454	3.136	0.989142	0.477445					2.293	27.604	0.0409006	4.20261					54.724	4.578	0.955585	0.903536					2.906	21.217	0.0507443	4.18749					30.88	6.773	0.627838	1.24725					0.989	46.426	0.0201079	8.54935
			56.74	3.749	1.01208	0.570772					4.502	19.765	0.0803029	3.00915					49.164	4.079	0.858497	0.805051					0.566	10.114	0.00988343	1.99615					66.954	7.952	1.36128	1.46436					7.927	21.405	0.161168	3.94173
			53.153	3.815	0.948098	0.580821					3.114	23.748	0.0555449	3.61555					52.577	4.44	0.918094	0.876299					4.619	42.523	0.0806565	8.39254					33.281	7.399	0.676654	1.36253					6.169	32.063	0.125425	5.9044
			40.722	2.859	0.726365	0.435273					13.456	1.374	0.240017	0.209187					50.285	6.831	0.878072	1.3482					0.673	26.895	0.0117519	5.30812					54.717	7.634	1.11248	1.4058					0.736	48.225	0.014964	8.88063
			38.389	3.023	0.684751	0.460241					3.469	22.301	0.0618771	3.39525					103.963	7.439	1.81539	1.4682					0.621	35.079	0.0108438	6.92336					21.977	6.847	0.446826	1.26087					2.396	26.809	0.0487144	4.93688
			55.162	3.702	0.983933	0.563617					2.278	25.358	0.040633	3.86067					45.635	5.617	0.796874	1.1086					2.766	55.302	0.0482996	10.9147					31.638	8.125	0.64325	1.49622					0.967	24.448	0.0196606	4.5021
			51.332	4.861	0.915617	0.740071					17.15	2.346	0.305907	0.35717					32.009	4.613	0.558938	0.910443					0.787	46.481	0.0137425	9.17371					31.415	6.881	0.638716	1.26714					25.285	1.231	0.514083	0.226689
			44.972	3.388	0.802173	0.515811					5.153	26.321	0.0919149	4.00728					60.987	4.403	1.06495	0.868997					1.75	23.561	0.0305583	4.65011					32.983	8.43	0.670596	1.55238					2.362	46.603	0.0480231	8.58194
			45.484	4.303	0.811305	0.655117					3.341	31.323	0.0595939	4.76882					45.218	7.12	0.789592	1.40524					0.44	1.114	0.00768324	0.219864					26.063	10.577	0.529901	1.94775					18.231	2.312	0.370665	0.425755
			46.461	3.798	0.828732	0.578232					3.9	18.841	0.0695649	2.86848					47.086	5.035	0.822211	0.993731					5.016	42.807	0.0875889	8.44859					65.674	6.718	1.33525	1.23712					2.145	20.843	0.0436112	3.83824
			52.336	3.588	0.933525	0.546261					4.137	28.509	0.0737923	4.3404					54.862	4.13	0.957995	0.815116					2.378	57.311	0.0415244	11.3112					67.895	6.876	1.38041	1.26621					29.337	1.21	0.596467	0.222821
			42.919	4.097	0.765553	0.623754					2.56	38.971	0.0456631	5.9332					88.845	6.269	1.5514	1.23728					0.837	49.739	0.0146156	9.81672					38.762	7.153	0.788092	1.31722					0.519	0.739	0.0105521	0.136087
			46.55	3.566	0.83032	0.542911					4.945	30.206	0.0882047	4.59876					58.092	4.967	1.0144	0.98031					4.424	17.014	0.0772514	3.35796					2.764	7.216	0.0561964	1.32883					1.76	36.757	0.0357835	6.7688
			48.71	3.998	0.868848	0.608682					10.462	30.76	0.186612	4.6831					30.751	4.254	0.536971	0.839589					5.029	21.274	0.0878159	4.19874					59.717	8.769	1.21414	1.61481					9.445	22.905	0.192031	4.21795
			47.583	3.782	0.848745	0.575797					13.169	2.467	0.234898	0.375592					92.51	7.83	1.6154	1.54537					2.909	44.748	0.0507967	8.83168					45.352	8.563	0.922076	1.57688					2.389	30.127	0.0485721	5.54789
			48.078	4.296	0.857575	0.654051					3.385	22.358	0.0603788	3.40393					45.24	7.078	0.789976	1.39695					1.101	54.044	0.0192255	10.6664					4.317	6.567	0.0877713	1.20931					0.719	36.647	0.0146184	6.74854
			52.814	4.701	0.942052	0.715711					5.023	31.059	0.089596	4.72863					86.807	6.004	1.51581	1.18498					0.995	52.531	0.0173746	10.3678					10.446	6.558	0.212383	1.20766					1.856	28.011	0.0377354	5.15822
			57.748	4.423	1.03006	0.673387					7.065	11.706	0.12602	1.7822					8.781	2.781	0.153333	0.548871					1.379	44.496	0.02408	8.78194					39.112	7.934	0.795208	1.46105					1.502	37.432	0.030538	6.8931
			60.34	4.109	1.07629	0.625581					40.46	0.803	0.721691	0.122254					48.731	5.496	0.850936	1.08472					1.118	55.79	0.0195224	11.011					16.215	8.248	0.329676	1.51887					1.554	32.39	0.0315952	5.96462
			28.074	5.218	0.50076	0.794423					2.976	31.696	0.0530834	4.82561					53.874	5.045	0.940742	0.995705					1.121	50.285	0.0195748	9.92448					2.547	6.72	0.0517845	1.23749					2.588	40.069	0.0526181	7.3787
			49.613	4.085	0.884955	0.621927					15.23	1.195	0.27166	0.181935					47.924	7.321	0.836844	1.44491					1.06	53.243	0.0185096	10.5083					42.502	7.894	0.864132	1.45368					3.595	23.282	0.0730919	4.28738
			64.588	5.818	1.15207	0.885771					4.864	26.533	0.0867599	4.03956					42.901	4.888	0.749133	0.964719					2.962	42.222	0.0517221	8.33313					9.628	8.253	0.195752	1.51979					3.045	21.541	0.0619096	3.96677
			59.335	4.447	1.05837	0.677041					3.306	24.093	0.0589696	3.66808					84.859	7.067	1.4818	1.39478					0.977	19.753	0.0170603	3.89854					60.799	7.151	1.23614	1.31686					2.285	32.594	0.0464576	6.00218
			58.548	5.431	1.04433	0.826851					2.675	18.336	0.0477144	2.79159					48.637	5.341	0.849294	1.05412					3.338	48.317	0.0582878	9.53607					60.244	8.848	1.22485	1.62936					2.491	40.823	0.0506459	7.51755
			19.371	8.249	0.345524	1.25588					5.915	9.626	0.105507	1.46553					79.291	6.377	1.38457	1.25859					1.467	21.323	0.0256166	4.20841					16.15	6.983	0.328355	1.28592					0.796	32.594	0.0161839	6.00218
			68.308	7.625	1.21842	1.16088					8.339	30.671	0.148744	4.66955					71.341	5.167	1.24575	1.01978					0.336	1.905	0.0058672	0.37598					53.439	8.199	1.0865	1.50985					7.236	34.72	0.147119	6.39369
			32.574	8.649	0.581028	1.31678					2.191	21.767	0.0390812	3.31395					58.425	5.905	1.02021	1.16544					1.458	21.313	0.0254594	4.20643					59.232	9.166	1.20428	1.68792					28.737	1.167	0.584268	0.214903
			37.731	8.452	0.673014	1.28679					2.561	26.381	0.045681	4.01642					46.236	8.44	0.807368	1.66576					2.573	11.261	0.0449295	2.22252					61.218	7.907	1.24466	1.45607					2.564	46.744	0.0521301	8.6079
			31.34	9.457	0.559016	1.4398					2.307	20.745	0.0411503	3.15836					53.284	6.104	0.93044	1.20471					1.797	25.908	0.031379	5.11332					38.417	6.941	0.781077	1.27818					20.141	2.447	0.409498	0.450615
			116.72	11.098	2.08195	1.68963					3.63	26.56	0.0647489	4.04367					53.856	5.939	0.940428	1.17215					2.68	10.99	0.0467979	2.16904					60.948	7.999	1.23917	1.47302					31.038	1.204	0.631051	0.221717
			117.884	8.347	2.10272	1.2708					2.819	18.066	0.0502829	2.75049					85.005	4.672	1.48435	0.922088					0.54	8.996	0.00942943	1.77549					54.931	7.278	1.11683	1.34024					0.53	0.696	0.0107757	0.128168
			100.708	7.868	1.79634	1.19788					1.944	30.297	0.0346754	4.61261					50.528	7.554	0.882315	1.49089					1.779	44.764	0.0310647	8.83483					9.205	8.07	0.187152	1.48609					10.462	22.952	0.212709	4.22661
			85.883	8.092	1.53191	1.23198					2.277	12.411	0.0406152	1.88953					47.746	5.279	0.833736	1.04189					1.767	44.9	0.0308552	8.86167					57.024	7.585	1.15939	1.39678					2.518	31.379	0.0511948	5.77844
			98.707	9.675	1.76065	1.47299					3.654	27.595	0.065177	4.20124					79.093	4.867	1.38111	0.960574					0.81	43.708	0.0141441	8.62642					23.828	7.593	0.48446	1.39825					0.748	37.667	0.015208	6.93638
			114.799	9.575	2.04769	1.45776					7.781	17.219	0.138791	2.62153					90.288	6.315	1.5766	1.24636					32.793	3.259	0.572628	0.643212					23.191	7.829	0.471509	1.44171					2.133	30.126	0.0433672	5.5477
			108.699	8.433	1.93888	1.2839					1.268	37.936	0.0226175	5.77563					72.28	4.792	1.26215	0.945772					18.085	1.767	0.315798	0.348743					42.742	8.79	0.869011	1.61868					2.489	27.491	0.0506052	5.06247
			111.607	7.888	1.99075	1.20092					1.722	23.298	0.0307156	3.54704					44.349	5.169	0.774418	1.02018					0.318	1.324	0.00555288	0.261311					4.102	1.319	0.0834	0.242894					1.64	33.348	0.0333437	6.14103
			102.071	7.083	1.82066	1.07836					3.11	22.825	0.0554736	3.47503					79.701	4.669	1.39173	0.921496					1.867	48.139	0.0326014	9.50094					77.015	7.519	1.56583	1.38462					2.905	41.27	0.0590632	7.59987
			122.028	8.991	2.17663	1.36885					2.059	26.716	0.0367267	4.06742					57.293	6.638	1.00044	1.31011					1.127	8.092	0.0196796	1.59708					44.961	9.129	0.914127	1.6811					4.008	24.227	0.0814889	4.4614
			105.919	11.147	1.88929	1.69709					4.544	20.442	0.081052	3.11222					54.253	6.249	0.94736	1.23333					3.865	39.525	0.0674902	7.80084					52.476	7.778	1.06692	1.43232					3.736	23.645	0.0759587	4.35423
			101.735	7.656	1.81466	1.1656					11.468	7.206	0.204557	1.09709					76.292	4.106	1.3322	0.810379					0.605	19.435	0.0105644	3.83578					4.863	2.887	0.0988723	0.531641					2.551	39.373	0.0518658	7.25054
			91.58	9.082	1.63353	1.3827					7.83	10.672	0.139665	1.62478					30.896	6.846	0.539503	1.35116					17.074	1.772	0.298144	0.34973					50.202	7.578	1.02068	1.39549					2.304	30.5	0.0468439	5.61657
			100.321	6.624	1.78944	1.00848					5.772	18.735	0.102956	2.85234					45.269	6.776	0.790483	1.33734					0.944	1.895	0.016484	0.374006					11.24	8.585	0.228527	1.58093					0.723	31.692	0.0146997	5.83608
			109.884	9.107	1.96002	1.38651					3.102	31.112	0.0553309	4.7367					78.749	7.182	1.37511	1.41747					0.582	17.137	0.0101628	3.38224					25.655	8.117	0.521606	1.49475					7.969	19.308	0.162022	3.55557
			109.168	6.515	1.94725	0.991886					3.412	28.704	0.0608604	4.37009					49.212	7.474	0.859335	1.4751					1.28	11.498	0.0223512	2.2693					39.397	7.069	0.801002	1.30176					2.356	39.503	0.0479011	7.27447
			113.208	7.488	2.01931	1.14002					8.301	13.647	0.148066	2.07771					79.365	5.63	1.38586	1.11116					4.245	2.041	0.0741258	0.402821					4.841	2.24	0.098425	0.412496					2.404	50.039	0.048877	9.21468
			14.497	5.373	0.258585	0.818021					3.137	19.052	0.0559552	2.9006					32.078	8.65	0.560143	1.7072					3.756	63.566	0.0655869	12.5457					56.248	7.195	1.14361	1.32496					3.126	36.385	0.0635564	6.7003
			97.187	11.652	1.73354	1.77398					4.723	19.584	0.0842449	2.9816					78.231	4.916	1.36606	0.970245					3.857	62.822	0.0673505	12.3988					45.091	6.182	0.91677	1.13841					3.521	39.535	0.0715874	7.28037
			110.918	7.124	1.97846	1.0846					5.673	16.719	0.10119	2.54541					33.354	8.722	0.582424	1.72141					0.59	2.043	0.0103025	0.403216					49.253	7.822	1.00139	1.44042					1.325	30.619	0.0269393	5.63849
			99.055	7.677	1.76686	1.1688					0.914	25.428	0.0163032	3.87133					81.988	6.304	1.43167	1.24419					2.092	63.202	0.0365303	12.4738					49.787	7.757	1.01225	1.42845					3.28	51.595	0.0666875	9.50122
			94.252	7.987	1.68119	1.21599					2.04	21.911	0.0363878	3.33587					49.991	7.676	0.872938	1.51497					0.299	3.113	0.00522111	0.614396					34.399	7.149	0.699385	1.31649					1.029	33.888	0.0209212	6.24047
			0.693	3.206	0.0123611	0.488103					4.102	20.573	0.073168	3.13217					80.378	6.818	1.40355	1.34563					2.111	65.308	0.0368621	12.8895					78.384	7.986	1.59367	1.47062					1.36	21.009	0.0276509	3.86881
			111.433	8.949	1.98765	1.36245					3.671	30.338	0.0654802	4.61886					51.477	8.454	0.898886	1.66852					2.108	64.376	0.0368097	12.7055					48.993	8.281	0.996104	1.52495					1.598	24.915	0.0324898	4.5881
			101.044	8.252	1.80234	1.25634					1.18	13.005	0.0210478	1.97997					69.719	4.16	1.21743	0.821037					2.534	35.1	0.0442485	6.9275					26.6	8.212	0.540819	1.51224					1.184	39.17	0.0240726	7.21315
			117.328	7.629	2.0928	1.16149					7.454	12.886	0.132958	1.96185					67.528	5.505	1.17917	1.08649					0.331	1.647	0.00577989	0.32506					25.35	6.48	0.515405	1.19329					1.322	38.223	0.0268783	7.03876
			108.998	6.983	1.94421	1.06314					3.219	30.065	0.0574178	4.57729					84.306	7.462	1.47214	1.47274					0.529	7.763	0.00923734	1.53214					37.036	7.914	0.752999	1.45736					7.712	32.294	0.156797	5.94694
			116.902	10.448	2.0852	1.59067					0.921	16.579	0.016428	2.5241					63.708	4.165	1.11246	0.822024					2.071	64.729	0.0361636	12.7752					38.731	5.962	0.787461	1.0979					1.926	26.849	0.0391586	4.94424
			91.838	6.079	1.63813	0.925507					3.378	16.641	0.0602539	2.53354					74.392	4.847	1.29903	0.956627					0.966	27.859	0.0168682	5.49838					38.318	6.715	0.779064	1.23657					2.335	40.169	0.0474742	7.39712
			90.465	9.082	1.61364	1.3827					0.624	12.319	0.0111304	1.87553					60.072	5.679	1.04897	1.12083					2.718	60.997	0.0474614	12.0387					43.013	7.074	0.874521	1.30268					5.12	21.334	0.104098	3.92865
			109.571	7.623	1.95444	1.16058					3.209	22.168	0.0572394	3.375					65.903	4.086	1.15079	0.806432					1.881	65.101	0.0328458	12.8486					5.886	8.699	0.119672	1.60192					1.175	26.338	0.0238896	4.85014
			1.775	1.501	0.031661	0.228522					1.69	28.439	0.0301448	4.32974					0.353	2.008	0.00616405	0.396308					0.586	9.175	0.0102327	1.81082					32.236	7.562	0.655408	1.39254					3.09	24.868	0.0628245	4.57944
			102.874	7.562	1.83498	1.15129					10.191	13.046	0.181778	1.98621					50.012	7.276	0.873304	1.43603					2.652	33.593	0.046309	6.63007					39.696	7.113	0.807081	1.30986					3.42	30.915	0.0695339	5.693
			104.435	9.507	1.86282	1.44741					3.684	28.268	0.0657121	4.30371					1.192	1.895	0.0208146	0.374006					0.551	8.784	0.00962151	1.73365					1.746	8.179	0.0354989	1.50616					1.062	22.276	0.0215921	4.10212
			76.265	7.498	1.36035	1.14154					2.502	18.413	0.0446286	2.80332					31.803	5.464	0.555341	1.0784					0.629	11.573	0.0109835	2.2841					10.029	8.2	0.203905	1.51003					1.096	24.212	0.0222834	4.45864
			0.863	3.213	0.0153935	0.489168					3.395	12.795	0.0605571	1.94799					35.412	5.242	0.618361	1.03459					2.244	31.171	0.0391845	6.15205					39.261	6.795	0.798237	1.2513					0.266	1.166	0.00540819	0.214719
			97.983	9.64	1.74774	1.46766					7.125	3.866	0.12709	0.588585					40.021	6.716	0.698843	1.3255					1.658	20.373	0.0289518	4.02091					12.839	8.522	0.261037	1.56933					1.242	30.03	0.0252518	5.53002
			102.117	6.587	1.82148	1.00285					1.435	21.66	0.0255963	3.29766					30.614	4.589	0.534579	0.905707					2.353	35.966	0.0410878	7.09842					35.544	6.472	0.722665	1.19182					1.194	11.245	0.0242759	2.07077
			114.741	8.825	2.04665	1.34358					0.295	8.713	0.00526196	1.32652					38.359	6.693	0.669821	1.32096					2.465	37.007	0.0430436	7.30388					28.811	8.391	0.585772	1.5452					3.554	12.681	0.0722583	2.33521
			109.87	9.455	1.95977	1.43949					9.309	9.758	0.166046	1.48562					83.767	8.084	1.46273	1.5955					3.772	13.503	0.0658663	2.66502					48.289	6.742	0.98179	1.24154					7.902	34.797	0.16066	6.40787
			101.526	9.22	1.81094	1.40371					2.24	12.087	0.0399552	1.8402					88.696	7.571	1.5488	1.49425					1.722	55.436	0.0300694	10.9411					71.229	7.894	1.4482	1.45368					8.482	33.628	0.172452	6.19259
			112.233	10.741	2.00192	1.63528					1.45	9.177	0.0258639	1.39717					74.222	6.48	1.29606	1.27892					0.876	37.84	0.0152966	7.46828					37.421	9.351	0.760827	1.72199					0.907	37.155	0.0184407	6.84209
			8.053	8.098	0.143643	1.23289					5.664	18.871	0.10103	2.87305					63.434	5.831	1.10768	1.15083					0.858	38.87	0.0149823	7.67157					24.921	6.24	0.506683	1.1491					2.582	33.389	0.0524961	6.14858
			21.455	2.62	0.382696	0.398886					2.419	13.573	0.0431481	2.06644					97.927	6.112	1.70999	1.20629					12.265	1.181	0.21417	0.233088					38.975	9.052	0.792422	1.66693					1.117	36.28	0.0227103	6.68096
			24.461	8.844	0.436315	1.34647					1.353	39.332	0.0241337	5.98816					83.724	5.897	1.46198	1.16386					14.94	1.097	0.260881	0.216509					31.72	8.824	0.644917	1.62494					0.387	1.113	0.00786831	0.204959
			12.171	6.466	0.217096	0.984426					2.811	29.771	0.0501402	4.53253					86.481	5.245	1.51012	1.03518					0.506	1.164	0.00883572	0.229732					26.865	8.286	0.546207	1.52587					1.469	19.708	0.029867	3.62923
			46.117	9.533	0.822596	1.45137					2.836	19.443	0.0505862	2.96013					81.362	7.98	1.42073	1.57497					2.431	53.321	0.0424499	10.5237					77.103	8.577	1.56762	1.57945					2.659	35.28	0.0540616	6.49681
			53.279	11.049	0.950346	1.68217					4.868	20.901	0.0868313	3.18211					81.84	6.506	1.42908	1.28405					0.798	48.961	0.0139346	9.66317					31.178	8.699	0.633897	1.60192					0.349	1.218	0.00709571	0.224295
			36.538	9.298	0.651734	1.41559					1.168	18.847	0.0208338	2.86939					82.243	5.465	1.43612	1.0786					1.03	43.093	0.0179858	8.50504					0.553	13.853	0.0112433	2.55103					1.228	15.783	0.0249671	2.90644
			59.28	10.514	1.05739	1.60072					1.835	18.741	0.0327312	2.85325					85.255	7.72	1.48871	1.52366					1.032	23.705	0.0180207	4.67853					0.645	9.472	0.0131139	1.74427					0.402	0.612	0.00817328	0.1127
			53.66	8.851	0.957142	1.34753					0.941	17.614	0.0167848	2.68167					65.706	5.604	1.14735	1.10603					0.74	41.397	0.0129218	8.17031					0.651	9.053	0.0132358	1.66711					1.068	37.713	0.0217141	6.94485
			50.34	9.485	0.897922	1.44406					5.219	25.1	0.0930921	3.82139					72.421	4.503	1.26461	0.888733					0.687	21.665	0.0119963	4.27591					20.766	6.31	0.422205	1.16199					1.11	16.077	0.022568	2.96058
			45.464	9.977	0.810949	1.51896					3.216	38.246	0.0573643	5.82282					63.362	6.061	1.10642	1.19623					0.763	37.875	0.0133234	7.47519					29.726	4.889	0.604376	0.900309					2.457	30.56	0.0499546	5.62762
			67.224	10.149	1.19909	1.54515					1.356	22.184	0.0241872	3.37744					74.658	6.065	1.30367	1.19702					0.931	17.354	0.016257	3.42507					57.292	4.078	1.16484	0.750963					1.272	15.038	0.0258617	2.76925
			76.905	10.647	1.37177	1.62097					5.513	25.124	0.0983362	3.82504					78.185	5.166	1.36526	1.01959					0.725	21.901	0.0126599	4.32248					27.625	4.14	0.561659	0.762381					1.066	16.568	0.0216734	3.051
			51.438	9.644	0.917508	1.46827					2.208	27.387	0.0393844	4.16958					68.344	5.73	1.19342	1.1309					1.993	38.027	0.0348016	7.50519					43.595	4.475	0.886354	0.824071					2.997	48.562	0.0609337	8.94269
			74.804	10.273	1.33429	1.56403					5.675	24.738	0.101226	3.76628					74.91	5.618	1.30807	1.10879					0.211	0.8	0.00368446	0.157892					37.321	5.762	0.758794	1.06107					1.087	36.169	0.0221004	6.66052
			82.199	10.74	1.4662	1.63513					1.165	21.548	0.0207803	3.28061					73.079	5.28	1.2761	1.04209					1.002	54.892	0.0174968	10.8337					42.665	4.745	0.867446	0.873791					1.666	34.296	0.0338724	6.31561
			61.36	8.352	1.09449	1.27156					1.738	24.788	0.031001	3.77389					68.789	5.016	1.20119	0.989981					32.558	0.973	0.568524	0.192036					56.763	4.802	1.15408	0.884288					3.318	15.436	0.0674601	2.84254
			66.236	9.066	1.18146	1.38027					5.453	21.644	0.097266	3.29522					67.441	7.247	1.17765	1.4303					1.032	42.181	0.0180207	8.32504					53.285	4.691	1.08337	0.863847					1.153	38.124	0.0234423	7.02053
			77.188	10.001	1.37681	1.52262					13.247	22.62	0.236289	3.44382					67.887	5.437	1.18544	1.07307					1.823	49.128	0.031833	9.69613					56.777	5.566	1.15436	1.02498					1.169	22.388	0.0237676	4.12275
			59.35	8.582	1.05864	1.30658					1.615	27.508	0.028807	4.188					70.085	5.302	1.22382	1.04643					19.754	1.033	0.344942	0.203878					45.362	4.407	0.92228	0.811549					2.731	39.101	0.0555255	7.20045
			73.397	9.63	1.30919	1.46613					10.864	1.752	0.193783	0.266736					76.825	4.714	1.34151	0.930377					5.911	51.58	0.103217	10.1801					55.516	4.786	1.12873	0.881342					0.373	0.784	0.00758367	0.144374
			70.615	7.647	1.25957	1.16423					4.509	37.836	0.0804277	5.7604					58.656	4.709	1.02425	0.92939					0.716	40.902	0.0125027	8.07261					45.222	4.303	0.919433	0.792397					3.189	41.117	0.0648373	7.57169
			46.393	7.437	0.827519	1.13226					2.593	31.026	0.0462517	4.7236					68.342	5.058	1.19338	0.998271					0.782	41.417	0.0136552	8.17425					28.984	3.074	0.58929	0.566077					2.226	17.611	0.045258	3.24306
			73.059	8.454	1.30316	1.28709					4.17	38.094	0.0743809	5.79968					73.649	4.536	1.28605	0.895246					0.933	51.674	0.016292	10.1986					66.047	4.471	1.34284	0.823334					1.501	12.287	0.0305177	2.26265
			47.692	9.149	0.85069	1.3929					5.48	21.181	0.0977476	3.22473					63.65	5.7	1.11145	1.12498					0.744	23.387	0.0129917	4.61577					21.866	5.947	0.44457	1.09514					1.858	21.315	0.037776	3.92516
			61.698	6.804	1.10052	1.03589					3.291	35.072	0.0587021	5.33959					56.697	4.701	0.990037	0.927811					0.827	39.765	0.014441	7.84821					60.909	5.059	1.23837	0.931615					1.091	8.123	0.0221817	1.49585
			57.694	6.804	1.0291	1.03589					14.271	18.479	0.254554	2.81336					67.786	3.991	1.18367	0.787682					0.811	42.611	0.0141616	8.40991					54.342	5.017	1.10486	0.92388					2.384	47.053	0.0484704	8.66481
			61.977	8.988	1.10549	1.36839					1.274	16.01	0.0227245	2.43747					69.364	5.07	1.21123	1.00064					1.698	25.384	0.0296503	5.00991					60.701	5.083	1.23415	0.936034					0.357	0.742	0.00725836	0.136639
			64.163	9.005	1.14449	1.37098					4.895	22.143	0.0873129	3.3712					67.042	6.561	1.17068	1.29491					1.67	21.969	0.0291614	4.3359					55.7	4.523	1.13247	0.83291					0.468	24.389	0.00951517	4.49123
			76.153	7.597	1.35835	1.15662					4.577	31.596	0.0816407	4.81038					68.112	5.1	1.18936	1.00656					0.66	12.428	0.0115249	2.45285					37.843	4.268	0.769407	0.785952					1.418	17.285	0.0288301	3.18303
			66.67	7.221	1.1892	1.09937					5.036	36.128	0.0898279	5.50036					75.973	5.164	1.32663	1.01919					0.437	29.591	0.00763085	5.84022					51.462	4.102	1.0463	0.755383					0.501	22.463	0.0101861	4.13656
			69.948	7.352	1.24767	1.11932					4.442	35.561	0.0792327	5.41404					68.447	5.24	1.19521	1.03419					1.788	24.798	0.0312219	4.89425					42.413	5.02	0.862322	0.924433					1.261	30.465	0.0256381	5.61013
			98.429	9.241	1.75569	1.40691					8.259	43.966	0.147317	6.69367					78.732	4.506	1.37481	0.889325					2.47	1.009	0.0431309	0.199141					39.852	3.635	0.810253	0.669385					4.449	36.018	0.0904551	6.63271
			60.216	7.009	1.07408	1.0671					3.046	25.049	0.054332	3.81362					72.67	5.682	1.26896	1.12143					1.034	37.74	0.0180556	7.44854					56.003	4.217	1.13863	0.77656					7.112	4.427	0.144598	0.815232
			60.785	6.787	1.08423	1.0333					0.804	20.571	0.0143411	3.13186					68.792	5.339	1.20124	1.05373					1.648	29.109	0.0287772	5.74509					61.435	5.259	1.24907	0.968445					0.412	26.387	0.0083766	4.85916
			58.043	6.738	1.03532	1.02584					2.042	27.782	0.0364235	4.22971					63.997	4.067	1.11751	0.802682					0.929	42.632	0.0162221	8.41405					52.53	5.401	1.06802	0.994594					0.918	25.689	0.0186644	4.73063
			84.338	7.884	1.50435	1.20031					0.956	24.491	0.0170523	3.72867					68.972	4.056	1.20438	0.800511					0.375	26.421	0.00654821	5.21457					68.9	4.197	1.40084	0.772877					1.273	30.994	0.0258821	5.70754
			82.995	8.753	1.48039	1.33261					3.22	28.578	0.0574356	4.3509					72.277	5.019	1.26209	0.990573					0.501	8.115	0.00874841	1.60161					60.648	4.062	1.23307	0.748017					1.182	30.461	0.0240319	5.60939
			64.497	8.552	1.15044	1.30201					22.642	23.682	0.403869	3.6055					64.49	6.153	1.12612	1.21438					0.531	36.652	0.00927227	7.23381					48.763	3.863	0.991427	0.711371					2.055	32.853	0.0417813	6.04988
			59.018	6.688	1.05271	1.01823					12.895	3.657	0.23001	0.556766					78.495	5.167	1.37067	1.01978					6.223	50.834	0.108665	10.0328					51.537	4.314	1.04783	0.794423					0.488	1.378	0.0099218	0.253759
			55.166	6.384	0.984005	0.971942					7.643	37.565	0.136329	5.71914					58.476	4.572	1.0211	0.902351					0.491	35.314	0.00857379	6.96974					53.021	4.224	1.078	0.777849					0.963	24.03	0.0195793	4.42512
			59.917	8.926	1.06875	1.35895					3.23	32.875	0.057614	5.00511					69.686	3.821	1.21685	0.75413					1.476	45.004	0.0257738	8.8822					58.36	3.866	1.18655	0.711924					0.792	25.741	0.0161026	4.7402
			70.991	7.458	1.26628	1.13545					1.512	19.494	0.0269698	2.96789					56.972	3.992	0.994839	0.78788					0.967	38.532	0.0168857	7.60486					49.171	4.89	0.999723	0.900493					26.248	4.89	0.533663	0.900493
			70.071	7.653	1.24987	1.16514					1.779	34.712	0.0317323	5.28478					63.624	5.01	1.111	0.988797					5.683	45.603	0.099236	9.00042					28.176	4.143	0.572862	0.762933					30.69	4.182	0.623975	0.770115
			58.2	6.578	1.03812	1.00148					3.859	37.623	0.0688336	5.72797					58.22	6.493	1.01663	1.28149					1.35	53.88	0.0235736	10.634					54.405	5.495	1.10614	1.0119					0.597	1.208	0.0121379	0.222453
			59.826	8.492	1.06713	1.29288					1.926	26.16	0.0343544	3.98277					58.537	4.152	1.02217	0.819458					7.339	1.396	0.128153	0.275521					52.28	4.221	1.06293	0.777297					20.053	3.43	0.407709	0.631634
			60.484	6.545	1.07886	0.996454					10.394	17.34	0.185399	2.63996					54.152	4.646	0.945597	0.916956					1.554	39.739	0.0271358	7.84308					63.961	3.982	1.30043	0.733285					41.972	5.925	0.853356	1.09109
			95.817	7.335	1.7091	1.11673					3.023	17.363	0.0539217	2.64346					55.927	4.049	0.976592	0.79913					1.423	43.941	0.0248483	8.6724					0.346	5.918	0.00703472	1.0898					40.474	4.899	0.822899	0.902151
			61.036	8.689	1.08871	1.32287					10.179	2.292	0.181564	0.348949					72.706	4.175	1.26958	0.823998					0.569	36.43	0.00993582	7.19					44.39	4.311	0.902518	0.79387					20.297	6.511	0.412669	1.199
			94.048	6.553	1.67755	0.997672					2.113	24.951	0.0376899	3.7987					73.478	4.49	1.28307	0.886167					1.077	41.711	0.0188065	8.23228					42.496	3.27	0.86401	0.60217					24.35	3.447	0.495073	0.634765
			73.563	7.286	1.31215	1.10927					1.671	24.624	0.0298059	3.74892					65.384	4.163	1.14173	0.821629					1.172	39.479	0.0204653	7.79176					38.368	3.567	0.780081	0.656863					27.728	5.309	0.563753	0.977652
			63.184	5.511	1.12702	0.839031					0.648	16.79	0.0115585	2.55622					71.526	5.912	1.24898	1.16682					1.011	40.457	0.017654	7.98478					48.039	4.427	0.976707	0.815232					34.618	5.595	0.703838	1.03032
			67.007	5.473	1.19521	0.833245					4.363	40.426	0.0778235	6.15472					60.983	4.484	1.06488	0.884983					0.602	35.042	0.0105121	6.91605					49.573	3.963	1.0079	0.729786					21.436	4.082	0.435827	0.7517
			73.899	7.231	1.31815	1.10089					2.796	30.115	0.0498727	4.58491					61.137	4.055	1.06757	0.800314					0.595	15.568	0.0103898	3.07257					56.521	5.559	1.14916	1.02369					21.277	4.071	0.432594	0.749674
			75.027	6.46	1.33827	0.983513					0.877	14.755	0.0156432	2.2464					44.627	4.684	0.779272	0.924456					1.157	37.486	0.0202034	7.39841					61.882	4.304	1.25816	0.792581					30.483	6.266	0.619767	1.15388
			68.627	5.464	1.22411	0.831875					2.68	38.439	0.0478036	5.85221					66.127	5.096	1.1547	1.00577					0.543	33.375	0.00948181	6.58705					51.69	4.089	1.05094	0.752989					21.804	5.657	0.443309	1.04174
			83.64	5.78	1.4919	0.879985					6.025	28.857	0.107469	4.39338					70.796	6.302	1.23623	1.24379					0.936	25.654	0.0163443	5.06319					36.581	3.316	0.743748	0.610641					24.456	6.339	0.497228	1.16733
			67.303	8.343	1.20049	1.27019					6.165	31.112	0.109966	4.7367					68.698	5.773	1.1996	1.13939					1.113	40.185	0.0194351	7.9311					51.111	4.365	1.03917	0.803814					12.629	5.649	0.256767	1.04026
			79.007	6.018	1.40926	0.91622					7.807	38.85	0.139255	5.91478					59.229	3.137	1.03425	0.619133					1.578	53.699	0.0275549	10.5983					52.024	4.774	1.05773	0.879132					0.682	1.502	0.0138661	0.276593
			70.633	8.443	1.25989	1.28542					1.983	29.934	0.0353711	4.55735					67.249	4.779	1.1743	0.943206					0.501	42.461	0.00874841	8.3803					41.888	5.416	0.851648	0.997356					4.416	2.607	0.0897841	0.480079
			95.229	6.115	1.69861	0.930988					6.581	30.931	0.117386	4.70914					62.195	4.096	1.08604	0.808406					0.487	44.831	0.00850394	8.84806					61.619	4.469	1.25281	0.822966					26.491	5.129	0.538603	0.944505
			62.271	6.053	1.11074	0.921549					7.336	27.341	0.130853	4.16257					54.895	3.496	0.958571	0.689987					1.017	42.226	0.0177588	8.33392					44.293	3.64	0.900545	0.670306					16.869	5.052	0.342973	0.930325
			47.649	9.795	0.849923	1.49126					1.75	26.182	0.031215	3.98612					66.267	6.776	1.15715	1.33734					0.906	38.951	0.0158205	7.68755					52.926	4.274	1.07607	0.787057					30.974	4.804	0.629749	0.884656
			70.904	5.445	1.26473	0.828983					3.974	29.348	0.0708849	4.46813					57.086	3.725	0.99683	0.735183					0.476	41.51	0.00831186	8.19261					43.228	5.138	0.878892	0.946162					31.466	5.649	0.639753	1.04026
			78.397	8.092	1.39838	1.23198					2.957	34.588	0.0527445	5.2659					76.146	6.593	1.32965	1.30123					0.396	13.972	0.00691491	2.75758					55.95	5.494	1.13755	1.01172					24.264	4.117	0.493325	0.758145
			62.652	5.647	1.11753	0.859736					7.741	27.65	0.138077	4.20962					66.9	6.043	1.1682	1.19267					0.434	14.084	0.00757846	2.77968					57.055	4.361	1.16002	0.803078					29.505	5.637	0.599882	1.03805
			57.868	4.783	1.0322	0.728195					6.252	28.837	0.111518	4.39033					63.604	4.39	1.11065	0.866431					1.017	34.355	0.0177588	6.78046					63.495	4.877	1.29095	0.898099					23.069	3.665	0.469029	0.67491
			70.734	6.286	1.26169	0.957022					2.199	22.071	0.0392239	3.36023					58.487	3.609	1.02129	0.712289					2.101	60.461	0.0366874	11.9329					73.667	5.574	1.49776	1.02645					23.494	5.493	0.477669	1.01154
			58.194	4.945	1.03802	0.752859					1.388	9.52	0.024758	1.44939					62.313	4.125	1.0881	0.814129					1.37	36.97	0.0239228	7.29657					47.825	4.443	0.972356	0.818178					29.667	5.153	0.603176	0.948925
			82.226	5.343	1.46668	0.813453					3.131	24.363	0.0558481	3.70918					58.64	5.292	1.02397	1.04445					0.631	20.22	0.0110185	3.99071					47.523	4.758	0.966216	0.876185					0.986	1.434	0.0200469	0.264071
			90.238	8.617	1.60959	1.31191					5.034	47.005	0.0897922	7.15635					65.597	3.702	1.14545	0.730644					0.602	21.335	0.0105121	4.21078					62.708	5.77	1.27495	1.06255					20.918	5.289	0.425295	0.973969
			87.897	7.863	1.56783	1.19711					5.72	34.561	0.102029	5.26179					63.849	5.572	1.11492	1.09972					2.02	58.99	0.035273	11.6425					32.768	5.377	0.666224	0.990174					18.548	5.835	0.37711	1.07451
			87.514	5.466	1.561	0.83218					5.167	14.838	0.0921646	2.25903					61.796	4.455	1.07908	0.87926					1.508	36.329	0.0263325	7.17006					61.042	5.175	1.24108	0.952976					9.658	5.764	0.196362	1.06144
			42.226	8.712	0.753192	1.32637					6.316	14.586	0.112659	2.22067					64.347	4.455	1.12362	0.87926					1.443	38.002	0.0251975	7.50025					45.739	4.633	0.929945	0.853167					22.609	3.035	0.459676	0.558895
			36.543	9.525	0.651823	1.45015					2.103	27.705	0.0375115	4.21799					51.557	3.6	0.900283	0.710513					1.291	38.15	0.0225433	7.52946					46.733	4.014	0.950154	0.739178					35.502	3.945	0.721811	0.726472
			57.13	4.988	1.01904	0.759406					6.875	15.653	0.12263	2.38312					57.67	3.634	1.00703	0.717223					3.382	34.985	0.0590561	6.9048					49.76	4.228	1.0117	0.778586					21.679	2.998	0.440768	0.552082
[truncated: 640 more rows]
[truncated: 6 more columns]

## Sheet: F1FS4H,I
Flourescence intensity analysis of SOX2 and GATA6 in SHEF6 hESCs treated with ACL for 6 days using Fiji
[truncated: 2,639 more rows]

[truncated: 1 more sheets: F1FS4J]
