# Supplementary material for: An in vitro stem cell model of human epiblast and yolk sac interaction
Source: eLife. 2021 Aug 17;10:e63930. doi: 10.7554/eLife.63930 (PMC8370770; doi:10.7554/eLife.63930)
Supplement: Figure 1—source data 1. [file elife-63930-fig1-data1.xlsx]

## Sheet: F1B, C
Fluorescence intensity analysis of SOX2 and SOX17 in RUES2 hEPSCs treated with ACL for 6 days using Fiji
Units = Fluorescence intensity (a.u.)
	Exp 1	Average fluorescence intensity (A.U.)	7.02243	4.7332	1	1		Exp 1	Average fluorescence intensity (A.U.)	3.1039	13.1008	0.441999	2.76786			Exp 2	Average fluorescence intensity (A.U.)	14.9931	3.43995	1	1		Exp 2	Average fluorescence intensity (A.U.)	9.19324	39.5712	0.613163	11.5034			Exp 3	Average fluorescence intensity (A.U.)	38.6421	9.83382	1	1		Exp 3	Average fluorescence intensity (A.U.)	21.161	59.2203	0.547615	6.02211
	Control	Standard Deviation	6.11645	14.0059	0.870987	2.95907		ACL	Standard Deviation	3.23067	23.0183	0.46005	4.86315			Control	Standard Deviation	13.4218	11.1539	0.895197	3.24247		ACL	Standard Deviation	10.687	28.4632	0.712794	8.27431			Control	Standard Deviation	39.3342	23.2965	1.01791	2.36902		ACL	Standard Deviation	25.0185	35.0387	0.647441	3.56308				SOX2
			SOX2	SOX17	rel SOX2	rel SOX17				SOX2	SOX17	rel SOX2	rel SOX17					SOX2	SOX17	rel SOX2	rel SOX17				SOX2	SOX17	rel SOX2	rel SOX17					SOX2	SOX17	rel SOX2	rel SOX17				SOX2	SOX17	rel SOX2	rel SOX17					hEPSC	hEPSC-ACL
			1.553	32.998	0.221149	6.9716				0.357	0.055	0.0508371	0.01162					12.755	90.982	0.850722	26.4486				4.411	32.352	0.294201	9.40479					0.955	0.044	0.024714	0.00447435				12.6	72.333	0.326069	7.35553				Number of values	2736	2270
			0.961	0.047	0.136847	0.00992985				0.174	0.091	0.0247778	0.0192259					1.766	0.115	0.117787	0.0334307				33.208	0.121	2.21488	0.0351749					0.829	0.014	0.0214533	0.00142366				86.265	1.322	2.23241	0.134434
			5.477	0.043	0.77993	0.00908476				0.55	12.664	0.0783205	2.67557					1.822	0.126	0.121522	0.0366284				4.357	28.285	0.290599	8.2225					1.197	0.043	0.0309766	0.00437266				16.987	65.369	0.439598	6.64736				Minimum	0.02145	0.01638
			20.118	0.046	2.86482	0.00971858				0.873	26.608	0.124316	5.62156					2.174	0.181	0.145	0.052617				5.213	44.59	0.347692	12.9624					0.856	0.022	0.022152	0.00223718				18.127	103.399	0.4691	10.5146				25% Percentile	0.3094	0.2282
			11.582	0.052	1.64929	0.0109862				0.72	20.156	0.102529	4.25843					31.503	78.41	2.10116	22.7939				33.806	0.01	2.25476	0.00290702					19.522	0.974	0.5052	0.0990459				12.621	67.426	0.326613	6.85654				Median	0.7289	0.3497
			19.452	0.054	2.76998	0.0114088				0.815	19.922	0.116057	4.20899					19.626	27.201	1.309	7.90738				11.423	108.64	0.761882	31.5818					6.025	0.1	0.155918	0.010169				10.867	60.354	0.281222	6.13739				75% Percentile	1.475	0.5273
			11.128	0.04	1.58464	0.00845094				0.997	30.295	0.141974	6.40053					1.122	0.064	0.0748342	0.0186049				4.769	38.651	0.318079	11.2359					30.792	0.032	0.796851	0.00325408				13.273	76.199	0.343486	7.74867				Maximum	10.47	5.431
			17.635	0.053	2.51124	0.0111975				0.667	22.565	0.0949814	4.76739					2.539	0.026	0.169344	0.00755825				30.147	0.028	2.01072	0.00813965					14.572	0.026	0.377102	0.00264394				15.427	81.03	0.399228	8.23993
			16.293	0.05	2.32014	0.0105637				1.19	34.896	0.169457	7.3726					12.488	0.016	0.832914	0.00465123				33.861	0.02	2.25843	0.00581404					21.438	0.03	0.554784	0.0030507				11.931	66.529	0.308757	6.76532				Mean	1	0.5496
			28.322	0.056	4.03308	0.0118313				0.799	23.26	0.113778	4.91422					7.538	0.014	0.502763	0.00406983				5.423	43.571	0.361699	12.6662					49.551	0.026	1.28231	0.00264394				13.351	76.428	0.345504	7.77195				Std. Deviation	0.9272	0.6406
			6.558	0.068	0.933865	0.0143666				1.59	46.793	0.226417	9.88612					9.326	0.022	0.622018	0.00639544				16.815	1.594	1.12151	0.463379					3.478	0.045	0.0900055	0.00457604				13.121	70.67	0.339552	7.18642				Std. Error of Mean	0.01773	0.01344
			16.747	0.049	2.38479	0.0103524				0.619	14.373	0.0881461	3.03663					8.282	0.022	0.552386	0.00639544				4.462	34.99	0.297603	10.1717					43.191	0.03	1.11772	0.0030507				11.915	69.402	0.308343	7.05748
			3.844	0.047	0.547389	0.00992985				0.154	0.373	0.0219297	0.078805					14.448	0.022	0.96364	0.00639544				3.74	27.126	0.249447	7.88558					16.102	0.035	0.416696	0.00355914				16.974	91.363	0.439262	9.29069				Lower 95% CI of mean	0.9652	0.5233
			10.989	0.048	1.56484	0.0101411				0.989	27.347	0.140834	5.7777					11.692	0.021	0.779823	0.00610474				6.353	50.802	0.423727	14.7682					40.817	0.027	1.05628	0.00274563				16.222	88.687	0.419801	9.01857				Upper 95% CI of mean	1.035	0.576
			5.226	34.452	0.744187	7.27879				0.769	20.429	0.109506	4.31611					10.166	0.018	0.678043	0.00523263				10.218	11.842	0.681511	3.44249					6.652	0.04	0.172144	0.00406759				17.229	77.984	0.445861	7.93018
			18.288	0.051	2.60423	0.0107749				0.86	24.007	0.122465	5.07204					11.437	0.017	0.762815	0.00494193				8.163	65.898	0.544449	19.1567					56.629	0.033	1.46547	0.00335577				11.366	61.245	0.294135	6.228				Sum	2736	1248
			18.76	0.042	2.67144	0.00887349				0.687	14.455	0.0978294	3.05396					9.977	0.022	0.665437	0.00639544				10.679	18.689	0.712259	5.43293					26.457	0.024	0.684668	0.00244056				14.059	81.257	0.363826	8.26301
			11.88	17.085	1.69172	3.60961				0.635	14.85	0.0904246	3.13741					15.745	0.027	1.05015	0.00784895				10.173	100.199	0.67851	29.128					42.302	0.05	1.09471	0.00508449				16.43	97.52	0.425184	9.91679				D'Agostino & Pearson normality test
			6.147	33.785	0.875338	7.13787				0.858	23.194	0.12218	4.90028					13.665	0.038	0.911417	0.0110467				5.713	42.936	0.381041	12.4816					25.787	0.036	0.667329	0.00366083				15.471	87.331	0.400367	8.88068				K2	1175	1495
			22.109	0.043	3.14834	0.00908476				0.576	13.582	0.0820229	2.86952					10.124	0.026	0.675242	0.00755825				7.02	21.165	0.468214	6.1527					50.637	0.045	1.31041	0.00457604				19.05	110.795	0.492986	11.2667				P value	<0.0001	<0.0001
			14	0.047	1.99361	0.00992985				0.644	15.845	0.0917062	3.34763					8.948	0.026	0.596806	0.00755825				5.47	43.383	0.364833	12.6115					26.25	0.019	0.679311	0.00193211				12.202	58.96	0.31577	5.99563				Passed normality test (alpha=0.05)?	No	No
			5.099	30.459	0.726102	6.43518				0.909	22.606	0.129442	4.77605					12.88	0.02	0.859059	0.00581404				9.115	79.174	0.607944	23.016					40.028	0.031	1.03587	0.00315239				12.919	72.583	0.334325	7.38095				P value summary	****	****
			17.672	0.045	2.51651	0.00950731				0.995	26.886	0.141689	5.6803					9.713	0.029	0.647829	0.00843035				5.392	42.194	0.359631	12.2659					24.499	0.015	0.633998	0.00152535				12.766	53.634	0.330365	5.45403
			25.323	0.052	3.60602	0.0109862				0.73	18.37	0.103953	3.88109					12.054	0.021	0.803967	0.00610474				6.298	49.938	0.420059	14.5171					34.02	0.03	0.880387	0.0030507				19.298	77.196	0.499404	7.85005
			19.178	0.048	2.73096	0.0101411				1.105	34.35	0.157353	7.25724					12.857	0.014	0.857525	0.00406983				6.314	9.956	0.421126	2.89423					55.45	0.028	1.43496	0.00284732				9.605	37.029	0.248563	3.76547
			14.741	0.043	2.09913	0.00908476				0.21	0.782	0.0299042	0.165216					11.446	0.022	0.763416	0.00639544				5.87	46.767	0.391512	13.5953					34.001	0.023	0.879896	0.00233887				19.119	108.764	0.494771	11.0602
			19.522	0.045	2.77995	0.00950731				0.802	20.098	0.114206	4.24617					11.211	0.047	0.747742	0.013663				4.738	40.067	0.316011	11.6476					7.932	0.031	0.205268	0.00315239				20.093	114.085	0.519977	11.6013				Column B	hEPSC-ACL
			17.235	0.049	2.45428	0.0103524				0.903	24.691	0.128588	5.21655					8.957	0.027	0.597406	0.00784895				6.397	53.309	0.426662	15.497					17.911	0.03	0.46351	0.0030507				12.935	65.509	0.334739	6.6616				vs.	vs.
			25.55	0.051	3.63834	0.0107749				0.86	24.287	0.122465	5.1312					10.981	0.018	0.732401	0.00523263				4.146	29.85	0.276526	8.67745					33.721	0.027	0.87265	0.00274563				15.725	74.625	0.40694	7.58861				Column A	hEPSC
			16.645	0.049	2.37026	0.0103524				1.76	55.296	0.250626	11.6826					14.433	0.029	0.96264	0.00843035				7.091	62.459	0.472949	18.1569					33.531	0.038	0.867733	0.00386421				21.386	81.538	0.553438	8.29159
			19.184	0.048	2.73182	0.0101411				1.361	43.013	0.193808	9.08751					7.916	0.045	0.527975	0.0130816				9.29	36.294	0.619616	10.5507					38.797	0.033	1.00401	0.00335577				14.857	76.873	0.384477	7.8172				Mann Whitney test
			3.908	56.933	0.556503	12.0284				0.716	21.754	0.101959	4.59604					12.445	0.022	0.830046	0.00639544				19.907	28.015	1.32774	8.14401					36.886	0.036	0.954555	0.00366083				11.822	70.452	0.305936	7.16425				P value	<0.0001
			17.717	0.048	2.52292	0.0101411				0.572	0.728	0.0814533	0.153807					18.58	0.029	1.23923	0.00843035				6.215	51.398	0.414523	14.9415					54.436	0.029	1.40872	0.00294901				11.586	66.523	0.299829	6.76471				Exact or approximate P value?	Approximate
			14.843	0.046	2.11366	0.00971858				1.087	28.856	0.15479	6.09651					16.596	0.019	1.10691	0.00552333				4.024	27.893	0.268389	8.10855					35.059	0.017	0.907275	0.00172873				12.627	68.169	0.326768	6.9321				P value summary	****
			15.074	0.048	2.14655	0.0101411				0.115	0.186	0.0163761	0.0392969					12.765	0.026	0.851389	0.00755825				7.192	59.188	0.479686	17.2061					3.974	0.026	0.102841	0.00264394				12.284	62.919	0.317892	6.39822				Significantly different (P < 0.05)?	Yes
			16.764	0.052	2.38721	0.0109862				0.918	24.942	0.130724	5.26958					15.535	0.026	1.03614	0.00755825				9.564	39.486	0.637892	11.4787					16.032	0.022	0.414884	0.00223718				18.576	96.856	0.480719	9.84927				One- or two-tailed P value?	Two-tailed
			2.631	0.057	0.374657	0.0120426				0.975	22.252	0.138841	4.70126					8.611	0.047	0.574329	0.013663				4.131	27.806	0.275526	8.08326					4.168	0.028	0.107862	0.00284732				13.388	60.098	0.346462	6.11136				Sum of ranks in column A,B	7858894 , 4673627
			19.016	0.048	2.7079	0.0101411				0.788	17.364	0.112212	3.66855					11.073	0.021	0.738538	0.00610474				6.586	53.863	0.439267	15.6581					26.967	0.024	0.697866	0.00244056				12.672	62.414	0.327933	6.34687				Mann-Whitney U	2096042
			15.911	0.048	2.26574	0.0101411				0.62	18.036	0.0882885	3.81053					16.814	0.032	1.12145	0.00930246				6.185	53.503	0.412522	15.5534					10.326	0.04	0.267222	0.00406759				13.117	71.74	0.339449	7.29523
			15.81	0.062	2.25136	0.013099				0.862	25.982	0.12275	5.48931					13.65	0.027	0.910416	0.00784895				22.589	8.123	1.50662	2.36137					30.128	0.057	0.779668	0.00579632				14.642	64.251	0.378913	6.53367				Difference between medians
			2.413	0.06	0.343613	0.0126764				1.005	25.748	0.143113	5.43987					9.123	0.029	0.608478	0.00843035				4.898	42.184	0.326683	12.263					3.314	0.039	0.0857614	0.0039659				20.457	114.186	0.529397	11.6116				Median of column A	0.7289, n=2736
			4.645	31.12	0.661452	6.57483				0.744	24.501	0.105946	5.17641					10.681	0.027	0.712392	0.00784895				5.427	42.796	0.361965	12.4409					2.969	0.038	0.0768333	0.00386421				17.344	81.886	0.448837	8.32698				Median of column B	0.3497, n=2270
			4.232	57.091	0.602641	12.0618				0.587	31.428	0.0835893	6.6399					15.553	0.025	1.03734	0.00726755				5.398	43.59	0.360031	12.6717					5.52	0.034	0.142849	0.00345745				20.344	119.557	0.526473	12.1577				Difference: Actual	-0.3792
			18.515	0.049	2.63655	0.0103524				0.625	39.721	0.0890005	8.39199					8.392	0.02	0.559722	0.00581404				8.821	83.175	0.588336	24.1791					7.317	0.037	0.189353	0.00376252				14.422	75.361	0.37322	7.66345				Difference: Hodges-Lehmann	-0.2905
			4.958	0.043	0.706024	0.00908476				0.767	35.04	0.109221	7.40302					10.178	0.018	0.678844	0.00523263				7.237	61.991	0.482687	18.0209					9.636	0.064	0.249365	0.00650815				12.872	62.43	0.333108	6.3485
			17.561	0.05	2.5007	0.0105637				0.455	22.131	0.0647924	4.67569					14.469	0.027	0.965041	0.00784895				5.76	38.731	0.384176	11.2592					10.427	0.031	0.269835	0.00315239				24.646	87.661	0.637802	8.91423
			12.952	0.046	1.84438	0.00971858				0.804	37.346	0.11449	7.89022					13.942	0.024	0.929892	0.00697684				5.857	54.931	0.390645	15.9685					6.377	0.028	0.165027	0.00284732				14.505	78.275	0.375368	7.95977
			12.594	0.055	1.7934	0.01162				0.465	23.025	0.0662164	4.86457					10.67	0.014	0.711659	0.00406983				5.668	46.573	0.378039	13.5389					7.383	0.038	0.191061	0.00386421				23.357	139.335	0.604445	14.169
			7.64	0.564	1.08794	0.119158				0.528	24.076	0.0751877	5.08662					15.741	0.013	1.04988	0.00377912				5.225	41.585	0.348493	12.0888					6.407	0.024	0.165804	0.00244056				17.677	88.775	0.457455	9.02752
			2.434	0.051	0.346604	0.0107749				0.528	22.358	0.0751877	4.72365					8.817	0.025	0.588069	0.00726755				4.847	38.774	0.323281	11.2717					6.255	0.017	0.16187	0.00172873				12.404	60.236	0.320997	6.12539
			0.423	1.098	0.0602356	0.231978				0.183	0.249	0.0260594	0.0526071					16.101	0.017	1.07389	0.00494193				5.685	52.294	0.379173	15.202					3.8	0.036	0.0983384	0.00366083				30.422	126.668	0.787276	12.8809
			1.795	0.057	0.25561	0.0120426				0.612	32.482	0.0871493	6.86258					18.108	0.031	1.20775	0.00901176				3.951	25.532	0.26352	7.4222					21.112	0.043	0.546347	0.00437266				20.171	97.217	0.521996	9.88598
			2.281	0.06	0.324816	0.0126764				0.579	22.757	0.0824501	4.80795					14.32	0.017	0.955103	0.00494193				6.183	52.216	0.412388	15.1793					12.135	0.025	0.314036	0.00254225				18.603	146.016	0.481418	14.8483
			2.65	0.053	0.377362	0.0111975				0.183	0.227	0.0260594	0.0479591					12.571	0.024	0.83845	0.00697684				5.246	36.909	0.349893	10.7295					12.664	0.024	0.327726	0.00244056				12.995	0.999	0.336291	0.101588
			4.697	0.052	0.668857	0.0109862				0.398	0.788	0.0566755	0.166483					12.158	0.015	0.810904	0.00436053				6.04	41.173	0.402851	11.9691					17.462	0.035	0.451891	0.00355914				4.545	30.834	0.117618	3.1355
			4.78	133.372	0.680676	28.178				0.726	26.344	0.103383	5.56579					10.014	0.021	0.667905	0.00610474				6.375	60.612	0.425194	17.62					9.644	0.026	0.249572	0.00264394				8.929	68.496	0.231069	6.96535
			0.758	0.058	0.10794	0.0122539				0.145	0.205	0.0206481	0.0433111					9.513	0.026	0.63449	0.00755825				8.262	78.941	0.551052	22.9483					17.98	0.031	0.465296	0.00315239				7.339	52.418	0.189922	5.33038
			0.519	0.058	0.0739061	0.0122539				0.49	19.022	0.0697764	4.01884					11.594	0.017	0.773287	0.00494193				5.084	44.091	0.339088	12.8173					5.522	0.035	0.142901	0.00355914				4.207	22.852	0.108871	2.32382
			1.839	0.037	0.261875	0.00781712				0.141	0.171	0.0200785	0.0361278					7.779	0.025	0.518837	0.00726755				6.532	57.815	0.435666	16.8069					25.385	0.036	0.656926	0.00366083				6.718	47.127	0.173852	4.79234
			0.717	0.055	0.102101	0.01162				0.243	0.303	0.0346034	0.0640159					7.224	0.019	0.48182	0.00552333				4.52	30.006	0.301471	8.7228					10.214	0.034	0.264323	0.00345745				3.804	0.336	0.0984419	0.0341678
			2.323	0.05	0.330797	0.0105637				0.779	41.109	0.11093	8.68524					11.871	0.012	0.791762	0.00348842				7.88	73.499	0.525574	21.3663					18.775	0.657	0.485869	0.0668102				6.675	44.59	0.172739	4.53435
			2.601	0.05	0.370385	0.0105637				0.439	20.395	0.062514	4.30892					11.743	0.02	0.783225	0.00581404				4.367	29.34	0.291266	8.52919					27.411	0.059	0.709356	0.0059997				4.405	23.304	0.113995	2.36978
			1.354	0.059	0.192811	0.0124651				0.873	33.116	0.124316	6.99653					13.803	0.015	0.920621	0.00436053				3.575	15.576	0.238442	4.52797					7.233	0.026	0.187179	0.00264394				7.839	62.321	0.202862	6.33741
			0.351	0.058	0.0499827	0.0122539				0.705	36.694	0.100393	7.75247					15.419	0.022	1.0284	0.00639544				5.41	51.152	0.360832	14.87					2.107	0.022	0.054526	0.00223718				3.945	23.547	0.102091	2.39449
			0.436	0.059	0.0620868	0.0124651				0.32	0.194	0.0455683	0.0409871					14.463	0.028	0.964641	0.00813965				5.806	47.324	0.387244	13.7572					21.864	0.034	0.565808	0.00345745				5.071	33.617	0.13123	3.41851
			0.5	0.061	0.0712004	0.0128877				0.199	0.075	0.0283378	0.0158455					14.401	0.023	0.960506	0.00668614				7.788	71.747	0.519437	20.857					17.221	0.058	0.445654	0.00589801				8.558	66.404	0.221468	6.75261
			0.464	1.667	0.066074	0.352193				0.673	22.13	0.0958358	4.67548					6.655	0.012	0.44387	0.00348842				4.177	30.59	0.278594	8.89257					7.85	0.028	0.203146	0.00284732				7.6	21.37	0.196677	2.17311
			0.722	0.075	0.102813	0.0158455				0.633	27.01	0.0901398	5.7065					7.754	0.01	0.51717	0.00290702				3.481	25.774	0.232173	7.49255					3.469	0.029	0.0897726	0.00294901				7.665	58.369	0.198359	5.93554
			10.49	0.081	1.49379	0.0171132				0.182	0.084	0.025917	0.017747					8.175	0.01	0.545249	0.00290702				6.466	58.978	0.431264	17.145					27.684	0.042	0.716421	0.00427097				7.733	35.012	0.200119	3.56037
			2.321	0.069	0.330512	0.0145779				0.616	21.161	0.0877189	4.47076					9.998	0.008	0.666838	0.00232561				4.06	35.522	0.27079	10.3263					8.997	0.027	0.232829	0.00274563				4.753	28.587	0.123001	2.90701
			6.06	0.03	0.862949	0.0063382				0.791	41.79	0.112639	8.82912					4.144	0.059	0.276393	0.0171514				6.192	49.738	0.412989	14.4589					17.779	0.034	0.460094	0.00345745				6.746	46.994	0.174576	4.77881
			4.784	0.025	0.681246	0.00528184				0.629	26.738	0.0895702	5.64903					15.867	0.022	1.05828	0.00639544				5.57	44.247	0.371503	12.8627					16.821	0.032	0.435303	0.00325408				2.737	14.018	0.0708295	1.42549
			1.585	0.036	0.225705	0.00760584				0.625	25.363	0.0890005	5.35853					11.545	0.028	0.770019	0.00813965				5.142	44.406	0.342957	12.9089					1.904	0.178	0.0492727	0.0181008				6.508	49.715	0.168417	5.05551
			0.283	0.027	0.0402994	0.00570438				0.198	0.523	0.0281954	0.110496					11.032	0.022	0.735803	0.00639544				4.698	39.166	0.313343	11.3856					4.398	0.031	0.113814	0.00315239				6.003	42.147	0.155349	4.28592
			3.973	0.023	0.565759	0.00485929				0.569	24.779	0.0810261	5.23515					15.906	0.04	1.06088	0.0116281				5.947	51.622	0.396648	15.0066					3.194	0.051	0.082656	0.00518618				7.293	50.964	0.188732	5.18252
			9.179	0.03	1.3071	0.0063382				0.529	19.777	0.0753301	4.17836					11.413	0.02	0.761215	0.00581404				7.188	50.583	0.479419	14.7046					2.451	0.025	0.0634283	0.00254225				9.705	76.052	0.251151	7.73372
			10.449	0.022	1.48795	0.00464802				0.31	0.098	0.0441443	0.0207048					10.338	0.018	0.689515	0.00523263				6.918	56.822	0.461411	16.5183					29.063	0.307	0.752107	0.0312188				6.655	38.078	0.172222	3.87215
			7.004	0.029	0.997376	0.00612693				0.165	0.543	0.0234961	0.114721					14.213	0.028	0.947967	0.00813965				7.585	68.785	0.505898	19.9959					17.908	0.033	0.463433	0.00335577				10.8	81.226	0.279488	8.25986
			7.585	0.028	1.08011	0.00591566				0.633	22.498	0.0901398	4.75323					13.271	0.017	0.885138	0.00494193				12.305	69.977	0.820708	20.3424					11.793	0.038	0.305185	0.00386421				8.722	67.453	0.225712	6.85929
			6.344	0.027	0.903391	0.00570438				0.67	19.417	0.0954086	4.1023					11.275	0.024	0.75201	0.00697684				4.593	38.697	0.30634	11.2493					1.885	0.135	0.048781	0.0137281				7.485	56.065	0.193701	5.70124
			4.306	0.03	0.613178	0.0063382				0.456	0.271	0.0649348	0.0572551					13.18	0.029	0.879068	0.00843035				7.944	66.063	0.529842	19.2046					11.153	0.048	0.288623	0.00488111				6.005	37.635	0.155401	3.8271
			7.971	0.031	1.13508	0.00654948				0.622	22.418	0.0885733	4.73633					9.282	0.02	0.619083	0.00581404				4.944	28.146	0.329751	8.18209					18.419	0.175	0.476656	0.0177957				10.167	81.186	0.263107	8.25579
			9.66	0.033	1.37559	0.00697202				0.574	21.66	0.0817381	4.57618					9.91	0.013	0.660969	0.00377912				6.528	48.308	0.435399	14.0432					4.561	0.024	0.118032	0.00244056				5.736	42.978	0.148439	4.37043
			0.461	0.036	0.0656468	0.00760584				0.503	20.814	0.0716276	4.39745					8.516	0.023	0.567993	0.00668614				7.548	71.478	0.50343	20.7788					3.93	0.039	0.101703	0.0039659				12.943	120.117	0.334946	12.2147
			10.623	0.035	1.51272	0.00739457				0.18	1.245	0.0256322	0.263035					9.495	0.011	0.633289	0.00319772				7.349	71.414	0.490157	20.7602					6.319	0.03	0.163526	0.0030507				7.162	45.055	0.185342	4.58164
			6.853	0.034	0.975873	0.0071833				0.374	15.093	0.0532579	3.18875					10.174	0.016	0.678577	0.00465123				8.065	48.062	0.537912	13.9717					2.799	0.012	0.072434	0.00122028				4.387	20.574	0.113529	2.09217
			5.829	0.042	0.830055	0.00887349				0.307	0.461	0.0437171	0.0973971					7.753	0.006	0.517103	0.00174421				9.238	22.015	0.616148	6.3998					5.984	0.021	0.154857	0.00213549				12.866	92.665	0.332953	9.42309
			10.163	0.03	1.44722	0.0063382				0.569	19.319	0.0810261	4.08159					3.47	0.008	0.231439	0.00232561				7.827	1.651	0.522039	0.479949					5.861	0.031	0.151674	0.00315239				11.759	87.851	0.304306	8.93356
			10.171	0.033	1.44836	0.00697202				0.677	29.908	0.0964054	6.31877					7.602	0.021	0.507032	0.00610474				6.965	59.907	0.464546	17.4151					21.698	0.412	0.561512	0.0418962				13.056	91.194	0.33787	9.2735
			4.755	0.038	0.677116	0.00802839				0.302	0.169	0.0430051	0.0357052					9.997	0.007	0.666771	0.00203491				6.773	52.391	0.45174	15.2302					17.675	0.028	0.457403	0.00284732				12.4	89.339	0.320894	9.08487
			4.02	0.022	0.572452	0.00464802				1.32	61.82	0.187969	13.0609					11.503	0.008	0.767217	0.00232561				6.101	40.848	0.406919	11.8746					13.03	0.028	0.337197	0.00284732				9.739	70.337	0.252031	7.15256
			6.084	0.027	0.866367	0.00570438				0.618	26.449	0.0880037	5.58797					7.631	0.01	0.508966	0.00290702				6.157	32.568	0.410654	9.46758					27.123	0.088	0.701903	0.00894871				16.757	49.901	0.433646	5.07443
			4.201	0.034	0.598226	0.0071833				0.485	21.242	0.0690644	4.48787					14.696	0.007	0.980181	0.00203491				7.491	60.113	0.499628	17.475					6.435	0.019	0.166528	0.00193211				9.992	53.195	0.258578	5.40939
			1.177	0.032	0.167606	0.00676075				0.677	25.424	0.0964054	5.37142					4.619	0.005	0.308074	0.00145351				1.28	0.125	0.0853723	0.0363377					7.428	0.028	0.192226	0.00284732				7.998	56.057	0.206976	5.70043
			6.633	0.036	0.944545	0.00760584				0.559	26.447	0.0796021	5.58755					22.852	0.007	1.52416	0.00203491				4.105	29.795	0.273792	8.66146					12.19	0.127	0.315459	0.0129146				8.155	55.84	0.211039	5.67836
			8.443	0.032	1.20229	0.00676075				0.261	12.231	0.0371666	2.58409					11.305	0.009	0.754011	0.00261632				4.353	48.476	0.290333	14.0921					2.769	0.025	0.0716576	0.00254225				9.507	65.287	0.246027	6.63903
			4.877	0.035	0.694489	0.00739457				0.353	0.459	0.0502675	0.0969745					11.402	0.004	0.760481	0.00116281				2.621	22.813	0.174813	6.63178					4.782	0.038	0.123751	0.00386421				7.928	52.959	0.205165	5.38539
			7.84	0.038	1.11642	0.00802839				0.728	34.273	0.103668	7.24098					5.523	0.003	0.368368	0.000872105				3.491	34.828	0.23284	10.1246					2.545	0.045	0.0658608	0.00457604				11.903	95.083	0.308032	9.66898
			4.24	0.032	0.60378	0.00676075				0.446	21.52	0.0635108	4.5466					15.185	0.004	1.0128	0.00116281				4.152	45.768	0.276927	13.3048					3.204	0.03	0.0829148	0.0030507				10.81	85.32	0.279747	8.67618
			3.115	0.03	0.443579	0.0063382				0.59	29.915	0.0840165	6.32025					4.959	33.312	0.330751	9.68386				3.808	39.155	0.253983	11.3824					7.837	0.031	0.20281	0.00315239				10.008	55.524	0.258992	5.64623
			3.158	0.031	0.449702	0.00654948				0.609	29.553	0.0867221	6.24376					10.732	0.006	0.715794	0.00174421				6.096	64.755	0.406586	18.8244					4.57	0.041	0.118265	0.00416928				8.237	54.272	0.213161	5.51891
			2.885	0.037	0.410827	0.00781712				0.468	22.969	0.0666436	4.85274					7.356	0.004	0.490624	0.00116281				4.287	46.228	0.285931	13.4386					4.796	0.031	0.124113	0.00315239				8.911	66.22	0.230603	6.7339
			4.556	0.032	0.648778	0.00676075				0.401	18.213	0.0571028	3.84792					10.053	0.005	0.670506	0.00145351				3.577	37.323	0.238576	10.8499					1.704	0.024	0.044097	0.00244056				12.16	64.584	0.314683	6.56754
			0.693	0.039	0.0986838	0.00823967				0.554	25.255	0.0788901	5.33571					20.806	0.007	1.3877	0.00203491				2.734	26.552	0.18235	7.71871					2.401	0.032	0.0621343	0.00325408				12.618	59.246	0.326535	6.02472
			3.226	0.028	0.459385	0.00591566				0.634	28.845	0.0902822	6.09418					15.986	0.006	1.06622	0.00174421				4.219	42.583	0.281395	12.379					2.595	0.025	0.0671548	0.00254225				11.356	86.924	0.293876	8.83929
			0.312	0.024	0.0444291	0.00507056				0.53	24.836	0.0754725	5.24719					11.172	0.007	0.745141	0.00203491				2.764	23.057	0.184351	6.70271					6.561	0.035	0.169789	0.00355914				8.181	62.989	0.211712	6.40534
			0.651	0.024	0.092703	0.00507056				0.412	19.505	0.0586692	4.12089					6.541	0.004	0.436266	0.00116281				3.579	31.247	0.238709	9.08356					2.271	0.029	0.0587701	0.00294901				10.111	71.721	0.261658	7.2933
			6.334	0.026	0.901967	0.00549311				0.509	24.666	0.072482	5.21127					6.191	0.007	0.412922	0.00203491				3.311	34.73	0.220834	10.0961					3.781	0.027	0.0978467	0.00274563				10.622	73.906	0.274882	7.51549
			3.872	0.03	0.551376	0.0063382				0.854	12.911	0.12161	2.72775					1.911	0.004	0.127458	0.00116281				19.856	0.021	1.32434	0.00610474					5.542	0.029	0.143419	0.00294901				11.498	74.561	0.297551	7.5821
			0.232	0.03	0.033037	0.0063382				0.65	27.243	0.0925606	5.75572					7.767	24.809	0.518037	7.21202				3.558	37.787	0.237308	10.9847					3.054	0.022	0.079033	0.00223718				10.707	82.353	0.277081	8.37446
			3.13	0.033	0.445715	0.00697202				0.576	26.821	0.0820229	5.66657					12.816	0.006	0.854791	0.00174421				15.69	0.212	1.04648	0.0616288					14.02	0.046	0.362817	0.00467773				11.776	87.456	0.304745	8.89339
			0.343	0.04	0.0488435	0.00845094				0.618	24.643	0.0880037	5.20641					17.651	0.006	1.17727	0.00174421				6.463	73.205	0.431064	21.2808					41.361	0.052	1.07036	0.00528787				15.101	123.891	0.390792	12.5985
			2.117	0.046	0.301463	0.00971858				0.512	24.484	0.0729092	5.17282					4.085	20.842	0.272458	6.05881				3.013	25.887	0.200959	7.5254					3.39	0.071	0.0877282	0.00721998				7.077	52.603	0.183142	5.34919
			4.203	0.048	0.598511	0.0101411				0.874	39.588	0.124458	8.36389					13.346	0.006	0.89014	0.00174421				3.129	29.445	0.208695	8.55972					17.168	0.04	0.444282	0.00406759				12.012	69.992	0.310853	7.11748
			0.402	0.037	0.0572452	0.00781712				0.707	32.544	0.100677	6.87568					10.352	0.008	0.690449	0.00232561				18.81	0.045	1.25457	0.0130816					38.4	0.075	0.993735	0.00762674				8.369	54.175	0.216577	5.50905
			6.137	0.031	0.873914	0.00654948				0.722	32.442	0.102813	6.85413					12.593	0.009	0.839917	0.00261632				4.288	42.99	0.285997	12.4973					10.895	0.097	0.281946	0.00986392				12.451	97.635	0.322213	9.92849
			2.396	0.036	0.341193	0.00760584				0.753	36.264	0.107228	7.66162					5.02	42.062	0.33482	12.2275				2.711	21.855	0.180816	6.35329					71.907	0.075	1.86085	0.00762674				11.186	75.97	0.289477	7.72538
			1.81	0.034	0.257746	0.0071833				0.545	23.261	0.0776085	4.91443					4.201	37.553	0.280195	10.9167				4.908	51.812	0.32735	15.0618					31.401	0.051	0.812611	0.00518618				11.684	77.586	0.302365	7.88971
			6.055	0.034	0.862237	0.0071833				0.751	32.731	0.106943	6.91519					10.598	0.013	0.706856	0.00377912				3.848	27.773	0.256651	8.07366					60.052	0.058	1.55406	0.00589801				14.115	88.17	0.365275	8.96599
			1.264	0.029	0.179995	0.00612693				0.806	46.48	0.114775	9.81999					7.61	69.326	0.507565	20.1532				3.11	36.686	0.207428	10.6647					60.951	0.062	1.57732	0.00630477				12.628	88.532	0.326794	9.00281
			0.296	0.041	0.0421507	0.00866221				2.081	62.171	0.296336	13.1351					4.666	39.341	0.311209	11.4365				2.769	28.554	0.184684	8.3007					39.736	0.038	1.02831	0.00386421				10.133	66.277	0.262227	6.7397
			1.638	0.035	0.233253	0.00739457				1.928	46.797	0.274549	9.88696					4.663	16.819	0.311009	4.88931				3.82	39.128	0.254783	11.3746					42.398	0.045	1.0972	0.00457604				8.921	56.842	0.230862	5.78025
			3.554	0.042	0.506093	0.00887349				2.565	82.207	0.365258	17.3682					5.466	29.978	0.364567	8.71466				4.336	48.67	0.289199	14.1485					23.324	0.076	0.603591	0.00772843				11.247	78.241	0.291056	7.95632
			0.286	0.037	0.0407267	0.00781712				1.784	47	0.254043	9.92985					2.606	18.705	0.173813	5.43758				13.656	0.312	0.910816	0.090699					34.082	0.051	0.881992	0.00518618				9.821	72.837	0.254153	7.40678
			0.487	0.034	0.0693492	0.0071833				1.847	48.483	0.263014	10.2432					1.517	0.01	0.10118	0.00290702				3.278	34.706	0.218633	10.0891					12.512	0.068	0.323792	0.00691491				6.46	39.676	0.167175	4.03465
			1.509	0.045	0.214883	0.00950731				1.307	34.816	0.186118	7.3557					5.711	0.022	0.380907	0.00639544				2.947	26.391	0.196556	7.67191					7.159	0.075	0.185264	0.00762674				10.307	79.233	0.26673	8.05719
			5.35	48.575	0.761845	10.2626				0.369	0.641	0.0525459	0.135426					10.949	28.064	0.730267	8.15826				2.028	0.079	0.135262	0.0229654					35.375	0.056	0.915453	0.00569463				8.584	61.104	0.222141	6.21366
			1.105	0.037	0.157353	0.00781712				1.422	50.851	0.202494	10.7435					3.739	0.013	0.249381	0.00377912				3.336	28.989	0.222502	8.42716					13.334	0.067	0.345064	0.00681322				12.038	94.622	0.311526	9.6221
			1.452	64.366	0.206766	13.5988				1.931	40.867	0.274976	8.63411					4.887	43.157	0.325949	12.5458				2.013	0.057	0.134261	0.01657					13.259	0.074	0.343123	0.00752505				10.032	63.068	0.259613	6.41338
			1.937	16.978	0.275831	3.587				2.14	63.197	0.304738	13.3518					3.238	13.857	0.215965	4.02826				0.98	0.589	0.0653632	0.171223					17.62	0.084	0.45598	0.00854195				8.567	43.189	0.221701	4.39188
			2.732	27.808	0.389039	5.87509				0.472	1.367	0.0672132	0.288811					1.899	0.011	0.126658	0.00319772				16.465	5.696	1.09817	1.65584					27.053	0.052	0.700092	0.00528787				14.42	116.341	0.373168	11.8307
			1.604	54.987	0.228411	11.6173				0.695	0.106	0.0989686	0.022395					2.595	0.011	0.173079	0.00319772				4.3	49.12	0.286798	14.2793					73.046	0.106	1.89032	0.0107791				13.45	39.851	0.348066	4.05244
			2.953	17.634	0.42051	3.7256				0.396	0.114	0.0563907	0.0240852					4.929	42.881	0.32875	12.4656				3.7	39.855	0.246779	11.5859					32.809	0.059	0.849048	0.0059997				11.591	87.47	0.299958	8.89481
			1.218	32.412	0.173444	6.8478				1.911	57.41	0.272128	12.1292					2.994	23.54	0.199691	6.84312				5.455	63.45	0.363833	18.445					8.544	0.053	0.221106	0.00538956				7.626	46.647	0.19735	4.74353
			3.662	14.215	0.521472	3.00325				1.969	49.637	0.280387	10.487					8.486	75.318	0.565992	21.8951				10.155	11.69	0.67731	3.3983					35.553	0.087	0.920059	0.00884702				9.145	48.08	0.236659	4.88925
			3.144	31.482	0.447708	6.65131				2.055	60.942	0.292634	12.8754					2.135	16.57	0.142398	4.81693				2.388	22.325	0.159273	6.48992					14.987	0.042	0.387841	0.00427097				7.47	18.145	0.193313	1.84516
			1.581	84.268	0.225136	17.8036				2.612	81.882	0.371951	17.2995					6.924	66.618	0.461811	19.366				3.971	45.188	0.264854	13.1362					15.31	0.066	0.3962	0.00671153				5.285	23.787	0.136768	2.4189
			2.462	28.627	0.350591	6.04813				1.419	44.411	0.202067	9.38287					3.754	33.873	0.250381	9.84694				2.984	23.592	0.199024	6.85824					14.426	0.04	0.373324	0.00406759				6.204	44.419	0.16055	4.51696
			2.656	14.761	0.378217	3.11861				0.528	0.28	0.0751877	0.0591566					4.685	35.27	0.312476	10.2531				2.251	19.388	0.150135	5.63613					6.78	0.074	0.175456	0.00752505				5.913	42.852	0.15302	4.35761
			3.053	16.721	0.43475	3.5327				1.856	59.59	0.264296	12.5898					3.416	28.551	0.227837	8.29983				2.704	25.695	0.180349	7.46958					29.852	0.032	0.772526	0.00325408				5.801	40.916	0.150121	4.16074
			0.326	0.163	0.0464227	0.0344376				2.227	54.859	0.317127	11.5903					3.871	37.59	0.258185	10.9275				4.29	51.558	0.286131	14.988					26.099	0.055	0.675404	0.00559294				8.187	66.202	0.211867	6.73207
			1.055	0.113	0.150233	0.0238739				1.912	45.945	0.27227	9.70696					4.943	30.739	0.329684	8.93588				16.023	0.511	1.06869	0.148549					18.626	0.057	0.482013	0.00579632				7.805	51.974	0.201982	5.28523
			0.743	0.084	0.105804	0.017747				1.148	32.058	0.163476	6.773					7.344	59.4	0.489824	17.2677				1.585	9.25	0.105715	2.68899					10.029	0.052	0.259536	0.00528787				5.37	25.947	0.138968	2.63855
			0.813	0.102	0.115772	0.0215499				0.768	0.12	0.109364	0.0253528					5.064	51.403	0.337754	14.9429				3.009	29.79	0.200692	8.66001					27.489	0.075	0.711375	0.00762674				5.576	27.656	0.144299	2.81233
			1.548	0.077	0.220437	0.0162681				1.048	0.095	0.149236	0.020071					4.742	44.719	0.316278	12.9999				3.958	43.23	0.263987	12.567					86.189	0.073	2.23044	0.00742336				7.071	58.214	0.182987	5.91977
			2.342	0.081	0.333503	0.0171132				1.544	41.763	0.219867	8.82341					1.04	0.427	0.069365	0.12413				3.265	35.135	0.217766	10.2138					11.927	0.058	0.308653	0.00589801				8.039	52.043	0.208037	5.29225
			0.332	0.077	0.0472771	0.0162681				1.476	43.259	0.210184	9.13948					3.788	33.917	0.252649	9.85973				3.26	34.18	0.217433	9.93619					11.279	0.058	0.291884	0.00589801				5.658	32.842	0.146421	3.3397
			0.308	0.043	0.0438595	0.00908476				1.391	0.22	0.19808	0.0464802					3.768	26.857	0.251315	7.80738				3.158	33.086	0.21063	9.61816					17.167	0.062	0.444257	0.00630477				4.893	17.726	0.126624	1.80255
			5.59	0.044	0.796021	0.00929603				1.669	50.773	0.237667	10.727					4.841	41.446	0.322881	12.0484				3.941	39.438	0.262853	11.4647					54.584	0.081	1.41255	0.00823688				5.374	40.28	0.139071	4.09607
			1.236	0.044	0.176007	0.00929603				2.125	35.952	0.302602	7.5957					5.479	42.888	0.365434	12.4676				5.898	52.943	0.39338	15.3906					7.707	0.063	0.199446	0.00640646				4.669	19.8	0.120827	2.01346
			2.416	0.134	0.344041	0.0283106				2.282	37.415	0.324959	7.9048					4.568	29.074	0.304673	8.45186				3.956	33.849	0.263854	9.83997					17.461	0.111	0.451865	0.0112876				9.872	93.17	0.255473	9.47444
			11.141	0.101	1.58649	0.0213386				2.476	46.823	0.352585	9.89246					45.461	8.2	3.03212	2.38375				12.629	17.173	0.842318	4.99222					18.605	0.061	0.48147	0.00620308				4.775	30.523	0.12357	3.10388
			11.054	0.06	1.5741	0.0126764				2.14	45.868	0.304738	9.69069					65.695	11.343	4.38167	3.29743				6.021	73.777	0.401584	21.4471					58.393	0.067	1.51112	0.00681322				15.534	29.697	0.401997	3.01988
			1.544	0.044	0.219867	0.00929603				1.948	28.018	0.277397	5.91946					68.836	12.854	4.59116	3.73668				5.424	49.023	0.361765	14.2511					23.224	0.062	0.601003	0.00630477				3.879	25.172	0.100383	2.55974
			4.701	0.04	0.669427	0.00845094				1.603	27.004	0.228269	5.70523					46.721	9.749	3.11616	2.83405				2.913	25.171	0.194289	7.31726					64.861	0.062	1.67851	0.00630477				5.034	38.262	0.130272	3.89086
			3.692	0.071	0.525744	0.0150004				1.896	34.119	0.269992	7.20844					8.43	0.055	0.562257	0.0159886				4.714	49.273	0.31441	14.3238					8.541	0.109	0.221028	0.0110842				6.139	44.869	0.158868	4.56272
			5.14	0.111	0.731941	0.0234514				3.339	83.667	0.475477	17.6766					22.863	0.041	1.5249	0.0119188				5.021	51.724	0.334886	15.0363					70.76	0.067	1.83116	0.00681322				3.772	26.425	0.0976138	2.68715
			3.919	0.079	0.558069	0.0166906				2.386	40.918	0.339768	8.64489					30.403	0.032	2.02779	0.00930246				14.251	186.916	0.950501	54.3368					12.96	0.072	0.335386	0.00732167				5.295	32.096	0.137027	3.26384
			4.742	0.043	0.675265	0.00908476				2.207	41.053	0.314279	8.67341					4.41	0.047	0.294134	0.013663				4.577	52.52	0.305273	15.2677					50.446	0.052	1.30547	0.00528787				4.185	30.424	0.108302	3.09381
			9.505	0.05	1.35352	0.0105637				1.893	37.789	0.269565	7.98381					18.726	0.025	1.24897	0.00726755				3.752	29.295	0.250248	8.51611					6.313	0.102	0.163371	0.0103724				4.162	26.21	0.107706	2.66529
			7.212	0.046	1.027	0.00971858				2.586	49.197	0.368249	10.394					15.233	0.074	1.016	0.0215119				7.112	88.116	0.47435	25.6155					60.364	0.044	1.56213	0.00447435				13.69	121.838	0.354277	12.3897
			3.098	0.059	0.441158	0.0124651				2.722	68.261	0.387615	14.4217					27.475	0.054	1.8325	0.0156979				4.142	41.707	0.27626	12.1243					63.66	0.087	1.64743	0.00884702				8.748	72.082	0.226385	7.33001
			10.34	0.088	1.47243	0.0185921				2.201	57.377	0.313424	12.1222					21.571	0.024	1.43872	0.00697684				6.025	66.506	0.40185	19.3334					7.885	0.067	0.204052	0.00681322				4.055	25.587	0.104937	2.60194
			9.857	0.045	1.40365	0.00950731				2.243	52.256	0.319405	11.0403					12.249	0.054	0.816973	0.0156979				7.044	78.656	0.469815	22.8654					89.817	0.086	2.32433	0.00874533				6.656	49.374	0.172247	5.02083
			8.617	0.054	1.22707	0.0114088				2.171	46.551	0.309152	9.83499					23.977	0.058	1.5992	0.0168607				4.416	33.415	0.294535	9.7138					5.168	0.065	0.13374	0.00660984				3.245	15.91	0.0839758	1.61789
			6.151	0.044	0.875908	0.00929603				2.458	61.486	0.350021	12.9904					14.723	0.033	0.981982	0.00959316				3.69	39.531	0.246112	11.4917					2.794	0.066	0.0723046	0.00671153				4.108	29.871	0.106309	3.03758
			1.08	0.059	0.153793	0.0124651				2.207	33.302	0.314279	7.03583					21.512	0.035	1.43479	0.0101746				9.946	120.859	0.66337	35.1339					46.848	0.074	1.21236	0.00752505				5.677	41.47	0.146912	4.21708
			0.28	0.054	0.0398722	0.0114088				3.518	88.027	0.500966	18.5978					12.885	0.049	0.859393	0.0142444				4.415	47.717	0.294468	13.8714					75.115	0.068	1.94387	0.00691491				3.573	24.234	0.092464	2.46435
			0.295	0.043	0.0420083	0.00908476				1.328	68.644	0.189108	14.5027					14.212	0.032	0.9479	0.00930246				3.829	34.254	0.255383	9.9577					44.636	0.058	1.15511	0.00589801				12.582	116.504	0.325604	11.8473
			5.161	0.052	0.734931	0.0109862				1.516	88.087	0.21588	18.6104					21.374	0.033	1.42558	0.00959316				3.829	37.438	0.255383	10.8833					4.878	0.062	0.126235	0.00630477				8.564	61.751	0.221624	6.27945
			0.993	0.053	0.141404	0.0111975				1.869	109.807	0.266147	23.1993					20.938	0.047	1.3965	0.013663				3.775	34.893	0.251782	10.1435					4.576	0.051	0.11842	0.00518618				7.482	58.612	0.193623	5.96025
			10.428	0.069	1.48496	0.0145779				0.723	23.567	0.102956	4.97908					22.111	2.482	1.47474	0.721522				4.754	48.407	0.317078	14.072					6.847	0.057	0.17719	0.00579632				9.671	68.717	0.250271	6.98782
			11.625	0.046	1.65541	0.00971858				1.442	55.642	0.205342	11.7557					11.66	0.047	0.777689	0.013663				3.539	43.009	0.236041	12.5028					62.146	0.075	1.60825	0.00762674				3.171	0.42	0.0820608	0.0427097
			11.864	0.05	1.68944	0.0105637				0.649	21.014	0.0924182	4.4397					7.751	0.015	0.51697	0.00436053				4.703	46.942	0.313677	13.6461					3.742	0.076	0.0968374	0.00772843				84.836	0.045	2.19543	0.00457604
			8.663	0.048	1.23362	0.0101411				1.963	104.047	0.279533	21.9824					27.83	0.049	1.85618	0.0142444				3.639	41.381	0.242711	12.0295					48.271	0.071	1.24918	0.00721998				41.341	0.047	1.06984	0.00477942
			6.099	0.055	0.868503	0.01162				1.416	84.629	0.20164	17.8799					14.899	0.045	0.993721	0.0130816				3.18	29.6	0.212097	8.60477					12.493	0.065	0.3233	0.00660984				43.615	0.044	1.12869	0.00447435
			12.961	0.044	1.84566	0.00929603				1.094	46.19	0.155787	9.75872					23.989	0.051	1.6	0.0148258				5.322	59.97	0.354962	17.4334					55.273	0.078	1.43038	0.00793181				20.178	0.043	0.522177	0.00437266
			1.484	0.065	0.211323	0.0137328				1.282	65.992	0.182558	13.9424					15.334	0.047	1.02273	0.013663				3.482	31.065	0.232239	9.03065					10.792	0.045	0.279281	0.00457604				58.184	0.053	1.50572	0.00538956
			16.605	0.041	2.36457	0.00866221				1.25	65.178	0.178001	13.7704					16.038	0.018	1.06969	0.00523263				4.671	55.352	0.311542	16.0909					12.887	0.056	0.333496	0.00569463				92.994	0.051	2.40655	0.00518618
			12.412	0.041	1.76748	0.00866221				1.449	75.308	0.206339	15.9106					29.434	0.04	1.96316	0.0116281				1.016	0.055	0.0677643	0.0159886					15.406	0.05	0.398684	0.00508449				63.425	0.045	1.64135	0.00457604
			2.828	0.048	0.40271	0.0101411				1.008	47.762	0.14354	10.0908					27.661	0.04	1.84491	0.0116281				5.506	66.977	0.367234	19.4703					10.563	0.043	0.273355	0.00437266				13.421	108.027	0.347316	10.9852
			1.352	0.037	0.192526	0.00781712				1.448	77.119	0.206196	16.2932					6.343	0.01	0.42306	0.00290702				3.318	30.011	0.221301	8.72425					13.023	0.064	0.337016	0.00650815				58.616	0.05	1.5169	0.00508449
			10.955	0.069	1.56	0.0145779				1.986	112.381	0.282808	23.7431					24.44	0.046	1.63008	0.0133723				3.951	40.313	0.26352	11.7191					10.77	0.059	0.278712	0.0059997				23.488	0.039	0.607835	0.0039659
			5.948	0.042	0.847	0.00887349				1.106	55.656	0.157495	11.7586					21.628	0.035	1.44253	0.0101746				4.77	38.05	0.318145	11.0612					48.902	0.067	1.26551	0.00681322				13.075	94.817	0.338362	9.64193
			6.549	0.042	0.932583	0.00887349				1.312	66.3	0.18683	14.0074					9.806	0.023	0.654032	0.00668614				7.431	71.275	0.495626	20.7198					55.34	0.067	1.43212	0.00681322				80.022	0.041	2.07085	0.00416928
			0.322	0.053	0.0458531	0.0111975				0.994	50.581	0.141546	10.6864					32.395	0.043	2.16065	0.0125002				5.776	66.799	0.385243	19.4186					4.829	0.063	0.124967	0.00640646				4.541	18.983	0.117514	1.93038
			11.035	0.127	1.57139	0.0268317				1.3	68.733	0.185121	14.5215					13.295	0.05	0.886739	0.0145351				6.748	69.86	0.450072	20.3084					2.441	0.067	0.0631695	0.00681322				4.664	20.577	0.120697	2.09247
			11.581	0.043	1.64914	0.00908476				1.245	57.236	0.177289	12.0924					15.277	0.597	1.01893	0.173549				5.637	65.283	0.375972	18.9779					67.636	0.094	1.75032	0.00955885				84.404	0.062	2.18425	0.00630477
			7.539	0.049	1.07356	0.0103524				2.266	124.492	0.32268	26.3019					29.052	0.032	1.93769	0.00930246				3.802	22.434	0.253583	6.5216					3.619	0.074	0.0936544	0.00752505				43.6	0.044	1.1283	0.00447435
			4.139	0.03	0.589397	0.0063382				1.401	64.792	0.199504	13.6888					26.963	0.03	1.79836	0.00872105				5.56	77.984	0.370836	22.6701					34.755	0.064	0.899408	0.00650815				20.747	64.017	0.536902	6.50988
			14.826	0.04	2.11124	0.00845094				17.783	37.877	2.53231	8.0024					26.565	0.029	1.77181	0.00843035				4.286	47.327	0.285864	13.758					43.248	0.053	1.11919	0.00538956				41.026	0.133	1.06169	0.0135248
			14.726	0.047	2.097	0.00992985				1.298	73.254	0.184836	15.4766					9.654	0.023	0.643894	0.00668614				7.496	78.99	0.499962	22.9625					42.228	0.087	1.0928	0.00884702				49.039	0.047	1.26906	0.00477942
			0.34	0.049	0.0484163	0.0103524				1.171	55.384	0.166751	11.7012					9.684	0.041	0.645895	0.0119188				6.44	60.603	0.42953	17.6174					3.834	0.067	0.0992182	0.00681322				17.932	142.031	0.464054	14.4431
			14.295	0.045	2.03562	0.00950731				1.691	89.261	0.2408	18.8585					17.911	0.055	1.19461	0.0159886				4.152	36.152	0.276927	10.5095					54.547	0.095	1.4116	0.00966054				15.952	128.709	0.412814	13.0884
			13.45	0.047	1.91529	0.00992985				0.563	9.945	0.0801717	2.10111					16.349	0.133	1.09043	0.0386633				3.144	26.098	0.209696	7.58674					47.403	0.062	1.22672	0.00630477				11.349	83.187	0.293695	8.45927
			12.238	0.051	1.7427	0.0107749				1.849	96.076	0.263299	20.2983					15.143	0.03	1.00999	0.00872105				5.308	53.264	0.354028	15.4839					33.61	0.08	0.869777	0.00813519				28.253	0.047	0.731146	0.00477942
			15.167	0.039	2.15979	0.00823967				0.913	36.767	0.130012	7.76789					19.334	0.029	1.28952	0.00843035				5.948	68.228	0.396715	19.834					3.484	0.064	0.0901608	0.00650815				53.87	43.254	1.39408	4.39849
			6.204	0.049	0.883455	0.0103524				1.214	55.525	0.172875	11.731					19.198	0.059	1.28045	0.0171514				4.723	51.901	0.315011	15.0877					23.039	0.083	0.596215	0.00844026				49.21	0.064	1.27348	0.00650815
			7.335	0.048	1.04451	0.0101411				0.68	0.022	0.0968326	0.00464802					17.086	0.054	1.13959	0.0156979				6.016	62.136	0.40125	18.063					13.835	0.081	0.358029	0.00823688				21.304	142.353	0.551316	14.4759
			3.947	0.08	0.562056	0.0169019				0.857	0.017	0.122038	0.00359165					16.424	0.039	1.09543	0.0113374				4.672	42.047	0.311609	12.2231					4.612	0.053	0.119352	0.00538956				28.626	0.042	0.740799	0.00427097
			0.3	0.045	0.0427203	0.00950731				0.52	18.377	0.0740485	3.88257					28.661	0.032	1.91161	0.00930246				5.913	64.624	0.39438	18.7863					9.568	0.057	0.247606	0.00579632				75.792	0.047	1.96138	0.00477942
			10.712	0.052	1.5254	0.0109862				0.791	0.019	0.112639	0.0040142					23.654	0.026	1.57765	0.00755825				5.038	58.461	0.33602	16.9947					7.616	0.068	0.197091	0.00691491				57.352	0.066	1.48418	0.00671153
			14.151	0.042	2.01511	0.00887349				0.721	0.021	0.102671	0.00443674					12.39	0.029	0.826378	0.00843035				6.431	60.895	0.428929	17.7023					8.56	0.065	0.22152	0.00660984				72.433	0.33	1.87446	0.0335577
			14.096	0.045	2.00728	0.00950731				1.072	0.02	0.152654	0.00422547					10.341	0.028	0.689715	0.00813965				5.486	54.854	0.365901	15.9462					32.948	0.119	0.852645	0.0121011				72.732	0.047	1.8822	0.00477942
			15.54	0.04	2.21291	0.00845094				1.029	47.792	0.146531	10.0972					19.703	0.047	1.31413	0.013663				2.038	16.787	0.135929	4.88001					24.053	0.064	0.622456	0.00650815				13.183	71.44	0.341157	7.26472
			15.565	0.045	2.21647	0.00950731				0.771	0.047	0.109791	0.00992985					31.409	0.055	2.09489	0.0159886				6.773	73.572	0.45174	21.3875					23.169	0.069	0.599579	0.0070166				67.492	0.055	1.74659	0.00559294
			15.855	0.043	2.25777	0.00908476				0.455	0.013	0.0647924	0.00274656					25.822	0.035	1.72225	0.0101746				3.961	35.344	0.264187	10.2746					59.491	0.071	1.53954	0.00721998				9.954	61.83	0.257595	6.28748
			4.976	0.07	0.708587	0.0147891				0.555	0.016	0.0790325	0.00338038					19.692	0.021	1.3134	0.00610474				6.783	80.625	0.452407	23.4378					33.903	0.141	0.877359	0.0143383				16.033	99.81	0.41491	10.1497
			12.836	0.042	1.82786	0.00887349				0.749	0.024	0.106658	0.00507056					29.36	0.038	1.95823	0.0110467				6.574	77.784	0.438467	22.612					32.927	0.096	0.852102	0.00976223				25.427	0.05	0.658013	0.00508449
			0.454	0.051	0.06465	0.0107749				1.05	0.019	0.149521	0.0040142					16.533	0.037	1.1027	0.010756				6.24	60.299	0.41619	17.529					33.681	0.061	0.871614	0.00620308				16.493	108.364	0.426814	11.0195
			17.851	0.048	2.542	0.0101411				0.749	0.017	0.106658	0.00359165					15.213	0.041	1.01466	0.0119188				8.16	109.214	0.544249	31.7487					70.815	4.071	1.83259	0.413979				71.413	0.062	1.84806	0.00630477
			9.678	0.04	1.37816	0.00845094				0.87	0.012	0.123889	0.00253528					24.795	0.029	1.65376	0.00843035				5.09	55.249	0.339488	16.061					29.85	0.058	0.772474	0.00589801				84.945	0.045	2.19825	0.00457604
			0.766	0.05	0.109079	0.0105637				1.773	0.02	0.252477	0.00422547					14.813	0.048	0.987985	0.0139537				4.707	47.457	0.313943	13.7958					21.87	0.058	0.565963	0.00589801				88.307	0.044	2.28525	0.00447435
			0.326	0.049	0.0464227	0.0103524				1.798	0.019	0.256037	0.0040142					26.232	0.031	1.7496	0.00901176				2.143	16.213	0.142932	4.71315					40.379	0.079	1.04495	0.0080335				23.118	170.341	0.59826	17.322
			9.875	0.046	1.40621	0.00971858				0.792	0.02	0.112781	0.00422547					13.217	0.032	0.881536	0.00930246				5.466	62.502	0.364567	18.1694					51.617	0.054	1.33577	0.00549125				57.499	0.056	1.48799	0.00569463
			17.908	0.047	2.55011	0.00992985				1.153	0.015	0.164188	0.0031691					20.189	0.022	1.34655	0.00639544				5.51	55.981	0.367501	16.2738					22.888	0.081	0.592308	0.00823688				9.281	60.799	0.240179	6.18264
			7.323	0.039	1.0428	0.00823967				0.868	0.016	0.123604	0.00338038					18.934	0.047	1.26284	0.013663				3.275	32.595	0.218433	9.47543					40.264	0.137	1.04197	0.0139315				53.871	0.042	1.3941	0.00427097
			5.812	0.083	0.827634	0.0175357				0.917	0.019	0.130582	0.0040142					18.539	0.027	1.2365	0.00784895				5.919	60.109	0.39478	17.4738					63.007	0.125	1.63053	0.0127112				11.094	55.266	0.287096	5.61999
			15.368	0.039	2.18842	0.00823967				1.43	0.016	0.203633	0.00338038					22.045	0.027	1.47034	0.00784895				6.367	72.494	0.424661	21.0741					23.931	0.057	0.619299	0.00579632				66.619	0.05	1.724	0.00508449
			14.167	0.049	2.01739	0.0103524				0.837	0.019	0.11919	0.0040142					21.216	0.029	1.41505	0.00843035				5.027	57.708	0.335287	16.7758					18.219	0.062	0.471481	0.00630477				12.098	53.255	0.313078	5.41549
			0.476	0.057	0.0677828	0.0120426				0.911	0.025	0.129727	0.00528184					15.222	0.053	1.01526	0.0154072				4.138	30.657	0.275993	8.91205					42.522	0.058	1.10041	0.00589801				37.68	0.068	0.975103	0.00691491
			9.932	0.044	1.41433	0.00929603				0.47	0.179	0.0669284	0.0378179					9.466	0.029	0.631355	0.00843035				15.477	21.761	1.03227	6.32596					30.711	0.069	0.794755	0.0070166				9.836	50.97	0.254541	5.18313
			4.086	0.083	0.58185	0.0175357				1.3	0.019	0.185121	0.0040142					6.766	0.017	0.451273	0.00494193				3.31	27.494	0.220768	7.99256					50.211	0.069	1.29939	0.0070166				60.228	0.048	1.55861	0.00488111
			8.928	0.049	1.27136	0.0103524				0.516	0.028	0.0734789	0.00591566					19.721	0.041	1.31533	0.0119188				2.363	13.337	0.157605	3.87709					67.001	0.059	1.73389	0.0059997				11.687	49.331	0.302442	5.01646
			10.695	0.05	1.52298	0.0105637				1.958	0.015	0.278821	0.0031691					18.034	0.039	1.20282	0.0113374				8.548	91.985	0.570127	26.7402					12.374	0.106	0.320221	0.0107791				20.636	106.589	0.534029	10.839
			11.219	0.04	1.5976	0.00845094				0.641	0.02	0.091279	0.00422547					25.748	0.029	1.71732	0.00843035				1.137	0.029	0.0758347	0.00843035					20.88	0.057	0.540344	0.00579632				20.284	118.903	0.52492	12.0912
			13.22	0.045	1.88254	0.00950731				0.821	0.019	0.116911	0.0040142					20.049	0.036	1.33721	0.0104653				5.751	43.95	0.383575	12.7763					22.038	45.716	0.570311	4.64885				18.558	115.768	0.480254	11.7724
			7.748	0.042	1.10332	0.00887349				2.287	0.017	0.325671	0.00359165					10.818	0.032	0.72153	0.00930246				6.076	60.405	0.405252	17.5598					54.118	0.063	1.40049	0.00640646				16.066	75.261	0.415764	7.65328
			7.941	0.046	1.13081	0.00971858				0.915	0.015	0.130297	0.0031691					11.004	0.065	0.733935	0.0188956				4.986	50.458	0.332552	14.6682					62.809	0.086	1.6254	0.00874533				20.607	115.896	0.533279	11.7854
			6.696	0.044	0.953516	0.00929603				1.188	0.024	0.169172	0.00507056					11.476	0.023	0.765416	0.00668614				8.425	94.146	0.561923	27.3684					38.938	0.076	1.00766	0.00772843				8.357	36.568	0.216267	3.71859
			9.636	0.047	1.37217	0.00992985				1.507	0.02	0.214598	0.00422547					24.909	0.021	1.66136	0.00610474				3.32	26.622	0.221435	7.73906					17.792	0.08	0.460431	0.00813519				14.744	79.18	0.381553	8.0518
			0.521	0.037	0.0741909	0.00781712				1.365	0.019	0.194377	0.0040142					10.168	0.03	0.678177	0.00872105				13.333	0.017	0.889273	0.00494193					13.472	0.089	0.348635	0.0090504				23.176	140.622	0.599761	14.2998
			4.342	0.042	0.618305	0.00887349				0.832	0.02	0.118478	0.00422547					15.472	0.037	1.03194	0.010756				11.997	143.77	0.800166	41.7942					26.556	0.422	0.68723	0.0429131				12.688	67.59	0.328347	6.87322
			5.069	0.039	0.72183	0.00823967				0.78	0.015	0.111073	0.0031691					20.081	0.031	1.33935	0.00901176				1.339	0.03	0.0893075	0.00872105					24.302	0.067	0.6289	0.00681322				14.359	70.198	0.37159	7.13842
			2.182	0.044	0.310719	0.00929603				0.931	0.016	0.132575	0.00338038					23.519	0.03	1.56865	0.00872105				5.864	68.552	0.391112	19.9282					51.867	0.06	1.34224	0.00610139				9.613	37.391	0.24877	3.80229
			7.229	0.041	1.02942	0.00866221				1.254	0.016	0.178571	0.00338038					26.843	0.019	1.79035	0.00552333				5.932	58.054	0.395647	16.8764					48.339	0.065	1.25094	0.00660984				14.731	66.7	0.381216	6.78271
			0.697	0.033	0.0992534	0.00697202				0.961	0.025	0.136847	0.00528184					11.904	0.047	0.793963	0.013663				5.217	57.249	0.347959	16.6424					40.288	0.066	1.04259	0.00671153				19.307	110.95	0.499637	11.2825
			2.419	0.093	0.344468	0.0196484				0.834	0.022	0.118762	0.00464802					14.479	0.018	0.965708	0.00523263				7.775	88.102	0.51857	25.6114					14.979	0.051	0.387634	0.00518618				16.12	75.287	0.417162	7.65592
			0.864	0.051	0.123034	0.0107749				1.407	0.021	0.200358	0.00443674					8.827	0.031	0.588736	0.00901176				5.664	68.335	0.377773	19.8651					39.03	0.13	1.01004	0.0132197				17.796	59.271	0.460534	6.02726
			0.344	0.042	0.0489859	0.00887349				0.916	0.028	0.130439	0.00591566					13.594	0.025	0.906681	0.00726755				6.68	81.249	0.445537	23.6192					20.558	0.048	0.532011	0.00488111				16.86	88.143	0.436312	8.96325
			1.227	0.043	0.174726	0.00908476				1.513	0.024	0.215453	0.00507056					31.851	4.165	2.12437	1.21077				6.879	83.889	0.45881	24.3867					38.349	0.062	0.992415	0.00630477				11.746	58.672	0.303969	5.96635
			0.742	0.191	0.105661	0.0403532				0.628	0.024	0.0894278	0.00507056					29.734	0.036	1.98317	0.0104653				5.486	60.765	0.365901	17.6645					23.342	0.072	0.604056	0.00732167				19.93	121.955	0.515759	12.4016
			0.471	0.052	0.0670708	0.0109862				1.776	0.026	0.252904	0.00549311					21.799	0.035	1.45393	0.0101746				10.749	68.782	0.716928	19.9951					78.195	0.09	2.02357	0.00915209				16.244	79.816	0.420371	8.11648
			0.655	0.035	0.0932726	0.00739457				0.811	0.022	0.115487	0.00464802					6.317	0.027	0.421326	0.00784895				2.705	23.245	0.180416	6.75736					26.42	0.124	0.683711	0.0126095				12.202	61.177	0.31577	6.22108
			0.265	0.031	0.0377362	0.00654948				1.557	0.034	0.221718	0.0071833					10.192	0.02	0.679777	0.00581404				5.912	58.713	0.394314	17.068					21.476	0.06	0.555767	0.00610139				18.5	90.342	0.478753	9.18686
			11.13	0.037	1.58492	0.00781712				1.122	0.027	0.159774	0.00570438					11.707	0.031	0.780823	0.00901176				8.124	73.876	0.541848	21.4759					35.426	0.073	0.916772	0.00742336				19.853	118.754	0.513766	12.0761
			3.267	0.045	0.465224	0.00950731				1.04	0.02	0.148097	0.00422547					30.026	0.028	2.00265	0.00813965				7.654	98.071	0.5105	28.5094					43.62	0.16	1.12882	0.0162704				14.085	73.06	0.364499	7.42946
			1.15	0.043	0.163761	0.00908476				1.231	0.028	0.175295	0.00591566					10.737	0.041	0.716127	0.0119188				5.447	62.242	0.363299	18.0939					23.629	0.073	0.611484	0.00742336				14.761	69.275	0.381993	7.04456
			8.043	0.041	1.14533	0.00866221				1.785	0.011	0.254186	0.00232401					12.785	0.032	0.852723	0.00930246				3.078	29.579	0.205294	8.59867					21.852	0.057	0.565497	0.00579632				9.395	51.528	0.243129	5.23987
			2.537	0.044	0.361271	0.00929603				1.658	0.024	0.236101	0.00507056					26.423	0.036	1.76234	0.0104653				8.236	104.485	0.549318	30.374					17.278	0.063	0.447129	0.00640646				6.443	33.446	0.166735	3.40112
			7.06	0.043	1.00535	0.00908476				0.677	0.023	0.0964054	0.00485929					10.992	0.03	0.733135	0.00872105				2.884	28.447	0.192355	8.26959					28.397	0.161	0.734872	0.0163721				4.945	16.136	0.127969	1.64087
			1.131	0.04	0.161055	0.00845094				1.917	0.026	0.272982	0.00549311					14.208	0.046	0.947633	0.0133723				5.673	60.811	0.378373	17.6779					10.046	0.062	0.259976	0.00630477				10.512	64.56	0.272035	6.5651
			8.012	0.048	1.14092	0.0101411				0.702	0.016	0.0999654	0.00338038					14.427	0.031	0.96224	0.00901176				5.238	60.454	0.34936	17.5741					33.173	0.298	0.858468	0.0303036				8.321	51.189	0.215335	5.2054
			7.5	0.043	1.06801	0.00908476				0.888	0.027	0.126452	0.00570438					18.163	0.036	1.21142	0.0104653				8.483	98.696	0.565792	28.6911					27.641	0.052	0.715308	0.00528787				7.93	28.554	0.205217	2.90365
			10.773	0.042	1.53408	0.00887349				2.308	0.022	0.328661	0.00464802					8.052	0.017	0.537045	0.00494193				6.843	70.127	0.456409	20.386					13.377	0.056	0.346177	0.00569463				8.332	43.631	0.21562	4.43683
			0.27	0.038	0.0384482	0.00802839				0.828	0.018	0.117908	0.00380292					7.033	0.034	0.469081	0.00988386				7.03	71.244	0.468881	20.7108					17.983	0.107	0.465373	0.0108808				8.26	46.439	0.213757	4.72238
			1.019	0.044	0.145106	0.00929603				0.784	0.026	0.111642	0.00549311					26.461	0.02	1.76487	0.00581404				7.887	90.358	0.52604	26.2672					3.906	0.105	0.101082	0.0106774				23.709	27.314	0.613554	2.77756
			3.3	0.044	0.469923	0.00929603				0.778	0.025	0.110788	0.00528184					29.366	0.019	1.95863	0.00552333				11.898	0.068	0.793563	0.0197677					28.484	0.125	0.737124	0.0127112				7.166	37.507	0.185445	3.81408
			1.617	0.045	0.230262	0.00950731				0.903	0.022	0.128588	0.00464802					20.334	0.023	1.35622	0.00668614				3.515	36.003	0.23444	10.4661					17.262	0.108	0.446715	0.0109825				4.438	15.146	0.114849	1.54019
			1.786	0.047	0.254328	0.00992985				1.134	0.025	0.161483	0.00528184					12.959	0.021	0.864328	0.00610474				6.036	61.813	0.402584	17.9692					31.186	0.094	0.807048	0.00955885				11.021	73.737	0.285207	7.4983
			2.739	0.05	0.390036	0.0105637				1.264	0.021	0.179995	0.00443674					16.893	0.021	1.12671	0.00610474				6.425	71.036	0.428529	20.6503					24.181	0.132	0.625769	0.0134231				11.864	59.942	0.307023	6.09549
			3.089	0.044	0.439876	0.00929603				0.999	0.021	0.142258	0.00443674					14.927	0.039	0.995588	0.0113374				6.027	61.213	0.401984	17.7947					18.018	0.109	0.466279	0.0110842				9.985	60.508	0.258397	6.15305
			0.413	0.039	0.0588116	0.00823967				1.063	0.015	0.151372	0.0031691					13.728	0.046	0.915618	0.0133723				6.275	64.759	0.418525	18.8256					17.98	0.134	0.465296	0.0136264				9.216	44.083	0.238496	4.48279
			7.15	0.047	1.01817	0.00992985				1.286	0.023	0.183128	0.00485929					9.008	0.052	0.600808	0.0151165				6.606	70.269	0.440601	20.4273					25.165	0.092	0.651233	0.00935547				8.598	53.258	0.222504	5.4158
			1.681	0.049	0.239376	0.0103524				1.212	0.042	0.17259	0.00887349					12.364	0.034	0.824644	0.00988386				5.314	50.667	0.354429	14.729					19.81	0.098	0.512653	0.00996561				11.007	73.877	0.284845	7.51254
			3.876	0.04	0.551946	0.00845094				1.283	0.04	0.1827	0.00845094					7.447	0.025	0.496694	0.00726755				5.012	53.92	0.334286	15.6746					54.034	0.063	1.39832	0.00640646				7.362	37.721	0.190518	3.83584
			7.493	0.043	1.06701	0.00908476				0.75	0.02	0.106801	0.00422547					21.493	0.024	1.43352	0.00697684				5.498	58.376	0.366701	16.97					18.499	0.056	0.478727	0.00569463				8.722	52.202	0.225712	5.30841
			12.016	0.044	1.71109	0.00929603				0.745	0.021	0.106089	0.00443674					13.652	0.043	0.910549	0.0125002				4.764	44.889	0.317745	13.0493					4.899	0.052	0.126779	0.00528787				6.065	31.207	0.156953	3.17344
			10.924	0.048	1.55559	0.0101411				0.611	0.022	0.0870069	0.00464802					8.136	0.014	0.542648	0.00406983				7.056	82.711	0.470615	24.0442					57.588	0.079	1.49029	0.0080335				8.724	52.522	0.225764	5.34095
			3.797	0.04	0.540696	0.00845094				1.561	0.018	0.222288	0.00380292					12.145	0.032	0.810037	0.00930246				2.957	24.539	0.197223	7.13353					26.703	0.093	0.691034	0.00945716				10.507	31.429	0.271906	3.19601
			5.169	0.043	0.73607	0.00908476				1.153	0.018	0.164188	0.00380292					19.1	0.017	1.27392	0.00494193				2.995	29.424	0.199758	8.55361					22.036	0.061	0.570259	0.00620308				11.445	73.455	0.29618	7.46963
			0.601	0.04	0.0855829	0.00845094				0.389	0.015	0.0553939	0.0031691					18.061	0.031	1.20462	0.00901176				2.963	28.852	0.197624	8.38733					45.817	0.075	1.18568	0.00762674				9.119	56.584	0.235986	5.75402
			2.904	0.048	0.413532	0.0101411				1.237	0.019	0.17615	0.0040142					14.543	0.029	0.969977	0.00843035				3.295	29.624	0.219767	8.61175					24.918	0.076	0.644841	0.00772843				12.123	82.643	0.313725	8.40395
			3.04	0.041	0.432899	0.00866221				2.48	0.019	0.353154	0.0040142					5.732	0.025	0.382308	0.00726755				3.923	35.558	0.261653	10.3368					21.277	0.055	0.550617	0.00559294				17.536	36.606	0.453806	3.72246
			7.303	0.043	1.03995	0.00908476				1.653	0.018	0.235389	0.00380292					18.633	0.037	1.24277	0.010756				5.312	52.151	0.354295	15.1604					21.428	0.114	0.554525	0.0115926				8.787	54.011	0.227395	5.49237
			9.856	0.044	1.4035	0.00929603				4.841	0.02	0.689363	0.00422547					2.029	15.546	0.135329	4.51925				6.082	68.899	0.405652	20.0291					3.416	0.085	0.088401	0.00864364				7.157	36.422	0.185213	3.70375
			13.738	0.042	1.9563	0.00887349				1.52	0.013	0.216449	0.00274656					0.789	0.056	0.052624	0.0162793				6.996	70.917	0.466613	20.6157					23.072	0.07	0.597069	0.00711829				8.402	50.115	0.217431	5.09619
			3.639	0.043	0.518197	0.00908476				3.791	0.017	0.539842	0.00359165					1.121	4.987	0.0747675	1.44973				3.895	41.332	0.259785	12.0153					26.408	0.074	0.6834	0.00752505				6.198	18.23	0.160395	1.85381
			2.143	0.043	0.305165	0.00908476				2.821	0.018	0.401713	0.00380292					1.262	0.309	0.0841718	0.0898269				2.185	20.83	0.145733	6.05532					16.089	0.058	0.41636	0.00589801				9.931	59.935	0.257	6.09478
			13.009	0.044	1.85249	0.00929603				3.78	0.014	0.538275	0.00295783					0.903	0.339	0.0602275	0.0985479				6.177	63.945	0.411988	18.5889					45.06	0.05	1.16609	0.00508449				7.381	37.569	0.191009	3.82039
			3.987	0.048	0.567752	0.0101411				1.115	0.021	0.158777	0.00443674					1.282	0.042	0.0855057	0.0122095				5.14	42.861	0.342823	12.4598					21.252	0.069	0.54997	0.0070166				7.075	35.928	0.183091	3.65351
			6.979	0.041	0.993816	0.00866221				1.827	0.023	0.260166	0.00485929					0.792	0.203	0.0528241	0.0590125				2.552	24.141	0.170211	7.01783					4.775	0.048	0.12357	0.00488111				8.187	49.638	0.211867	5.04768
			4.491	0.042	0.639522	0.00887349				1.357	0.022	0.193238	0.00464802					1.113	0.015	0.0742339	0.00436053				5.054	50.065	0.337087	14.554					77.782	0.247	2.01288	0.0251174				11.577	27.854	0.299596	2.83247
			4.902	0.047	0.698049	0.00992985				5.719	0.023	0.814391	0.00485929					0.799	0.047	0.053291	0.013663				3.145	25.253	0.209763	7.34109					114.923	0.053	2.97404	0.00538956				7.466	41.143	0.193209	4.18383
			13.425	0.044	1.91173	0.00929603				2.543	0.032	0.362125	0.00676075					1.001	0.008	0.0667638	0.00232561				4.818	49.938	0.321347	14.5171					69.645	0.059	1.80231	0.0059997				10.427	67.517	0.269835	6.86579
			5.05	0.037	0.719124	0.00781712				2.906	0.02	0.413817	0.00422547					1.277	0.011	0.0851723	0.00319772				3.647	37.078	0.243244	10.7786					90.342	0.053	2.33792	0.00538956				10.245	69.522	0.265125	7.06968
			1.558	0.047	0.221861	0.00992985				3.655	0.021	0.520475	0.00443674					5.097	54.71	0.339955	15.9043				5.247	56.751	0.34996	16.4976					87.488	0.047	2.26406	0.00477942				9.164	58.967	0.237151	5.99635
			2.957	0.037	0.421079	0.00781712				1.11	0.026	0.158065	0.00549311					0.795	0.123	0.0530242	0.0357563				6.826	67.307	0.455275	19.5663					85.477	0.056	2.21202	0.00569463				12.806	73.43	0.3314	7.46709
			9.976	0.048	1.42059	0.0101411				0.594	0.023	0.0845861	0.00485929					2.887	0.092	0.192555	0.0267446				3.529	28.544	0.235374	8.29779					69.463	0.04	1.7976	0.00406759				9.806	59.789	0.253765	6.07993
			3.035	0.042	0.432187	0.00887349				0.439	0.017	0.062514	0.00359165					1.047	0.038	0.0698319	0.0110467				4.887	51.339	0.325949	14.9243					95.272	0.046	2.4655	0.00467773				13.665	59.648	0.35363	6.0656
			13.154	0.038	1.87314	0.00802839				3.379	0.02	0.481173	0.00422547					0.939	0.037	0.0626286	0.010756				6.228	58.363	0.41539	16.9662					100.281	0.041	2.59512	0.00416928				6.384	33.193	0.165208	3.37539
			9.373	0.055	1.33472	0.01162				1.235	0.023	0.175865	0.00485929					0.923	0.276	0.0615615	0.0802337				6.53	77.198	0.435532	22.4416					4.262	0.066	0.110294	0.00671153				18.983	129.8	0.491252	13.1993
			6.387	0.035	0.909514	0.00739457				2.977	0.025	0.423927	0.00528184					6.284	65.803	0.419125	19.1291				7.151	81.949	0.476951	23.8227					103.374	0.044	2.67517	0.00447435				9.87	63.401	0.255421	6.44724
			5.747	0.047	0.818378	0.00992985				1.282	0.016	0.182558	0.00338038					1.126	0.022	0.075101	0.00639544				7.418	74.275	0.494759	21.5919					90.515	0.024	2.34239	0.00244056				10.676	64.242	0.276279	6.53276
			1.472	0.049	0.209614	0.0103524				1.605	0.018	0.228553	0.00380292					1.171	0.031	0.0781024	0.00901176				5.423	61.247	0.361699	17.8046					75.377	0.043	1.95065	0.00437266				8.717	54.785	0.225583	5.57108
			2.945	0.04	0.419371	0.00845094				1.376	0.016	0.195944	0.00338038					1.357	6.519	0.090508	1.89509				5.577	63.851	0.37197	18.5616					122.403	0.043	3.16761	0.00437266				7.834	46.436	0.202732	4.72207
			13.154	0.039	1.87314	0.00823967				1.705	0.013	0.242793	0.00274656					3.253	25.864	0.216966	7.51871				6.249	52.194	0.41679	15.1729					88.971	0.038	2.30244	0.00386421				13.291	88.519	0.343951	9.00148
			6.535	0.048	0.93059	0.0101411				1.745	0.03	0.24849	0.0063382					0.884	0.037	0.0589603	0.010756				3.549	31.263	0.236708	9.08821					83.527	0.079	2.16156	0.0080335				21.389	62.778	0.553516	6.38389
			1.257	0.043	0.178998	0.00908476				1.597	0.03	0.227414	0.0063382					0.995	0.016	0.0663637	0.00465123				6.482	56.503	0.432331	16.4255					84.547	0.054	2.18795	0.00549125				7.272	40.94	0.188189	4.16318
			14.121	0.043	2.01084	0.00908476				1.095	0.019	0.155929	0.0040142					4.515	0.072	0.301138	0.0209305				4.466	42.737	0.297869	12.4237					90.782	0.042	2.3493	0.00427097				10.088	68.643	0.261063	6.9803
			2.132	0.056	0.303599	0.0118313				0.94	0.02	0.133857	0.00422547					0.957	0.004	0.0638292	0.00116281				7.581	82.348	0.505631	23.9387					94.701	0.05	2.45072	0.00508449				8.896	58.903	0.230215	5.98984
			8.081	0.048	1.15074	0.0101411				1.066	0.014	0.151799	0.00295783					0.541	0.01	0.0360832	0.00290702				3.318	29.46	0.221301	8.56408					67.787	0.051	1.75423	0.00518618				12.895	81.979	0.333704	8.33643
			6.003	0.043	0.854832	0.00908476				0.771	0.014	0.109791	0.00295783					0.672	0.016	0.0448205	0.00465123				3.117	27.383	0.207895	7.96029					98.534	0.05	2.54991	0.00508449				14.52	91.888	0.375756	9.34408
			2.429	0.044	0.345892	0.00929603				1.854	0.013	0.264011	0.00274656					0.848	0.036	0.0565592	0.0104653				4.744	41.96	0.316411	12.1978					62.39	0.036	1.61456	0.00366083				16.496	11.882	0.426892	1.20828
			15.795	0.056	2.24922	0.0118313				1.464	0.015	0.208475	0.0031691					1.136	0.009	0.075768	0.00261632				8.209	82.989	0.547517	24.1251					113.607	0.049	2.93998	0.0049828				11.003	72.318	0.284741	7.35401
			1.632	0.047	0.232398	0.00992985				0.599	0.017	0.0852981	0.00359165					0.75	0.013	0.0500229	0.00377912				7.116	75.229	0.474617	21.8692					61.717	0.053	1.59714	0.00538956				27.281	18.933	0.705992	1.92529
			10.677	0.043	1.52041	0.00908476				0.483	0.013	0.0687796	0.00274656					0.788	0.043	0.0525574	0.0125002				26.398	0.018	1.76067	0.00523263					111.587	0.03	2.88771	0.0030507				14.955	64.317	0.387013	6.54039
			13.584	0.039	1.93437	0.00823967				1.647	0.013	0.234534	0.00274656					1.386	0.034	0.0924422	0.00988386				4.554	45.107	0.303739	13.1127					48.747	0.069	1.2615	0.0070166				9.718	65.918	0.251487	6.70319
			2.929	0.046	0.417092	0.00971858				3.339	0.016	0.475477	0.00338038					0.715	0.035	0.0476885	0.0101746				6.117	63.786	0.407986	18.5427					44.5	0.04	1.15159	0.00406759				24.961	166.938	0.645954	16.9759
			4.064	0.044	0.578717	0.00929603				1.16	0.02	0.165185	0.00422547					1.089	0.012	0.0726332	0.00348842				6.808	67.487	0.454074	19.6186					91.774	0.053	2.37498	0.00538956				23.344	18.527	0.604108	1.88401
			3.856	0.045	0.549098	0.00950731				0.755	0.024	0.107513	0.00507056					0.895	0.022	0.0596939	0.00639544				4.198	42.723	0.279995	12.4197					102.623	0.045	2.65573	0.00457604				24.17	14.294	0.625484	1.45355
			11.832	0.059	1.68489	0.0124651				1.459	0.017	0.207763	0.00359165					3.222	26.803	0.214898	7.79168				4.424	40.859	0.295068	11.8778					40.034	0.052	1.03602	0.00528787				10.054	58.069	0.260183	5.90503
			3.451	0.043	0.491425	0.00908476				2.094	0.019	0.298187	0.0040142					0.897	0.019	0.0598273	0.00552333				6.284	50.703	0.419125	14.7395					62.468	0.046	1.61658	0.00467773				12.78	96.194	0.330727	9.78195
			13.816	0.055	1.96741	0.01162				5.776	0.016	0.822507	0.00338038					0.967	0.053	0.0644961	0.0154072				4.36	42.464	0.2908	12.3444					121.305	0.059	3.13919	0.0059997				32.52	10.187	0.841569	1.03591
			2.207	0.051	0.314279	0.0107749				1.707	0.018	0.243078	0.00380292					3.562	13.236	0.237575	3.84773				5.539	50.973	0.369435	14.8179					106.697	0.055	2.76116	0.00559294				11.475	89.604	0.296956	9.11182
			6.958	0.057	0.990825	0.0120426				5.011	0.022	0.713571	0.00464802					1.956	12.442	0.13046	3.61691				4.582	44.399	0.305606	12.9069					109.319	0.041	2.82901	0.00416928				11.163	63.384	0.288882	6.44551
			3.527	0.046	0.502248	0.00971858				3.381	0.015	0.481457	0.0031691					5.732	61.355	0.382308	17.836				6.227	48.524	0.415323	14.106					2.454	0.018	0.0635059	0.00183042				17.659	134.229	0.456989	13.6497
			11.285	0.059	1.60699	0.0124651				1.293	0.016	0.184124	0.00338038					4.235	34.049	0.282462	9.89811				10.846	113.148	0.723397	32.8923					99.525	0.05	2.57556	0.00508449				9.739	52.599	0.252031	5.34878
			14.681	0.044	2.09059	0.00929603				4.805	0.014	0.684236	0.00295783					0.744	0.026	0.0496227	0.00755825				6.156	57.526	0.410588	16.7229					47.042	0.052	1.21738	0.00528787				14.599	107.753	0.377801	10.9574
			3.46	0.043	0.492707	0.00908476				2.243	0.018	0.319405	0.00380292					1.048	2.485	0.0698986	0.722394				9.369	40.867	0.624886	11.8801					93.602	0.04	2.42228	0.00406759				28.166	172.618	0.728894	17.5535
			12.727	0.043	1.81234	0.00908476				1.665	0.019	0.237097	0.0040142					0.977	3.55	0.0651631	1.03199				3.811	32.98	0.254183	9.58735					106.826	0.049	2.7645	0.0049828				25.645	18.658	0.663655	1.89733
			13.732	0.053	1.95545	0.0111975				6.734	0.023	0.958928	0.00485929					1.027	0.077	0.068498	0.022384				2.322	16.03	0.154871	4.65995					96.244	0.038	2.49065	0.00386421				11.386	79.134	0.294653	8.04712
			10.171	0.047	1.44836	0.00992985				0.915	0.016	0.130297	0.00338038					0.986	0.043	0.0657634	0.0125002				25.061	0.043	1.6715	0.0125002					87.66	0.05	2.26851	0.00508449				15.109	84.977	0.390999	8.6413
			15.653	0.058	2.229	0.0122539				2.041	0.016	0.29064	0.00338038					0.79	0.024	0.0526907	0.00697684				11.34	123.192	0.756346	35.8121					48.891	0.041	1.26523	0.00416928				9.113	59.203	0.235831	6.02034
			18.466	0.052	2.62957	0.0109862				2.905	0.018	0.413675	0.00380292					0.934	0.011	0.0622951	0.00319772				5.806	29.482	0.387244	8.57047					27.477	0.058	0.711064	0.00589801				14.904	111.956	0.385693	11.3848
			13.29	0.043	1.89251	0.00908476				3.559	0.015	0.506805	0.0031691					1.395	0.012	0.0930425	0.00348842				4.077	39.809	0.271924	11.5725					85.092	0.058	2.20206	0.00589801				11.851	89.453	0.306686	9.09646
			12.834	0.04	1.82757	0.00845094				1.286	0.017	0.183128	0.00359165					1.278	0.031	0.085239	0.00901176				4.313	37.993	0.287665	11.0446					105.85	0.047	2.73924	0.00477942				13.982	96.126	0.361833	9.77504
			13.264	0.044	1.88881	0.00929603				4.407	0.015	0.627561	0.0031691					1.595	0.071	0.106382	0.0206398				9.387	80.355	0.626086	23.3593					95.143	0.06	2.46216	0.00610139				14.538	112.354	0.376222	11.4253
			16.227	0.045	2.31074	0.00950731				1.021	0.015	0.145391	0.0031691					2.232	19.574	0.148868	5.6902				29.984	0.025	1.99985	0.00726755					71.15	0.058	1.84126	0.00589801				12.333	79.526	0.31916	8.08699
			5.297	0.044	0.754297	0.00929603				2.541	0.016	0.361841	0.00338038					2.742	0.036	0.182884	0.0104653				3.062	18.471	0.204227	5.36955					24.28	0.075	0.62833	0.00762674				9.689	75.297	0.250737	7.65694
			0.322	0.053	0.0458531	0.0111975				4.172	0.019	0.594096	0.0040142					4.705	43.64	0.31381	12.6862				2.504	16.957	0.16701	4.92943					34.023	0.091	0.880465	0.00925378				19.585	130.47	0.506831	13.2675
			0.35	0.053	0.0498403	0.0111975				4.214	0.019	0.600077	0.0040142					1.114	0.006	0.0743006	0.00174421				2.351	13.357	0.156805	3.8829					14.475	0.037	0.374592	0.00376252				33.826	160.094	0.875367	16.2799
			0.449	0.051	0.063938	0.0107749				3.837	0.022	0.546392	0.00464802					0.997	0.028	0.0664971	0.00813965				10.19	97.026	0.679644	28.2056					110.369	0.06	2.85619	0.00610139				12.055	74.648	0.311966	7.59094
			0.345	0.057	0.0491283	0.0120426				3.459	0.02	0.492565	0.00422547					1.16	0.088	0.0773687	0.0255818				5.064	48.703	0.337754	14.1581					55.995	0.05	1.44907	0.00508449				16.988	114.717	0.439624	11.6656
			12.693	0.049	1.80749	0.0103524				3.416	0.017	0.486441	0.00359165					0.868	0.05	0.0578931	0.0145351				2.917	16.676	0.194556	4.84774					40.523	0.052	1.04868	0.00528787				12.029	83.87	0.311293	8.52873
			0.318	0.049	0.0452835	0.0103524				4.5	0.015	0.640804	0.0031691					1.434	0.096	0.0956437	0.0279074				6.812	49.918	0.454341	14.5113					52.93	0.049	1.36975	0.0049828				10.637	62.873	0.27527	6.39355
			19.734	0.048	2.81014	0.0101411				1.397	0.02	0.198934	0.00422547					2.449	15.087	0.163341	4.38582				7.317	57.553	0.488023	16.7308					25.145	0.064	0.650715	0.00650815				11.413	68.803	0.295352	6.99657
			7.315	0.054	1.04166	0.0114088				2.192	0.019	0.312143	0.0040142					1.002	0.011	0.0668305	0.00319772				2.679	27.772	0.178682	8.07337					28.253	0.061	0.731146	0.00620308				9.642	66.54	0.249521	6.76644
			10.511	0.052	1.49678	0.0109862				2.183	0.013	0.310861	0.00274656					1.808	15.195	0.120588	4.41721				0.973	0.031	0.0648963	0.00901176					16.105	51.597	0.416774	5.24689				10.517	61.367	0.272164	6.2404
			11.403	0.042	1.6238	0.00887349				2.215	0.015	0.315418	0.0031691					1.925	14.311	0.128392	4.16023				5.907	0.094	0.39398	0.027326					14.253	51.241	0.368847	5.21069				10.432	71.703	0.269965	7.29147
			18	0.046	2.56322	0.00971858				2.493	0.02	0.355005	0.00422547					3.636	0.024	0.242511	0.00697684				3.925	0.062	0.261786	0.0180235					17.212	53.566	0.445421	5.44712				14.853	92.535	0.384374	9.40987
			10.33	0.037	1.471	0.00781712				3.47	0.018	0.494131	0.00380292					0.817	0.034	0.0544916	0.00988386				5.963	46.766	0.397715	13.595					15.4	54.097	0.398529	5.50112				11.519	75.047	0.298095	7.63152
			14.272	0.048	2.03235	0.0101411				2.972	0.016	0.423215	0.00338038					1.898	0.91	0.126591	0.264539				3.329	0.025	0.222035	0.00726755					12.756	43.349	0.330106	4.40815				12.028	86.717	0.311267	8.81824
			20.44	0.056	2.91067	0.0118313				6.171	0.013	0.878756	0.00274656					0.9	0.01	0.0600274	0.00290702				6.756	34.96	0.450606	10.1629					4.746	7.289	0.122819	0.741217				71.81	0.056	1.85834	0.00569463
			22.48	0.051	3.20117	0.0107749				3.089	0.018	0.439876	0.00380292					0.842	0.061	0.056159	0.0177328				1.093	0.022	0.0729	0.00639544					15.056	52.774	0.389627	5.36658				12.913	55.535	0.334169	5.64735
			14.279	0.044	2.03334	0.00929603				1.284	0.012	0.182843	0.00253528					2.255	0.18	0.150402	0.0523263				8.404	0.028	0.560523	0.00813965					14.696	52.536	0.380311	5.34238				10.622	75.622	0.274882	7.68999
			21.508	0.048	3.06276	0.0101411				4.465	0.018	0.63582	0.00380292					1.022	0.016	0.0681645	0.00465123				1.075	0.04	0.0716994	0.0116281					8.264	19.129	0.21386	1.94523				10.996	79.348	0.28456	8.06889
			0.438	0.06	0.0623716	0.0126764				4.978	0.018	0.708872	0.00380292					1.018	0.015	0.0678977	0.00436053				11.729	0.019	0.782291	0.00552333					6.989	23.028	0.180865	2.34171				15.219	64.142	0.393845	6.52259
			25.738	0.049	3.66511	0.0103524				3.68	0.014	0.524035	0.00295783					0.724	0.012	0.0482887	0.00348842				3.224	0.014	0.215032	0.00406983					10.713	9.9	0.277237	1.00673				15.134	55.259	0.391646	5.61928
			18.432	0.041	2.62473	0.00866221				0.448	0.019	0.0637956	0.0040142					1.679	10.872	0.111985	3.16051				3.134	17.125	0.209029	4.97827					11.548	22.529	0.298845	2.29097				17.308	128.364	0.447905	13.0533
			24.288	0.045	3.45863	0.00950731				2.151	0.017	0.306304	0.00359165					1.362	0.037	0.0908415	0.010756				16.461	0.021	1.0979	0.00610474					13.488	41.455	0.349049	4.21555				12.183	84.118	0.315278	8.55395
			30.148	0.049	4.2931	0.0103524				4.294	0.019	0.611469	0.0040142					1.023	0.025	0.0682312	0.00726755				13.036	0.019	0.869464	0.00552333					22.132	85.779	0.572743	8.72285				8.909	55.85	0.230552	5.67938
			16.329	0.054	2.32526	0.0114088				2.541	0.014	0.361841	0.00295783					2.82	18.693	0.188086	5.43409				8.333	0.018	0.555787	0.00523263					20.74	58.855	0.536721	5.98496				15.611	119.161	0.40399	12.1175
			14.706	0.042	2.09415	0.00887349				3.588	0.011	0.510934	0.00232401					1.726	0.833	0.115119	0.242155				3.272	20.296	0.218233	5.90008					8.19	0.209	0.211945	0.0212532				21.645	112.399	0.560141	11.4298
			17.989	0.053	2.56165	0.0111975				3.89	0.014	0.553939	0.00295783					2.104	14.884	0.140331	4.32681				6.503	27.61	0.433732	8.02628					17.415	58.727	0.450674	5.97194				162.592	65.523	4.20764	6.66302
			20.66	0.049	2.942	0.0103524				3.949	0.02	0.562341	0.00422547					6.34	70.073	0.42286	20.3703				11.798	5.419	0.786893	1.57531					17.336	42.814	0.44863	4.35375				129.653	50.929	3.35523	5.17896
			23.982	0.044	3.41506	0.00929603				0.446	0.02	0.0635108	0.00422547					3.056	22.67	0.203826	6.59021				1.785	0.026	0.119054	0.00755825					22.774	0.065	0.589357	0.00660984				83.965	32.267	2.17289	3.28123
			23.625	0.044	3.36422	0.00929603				3.669	0.016	0.522469	0.00338038					1.669	1.487	0.111318	0.432274				1.183	0.061	0.0789027	0.0177328					16.292	56.274	0.421613	5.72249				70.383	25.474	1.82141	2.59045
			20.319	0.048	2.89344	0.0101411				4.519	0.012	0.64351	0.00253528					1.719	13.751	0.114652	3.99744				5.808	0.016	0.387377	0.00465123					14.25	49.087	0.368769	4.99165				74.506	27.303	1.92811	2.77644
			23.371	0.045	3.32805	0.00950731				7.245	0.015	1.03169	0.0031691					3.049	27.973	0.20336	8.1318				6.244	33.053	0.416457	9.60857					17.044	50.497	0.441074	5.13503				87.344	32.357	2.26033	3.29038
			22.394	0.051	3.18893	0.0107749				1.946	0.017	0.277112	0.00359165					2.284	0.41	0.152336	0.119188				3.025	0.008	0.201759	0.00232561					12.852	35.021	0.332591	3.56128				44.942	21.072	1.16303	2.14281
			18.475	0.05	2.63086	0.0105637				3.852	0.017	0.548528	0.00359165					0.973	1.935	0.0648963	0.562508				1.218	0.045	0.0812371	0.0130816					3.917	0.124	0.101366	0.0126095				97.686	38.683	2.52797	3.93367
			0.457	0.057	0.0650772	0.0120426				3.806	0.017	0.541978	0.00359165					5.253	32.168	0.35036	9.3513				5.195	23.193	0.346492	6.74225					7.897	25.512	0.204363	2.59431				102.595	38.324	2.65501	3.89716
			0.909	0.098	0.129442	0.0207048				3.41	0.02	0.485587	0.00422547					8.454	95.807	0.563858	27.8513				1.933	0.059	0.128926	0.0171514					5.309	0.223	0.137389	0.0226768				51.233	18.592	1.32583	1.89062
			23.345	0.043	3.32435	0.00908476				3.243	0.013	0.461806	0.00274656					6.185	18.496	0.412522	5.37682				10.126	0.021	0.675375	0.00610474					13.853	42.234	0.358495	4.29477				177.48	77.403	4.59292	7.8711
			12.623	0.055	1.79753	0.01162				2.859	0.017	0.407124	0.00359165					5.425	16.369	0.361832	4.7585				4.011	0.021	0.267522	0.00610474					19.004	57.238	0.491795	5.82052				118.797	47.119	3.07429	4.79152
			0.39	0.052	0.0555363	0.0109862				3.043	0.014	0.433326	0.00295783					5.628	18.746	0.375372	5.4495				1.746	0.025	0.116453	0.00726755					20.381	69.248	0.52743	7.04182				76.101	26.708	1.96938	2.71593
			17.945	0.043	2.55538	0.00908476				0.467	0.016	0.0665012	0.00338038					10.688	0.007	0.712859	0.00203491				1.001	0.025	0.0667638	0.00726755					13.538	44.04	0.350343	4.47842				159.35	63.007	4.12374	6.40717
			18.093	0.048	2.57646	0.0101411				5.797	0.012	0.825498	0.00253528					4.948	0.021	0.330017	0.00610474				7.107	72.027	0.474017	20.9384					2.396	0.425	0.0620049	0.0432182				89.297	42.445	2.31087	4.31623
			0.524	0.071	0.0746181	0.0150004				4.96	0.014	0.706308	0.00295783					5.076	0.032	0.338555	0.00930246				9.337	8.545	0.622751	2.48405					24.153	96.802	0.625044	9.84378				62.876	21.908	1.62714	2.22782
			0.348	0.042	0.0495555	0.00887349				4.663	0.019	0.664015	0.0040142					3.736	0.02	0.249181	0.00581404				1.306	0.056	0.0871065	0.0162793					3.019	0.087	0.0781273	0.00884702				9.555	1.471	0.247269	0.149586
			20.646	0.043	2.94001	0.00908476				0.424	0.017	0.060378	0.00359165					3.081	0.029	0.205494	0.00843035				1.234	0.031	0.0823043	0.00901176					20.181	69.396	0.522254	7.05687				92.256	38.129	2.38745	3.87733
			21.534	0.054	3.06646	0.0114088				3.661	0.018	0.52133	0.00380292					14.703	0.023	0.980648	0.00668614				1.446	0.015	0.0964441	0.00436053					22.135	81.198	0.572821	8.25701				73.181	25.875	1.89382	2.63122
			20.36	0.045	2.89928	0.00950731				3.994	0.017	0.568749	0.00359165					13.927	0.011	0.928891	0.00319772				8.149	11.124	0.543515	3.23377					10.035	23.141	0.259691	2.3532				118.271	43.64	3.06068	4.43775
			0.477	0.051	0.0679252	0.0107749				4.118	0.01	0.586407	0.00211273					7.084	0.026	0.472483	0.00755825				5.41	30.48	0.360832	8.86059					17.691	63.683	0.457817	6.47591				56.778	19.895	1.46933	2.02312
			19.943	0.062	2.8399	0.013099				1.496	0.018	0.213032	0.00380292					10.013	0.032	0.667839	0.00930246				1.014	0.027	0.0676309	0.00784895					10.487	30.718	0.271388	3.12371				50.858	16.429	1.31613	1.67066
			0.412	0.051	0.0586692	0.0107749				1.324	0.015	0.188539	0.0031691					5.302	0.024	0.353628	0.00697684				1.843	0.024	0.122923	0.00697684					10.425	33.979	0.269784	3.45532				40.839	13.768	1.05685	1.40007
			13.043	0.068	1.85733	0.0143666				2.983	0.018	0.424782	0.00380292					4.341	0.024	0.289532	0.00697684				3.916	0.032	0.261186	0.00930246					92.498	0.019	2.39371	0.00193211				73.268	27.092	1.89607	2.75498
			21.228	0.058	3.02289	0.0122539				3.768	0.013	0.536567	0.00274656					5.69	0.026	0.379507	0.00755825				1.471	0.141	0.0981115	0.040989					85.376	0.026	2.2094	0.00264394				78.419	28.708	2.02937	2.91931
			23.895	0.053	3.40267	0.0111975				1.172	0.014	0.166894	0.00295783					8.582	0.032	0.572395	0.00930246				2.184	0.014	0.145667	0.00406983					58.278	0.018	1.50815	0.00183042				40.195	2.939	1.04019	0.298866
			23.549	0.049	3.3534	0.0103524				3.067	0.019	0.436743	0.0040142					22.643	0.013	1.51022	0.00377912				1.616	0.021	0.107783	0.00610474					33.246	0.043	0.860357	0.00437266				103.041	40.702	2.66655	4.13898
			17.617	0.048	2.50868	0.0101411				3.051	0.021	0.434465	0.00443674					5.148	0.022	0.343357	0.00639544				1.379	0.026	0.0919754	0.00755825					14.824	51.131	0.383623	5.1995				77.467	26.877	2.00473	2.73312
			0.433	0.071	0.0616596	0.0150004				0.79	0.018	0.112497	0.00380292					14.85	0.033	0.990453	0.00959316				1.433	0.019	0.095577	0.00552333					15.399	42.645	0.398503	4.33656				54.609	19.616	1.4132	1.99475
			0.387	0.057	0.0551091	0.0120426				3.578	0.015	0.50951	0.0031691					11.026	0.022	0.735403	0.00639544				1.694	3.18	0.112985	0.924432					96.485	0.026	2.49689	0.00264394				60.284	20.756	1.56006	2.11067
			0.382	0.052	0.0543971	0.0109862				5.355	0.019	0.762557	0.0040142					5.613	0.043	0.374371	0.0125002				1.32	0.023	0.0880402	0.00668614					35.967	0.017	0.930773	0.00172873				117.544	40.425	3.04186	4.11081
			2.846	0.044	0.405273	0.00929603				1.6	0.013	0.227841	0.00274656					14.395	0.023	0.960105	0.00668614				1.424	0.068	0.0949767	0.0197677					17.323	42.961	0.448294	4.3687				96.546	33.828	2.49847	3.43996
			4.617	0.046	0.657465	0.00971858				6.432	0.015	0.915922	0.0031691					5.337	0.036	0.355963	0.0104653				1.322	0.026	0.0881736	0.00755825					16.48	60.18	0.426478	6.1197				57.809	19.055	1.49601	1.9377
			6.298	0.046	0.896841	0.00971858				1.071	0.016	0.152511	0.00338038					5.884	0.042	0.392446	0.0122095				1.125	0.028	0.0750343	0.00813965					11.087	33.466	0.286915	3.40315				111.854	40.415	2.89462	4.1098
			10.294	0.045	1.46587	0.00950731				2.106	0.022	0.299896	0.00464802					5.704	0.035	0.380441	0.0101746				2.086	2.232	0.13913	0.648846					63.095	0.022	1.63281	0.00223718				71.875	24.414	1.86002	2.48266
			11.231	0.066	1.5993	0.013944				2.262	0.023	0.322111	0.00485929					5.98	0.028	0.398849	0.00813965				1.109	0.026	0.0739671	0.00755825					46.676	0.038	1.20791	0.00386421				92.751	33.036	2.40026	3.35943
			4.532	0.047	0.645361	0.00992985				1.143	0.018	0.162764	0.00380292					7.757	0.041	0.51737	0.0119188				18.406	2.706	1.22763	0.786639					44.707	0.019	1.15695	0.00193211				84.554	33.185	2.18813	3.37458
			4.319	0.041	0.615029	0.00866221				1.969	0.018	0.280387	0.00380292					4.64	0.044	0.309475	0.0127909				1.353	0.151	0.0902412	0.043896					13.082	27.768	0.338543	2.82372				47.294	15.222	1.2239	1.54792
			11.796	0.044	1.67976	0.00929603				3.883	0.043	0.552943	0.00908476					12.715	0.022	0.848054	0.00639544				5.685	64.079	0.379173	18.6279					33.865	0.023	0.876376	0.00233887				126.768	49.309	3.28057	5.01422
			11.188	0.048	1.59318	0.0101411				1.089	0.026	0.155075	0.00549311					5.997	0.051	0.399983	0.0148258				1.603	6.663	0.106916	1.93695					63.124	0.024	1.63356	0.00244056				144.138	63.833	3.73008	6.49117
			7.626	0.046	1.08595	0.00971858				0.615	0.02	0.0875765	0.00422547					8.364	0.048	0.557855	0.0139537				1.312	0.042	0.0875067	0.0122095					17.983	44.907	0.465373	4.56659				90.444	32.17	2.34056	3.27136
			12.441	0.042	1.77161	0.00887349				1.663	0.015	0.236813	0.0031691					7.019	0.028	0.468147	0.00813965				2.86	0.061	0.190754	0.0177328					15.94	33.502	0.412504	3.40681				127.301	47.481	3.29436	4.82834
			4.95	0.047	0.704884	0.00992985				1.545	0.029	0.220009	0.00612693					14.182	0.047	0.945899	0.013663				1.021	0.029	0.0680978	0.00843035					11.932	37.834	0.308783	3.84733				115.555	42.022	2.99039	4.27321
			4.569	0.047	0.65063	0.00992985				1.78	0.014	0.253474	0.00295783					8.885	0.053	0.592604	0.0154072				6.503	71.832	0.433732	20.8817					16.216	40.252	0.419646	4.09322				58.698	21.393	1.51902	2.17545
			15.676	0.047	2.23228	0.00992985				2.495	0.018	0.35529	0.00380292					7.988	0.066	0.532777	0.0191863				8.49	65.662	0.566259	19.0881					65.156	0.016	1.68614	0.00162704				85.575	30.815	2.21455	3.13357
			2.481	0.05	0.353297	0.0105637				1.732	28.666	0.246638	6.05637					24.197	0.033	1.61387	0.00959316				9.655	13.023	0.643961	3.78581					73.532	0.028	1.9029	0.00284732				65.256	23.164	1.68873	2.35554
			17.34	0.047	2.46923	0.00992985				2.245	41.335	0.31969	8.73299					17.099	0.059	1.14045	0.0171514				16.129	1.634	1.07576	0.475007					68.305	0.024	1.76763	0.00244056				32.421	0.221	0.839008	0.0224735
			14.599	0.038	2.07891	0.00802839				1.578	0.024	0.224709	0.00507056					13.381	0.05	0.892475	0.0145351				5.918	40.7	0.394714	11.8316					21.149	68.18	0.547305	6.93321				11.577	82.771	0.299596	8.41697
			14.654	0.042	2.08674	0.00887349				2.213	41.831	0.315133	8.83778					6.082	0.041	0.405652	0.0119188				3.737	2.894	0.249247	0.841291					3.755	0.049	0.0971738	0.0049828				11.891	86.322	0.307721	8.77807
			13.068	0.044	1.86089	0.00929603				3.211	53.915	0.457249	11.3908					10.973	0.07	0.731868	0.0203491				8.561	24.346	0.570994	7.07743					15.27	38.404	0.395165	3.9053				13.207	96.651	0.341778	9.82843
			9.223	0.056	1.31336	0.0118313				2.367	0.058	0.337063	0.0122539					5.748	0.054	0.383375	0.0156979				6.838	20.728	0.456075	6.02567					14.304	11.593	0.370166	1.17889				10.094	62.828	0.261218	6.38897
			11.188	0.047	1.59318	0.00992985				2.588	0.062	0.368533	0.013099					8.799	0.04	0.586868	0.0116281				16.747	2.234	1.11698	0.649428					11.072	21.555	0.286527	2.19192				13.467	91.637	0.348506	9.31855
			5.636	0.047	0.802571	0.00992985				2.642	0.03	0.376223	0.0063382					6.535	0.035	0.435866	0.0101746				3.449	23.434	0.230038	6.81231					7.529	21.214	0.194839	2.15725				13.27	91.932	0.343408	9.34855
			13.967	0.052	1.98891	0.0109862				1.309	0.029	0.186403	0.00612693					10.405	0.04	0.693984	0.0116281				2.586	0.024	0.172479	0.00697684					26.677	29.012	0.690361	2.95023				11.837	84.471	0.306324	8.58984
			16.271	0.051	2.317	0.0107749				1.097	0.091	0.156214	0.0192259					12.046	0.023	0.803434	0.00668614				10.298	0.475	0.686847	0.138083					51.101	0.077	1.32242	0.00783012				10.98	74.325	0.284146	7.5581
			9.954	0.054	1.41746	0.0114088				4.562	0.016	0.649633	0.00338038					5.862	0.053	0.390979	0.0154072				22.191	0.861	1.48008	0.250294					39.283	1.185	1.01659	0.120502				9.511	55.357	0.246131	5.62925
			13.863	0.045	1.9741	0.00950731				3.513	0.025	0.500254	0.00528184					11.552	0.028	0.770485	0.00813965				42.965	0.028	2.86564	0.00813965					25.189	3.593	0.651854	0.365372				13.233	86.639	0.34245	8.81031
			10.019	0.052	1.42671	0.0109862				6.239	0.022	0.888439	0.00464802					9.482	0.024	0.632422	0.00697684				1.217	0.083	0.0811704	0.0241283					14.023	37.539	0.362894	3.81734				10.828	74.717	0.280213	7.59796
			3.322	0.054	0.473056	0.0114088				3.014	0.022	0.429196	0.00464802					8.775	0.038	0.585267	0.0110467				4.714	0.329	0.31441	0.0956409					5.152	0.033	0.133326	0.00335577				11.289	72.865	0.292143	7.40963
			8.688	0.048	1.23718	0.0101411				1.441	0.032	0.2052	0.00676075					5.244	0.029	0.34976	0.00843035				9.189	0.019	0.61288	0.00552333					13.478	40.346	0.348791	4.10278				14.24	103.755	0.36851	10.5508
			4.791	0.054	0.682243	0.0114088				1.999	0.017	0.284659	0.00359165					10.582	0.036	0.705789	0.0104653				2.487	0.03	0.165876	0.00872105					20.81	56.896	0.538532	5.78575				12.807	87.504	0.331426	8.89827
			14.097	0.053	2.00743	0.0111975				5.212	0.013	0.742193	0.00274656					23.218	0.028	1.54857	0.00813965				1.45	0.018	0.0967109	0.00523263					4.845	0.03	0.125381	0.0030507				10.546	61.392	0.272915	6.24294
			6.078	0.046	0.865513	0.00971858				6.544	0.015	0.931871	0.0031691					8.531	0.049	0.568993	0.0142444				8.482	46.071	0.565725	13.3929					19.664	41.4	0.508875	4.20996				9.711	67.211	0.251306	6.83468
			3.84	0.056	0.546819	0.0118313				5.059	96.378	0.720406	20.3621					15.431	0.023	1.0292	0.00668614				9.822	6.331	0.655099	1.84043					17.049	52.032	0.441203	5.29113				7.277	45.467	0.188318	4.62353
			7.894	0.066	1.12411	0.013944				3.369	0.022	0.479749	0.00464802					24.008	0.027	1.60127	0.00784895				7.299	24.275	0.486822	7.05679					16.332	41.73	0.422648	4.24352				10.916	77.213	0.28249	7.85178
			11.324	0.049	1.61255	0.0103524				1.774	0.025	0.252619	0.00528184					5.761	0.046	0.384242	0.0133723				1.176	0.068	0.0784358	0.0197677					13.268	7.051	0.343356	0.717015				8.521	51.737	0.220511	5.26113
			12.042	0.047	1.71479	0.00992985				5.399	0.018	0.768822	0.00380292					7.844	0.062	0.523172	0.0180235				9.461	24.997	0.631022	7.26667					31.511	26.188	0.815458	2.66305				14.816	114.3	0.383416	11.6232
			2.985	0.047	0.425067	0.00992985				4.678	0.015	0.666151	0.0031691					5.747	0.043	0.383309	0.0125002				4.538	46.183	0.302672	13.4255					29.853	33.155	0.772551	3.37153				9.015	52.39	0.233295	5.32753
			3.88	0.053	0.552515	0.0111975				2.205	0.027	0.313994	0.00570438					7.394	0.046	0.493159	0.0133723				4.762	49.549	0.317612	14.404					15.561	40.67	0.402696	4.13573				11.155	70.359	0.288675	7.1548
			11.646	0.054	1.6584	0.0114088				4.798	0.018	0.683239	0.00380292					5.837	0.012	0.389311	0.00348842				3.275	26.105	0.218433	7.58877					22.296	33.992	0.576987	3.45664				14.014	93.369	0.362662	9.49468
			8.309	0.051	1.18321	0.0107749				4.648	0.012	0.661879	0.00253528					6.669	0.061	0.444803	0.0177328				9.231	102.064	0.615681	29.6702					14.614	13.42	0.378189	1.36468				10.917	69.413	0.282516	7.0586
			8.719	0.051	1.24159	0.0107749				1.671	26.325	0.237952	5.56177					10.567	0.041	0.704789	0.0119188				5.883	50.036	0.392379	14.5456					34.2	29.987	0.885045	3.04937				14.207	97.384	0.367656	9.90296
			5.953	0.051	0.847712	0.0107749				4.685	0.02	0.667148	0.00422547					5.723	0.055	0.381708	0.0159886				3.882	33.077	0.258918	9.61554					16.011	23.014	0.414341	2.34029				19.963	163.565	0.516613	16.6329
			10.594	0.051	1.50859	0.0107749				4.549	0.021	0.647782	0.00443674					6.604	0.044	0.440468	0.0127909				3.862	34.198	0.257584	9.94142					7.702	11.323	0.199316	1.15143				15.917	105.354	0.411908	10.7134
			5.389	0.053	0.767398	0.0111975				1.225	0.061	0.174441	0.0128877					19.56	0.057	1.3046	0.01657				5.562	39.897	0.37097	11.5981					24.268	11.242	0.62802	1.1432				9.86	66.558	0.255162	6.76827
			8.807	0.048	1.25412	0.0101411				4.211	0.019	0.59965	0.0040142					6.168	0.05	0.411388	0.0145351				5.637	56.25	0.375972	16.352					13.515	29.044	0.349748	2.95348				8.89	52.652	0.23006	5.35417
			5.71	0.053	0.813109	0.0111975				4.034	0.02	0.574445	0.00422547					8.563	0.059	0.571128	0.0171514				10.182	65.141	0.67911	18.9366					15.642	0.024	0.404792	0.00244056				11.781	83.543	0.304875	8.49548
			6.648	0.051	0.946681	0.0107749				5.635	0.023	0.802429	0.00485929					7.343	0.081	0.489757	0.0235468				4.638	43.376	0.309341	12.6095					36.266	31.006	0.93851	3.153				11.676	81.234	0.302158	8.26067
			9.764	0.053	1.3904	0.0111975				3.91	71.277	0.556787	15.0589					9.173	0.073	0.611813	0.0212212				3.172	23.042	0.211563	6.69835					19.912	55.831	0.515293	5.67745				15.367	111.696	0.397675	11.3583
			9.972	0.051	1.42002	0.0107749				3.314	0.02	0.471917	0.00422547					12.333	0.034	0.822576	0.00988386				4.566	43.125	0.304539	12.5365					22.507	8.642	0.582448	0.878804				10.153	65.789	0.262745	6.69007
			10.35	0.049	1.47385	0.0103524				4.493	80.969	0.639807	17.1066					5.766	0.051	0.384576	0.0148258				5.927	57.485	0.395314	16.711					27.478	17.618	0.71109	1.79157				11.016	75.727	0.285078	7.70067
			6.428	0.049	0.915353	0.0103524				4.306	0.038	0.613178	0.00802839					14.888	0.028	0.992987	0.00813965				2.642	21.618	0.176214	6.28439					110.89	0.018	2.86967	0.00183042				10.709	73.151	0.277133	7.43871
			8.294	0.054	1.18107	0.0114088				5.647	0.015	0.804138	0.0031691					10.962	0.053	0.731134	0.0154072				4.468	39.061	0.298003	11.3551					89.104	0.017	2.30588	0.00172873				13.382	91.624	0.346306	9.31723
			4.423	0.036	0.629839	0.00760584				7.761	0.019	1.10517	0.0040142					9.959	0.064	0.664237	0.0186049				5.217	51.703	0.347959	15.0302					70.434	0.019	1.82273	0.00193211				15.722	103.969	0.406862	10.5726
			1.533	50.72	0.218301	10.7158				6.68	0.068	0.951238	0.0143666					12.968	0.042	0.864929	0.0122095				3.747	36.67	0.249914	10.66					50.514	0.026	1.30723	0.00264394				9.365	55.76	0.242352	5.67023
			1.803	63.741	0.256749	13.4668				5.352	0.021	0.76213	0.00443674					10.986	0.021	0.732735	0.00610474				7.539	50.351	0.50283	14.6371					66.436	0.017	1.71927	0.00172873				21.52	129.522	0.556906	13.1711
			1.919	59.961	0.273267	12.6682				5.425	0.019	0.772525	0.0040142					12.742	0.03	0.849855	0.00872105				9.703	90.028	0.647162	26.1713					39.679	0.016	1.02683	0.00162704				19.969	156.251	0.516768	15.8891
			2.614	79.619	0.372236	16.8214				2.214	0.055	0.315276	0.01162					11.573	0.085	0.771886	0.0247097				5.786	50.471	0.38591	14.672					40.61	0.019	1.05093	0.00193211				12.501	81.329	0.323507	8.27033
			1.714	55.233	0.244075	11.6693				4.179	76.827	0.595093	16.2315					9.051	0.041	0.603676	0.0119188				6.003	62.418	0.400383	18.145					66.786	0.02	1.72832	0.0020338				16.453	92.591	0.425779	9.41557
			2.138	46.104	0.304453	9.74055				3.858	0.029	0.549383	0.00612693					7.511	0.035	0.500962	0.0101746				6.264	62.009	0.417791	18.0261					66.203	0.012	1.71324	0.00122028				10.312	59.93	0.266859	6.09427
			2.81	0.038	0.400146	0.00802839				1.635	0.031	0.232825	0.00654948					6.978	0.067	0.465413	0.019477				5.469	46.796	0.364767	13.6037					110.889	0.025	2.86964	0.00254225				12.277	78.002	0.317711	7.93201
			6.78	0.037	0.965478	0.00781712				2.317	0.025	0.329943	0.00528184					9.548	0.026	0.636824	0.00755825				4.686	50.361	0.312543	14.64					129.07	0.019	3.34014	0.00193211				7.606	42.356	0.196832	4.30718
			1.83	17.032	0.260594	3.59841				3.118	0.033	0.444006	0.00697202					4.884	0.045	0.325749	0.0130816				9.419	92.887	0.62822	27.0024					52.73	0.01	1.36457	0.0010169				16.058	124.986	0.415557	12.7098
			1.161	19.277	0.165327	4.07272				1.754	0.087	0.249771	0.0183808					9.391	0.069	0.626353	0.0200584				5.421	52.868	0.361565	15.3688					57.857	0.019	1.49725	0.00193211				6.873	39.801	0.177863	4.04736
			1.121	0.039	0.159631	0.00823967				1.078	0.055	0.153508	0.01162					4.399	0.019	0.293401	0.00552333				5.124	50.205	0.341756	14.5947					19.541	0.019	0.505692	0.00193211				17.872	74.468	0.462501	7.57264
			0.958	0.039	0.13642	0.00823967				3.283	0.193	0.467502	0.0407758					17.586	0.058	1.17294	0.0168607				4.841	47.157	0.322881	13.7086					87.19	0.02	2.25635	0.0020338				12.29	83.036	0.318047	8.44392
			1.31	28.46	0.186545	6.01284				4.029	0.546	0.573733	0.115355					6.87	0.038	0.458209	0.0110467				5.777	55.586	0.385309	16.159					49.954	0.114	1.29274	0.0115926				14.175	96.529	0.366828	9.81602
			2.489	0.036	0.354436	0.00760584				1.058	3.749	0.15066	0.792064					6.688	0.055	0.446071	0.0159886				5.706	50.343	0.380574	14.6348					46.67	0.057	1.20775	0.00579632				16.252	122.115	0.420578	12.4179
			1.616	0.041	0.23012	0.00866221				2.485	0.082	0.353866	0.0173244					9.985	0.024	0.665971	0.00697684				6.944	72.554	0.463145	21.0916					48.901	0.012	1.26549	0.00122028				13.548	94.147	0.350602	9.57379
			0.855	15.382	0.121753	3.24981				2.453	0.069	0.349309	0.0145779					7.811	0.034	0.520971	0.00988386				7.061	75.42	0.470949	21.9247					34.916	0.026	0.903574	0.00264394				10.328	65.204	0.267273	6.63059
			0.991	17.904	0.141119	3.78264				2.628	65.635	0.37423	13.8669					5.059	0.045	0.337421	0.0130816				5.985	61.707	0.399182	17.9383					88.202	0.015	2.28254	0.00152535				11.87	70.207	0.307178	7.13934
			1.395	22.519	0.198649	4.75767				2.189	55.18	0.311716	11.6581					5.483	0.049	0.3657	0.0142444				3.89	38.59	0.259452	11.2182					41.868	0.015	1.08348	0.00152535				13.348	84.185	0.345426	8.56076
			1.595	16.404	0.227129	3.46573				2.143	48.891	0.305165	10.3294					4.471	0.039	0.298203	0.0113374				5.948	61.124	0.396715	17.7689					46.358	0.019	1.19968	0.00193211				14.561	110.099	0.376817	11.196
			1.36	22.373	0.193665	4.72682				5.929	0.023	0.844295	0.00485929					5.368	0.052	0.35803	0.0151165				27.766	75.434	1.85191	21.9288					145.64	0.018	3.76895	0.00183042				15.16	103.283	0.392318	10.5028
			1.356	15.917	0.193096	3.36284				3.463	87.417	0.493134	18.4689					20.338	0.029	1.35649	0.00843035				4.99	49.137	0.332819	14.2842					23.038	0.021	0.596189	0.00213549				16.054	109.018	0.415454	11.086
			1.856	34.332	0.264296	7.25344				6.898	0.887	0.982281	0.1874					6.967	0.049	0.464679	0.0142444				5.888	51.644	0.392713	15.013					38.619	0.131	0.999403	0.0133214				6.339	31.856	0.164044	3.23943
			0.405	0.043	0.0576724	0.00908476				2.017	45.532	0.287223	9.6197					5.103	0.02	0.340356	0.00581404				3.892	34.643	0.259585	10.0708					56.967	0.022	1.47422	0.00223718				11.34	74.355	0.293462	7.56115
			0.346	0.046	0.0492707	0.00971858				2.138	49.59	0.304453	10.4771					7.93	0.012	0.528908	0.00348842				6.054	55.124	0.403785	16.0246					57.612	0.042	1.49091	0.00427097				16.899	119.423	0.437321	12.1441
			1.808	34.92	0.257461	7.37767				10.67	0.062	1.51942	0.013099					5.522	0.036	0.368302	0.0104653				5.103	41.155	0.340356	11.9638					36.151	0.016	0.935534	0.00162704				24.51	169.39	0.634283	17.2252
			1.637	33.538	0.23311	7.08569				4.798	102.106	0.683239	21.5723					26.321	0.029	1.75554	0.00843035				4.55	37.301	0.303472	10.8435					93.314	0.028	2.41483	0.00284732				6.778	33.955	0.175405	3.45288
			1.905	29.289	0.271274	6.18799				8.712	0.021	1.2406	0.00443674					24.837	0.026	1.65656	0.00755825				5.057	52.967	0.337287	15.3976					36.237	0.023	0.93776	0.00233887				12.749	80.436	0.329925	8.17953
			2.002	47.868	0.285087	10.1132				9.644	0.016	1.37331	0.00338038					22.335	0.024	1.48968	0.00697684				7.693	79.723	0.513101	23.1756					124.658	0.019	3.22596	0.00193211				13.267	83.969	0.34333	8.5388
			2.467	54.109	0.351303	11.4318				12.12	0.016	1.7259	0.00338038					15.949	0.038	1.06375	0.0110467				6.65	69.327	0.443536	20.1535					69.939	0.023	1.80992	0.00233887				48.878	0.05	1.26489	0.00508449
			1.383	27.495	0.19694	5.80896				4.417	0.026	0.628985	0.00549311					23.667	0.032	1.57852	0.00930246				3.555	26.465	0.237108	7.69342					68.464	0.031	1.77175	0.00315239				37.005	0.043	0.957635	0.00437266
			1.517	33.178	0.216022	7.00963				7.778	0.012	1.10759	0.00253528					20.326	0.027	1.35569	0.00784895				5.053	48.886	0.337021	14.2112					40.143	0.146	1.03884	0.0148467				73.388	0.067	1.89917	0.00681322
			1.287	30.535	0.18327	6.45124				12.795	0.017	1.82202	0.00359165					20.923	0.024	1.3955	0.00697684				6.485	69.391	0.432531	20.1721					53.825	0.017	1.39291	0.00172873				34.958	0.065	0.904661	0.00660984
			2.531	62.047	0.360417	13.1089				10.728	0.018	1.52768	0.00380292					23.002	0.018	1.53417	0.00523263				5.222	56.975	0.348293	16.5627					36.765	0.022	0.951424	0.00223718				49.481	0.046	1.2805	0.00467773
			10.058	0.034	1.43227	0.0071833				4.85	0.022	0.690644	0.00464802					22.21	0.023	1.48134	0.00668614				6.4	67.331	0.426862	19.5732					74.609	0.023	1.93077	0.00233887				17.076	78.307	0.441902	7.96303
			3.05	0.033	0.434323	0.00697202				8.499	0.019	1.21027	0.0040142					11.185	0.016	0.746008	0.00465123				6.538	71.543	0.436066	20.7977					49.452	0.046	1.27974	0.00467773				57.62	1.618	1.49112	0.164534
			4.18	0.03	0.595236	0.0063382				10.258	0.017	1.46075	0.00359165					19.369	0.042	1.29186	0.0122095				4.828	51.522	0.322014	14.9775					47.011	0.022	1.21658	0.00223718				61.183	0.05	1.58333	0.00508449
			0.23	0.028	0.0327522	0.00591566				6.953	0.019	0.990113	0.0040142					23.413	0.009	1.56158	0.00261632				5.279	53.036	0.352094	15.4177					62.804	0.03	1.62527	0.0030507				12.294	91.663	0.318151	9.3212
			8.653	0.031	1.23219	0.00654948				9.214	0.017	1.31208	0.00359165					24.138	1.517	1.60994	0.440995				3.374	23.688	0.225036	6.88614					37.024	0.011	0.958126	0.00111859				18.867	44.298	0.48825	4.50466
			0.366	0.17	0.0521187	0.0359165				11.503	0.017	1.63804	0.00359165					24.887	0.03	1.65989	0.00872105				7.174	74.304	0.478485	21.6003					73.276	0.024	1.89627	0.00244056				61.35	0.068	1.58765	0.00691491
			6.503	0.041	0.926033	0.00866221				10.315	0.018	1.46887	0.00380292					10.511	0.015	0.701054	0.00436053				5.361	57.395	0.357563	16.6848					64.949	0.02	1.68078	0.0020338				88.205	0.049	2.28261	0.0049828
			4.339	0.03	0.617877	0.0063382				5.51	0.025	0.784629	0.00528184					28.606	0.026	1.90794	0.00755825				7.756	77.279	0.517303	22.4651					39.757	0.016	1.02885	0.00162704				14.264	34.933	0.369131	3.55233
			11.024	0.037	1.56983	0.00781712				4.835	0.021	0.688508	0.00443674					21.286	0.033	1.41972	0.00959316				4.679	45.463	0.312076	13.2162					46.91	0.031	1.21396	0.00315239				8.807	67.988	0.227912	6.91369
			0.217	0.031	0.030901	0.00654948				8.869	0.02	1.26295	0.00422547					13.814	0.022	0.921354	0.00639544				7.071	63.732	0.471616	18.527					60.236	0.022	1.55882	0.00223718				66.297	0.049	1.71567	0.0049828
			10.153	0.039	1.4458	0.00823967				5.061	0.028	0.720691	0.00591566					19.407	0.025	1.29439	0.00726755				6.318	60.188	0.421393	17.4968					62.746	0.023	1.62377	0.00233887				7.307	49.758	0.189094	5.05988
			2.113	0.031	0.300893	0.00654948				8.099	0.019	1.1533	0.0040142					21.948	0.027	1.46387	0.00784895				7.226	73.056	0.481954	21.2375					64.165	0.029	1.6605	0.00294901				116.195	0.052	3.00695	0.00528787
			4.603	0.042	0.655471	0.00887349				2.937	0.016	0.418231	0.00338038					24.188	0.037	1.61327	0.010756				7.699	79.545	0.513501	23.1239					41.158	0.019	1.06511	0.00193211				56.197	0.063	1.4543	0.00640646
			7.967	0.044	1.13451	0.00929603				13.992	0.016	1.99247	0.00338038					19.953	0.031	1.33081	0.00901176				3.013	25.527	0.200959	7.42075					68.491	0.019	1.77245	0.00193211				32.993	0.055	0.85381	0.00559294
			9.838	0.037	1.40094	0.00781712				8.207	0.019	1.16868	0.0040142					22.444	0.027	1.49695	0.00784895				6.34	61.366	0.42286	17.8392					31.664	0.018	0.819417	0.00183042				39.869	0.051	1.03175	0.00518618
			10.02	0.04	1.42686	0.00845094				9.047	0.019	1.2883	0.0040142					12.31	0.04	0.821042	0.0116281				5.161	53.272	0.344224	15.4863					22.602	0.024	0.584906	0.00244056				83.196	0.046	2.15299	0.00467773
			8.358	0.035	1.19019	0.00739457				7.033	0.023	1.00151	0.00485929					14.449	0.03	0.963707	0.00872105				4.48	48.678	0.298803	14.1508					43.074	0.033	1.11469	0.00335577				56.875	0.041	1.47184	0.00416928
			4.493	0.037	0.639807	0.00781712				8.78	0.016	1.25028	0.00338038					25.101	0.025	1.67417	0.00726755				6.308	59.735	0.420726	17.3651					46.982	0.021	1.21582	0.00213549				54.411	0.051	1.40808	0.00518618
			9.577	0.039	1.36377	0.00823967				8.059	0.019	1.14761	0.0040142					17.687	0.022	1.17967	0.00639544				5.697	54.693	0.379974	15.8994					50.097	0.035	1.29644	0.00355914				13.651	96.17	0.353268	9.77951
			11.796	0.037	1.67976	0.00781712				7.525	0.023	1.07157	0.00485929					10.525	0.026	0.701987	0.00755825				5.184	46.826	0.345758	13.6124					66.458	0.023	1.71983	0.00233887				10.812	75.237	0.279799	7.65084
			1.893	0.038	0.269565	0.00802839				15.423	0.019	2.19625	0.0040142					17.921	0.046	1.19528	0.0133723				6.597	64.045	0.440001	18.618					46.675	0.019	1.20788	0.00193211				9.271	70.403	0.23992	7.15927
			8.169	0.031	1.16327	0.00654948				8.411	0.022	1.19773	0.00464802					11.119	0.034	0.741606	0.00988386				4.371	37.5	0.291533	10.9013					50.395	0.034	1.30415	0.00345745				30.241	46.07	0.782592	4.68485
			8.197	0.042	1.16726	0.00887349				12.11	0.018	1.72447	0.00380292					25.765	0.029	1.71845	0.00843035				4.981	47.358	0.332218	13.7671					58.639	0.024	1.51749	0.00244056				16.486	37.821	0.426633	3.84601
			7.784	0.035	1.10845	0.00739457				6.842	0.016	0.974307	0.00338038					20.953	0.027	1.39751	0.00784895				4.779	43.886	0.318746	12.7577					80.827	0.016	2.09168	0.00162704				52.122	0.045	1.34884	0.00457604
			5.756	0.046	0.819659	0.00971858				8.091	0.018	1.15217	0.00380292					19.708	0.031	1.31447	0.00901176				5.914	65.298	0.394447	18.9822					56.908	0.021	1.47269	0.00213549				51.274	0.052	1.3269	0.00528787
			16.455	0.07	2.34321	0.0147891				3.202	0.046	0.455968	0.00971858					25.867	0.034	1.72526	0.00988386				5.54	58.341	0.369502	16.9598					42.325	26.81	1.09531	2.7263				15.639	41.375	0.404714	4.20742
			15.21	0.038	2.16592	0.00802839				4.013	0.021	0.571455	0.00443674					16.281	0.034	1.0859	0.00988386				5.263	58.346	0.351027	16.9613					70.986	0.02	1.83701	0.0020338				78.568	0.043	2.03322	0.00437266
			5.204	0.038	0.741054	0.00802839				6.325	0.02	0.900686	0.00422547					14.944	0.032	0.996722	0.00930246				5.904	58.979	0.39378	17.1453					89.34	0.019	2.31199	0.00193211				14.218	125.044	0.367941	12.7157
			14.632	0.039	2.08361	0.00823967				6.89	0.018	0.981142	0.00380292					23.128	0.034	1.54257	0.00988386				5.847	60.455	0.389978	17.5744					55.353	0.039	1.43245	0.0039659				47.466	0.05	1.22835	0.00508449
			17.303	0.032	2.46396	0.00676075				10.977	0.021	1.56313	0.00443674					18.918	0.039	1.26178	0.0113374				6.258	60.179	0.417391	17.4941					94.03	0.021	2.43336	0.00213549				8.465	55.338	0.219062	5.62731
			9.465	0.044	1.34782	0.00929603				8.239	0.03	1.17324	0.0063382					22.769	0.03	1.51863	0.00872105				3.047	25.637	0.203226	7.45272					80.073	0.019	2.07217	0.00193211				9.774	75.456	0.252937	7.67311
			14.533	0.038	2.06951	0.00802839				3.854	0.017	0.548813	0.00359165					25.551	0.043	1.70418	0.0125002				5.294	45.889	0.353095	13.34					44.062	48.252	1.14026	4.90674				53.63	0.047	1.38787	0.00477942
			14.24	0.041	2.02779	0.00866221				3.233	0.023	0.460382	0.00485929					17.362	0.042	1.158	0.0122095				8.42	0.191	0.56159	0.055524					67.694	0.024	1.75182	0.00244056				7.69	54.141	0.199006	5.50559
			14.646	0.033	2.0856	0.00697202				2.788	55.827	0.397014	11.7948					14.528	0.026	0.968976	0.00755825				2.879	24.447	0.192021	7.10679					69.085	0.032	1.78782	0.00325408				10.095	73.673	0.261244	7.4918
			7.1	0.039	1.01105	0.00823967				10.784	0.018	1.53565	0.00380292					4.158	0.027	0.277327	0.00784895				4.608	36.789	0.30734	10.6946					17.663	0.051	0.457092	0.00518618				10.081	69.696	0.260881	7.08738
			13.273	0.032	1.89009	0.00676075				4.064	0.021	0.578717	0.00443674					20.814	0.053	1.38823	0.0154072				5.743	56.78	0.383042	16.506					41.632	0.024	1.07737	0.00244056				6.696	39.418	0.173283	4.00841
			14.278	0.045	2.0332	0.00950731				4.581	0.027	0.652338	0.00570438					25.866	0.039	1.72519	0.0113374				4.522	40.865	0.301604	11.8795					35.997	0.023	0.931549	0.00233887				14.226	109.058	0.368148	11.0901
			15.482	0.041	2.20465	0.00866221				3.707	0.036	0.52788	0.00760584					21.288	0.021	1.41985	0.00610474				4.544	41.08	0.303072	11.942					70.247	0.034	1.81789	0.00345745				49.593	0.056	1.28339	0.00569463
			12.698	0.03	1.80821	0.0063382				10.295	0.03	1.46602	0.0063382					20.299	0.049	1.35389	0.0142444				3.252	25.231	0.216899	7.3347					51.577	0.029	1.33474	0.00294901				12.581	53.294	0.325578	5.41946
			1.567	0.035	0.223142	0.00739457				8.167	0.02	1.16299	0.00422547					20.055	0.034	1.33761	0.00988386				4.481	38.715	0.29887	11.2545					47.98	0.022	1.24165	0.00223718				14.611	65.294	0.378111	6.63974
			11.734	0.041	1.67093	0.00866221				4.55	0.052	0.647924	0.0109862					16.95	0.041	1.13052	0.0119188				5.889	63.462	0.392779	18.4485					59.96	0.031	1.55168	0.00315239				15.436	75.242	0.399461	7.65135
			10.579	0.037	1.50646	0.00781712				8.496	0.019	1.20984	0.0040142					15.965	0.019	1.06482	0.00552333				5.24	48.376	0.349493	14.063					54.62	0.02	1.41348	0.0020338				22.902	128.365	0.59267	13.0534
			6.121	0.038	0.871636	0.00802839				3.664	0.024	0.521757	0.00507056					17.422	0.031	1.162	0.00901176				9.496	0.053	0.633356	0.0154072					61.103	0.036	1.58126	0.00366083				17.714	74.596	0.458412	7.58566
			8.026	0.044	1.14291	0.00929603				8.624	0.023	1.22807	0.00485929					16.161	0.026	1.07789	0.00755825				5.382	55.236	0.358964	16.0572					31.244	0.08	0.808548	0.00813519				11.164	51.609	0.288908	5.24811
			15.289	0.037	2.17717	0.00781712				10.29	0.023	1.46531	0.00485929					21.085	0.034	1.40631	0.00988386				7.329	73.304	0.488823	21.3096					13.488	73.611	0.349049	7.48549				10.293	38.289	0.266368	3.8936
			10.589	0.026	1.50788	0.00549311				5.067	0.019	0.721545	0.0040142					19.103	0.043	1.27412	0.0125002				3.779	28.806	0.252049	8.37396					15.744	42.657	0.407431	4.33778				13.532	66.081	0.350188	6.71977
			5.681	0.039	0.808979	0.00823967				8.322	0.021	1.18506	0.00443674					14.721	0.049	0.981849	0.0142444				5.564	52.618	0.371103	15.2961					10.979	25.376	0.28412	2.58048				13.374	62.93	0.346099	6.39934
			13.887	0.038	1.97752	0.00802839				11.825	0.023	1.68389	0.00485929					23.648	0.024	1.57725	0.00697684				7.721	79.783	0.514969	23.1931					48.239	0.02	1.24835	0.0020338				17.95	77.014	0.464519	7.83154
			14.724	0.032	2.09671	0.00676075				15.157	0.02	2.15837	0.00422547					19.689	0.032	1.3132	0.00930246				6.536	62.732	0.435933	18.2363					45.928	0.035	1.18855	0.00355914				10.959	51.951	0.283603	5.28289
			5.116	0.037	0.728523	0.00781712				7.764	0.022	1.1056	0.00464802					17.563	0.029	1.1714	0.00843035				6.326	59.282	0.421926	17.2334					40.575	0.028	1.05002	0.00284732				12.413	59.569	0.32123	6.05756
			12.895	0.044	1.83626	0.00929603				11.683	0.018	1.66367	0.00380292					14.617	0.029	0.974912	0.00843035				5.876	60.118	0.391912	17.4764					12.201	87.435	0.315744	8.89125				12.152	55.249	0.314476	5.61826
			4.877	0.041	0.694489	0.00866221				6.251	0.02	0.890148	0.00422547					21.964	0.039	1.46494	0.0113374				3.057	22.365	0.203893	6.50155					58.749	0.044	1.52034	0.00447435				15.144	69.315	0.391904	7.04863
			8.153	0.034	1.16099	0.0071833				13.055	0.02	1.85904	0.00422547					22.937	0.038	1.52983	0.0110467				6.641	66.786	0.442936	19.4148					56.899	0.021	1.47246	0.00213549				19.468	80.822	0.503803	8.21878
			5.225	0.031	0.744045	0.00654948				9.071	0.024	1.29172	0.00507056					33.566	0.043	2.23876	0.0125002				5.913	61.481	0.39438	17.8726					12.313	44.886	0.318642	4.56445				10.063	43.917	0.260416	4.46591
			8.433	0.041	1.20087	0.00866221				4.99	0.017	0.71058	0.00359165					22.449	0.025	1.49728	0.00726755				3.356	26.248	0.223836	7.63034					57.004	0.04	1.47518	0.00406759				22.706	126.749	0.587598	12.8891
			8.082	0.038	1.15088	0.00802839				5.484	0.022	0.780926	0.00464802					18.943	0.045	1.26344	0.0130816				6.997	68.011	0.46668	19.7709					10.915	39.927	0.282464	4.06017				23.287	93.129	0.602633	9.47027
			2.862	0.028	0.407551	0.00591566				6.948	0.025	0.989401	0.00528184					33.969	0.036	2.26564	0.0104653				5.777	56.033	0.385309	16.2889					13.28	81.777	0.343667	8.31589				15.086	64.961	0.390403	6.60587
			9.527	0.036	1.35665	0.00760584				6.16	0.023	0.877189	0.00485929					21.28	0.036	1.41932	0.0104653				6.542	64.517	0.436333	18.7552					52.351	0.246	1.35477	0.0250157				16.968	66.592	0.439107	6.77173
			13.993	0.042	1.99262	0.00887349				4.612	0.026	0.656753	0.00549311					12.92	0.033	0.861727	0.00959316				7.259	67.819	0.484155	19.7151					8.64	47.483	0.22359	4.82854				11.305	42.773	0.292557	4.34958
			8.235	0.036	1.17267	0.00760584				2.257	0.018	0.321399	0.00380292					36.459	0.049	2.43171	0.0142444				9.519	101.332	0.63489	29.4574					17.503	36.438	0.452952	3.70537				13.645	61.091	0.353112	6.21233
			13.789	0.037	1.96357	0.00781712				10.467	0.025	1.49051	0.00528184					28.276	0.033	1.88593	0.00959316				4.475	38.576	0.29847	11.2141					37.895	0.1	0.980667	0.010169				8.115	32.488	0.210004	3.3037
			4.26	0.043	0.606628	0.00908476				11.877	0.023	1.6913	0.00485929					25.456	0.038	1.69784	0.0110467				5.095	47.895	0.339822	13.9232					58.399	0.03	1.51128	0.0030507				18.853	92.282	0.487888	9.38414
			4.906	0.033	0.698619	0.00697202				6.608	0.04	0.940985	0.00845094					24.892	0.035	1.66023	0.0101746				44.913	0.014	2.99557	0.00406983					40.734	0.869	1.05414	0.0883685				7.516	30.015	0.194503	3.05222
			15.28	0.04	2.17589	0.00845094				9.861	0.021	1.40422	0.00443674					24.576	0.043	1.63915	0.0125002				54.163	0.012	3.61252	0.00348842					34.413	0.101	0.890558	0.0102707				18.196	56.691	0.470886	5.7649
			6.055	0.041	0.862237	0.00866221				9.281	0.02	1.32162	0.00422547					16.961	0.039	1.13125	0.0113374				20.989	0.013	1.39991	0.00377912					18.932	27.773	0.489932	2.82423				14.04	62.339	0.363334	6.33924
			13.412	0.045	1.90988	0.00950731				11.643	0.025	1.65797	0.00528184					22.122	0.024	1.47547	0.00697684				27.699	0.015	1.84744	0.00436053					56.549	0.033	1.4634	0.00335577				15.566	73.934	0.402825	7.51834
			10.312	0.041	1.46844	0.00866221				4.145	0.02	0.590252	0.00422547					25.819	0.041	1.72205	0.0119188				40.739	0.015	2.71718	0.00436053					59.024	0.223	1.52745	0.0226768				18.401	91.47	0.476191	9.30157
			10.721	0.043	1.52668	0.00908476				17.138	0.028	2.44047	0.00591566					27.387	0.031	1.82663	0.00901176				24.154	0.015	1.611	0.00436053					25.338	0.171	0.65571	0.017389				15.163	71.06	0.392396	7.22608
			12.955	0.044	1.8448	0.00929603				7.523	0.017	1.07128	0.00359165					3.109	0.014	0.207361	0.00406983				5.473	57.498	0.365033	16.7148					41.958	0.066	1.08581	0.00671153				11.779	47.297	0.304823	4.80962
			11.225	0.044	1.59845	0.00929603				9.589	0.021	1.36548	0.00443674					31.223	0.039	2.08249	0.0113374				3.877	44.768	0.258585	13.0141					41.74	0.146	1.08017	0.0148467				13.121	50.497	0.339552	5.13503
			9.982	0.037	1.42145	0.00781712				4.645	0.024	0.661452	0.00507056					42.554	0.038	2.83823	0.0110467				6.821	38.889	0.454941	11.3051					12.262	29.174	0.317322	2.9667				14.609	63.924	0.378059	6.50042
			5.372	0.036	0.764978	0.00760584				13.258	0.022	1.88795	0.00464802					26.137	0.039	1.74326	0.0113374				53.263	0.016	3.55249	0.00465123					64.188	0.049	1.66109	0.0049828				16.396	83.067	0.424304	8.44707
			15.34	0.039	2.18443	0.00823967				3.268	0.021	0.465366	0.00443674					27.189	0.039	1.81343	0.0113374				43.176	0.013	2.87972	0.00377912					58.112	0.082	1.50385	0.00833857				16.955	77.648	0.43877	7.89601
			10.864	0.042	1.54704	0.00887349				9.901	0.03	1.40991	0.0063382					25.674	0.042	1.71238	0.0122095				42.397	0.012	2.82776	0.00348842					26.008	0.105	0.673049	0.0106774				18.283	81.6	0.473137	8.29789
			12.654	0.046	1.80194	0.00971858				4.817	0.046	0.685945	0.00971858					27.034	0.039	1.80309	0.0113374				31.898	0.016	2.12751	0.00465123					10.511	27.558	0.272009	2.80237				6.832	23.488	0.176802	2.38849
			10.085	0.039	1.43611	0.00823967				6.079	0.023	0.865655	0.00485929					13.579	0.024	0.905681	0.00697684				35.11	0.013	2.34174	0.00377912					43.375	0.3	1.12248	0.030507				12.619	56.486	0.326561	5.74405
			5.287	0.043	0.752873	0.00908476				4.489	0.028	0.639238	0.00591566					25.678	0.032	1.71265	0.00930246				34.297	4.101	2.28751	1.19217					55.458	0.052	1.43517	0.00528787				19.289	91.709	0.499171	9.32587
			7.724	0.039	1.0999	0.00823967				9.291	0.024	1.32305	0.00507056					20.718	0.045	1.38183	0.0130816				28.236	0.015	1.88326	0.00436053					47.853	0.044	1.23836	0.00447435				28.23	118.195	0.730551	12.0192
			13.513	0.035	1.92426	0.00739457				6.288	0.026	0.895417	0.00549311					17.77	0.04	1.18521	0.0116281				22.145	0.013	1.47701	0.00377912					22.759	32.37	0.588969	3.2917				7.459	25.387	0.193028	2.5816
			7.128	0.041	1.01503	0.00866221				2.991	0.021	0.425921	0.00443674					31.064	0.045	2.07188	0.0130816				4.494	45.376	0.299737	13.1909					31.551	0.023	0.816493	0.00233887				13.361	62.179	0.345763	6.32297
			0.541	0.04	0.0770389	0.00845094				12.371	0.026	1.76164	0.00549311					30.046	0.041	2.00398	0.0119188				50.564	0.022	3.37247	0.00639544					49.345	0.024	1.27698	0.00244056				14.184	64.159	0.367061	6.52432
			2.296	0.042	0.326952	0.00887349				10.744	0.022	1.52996	0.00464802					23.965	0.032	1.5984	0.00930246				36.574	0.014	2.43938	0.00406983					40.367	0.027	1.04464	0.00274563				13.249	74.349	0.342865	7.56054
			11.56	0.039	1.64615	0.00823967				8.4	0.026	1.19617	0.00549311					24.317	0.026	1.62187	0.00755825				4.768	47.751	0.318012	13.8813					43.703	0.029	1.13097	0.00294901				22.763	112.055	0.589073	11.3949
			14.929	0.042	2.1259	0.00887349				5.505	0.026	0.783917	0.00549311					24.131	0.05	1.60947	0.0145351				20.6	0.015	1.37396	0.00436053					53.433	0.091	1.38277	0.00925378				9.444	47.182	0.244397	4.79793
			8.007	0.042	1.1402	0.00887349				20.8	0.03	2.96194	0.0063382					27.54	0.039	1.83684	0.0113374				31.181	0.011	2.07968	0.00319772					67.393	0.054	1.74403	0.00549125				16.453	86.027	0.425779	8.74807
			8.911	0.041	1.26893	0.00866221				4.735	0.027	0.674268	0.00570438					21.92	0.047	1.462	0.013663				4.861	0.08	0.324215	0.0232561					47.296	0.109	1.22395	0.0110842				19.07	118.003	0.493503	11.9997
			2.74	0.078	0.390178	0.0164793				5.564	0.026	0.792318	0.00549311					15.273	0.021	1.01867	0.00610474				39.885	0.027	2.66022	0.00784895					97.784	0.093	2.53051	0.00945716				5.29	15.897	0.136897	1.61656
			5.233	0.043	0.745184	0.00908476				4.661	0.029	0.66373	0.00612693					27.069	0.017	1.80543	0.00494193				49.277	0.014	3.28664	0.00406983					39.469	0.033	1.0214	0.00335577				17.924	100.688	0.463847	10.2389
			1.157	11.247	0.164758	2.37619				9.155	0.022	1.30368	0.00464802					22.774	0.024	1.51896	0.00697684				6.577	63.204	0.438667	18.3735					59.893	0.056	1.54994	0.00569463				15.57	89.63	0.402929	9.11446
			4.039	71.359	0.575157	15.0763				11.649	0.026	1.65883	0.00549311					23.65	0.047	1.57739	0.013663				30.136	0.016	2.00999	0.00465123					73.453	0.033	1.90085	0.00335577				16.924	90.347	0.437968	9.18737
			7.823	0.046	1.114	0.00971858				9.942	0.022	1.41575	0.00464802					23.262	0.032	1.55151	0.00930246				9.402	0.014	0.627087	0.00406983					69.669	0.022	1.80293	0.00223718				14.815	69.957	0.38339	7.11392
			2.507	0.037	0.356999	0.00781712				9.425	0.026	1.34213	0.00549311					33.048	0.053	2.20421	0.0154072				53.393	0.186	3.56116	0.0540705					62.137	0.024	1.60801	0.00244056				15.408	60.337	0.398736	6.13566
			2.771	0.048	0.394593	0.0101411				13.69	0.026	1.94947	0.00549311					28.191	0.044	1.88026	0.0127909				4.912	56.001	0.327616	16.2796					57.594	0.122	1.49045	0.0124062				12.124	55.776	0.313751	5.67185
			2.238	0.034	0.318693	0.0071833				7.963	0.029	1.13394	0.00612693					29.102	0.023	1.94102	0.00668614				30.174	0.011	2.01252	0.00319772					78.676	0.033	2.03602	0.00335577				15.262	69.742	0.394958	7.09205
			3.885	0.042	0.553227	0.00887349				8.949	0.029	1.27435	0.00612693					25.578	0.038	1.70598	0.0110467				2.952	0.441	0.19689	0.1282					46.659	0.333	1.20747	0.0338627				14.354	75.968	0.37146	7.72517
			9.977	0.039	1.42073	0.00823967				4.75	0.029	0.676404	0.00612693					33.253	0.04	2.21788	0.0116281				8.643	0.014	0.576463	0.00406983					69.268	0.039	1.79255	0.0039659				17.658	111.391	0.456963	11.3273
			5.164	0.051	0.735358	0.0107749				5.627	0.023	0.80129	0.00485929					24.843	0.06	1.65696	0.0174421				42.267	0.017	2.81909	0.00494193					41.8	0.023	1.08172	0.00233887				10.267	25.194	0.265695	2.56197
			1.041	0.046	0.148239	0.00971858				3.301	0.038	0.470065	0.00802839					26.636	0.046	1.77655	0.0133723				6.04	57.968	0.402851	16.8514					15.154	79.816	0.392163	8.11648				11.26	56.224	0.291392	5.71741
			15.135	0.039	2.15524	0.00823967				3.387	0.025	0.482312	0.00528184					37.016	0.043	2.46886	0.0125002				3.631	29.725	0.242177	8.64111					78.593	0.022	2.03387	0.00223718				24.203	40.605	0.626338	4.12912
			0.412	0.168	0.0586692	0.0354939				6.689	0.024	0.952519	0.00507056					26.289	0.174	1.7534	0.0505821				30.296	0.012	2.02066	0.00348842					92.092	0.021	2.3832	0.00213549				16.389	67.689	0.424123	6.88328
			3.889	0.037	0.553797	0.00781712				6.179	0.024	0.879895	0.00507056					28.427	0.043	1.896	0.0125002				24.035	0.027	1.60307	0.00784895					9.268	18.135	0.239842	1.84415				14.402	74.078	0.372702	7.53298
			5.875	0.04	0.836605	0.00845094				9.098	0.03	1.29556	0.0063382					38.89	0.038	2.59385	0.0110467				33.616	0.011	2.24209	0.00319772					77.382	0.213	2.00253	0.0216599				7.086	27.348	0.183375	2.78101
			16.744	0.039	2.38436	0.00823967				10.334	0.073	1.47157	0.015423					43.269	0.033	2.88592	0.00959316				6.457	49.744	0.430663	14.4607					54.165	0.019	1.40171	0.00193211				10.359	38.549	0.268076	3.92004
			1.666	0.091	0.23724	0.0192259				6.896	0.026	0.981996	0.00549311					21.552	0.028	1.43746	0.00813965				24.739	14.218	1.65002	4.1332					54.915	0.032	1.42112	0.00325408				11.367	50.055	0.294161	5.09009
			13.871	0.046	1.97524	0.00971858				10.24	0.034	1.45818	0.0071833					33.063	0.039	2.20521	0.0113374				5.232	52.457	0.348959	15.2493					39.966	0.043	1.03426	0.00437266				13.505	76.198	0.349489	7.74856
			7.407	0.034	1.05476	0.0071833				4.909	0.042	0.699046	0.00887349					37.942	0.041	2.53062	0.0119188				4.542	41.682	0.302938	12.117					61.002	0.03	1.57864	0.0030507				4.932	24.876	0.127633	2.52964
			0.821	0.114	0.116911	0.0240852				3.133	0.034	0.446142	0.0071833					35.62	0.038	2.37575	0.0110467				32.62	0.087	2.17566	0.0252911					85.027	0.029	2.20037	0.00294901				8.176	46.286	0.211583	4.70682
			6.997	0.044	0.996379	0.00929603				8.875	0.095	1.26381	0.020071					28.777	0.031	1.91934	0.00901176				7.761	57.314	0.517637	16.6613					16.582	99.32	0.429118	10.0998				9.617	70.507	0.248874	7.16985
			3.178	0.04	0.45255	0.00845094				5.135	0.025	0.731229	0.00528184					15.757	0.037	1.05095	0.010756				8.599	64.096	0.573529	18.6328					25.408	50.585	0.657521	5.14398				2.667	0.099	0.069018	0.0100673
			0.892	10.859	0.127022	2.29422				2.603	0.032	0.370669	0.00676075					30.482	0.039	2.03306	0.0113374				49.805	0.018	3.32185	0.00523263					23.347	46.923	0.604186	4.77159				7.259	49.693	0.187852	5.05327
			4.543	0.037	0.646927	0.00781712				5.721	0.039	0.814675	0.00823967					28.846	0.033	1.92395	0.00959316				13.978	0.949	0.932293	0.275876					117.506	0.04	3.04088	0.00406759				3.408	8.647	0.088194	0.879312
			0.874	0.044	0.124458	0.00929603				1.75	0.036	0.249202	0.00760584					27.304	0.051	1.8211	0.0148258				6.386	69.802	0.425928	20.2916					131.516	0.023	3.40344	0.00233887				8.132	54.251	0.210444	5.51678
			10.674	0.04	1.51999	0.00845094				9.439	0.034	1.34412	0.0071833					33.1	0.035	2.20768	0.0101746				5.878	65.77	0.392046	19.1195					4.91	0.021	0.127064	0.00213549				3.697	0.064	0.0956729	0.00650815
			2.302	0.042	0.327807	0.00887349				6.99	0.035	0.995382	0.00739457					32.116	0.033	2.14205	0.00959316				31.719	0.017	2.11557	0.00494193					142.953	0.042	3.69941	0.00427097				3.19	5.785	0.0825525	0.588276
			0.29	0.038	0.0412963	0.00802839												31.928	0.047	2.12951	0.013663				7.747	99.045	0.516703	28.7926					134.14	0.018	3.47134	0.00183042				11.342	85.035	0.293514	8.6472
			8.692	0.033	1.23775	0.00697202												34.334	0.049	2.28998	0.0142444				6.778	0.437	0.452073	0.127037					170.088	0.017	4.40163	0.00172873				2.489	0.326	0.0644116	0.0331509
			3.234	0.041	0.460524	0.00866221												31.774	0.068	2.11924	0.0197677				31.34	0.037	2.09029	0.010756					125.382	0.021	3.2447	0.00213549				7.089	45.685	0.183453	4.6457
			2.429	17.302	0.345892	3.65545												49.019	0.039	3.26943	0.0113374				7.404	76.903	0.493826	22.3558					113.083	0.024	2.92642	0.00244056				9.283	60.701	0.24023	6.17268
			10.845	0.041	1.54434	0.00866221												31.871	0.048	2.1257	0.0139537				5.447	62.305	0.363299	18.1122					103.41	0.02	2.6761	0.0020338				2.448	0.272	0.0633506	0.0276596
			1.744	19.564	0.248347	4.13335												25.452	0.035	1.69758	0.0101746				6.704	64.723	0.447138	18.8151					145.583	0.02	3.76747	0.0020338				9.473	61.167	0.245147	6.22006
			0.322	0.047	0.0458531	0.00992985												29.903	0.035	1.99444	0.0101746				38.996	0.017	2.60092	0.00494193					121.585	0.024	3.14644	0.00244056				12.03	86.445	0.311319	8.79058
			2.063	0.039	0.293773	0.00823967												32.573	0.041	2.17253	0.0119188				4.688	42.066	0.312676	12.2287					162.428	0.018	4.2034	0.00183042				14.061	107.386	0.363878	10.9201
			9.914	0.04	1.41176	0.00845094												24.727	0.034	1.64922	0.00988386				9.596	81.008	0.640026	23.5492					134.02	0.03	3.46824	0.0030507				10.351	66.322	0.267869	6.74427
			0.335	0.042	0.0477043	0.00887349												16.372	0.042	1.09197	0.0122095				11.576	24.998	0.772086	7.26696					106.83	0.019	2.7646	0.00193211				11.835	78.753	0.306272	8.00838
			3.321	0.04	0.472913	0.00845094												34.108	0.043	2.27491	0.0125002				7.057	75.468	0.470682	21.9387					69.61	0.032	1.8014	0.00325408				11.645	77.396	0.301355	7.87039
			0.328	0.058	0.0467075	0.0122539												35.144	0.036	2.344	0.0104653				4.254	43.163	0.28373	12.5476					107.703	0.031	2.78719	0.00315239				8.423	55.368	0.217975	5.63036
			1.835	22.208	0.261306	4.69196												26.401	0.038	1.76087	0.0110467				4.545	43.131	0.303139	12.5383					116.307	0.023	3.00985	0.00233887				11.129	76.236	0.288002	7.75243
			6.922	0.043	0.985699	0.00908476												38.058	0.045	2.53836	0.0130816				4.307	38.933	0.287265	11.3179					145.781	0.025	3.7726	0.00254225				6.714	37.033	0.173748	3.76588
			2.278	0.052	0.324389	0.0109862												37.791	0.041	2.52055	0.0119188				4.227	42.904	0.281929	12.4723					173.794	0.023	4.49753	0.00233887				10.416	53.281	0.269551	5.41814
			1.599	0.046	0.227699	0.00971858												25.607	0.078	1.70791	0.0226747				7.053	78.845	0.470415	22.9204					160.312	0.019	4.14864	0.00193211				7.429	41.757	0.192252	4.24626
			0.386	0.118	0.0549667	0.0249303												28.322	0.023	1.889	0.00668614				4.554	41.403	0.303739	12.0359					129.094	0.032	3.34076	0.00325408				8.206	48.127	0.212359	4.89403
			5.984	0.046	0.852127	0.00971858												29.677	0.036	1.97937	0.0104653				5.304	58.5	0.353762	17.0061					116.228	0.023	3.00781	0.00233887				9.444	51.753	0.244397	5.26275
			2.71	0.042	0.385906	0.00887349												12.508	0.023	0.834248	0.00668614				5.481	56.829	0.365567	16.5203					135.927	0.022	3.51759	0.00223718				7.55	38.757	0.195383	3.94119
			5.057	0.062	0.720121	0.013099												34.206	0.048	2.28144	0.0139537				2.783	17.807	0.185618	5.17653					137.298	0.015	3.55307	0.00152535				12.055	88.519	0.311966	9.00148
			1.421	29.95	0.202352	6.32764												33.615	0.035	2.24202	0.0101746				5.174	40.372	0.345091	11.7362					156.221	0.015	4.04277	0.00152535				2.754	0.05	0.0712694	0.00508449
			4.327	0.048	0.616169	0.0101411												37.21	0.032	2.4818	0.00930246				5.453	56.322	0.3637	16.3729					109.251	0.025	2.82725	0.00254225				11.157	76.999	0.288727	7.83002
			2.362	30.409	0.336351	6.42461												42.417	0.04	2.82909	0.0116281				8.298	49.302	0.553453	14.3322					153.631	0.026	3.97574	0.00264394				6.395	35.484	0.165493	3.60836
			1.014	0.163	0.144394	0.0344376												41.311	0.036	2.75533	0.0104653				5.584	46.928	0.372437	13.6421					142.715	0.019	3.69325	0.00193211				7.142	42.131	0.184824	4.2843
			6.286	0.048	0.895132	0.0101411												34.708	0.045	2.31492	0.0130816				4.923	37.596	0.32835	10.9292					167.186	0.022	4.32653	0.00223718				2.125	3.223	0.0549919	0.327746
			1.376	0.045	0.195944	0.00950731												27.162	0.047	1.81163	0.013663				5.61	59.929	0.374171	17.4215					142.297	0.022	3.68244	0.00223718				10.867	76.386	0.281222	7.76768
			0.4	0.053	0.0569604	0.0111975												36.038	0.037	2.40363	0.010756				5.81	60.303	0.38751	17.5302					142.148	0.021	3.67858	0.00213549				6.286	32.894	0.162672	3.34499
			1.446	0.045	0.205912	0.00950731												36.838	0.043	2.45699	0.0125002				6.325	61.576	0.421859	17.9003					130.768	0.02	3.38408	0.0020338				2.41	2.916	0.0623672	0.296528
			6.274	0.046	0.893423	0.00971858												29.962	0.042	1.99838	0.0122095				4.899	56.084	0.326749	16.3037					139.008	0.029	3.59732	0.00294901				2.314	3.064	0.0598829	0.311578
			0.424	0.061	0.060378	0.0128877												22.768	0.038	1.51856	0.0110467				4.019	32.224	0.268056	9.36758					76.149	0.022	1.97062	0.00223718				11.11	68.067	0.28751	6.92172
			2.204	16.812	0.313852	3.55193												43.592	0.03	2.90746	0.00872105				5.718	59.371	0.381374	17.2593					133.088	0.03	3.44412	0.0030507				1.901	1.622	0.0491951	0.164941
			0.365	0.054	0.0519763	0.0114088												26.214	0.016	1.7484	0.00465123				5.905	61.192	0.393847	17.7886					106.8	0.027	2.76383	0.00274563				6.634	31.408	0.171678	3.19387
			0.337	0.04	0.0479891	0.00845094												27.245	0.039	1.81716	0.0113374				5.568	51.456	0.37137	14.9584					140.577	0.023	3.63792	0.00233887				6.511	34.581	0.168495	3.51654
			2.333	25.121	0.332221	5.3074												21.106	0.036	1.40771	0.0104653				6.162	63.917	0.410988	18.5808					99.914	0.032	2.58563	0.00325408				12.986	81.688	0.336058	8.30684
			2.59	0.059	0.368818	0.0124651												40.111	0.03	2.67529	0.00872105				4.411	40.933	0.294201	11.8993					113.784	0.029	2.94456	0.00294901				9.402	52.701	0.24331	5.35916
			2.404	0.043	0.342332	0.00908476												32.369	0.037	2.15892	0.010756				4.749	50.854	0.316745	14.7834					177.819	0.028	4.60169	0.00284732				7.267	35.086	0.188059	3.56789
			0.379	0.054	0.0539699	0.0114088												32.011	0.043	2.13504	0.0125002				4.918	56.91	0.328017	16.5438					113.238	0.026	2.93043	0.00264394				7.22	36.48	0.186843	3.70965
			1.242	22.764	0.176862	4.80943												20.853	0.046	1.39084	0.0133723				3.096	26.17	0.206494	7.60767					132.274	0.027	3.42306	0.00274563				5.366	27.435	0.138864	2.78986
			2.194	10.701	0.312428	2.26084												34.72	0.038	2.31572	0.0110467				5.173	48.075	0.345024	13.9755					130.257	0.034	3.37086	0.00345745				9.258	46.59	0.239583	4.73773
			0.394	0.066	0.0561059	0.013944												31.563	0.045	2.10516	0.0130816				9.295	71.472	0.61995	20.777					100.303	0.029	2.59569	0.00294901				5.697	24.18	0.14743	2.45886
			0.96	0.05	0.136705	0.0105637												21.836	0.027	1.4564	0.00784895				8.866	114.23	0.591337	33.2069					169.674	0.019	4.39091	0.00193211				7.848	41.71	0.203095	4.24148
			0.687	0.052	0.0978294	0.0109862												29.418	0.045	1.9621	0.0130816				3.398	26.127	0.226637	7.59517					162.409	0.017	4.2029	0.00172873				9.866	55.786	0.255317	5.67287
			1.916	42.326	0.27284	8.94236												16.676	0.04	1.11224	0.0116281				37.352	0.015	2.49127	0.00436053					167.449	0.027	4.33333	0.00274563				6.935	36.655	0.179468	3.72744
			0.328	0.049	0.0467075	0.0103524												35.603	0.041	2.37462	0.0119188				5.386	30.228	0.359231	8.78733					68.7	0.018	1.77785	0.00183042				7.531	36.92	0.194891	3.75439
			1.931	23.426	0.274976	4.94929												12.555	0.039	0.837383	0.0113374				11.892	0.017	0.793162	0.00494193					175.16	0.03	4.53288	0.0030507				10.761	58.503	0.278479	5.94916
			0.38	0.25	0.0541123	0.0528184												34.887	0.031	2.32686	0.00901176				21.102	0.017	1.40744	0.00494193					171.381	0.019	4.43509	0.00193211				15.939	95.938	0.412478	9.75592
			1.92	25.579	0.27341	5.40416												26.659	0.033	1.77808	0.00959316				12.938	12.78	0.862928	3.71517					122.459	0.02	3.16906	0.0020338				3.493	13.101	0.0903937	1.33224
			0.403	0.409	0.0573876	0.0864108												27.548	0.025	1.83737	0.00726755				4.582	39.151	0.305606	11.3813					123.726	0.024	3.20185	0.00244056				6.713	31.582	0.173723	3.21157
			0.397	0.065	0.0565331	0.0137328												29.527	0.054	1.96937	0.0156979				29.537	0.019	1.97003	0.00552333					29.167	178.601	0.754799	18.1619				17.296	102.361	0.447595	10.4091
			1.951	34.748	0.277824	7.34133												38.001	0.039	2.53456	0.0113374				7.433	17.653	0.49576	5.13176					143.393	0.032	3.7108	0.00325408				13.163	77.426	0.340639	7.87344
			1.538	23.327	0.219013	4.92838												27.231	0.045	1.81623	0.0130816				37.162	0.014	2.4786	0.00406983					157.439	0.021	4.07429	0.00213549				9.783	50.401	0.25317	5.12527
			2.91	53.584	0.414387	11.3209												23.45	0.043	1.56405	0.0125002				5.788	66.141	0.386043	19.2273					184.634	0.029	4.77805	0.00294901				12.862	74.212	0.33285	7.54661
			2.716	47.814	0.386761	10.1018												35.122	0.04	2.34254	0.0116281				8.383	70.181	0.559122	20.4017					142.856	0.027	3.6969	0.00274563				15.665	100.969	0.405387	10.2675
			1.852	28.732	0.263726	6.07031												34.581	0.031	2.30645	0.00901176				31.12	2.064	2.07562	0.600009					130.367	0.017	3.37371	0.00172873				13.146	79.024	0.340199	8.03594
			1.944	27.754	0.276827	5.86368												23.596	0.026	1.57379	0.00755825				4.167	34.712	0.277927	10.0908					146.352	0.021	3.78737	0.00213549				16.03	88.936	0.414833	9.04389
			2.778	50.941	0.39559	10.7625												29.835	0.033	1.98991	0.00959316				9.57	0.787	0.638292	0.228782					90.481	0.025	2.34151	0.00254225				16.373	109.285	0.423709	11.1132
			2.267	42.487	0.322823	8.97638												29.444	0.023	1.96383	0.00668614				32.625	0.012	2.17599	0.00348842					164.936	0.023	4.2683	0.00233887				14.026	77.687	0.362972	7.89998
			2.888	54.288	0.411254	11.4696												33.738	0.027	2.25023	0.00784895				8.515	41.312	0.567926	12.0095					119.155	0.026	3.08356	0.00264394				10.167	24.786	0.263107	2.52048
			1.736	34.313	0.247208	7.24943												29.929	0.038	1.99618	0.0110467				20.858	7.23	1.39117	2.10177					126.778	0.027	3.28083	0.00274563				9.796	45.203	0.253506	4.59669
			1.616	32.675	0.23012	6.90336												17.707	0.033	1.18101	0.00959316				9.641	9.002	0.643027	2.6169					76.597	0.028	1.98222	0.00284732				4.622	19.52	0.119611	1.98499
			1.364	20.005	0.194235	4.22653												29.933	0.036	1.99645	0.0104653				4.439	49.49	0.296069	14.3868					118.507	0.022	3.06679	0.00223718				15.428	92.084	0.399254	9.36401
			1.601	31.924	0.227984	6.74469												29.431	0.048	1.96296	0.0139537				9.017	0.386	0.601408	0.112211					127.719	0.027	3.30518	0.00274563				14.029	90.341	0.36305	9.18676
			1.929	39.463	0.274691	8.33748												31.226	0.04	2.08269	0.0116281				7.158	59.891	0.477418	17.4104					132.027	0.016	3.41666	0.00162704				24.175	129.443	0.625613	13.163
			2.455	49.866	0.349594	10.5354												29.804	0.041	1.98784	0.0119188				3.767	36.147	0.251248	10.508					11.911	76.876	0.308239	7.81751				4.043	16.767	0.104627	1.70503
			1.63	25.326	0.232113	5.35071												29.464	0.018	1.96516	0.00523263				59.033	0.01	3.93733	0.00290702					9.015	34.227	0.233295	3.48054				16.537	54.886	0.427953	5.58135
			2.275	39.717	0.323962	8.39115												30.72	0.032	2.04894	0.00930246				17.365	6.017	1.1582	1.74915					10.226	52.213	0.264634	5.30953				16.466	100.666	0.426116	10.2367
			2.042	41.112	0.290783	8.68587												14.753	0.057	0.983983	0.01657				3.567	33.362	0.237909	9.69839					11.479	88.795	0.29706	9.02955				9.692	63.246	0.250815	6.43148
			1.985	36.932	0.282666	7.80275												31.563	0.028	2.10516	0.00813965				3.714	36.746	0.247713	10.6821					12.014	46.414	0.310905	4.71983				14.387	93.287	0.372314	9.48634
			2.987	49.383	0.425351	10.4333												24.168	0.016	1.61194	0.00465123				32.924	4.529	2.19594	1.31659					2.966	0.034	0.0767557	0.00345745				11.831	66.538	0.306169	6.76624
			2.098	48.534	0.298757	10.2539												18.871	0.044	1.25864	0.0127909				6.069	65.914	0.404785	19.1613					3.086	0.332	0.0798611	0.033761				14.258	93.19	0.368976	9.47648
			2.015	44.202	0.286938	9.33871												31.341	0.035	2.09036	0.0101746				72.981	0.018	4.86762	0.00523263					9.37	59.876	0.242482	6.08878				16.71	104.141	0.43243	10.5901
			2.081	48.546	0.296336	10.2565												20.797	0.029	1.3871	0.00843035				12.043	0.511	0.803234	0.148549					17.289	104.895	0.447414	10.6668				8.351	45.301	0.216112	4.60665
			0.405	0.035	0.0576724	0.00739457												30.353	0.056	2.02446	0.0162793				5.069	52.493	0.338088	15.2598					13.08	60.296	0.338491	6.13149				12.279	76.08	0.317762	7.73656
																		29.556	0.036	1.9713	0.0104653				7.307	0.028	0.487356	0.00813965					7.192	49.002	0.186118	4.98301				15.671	107.444	0.405542	10.926
																		27.017	0.023	1.80196	0.00668614				8.778	0.024	0.585468	0.00697684					10.919	76.737	0.282568	7.80337				9.111	52.032	0.235779	5.29113
																		27.686	0.042	1.84658	0.0122095				12.593	0.603	0.839917	0.175293					10.204	73.609	0.264064	7.48529				13.758	74.455	0.356037	7.57132
																		26.993	0.034	1.80036	0.00988386				16.106	0.021	1.07422	0.00610474					10.877	76.77	0.281481	7.80673				19.3	79.515	0.499455	8.08587
																		25.464	0.03	1.69838	0.00872105				38.773	0.018	2.58605	0.00523263					14.148	104.813	0.366129	10.6584				19.068	81.931	0.493452	8.33155
																		20.407	0.031	1.36109	0.00901176				7.747	0.017	0.516703	0.00494193					14.691	117.548	0.380181	11.9534				24.806	165.052	0.641943	16.7841
																		34.308	0.044	2.28825	0.0127909				46.701	0.023	3.11482	0.00668614					2.772	0.048	0.0717353	0.00488111				16.035	85.173	0.414962	8.66123
																		23.014	0.023	1.53497	0.00668614				5.062	49.693	0.337621	14.4458					2.843	0.053	0.0735726	0.00538956				15.854	93.88	0.410278	9.54664
																		34.87	0.033	2.32573	0.00959316				46.265	0.018	3.08574	0.00523263					15.398	94.626	0.398477	9.6225				15.404	89.294	0.398633	9.08029
																		21.382	0.03	1.42612	0.00872105				11.091	5.232	0.739738	1.52095					11.489	87.465	0.297318	8.8943				16.316	84.845	0.422234	8.62788
																		28.317	0.097	1.88866	0.0281981				45.788	0.007	3.05393	0.00203491					33.813	62.619	0.87503	6.36772				11.722	54.483	0.303348	5.54037
																		16.19	0.057	1.07983	0.01657				11.631	6.653	0.775755	1.93404					17.549	136.356	0.454142	13.866				12.885	78.472	0.333445	7.97981
																		22.313	0.035	1.48821	0.0101746				33.228	0.019	2.21621	0.00552333					5.356	0.563	0.138605	0.0572514				12.251	56.145	0.317038	5.70938
																		18.641	0.031	1.2433	0.00901176				7.704	85.932	0.513835	24.9806					9.994	75.729	0.25863	7.70087				7.685	36.641	0.198876	3.72602
																		18.452	0.032	1.2307	0.00930246				14.153	0.08	0.943965	0.0232561					11.322	81.577	0.292997	8.29555
																		20.778	0.047	1.38583	0.013663				33.656	0.014	2.24476	0.00406983					10.155	75.775	0.262796	7.70555
																		30.405	0.036	2.02793	0.0104653				18.354	5.324	1.22416	1.5477					8.012	40.851	0.207339	4.15413
																		34.6	0.038	2.30772	0.0110467				10.34	12.371	0.689648	3.59627					2.581	0.112	0.0667925	0.0113893
																		30.362	0.022	2.02506	0.00639544				7.761	86.444	0.517637	25.1294					1.72	0.034	0.0445111	0.00345745
																		31.897	0.022	2.12744	0.00639544				8.001	0.081	0.533644	0.0235468					9.363	64.566	0.242301	6.56571
																		35.319	0.023	2.35568	0.00668614				30.095	0.014	2.00725	0.00406983					2.308	0.03	0.0597276	0.0030507
																		37.664	0.031	2.51208	0.00901176				6.267	49.497	0.417991	14.3889					13.889	110.91	0.359427	11.2784
																		31.154	0.027	2.07788	0.00784895				33.252	0.017	2.21781	0.00494193					2.538	0.073	0.0656797	0.00742336
																		17.316	0.573	1.15493	0.166572				3.068	23.72	0.204627	6.89545					8.516	58.607	0.220381	5.95974
																		11.761	0.009	0.784425	0.00261632				20.845	13.575	1.3903	3.94628					6.383	37.769	0.165183	3.84072
																		15.048	0.075	1.00366	0.0218026				6.95	75.052	0.463545	21.8178					2.129	0.037	0.0550954	0.00376252
																		6.983	0.247	0.465746	0.0718034				36.067	0.019	2.40557	0.00552333					8.919	57.563	0.230811	5.85357
																		6.821	0.054	0.454941	0.0156979				4.454	37.846	0.297069	11.0019					6.953	44.614	0.179933	4.53679
																		4.95	0.034	0.330151	0.00988386				2.942	19.429	0.196223	5.64805					12.44	86.671	0.321929	8.81356
																		78.721	13.855	5.25047	4.02767				32.236	0.019	2.15005	0.00552333					2.189	0.022	0.0566481	0.00223718
																		68.89	8.8	4.59477	2.55818				7.281	65.191	0.485622	18.9511					9.08	55.194	0.234977	5.61267
																		52.432	6.682	3.49706	1.94247				3.857	37.538	0.257251	10.9124					2.952	0.038	0.0763934	0.00386421
																		73.225	10.14	4.8839	2.94772				2.99	21.924	0.199424	6.37335					2.377	0.625	0.0615132	0.0635562
																		25.226	2.578	1.6825	0.749429				8.889	14.151	0.592871	4.11372					2.611	5.084	0.0675688	0.516991
																		3.268	0.103	0.217966	0.0299423				7.291	62.524	0.486289	18.1758					4.284	21.561	0.110864	2.19253
																		4.728	0.042	0.315344	0.0122095				8.51	41.185	0.567593	11.9726					5.293	21.337	0.136975	2.16976
																		6.886	0.17	0.459277	0.0494193				4.915	53.594	0.327816	15.5799					2.336	0.493	0.0604522	0.0501331
																		6.626	0.055	0.441935	0.0159886				7.652	67.392	0.510367	19.591					2.831	0.554	0.0732621	0.0563362
																		6.638	0.072	0.442736	0.0209305				9.135	14.49	0.609278	4.21227					5.574	0.642	0.144247	0.0652849
																		10.138	0.089	0.676176	0.0258725				1.573	0.016	0.104915	0.00465123					4.385	0.163	0.113477	0.0165754
																		7.724	0.068	0.515169	0.0197677				10.059	32.506	0.670907	9.44955					3.027	0.041	0.0783343	0.00416928
																		51.095	7.874	3.40789	2.28899				5.507	39.392	0.367301	11.4513					2.404	0.069	0.062212	0.0070166
																		3.85	0.038	0.256784	0.0110467				8.282	83.677	0.552386	24.3251					2.723	0.033	0.0704672	0.00335577
																		6.56	0.111	0.437533	0.0322679				6.142	38.452	0.409654	11.1781					4.245	0.238	0.109854	0.0242022
																		8.407	0.077	0.560723	0.022384				7.374	72.509	0.491825	21.0785					3.897	0.123	0.100849	0.0125079
																		7.98	0.089	0.532243	0.0258725				4.974	50.34	0.331752	14.6339					1.857	0.168	0.0480564	0.0170839
																		8.252	0.063	0.550385	0.0183142				5.799	64.876	0.386777	18.8596					2.657	0.76	0.0687592	0.0772843
																		2.159	0.047	0.143999	0.013663				11.015	39.758	0.734669	11.5577					3.21	0.115	0.0830701	0.0116943
																		8.223	0.072	0.548451	0.0209305				6.796	68.706	0.453274	19.973					11.873	70.604	0.307256	7.17971
																		8.369	0.084	0.558188	0.024419				6.182	65.149	0.412322	18.9389					2.228	0.033	0.0576573	0.00335577
																		7.283	0.051	0.485755	0.0148258				4.177	41.333	0.278594	12.0156					3.397	0.074	0.0879093	0.00752505
																		8.46	0.103	0.564258	0.0299423				9.891	101.715	0.659701	29.5687					3.416	0.083	0.088401	0.00844026
																		6.14	0.063	0.40952	0.0183142				7.833	73.408	0.522439	21.3398					2.743	0.162	0.0709848	0.0164738
																		46.29	6.334	3.08741	1.84131				5.566	30.606	0.371236	8.89722					1.985	0.112	0.0513689	0.0113893
																		6.139	0.055	0.409454	0.0159886				6.754	67.718	0.450473	19.6857					2.22	0.033	0.0574503	0.00335577
																		8.471	0.07	0.564992	0.0203491				7.593	80.166	0.506431	23.3044					2.122	0.048	0.0549142	0.00488111
																		8.586	0.076	0.572662	0.0220933				4.365	41.691	0.291133	12.1196					3.047	0.033	0.0788519	0.00335577
																		7.052	0.054	0.470348	0.0156979				4.955	47.146	0.330484	13.7054					4.777	0.03	0.123622	0.0030507
																		6.69	0.044	0.446204	0.0127909				5.149	45.725	0.343424	13.2923					4.181	0.063	0.108198	0.00640646
																		7.279	0.05	0.485489	0.0145351				7.621	67.652	0.508299	19.6666					3.024	0.074	0.0782566	0.00752505
																		6.958	0.051	0.464079	0.0148258				4.337	28.717	0.289266	8.34808					1.927	0.034	0.0498679	0.00345745
																		7.872	0.052	0.52504	0.0151165				13.721	147.125	0.915152	42.7695					2.91	0.041	0.0753065	0.00416928
																		58.819	9.908	3.92306	2.88027				4.732	19.301	0.315611	5.61084					2.264	0.101	0.058589	0.0102707
																		6.983	0.056	0.465746	0.0162793				4.762	44.483	0.317612	12.9313					2.659	0.06	0.068811	0.00610139
																		4.346	0.043	0.289866	0.0125002				5.833	54.275	0.389044	15.7778					5.117	0.136	0.13242	0.0138298
																		9.835	0.092	0.655966	0.0267446				7.902	65.443	0.527041	19.0244					2.934	0.13	0.0759276	0.0132197
																		3.437	0.043	0.229238	0.0125002				9.01	67.985	0.600941	19.7634					2.646	0.044	0.0684746	0.00447435
																		3.411	0.027	0.227504	0.00784895				1.947	0.034	0.129859	0.00988386					1.943	0.029	0.050282	0.00294901
																		2.31	0.027	0.15407	0.00784895				24.022	0.019	1.6022	0.00552333					3.16	0.072	0.0817761	0.00732167
																		9.362	0.094	0.624419	0.027326				11.056	92.461	0.737404	26.8786					2.224	0.106	0.0575538	0.0107791
																		6.122	0.038	0.40832	0.0110467				5.543	49.437	0.369702	14.3714					3.513	0.299	0.0909112	0.0304053
																		6.525	0.055	0.435199	0.0159886				4.555	20.563	0.303806	5.9777					3.393	0.058	0.0878058	0.00589801
																		4.45	0.029	0.296802	0.00843035				8.835	76.079	0.589269	22.1163					2.078	0.117	0.0537756	0.0118977
																		11.066	0.106	0.738071	0.0308144				5.128	34.079	0.342023	9.90683					2.8	0.052	0.0724599	0.00528787
																		7.252	0.059	0.483688	0.0171514				4.442	25.845	0.296269	7.51319					3.619	5.91	0.0936544	0.600987
																		8.733	0.076	0.582466	0.0220933				7.466	72.035	0.497961	20.9407					10.138	35.34	0.262356	3.59372
																		4.374	0.05	0.291733	0.0145351				7.827	72.913	0.522039	21.1959					2.095	0.159	0.0542155	0.0161687
																		9.411	0.076	0.627687	0.0220933				5.873	52.666	0.391712	15.3101					2.339	0.084	0.0605299	0.00854195
																		120.15	19.348	8.01366	5.6245				7.946	78.091	0.529976	22.7012					1.994	0.058	0.0516018	0.00589801
																		9.896	0.09	0.660035	0.0261632				5.361	48.962	0.357563	14.2333					3.071	9.645	0.0794729	0.980799
																		156.904	24.645	10.465	7.16435				5.081	37.84	0.338888	11.0002					2.204	0.08	0.0570363	0.00813519
																		5.611	0.046	0.374238	0.0133723				5.999	51.844	0.400116	15.0711					2.292	0.097	0.0593136	0.00986392
																		5.001	0.049	0.333552	0.0142444				6.226	55.966	0.415256	16.2694					2.696	0.039	0.0697685	0.0039659
																		9.962	0.085	0.664437	0.0247097				23.143	0.031	1.54357	0.00901176					26.298	0.051	0.680553	0.00518618
																		9.143	0.078	0.609812	0.0226747				7.168	70.052	0.478085	20.3642					1.597	0.029	0.041328	0.00294901
																		4.879	0.045	0.325415	0.0130816				4.781	34.415	0.318879	10.0045					2.103	0.033	0.0544225	0.00335577
																		6.875	0.062	0.458543	0.0180235				7.731	73.935	0.515636	21.493					9.361	60.19	0.242249	6.12071
																		56.115	11.918	3.74271	3.46458				4.248	29.248	0.283329	8.50245					8.486	44.539	0.219605	4.52916
																		9.268	0.09	0.618149	0.0261632				4.985	45.971	0.332485	13.3639					1.243	0.031	0.032167	0.00315239
																		25.525	3.351	1.70244	0.974142				6.429	55.047	0.428796	16.0023					5.401	0.681	0.13977	0.0692508
																		94.043	15.304	6.2724	4.4489				4.65	29.803	0.310142	8.66379					2.313	0.137	0.059857	0.0139315
																		3.27	0.025	0.2181	0.00726755				4.502	35.478	0.300271	10.3135					9.49	51.489	0.245587	5.23591
																		3.927	0.173	0.26192	0.0502914				13.176	141.002	0.878802	40.9895					7.603	51.712	0.196754	5.25859
																		79.756	15.996	5.3195	4.65007				8.664	66.82	0.577864	19.4247					10.926	42.238	0.282749	4.29518
																		31.129	7.066	2.07622	2.0541				4.344	35.513	0.289732	10.3237					6.733	43.73	0.17424	4.4469
																		6.235	0.036	0.415857	0.0104653				5.503	53.349	0.367034	15.5087					13.734	0.08	0.355416	0.00813519
																		2.335	0.018	0.155738	0.00523263				7.976	77.184	0.531976	22.4375					10.96	0.141	0.283629	0.0143383
																		6.715	0.054	0.447871	0.0156979				6.236	53.87	0.415923	15.6601					15.206	0.072	0.393509	0.00732167
																		3.159	0.02	0.210696	0.00581404				6.335	51.135	0.422526	14.865					5.958	34.846	0.154184	3.54348
																		6.535	0.061	0.435866	0.0177328				2.367	0.049	0.157872	0.0142444					10.182	0.594	0.263495	0.0604038
																		4.132	0.034	0.275593	0.00988386				9.338	91.453	0.622818	26.5856					8.605	63.605	0.222685	6.46798
																		2.376	0.023	0.158472	0.00668614				1.466	0.022	0.097778	0.00639544					7.97	13.732	0.206252	1.39641
																		2.849	0.022	0.19002	0.00639544				7.478	74.224	0.498761	21.5771					11.289	0.032	0.292143	0.00325408
																		20.66	0.036	1.37796	0.0104653				4.422	35.673	0.294935	10.3702					25.864	0.021	0.669322	0.00213549
																		25.008	0.052	1.66796	0.0151165				5.467	53.181	0.364633	15.4598					15.205	0.245	0.393483	0.024914
																		17.4	0.05	1.16053	0.0145351				2.662	18.463	0.177548	5.36723					10.216	72.298	0.264375	7.35197
																		15.665	0.039	1.04481	0.0113374				11.412	0.097	0.761148	0.0281981					26.491	0.021	0.685548	0.00213549
																		11.946	0.012	0.796764	0.00348842				5.724	44.008	0.381774	12.7932					7.841	55.368	0.202913	5.63036
																		14.219	0.009	0.948367	0.00261632				1.235	0.022	0.082371	0.00639544					14.48	3.035	0.374721	0.308629
																		6.946	0.012	0.463278	0.00348842				2.363	16.158	0.157605	4.69716					7.183	44.884	0.185885	4.56425
																		2.259	0.014	0.150669	0.00406983				6.634	62.582	0.442469	18.1927					10.542	80.224	0.272811	8.15797
																		24.665	0.035	1.64509	0.0101746				4.801	11.476	0.320213	3.33609					11.3	90.192	0.292427	9.17161
																		22.448	1.512	1.49722	0.439541				2.593	17.653	0.172946	5.13176					10.836	82.653	0.28042	8.40497
																		13.248	0.05	0.883604	0.0145351				7.939	73.309	0.529509	21.3111					19.144	0.024	0.495418	0.00244056
																		21.546	0.055	1.43706	0.0159886				13.309	43.561	0.887672	12.6633					6.845	41.847	0.177138	4.25542
																		13.878	0.03	0.925623	0.00872105				11.263	117.889	0.75121	34.2705					13.665	0.545	0.35363	0.055421
																		18.431	0.053	1.2293	0.0154072				6.41	35.37	0.427529	10.2821					27.262	0.023	0.7055	0.00233887
																		7.826	0.026	0.521972	0.00755825				5.574	48.87	0.37177	14.2066					8.743	57.143	0.226256	5.81086
																		13.05	0.046	0.870398	0.0133723				39.932	0.025	2.66335	0.00726755					8.021	58.402	0.207572	5.93889
																		10.312	0.041	0.687781	0.0119188				6.005	68.063	0.400516	19.786					9.122	66.106	0.236064	6.72231
																		23.838	0.045	1.58993	0.0130816				1.619	0.026	0.107983	0.00755825					24.201	0.027	0.626286	0.00274563
																		13.232	0.039	0.882537	0.0113374				6.263	57.484	0.417724	16.7107					22.44	0.026	0.580714	0.00264394
																		12.04	0.056	0.803034	0.0162793				5.84	33.3	0.389511	9.68037					26.817	0.023	0.693984	0.00233887
																		11.829	0.049	0.788961	0.0142444				6.664	37.282	0.44447	10.8379					9.625	72.693	0.249081	7.39214
																		13.21	0.055	0.881069	0.0159886				7.387	79.956	0.492692	23.2434					13.69	0.24	0.354277	0.0244056
																		20.777	0.058	1.38577	0.0168607				7.786	88.483	0.519304	25.7222					16.296	126.122	0.421716	12.8253
																		3.734	0.013	0.249047	0.00377912				26.461	0.023	1.76487	0.00668614					10.775	0.167	0.278841	0.0169822
																		10.501	4.57	0.700387	1.32851				7.709	81.195	0.514168	23.6035					25.832	0.059	0.668494	0.0059997
																		28.318	0.054	1.88873	0.0156979				2.464	19.643	0.164342	5.71026					8.151	51.784	0.210936	5.26591
																		3.301	0.022	0.220167	0.00639544				10.403	131.933	0.69385	38.3532					9.081	56.026	0.235003	5.69728
																		21.731	0.035	1.4494	0.0101746				5.179	48.89	0.345425	14.2124					6.379	0.409	0.165079	0.0415911
																		17.293	0.045	1.15339	0.0130816				4.851	47.8	0.323548	13.8955					19.647	0.03	0.508435	0.0030507
																		12.016	0.046	0.801433	0.0133723				3.335	28.298	0.222435	8.22628					8.515	53.428	0.220356	5.43309
																		15.687	0.048	1.04628	0.0139537				4.793	49.421	0.319679	14.3668					18.99	0.027	0.491433	0.00274563
																		6.906	0.027	0.46061	0.00784895				3.991	47.593	0.266188	13.8354					16.565	0.047	0.428678	0.00477942
																		17.355	0.054	1.15753	0.0156979				6.597	52.353	0.440001	15.2191					43.676	0.032	1.13027	0.00325408
																		1.69	0.013	0.112718	0.00377912				43.206	0.024	2.88172	0.00697684					31.391	0.027	0.812353	0.00274563
																		24.549	0.051	1.63735	0.0148258				4.127	44.759	0.275259	13.0115					22.254	0.035	0.575901	0.00355914
																		11.565	0.057	0.771353	0.01657				5.532	59.329	0.368969	17.247
																		6.576	0.041	0.4386	0.0119188				4.778	42.478	0.318679	12.3484
																		4.506	0.035	0.300537	0.0101746				2.667	24.867	0.177881	7.22888
																		4.639	0.044	0.309408	0.0127909				5.554	68.14	0.370436	19.8084
																		21.164	0.055	1.41158	0.0159886				3.626	38.221	0.241844	11.1109
																		6.876	0.035	0.45861	0.0101746				2.457	20.366	0.163875	5.92043
																		12.741	0.031	0.849788	0.00901176				8.821	111.757	0.588336	32.488
																		24.448	0.053	1.63061	0.0154072				4.278	45.857	0.28533	13.3307
																		3.353	0.015	0.223636	0.00436053				1.924	11.979	0.128325	3.48232
																		23.293	0.063	1.55358	0.0183142				3.044	31.425	0.203026	9.1353
																		16.011	0.05	1.06789	0.0145351				1.965	13.063	0.13106	3.79744
																		13.761	0.044	0.917819	0.0127909				4.507	42.496	0.300604	12.3537
																		6.01	0.026	0.40085	0.00755825				2.646	24.869	0.176481	7.22946
																		16.289	0.04	1.08643	0.0116281				3.947	31.593	0.263254	9.18414
																		13.015	0.059	0.868063	0.0171514				4.999	53.103	0.333419	15.4371
																		3.471	0.296	0.231506	0.0860477				2.115	11.561	0.141064	3.3608
																		19.215	0.055	1.28159	0.0159886				4.033	42.052	0.26899	12.2246
																		21.084	0.048	1.40624	0.0139537				3.278	33.91	0.218633	9.8577
																		10.699	0.039	0.713593	0.0113374				56.019	0.02	3.73631	0.00581404
																		15.683	0.057	1.04601	0.01657				25.693	0.016	1.71365	0.00465123
																		7.341	0.026	0.489624	0.00755825				7.793	97.134	0.519771	28.237
																		20.016	0.047	1.33501	0.013663				4.163	45.172	0.27766	13.1316
																		6.903	0.029	0.46041	0.00843035				6.404	55.173	0.427129	16.0389
																		21.808	0.078	1.45453	0.0226747				8.256	89.121	0.550652	25.9076
																		16.889	0.042	1.12645	0.0122095				7.902	95.073	0.527041	27.6379
																		13.389	0.035	0.893008	0.0101746				47.789	0.021	3.18739	0.00610474
																		10.849	2.84	0.723597	0.825593				3.931	31.549	0.262186	9.17135
																		17.544	0.055	1.17013	0.0159886				4.516	45.549	0.301204	13.2412
																		14.524	0.036	0.968709	0.0104653				64.06	0.023	4.27262	0.00668614
																		4.962	0.813	0.330951	0.236341				41.725	0.021	2.78294	0.00610474
																		10.172	0.031	0.678443	0.00901176				46.427	0.02	3.09655	0.00581404
																		47.102	14.221	3.14157	4.13407				56.962	0.015	3.7992	0.00436053
																		13.006	0.049	0.867463	0.0142444				81.428	0.02	5.43102	0.00581404
																		9.034	0.027	0.602542	0.00784895				14.245	0.017	0.950101	0.00494193
																		11.233	0.037	0.749209	0.010756				79.523	0.013	5.30396	0.00377912
																		8.038	0.028	0.536112	0.00813965				39.357	0.018	2.625	0.00523263
																		13.482	0.047	0.899211	0.013663				37.839	0.016	2.52375	0.00465123
																		7.788	0.027	0.519437	0.00784895				49.194	0.019	3.2811	0.00552333
																		4.724	0.036	0.315077	0.0104653				7.599	67.688	0.506832	19.677
																		18.203	0.053	1.21409	0.0154072				40.248	0.026	2.68443	0.00755825
																		15.642	0.04	1.04328	0.0116281				1.58	8.014	0.105381	2.32968
																		32.368	9.898	2.15885	2.87737				59.915	0.018	3.99616	0.00523263
																		5.007	0.035	0.333953	0.0101746				8.604	99.558	0.573862	28.9417
																		14.841	0.036	0.989852	0.0104653				52.216	0.02	3.48266	0.00581404
																		12.959	0.058	0.864328	0.0168607				22.852	64.667	1.52416	18.7988
																		12.333	0.04	0.822576	0.0116281				5.385	54.541	0.359164	15.8552
																		17.354	0.049	1.15746	0.0142444				24.216	27.458	1.61514	7.98209
																		15.062	0.043	1.00459	0.0125002				36.755	0.055	2.45145	0.0159886
																		6.25	0.027	0.416857	0.00784895				7.768	73.197	0.518103	21.2785
																		4.735	0.027	0.315811	0.00784895				4.463	50.171	0.297669	14.5848
																		7.233	0.032	0.48242	0.00930246				22.932	0.027	1.5295	0.00784895
																		7.301	0.036	0.486956	0.0104653				8.223	92.087	0.548451	26.7699
																		22.628	0.048	1.50922	0.0139537				6.889	67.028	0.459477	19.4852
																		4.797	0.026	0.319946	0.00755825				25.362	0.023	1.69157	0.00668614
																		4.084	0.022	0.272391	0.00639544				41.346	0.022	2.75766	0.00639544
																		21.199	0.037	1.41391	0.010756				5.371	56.193	0.35823	16.3354
																		7.142	0.047	0.476351	0.013663				3.445	37.11	0.229772	10.7879
																		17.566	0.042	1.1716	0.0122095				5.403	52.291	0.360365	15.2011
																		10.245	0.032	0.683312	0.00930246				3.7	39.43	0.246779	11.4624
																		6.624	0.03	0.441802	0.00872105				7.682	76.592	0.512367	22.2654
																		5.417	0.036	0.361298	0.0104653				31.372	0.02	2.09242	0.00581404
																		11.465	0.03	0.764683	0.00872105				4.978	53.325	0.332018	15.5017
																		48.775	12.809	3.25315	3.7236				28.43	9.797	1.8962	2.84801
																		6.734	0.027	0.449139	0.00784895				4.509	47.793	0.300737	13.8935
																		7.163	0.029	0.477752	0.00843035				4.785	31.721	0.319146	9.22135
																		19.681	1.861	1.31267	0.540996				3.62	35.977	0.241444	10.4586
																		13.787	0.029	0.919554	0.00843035				5.279	46.124	0.352094	13.4083
																		7.025	0.037	0.468547	0.010756				4.353	33.165	0.290333	9.64113
																		4.763	0.028	0.317679	0.00813965				1.59	0.033	0.106048	0.00959316
																		8.521	0.022	0.568326	0.00639544				4.777	35.035	0.318612	10.1847
																		5	0.025	0.333486	0.00726755				3.508	38.314	0.233974	11.1379
																		20.521	5.17	1.36869	1.50293				9.259	19.153	0.617549	5.56781
																		8.784	0.046	0.585868	0.0133723				5.566	63.061	0.371236	18.3319
																		17.486	0.038	1.16627	0.0110467				10.38	27.362	0.692316	7.95418
																		8.329	0.032	0.555521	0.00930246				4.357	41.676	0.290599	12.1153
																		64.916	17.516	4.32971	5.09193				6.506	66.865	0.433932	19.4378
																		8.458	0.036	0.564124	0.0104653				5.796	70.888	0.386577	20.6073
																		8.681	0.031	0.578998	0.00901176				7.311	62.412	0.487623	18.1433
																		10.935	0.034	0.729333	0.00988386				3.523	28.021	0.234974	8.14576
																		13.695	0.024	0.913417	0.00697684				6.845	68.862	0.456542	20.0183
																		13.274	1.573	0.885338	0.457274				5.301	56.28	0.353562	16.3607
																		12.816	0.07	0.854791	0.0203491				3.575	19.354	0.238442	5.62624
																		6.264	0.046	0.417791	0.0133723				3.224	24.714	0.215032	7.1844
																		9.115	0.042	0.607944	0.0122095				4.124	41.667	0.275059	12.1127
																		4.725	0.037	0.315144	0.010756				11.935	5.169	0.79603	1.50264
																		9.279	0.034	0.618883	0.00988386				3.855	36.604	0.257118	10.6408
																		5.85	0.035	0.390178	0.0101746				30.067	0.026	2.00538	0.00755825
																		37.661	11.564	2.51188	3.36168				32.524	0.018	2.16926	0.00523263
																		17.852	0.071	1.19068	0.0206398				5.638	49.138	0.376039	14.2845
																		7.766	0.018	0.51797	0.00523263				16.694	0.627	1.11344	0.18227
																		16.634	0.061	1.10944	0.0177328				14.122	10.877	0.941897	3.16196
																		6.676	0.041	0.44527	0.0119188				5.6	63.086	0.373504	18.3392
																		7.802	0.042	0.520371	0.0122095				15.599	0.02	1.04041	0.00581404
																		14.769	0.051	0.98505	0.0148258				9.46	0.339	0.630955	0.0985479
																		7.194	0.035	0.479819	0.0101746				12.294	50.007	0.819975	14.5371
																		5.608	0.028	0.374038	0.00813965				16.471	16.272	1.09857	4.7303
																		8.378	0.03	0.558789	0.00872105				20.294	0.021	1.35355	0.00610474
																		5.754	0.032	0.383775	0.00930246				7.625	14.595	0.508566	4.24279
																		2.392	0.077	0.15954	0.022384				5.034	17.244	0.335753	5.01286
																		0.888	0.011	0.0592271	0.00319772				7.377	64.463	0.492025	18.7395
																		4.986	52.321	0.332552	15.2098				5.467	18.281	0.364633	5.31432
																		5.518	59.436	0.368035	17.2782				16.3	12.923	1.08716	3.75674
																		2.275	22.135	0.151736	6.43468				59.679	0.016	3.98042	0.00465123
																		3.695	32.066	0.246446	9.32164				14.866	0.02	0.99152	0.00581404
																		0.673	0.012	0.0448872	0.00348842				6.375	62.869	0.425194	18.2761
																		0.663	0.025	0.0442202	0.00726755				22.384	0.02	1.49295	0.00581404
																		0.852	0.33	0.056826	0.0959316				6.051	22.197	0.403584	6.45271
																		2.998	31.807	0.199958	9.24635				40.544	0.021	2.70417	0.00610474
																		2.855	29.653	0.19042	8.62018				8.241	88.513	0.549651	25.7309
																		4.438	46.581	0.296002	13.5412				7.984	83.721	0.53251	24.3378
																		0.572	0.023	0.0381508	0.00668614				7.847	0.027	0.523373	0.00784895
																		5.733	64.515	0.382375	18.7546				7.524	61.323	0.501829	17.8267
																		1.989	20.867	0.132661	6.06608				6.911	31.437	0.460944	9.13879
																		0.846	0.653	0.0564258	0.189828				18.782	0.014	1.25271	0.00406983
																		3.886	38.345	0.259185	11.147				64.961	0.019	4.33271	0.00552333
																		0.54	0.042	0.0360165	0.0122095				2.686	0.071	0.179149	0.0206398
																		6.645	76.238	0.443203	22.1625				21.193	0.022	1.41351	0.00639544
																		2.963	28.161	0.197624	8.18645				6.127	65.934	0.408653	19.1671
																		3.394	31.357	0.22637	9.11554				3.858	20.618	0.257318	5.99369
																		0.805	0.613	0.0536912	0.1782				8.475	63.976	0.565258	18.5979
																		0.957	0.019	0.0638292	0.00552333				22.289	0.023	1.48661	0.00668614
																		0.754	0.011	0.0502896	0.00319772				30.312	0.041	2.02172	0.0119188
																		0.599	0.498	0.0399516	0.14477				8.58	18.886	0.572262	5.49019
																		1.02	3.534	0.0680311	1.02734				36.379	2.992	2.42638	0.86978
																		5.948	63.076	0.396715	18.3363				5.88	47.655	0.392179	13.8534
																		4.709	46.792	0.314077	13.6025				6.42	48.906	0.428196	14.2171
																		0.745	0.012	0.0496894	0.00348842				7.11	50.108	0.474217	14.5665
																		3.234	8.448	0.215699	2.45585				5.439	38.658	0.362766	11.238
																		6.727	0.006	0.448672	0.00174421				5.989	49.276	0.399449	14.3246
																		14.725	0.003	0.982115	0.000872105				5.296	48.201	0.353228	14.0121
																		10.465	0.008	0.697986	0.00232561				4.382	35.134	0.292267	10.2135
																		25.108	0.012	1.67463	0.00348842				7.648	68.413	0.5101	19.8878
																		9.854	0.006	0.657234	0.00174421				5.318	44.887	0.354695	13.0487
																		1.63	0.006	0.108716	0.00174421				3.569	24.11	0.238042	7.00882
																		4.75	0.005	0.316811	0.00145351				8.38	71.96	0.558922	20.9189
																		10.256	0.031	0.684046	0.00901176				7.263	65.369	0.484421	19.0029
																		2.394	18.713	0.159673	5.4399				5.62	50.532	0.374838	14.6897
																		6.821	8.187	0.454941	2.37998				5.125	45.513	0.341823	13.2307
																		7.7	0.004	0.513568	0.00116281				5.554	48.532	0.370436	14.1083
																		7.971	0.023	0.531643	0.00668614				3.68	22.3	0.245446	6.48265
																		5.013	0.007	0.334353	0.00203491				7.208	66.167	0.480753	19.2349
																		12.124	0.003	0.808636	0.000872105				8.147	73.575	0.543382	21.3884
																		16.155	0.005	1.07749	0.00145351				6.03	58.393	0.402184	16.975
																		11.518	0.016	0.768218	0.00465123				9.574	68.423	0.638558	19.8907
																		10.004	0.004	0.667238	0.00116281				8.079	62.327	0.538846	18.1186
																		1.002	0.007	0.0668305	0.00203491				6.085	48.308	0.405852	14.0432
																		1.973	0.004	0.131593	0.00116281				7.627	63.29	0.508699	18.3985
																		9.943	0.009	0.66317	0.00261632				6.7	56.58	0.446871	16.4479
																		10.353	0.029	0.690516	0.00843035				5.477	46.53	0.3653	13.5264
																		1.515	0.011	0.101046	0.00319772				10.941	95.652	0.729733	27.8062
																		3.636	0.021	0.242511	0.00610474				4.881	45.622	0.325549	13.2624
																		22.906	0.011	1.52776	0.00319772				6.89	53.395	0.459543	15.522
																		22.056	0.004	1.47107	0.00116281				4.311	31.148	0.287531	9.05478
																		3.594	0.005	0.23971	0.00145351				5.016	39.702	0.334553	11.5414
																		1.513	0.008	0.100913	0.00232561				5.098	43.676	0.340022	12.6967
																		1.04	0.005	0.069365	0.00145351				5.294	40.369	0.353095	11.7353
																		6.511	0.005	0.434265	0.00145351				6.381	60.485	0.425594	17.5831
																		8.324	0.005	0.555187	0.00145351				5.896	50.55	0.393246	14.695
																		6.543	0.006	0.436399	0.00174421				5.705	51.516	0.380507	14.9758
																		8.921	0.011	0.595005	0.00319772				6.203	52.552	0.413722	15.277
																		6.651	0.007	0.443603	0.00203491				6.067	55.636	0.404652	16.1735
																		6.981	0.006	0.465613	0.00174421				6.216	52.819	0.414589	15.3546
																		9.684	0.008	0.645895	0.00232561				3.456	22.817	0.230505	6.63294
																		3.344	20.947	0.223035	6.08933				5.337	42.41	0.355963	12.3287
																		7.421	0.004	0.49496	0.00116281				3.239	21.033	0.216032	6.11433
																		0.514	0.01	0.0342823	0.00290702				8.462	0.172	0.564391	0.0500007
																		1.699	0.013	0.113318	0.00377912				4.432	35.102	0.295602	10.2042
																		22.099	0.033	1.47394	0.00959316				3.038	22.363	0.202626	6.50096
																		5.329	0.007	0.355429	0.00203491				4.804	34.739	0.320413	10.0987
																		16.027	0.011	1.06896	0.00319772				6.221	50.646	0.414923	14.7229
																		5.691	0.004	0.379573	0.00116281				4.786	35.718	0.319213	10.3833
																		2.98	0.009	0.198757	0.00261632				3.426	22.147	0.228504	6.43817
																		6.154	0.013	0.410454	0.00377912				4.672	33.234	0.311609	9.66118
																		3.317	0.005	0.221234	0.00145351				6.642	56.11	0.443002	16.3113
																		26.297	0.008	1.75393	0.00232561				5.656	44.783	0.377239	13.0185
																		6.942	0.005	0.463012	0.00145351				10.466	0.081	0.698052	0.0235468
																		9.335	0.005	0.622618	0.00145351				3.851	26.509	0.256851	7.70621
																		3.31	0.005	0.220768	0.00145351				5.914	48.126	0.394447	13.9903
																		2.916	0.006	0.194489	0.00174421				7.842	60.772	0.523039	17.6665
																		13.629	0.03	0.909015	0.00872105				8.337	69.994	0.556054	20.3474
																		26.678	0.005	1.77935	0.00145351				6.808	55.672	0.454074	16.184
																		16.281	0.004	1.0859	0.00116281				6.56	51.597	0.437533	14.9993
																		6.878	0.004	0.458743	0.00116281				6.504	53.812	0.433798	15.6432
																		6.194	0.182	0.413122	0.0529077				4.722	36.869	0.314944	10.7179
																		11.247	0.009	0.750143	0.00261632				6.798	59.345	0.453407	17.2517
																		4.899	0.048	0.326749	0.0139537				13.5	113.73	0.900411	33.0615
																		23.049	0.006	1.5373	0.00174421				6.424	55.838	0.428462	16.2322
																		0.68	0.025	0.0453541	0.00726755				3.332	22.314	0.222235	6.48672
																		8.254	0.006	0.550518	0.00174421				7.332	60.909	0.489023	17.7064
																		13.54	0.008	0.903079	0.00232561				6.941	58.488	0.462945	17.0026
																		13.752	0.007	0.917219	0.00203491				6.939	56.294	0.462812	16.3648
																		1.267	0.033	0.0845053	0.00959316				15.705	139.794	1.04748	40.6384
																		5.297	22.928	0.353295	6.66521				8.466	63.985	0.564658	18.6006
																		2.861	0.008	0.190821	0.00232561				9.76	88.178	0.650964	25.6335
																		17.539	0.121	1.1698	0.0351749				5.139	42.268	0.342757	12.2874
																		7.122	25.032	0.475017	7.27685				7.465	69.905	0.497894	20.3215
																		10.794	0.012	0.719929	0.00348842				4.066	33.004	0.271191	9.59432
																		3.91	22.705	0.260786	6.60038				2.684	20.67	0.179015	6.00881
																		21.832	0.016	1.45613	0.00465123				8.297	70.042	0.553386	20.3613
																		13.674	0.011	0.912017	0.00319772				10.423	111.764	0.695184	32.49
																		4.384	0.007	0.2924	0.00203491				42.302	0.023	2.82142	0.00668614
																		2.172	0.011	0.144866	0.00319772				2.787	23.104	0.185885	6.71638
																		6.018	0.018	0.401383	0.00523263				4.979	40.996	0.332085	11.9176
																		21.964	0.008	1.46494	0.00232561				4.124	36.689	0.275059	10.6656
																		4.743	0.011	0.316345	0.00319772				6.7	66.759	0.446871	19.407
																		3.716	31.617	0.247847	9.19112				10.016	87.029	0.668039	25.2995
																		7.045	0.085	0.469881	0.0247097				10.237	48.406	0.682779	14.0717
																		4.221	0.044	0.281529	0.0127909				7.005	69.695	0.467214	20.2605
																		0.797	0.003	0.0531576	0.000872105				19.894	23.728	1.32687	6.89777
																		19.737	0.042	1.3164	0.0122095				4.45	37.393	0.296802	10.8702
																		9.791	0.012	0.653032	0.00348842				5.698	54.658	0.38004	15.8892
																		13.035	0.042	0.869397	0.0122095				7.98	82.793	0.532243	24.0681
																		16.923	0.003	1.12872	0.000872105				4.255	31.433	0.283796	9.13763
																		11.644	0.037	0.776622	0.010756				1.862	8.95	0.12419	2.60178
																		5.31	33.374	0.354162	9.70188				5.754	59.079	0.383775	17.1744
																		12.213	0.011	0.814572	0.00319772				4.808	34.02	0.32068	9.88968
																		24.217	0.006	1.6152	0.00174421				4.953	26.622	0.330351	7.73906
																		20.272	0.011	1.35208	0.00319772
																		14.684	0.005	0.979381	0.00145351
																		10.3	0.006	0.686981	0.00174421
																		2.876	0.014	0.191821	0.00406983
																		2.065	0.009	0.13773	0.00261632
																		16.298	0.048	1.08703	0.0139537
																		23.44	0.005	1.56338	0.00145351
																		6.586	0.025	0.439267	0.00726755
																		3.541	0.083	0.236175	0.0241283
																		14.805	0.006	0.987451	0.00174421
																		8.601	0.008	0.573662	0.00232561
																		11.662	0.009	0.777822	0.00261632
																		5.905	0.006	0.393847	0.00174421
																		3.398	0.042	0.226637	0.0122095
																		14.097	0.027	0.94023	0.00784895
																		2.827	0.011	0.188553	0.00319772
																		3.057	34.486	0.203893	10.0251
																		4.319	27.811	0.288065	8.08471
																		2.949	0.006	0.19669	0.00174421
																		1.885	0.004	0.125724	0.00116281
																		4.547	23.948	0.303272	6.96173
																		7.3	0.015	0.486889	0.00436053
																		2.153	0.008	0.143599	0.00232561
																		6.013	0.076	0.40105	0.0220933
																		1.088	0.006	0.0725665	0.00174421
																		8.386	0.005	0.559322	0.00145351
																		3.1	13.331	0.206761	3.87535
																		2.178	0.004	0.145266	0.00116281
																		4.782	28.407	0.318946	8.25797
																		3.235	0.209	0.215765	0.0607567
																		1.334	0.014	0.088974	0.00406983
																		3.742	0.01	0.249581	0.00290702
																		6.135	0.005	0.409187	0.00145351
																		10.753	0.01	0.717194	0.00290702
																		9.299	0.006	0.620217	0.00174421
																		1.59	0.004	0.106048	0.00116281
																		2.822	0.013	0.188219	0.00377912
																		4.301	0.016	0.286864	0.00465123
																		4.147	0.007	0.276593	0.00203491
																		8.073	0.005	0.538446	0.00145351
																		4.227	0.01	0.281929	0.00290702
																		11.382	0.005	0.759147	0.00145351
																		6.98	0.008	0.465546	0.00232561
																		7.85	0.006	0.523573	0.00174421
																		1.017	0.007	0.067831	0.00203491
																		4.311	51.209	0.287531	14.8865
																		8.733	0.008	0.582466	0.00232561
																		8.643	0.007	0.576463	0.00203491
																		12.695	0.007	0.84672	0.00203491
																		7.139	0.007	0.476151	0.00203491
																		4.035	0.007	0.269123	0.00203491
																		4.198	24.945	0.279995	7.25156
																		1.016	0.871	0.0677643	0.253201
																		6.198	0.006	0.413389	0.00174421
																		4.292	0.016	0.286264	0.00465123
																		15.935	0.045	1.06282	0.0130816
																		31.079	0.071	2.07288	0.0206398
																		24.588	0.068	1.63995	0.0197677
																		21.438	0.072	1.42985	0.0209305
																		18.345	0.059	1.22356	0.0171514
																		24.243	0.081	1.61694	0.0235468
																		13.491	0.056	0.899811	0.0162793
																		9.186	0.041	0.61268	0.0119188
																		16.877	0.152	1.12565	0.0441867
																		13.53	0.045	0.902412	0.0130816
																		15.612	0.073	1.04128	0.0212212
																		28.827	0.059	1.92268	0.0171514
																		13.609	0.056	0.907681	0.0162793
																		17.475	0.07	1.16553	0.0203491
																		29.805	0.061	1.98791	0.0177328
																		25.919	0.078	1.72872	0.0226747
																		23.391	0.083	1.56011	0.0241283
																		24.482	0.066	1.63288	0.0191863
																		24.163	0.08	1.6116	0.0232561
																		21.509	0.061	1.43459	0.0177328
																		19.061	0.09	1.27131	0.0261632
																		23.51	0.071	1.56805	0.0206398
																		17.489	0.05	1.16647	0.0145351
																		21.52	0.057	1.43532	0.01657
																		9.891	0.063	0.659701	0.0183142
																		31.98	0.075	2.13297	0.0218026
																		18.438	0.068	1.22976	0.0197677
																		8.381	0.072	0.558989	0.0209305
																		33.97	0.113	2.2657	0.0328493
																		37.369	0.061	2.49241	0.0177328
																		24.764	0.078	1.65169	0.0226747
																		29.769	0.076	1.98551	0.0220933
																		23.175	0.068	1.54571	0.0197677
																		24.324	0.071	1.62234	0.0206398
																		19.883	0.075	1.32614	0.0218026
																		22.144	0.091	1.47694	0.0264539
																		23.821	0.082	1.58879	0.0238375
																		17.004	0.061	1.13412	0.0177328
																		12.592	0.044	0.83985	0.0127909
																		18.02	0.063	1.20188	0.0183142
																		32.659	0.068	2.17826	0.0197677
																		10.975	0.066	0.732001	0.0191863
																		19.745	0.062	1.31694	0.0180235
																		22.054	0.064	1.47094	0.0186049
																		23.875	0.075	1.59239	0.0218026
																		30.358	0.076	2.02479	0.0220933
																		19.176	0.076	1.27898	0.0220933
																		40.124	0.077	2.67616	0.022384
																		23.526	0.065	1.56912	0.0188956
																		31.923	0.062	2.12917	0.0180235
																		16.987	0.054	1.13298	0.0156979
																		25.171	0.052	1.67883	0.0151165
																		24.908	2.013	1.66129	0.585183
																		23.508	0.058	1.56792	0.0168607
																		10.905	0.047	0.727332	0.013663
																		27.972	0.072	1.86565	0.0209305
																		15.286	0.068	1.01953	0.0197677
																		15.618	0.072	1.04168	0.0209305
																		37.217	0.07	2.48227	0.0203491
																		29.309	0.069	1.95483	0.0200584
																		19.467	0.06	1.29839	0.0174421
																		15.696	0.062	1.04688	0.0180235
																		17.222	0.074	1.14866	0.0215119
																		14.702	0.059	0.980581	0.0171514
																		18.686	0.066	1.2463	0.0191863
																		27.237	0.059	1.81663	0.0171514
																		30.636	0.059	2.04333	0.0171514
																		64.073	7.539	4.27349	2.1916
																		26.39	0.086	1.76014	0.0250004
																		31.666	0.065	2.11203	0.0188956
																		17.169	0.097	1.14512	0.0281981
																		23.175	0.08	1.54571	0.0232561
																		32.872	0.068	2.19247	0.0197677
																		18.24	0.052	1.21656	0.0151165
																		15.072	0.068	1.00526	0.0197677
																		27.348	0.058	1.82403	0.0168607
																		16.225	0.082	1.08216	0.0238375
																		17.163	0.059	1.14472	0.0171514
																		17.512	0.052	1.168	0.0151165
																		27.563	0.061	1.83837	0.0177328
																		16.789	0.086	1.11978	0.0250004
																		17.902	0.07	1.19401	0.0203491
																		38.267	0.085	2.5523	0.0247097
																		30.341	0.083	2.02366	0.0241283
																		21.478	0.086	1.43252	0.0250004
																		43.453	0.071	2.89819	0.0206398
																		21.613	0.085	1.44153	0.0247097
																		18.633	0.072	1.24277	0.0209305
																		15.646	0.085	1.04354	0.0247097
																		28.311	0.099	1.88826	0.0287795
																		32.153	0.056	2.14451	0.0162793
																		20.174	0.097	1.34555	0.0281981
																		18.752	0.049	1.2507	0.0142444
																		25.275	0.056	1.68577	0.0162793
																		16.101	0.068	1.07389	0.0197677
																		22.221	0.077	1.48208	0.022384
																		12.531	0.092	0.835782	0.0267446
																		12.944	0.055	0.863328	0.0159886
																		28.937	0.058	1.93002	0.0168607
																		15.639	0.079	1.04308	0.0229654
																		15.471	0.084	1.03187	0.024419
																		17.914	0.078	1.19481	0.0226747
																		27.478	0.083	1.8327	0.0241283
																		25.974	0.081	1.73239	0.0235468
																		30.99	0.083	2.06694	0.0241283
																		35.108	0.103	2.3416	0.0299423
																		25.89	0.109	1.72679	0.0316865
																		12.665	0.073	0.844719	0.0212212
																		49.068	6.028	3.2727	1.75235
																		6.17	0.056	0.411521	0.0162793
																		32.688	0.079	2.1802	0.0229654
																		22.135	0.076	1.47634	0.0220933
																		19.381	0.076	1.29266	0.0220933
																		15.138	0.065	1.00966	0.0188956
																		23.705	0.078	1.58106	0.0226747
																		21.647	0.071	1.44379	0.0206398
																		12.84	0.071	0.856391	0.0206398
																		20.755	0.093	1.3843	0.0270353
																		21.941	0.04	1.4634	0.0116281
																		41.951	0.063	2.79801	0.0183142
																		17.073	0.081	1.13872	0.0235468
																		9.787	0.038	0.652765	0.0110467
																		32.095	0.064	2.14064	0.0186049
																		24.626	0.071	1.64248	0.0206398
																		15.575	0.079	1.03881	0.0229654
																		16.528	0.065	1.10237	0.0188956
																		25.115	0.06	1.6751	0.0174421
																		30.631	0.088	2.043	0.0255818
																		18.266	0.068	1.21829	0.0197677
																		62.09	7.973	4.14123	2.31777
																		32.483	3.743	2.16652	1.0881
																		12.06	0.281	0.804368	0.0816872
																		16.729	0.226	1.11578	0.0656986
																		52.619	8.52	3.50954	2.47678
																		18.388	0.074	1.22643	0.0215119
																		25.174	0.086	1.67903	0.0250004
																		94.2	10.924	6.28287	3.17563
																		23.404	0.071	1.56098	0.0206398
																		71.836	10.616	4.79126	3.08609
																		0.672	0.006	0.0448205	0.00174421
																		56.313	5.372	3.75592	1.56165
																		26.517	0.063	1.76861	0.0183142
																		14.362	0.162	0.957904	0.0470937
																		14.175	0.043	0.945432	0.0125002
																		5.063	0.471	0.337688	0.136921
																		51.255	5.944	3.41856	1.72793
																		0.431	0.005	0.0287465	0.00145351
																		18.691	0.039	1.24664	0.0113374
																		8.062	0.037	0.537712	0.010756
																		71.314	8.161	4.75644	2.37242
																		15.089	0.067	1.00639	0.019477
																		0.707	0.007	0.0471549	0.00203491
																		24.443	21.301	1.63028	6.19224
																		78.141	8.951	5.21178	2.60207
																		7.841	0.045	0.522972	0.0130816
																		0.878	0.007	0.0585601	0.00203491
																		3.035	16.074	0.202426	4.67274
																		37.884	5.817	2.52675	1.69101
																		26.62	2.707	1.77548	0.78693
																		82.805	9.094	5.52286	2.64364
																		2.908	0.028	0.193955	0.00813965
																		0.753	0.003	0.050223	0.000872105
																		46.426	8.713	3.09648	2.53289
																		39.913	4.97	2.66208	1.44479
																		3.595	9.61	0.239776	2.79364
																		0.492	0.01	0.032815	0.00290702
																		3.061	0.027	0.20416	0.00784895
																		0.474	0.042	0.0316144	0.0122095
																		6.097	0.928	0.406653	0.269771
																		1.31	0.007	0.0873733	0.00203491
																		36.235	9.945	2.41677	2.89103
																		19.17	17.955	1.27858	5.21955
																		24.722	6.316	1.64889	1.83607
																		2.629	0.024	0.175347	0.00697684
																		6.5	42.198	0.433531	12.267
																		4.831	20.557	0.322214	5.97596
																		0.621	0.123	0.0414189	0.0357563
																		0.873	0.008	0.0582266	0.00232561
																		0.806	0.081	0.0537579	0.0235468
																		6.622	40.305	0.441669	11.7167
																		8.058	65.211	0.537446	18.957
																		1.326	1.256	0.0884404	0.365121
																		5.542	17.033	0.369636	4.95152
																		0.806	0.252	0.0537579	0.0732569
																		5.584	35.982	0.372437	10.46
																		3.778	20.698	0.251982	6.01695
																		2.729	15.934	0.182017	4.63204
																		1.27	0.011	0.0847054	0.00319772
																		3.073	14.253	0.20496	4.14337
																		5.673	40.034	0.378373	11.638
																		5.274	38.614	0.351761	11.2252
																		6.643	51.832	0.443069	15.0677
																		0.675	0.006	0.0450206	0.00174421
																		1.908	9.424	0.127258	2.73957
																		4.293	29.02	0.286331	8.43617
																		1.548	6.044	0.103247	1.757
																		5.689	36.511	0.37944	10.6138
																		2.04	0.008	0.136062	0.00232561
																		3.428	21.258	0.228638	6.17974
																		6.793	46.321	0.453074	13.4656
																		1.529	0.021	0.10198	0.00610474
																		1.719	0.018	0.114652	0.00523263
																		5.939	43.818	0.396114	12.738
																		5.677	42.09	0.37864	12.2356
																		0.998	0.023	0.0665638	0.00668614
																		3.773	17.067	0.251648	4.96141
																		0.858	0.009	0.0572262	0.00261632
																		5.454	28.687	0.363766	8.33936
																		1.695	0.008	0.113052	0.00232561
																		0.703	0.005	0.0468881	0.00145351
																		0.976	0.012	0.0650964	0.00348842
																		0.692	0.005	0.0461544	0.00145351
																		1.539	0.009	0.102647	0.00261632
																		1.023	0.014	0.0682312	0.00406983

## Sheet: F1D
qPCR Analysis of endoderm and pluripotency markers in RUES2 hEPSCs and hEPSC-ACL
Units = relative increase (=POWER(2,ΔΔCt)
	GATA6					SOX17					NANOG					SOX2
	hEPSC	hEPSC-ACL				hEPSC	hEPSC-ACL				hEPSC	hEPSC-ACL				hEPSC	hEPSC-ACL
Exp 1	1	36.6459			Exp 1	1	14.4832			Exp 1	1	6.80205			Exp 1	1	0.440207
	0.932066	39.2414				0.991536	11.9962				0.825296	6.85535				0.978027	0.215796
Exp 2	1	31.2839			Exp 2	1	31.2839			Exp 2	1	1.91683			Exp 2	1	0.0797125
	0.774611	25.8675				0.876765	6.27969				0.959653	1.74248				1.04919	0.0958055
Exp 3	1	18.6707			Exp 3	1	3.18448			Exp 3	1	1.72769
	1.09789	33.8793				1.02849	7.40534				0.827397	2.43026
Number of values	6	6			Number of values	6	6			Number of values	6	6			Number of values	4	4
Minimum	0.7746	18.67			Minimum	0.8768	3.184			Minimum	0.8253	1.728			Minimum	0.978	0.07971
25% Percentile	0.8927	24.07			25% Percentile	0.9628	5.506			25% Percentile	0.8269	1.739			25% Percentile	0.9835	0.08374
Median	1	32.58			Median	1	9.701			Median	0.9798	2.174			Median	1	0.1558
75% Percentile	1.024	37.29			75% Percentile	1.007	18.68			75% Percentile	1	6.815			75% Percentile	1.037	0.3841
Maximum	1.098	39.24			Maximum	1.028	31.28			Maximum	1	6.855			Maximum	1.049	0.4402
Mean	0.9674	30.93			Mean	0.9828	12.44			Mean	0.9354	3.579			Mean	1.007	0.2079
Std. Deviation	0.1083	7.57			Std. Deviation	0.05347	10.08			Std. Deviation	0.0859	2.53			Std. Deviation	0.0301	0.1664
Std. Error of Mean	0.04421	3.09			Std. Error of Mean	0.02183	4.117			Std. Error of Mean	0.03507	1.033			Std. Error of Mean	0.01505	0.08318
Lower 95% CI of mean	0.8538	22.99			Lower 95% CI of mean	0.9267	1.856			Lower 95% CI of mean	0.8452	0.924			Lower 95% CI of mean	0.9589	-0.05683
Upper 95% CI of mean	1.081	38.88			Upper 95% CI of mean	1.039	23.02			Upper 95% CI of mean	1.026	6.234			Upper 95% CI of mean	1.055	0.4726
Sum	5.805	185.6			Sum	5.897	74.63			Sum	5.612	21.47			Sum	4.027	0.8315
Column B	hEPSC + ACL				Column B	hEPSC + ACL				Column B	hEPSC-ACL				Column B	hEPSC + ACL
vs.	vs.				vs.	vs.				vs.	vs.				vs.	vs.
Column A	hEPSC				Column A	hEPSC				Column A	hEPSC				Column A	hEPSC
Mann Whitney test					Mann Whitney test					Unpaired t test with Welch's correction					Mann Whitney test
P value	0.0022				P value	0.0022				P value	0.0507				P value	0.0286
Exact or approximate P value?	Exact				Exact or approximate P value?	Exact				P value summary	ns				Exact or approximate P value?	Exact
P value summary	**				P value summary	**				Significantly different (P < 0.05)?	No				P value summary	*
Significantly different (P < 0.05)?	Yes				Significantly different (P < 0.05)?	Yes				One- or two-tailed P value?	Two-tailed				Significantly different (P < 0.05)?	Yes
One- or two-tailed P value?	Two-tailed				One- or two-tailed P value?	Two-tailed				Welch-corrected t, df	t=2.558 df=5.012				One- or two-tailed P value?	Two-tailed
Sum of ranks in column A,B	21 , 57				Sum of ranks in column A,B	21 , 57									Sum of ranks in column A,B	26 , 10
Mann-Whitney U	0				Mann-Whitney U	0				How big is the difference?					Mann-Whitney U	0
										Mean ± SEM of column A	0.9354 ± 0.03507, n=6
Difference between medians					Difference between medians					Mean ± SEM of column B	3.579 ± 1.033, n=6				Difference between medians
Median of column A	1, n=6				Median of column A	1, n=6				Difference between means	2.644 ± 1.033				Median of column A	1, n=4
Median of column B	32.58, n=6				Median of column B	9.701, n=6				95% confidence interval	-0.01107 to 5.299				Median of column B	0.1558, n=4
Difference: Actual	31.58				Difference: Actual	8.701				R squared (eta squared)	0.5663				Difference: Actual	-0.8442
Difference: Hodges-Lehmann	31.65				Difference: Hodges-Lehmann	8.748									Difference: Hodges-Lehmann	-0.8578

## Sheet: F1F, G
Fluorescence intensity analysis of SOX2 and SOX17 in RUES2 Rset treated with ACL for 6 days using Fiji
Units = Fluorescence intensity (a.u.)
	Exp 1	Average fluorescence intensity (A.U.)	99.0128	0.499713	1	1		Exp 1	Average fluorescence intensity (A.U.)	27.9896	26.1201	0.282687	52.2702			Exp 2	Average fluorescence intensity (A.U.)	50.8853	1.96823	1	1		Exp 2	Average fluorescence intensity (A.U.)	10.8153	35.6093	0.212542	18.0921			Exp 3	Average fluorescence intensity (A.U.)	62.0269	0.44823	1	1		Exp 3	Average fluorescence intensity (A.U.)	10.7482	53.4185	0.173282	119.176
	Control	Standard Deviation	36.2124	1.44364	0.365734	2.88894		ACL	Standard Deviation	11.8641	29.3206	0.119824	58.6749			Control	Standard Deviation	18.68	8.61443	0.3671	4.37674		ACL	Standard Deviation	13.2012	34.1683	0.25943	17.3599			Control	Standard Deviation	34.8545	1.48866	0.561926	3.32121		ACL	Standard Deviation	9.04631	42.8179	0.145845	95.5267				SOX2
			SOX2	SOX17	rel SOX2	rel SOX17				SOX2	SOX17	rel SOX2	rel SOX17					SOX2	SOX17	rel SOX2	rel SOX17				SOX2	SOX17	rel SOX2	rel SOX17					SOX2	SOX17	rel SOX2	rel SOX17				SOX2	SOX17	rel SOX2	rel SOX17					Rset	Rset-ACL
			68.953	2.97	0.696405	5.94341				28.233	0.01	0.285145	0.0200115					30.656	0.204	0.602452	0.103646				72.658	24.201	1.42788	12.2958					43.731	0.108	0.705033	0.240948				10.869	73.912	0.17523	164.897				Number of values	2749	3146
			65.701	2.775	0.66356	5.55319				37.51	0.034	0.37884	0.0680391					26.27	0.135	0.516259	0.0685895				73.58	23.735	1.446	12.0591					36.735	0.092	0.592243	0.205252				13.684	89.529	0.220614	199.739
			54.141	9.823	0.546808	19.6573				21.323	10.001	0.215356	20.0135					41.663	0.22	0.818762	0.111775				33.68	13.051	0.66188	6.63083					36.276	0.104	0.584843	0.232024				13.866	89.016	0.223548	198.594				Minimum	0.03829	0.01128
			76.926	2.596	0.77693	5.19498				25.067	0.709	0.253169	1.41882					42.871	0.219	0.842502	0.111267				35.147	12.737	0.69071	6.47129					46.822	0.082	0.754866	0.182942				6.898	40.857	0.11121	91.1519				25% Percentile	0.6522	0.08638
			63.65	2.866	0.642846	5.7353				29.77	0.078	0.300668	0.15609					36.189	0.196	0.711187	0.0995818				36.644	0.115	0.720129	0.0584281					32.993	0.111	0.531914	0.247641				7.806	42.606	0.125849	95.0539				Median	0.9296	0.1674
			66.911	4.163	0.675781	8.33079				26.642	0.019	0.269076	0.0380218					47.837	0.224	0.940094	0.113808				31.927	12.008	0.62743	6.10091					21.057	0.133	0.339482	0.296723				8.552	39.063	0.137876	87.1494				75% Percentile	1.269	0.3102
			66.967	2.681	0.676347	5.36508				26.117	0.016	0.263774	0.0320184					39.38	0.208	0.773897	0.105679				76.061	27.563	1.49475	14.0039					27.231	0.132	0.439019	0.294492				7.377	40.212	0.118932	89.7129				Maximum	3.007	2.526
			56.826	5.991	0.573926	11.9889				32.657	0.026	0.329826	0.0520299					39.278	0.211	0.771892	0.107203				12.427	0.092	0.244216	0.0467425					32.475	0.11	0.523563	0.24541				7.375	43.291	0.1189	96.5821
			73.616	2.518	0.7435	5.0389				23.705	0.016	0.239413	0.0320184					30.632	0.232	0.601981	0.117872				76.322	24.802	1.49988	12.6012					25.396	0.125	0.409435	0.278875				14.682	79.156	0.236704	176.597				Mean	1	0.22
			79.287	3.103	0.800775	6.20957				29.999	0.016	0.302981	0.0320184					32.741	0.289	0.643427	0.146832				106.936	38.486	2.10151	19.5536					40.522	0.098	0.653297	0.218638				6.321	27.607	0.101907	61.5911				Std. Deviation	0.4738	0.1931
			72.076	3.452	0.727946	6.90797				29.562	0.022	0.298567	0.0440253					58.15	0.223	1.14277	0.1133				31.188	11.157	0.612907	5.66854					21.888	0.118	0.352879	0.263258				12.625	88.261	0.203541	196.91				Std. Error of Mean	0.009036	0.003443
			62.296	2.728	0.629171	5.45914				16.938	1.435	0.171069	2.87165					54.417	0.198	1.0694	0.100598				117.482	40.876	2.30876	20.7679					28.48	0.108	0.459156	0.240948				13.088	0.097	0.211005	0.216407
			36.587	2.583	0.369518	5.16897				26.25	0.048	0.265117	0.0960552					53.821	0.226	1.05769	0.114824				105.404	37.757	2.0714	19.1832					22.084	0.179	0.356039	0.399349				11.111	81.785	0.179132	182.462				Lower 95% CI of mean	0.9823	0.2133
			78.65	2.765	0.794342	5.53318				37.909	0.016	0.38287	0.0320184					45.929	0.227	0.902598	0.115332				58.986	20.771	1.15919	10.5531					25.587	0.275	0.412515	0.613524				8.158	48.702	0.131524	108.654				Upper 95% CI of mean	1.018	0.2268
			59.825	3.852	0.604215	7.70843				30.757	0.049	0.310637	0.0980563					45.819	0.213	0.900436	0.108219				69.962	25.83	1.37489	13.1235					30.427	0.098	0.490545	0.218638				13.652	91.606	0.220098	204.373
			65.423	5.826	0.660753	11.6587				23.599	0.044	0.238343	0.0880506					50.845	0.255	0.999207	0.129558				20.21	0.13	0.397167	0.0660491					27.89	0.129	0.449644	0.287799				8.543	51.134	0.137731	114.08				Sum	2749	692.3
			61.338	3.594	0.619495	7.19213				19.652	0.088	0.198479	0.176101					40.188	0.258	0.789776	0.131082				92.496	31.979	1.81773	16.2476					39.212	0.116	0.632177	0.258796				15.596	91.382	0.251439	203.873
			66.055	2.603	0.667136	5.20899				30.264	0.015	0.305657	0.0300172					15.858	0.188	0.311642	0.0955172				19.331	0.134	0.379893	0.0680814					40.778	0.1	0.657424	0.2231				12.161	83.682	0.19606	186.694				D'Agostino & Pearson normality test
			64.558	2.348	0.652017	4.6987				31.068	0.011	0.313778	0.0220126					27.889	0.25	0.548075	0.127018				35.534	0.121	0.698315	0.0614765					33.756	0.106	0.544215	0.236486				15.443	104.103	0.248973	232.254				K2	211.4	2582
			72.119	2.323	0.72838	4.64867				29.662	11.625	0.299577	23.2634					41.03	0.239	0.806323	0.121429				65.84	21.062	1.29389	10.701					31.857	0.115	0.5136	0.256565				8.628	40.795	0.139101	91.0135				P value	<0.0001	<0.0001
			72.001	3.946	0.727189	7.89654				28.551	0.024	0.288357	0.0480276					50.323	0.228	0.988949	0.11584				33.889	0.097	0.665987	0.0492828					36.055	0.148	0.58128	0.330188				11.401	71.403	0.183807	159.3				Passed normality test (alpha=0.05)?	No	No
			79.805	3.296	0.806007	6.59579				28.991	0.014	0.2928	0.0280161					51.6	0.219	1.01404	0.111267				29.9	9.93	0.587596	5.04514					33.826	0.13	0.545344	0.29003				14.457	84.634	0.233076	188.818				P value summary	****	****
			59.143	10.471	0.597327	20.954				22.611	0.118	0.228364	0.236136					50.098	0.24	0.984527	0.121937				79.787	29.406	1.56798	14.9403					21.638	0.121	0.348849	0.269951				8.156	42.698	0.131491	95.2591
			67.424	2.832	0.680962	5.66726				29.561	1.451	0.298557	2.90367					56.545	0.228	1.11122	0.11584				40.226	0.121	0.790522	0.0614765					22.877	0.1	0.368824	0.2231				5.241	14.56	0.0844956	32.4833
			72.481	2.692	0.732036	5.3871				18.599	7.703	0.187844	15.4149					45.14	0.264	0.887092	0.134131				39.473	12.301	0.775724	6.24977					31.794	0.13	0.512584	0.29003				7.582	2.193	0.122237	4.89258
			60.143	2.658	0.607426	5.31906				39.508	0.021	0.399019	0.0420241					56.642	0.206	1.11313	0.104662				78.141	27.473	1.53563	13.9582					31.819	0.115	0.512987	0.256565				9.067	51.184	0.146178	114.191				Column B	Rset-ACL
			70.855	2.515	0.715614	5.03289				31.286	0.023	0.315979	0.0460264					51.979	0.24	1.02149	0.121937				63.026	20.075	1.23859	10.1995					19.473	0.098	0.313944	0.218638				10.014	59.014	0.161446	131.66				vs.	vs.
			63.755	27.034	0.643906	54.0991				24.95	0.128	0.251988	0.256147					51.073	0.204	1.00369	0.103646				39.68	13.08	0.779792	6.64556					21.4	0.101	0.345012	0.225331				9.748	51.203	0.157158	114.234				Column A	Rset
			64.156	2.726	0.647956	5.45513				37.313	0.018	0.37685	0.0360207					56.067	0.239	1.10183	0.121429				108.657	36.433	2.13533	18.5105					22.176	0.133	0.357522	0.296723				12.482	64.772	0.201235	144.506
			69.998	2.701	0.706959	5.40511				26.447	0.017	0.267107	0.0340195					51.457	0.243	1.01123	0.123461				56.377	17.58	1.10792	8.93188					38.476	0.14	0.620311	0.31234				11.493	80.333	0.185291	179.223				Mann Whitney test
			69.264	3.359	0.699546	6.72186				17.255	0.024	0.17427	0.0480276					46.873	0.2	0.921149	0.101614				24.189	3.901	0.475363	1.98198					36.328	0.102	0.585681	0.227562				12.256	80.106	0.197592	178.716				P value	<0.0001
			61.293	3.643	0.619041	7.29019				18.314	0.028	0.184966	0.0560322					48.1	0.251	0.945262	0.127526				26.903	0.132	0.528698	0.0670653					29.6	0.111	0.477212	0.247641				12.656	78.398	0.20404	174.906				Exact or approximate P value?	Approximate
			64.403	2.349	0.650451	4.7007				34.327	0.202	0.346692	0.404232					41.963	0.213	0.824658	0.108219				18.76	2.302	0.368672	1.16958					27.112	0.122	0.437101	0.272182				10.5	62.258	0.169281	138.897				P value summary	****
			75.401	3.113	0.761528	6.22958				32.849	0.03	0.331765	0.0600345					47.738	0.268	0.938148	0.136163				5.512	0.149	0.108322	0.0757025					44.372	0.073	0.715367	0.162863				8.645	56.625	0.139375	126.33				Significantly different (P < 0.05)?	Yes
			97.949	3.463	0.989256	6.92998				21.327	0.02	0.215396	0.040023					51.392	0.242	1.00996	0.122953				35.644	0.11	0.700477	0.0558877					32.631	0.152	0.526078	0.339112				7.595	37.93	0.122447	84.6217				One- or two-tailed P value?	Two-tailed
			80.065	3.85	0.808633	7.70443				14.504	0.086	0.146486	0.172099					42.905	0.25	0.84317	0.127018				61.137	18.676	1.20147	9.48872					36.682	0.124	0.591388	0.276644				8.493	51.761	0.136924	115.479				Sum of ranks in column A,B	12114498 , 5263963
			60.606	2.97	0.612103	5.94341				21.759	0.026	0.219759	0.0520299					36.079	0.233	0.709025	0.11838				52.866	17.949	1.03892	9.11936					29.499	0.112	0.475584	0.249872				15.549	96.997	0.250682	216.4				Mann-Whitney U	313732
			88.365	3.038	0.89246	6.07949				24.687	0.014	0.249331	0.0280161					37.546	0.204	0.737855	0.103646				92.011	31.37	1.8082	15.9382					24.633	0.111	0.397134	0.247641				11.29	86.41	0.182018	192.78
			79.184	3.244	0.799735	6.49173				28.93	0.855	0.292184	1.71098					50.442	0.206	0.991287	0.104662				48.378	0.147	0.950726	0.0746863					28.217	0.091	0.454915	0.203021				12.86	71.885	0.207329	160.375				Difference between medians
			82.403	2.886	0.832246	5.77532				28.819	0.016	0.291063	0.0320184					48.335	0.238	0.949881	0.120921				27.004	0.156	0.530683	0.079259					28.62	0.109	0.461413	0.243179				8.718	48.944	0.140552	109.194				Median of column A	0.9296, n=2749
			73.069	3.138	0.737975	6.27961				39.446	0.106	0.398393	0.212122					37.142	0.26	0.729915	0.132098				46.491	0.187	0.913642	0.0950092					41.757	0.091	0.673208	0.203021				7.379	29.936	0.118964	66.7871				Median of column B	0.1674, n=3146
			39.395	4.123	0.397878	8.25074				54.896	26.657	0.554433	53.3446					55.413	0.251	1.08898	0.127526				34.656	0.14	0.681061	0.0711299					27.769	0.186	0.447693	0.414965				14.071	85.39	0.226853	190.505				Difference: Actual	-0.7622
			65.999	2.391	0.66657	4.78475				15.965	0.019	0.161242	0.0380218					44.443	0.237	0.873395	0.120413				128.54	47.245	2.52607	24.0038					20.767	0.165	0.334806	0.368115				9.993	67.36	0.161107	150.28				Difference: Hodges-Lehmann	-0.7207
			52.554	2.468	0.53078	4.93884				10.17	0.03	0.102714	0.0600345					51.161	0.22	1.00542	0.111775				77.722	28.775	1.52739	14.6197					36.948	0.103	0.595677	0.229793				12.717	85.125	0.205024	189.914
			65.059	3.335	0.657076	6.67383				35.08	0.036	0.354298	0.0720414					47.72	0.271	0.937795	0.137687				53.856	17.337	1.05838	8.80842					40.962	0.11	0.660391	0.24541				13.707	0.084	0.220985	0.187404
			62.26	3.084	0.628807	6.17155				24.798	0.023	0.250452	0.0460264					49.014	0.239	0.963224	0.121429				30.626	0.161	0.601863	0.0817993					26.97	0.187	0.434811	0.417196				13.141	73.992	0.21186	165.076
			85.324	2.723	0.861747	5.44913				25.823	11.777	0.260805	23.5675					50.323	0.275	0.988949	0.139719				45.598	15.056	0.896093	7.64951					27.382	0.175	0.441454	0.390425				8.837	48.294	0.14247	107.744
			81.343	2.888	0.82154	5.77932				20.369	0.017	0.205721	0.0340195					37.408	0.319	0.735143	0.162074				21.699	0.111	0.426429	0.0563958					42.541	0.092	0.685847	0.205252				12.832	83.89	0.206878	187.158
			79.738	2.718	0.80533	5.43913				28.764	0.017	0.290508	0.0340195					33.975	0.306	0.667678	0.15547				12.813	1.001	0.251801	0.508578					32.073	0.115	0.517082	0.256565				11.171	70.117	0.180099	156.431
			63.236	2.746	0.638665	5.49516				11.107	0.062	0.112177	0.124071					56.278	0.236	1.10598	0.119905				29.526	0.167	0.580246	0.0848478					28.087	0.116	0.45282	0.258796				11.389	69.017	0.183614	153.977
			86.397	2.992	0.872584	5.98744				22.788	0.021	0.230152	0.0420241					33.489	0.253	0.658127	0.128542				23.519	0.144	0.462196	0.0731621					24.093	0.167	0.388428	0.372577				10.732	51.581	0.173022	115.077
			78.84	2.85	0.79626	5.70328				17.174	0.015	0.173452	0.0300172					40.025	0.355	0.786572	0.180365				15.565	1.312	0.305884	0.666588					36.674	0.087	0.59126	0.194097				10.97	66.929	0.176859	149.318
			92.837	2.797	0.937626	5.59722				11.707	0.161	0.118237	0.322185					39.605	0.258	0.778318	0.131082				33.277	0.177	0.65396	0.0899285					40.937	0.094	0.659988	0.209714				7.539	49.363	0.121544	110.129
			69.726	3.111	0.704212	6.22558				20.089	0.026	0.202893	0.0520299					36.459	0.463	0.716493	0.235237				36.407	0.16	0.715471	0.0812913					34.179	0.102	0.551035	0.227562				10.086	72.623	0.162607	162.022
			79.614	2.896	0.804078	5.79533				25.986	0.021	0.262451	0.0420241					52.206	0.206	1.02595	0.104662				21.206	0.151	0.416741	0.0767186					31.204	0.144	0.503072	0.321264				6.864	32.33	0.110662	72.1281
			78.716	4.134	0.795008	8.27275				32.19	15.022	0.325109	30.0613					44.407	0.207	0.872687	0.105171				45.97	16.381	0.903404	8.3227					27.081	0.594	0.436601	1.32521				12.633	71.741	0.20367	160.054
			70.883	3.239	0.715897	6.48172				35.539	0.019	0.358933	0.0380218					36.305	0.275	0.713467	0.139719				21.957	0.171	0.431499	0.08688					30.132	0.144	0.485789	0.321264				6.971	42.29	0.112387	94.3489
			65.578	3.387	0.662318	6.77789				15.647	0.406	0.15803	0.812467					42.213	0.222	0.829571	0.112792				25.904	0.118	0.509066	0.0599523					39.27	0.137	0.633112	0.305647				10.808	60.8	0.174247	135.645
			58.002	2.926	0.585803	5.85536				32.724	0.019	0.330503	0.0380218					45.167	0.254	0.887623	0.12905				18.456	0.187	0.362698	0.0950092					33.998	0.237	0.548117	0.528746				9.343	57.27	0.150628	127.769
			68.551	2.963	0.692345	5.92941				31.295	0.012	0.31607	0.0240138					49.611	0.2	0.974957	0.101614				61.025	15.88	1.19926	8.06816					36.115	0.125	0.582247	0.278875				12.553	81.334	0.20238	181.456
			90.96	2.924	0.918669	5.85136				18.164	0.026	0.183451	0.0520299					14.64	0.21	0.287706	0.106695				22.625	0.136	0.444627	0.0690976					25.594	0.354	0.412627	0.789773				13.517	75.88	0.217922	169.288
			85.171	3.186	0.860202	6.37566				29.978	0.151	0.302769	0.302174					13.536	0.242	0.26601	0.122953				32.187	0.134	0.63254	0.0680814					31.651	0.121	0.510279	0.269951				10.784	64.708	0.17386	144.363
			78.503	3.079	0.792857	6.16154				28.578	0.011	0.288629	0.0220126					57.554	0.078	1.13105	0.0396295				18.987	0.224	0.373133	0.113808					41.72	0.119	0.672611	0.265489				10.114	58.607	0.163058	130.752
			78.831	3.074	0.79617	6.15153				20.255	0.02	0.204569	0.040023					75.803	0.13	1.48968	0.0660491				29.821	0.144	0.586043	0.0731621					32.701	0.12	0.527207	0.26772				9.902	57.907	0.15964	129.19
			80.54	2.324	0.81343	4.65067				21.505	0.03	0.217194	0.0600345					58.325	0.115	1.1462	0.0584281				29.121	0.15	0.572287	0.0762106					28.583	0.102	0.460816	0.227562				9.898	68.742	0.159576	153.363
			74.74	2.243	0.754852	4.48858				26.131	0.022	0.263915	0.0440253					44.554	0.09	0.875576	0.0457263				29.641	0.125	0.582506	0.0635088					22.206	0.238	0.358006	0.530977				9.863	61.962	0.159012	138.237
			86.817	2.642	0.876826	5.28704				34.643	0.018	0.349884	0.0360207					52.467	0.129	1.03108	0.0655411				37.797	0.135	0.742788	0.0685895					25.682	0.124	0.414046	0.276644				8.267	55.897	0.133281	124.706
			72.766	2.982	0.734915	5.96743				28.775	0.019	0.290619	0.0380218					56.932	0.086	1.11883	0.0436941				14.464	0.352	0.284247	0.178841					28.063	0.104	0.452433	0.232024				13.311	77.331	0.2146	172.525
			72.574	2.384	0.732976	4.77074				51.65	0.014	0.52165	0.0280161					46.754	0.079	0.918811	0.0401376				13.72	0.303	0.269626	0.153945					30.812	0.088	0.496752	0.196328				10.881	59.639	0.175424	133.054
			83.122	2.728	0.839507	5.45914				14.249	0.018	0.143911	0.0360207					45.791	0.117	0.899886	0.0594442				3.532	43.686	0.0694109	22.1956					24.01	0.143	0.38709	0.319033				18.18	114.699	0.293099	255.893
			81.903	2.543	0.827196	5.08892				10.945	0.134	0.110541	0.268154					82.912	0.097	1.62939	0.0492828				13.735	0.042	0.269921	0.021339					28.112	0.442	0.453223	0.986101				30.195	0.082	0.486805	0.182942
			78.193	2.592	0.789726	5.18698				24.958	0.031	0.252068	0.0620356					53.233	0.083	1.04614	0.0421698				7.373	88.421	0.144894	44.9241					32.218	0.109	0.51942	0.243179				10.447	64.118	0.168427	143.047
			63.74	2.371	0.643755	4.74473				27.491	0.012	0.277651	0.0240138					67.135	0.113	1.31934	0.057412				4.372	54.069	0.0859186	27.4709					30.151	0.369	0.486095	0.823238				11.847	100.133	0.190998	223.396
			80.71	2.623	0.815147	5.24902				30.959	0.036	0.312677	0.0720414					72.647	0.059	1.42766	0.0299762				27.013	0.085	0.53086	0.043186					30.87	0.096	0.497687	0.214176				11.42	65.004	0.184114	145.024
			73.968	2.853	0.747055	5.70928				27.833	0.092	0.281105	0.184106					8.654	0.146	0.170069	0.0741783				17.962	0.777	0.35299	0.394771					35.731	0.137	0.576056	0.305647				6.593	0.133	0.106293	0.296723
			73.667	2.496	0.744015	4.99487				36.448	0.019	0.368114	0.0380218					104.946	0.109	2.0624	0.0553797				7.251	0.026	0.142497	0.0132098					38.377	0.111	0.618715	0.247641				40.278	230.136	0.649363	513.433
			72.13	2.797	0.728491	5.59722				27.251	0.114	0.275227	0.228131					55.783	0.105	1.09625	0.0533474				16.949	0.036	0.333082	0.0182905					31.348	0.129	0.505394	0.287799				7.765	55.298	0.125188	123.37
			61.043	2.484	0.616516	4.97086				20.101	0.014	0.203014	0.0280161					65.44	0.102	1.28603	0.0518232				10.807	0.085	0.212379	0.043186					38.194	0.152	0.615765	0.339112				8.524	65.441	0.137424	145.999
			76.98	2.969	0.777475	5.94141				32.612	0.027	0.329371	0.054031					74.134	0.09	1.45688	0.0457263				12.712	0.06	0.249817	0.0304842					24.769	0.164	0.399327	0.365884				11.901	65.563	0.191868	146.271
			74.106	3.039	0.748448	6.08149				10.764	0.021	0.108713	0.0420241					71.95	0.119	1.41396	0.0604604				16.599	2.563	0.326204	1.30218					28.545	0.225	0.460203	0.501974				14.181	106.403	0.228627	237.385
			63.306	2.152	0.639372	4.30647				16.674	0.034	0.168402	0.0680391					76.26	0.116	1.49866	0.0589362				21.821	0.035	0.428827	0.0177825					30.95	0.148	0.498977	0.330188				3.973	45.841	0.0640528	102.271
			81.387	2.45	0.821984	4.90282				34.926	0.027	0.352742	0.054031					33.525	0.108	0.658834	0.0548716				4.329	2.373	0.0850736	1.20565					32.238	0.122	0.519742	0.272182				15.932	78.503	0.256856	175.14
			87.388	2.883	0.882593	5.76931				30.537	0.013	0.308415	0.0260149					62.913	0.12	1.23637	0.0609684				13.847	0.17	0.272122	0.086372					30.398	0.135	0.490078	0.301185				12.704	79.018	0.204814	176.289
			67.71	2.583	0.683851	5.16897				20.173	0.29	0.203741	0.580333					45.225	0.126	0.888763	0.0640169				18.873	0.053	0.370893	0.0269277					39.366	0.114	0.63466	0.254334				10.477	75.229	0.168911	167.836
			69.633	0.041	0.703273	0.0820471				24.501	0.023	0.247453	0.0460264					88.419	0.085	1.73761	0.043186				13.023	0.09	0.255928	0.0457263					29.036	0.113	0.468119	0.252103				13.384	83.516	0.215777	186.324
			89.571	0.064	0.90464	0.128074				45.615	0.022	0.460698	0.0440253					38.176	0.119	0.750236	0.0604604				17.387	0.955	0.34169	0.485207					32.415	0.126	0.522596	0.281106				9.646	71.913	0.155513	160.438
			60.435	0.052	0.610375	0.10406				31.816	0.018	0.321332	0.0360207					80.122	0.099	1.57456	0.050299				19.742	0.554	0.38797	0.281471					37.482	0.89	0.604286	1.98559				6.998	83.317	0.112822	185.88
			70.401	0.044	0.711029	0.0880506				21.686	0.105	0.219022	0.210121					56.797	0.097	1.11618	0.0492828				18.594	0.043	0.36541	0.021847					28.999	0.099	0.467523	0.220869				17.489	134.187	0.281958	299.371
			68.291	0.048	0.689719	0.0960552				18.622	0.015	0.188077	0.0300172					74.011	0.094	1.45447	0.0477586				15.682	0.042	0.308183	0.021339					31.098	0.169	0.501363	0.377039				6.473	52.202	0.104358	116.463
			67.187	0.046	0.678569	0.0920529				37.149	0.018	0.375194	0.0360207					51.355	0.155	1.00923	0.0787509				20.27	0.046	0.398347	0.0233712					27.869	0.141	0.449305	0.314571				4.327	45.187	0.06976	100.812
			76.4	0.034	0.771617	0.0680391				24.634	0.023	0.248796	0.0460264					80.315	0.089	1.57835	0.0452183				4.252	62.236	0.0835604	31.6203					31.013	0.154	0.499993	0.343574				7.966	78.775	0.128428	175.747
			68.518	0.058	0.692011	0.116067				34.379	0.019	0.347218	0.0380218					51.135	0.153	1.00491	0.0777348				23.896	0.071	0.469605	0.036073					29.547	0.102	0.476358	0.227562				13.928	139.946	0.224548	312.219
			87.054	0.051	0.879219	0.102059				23.508	0.037	0.237424	0.0740425					84.554	0.116	1.66166	0.0589362				21.96	0.037	0.431558	0.0187986					29.371	0.276	0.47352	0.615755				10.854	143.105	0.174989	319.267
			79.389	0.069	0.801805	0.138079				23.303	0.049	0.235353	0.0980563					47.061	0.132	0.924844	0.0670653				23.612	0.168	0.464024	0.0853558					27.048	0.528	0.436069	1.17797				7.307	78.26	0.117804	174.598
			71.083	0.046	0.717917	0.0920529				19.858	0.052	0.20056	0.10406					49.795	0.127	0.978573	0.0645249				29.733	0.585	0.584314	0.297221					26.077	0.129	0.420414	0.287799				6.005	75.419	0.0968128	168.26
			70.048	0.051	0.707464	0.102059				29.219	0.223	0.295103	0.446256					54.021	0.095	1.06162	0.0482667				20.933	0.075	0.411376	0.0381053					32.428	0.197	0.522805	0.439506				7.172	82.217	0.115627	183.426
			72.964	0.048	0.736915	0.0960552				29.626	0.018	0.299214	0.0360207					47.923	0.127	0.941784	0.0645249				5.026	79.465	0.0987711	40.3738					33.029	0.155	0.532495	0.345805				7.142	81.618	0.115144	182.09
			69.724	0.042	0.704192	0.0840483				36.007	0.014	0.36366	0.0280161					73.147	0.137	1.43749	0.0696056				19.113	0.985	0.375609	0.500449					35.279	0.141	0.568769	0.314571				10.766	149.252	0.17357	332.981
			75.983	0.057	0.767406	0.114066				28.666	0.037	0.289518	0.0740425					64.458	0.151	1.26673	0.0767186				28.688	0.047	0.563777	0.0238793					33.022	0.105	0.532382	0.234255				6.417	89.67	0.103455	200.054
			75.151	0.125	0.759003	0.250144				16.205	0.023	0.163666	0.0460264					58.322	0.143	1.14615	0.0726541				24.14	0.165	0.4744	0.0838316					31.961	0.214	0.515276	0.477433				7.43	87.662	0.119787	195.574
			62.979	0.058	0.636069	0.116067				44.321	0.078	0.447629	0.15609					71.305	0.113	1.40129	0.057412				18.715	1.392	0.367788	0.707234					37.741	0.106	0.608462	0.236486				9.811	130.253	0.158173	290.594
			75.025	0.049	0.75773	0.0980563				28.595	0.019	0.288801	0.0380218					50.154	0.169	0.985628	0.0858639				14.775	0.082	0.290359	0.0416618					26.162	0.197	0.421785	0.439506				6.835	83.43	0.110194	186.132
			81.044	0.058	0.81852	0.116067				22.562	0.017	0.227869	0.0340195					47.761	0.089	0.9386	0.0452183				21.441	0.099	0.421359	0.050299					33.914	0.12	0.546763	0.26772				6.664	88.944	0.107437	198.434
			76.071	0.067	0.768294	0.134077				28.457	0.024	0.287407	0.0480276					81.437	0.12	1.6004	0.0609684				26.837	0.108	0.527401	0.0548716					18.662	0.203	0.300869	0.452892				7.568	95.185	0.122012	212.357
			70.668	0.04	0.713726	0.080046				16.906	0.191	0.170746	0.38222					40.66	0.169	0.799051	0.0858639				15.244	0.125	0.299575	0.0635088					38.835	0.101	0.626099	0.225331				6.956	107.33	0.112145	239.453
			59.781	0.043	0.60377	0.0860494				29.143	0.015	0.294336	0.0300172					31.293	0.149	0.614971	0.0757025				27.132	0.04	0.533199	0.0203228					30.751	0.124	0.495769	0.276644				6.763	107.352	0.109033	239.502
			74.71	0.068	0.754549	0.136078				33.921	0.026	0.342592	0.0520299					60.899	0.138	1.19679	0.0701137				19.55	1.424	0.384197	0.723492					25.292	0.288	0.407759	0.642527				5.976	85.67	0.0963453	191.13
			48.725	0.038	0.492108	0.0760437				31.895	0.014	0.32213	0.0280161					79.304	0.086	1.55848	0.0436941				15.094	0.223	0.296628	0.1133					29.204	0.239	0.470828	0.533208				6.654	101.283	0.107276	225.962
			70.541	0.053	0.712443	0.106061				33.008	0.036	0.333371	0.0720414					53.085	0.198	1.04323	0.100598				23.74	0.585	0.466539	0.297221					18.065	0.551	0.291245	1.22928				8.226	95.553	0.13262	213.178
			74.743	0.068	0.754882	0.136078				17.61	0.024	0.177856	0.0480276					35.5	0.193	0.697647	0.0980576				9.167	0.03	0.18015	0.0152421					32.781	0.097	0.528496	0.216407				2.924	28.123	0.0471408	62.7423
			74.295	0.06	0.750357	0.120069				35.235	0.038	0.355863	0.0760437					70.586	0.127	1.38716	0.0645249				25.043	0.049	0.492146	0.0248954					24.708	0.113	0.398343	0.252103				5.106	66.607	0.0823191	148.6
			69.087	0.049	0.697758	0.0980563				32.379	0.021	0.327018	0.0420241					57.254	0.278	1.12516	0.141244				27.444	0.037	0.53933	0.0187986					32.762	0.119	0.52819	0.265489				8.228	101.852	0.132652	227.232
			80.108	0.095	0.809067	0.190109				23.28	0.023	0.235121	0.0460264					45.768	0.125	0.899434	0.0635088				27.37	0.12	0.537876	0.0609684					29.031	0.243	0.468039	0.542132				5.26	65.688	0.0848019	146.55
			75.597	0.075	0.763507	0.150086				18.697	0.409	0.188834	0.81847					56.867	0.185	1.11755	0.093993				13.137	0.102	0.258169	0.0518232					20.968	0.56	0.338047	1.24936				6.352	75.481	0.102407	168.398
			60.626	0.051	0.612305	0.102059				37.45	0.011	0.378234	0.0220126					47.833	0.213	0.940015	0.108219				5.771	46.689	0.113412	23.7213					8.191	0.173	0.132056	0.385963				7.137	108.778	0.115063	242.683
			68.023	0.056	0.687012	0.112064				14.4	0.013	0.145436	0.0260149					46.048	0.118	0.904936	0.0599523				26.92	0.269	0.529032	0.136671					23.638	0.546	0.381093	1.21812				7.206	110.996	0.116175	247.632
			83.904	0.055	0.847405	0.110063				20.331	0.011	0.205337	0.0220126					37.661	0.197	0.740115	0.10009				21.849	0.263	0.429377	0.133623					36.645	0.112	0.590792	0.249872				8.512	134.754	0.137231	300.636
			68.499	0.059	0.691819	0.118068				29.866	0.094	0.301638	0.188108					53.853	0.201	1.05832	0.102122				17.003	1.68	0.334143	0.853558					34.763	0.251	0.56045	0.55998				7.726	104.131	0.124559	232.316
			75.043	0.065	0.757912	0.130075				46.553	0.084	0.470171	0.168097					60.48	0.162	1.18855	0.0823074				9.58	0.036	0.188266	0.0182905					22.908	0.414	0.369324	0.923633				6.78	79.699	0.109307	177.808
			76.357	0.059	0.771183	0.118068				19.388	0.02	0.195813	0.040023					50.724	0.155	0.996829	0.0787509				24.46	0.248	0.480689	0.126001					25.382	0.46	0.409209	1.02626				2.73	35.152	0.0440132	78.424
			69.66	0.051	0.703545	0.102059				25.721	0.081	0.259774	0.162093					52.376	0.176	1.02929	0.0894204				2.328	33.915	0.0457499	17.2312					31.355	0.108	0.505506	0.240948				4.221	52.328	0.0680511	116.744
			77.34	0.104	0.781111	0.20812				20.027	0.039	0.202267	0.0780448					48.808	0.172	0.959176	0.0873881				12.726	0.036	0.250092	0.0182905					27.205	0.133	0.4386	0.296723				4.613	66.669	0.0743709	148.738
			81.837	0.114	0.826529	0.228131				28.181	0.016	0.28462	0.0320184					42.026	0.155	0.825896	0.0787509				21.302	0.098	0.418627	0.0497909					38.71	0.1	0.624084	0.2231				5.861	75.581	0.0944912	168.621
			39.821	0.067	0.40218	0.134077				26.831	0.023	0.270985	0.0460264					53.615	0.206	1.05364	0.104662				27.007	1.004	0.530742	0.510103					27.539	0.142	0.443985	0.316802				7.447	103.37	0.120061	230.618
			80.118	0.054	0.809168	0.108062				53.806	0.155	0.543425	0.310178					46.804	0.159	0.919793	0.0807832				26.342	0.043	0.517674	0.021847					35.707	0.098	0.57567	0.218638				8.608	110.281	0.138778	246.037
			15.36	0.432	0.155131	0.864497				36.866	18.532	0.372336	37.0853					69.528	0.225	1.36637	0.114316				27.708	0.045	0.544518	0.0228632					25.417	0.174	0.409774	0.388194				5.265	64.772	0.0848825	144.506
			46.901	0.069	0.473686	0.138079				29.369	0.022	0.296618	0.0440253					50.596	0.192	0.994314	0.0975495				15.973	0.054	0.313902	0.0274358					28.392	0.148	0.457737	0.330188				5.749	72.642	0.0926856	162.064
			69.854	0.069	0.705505	0.138079				21.499	0.1	0.217133	0.200115					52.285	0.187	1.02751	0.0950092				15.981	0.633	0.314059	0.321609					33.128	0.079	0.534091	0.176249				3.432	43.992	0.0553308	98.146
			79.478	0.079	0.802704	0.158091				16.476	0.03	0.166403	0.0600345					37.389	0.193	0.73477	0.0980576				21.228	0.046	0.417173	0.0233712					35.111	0.134	0.566061	0.298954				2.463	29.786	0.0397086	66.4525
			52.351	0.077	0.528729	0.154089				26.26	0.02	0.265218	0.040023					63.713	0.223	1.25209	0.1133				18.079	0.635	0.355289	0.322625					21.735	0.4	0.350412	0.892399				7.294	85.785	0.117594	191.386
			67.314	0.068	0.679851	0.136078				22.325	0.025	0.225476	0.0500287					52.622	0.171	1.03413	0.08688				23.417	0.269	0.460191	0.136671					21.082	0.755	0.339885	1.6844				7.403	87.527	0.119351	195.273
			61.422	0.065	0.620344	0.130075				42.089	0.015	0.425086	0.0300172					59.295	0.105	1.16527	0.0533474				10.878	66.054	0.213775	33.5601					35.049	0.109	0.565061	0.243179				5.988	81.648	0.0965387	182.156
			74.764	0.058	0.755094	0.116067				21.725	0.217	0.219416	0.43425					40.294	0.165	0.791859	0.0838316				8.798	0.209	0.172899	0.106187					27.174	0.499	0.4381	1.11327				7.551	128.113	0.121737	285.82
			42.007	0.084	0.424258	0.168097				23.431	10.379	0.236646	20.7699					49.528	0.205	0.973325	0.104154				10.279	0.071	0.202003	0.036073					29.484	0.141	0.475342	0.314571				2.936	27.95	0.0473343	62.3564
			55.084	0.059	0.556332	0.118068				36.123	0.016	0.364832	0.0320184					26.611	0.163	0.52296	0.0828155				22.127	0.163	0.43484	0.0828155					31.14	0.11	0.50204	0.24541				11.001	145.654	0.177359	324.954
			70.524	0.058	0.712271	0.116067				18.529	0.837	0.187137	1.67496					68.775	0.225	1.35157	0.114316				11.659	0.209	0.229123	0.106187					34.765	0.109	0.560483	0.243179				5.566	76.315	0.0897352	170.259
			68.357	0.09	0.690385	0.180103				33.315	0.065	0.336472	0.130075					54.79	0.144	1.07673	0.0731621				9.385	26.234	0.184434	13.3287					27.979	0.101	0.451078	0.225331				4.466	52.363	0.072001	116.822
			59.892	0.063	0.604891	0.126072				27.234	0.019	0.275055	0.0380218					44.832	0.165	0.88104	0.0838316				7.051	59.181	0.138566	30.0681					33.761	0.124	0.544296	0.276644				2.837	39.582	0.0457382	88.3073
			55.069	0.072	0.55618	0.144083				26.417	0.029	0.266804	0.0580333					43.879	0.205	0.862311	0.104154				10.662	77.785	0.20953	39.5203					38.085	0.111	0.614008	0.247641				8.674	114.912	0.139843	256.368
			75.005	0.075	0.757528	0.150086				41.073	0.028	0.414825	0.0560322					38.481	0.234	0.75623	0.118888				3.394	18.844	0.066699	9.57408					34.189	0.117	0.551196	0.261027				7.926	123.725	0.127783	276.03
			75.009	0.068	0.757569	0.136078				28.124	0.022	0.284044	0.0440253					38.463	0.16	0.755876	0.0812913				11.028	82.233	0.216723	41.7802					40.033	0.109	0.645413	0.243179				7.918	103.345	0.127654	230.562
			76.588	0.074	0.773516	0.148085				25.532	0.031	0.257866	0.0620356					49.577	0.092	0.974288	0.0467425				4.968	0.076	0.0976313	0.0386133					31.328	0.095	0.505071	0.211945				6.668	85.371	0.107502	190.462
			76.719	0.049	0.774839	0.0980563				20.059	0.018	0.20259	0.0360207					72.296	0.091	1.42076	0.0462344				14.57	0.057	0.28633	0.02896					21.704	0.167	0.349913	0.372577				3.716	46.847	0.0599095	104.516
			58.447	0.062	0.590297	0.124071				37.432	0.013	0.378052	0.0260149					69.953	0.087	1.37472	0.0442021				29.755	1.153	0.584746	0.585805					28.271	0.156	0.455786	0.348036				7.251	105.72	0.116901	235.861
			78.934	0.084	0.79721	0.168097				19.406	0.048	0.195995	0.0960552					73.477	0.108	1.44397	0.0548716				4.563	0.066	0.0896722	0.0335326					14.109	0.167	0.227466	0.372577				8.598	112.727	0.138617	251.494
			76.031	0.054	0.76789	0.108062				25.876	0.179	0.26134	0.358206					69.82	0.086	1.3721	0.0436941				4.271	45.826	0.0839338	23.2828					37.276	0.104	0.600965	0.232024				6.069	83.734	0.0978446	186.81
			80.137	0.082	0.80936	0.164094				52.132	0.015	0.526518	0.0300172					56.25	0.111	1.10543	0.0563958				6.287	63.073	0.123552	32.0455					28.704	0.256	0.462767	0.571135				5.455	68.874	0.0879457	153.658
			53.025	0.053	0.535537	0.106061				24.231	0.022	0.244726	0.0440253					54.133	0.089	1.06382	0.0452183				6.462	67.179	0.126991	34.1317					36.319	0.275	0.585536	0.613524				7.528	101.659	0.121367	226.801
			72.673	0.063	0.733976	0.126072				50.549	0.022	0.51053	0.0440253					59.292	0.1	1.16521	0.050807				4.395	45.832	0.0863706	23.2859					36.156	0.088	0.582908	0.196328				3.426	43.805	0.0552341	97.7288
			68.095	0.083	0.687739	0.166095				27.86	0.016	0.281378	0.0320184					54.75	0.123	1.07595	0.0624927				5.659	63.409	0.111211	32.2162					34.043	0.115	0.548842	0.256565				6.481	84.49	0.104487	188.497
			37.553	0.057	0.379274	0.114066				26.323	0.029	0.265854	0.0580333					50.508	0.088	0.992584	0.0447102				4.244	45.041	0.0834032	22.884					33.756	0.103	0.544215	0.229793				6.934	80.679	0.11179	179.995
			82.991	0.085	0.838184	0.170098				36.722	0.022	0.370881	0.0440253					62.189	0.091	1.22214	0.0462344				11.168	126.348	0.219474	64.1937					30.032	0.179	0.484177	0.399349				10.654	129.07	0.171764	287.955
			53.937	0.065	0.544748	0.130075				21.984	0.018	0.222032	0.0360207					63.336	0.099	1.24468	0.050299				13.032	0.068	0.256105	0.0345488					30.05	0.124	0.484467	0.276644				6.299	75.839	0.101553	169.197
			83.702	0.041	0.845365	0.0820471				20.64	0.449	0.208458	0.898516					59.733	0.09	1.17387	0.0457263				11.375	131.66	0.223542	66.8925					14.878	0.228	0.239864	0.508667				7.233	84.706	0.116611	188.979
			82.267	0.054	0.830872	0.108062				37.154	0.022	0.375244	0.0440253					60.09	0.09	1.18089	0.0457263				9.147	46.473	0.179757	23.6116					26.735	0.143	0.431023	0.319033				8.45	100.508	0.136231	224.233
			75.596	0.07	0.763497	0.14008				18.208	1.708	0.183895	3.41796					74.058	0.061	1.45539	0.0309923				7.481	86.82	0.147017	44.1107					35.265	0.137	0.568544	0.305647				5.093	73.952	0.0821095	164.987
			63.011	0.07	0.636392	0.14008				23.801	0.337	0.240383	0.674387					57.724	0.095	1.13439	0.0482667				8.408	0.066	0.165234	0.0335326					38.754	0.109	0.624793	0.243179				12.458	163.431	0.200848	364.614
			86.185	0.083	0.870443	0.166095				40.136	0.026	0.405362	0.0520299					63.668	0.094	1.25121	0.0477586				7.943	49.054	0.156096	24.9229					32.021	0.093	0.516244	0.207483				6.123	75.956	0.0987152	169.458
			80.606	0.062	0.814097	0.124071				27.602	0.015	0.278772	0.0300172					64.411	0.095	1.26581	0.0482667				7.696	87.46	0.151242	44.4358					36.987	0.173	0.596306	0.385963				2.94	43.49	0.0473988	97.0261
			69.859	0.09	0.705555	0.180103				22.915	0.038	0.231435	0.0760437					62.596	0.088	1.23014	0.0447102				10.465	122.718	0.205658	62.3494					26.265	0.181	0.423445	0.403811				8.335	111.102	0.134377	247.868
			88.125	0.078	0.890036	0.15609				33.662	0.016	0.339976	0.0320184					76.206	0.088	1.4976	0.0447102				21.969	0.06	0.431735	0.0304842					29.921	0.213	0.482387	0.475202				6.973	99.819	0.112419	222.696
			90.55	0.081	0.914528	0.162093				31.534	0.033	0.318484	0.0660379					56.114	0.098	1.10275	0.0497909				8.658	44.928	0.170147	22.8266					21.811	0.219	0.351638	0.488588				5.71	66.728	0.0920568	148.87
			78.496	0.09	0.792786	0.180103				44.484	0.057	0.449275	0.114066					65.155	0.088	1.28043	0.0447102				7.771	48.599	0.152716	24.6917					33.997	0.14	0.548101	0.31234				3.616	48.219	0.0582973	107.576
			88.26	0.06	0.8914	0.120069				42.25	0.013	0.426712	0.0260149					71.029	0.119	1.39586	0.0604604				19.84	0.058	0.389896	0.0294681					29.38	0.181	0.473665	0.403811				4.391	73.308	0.0707919	163.55
			68.137	0.061	0.688163	0.12207				24.693	0.236	0.249392	0.472271					60.747	0.082	1.1938	0.0416618				20.702	0.541	0.406836	0.274866					36.351	0.12	0.586052	0.26772				5.767	70.069	0.0929758	156.324
			69.68	0.068	0.703747	0.136078				26.941	0.033	0.272096	0.0660379					68.782	0.083	1.35171	0.0421698				5.464	71.444	0.107379	36.2986					36.252	0.238	0.584456	0.530977				12.751	158.059	0.205572	352.629
			78.371	0.072	0.791524	0.144083				44.823	0.028	0.452699	0.0560322					67.381	0.099	1.32417	0.050299				11.608	0.061	0.228121	0.0309923					36.088	0.142	0.581812	0.316802				4.611	65.832	0.0743387	146.871
			52.373	0.044	0.528952	0.0880506				32.156	0.013	0.324766	0.0260149					47.613	0.088	0.935692	0.0447102				4.34	60.799	0.0852898	30.8902					39.424	0.109	0.635595	0.243179				8.363	0.036	0.134829	0.0803159
			76.493	0.074	0.772556	0.148085				22.537	0.045	0.227617	0.0900517					70.755	0.083	1.39048	0.0421698				23.597	0.054	0.463729	0.0274358					41.039	0.11	0.661632	0.24541				5.103	50.865	0.0822707	113.48
			75.603	0.071	0.763568	0.142082				30.693	0.023	0.30999	0.0460264					67.698	0.074	1.3304	0.0375972				4.579	51.742	0.0899866	26.2886					22.183	0.217	0.357635	0.484126				3.647	45.5	0.0587971	101.51
			78.769	0.106	0.795543	0.212122				7.326	0.053	0.0739904	0.106061					64.547	0.082	1.26848	0.0416618				22.833	0.063	0.448715	0.0320084					32.121	0.102	0.517856	0.227562				9.059	0.037	0.14605	0.0825469
			75.473	0.08	0.762255	0.160092				29.182	0.022	0.294729	0.0440253					60.811	0.081	1.19506	0.0411537				4.661	51.924	0.0915981	26.381					42.282	0.083	0.681672	0.185173				13.064	157.078	0.210618	350.441
			68.305	0.063	0.68986	0.126072				35.531	0.029	0.358852	0.0580333					65.813	0.075	1.29336	0.0381053				5.218	51.822	0.102544	26.3292					22.972	0.427	0.370355	0.952636				6.299	87.455	0.101553	195.112
			86.039	0.062	0.868968	0.124071				38.445	0.019	0.388283	0.0380218					52.581	0.079	1.03332	0.0401376				2.751	16.764	0.0540627	8.51729					36.565	0.111	0.589502	0.247641				5.898	66.619	0.0950878	148.627
			90.266	0.066	0.91166	0.132076				42.682	0.034	0.431075	0.0680391					65.404	0.079	1.28532	0.0401376				6.231	39.569	0.122452	20.1038					25.826	0.203	0.416368	0.452892				4.688	56.329	0.0755801	125.67
			67.629	0.066	0.683033	0.132076				46.774	0.009	0.472403	0.0180103					61.383	0.082	1.2063	0.0416618				15.781	0.062	0.310129	0.0315004					29.079	0.338	0.468813	0.754077				3.757	54.762	0.0605705	122.174
			92.9	0.077	0.938262	0.154089				30.576	0.017	0.308808	0.0340195					70.505	0.076	1.38557	0.0386133				4.991	67.229	0.0980833	34.1571					26.34	0.364	0.424654	0.812083				5.948	72.971	0.0958939	162.798
			78.447	0.074	0.792291	0.148085				38.069	0.021	0.384486	0.0420241					73.13	0.078	1.43715	0.0396295				4.023	41.208	0.0790601	20.9366					30.001	0.299	0.483677	0.667068				9.339	109.644	0.150564	244.615
			80.857	0.077	0.816632	0.154089				29.227	0.016	0.295184	0.0320184					73.198	0.089	1.43849	0.0452183				14.372	0.065	0.282439	0.0330246					33.386	0.126	0.53825	0.281106				26.948	0.055	0.434457	0.122705
			90.378	0.077	0.912791	0.154089				32.098	0.012	0.32418	0.0240138					56.09	0.079	1.10228	0.0401376				29.806	0.057	0.585748	0.02896					30.472	0.135	0.491271	0.301185				6.6	74.664	0.106405	166.575
			87.71	0.063	0.885845	0.126072				38.869	90.285	0.392565	180.674					53.054	0.11	1.04262	0.0558877				8.613	63.345	0.169263	32.1837					27.777	0.155	0.447822	0.345805				25.104	0.821	0.404728	1.83165
			85.186	0.081	0.860353	0.162093				7.08	13.451	0.0715059	26.9175					73.353	0.106	1.44153	0.0538555				19.979	0.116	0.392628	0.0589362					33.001	0.116	0.532043	0.258796				6.957	87.774	0.112161	195.824
			65.042	0.06	0.656905	0.120069				13.338	26.817	0.13471	53.6648					57.251	0.096	1.1251	0.0487748				6.157	78.716	0.120998	39.9933					38.478	0.152	0.620344	0.339112				8.132	91.656	0.131104	204.484
			80.732	0.065	0.815369	0.130075				9.814	14.063	0.0991185	28.1422					66.712	0.076	1.31103	0.0386133				26.447	0.057	0.519737	0.02896					27.685	0.231	0.446339	0.51536				11.715	175.392	0.18887	391.299
			84.17	0.074	0.850092	0.148085				1.16	0.642	0.0117157	1.28474					69.205	0.077	1.36002	0.0391214				43.082	0.063	0.846648	0.0320084					34.746	0.104	0.560176	0.232024				17.218	0.107	0.277589	0.238717
			84.378	0.071	0.852193	0.142082				13.731	28.094	0.138679	56.2203					65.108	0.067	1.2795	0.0340407				6.692	84.697	0.131511	43.032					34.38	0.187	0.554276	0.417196				4.105	48.418	0.066181	108.02
			63.925	0.055	0.645623	0.110063				1.926	0.1	0.019452	0.200115					68.42	0.091	1.34459	0.0462344				7.282	87.03	0.143106	44.2174					30.161	0.175	0.486257	0.390425				30.263	0.049	0.487901	0.109319
			90.095	0.072	0.909933	0.144083				3.994	0.603	0.0403382	1.20669					74.768	0.081	1.46934	0.0411537				15.022	0.064	0.295213	0.0325165					25.133	0.342	0.405195	0.763001				8.615	114.897	0.138891	256.335
			74.633	0.086	0.753771	0.172099				22.226	45.282	0.224476	90.6161					64.503	0.074	1.26761	0.0375972				17.085	0.079	0.335755	0.0401376					32.147	0.109	0.518275	0.243179				4.261	50.053	0.068696	111.668
			69.435	0.067	0.701273	0.134077				12.066	6.241	0.121863	12.4892					62.901	0.11	1.23613	0.0558877				7.758	85.873	0.15246	43.6295					26.775	0.196	0.431667	0.437275				4.43	71.619	0.0714206	159.782
			97.397	0.083	0.983681	0.166095				14.075	31.623	0.142153	63.2824					37.608	0.078	0.739073	0.0396295				22.329	0.058	0.43881	0.0294681					38.977	0.099	0.628389	0.220869				9.27	147.354	0.149451	328.746
			84.835	0.08	0.856808	0.160092				33.415	73.555	0.337482	147.195					64.509	0.095	1.26773	0.0482667				3.294	45.181	0.0647338	22.9551					38.729	0.129	0.62439	0.287799				7.154	105.856	0.115337	236.164
			71.937	0.082	0.726542	0.164094				15.035	33.305	0.151849	66.6483					64.519	0.099	1.26793	0.050299				5.828	88.21	0.114532	44.8169					23.239	0.167	0.37466	0.372577				28.803	0.027	0.464363	0.0602369
			104.1	0.074	1.05138	0.148085				15.558	30.985	0.157131	62.0056					40.474	0.094	0.795396	0.0477586				4.483	56.703	0.0881	28.8091					38.7	0.166	0.623923	0.370346				5.602	69.007	0.0903156	153.954
			77.787	0.045	0.785625	0.0900517				8.65	0.678	0.0873624	1.35678					64.063	0.079	1.25897	0.0401376				4.466	42.682	0.0877659	21.6855					23.858	0.141	0.38464	0.314571				3.507	56.13	0.05654	125.226
			63.451	0.056	0.640836	0.112064				7.136	0.277	0.0720715	0.554318					70.266	0.092	1.38087	0.0467425				5.057	70.122	0.0993803	35.6269					37.484	0.099	0.604318	0.220869				3.715	61.206	0.0598934	136.55
			78.783	0.078	0.795685	0.15609				14.881	31.604	0.150294	63.2443					77.523	0.105	1.52348	0.0533474				4.739	52.772	0.0931309	26.8119					26.516	0.69	0.427492	1.53939				3.726	61.157	0.0600707	136.441
			81.342	0.117	0.82153	0.234135				11.591	21.011	0.117066	42.0462					68.065	0.079	1.33761	0.0401376				1.799	30.52	0.035354	15.5063					28.541	0.295	0.460139	0.658144				7.225	82.682	0.116482	184.463
			75.47	0.1	0.762224	0.200115				12.78	28.489	0.129074	57.0108					63.939	0.088	1.25653	0.0447102				1.716	21.144	0.0337229	10.7426					29.839	0.233	0.481065	0.519822				6.097	80.796	0.098296	180.256
			69.409	0.092	0.70101	0.184106				16.172	34.505	0.163332	69.0497					59.958	0.076	1.1783	0.0386133				2.165	29.506	0.0425466	14.9911					36.253	0.089	0.584472	0.198559				29.869	0.16	0.481549	0.35696
			82.565	0.076	0.833882	0.152087				9.587	20.356	0.0968258	40.7354					79.527	0.078	1.56287	0.0396295				2.284	16.855	0.0448852	8.56353					23.749	0.193	0.382882	0.430582				19.042	0.23	0.306996	0.513129
			94.516	0.089	0.954583	0.178102				16.441	35.908	0.166049	71.8573					66.395	0.075	1.3048	0.0381053				5.116	87.858	0.10054	44.638					27.386	0.471	0.441518	1.0508				34.478	0.456	0.555856	1.01733
			84.922	0.064	0.857687	0.128074				26.022	59.148	0.262814	118.364					56.745	0.095	1.11515	0.0482667				3.595	53.408	0.070649	27.135					27.064	0.187	0.436327	0.417196				12.112	2.061	0.19527	4.59809
			97.875	0.085	0.988508	0.170098				13.84	0.591	0.13978	1.18268					63.988	0.079	1.25749	0.0401376				2.227	20.549	0.0437651	10.4403					29.075	0.533	0.468748	1.18912				23.311	0.115	0.375821	0.256565
			77.725	0.081	0.784999	0.162093				11.739	22.639	0.11856	45.304					62.144	0.103	1.22126	0.0523312				3.15	38.377	0.0619039	19.4982					25.308	0.123	0.408016	0.274413				21.616	0.059	0.348494	0.131629
			87.268	0.081	0.881381	0.162093				12.721	27.647	0.128478	55.3258					63.805	0.077	1.2539	0.0391214				1.665	22.175	0.0327206	11.2665					37.852	0.097	0.610251	0.216407				16.644	0.198	0.268335	0.441737
			89.56	0.079	0.904529	0.158091				17.63	29.678	0.178058	59.3901					71.471	0.099	1.40455	0.050299				3.587	49.107	0.0704918	24.9498					39.62	0.089	0.638755	0.198559				9.147	0.371	0.147468	0.8277
			79.022	0.079	0.798099	0.158091				8.049	18.268	0.0812925	36.557					73.694	0.095	1.44824	0.0482667				5.944	28.765	0.116812	14.6146					32.142	0.194	0.518194	0.432813				33.064	0.098	0.533059	0.218638
			68.489	0.081	0.691718	0.162093				12.273	17.454	0.123954	34.9281					58.456	0.079	1.14878	0.0401376				2.24	31.876	0.0440205	16.1953					35.057	0.123	0.56519	0.274413				8.002	0.586	0.129009	1.30736
			67.929	0.075	0.686063	0.150086				11.612	22.633	0.117278	45.292					69.19	0.089	1.35972	0.0452183				4.852	80.759	0.0953516	41.0313					34.302	0.068	0.553018	0.151708				20.455	1.669	0.329776	3.72353
			95.517	0.075	0.964693	0.150086				15.97	33.809	0.161292	67.6569					67.52	0.092	1.3269	0.0467425				4.384	65.244	0.0861545	33.1485					29.601	0.124	0.477228	0.276644				6.153	0.451	0.0991989	1.00618
			79.142	0.071	0.799311	0.142082				17.372	25.549	0.175452	51.1274					48.989	0.101	0.962733	0.0513151				4.208	60.729	0.0826957	30.8546					26.159	0.208	0.421736	0.464047				12.071	71.183	0.194609	158.809
			75.426	0.092	0.76178	0.184106				19.687	27.583	0.198833	55.1977					62.501	0.11	1.22827	0.0558877				3.216	42.41	0.0632009	21.5473					28.984	0.529	0.467281	1.1802				16.382	0.045	0.264111	0.100395
			83.924	0.078	0.847607	0.15609				15.364	20.919	0.155172	41.8621					79.654	0.106	1.56536	0.0538555				5.224	56.596	0.102662	28.7548					22.36	0.427	0.360489	0.952636				21.992	0.058	0.354556	0.129398
			93.226	0.079	0.941555	0.158091				16.79	36.696	0.169574	73.4342					60.906	0.09	1.19693	0.0457263				4.599	70.691	0.0903797	35.916					27.892	0.382	0.449676	0.852241				6.016	118.401	0.0969902	264.152
			76.868	0.091	0.776344	0.182105				13.003	18.563	0.131326	37.1473					55.083	0.068	1.08249	0.0345488				5.173	9.019	0.10166	4.58229					37.856	0.143	0.610316	0.319033				5.025	81.014	0.0810132	180.742
			87.131	0.086	0.879997	0.172099				14.871	0.378	0.150193	0.756435					70.886	0.067	1.39305	0.0340407				2.821	43.554	0.0554384	22.1285					40.057	0.098	0.6458	0.218638				4.416	96.376	0.0711949	215.015
			81.484	0.082	0.822964	0.164094				19.043	44.678	0.192329	89.4074					64.237	0.089	1.26239	0.0452183				2.361	31.467	0.0463984	15.9875					31.916	0.224	0.514551	0.499743				4.865	74.732	0.0784337	166.727
			73.701	0.078	0.744358	0.15609				12.056	15.769	0.121762	31.5561					65.113	0.102	1.2796	0.0518232				2.274	25.073	0.0446887	12.7388					36.526	0.107	0.588873	0.238717				31.224	0.438	0.503394	0.977177
			71.359	0.072	0.720705	0.144083				11.845	15.261	0.119631	30.5395					59.814	0.134	1.17547	0.0680814				5.466	73.404	0.107418	37.2944					35.923	0.123	0.579152	0.274413				29.672	0.051	0.478373	0.113781
			92.533	0.081	0.934556	0.162093				16.043	23.742	0.16203	47.5113					66.39	0.126	1.3047	0.0640169				2.461	29.344	0.0483636	14.9088					41.328	0.132	0.666291	0.294492				16.699	0.523	0.269222	1.16681
			81.755	0.085	0.825701	0.170098				12.839	17.587	0.12967	35.1942					60.198	0.122	1.18301	0.0619846				7.208	24.21	0.141652	12.3004					32.337	0.097	0.521338	0.216407				26.041	0.306	0.419834	0.682685
			93.389	0.078	0.943201	0.15609				19.894	27.414	0.200923	54.8595					64.672	0.114	1.27094	0.05792				6.446	22.643	0.126677	11.5042					27.518	0.132	0.443646	0.294492				13.521	0.194	0.217986	0.432813
			100.782	0.064	1.01787	0.128074				15.937	21.614	0.160959	43.2529					64.696	0.101	1.27141	0.0513151				25.685	0.469	0.504762	0.238285					30.437	0.134	0.490706	0.298954				5.047	110.475	0.0813679	246.469
			81.005	0.073	0.818126	0.146084				15.679	21.773	0.158353	43.571					55.093	0.099	1.08269	0.050299				11.738	0.074	0.230675	0.0375972					24.582	0.173	0.396312	0.385963				4.624	96.745	0.0745483	215.838
			74.817	0.07	0.755629	0.14008				38.772	67.371	0.391586	134.819					55.244	0.113	1.08566	0.057412				15.53	0.646	0.305196	0.328213					23.709	0.148	0.382237	0.330188				20.233	0.039	0.326197	0.0870089
			77.873	0.071	0.786494	0.142082				15.864	22.812	0.160222	45.6502					77.106	0.096	1.51529	0.0487748				2.517	39.681	0.0494641	20.1607					15.674	0.13	0.252697	0.29003				4.972	103.782	0.0801588	231.537
			84.287	0.062	0.851274	0.124071				10.226	21.065	0.10328	42.1542					67.127	0.105	1.31918	0.0533474				6.913	24.562	0.135854	12.4792					22.637	0.198	0.364955	0.441737				3.934	83.637	0.0634241	186.594
			75.731	0.082	0.764861	0.164094				13.742	28.844	0.13879	57.7212					62.984	0.076	1.23776	0.0386133				6.093	78.224	0.11974	39.7433					37.984	0.1	0.612379	0.2231				3.805	63.981	0.0613443	142.741
			94.476	0.071	0.954179	0.142082				10.792	22.138	0.108996	44.3015					51.531	0.076	1.01269	0.0386133				6.79	23.934	0.133437	12.1602					24.909	0.151	0.401584	0.336881				18.379	4.559	0.296307	10.1711
			81.47	0.082	0.822823	0.164094				23.565	37.343	0.237999	74.7289					58.378	0.092	1.14725	0.0467425				14.072	0.206	0.276543	0.104662					25.775	0.42	0.415545	0.937019				19.816	0.503	0.319474	1.12219
			65.574	0.079	0.662278	0.158091				15.576	27.636	0.157313	55.3038					51.024	0.09	1.00272	0.0457263				2.496	36.22	0.0490515	18.4023					41.95	0.099	0.676319	0.220869				2.081	31.675	0.03355	70.6668
			67.752	0.066	0.684275	0.132076				18.128	32.582	0.183087	65.2015					61.225	0.086	1.2032	0.0436941				2.88	40.689	0.0565978	20.6729					25.086	0.093	0.404437	0.207483				5.288	89.818	0.0852533	200.384
			76.663	0.068	0.774273	0.136078				23.152	31.743	0.233828	63.5225					61.41	0.107	1.20683	0.0543635				18.247	1.901	0.35859	0.965842					41.44	0.178	0.668097	0.397118				10.937	0.674	0.176327	1.50369
			85.269	0.074	0.861191	0.148085				14.304	30.276	0.144466	60.5868					68.059	0.104	1.3375	0.0528393				19.368	0.095	0.38062	0.0482667					28.369	0.799	0.457366	1.78257				6.683	141.608	0.107744	315.927
			87.915	0.08	0.887915	0.160092				13.348	27.955	0.134811	55.9421					83.466	0.092	1.64028	0.0467425				21.731	0.099	0.427058	0.050299					27.776	0.317	0.447806	0.707226				14.4	1.368	0.232157	3.052
			92.042	0.075	0.929597	0.150086				20.602	31.711	0.208074	63.4585					66.318	0.134	1.30328	0.0680814				2.352	33.81	0.0462216	17.1779					30.096	0.125	0.485209	0.278875				4.01	69.704	0.0646494	155.509
			86.04	0.076	0.868978	0.152087				14.383	17.88	0.145264	35.7806					81.446	0.094	1.60058	0.0477586				8.873	0.111	0.174372	0.0563958					47.206	0.132	0.761057	0.294492				14.843	1.825	0.239299	4.07157
			86.902	0.073	0.877684	0.146084				15.526	19.152	0.156808	38.326					56.823	0.092	1.11669	0.0467425				13.783	0.094	0.270864	0.0477586					16.924	0.134	0.272849	0.298954				4.273	63.252	0.0688895	141.115
			84.144	0.068	0.849829	0.136078				13.744	29.059	0.13881	58.1514					51.12	0.096	1.00461	0.0487748				4.037	53.2	0.0793352	27.0293					43.669	0.098	0.704033	0.218638				4.037	68.151	0.0650847	152.045
			82.672	0.077	0.834963	0.154089				20.929	30.972	0.211377	61.9796					55.219	0.093	1.08517	0.0472505				2.161	28.668	0.042468	14.5654					27.442	0.237	0.442421	0.528746				3.465	49.967	0.0558629	111.476
			86.336	0.061	0.871968	0.12207				32.036	50.47	0.323554	100.998					62.638	0.121	1.23096	0.0614765				20.864	0.098	0.41002	0.0497909					38.886	0.112	0.626921	0.249872				4.364	66.858	0.0703566	149.16
			79.997	0.061	0.807946	0.12207				21.102	29.559	0.213124	59.152					77.703	0.101	1.52702	0.0513151				3.326	43.564	0.0653626	22.1336					37.804	0.109	0.609477	0.243179				4.534	86.9	0.0730973	193.874
			98.799	0.062	0.99784	0.124071				25.03	38.441	0.252796	76.9262					55.558	0.096	1.09183	0.0487748				1.796	22.922	0.035295	11.646					31.536	0.178	0.508425	0.397118				16.969	1.503	0.273575	3.35319
			83.49	0.071	0.843224	0.142082				24.757	36.116	0.250038	72.2735					58.6	0.088	1.15161	0.0447102				4.184	39.001	0.0822241	19.8153					32.456	0.08	0.523257	0.17848				7.097	145.276	0.114418	324.11
			90.983	0.087	0.918901	0.1741				34.297	49.687	0.346389	99.4311					74.641	0.087	1.46685	0.0442021				22.546	1.228	0.443075	0.62391					27.12	0.457	0.43723	1.01957				7.273	150.312	0.117256	335.346
			90.751	0.075	0.916558	0.150086				31.102	49.79	0.314121	99.6372					75.52	0.096	1.48412	0.0487748				6.859	0.098	0.134793	0.0497909					29.119	0.116	0.469458	0.258796				4.019	59.051	0.0647945	131.743
			65.575	0.057	0.662288	0.114066				23.899	36.45	0.241373	72.9419					77.095	0.089	1.51507	0.0452183				32.461	0.101	0.637924	0.0513151					23.458	0.17	0.378191	0.37927				3.941	93.49	0.0635369	208.576
			75.703	0.097	0.764578	0.194112				27.019	42.46	0.272884	84.9688					63.284	0.085	1.24366	0.043186				18.656	0.09	0.366628	0.0457263					29.225	0.154	0.471166	0.343574				17.713	1.759	0.28557	3.92432
			93.209	0.088	0.941383	0.176101				28.788	40.745	0.29075	81.5368					68.432	0.112	1.34483	0.0569039				6.537	1.536	0.128465	0.780396					33.96	0.139	0.547504	0.310109				5.129	107.134	0.0826899	239.016
			93.09	0.074	0.940181	0.148085				22.12	30.192	0.223405	60.4187					85.351	0.135	1.67732	0.0685895				3.488	40.512	0.0685463	20.5829					35.55	0.17	0.573138	0.37927				4.141	65.823	0.0667613	146.851
			89.643	0.075	0.905368	0.150086				23.843	32.307	0.240807	64.6511					68.989	0.08	1.35577	0.0406456				34.047	0.118	0.669092	0.0599523					40.171	0.132	0.647638	0.294492				2.488	31.885	0.0401116	71.1353
			78.952	0.084	0.797392	0.168097				34.318	51.987	0.346602	104.034					64.794	0.099	1.27333	0.050299				2.286	19.24	0.0449245	9.77527					25.282	0.287	0.407597	0.640296				5.475	89.463	0.0882681	199.592
			93.731	0.132	0.946655	0.264152				48.953	77.234	0.494411	154.557					63.304	0.131	1.24405	0.0665572				4.031	50.024	0.0792173	25.4157					30.28	0.894	0.488175	1.99451				4.269	70.5	0.068825	157.285
			89.39	0.094	0.902812	0.188108				30.365	45.725	0.306677	91.5026					60.357	0.104	1.18614	0.0528393				27.63	0.245	0.542985	0.124477					37.661	0.152	0.607172	0.339112				5.098	0.163	0.0821901	0.363653
			67.747	0.073	0.684224	0.146084				21.853	28.627	0.220709	57.2869					68.822	0.086	1.35249	0.0436941				27.88	0.065	0.547898	0.0330246					34.809	0.099	0.561192	0.220869				21.556	0.721	0.347527	1.60855
			101.86	0.07	1.02876	0.14008				26.281	36.115	0.26543	72.2715					69.849	0.104	1.37267	0.0528393				21.294	0.069	0.41847	0.0350569					35.578	0.115	0.57359	0.256565				22.43	0.453	0.361617	1.01064
			87.577	0.084	0.884502	0.168097				39.284	57.575	0.396757	115.216					75.258	0.096	1.47897	0.0487748				29.329	5.402	0.576374	2.7446					36.188	0.134	0.583424	0.298954				11.972	8.677	0.193013	19.3584
			86.508	0.126	0.873705	0.252145				35.531	56.284	0.358852	112.633					59.173	0.09	1.16287	0.0457263				11.126	1.301	0.218648	0.661					26.094	0.288	0.420688	0.642527				26.124	0.839	0.421172	1.87181
			112.21	0.131	1.13329	0.262151				27.448	35.164	0.277217	70.3684					57.255	0.078	1.12518	0.0396295				27.315	0.1	0.536795	0.050807					25.626	0.915	0.413143	2.04136				14.4	2.15	0.232157	4.79664
			84.931	0.08	0.857778	0.160092				23.556	32.941	0.237909	65.9199					72.037	0.084	1.41567	0.0426779				25.79	0.102	0.506826	0.0518232					36.217	0.156	0.583892	0.348036				33.966	1.462	0.547601	3.26172
			80.997	0.082	0.818046	0.164094				24.451	35.333	0.246948	70.7066					74.951	0.127	1.47294	0.0645249				33.412	0.089	0.656613	0.0452183					30.468	0.177	0.491206	0.394887				33.259	0.176	0.536203	0.392656
			92.704	0.082	0.936283	0.164094				46.439	69.193	0.46902	138.466					71.958	0.086	1.41412	0.0436941				23.437	1.501	0.460584	0.762614					25.662	0.188	0.413724	0.419427				12.672	0.74	0.204298	1.65094
			51.135	0.16	0.516448	0.320184				43.72	62.518	0.441559	125.108					75.663	0.094	1.48693	0.0477586				4.256	45.499	0.083639	23.1167					31.015	0.175	0.500025	0.390425				21.741	0.408	0.350509	0.910247
			76.834	0.161	0.776	0.322185				22.238	32.065	0.224597	64.1669					71.265	0.085	1.4005	0.043186				4.636	59.345	0.0911068	30.1514					25.88	0.179	0.417238	0.399349				21.121	0.267	0.340514	0.595676
			95.547	0.128	0.964996	0.256147				36.047	53.14	0.364064	106.341					58.963	0.113	1.15874	0.057412				6.08	0.113	0.119484	0.057412					33.67	0.16	0.542829	0.35696				19.13	0.159	0.308415	0.354729
			83.765	0.077	0.846002	0.154089				19.035	24.985	0.192248	49.9987					61.704	0.077	1.21261	0.0391214				18.563	0.076	0.364801	0.0386133					42.848	0.19	0.690797	0.423889				4.391	82.812	0.0707919	184.753
			54.703	0.124	0.552484	0.248143				17.661	22.929	0.178371	45.8844					66.568	0.115	1.3082	0.0584281				5.354	68.998	0.105217	35.0558					25.02	0.388	0.403373	0.865627				17.664	0.313	0.28478	0.698302
			68.674	0.099	0.693587	0.198114				23.978	31.655	0.242171	63.3464					73.611	0.096	1.44661	0.0487748				6.055	71.772	0.118993	36.4652					28.535	0.166	0.460042	0.370346				16.568	0.121	0.26711	0.269951
			86.351	0.123	0.872119	0.246141				30.458	44.014	0.307617	88.0786					59.39	0.088	1.16713	0.0447102				35.096	0.095	0.689707	0.0482667					36.822	0.093	0.593646	0.207483				6.82	134.484	0.109952	300.033
			45.132	0.119	0.45582	0.238137				33.505	49.132	0.338391	98.3205					72.361	0.083	1.42204	0.0421698				28.866	0.061	0.567275	0.0309923					34.126	0.134	0.550181	0.298954				4.706	58.487	0.0758703	130.484
			78.493	0.196	0.792756	0.392225				49.414	71.032	0.499067	142.146					56.227	0.099	1.10497	0.050299				3.834	60.766	0.0753459	30.8734					17.743	0.522	0.286053	1.16458				7.301	121.812	0.117707	271.762
			40.941	0.095	0.413492	0.190109				29.649	42.706	0.299446	85.4611					66.878	0.09	1.31429	0.0457263				15.514	0.049	0.304881	0.0248954					28.125	0.141	0.453432	0.314571				30.721	0.48	0.495285	1.07088
			55.001	0.113	0.555494	0.22613				33.96	49.034	0.342986	98.1244					72.597	0.114	1.42668	0.05792				3.442	36.366	0.0676423	18.4765					33.334	0.22	0.537412	0.490819				11.234	0.063	0.181115	0.140553
			53.432	0.137	0.539647	0.274158				13.337	15.738	0.1347	31.4941					87.347	0.094	1.71655	0.0477586				6.643	72.32	0.130548	36.7437					27.103	0.37	0.436956	0.825469				4.426	49.434	0.0713561	110.287
			69.296	0.117	0.699869	0.234135				34.751	50.431	0.350975	100.92					61.807	0.093	1.21463	0.0472505				3.794	38.246	0.0745598	19.4317					32.809	0.116	0.528948	0.258796				4.856	64.088	0.0782886	142.98
			59.214	0.094	0.598044	0.188108				31.293	46.821	0.31605	93.6958					64.236	0.082	1.26237	0.0416618				5.393	44.597	0.105983	22.6584					38.069	0.135	0.61375	0.301185				7.49	128.418	0.120754	286.5
			72.93	0.09	0.736571	0.180103				22.504	29.547	0.227284	59.128					58.838	0.097	1.15629	0.0492828				8.762	0.43	0.172191	0.21847					29.86	0.114	0.481404	0.254334				4.674	51.847	0.0753544	115.671
			81.946	0.14	0.82763	0.280161				25.689	38.115	0.259451	76.2738					68.955	0.089	1.35511	0.0452183				4.577	56.926	0.0899473	28.9224					45.384	0.14	0.731682	0.31234				4.052	52.181	0.0653265	116.416
			82.961	0.127	0.837881	0.254146				27.946	39.087	0.282246	78.2189					66.939	0.084	1.31549	0.0426779				7.216	79.056	0.141809	40.166					35.211	0.175	0.567673	0.390425				6.789	101.851	0.109452	227.229
			79.417	0.128	0.802088	0.256147				29.042	41.061	0.293316	82.1692					85.679	0.101	1.68377	0.0513151				28.677	0.063	0.563561	0.0320084					39.396	0.178	0.635144	0.397118				6.142	72.733	0.0990215	162.267
			82.052	0.092	0.828701	0.184106				27.067	37.329	0.273369	74.7009					76.433	0.099	1.50206	0.050299				6.878	61.195	0.135167	31.0914					31.571	0.127	0.508989	0.283337				7.881	139.212	0.127058	310.582
			74.183	0.213	0.749226	0.426245				16.205	20.051	0.163666	40.1251					73.633	0.105	1.44704	0.0533474				4.507	36.429	0.0885717	18.5085					23.968	0.815	0.386413	1.81826				6.033	71.76	0.0972642	160.096
			73.21	0.113	0.739399	0.22613				29.865	42.175	0.301628	84.3985					72.431	0.102	1.42342	0.0518232				4.933	53.347	0.0969434	27.104					31.309	0.128	0.504765	0.285568				6.144	12.548	0.0990538	27.9946
			79.904	0.135	0.807007	0.270155				19.449	25.503	0.196429	51.0353					58.067	0.088	1.14113	0.0447102				4.788	41.388	0.0940939	21.028					25.661	0.125	0.413708	0.278875				30.931	0.413	0.498671	0.921402
			44.711	0.105	0.451568	0.210121				44.791	69.46	0.452376	139					64.71	0.094	1.27168	0.0477586				9.369	110.68	0.18412	56.2332					34.941	0.139	0.56332	0.310109				3.96	49.628	0.0638433	110.72
			97.464	0.098	0.984357	0.196113				49.851	77.256	0.50348	154.601					72.422	0.096	1.42324	0.0487748				5.828	46.754	0.114532	23.7543					29.208	0.186	0.470892	0.414965				17.522	0.455	0.28249	1.0151
			77.02	0.102	0.777879	0.204117				20.761	28.908	0.20968	57.8492					66.548	0.086	1.3078	0.0436941				27.519	0.817	0.540804	0.415094					38.146	0.115	0.614991	0.256565				23.757	0.049	0.383011	0.109319
			37.801	0.225	0.381779	0.450259				22.717	29.964	0.229435	59.9625					57.421	0.099	1.12844	0.050299				5.316	60.034	0.10447	30.5015					23.6	0.143	0.38048	0.319033				5.244	80.684	0.084544	180.006
			35.182	0.133	0.355328	0.266153				22.223	29.941	0.224446	59.9164					73.615	0.118	1.44668	0.0599523				6.903	71.253	0.135658	36.2015					23.55	0.173	0.379674	0.385963				13.722	3.764	0.221227	8.39747
			81.524	0.116	0.823368	0.232133				57.144	89.296	0.577137	178.695					54.26	0.092	1.06632	0.0467425				4.506	20.672	0.088552	10.5028					24.132	0.145	0.389057	0.323495				10.317	1.729	0.166331	3.85739
			44.651	0.144	0.450962	0.288166				36.458	54.536	0.368215	109.135					63.44	0.082	1.24672	0.0416618				4.491	55.611	0.0882572	28.2543					25.194	0.147	0.406179	0.327957				20.735	0.61	0.33429	1.36091
			59.678	0.12	0.60273	0.240138				29.688	40.868	0.29984	81.783					58.675	0.1	1.15308	0.050807				7.655	82.089	0.150436	41.707					23.514	0.163	0.379094	0.363653				5.393	73.513	0.0869461	164.007
			44.401	0.139	0.448437	0.27816				38.252	54.984	0.386334	110.031					12.287	0.183	0.241464	0.0929769				7.317	87.877	0.143794	44.6477					23.096	0.721	0.372355	1.60855				29.434	0.214	0.474536	0.477433
			95.456	0.185	0.964077	0.370213				20.944	28.753	0.211528	57.5391					5.762	29.369	0.113235	14.9215				10.314	0.122	0.202691	0.0619846					39.713	0.133	0.640254	0.296723				6.087	77.834	0.0981348	173.647
			66.804	0.168	0.6747	0.336193				35.862	54.814	0.362195	109.691					4.496	37.04	0.0883555	18.8189				4.445	51.065	0.0873532	25.9446					40.647	0.128	0.655312	0.285568				30.052	0.403	0.484499	0.899092
			61.551	0.096	0.621647	0.19211				29.566	44.261	0.298608	88.5729					4.142	40.182	0.0813987	20.4153				17.66	10.957	0.347055	5.56693					23.655	0.141	0.381367	0.314571				22.327	0.052	0.359957	0.116012
			84.976	0.084	0.858232	0.168097				42.788	61.494	0.432146	123.059					5.833	53.917	0.11463	27.3936				8.125	64.321	0.159673	32.6796					36.605	0.178	0.590147	0.397118				29.458	0.323	0.474923	0.720612
			55.425	0.098	0.559776	0.196113				31.256	45.082	0.315676	90.2158					5.478	47.259	0.107654	24.0109				5.06	56.465	0.0994392	28.6882					35.897	0.111	0.578733	0.247641				25.252	0.642	0.407114	1.4323
			63.58	0.115	0.642139	0.230132				33.374	50.321	0.337067	100.7					4.266	0.301	0.0838355	0.152929				4.654	50.266	0.0914605	25.5387					25.028	0.151	0.403502	0.336881				22.586	0.524	0.364132	1.16904
			95.325	0.135	0.962754	0.270155				37.827	55.523	0.382041	111.11					6.918	59.396	0.135953	30.1773				5.609	61.744	0.110228	31.3703					42.2	0.115	0.68035	0.256565				2.729	36.77	0.043997	82.0338
			58.185	0.093	0.587651	0.186107				38.317	56.025	0.38699	112.114					5.115	51.168	0.10052	25.9969				3.764	29.883	0.0739702	15.1827					24.483	0.193	0.394716	0.430582				27.492	0.827	0.443227	1.84503
			96.508	0.14	0.974702	0.280161				44.487	69.346	0.449305	138.772					5.637	0.445	0.110778	0.226091				7.545	84.717	0.148275	43.0422					28.015	0.153	0.451659	0.341343				28.663	0.829	0.462106	1.8495
			55.676	0.115	0.562311	0.230132				49.655	74.969	0.501501	150.024					3.146	0.152	0.0618253	0.0772267				4.423	53.513	0.0869209	27.1884					39.789	0.145	0.64148	0.323495				4.71	66.441	0.0759348	148.23
			91.084	0.097	0.919921	0.194112				31.636	44.615	0.319514	89.2813					4.522	41.483	0.0888665	21.0763				5.084	58.399	0.0999109	29.6708					25.762	0.129	0.415336	0.287799				21.722	0.66	0.350203	1.47246
			72.166	0.113	0.728855	0.22613				17.936	40.804	0.181148	81.6549					5.249	54.552	0.103153	27.7163				30.22	0.107	0.593884	0.0543635					32.211	0.136	0.519307	0.303416				4.361	76.001	0.0703082	169.558
			78.392	0.136	0.791736	0.272156				16.896	36.983	0.170645	74.0085					6.364	35.213	0.125065	17.8907				6.236	56.67	0.12255	28.7923					24.07	0.137	0.388057	0.305647				25.336	0.437	0.408468	0.974946
			92.124	0.116	0.930425	0.232133				35.047	0.27	0.353964	0.54031					4.616	38.825	0.0907137	19.7258				3.945	47.014	0.0775272	23.8864					26.489	0.593	0.427057	1.32298				15.851	3.416	0.25555	7.62109
			87.555	0.091	0.884279	0.182105				38.647	0.133	0.390323	0.266153					6.297	70.855	0.123749	35.9993				4.006	38.387	0.078726	19.5033					28.038	0.218	0.45203	0.486357				6.168	78.098	0.0994407	174.236
			39.661	0.103	0.400564	0.206118				17.829	33.47	0.180068	66.9785					10.535	0.307	0.207034	0.155978				6.222	39.517	0.122275	20.0774					23.78	0.261	0.383382	0.58229				23.283	0.737	0.375369	1.64425
			54.84	0.142	0.553868	0.284163				26.912	58.753	0.271803	117.574					9.933	0.312	0.195204	0.158518				8.426	93.014	0.165588	47.2577					31.757	0.177	0.511987	0.394887				19.826	0.053	0.319635	0.118243
			77.785	0.112	0.785605	0.224129				41.271	0.125	0.416825	0.250144					9.986	0.298	0.196245	0.151405				5.737	37.487	0.112744	19.046					41.39	0.146	0.667291	0.325726				19.38	0.841	0.312445	1.87627
			77.387	0.153	0.781586	0.306176				19.235	42.629	0.194268	85.307					11.042	0.299	0.216998	0.151913				13.092	67.708	0.257284	34.4004					26.754	0.168	0.431329	0.374808				22.99	0.971	0.370646	2.1663
			64.969	0.147	0.656168	0.294169				18.456	40.482	0.1864	81.0105					8.965	0.268	0.17618	0.136163				6.399	51.623	0.125753	26.2281					30.695	0.159	0.494866	0.354729				19.644	0.253	0.316701	0.564442
			46.568	0.082	0.470323	0.164094				17.363	36.002	0.175361	72.0454					38.143	0.099	0.749587	0.050299				6.025	59.222	0.118403	30.0889					34.821	0.131	0.561385	0.292261				5.563	66.648	0.0896869	148.692
			68.348	0.12	0.690294	0.240138				32.027	72.186	0.323463	144.455					46.796	0.071	0.919636	0.036073				6.568	74.466	0.129074	37.834					36.692	0.126	0.59155	0.281106				15.4	0.19	0.248279	0.423889
			98.314	0.129	0.992942	0.258148				32.989	0.282	0.333179	0.564324					33.445	0.085	0.657262	0.043186				4.879	38.973	0.0958822	19.801					35.564	0.123	0.573364	0.274413				13.551	0.584	0.21847	1.3029
			17.544	0.246	0.177189	0.492283				31.143	70.06	0.314535	140.201					32.834	0.382	0.645255	0.194083				6.086	45.13	0.119602	22.9292					33.881	0.151	0.546231	0.336881				23.002	0.436	0.370839	0.972715
			71.5	0.117	0.722129	0.234135				37.44	84.886	0.378133	169.87					35.153	0.056	0.690828	0.0284519				5.93	58.385	0.116537	29.6637					23.367	0.19	0.376724	0.423889				13.233	0.405	0.213343	0.903554
			32.78	0.095	0.331068	0.190109				55.765	0.157	0.56321	0.314181					32.232	0.067	0.633424	0.0340407				5.352	44.886	0.105178	22.8052					25.1	0.136	0.404663	0.303416				24.63	0.193	0.397086	0.430582
			73.137	0.101	0.738662	0.202116				20.783	44.648	0.209902	89.3473					33.534	0.071	0.659011	0.036073				7.998	76.476	0.157177	38.8552					43.032	0.13	0.693763	0.29003				11.404	0.131	0.183856	0.292261
			97.743	0.124	0.987175	0.248143				22.972	50.316	0.23201	100.69					34.614	0.068	0.680235	0.0345488				6.793	41.173	0.133496	20.9188					26.981	0.113	0.434989	0.252103				24.82	0.342	0.400149	0.763001
			66.016	0.112	0.666742	0.224129				21.265	45.126	0.21477	90.3039					35.078	0.065	0.689354	0.0330246				8.319	43.027	0.163485	21.8607					30.691	0.226	0.494801	0.504205				5.443	77.977	0.0877522	173.966
			37.165	0.093	0.375355	0.186107				20.689	43.546	0.208953	87.1421					39.328	0.033	0.772875	0.0167663				6.115	41.796	0.120172	21.2353					33.256	0.145	0.536154	0.323495				20.251	2.536	0.326487	5.65781
			46.689	0.172	0.471545	0.344198				41.257	0.17	0.416683	0.340195					26.641	0.117	0.52355	0.0594442				9.389	77.287	0.184513	39.2672					24.674	0.175	0.397795	0.390425				26.302	0.683	0.424042	1.52377
			70.598	0.144	0.713019	0.288166				29.759	65.572	0.300557	131.219					32.364	0.067	0.636018	0.0340407				7.69	48.958	0.151124	24.8741					41.132	0.117	0.663132	0.261027				30.691	0.27	0.494801	0.602369
			29.667	0.136	0.299628	0.272156				21.249	45.997	0.214609	92.0469					41.961	0.097	0.824619	0.0492828				10.57	67.181	0.207722	34.1327					41.87	0.121	0.67503	0.269951				3.017	2.157	0.0486402	4.81226
			53.127	0.125	0.536567	0.250144				26.466	59.885	0.267299	119.839					25.133	0.069	0.493914	0.0350569				10.112	42.515	0.198721	21.6006					28.853	0.186	0.465169	0.414965				28.698	0.166	0.46267	0.370346
			71.538	0.118	0.722512	0.236136				88.298	0.149	0.891783	0.298171					25.476	0.055	0.500655	0.0279439				7.924	54.239	0.155723	27.5572					43.76	0.14	0.7055	0.31234				6.778	91.057	0.109275	203.148
			31.748	0.117	0.320645	0.234135				23.908	50.442	0.241464	100.942					38.22	0.069	0.7511	0.0350569				14.441	59.216	0.283795	30.0859					28.589	0.101	0.460913	0.225331				31.856	0.214	0.513584	0.477433
			68.101	0.112	0.6878	0.224129				27.53	60.769	0.278045	121.608					33.905	0.068	0.666302	0.0345488				7.941	35.155	0.156057	17.8612					35.093	0.133	0.565771	0.296723				5.441	64.566	0.08772	144.047
			49.135	0.087	0.496249	0.1741				25.203	53.024	0.254543	106.109					3.008	0.269	0.0591133	0.136671				8.603	44.542	0.169066	22.6305					41.908	0.118	0.675642	0.263258				12.961	0.121	0.208958	0.269951
			23.56	0.084	0.237949	0.168097				24.399	51.247	0.246423	102.553					39.749	0.087	0.781148	0.0442021				6.807	40.815	0.133771	20.7369					38.457	0.139	0.620005	0.310109				26.78	1.256	0.431748	2.80213
			109.206	0.111	1.10295	0.222128				23.062	0.124	0.232919	0.248143					33.738	0.06	0.66302	0.0304842				8.301	43.182	0.163131	21.9395					21.439	0.101	0.34564	0.225331				8.441	26.237	0.136086	58.5347
			78.519	0.128	0.793018	0.256147				22.753	0.051	0.229799	0.102059					39.134	15.652	0.769062	7.95232				5.537	40.147	0.108813	20.3975					48.542	0.125	0.782596	0.278875				22.756	3.062	0.366873	6.83131
			88.289	0.141	0.891693	0.282162				21.256	45.399	0.214679	90.8502					31.686	0.073	0.622694	0.0370891				7.332	41.059	0.144089	20.8609					34.674	0.139	0.559015	0.310109				33.927	0.538	0.546972	1.20028
			51.773	0.12	0.522892	0.240138				26.451	61.526	0.267147	123.123					49.13	0.061	0.965504	0.0309923				8.381	36.137	0.164704	18.3601					27.992	0.176	0.451288	0.392656				25.545	0.87	0.411837	1.94097
			77.344	0.138	0.781151	0.276159				15.923	31.798	0.160818	63.6326					32.077	0.084	0.630378	0.0426779				9.408	40.566	0.184886	20.6104					36.955	0.127	0.59579	0.283337				33.915	0.099	0.546779	0.220869
			31.856	0.125	0.321736	0.250144				32.176	73.037	0.324968	146.158					39.801	0.066	0.78217	0.0335326				7.966	34.318	0.156548	17.436					34.567	0.119	0.55729	0.265489				10.375	155.388	0.167266	346.67
			47.254	0.129	0.477251	0.258148				20.432	40.827	0.206357	81.7009					44.746	0.048	0.879349	0.0243874				7.679	31.186	0.150908	15.8447					27.521	0.127	0.443695	0.283337				12.994	190.245	0.20949	424.436
			99.239	0.12	1.00228	0.240138				39.21	0.095	0.396009	0.190109					38.939	0.092	0.76523	0.0467425				5.905	29.809	0.116045	15.1451					47.942	0.207	0.772923	0.461816				23.143	0.237	0.373112	0.528746
			67.098	0.159	0.67767	0.318183				25.001	52.217	0.252503	104.494					42.287	0.094	0.831025	0.0477586				7.762	40.818	0.152539	20.7384					26.952	0.167	0.434521	0.372577				5.562	67.631	0.0896708	150.885
			85.164	0.125	0.860131	0.250144				23.404	0.09	0.236373	0.180103					8.731	0.071	0.171582	0.036073				10.852	45.479	0.213264	23.1065					36.852	0.123	0.594129	0.274413				12.325	188.593	0.198704	420.75
			45.761	0.12	0.462172	0.240138				51.039	0.104	0.515479	0.20812					51.209	0.038	1.00636	0.0193067				11.203	52.65	0.220162	26.7499					33.499	0.143	0.540072	0.319033				5.667	75.617	0.0913636	168.701
			43.876	0.119	0.443135	0.238137				25.817	54.915	0.260744	109.893					57.782	0.063	1.13553	0.0320084				9.727	53.425	0.191155	27.1437					23.861	0.112	0.384688	0.249872				34.085	0.468	0.54952	1.04411
			106.881	0.127	1.07947	0.254146				20.632	42.299	0.208377	84.6466					13.898	0.072	0.273124	0.0365811				12.015	68.541	0.236119	34.8237					41.006	0.11	0.6611	0.24541				31.253	0.562	0.503862	1.25382
			84.799	0.126	0.856445	0.252145				29.418	62.304	0.297113	124.68					30.619	0.063	0.601725	0.0320084				7.03	37.005	0.138154	18.8011					33.902	0.156	0.546569	0.348036				6.899	93.622	0.111226	208.87
			100.788	0.1	1.01793	0.200115				12.522	0.064	0.126468	0.128074					36.129	0.064	0.710008	0.0325165				12.085	50.28	0.237495	25.5458					31.153	0.399	0.50225	0.890168				29.013	0.116	0.467749	0.258796
			71.209	0.114	0.71919	0.228131				20.182	35.901	0.203832	71.8433					25.777	9.845	0.50657	5.00195				8.23	38.664	0.161736	19.644					44.206	0.163	0.712691	0.363653				9.339	135.739	0.150564	302.833
			105.102	0.107	1.0615	0.214123				15.633	29.104	0.157889	58.2415					47.431	0.049	0.932115	0.0248954				8.749	36.948	0.171936	18.7722					42.027	0.123	0.677561	0.274413				7.32	106.635	0.118013	237.902
			98.075	0.15	0.990528	0.300172				31.508	19.637	0.318221	39.2966					11.097	0.49	0.218079	0.248954				12.191	49.552	0.239578	25.1759					42.655	0.136	0.687685	0.303416				28.327	0.115	0.456689	0.256565
			80.632	0.117	0.814359	0.234135				32.352	0.098	0.326746	0.196113					29.539	0.036	0.580501	0.0182905				12.536	38.406	0.246358	19.513					30.262	0.135	0.487885	0.301185				9.86	117.969	0.158963	263.189
			93.981	0.1	0.94918	0.200115				17.957	36.538	0.18136	73.118					45.217	0.052	0.888606	0.0264197				8.878	44.545	0.174471	22.632					36.352	0.166	0.586068	0.370346				10.417	160.344	0.167943	357.727
			107.423	0.107	1.08494	0.214123				21.973	42.036	0.221921	84.1203					43.845	0.05	0.861643	0.0254035				17.044	82.539	0.334949	41.9356					36.349	0.148	0.58602	0.330188				9.876	130.084	0.159221	290.217
			59.688	0.133	0.602831	0.266153				19.718	39.44	0.199146	78.9253					32.425	0.042	0.637217	0.021339				8.11	40.874	0.159378	20.7669					18.34	0.115	0.295678	0.256565				5.77	83.729	0.0930241	186.799
			128.324	0.107	1.29603	0.214123				27.407	63.131	0.276803	126.335					39.515	0.087	0.77655	0.0442021				9.577	64.093	0.188207	32.5638					34.647	0.108	0.55858	0.240948				21.356	0.062	0.344302	0.138322
			51.669	0.079	0.521841	0.158091				31.194	17.435	0.31505	34.89					42.611	0.08	0.837392	0.0406456				7.517	36.231	0.147724	18.4079					33.982	0.115	0.547859	0.256565				23.642	0.048	0.381157	0.107088
			104.058	0.114	1.05095	0.228131				30.306	22.085	0.306082	44.1954					39.577	0.054	0.777768	0.0274358				9.826	61.397	0.193101	31.194					33.723	0.142	0.543683	0.316802				6.321	93.27	0.101907	208.085
			78.43	0.101	0.79212	0.202116				33.913	74.894	0.342511	149.874					50.395	0.054	0.990364	0.0274358				5.066	28.544	0.0995572	14.5024					39.966	0.116	0.644333	0.258796				43.273	0.361	0.697649	0.80539
			94.654	0.119	0.955977	0.238137				22.61	40.519	0.228354	81.0846					35.367	0.054	0.695033	0.0274358				8.307	44.372	0.163249	22.5441					27.096	0.126	0.436843	0.281106				9.118	136.587	0.147001	304.725
			49.476	0.158	0.499693	0.316182				45.45	0.066	0.459031	0.132076					41.891	0.044	0.823243	0.0223551				13.115	63.232	0.257736	32.1263					39.363	0.129	0.634612	0.287799				6.063	87.638	0.0977479	195.52
			107.997	0.143	1.09074	0.286164				33.783	0.1	0.341198	0.200115					41.092	0.063	0.807541	0.0320084				11.899	63.284	0.233839	32.1527					50.222	0.207	0.809681	0.461816				21.428	0.918	0.345463	2.04806
			104.662	0.127	1.05705	0.254146				25.205	53.679	0.254563	107.42					42.828	0.075	0.841657	0.0381053				9.042	68.532	0.177694	34.8191					43.722	0.145	0.704888	0.323495				6.298	91.46	0.101537	204.047
			96.02	0.117	0.969773	0.234135				19.513	41.127	0.197075	82.3013					43.066	0.146	0.846334	0.0741783				9.325	50.887	0.183255	25.8542					35.181	0.174	0.567189	0.388194				16.629	0.044	0.268093	0.0981639
			72.99	0.104	0.737177	0.20812				33.334	68.461	0.336663	137.001					49.918	0.067	0.98099	0.0340407				11.388	56.001	0.223797	28.4524					29.446	0.114	0.474729	0.254334				6.03	49.189	0.0972159	109.741
			79.945	0.101	0.807421	0.202116				32.279	69.37	0.326008	138.82					35.744	0.056	0.702442	0.0284519				5.739	28.94	0.112783	14.7036					22.717	0.133	0.366244	0.296723				4.29	46.868	0.0691635	104.562
			130.561	0.118	1.31863	0.236136				29.641	0.068	0.299365	0.136078					47.715	0.066	0.937696	0.0335326				10.708	52.072	0.210434	26.4562					43.074	0.143	0.694441	0.319033				4.402	61.807	0.0709692	137.891
			49.264	0.122	0.497552	0.24414				18.323	37.92	0.185057	75.8836					45.224	0.082	0.888743	0.0416618				7.154	42.376	0.140591	21.53					39.764	0.138	0.641077	0.307878				4.835	47.038	0.07795	104.942
			81.974	0.134	0.827913	0.268154				58.174	0.072	0.58754	0.144083					39.563	0.064	0.777493	0.0325165				11.018	64.316	0.216526	32.6771					33.929	0.957	0.547005	2.13506				5.982	106.51	0.096442	237.624
			86.513	0.113	0.873755	0.22613				31.437	67.073	0.317504	134.223					39.7	0.104	0.780185	0.0528393				7.934	41.437	0.155919	21.0529					37.465	0.145	0.604012	0.323495				4.085	44.572	0.0658585	99.44
			73.048	0.13	0.737763	0.260149				38.094	85.806	0.384738	171.711					47.62	0.054	0.935829	0.0274358				9.597	64.153	0.1886	32.5942					38.414	0.123	0.619312	0.274413				5.444	72.159	0.0877684	160.987
			71.728	0.127	0.724431	0.254146				40.787	83.84	0.411937	167.776					32.417	0.07	0.63706	0.0355649				7.756	46.112	0.152421	23.4281					34.849	0.195	0.561837	0.435044				4.386	62.229	0.0707112	138.833
			71.548	0.13	0.722613	0.260149				25.831	55.447	0.260885	110.958					55.831	0.056	1.09719	0.0284519				10.392	60.716	0.204224	30.848					21.072	0.098	0.339724	0.218638				5.736	85.801	0.092476	191.422
			96.462	0.1	0.974237	0.200115				31.582	69.121	0.318969	138.321					4.059	0.236	0.0797676	0.119905				9.868	59.24	0.193926	30.0981					37.635	0.138	0.606753	0.307878				4.251	51.975	0.0685348	115.956
			65.084	0.118	0.657329	0.236136				53.075	0.044	0.536042	0.0880506					4.176	0.227	0.0820669	0.115332				10.055	74.359	0.197601	37.7796					42.763	0.148	0.689427	0.330188				4.228	39.592	0.068164	88.3296
			48.409	0.144	0.488916	0.288166				17.564	35.194	0.177391	70.4285					15.391	27.624	0.302464	14.0349				11.274	65.101	0.221557	33.0759					35.762	0.156	0.576556	0.348036				4.706	73.619	0.0758703	164.244
			83.348	0.146	0.84179	0.292168				16.651	33.125	0.16817	66.2881					14.976	28.119	0.294309	14.2864				9.608	68.779	0.188817	34.9446					33.168	0.089	0.534736	0.198559				4.734	66.699	0.0763217	148.805
			77.163	0.119	0.779323	0.238137				15.016	29.402	0.151657	58.8378					4.065	0.296	0.0798855	0.150389				9.332	49.122	0.183393	24.9574					36.416	0.2	0.5871	0.446199				4.377	60.96	0.0705661	136.002
			110.86	0.11	1.11965	0.220126				31.389	0.07	0.31702	0.14008					4.343	0.3	0.0853487	0.152421				9.865	58.637	0.193867	29.7917					28.817	0.294	0.464589	0.655913				3.374	68.376	0.0543957	152.547
			97.791	0.114	0.98766	0.228131				3.291	0.079	0.0332381	0.158091					4.418	0.296	0.0868226	0.150389				4.88	72.099	0.0959019	36.6314					41.344	0.112	0.666549	0.249872				4.067	41.859	0.0655683	93.3873
			47.216	0.084	0.476868	0.168097				24.772	54.941	0.25019	109.945					17.388	47.715	0.341709	24.2426				1.052	0.214	0.0206739	0.108727					35.112	0.152	0.566077	0.339112				7.296	115.74	0.117626	258.216
			101.833	0.118	1.02848	0.236136				22.254	47.175	0.224759	94.4042					22.142	50.869	0.435135	25.845				3.734	47.805	0.0733807	24.2883					31.902	0.108	0.514325	0.240948				4.723	78.815	0.0761444	175.836
			105.342	0.104	1.06392	0.20812				31.333	0.051	0.316454	0.102059					4.605	0.328	0.0904976	0.166647				15.332	91.415	0.301305	46.4453					21.472	0.099	0.346172	0.220869				2.036	34.121	0.0328245	76.1239
			153.845	0.117	1.55379	0.234135				32.418	67.085	0.327412	134.247					3.923	0.307	0.0770949	0.155978				9.782	73.074	0.192236	37.1267					25.205	0.266	0.406356	0.593445				2.461	32.304	0.0396763	72.0701
			136.262	0.116	1.37621	0.232133				19.564	39.405	0.197591	78.8553					19.064	43.465	0.374646	22.0833				7.412	45.803	0.145661	23.2711					35.233	0.159	0.568028	0.354729				3.637	43.222	0.0586358	96.4282
			126.287	0.091	1.27546	0.182105				24.757	0.348	0.250038	0.6964					22.27	37.772	0.437651	19.1908				8.659	63.7	0.170167	32.3641					34.307	0.222	0.553099	0.495281				2.86	42.612	0.046109	95.0673
			148.454	0.104	1.49934	0.20812				24.976	0.093	0.25225	0.186107					18.624	32.12	0.365999	16.3192				3.21	36.332	0.063083	18.4592					45.468	0.182	0.733037	0.406042				4.077	46.148	0.0657295	102.956
			121.36	0.101	1.2257	0.202116				22.717	46.268	0.229435	92.5892					19.556	51.963	0.384315	26.4009				6.505	69.869	0.127836	35.4984					25.164	0.147	0.405695	0.327957				5.707	85.465	0.0920085	190.672
			128.128	0.097	1.29405	0.194112				23.684	47.961	0.239201	95.9771					18.819	33.139	0.369831	16.8369				13.916	105.096	0.273478	53.3962					36.973	0.159	0.59608	0.354729				3.781	62.034	0.0609574	138.398
			180.478	0.113	1.82277	0.22613				31.444	66.2	0.317575	132.476					13.811	37.966	0.271414	19.2894				2.839	32.405	0.0557921	16.464					36.686	0.182	0.591453	0.406042				2.36	29.708	0.038048	66.2785
			161.587	0.123	1.63198	0.246141				29.536	63.893	0.298305	127.859					13.957	40.714	0.274283	20.6856				9.523	94.712	0.187146	48.1204					33.453	0.101	0.53933	0.225331				3.503	43.964	0.0564755	98.0836
			171.747	0.112	1.73459	0.224129				30.778	67.731	0.310849	135.54					17.975	25.842	0.353245	13.1296				10.84	88.349	0.213028	44.8875					32.483	0.195	0.523692	0.435044				3.689	59	0.0594742	131.629
			109.754	0.117	1.10848	0.234135				2.22	0.08	0.0224213	0.160092					17.629	36.488	0.346446	18.5385				11.387	78.388	0.223778	39.8266					24.446	0.19	0.394119	0.423889				6.784	89.352	0.109372	199.344
			115.762	0.142	1.16916	0.284163				32.469	70.615	0.327927	141.311					22.27	29.105	0.437651	14.7874				6.023	51.92	0.118364	26.379					28.566	21.533	0.460542	48.0401				4.088	74.497	0.0659069	166.203
			181.414	0.123	1.83223	0.246141				22.179	42.479	0.224001	85.0068					18.253	24.345	0.358708	12.369				3.577	28.913	0.0702953	14.6898					35.624	0.077	0.574331	0.171787				6.192	81.734	0.0998276	182.348
			173.743	0.178	1.75475	0.356205				49.135	102.725	0.496249	205.568					18.561	25.921	0.364761	13.1697				8.473	58.715	0.166512	29.8314					41.071	0.119	0.662148	0.265489				4.348	50.527	0.0700986	112.726
			111.62	0.128	1.12733	0.256147				29.351	60.652	0.296436	121.374					15.944	30.701	0.313332	15.5983				12.611	106.201	0.247832	53.9576					36.867	0.295	0.594371	0.658144				3.33	40.571	0.0536864	90.5138
			172.517	0.109	1.74237	0.218125				26.247	51.516	0.265087	103.091					54.152	0.11	1.0642	0.0558877				16.996	138.964	0.334006	70.6035					11.583	25.721	0.186742	57.3835				3.544	64.111	0.0571365	143.031
			129.097	0.123	1.30384	0.246141				49.115	0.054	0.496047	0.108062					54.823	0.095	1.07738	0.0482667				25.02	0.045	0.491694	0.0228632					28.481	0.907	0.459172	2.02351				3.768	68.258	0.0607478	152.283
			109.21	0.099	1.10299	0.198114				25.541	52.344	0.257956	104.748					61.76	0.101	1.21371	0.0513151				4.849	79.278	0.0952927	40.2788					31.202	0.1	0.50304	0.2231				5.38	72.522	0.0867365	161.796
			166.235	0.123	1.67892	0.246141				31.827	65.893	0.321443	131.862					53.719	0.116	1.05569	0.0589362				6.215	60.677	0.122137	30.8282					41.932	0.125	0.676029	0.278875				4.504	58.931	0.0726136	131.475
			143.015	0.111	1.44441	0.222128				28.371	58.519	0.286539	117.105					58.564	0.11	1.1509	0.0558877				4.016	38.078	0.0789225	19.3463					20.779	0.115	0.335	0.256565				3.572	53.352	0.0575879	119.028
			125.876	0.135	1.27131	0.270155				2.322	0.069	0.0234515	0.138079					49.017	0.081	0.963283	0.0411537				5.488	73.799	0.10785	37.4951					37.586	0.124	0.605963	0.276644				4.884	78.553	0.07874	175.252
			115.499	0.106	1.16651	0.212122				28.514	58.086	0.287983	116.239					60.614	0.108	1.19119	0.0548716				5.591	72.868	0.109874	37.0221					58.012	0.093	0.935272	0.207483				3.737	54.121	0.060248	120.744
			158.623	0.124	1.60204	0.248143				51.525	0.066	0.520387	0.132076					70.71	0.098	1.38959	0.0497909				15.138	0.062	0.297492	0.0315004					48.042	0.155	0.774535	0.345805				5.472	84.424	0.0882198	188.35
			153.793	0.115	1.55326	0.230132				27.521	52.377	0.277954	104.814					64.376	0.116	1.26512	0.0589362				27.728	0.043	0.544911	0.021847					39.008	0.111	0.628888	0.247641				5.019	56.232	0.0809165	125.453
			167.552	0.125	1.69223	0.250144				29.428	60.194	0.297214	120.457					61.757	0.119	1.21365	0.0604604				5.2	64.058	0.102191	32.546					55.698	0.102	0.897965	0.227562				4.478	59.657	0.0721945	133.095
			135.454	0.108	1.36804	0.216124				36.335	77.481	0.366973	155.051					63.121	0.115	1.24046	0.0584281				5.354	73.258	0.105217	37.2202					52.4	0.101	0.844795	0.225331				3.299	46.708	0.0531866	104.205
			177.207	0.112	1.78974	0.224129				3.537	0.413	0.0357226	0.826475					69.427	0.109	1.36438	0.0553797				35.376	0.599	0.69521	0.304334					68.812	0.247	1.10939	0.551056				3.294	51.341	0.053106	114.542
			163.507	0.116	1.65137	0.232133				24.117	51.554	0.243575	103.167					43.896	0.086	0.862645	0.0436941				25.976	0.038	0.510481	0.0193067					48.145	0.2	0.776195	0.446199				7.113	82.644	0.114676	184.379
			148.33	0.109	1.49809	0.218125				21.709	0.538	0.219254	1.07662					70.041	0.116	1.37645	0.0589362				10.102	177.684	0.198525	90.276					63.334	0.162	1.02107	0.361422				5.641	75.253	0.0909444	167.889
			166.973	0.11	1.68638	0.220126				17.486	39.639	0.176603	79.3236					52.833	0.135	1.03828	0.0685895				25.833	0.044	0.507671	0.0223551					73.225	1.76	1.18054	3.92656				6.371	92.889	0.102713	207.235
			105.869	0.123	1.06925	0.246141				19.307	0.129	0.194995	0.258148					42.218	0.088	0.829669	0.0447102				8.913	59.487	0.175158	30.2236					65.227	0.133	1.05159	0.296723				3.599	53.142	0.0580232	118.56
			185.303	0.129	1.87151	0.258148				59.406	0.061	0.599983	0.12207					52.419	0.079	1.03014	0.0401376				7.894	54.446	0.155133	27.6624					75.083	0.186	1.21049	0.414965				3.916	58.495	0.0631339	130.502
			139.938	0.117	1.41333	0.234135				19.46	40.503	0.19654	81.0526					73.285	0.12	1.4402	0.0609684				5.959	74.286	0.117106	37.7425					58.314	0.389	0.94014	0.867858				5.971	65.858	0.0962647	146.929
			166.173	0.122	1.6783	0.24414				43.852	0.062	0.442892	0.124071					57.509	0.121	1.13017	0.0614765				22.884	0.076	0.449717	0.0386133					61.055	0.196	0.984331	0.437275				5.696	84.103	0.0918311	187.634
			154.131	0.126	1.55668	0.252145				19.792	40.354	0.199893	80.7544					67.147	0.096	1.31957	0.0487748				16.229	0.053	0.318933	0.0269277					60.127	0.21	0.96937	0.468509				3.312	56.142	0.0533962	125.253
			138.817	0.097	1.40201	0.194112				46.927	0.054	0.473949	0.108062					70.07	0.112	1.37702	0.0569039				6.003	75.177	0.117971	38.1952					73.983	0.178	1.19276	0.397118				3.198	42.193	0.0515583	94.1325
			150.788	0.118	1.52291	0.236136				40.642	0.075	0.410472	0.150086					51.899	0.109	1.01992	0.0553797				4.864	58.515	0.0955874	29.7297					65.333	0.203	1.0533	0.452892				3.434	33.464	0.0553631	74.6581
			172.402	0.143	1.74121	0.286164				33.579	0.059	0.339138	0.118068					57.706	0.096	1.13404	0.0487748				2.26	6.367	0.0444136	3.23488					69.477	0.163	1.12011	0.363653				4.144	52.461	0.0668097	117.04
			161.321	0.123	1.62929	0.246141				35.112	73.49	0.354621	147.064					62.566	0.124	1.22955	0.0630007				25.632	0.324	0.503721	0.164615					63.472	0.186	1.0233	0.414965				5.328	92.515	0.0858982	206.401
			130.764	0.116	1.32068	0.232133				29.584	0.079	0.29879	0.158091					66.074	0.157	1.29849	0.0797671				8.19	0.324	0.16095	0.164615					55.642	0.176	0.897062	0.392656				3.793	40.79	0.0611509	91.0024
			182.44	0.122	1.84259	0.24414				31.218	0.045	0.315292	0.0900517					79.389	0.109	1.56015	0.0553797				19.233	0.313	0.377967	0.159026					55.833	0.302	0.900142	0.673761				3.998	64.823	0.0644559	144.62
			144.067	0.126	1.45503	0.252145				28.049	0.062	0.283287	0.124071					42.723	0.125	0.839593	0.0635088				23.562	0.994	0.463041	0.505022					72.729	0.187	1.17254	0.417196				4.982	53.477	0.08032	119.307
			152.594	0.111	1.54115	0.222128				19.582	0.067	0.197772	0.134077					40.853	0.101	0.802844	0.0513151				4.436	0.235	0.0871764	0.119397					79.503	0.172	1.28175	0.383732				4.236	53.667	0.0682929	119.731
			125.274	0.114	1.26523	0.228131				31.493	68.936	0.31807	137.951					53.753	0.1	1.05636	0.050807				13.555	1.597	0.266383	0.811388					64.214	0.172	1.03526	0.383732				4.686	57.414	0.0755479	128.09
			119.039	0.089	1.20226	0.178102				20.939	40.959	0.211478	81.9651					60.323	0.138	1.18547	0.0701137				13.623	0.064	0.26772	0.0325165					69.372	0.219	1.11842	0.488588				4.641	70.202	0.0748224	156.62
			166.282	0.132	1.6794	0.264152				24.368	50.862	0.24611	101.782					76.119	0.123	1.49589	0.0624927				21.103	0.126	0.414717	0.0640169					62.367	0.15	1.00548	0.33465				6.384	75.713	0.102923	168.915
			170.435	0.141	1.72134	0.282162				26.589	56.757	0.268541	113.579					45.393	0.127	0.892064	0.0645249				19.133	0.056	0.376002	0.0284519					39.378	0.159	0.634854	0.354729				4.637	62.539	0.0747579	139.524
			136.76	0.111	1.38124	0.222128				22.003	42.886	0.222224	85.8213					64.908	0.081	1.27557	0.0411537				19.683	0.056	0.386811	0.0284519					47.786	0.19	0.770408	0.423889				5.565	57.24	0.0897191	127.702
			163.013	0.112	1.64638	0.224129				22.394	0.046	0.226173	0.0920529					47.855	0.104	0.940448	0.0528393				21.354	0.053	0.419649	0.0269277					60.088	0.152	0.968741	0.339112				3.644	46.442	0.0587487	103.612
			152.081	0.133	1.53597	0.266153				30.079	0.084	0.303789	0.168097					65.443	0.136	1.28609	0.0690976				9.504	0.175	0.186773	0.0889123					72.944	0.208	1.17601	0.464047				6.765	81.059	0.109066	180.842
			161.357	0.106	1.62966	0.212122				39.197	0.058	0.395878	0.116067					40.654	0.105	0.798933	0.0533474				12.206	0.181	0.239873	0.0919607					62.921	0.224	1.01441	0.499743				3.926	47.663	0.0632951	106.336
			145.005	0.123	1.46451	0.246141				47.287	0.112	0.477585	0.224129					50.851	0.104	0.999325	0.0528393				11.577	0.076	0.227511	0.0386133					83.996	0.188	1.35419	0.419427				5.483	63.273	0.0883971	141.162
			189.392	0.135	1.9128	0.270155				44.748	0.06	0.451941	0.120069					49.034	0.161	0.963617	0.0817993				20.513	0.104	0.403122	0.0528393					53.46	0.137	0.861884	0.305647				3.565	57.206	0.0574751	127.626
			167.009	0.116	1.68674	0.232133				13.672	18.731	0.138083	37.4835					63.406	0.109	1.24606	0.0553797				2.759	28.473	0.0542199	14.4663					30.297	0.273	0.488449	0.609062				5.036	58.269	0.0811906	129.998
			120.428	0.266	1.21629	0.532306				42.104	0.067	0.425238	0.134077					50.379	0.152	0.990049	0.0772267				6.785	0.239	0.133339	0.121429					48.624	0.164	0.783918	0.365884				4.946	77.373	0.0797396	172.619
			146.772	0.114	1.48235	0.228131				16.105	28.716	0.162656	57.465					56.33	0.103	1.107	0.0523312				17.486	0.145	0.343635	0.0736702					59.05	0.283	0.952006	0.631372				4.559	61.625	0.0735004	137.485
			144.559	0.106	1.46	0.212122				19.091	37.699	0.192813	75.4413					51.036	0.12	1.00296	0.0609684				13.325	0.126	0.261863	0.0640169					53.857	0.209	0.868284	0.466278				3.836	48.309	0.0618441	107.777
			190.057	0.143	1.91952	0.286164				29.434	48.185	0.297275	96.4254					68.826	0.119	1.35257	0.0604604				11.163	0.157	0.219376	0.0797671					65.049	0.236	1.04872	0.526515				3.773	47.508	0.0608284	105.99
			139.138	0.115	1.40525	0.230132				24.311	0.051	0.245534	0.102059					64.942	0.463	1.27624	0.235237				11.636	0.176	0.228671	0.0894204					36.588	0.286	0.589873	0.638065				3.501	51.35	0.0564432	114.562
			133.207	0.139	1.34535	0.27816				44.215	0.058	0.446558	0.116067					66.207	0.11	1.3011	0.0558877				7.241	0.154	0.1423	0.0782428					65.047	0.301	1.04869	0.67153				4.901	59.974	0.0790141	133.802
			146.252	0.139	1.4771	0.27816				6.475	0.59	0.0653956	1.18068					63.841	0.097	1.2546	0.0492828				24.744	0.25	0.48627	0.127018					86.372	0.205	1.39249	0.457354				4.629	61.238	0.0746289	136.622
			122.472	0.117	1.23693	0.234135				7.351	0.059	0.0742429	0.118068					50.73	0.099	0.996947	0.050299				16.275	0.194	0.319837	0.0985657					92.11	0.153	1.485	0.341343				4.483	69.765	0.0722751	155.646
			148.3	0.122	1.49779	0.24414				30.605	0.066	0.309101	0.132076					58.22	0.118	1.14414	0.0599523				10.541	0.447	0.207152	0.227107					56.705	0.178	0.9142	0.397118				4.254	63.22	0.0685831	141.044
			142.866	0.144	1.4429	0.288166				22.237	39.852	0.224587	79.7498					75.301	0.154	1.47982	0.0782428				8.732	0.379	0.171601	0.192559					69.177	0.182	1.11527	0.406042				3.573	56.05	0.057604	125.047
			136.803	0.104	1.38167	0.20812				22.104	45.221	0.223244	90.494					69.522	0.176	1.36625	0.0894204				3.502	50.848	0.0688214	25.8344					64.24	0.223	1.03568	0.497512				5.288	83.78	0.0852533	186.913
			150.93	0.137	1.52435	0.274158				22.285	0.05	0.225072	0.100057					52.378	0.081	1.02933	0.0411537				11.852	1.052	0.232916	0.53449					78.043	0.172	1.25821	0.383732				5.733	68.616	0.0924276	153.082
			145.53	0.11	1.46981	0.220126				31.409	0.119	0.317222	0.238137					57.423	0.11	1.12848	0.0558877				3.863	57.056	0.0759158	28.9885					56.715	0.219	0.914361	0.488588				3.459	37.499	0.0557661	83.6602
			138.611	0.138	1.39993	0.276159				37.878	0.041	0.382556	0.0820471					37.399	0.147	0.734966	0.0746863				25.218	0.288	0.495585	0.146324					62.784	0.199	1.01221	0.443968				5.235	66.664	0.0843989	148.727
			158.162	0.161	1.59739	0.322185				39.816	0.054	0.40213	0.108062					60.255	0.128	1.18413	0.065033				3.023	25.424	0.0594081	12.9172					45.204	0.17	0.72878	0.37927				4.128	66.761	0.0665518	148.944
			143.541	0.11	1.44972	0.220126				23.427	46.943	0.236606	93.94					69.209	0.323	1.3601	0.164107				11.752	0.842	0.230951	0.427795					69.256	0.3	1.11655	0.669299				4.544	64.988	0.0732585	144.988
			103.152	0.093	1.0418	0.186107				18.961	28.681	0.1915	57.395					62.237	0.134	1.22308	0.0680814				0.774	0.367	0.0152107	0.186462					69.32	0.212	1.11758	0.472971				2.998	47.986	0.0483339	107.057
			153.556	0.12	1.55087	0.240138				21.644	44.456	0.218598	88.9631					41.293	0.102	0.811491	0.0518232				4.458	71.344	0.0876087	36.2478					64.352	0.304	1.03749	0.678223				3.351	49.147	0.0540249	109.647
			144.188	0.141	1.45626	0.282162				20.714	0.043	0.209205	0.0860494					63.616	0.114	1.25018	0.05792				4.085	38.941	0.0802785	19.7848					91.573	0.132	1.47634	0.294492				5.671	108.899	0.0914281	242.953
			132.807	0.135	1.34131	0.270155				24.707	0.064	0.249533	0.128074					51.837	0.099	1.0187	0.050299				9.76	0.42	0.191804	0.21339					72.453	0.15	1.16809	0.33465				6.155	90.97	0.0992311	202.954
			120.558	0.132	1.2176	0.264152				33.29	0.057	0.336219	0.114066					47.736	0.075	0.938109	0.0381053				2.561	39.144	0.0503288	19.8879					94.456	0.204	1.52282	0.455123				3.851	48.944	0.062086	109.194
			141.033	0.184	1.42439	0.368212				18.781	29.528	0.189682	59.09					51.582	0.092	1.01369	0.0467425				5.475	74.971	0.107595	38.0905					78.044	0.199	1.25823	0.443968				6.63	95.519	0.106889	213.103
			103.654	0.078	1.04687	0.15609				41.222	0.074	0.41633	0.148085					43.748	0.096	0.859737	0.0487748				2.591	18.067	0.0509184	9.17931					82.972	0.173	1.33768	0.385963				4.247	67.923	0.0684703	151.536
			17.174	0.554	0.173452	1.10864				26.145	51.305	0.264057	102.669					60.078	0.153	1.18065	0.0777348				3.391	51.848	0.06664	26.3424					70.461	0.188	1.13597	0.419427				4.124	56.838	0.0664873	126.805
			161.284	0.119	1.62892	0.238137				32.499	67.805	0.32823	135.688					53.344	0.094	1.04832	0.0477586				2.181	34.806	0.0428611	17.6839					89.653	0.253	1.44539	0.564442				4.485	59.389	0.0723073	132.497
			139.393	0.153	1.40783	0.306176				19.505	38.178	0.196995	76.3999					68.879	0.202	1.35361	0.10263				3.712	63.924	0.0729483	32.4779					83.497	0.375	1.34614	0.836624				4.429	62.53	0.0714045	139.504
			17.749	0.594	0.17926	1.18868				28.768	0.045	0.290548	0.0900517					69.838	0.137	1.37246	0.0696056				3.253	48.113	0.063928	24.4448					59.663	0.156	0.961889	0.348036				3.577	52.428	0.0576685	116.967
			139.928	0.113	1.41323	0.22613				42.296	0.076	0.427177	0.152087					54.413	0.083	1.06933	0.0421698				3.933	63.52	0.0772914	32.2726					68.044	0.147	1.09701	0.327957				4.993	62.552	0.0804973	139.553
			128.43	0.134	1.2971	0.268154				21.808	44.187	0.220254	88.4248					67.177	0.148	1.32016	0.0751944				3.748	43.66	0.0736558	22.1824					53.124	0.212	0.856467	0.472971				4.187	40.258	0.067503	89.8155
			170.363	0.141	1.72062	0.282162				32.2	64.553	0.32521	129.18					53.639	0.104	1.05411	0.0528393				2.87	43.444	0.0564013	22.0726					63.308	0.163	1.02065	0.363653				4.452	60.644	0.0717753	135.297
			144.538	0.159	1.45979	0.318183				19.741	38.867	0.199378	77.7787					62.839	0.102	1.23491	0.0518232				4.377	36.366	0.0860169	18.4765					68.72	0.193	1.10791	0.430582				3.148	43.919	0.0507522	97.9832
			126.739	0.139	1.28003	0.27816				43.436	0.09	0.438691	0.180103					46.873	0.111	0.921149	0.0563958				3.721	53.802	0.0731252	27.3352					85.602	0.212	1.38008	0.472971				8.486	99.063	0.136812	221.009
			125.767	0.134	1.27021	0.268154				18.818	0.073	0.190056	0.146084					57.838	0.117	1.13663	0.0594442				4.586	72.88	0.0901242	37.0282					86.384	0.349	1.39269	0.778618				5.268	63.454	0.0849309	141.566
			15.492	0.543	0.156465	1.08662				43.905	0.045	0.443427	0.0900517					69.985	0.118	1.37535	0.0599523				3.949	57.312	0.0776058	29.1185					50.203	0.188	0.809375	0.419427				3.213	23.326	0.0518001	52.0402
			14.541	0.481	0.14686	0.962553				17.317	0.084	0.174897	0.168097					56.357	0.102	1.10753	0.0518232				11.619	9.218	0.228337	4.68339					63.135	0.139	1.01786	0.310109				7.991	151.521	0.128831	338.043
			131.361	0.149	1.32671	0.298171				47.128	0.08	0.475979	0.160092					65.133	0.117	1.28	0.0594442				4.478	70.364	0.0880018	35.7499					70.513	0.179	1.13681	0.399349				7.464	136.767	0.120335	305.127
			156.587	0.117	1.58148	0.234135				13.056	0.063	0.131862	0.126072					78.762	0.134	1.54783	0.0680814				2.981	44.295	0.0585827	22.505					64.229	0.188	1.0355	0.419427				7.715	135.185	0.124382	301.597
			98.595	0.21	0.99578	0.420241				34.156	0.049	0.344965	0.0980563					43.001	0.104	0.845057	0.0528393				4.975	79.361	0.0977688	40.321					60.324	0.249	0.972546	0.555518				3.255	42.26	0.0524772	94.2819
			138.393	0.162	1.39773	0.324186				44.439	103.347	0.448821	206.813					57.31	0.084	1.12626	0.0426779				2.041	23.563	0.0401098	11.9717					52.507	0.303	0.84652	0.675992				4.27	59.877	0.0688411	133.585
			108.442	0.106	1.09523	0.212122				39.45	0.058	0.398433	0.116067					41.28	0.087	0.811236	0.0442021				3.244	46.891	0.0637512	23.8239					67.15	0.241	1.08259	0.53767				2.791	44.983	0.0449966	100.357
			111.178	0.159	1.12286	0.318183				45.295	99.793	0.457466	199.701					59.555	0.165	1.17038	0.0838316				2.218	20.757	0.0435882	10.546					79.94	0.21	1.2888	0.468509				4.469	73.137	0.0720494	163.168
			148.823	0.094	1.50307	0.188108				22.207	35.882	0.224284	71.8053					68.445	0.119	1.34508	0.0604604				3.043	39.728	0.0598011	20.1846					59.321	0.235	0.956375	0.524284				26.135	0.102	0.421349	0.227562
			102.683	0.094	1.03707	0.188108				42.653	98.622	0.430783	197.357					47.368	0.118	0.930877	0.0599523				4.503	34.695	0.0884931	17.6275					80.507	0.143	1.29794	0.319033				20.073	0.023	0.323618	0.0513129
			118.365	0.146	1.19545	0.292168				40.704	0.06	0.411098	0.120069					71.102	0.124	1.3973	0.0630007				3.535	58.081	0.0694699	29.5092					52.546	0.303	0.847148	0.675992				2.534	38.321	0.0408532	85.494
			128.532	0.118	1.29813	0.236136				24.181	52.601	0.244221	105.262					66.088	0.11	1.29876	0.0558877				2.429	30.359	0.0477348	15.4245					82.123	0.195	1.32399	0.435044				3.359	44.051	0.0541539	98.2777
			94.033	0.116	0.949705	0.232133				39.839	91.206	0.402362	182.517					60.742	0.143	1.1937	0.0726541				9.728	1.457	0.191175	0.740259					67.32	0.204	1.08534	0.455123				15.578	0.032	0.251149	0.0713919
			88.889	0.143	0.897752	0.286164				31.144	69.721	0.314545	139.522					46.718	0.106	0.918103	0.0538555				3.23	45.823	0.063476	23.2813					62.641	0.244	1.0099	0.544363				15.981	0.024	0.257646	0.0535439
			99.51	0.275	1.00502	0.550316				27.167	0.092	0.274379	0.184106					58.32	0.1	1.14611	0.050807				25.266	1.131	0.496528	0.574628					76.249	0.257	1.22929	0.573366				17.243	0.209	0.277992	0.466278
			96.68	0.117	0.976439	0.234135				28.911	0.083	0.291992	0.166095					69.636	0.145	1.36849	0.0736702				4.46	66.512	0.087648	33.7928					57.542	0.189	0.927694	0.421658				3.697	69.829	0.0596032	155.788
			118.199	0.13	1.19377	0.260149				19.473	0.296	0.196671	0.59234					72.891	0.164	1.43246	0.0833235				18.84	1.505	0.370244	0.764646					78.055	0.216	1.25841	0.481895				22.316	0.105	0.359779	0.234255
			145.617	0.14	1.47069	0.280161				49.636	0.054	0.501309	0.108062					56.895	0.104	1.1181	0.0528393				3.378	41.356	0.0663845	21.0118					35.648	0.33	0.574718	0.736229				3.906	54.627	0.0629727	121.873
			116.099	0.127	1.17257	0.254146				31.606	0.06	0.319211	0.120069					69.599	0.144	1.36776	0.0731621				16.454	1.491	0.323354	0.757533					33.1	0.197	0.533639	0.439506				21.002	0.097	0.338595	0.216407
			112.952	0.109	1.14078	0.218125				70.291	0.052	0.709918	0.10406					57.99	0.149	1.13962	0.0757025				13.975	0.104	0.274637	0.0528393					72.106	0.146	1.1625	0.325726				30.455	0.042	0.490997	0.0937019
			129.299	0.143	1.30588	0.286164				31.08	70.429	0.313899	140.939					49.697	0.105	0.976647	0.0533474				7.445	0.485	0.146309	0.246414					67.632	0.226	1.09037	0.504205				4.843	96.278	0.078079	214.796
			122.783	0.117	1.24007	0.234135				37.57	81.499	0.379446	163.092					51.296	0.102	1.00807	0.0518232				12.584	0.659	0.247301	0.334818					74.198	0.176	1.19622	0.392656				16.666	0.21	0.26869	0.468509
			105.248	0.165	1.06297	0.33019				34.282	0.075	0.346238	0.150086					49.578	0.106	0.974308	0.0538555				20.226	0.053	0.397482	0.0269277					63.207	0.166	1.01903	0.370346				4.276	59.273	0.0689378	132.238
			121.06	0.138	1.22267	0.276159				30.345	0.052	0.306475	0.10406					47.463	0.204	0.932744	0.103646				2.69	34.095	0.0528639	17.3227					39.706	0.256	0.640142	0.571135				24.109	0.274	0.388686	0.611293
			151.213	0.124	1.52721	0.248143				28.76	0.052	0.290467	0.10406					55.68	0.122	1.09422	0.0619846				14.886	0.075	0.29254	0.0381053					65.567	0.198	1.05707	0.441737				3.996	64.817	0.0644237	144.607
			132.954	0.12	1.3428	0.240138				17.69	0.093	0.178664	0.186107					34.096	0.105	0.670055	0.0533474				3.114	52.409	0.0611964	26.6275					59.041	0.209	0.951861	0.466278				3.832	66.559	0.0617796	148.493
			127.163	0.107	1.28431	0.214123				37.418	0.057	0.377911	0.114066					58.836	0.104	1.15625	0.0528393				4.617	0.086	0.0907334	0.0436941					65.511	0.197	1.05617	0.439506				1.817	22.167	0.0292937	49.4545
			85.559	0.13	0.86412	0.260149				36.099	80.782	0.364589	161.657					61.623	0.134	1.21102	0.0680814				2.653	50.2	0.0521368	25.5051					62.685	0.152	1.01061	0.339112				9.047	172.894	0.145856	385.726
			131.168	0.123	1.32476	0.246141				26.265	0.046	0.265269	0.0920529					72.95	0.131	1.43362	0.0665572				19.827	0.1	0.389641	0.050807					82.929	0.146	1.33698	0.325726				4.247	54.187	0.0684703	120.891
			95.865	0.111	0.968208	0.222128				71.843	0.047	0.725593	0.094054					62.225	0.115	1.22285	0.0584281				2.554	37.569	0.0501913	19.0877					65.065	0.116	1.04898	0.258796				2.106	18.182	0.033953	40.564
			157.602	0.222	1.59173	0.444255				36.622	0.053	0.369871	0.106061					67.384	0.109	1.32423	0.0553797				15.793	0.175	0.310364	0.0889123					77.273	0.278	1.2458	0.620217				7.315	123.742	0.117933	276.068
			84.7	0.154	0.855445	0.308177				27.878	59.8	0.281559	119.669					60.324	0.095	1.18549	0.0482667				13.027	0.605	0.256007	0.307383					79.866	0.186	1.2876	0.414965				4.67	87.627	0.0752899	195.496
			90.682	0.08	0.915861	0.160092				20.414	44.446	0.206175	88.9431					83.024	0.151	1.63159	0.0767186				5.02	87.611	0.0986532	44.5126					43.894	0.299	0.707661	0.667068				3.659	54.601	0.0589905	121.815
			134.131	0.136	1.35468	0.272156				55.833	0.059	0.563897	0.118068					65.73	0.098	1.29173	0.0497909				2.98	49.312	0.058563	25.054					37.821	0.366	0.609751	0.816545				2.782	36.203	0.0448515	80.7688
			123.344	0.135	1.24574	0.270155				31.477	0.045	0.317908	0.0900517					73.399	0.11	1.44244	0.0558877				3.111	44.744	0.0611374	22.7331					52.73	0.204	0.850115	0.455123				2.337	27.759	0.0376772	61.9303
			70.861	0.112	0.715675	0.224129				26.231	0.073	0.264925	0.146084					57.857	0.138	1.13701	0.0701137				2.194	36.774	0.0431165	18.6838					74.92	0.224	1.20786	0.499743				3.966	63.758	0.06394	142.244
			117.557	0.117	1.18729	0.234135				18.276	38.759	0.184582	77.5626					76.658	0.119	1.50648	0.0604604				3.875	0.107	0.0761516	0.0543635					45.839	0.159	0.739018	0.354729				8.119	119.363	0.130895	266.299
			104.057	0.133	1.05094	0.266153				41.193	0.062	0.416037	0.124071					84.67	0.155	1.66394	0.0787509				17.836	0.199	0.350513	0.101106					55.875	0.257	0.900819	0.573366				4.926	73.822	0.0794171	164.697
			150.165	0.138	1.51662	0.276159				27.717	61.146	0.279933	122.362					63.167	0.137	1.24136	0.0696056				3.244	57.744	0.0637512	29.338					75.669	0.146	1.21994	0.325726				2.964	45.332	0.0477857	101.136
			108.009	0.196	1.09086	0.392225				24.482	55.705	0.247261	111.474					59.774	0.158	1.17468	0.0802751				22.675	0.132	0.44561	0.0670653					59.199	0.278	0.954408	0.620217				4.054	50.023	0.0653587	111.601
			131.139	0.134	1.32446	0.268154				27.293	0.051	0.275651	0.102059					75.973	0.118	1.49302	0.0599523				16.57	0.484	0.325634	0.245906					42.021	0.214	0.677464	0.477433				3.919	57.99	0.0631823	129.376
			164.913	0.136	1.66557	0.272156				34.552	0.062	0.348965	0.124071					62.378	0.092	1.22585	0.0467425				2.36	30.145	0.0463788	15.3158					89.132	0.186	1.43699	0.414965				9.906	30.007	0.159705	66.9455
			112.884	0.103	1.14009	0.206118				42.592	99.475	0.430166	199.064					56.064	0.096	1.10177	0.0487748				3.012	47.177	0.0591919	23.9692					71.392	0.133	1.15098	0.296723				5.552	90.39	0.0895095	201.66
			111.27	0.11	1.12379	0.220126				25.669	58.424	0.259249	116.915					72.184	0.099	1.41856	0.050299				4.009	63.258	0.078785	32.1395					77.969	0.239	1.25702	0.533208				6.506	93.573	0.10489	208.761
			120.59	0.127	1.21792	0.254146				41.471	0.038	0.418845	0.0760437					77.993	0.178	1.53272	0.0904365				5.717	1.666	0.112351	0.846445					66.294	0.145	1.06879	0.323495				5.678	76.873	0.0915409	171.503
			130.3	0.135	1.31599	0.270155				51.995	0.076	0.525134	0.152087					51.507	0.099	1.01222	0.050299				3.596	61.67	0.0706687	31.3327					76.237	0.171	1.2291	0.381501				4.932	71.144	0.0795139	158.722
			88.818	0.129	0.897035	0.258148				26.83	62.509	0.270975	125.09					77.037	0.149	1.51393	0.0757025				13.317	0.092	0.261706	0.0467425					59.172	0.345	0.953973	0.769694				6.922	106.23	0.111597	236.999
			138.532	0.14	1.39913	0.280161				22.291	47.418	0.225132	94.8905					52.311	0.107	1.02802	0.0543635				3.607	42.884	0.0708848	21.7881					68.824	1.864	1.10958	4.15858				3.08	38.637	0.0496559	86.199
			142.903	0.138	1.44328	0.276159				37.312	0.093	0.37684	0.186107					60.559	0.201	1.19011	0.102122				3.752	41.676	0.0737344	21.1743					66.016	0.206	1.06431	0.459585				3.146	44.607	0.0507199	99.5181
			109.981	0.109	1.11078	0.218125				42.896	0.063	0.433237	0.126072					51.761	0.08	1.01721	0.0406456				3.147	49.478	0.0618449	25.1383					75.463	0.375	1.21662	0.836624				1.979	21.626	0.0319055	48.2475
			111.624	0.13	1.12737	0.260149				38.804	0.069	0.391909	0.138079					70.473	0.224	1.38494	0.113808				3.548	63.012	0.0697254	32.0145					64.029	0.263	1.03228	0.586752				4.556	79.75	0.073452	177.922
			66.195	0.127	0.66855	0.254146				2.761	0.157	0.0278853	0.314181					66.116	0.107	1.29931	0.0543635				3.158	49.987	0.0620611	25.3969					69.953	0.208	1.12778	0.464047				2.698	40.315	0.0434973	89.9427
			120.908	0.126	1.22113	0.252145				16.654	24.072	0.1682	48.1717					63.07	0.109	1.23945	0.0553797				5.447	84.556	0.107045	42.9604					71.834	0.191	1.15811	0.42612				2.72	40.727	0.0438519	90.8618
			107.124	0.125	1.08192	0.250144				28.912	41.465	0.292003	82.9777					72.03	0.147	1.41554	0.0746863				8.597	1.688	0.168948	0.857623					63.842	0.195	1.02926	0.435044				6.89	46.95	0.111081	104.745
			102.858	0.097	1.03884	0.194112				16.935	23.854	0.171038	47.7354					69.569	0.125	1.36717	0.0635088				11.175	0.166	0.219611	0.0843397					92.495	0.17	1.49121	0.37927				2.88	45.367	0.0464315	101.214
			114.501	0.157	1.15643	0.314181				65.167	105.556	0.658167	211.233					66.285	0.129	1.30263	0.0655411				3.638	54.303	0.0714941	27.5897					56.735	0.236	0.914684	0.526515				6.694	90.825	0.107921	202.63
			71.783	0.116	0.724987	0.232133				33.101	46.578	0.33431	93.2096					49.693	0.102	0.976568	0.0518232				3.071	52.346	0.0603514	26.5955					77.159	0.176	1.24396	0.392656				2.8	38.286	0.0451417	85.416
			128.455	0.124	1.29736	0.248143				29.063	40.859	0.293528	81.765					49.596	0.103	0.974662	0.0523312				5.938	108.075	0.116694	54.9097					76.511	0.174	1.23351	0.388194				4.074	50.262	0.0656812	112.134
			110.398	0.133	1.11499	0.266153				33.838	49.949	0.341754	99.9554					67.906	0.122	1.33449	0.0619846				20.77	0.056	0.408173	0.0284519					64.563	0.232	1.04089	0.517591				3.987	61.454	0.0642786	137.104
			120.154	0.113	1.21352	0.22613				34.301	47.268	0.34643	94.5903					57.807	0.113	1.13602	0.057412				3.326	44.585	0.0653626	22.6523					77.472	0.157	1.24901	0.350267				2.008	25.741	0.032373	57.4281
			148.324	0.133	1.49803	0.266153				49.618	72.804	0.501127	145.692					67.662	0.1	1.3297	0.050807				4.017	0.274	0.0789422	0.139211					76.238	0.188	1.22911	0.419427				3.143	40.56	0.0506716	90.4893
			138.124	0.116	1.39501	0.232133				47.011	66.931	0.474797	133.939					81.042	0.126	1.59264	0.0640169				3.881	63.835	0.0762695	32.4327					71.732	0.655	1.15647	1.4613				4.536	65.828	0.0731296	146.862
			104.863	0.121	1.05909	0.242139				38.175	63.421	0.385556	126.915					88.084	0.157	1.73103	0.0797671				4.52	0.049	0.0888271	0.0248954					66.424	0.232	1.07089	0.517591				4.216	66.333	0.0679705	147.989
			144.633	0.143	1.46075	0.286164				20.207	26.51	0.204085	53.0505					75.843	0.109	1.49047	0.0553797				10.697	0.258	0.210218	0.131082					68.91	0.202	1.11097	0.450661				1.845	27.53	0.0297452	61.4194
			99.027	0.125	1.00014	0.250144				54.124	81.274	0.546636	162.641					78.32	0.173	1.53915	0.0878962				2.966	46.457	0.0582879	23.6034					70.658	0.388	1.13915	0.865627				3.164	42.314	0.0510101	94.4024
			143.642	0.122	1.45074	0.24414				46.81	76.175	0.472767	152.438					56.47	0.101	1.10975	0.0513151				3.912	59.116	0.0768787	30.0351					74.332	0.23	1.19838	0.513129				1.778	23.318	0.028665	52.0224
			103.232	0.102	1.04261	0.204117				24.005	33.571	0.242443	67.1806					70.733	0.134	1.39005	0.0680814				2.817	40.741	0.0553598	20.6993					61.87	0.216	0.99747	0.481895				3.616	43.898	0.0582973	97.9363
			114.735	0.125	1.15879	0.250144				34.891	47.825	0.352389	95.705					66.117	0.118	1.29933	0.0599523				23.186	0.672	0.455652	0.341423					58.641	0.232	0.945412	0.517591				2.202	28.482	0.0355007	63.5433
			103.126	0.099	1.04154	0.198114				54.805	83.584	0.553514	167.264					70.405	0.116	1.3836	0.0589362				10.046	0.449	0.197424	0.228124					62.986	0.238	1.01546	0.530977				3.249	35.535	0.0523805	79.2785
			148.958	0.118	1.50443	0.236136				62.912	95.503	0.635392	191.116					65.039	0.105	1.27815	0.0533474				3.48	58.377	0.068389	29.6596					69.077	0.228	1.11366	0.508667				3.415	46.524	0.0550568	103.795
			126.344	0.128	1.27604	0.256147				36.512	57.548	0.36876	115.162					72.172	0.108	1.41833	0.0548716				3.014	45.008	0.0592312	22.8672					83.102	0.257	1.33977	0.573366				2.663	33.254	0.042933	74.1896
			102.153	0.11	1.03171	0.220126				35.568	48.944	0.359226	97.9443					69.366	0.132	1.36318	0.0670653				15.564	0.574	0.305864	0.291632					65.755	0.299	1.0601	0.667068				2.903	39.202	0.0468023	87.4596
			136.278	0.128	1.37637	0.256147				26.008	28.122	0.262673	56.2763					84.882	0.133	1.6681	0.0675734				2.192	31.038	0.0430772	15.7695					65.101	0.753	1.04956	1.67994				4.362	69.134	0.0703243	154.238
			93.046	0.108	0.939737	0.216124				39.808	54.381	0.402049	108.825					71.398	0.147	1.40312	0.0746863				2.793	37.431	0.0548881	19.0176					63.89	0.196	1.03004	0.437275				3.098	45.576	0.0499461	101.68
			104.062	0.088	1.051	0.176101				78.735	125.321	0.7952	250.786					54.111	0.131	1.06339	0.0665572				3.325	53.111	0.065343	26.9841					73.11	0.192	1.17868	0.428351				5.38	85.271	0.0867365	190.239
			125.332	0.16	1.26582	0.320184				23.988	33.77	0.242272	67.5788					70.636	0.117	1.38814	0.0594442				2.098	29.086	0.0412299	14.7777					53.764	0.209	0.866785	0.466278				2.603	45.045	0.0419657	100.495
			166.831	0.132	1.68494	0.264152				30.109	46.26	0.304092	92.5732					68.458	0.085	1.34534	0.043186				4.878	90.001	0.0958626	45.7268					57.955	0.313	0.934353	0.698302				2.515	34.285	0.0405469	76.4897
			111.983	0.126	1.13099	0.252145				30.524	39.221	0.308283	78.4871					60.436	0.129	1.18769	0.0655411				7.072	78.771	0.138979	40.0212					72.193	2.309	1.1639	5.15137				6.451	89.706	0.104003	200.134
			137.208	0.133	1.38576	0.266153				45.61	63.354	0.460647	126.781					72.989	0.116	1.43438	0.0589362				3.616	52.155	0.0710617	26.4984					79.285	0.22	1.27824	0.490819				3.497	40.056	0.0563788	89.3648
			142.865	0.127	1.44289	0.254146				31.261	45.2	0.315727	90.452					58.752	0.13	1.1546	0.0660491				3.945	66.957	0.0775272	34.0189					77.347	0.165	1.24699	0.368115				3.404	39.866	0.0548794	88.9409
			118.17	0.122	1.19348	0.24414				40.922	62.078	0.4133	124.227					68.382	0.107	1.34384	0.0543635				16.052	1.158	0.315454	0.588346					62.136	0.181	1.00176	0.403811				6.285	122.522	0.101327	273.346
			108.385	0.127	1.09466	0.254146				25.938	37.117	0.261966	74.2767					81.195	0.139	1.59565	0.0706218				5.387	85.581	0.105865	43.4812					71.432	0.231	1.15163	0.51536				3.678	54.855	0.0592968	122.381
			105.06	0.153	1.06107	0.306176				30.596	41.082	0.30901	82.2112					96.511	0.144	1.89664	0.0731621				3.303	53.765	0.0649106	27.3164					97.993	0.336	1.57985	0.749615				6.083	85.06	0.0980703	189.769
			152.607	0.138	1.54129	0.276159				23.337	33.757	0.235697	67.5528					86.242	0.13	1.69483	0.0660491				2.216	31.437	0.0435489	15.9722					73.381	0.298	1.18305	0.664837				2.977	40.422	0.0479953	90.1814
			116.845	0.195	1.1801	0.390224				21.997	30.116	0.222163	60.2666					58.465	0.138	1.14896	0.0701137				3.608	50.36	0.0709045	25.5864					63.211	0.512	1.01909	1.14227				5.791	108.54	0.0933627	242.152
			128.173	0.136	1.29451	0.272156				39.853	53.478	0.402503	107.017					80.613	0.122	1.58421	0.0619846				3.147	46.224	0.0618449	23.485					85.945	0.161	1.38561	0.359191				6.72	111.247	0.10834	248.192
			138.364	0.151	1.39744	0.302174				30.632	46.825	0.309374	93.7038					45.081	0.093	0.885933	0.0472505				4.056	63.298	0.0797086	32.1598					46.203	0.22	0.744886	0.490819				8.197	111.17	0.132152	248.02
			157.71	0.108	1.59282	0.216124				36.453	49.722	0.368164	99.5012					64.878	0.063	1.27498	0.0320084				2.685	32.393	0.0527657	16.4579					97.011	0.241	1.56401	0.53767				2.74	54.952	0.0441744	122.598
			120.258	0.12	1.21457	0.240138				36.546	49.528	0.369104	99.1129					40.04	0.11	0.786867	0.0558877				2.834	45.741	0.0556938	23.2396					62.296	0.337	1.00434	0.751846				2.383	29.127	0.0384188	64.9823
			146.963	0.129	1.48428	0.258148				35.245	54.68	0.355964	109.423					55.912	0.07	1.09878	0.0355649				10.056	0.069	0.197621	0.0350569					79.482	0.155	1.28141	0.345805				2.967	60.354	0.0478341	134.65
			140.936	0.135	1.42341	0.270155				43.973	60.268	0.444114	120.605					35.611	0.092	0.699828	0.0467425				11.286	0.056	0.221793	0.0284519					73.712	0.151	1.18839	0.336881				5.079	61.212	0.0818838	136.564
			106.692	0.107	1.07756	0.214123				18.325	25.015	0.185077	50.0588					45.479	0.07	0.893754	0.0355649				4.116	66.324	0.0808877	33.6973					50.656	0.26	0.816678	0.580059				3.927	55.055	0.0633112	122.828
			110.203	0.109	1.11302	0.218125				47.57	69.141	0.480443	138.361					39.139	0.107	0.769161	0.0543635				3.692	54.446	0.0725553	27.6624					72.537	0.223	1.16944	0.497512				3.002	41.258	0.0483983	92.0465
			99.238	0.127	1.00227	0.254146				33.851	47.207	0.341885	94.4683					44.153	0.11	0.867696	0.0558877				10.759	0.678	0.211436	0.344472					72.379	0.207	1.1669	0.461816				4.551	58.147	0.0733714	129.726
			111.396	0.13	1.12507	0.260149				35.272	48.097	0.356237	96.2493					44.865	0.112	0.881688	0.0569039				4.498	74.211	0.0883948	37.7044					64.163	0.213	1.03444	0.475202				3.212	39.682	0.051784	88.5304
			142.024	0.116	1.4344	0.232133				26.719	35.988	0.269854	72.0174					58.717	0.102	1.15391	0.0518232				3.183	32.682	0.0625524	16.6048					75.661	0.321	1.21981	0.71615				7.115	113.08	0.114708	252.281
			78.878	0.086	0.796644	0.172099				27.852	39.499	0.281297	79.0434					49.574	0.082	0.974229	0.0416618				3.796	58.592	0.0745991	29.7689					78.054	0.225	1.25839	0.501974				3.539	40.584	0.0570559	90.5428
			119.662	0.119	1.20855	0.238137				41.487	67.394	0.419006	134.865					34.803	0.109	0.683949	0.0553797				3.199	47.06	0.0628668	23.9098					58.964	0.21	0.95062	0.468509				6.707	96.268	0.10813	214.774
			95.434	0.1	0.963855	0.200115				26.863	36.792	0.271308	73.6263					34.364	0.696	0.675322	0.353617				4.521	64.903	0.0888468	32.9753					60.42	0.214	0.974093	0.477433				3.91	62.781	0.0630372	140.064
			117.102	0.108	1.1827	0.216124				55.132	78.438	0.556817	156.966					53.238	0.063	1.04623	0.0320084				4.932	62.835	0.0969238	31.9246					68.763	0.264	1.1086	0.588983				6.231	78.857	0.100456	175.93
			126.501	0.118	1.27762	0.236136				32.268	49.413	0.325897	98.8828					39.481	0.085	0.775882	0.043186				4.245	79.594	0.0834228	40.4394					86.2	0.232	1.38972	0.517591				4.694	54	0.0756768	120.474
			155.721	0.119	1.57274	0.238137				39.541	52.153	0.399352	104.366					41.247	0.091	0.810587	0.0462344				17.344	5.19	0.340845	2.63689					52.973	0.302	0.854033	0.673761				6.443	76.54	0.103874	170.761
			139.764	0.126	1.41157	0.252145				43.429	67.153	0.43862	134.383					43.905	0.154	0.862822	0.0782428				2.76	37.939	0.0542396	19.2757					58.811	0.233	0.948153	0.519822				6.782	94.089	0.10934	209.912
			133.403	0.12	1.34733	0.240138				30.301	41.99	0.306031	84.0283					53.478	0.086	1.05095	0.0436941				3.924	54.98	0.0771145	27.9337					62.55	0.239	1.00843	0.533208				5.065	65.135	0.0816581	145.316
			156.194	0.122	1.57751	0.24414				34.341	45.152	0.346834	90.3559					41.17	0.088	0.809074	0.0447102				9.267	0.451	0.182115	0.22914					60.799	0.238	0.980204	0.530977				5.044	59.19	0.0813195	132.053
			107.253	0.096	1.08322	0.19211				31.474	41.967	0.317878	83.9823					45.116	0.085	0.886621	0.043186				3.767	59.473	0.0740292	30.2165					58.101	0.257	0.936706	0.573366				25.969	0.17	0.418673	0.37927
			143.918	0.125	1.45353	0.250144				36.04	56.844	0.363993	113.753					43.812	0.091	0.860994	0.0462344				3.374	52.737	0.0663059	26.7941					32.858	0.321	0.529738	0.71615				3.74	43.807	0.0602964	97.7333
			130.39	0.121	1.3169	0.242139				43.732	64.441	0.44168	128.956					34.531	0.877	0.678604	0.445578				3.758	53.555	0.0738523	27.2097					89.942	0.331	1.45005	0.73846				5.547	69.101	0.0894289	154.164
			121.539	0.115	1.22751	0.230132				60.355	86.263	0.609567	172.625					45.271	0.06	0.889667	0.0304842				2.613	39.949	0.0513507	20.2969					95.69	0.223	1.54272	0.497512				5.914	85.809	0.0953457	191.44
			116.779	0.13	1.17943	0.260149				50.749	72.629	0.51255	145.342					57.641	0.118	1.13276	0.0599523				14.246	0.488	0.279963	0.247938					92.272	0.215	1.48761	0.479664				2.241	29.253	0.0361295	65.2634
			106.786	0.113	1.07851	0.22613				34.506	49.716	0.3485	99.4892					47.584	0.084	0.935122	0.0426779				2.195	27.654	0.0431362	14.0502					63.504	0.198	1.02381	0.441737				5.276	42.881	0.0850599	95.6674
			134.085	0.139	1.35422	0.27816				37.714	59.463	0.3809	118.994					39.941	0.549	0.784921	0.278931				2.521	33.655	0.0495428	17.0991					70.311	0.289	1.13356	0.644758				7.333	102.872	0.118223	229.507
			179.406	0.112	1.81195	0.224129				49.582	82.441	0.500763	164.977					41.149	0.08	0.808661	0.0406456				3.185	45.947	0.0625917	23.3443					66.382	0.326	1.07021	0.727305				4.106	50.024	0.0661971	111.603
			120.526	0.116	1.21728	0.232133				37.348	53.742	0.377204	107.546					40.004	0.106	0.78616	0.0538555				2.116	26.308	0.0415837	13.3663					63.614	0.254	1.02559	0.566673				3.628	36.001	0.0584907	80.3181
			155.736	0.193	1.57289	0.386222				55.704	99.946	0.562594	200.007					40.74	0.104	0.800623	0.0528393				4.815	81.77	0.0946245	41.5449					54.587	0.284	0.880054	0.633603				3.862	50.511	0.0622633	112.69
			145.555	0.121	1.47006	0.242139				31.168	42.074	0.314787	84.1964					35.385	0.09	0.695387	0.0457263				3.495	47.285	0.0686838	24.0241					61.78	0.274	0.996019	0.611293				4.103	59.78	0.0661487	133.369
			135.531	0.113	1.36882	0.22613				33.37	52.079	0.337027	104.218					40.957	0.069	0.804888	0.0350569				3.88	60.328	0.0762499	30.6509					48.07	0.361	0.774986	0.80539				14.355	0.044	0.231432	0.0981639
			192.077	0.126	1.93992	0.252145				62.543	94.946	0.631666	190.001					35.052	0.088	0.688843	0.0447102				14.692	1.098	0.288728	0.557861					77.093	0.243	1.2429	0.542132				4.458	69.974	0.071872	156.112
			167.281	0.161	1.68949	0.322185				47.484	66.55	0.479574	133.177					34.167	17.761	0.671451	9.02384				3.911	65.216	0.0768591	33.1343					80.037	0.223	1.29036	0.497512				6.551	98.229	0.105615	219.149
			133.796	0.124	1.3513	0.248143				47.269	66.704	0.477403	133.485					44.739	0.09	0.879212	0.0457263				3.129	47.408	0.0614912	24.0866					68.563	0.217	1.10538	0.484126				2.906	43.896	0.0468506	97.9319
			189.27	0.138	1.91157	0.276159				42.923	70.286	0.433509	140.653					34.763	0.054	0.683163	0.0274358				2.224	28.692	0.0437061	14.5776					70.166	0.215	1.13122	0.479664				8.331	151.298	0.134313	337.545
			185.544	0.156	1.87394	0.312179				36.367	52.93	0.367296	105.921					43.264	0.102	0.850225	0.0518232				3.379	45.215	0.0664042	22.9724					67.967	0.454	1.09577	1.01287				6.328	96.798	0.10202	215.956
			146.037	0.106	1.47493	0.212122				32.804	45.249	0.331311	90.55					37.708	0.073	0.741039	0.0370891				3.013	40.562	0.0592115	20.6084					62.93	0.256	1.01456	0.571135				3.744	40.907	0.0603609	91.2634
			103.431	0.113	1.04462	0.22613				35.099	54.786	0.354489	109.635					44.788	0.066	0.880175	0.0335326				3.567	53.97	0.0700988	27.4206					73.375	0.342	1.18295	0.763001				3.614	39.15	0.058265	87.3435
			114.608	0.117	1.15751	0.234135				47.264	69.322	0.477352	138.724					43.954	0.043	0.863785	0.021847				2.659	29.057	0.0522547	14.763					62.511	0.224	1.0078	0.499743				7.664	99.627	0.123559	222.268
			134.451	0.122	1.35791	0.24414				39.703	64.571	0.400988	129.216					40.745	0.097	0.800722	0.0492828				9.364	0.062	0.184022	0.0315004					73.257	0.198	1.18105	0.441737				4.843	52.712	0.078079	117.6
			159.832	0.148	1.61426	0.29617				32.001	46.643	0.323201	93.3396					52.033	0.065	1.02255	0.0330246				2.952	43.227	0.0580128	21.9624					62.913	0.297	1.01429	0.662606				3.842	55.37	0.0619409	123.53
			150.199	0.115	1.51697	0.230132				39.354	64.231	0.397464	128.536					42.058	0.082	0.826525	0.0416618				9.77	0.058	0.192	0.0294681					31.991	0.407	0.51576	0.908016				8.376	69.104	0.135038	154.171
			147.685	0.1	1.49157	0.200115				38.527	61.125	0.389111	122.32					46.172	0.057	0.907373	0.02896				3.41	48.126	0.0670134	24.4514					69.834	0.194	1.12587	0.432813				7.162	91.757	0.115466	204.71
			138.602	0.137	1.39984	0.274158				35.221	54.046	0.355722	108.154					47.133	0.053	0.926259	0.0269277				3.143	46.494	0.0617663	23.6222					64.213	0.311	1.03524	0.69384				2.6	8.217	0.0419173	18.3321
			135.991	0.141	1.37347	0.282162				33.443	0.098	0.337764	0.196113					37.536	0.063	0.737658	0.0320084				9.593	0.46	0.188522	0.233712					88.903	0.19	1.4333	0.423889				8.271	65.246	0.133345	145.564
			181.894	0.12	1.83708	0.240138				29.073	0.076	0.293629	0.152087					38.409	0.069	0.754815	0.0350569				4.077	59.482	0.0801213	30.221					74.623	0.214	1.20307	0.477433				6.173	79.23	0.0995213	176.762
			155.202	0.1	1.56749	0.200115				19.772	2.568	0.199691	5.13895					36.109	0.058	0.709615	0.0294681				4.188	66.123	0.0823027	33.5951					75.702	0.206	1.22047	0.459585				2.786	42.322	0.044916	94.4203
			161.53	0.125	1.6314	0.250144				46.565	0.107	0.470293	0.214123					42.537	0.066	0.835938	0.0335326				3.188	30.366	0.0626507	15.4281					63.81	0.297	1.02875	0.662606				8.924	129.602	0.143873	289.142
			167.36	0.119	1.69029	0.238137				42.302	0.137	0.427238	0.274158					36.804	0.063	0.723273	0.0320084				3.864	52.59	0.0759354	26.7194					60.713	0.276	0.978817	0.615755				4.675	89.928	0.0753705	200.629
			154.584	0.128	1.56125	0.256147				21.104	0.064	0.213144	0.128074					52.949	0.086	1.04056	0.0436941				3.1	33.252	0.0609213	16.8944					75.51	0.188	1.21737	0.419427				5.768	101.645	0.0929919	226.77
			179.736	0.135	1.81528	0.270155				24.102	33.492	0.243423	67.0225					40.492	0.059	0.79575	0.0299762				2.89	41.595	0.0567943	21.1332					56.044	0.229	0.903543	0.510898				3.507	60.499	0.05654	134.973
			141.249	0.13	1.42657	0.260149				44.723	0.041	0.451689	0.0820471					41.926	0.092	0.823931	0.0467425				4.247	60.382	0.0834621	30.6783					76.571	0.187	1.23448	0.417196				4.722	65.237	0.0761283	145.544
			143.579	0.152	1.45011	0.304175				43.204	0.025	0.436348	0.0500287					30.666	0.098	0.602649	0.0497909				4.192	54.856	0.0823813	27.8707					78.683	0.48	1.26853	1.07088				3.594	56.625	0.0579426	126.33
			161.88	0.122	1.63494	0.24414				44.465	0.157	0.449083	0.314181					33.93	0.067	0.666793	0.0340407				4.597	56.467	0.0903404	28.6892					58.114	0.212	0.936916	0.472971				6.596	88.907	0.106341	198.351
			177.172	0.106	1.78938	0.212122				22.562	0.019	0.227869	0.0380218					43.28	0.069	0.85054	0.0350569				3.936	70.932	0.0773504	36.0384					60.272	0.25	0.971707	0.557749				4.244	44.541	0.0684219	99.3709
			154.682	0.103	1.56224	0.206118				16.879	0.02	0.170473	0.040023					43.256	0.061	0.850068	0.0309923				2.844	42.06	0.0558904	21.3694					55.974	0.289	0.902415	0.644758				3.26	44.433	0.0525578	99.1299
			196.454	0.122	1.98413	0.24414				22.934	0.02	0.231627	0.040023					31.798	0.087	0.624895	0.0442021				4.787	79.521	0.0940742	40.4023					65.292	0.208	1.05264	0.464047				3.188	46.011	0.051397	102.65
			129.318	0.179	1.30607	0.358206				36.44	0.1	0.368033	0.200115					37.485	0.066	0.736656	0.0335326				4.667	77.65	0.091716	39.4517					65.035	0.292	1.0485	0.651451				5.749	78.895	0.0926856	176.015
			157.355	0.138	1.58924	0.276159				25.788	0.021	0.260451	0.0420241					31.32	0.067	0.615501	0.0340407				6.036	124.905	0.11862	63.4605					62.78	0.303	1.01214	0.675992				4.171	61.998	0.067245	138.317
			163.731	0.132	1.65363	0.264152				8.85	0.643	0.0893824	1.28674					34.487	0.044	0.677739	0.0223551				4	64.52	0.0786081	32.7807					56.812	0.198	0.915925	0.441737				2.763	52.536	0.0445452	117.208
			199.483	0.135	2.01472	0.270155				8.461	0.837	0.0854536	1.67496					9.742	0.043	0.19145	0.021847				3.713	59.615	0.072968	30.2886					96.933	0.19	1.56276	0.423889				4.577	40.157	0.0737906	89.5902
			161.334	0.123	1.62943	0.246141				25.369	0.109	0.256219	0.218125					48.913	0.095	0.961239	0.0482667				2.764	41.058	0.0543182	20.8604					68.279	0.306	1.1008	0.682685				5.775	77.96	0.0931048	173.929
			144.151	0.125	1.45588	0.250144				29.695	0.058	0.299911	0.116067					42.929	0.112	0.843642	0.0569039				3.773	45.841	0.0741471	23.2905					66.197	0.213	1.06723	0.475202				5.288	88.754	0.0852533	198.01
			191.097	0.118	1.93002	0.236136				25.472	0.034	0.25726	0.0680391					16.223	0.079	0.318815	0.0401376				2.748	37.757	0.0540038	19.1832					32.489	0.225	0.523789	0.501974				4.323	64.051	0.0696956	142.898
			149.108	0.121	1.50595	0.242139				29.442	0.206	0.297355	0.412237					44.21	0.087	0.868816	0.0442021				4.148	73.758	0.0815166	37.4743					75.101	0.253	1.21078	0.564442				2.551	54.856	0.0411273	122.384
			174.305	0.125	1.76043	0.250144				33.068	0.144	0.333977	0.288166					45.778	0.104	0.89963	0.0528393				2.905	55.072	0.0570891	27.9805					50.695	0.362	0.817307	0.807621				3.086	44.484	0.0497526	99.2437
			141.046	0.111	1.42452	0.222128				33.357	0.024	0.336896	0.0480276					39.029	0.047	0.766999	0.0238793				4.087	72.036	0.0803178	36.5994					41.549	0.204	0.669854	0.455123				5.688	69.226	0.0917021	154.443
			172.485	0.134	1.74205	0.268154				31.635	0.027	0.319504	0.054031					25.862	0.067	0.508241	0.0340407				4.057	58.938	0.0797283	29.9447					65.622	0.169	1.05796	0.377039				6.303	75.071	0.101617	167.483
			140.204	0.143	1.41602	0.286164				20.611	48.713	0.208165	97.482					32.532	0.053	0.63932	0.0269277				3.349	46.788	0.0658146	23.7716					70.618	0.168	1.13851	0.374808				3.855	55.556	0.0621504	123.945
			161.273	0.118	1.62881	0.236136				8.515	0.189	0.085999	0.378217					41.628	0.083	0.818074	0.0421698				3.873	69.384	0.0761123	35.252					58.845	0.324	0.948701	0.722843				6.369	109.878	0.102681	245.138
			147.968	0.117	1.49443	0.234135				22.382	5.104	0.226052	10.2139					40.066	0.077	0.787378	0.0391214				3.651	63.836	0.0717495	32.4332					72.403	0.2	1.16728	0.446199				5.24	77.419	0.0844795	172.722
			179.124	0.103	1.8091	0.206118				31.49	2.94	0.31804	5.88338					11.361	0.081	0.223267	0.0411537				3.903	55.493	0.0767018	28.1943					98.252	0.158	1.58402	0.352498				13.403	0.102	0.216084	0.227562
			210.574	0.12	2.12673	0.240138				37.314	0.023	0.37686	0.0460264					22.235	0.085	0.436963	0.043186				7.978	148.194	0.156784	75.293					79.619	0.179	1.28362	0.399349				4.549	69.432	0.0733391	154.903
			174.576	0.109	1.76317	0.218125				26.763	63.57	0.270298	127.213					44.348	0.07	0.871528	0.0355649				2.582	41.174	0.0507415	20.9193					64.928	0.275	1.04677	0.613524				2.882	49.368	0.0464637	110.14
			107.796	0.131	1.08871	0.262151				38.665	0.088	0.390505	0.176101					33.206	0.05	0.652565	0.0254035				6.687	115.409	0.131413	58.6359					78.607	0.257	1.2673	0.573366				7.909	117.4	0.127509	261.919
			112.984	0.137	1.1411	0.274158				44.671	0.022	0.451164	0.0440253					38.205	0.061	0.750806	0.0309923				3.709	51.446	0.0728894	26.1382					60.215	0.197	0.970788	0.439506				4.431	74.704	0.0714367	166.664
			105.284	0.125	1.06334	0.250144				33.566	0.062	0.339007	0.124071					28.438	0.065	0.558864	0.0330246				24.476	0.195	0.481003	0.0990737					62.44	0.232	1.00666	0.517591				4.877	69.991	0.0786272	156.15
			107.285	0.182	1.08355	0.364209				40.314	0.064	0.407159	0.128074					36.574	0.038	0.718753	0.0193067				6.337	96.238	0.124535	48.8957					60.402	0.183	0.973803	0.408273				4.997	71.543	0.0805618	159.612
			114.317	0.131	1.15457	0.262151				28.712	0.62	0.289983	1.24071					47.219	0.074	0.927949	0.0375972				4.853	77.867	0.0953713	39.5619					62.05	0.218	1.00037	0.486357				2.511	37.777	0.0404824	84.2804
			99.297	0.156	1.00287	0.312179				15.564	24.172	0.157192	48.3718					17.869	0.084	0.351162	0.0426779				3.9	71.727	0.0766429	36.4424					73.491	0.181	1.18482	0.403811				5.288	57.647	0.0852533	128.61
			116.393	0.127	1.17553	0.254146				17.068	25.631	0.172382	51.2915					33.188	0.1	0.652211	0.050807				4.268	62.838	0.0838748	31.9261					70.723	0.185	1.1402	0.412734				4.708	78.908	0.0759025	176.044
			109.265	0.14	1.10354	0.280161				14.606	30.334	0.147516	60.7029					45.315	0.077	0.890531	0.0391214				2.329	37.261	0.0457696	18.9312					80.437	0.168	1.29681	0.374808				4.99	73.748	0.080449	164.532
			76.061	0.104	0.768193	0.20812				44.266	0.053	0.447073	0.106061					41.177	0.075	0.809211	0.0381053				16.578	0.353	0.325791	0.179349					66.946	0.169	1.07931	0.377039				5.505	75.938	0.0887518	169.417
			107.812	0.122	1.08887	0.24414				23.762	1.583	0.239989	3.16782					26.879	0.071	0.528227	0.036073				3.682	56.448	0.0723588	28.6796					5.882	0.869	0.0948298	1.93874				3.998	72.885	0.0644559	162.606
			95.279	0.121	0.962289	0.242139				21.499	52.394	0.217133	104.848					48.75	0.06	0.958036	0.0304842				2.402	33.275	0.0472042	16.906					69.12	0.256	1.11436	0.571135				4.48	65.182	0.0722267	145.421
			82.229	0.139	0.830488	0.27816				25.253	0.252	0.255048	0.50429					14.023	0.173	0.27558	0.0878962				16.347	0.185	0.321252	0.093993					79.269	0.253	1.27798	0.564442				5.401	83.61	0.0870751	186.534
			96.902	0.109	0.978681	0.218125				1.382	0.412	0.0139578	0.824474					33.224	0.095	0.652919	0.0482667				5.229	70.356	0.10276	35.7458					83.778	0.277	1.35067	0.617986				6.188	122.624	0.0997632	273.574
			11.763	0.355	0.118803	0.710408				15.593	37.456	0.157485	74.9551					37.468	0.056	0.736322	0.0284519				2.449	42.739	0.0481278	21.7144					3.976	0.283	0.0641012	0.631372				6.904	118.069	0.111307	263.412
			112.571	0.132	1.13693	0.264152				28.175	0.689	0.284559	1.37879					28.837	0.155	0.566705	0.0787509				3.621	63.784	0.07116	32.4068					77.186	0.195	1.2444	0.435044				3.906	51.574	0.0629727	115.061
			105.969	0.164	1.07026	0.328189				24.695	0.018	0.249412	0.0360207					37.622	0.084	0.739348	0.0426779				7.303	3.567	0.143519	1.81229					71.986	0.234	1.16056	0.522053				10.68	183.298	0.172183	408.937
			101.918	0.125	1.02934	0.250144				17.283	0.042	0.174553	0.0840483					26.148	0.1	0.513861	0.050807				16.225	0.256	0.318854	0.130066					34.099	0.452	0.549745	1.00841				13.685	211.048	0.22063	470.848
			75.982	0.126	0.767396	0.252145				42.305	0.097	0.427268	0.194112					33.528	0.068	0.658893	0.0345488				21.383	0.81	0.420219	0.411537					66.588	0.328	1.07353	0.731767				3.195	43.92	0.0515099	97.9854
			72.56	0.154	0.732834	0.308177				31.825	71.225	0.321423	142.532					14.258	0.088	0.280199	0.0447102				15.977	0.108	0.31398	0.0548716					85.47	0.283	1.37795	0.631372				5.046	87.158	0.0813518	194.449
			14.133	0.419	0.142739	0.838482				24.291	40.745	0.245332	81.5368					29.777	0.077	0.585178	0.0391214				4.15	84.596	0.0815559	42.9807					93.859	0.298	1.5132	0.664837				3.946	79.486	0.0636176	177.333
			131.127	0.112	1.32434	0.224129				36.009	0.271	0.36368	0.542312					40.535	0.074	0.796595	0.0375972				4.943	0.125	0.09714	0.0635088					76.19	0.209	1.22834	0.466278				7.351	121.503	0.118513	271.073
			10.08	0.29	0.101805	0.580333				16.775	26.172	0.169422	52.3741					39.076	0.085	0.767922	0.043186				4.516	0.07	0.0887485	0.0355649					89.209	6.551	1.43823	14.6153				6.349	118.665	0.102359	264.741
			93.207	0.113	0.941363	0.22613				16.936	24.866	0.171049	49.7606					34.804	0.062	0.683969	0.0315004				5.227	107.509	0.102721	54.6221					56.559	0.213	0.911846	0.475202				6.753	93.094	0.108872	207.692
			89.979	0.14	0.908761	0.280161				39.749	0.132	0.401453	0.264152					29.049	0.095	0.570872	0.0482667				3.022	39.884	0.0593884	20.2639					74.236	0.287	1.19684	0.640296				3.306	56.946	0.0532994	127.046
			11.401	0.333	0.115147	0.666383				19.863	49.46	0.20061	98.9769												3.523	50.474	0.0692341	25.6443					74.612	0.259	1.2029	0.577828				2.877	50.284	0.0463831	112.183
			100.329	0.125	1.01329	0.250144				31.147	67.903	0.314575	135.884												5.984	122.466	0.117598	62.2213					115.981	0.242	1.86985	0.539901				4.729	73.958	0.0762411	165
			10.181	0.298	0.102825	0.596343				32.817	0.944	0.331442	1.88909												7.505	0.178	0.147488	0.0904365					73.494	0.173	1.18487	0.385963				2.905	49.532	0.0468345	110.506
			108.959	0.136	1.10045	0.272156				42.782	0.361	0.432085	0.722415												6.78	107.707	0.133241	54.7227					81.453	0.268	1.31319	0.597907				5.15	103.871	0.0830285	231.736
			132.61	0.129	1.33932	0.258148				16.518	35.693	0.166827	71.427												7.27	108.972	0.14287	55.3654					91.479	0.197	1.47483	0.439506				4.042	75.866	0.0651653	169.257
			110.892	0.135	1.11998	0.270155				20.576	0.126	0.207811	0.252145												4.642	73.629	0.0912247	37.4087					40.044	0.38	0.645591	0.847779				4.349	50.118	0.0701147	111.813
			108.982	0.118	1.10069	0.236136				29.332	0.044	0.296244	0.0880506												10.576	0.084	0.20784	0.0426779					83.355	0.224	1.34385	0.499743				3.685	52.989	0.0594097	118.218
			125.783	0.139	1.27037	0.27816				20.146	1.178	0.203469	2.35735												3.974	63.964	0.0780971	32.4982					80.886	0.295	1.30405	0.658144				3.114	46.064	0.050204	102.769
			136.14	0.128	1.37497	0.256147				33.305	0.124	0.336371	0.248143												6.542	108.928	0.128564	55.3431					80.292	0.215	1.29447	0.479664				3.263	46.113	0.0526062	102.878
			119.823	0.14	1.21018	0.280161				19.82	43.839	0.200176	87.7284												7.252	101.509	0.142516	51.5737					5.89	0.979	0.0949588	2.18415				6.349	81.63	0.102359	182.116
			75.838	0.119	0.765941	0.238137				17.131	32.789	0.173018	65.6157												4.671	78.912	0.0917946	40.0929					81.907	0.201	1.32051	0.44843				5.373	108.76	0.0866237	242.643
			121.532	0.16	1.22744	0.320184				20.599	1.662	0.208044	3.32591												7.476	110.28	0.146919	56.03					77.036	0.346	1.24198	0.771925				4.252	55.922	0.0685509	124.762
			121.828	0.122	1.23043	0.24414				1.908	2.223	0.0192702	4.44856												4.831	99.598	0.0949389	50.6028					50.749	0.203	0.818177	0.452892				3.552	53.559	0.0572655	119.49
			109.411	0.13	1.10502	0.260149				14.595	0.048	0.147405	0.0960552												6.169	135.221	0.121233	68.7018					103.28	0.198	1.66508	0.441737				6.364	108.562	0.102601	242.202
			99.195	0.145	1.00184	0.290167				24.385	56.256	0.246281	112.577												7.839	69.307	0.154052	35.2128					68.399	0.387	1.10273	0.863396				3.688	49.553	0.0594581	110.553
			111.535	0.112	1.12647	0.224129				17.102	0.067	0.172725	0.134077												7.636	124.531	0.150063	63.2705					67.957	0.317	1.09561	0.707226				3.305	68.852	0.0532833	153.609
			102.634	0.13	1.03657	0.260149				43.838	0.373	0.442751	0.746429												4.895	82.754	0.0961967	42.0449					2.375	0.29	0.0382898	0.646989				6.93	111.449	0.111726	248.642
			108.023	0.124	1.091	0.248143				19.676	0.066	0.198722	0.132076												3.984	64.329	0.0782937	32.6837					2.934	0.34	0.0473021	0.758539				3.174	49.511	0.0511713	110.459
			122.967	0.127	1.24193	0.254146				20.043	0.992	0.202428	1.98514												4.904	85.702	0.0963735	43.5426					73.656	0.421	1.18748	0.93925				2.696	35.583	0.043465	79.3856
			115.199	0.12	1.16348	0.240138				50.523	0.477	0.510267	0.954548												5.709	69.716	0.112193	35.4206					61.16	0.286	0.986024	0.638065				3.451	64.347	0.0556371	143.558
			102.077	0.139	1.03095	0.27816				27.195	65.133	0.274661	130.341												6.332	86.805	0.124437	44.103					82.84	0.371	1.33555	0.8277				6.983	109.823	0.11258	245.015
			122.492	0.132	1.23713	0.264152				7.523	1.254	0.0759801	2.50944												5.696	108.569	0.111938	55.1607					69.52	0.259	1.1208	0.577828				3.348	37.507	0.0539766	83.678
			137.365	0.112	1.38735	0.224129				41.771	0.029	0.421875	0.0580333												8.228	163.366	0.161697	83.0014					80.614	0.302	1.29966	0.673761				3.048	38.821	0.04914	86.6095
			91.778	0.119	0.92693	0.238137				17.389	42.369	0.175624	84.7867												6.463	134.323	0.127011	68.2455					54.177	0.338	0.873444	0.754077				1.226	0.16	0.0197656	0.35696
			101.782	0.123	1.02797	0.246141				15.028	0.031	0.151778	0.0620356												5.552	107.265	0.109108	54.4982					64.493	0.449	1.03976	1.00172				17.61	0.069	0.283909	0.153939
			91.199	0.115	0.921083	0.230132				17.566	41.032	0.177411	82.1112												3.924	61.757	0.0771145	31.3769					71.662	0.377	1.15534	0.841086				4.609	71.564	0.0743065	159.659
			111.446	0.122	1.12557	0.24414				21.907	0.039	0.221254	0.0780448												4.659	71.966	0.0915588	36.5638					4.256	0.581	0.0686154	1.29621				4.788	63.304	0.0771923	141.231
			109.74	0.13	1.10834	0.260149				28.302	0.099	0.285842	0.198114												3.141	51.674	0.061727	26.254					4.597	0.606	0.074113	1.35198				3.53	57.236	0.0569108	127.693
			127.856	0.132	1.29131	0.264152				42.961	0.048	0.433893	0.0960552												6.814	138.404	0.133909	70.319					6.869	0.871	0.110742	1.9432				4.78	71.156	0.0770633	158.749
			98.725	0.118	0.997093	0.236136				35.537	0.044	0.358913	0.0880506												5.405	103.183	0.106219	52.4242					6.654	1.005	0.107276	2.24215				2.545	39.423	0.0410306	87.9526
			109.502	0.139	1.10594	0.27816				14.084	27.224	0.142244	54.4793												4.929	81.727	0.0968648	41.5231					124.592	14.064	2.00868	31.3767				2.142	32.089	0.0345334	71.5905
			98.43	0.118	0.994114	0.236136				25.764	0.174	0.260209	0.3482												4.276	64.625	0.0840321	32.834					72.402	0.283	1.16727	0.631372				3.229	54.649	0.0520581	121.922
			96.914	0.148	0.978802	0.29617				8.757	0.667	0.0884431	1.33477												4.324	71.981	0.0849754	36.5714					36.028	0.313	0.580845	0.698302				1.998	24.856	0.0322118	55.4537
			127.469	0.144	1.2874	0.288166				54.439	0.024	0.549818	0.0480276												5.532	99.341	0.108715	50.4722					87.783	1.46	1.41524	3.25726				2.298	35.384	0.0370484	78.9416
			87.392	0.129	0.882633	0.258148				24.361	55.095	0.246039	110.253												6.604	117.278	0.129782	59.5855					3.671	0.485	0.059184	1.08203				2.49	30.086	0.0401439	67.1218
			110.506	0.124	1.11608	0.248143				12.896	25.56	0.130246	51.1494												3.792	67.192	0.0745205	34.1383					79.802	0.236	1.28657	0.526515				2.652	32.283	0.0427556	72.0233
			104.996	0.143	1.06043	0.286164				54.074	0.115	0.546131	0.230132												4.435	75.417	0.0871567	38.3171					54.44	0.276	0.877684	0.615755				3.562	70.23	0.0574267	156.683
			114.292	0.124	1.15432	0.248143				23.689	57.272	0.239252	114.61												3.66	54.802	0.0719264	27.8433					69.85	0.289	1.12612	0.644758				4.009	63.184	0.0646332	140.963
			123.823	0.149	1.25058	0.298171				28.407	69.187	0.286902	138.454												3.676	45.46	0.0722408	23.0969					29.237	0.604	0.47136	1.34752				2.976	31.63	0.0479792	70.5664
			125.735	0.148	1.26989	0.29617				26.626	71.119	0.268915	142.32												3.096	54.777	0.0608427	27.8306					7.662	0.714	0.123527	1.59293				3.491	58.562	0.056282	130.652
			129.632	0.144	1.30924	0.288166				14.527	34.618	0.146718	69.2758												3.933	59.37	0.0772914	30.1641					72.953	0.243	1.17615	0.542132				3.187	49.021	0.0513809	109.366
			105.947	0.153	1.07003	0.306176				30.587	0.095	0.30892	0.190109												3.224	53.815	0.0633581	27.3418					96.152	0.232	1.55017	0.517591				1.93	13.459	0.0311155	30.027
			134.426	0.13	1.35766	0.260149				25.754	62.56	0.260108	125.192												6.893	125.169	0.135461	63.5947					64.363	0.336	1.03766	0.749615				4.988	85.321	0.0804167	190.351
			110.052	0.143	1.11149	0.286164				57.335	0.67	0.579066	1.34077												2.848	38.691	0.055969	19.6578					6.46	1.015	0.104148	2.26446				2.881	42.871	0.0464476	95.6451
			92.914	0.111	0.938404	0.222128				34.299	0.457	0.34641	0.914525												9.121	150.207	0.179246	76.3157					27.434	30.19	0.442292	67.3538				21.281	0.202	0.343093	0.450661
			90.46	0.139	0.913619	0.27816				15.071	35.292	0.152213	70.6246												4.565	84.479	0.0897115	42.9213					79.191	0.294	1.27672	0.655913				3.755	78.256	0.0605382	174.589
			145.77	0.158	1.47223	0.316182				22.358	50.439	0.225809	100.936												7.083	139.894	0.139195	71.076					98.101	0.218	1.58159	0.486357				4.626	95.387	0.0745805	212.808
			110.588	0.136	1.11691	0.272156				52.922	0.022	0.534496	0.0440253												6.181	88.381	0.121469	44.9038					95.655	0.236	1.54215	0.526515				1.882	10.858	0.0303417	24.2242
			106.908	0.128	1.07974	0.256147				24.994	0.174	0.252432	0.3482												4.348	71.693	0.085447	36.4251					82.574	0.22	1.33126	0.490819				5.143	70.884	0.0829156	158.142
			89.345	0.134	0.902358	0.268154				59.091	0.047	0.596801	0.094054												5.993	110.086	0.117775	55.9314					61.476	0.169	0.991118	0.377039				1.021	6.433	0.0164606	14.352
			122.13	0.138	1.23348	0.276159				21.426	1.127	0.216396	2.2553												5.713	108.026	0.112272	54.8848					81.308	0.244	1.31085	0.544363				2.381	35.925	0.0383866	80.1486
			91.255	0.112	0.921648	0.224129				38.71	0.024	0.390959	0.0480276												4.566	71.472	0.0897311	36.3128					77.963	0.227	1.25692	0.506436				4.317	63.951	0.0695988	142.675
			105.486	0.125	1.06538	0.250144				44.016	0.029	0.444548	0.0580333												5.101	78.478	0.100245	39.8723					76.824	0.206	1.23856	0.459585				3.529	45.308	0.0568947	101.082
			106.904	0.11	1.0797	0.220126				13.742	0.087	0.13879	0.1741												4.226	64.67	0.0830495	32.8569					61.792	0.198	0.996213	0.441737				3.213	74.565	0.0518001	166.354
			151.192	0.154	1.52699	0.308177				21.246	33.001	0.214578	66.0399												4.075	71.33	0.080082	36.2407					74.172	0.234	1.1958	0.522053				2.153	26.59	0.0347107	59.3222
			135.885	0.111	1.3724	0.222128				13.81	0.064	0.139477	0.128074												5.699	96.256	0.111997	48.9048					72.655	0.261	1.17135	0.58229				14.829	0.271	0.239074	0.6046
			102.542	0.136	1.03564	0.272156				28.063	69.438	0.283428	138.956												4.897	78.225	0.096236	39.7438					74.018	0.242	1.19332	0.539901				3.16	39.418	0.0509456	87.9415
			109.149	0.132	1.10237	0.264152				18.98	45.8	0.191692	91.6527												5.031	82.864	0.0988693	42.1007					55.017	0.275	0.886986	0.613524				2.108	26.699	0.0339853	59.5654
			82.537	0.135	0.833599	0.270155				28.449	68.498	0.287326	137.075												5.835	85.396	0.11467	43.3872					53.398	0.237	0.860884	0.528746				2.238	32.252	0.0360811	71.9541
			126.617	0.148	1.27879	0.29617				18.475	42.037	0.186592	84.1223												5.131	81.769	0.100835	41.5444					91.039	0.377	1.46773	0.841086				4.162	59.949	0.0670999	133.746
			134.914	0.177	1.36259	0.354204				19.084	46.375	0.192743	92.8033												5.051	85.977	0.0992624	43.6824					51.997	0.203	0.838297	0.452892				4.359	74.697	0.070276	166.649
			121.617	0.128	1.2283	0.256147				21.388	51.129	0.216012	102.317												7.786	110.286	0.153011	56.0331					81.105	0.262	1.30758	0.584521				4.751	71.432	0.0765958	159.365
			97.177	0.135	0.981459	0.270155				22.362	52.17	0.22585	104.4												4.923	71.096	0.0967469	36.1218					57.361	0.211	0.924776	0.47074				6.351	85.42	0.102391	190.572
			111.267	0.13	1.12376	0.260149				30.561	70.926	0.308657	141.934												4.816	69.665	0.0946441	35.3947					75.799	0.237	1.22203	0.528746				6.971	82.604	0.112387	184.289
			118.053	0.114	1.1923	0.228131				8.028	0.541	0.0810804	1.08262												5.208	69.848	0.102348	35.4877					61.91	0.243	0.998115	0.542132				6.387	81.99	0.102971	182.919
			114.354	0.122	1.15494	0.24414				27.25	68.661	0.275217	137.401												7.57	114.698	0.148766	58.2747					68.906	0.451	1.1109	1.00618				4.59	73.109	0.0740001	163.106
			95.64	0.139	0.965935	0.27816				30.207	73.798	0.305082	147.681												6.21	102.464	0.122039	52.0589					88.49	0.254	1.42664	0.566673				2.696	36.809	0.043465	82.1208
			141.716	0.139	1.43129	0.27816				25.256	62.39	0.255078	124.852												2.739	43.426	0.0538269	22.0635					89.623	0.23	1.44491	0.513129				4.912	73.656	0.0791914	164.326
			122.464	0.371	1.23685	0.742427				31.971	0.152	0.322898	0.304175												5.417	71.742	0.106455	36.45					75.415	0.278	1.21584	0.620217				5.24	84.145	0.0844795	187.727
			118.955	0.147	1.20141	0.294169				12.963	0.047	0.130922	0.094054												3.236	58.022	0.0635939	29.4793					75.933	0.262	1.22419	0.584521				6.558	114.057	0.105728	254.461
			137.726	0.143	1.39099	0.286164				17.954	44.549	0.18133	89.1492												5.162	84.82	0.101444	43.0945					40.459	0.174	0.652281	0.388194				5.6	101.047	0.0902834	225.436
			115.271	0.136	1.1642	0.272156				37.804	0.046	0.381809	0.0920529												3.623	55.366	0.0711993	28.1298					78.864	0.329	1.27145	0.733998				3.861	61.018	0.0622472	136.131
			95.325	0.19	0.962754	0.380218				33.253	79.932	0.335845	159.956												5.557	110.002	0.109206	55.8888					89.96	0.199	1.45034	0.443968				4.794	71.539	0.077289	159.603
			97.121	0.207	0.980893	0.414238				18.216	0.686	0.183976	1.37279												4.419	79.277	0.0868423	40.2783					70.731	0.314	1.14033	0.700533				2.812	34.009	0.0453352	75.874
			113.788	0.161	1.14922	0.322185				12.891	0.055	0.130195	0.110063												5.128	91.386	0.100776	46.4305					45.458	0.385	0.732875	0.858934				6.285	94.434	0.101327	210.682
			117.161	0.133	1.18329	0.266153				22.846	9.713	0.230738	19.4372												4.333	71.087	0.0851522	36.1172					84.935	0.228	1.36933	0.508667				4.808	43.337	0.0775147	96.6847
			112.977	0.172	1.14103	0.344198				21.128	9.166	0.213386	18.3425												5.499	109.118	0.108066	55.4396					91.639	0.239	1.47741	0.533208				7.323	108.006	0.118062	240.961
			112.028	0.124	1.13145	0.248143				23.417	53.439	0.236505	106.939												4.391	77.05	0.086292	39.1468					70.847	0.316	1.1422	0.704995				4.314	53.453	0.0695505	119.253
										12.494	0.055	0.126186	0.110063												4.875	86.245	0.0958036	43.8185					5.652	0.883	0.0911217	1.96997				7.014	146.357	0.11308	326.522
										33.263	84.381	0.335946	168.859												4.476	63.021	0.0879625	32.0191					70.93	0.234	1.14354	0.522053				13.964	171.456	0.225128	382.518
										27.294	69.394	0.275661	138.868												6.659	116.209	0.130863	59.0424					89.868	0.245	1.44886	0.546594				31.752	0.047	0.511907	0.104857
										27.3	70.19	0.275722	140.461												12.91	1.624	0.253708	0.825106					74.632	0.271	1.20322	0.6046				5.947	104.82	0.0958777	233.853
										17.307	0.077	0.174796	0.154089												4.925	84.734	0.0967862	43.0508					72.163	0.311	1.16341	0.69384				21.681	0.244	0.349542	0.544363
										6.023	0.27	0.0608305	0.54031												3.317	46.966	0.0651858	23.862					77.412	0.186	1.24804	0.414965				4.471	60.746	0.0720816	135.524
										27.401	64.527	0.276742	129.128												4.784	74.13	0.0940153	37.6633					91.279	0.305	1.4716	0.680454				21.494	0.066	0.346527	0.147246
										37.51	0.303	0.37884	0.606348												27.703	0.337	0.54442	0.17122					77.644	0.29	1.25178	0.646989				5.592	73.771	0.0901544	164.583
										25.32	62.138	0.255724	124.347												27.482	0.23	0.540077	0.116856					89.232	0.196	1.4386	0.437275				27.39	0.074	0.441583	0.165094
										41.13	0.167	0.415401	0.334192												22.743	2.976	0.446946	1.51202					76.87	0.329	1.2393	0.733998				5.833	77.238	0.0940398	172.318
										40.361	102.714	0.407634	205.546												4.305	53.389	0.084602	27.1254					42.897	0.428	0.691587	0.954867				18.427	1.454	0.297081	3.24387
										17.051	36.806	0.17221	73.6543												26.688	0.489	0.524473	0.248446					56.168	0.277	0.905542	0.617986				6.051	104.952	0.0975544	234.148
										20.426	0.039	0.206297	0.0780448												3.853	68.191	0.0757192	34.6458					76.705	0.232	1.23664	0.517591				3.928	36.778	0.0633274	82.0516
										16.184	3.563	0.163454	7.1301												19.405	0.277	0.381348	0.140735					92.272	0.233	1.48761	0.519822				30.965	0.131	0.499219	0.292261
										43.205	105.057	0.436358	210.235												5.058	52.415	0.0993999	26.6305					92.082	0.267	1.48455	0.595676				5.608	99.206	0.0904124	221.328
										13.217	1.124	0.133488	2.24929												3.937	48.2	0.07737	24.489					49.132	0.311	0.792108	0.69384				18.887	0.322	0.304497	0.718381
										33.743	0.041	0.340794	0.0820471												3.765	68.654	0.0739899	34.8811					79.848	0.196	1.28731	0.437275				8.025	162.867	0.129379	363.356
										34.543	0.059	0.348874	0.118068												3.359	46.87	0.0660111	23.8133					82.04	0.26	1.32265	0.580059				6.446	74.413	0.103923	166.015
										42.432	0.143	0.428551	0.286164												7.451	9.03	0.146427	4.58788					36.688	0.578	0.591485	1.28952				33.51	0.142	0.540249	0.316802
										16.821	0.024	0.169887	0.0480276												7.632	9.492	0.149984	4.8226					82.742	0.26	1.33397	0.580059				30.959	0.927	0.499122	2.06813
										13.407	0.047	0.135407	0.094054												25.716	0.253	0.505371	0.128542					51.824	0.296	0.835508	0.660375				23.011	1.39	0.370984	3.10109
										36.027	0.066	0.363862	0.132076												3.703	62.326	0.0727714	31.666					74.568	0.321	1.20219	0.71615				10.222	101.556	0.164799	226.571
										22.298	0.248	0.225203	0.496285												23.728	0.537	0.466303	0.272834					69.25	0.479	1.11645	1.06865				7.614	154.549	0.122753	344.798
										20.247	44.2	0.204489	88.4508												5.284	42.763	0.103841	21.7266					75.685	0.302	1.2202	0.673761				18.233	3.301	0.293953	7.36452
										27.545	66.394	0.278196	132.864												4.536	66.974	0.0891416	34.0275					77.986	0.244	1.25729	0.544363				19.674	0.338	0.317185	0.754077
										19.739	44.875	0.199358	89.8016												5.118	68.547	0.100579	34.8267					59.903	0.392	0.965758	0.874551				6.799	110.118	0.109614	245.673
										40.192	0.208	0.405927	0.416239												5.096	78.977	0.100147	40.1259					78.028	0.266	1.25797	0.593445				5.564	71.102	0.089703	158.628
										19.311	48.137	0.195035	96.3293												4.722	29.726	0.0927969	15.1029					82.741	0.229	1.33395	0.510898				1.169	1.824	0.0188467	4.06934
										38.836	6.247	0.392232	12.5012												18.537	0.383	0.36429	0.194591					59.9	0.604	0.96571	1.34752				1.219	3.023	0.0196528	6.7443
										56.298	0.434	0.568593	0.868499												6.54	100.583	0.128524	51.1032					89.509	0.294	1.44307	0.655913				0.929	1.334	0.0149774	2.97615
										40.022	0.214	0.40421	0.428246												5.553	8.975	0.109128	4.55993					77.638	0.251	1.25168	0.55998				3.693	49.524	0.0595387	110.488
										35.96	1.952	0.363185	3.90624												2.695	33.932	0.0529622	17.2398					71.274	0.288	1.14908	0.642527				3.335	49.652	0.053767	110.773
										21.576	48.144	0.217911	96.3434												3.647	56.168	0.0716709	28.5373					64.622	0.214	1.04184	0.477433				4.89	89.016	0.0788368	198.594
										68.569	0.518	0.692526	1.0366												8.78	28.673	0.172545	14.5679					36.745	0.976	0.592404	2.17745				3.907	57.757	0.0629888	128.856
										12.505	0.215	0.126297	0.430247												32.93	0.355	0.647141	0.180365					69.876	0.58	1.12654	1.29398				4.422	73.436	0.0712916	163.836
										30.501	0.043	0.308051	0.0860494												3.071	36.187	0.0603514	18.3855					68.826	0.229	1.10962	0.510898				6.917	119.155	0.111516	265.834
										18.125	43.583	0.183057	87.2161												2.692	37.633	0.0529032	19.1202					85.938	0.256	1.3855	0.571135				3.923	82.537	0.0632467	184.14
										31.02	0.364	0.313293	0.728419												6.376	111.755	0.125301	56.7794					77.497	1.556	1.24941	3.47143				4.339	62.819	0.0699535	140.149
										24.553	61.732	0.247978	123.535												3.163	47.234	0.0621594	23.9982					55.204	0.365	0.890001	0.814314				6.596	89.672	0.106341	200.058
										21.946	52.534	0.221648	105.128												5.934	96.726	0.116615	49.1436					84.222	0.23	1.35783	0.513129				4.681	82.638	0.0754672	184.365
										39.445	1.778	0.398383	3.55804												2.623	39.08	0.0515473	19.8554					71.598	0.294	1.15431	0.655913				5.11	95.755	0.0823836	213.629
										48.408	122.582	0.488906	245.305												3.324	48.562	0.0653233	24.6729					39.563	0.32	0.637836	0.713919				4.299	70.126	0.0693086	156.451
										26.225	65.222	0.264865	130.519												3.967	54.703	0.0779596	27.793					44.79	0.278	0.722106	0.620217				2.854	52.032	0.0460123	116.083
										21.712	49.364	0.219285	98.7848												6.306	63.219	0.123926	32.1197					78.659	0.259	1.26814	0.577828				5.068	94.087	0.0817065	209.908
										45.976	0.791	0.464344	1.58291												5.181	99.742	0.101817	50.676					80.125	0.661	1.29178	1.47469				5.577	78.709	0.0899126	175.6
										38.471	92.023	0.388546	184.152												4.431	56.773	0.0870781	28.8447					104.156	0.535	1.67921	1.19358				22.474	0.486	0.362327	1.08426
										25.895	0.225	0.261532	0.450259												4.188	54.327	0.0823027	27.6019					48.983	0.214	0.789706	0.477433				8.685	168.418	0.14002	375.74
										21.238	47.69	0.214497	95.4348												4.815	80.924	0.0946245	41.1151					71.495	0.291	1.15264	0.64922				23.012	0.041	0.371	0.0914709
										26.862	67.407	0.271298	134.892												3.923	51.323	0.0770949	26.0757					70.361	0.22	1.13436	0.490819				10.324	0.917	0.166444	2.04582
										29.471	0.368	0.297648	0.736423												4.324	61.45	0.0849754	31.2209					36.591	0.22	0.589921	0.490819				9.507	3.886	0.153272	8.66966
										48.685	0.059	0.491704	0.118068												4.347	56.251	0.0854273	28.5795					85.752	0.311	1.3825	0.69384				28.423	0.059	0.458237	0.131629
										32.097	0.12	0.32417	0.240138												7.895	98.267	0.155153	49.9266					63.448	0.247	1.02291	0.551056				6.838	84.879	0.110242	189.365
										30.172	0.042	0.304728	0.0840483												5.354	73.206	0.105217	37.1938					68.04	0.209	1.09694	0.466278				28.897	0.035	0.465878	0.0780849
										29.395	0.234	0.296881	0.468269												5.231	81.262	0.1028	41.2868					84.726	0.24	1.36596	0.535439				23.27	0.026	0.37516	0.0580059
										23.829	0.166	0.240666	0.332191												6.174	79.088	0.121332	40.1823					33.083	0.237	0.533365	0.528746				28.792	0.778	0.464186	1.73572
										14.02	0.681	0.141598	1.36278												36.165	0.083	0.710715	0.0421698					74.197	0.225	1.19621	0.501974				31.238	0.612	0.50362	1.36537
										37.075	0.218	0.374446	0.436251												5.865	89.638	0.115259	45.5424					31.984	0.25	0.515647	0.557749				21.059	0.101	0.339514	0.225331
										16.307	36.525	0.164696	73.092												4.124	58.027	0.0810449	29.4818					45.394	0.228	0.731844	0.508667				13.587	2.986	0.21905	6.66176
										22.323	52.933	0.225456	105.927												5.906	18.994	0.116065	9.65029					45.879	0.283	0.739663	0.631372				27.189	0.049	0.438342	0.109319
										28.07	0.06	0.283499	0.120069												3.181	50.593	0.0625131	25.7048					75.651	0.334	1.21965	0.745153				12.367	0.119	0.199381	0.265489
										25.502	63.329	0.257563	126.731												6.868	108.487	0.13497	55.119					38.346	2.526	0.618216	5.6355				19.476	0.031	0.313993	0.0691609
										27.586	68.913	0.27861	137.905												8.229	37.315	0.161717	18.9586					57.774	0.361	0.931434	0.80539				28.702	0.133	0.462735	0.296723
										18.637	45.373	0.188228	90.7982												4.837	69.635	0.0950568	35.3795					85.739	0.63	1.38229	1.40553				29.381	0.038	0.473682	0.0847779
										21.617	52.398	0.218325	104.856												5.671	48.573	0.111447	24.6785					69.543	0.341	1.12117	0.76077				32.917	0.033	0.530689	0.0736229
										24.528	0.29	0.247725	0.580333												5.61	61.473	0.110248	31.2326					75.223	0.494	1.21275	1.10211				17.486	0.082	0.28191	0.182942
										51.271	0.134	0.517822	0.268154												4.866	88.685	0.0956267	45.0582					76.598	0.283	1.23492	0.631372				15.829	0.05	0.255196	0.11155
										26.152	60.87	0.264127	121.81												5.415	78.057	0.106416	39.6584					59.659	0.431	0.961824	0.96156				26.939	0.029	0.434312	0.0646989
										32.092	79.319	0.32412	158.729												3.183	51.789	0.0625524	26.3125					53.483	0.303	0.862255	0.675992				26.416	0.087	0.42588	0.194097
										18.084	43.525	0.182643	87.1												5.27	91.699	0.103566	46.5895					36.282	0.335	0.58494	0.747384				27.329	0.053	0.440599	0.118243
										13.015	30.303	0.131448	60.6408												2.966	37.656	0.0582879	19.1319					14.038	0.242	0.226321	0.539901				15.656	0.052	0.252407	0.116012
										28.02	71.239	0.282994	142.56												2.467	27.737	0.0484815	14.0923					59.312	0.224	0.95623	0.499743				25.984	0.049	0.418915	0.109319
										22.938	55.577	0.231667	111.218												3.481	56.54	0.0684087	28.7263					67.935	0.241	1.09525	0.53767				6.113	69.679	0.098554	155.454
										66.366	0.173	0.670277	0.346199												7.147	104.279	0.140453	52.9811					41.179	0.291	0.663889	0.64922				37.053	0.035	0.59737	0.0780849
										33.446	0.341	0.337795	0.682392												3.317	46.833	0.0651858	23.7945					84.94	0.233	1.36941	0.519822				10.377	0.083	0.167298	0.185173
										38.699	0.09	0.390848	0.180103												3.39	40.651	0.0666204	20.6536					30	0.377	0.483661	0.841086				17.862	0.053	0.287972	0.118243
										34.743	0.674	0.350894	1.34877												2.867	35.634	0.0563424	18.1046					58.283	0.324	0.939641	0.722843				26.638	0.031	0.429459	0.0691609
										29.493	75.696	0.29787	151.479												3.5	56.536	0.0687821	28.7243					85.351	0.247	1.37603	0.551056				26.656	0.042	0.429749	0.0937019
										63.517	167.029	0.641503	334.25												3.365	48.554	0.0661291	24.6688					44.714	0.384	0.720881	0.856703				24.621	0.213	0.396941	0.475202
										26.857	64.941	0.271248	129.957												6.165	81.248	0.121155	41.2797					44.627	1.421	0.719478	3.17025				21.88	0.119	0.35275	0.265489
										37.408	0.216	0.37781	0.432248												4.016	57.659	0.0789225	29.2948					29.538	0.242	0.476213	0.539901				15.406	0.038	0.248376	0.0847779
										15.184	30.666	0.153354	61.3673												5.136	59.215	0.100933	30.0854					47.712	0.453	0.769215	1.01064				33.119	0.05	0.533946	0.11155
										16.212	32.687	0.163736	65.4116												2.744	27.295	0.0539252	13.8678					55.66	0.214	0.897352	0.477433				34.506	0.037	0.556307	0.0825469
										44.302	0.054	0.447437	0.108062												5.103	81.959	0.100284	41.6409					50.443	0.357	0.813244	0.796466				28.028	0.038	0.451868	0.0847779
										38.612	96.351	0.38997	192.813												5.699	83.494	0.111997	42.4208					84.757	0.331	1.36646	0.73846				31.48	0.054	0.507522	0.120474
										17.203	36.039	0.173745	72.1194												4.33	70.611	0.0850933	35.8754					46.033	0.376	0.742146	0.838855				25.151	0.035	0.405485	0.0780849
										28.477	71.114	0.287609	142.31												2.717	36.305	0.0533945	18.4455					70.44	0.34	1.13564	0.758539				31.232	0.289	0.503523	0.644758
										3.633	0.077	0.0366922	0.154089												5.786	63.238	0.113707	32.1294					21.395	2.728	0.344931	6.08616				28.024	0.169	0.451804	0.377039
										20.468	49.139	0.206721	98.3345												4.914	42.021	0.09657	21.3496					42.156	0.345	0.679641	0.769694				16.391	0.099	0.264256	0.220869
										17.789	0.953	0.179664	1.9071												5.953	72.732	0.116988	36.953					49.472	0.261	0.797589	0.58229				20.729	0.042	0.334194	0.0937019
										15.322	0.077	0.154748	0.154089												4.753	77.843	0.0934061	39.5497					50.985	0.27	0.821982	0.602369				19.564	0.039	0.315411	0.0870089
										9.731	0.305	0.0982802	0.610351												3.562	34.665	0.0700005	17.6123					83.977	0.279	1.35388	0.622448				44.078	0.042	0.710627	0.0937019
										17.24	37.727	0.174119	75.4974												4.51	75.665	0.0886306	38.4431					66.786	0.373	1.07673	0.832162				22.17	0.032	0.357426	0.0713919
										38.057	0.191	0.384364	0.38222												6.342	82.08	0.124633	41.7024					33.015	0.307	0.532269	0.684916				47.013	0.033	0.757945	0.0736229
										15.111	35.975	0.152617	71.9914												5.018	68.412	0.0986139	34.7581					20.205	0.736	0.325746	1.64201				41.382	0.032	0.667162	0.0713919
										18.323	41.163	0.185057	82.3733												5.148	66.54	0.101169	33.807					36.367	0.414	0.58631	0.923633				26.439	0.025	0.42625	0.0557749
										23.093	57.239	0.233232	114.544												4.234	52.944	0.0832067	26.8993					73.019	0.407	1.17721	0.908016				19.588	0.039	0.315798	0.0870089
										18.583	45.025	0.187683	90.1018												6.584	13.681	0.129389	6.95091					40.53	0.425	0.653426	0.948174				24.254	0.032	0.391024	0.0713919
										21.725	0.079	0.219416	0.158091												4.72	72.48	0.0927576	36.8249					42.019	1.725	0.677432	3.84847				28.924	0.028	0.466314	0.0624679
										35.433	85.217	0.357863	170.532												2.75	44.381	0.0540431	22.5487					54.878	0.271	0.884745	0.6046				20.157	0.029	0.324972	0.0646989
										12.192	0.512	0.123136	1.02459												4.202	50.326	0.0825778	25.5692					75.153	0.287	1.21162	0.640296				47.797	0.04	0.770585	0.0892399
										22.173	44.265	0.223941	88.5809												20.366	0.102	0.400233	0.0518232					41.738	3.903	0.672902	8.70758				28.853	0.078	0.465169	0.174018
										30.16	0.667	0.304607	1.33477												4.038	69.508	0.0793549	35.315					20.644	0.64	0.332823	1.42784				34.562	0.049	0.55721	0.109319
										51.843	132.713	0.523599	265.579												3.624	38.933	0.0712189	19.7807					37.554	0.233	0.605447	0.519822				33.001	0.078	0.532043	0.174018
										34.563	82.288	0.349076	164.671												4.735	46.39	0.0930523	23.5694					66.761	0.482	1.07632	1.07534				34.462	0.043	0.555598	0.0959329
										28.053	66.379	0.283327	132.834												7.332	0.048	0.144089	0.0243874					45.663	0.537	0.73618	1.19805				19.394	0.027	0.312671	0.0602369
										16.051	35.319	0.16211	70.6786												5.161	72.528	0.101424	36.8493					26.229	0.523	0.422865	1.16681				29.968	0.222	0.483145	0.495281
										47.685	0.049	0.481604	0.0980563												8.908	0.056	0.17506	0.0284519					37.575	0.772	0.605785	1.72233				39.556	0.045	0.637723	0.100395
										47.372	120.643	0.478443	241.425												6.325	88.629	0.124299	45.0298					45.045	0.24	0.726217	0.535439				27.918	0.157	0.450095	0.350267
										39.622	0.159	0.40017	0.318183												4.879	0.051	0.0958822	0.0259116					48.995	0.348	0.789899	0.776387				37.063	0.064	0.597531	0.142784
										41.484	0.243	0.418976	0.486279												4.184	0.034	0.0822241	0.0172744					20.113	0.578	0.324262	1.28952				22.359	0.018	0.360473	0.040158
										29.642	63.751	0.299375	127.575												4.816	74.808	0.0946441	38.0077					48.236	3.183	0.777662	7.10126				45.006	0.021	0.725588	0.0468509
										28.549	0.283	0.288336	0.566325												5.05	74.282	0.0992427	37.7405					50.439	1.05	0.813179	2.34255				40.346	0.051	0.65046	0.113781
										39.065	100.041	0.394545	200.197												18.268	0.044	0.359003	0.0223551					41.623	0.498	0.671047	1.11104				23.97	0.058	0.386445	0.129398
										3.644	0.709	0.0368033	1.41882												3.542	54.373	0.0696075	27.6253					27.221	0.26	0.438858	0.580059				30.009	0.111	0.483806	0.247641
										41.613	0.13	0.420279	0.260149												2.367	26.051	0.0465163	13.2357					53.421	0.608	0.861255	1.35645				5.243	78.407	0.0845278	174.926
										17.054	0.186	0.17224	0.372214												5.012	66.97	0.0984959	34.0255					46.786	0.3	0.754286	0.669299				5.094	58.394	0.0821256	130.277
										22.674	58.003	0.229001	116.073												3.263	47.977	0.0641246	24.3757					56.364	0.87	0.908702	1.94097				4.689	56.348	0.0755962	125.712
										23.123	56.026	0.233535	112.116												4.22	59.458	0.0829315	30.2088					56.451	0.254	0.910105	0.566673				24.992	0.924	0.402922	2.06144
										25.697	59.578	0.259532	119.225												6.256	0.062	0.122943	0.0315004					55.26	0.485	0.890904	1.08203				18.186	1.157	0.293195	2.58126
										18.253	45.267	0.18435	90.586												3.903	56.998	0.0767018	28.959					42.154	0.437	0.679608	0.974946				4.557	46.618	0.0734681	104.005
										20.004	2.09	0.202034	4.1824												16.458	0.036	0.323433	0.0182905					64.001	1.203	1.03183	2.68389				10.372	132.86	0.167218	296.41
										1.559	0.369	0.0157454	0.738424												4.216	57.389	0.0828529	29.1577					61.069	1.053	0.984557	2.34924				8.857	113.178	0.142793	252.5
										11.684	27.608	0.118005	55.2477												5.522	0.303	0.108518	0.153945					25.418	1.36	0.40979	3.03416				5.607	71.585	0.0903963	159.706
										3.971	8.391	0.0401059	16.7916												3.405	39.221	0.0669151	19.927					42.519	2.032	0.685493	4.53339				5.939	53.905	0.0957488	120.262
										10.151	25.531	0.102522	51.0914												4.356	4.342	0.0856042	2.20604					53.561	0.3	0.863512	0.669299				6.125	73.048	0.0987475	162.97
										6.868	14.851	0.0693648	29.7191												16.397	0.054	0.322234	0.0274358					46.53	0.995	0.750158	2.21984				25.989	0.05	0.418996	0.11155
										32.994	87.878	0.33323	175.857												6.319	68.786	0.124181	34.9481					54.968	0.266	0.886196	0.593445				5.482	75.761	0.088381	169.023
										11.059	24.083	0.111693	48.1937												7.036	102.19	0.138272	51.9197					74.654	10.68	1.20357	23.8271				6.463	102.575	0.104197	228.845
										9.715	23.216	0.0981186	46.4587												7.773	0.037	0.152755	0.0187986					41.911	0.559	0.675691	1.24713				12.527	171.824	0.201961	383.339
										8.752	8.717	0.0883926	17.444												22.55	0.221	0.443153	0.112284					59.687	0.808	0.962276	1.80265				3.4	41.873	0.0548149	93.4185
										35.21	90.206	0.35561	180.516												3.575	50.798	0.070256	25.809					48.682	0.305	0.784853	0.680454				7.282	93.868	0.117401	209.419
										12.858	28.634	0.129862	57.3009												14.807	0.801	0.290988	0.406964					36.957	1.08	0.595822	2.40948				5.684	108.412	0.0916376	241.867
										8.698	0.16	0.0878472	0.320184												3.333	43.567	0.0655002	22.1351					50.557	0.501	0.815082	1.11773				26.854	1.138	0.432941	2.53887
										12.703	0.541	0.128297	1.08262												5.295	69.049	0.104057	35.0818					57.879	7.259	0.933127	16.1948				6.326	102.497	0.101988	228.671
										13.029	31.569	0.131589	63.1743												6.697	92.581	0.13161	47.0377					51.841	1.124	0.835782	2.50764				4.583	54.062	0.0738873	120.612
										16.587	39.294	0.167524	78.6332												4.411	0.047	0.0866851	0.0238793					68.634	0.977	1.10652	2.17968				8.881	90.491	0.14318	201.885
										13.303	34.409	0.134356	68.8576												5.418	83.853	0.106475	42.6032					61.356	0.638	0.989184	1.42338				6.38	105.448	0.102859	235.254
										21.048	53.478	0.212579	107.017												9.161	0.063	0.180032	0.0320084					42.279	0.509	0.681624	1.13558				5.735	63.092	0.0924599	140.758
										37.1	97.839	0.374699	195.79												4.565	60.99	0.0897115	30.9872					59.205	0.735	0.954505	1.63978				7.669	104.347	0.12364	232.798
										22.707	60.044	0.229334	120.157												9.752	0.061	0.191647	0.0309923					45.485	0.594	0.733311	1.32521				34.288	1.522	0.552792	3.39558
										15.353	36.263	0.155061	72.5677												4.341	66.972	0.0853094	34.0265					78.358	0.809	1.26329	1.80488				4.984	35.277	0.0803522	78.7029
										10.238	24.511	0.103401	49.0502												9.323	2.366	0.183216	1.20209					35.736	1.404	0.576137	3.13232				7.003	98.645	0.112903	220.077
										23.853	62.115	0.240908	124.301												4.197	0.079	0.0824795	0.0401376					41.962	0.346	0.676513	0.771925				4.725	62.473	0.0761766	139.377
										24.858	65.206	0.251058	130.487												18.004	0.06	0.353815	0.0304842					51.074	0.55	0.823417	1.22705				5.878	71.913	0.0947653	160.438
										11.191	22.32	0.113026	44.6657												4.22	0.05	0.0829315	0.0254035					88.908	0.289	1.43338	0.644758				5.102	52.833	0.0822546	117.87
										14.138	31.161	0.14279	62.3578												14.398	0.05	0.28295	0.0254035					88.265	0.346	1.42301	0.771925				2.999	44.765	0.04835	99.8706
										33.27	0.271	0.336017	0.542312												5.23	94.035	0.10278	47.7764					73.495	2.607	1.18489	5.81621				6.599	90.293	0.106389	201.443
										21.949	55.68	0.221678	111.424												13.462	0.07	0.264556	0.0355649					29.715	0.288	0.479066	0.642527				20.948	5.224	0.337724	11.6547
										9.1	17.75	0.0919073	35.5204												4.943	86.567	0.09714	43.9821					45.853	0.244	0.739244	0.544363				4.93	82.735	0.0794816	184.582
										46.246	0.202	0.467071	0.404232												3.97	59.391	0.0780185	30.1748					31.192	0.436	0.502879	0.972715				12.526	188.744	0.201945	421.087
										24.444	0.099	0.246877	0.198114												4.832	0.098	0.0949586	0.0497909					44.346	0.444	0.714948	0.990563				8.528	92.701	0.137489	206.816
										21.974	54.522	0.221931	109.107												7.347	0.141	0.144383	0.0716379					52.865	12.945	0.852291	28.8803				6.8	90.7	0.10963	202.351
										16.415	38.885	0.165787	77.8147												6.47	0.218	0.127149	0.110759					77.34	0.532	1.24688	1.18689				13.003	196.186	0.209635	437.69
										14.682	35.741	0.148284	71.5231												5.089	72.909	0.100009	37.0429					43.836	0.457	0.706726	1.01957				29.383	0.035	0.473714	0.0780849
										19.358	48.394	0.19551	96.8436												13.218	0.281	0.25976	0.142768					42.5	0.407	0.685186	0.908016				7.743	102.575	0.124833	228.845
										18.165	42.881	0.183461	85.8113												15.708	0.185	0.308694	0.093993					43.364	0.514	0.699116	1.14673				31.123	1.273	0.501766	2.84006
										17.35	41.54	0.17523	83.1278												10.216	0.291	0.200765	0.147848					35.594	0.262	0.573848	0.584521				18.456	0.134	0.297548	0.298954
										12.074	29.878	0.121944	59.7904												9.319	0.436	0.183137	0.221519					58.988	0.603	0.951007	1.34529				13.096	14.081	0.211134	31.4147
										16.378	41.29	0.165413	82.6275												1.246	27.541	0.0244864	13.9928					52.397	0.196	0.844746	0.437275				30.523	1.639	0.492093	3.6566
										44.272	0.132	0.447134	0.264152												0.574	0.24	0.0112803	0.121937					26.58	0.271	0.428524	0.6046				9.96	141.66	0.160575	316.043
										22.073	53.878	0.222931	107.818												2.421	43.355	0.0475775	22.0274					25.446	0.25	0.410241	0.557749				13.236	0.563	0.213391	1.25605
										38.519	1.001	0.38903	2.00315												2.415	42.55	0.0474596	21.6184					49.818	0.292	0.803168	0.651451				5.012	80.603	0.0808036	179.825
										19.137	47.481	0.193278	95.0166												6.716	0.206	0.131983	0.104662					41.044	0.595	0.661713	1.32744				21.475	0.265	0.346221	0.591214
										34.126	1.962	0.344662	3.92626												2.515	29.634	0.0494248	15.0562					38.204	0.337	0.615926	0.751846				6.93	96.038	0.111726	214.261
										21.189	49.596	0.214003	99.249												1.385	14.055	0.0272181	7.14093					47.618	0.211	0.767699	0.47074				4.658	67.528	0.0750964	150.655
										23.849	54.656	0.240868	109.375												2.172	32.76	0.0426842	16.6444					28.807	0.277	0.464427	0.617986				23.363	2.482	0.376659	5.53734
										15.339	34.998	0.154919	70.0362												8.317	0.07	0.163446	0.0355649					45.318	0.519	0.730618	1.15789				4.579	66.033	0.0738228	147.319
										25.321	51.323	0.255735	102.705												1.942	22.366	0.0381642	11.3635					48.759	0.357	0.786094	0.796466				8.585	117.549	0.138408	262.252
										20.774	48.119	0.209811	96.2933												14.712	0.173	0.289121	0.0878962					55.865	0.237	0.900657	0.528746				3.587	43.411	0.0578297	96.8498
										29.332	0.036	0.296244	0.0720414												13.832	0.299	0.271827	0.151913					42.113	2.122	0.678947	4.73418				28.934	0.334	0.466475	0.745153
										26.765	0.037	0.270319	0.0740425												4.678	73.064	0.0919322	37.1217					35.748	0.177	0.576331	0.394887				20.844	0.222	0.336048	0.495281
										14.779	31.068	0.149263	62.1717												3.207	43.284	0.063024	21.9913					42.814	0.195	0.690249	0.435044				7.053	94.347	0.113709	210.488
										47.108	0.246	0.475777	0.492283												5.149	0.074	0.101188	0.0375972					34.661	0.257	0.558806	0.573366				6.42	83.236	0.103503	185.699
										26.781	0.048	0.27048	0.0960552												11.506	0.285	0.226116	0.1448					53.581	0.435	0.863835	0.970484				5.836	96.917	0.0940882	216.222
										27.206	0.023	0.274772	0.0460264												14.84	0.86	0.291636	0.436941					37.446	0.223	0.603706	0.497512				6.714	89.296	0.108243	199.219
										43.894	0.026	0.443316	0.0520299												14.66	0.557	0.288099	0.282995					38.365	0.369	0.618522	0.823238				21.805	0.791	0.351541	1.76472
										23.975	0.575	0.24214	1.15066												9.557	0.328	0.187814	0.166647					26.073	0.249	0.42035	0.555518				5.06	77.06	0.0815775	171.921
										20.295	47.322	0.204973	94.6984												3.942	0.149	0.0774683	0.0757025					53.319	3.671	0.859611	8.18999				6.324	101.955	0.101956	227.461
										27.283	68.164	0.27555	136.406												4.503	0.352	0.0884931	0.178841					43.522	1.749	0.701663	3.90201				5.526	83.563	0.0890904	186.429
										27.608	68.689	0.278833	137.457												13.345	0.306	0.262256	0.15547					27.127	0.282	0.437342	0.629141				7.146	88.543	0.115208	197.539
										21.402	0.052	0.216154	0.10406												7.81	0.136	0.153482	0.0690976					45.449	1.856	0.73273	4.14073				4.187	42.925	0.067503	95.7656
										33.482	74.991	0.338158	150.068												11.733	0.056	0.230577	0.0284519					39.437	0.207	0.635805	0.461816				5.87	83.874	0.0946363	187.123
										31.792	0.375	0.32109	0.750431												3.283	0.088	0.0645176	0.0447102					35.824	0.26	0.577556	0.580059				7.189	85.847	0.115901	191.524
										7.387	0.046	0.0746065	0.0920529												13.155	0.352	0.258522	0.178841					38.219	0.321	0.616168	0.71615				6.849	132.78	0.11042	296.232
										8.67	0.195	0.0875644	0.390224												8.413	0.337	0.165332	0.17122					36.592	0.331	0.589938	0.73846				6.225	85.788	0.10036	191.393
										24.614	59.194	0.248594	118.456												9.726	0.39	0.191136	0.198147					45.384	0.8	0.731682	1.7848				7.333	73.074	0.118223	163.028
										30.613	56.761	0.309182	113.587												12.736	0.359	0.250288	0.182397					32.959	1.677	0.531366	3.74138				6.038	62.083	0.0973448	138.507
										21.974	52.322	0.221931	104.704												4.802	0.116	0.094369	0.0589362					40.715	0.23	0.656409	0.513129				7.588	84.521	0.122334	188.566
										36.11	0.352	0.3647	0.704405												8.017	0.084	0.15755	0.0426779					37.97	1.166	0.612154	2.60134				5.358	88.101	0.0863819	196.553
										12.741	27.775	0.12868	55.5819												7.967	0.494	0.156568	0.250987					34.485	0.3	0.555968	0.669299				7.276	114.36	0.117304	255.137
										34.043	0.83	0.343824	1.66095												3.914	0.093	0.076918	0.0472505					33.716	2.209	0.543571	4.92827				6.654	66.576	0.107276	148.531
										45.385	0.061	0.458375	0.12207												6.848	0.048	0.134577	0.0243874					37.3	0.3	0.601352	0.669299				5.347	71.935	0.0862045	160.487
										14.55	35.287	0.146951	70.6146												4.844	0.119	0.0951944	0.0604604					48.744	0.291	0.785852	0.64922				12.938	152.064	0.208587	339.254
										24.928	0.051	0.251765	0.102059												5.348	0.021	0.105099	0.0106695					34.802	0.296	0.561079	0.660375				3.913	55.596	0.0630855	124.035
										22.824	0.058	0.230516	0.116067												3.663	0.132	0.0719854	0.0670653					52.146	0.327	0.8407	0.729536				6.882	104.923	0.110952	234.083
										22.804	0.477	0.230314	0.954548												3.104	0.044	0.0609999	0.0223551					43.892	0.268	0.707628	0.597907				8.198	109.149	0.132168	243.511
										6.738	13.063	0.0680518	26.141												4.491	0.099	0.0882572	0.050299					44.076	4.094	0.710595	9.1337				7.683	124.811	0.123866	278.453
										43.238	0.494	0.436691	0.988568												9.886	0.055	0.19428	0.0279439					44.966	3.117	0.724943	6.95402				5.375	64.021	0.0866559	142.831
										27.173	65.482	0.274439	131.039												7.59	0.055	0.149159	0.0279439					38.82	2.661	0.625857	5.93668				6.156	90.748	0.0992472	202.459
										9.62	0.107	0.0971591	0.214123												10.866	0.217	0.213539	0.110251					34.923	0.323	0.56303	0.720612				6.438	91.198	0.103794	203.462
										38.475	0.11	0.388586	0.220126												2.181	0.177	0.0428611	0.0899285					34.245	0.363	0.552099	0.809852				7.67	117.814	0.123656	262.843
										23.301	54.184	0.235333	108.43												7.531	0.058	0.147999	0.0294681					34.377	0.315	0.554227	0.702764				5.85	84.654	0.0943139	188.863
										25.296	60.17	0.255482	120.409												8.314	0.328	0.163387	0.166647					38.685	0.295	0.623681	0.658144				7.604	120.857	0.122592	269.632
										24.317	57.763	0.245594	115.592												15.026	0.664	0.295291	0.337359					34.88	0.264	0.562337	0.588983				5.062	74.641	0.0816097	166.524
										53.407	0.033	0.539395	0.0660379												10.558	0.137	0.207486	0.0696056					70.821	10.556	1.14178	23.5504				6.23	95.318	0.10044	212.654
										28.657	71.158	0.289427	142.398												3.945	0.056	0.0775272	0.0284519					38.321	1.132	0.617813	2.52549				6.625	102.743	0.106808	229.219
										32.487	78.196	0.328109	156.482												11.465	0.134	0.22531	0.0680814					39.515	1.734	0.637062	3.86855				10.777	182.247	0.173747	406.593
										22.75	55.339	0.229768	110.742												2.617	0.102	0.0514293	0.0518232					39.661	2.483	0.639416	5.53957				5.716	86.223	0.0921536	192.363
										16.593	25.007	0.167584	50.0428												8.246	0.036	0.162051	0.0182905					41.915	0.281	0.675755	0.62691				5.734	86.858	0.0924437	193.78
										30.447	72.962	0.307506	146.008												2.898	0.536	0.0569516	0.272326					45.869	0.203	0.739502	0.452892				6.168	76.892	0.0994407	171.546
										27.966	69.099	0.282448	138.277												2.56	0.119	0.0503092	0.0604604					51.098	0.841	0.823804	1.87627				5.126	57.32	0.0826416	127.881
										41.335	0.359	0.417471	0.718413												2.44	0.067	0.0479509	0.0340407					27.554	0.823	0.444227	1.83611				7.819	122.593	0.126058	273.505
										54.824	126.473	0.553706	253.091												1.687	25.226	0.033153	12.8166					39.752	1.27	0.640883	2.83337				8.9	126.785	0.143486	282.857
										32.394	0.514	0.32717	1.02859												5.173	0.052	0.10166	0.0264197					29.056	0.634	0.468442	1.41445				9.747	117.438	0.157141	262.004
										32.663	77.312	0.329887	154.713												5.052	0.069	0.099282	0.0350569					37.349	3.165	0.602142	7.06111				8.396	135.988	0.135361	303.389
										32.516	0.424	0.328402	0.848488												11.428	0.067	0.224583	0.0340407					40.269	0.507	0.649218	1.13112				7.466	116.493	0.120367	259.896
										30.787	71.833	0.31094	143.749												5.25	0.033	0.103173	0.0167663					53.164	1.011	0.857112	2.25554				4.61	73.396	0.0743226	163.746
										16.287	34.511	0.164494	69.0617												4.376	0.075	0.0859973	0.0381053					26.075	1.014	0.420382	2.26223				6.202	82.4	0.0999889	183.834
																									6.917	0.043	0.135933	0.021847					33.107	0.917	0.533752	2.04582				4.241	60.752	0.0683736	135.538
																									3.381	0.044	0.0664435	0.0223551					35.809	0.331	0.577314	0.73846				5.11	68.456	0.0823836	152.725
																									6.136	0.067	0.120585	0.0340407					40.382	0.434	0.65104	0.968253				6.816	74.681	0.109888	166.613
																									3.992	0.062	0.0784509	0.0315004					33.607	0.305	0.541813	0.680454				6.669	82.459	0.107518	183.966
																									3.338	0.053	0.0655985	0.0269277					48.828	0.334	0.787207	0.745153				7.648	122.058	0.123301	272.311
																									2.34	35.263	0.0459857	17.9161					32.986	0.671	0.531801	1.497				7.201	111.97	0.116095	249.805
																									9.008	0.042	0.177025	0.021339					47.735	0.629	0.769585	1.4033				18.05	0.062	0.291003	0.138322
																									5.806	0.057	0.1141	0.02896					30.036	0.222	0.484241	0.495281				2.285	33.357	0.0368389	74.4194
																									6.97	0.047	0.136975	0.0238793					49.578	0.215	0.799298	0.479664				17.859	0.06	0.287923	0.13386
																									2.281	0.081	0.0448263	0.0411537					51.156	0.321	0.824739	0.71615				2.419	27.471	0.0389992	61.2877
																									8.944	0.038	0.175768	0.0193067					55.565	3.833	0.895821	8.55141				19.273	0.168	0.31072	0.374808
																									1.906	34.483	0.0374568	17.5198					55.242	0.455	0.890613	1.0151				22.385	0.284	0.360892	0.633603
																									8.335	0.03	0.1638	0.0152421					43.023	1.227	0.693618	2.73743				19.65	0.093	0.316798	0.207483
																									3.514	51.78	0.0690572	26.3079					45.099	0.332	0.727088	0.740691				20.558	0.075	0.331437	0.167325
																									7.991	0.107	0.157039	0.0543635					39.255	0.457	0.63287	1.01957				27.287	0.179	0.439922	0.399349
																									10.346	0.038	0.20332	0.0193067					33.097	0.204	0.533591	0.455123				20.126	0.094	0.324472	0.209714
																									3.59	0.065	0.0705508	0.0330246					38.345	0.98	0.618199	2.18638				2.133	33.105	0.0343883	73.8572
																									3.475	0.039	0.0682908	0.0198147					44.348	2.195	0.71498	4.89704				2.617	32.029	0.0421914	71.4566
																									3.998	19.643	0.0785688	9.98003					56.051	3.384	0.903656	7.54969				21.48	0.1	0.346301	0.2231
																									4.997	0.038	0.0982012	0.0193067					49.021	1.725	0.790318	3.84847				19.885	0.561	0.320587	1.25159
																									3.607	0.033	0.0708848	0.0167663					51.537	0.359	0.830881	0.800928				5.862	94.222	0.0945074	210.209
																									2.698	45.581	0.0530212	23.1584					37.534	0.264	0.605124	0.588983				3.532	58.931	0.056943	131.475
																									1.747	26.548	0.0343321	13.4883					34.631	0.245	0.558322	0.546594				3.574	47.529	0.0576202	106.037
																									3.026	31.863	0.059467	16.1886					51.219	0.796	0.825755	1.77587				17.704	0.035	0.285425	0.0780849
																									2.996	47.92	0.0588775	24.3467					40.792	0.548	0.65765	1.22259				2.38	38.872	0.0383704	86.7233
																									4.82	81.752	0.0947228	41.5358					50.721	0.583	0.817726	1.30067				2.887	42.7	0.0465443	95.2636
																									3.567	61.516	0.0700988	31.2545					51.445	2.805	0.829398	6.25795				19.923	0.092	0.321199	0.205252
																									3.532	40.48	0.0694109	20.5667					28.248	0.448	0.455415	0.999487				5.375	64.544	0.0866559	143.997
																									2.166	25.228	0.0425663	12.8176					45.042	0.991	0.726169	2.21092				21.252	0.051	0.342625	0.113781
																									2.353	24.184	0.0462412	12.2872					45.382	1.331	0.73165	2.96946				4.442	1.349	0.0716141	3.00962
																									2.873	30.066	0.0564603	15.2756					35.04	0.491	0.564916	1.09542				5.839	67.793	0.0941366	151.246
																									2.133	42.534	0.0419178	21.6103					47.704	0.728	0.769086	1.62417				6.247	37.019	0.100714	82.5893
																									2.348	29.394	0.046143	14.9342					57.273	0.53	0.923357	1.18243				5.229	61.423	0.0843021	137.035
																									2.395	43.842	0.0470666	22.2748					50.203	0.872	0.809375	1.94543				5.014	59.366	0.0808359	132.445
																									3.25	22.827	0.0638691	11.5977					18.029	0.673	0.290664	1.50146				22.363	0.217	0.360537	0.484126
																									4.173	63.622	0.0820079	32.3245					37.486	0.361	0.604351	0.80539				4.737	61.712	0.0763701	137.679
																									2.428	42.686	0.0477151	21.6875					34.774	0.392	0.560628	0.874551				6.259	75.716	0.100908	168.922
																									11.629	1.05	0.228533	0.533474					61.565	11.88	0.992553	26.5042				6.437	18.468	0.103778	41.2021
																									3.918	33.842	0.0769966	17.1941					46.364	2.482	0.747482	5.53734				4.723	57.9	0.0761444	129.175
																									2.235	41.578	0.0439223	21.1246					52.527	3.155	0.846842	7.0388				3.515	59.085	0.056669	131.818
																									6.973	0.386	0.137034	0.196115					58.021	0.341	0.935417	0.76077				5.731	59.661	0.0923954	133.104
																									6.995	0.264	0.137466	0.134131					32.582	0.535	0.525288	1.19358				21.512	0.465	0.346817	1.03741
																									2.518	25.499	0.0494838	12.9553					52.188	0.409	0.841377	0.912478				30.529	0.185	0.49219	0.412734
																									9.449	0.063	0.185692	0.0320084					63.913	0.324	1.03041	0.722843				26.935	0.512	0.434247	1.14227
																									14.202	0.178	0.279098	0.0904365					29.472	0.253	0.475149	0.564442				24.373	0.048	0.392942	0.107088
																									19.211	0.07	0.377535	0.0355649					42.565	1.054	0.686234	2.35147				22.292	1.251	0.359392	2.79098
																									1.156	17.18	0.0227177	8.72865					41.278	0.446	0.665485	0.995025				33.951	0.061	0.547359	0.136091
																									7.966	0.069	0.156548	0.0350569					42.394	0.325	0.683478	0.725074				30.846	0.201	0.4973	0.44843
																									16.703	0.158	0.328248	0.0802751					49.74	0.309	0.80191	0.689378				32.309	0.052	0.520887	0.116012
																									12.975	0.194	0.254985	0.0985657					55.161	0.345	0.889308	0.769694				33.385	0.185	0.538234	0.412734
																									16.061	0.056	0.315631	0.0284519					45.656	0.299	0.736068	0.667068				22.141	0.502	0.356958	1.11996
																									14.06	0.242	0.276307	0.122953					39.145	0.377	0.631097	0.841086				23.221	0.201	0.37437	0.44843
																									12.409	0.137	0.243862	0.0696056					35.869	0.225	0.578281	0.501974				18.051	0.238	0.291019	0.530977
																									6.899	0.524	0.135579	0.266229					41.771	0.472	0.673434	1.05303				32.366	1.7	0.521806	3.7927
																									16.832	0.283	0.330783	0.143784					39.951	2.176	0.644091	4.85465				23.245	0.341	0.374757	0.76077
																									3.425	63.016	0.0673082	32.0166					34.486	0.326	0.555985	0.727305				25.937	0.214	0.418157	0.477433
																									8.486	0.154	0.166767	0.0782428					55.894	0.377	0.901125	0.841086				14.535	0.106	0.234334	0.236486
																									5.692	0.84	0.111859	0.426779					55.752	0.956	0.898836	2.13283				26.377	0.31	0.425251	0.691609
																									3.831	63.302	0.0752869	32.1619					51.284	0.294	0.826802	0.655913				17.381	1.071	0.280217	2.3894
																									0.677	9.937	0.0133044	5.0487					42.736	0.971	0.688991	2.1663				23.519	0.175	0.379174	0.390425
																									15.439	0.275	0.303408	0.139719					60.831	0.898	0.98072	2.00344				33.078	0.308	0.533285	0.687147
																									17.789	0.182	0.34959	0.0924688					54.853	0.425	0.884342	0.948174				32.003	0.184	0.515953	0.410504
																									4.266	24.822	0.0838355	12.6113					58.059	7.731	0.936029	17.2478				21.604	0.049	0.3483	0.109319
																									15.068	0.049	0.296117	0.0248954					29.124	1.813	0.469538	4.0448				27.522	0.082	0.443711	0.182942
																									3.64	77.547	0.0715334	39.3993					56.945	0.71	0.918069	1.58401				6.664	134.399	0.107437	299.844
																									3.416	58.464	0.0671313	29.7038					58.979	0.247	0.950862	0.551056				22.186	1.234	0.357683	2.75305
																									14.611	0.514	0.287136	0.261148					31.437	0.204	0.506828	0.455123				20.143	0.048	0.324746	0.107088
																									3.465	56.75	0.0680943	28.833					52.573	0.838	0.847584	1.86958				23.998	0.111	0.386897	0.247641
																									10.931	0.042	0.214816	0.021339					50.687	1.353	0.817178	3.01854				24.474	0.106	0.394571	0.236486
																									14.547	0.259	0.285878	0.13159					38.39	0.199	0.618925	0.443968				17.562	0.174	0.283135	0.388194
																									2.135	31.844	0.0419571	16.179					47.992	0.311	0.773729	0.69384				22.081	0.259	0.355991	0.577828
																									3.034	40.972	0.0596242	20.8167					45.308	0.34	0.730457	0.758539				29.828	0.03	0.480888	0.0669299
																									19.896	0.271	0.390997	0.137687					56.219	0.294	0.906365	0.655913				18.293	2.522	0.29492	5.62658
																									13.911	0.418	0.273379	0.212373					46.39	0.293	0.747901	0.653682				26.867	0.114	0.433151	0.254334
																									12.782	0.166	0.251192	0.0843397					37.999	0.229	0.612621	0.510898				30.953	0.147	0.499025	0.327957
																									11.369	0.276	0.223424	0.140227					41.867	0.246	0.674981	0.548825				27.943	0.037	0.450498	0.0825469
																									17.434	0.077	0.342613	0.0391214					41.421	0.228	0.667791	0.508667				4.757	64.228	0.0766925	143.292
																									3.105	25.78	0.0610195	13.0981					52.802	0.859	0.851276	1.91643				14.79	0.224	0.238445	0.499743
																									19.484	0.156	0.3829	0.079259					45.97	1.38	0.74113	3.07878				29.136	0.073	0.469732	0.162863
																									11.477	0.106	0.225546	0.0538555					33.503	0.536	0.540137	1.19581				22.295	0.194	0.359441	0.432813
																									11.541	0.404	0.226804	0.20526					55.098	0.279	0.888292	0.622448				30.061	0.136	0.484644	0.303416
																									20.897	0.235	0.410668	0.119397					47.79	0.337	0.770472	0.751846				23.014	0.271	0.371033	0.6046
																									21.089	0.043	0.414442	0.021847					51.645	0.392	0.832623	0.874551				23.3	0.469	0.375643	1.04634
																									13.632	0.148	0.267896	0.0751944					48.918	0.227	0.788658	0.506436				13.089	0.434	0.211021	0.968253
																									13.092	0.126	0.257284	0.0640169					50.918	0.236	0.820902	0.526515				5.34	78.998	0.0860917	176.244
																									18.159	0.168	0.356861	0.0853558					44.03	0.267	0.709853	0.595676				5.59	96.766	0.0901222	215.885
																									13.521	0.042	0.265715	0.021339					52.003	0.214	0.838394	0.477433				4.339	72.549	0.0699535	161.857
																									15.5	0.356	0.304606	0.180873					29.802	0.321	0.480469	0.71615				6.035	118.364	0.0972965	264.07
																									4.488	0.603	0.0881983	0.306366					34.572	0.302	0.557371	0.673761				22.34	0.254	0.360166	0.566673
																									14.189	0.275	0.278843	0.139719					47.335	1.104	0.763137	2.46302				20.154	0.051	0.324923	0.113781
																									20.369	0.293	0.400292	0.148865					44.547	0.344	0.718188	0.767463				18.712	0.078	0.301676	0.174018
																									12.67	0.137	0.248991	0.0696056					66.322	0.365	1.06925	0.814314				20.502	0.272	0.330534	0.606831
																									12.951	0.314	0.254513	0.159534					70.908	0.256	1.14318	0.571135				3.821	67.752	0.0616023	151.155
																									8.015	0.069	0.157511	0.0350569					50.367	0.265	0.812019	0.591214				3.87	54.835	0.0623923	122.337
																									12.051	0.418	0.236827	0.212373					45.71	0.28	0.736938	0.624679				33.316	0.117	0.537122	0.261027
																									4.596	0.393	0.0903207	0.199672					29.194	0.31	0.470667	0.691609				4.154	58.064	0.0669709	129.541
																									3.515	0.204	0.0690769	0.103646					47.831	0.252	0.771133	0.562211				17.845	0.288	0.287698	0.642527
																									10.273	0.803	0.201885	0.407981					43.437	0.262	0.700293	0.584521				4.105	61.321	0.066181	136.807
																									22.86	0.216	0.449245	0.109743					49.493	0.325	0.797928	0.725074				24.185	0.106	0.389911	0.236486
																									4.408	0.13	0.0866261	0.0660491					43.872	0.656	0.707306	1.46353				4.003	73.461	0.0645365	163.891
																									10.542	0.67	0.207172	0.340407					36.958	0.357	0.595838	0.796466				4.164	79.832	0.0671322	178.105
																									19.816	0.135	0.389425	0.0685895					43.039	0.392	0.693876	0.874551				4.113	82.155	0.0663099	183.288
																									2.722	0.1	0.0534928	0.050807					50.79	0.338	0.818838	0.754077				12.788	0.248	0.206169	0.553287
																									11.653	1.134	0.229005	0.576152					55.055	0.328	0.887599	0.731767				6.294	74.944	0.101472	167.2
																									27.309	0.089	0.536677	0.0452183					44.712	0.313	0.720848	0.698302				4.245	75.296	0.068438	167.985
																									4.155	0.52	0.0816542	0.264197					47.221	0.305	0.761299	0.680454				21.424	0.33	0.345398	0.736229
																									1.62	23.649	0.0318363	12.0154					58.786	0.255	0.94775	0.568904				5.665	68.155	0.0913313	152.054
																									19.539	0.905	0.383981	0.459804					51.428	0.38	0.829124	0.847779				7.636	76.756	0.123108	171.242
																									4.315	82.621	0.0847985	41.9773					52.81	0.266	0.851405	0.593445				22.818	0.081	0.367873	0.180711
																									2.665	47.501	0.0523726	24.1339					54.147	0.286	0.87296	0.638065				28.299	0.491	0.456237	1.09542
																									3.093	59.079	0.0607837	30.0163					36.021	0.219	0.580732	0.488588				6.251	100.508	0.100779	224.233
																									3.024	56.666	0.0594277	28.7903					41.935	0.389	0.676078	0.867858				4.708	78.522	0.0759025	175.182
																									2.441	45.505	0.0479706	23.1197					42.952	0.347	0.692474	0.774156				25.38	0.109	0.409177	0.243179
																									3.217	65.621	0.0632206	33.3401					26.382	0.249	0.425332	0.555518				4.786	91.901	0.0771601	205.031
																									4.405	78.476	0.0865672	39.8713					50.458	0.443	0.813486	0.988332				5.85	83.313	0.0943139	185.871
																									2.482	45.603	0.0487763	23.1695					29.153	0.291	0.470006	0.64922				14.221	0.06	0.229271	0.13386
																									4.481	101.278	0.0880607	51.4564					59.88	0.3	0.965387	0.669299				28.498	0.098	0.459446	0.218638
																									1.98	25.86	0.038911	13.1387					35.91	0.475	0.578942	1.05972				3.84	65.947	0.0619086	147.128
																									2.037	31.721	0.0400312	16.1165					41.024	0.288	0.66139	0.642527				28.076	1.624	0.452642	3.62314
																									4.805	99.008	0.094428	50.303					56.311	0.292	0.907848	0.651451				25.074	2.74	0.404244	6.11293
																									3.508	70.244	0.0689393	35.6889					57.855	0.193	0.93274	0.430582				26.014	0.172	0.419399	0.383732
																									22.439	0.141	0.440972	0.0716379					52.194	0.25	0.841474	0.557749				12.089	0.694	0.194899	1.54831
																									2.403	38.12	0.0472238	19.3676					41.722	0.894	0.672644	1.99451				25.776	0.077	0.415562	0.171787
																									2.47	46.437	0.0485405	23.5933					35.012	0.292	0.564465	0.651451				13.794	0.735	0.222387	1.63978
																									14.531	1.414	0.285564	0.718412					64.91	0.258	1.04648	0.575597				5.692	87.457	0.0917666	195.116
																									4.452	89.624	0.0874908	45.5353					49.457	0.277	0.797347	0.617986				5.374	0.113	0.0866398	0.252103
																									3.165	43.985	0.0621987	22.3475					57.452	0.424	0.926243	0.945943				26.27	0.099	0.423526	0.220869
																									4.6	89.569	0.0903993	45.5074					37.073	0.279	0.597692	0.622448				18.085	0.363	0.291567	0.809852
																									3.696	60.232	0.0726339	30.6021					38.751	0.34	0.624745	0.758539				21.443	0.033	0.345705	0.0736229
																									16.38	2.162	0.3219	1.09845					46.688	0.233	0.752706	0.519822				20.517	0.067	0.330776	0.149477
																									2.494	37.807	0.0490121	19.2086					65.05	0.28	1.04874	0.624679				9.85	43.513	0.158802	97.0774
																									2.451	32.353	0.0481671	16.4376					35.027	0.308	0.564707	0.687147				19.165	0.106	0.308979	0.236486
																									4.183	50.789	0.0822044	25.8044					56.982	0.336	0.918666	0.749615				15.683	0.058	0.252842	0.129398
																									3.062	44.793	0.0601745	22.758					62.985	0.229	1.01545	0.510898				2.879	37.592	0.0464153	83.8677
																									3.043	1.213	0.0598011	0.616289					64.54	0.182	1.04052	0.406042				26.509	0.207	0.427379	0.461816
																									3.73	68.548	0.073302	34.8272					67.308	0.323	1.08514	0.720612				4.154	60.803	0.0669709	135.651
																									20.636	1.075	0.405539	0.546176					68.066	0.246	1.09736	0.548825				17.48	0.125	0.281813	0.278875
																									3.821	73.784	0.0750904	37.4875					33.313	0.316	0.537073	0.704995				5.498	103.215	0.0886389	230.272
																									12.224	0.285	0.240226	0.1448					40.241	0.312	0.648767	0.696071				3.362	71.878	0.0542023	160.36
																									6.096	68.888	0.119799	35					30.082	0.385	0.484983	0.858934				19.253	0.444	0.310398	0.990563
																									3.23	50.702	0.063476	25.7602					71.849	0.304	1.15835	0.678223				30.514	0.077	0.491948	0.171787
																									18.265	0.22	0.358944	0.111775					41.691	0.323	0.672144	0.720612				17.624	0.308	0.284135	0.687147
																									5.218	70.38	0.102544	35.758					63.433	0.213	1.02267	0.475202				20.675	0.616	0.333323	1.37429
																									3.32	52.067	0.0652447	26.4537					66.415	0.273	1.07074	0.609062				23.843	0.436	0.384398	0.972715
																									19.994	0.293	0.392923	0.148865					73.342	0.287	1.18242	0.640296				28.957	0.928	0.466846	2.07037
																									8.845	1.209	0.173822	0.614257					35.256	1.962	0.568398	4.37722
																									2.778	28.331	0.0545933	14.3941					126.616	0.318	2.04131	0.709457
																									2.547	30.576	0.0500537	15.5348					66.231	0.466	1.06778	1.03964
																									3.369	59.39	0.0662077	30.1743					55.646	0.744	0.897127	1.65986
																									2.598	37.209	0.051056	18.9048					35.221	0.256	0.567834	0.571135
																									6.365	2.408	0.125085	1.22343					33.087	0.535	0.53343	1.19358
																									2.539	34.417	0.0498965	17.4863					54.182	0.214	0.873524	0.477433
																									16.535	0.895	0.324946	0.454723					42.726	0.381	0.68883	0.85001
																									0.682	0.256	0.0134027	0.130066					61.892	0.242	0.997825	0.539901
																																	55.737	0.242	0.898594	0.539901
																																	56.94	0.219	0.917989	0.488588
																																	59.304	0.239	0.956101	0.533208
																																	60.47	0.203	0.974899	0.452892
																																	32.442	0.248	0.523031	0.553287
																																	32.586	0.344	0.525353	0.767463
																																	59.2	0.267	0.954424	0.595676
																																	53.687	0.408	0.865544	0.910247
																																	47.875	0.248	0.771842	0.553287
																																	42.513	0.239	0.685396	0.533208
																																	125.115	0.266	2.01711	0.593445
																																	129.478	0.21	2.08745	0.468509
																																	109.683	0.203	1.76831	0.452892
																																	117.318	0.225	1.8914	0.501974
																																	113.942	0.28	1.83698	0.624679
																																	113.785	0.23	1.83445	0.513129
																																	134.725	0.218	2.17204	0.486357
																																	94.119	0.25	1.51739	0.557749
																																	122.502	0.283	1.97498	0.631372
																																	123.233	0.208	1.98677	0.464047
																																	132.961	0.228	2.1436	0.508667
																																	125.475	0.21	2.02291	0.468509
																																	136.11	0.281	2.19437	0.62691
																																	134.386	0.218	2.16658	0.486357
																																	107.846	0.28	1.7387	0.624679
																																	124.259	0.225	2.00331	0.501974
																																	127.949	0.242	2.0628	0.539901
																																	123.687	0.221	1.99409	0.49305
																																	124.923	0.233	2.01401	0.519822
																																	123.839	0.22	1.99654	0.490819
																																	134.012	0.222	2.16055	0.495281
																																	132.073	0.168	2.12929	0.374808
																																	127.053	0.287	2.04835	0.640296
																																	135.321	0.276	2.18165	0.615755
																																	125.936	0.29	2.03034	0.646989
																																	116.358	0.24	1.87593	0.535439
																																	128.192	0.22	2.06672	0.490819
																																	133.158	0.259	2.14678	0.577828
																																	110.458	0.272	1.78081	0.606831
																																	138.433	0.208	2.23182	0.464047
																																	115.861	0.286	1.86792	0.638065
																																	105.574	0.229	1.70207	0.510898
																																	91.426	0.266	1.47397	0.593445
																																	112.452	0.232	1.81296	0.517591
																																	113.035	0.262	1.82235	0.584521
																																	127.208	0.326	2.05085	0.727305
																																	115.617	0.351	1.86398	0.78308
																																	111.937	0.23	1.80465	0.513129
																																	109.933	0.229	1.77234	0.510898
																																	98.69	0.246	1.59108	0.548825
																																	125.578	0.21	2.02457	0.468509
																																	101.747	0.238	1.64037	0.530977
																																	120.556	0.23	1.94361	0.513129
																																	131.351	0.223	2.11765	0.497512
																																	124.099	0.264	2.00073	0.588983
																																	124.91	0.253	2.0138	0.564442
																																	104.058	0.224	1.67763	0.499743
																																	142.604	0.231	2.29907	0.51536
																																	119.1	0.231	1.92013	0.51536
																																	93.729	0.259	1.5111	0.577828
																																	108.364	0.182	1.74705	0.406042
																																	94.578	0.231	1.52479	0.51536
																																	137.733	0.282	2.22054	0.629141
																																	120.886	0.208	1.94893	0.464047
																																	139.405	0.228	2.24749	0.508667
																																	105.815	0.241	1.70595	0.53767
																																	121.369	0.203	1.95672	0.452892
																																	99.861	0.317	1.60996	0.707226
																																	101.341	0.202	1.63382	0.450661
																																	133.954	0.214	2.15961	0.477433
																																	134.499	0.24	2.1684	0.535439
																																	128.985	0.307	2.0795	0.684916
																																	126.682	0.206	2.04237	0.459585
																																	117.279	0.221	1.89078	0.49305
																																	123.691	0.238	1.99415	0.530977
																																	123.356	0.292	1.98875	0.651451
																																	102.42	0.217	1.65122	0.484126
																																	140.467	0.225	2.26461	0.501974
																																	142.902	0.232	2.30387	0.517591
																																	104.369	0.233	1.68264	0.519822
																																	91.038	0.251	1.46772	0.55998
																																	113.544	0.206	1.83056	0.459585
																																	107.931	0.22	1.74007	0.490819
																																	124.077	0.247	2.00037	0.551056
																																	127.958	0.211	2.06294	0.47074
																																	109.186	0.414	1.7603	0.923633
																																	83.104	0.259	1.33981	0.577828
																																	112.438	0.231	1.81273	0.51536
																																	108.96	0.288	1.75666	0.642527
																																	101.833	0.306	1.64176	0.682685
																																	131.217	0.246	2.11549	0.548825
																																	133.003	0.303	2.14428	0.675992
																																	124.342	0.216	2.00465	0.481895
																																	89.777	0.216	1.44739	0.481895
																																	127.62	0.204	2.05749	0.455123
																																	95.557	0.258	1.54057	0.575597
																																	114.297	0.276	1.8427	0.615755
																																	137.988	0.281	2.22465	0.62691
																																	104.614	0.259	1.68659	0.577828
																																	139.958	0.241	2.25641	0.53767
																																	102.954	0.313	1.65983	0.698302
																																	134.769	0.236	2.17275	0.526515
																																	98.914	0.276	1.59469	0.615755
																																	122.672	0.25	1.97772	0.557749
																																	144.745	0.242	2.33358	0.539901
																																	129.967	0.255	2.09533	0.568904
																																	116.459	0.255	1.87756	0.568904
																																	122.92	0.204	1.98172	0.455123
																																	111.098	0.317	1.79113	0.707226
																																	110.052	0.309	1.77426	0.689378
																																	119.557	0.252	1.9275	0.562211
																																	134.552	0.219	2.16925	0.488588
																																	120.058	0.246	1.93558	0.548825
																																	122.787	0.251	1.97958	0.55998
																																	113.357	0.28	1.82755	0.624679
																																	115.615	0.239	1.86395	0.533208
																																	131.296	0.233	2.11676	0.519822
																																	96.056	0.233	1.54862	0.519822
																																	123.432	0.297	1.98998	0.662606
																																	91.506	0.24	1.47526	0.535439
																																	128.164	0.251	2.06626	0.55998
																																	125.344	0.207	2.0208	0.461816
																																	131.818	0.309	2.12517	0.689378
																																	107.767	0.327	1.73742	0.729536
																																	127.965	0.265	2.06306	0.591214
																																	89.188	0.232	1.43789	0.517591
																																	114.325	0.31	1.84315	0.691609
																																	114.937	0.249	1.85302	0.555518
																																	119.118	0.241	1.92042	0.53767
																																	132.761	0.242	2.14038	0.539901
																																	130.124	0.254	2.09786	0.566673
																																	126.327	0.209	2.03665	0.466278
																																	104.892	0.362	1.69107	0.807621
																																	114.421	0.28	1.8447	0.624679
																																	121.739	0.245	1.96268	0.546594
																																	148.845	0.281	2.39968	0.62691
																																	115.569	0.329	1.86321	0.733998
																																	110.53	0.278	1.78197	0.620217
																																	114.903	0.253	1.85247	0.564442
																																	157.706	0.268	2.54254	0.597907
																																	108.826	0.302	1.7545	0.673761
																																	107.386	0.289	1.73128	0.644758
																																	142.396	0.233	2.29571	0.519822
																																	97.403	0.573	1.57033	1.27836
																																	123.817	0.239	1.99618	0.533208
																																	110.204	0.269	1.77671	0.600138
																																	124.797	0.386	2.01198	0.861165
																																	118.83	0.273	1.91578	0.609062
																																	125.05	0.364	2.01606	0.812083
[truncated: 113 more rows]

## Sheet: F1I, J
Fluorescence intensity analysis of SOX2 and SOX17 in RUES2 hESCs treated with ACL for 6 days using Fiji
[truncated: 1,038 more rows]

[truncated: 1 more sheets: F1K]
