# Supplementary material for: An in vitro stem cell model of human epiblast and yolk sac interaction
Source: eLife. 2021 Aug 17;10:e63930. doi: 10.7554/eLife.63930 (PMC8370770; doi:10.7554/eLife.63930)
Supplement: Figure 3—figure supplement 1—source data 1. [file elife-63930-fig3-figsupp1-data1.xlsx]

## Sheet: F3FS1A
Analysis of the effect of 24 hours in ACL at the start of in vitro mouse embryo cultureas a chimera control
	Raw																		Normalised
	KSOM		Number of cells						ACL-KSOM		Number of cells								KSOM		Number of cells							ACL-KSOM		Number of cells								EPI (NANOG+)					PrE (SOX17+)					EPI/PrE
			EPI (NANOG+)	PrE (SOX17+)	EPI/PrE	total ICM	PrE/Epi	% coexp			EPI (NANOG+)	PrE (SOX17+)	EPI/PrE	total ICM	PrE/Epi	% coexp					EPI (NANOG+)	PrE (SOX17+)	EPI/PrE	total ICM	PrE/Epi	% coexp				EPI (NANOG+)	PrE (SOX17+)	EPI/PrE	total ICM	PrE/Epi	% coexp			KSOM	ACL-KSOM				KSOM	ACL-KSOM				KSOM	ACL-KSOM
																																						1.01124	1.01124				0.779221	1.16883				3.33333	1.11111
	Exp1								Exp1										Exp1									Exp1										1.34831	1.46067				1.03896	1.03896				1.11111	3.33333
		Embryo 1	9	6	3	18	0.666667	0.166667		Embryo 1	9	9	1	19	1	0.0526316				Embryo 1	1.01124	0.779221	3.33333	1.02857	0.743845	3.31107			Embryo 1	1.01124	1.16883	1.11111	1.08571	1.11577	1.0456			1.23596	1.01124				1.03896	1.03896				1.11111	2.22222
		Embryo 2	12	8	1	21	0.666667	0.047619		Embryo 2	13	8	3	24	0.615385	0.125				Embryo 2	1.34831	1.03896	1.11111	1.2	0.743845	0.946021			Embryo 2	1.46067	1.03896	3.33333	1.37143	0.686626	2.48331			0.674157	0.674157				0.779221	1.03896				0	3.33333
		Embryo 3	11	8	1	20	0.727273	0.05		Embryo 3	9	8	2	19	0.888889	0.105263				Embryo 3	1.23596	1.03896	1.11111	1.14286	0.811467	0.993322			Embryo 3	1.01124	1.03896	2.22222	1.08571	0.991793	2.0912			0.898876	1.01124				1.42857	1.2987				1.11111	1.11111
		Embryo 4	6	6	0	12	1	0		Embryo 4	6	8	3	17	1.33333	0.176471				Embryo 4	0.674157	0.779221	0	0.685714	1.11577	0			Embryo 4	0.674157	1.03896	3.33333	0.971429	1.48769	3.50584			1.1236	1.1236				1.55844	1.94805				0	2.22222
		Embryo 5	8	11	1	20	1.375	0.05		Embryo 5	9	10	1	20	1.11111	0.05				Embryo 5	0.898876	1.42857	1.11111	1.14286	1.53418	0.993322			Embryo 5	1.01124	1.2987	1.11111	1.14286	1.23974	0.993322			1.01124	1.23596				0.779221	0.779221				2.22222	4.44444
		Embryo 6	10	12	0	22	1.2	0		Embryo 6	10	15	2	27	1.5	0.0740741				Embryo 6	1.1236	1.55844	0	1.25714	1.33892	0			Embryo 6	1.1236	1.94805	2.22222	1.54286	1.67365	1.47159			1.23596	0				0.909091	0.193548				0	1.30435
		Embryo 7	9	6	2	17	0.666667	0.117647		Embryo 7	11	6	4	21	0.545455	0.190476				Embryo 7	1.01124	0.779221	2.22222	0.971429	0.743845	2.33723			Embryo 7	1.23596	0.779221	4.44444	1.2	0.6086	3.78408			0.674157	1.22727				0.909091	0.967742				0	0.521739
		Embryo 8	11	7	0	18	0.636364	0												Embryo 8	1.23596	0.909091	0	1.02857	0.710033	0												0.786517	0.818182				0.779221	0.580645				1.11111	1.56522
		Embryo 9	6	7	0	13	1.16667	0			9.57143	9.14286	2.28571	21	0.999167	0.110559				Embryo 9	0.674157	0.909091	0	0.742857	1.30173	0				1.07544	1.18738	2.53968	1.2	1.11484	2.19642			0.409091	1.90909				0.774194	1.93548				0.782609	0.26087
		Embryo 10	7	6	1	14	0.857143	0.0714286												Embryo 10	0.786517	0.779221	1.11111	0.8	0.956372	1.41903												0.545455	0.818182				0.580645	0.774194				0.521739	0
																																						1.36364	0.818182				1.54839	1.16129				0.26087	0.782609
		Average	8.9	7.7	0.9	17.5	0.896245	0.0503361												Average	1	1	1	1	1	1												1.5	0.818182				0.967742	1.35484				1.04348	2.08696
																																						1.09091					0.774194					1.56522
																																						1.09091					1.35484					1.82609
			Number of cells								Number of cells										Number of cells									Number of cells
			EPI (NANOG+)	PrE (SOX17+)	EPI/PrE	total ICM	PrE/Epi	% coexp			EPI (NANOG+)	PrE (SOX17+)	EPI/PrE	total ICM	PrE/Epi	% coexp					EPI (NANOG+)	PrE (SOX17+)	EPI/PrE	total ICM	PrE/Epi	% coexp				EPI (NANOG+)	PrE (SOX17+)	EPI/PrE	total ICM	PrE/Epi	% coexp
	Exp 2								Exp 2										Exp 2									Exp 2										Number of values	16	14			Number of values	16	14			Number of values	16
		Embryo 1	3	4	3	10	1.33333	0.3		Embryo 1	0	1	5	6	0	0.833333				Embryo 1	0.409091	0.774194	0.782609	0.612245	1.69748	1.26195			Embryo 1	0	0.193548	1.30435	0.367347	0	3.5054
		Embryo 2	4	3	2	9	0.75	0.222222		Embryo 2	9	5	2	16	0.555556	0.125				Embryo 2	0.545455	0.580645	0.521739	0.55102	0.95483	0.934775			Embryo 2	1.22727	0.967742	0.521739	0.979592	0.707282	0.525811			Minimum	0.4091	0			Minimum	0.5806	0.1935			Minimum	0
		Embryo 3	10	8	1	19	0.8	0.0526316		Embryo 3	6	3	6	15	0.5	0.4				Embryo 3	1.36364	1.54839	0.26087	1.16327	1.01849	0.221394			Embryo 3	0.818182	0.580645	1.56522	0.918367	0.636554	1.68259			25% Percentile	0.7022	0.8182			25% Percentile	0.7792	0.778			25% Percentile	0.06522
		Embryo 4	11	5	4	20	0.454545	0.2		Embryo 4	14	10	1	25	0.714286	0.04				Embryo 4	1.5	0.967742	1.04348	1.22449	0.578685	0.841297			Embryo 4	1.90909	1.93548	0.26087	1.53061	0.909362	0.168259			Median	1.051	1.011			Median	0.9091	1.039			Median	1.077
		Embryo 5	8	4	6	18	0.5	0.333333		Embryo 5	6	4	0	10	0.666667	0				Embryo 5	1.09091	0.774194	1.56522	1.10204	0.636554	1.40216			Embryo 5	0.818182	0.774194	0	0.612245	0.848738	0			75% Percentile	1.236	1.229			75% Percentile	1.276	1.313			75% Percentile	1.452
		Embryo 6	8	7	7	22	0.875	0.318182		Embryo 6	6	6	3	15	1	0.2				Embryo 6	1.09091	1.35484	1.82609	1.34694	1.11397	1.33843			Embryo 6	0.818182	1.16129	0.782609	0.918367	1.27311	0.841297			Maximum	1.5	1.909			Maximum	1.558	1.948			Maximum	3.333
										Embryo 7	6	7	8	21	1.16667	0.380952													Embryo 7	0.818182	1.35484	2.08696	1.28571	1.48529	1.60247
		average	7.33333	5.16667	3.83333	16.3333	0.78548	0.237728												average	1	1	1	1	1	1												Mean	1	0.9955			Mean	1	1.091			Mean	1
										average	6.71429	5.14286	3.57143	15.4286	0.657596	0.282755													average	0.915584	0.995392	0.931677	0.944606	0.837191	1.18941			Std. Deviation	0.3131	0.4296			Std. Deviation	0.3072	0.4689			Std. Deviation	0.9243
																																						Std. Error of Mean	0.07829	0.1148			Std. Error of Mean	0.0768	0.1253			Std. Error of Mean	0.2311
																																						Lower 95% CI of mean	0.8331	0.7474			Lower 95% CI of mean	0.8363	0.8207			Lower 95% CI of mean	0.5075
																																						Upper 95% CI of mean	1.167	1.244			Upper 95% CI of mean	1.164	1.362			Upper 95% CI of mean	1.493
																																						Sum	16	13.94			Sum	16	15.28			Sum	16
																																						D'Agostino & Pearson normality test					D'Agostino & Pearson normality test					D'Agostino & Pearson normality test
																																						K2	0.7479	3.235			K2	2.454	0.8928			K2	4.909
																																						P value	0.688	0.1984			P value	0.2932	0.6399			P value	0.0859
																																						Passed normality test (alpha=0.05)?	Yes	Yes			Passed normality test (alpha=0.05)?	Yes	Yes			Passed normality test (alpha=0.05)?	Yes
																																						P value summary	ns	ns			P value summary	ns	ns			P value summary	ns
																																						Unpaired t test					Unpaired t test					Unpaired t test
																																						P value	0.9739				P value	0.5279				P value	0.0805
																																						P value summary	ns				P value summary	ns				P value summary	ns
																																						Significantly different (P < 0.05)?	No				Significantly different (P < 0.05)?	No				Significantly different (P < 0.05)?	No
																																						One- or two-tailed P value?	Two-tailed				One- or two-tailed P value?	Two-tailed				One- or two-tailed P value?	Two-tailed
																																						t, df	t=0.03298 df=28				t, df	t=0.6392 df=28				t, df	t=1.813 df=28
																																						How big is the difference?					How big is the difference?					How big is the difference?
																																						Mean ± SEM of column A	1 ± 0.07829, n=16				Mean ± SEM of column A	1 ± 0.0768, n=16				Mean ± SEM of column A	1 ± 0.2311, n=16
																																						Mean ± SEM of column B	0.9955 ± 0.1148, n=14				Mean ± SEM of column B	1.091 ± 0.1253, n=14				Mean ± SEM of column B	1.736 ± 0.3445, n=14
																																						Difference between means	-0.004487 ± 0.1361				Difference between means	0.09139 ± 0.143				Difference between means	0.7357 ± 0.4057
																																						95% confidence interval	-0.2832 to 0.2742				95% confidence interval	-0.2015 to 0.3843				95% confidence interval	-0.09544 to 1.567
																																						R squared (eta squared)	3.884e-05				R squared (eta squared)	0.01438				R squared (eta squared)	0.1051
																																						F test to compare variances					F test to compare variances					F test to compare variances
																																						F, DFn, Dfd	1.883, 13, 15				F, DFn, Dfd	2.33, 13, 15				F, DFn, Dfd	1.945, 13, 15
																																						P value	0.2413				P value	0.1197				P value	0.2182
																																						P value summary	ns				P value summary	ns				P value summary	ns
																																						Significantly different (P < 0.05)?	No				Significantly different (P < 0.05)?	No				Significantly different (P < 0.05)?	No
[truncated: 4 more columns]

## Sheet: F3FS1B
Analysis of the effect of 24 hours in ACL at the start of in vitro mouse embryo cultureas a chimera control
	Raw																		Normalised
	KSOM		Number of cells						ACL-KSOM		Number of cells								KSOM		Number of cells							ACL-KSOM		Number of cells								NANOG+/SOX17+ : total ICM
			EPI (NANOG+)	PrE (SOX17+)	EPI/PrE	total ICM	PrE/Epi	% coexp			EPI (NANOG+)	PrE (SOX17+)	EPI/PrE	total ICM	PrE/Epi	% coexp					EPI (NANOG+)	PrE (SOX17+)	EPI/PrE	total ICM	PrE/Epi	% coexp				EPI (NANOG+)	PrE (SOX17+)	EPI/PrE	total ICM	PrE/Epi	% coexp			KSOM	ACL-KSOM
																																						3.31107	1.0456
	Exp1								Exp1										Exp1									Exp1										0.946021	2.48331
		Embryo 1	9	6	3	18	0.666667	0.166667		Embryo 1	9	9	1	19	1	0.0526316				Embryo 1	1.01124	0.779221	3.33333	1.02857	0.743845	3.31107			Embryo 1	1.01124	1.16883	1.11111	1.08571	1.11577	1.0456			0.993322	2.0912
		Embryo 2	12	8	1	21	0.666667	0.047619		Embryo 2	13	8	3	24	0.615385	0.125				Embryo 2	1.34831	1.03896	1.11111	1.2	0.743845	0.946021			Embryo 2	1.46067	1.03896	3.33333	1.37143	0.686626	2.48331			0	3.50584
		Embryo 3	11	8	1	20	0.727273	0.05		Embryo 3	9	8	2	19	0.888889	0.105263				Embryo 3	1.23596	1.03896	1.11111	1.14286	0.811467	0.993322			Embryo 3	1.01124	1.03896	2.22222	1.08571	0.991793	2.0912			0.993322	0.993322
		Embryo 4	6	6	0	12	1	0		Embryo 4	6	8	3	17	1.33333	0.176471				Embryo 4	0.674157	0.779221	0	0.685714	1.11577	0			Embryo 4	0.674157	1.03896	3.33333	0.971429	1.48769	3.50584			0	1.47159
		Embryo 5	8	11	1	20	1.375	0.05		Embryo 5	9	10	1	20	1.11111	0.05				Embryo 5	0.898876	1.42857	1.11111	1.14286	1.53418	0.993322			Embryo 5	1.01124	1.2987	1.11111	1.14286	1.23974	0.993322			2.33723	3.78408
		Embryo 6	10	12	0	22	1.2	0		Embryo 6	10	15	2	27	1.5	0.0740741				Embryo 6	1.1236	1.55844	0	1.25714	1.33892	0			Embryo 6	1.1236	1.94805	2.22222	1.54286	1.67365	1.47159			0	3.5054
		Embryo 7	9	6	2	17	0.666667	0.117647		Embryo 7	11	6	4	21	0.545455	0.190476				Embryo 7	1.01124	0.779221	2.22222	0.971429	0.743845	2.33723			Embryo 7	1.23596	0.779221	4.44444	1.2	0.6086	3.78408			0	0.525811
		Embryo 8	11	7	0	18	0.636364	0												Embryo 8	1.23596	0.909091	0	1.02857	0.710033	0												1.41903	1.68259
		Embryo 9	6	7	0	13	1.16667	0			9.57143	9.14286	2.28571	21	0.999167	0.110559				Embryo 9	0.674157	0.909091	0	0.742857	1.30173	0				1.07544	1.18738	2.53968	1.2	1.11484	2.19642			1.26195	0.168259
		Embryo 10	7	6	1	14	0.857143	0.0714286												Embryo 10	0.786517	0.779221	1.11111	0.8	0.956372	1.41903												0.934775	0
																																						0.221394	0.841297
		Average	8.9	7.7	0.9	17.5	0.896245	0.0503361												Average	1	1	1	1	1	1												0.841297	1.60247
																																						1.40216
																																						1.33843
			Number of cells								Number of cells										Number of cells									Number of cells
			EPI (NANOG+)	PrE (SOX17+)	EPI/PrE	total ICM	PrE/Epi	% coexp			EPI (NANOG+)	PrE (SOX17+)	EPI/PrE	total ICM	PrE/Epi	% coexp					EPI (NANOG+)	PrE (SOX17+)	EPI/PrE	total ICM	PrE/Epi	% coexp				EPI (NANOG+)	PrE (SOX17+)	EPI/PrE	total ICM	PrE/Epi	% coexp
	Exp 2								Exp 2										Exp 2									Exp 2										Number of values	16	14
		Embryo 1	3	4	3	10	1.33333	0.3		Embryo 1	0	1	5	6	0	0.833333				Embryo 1	0.409091	0.774194	0.782609	0.612245	1.69748	1.26195			Embryo 1	0	0.193548	1.30435	0.367347	0	3.5054
		Embryo 2	4	3	2	9	0.75	0.222222		Embryo 2	9	5	2	16	0.555556	0.125				Embryo 2	0.545455	0.580645	0.521739	0.55102	0.95483	0.934775			Embryo 2	1.22727	0.967742	0.521739	0.979592	0.707282	0.525811			Minimum	0	0
		Embryo 3	10	8	1	19	0.8	0.0526316		Embryo 3	6	3	6	15	0.5	0.4				Embryo 3	1.36364	1.54839	0.26087	1.16327	1.01849	0.221394			Embryo 3	0.818182	0.580645	1.56522	0.918367	0.636554	1.68259			25% Percentile	0.05535	0.7624
		Embryo 4	11	5	4	20	0.454545	0.2		Embryo 4	14	10	1	25	0.714286	0.04				Embryo 4	1.5	0.967742	1.04348	1.22449	0.578685	0.841297			Embryo 4	1.90909	1.93548	0.26087	1.53061	0.909362	0.168259			Median	0.9697	1.537
		Embryo 5	8	4	6	18	0.5	0.333333		Embryo 5	6	4	0	10	0.666667	0				Embryo 5	1.09091	0.774194	1.56522	1.10204	0.636554	1.40216			Embryo 5	0.818182	0.774194	0	0.612245	0.848738	0			75% Percentile	1.386	2.739
		Embryo 6	8	7	7	22	0.875	0.318182		Embryo 6	6	6	3	15	1	0.2				Embryo 6	1.09091	1.35484	1.82609	1.34694	1.11397	1.33843			Embryo 6	0.818182	1.16129	0.782609	0.918367	1.27311	0.841297			Maximum	3.311	3.784
										Embryo 7	6	7	8	21	1.16667	0.380952													Embryo 7	0.818182	1.35484	2.08696	1.28571	1.48529	1.60247
		average	7.33333	5.16667	3.83333	16.3333	0.78548	0.237728												average	1	1	1	1	1	1												Mean	1	1.693
										average	6.71429	5.14286	3.57143	15.4286	0.657596	0.282755													average	0.915584	0.995392	0.931677	0.944606	0.837191	1.18941			Std. Deviation	0.9051	1.239
																																						Std. Error of Mean	0.2263	0.3313
																																						Lower 95% CI of mean	0.5177	0.9773
																																						Upper 95% CI of mean	1.482	2.409
																																						Sum	16	23.7
																																						D'Agostino & Pearson normality test
																																						K2	5.661	1.303
																																						P value	0.059	0.5213
																																						Passed normality test (alpha=0.05)?	Yes	Yes
																																						P value summary	ns	ns
																																						Unpaired t test
																																						P value	0.0886
																																						P value summary	ns
																																						Significantly different (P < 0.05)?	No
																																						One- or two-tailed P value?	Two-tailed
																																						t, df	t=1.764 df=28
																																						How big is the difference?
																																						Mean ± SEM of column A	1 ± 0.2263, n=16
																																						Mean ± SEM of column B	1.693 ± 0.3313, n=14
																																						Difference between means	0.6929 ± 0.3928
																																						95% confidence interval	-0.1117 to 1.498
																																						R squared (eta squared)	0.1
																																						F test to compare variances
																																						F, DFn, Dfd	1.875, 13, 15
																																						P value	0.2441
																																						P value summary	ns
																																						Significantly different (P < 0.05)?	No

## Sheet: F3FS1C
Analysis of the effect of 24 hours in ACL at the start of in vitro mouse embryo cultureas a chimera control
	Raw																		Normalised
	KSOM		Number of cells						ACL-KSOM		Number of cells								KSOM		Number of cells							ACL-KSOM		Number of cells								SOX17+ : NANOG+
			EPI (NANOG+)	PrE (SOX17+)	EPI/PrE	total ICM	PrE/Epi	% coexp			EPI (NANOG+)	PrE (SOX17+)	EPI/PrE	total ICM	PrE/Epi	% coexp					EPI (NANOG+)	PrE (SOX17+)	EPI/PrE	total ICM	PrE/Epi	% coexp				EPI (NANOG+)	PrE (SOX17+)	EPI/PrE	total ICM	PrE/Epi	% coexp			KSOM	ACL-KSOM
																																						0.743845	1.11577
	Exp1								Exp1										Exp1									Exp1										0.743845	0.686626
		Embryo 1	9	6	3	18	0.666667	0.166667		Embryo 1	9	9	1	19	1	0.0526316				Embryo 1	1.01124	0.779221	3.33333	1.02857	0.743845	3.31107			Embryo 1	1.01124	1.16883	1.11111	1.08571	1.11577	1.0456			0.811467	0.991793
		Embryo 2	12	8	1	21	0.666667	0.047619		Embryo 2	13	8	3	24	0.615385	0.125				Embryo 2	1.34831	1.03896	1.11111	1.2	0.743845	0.946021			Embryo 2	1.46067	1.03896	3.33333	1.37143	0.686626	2.48331			1.11577	1.48769
		Embryo 3	11	8	1	20	0.727273	0.05		Embryo 3	9	8	2	19	0.888889	0.105263				Embryo 3	1.23596	1.03896	1.11111	1.14286	0.811467	0.993322			Embryo 3	1.01124	1.03896	2.22222	1.08571	0.991793	2.0912			1.53418	1.23974
		Embryo 4	6	6	0	12	1	0		Embryo 4	6	8	3	17	1.33333	0.176471				Embryo 4	0.674157	0.779221	0	0.685714	1.11577	0			Embryo 4	0.674157	1.03896	3.33333	0.971429	1.48769	3.50584			1.33892	1.67365
		Embryo 5	8	11	1	20	1.375	0.05		Embryo 5	9	10	1	20	1.11111	0.05				Embryo 5	0.898876	1.42857	1.11111	1.14286	1.53418	0.993322			Embryo 5	1.01124	1.2987	1.11111	1.14286	1.23974	0.993322			0.743845	0.6086
		Embryo 6	10	12	0	22	1.2	0		Embryo 6	10	15	2	27	1.5	0.0740741				Embryo 6	1.1236	1.55844	0	1.25714	1.33892	0			Embryo 6	1.1236	1.94805	2.22222	1.54286	1.67365	1.47159			0.710033	0
		Embryo 7	9	6	2	17	0.666667	0.117647		Embryo 7	11	6	4	21	0.545455	0.190476				Embryo 7	1.01124	0.779221	2.22222	0.971429	0.743845	2.33723			Embryo 7	1.23596	0.779221	4.44444	1.2	0.6086	3.78408			1.30173	0.707282
		Embryo 8	11	7	0	18	0.636364	0												Embryo 8	1.23596	0.909091	0	1.02857	0.710033	0												0.956372	0.636554
		Embryo 9	6	7	0	13	1.16667	0			9.57143	9.14286	2.28571	21	0.999167	0.110559				Embryo 9	0.674157	0.909091	0	0.742857	1.30173	0				1.07544	1.18738	2.53968	1.2	1.11484	2.19642			1.69748	0.909362
		Embryo 10	7	6	1	14	0.857143	0.0714286												Embryo 10	0.786517	0.779221	1.11111	0.8	0.956372	1.41903												0.95483	0.848738
																																						1.01849	1.27311
		Average	8.9	7.7	0.9	17.5	0.896245	0.0503361												Average	1	1	1	1	1	1												0.578685	1.48529
																																						0.636554
																																						1.11397
			Number of cells								Number of cells										Number of cells									Number of cells
			EPI (NANOG+)	PrE (SOX17+)	EPI/PrE	total ICM	PrE/Epi	% coexp			EPI (NANOG+)	PrE (SOX17+)	EPI/PrE	total ICM	PrE/Epi	% coexp					EPI (NANOG+)	PrE (SOX17+)	EPI/PrE	total ICM	PrE/Epi	% coexp				EPI (NANOG+)	PrE (SOX17+)	EPI/PrE	total ICM	PrE/Epi	% coexp
	Exp 2								Exp 2										Exp 2									Exp 2										Number of values	16	14
		Embryo 1	3	4	3	10	1.33333	0.3		Embryo 1	0	1	5	6	0	0.833333				Embryo 1	0.409091	0.774194	0.782609	0.612245	1.69748	1.26195			Embryo 1	0	0.193548	1.30435	0.367347	0	3.5054
		Embryo 2	4	3	2	9	0.75	0.222222		Embryo 2	9	5	2	16	0.555556	0.125				Embryo 2	0.545455	0.580645	0.521739	0.55102	0.95483	0.934775			Embryo 2	1.22727	0.967742	0.521739	0.979592	0.707282	0.525811			Minimum	0.5787	0
		Embryo 3	10	8	1	19	0.8	0.0526316		Embryo 3	6	3	6	15	0.5	0.4				Embryo 3	1.36364	1.54839	0.26087	1.16327	1.01849	0.221394			Embryo 3	0.818182	0.580645	1.56522	0.918367	0.636554	1.68259			25% Percentile	0.7438	0.6741
		Embryo 4	11	5	4	20	0.454545	0.2		Embryo 4	14	10	1	25	0.714286	0.04				Embryo 4	1.5	0.967742	1.04348	1.22449	0.578685	0.841297			Embryo 4	1.90909	1.93548	0.26087	1.53061	0.909362	0.168259			Median	0.9556	0.9506
		Embryo 5	8	4	6	18	0.5	0.333333		Embryo 5	6	4	0	10	0.666667	0				Embryo 5	1.09091	0.774194	1.56522	1.10204	0.636554	1.40216			Embryo 5	0.818182	0.774194	0	0.612245	0.848738	0			75% Percentile	1.255	1.326
		Embryo 6	8	7	7	22	0.875	0.318182		Embryo 6	6	6	3	15	1	0.2				Embryo 6	1.09091	1.35484	1.82609	1.34694	1.11397	1.33843			Embryo 6	0.818182	1.16129	0.782609	0.918367	1.27311	0.841297			Maximum	1.697	1.674
										Embryo 7	6	7	8	21	1.16667	0.380952													Embryo 7	0.818182	1.35484	2.08696	1.28571	1.48529	1.60247
		average	7.33333	5.16667	3.83333	16.3333	0.78548	0.237728												average	1	1	1	1	1	1												Mean	1	0.976
										average	6.71429	5.14286	3.57143	15.4286	0.657596	0.282755													average	0.915584	0.995392	0.931677	0.944606	0.837191	1.18941			Std. Deviation	0.3301	0.4442
																																						Std. Error of Mean	0.08252	0.1187
																																						Lower 95% CI of mean	0.8241	0.7195
																																						Upper 95% CI of mean	1.176	1.232
																																						Sum	16	13.66
																																						D'Agostino & Pearson normality test
																																						K2	1.879	0.835
																																						P value	0.3909	0.6587
																																						Passed normality test (alpha=0.05)?	Yes	Yes
																																						P value summary	ns	ns
																																						Unpaired t test
																																						P value	0.8668
																																						P value summary	ns
																																						Significantly different (P < 0.05)?	No
																																						One- or two-tailed P value?	Two-tailed
																																						t, df	t=0.1692 df=28
																																						How big is the difference?
																																						Mean ± SEM of column A	1 ± 0.08252, n=16
																																						Mean ± SEM of column B	0.976 ± 0.1187, n=14
																																						Difference between means	-0.02399 ± 0.1417
																																						95% confidence interval	-0.3143 to 0.2663
																																						R squared (eta squared)	0.001022
																																						F test to compare variances
																																						F, DFn, Dfd	1.811, 13, 15
																																						P value	0.2709
																																						P value summary	ns
																																						Significantly different (P < 0.05)?	No

## Sheet: F3FS1D
Contingency table comparing viability of mouse embryos cultured in ACL for the first 24 hours of culture
			DND	Blastocyst
		KSOM	4	10
		KSOM-ACL	7	21
		Test	Fisher's exact test
		P value	>0.9999
		P value summary	ns
		One- or two-sided	Two-sided
		Statistically significant (P < 0.05)?	No
		Data analyzed	DND	Blastocyst	Total
		KSOM	4	10	14
		KSOM-ACL	7	21	28
		Total	11	31	42
		Percentage of row total	DND	Blastocyst
		KSOM	28.57%	71.43%
		KSOM-ACL	25.00%	75.00%
		Percentage of column total	DND	Blastocyst
		KSOM	36.36%	32.26%
		KSOM-ACL	63.64%	67.74%
		Percentage of grand total	DND	Blastocyst
		KSOM	9.52%	23.81%
		KSOM-ACL	16.67%	50.00%
