# Supplementary material for: An in vitro stem cell model of human epiblast and yolk sac interaction
Source: eLife. 2021 Aug 17;10:e63930. doi: 10.7554/eLife.63930 (PMC8370770; doi:10.7554/eLife.63930)
Supplement: Figure 3—figure supplement 2—source data 1. [file elife-63930-fig3-figsupp2-data1.xlsx]

## Sheet: F3F2B
Data for pre-implantation chimera pie charts for hEPSCs
		hEPSC
		Typs of contribution	Number of embryos
		No Contribution	9
		Epiblast (HuNu+/SOX2+)	8
		Primitive Endoderm (HuNu+/GATA6+)	0
		Both Epiblast and Primitive Endoderm	1
		Total	18

## Sheet: F3F2D
Data for pre-implantation chimera pie charts for Rset
		Rset
		Typs of contribution	Number of embryos
		No Contribution	4
		Epiblast (HuNu+/SOX2+)	21
		Primitive Endoderm (HuNu+/GATA6+)	0
		Both Epiblast and Primitive Endoderm	1
		Total	26
