# Supplementary material for: An in vitro stem cell model of human epiblast and yolk sac interaction
Source: eLife. 2021 Aug 17;10:e63930. doi: 10.7554/eLife.63930 (PMC8370770; doi:10.7554/eLife.63930)
Supplement: Figure 3—figure supplement 3—source data 1. [file elife-63930-fig3-figsupp3-data1.xlsx]

## Sheet: F3FS3
Data for Pre-implantation chimera pie charts
		hESC-ACL
		Typs of contribution	Number of embryos
		No Contribution	48
		Epiblast (GFP+)	0
		Primitive Endoderm (RFP+)	0
		Both Epiblast (GFP+) and Primitive Endoderm (RFP)	0
		Total	48
