# Supplementary material for: An in vitro stem cell model of human epiblast and yolk sac interaction
Source: eLife. 2021 Aug 17;10:e63930. doi: 10.7554/eLife.63930 (PMC8370770; doi:10.7554/eLife.63930)
Supplement: Figure 3—source data 1. [file elife-63930-fig3-data1.xlsx]

## Sheet: F3A
Fluorescence intensity analysis of SOX2, SOX17 and T in RUES2 Rset treated with ACL over a 6 day period using Fiji
Units = fluorescence intensity (a.u.)
Rel [Protein name]= n/control average						2.95907
Exp 1	Average fluorescence intensity (A.U.)	27.1689	1		Average fluorescence intensity (A.U.)		10.5576	0.388592		Average fluorescence intensity (A.U.)	9.97474	0.367138		Average fluorescence intensity (A.U.)	7.89347	0.290533		Average fluorescence intensity (A.U.)	4.95985	4.95985		Average fluorescence intensity (A.U.)	4.33126	0.15942		Average fluorescence intensity (A.U.)	4.55815	0.167771				Exp 2	Average fluorescence intensity (A.U.)	136.554	1		Average fluorescence intensity (A.U.)	65.019	0.476485		Average fluorescence intensity (A.U.)	51.2519	0.375324		Average fluorescence intensity (A.U.)	52.9461	0.387731		Average fluorescence intensity (A.U.)
Day 0	Standard Deviation	11.1704	0.411146	Day 1	Standard Deviation		5.61769	0.206769	Day 2	Standard Deviation	6.25125	0.230089	Day 3	Standard Deviation	5.08099	0.187015	Day 4	Standard Deviation	3.9938	0.146999	Day 5	Standard Deviation	2.9363	0.108076	Day 6	Standard Deviation	3.70014	0.13619				Day 0	Standard Deviation	48.2338	0.353222	Day 1	Standard Deviation	30.6933	0.224771	Day 2	Standard Deviation	29.6892	0.217418	Day 3	Standard Deviation	22.8551	0.167371	Day 4	Standard Deviation
		SOX2	rel SOX2				SOX2	rel SOX2			SOX2	rel SOX2			SOX2	rel SOX2			SOX2	rel SOX2			SOX2	rel SOX2			SOX2	rel SOX2						SOX2	rel SOX2			SOX2	rel SOX2			SOX2	rel SOX2			SOX2	rel SOX2
		8.187	0.301337				8.766	0.322648			6.396	0.235416			11.87	0.436897			11.374	0.41864			8.321	0.306269			11.189	0.411831						43.842	0.321061			26.043	0.190716			26.027	0.190599			39.233	0.287308
		9.754	0.359013				21.934	0.80732			15.775	0.580627			3.145	0.115757			11.729	0.431707			3.096	0.113954			11.158	0.41069						237.058	1.73601			48.078	0.352081			36.529	0.267507			51.286	0.375574
		9.604	0.353492				21.769	0.801247			15.14	0.557255			2.165	0.0796867			11.566	0.425707			5.784	0.21289			10.692	0.393538						202.552	1.48331			54.363	0.398107			83.873	0.614213			64.686	0.473704
		11.39	0.419229				21.113	0.777102			12.707	0.467704			3.014	0.110936			12.091	0.445031			4.265	0.156981			7.792	0.286798						196.552	1.43938			41.569	0.304415			29.757	0.217914			50.722	0.371444
		14.25	0.524497				2.652	0.0976116			22.078	0.81262			2.651	0.0975748			1.956	0.0719941			7.718	0.284075			1.827	0.067246						217.396	1.59202			30.512	0.223443			106.447	0.779525			61.301	0.448915
		8.304	0.305644				18.393	0.676987			13.849	0.509737			2.473	0.0910232			8.76	0.322427			8.104	0.298282			7.729	0.28448						226.304	1.65725			17.43	0.127642			88.064	0.644904			55.184	0.404119
		16.219	0.596969				15.012	0.552543			13.13	0.483273			10.771	0.396446			3.055	0.112445			7.684	0.282823			11.504	0.423425						181.235	1.32721			25.097	0.183789			78.532	0.5751			57.8	0.423277
		15.043	0.553684				14.484	0.533109			12.174	0.448086			13.507	0.497149			12.26	0.451251			12.404	0.456551			9.231	0.339763						193.507	1.41708			17.922	0.131245			103.865	0.760617			104.14	0.762631
		14.277	0.52549				27.16	0.999672			22.212	0.817552			4.241	0.156098			9.808	0.361001			8.106	0.298356			6.501	0.239281						161.748	1.1845			25.377	0.185839			90.304	0.661308			87.422	0.640202
		16.713	0.615152				2.946	0.108433			17.427	0.641432			4.587	0.168833			7.021	0.25842			7.518	0.276713			14.023	0.516142						189.82	1.39008			35.401	0.259246			73.806	0.540491			48.543	0.355487
		14.51	0.534066				20.059	0.738307			6.877	0.25312			5.1	0.187715			14.468	0.532521			5.38	0.198021			10.404	0.382938						221.988	1.62565			9.012	0.065996			70.328	0.515021			44.049	0.322576
		16.437	0.604993				17.131	0.630537			16.909	0.622366			5.071	0.186647			11.463	0.421916			8.741	0.321728			10.573	0.389158						198.268	1.45194			30.635	0.224344			105.794	0.774743			33.098	0.242381
		15.562	0.572787				3.43	0.126247			13.874	0.510657			11.969	0.44054			10.785	0.396961			6.598	0.242851			2.821	0.103832						205.494	1.50486			21.116	0.154635			50.358	0.368778			77.369	0.566583
		16.557	0.60941				3.072	0.11307			11.249	0.41404			2.566	0.0944462			3.04	0.111893			7.512	0.276493			11.188	0.411794						218.389	1.59929			61.192	0.448117			108.679	0.79587			61.544	0.450695
		15.354	0.565131				13.639	0.502008			16.328	0.600981			4.61	0.169679			11.722	0.431449			3.708	0.13648			9.678	0.356216						210.874	1.54426			18.661	0.136657			52.111	0.381616			70.838	0.518756
		12.542	0.461631				14.662	0.539661			13.046	0.480181			3.024	0.111304			10.438	0.384189			10.031	0.369209			13.295	0.489346						177.863	1.30251			65.343	0.478515			71.12	0.520821			22.463	0.164499
		17.454	0.642426				19.976	0.735252			19.367	0.712837			7.384	0.271781			13.873	0.510621			10.077	0.370902			15.038	0.5535						199.271	1.45929			27.974	0.204857			109.395	0.801114			50.474	0.369628
		20.496	0.754392				16.415	0.604183			16.089	0.592184			13.532	0.498069			15.907	0.585486			3.821	0.140639			8.104	0.298282						182.127	1.33374			28.172	0.206307			70.248	0.514435			65.56	0.480104
		18.195	0.669699				17.417	0.641064			14.512	0.53414			9.021	0.332034			8.69	0.319851			5.923	0.218007			10.676	0.392949						194.622	1.42524			37.297	0.273131			41.734	0.305623			46.855	0.343125
		16.305	0.600135				27.319	1.00552			10.883	0.400568			7.954	0.292761			11.29	0.415549			7.591	0.2794			7.967	0.29324						200.834	1.47073			23.251	0.17027			20.614	0.150959			50.04	0.366449
		15.562	0.572787				20.657	0.760318			14.311	0.526742			8.886	0.327065			8.161	0.30038			8.548	0.314624			8.805	0.324084						187.924	1.37619			55.769	0.408404			72.157	0.528415			91.105	0.667174
		17.858	0.657296				20.489	0.754134			13.845	0.50959			7.856	0.289154			9.142	0.336488			7.833	0.288308			6.449	0.237367						136.878	1.00238			55.039	0.403058			49.556	0.362905			54.075	0.395998
		16.909	0.622366				17.212	0.633518			14.251	0.524534			5.558	0.204572			6.665	0.245317			7.659	0.281903			9.193	0.338365						156.013	1.1425			39.912	0.292281			45.618	0.334066			121.755	0.891627
		18.667	0.687072				16.667	0.613459			14.962	0.550703			10.668	0.392655			9.95	0.366228			7.389	0.271965			9.603	0.353456						187.891	1.37595			37.998	0.278264			66.579	0.487567			114.934	0.841676
		18.986	0.698814				22.936	0.8442			15.215	0.560015			8.432	0.310355			9.516	0.350253			7.573	0.278738			12.802	0.4712						174.716	1.27947			44.214	0.323785			46.802	0.342737			43.679	0.319867
		13.319	0.49023				23.692	0.872026			14.504	0.533846			6.937	0.255329			13.321	0.490303			3.854	0.141853			9.46	0.348192						174.359	1.27685			39.544	0.289586			74.479	0.545419			45.632	0.334169
		17.885	0.658289				23.242	0.855463			19.691	0.724762			7.71	0.28378			10.121	0.372521			5.49	0.202069			8.232	0.302993						173.088	1.26755			29.04	0.212664			46.445	0.340123			62.589	0.458347
		16.961	0.62428				8.219	0.302515			16.525	0.608232			8.249	0.303619			8.665	0.318931			7.529	0.277118			8.066	0.296884						201.902	1.47855			50.662	0.371004			94.541	0.692336			48.881	0.357962
		17.629	0.648867				18.241	0.671393			3.17	0.116678			4.94	0.181826			8.449	0.310981			8.332	0.306674			9.899	0.36435						195.188	1.42939			40.134	0.293906			124.927	0.914856			57.038	0.417697
		18.134	0.667454				16.606	0.611213			14.942	0.549967			8.238	0.303214			10.146	0.373442			7.719	0.284112			11.219	0.412935						172.146	1.26065			25.011	0.183159			50.648	0.370902			36.823	0.26966
		14.638	0.538778				3.514	0.129339			7.704	0.283559			4.276	0.157386			11.549	0.425082			6.702	0.246679			5.182	0.190733						156.89	1.14893			51.827	0.379536			23.937	0.175294			60.346	0.441921
		15.867	0.584013				24.105	0.887228			14.731	0.542201			8.667	0.319004			5.453	0.200707			8.835	0.325188			1.87	0.0688287						126.224	0.924354			26.427	0.193528			29.244	0.214158			50.368	0.368851
		21.861	0.804633				16.7	0.614673			12.166	0.447791			6.877	0.25312			1.943	0.0715156			7.378	0.27156			8.617	0.317164						217.25	1.59095			36.735	0.269015			35.835	0.262424			59.327	0.434459
		15.639	0.575621				40.991	1.50875			5.508	0.202732			7.236	0.266334			8.95	0.329421			8.764	0.322575			7.218	0.265671						187.755	1.37495			28.694	0.21013			26.642	0.195103			46.47	0.340306
		20.101	0.739853				19.764	0.727449			18.932	0.696826			6.991	0.257316			7.712	0.283854			8.695	0.320035			3.476	0.12794						169.141	1.23864			42.461	0.310947			25.995	0.190365			44.954	0.329204
		19.344	0.71199				11.981	0.440982			12.471	0.459017			16.411	0.604036			3.564	0.131179			7.928	0.291804			10.079	0.370976						141.852	1.0388			43.272	0.316886			42.68	0.312551			65.062	0.476457
		17.68	0.650744				3.489	0.128419			13.458	0.495346			10.03	0.369172			13.001	0.478525			7.054	0.259635			13.915	0.512166						169.319	1.23994			25.771	0.188724			32.71	0.23954			56.005	0.410132
		15.873	0.584234				6.341	0.233392			13.112	0.482611			5.863	0.215798			2.531	0.093158			10.035	0.369356			2.41	0.0887044						147.483	1.08004			73.212	0.536141			24.643	0.180464			43.736	0.320284
		17.98	0.661786				1.052	0.0387207			19.58	0.720677			10.289	0.378705			9.991	0.367737			8.494	0.312637			11.047	0.406605						190.465	1.3948			31.614	0.231513			3.016	0.0220866			43.507	0.318607
		14.279	0.525564				14.082	0.518313			14.236	0.523981			3.981	0.146528			11.853	0.436271			9.168	0.337445			9.344	0.343923						156.591	1.14674			53.569	0.392293			27.825	0.203766			39.509	0.289329
		13.708	0.504547				19.852	0.730688			16.818	0.619017			9.978	0.367258			11.882	0.437338			7.658	0.281866			11.429	0.420665						145.136	1.06285			47.112	0.345007			24.47	0.179197			41.786	0.306004
		16.736	0.615998				9.777	0.35986			5.489	0.202032			4.604	0.169458			4.963	0.182672			5.648	0.207885			4.872	0.179323						171.591	1.25658			52.834	0.38691			37.635	0.275606			43.465	0.3183
		14.736	0.542385				5.31	0.195444			16.643	0.612575			8.918	0.328243			3.167	0.116567			5.303	0.195186			3.069	0.11296						196.725	1.44064			47.552	0.348229			36.652	0.268407			45.434	0.332719
		10.952	0.403108				6.231	0.229343			18.507	0.681183			5.479	0.201664			2.477	0.0911704			8.573	0.315545			2.379	0.0875633						186.243	1.36388			29.824	0.218405			27.946	0.204652			42.843	0.313745
		15.989	0.588504				4.907	0.180611			14.809	0.545072			4.904	0.1805			3.51	0.129192			4.071	0.14984			3.404	0.12529						162.347	1.18889			25.144	0.184133			24.171	0.177007			46.623	0.341426
		15.855	0.583572				20.365	0.74957			23.081	0.849537			12.034	0.442933			2.663	0.0980165			4.814	0.177188			2.56	0.0942254						178.861	1.30982			58.412	0.427759			37.576	0.275174			42.808	0.313488
		17.827	0.656155				5.226	0.192352			15.378	0.566015			6.645	0.244581			3.466	0.127572			5.355	0.1971			3.351	0.12334						183.736	1.34552			42.626	0.312156			30.006	0.219738			20.105	0.147231
		11.314	0.416432				5.834	0.214731			9.535	0.350953			5.731	0.21094			2.265	0.0833674			7.253	0.26696			2.289	0.0842507						123.235	0.902466			28.578	0.20928			56.385	0.412915			48.309	0.353773
		15.288	0.562702				5.398	0.198683			12.045	0.443338			9.061	0.333506			6.507	0.239502			7.431	0.273511			6.115	0.225073						163.859	1.19996			45.025	0.329724			37.993	0.278228			21.166	0.155001
		17.445	0.642094				5.097	0.187604			11.789	0.433915			14.703	0.54117			2.825	0.103979			9.685	0.356474			2.675	0.0984582						193.586	1.41766			43.081	0.315488			33.816	0.247639			59.085	0.432687
		15.65	0.576026				25.311	0.931617			17.857	0.657259			12.621	0.464538			8.165	0.300527			5.608	0.206412			7.944	0.292393						158.398	1.15997			51.191	0.374878			57.423	0.420516			49.376	0.361587
		14.13	0.52008				20.722	0.76271			12.981	0.477789			17.657	0.649897			3.751	0.138062			9.022	0.332071			3.571	0.131437						171.702	1.2574			39.333	0.288041			82.218	0.602093			54.807	0.401359
		16.52	0.608048				6.01	0.221209			12.098	0.445288			13.959	0.513786			3.479	0.128051			4.116	0.151497			3.457	0.127241						181.785	1.33123			39.565	0.28974			33.971	0.248774			48.975	0.35865
		8.677	0.319372				7.066	0.260077			15.942	0.586774			12.572	0.462735			3.293	0.121205			9.313	0.342782			3.243	0.119364						169.086	1.23824			48.257	0.353392			45.584	0.333817			46.395	0.339757
		12.614	0.464281				4.422	0.16276			11.945	0.439657			8.984	0.330672			4.013	0.147706			5.677	0.208952			3.922	0.144356						172.454	1.2629			45.201	0.331013			28.658	0.209866			62.36	0.45667
		14.603	0.537489				10.966	0.403623			17.768	0.653983			13.259	0.488021			3.354	0.12345			8.414	0.309692			3.24	0.119254						164.819	1.20699			29.451	0.215673			26.809	0.196326			45.042	0.329848
		15.947	0.586958				1.585	0.0583388			15.927	0.586222			16.427	0.604625			7.148	0.263095			5.724	0.210682			6.946	0.25566						157.405	1.1527			50.261	0.368068			28.999	0.212363			50.69	0.371209
		10.518	0.387134				14.288	0.525895			12	0.441681			9.529	0.350732			3.108	0.114395			5.877	0.216313			3.117	0.114727						191.438	1.40192			45.514	0.333305			18.74	0.137235			9.729	0.0712467
		13.076	0.481286				5.255	0.19342			18.129	0.66727			6.49	0.238876			2.913	0.107218			6.03	0.221945			2.824	0.103942						171.887	1.25875			28.987	0.212276			44.331	0.324642			71.213	0.521502
		15.182	0.558801				5.234	0.192647			6.918	0.254629			9.733	0.35824			2.92	0.107476			4.608	0.169606			2.537	0.0933788						190.055	1.3918			28.142	0.206087			31.622	0.231572			43.933	0.321727
		12.078	0.444552				8.194	0.301595			16.757	0.616771			16.418	0.604294			3.046	0.112113			5.257	0.193493			2.848	0.104826						174.016	1.27434			39.003	0.285624			81.233	0.59488			66.929	0.49013
		14.357	0.528435				9.294	0.342082			16.618	0.611655			10.719	0.394532			2.714	0.0998936			9.077	0.334095			2.966	0.109169						223.628	1.63766			60.679	0.44436			39.621	0.29015			56.701	0.415229
		14.787	0.544262				8.03	0.295558			11.997	0.441571			8.905	0.327764			3.918	0.144209			8.539	0.314293			3.829	0.140933						159.008	1.16444			31.027	0.227215			32.578	0.238573			64.482	0.47221
		9.785	0.360154				10.298	0.379036			14.228	0.523687			5.568	0.20494			2.655	0.097722			6.43	0.236668			2.48	0.0912808						156.571	1.14659			49.35	0.361396			47.546	0.348185			52.956	0.387804
		13.955	0.513639				19.635	0.722701			15.814	0.582063			9.649	0.355149			2.196	0.0808277			7.514	0.276566			1.972	0.072583						157.132	1.1507			29.051	0.212744			44.657	0.327029			38.392	0.28115
		10.713	0.394311				11.794	0.434099			24.29	0.894037			0.985	0.0362547			3.323	0.122309			5.017	0.18466			3.171	0.116714						197.15	1.44375			66.757	0.48887			36.195	0.265061			18.164	0.133017
		32.045	1.17947				9.525	0.350585			5.122	0.188524			5.32	0.195812			3.377	0.124297			5.33	0.19618			3.774	0.138909						169.604	1.24203			41.719	0.305514			35.154	0.257437			64.246	0.470482
		16.815	0.618906				8.296	0.305349			15.113	0.556261			42.749	1.57345			3.924	0.14443			7.663	0.28205			3.968	0.146049						187.652	1.3742			28.184	0.206395			36.417	0.266686			30.093	0.220375
		12.342	0.454269				10.652	0.392066			14.982	0.551439			5.008	0.184328			4.081	0.150208			9.217	0.339248			5.486	0.201922						197.565	1.44679			28.98	0.212224			30.822	0.225713			53.966	0.3952
		11.564	0.425634				7.344	0.270309			15.745	0.579523			2.905	0.106924			5.588	0.205676			7.369	0.271229			3.983	0.146601						170.998	1.25224			40.766	0.298535			33.087	0.2423			22.283	0.163181
		12.95	0.476648				14.991	0.551771			13.073	0.481175			3.058	0.112555			4.192	0.154294			5.556	0.204499			4.646	0.171004						149.786	1.0969			44.136	0.323214			39.572	0.289791			60.885	0.445869
		11.162	0.410837				5.113	0.188193			6.783	0.24966			5.44	0.200229			4.584	0.168722			5.817	0.214105			5.394	0.198536						223.149	1.63415			14.494	0.106141			38.958	0.285294			13.16	0.0963724
		14.568	0.536201				9.615	0.353897			12.849	0.47293			5.216	0.191984			4.985	0.183482			6.166	0.226951			4.866	0.179102						202.459	1.48263			58.345	0.427268			33.236	0.243391			22.837	0.167238
		42.031	1.54703				12.289	0.452319			11.705	0.430823			5.148	0.189481			3.835	0.141154			6.214	0.228717			3.659	0.134676						196.8	1.44119			56.116	0.410945			42.861	0.313877			42.001	0.307579
		29.126	1.07203				6.9	0.253967			39.964	1.47095			4.218	0.155251			5.82	0.214215			11.413	0.420076			5.496	0.20229						228.27	1.67165			53.547	0.392132			52.53	0.384684			18.907	0.138458
		10.589	0.389747				8.73	0.321323			18.462	0.679527			4.432	0.163128			4.327	0.159263			5.902	0.217234			4.261	0.156834						146.811	1.07512			34.168	0.250217			36.91	0.270297			56.052	0.410476
		50.144	1.84564				17.221	0.63385			44.681	1.64456			4.528	0.166661			13.651	0.502449			5.452	0.200671			12.558	0.46222						223.595	1.63741			31.489	0.230598			35.367	0.258997			47.761	0.34976
		20.609	0.758551				15.615	0.574738			18.411	0.67765			6.273	0.230889			1.371	0.0504621			7.281	0.26799			1.409	0.0518608						208.805	1.52911			24.287	0.177857			33.021	0.241817			40.438	0.296133
		14.987	0.551623				8.547	0.314588			15.893	0.58497			4.795	0.176489			14.215	0.523208			8.525	0.313778			13.167	0.484635						192.173	1.40731			31.845	0.233205			37.918	0.277678			55.627	0.407364
		21.43	0.788769				14.837	0.546102			10.53	0.387575			4.301	0.158306			2.977	0.109574			12.045	0.443338			2.65	0.097538						142.194	1.0413			65.947	0.482938			32.392	0.237211			52.215	0.382377
		37.431	1.37771				13.802	0.508007			19.514	0.718248			7.691	0.283081			4.768	0.175495			12.594	0.463545			4.62	0.170047						187.658	1.37424			56.05	0.410461			89.4	0.654688			45.324	0.331913
		34.211	1.2592				7.534	0.277302			10.836	0.398838			4.688	0.17255			4.596	0.169164			11.253	0.414187			2.708	0.0996728						177.08	1.29678			44.068	0.322716			31.033	0.227259			52.259	0.382699
		33.186	1.22147				14.485	0.533146			8.485	0.312306			4.991	0.183703			2.978	0.109611			8.696	0.320072			4.437	0.163312						200.199	1.46608			36.06	0.264072			35.713	0.261531			50.248	0.367973
		23.267	0.856383				12.282	0.452061			5.679	0.209026			3.959	0.145718			1.778	0.0654425			8.341	0.307005			2.83	0.104163						129.168	0.945914			38.519	0.28208			29.63	0.216984			41.533	0.304151
		41.453	1.52575				11.964	0.440356			7.177	0.264162			2.922	0.107549			3.314	0.121978			5.99	0.220473			2.035	0.0749018						212.592	1.55684			80.543	0.589827			27.39	0.20058			46.787	0.342627
		32.537	1.19758				9.824	0.36159			6.263	0.230521			1.792	0.0659578			3.117	0.114727			5.53	0.203542			1.619	0.0595902						203.826	1.49264			63.978	0.468519			29.307	0.214619			33.898	0.248239
		42.827	1.57632				15.32	0.56388			4.576	0.168428			6.942	0.255513			4.074	0.149951			9.706	0.357247			3.199	0.117745						198.568	1.45414			72.481	0.530788			31.317	0.229338			47.116	0.345036
		44.974	1.65535				4.943	0.181936			7.042	0.259193			3.369	0.124002			2.73	0.100483			5.501	0.202474			2.846	0.104752						188.689	1.38179			22.365	0.163782			24.494	0.179373			47.037	0.344458
		36.066	1.32747				13.162	0.484451			7.544	0.27767			1.802	0.0663258			2.356	0.0867168			4.963	0.182672			2.647	0.0974276						111.499	0.816521			23.74	0.173851			55.443	0.406016			26.166	0.191617
		37.495	1.38007				12.62	0.464502			5.299	0.195039			7.785	0.286541			3.824	0.140749			10.089	0.371344			3.946	0.14524						129.79	0.950469			49.209	0.360364			29.089	0.213022			60.458	0.442742
		27.065	0.996176				14.406	0.530239			4.607	0.169569			1.554	0.0571977			3.944	0.145166			10.924	0.402077			3.3	0.121462						169.209	1.23914			23.346	0.170966			32.865	0.240675			60.07	0.4399
		30.605	1.12647				9.285	0.341751			5.853	0.21543			6.067	0.223307			2.538	0.0934156			6.729	0.247673			2.143	0.0788769						209.57	1.53471			44.002	0.322232			34.754	0.254508			52.401	0.383739
		36.935	1.35946				10.578	0.389342			6.128	0.225552			7.815	0.287645			2.309	0.0849869			7.648	0.281498			3.405	0.125327						113.221	0.829132			53.888	0.394629			35.151	0.257415			49.954	0.36582
		28.422	1.04612				8.407	0.309435			6.087	0.224043			3.13	0.115205			2.883	0.106114			7.964	0.293129			2.905	0.106924						198.798	1.45582			65.957	0.483012			28.367	0.207735			49.531	0.362722
		22.619	0.832533				8.349	0.3073			5.239	0.192831			11.872	0.43697			2.811	0.103464			10.808	0.397808			3.147	0.115831						131.529	0.963204			50.78	0.371868			30.245	0.221488			52.498	0.38445
		45.886	1.68892				12.084	0.444773			8.497	0.312747			13.918	0.512277			3.416	0.125732			9.379	0.345211			2.469	0.090876						188.084	1.37736			22.721	0.166389			31.869	0.233381			51.643	0.378188
		38.242	1.40757				7.74	0.284885			10.872	0.400163			4.418	0.162612			2.822	0.103869			1.488	0.0547685			2.25	0.0828153						97.982	0.717535			22.763	0.166696			36.294	0.265786			43.246	0.316696
		43.833	1.61335				7.735	0.2847			4.504	0.165778			6.115	0.225073			1.424	0.0524129			1.18	0.043432			2.72	0.100114						176.217	1.29046			20.939	0.153339			32.828	0.240404			24.148	0.176839
		25.448	0.936659				15.157	0.55788			10.628	0.391183			12.501	0.460122			1.439	0.052965			0.74	0.027237			2.719	0.100078						103.686	0.759306			54.561	0.399557			25.934	0.189918			62.092	0.454708
		28.465	1.04771				8.689	0.319814			3.072	0.11307			10.858	0.399648			2.705	0.0995624			0.875	0.0322059			1.318	0.0485113						198.905	1.45661			22.568	0.165268			27.867	0.204074			22.955	0.168102
		43.495	1.60091				13.955	0.513639			9.44	0.347456			5.752	0.211713			3.18	0.117046			0.985	0.0362547			1.419	0.0522288						128.308	0.939616			61.114	0.447546			42.556	0.311643			42.331	0.309995
		45.064	1.65866				14.45	0.531858			8.092	0.297841			5.649	0.207922			3.046	0.112113			1.773	0.0652584			1.432	0.0527073						146.521	1.07299			25.43	0.186227			28.66	0.209881			47.228	0.345857
		38.428	1.41441				8.1	0.298135			10.341	0.380619			4.355	0.160294			4.678	0.172182			5.128	0.188745			2.524	0.0929003						146.021	1.06933			28.151	0.206153			34.028	0.249191			13.872	0.101586
		37.119	1.36623				7.376	0.271487			9.773	0.359713			7.517	0.276677			4.754	0.174979			5.839	0.214915			2.977	0.109574						135.683	0.993624			24.922	0.182507			33.092	0.242337			93.78	0.686763
		37.471	1.37919				16.547	0.609042			3.531	0.129965			3.819	0.140565			4.045	0.148883			3.199	0.117745			2.726	0.100335						152.766	1.11872			68.064	0.498441			32.504	0.238031			46.216	0.338446
		35.097	1.29181				8.791	0.323568			10.222	0.376239			9.807	0.360964			2.363	0.0869744			1.928	0.0709635			2.148	0.079061						180.994	1.32544			15.6	0.114241			13.754	0.100722			37.059	0.271388
		35.396	1.30281				7.98	0.293718			10.676	0.392949			10.605	0.390336			2.222	0.0817847			5.002	0.184108			2.888	0.106298						130.544	0.95599			28.141	0.20608			29.506	0.216076			47.395	0.34708
		39.384	1.4496				8.431	0.310318			8.247	0.303546			3.578	0.131695			4.456	0.164011			2.665	0.0980901			2.394	0.0881154						213.094	1.56051			46.201	0.338336			32.159	0.235504			37.685	0.275972
		34.317	1.2631				7.716	0.284001			7.735	0.2847			4.695	0.172808			1.895	0.0697489			1.944	0.0715524			4.55	0.167471						154.994	1.13504			32.171	0.235592			67.829	0.49672			80.039	0.586136
		36.015	1.3256				4.447	0.16368			9.249	0.340426			3.541	0.130333			0.742	0.0273106			4.018	0.14789			5.917	0.217786						161.232	1.18072			30.783	0.225428			34.037	0.249257			45.693	0.334616
		26.609	0.979392				15.106	0.556003			10.255	0.377454			2.396	0.0881891			3.129	0.115168			1.632	0.0600687			3.954	0.145534						143.21	1.04875			23.278	0.170468			30.501	0.223363			12.793	0.0936848
		29.418	1.08278				4.368	0.160772			6.99	0.257279			8.09	0.297767			2.416	0.0889252			2.937	0.108102			4.052	0.149141						137.335	1.00572			23.971	0.175543			27.475	0.201203			66.674	0.488262
		32.593	1.19964				2.273	0.0836618			3.287	0.120984			5.264	0.193751			2.612	0.0961393			3.28	0.120726			2.202	0.0810485						164.189	1.20238			28.979	0.212217			32.544	0.238324			16.991	0.124427
		36.17	1.3313				5.911	0.217565			8.338	0.306895			7.991	0.294123			5.011	0.184439			3.198	0.117708			1.944	0.0715524						170.191	1.24633			44.904	0.328838			30.57	0.223868			48.55	0.355538
		36.558	1.34558				5.123	0.188561			9.437	0.347346			4.256	0.15665			1.824	0.0671356			3.206	0.118003			1.767	0.0650376						149.507	1.09486			25.352	0.185656			33.619	0.246196			32.376	0.237094
		31.117	1.14532				5.032	0.185212			9.054	0.333249			7.255	0.267033			3.491	0.128492			3.968	0.146049			0.738	0.0271634						186.584	1.36638			22.395	0.164001			21.995	0.161072			44.783	0.327952
		44.57	1.64048				1.764	0.0649272			10.54	0.387944			4.213	0.155067			2.846	0.104752			1.829	0.0673196			2.148	0.079061						193.352	1.41594			32.142	0.23538			38.544	0.282263			36.912	0.270311
		32.232	1.18636				8.387	0.308699			8.465	0.311569			7.173	0.264015			2.669	0.0982373			1.541	0.0567193			2.934	0.107991						173.473	1.27036			38.413	0.281303			36.472	0.267089			30.173	0.220961
		37.654	1.38592				15.71	0.578235			7.125	0.262248			4.455	0.163974			4.685	0.17244			3.475	0.127904			2.311	0.0850605						165.439	1.21153			33.392	0.244534			27.418	0.200786			26.857	0.196677
		47.513	1.7488				10.33	0.380214			3.945	0.145203			6.631	0.244066			5.046	0.185727			4.066	0.149656			4.858	0.178807						192.26	1.40794			33.413	0.244688			28.702	0.210188			23.233	0.170138
		29.53	1.0869				7.553	0.278002			21.081	0.775924			5.068	0.186537			2.317	0.0852813			4.442	0.163496			3.307	0.12172						139.426	1.02103			38.411	0.281289			16.202	0.118649			25.155	0.184213
		35.931	1.3225				6.117	0.225147			2.89	0.106372			7.568	0.278554			1.21	0.0445362			4.046	0.14892			1.13	0.0415917						133.958	0.980992			61.265	0.448651			39.039	0.285888			24.325	0.178135
		29.568	1.0883				17.137	0.630758			2.849	0.104863			4.222	0.155398			2.728	0.100409			2.66	0.097906			2.689	0.0989734						200.453	1.46794			42.638	0.312244			41.59	0.304569			42.615	0.312075
		29.192	1.07446				16.751	0.61655			5.22	0.192131			3.819	0.140565			11.454	0.421585			1.294	0.047628			2.517	0.0926427						190.48	1.39491			38.197	0.279722			28.796	0.210877			53.845	0.394314
		19.093	0.702752				13.959	0.513786			6.239	0.229638			4.39	0.161582			3.198	0.117708			1.263	0.046487			1.083	0.0398617						214.754	1.57267			32.242	0.236112			39.341	0.288099			21.946	0.160713
		12.376	0.455521				9.392	0.345689			2.999	0.110384			5.226	0.192352			2.238	0.0823736			3.088	0.113659			2.504	0.0921642						166.907	1.22228			11.6	0.0849483			28.494	0.208665			66.916	0.490034
		25.479	0.9378				8.658	0.318673			14.002	0.515369			6.428	0.236594			2.409	0.0886675			2.177	0.0801284			4.638	0.17071						188.669	1.38165			16.631	0.121791			36.078	0.264204			58.377	0.427502
		31.354	1.15404				8.608	0.316833			7.094	0.261107			2.275	0.0837354			2.788	0.102617			1.533	0.0564248			1.941	0.071442						129.619	0.949217			51.068	0.373977			27.153	0.198845			51.547	0.377485
		24.124	0.887927				15.882	0.584565			5.944	0.21878			5.379	0.197984			2.049	0.0754171			3.192	0.117487			2.193	0.0807173						214.119	1.56802			84.527	0.619002			33.866	0.248005			55.572	0.406961
		34.558	1.27197				3.613	0.132983			28.031	1.03173			7.27	0.267585			3.563	0.131143			3.366	0.123892			1.222	0.0449779						174.158	1.27538			95.447	0.698971			34.51	0.252721			117.658	0.861625
		41.008	1.50937				10.02	0.368804			6.781	0.249587			4.377	0.161103			2.581	0.0949983			3.187	0.117303			2.536	0.093342						181.725	1.3308			8.97	0.0656885			36.644	0.268349			62.488	0.457608
		41.72	1.53558				12.139	0.446798			3.646	0.134198			5.866	0.215909			2.391	0.088005			3.318	0.122125			10.851	0.39939						140.259	1.02713			94.317	0.690695			29.888	0.218874			30.633	0.224329
		44.987	1.65583				15.955	0.587252			7.775	0.286173			6.012	0.221282			3.765	0.138578			2.273	0.0836618			5.02	0.18477						160.755	1.17723			76.471	0.560007			32.447	0.237614			51.967	0.380561
		27.917	1.02754				9.495	0.34948			19.441	0.715561			3.742	0.137731			2.366	0.0870849			1.835	0.0675405			2.999	0.110384						139.598	1.02229			127.436	0.93323			35.983	0.263508			38.959	0.285302
		40.436	1.48832				7.611	0.280136			7.83	0.288197			4.864	0.179028			2.056	0.0756748			2.693	0.0991207			2.104	0.0774415						166.61	1.22011			54.818	0.401439			42.86	0.313869			42.222	0.309197
		22.798	0.839121				4.589	0.168906			7.184	0.26442			5.299	0.195039			2.567	0.094483			2.223	0.0818215			2.285	0.0841035						148.868	1.09018			46.589	0.341177			27.192	0.19913			58.363	0.4274
		30.381	1.11823				9.363	0.344622			5.43	0.199861			5.821	0.214252			1.22	0.0449043			3.882	0.142884			2.668	0.0982005						188.938	1.38362			95.947	0.702632			33.688	0.246702			16.843	0.123343
		30.73	1.13107				10.332	0.380288			6.652	0.244839			2.719	0.100078			3.182	0.117119			2.937	0.108102			3.341	0.122971						159.948	1.17132			73.549	0.538609			28.484	0.208592			64.997	0.475981
		32.039	1.17925				9.048	0.333028			32.987	1.21415			10.164	0.374104			3.242	0.119328			3.54	0.130296			2.017	0.0742393						188.607	1.38119			29.496	0.216003			48.236	0.353238			36.025	0.263816
		17.125	0.630316				13.462	0.495493			3.696	0.136038			24.599	0.90541			1.925	0.0708531			3.895	0.143362			2.488	0.0915753						181.297	1.32766			15.75	0.115339			27.598	0.202104			45.928	0.336337
		35.46	1.30517				3.627	0.133498			5.032	0.185212			16.825	0.619274			2.469	0.090876			2.5	0.092017			2.295	0.0844716						190.956	1.3984			105.963	0.775981			43.991	0.322152			126.104	0.923476
		34.72	1.27793				3.729	0.137253			3.128	0.115132			2.909	0.107071			1.039	0.0382423			3.45	0.126983			3.554	0.130811						189.165	1.38528			140.638	1.02991			42.585	0.311855			124.949	0.915017
		29.322	1.07925				6.402	0.235637			20.253	0.745448			8.025	0.295374			1.799	0.0662154			3.536	0.130149			2.294	0.0844348						196.091	1.436			63.505	0.465055			27.095	0.19842			143.205	1.04871
		39.987	1.47179				9.967	0.366853			4.512	0.166072			10.838	0.398912			2.617	0.0963234			3.384	0.124554			2.44	0.0898086						159.956	1.17138			99.713	0.730211			26.173	0.191668			48.608	0.355963
		40.563	1.49299				15.079	0.55501			5.857	0.215577			9.54	0.351137			1.911	0.0703378			4.311	0.158674			1.945	0.0715892						189.498	1.38772			41.436	0.303441			44.506	0.325923			47.944	0.3511
		26.153	0.962608				11.124	0.409439			4.689	0.172587			9.77	0.359602			2.687	0.0988998			3.421	0.125916			1.259	0.0463397						138.05	1.01096			45.464	0.332939			58.744	0.43019			36.933	0.270465
		32.684	1.20299				13.733	0.505468			3.295	0.121278			9.013	0.33174			3.11	0.114469			3.371	0.124076			3.137	0.115463						190.907	1.39804			113.764	0.833108			34.12	0.249865			48.864	0.357837
		26.021	0.957749				5.239	0.192831			5.387	0.198278			2.531	0.093158			2.912	0.107181			1.768	0.0650744			3.092	0.113807						41.488	0.303822			143.12	1.04809			42.762	0.313152			52.024	0.380978
		25.14	0.925323				7.655	0.281756			4.635	0.170599			10.944	0.402813			1.831	0.0673932			3.598	0.132431			1.851	0.0681294						239.425	1.75334			143.323	1.04957			23.664	0.173294			53.508	0.391846
		38.918	1.43245				13.307	0.489788			8.308	0.305791			2.623	0.0965442			3.273	0.120469			6.725	0.247526			2.884	0.106151						206.647	1.5133			99.27	0.726967			23.12	0.169311			44.715	0.327454
		32.943	1.21253				14.357	0.528435			5.584	0.205529			11.059	0.407046			2.511	0.0924218			3.381	0.124444			2.611	0.0961025						189.356	1.38668			20.38	0.149245			32.569	0.238507			51.268	0.375442
		34.935	1.28585				8.549	0.314661			4.731	0.174133			5.629	0.207185			1.854	0.0682398			3.24	0.119254			1.679	0.0617986						219.022	1.60393			118.888	0.870632			34.564	0.253117			49.88	0.365278
		42.176	1.55236				8.506	0.313079			4.556	0.167692			14.217	0.523282			2.305	0.0848396			2.818	0.103722			1.029	0.0378742						225.01	1.64778			97.788	0.716114			52.843	0.386976			54.304	0.397675
		46.889	1.72583				15.566	0.572934			7.49	0.275683			9.873	0.363393			2.06	0.075822			4.388	0.161508			1.757	0.0646695						184.117	1.34831			90.239	0.660832			57.782	0.423145			49.227	0.360496
		38.929	1.43285				13.432	0.494389			5.272	0.194045			16.143	0.594172			2.466	0.0907655			4.3	0.158269			2.488	0.0915753						194.688	1.42573			116.32	0.851826			39.846	0.291797			58.635	0.429392
		18.68	0.687551				19.558	0.719867			5.856	0.215541			16.484	0.606723			3.337	0.122824			4.702	0.173066			1.731	0.0637125						177.661	1.30103			80.827	0.591906			41.99	0.307498			57.635	0.422068
		32.893	1.21069				11.122	0.409365			4.256	0.15665			4.592	0.169017			2.705	0.0995624			3.022	0.11123			2.77	0.101955						186.466	1.36551			36.319	0.265969			38.299	0.280468			55.513	0.406529
		26.872	0.989072				12.642	0.465311			4.384	0.161361			16.499	0.607275			4.088	0.150466			2.15	0.0791346			1.566	0.0576394						226.605	1.65946			82.696	0.605593			19.791	0.144932			38.377	0.28104
		43.118	1.58703				10.662	0.392434			4.364	0.160625			9.736	0.358351			2.47	0.0909128			1.187	0.0436897			3.087	0.113623						202.292	1.48141			75.71	0.554434			79.332	0.580958			45.479	0.333049
		31.872	1.17311				1.266	0.0465974			3.461	0.127388			14.861	0.546986			2.459	0.0905079			6.108	0.224816			2.373	0.0873425						209.177	1.53183			87.545	0.641103			40.252	0.294771			31.625	0.231594
		47.8	1.75936				7.779	0.28632			5.583	0.205492			17.556	0.64618			4.075	0.149988			3.011	0.110825			1.789	0.0658473						218.664	1.6013			76.326	0.558945			79.975	0.585667			39.526	0.289454
		43.208	1.59035				8.152	0.300049			5.454	0.200744			13.094	0.481948			2.792	0.102765			2.707	0.099636			2.2	0.0809749						213.567	1.56398			107.134	0.784556			48.675	0.356453			54.143	0.396496
		36.56	1.34566				10.813	0.397992			4.064	0.149583			12.352	0.454637			2.794	0.102838			1.732	0.0637494			1.866	0.0686815						208.595	1.52757			90.522	0.662904			62.01	0.454107			50.779	0.371861
		33.721	1.24116				10.376	0.381907			4.341	0.159778			12.378	0.455594			2.516	0.0926059			1.953	0.0718837			2.312	0.0850973						178.771	1.30916			92.172	0.674987			49.15	0.359932			34.899	0.25557
		22.878	0.842066				15.913	0.585706			9.901	0.364424			3.047	0.11215			2.438	0.0897349			2.233	0.0821896			3.447	0.126873						203.254	1.48846			63.999	0.468673			44.371	0.324935			9.286	0.0680026
		26.907	0.99036				13.186	0.485334			9.969	0.366927			3.285	0.12091			2.988	0.109979			2.332	0.0858334			2.465	0.0907287						184.564	1.35159			77.9	0.570472			53.455	0.391458			40.203	0.294412
		37.455	1.3786				10.514	0.386987			4.164	0.153263			3.537	0.130186			2.301	0.0846924			2.551	0.0938941			2.352	0.0865696						196.683	1.44033			65.454	0.479328			48.083	0.352118			22.857	0.167385
		31.267	1.15084				17.942	0.660387			4.579	0.168538			5.718	0.210461			2.954	0.108727			3.676	0.135302			2.267	0.083441						204.798	1.49976			89.138	0.652769			45.784	0.335282			39.363	0.28826
		40.191	1.4793				14.848	0.546507			3.431	0.126284			2.414	0.0888516			1.455	0.0535539			2.831	0.1042			3.868	0.142369						190.705	1.39656			57.67	0.422325			93.833	0.687151			49.176	0.360122
		36.195	1.33222				12.673	0.466452			7.247	0.266739			3.469	0.127683			3.405	0.125327			3.282	0.1208			2.639	0.0971331						137.671	1.00818			100.083	0.732921			51.04	0.373772			59.554	0.436122
		36.821	1.35526				9.411	0.346389			3.956	0.145608			5.01	0.184402			2.896	0.106592			2.805	0.103243			2.587	0.0952192						155.975	1.14222			78.964	0.578263			34.593	0.253329			70.711	0.517826
		30.518	1.12327				10.414	0.383306			4.234	0.15584			4.685	0.17244			2.764	0.101734			2.594	0.0954768			2.392	0.0880418						190.293	1.39354			110.826	0.811593			68.319	0.500309			63.051	0.461731
		39.559	1.45604				15.575	0.573266			9.012	0.331703			2.549	0.0938205			2.234	0.0822264			3.539	0.130259			2.37	0.0872321						178.396	1.30642			73.453	0.537906			79.987	0.585755			65.809	0.481928
		48.909	1.80018				15.391	0.566493			12.797	0.471016			6.038	0.222239			4.728	0.174022			5.967	0.219626			2.817	0.103685						176.554	1.29293			14.255	0.104391			86.754	0.635311			41.215	0.301823
		55.707	2.0504				16.422	0.604441			8.616	0.317127			6.317	0.232508			3.409	0.125474			2.928	0.10777			2.642	0.0972435						171.897	1.25882			76.882	0.563017			72.961	0.534303			38.767	0.283896
		39.653	1.4595				13.376	0.492328			11.037	0.406236			6.699	0.246569			2.638	0.0970963			3.099	0.114064			2.224	0.0818583						194.989	1.42793			61.913	0.453397			45.608	0.333993			46.921	0.343608
		39.395	1.45				12.986	0.477973			10.582	0.389489			10.802	0.397587			3.662	0.134786			3.388	0.124701			1.596	0.0587436						204.345	1.49644			73.089	0.53524			35.776	0.261992			70.419	0.515687
		42.169	1.55211				17.754	0.653468			3.021	0.111193			4.5	0.165631			2.571	0.0946302			3.304	0.12161			3.289	0.121058						174.153	1.27534			84.492	0.618746			87.413	0.640137			49.479	0.362341
		29.551	1.08768				15.466	0.569254			10.147	0.373478			7.73	0.284516			2.959	0.108911			3.267	0.120248			2.683	0.0987526						158.911	1.16373			67.454	0.493974			55.198	0.404222			58.033	0.424983
		34.789	1.28047				6.833	0.251501			3.596	0.132357			6.818	0.250949			3.541	0.130333			3.329	0.12253			1.109	0.0408187						127.291	0.932168			65.632	0.480632			79.671	0.583441			102.775	0.752634
		41.77	1.53742				16.423	0.604478			1.337	0.0492107			7.804	0.28724			2.845	0.104715			8.672	0.319188			2.532	0.0931948						220.175	1.61237			37.782	0.276682			60.826	0.445437			79.08	0.579113
		39.526	1.45483				16.696	0.614526			2.751	0.101255			4.578	0.168501			2.786	0.102544			1.321	0.0486218			2.08	0.0765581						170.369	1.24763			87.447	0.640386			65.618	0.480529			40.906	0.29956
		36.514	1.34396				10.148	0.373515			2.91	0.107108			8.984	0.330672			2.732	0.100556			7.264	0.267364			3.764	0.138541						169.8	1.24347			58.054	0.425137			76.519	0.560358			79.418	0.581588
		34.171	1.25772				7.992	0.29416			13.041	0.479997			9.643	0.354928			4.856	0.178734			3.262	0.120064			3.398	0.125069						141.323	1.03493			68.077	0.498537			45.637	0.334206			81.981	0.600357
		26.279	0.967246				15.363	0.565463			9.41	0.346352			10.105	0.371933			2.722	0.100188			2.61	0.0960657			1.148	0.0422542						170.224	1.24657			97.798	0.716187			91.141	0.667437			119.8	0.877311
		36.389	1.33936				13.505	0.497076			8.896	0.327433			9.743	0.358609			2.67	0.0982741			3.116	0.11469			2.523	0.0928635						148.074	1.08436			70.959	0.519642			56.218	0.411692			33.941	0.248554
		13.885	0.511062				3.717	0.136811			4.352	0.160183			6.28	0.231147			2.818	0.103722			1.339	0.0492843			2.76	0.101587						192.573	1.41024			106.512	0.780001			104.732	0.766966			131.326	0.961717
		15.049	0.553905				17.661	0.650045			12.993	0.478231			4.975	0.183114			2.368	0.0871585			1.144	0.042107			2.388	0.0878946						157.297	1.15191			99.917	0.731705			106.232	0.777951			44.039	0.322503
		1.221	0.0449411				18.281	0.672865			8.914	0.328096			7.405	0.272554			2.364	0.0870112			2.744	0.100998			3.428	0.126174						144.254	1.05639			67.431	0.493806			118.604	0.868552			67.345	0.493176
		45.026	1.65726				5.073	0.186721			12.764	0.469802			8.805	0.324084			4.882	0.179691			3.348	0.123229			2.758	0.101513						173.247	1.26871			81.243	0.594953			45.732	0.334901			125.172	0.916651
		14.907	0.548679				21.356	0.786046			5.122	0.188524			5.2	0.191395			3.901	0.143583			3.26	0.11999			1.141	0.0419965						194.668	1.42558			46.922	0.343616			39.125	0.286517			106.676	0.781202
		39.211	1.44323				13	0.478488			4.666	0.17174			6.694	0.246385			3.631	0.133645			1.595	0.0587068			2.759	0.10155						186.572	1.36629			80.817	0.591833			133.599	0.978363			107.965	0.790641
		45.289	1.66694				15.174	0.558506			5.352	0.19699			6.119	0.225221			2.545	0.0936733			2.693	0.0991207			2.558	0.0941518						163.02	1.19382			42.731	0.312925			40.05	0.293291			9.634	0.070551
		46.277	1.70331				6.748	0.248372			8.45	0.311017			4.239	0.156024			3.811	0.140271			3.088	0.113659			2.383	0.0877106						176.291	1.291			35.89	0.262827			76.476	0.560044			38.075	0.278828
		21.781	0.801689				14.327	0.527331			8.57	0.315434			5.303	0.195186			4.912	0.180795			3.17	0.116678			4.673	0.171998						185.48	1.35829			55.026	0.402962			162.016	1.18646			33.03	0.241883
		37.635	1.38522				14.899	0.548384			9.646	0.355038			5.165	0.190107			1.136	0.0418125			1.132	0.0416653			2.566	0.0944462						122.505	0.89712			98.411	0.720676			37.084	0.271571			48.971	0.358621
		13.851	0.509811				15.593	0.573928			15.233	0.560678			4.264	0.156944			2.093	0.0770366			2.876	0.105856			2.581	0.0949983						164.7	1.20612			68.968	0.505061			39.859	0.291893			59.7	0.437191
		22.543	0.829735				14.453	0.531968			16.045	0.590565			5.67	0.208694			2.673	0.0983845			1.614	0.0594062			2.701	0.0994151						190.924	1.39816			70.165	0.513827			6.442	0.0471756			51.06	0.373919
		28.811	1.06044				14.996	0.551955			7.909	0.291105			6.619	0.243624			2.241	0.082484			3.035	0.111709			2.335	0.0859438						157.312	1.15202			74.48	0.545427			56.91	0.416759			52.299	0.382992
		3.165	0.116493				7.259	0.26718			7.903	0.290884			16.701	0.61471			2.102	0.0773679			3.417	0.125769			2.301	0.0846924						172.251	1.26142			48.068	0.352008			82.842	0.606663			49.099	0.359558
		18.548	0.682692				9.478	0.348855			8.137	0.299497			6.803	0.250397			2.363	0.0869744			2.915	0.107292			4.737	0.174354						172.166	1.26079			46.345	0.33939			119.311	0.87373			25.235	0.184799
		3.873	0.142553				14.631	0.53852			7.959	0.292945			2.998	0.110347			2.291	0.0843243			3.155	0.116125			3.717	0.136811						169.121	1.23849			49.603	0.363249			58.241	0.426506			67.909	0.497306
		29.675	1.09224				10.714	0.394348			7.599	0.279695			6.371	0.234496			2.601	0.0957344			3.09	0.113733			3.51	0.129192						169.276	1.23963			63.482	0.464887			137.031	1.0035			52.53	0.384684
		32.608	1.2002				22.3	0.820791			4.954	0.182341			5.873	0.216166			2.029	0.074681			3.802	0.139939			0.814	0.0299607						167.108	1.22375			62.919	0.460764			30.685	0.22471			51.839	0.379624
		21.895	0.805885				13.897	0.511504			7.043	0.25923			5.816	0.214068			2.984	0.109831			3.318	0.122125			2.49	0.0916489						156.156	1.14355			58.459	0.428103			61.292	0.448849			52.801	0.386668
		10.742	0.395378				9.341	0.343812			12.841	0.472636			7.235	0.266297			3.981	0.146528			3.25	0.119622			3.667	0.13497						190.483	1.39493			36.608	0.268085			55.051	0.403146			49.529	0.362707
		22.723	0.836361				2.512	0.0924586			14.91	0.548789			7.63	0.280836			2.276	0.0837722			1.551	0.0570873			4.563	0.167949						170.8	1.25079			95.574	0.699901			44.083	0.322825			12.928	0.0946734
		19.72	0.72583				13.094	0.481948			4.336	0.159594			12.214	0.449558			4.338	0.159668			1.726	0.0635285			2.419	0.0890356						190.339	1.39388			62.253	0.455887			51.182	0.374812			8.145	0.0596469
		37.111	1.36594				17.432	0.641616			7.817	0.287719			4.261	0.156834			2.174	0.080018			3.027	0.111414			1.089	0.0400826						171.735	1.25764			28.153	0.206168			37.686	0.275979			20.631	0.151083
		33.695	1.2402				16.211	0.596675			7.125	0.262248			3.616	0.133093			0.815	0.0299975			2.537	0.0933788			1.86	0.0684606						220.84	1.61724			106.974	0.783384			56.205	0.411596			43.532	0.31879
		28.35	1.04347				8.071	0.297068			13.807	0.508191			3.784	0.139277			2.905	0.106924			9.012	0.331703			2.043	0.0751963						155.421	1.13817			48.471	0.354959			37.988	0.278191			41.934	0.307088
		25.55	0.940413				10.56	0.38868			7.781	0.286394			5.67	0.208694			3.132	0.115279			8.225	0.302736			2.526	0.0929739						154.005	1.1278			43.382	0.317692			64.972	0.475798			57.637	0.422083
		36.338	1.33748				15.441	0.568334			17.787	0.654682			3.02	0.111156			1.491	0.0548789			2.334	0.085907			1.433	0.0527441						155.587	1.13938			63.626	0.465941			46.567	0.341016			51.722	0.378767
		45.182	1.663				14.803	0.544851			13.446	0.494904			5.662	0.2084			15.708	0.578161			1.49	0.0548421			2.169	0.0798339						195.914	1.4347			108.912	0.797576			54.727	0.400773			56.492	0.413698
		20.965	0.771654				9.905	0.364571			8.56	0.315066			5.574	0.205161			3.818	0.140528			1.242	0.045714			1.826	0.0672092						168.771	1.23593			52.546	0.384801			47.871	0.350565			45.034	0.32979
		26.926	0.99106				21.275	0.783064			7.105	0.261512			6.263	0.230521			10.906	0.401415			1.364	0.0502045			1.862	0.0685342						185.943	1.36168			52.84	0.386954			52.939	0.387679			54.13	0.396401
		43.738	1.60986				10.372	0.38176			12.182	0.44838			4.37	0.160846			0.882	0.0324636			4.154	0.152895			2.194	0.0807541						196.611	1.43981			95.123	0.696598			42.529	0.311445			27.427	0.200851
		28.521	1.04977				5.745	0.211455			15.027	0.553096			2.644	0.0973171			1.076	0.0396041			10.222	0.376239			1.937	0.0712947						168.375	1.23303			51.955	0.380473			50.063	0.366618			56.632	0.414723
		42.015	1.54644				12.846	0.47282			10.416	0.383379			5.868	0.215982			13.566	0.499321			3.199	0.117745			1.247	0.0458981						144.412	1.05755			88.139	0.645453			49.283	0.360906			18.895	0.13837
		35.391	1.30263				11.903	0.438111			7.604	0.279879			4.716	0.173581			1.609	0.0592221			9.953	0.366338			2.147	0.0790242						185.198	1.35623			36.689	0.268678			59.186	0.433427			59.186	0.433427
		41.433	1.52502				21.233	0.781518			8.115	0.298687			3.336	0.122787			14.89	0.548053			3.49	0.128456			1.319	0.0485482						223.059	1.63349			62.346	0.456568			38.642	0.28298			52.828	0.386866
		26.665	0.981453				14.39	0.52965			18.435	0.678533			5.171	0.190328			9.907	0.364645			9.926	0.365344			2.52	0.0927531						196.029	1.43555			34.511	0.252728			44.936	0.329072			49.955	0.365827
		23.914	0.880197				12.918	0.47547			22.502	0.828226			6.295	0.231699			5.594	0.205897			1.55	0.0570505			2.036	0.0749386						193.597	1.41774			26.546	0.1944			21.073	0.15432			61.82	0.452716
		23.772	0.874971				4.597	0.169201			9.833	0.361921			3.178	0.116972			10.62	0.390888			3.924	0.14443			2.451	0.0902134						224.206	1.64189			43.368	0.317589			106.336	0.778712			49.507	0.362546
		26.01	0.957344				18.784	0.691379			8.692	0.319925			2.878	0.10593			13.743	0.505836			4.541	0.16714			1.915	0.070485						239.575	1.75444			41.247	0.302057			65.404	0.478962			50.733	0.371524
		18.388	0.676803				21.082	0.775961			12.763	0.469765			6.309	0.232214			2.904	0.106887			4.573	0.168317			3.747	0.137915						215.678	1.57944			35.168	0.25754			62.997	0.461335			54.671	0.400363
		21.2	0.780304				15.568	0.573008			9.885	0.363835			3.347	0.123192			12.992	0.478194			1.329	0.0489162			4.129	0.151975						135.041	0.988923			75.439	0.552449			45.734	0.334916			57.776	0.423101
		0.672	0.0247342				8.324	0.30638			7.863	0.289412			4.711	0.173397			9.21	0.33899			1.437	0.0528914			3.093	0.113843						118.165	0.865337			68.45	0.501268			47.559	0.348281			45.862	0.335853
		16.145	0.594246				22.61	0.832201			6.352	0.233797			8.048	0.296221			10.627	0.391146			11.094	0.408334			0.834	0.0306969						197.591	1.44698			38.453	0.281596			27.413	0.200749			104.824	0.76764
		19.786	0.728259				19.661	0.723658			8.358	0.307631			6.376	0.23468			14.373	0.529024			14.255	0.524681			2.582	0.0950351						165.726	1.21363			44.496	0.32585			26.712	0.195615			69.634	0.509939
		21.734	0.799959				9.615	0.353897			9.336	0.343628			4.47	0.164526			1.409	0.0518608			4.927	0.181347			3.048	0.112187						127.628	0.934636			43.115	0.315737			31.047	0.227361			76.1	0.55729
		31.986	1.1773				9.74	0.358498			3.8	0.139866			3.138	0.1155			10.99	0.404507			9.422	0.346794			1.438	0.0529282						123.27	0.902722			36.274	0.265639			28.112	0.205868			66.063	0.483788
		17.682	0.650818				12.711	0.467851			11.16	0.410764			4.072	0.149877			12.497	0.459974			3.35	0.123303			15.206	0.559684						129.786	0.950439			84.924	0.621909			31.423	0.230115			108.809	0.796822
		22.729	0.836581				10.194	0.375208			9.17	0.337518			6.64	0.244397			9.604	0.353492			5.617	0.206744			3.485	0.128272						199.326	1.45969			28.573	0.209244			47.442	0.347424			65.86	0.482301
		33.458	1.23148				9.305	0.342487			7.656	0.281793			3.443	0.126726			10.788	0.397072			3.603	0.132615			9.612	0.353787						201.968	1.47904			129.148	0.945767			42.612	0.312053			122.046	0.893758
		11.13	0.40966				9.723	0.357872			8.939	0.329016			4.559	0.167802			3.399	0.125106			5.916	0.217749			0.883	0.0325004						142.967	1.04697			103.866	0.760624			40.064	0.293394			64.87	0.475051
		18.727	0.689281				10.954	0.403182			9.085	0.33439			4.644	0.170931			12.435	0.457692			2.398	0.0882627			1.078	0.0396777						177.179	1.2975			63.96	0.468387			37.422	0.274046			76.666	0.561435
		29.204	1.07491				13.554	0.498879			5.57	0.205014			5.685	0.209247			0.936	0.0344512			6.406	0.235784			12.619	0.464465						56.712	0.415309			50.904	0.372776			43.747	0.320365			96.153	0.704141
		27.74	1.02102				12.679	0.466673			5.501	0.202474			8.516	0.313447			3.805	0.14005			3.461	0.127388			1.544	0.0568297						128.782	0.943087			117.794	0.862621			46.037	0.337135			53.421	0.391209
		30.771	1.13258				15.251	0.56134			3.844	0.141485			6.13	0.225626			11.477	0.422431			4.757	0.17509			14.192	0.522362						143.204	1.0487			135.45	0.991918			43.823	0.320921			69.428	0.50843
		21.145	0.778279				11.039	0.40631			5.861	0.215725			2.417	0.088962			3.723	0.137032			3.774	0.138909			5.218	0.192058						160.818	1.17769			112.168	0.821421			76.299	0.558747			83.28	0.60987
		30.972	1.13998				3.874	0.142589			8.289	0.305091			2.759	0.10155			11.635	0.428247			4.614	0.169827			8.998	0.331187						72.614	0.531762			122.272	0.895413			47.216	0.345769			90.597	0.663453
		29.934	1.10177				10.355	0.381134			5.892	0.216866			4.61	0.169679			10.965	0.403586			1.59	0.0585228			12.501	0.460122						175.697	1.28665			89.462	0.655142			50.593	0.370499			63.143	0.462404
		10.374	0.381834				10.834	0.398765			8.446	0.31087			3.729	0.137253			11.472	0.422247			1.726	0.0635285			3.02	0.111156						87.935	0.643959			96.335	0.705474			14.457	0.10587			62.904	0.460654
		39.88	1.46785				11.455	0.421622			7.686	0.282897			4.301	0.158306			8.639	0.317974			2.682	0.0987158			2.8	0.103059						111.205	0.814368			90.49	0.66267			34.707	0.254164			22.493	0.164719
		32.545	1.19788				6.996	0.2575			8.263	0.304134			4.678	0.172182			11.186	0.411721			3.433	0.126358			12.533	0.461299						134.586	0.98559			96.196	0.704456			37.537	0.274888			27.377	0.200485
		31.217	1.149				11.38	0.418861			3.875	0.142626			7.348	0.270456			11.662	0.429241			3.641	0.134014			8.519	0.313557						155.42	1.13816			82.379	0.603272			59.293	0.43421			42.317	0.309893
		43.85	1.61398				3.583	0.131879			8.633	0.317753			5.229	0.192463			1.062	0.0390888			4.364	0.160625			11.418	0.42026						98.254	0.719527			95.391	0.69856			38.407	0.281259			65.454	0.479328
		20.014	0.736651				20.614	0.758735			6.819	0.250985			3.654	0.134492			6.711	0.24701			4.316	0.158858			13.801	0.50797						108.723	0.796192			107.379	0.78635			48.211	0.353055			95.149	0.696788
		23.352	0.859512				11.84	0.435792			9.111	0.335347			14.043	0.516878			4.75	0.174832			4.558	0.167765			1.312	0.0482905						134.648	0.986045			120.839	0.884919			43.862	0.321207			60.749	0.444873
		39.676	1.46035				2.176	0.0800916			8.244	0.303435			4.362	0.160551			2.762	0.10166			1.471	0.0541428			10.492	0.386177						122.154	0.894549			102.125	0.747874			41.527	0.304108			55.66	0.407605
		37.26	1.37142				7.573	0.278738			4.324	0.159153			6.191	0.227871			12.468	0.458907			10.007	0.368326			8.109	0.298466						179.694	1.31592			77.154	0.565009			15.215	0.111421			57.82	0.423423
		25.956	0.955357				7.63	0.280836			2.774	0.102102			4.518	0.166293			11.806	0.434541			6.06	0.223049			11.94	0.439473						152.994	1.12039			112.972	0.827308			41.718	0.305506			140.003	1.02526
		25.188	0.927089				11.669	0.429498			2.644	0.0973171			4.765	0.175384			15.423	0.567671			1.739	0.064007			8.959	0.329752						117.923	0.863565			117.794	0.862621			15.271	0.111831			85.544	0.62645
		1.302	0.0479224				18.938	0.697047			14.605	0.537563			8.172	0.300785			3.107	0.114359			3.472	0.127793			9.554	0.351652						179.3	1.31304			41.262	0.302167			50.608	0.370609			49.522	0.362656
		1.447	0.0532594				6.527	0.240238			1.341	0.0493579			3.862	0.142148			8.148	0.299902			5.433	0.199971			3.297	0.121352						191.306	1.40096			58.043	0.425056			56.356	0.412702			65.791	0.481796
		1.729	0.0636389				10.102	0.371822			4.018	0.14789			4.024	0.148111			11.49	0.42291			1.347	0.0495787			12.402	0.456478						111.368	0.815562			61.536	0.450636			37.43	0.274105			83.774	0.613488
		4.118	0.15157				7.756	0.285473			13.434	0.494462			5.804	0.213627			8.082	0.297472			1.485	0.0546581			0.888	0.0326844						136.44	0.999168			86.33	0.632206			39.363	0.28826			51.761	0.379052
		32.487	1.19574				12.822	0.471937			4.202	0.154662			10.49	0.386103			5.204	0.191543			5.668	0.208621			3.728	0.137216						165.14	1.20934			92.697	0.678832			42.653	0.312353			98.064	0.718135
		29.982	1.10354				12.845	0.472783			2.946	0.108433			2.9	0.10674			2.932	0.107917			1.372	0.0504989			11.217	0.412862						81.974	0.600306			69.637	0.509961			31.688	0.232055			88.381	0.647225
		3.808	0.14016				10.977	0.404028			3.731	0.137326			5.235	0.192684			3.186	0.117266			3.17	0.116678			3.557	0.130922						146.764	1.07477			73.175	0.53587			50.915	0.372857			32.994	0.241619
		22.223	0.817957				12.213	0.449521			18.256	0.671945			5.648	0.207885			4.827	0.177666			1.668	0.0613937			11.275	0.414997						167.69	1.22802			32.804	0.240228			72.887	0.533761			19.65	0.143899
		3.129	0.115168				10.939	0.402629			7.23	0.266113			8.522	0.313667			9.628	0.354376			2.783	0.102433			10.131	0.37289						188.482	1.38028			105.209	0.770459			47.196	0.345622			44.663	0.327073
		35.723	1.31485				2.113	0.0777727			10.161	0.373994			3.853	0.141817			20.389	0.750454			4.518	0.166293			10.926	0.402151						145.913	1.06854			47.029	0.344399			65.656	0.480807			40.393	0.295803
		29.92	1.10126				8.233	0.30303			7.387	0.271892			6.53	0.240348			9.132	0.33612			5.891	0.216829			7.858	0.289228						148.918	1.09055			47.194	0.345608			18.31	0.134086			72.659	0.532091
		1.268	0.046671				2.17	0.0798707			10.566	0.3889			5.581	0.205419			11.464	0.421953			4.182	0.153926			10.655	0.392176						99.922	0.731742			67.279	0.492693			30.458	0.223048			53.937	0.394988
		1.265	0.0465606				3.734	0.137437			13.774	0.506977			1.724	0.0634549			12.678	0.466636			2.693	0.0991207			12.752	0.46936						146.61	1.07364			71.113	0.52077			44.943	0.329123			27.699	0.202843
		15.343	0.564727				13.611	0.500977			10.032	0.369246			5.615	0.20667			4.151	0.152785			5.005	0.184218			1.069	0.0393465						107.044	0.783897			100.802	0.738186			38.844	0.28446			55.697	0.407876
		31.526	1.16037				12.994	0.478267			10.574	0.389195			2.758	0.101513			17.438	0.641837			2.033	0.0748282			2.662	0.0979797						199.058	1.45773			108.301	0.793102			41.387	0.303082			45.825	0.335582
		9.23	0.339727				8.019	0.295154			5.271	0.194009			4.486	0.165115			9.018	0.331924			1.628	0.0599214			4.441	0.163459						115.76	0.847725			133.385	0.976795			50.944	0.373069			32.985	0.241553
		38.107	1.4026				1.815	0.0668043			6.282	0.23122			3.977	0.146381			2.039	0.075049			2.532	0.0931948			11.226	0.413193						123.025	0.900928			81.357	0.595788			52.332	0.383234			50.518	0.36995
		27.661	1.01811				18.338	0.674963			8.367	0.307962			3.085	0.113549			12.454	0.458392			2.355	0.08668			2.993	0.110163						209.615	1.53504			94.685	0.69339			31.204	0.228511			55.629	0.407378
		14.709	0.541391				14.181	0.521957			4.18	0.153852			6.728	0.247636			17.598	0.647726			1.688	0.0621299			9.201	0.338659						63.845	0.467545			57.845	0.423606			40.433	0.296096			47.034	0.344436
		38.759	1.42659				11.844	0.43594			7.868	0.289596			5.74	0.211271			3.291	0.121131			1.649	0.0606944			8.229	0.302883						130.197	0.953449			28.559	0.209141			32.946	0.241268			50.053	0.366545
		43.35	1.59557				8.69	0.319851			5.676	0.208915			5.061	0.186279			14.311	0.526742			3.148	0.115868			5.186	0.19088						140.18	1.02656			43.901	0.321493			45.873	0.335934			15.736	0.115237
		42.024	1.54677				12.276	0.45184			5.173	0.190402			6.009	0.221172			14.442	0.531564			2.606	0.0959185			7.113	0.261807						203.872	1.49298			88.465	0.647841			45.814	0.335502			48.063	0.351971
		33.133	1.21952				6.715	0.247158			8.615	0.31709			6.305	0.232067			9.857	0.362804			3.042	0.111966			4.299	0.158232						127.692	0.935105			72.147	0.528342			45.802	0.335414			54.649	0.400202
		2.533	0.0932316				10.142	0.373294			7.336	0.270015			8.178	0.301006			17.586	0.647284			3.029	0.111488			2.862	0.105341						179.165	1.31205			79.266	0.580475			72.62	0.531806			18.252	0.133662
		28.989	1.06699				9.695	0.356842			6.174	0.227245			4.109	0.151239			6.987	0.257169			1.691	0.0622403			3.488	0.128382						150.481	1.10199			107.172	0.784834			67.027	0.490847			55.492	0.406375
		23.477	0.864113				14.854	0.546728			7.612	0.280173			3.851	0.141743			9.973	0.367074			1.588	0.0584492			4.135	0.152196						181.269	1.32746			100.693	0.737388			59.06	0.432504			54.927	0.402237
		23.565	0.867352				15.233	0.560678			20.392	0.750564			4.59	0.168943			2.681	0.098679			2.663	0.0980165			9.156	0.337003						181.771	1.33113			77.529	0.567755			38.287	0.280381			60.987	0.446616
		1.789	0.0658473				8.955	0.329605			15.403	0.566935			9.856	0.362768			11.563	0.425597			3.501	0.128861			19.355	0.712395						163.345	1.1962			84.99	0.622393			42.377	0.310332			27.442	0.200961
		10.16	0.373957				1.86	0.0684606			11.073	0.407562			8.269	0.304355			13.782	0.507271			4.961	0.182598			11.386	0.419082						143.676	1.05216			65.248	0.477819			44.441	0.325447			39.667	0.290487
		40.771	1.50065				6.871	0.252899			10.616	0.390741			10.465	0.385183			2.387	0.0878578			4.347	0.159999			8.681	0.31952						169.712	1.24282			76.085	0.55718			38.682	0.283273			17.067	0.124984
		37.385	1.37602				12.213	0.449521			11.887	0.437522			4.599	0.169274			2.337	0.0860175			4.427	0.162944			10.488	0.38603						184.32	1.3498			77.949	0.57083			36.72	0.268905			31.03	0.227237
		35.254	1.29759				11.185	0.411684			12.564	0.46244			6.167	0.226987			2.806	0.10328			1.809	0.0665835			16.872	0.621004						154.002	1.12778			77.077	0.564445			56.753	0.415609			33.408	0.244651
		43.17	1.58895				11.527	0.424272			6.895	0.253783			4.242	0.156134			11.703	0.43075			2.93	0.107844			1.945	0.0715892						3.82	0.0279743			57.544	0.421402			37.697	0.27606			41.229	0.301925
		39.933	1.46981				12.621	0.464538			6.938	0.255365			3.511	0.129229			7.954	0.292761			1.576	0.0580075			10.351	0.380987						150.567	1.10262			75.334	0.551681			46.852	0.343103			24.732	0.181116
		29.825	1.09776				12.09	0.444994			6.59	0.242557			3.867	0.142332			6.609	0.243256			1.54	0.0566824			12.702	0.46752						157.687	1.15476			99.843	0.731163			49.958	0.365849			21.743	0.159227
		29.469	1.08466				10.573	0.389158			6.451	0.237441			4.791	0.176341			9.107	0.335199			1.539	0.0566456			3.156	0.116162						58.614	0.429238			9.599	0.0702947			61.643	0.45142			33.872	0.248049
		29.494	1.08558				12.26	0.451251			6.639	0.24436			3.964	0.145902			17.283	0.636132			3.591	0.132173			17.278	0.635948						132.828	0.972716			80.855	0.592111			64.546	0.472679			25.28	0.185129
		35.094	1.2917				1.95	0.0717732			9.806	0.360927			2.21	0.081343			3.656	0.134566			4.354	0.160257			11.059	0.407046						176.741	1.2943			56.829	0.416166			47.866	0.350529			48.152	0.352623
		31.424	1.15662				14.616	0.537968			12.954	0.476795			5.947	0.21889			9.829	0.361774			1.862	0.0685342			13.35	0.491371						180.097	1.31887			66.949	0.490276			54.436	0.398642			31.492	0.23062
		38.452	1.41529				10.264	0.377785			12.425	0.457324			3.048	0.112187			14.917	0.549047			1.946	0.071626			9.46	0.348192						153.246	1.12224			95.673	0.700626			55.635	0.407422			32.873	0.240733
		35.709	1.31433				14.745	0.542716			9.99	0.3677			6.432	0.236741			12.708	0.467741			3.122	0.114911			17.297	0.636647						28.291	0.207179			72.858	0.533548			45.095	0.330236			35.994	0.263589
		45.978	1.6923				9.695	0.356842			10.426	0.383748			3.617	0.13313			17.245	0.634733			3.758	0.13832			9.154	0.336929						150.346	1.101			34.674	0.253922			86.227	0.631451			37.625	0.275533
		33.191	1.22165				8.183	0.30119			8.59	0.31617			5.12	0.188451			20.032	0.737314			3.635	0.133793			2.622	0.0965074						69.878	0.511726			98.1	0.718399			35.226	0.257964			25.416	0.186125
		36.436	1.34109				10.481	0.385772			9.14	0.336414			12.868	0.47363			16.676	0.61379			3.77	0.138762			5.565	0.20483						30.875	0.226102			63.664	0.46622			47.582	0.348449			30.648	0.224439
		39.262	1.44511				8.424	0.31006			10.338	0.380509			12.822	0.471937			12.387	0.455926			3.512	0.129265			2.297	0.0845452						52.329	0.383212			21.456	0.157125			20.152	0.147576			39.19	0.286993
		23.124	0.85112				11.206	0.412457			9.141	0.336451			3.971	0.14616			12.617	0.464391			1.974	0.0726566			15.024	0.552985						99.104	0.725751			74.327	0.544306			52.196	0.382238			39.935	0.292449
		41.956	1.54427				14.726	0.542017			7.254	0.266996			3.422	0.125953			14.432	0.531196			3.333	0.122677			2.246	0.082668						71.065	0.520418			76.971	0.563668			43.482	0.318424			35.324	0.258682
		39.794	1.46469				6.517	0.23987			8.047	0.296184			2.849	0.104863			14.336	0.527662			1.668	0.0613937			11.595	0.426775						66.239	0.485077			77.281	0.565939			52.275	0.382817			41.616	0.304759
		36.491	1.34312				0.87	0.0320219			9.97	0.366964			1.71	0.0629396			9.685	0.356474			2.565	0.0944094			2.476	0.0911336						90.7	0.664208			75.734	0.55461			48.226	0.353165			47.484	0.347731
		35.987	1.32457				9.081	0.334242			5.718	0.210461			6.836	0.251611			4.531	0.166772			4.182	0.153926			10.754	0.39582						84.642	0.619844			72.715	0.532501			26.498	0.194048			25.264	0.185012
		37.662	1.38622				8.687	0.319741			6.317	0.232508			5.306	0.195297			19.143	0.704592			2.48	0.0912808			8.403	0.309287						88.124	0.645343			86.173	0.631056			8.327	0.0609797			55.877	0.409194
		31.561	1.16166				14.401	0.530055			7.675	0.282492			3.523	0.12967			12.703	0.467557			5.505	0.202621			7.3	0.26869						81.061	0.59362			81.773	0.598834			49.124	0.359741			28.959	0.21207
		29.06	1.06961				11.148	0.410322			9.643	0.354928			11.949	0.439804			9.262	0.340904			2.689	0.0989734			5.951	0.219037						47.661	0.349028			74.808	0.547829			21.92	0.160523			33.987	0.248891
		31.297	1.15194				4.567	0.168097			5.934	0.218411			5.637	0.20748			2.488	0.0915753			2.636	0.0970227			8.849	0.325703						133.643	0.978685			85.641	0.62716			44.417	0.325271			25.745	0.188534
		45.029	1.65737				9.527	0.350658			8.579	0.315765			4.673	0.171998			7.941	0.292283			2.593	0.09544			16.212	0.596712						59.535	0.435982			95.182	0.69703			41.866	0.30659			34.683	0.253988
		34.648	1.27528				15.19	0.559095			14.144	0.520595			5.056	0.186095			14.197	0.522546			5.081	0.187015			3.348	0.123229						132.552	0.970695			109.223	0.799854			18.818	0.137807			102.047	0.747303
		39.94	1.47006				6.88	0.253231			10.654	0.392139			5.261	0.19364			12.427	0.457398			2.744	0.100998			6.427	0.236557						57.193	0.418832			60.004	0.439417			44.019	0.322357			92.017	0.673852
		35.625	1.31124				11.89	0.437633			14.995	0.551918			2.364	0.0870112			8.865	0.326292			3.437	0.126505			13.581	0.499873						58.142	0.425781			108.82	0.796903			111.937	0.819729			13.08	0.0957865
		32.542	1.19777				8.069	0.296994			10.938	0.402593			6.282	0.23122			13.424	0.494094			3.054	0.112408			9.607	0.353603						59.987	0.439292			19.592	0.143475			13.809	0.101125			78.067	0.571695
		39.837	1.46627				4.42	0.162686			8.94	0.329053			11.808	0.434615			13.113	0.482647			2.577	0.0948511			11.252	0.41415						43.792	0.320694			109.744	0.803669			16.115	0.118012			9.299	0.0680978
		37.027	1.36284				8.861	0.326145			10.603	0.390262			5.847	0.215209			6.169	0.227061			2.072	0.0762637			17.241	0.634586						200.817	1.47061			86.377	0.63255			32.544	0.238324			55.68	0.407752
		41.957	1.5443				10.485	0.385919			11.624	0.427842			3.805	0.14005			7.223	0.265855			1.874	0.0689759			12.167	0.447828						48.672	0.356431			106.328	0.778654			51.879	0.379917			97.037	0.710614
		31.716	1.16736				13.433	0.494426			9.035	0.332549			2.251	0.0828521			10.763	0.396151			3.044	0.11204			11.465	0.42199						157.407	1.15271			51.436	0.376672			112.605	0.824621			70.311	0.514896
		32.756	1.20564				8.409	0.309508			13.473	0.495898			5.065	0.186426			2.368	0.0871585			2.253	0.0829257			8.297	0.305386						67.045	0.490979			89.249	0.653582			116.736	0.854873			65.859	0.482294
		36.604	1.34728				4.572	0.168281			8.55	0.314698			4.944	0.181973			9.659	0.355517			6.344	0.233502			7.309	0.269021						156.125	1.14332			114.656	0.839641			70.482	0.516149			76.096	0.557261
		33.863	1.24639				8.323	0.306343			11.05	0.406715			6.945	0.255623			11.37	0.418493			2.303	0.084766			3.96	0.145755						72.792	0.533065			104.794	0.76742			4.436	0.0324854			88.998	0.651744
		39.165	1.44154				12.98	0.477752			15.363	0.565463			5.514	0.202953			8.141	0.299644			2.24	0.0824472			18.329	0.674632						57.373	0.42015			95.191	0.697096			42.703	0.31272			71.512	0.523692
		31.186	1.14786				6.61	0.243293			10.055	0.370092			8.401	0.309214			10.757	0.395931			2.729	0.100446			8.852	0.325814						62.256	0.455909			12.263	0.0898035			45.945	0.336461			65.438	0.479211
		27.184	1.00056				10.448	0.384557			9.698	0.356952			1.931	0.0710739			8.503	0.312968			1.967	0.0723989			2.406	0.0885571						14.946	0.109451			74.955	0.548905			79.861	0.584832			98.147	0.718743
		35.294	1.29906				1.867	0.0687183			5.942	0.218706			5.711	0.210204			5.499	0.202401			4.269	0.157128			7.469	0.27491						11.633	0.0851899			99.407	0.72797			119.728	0.876783			102.759	0.752517
		38.977	1.43462				10.61	0.39052			10.85	0.399354			2.855	0.105083			8.908	0.327875			2.385	0.0877842			13.647	0.502302						18.742	0.13725			23.205	0.169933			100.613	0.736802			96.183	0.70436
		35.397	1.30285				9.637	0.354707			4.076	0.150024			1.348	0.0496155			11.526	0.424235			3.303	0.121573			9.702	0.357099						35.017	0.256434			22.471	0.164558			48.139	0.352528			94.795	0.694196
		26.161	0.962902				6.462	0.237845			4.543	0.167213			5.79	0.213111			0.955	0.0351505			2.611	0.0961025			8.15	0.299975						77.283	0.565953			9.867	0.0722573			114.677	0.839794			96.049	0.703379
		33.062	1.21691				4.14	0.15238			10.448	0.384557			8.426	0.310134			2.218	0.0816375			2.086	0.076779			10.242	0.376975						62.107	0.454817			81.915	0.599874			57.423	0.420516			99.314	0.727289
		41.212	1.51688				11.921	0.438774			9.869	0.363246			8.103	0.298245			6.75	0.248446			2.544	0.0936365			13.114	0.482684						124.282	0.910133			89.955	0.658752			72.214	0.528832			87.61	0.641579
		39.46	1.4524				9.265	0.341015			9.663	0.355664			6.089	0.224117			1.223	0.0450147			7.035	0.258936			5.828	0.21451						155.613	1.13957			12.881	0.0943292			43.922	0.321646			33	0.241663
		26.588	0.978619				7.861	0.289338			9.083	0.334316			5.884	0.216571			5.579	0.205345			8.131	0.299276			10.404	0.382938						90.506	0.662787			94.214	0.689941			65.925	0.482777			34.558	0.253073
		36.226	1.33336				7.575	0.278811			7.321	0.269462			5.439	0.200192			12.417	0.45703			7.871	0.289706			2.213	0.0814534						158.142	1.15809			87.39	0.639968			18.147	0.132893			32.954	0.241326
		38.811	1.42851				13.852	0.509848			7.368	0.271192			2.444	0.0899558			1.257	0.0462661			3.752	0.138099			9.268	0.341125						128.997	0.944662			83.013	0.607915			34.43	0.252135			44.834	0.328325
		34.763	1.27951				8.623	0.317385			7.088	0.260886			4.285	0.157717			4.37	0.160846			9.458	0.348119			10.762	0.396115						136.884	1.00242			12.926	0.0946587			44.05	0.322584			17.21	0.126031
		26.923	0.990949				5.733	0.211013			4.523	0.166477			11.266	0.414665			11.345	0.417573			3.592	0.13221			7.831	0.288234						126.901	0.929312			123.877	0.907167			38.436	0.281472			112.147	0.821267
		30.331	1.11639				2.293	0.084398			8.05	0.296295			10.476	0.385588			7.812	0.287535			2.949	0.108543			5.949	0.218964						117.33	0.859223			118.27	0.866106			41.99	0.307498			83.325	0.6102
		30.991	1.14068				11.1	0.408555			7.987	0.293976			6.106	0.224742			17.499	0.644082			8.376	0.308294			9.029	0.332328						110.955	0.812538			200.474	1.4681			48.417	0.354564			103.447	0.757556
		26.474	0.974423				6.14	0.225994			10.61	0.39052			7.971	0.293387			8.782	0.323237			5.238	0.192794			5.218	0.192058						128.87	0.943731			74.437	0.545112			36.638	0.268305			39.74	0.291021
		36.684	1.35022				8.775	0.32298			7.228	0.266039			9.461	0.348229			7.907	0.291031			9	0.331261			2.013	0.0740921						71.606	0.52438			91.527	0.670264			39.269	0.287572			82.553	0.604546
		32.479	1.19545				10.255	0.377454			11.078	0.407746			4.262	0.156871			1.429	0.0525969			5.122	0.188524			0.923	0.0339727						76.256	0.558432			109.635	0.802871			38.002	0.278294			80.544	0.589834
		34.196	1.25864				6.465	0.237956			4.941	0.181862			4.364	0.160625			7.559	0.278222			6.115	0.225073			9.857	0.362804						129.398	0.947598			57.937	0.42428			69.79	0.511081			84.975	0.622283
		31.195	1.14819				12.332	0.453901			10.631	0.391293			4.702	0.173066			6.352	0.233797			1.073	0.0394937			8.375	0.308257						165.812	1.21426			108.298	0.79308			43.445	0.318153			57.226	0.419073
		26.71	0.983109				17.288	0.636316			13.532	0.498069			6.465	0.237956			8.874	0.326623			6.604	0.243072			1.246	0.0458613						106.726	0.781568			125.629	0.919997			68.701	0.503106			73.722	0.539876
		32.001	1.17785				6.913	0.254445			12.146	0.447055			4.968	0.182856			8.278	0.304687			13.013	0.478967			5.313	0.195554						126.363	0.925372			125.352	0.917969			60.282	0.441453			45.349	0.332097
		29.984	1.10361				7.166	0.263757			7.428	0.273401			5.852	0.215393			5.604	0.206265			11.705	0.430823			7.007	0.257905						128.498	0.941007			133.556	0.978048			38.294	0.280432			79.748	0.584005
		34.271	1.26141				7.233	0.266223			11.585	0.426407			4.571	0.168244			4.918	0.181016			8.056	0.296515			9.297	0.342193						140.257	1.02712			44.959	0.329241			25.797	0.188915			75.844	0.555415
		24.8	0.912808				15.515	0.571057			10.892	0.4009			5.853	0.21543			7.322	0.269499			10.493	0.386214			7.59	0.279364						149.553	1.0952			37.769	0.276587			38.875	0.284687			56.838	0.416232
		35.783	1.31706				8.247	0.303546			11.736	0.431964			7.768	0.285915			7.994	0.294233			9.013	0.33174			17.04	0.627188						76.002	0.556572			17.343	0.127005			45.121	0.330427			58.851	0.430973
		31.841	1.17196				5.94	0.218632			4.485	0.165078			6.727	0.247599			5.598	0.206044			6.531	0.240385			8.557	0.314956						143.481	1.05073			149.507	1.09486			37.857	0.277232			31.521	0.230832
		20.072	0.738786				8.491	0.312526			2.86	0.105267			5.571	0.205051			2.916	0.107329			7.198	0.264935			1.434	0.0527809						73.841	0.540747			79.825	0.584569			37.551	0.274991			41.299	0.302438
		36.318	1.33675				6.512	0.239686			2.953	0.10869			6.311	0.232288			2.678	0.0985686			6.727	0.247599			7.701	0.283449						119.873	0.877845			137.967	1.01035			60.169	0.440625			32.849	0.240557
		25.56	0.940781				11.99	0.441313			16.189	0.595865			6.051	0.222718			8.471	0.31179			6.561	0.241489			7.781	0.286394						104.344	0.764124			18.165	0.133025			37.301	0.27316			58.048	0.425093
		37.514	1.38077				8.743	0.321802			4.332	0.159447			4.247	0.156318			1.243	0.0457508			7.826	0.28805			6.278	0.231073						103.702	0.759423			14.779	0.108229			50.094	0.366845			52.959	0.387826
		31.723	1.16762				5.078	0.186905			1.92	0.070669			5.559	0.204609			10.76	0.396041			10.298	0.379036			5.321	0.195849						106.112	0.777072			97.767	0.71596			48.382	0.354308			33.105	0.242432
		47.162	1.73588				8.39	0.308809			2.966	0.109169			4.173	0.153595			8.01	0.294822			3.732	0.137363			8.016	0.295043						144.078	1.0551			60.03	0.439607			47.704	0.349342			38.895	0.284833
		26.94	0.991575				5.136	0.18904			22.652	0.833747			7.379	0.271597			7.937	0.292135			5.893	0.216902			4.282	0.157607						88.992	0.6517			48.974	0.358643			61.655	0.451507			59.942	0.438963
		25.655	0.944278				6.552	0.241158			5.299	0.195039			4.29	0.157901			22.062	0.812031			5.084	0.187126			5.386	0.198241						163.882	1.20013			85.979	0.629635			54.605	0.399879			54.477	0.398942
		28.695	1.05617				8.437	0.310539			4.502	0.165704			4.467	0.164416			2.749	0.101182			3.489	0.128419			5.337	0.196438						102.874	0.753359			9.755	0.0714371			29.125	0.213286			64.62	0.473221
		33.726	1.24135				7.881	0.290074			18.917	0.696274			8.008	0.294749			3.476	0.12794			6.552	0.241158			3.173	0.116788						20.42	0.149538			94.726	0.693691			82.636	0.605154			58.756	0.430278
		33.497	1.23292				15.406	0.567045			17.595	0.647615			6.388	0.235122			10.94	0.402666			4.582	0.168649			2.493	0.0917593						146.195	1.0706			160.685	1.17672			45.515	0.333312			49.392	0.361704
		29.953	1.10247				20.119	0.740516			4.24	0.156061			6.629	0.243992			10.902	0.401268			5.725	0.210719			8.354	0.307484						152.046	1.11345			84.523	0.618973			48.001	0.351517			24.052	0.176136
		26.553	0.977331				16.057	0.591007			5.192	0.191101			5.056	0.186095			6.474	0.238287			12.617	0.464391			1.222	0.0449779						119.469	0.874887			43.171	0.316147			20.658	0.151281			28.484	0.208592
		29.063	1.06972				12.446	0.458097			4.535	0.166919			5.933	0.218375			10.071	0.370681			8.916	0.328169			10.409	0.383122						15.567	0.113999			137.833	1.00937			53.588	0.392432			28.856	0.211316
		34.379	1.26538				6.867	0.252752			3.828	0.140896			4.158	0.153043			13.043	0.480071			9.28	0.341567			7.822	0.287903						140.868	1.03159			137.158	1.00443			46.547	0.34087			41.579	0.304488
		32.884	1.21035				11.777	0.433474			4.082	0.150245			5.099	0.187678			10.713	0.394311			16.29	0.599583			19.115	0.703562						137.571	1.00745			138.223	1.01222			51.858	0.379763			47.465	0.347592
		31.002	1.14108				11.033	0.406089			5.02	0.18477			5.947	0.21889			10.419	0.38349			4.363	0.160588			7.809	0.287424						133.516	0.977755			25.85	0.189303			8.724	0.063887			32.596	0.238705
		34.613	1.27399				10.51	0.386839			4.188	0.154147			7.138	0.262727			13.116	0.482758			16.24	0.597742			2.661	0.0979429						97.447	0.713617			75.242	0.551007			48.867	0.357859			112.334	0.822636
		35.869	1.32022				12.628	0.464796			5.157	0.189813			7.313	0.269168			14.356	0.528398			8.104	0.298282			3.402	0.125217						133.826	0.980025			111.875	0.819275			18.741	0.137243			47.957	0.351195
		35.142	1.29346				16.085	0.592037			9.633	0.35456			4.287	0.157791			6.215	0.228754			3.858	0.142001			10.533	0.387686						159.139	1.1654			86.165	0.630997			7.517	0.055048			49.888	0.365336
		34.201	1.25883				20.136	0.741141			6.517	0.23987			4.637	0.170673			3.487	0.128345			13.578	0.499763			11.001	0.404911						126.221	0.924333			78.056	0.571614			41.426	0.303368			45.356	0.332148
		37.858	1.39343				12.693	0.467189			4.504	0.165778			3.706	0.136406			10.291	0.378779			12.243	0.450625			5.972	0.21981						167.922	1.22971			44.677	0.327175			41.5	0.30391			51.012	0.373567
		49.82	1.83371				9.265	0.341015			7.822	0.287903			6.708	0.2469			2.823	0.103906			9.853	0.362657			9.692	0.356731						89.926	0.65854			136.749	1.00143			41.429	0.30339			42.314	0.309871
		43.035	1.58398				13.388	0.492769			6.231	0.229343			2.987	0.109942			10.536	0.387796			7.048	0.259414			2.316	0.0852445						158.48	1.16057			108.73	0.796244			106.609	0.780711			40.673	0.297854
		32.428	1.19357				16.862	0.620636			5.177	0.190549			4.247	0.156318			10.765	0.396225			10.639	0.391587			12.413	0.456883						168.934	1.23713			95.04	0.69599			13.118	0.0960648			45.141	0.330573
		35.969	1.3239				11.93	0.439105			6.636	0.24425			11.303	0.416027			10.599	0.390115			6.385	0.235011			10.408	0.383085						154.976	1.13491			50.437	0.369357			16.624	0.12174			42.91	0.314235
		42.311	1.55733				7.752	0.285326			5.229	0.192463			10.561	0.388716			3.026	0.111377			10.231	0.37657			7.864	0.289449						172.048	1.25993			121.551	0.890134			32.96	0.24137			40.927	0.299714
		23.119	0.850936				7.232	0.266187			7.802	0.287167			10.492	0.386177			10.079	0.370976			8.387	0.308699			12.551	0.461962						36.183	0.264973			89.356	0.654365			107.354	0.786167			47.855	0.350448
		29.149	1.07288				10.932	0.402372			7.732	0.28459			8.561	0.315103			8.013	0.294933			13.245	0.487506			10.645	0.391808						117.856	0.863075			49.475	0.362312			111.705	0.81803			51.382	0.376277
		32.469	1.19508				13.426	0.494168			5.903	0.21727			5.317	0.195702			3.163	0.11642			8.348	0.307263			5.844	0.215099						126.585	0.926998			77.428	0.567015			71.031	0.520169			43.278	0.31693
		28.401	1.04535				5.181	0.190696			6.269	0.230742			3.102	0.114175			14.917	0.549047			3.594	0.132284			3.273	0.120469						129.935	0.951531			99.652	0.729764			4.531	0.0331811			42.539	0.311519
		15.628	0.575216				9.837	0.362068			6.311	0.232288			8.969	0.33012			6.464	0.237919			16.725	0.615593			9.976	0.367184						98.219	0.71927			99.825	0.731031			41.19	0.30164			37	0.270956
		27.814	1.02374				11.975	0.440761			6.076	0.223638			10.398	0.382717			8.689	0.319814			9.808	0.361001			2.714	0.0998936						100.287	0.734415			105.432	0.772092			79.243	0.580307			42.978	0.314733
		25.228	0.928562				10.216	0.376018			6.486	0.238729			3.204	0.117929			5.727	0.210792			7.698	0.283339			7.599	0.279695						10.121	0.0741174			132.137	0.967656			119.893	0.877992			32.648	0.239085
		35.053	1.29019				11.046	0.406568			6.448	0.23733			5.031	0.185175			4.705	0.173176			9.791	0.360375			10.417	0.383416						135.082	0.989223			79.202	0.580006			98.134	0.718648			44.13	0.32317
		34.395	1.26597				5.647	0.207848			7.151	0.263205			7.6	0.279732			2.941	0.108249			9.7	0.357026			9.99	0.3677						71.37	0.522652			114.896	0.841398			47.464	0.347585			38.77	0.283918
		31.845	1.17211				11.048	0.406641			5.082	0.187052			4.922	0.181163			7.975	0.293534			14.319	0.527036			2.916	0.107329						175.997	1.28885			109.399	0.801143			111.962	0.819912			52.247	0.382611
		26.234	0.965589				13.591	0.500241			8.662	0.31882			3.141	0.11561			12.54	0.461557			15.455	0.568849			11.571	0.425891						125.047	0.915735			94.025	0.688557			54.775	0.401124			48.421	0.354593
		20.755	0.763925				12.1	0.445362			5.012	0.184476			14.55	0.535539			7.826	0.28805			12.4	0.456404			11.927	0.438995						95.565	0.699835			48.391	0.354373			57.209	0.418949			51.197	0.374922
		34.257	1.26089				13.222	0.486659			5.409	0.199088			4.443	0.163533			3.481	0.128124			8.111	0.29854			7.943	0.292356						136.942	1.00284			87.962	0.644157			56.631	0.414716			49.177	0.360129
		16.16	0.594798				3.736	0.13751			10.428	0.383821			9.22	0.339359			5.51	0.202805			9.375	0.345064			8.056	0.296515						85.2	0.62393			116.839	0.855627			51.902	0.380085			42.935	0.314418
		35.565	1.30903				1.911	0.0703378			5.412	0.199198			9.548	0.351431			1.327	0.0488426			13.246	0.487543			3.173	0.116788						179.919	1.31757			128.482	0.94089			68.057	0.49839			44.373	0.324949
		42.881	1.57831				13.168	0.484672			12.382	0.455742			3.322	0.122272			8.063	0.296773			11.473	0.422284			15.106	0.556003						84.17	0.616388			81.849	0.599391			61.126	0.447634			63.256	0.463232
		19.055	0.701353				11.828	0.435351			12.846	0.47282			10.392	0.382496			10.011	0.368473			14.462	0.5323			4.825	0.177593						136.782	1.00167			107.298	0.785757			41.021	0.300402			54.847	0.401652
		31.161	1.14694				2.436	0.0896613			8.843	0.325482			7.936	0.292099			15.598	0.574112			10.533	0.387686			6.088	0.22408						178.087	1.30415			9.878	0.0723379			46.412	0.339881			47.878	0.350617
		40.176	1.47875				8.571	0.315471			4.967	0.182819			12.038	0.44308			1.174	0.0432112			1.424	0.0524129			6.907	0.254224						167.279	1.22501			77.411	0.566891			36.327	0.266027			49.813	0.364787
		34.405	1.26634				13.186	0.485334			5.166	0.190144			11.37	0.418493			16.301	0.599987			4.228	0.155619			11.36	0.418125						76.105	0.557327			12.797	0.0937141			68.152	0.499086			61.933	0.453543
		29.381	1.08142				3.847	0.141596			3.853	0.141817			7.805	0.287277			16.6	0.610993			3.223	0.118628			4.986	0.183519						112.933	0.827023			149.59	1.09547			35.227	0.257972			54.576	0.399667
		36.367	1.33855				14.109	0.519307			11.032	0.406052			11.735	0.431928			1.146	0.0421806			10.397	0.38268			2.158	0.079429						66.634	0.487969			27.753	0.203239			64.452	0.47199			71.608	0.524395
		28.999	1.06736				18.139	0.667638			11.234	0.413487			6.025	0.221761			10.602	0.390226			7.567	0.278517			3.463	0.127462						142.616	1.0444			58.778	0.430439			38.803	0.284159			41.369	0.30295
		28.676	1.05547				15.825	0.582467			7.358	0.270824			10.38	0.382054			12.949	0.476611			6.061	0.223086			2.643	0.0972803						143.619	1.05174			73.094	0.535277			48.004	0.351539			56.183	0.411435
		32.044	1.17944				2.273	0.0836618			3.979	0.146454			6.558	0.241379			8.061	0.296699			2.805	0.103243			1.343	0.0494315						127.065	0.930513			53.095	0.388821			43.776	0.320577			46.854	0.343118
		28.987	1.06692				7.64	0.281204			4.223	0.155435			5.617	0.206744			5.71	0.210167			3.703	0.136296			7.805	0.287277						97.323	0.712709			60.363	0.442046			39.234	0.287316			58.451	0.428044
		33.824	1.24495				12.794	0.470906			11.553	0.425229			10.739	0.395268			1.633	0.0601055			12.303	0.452834			9.706	0.357247						138.831	1.01668			37.131	0.271915			34.908	0.255636			65.952	0.482975
		35.743	1.31558				2.241	0.082484			8.685	0.319667			15.635	0.575474			2.762	0.10166			3.834	0.141117			15.489	0.5701						151.924	1.11256			154.066	1.12825			29.955	0.219364			47.229	0.345864
		32.252	1.18709				1.573	0.0578971			11.729	0.431707			6.085	0.223969			2.134	0.0785457			4.328	0.1593			1.181	0.0434688						146.496	1.07281			26.952	0.197373			41.612	0.30473			64.566	0.472825
		26.349	0.969822				3.503	0.128934			10.8	0.397513			18.083	0.665577			1.445	0.0531858			3.013	0.110899			15.601	0.574223						165.551	1.21235			71.499	0.523596			31.845	0.233205			69.519	0.509097
		32.383	1.19191				2.346	0.0863487			8.189	0.301411			2.869	0.105599			2.275	0.0837354			2.972	0.10939			10.188	0.374988						82.283	0.602569			21.506	0.157491			38.303	0.280498			41.703	0.305396
		33.823	1.24492				3.628	0.133535			10.172	0.374399			7.987	0.293976			2.27	0.0835514			4.637	0.170673			10.213	0.375908						76.873	0.562951			114.978	0.841999			33.849	0.247881			35.623	0.260872
		39.483	1.45324				2.342	0.0862015			4.512	0.166072			12.241	0.450552			2.375	0.0874161			2.462	0.0906183			7.038	0.259046						124.213	0.909628			116.302	0.851694			35.613	0.260799			36.082	0.264233
		30.666	1.12872				3.267	0.120248			9.812	0.361148			12.357	0.454821			2.171	0.0799075			2.783	0.102433			5.323	0.195923						145.594	1.0662			16.589	0.121483			43.026	0.315085			35.613	0.260799
		32.524	1.1971				2.693	0.0991207			4.161	0.153153			11.335	0.417205			1.985	0.0730615			6.436	0.236888			1.574	0.0579339						150.64	1.10316			116.663	0.854338			7.293	0.0534076			7.517	0.055048
		29.295	1.07825				1.896	0.0697857			10.242	0.376975			5.767	0.212265			1.594	0.05867			8.998	0.331187			2.62	0.0964338						71.181	0.521268			66.397	0.486234			10.222	0.074857			9.73	0.071254
		35.7	1.314				2.22	0.0817111			5.987	0.220362			13.627	0.501566			1.045	0.0384631			8.06	0.296663			2.324	0.085539						92.969	0.680824			72.816	0.533241			32.716	0.239583			27.169	0.198962
		27.691	1.01922				1.359	0.0500204			9.655	0.35537			14.667	0.539845			2.443	0.089919			8.941	0.329089			2.036	0.0749386						136.422	0.999036			57.291	0.419549			27.868	0.204081			37.961	0.277993
		27.783	1.0226				4.673	0.171998			5.13	0.188819			2.521	0.0927899			2.196	0.0808277			3.643	0.134087			1.401	0.0515663						123.954	0.907731			22.224	0.162749			59.098	0.432782			67.735	0.496032
		23.971	0.882295				6.034	0.222092			9.86	0.362915			4.588	0.16887			1.695	0.0623875			1.255	0.0461925			2.183	0.0803492						158.079	1.15763			102.675	0.751902			61.767	0.452328			51.846	0.379675
		33.226	1.22294				8.458	0.311312			5.955	0.219184			10.246	0.377122			2.061	0.0758588			3.409	0.125474			2.218	0.0816375						131.357	0.961944			75.169	0.550472			8.568	0.0627446			19.275	0.141153
		27.207	1.0014				5.346	0.196769			4.452	0.163864			5.164	0.19007			2.213	0.0814534			1.237	0.04553			2.118	0.0779568						117.749	0.862291			126.706	0.927884			42.842	0.313737			51.529	0.377353
		34.134	1.25636				5.796	0.213332			10.49	0.386103			10.338	0.380509			1.308	0.0481433			2.132	0.0784721			1.317	0.0484745						144.881	1.06098			12.77	0.0935163			45.48	0.333056			3.588	0.0262754
		29.442	1.08367				6.989	0.257243			10.774	0.396556			11.374	0.41864			2.713	0.0998568			2.416	0.0889252			2.288	0.0842139						135.868	0.994979			75.894	0.555781			41.215	0.301823			118.351	0.866699
		32.197	1.18507				8.673	0.319225			5.308	0.19537			10.103	0.371859			1.746	0.0642646			2.779	0.102286			2.05	0.0754539						130.439	0.955221			13.042	0.0955082			45.584	0.333817			31.081	0.22761
		35.86	1.31989				6.024	0.221724			4.878	0.179544			4.947	0.182083			3.285	0.12091			3.551	0.130701			1.87	0.0688287						99.867	0.731339			27.046	0.198061			24.115	0.176597			72.244	0.529052
		2.014	0.0741289				8.52	0.313594			3.543	0.130406			9.556	0.351726			2.149	0.0790978			2.633	0.0969123			1.577	0.0580443						112.283	0.822263			131.229	0.961007			44.385	0.325037			41.163	0.301442
		13.752	0.506167				10.064	0.370423			4.791	0.176341			6.127	0.225515			2.021	0.0743865			6.222	0.229012			0.922	0.0339359						109.161	0.7994			13.325	0.0975807			51.452	0.37679			29.591	0.216699
		23.03	0.84766				7.443	0.273953			3.306	0.121683			3.609	0.132836			2.444	0.0899558			6.694	0.246385			2.366	0.0870849						100.239	0.734063			61.145	0.447773			35.411	0.259319			83.555	0.611884
		28.013	1.03107				13.761	0.506498			15.151	0.55766			4.872	0.179323			1.959	0.0721045			5.948	0.218927			1.995	0.0734295						82.068	0.600994			76.222	0.558183			59.912	0.438743			39.089	0.286254
		23.652	0.870554				9.64	0.354817			6.085	0.223969			12.644	0.465385			7.34	0.270162			2.647	0.0974276			2.082	0.0766317						99.478	0.72849			54.41	0.398451			35.043	0.256624			80.151	0.586956
		24.25	0.892565				2.321	0.0854285			5.75	0.211639			5.753	0.211749			2.36	0.086864			1.171	0.0431007			1.987	0.0731351						88.12	0.645314			11.115	0.0813966			66.591	0.487654			39.161	0.286781
		28.062	1.03287				18.459	0.679416			6.176	0.227319			7.152	0.263242			1.99	0.0732455			2.341	0.0861647			1.308	0.0481433						148.74	1.08924			11.871	0.0869329			42.221	0.30919			59.882	0.438524
		21.284	0.783396				9.32	0.343039			3.896	0.143399			0.911	0.033531			2.674	0.0984213			7.64	0.281204			1.025	0.037727						140.69	1.03029			9.005	0.0659448			43.566	0.319039			60.172	0.440647
		25.286	0.930696				12.02	0.442418			8.433	0.310392			1.333	0.0490634			2.198	0.0809013			1.486	0.0546949			2.493	0.0917593						123.519	0.904545			74.917	0.548627			42.932	0.314397			71.128	0.520879
		8.088	0.297693				14.521	0.534471			14.916	0.54901			2.477	0.0911704			1.664	0.0612465			1.708	0.062866			1.718	0.0632341						139.551	1.02195			46.495	0.340489			33.653	0.246445			71.457	0.523289
		31.78	1.16972				10.283	0.378484			6.353	0.233834			1.524	0.0560935			8.934	0.328832			2.692	0.0990839			1.385	0.0509774						129.82	0.950688			70.227	0.514281			42.459	0.310933			64.539	0.472627
		14.203	0.522767				12.22	0.449779			5.081	0.187015			1.709	0.0629028			1.667	0.0613569			3.137	0.115463			3.16	0.116309						140.517	1.02902			28.725	0.210357			16.897	0.123739			35.264	0.258243
		21.589	0.794622				2.342	0.0862015			7.675	0.282492			8.962	0.329862			1.74	0.0640438			2.75	0.101219			2.127	0.078288						163.216	1.19525			54.513	0.399206			19.249	0.140963			39.123	0.286503
		30.329	1.11631				11.198	0.412162			19.403	0.714162			9.369	0.344843			2.464	0.0906919			1.36	0.0500572			1.872	0.0689023						137.517	1.00705			119.281	0.87351			51.077	0.374043			63.66	0.46619
		25.531	0.939714				8.366	0.307926			3.788	0.139424			26.475	0.97446			8.941	0.329089			3.177	0.116935			1.025	0.037727						136.597	1.00032			75.683	0.554236			42.441	0.310801			88.02	0.644582
		23.978	0.882553				7.598	0.279658			14.683	0.540434			28.229	1.03902			0.847	0.0311753			2.585	0.0951455			2.274	0.0836986						49.365	0.361506			44.517	0.326004			36.437	0.266833			63.722	0.466644
		23.349	0.859402				9.537	0.351026			19.423	0.714898			1.706	0.0627924			2.188	0.0805332			2.643	0.0972803			1.843	0.0678349						147.906	1.08313			49.343	0.361345			39.767	0.291219			58.846	0.430937
		1.891	0.0696016				13.447	0.494941			8.355	0.307521			10.338	0.380509			8.464	0.311533			2.626	0.0966546			6.995	0.257463						143.312	1.04949			119.953	0.878431			37.589	0.275269			59.484	0.435609
		32.314	1.18937				14.963	0.55074			8.741	0.321728			8.542	0.314404			12.201	0.44908			3.363	0.123781			2.239	0.0824104						162.373	1.18908			76.177	0.557854			56.014	0.410198			73.129	0.535533
		22.212	0.817552				0.625	0.0230042			8.373	0.308183			21.52	0.792082			2.357	0.0867536			5.582	0.205455			1.958	0.0720677						115.398	0.845074			58.858	0.431025			33.449	0.244951			75.347	0.551776
		16.222	0.59708				9.563	0.351983			6.349	0.233686			1.984	0.0730247			12.371	0.455337			2.832	0.104237			2.546	0.0937101						126.084	0.923329			52.239	0.382553			16.791	0.122963			42.613	0.31206
		18.876	0.694765				20.521	0.755312			7.412	0.272812			8.355	0.307521			3.452	0.127057			1.684	0.0619826			2.456	0.0903975						108.926	0.797679			70.858	0.518902			40.438	0.296133			74.847	0.548114
		28.168	1.03677				16.295	0.599767			4.667	0.171777			4.103	0.151018			9.112	0.335383			2.978	0.109611			1.988	0.0731719						130.748	0.957484			46.806	0.342766			29.863	0.218691			33.262	0.243582
		30.06	1.10641				2.554	0.0940045			4.454	0.163937			7.368	0.271192			3.638	0.133903			2.35	0.0864959			1.639	0.0603263						52.545	0.384794			56.003	0.410117			32.819	0.240338			84.76	0.620708
		32.755	1.20561				20.007	0.736393			5.46	0.200965			15.098	0.555709			10.062	0.37035			2.357	0.0867536			1.744	0.064191						71.751	0.525442			56.357	0.41271			37.257	0.272838			63.353	0.463942
		43.511	1.6015				22.438	0.825871			5.249	0.193199			22.365	0.823184			2.792	0.102765			9	0.331261			1.418	0.052192						154.18	1.12908			47.299	0.346377			39.977	0.292757			46.7	0.34199
		24.88	0.915753				16.592	0.610698			3.843	0.141448			16.333	0.601165			11.424	0.420481			2.034	0.074865			8.174	0.300859						91.586	0.670696			78.135	0.572193			41.985	0.307462			76.023	0.556726
		27.937	1.02827				17.668	0.650302			4.493	0.165373			14.342	0.527883			11.853	0.436271			9.975	0.367148			1.665	0.0612833						131.818	0.96532			67.408	0.493637			67.354	0.493242			60.281	0.441445
		27.748	1.02131				11.424	0.420481			4.971	0.182967			14.61	0.537747			0.971	0.0357394			9.362	0.344585			2.3	0.0846556						137.828	1.00933			80.986	0.593071			25.471	0.186527			28.497	0.208687
		29.829	1.09791				8.34	0.306969			4.915	0.180905			21.257	0.782402			5.539	0.203873			2.635	0.0969859			8.08	0.297399						102.014	0.747062			52.765	0.386405			25.85	0.189303			59.303	0.434283
		10.249	0.377233				13.942	0.51316			5.83	0.214584			23.017	0.847182			9.378	0.345174			1.262	0.0464502			0.91	0.0334942						87.534	0.641023			60.461	0.442764			69.556	0.509367			70.295	0.514779
		12.405	0.456588				7.239	0.266444			3.844	0.141485			19.605	0.721597			8.503	0.312968			2.202	0.0810485			2.027	0.0746074						117.767	0.862423			112.057	0.820608			13.956	0.102202			55.492	0.406375
		30.814	1.13416				18.533	0.68214			5.161	0.18996			11.281	0.415217			8.877	0.326734			9.544	0.351284			7.994	0.294233						91.756	0.671941			42.593	0.311914			68.595	0.50233			77.026	0.564071
		23.818	0.876664				6.868	0.252789			5.597	0.206008			15.526	0.571462			9.309	0.342634			7.03	0.258752			11.681	0.42994						151.257	1.10767			73.814	0.540549			32.682	0.239334			54.408	0.398437
		25.899	0.953259				10.9	0.401194			8.75	0.322059			19.755	0.727118			9.666	0.355774			3.702	0.136259			2.14	0.0787665						142.528	1.04375			66.149	0.484418			34.434	0.252165			70.271	0.514604
		24.201	0.890761				11.978	0.440872			5.569	0.204977			15.024	0.552985			11.378	0.418788			1.153	0.0424382			11.961	0.440246						108.771	0.796544			83.252	0.609665			58.678	0.429706			100.942	0.739211
		27.138	0.998863				19.932	0.733633			9.125	0.335862			16.991	0.625384			6.716	0.247194			10.63	0.391256			3.267	0.120248						59.72	0.437337			60.058	0.439812			42.172	0.308831			89.319	0.654094
		18.807	0.692225				12.072	0.444332			5.574	0.205161			14.915	0.548973			6.566	0.241673			5.168	0.190217			3.459	0.127315						93.158	0.682208			31.643	0.231726			66.109	0.484125			82.382	0.603294
		14.529	0.534766				9.122	0.335751			5.43	0.199861			12.063	0.444			3.06	0.112629			1.261	0.0464134			9.324	0.343186						19.702	0.14428			64.946	0.475608			28.079	0.205626			63.605	0.465788
		16.677	0.613827				1.029	0.0378742			5.5	0.202437			17.563	0.646438			1.789	0.0658473			5.541	0.203946			8.893	0.327323						136.603	1.00036			37.524	0.274793			59.505	0.435763			63.272	0.463349
		14.96	0.55063				14.003	0.515405			8.679	0.319446			1.947	0.0716628			1.857	0.0683502			4.924	0.181237			2.289	0.0842507						85.122	0.623359			43.441	0.318124			41.699	0.305367			70.311	0.514896
		0.882	0.0324636				13.339	0.490966			4.775	0.175752			7.987	0.293976			5.13	0.188819			6.337	0.233245			1.955	0.0719573						102.285	0.749046			48.796	0.357339			31.609	0.231477			45.563	0.333664
		1.31	0.0482169				20.905	0.769446			4.895	0.180169			11.67	0.429535			18.005	0.662706			5.303	0.195186			2.703	0.0994887						129.649	0.949436			38.455	0.281611			52.376	0.383556			84.311	0.61742
		12.016	0.44227				14.517	0.534324			6.677	0.245759			15.653	0.576137			8.577	0.315692			3.201	0.117819			10.939	0.402629						147.898	1.08308			51.334	0.375925			47.212	0.34574			54.447	0.398722
		9.902	0.364461				12.624	0.464649			5.865	0.215872			17.919	0.659541			1.117	0.0411132			9.201	0.338659			1.68	0.0618354						141.451	1.03586			90.617	0.6636			140.131	1.0262			93.405	0.684017
		12.609	0.464097				17.862	0.657443			6.123	0.225368			15.811	0.581952			3.177	0.116935			2.772	0.102028			11.465	0.42199						92.158	0.674885			64.026	0.468871			8.375	0.0613312			51.827	0.379536
		10.111	0.372153				10.458	0.384925			4.214	0.155104			9.593	0.353087			9.135	0.33623			6.843	0.251869			0.904	0.0332733						129.646	0.949414			31.659	0.231843			120.235	0.880496			54.878	0.401879
		10.882	0.400531				1.293	0.0475912			4.608	0.169606			11.738	0.432038			6.669	0.245464			7.569	0.278591			5.22	0.192131						163.247	1.19548			45.944	0.336454			46.604	0.341287			50.931	0.372974
		3.058	0.112555				11.571	0.425891			5.066	0.186463			13.257	0.487948			1.246	0.0458613			1.236	0.0454932			8.686	0.319704						11.993	0.0878263			50.604	0.37058			31.733	0.232385			59.355	0.434664
		1.367	0.0503149				0.782	0.0287829			5.219	0.192095			14.181	0.521957			9.058	0.333396			1.445	0.0531858			7.882	0.290111						11.093	0.0812355			69.582	0.509558			77.756	0.569417			83.167	0.609043
		6.637	0.244287				9.432	0.347162			4.548	0.167397			24.629	0.906514			7.4	0.27237			4.119	0.151607			8.652	0.318452						107.539	0.787522			110.364	0.80821			87.666	0.641989			29.515	0.216142
		7.153	0.263279				17.614	0.648315			5.916	0.217749			22.94	0.844348			1.189	0.0437633			4.908	0.180648			8.722	0.321029						139.114	1.01875			57.012	0.417506			80.193	0.587264			61.936	0.453565
		1.366	0.0502781				4.138	0.152306			5.935	0.218448			22.408	0.824766			2.24	0.0824472			10.156	0.37381			11.139	0.409991						146.247	1.07099			132.237	0.968388			98.557	0.721746			41.894	0.306795
		30.513	1.12309				1.361	0.050094			5.133	0.188929			15.275	0.562224			2.877	0.105893			2.929	0.107807			9.195	0.338438						144.959	1.06155			80.929	0.592653			91.008	0.666463			77.412	0.566898
		29.466	1.08455				1.369	0.0503885			4.859	0.178844			20.837	0.766943			5.072	0.186684			5.287	0.194597			6.42	0.2363						2.805	0.0205414			71.455	0.523274			90.843	0.665255			87.401	0.640049
		1.21	0.0445362				1.704	0.0627188			5.244	0.193015			13.985	0.514743			3.362	0.123744			2.801	0.103096			6.36	0.234091						139.588	1.02222			117.826	0.862855			56.801	0.415961			38.02	0.278425
		1.238	0.0455668				9.508	0.349959			11.81	0.434688			23.161	0.852482			3.965	0.145939			1.743	0.0641542			2.701	0.0994151						154.551	1.1318			42.075	0.308121			49.552	0.362876			85.988	0.629701
		25.909	0.953627				0.86	0.0316538			5.674	0.208842			11.825	0.43524			4.469	0.16449			2.914	0.107255			1.552	0.0571241						147.32	1.07884			86.931	0.636607			47.912	0.350866			63.1	0.462089
		30.001	1.10424				1.023	0.0376533			10.808	0.397808			19.554	0.71972			4.078	0.150098			3.309	0.121794			1.788	0.0658105						97.176	0.711632			53.503	0.391809			76.91	0.563222			67.548	0.494663
		31.407	1.15599				2.326	0.0856126			5.081	0.187015			20.158	0.741951			6.623	0.243771			5.69	0.209431			3.982	0.146565						144.425	1.05764			28.14	0.206073			87.758	0.642663			58.341	0.427239
		35.086	1.2914				1.458	0.0536643			4.7	0.172992			28.323	1.04248			3.185	0.11723			4.19	0.15422			8.104	0.298282						106.523	0.780082			57.331	0.419842			57.385	0.420238			45.094	0.330229
		29.288	1.078				2.946	0.108433			5.365	0.197468			24.026	0.88432			1.624	0.0597742			5.192	0.191101			17.682	0.650818						121.114	0.886933			54.412	0.398466			73.688	0.539627			38.626	0.282863
		19.004	0.699476				1.203	0.0442786			3.854	0.141853			13.151	0.484046			4.192	0.154294			5.906	0.217381			1.127	0.0414812						158.216	1.15864			46.072	0.337391			89.346	0.654292			60.074	0.43993
		27.313	1.0053				1.445	0.0531858			3.997	0.147117			23.838	0.8774			3.754	0.138173			1.813	0.0667307			3.093	0.113843						109.476	0.801707			46.533	0.340767			91.4	0.669334			36.973	0.270758
		25.566	0.941002				2.155	0.0793186			7.695	0.283228			15.646	0.575879			0.868	0.0319483			1.423	0.0523761			8.421	0.30995						130.097	0.952717			67.015	0.490759			67.428	0.493784			47.829	0.350258
		22.33	0.821896				2.438	0.0897349			4.463	0.164269			23.989	0.882958			1.004	0.036954			3.024	0.111304			6.222	0.229012						91.719	0.67167			63.616	0.465868			88.742	0.649869			38.209	0.279809
		34.888	1.28412				4.367	0.160735			4.297	0.158159			8.073	0.297141			5.755	0.211823			3.895	0.143362			1.158	0.0426223						83.965	0.614886			64.536	0.472605			42.799	0.313423			31.343	0.229529
		40.674	1.49708				7.987	0.293976			31.693	1.16652			12.062	0.443963			10.452	0.384705			1.465	0.0539219			8.564	0.315213						120.853	0.885022			46.571	0.341045			34.122	0.24988			43.29	0.317018
		33.062	1.21691				7.062	0.25993			27.032	0.994961			28.733	1.05757			10.394	0.38257			2.461	0.0905815			0.98	0.0360706						84.639	0.619822			41.676	0.305199			76.488	0.560131			65.833	0.482103
		27.436	1.00983				4.581	0.168612			4.368	0.160772			12.471	0.459017			3.062	0.112702			8.924	0.328464			6.997	0.257537						122.297	0.895597			66.539	0.487274			44.103	0.322972			28.627	0.209639
		26.617	0.979686				1.685	0.0620194			14.265	0.525049			10.454	0.384778			1.18	0.043432			2.977	0.109574			1.111	0.0408923						87.676	0.642063			30.76	0.225259			41.101	0.300988			55.117	0.403629
		37.586	1.38342				6.047	0.222571			9.751	0.358903			14.182	0.521994			1.182	0.0435056			1.391	0.0511982			2.225	0.0818951						105.013	0.769024			55.545	0.406763			51.736	0.378869			67.167	0.491873
		36.387	1.33929				7.872	0.289743			25.641	0.943763			14.923	0.549268			1.583	0.0582651			1.293	0.0475912			2.647	0.0974276						174.353	1.27681			41.235	0.301969			35.291	0.258441			30.852	0.225933
		35.94	1.32284				4.093	0.15065			34.554	1.27182			10.905	0.401378			10.288	0.378668			4.768	0.175495			4.924	0.181237						87.768	0.642736			93.193	0.682464			55.066	0.403255			41.246	0.30205
		32.325	1.18978				7.211	0.265414			13.466	0.49564			19.401	0.714088			5.565	0.20483			3.784	0.139277			3.156	0.116162						167.553	1.22701			36.962	0.270677			58.038	0.42502			45.568	0.3337
		34.751	1.27907				1.798	0.0661786			22.216	0.8177			21.809	0.802719			1.39	0.0511614			3.949	0.14535			3.753	0.138136						63.679	0.466329			36.746	0.269096			45.075	0.33009			35.371	0.259026
		28.985	1.06684				13.195	0.485666			12.772	0.470096			10.681	0.393133			0.982	0.0361443			2.05	0.0754539			4.284	0.15768						137.571	1.00745			61.984	0.453917			72.827	0.533321			36.342	0.266137
		27.551	1.01406				6.545	0.2409			13.151	0.484046			10.016	0.368657			4.304	0.158416			3.636	0.133829			4.707	0.17325						8.378	0.0613532			102.286	0.749053			47.996	0.351481			34.329	0.251396
		2.68	0.0986422				3.596	0.132357			28.024	1.03147			13.072	0.481138			6.184	0.227613			3.361	0.123708			2.897	0.106629						12.38	0.0906603			69.243	0.507075			38.925	0.285053			32.719	0.239605
		41.199	1.5164				12.782	0.470464			12.564	0.46244			9.471	0.348597			3.502	0.128897			3.771	0.138798			1.589	0.058486						120.513	0.882532			42.252	0.309417			51.11	0.374285			77.132	0.564847
		28.736	1.05768				13.48	0.496155			13.325	0.49045			8.999	0.331224			1.163	0.0428063			2.609	0.0960289			3.686	0.13567						15.25	0.111678			51.415	0.376519			48.009	0.351576			54.307	0.397697
		33.842	1.24562				10.158	0.373883			15.001	0.552139			12.327	0.453717			1.339	0.0492843			6.45	0.237404			1.033	0.0380214						129.095	0.945379			42.011	0.307652			49.875	0.365241			44.774	0.327886
		34.186	1.25828				11.013	0.405353			10.403	0.382901			0.981	0.0361075			0.944	0.0347456			4.596	0.169164			1.325	0.048769						126.333	0.925153			32.081	0.234933			65.739	0.481415			70.75	0.518111
		26.709	0.983072				8.443	0.31076			12.456	0.458465			23.004	0.846703			0.67	0.0246605			3.658	0.134639			1.019	0.0375061						79.875	0.584935			34.22	0.250597			65.491	0.479599			47.253	0.34604
		1.874	0.0689759				10.396	0.382643			1.596	0.0587436			6.817	0.250912			0.971	0.0357394			3.52	0.12956			5.56	0.204646						143.907	1.05385			52.665	0.385673			44.221	0.323836			59.658	0.436883
							8.308	0.305791			10.786	0.396998			15.293	0.562886			1.299	0.047812			2.674	0.0984213			10.169	0.374288						122.199	0.894879			56.224	0.411736			44.702	0.327358			56.195	0.411523
							6.642	0.244471			13.215	0.486402			7.748	0.285179			1.041	0.0383159			6.97	0.256543			2.813	0.103537						93.144	0.682105			55.9	0.409363			43.69	0.319947			55.734	0.408147
							11.947	0.439731			13.766	0.506682			11.707	0.430897			1.439	0.052965			2.067	0.0760796			9.59	0.352977						115.026	0.84235			51.994	0.380759			51.352	0.376057			38.185	0.279634
							3.337	0.122824			8.83	0.325004			16.198	0.596196			1.893	0.0696752			3.934	0.144798			1.59	0.0585228						136.502	0.999622			33.337	0.244131			33.818	0.247654			51.991	0.380737
							2.934	0.107991			17.459	0.64261			9.564	0.35202			1.436	0.0528545			3.883	0.142921			9.778	0.359897						120.718	0.884033			50.67	0.371063			22.303	0.163328			22.841	0.167268
							4.605	0.169495			14.254	0.524644			15.773	0.580553			2.075	0.0763741			5.016	0.184623			1.46	0.0537379						161.146	1.18009			36.497	0.267272			36.303	0.265852			25.3	0.185275
							9.891	0.364056			10.416	0.383379			14.416	0.530607			3.828	0.140896			3.94	0.145019			5.282	0.194413						148.382	1.08662			45.96	0.336571			36.253	0.265485			28.701	0.210181
							10.49	0.386103			13.187	0.485371			9.551	0.351542			2.697	0.0992679			4.228	0.155619			0.993	0.0365491						112.869	0.826554			68.948	0.504915			50.841	0.372315			21.182	0.155118
							5.657	0.208216			14.17	0.521552			14.226	0.523613			1.16	0.0426959			3.847	0.141596			5.258	0.19353						137.78	1.00898			45.239	0.331291			35.369	0.259012			29.895	0.218925
							2.875	0.10582			14.171	0.521589			10.51	0.386839			2.506	0.0922378			14.04	0.516767			3.426	0.1261						160.501	1.17537			44.014	0.32232			37.665	0.275826			24.163	0.176949
							10.01	0.368436			20.351	0.749055			5.956	0.219221			2.379	0.0875633			4.215	0.155141			1.179	0.0433952						134.379	0.984075			57.759	0.422977			30.993	0.226966			43.855	0.321156
							11.205	0.41242			15.062	0.554384			10.929	0.402261			2.553	0.0939677			1.652	0.0608048			1.364	0.0502045						177.477	1.29969			71.512	0.523692			17.966	0.131567			42.856	0.31384
							1.183	0.0435424			14.352	0.528251			7.231	0.26615			1.927	0.0709267			13.111	0.482574			3.259	0.119953						132.561	0.970761			37.521	0.274771			34.294	0.251139			18.661	0.136657
							19.205	0.706874			11.445	0.421254			8.97	0.330157			2.325	0.0855758			6.155	0.226546			0.845	0.0311017						197.355	1.44526			21.302	0.155997			43.44	0.318117
							11.402	0.419671			16.151	0.594466			15.732	0.579044			2.027	0.0746074			3.912	0.143988			1.274	0.0468918						9.851	0.0721401			50.754	0.371678			57.759	0.422977
							11.016	0.405464			23.219	0.854617			14.994	0.551881			2.774	0.102102			1.409	0.0518608			0.953	0.0350769						18.714	0.137045			49.944	0.365746			32.254	0.2362
							12.402	0.456478			15.531	0.571646			10.128	0.372779			2.19	0.0806069			3.62	0.133241			1.063	0.0391256						96.078	0.703591			49.902	0.365439			28.45	0.208343
							6.248	0.229969			19.058	0.701464			14.778	0.543931			1.979	0.0728406			4.117	0.151534			1.44	0.0530018						131.351	0.9619			126.114	0.923549			46.904	0.343484
							5.653	0.208069			18.562	0.683208			1.911	0.0703378			2.635	0.0969859			1.69	0.0622035			2.008	0.073908						127.672	0.934958			40.736	0.298315			26.476	0.193887
							1.219	0.0448675			12.737	0.468808			11.895	0.437817			3.112	0.114543			4.364	0.160625			2.107	0.0775519						168.175	1.23157			115.592	0.846495			35.57	0.260484
							11.976	0.440798			1.654	0.0608784			11.776	0.433437			3.462	0.127425			3.519	0.129523			3.61	0.132872						94.04	0.688667			113.08	0.828099			42.769	0.313203
							3.276	0.120579			1.746	0.0642646			13.311	0.489935			2.343	0.0862383			4.817	0.177298			2.56	0.0942254						156.316	1.14472			41.146	0.301317			22.053	0.161497
							4.765	0.175384			1.689	0.0621667			9.701	0.357063			2.243	0.0825576			2.807	0.103317			1.122	0.0412972						164.142	1.20203			123.268	0.902707			23.823	0.174459
							11.657	0.429057			17.329	0.637825			11.148	0.410322			2.436	0.0896613			4.216	0.155177			2.449	0.0901398						152.577	1.11734			37.76	0.276521			42.698	0.312683
							5.221	0.192168			1.717	0.0631973			12.307	0.452981			2.471	0.0909496			4.405	0.162134			2.243	0.0825576						172.542	1.26355			35.94	0.263193			56.448	0.413376
							5.691	0.209467			16.131	0.59373			11.714	0.431155			3.407	0.125401			5.001	0.184071			2.352	0.0865696						44.006	0.322262			65.61	0.48047			39.052	0.285983
							3.501	0.128861			1.575	0.0579707			8.308	0.305791			2.336	0.0859807			3.211	0.118187			1.786	0.0657369						136.117	0.996802			21.491	0.157381			31.836	0.233139
							8.925	0.328501			27.767	1.02201			10.999	0.404838			2.622	0.0965074			11.225	0.413156			2.259	0.0831465						120.353	0.88136			12.533	0.0917808			43.771	0.320541
							7.568	0.278554			16.891	0.621703			15.673	0.576873			2.47	0.0909128			3.201	0.117819			2.703	0.0994887						125.397	0.918298			41.385	0.303068			31.273	0.229016
							11.894	0.43778			25.493	0.938315			10.05	0.369908			1.913	0.0704114			3.549	0.130627			1.988	0.0731719						97.206	0.711852			44.201	0.32369			36.061	0.264079
							3.78	0.13913			19.525	0.718652			10.545	0.388128			2.243	0.0825576			1.554	0.0571977			1.918	0.0705954						103.115	0.755124			65.66	0.480837			45.134	0.330522
							8.717	0.320845			15.106	0.556003			14.707	0.541317			2.054	0.0756011			2.022	0.0744233			2.467	0.0908023						9.363	0.0685664			45.201	0.331013			25.807	0.188988
							6.572	0.241894			16.164	0.594945			15.89	0.58486			2.48	0.0912808			3.541	0.130333			2.967	0.109206						138.356	1.0132			56.205	0.411596			42.715	0.312807
							7.138	0.262727			1.361	0.050094			6.023	0.221687			3.984	0.146638			3.605	0.132688			2.093	0.0770366						72.304	0.529491			46.133	0.337838			32.027	0.234538
							14.166	0.521405			1.102	0.0405611			5.497	0.202327			2.294	0.0844348			4.9	0.180353			3.276	0.120579						122.442	0.896658			73.879	0.541025			59.999	0.43938
							3.754	0.138173			25.82	0.950351			11.924	0.438884			2.093	0.0770366			5.149	0.189518			2.268	0.0834778						176.138	1.28988			36.217	0.265222			22.626	0.165693
							10.022	0.368878			1.777	0.0654057			13.109	0.4825			1.79	0.0658841			4.595	0.169127			2.156	0.0793554						96.968	0.710109			41.361	0.302892			49.196	0.360269
							10.626	0.391109			19.147	0.70474			8.298	0.305423			1.815	0.0668043			4.657	0.171409			2.361	0.0869008						139.487	1.02148			66.126	0.484249			34.976	0.256134
							19.585	0.720861			32.473	1.19523			13.922	0.512424			2.47	0.0909128			2.757	0.101476			2.221	0.0817479						84.209	0.616673			38.778	0.283976			27.432	0.200888
							4.772	0.175642			25.939	0.954731			12.286	0.452208			2.895	0.106556			2.393	0.0880786			2.463	0.0906551						182.244	1.3346			66.19	0.484718			26.903	0.197014
							14.09	0.518608			27.236	1.00247			8.784	0.323311			2.315	0.0852077			3.706	0.136406			2.386	0.087821						173.951	1.27387			23.31	0.170702			46.072	0.337391
							8.441	0.310686			22.495	0.827969			16.539	0.608747			2.6	0.0956976			4.571	0.168244			1.881	0.0692336						84.78	0.620855			58.333	0.42718			37.26	0.27286
							11.218	0.412899			4.391	0.161619			9.987	0.367589			2.343	0.0862383			4.534	0.166882			2.145	0.0789506						133.382	0.976773			37.498	0.274603			35.403	0.259261
							13.372	0.49218			25.789	0.94921			13.552	0.498806			2.547	0.0937469			4.044	0.148847			2.414	0.0888516						171.908	1.2589			72.053	0.527653			44.148	0.323301
							6.166	0.226951			4.729	0.174059			12.122	0.446172			2.936	0.108065			2.89	0.106372			3.506	0.129045						76.001	0.556565			34.134	0.249968			142.592	1.04422
							10.883	0.400568			9.65	0.355185			9.655	0.35537			3.091	0.11377			3.089	0.113696			2.239	0.0824104						67.07	0.491162			83.047	0.608164			34.537	0.252919
							2.764	0.101734			9.89	0.364019			9.312	0.342745			3.182	0.117119			3.053	0.112371			1.974	0.0726566						113.178	0.828817			81	0.593173			32.831	0.240426
							8.255	0.30384			10.797	0.397403			13.63	0.501676			2.562	0.094299			2.734	0.10063			1.75	0.0644119						148.437	1.08702			25.858	0.189361			38.445	0.281538
							10.698	0.393759			7.009	0.257979			10.992	0.40458			2.658	0.0978324			2.227	0.0819687			2.346	0.0863487						176.433	1.29204			35.928	0.263105			36.529	0.267507
							9.054	0.333249			10.663	0.392471			13.082	0.481506			1.808	0.0665467			1.214	0.0446834			2.843	0.104642						142.829	1.04596			94.422	0.691464			40.975	0.300065
							8.901	0.327617			8.424	0.31006			10.237	0.376791			3.041	0.111929			1.941	0.071442			2.268	0.0834778						128.049	0.937719			37.209	0.272486			45.173	0.330808
							11.221	0.413009			7.909	0.291105			16.262	0.598552			2.358	0.0867904			3.059	0.112592			2.301	0.0846924						98.339	0.720149			83.947	0.614755			12.949	0.0948272
							15.524	0.571389			13.051	0.480365			11.359	0.418088			2.427	0.0893301			2.43	0.0894405			2.451	0.0902134						140.714	1.03047			28.51	0.208782			38.505	0.281977
							16.686	0.614158			9.401	0.346021			10.329	0.380177			2.146	0.0789874			2.667	0.0981637			2.785	0.102507						150.797	1.10431			18.168	0.133047			102.9	0.75355
							3.37	0.124039			11.069	0.407414			8.248	0.303582			2.596	0.0955504			2.866	0.105488			2.984	0.109831						148.471	1.08727			83.421	0.610903			152.731	1.11847
							1.597	0.0587804			8.675	0.319299			2.347	0.0863855			1.967	0.0723989			2.006	0.0738344			2.3	0.0846556						163.08	1.19426			20.975	0.153603			46.204	0.338358
							13.243	0.487432			8.851	0.325777			14.005	0.515479			2.39	0.0879682			2.473	0.0910232			3.044	0.11204						85.181	0.623791			41.113	0.301076			39.481	0.289124
							10.724	0.394716			8.249	0.303619			15.586	0.573671			2.041	0.0751226			1.203	0.0442786			2.458	0.0904711						76.177	0.557854			32.276	0.236361			123.181	0.90207
							7.596	0.279584			6.378	0.234754			7.518	0.276713			2.726	0.100335			2.479	0.091244			2.476	0.0911336						125.367	0.918079			40.486	0.296484			154.596	1.13213
							10.259	0.377601			4.161	0.153153			2.008	0.073908			2.153	0.079245			1.285	0.0472967			2.793	0.102801						141.519	1.03636			36.562	0.267748			159.739	1.16979
							6.967	0.256433			6.412	0.236005			14.021	0.516068			2.279	0.0838827			1.401	0.0515663			1.736	0.0638966						148.959	1.09085			116.468	0.85291			105.301	0.771133
							13.304	0.489677			6.767	0.249072			1.871	0.0688655			2.288	0.0842139			1.014	0.0373221			2.301	0.0846924						96.001	0.703028			50.636	0.370814			142.424	1.04299
							14.944	0.550041			6.702	0.246679			2.139	0.0787297			2.098	0.0772206			0.921	0.033899			2.348	0.0864223						74.389	0.54476			127.014	0.93014			94.313	0.690666
							9.196	0.338475			14.291	0.526006			1.973	0.0726198			2.343	0.0862383			2.591	0.0953664			2.074	0.0763373						140.659	1.03006			43.829	0.320965			149.016	1.09126
							12.935	0.476096			8.216	0.302405			6.303	0.231993			2.221	0.0817479			2.103	0.0774047			2.61	0.0960657						124.628	0.912667			16.192	0.118576			33.741	0.24709
							12.024	0.442565			9.892	0.364093			4.617	0.169937			2.211	0.0813798			2.747	0.101108			1.913	0.0704114						155.186	1.13645			23.586	0.172723			151.711	1.111
							18.998	0.699255			8.374	0.30822			4.977	0.183187			1.923	0.0707794			2.875	0.10582			2.332	0.0858334						132.408	0.969641			37.136	0.271952			109.806	0.804123
							4.474	0.164674			12.357	0.454821			19.678	0.724284			2.03	0.0747178			2.413	0.0888148			1.913	0.0704114						152.083	1.11372			73.093	0.535269			137.046	1.00361
							0.617	0.0227098			12.641	0.465275			11.258	0.414371			2.73	0.100483			2.75	0.101219			2.231	0.0821159						136.615	1.00045			90.853	0.665328			146.387	1.07201
							9.13	0.336046			12.814	0.471642			2.752	0.101292			1.959	0.0721045			2.589	0.0952928			2.092	0.0769998						131.994	0.966609			125.591	0.919719			107.226	0.78523
							6.701	0.246642			10.555	0.388496			3.261	0.120027			2.334	0.085907			2.572	0.0946671			2.16	0.0795027						100.37	0.735022			122.716	0.898665			120.003	0.878797
							8.304	0.305644			10.094	0.371528			18.804	0.692115			1.076	0.0396041			2.598	0.095624			2.043	0.0751963						110.497	0.809184			66.86	0.489624			36.749	0.269118
							7.291	0.268358			8.074	0.297178			6.304	0.23203			2.526	0.0929739			2.3	0.0846556			2.213	0.0814534						99.304	0.727216			38.736	0.283669			39.43	0.288751
							5.661	0.208363			4.804	0.17682			2.301	0.0846924			5.768	0.212302			2.25	0.0828153			2.012	0.0740553						80.77	0.591489			81.128	0.594111			37.088	0.2716
							5.016	0.184623			10.408	0.383085			2.404	0.0884835			1.472	0.0541796			2.929	0.107807			2.081	0.0765949						97.129	0.711288			18.571	0.135998			123.147	0.901821
							6.52	0.23998			9.559	0.351836			6.539	0.24068			1.006	0.0370276			1.269	0.0467078			1.751	0.0644487						89.326	0.654146			41.166	0.301464			102.541	0.750921
							6.916	0.254556			7.343	0.270272			17.205	0.633261			1.825	0.0671724			1.448	0.0532962			2	0.0736136						149.518	1.09494			89.467	0.655178			29.001	0.212378
							7.315	0.269242			13.112	0.482611			2.834	0.10431			1.54	0.0566824			2.889	0.106335			1.867	0.0687183						140.195	1.02667			56.674	0.415031			71.389	0.522791
							8.464	0.311533			11.256	0.414297			2.934	0.107991			3.401	0.12518			2.242	0.0825208			2.678	0.0985686						121.448	0.889379			54.566	0.399594			36.867	0.269982
							7.434	0.273622			9.266	0.341052			3.909	0.143878			2.362	0.0869376			1.433	0.0527441			2.275	0.0837354						134.132	0.982266			38.191	0.279678			73.925	0.541362
							6.862	0.252568			3.851	0.141743			2.245	0.0826312			3.438	0.126542			2.988	0.109979			1.069	0.0393465						129.112	0.945504			53.488	0.391699			48.634	0.356153
							2.38	0.0876001			14.059	0.517467			2.97	0.109316			3.513	0.129302			2.909	0.107071			1.691	0.0622403						137.574	1.00747			105.778	0.774626			133.118	0.97484
							2.546	0.0937101			11.168	0.411058			4.089	0.150503			3.607	0.132762			2.51	0.092385			5.518	0.2031						167.096	1.22367			62.232	0.455733			52.519	0.384603
							16.101	0.592626			12.14	0.446834			3.598	0.132431			1.55	0.0570505			0.934	0.0343775			1.03	0.037911						132.791	0.972445			107.272	0.785567			51.89	0.379997
							3.099	0.114064			11.42	0.420333			3.042	0.111966			1.499	0.0551734			2.801	0.103096			1.773	0.0652584						134.046	0.981636			58.771	0.430388			73.916	0.541296
							7.984	0.293865			14.913	0.5489			4.701	0.173029			1.238	0.0455668			2.971	0.109353			1.488	0.0547685						46.799	0.342715			91.509	0.670132			152.393	1.11599
							20.829	0.766649			5.306	0.195297			3.463	0.127462			2.444	0.0899558			3.162	0.116383			3.295	0.121278						142.673	1.04481			27.242	0.199497			33.11	0.242469
							9.308	0.342598			11.329	0.416984			3.681	0.135486			2.124	0.0781776			2.809	0.10339			2.288	0.0842139						143.163	1.0484			55.695	0.407862			109.623	0.802783
							6.823	0.251133			6.737	0.247967			3.047	0.11215			2.762	0.10166			2.344	0.0862751			3.333	0.122677						160.067	1.17219			56.125	0.411011			36.226	0.265288
							9.482	0.349002			16.167	0.595055			2.666	0.0981269			1.024	0.0376901			1.595	0.0587068			3.42	0.125879						113.276	0.829535			23.528	0.172299			56.236	0.411823
							9.894	0.364166			6.633	0.244139			19.415	0.714604			3.558	0.130959			5.72	0.210535			3.551	0.130701						121.719	0.891364			48.264	0.353443			47.657	0.348998
							7.137	0.26269			2.849	0.104863			1.603	0.0590013			3.82	0.140602			2.531	0.093158			1.536	0.0565352						104.891	0.76813			73.833	0.540688			81.749	0.598658
							9.125	0.335862			7.911	0.291178			3.124	0.114984			1.569	0.0577498			1.526	0.0561672			1.459	0.0537011						130.124	0.952915			118.853	0.870376			51.57	0.377654
							12.875	0.473887			3.15	0.115941			3.083	0.113475			4.388	0.161508			2.73	0.100483			1.26	0.0463765						50.235	0.367877			116.515	0.853254			26.91	0.197065
							9.244	0.340242			13.582	0.49991			2.529	0.0930844			2.769	0.101918			2.811	0.103464			2.339	0.0860911						68.255	0.49984			74.389	0.54476			40.832	0.299018
							8.236	0.303141			16.456	0.605692			2.736	0.100703			2.305	0.0848396			1.498	0.0551366			2.106	0.0775151						151.435	1.10898			13.346	0.0977345			27.993	0.204996
							3.452	0.127057			7.726	0.284369			8.622	0.317348			1.955	0.0719573			1.728	0.0636021			2.654	0.0976852						91.542	0.670374			68.299	0.500162			25.538	0.187018
							10.617	0.390778			9.768	0.359529			2.809	0.10339			1.08	0.0397513			3.296	0.121315			1.32	0.048585						70.026	0.512809			82.866	0.606838			92.957	0.680736
							9.697	0.356915			8.187	0.301337			2.627	0.0966914			2.872	0.105709			2.231	0.0821159			3.4	0.125143						131.526	0.963182			16.136	0.118166			33.817	0.247646
							6.321	0.232656			12.488	0.459643			2.463	0.0906551			4.799	0.176636			2.095	0.0771102			3.555	0.130848						141.232	1.03426			12.197	0.0893202			11.736	0.0859442
							10.043	0.369651			9.277	0.341457			4.597	0.169201			3.235	0.11907			3.132	0.115279			0.828	0.030476						97.768	0.715968			91.977	0.673559			32.8	0.240199
							7.803	0.287203			9.01	0.331629			3.98	0.146491			3.108	0.114395			2.78	0.102323			4.176	0.153705						87.507	0.640825			23.149	0.169523			27.588	0.20203
							13.707	0.504511			5.756	0.21186			4.594	0.16909			1.641	0.0603999			3.322	0.122272			2.267	0.083441						113.437	0.830714			102.147	0.748036			69.145	0.506358
							10.206	0.37565			8.783	0.323274			1.962	0.0722149			1.144	0.042107			1.802	0.0663258			2.544	0.0936365						85.794	0.62828			22.88	0.167553			161.417	1.18208
							8.346	0.307189			5.91	0.217528			14.816	0.545329			2.911	0.107145			1.961	0.0721781			1.07	0.0393833						140.057	1.02566			26.897	0.19697			28.668	0.209939
							8.222	0.302625			3.555	0.130848			4.075	0.149988			1.311	0.0482537			2.777	0.102212			4.51	0.165999						150.43	1.10162			103.503	0.757966			170.848	1.25114
							8.476	0.311974			9.051	0.333138			2.995	0.110236			1.455	0.0535539			2.137	0.0786561			3.119	0.1148						72.428	0.530399			67.89	0.497167			30.063	0.220155
							9.908	0.364682			3.549	0.130627			4.277	0.157423			1.223	0.0450147			2.751	0.101255			2.871	0.105672						107.08	0.784161			60.493	0.442998			28.691	0.210108
							9.05	0.333101			17.249	0.63488			4.609	0.169642			0.989	0.0364019			2.246	0.082668			1.772	0.0652216						55.682	0.407766			63.198	0.462807			60.451	0.44269
							8.734	0.32147			4.62	0.170047			2.147	0.0790242			1.523	0.0560567			2.187	0.0804964			1.206	0.044389						92.03	0.673947			44.611	0.326692			117.778	0.862503
							12.832	0.472305			8.484	0.312269			3.978	0.146417			1.292	0.0475544			2.84	0.104531			1.699	0.0625347						19.532	0.143035			52.232	0.382502			102.935	0.753806
							6.08	0.223785			7.099	0.261291			11.017	0.4055			0.953	0.0350769			3.526	0.129781			3.146	0.115794						127.35	0.9326			58.946	0.431669			148.005	1.08386
							12.022	0.442491			12.779	0.470354			14.208	0.522951			1.357	0.0499468			3.568	0.131327			1.327	0.0488426						83.275	0.609833			57.263	0.419344			48.297	0.353685
							5.569	0.204977			7.25	0.266849			3.259	0.119953			1.723	0.0634181			3.179	0.117009			1.418	0.052192						95.909	0.702354			59.18	0.433383			89.177	0.653055
							10.029	0.369135			5.259	0.193567			3.443	0.126726			1.136	0.0418125			2.201	0.0810117			1.236	0.0454932						122.863	0.899741			44.891	0.328743			117.105	0.857575
							8.04	0.295927			11.267	0.414702			2.893	0.106482			2.194	0.0807541			2.559	0.0941886			1.008	0.0371012						146.793	1.07498			36.412	0.26665			113.832	0.833606
							9.16	0.33715			7.293	0.268432			4.639	0.170747			1.232	0.045346			2.682	0.0987158			1.576	0.0580075						140.931	1.03206			49.458	0.362187			115.605	0.84659
							4.695	0.172808			10.014	0.368583			10.653	0.392103			1.059	0.0389784			2.235	0.0822632			1.285	0.0472967						86.017	0.629913			85.973	0.629591			98.912	0.724345
							11.943	0.439583			6.494	0.239023			2.893	0.106482			2.029	0.074681			3.725	0.137105			0.939	0.0345616						125.674	0.920327			41.428	0.303383			137.475	1.00675
							13.086	0.481654			9.104	0.335089			14.526	0.534655			1.996	0.0734663			5.243	0.192978			1.401	0.0515663						144.552	1.05857			88.433	0.647606			20.825	0.152504
							9.332	0.343481			6.573	0.241931			3.489	0.128419			5.396	0.198609			3.602	0.132578			1.179	0.0433952						161.059	1.17946			41.696	0.305345			65.275	0.478017
							13.396	0.493064			2.185	0.0804228			2.255	0.0829993			6.898	0.253893			3.308	0.121757			2.276	0.0837722						72.065	0.527741			46.877	0.343286			28.078	0.205619
							17.903	0.658952			8.72	0.320955			2.84	0.104531			12.206	0.449264			2.739	0.100814			1.263	0.046487						155.938	1.14195			48.672	0.356431			119.437	0.874652
							13.341	0.491039			5.324	0.195959			2.989	0.110015			10.882	0.400531			4.301	0.158306			2.33	0.0857598						89.579	0.655998			72.283	0.529338			26.813	0.196355
							11.404	0.419745			1.637	0.0602527			11.948	0.439767			8.364	0.307852			3.827	0.14086			2.12	0.0780304						152.244	1.1149			51.178	0.374783			30.272	0.221686
							11.401	0.419634			8.735	0.321507			24.796	0.912661			3.24	0.119254			3.415	0.125695			1.947	0.0716628						109.614	0.802717			47.501	0.347856			39.781	0.291321
							11.672	0.429609			7.699	0.283375			12.525	0.461005			8.098	0.298061			3.758	0.13832			1.131	0.0416285						138.799	1.01644			47.981	0.351371			73.9	0.541179
							9.777	0.35986			4.179	0.153816			4.665	0.171704			12.177	0.448196			3.208	0.118076			5.237	0.192757						163.491	1.19727			56.765	0.415697			9.785	0.0716568
							13.439	0.494646			3.966	0.145976			4.424	0.162833			6.728	0.247636			1.28	0.0471127			6.284	0.231294						79.112	0.579347			43.234	0.316608			72.89	0.533783
							15.123	0.556629			7.208	0.265303			6.848	0.252053			2.604	0.0958449			3.408	0.125438			11.743	0.432222						169.724	1.24291			43.257	0.316777			64.7	0.473806
							11.709	0.430971			6.558	0.241379			4.582	0.168649			6.922	0.254777			3.603	0.132615			10.53	0.387575						107.298	0.785757			95.615	0.700201			60.152	0.440501
							13.944	0.513234			8.398	0.309103			4.671	0.171924			9.083	0.334316			4.779	0.1759			8.013	0.294933						48.827	0.357566			86.67	0.634695			40.36	0.295561
							5.625	0.207038			25.795	0.949431			37.036	1.36318			7.242	0.266555			3.408	0.125438			3.391	0.124812						103.588	0.758588			71.975	0.527082			73.406	0.537562
							15.737	0.579228			35.45	1.3048			13.357	0.491628			8.6	0.316538			1.361	0.050094			5.864	0.215835						99.631	0.729611			114.679	0.839809			45.345	0.332067
							12.037	0.443043			33.114	1.21882			22.412	0.824914			8.723	0.321066			4.009	0.147558			8.418	0.30984						100.284	0.734393			55.377	0.405533			39.301	0.287806
							11.709	0.430971			8.33	0.306601			2.253	0.0829257			2.271	0.0835882			2.212	0.0814166			7.339	0.270125						98.295	0.719827			56.743	0.415536			24.575	0.179966
							10.255	0.377454			8.483	0.312232			2.991	0.110089			4.753	0.174943			4.648	0.171078			6.29	0.231515						124.421	0.911151			63.075	0.461906			59.938	0.438934
							8.987	0.330783			11.084	0.407966			15.954	0.587215			12.179	0.44827			3.938	0.144945			2.54	0.0934892						85.212	0.624018			68.269	0.499943			30.863	0.226014
							8.547	0.314588			9.021	0.332034			4.664	0.171667			2.294	0.0844348			2.918	0.107402			8.337	0.306858						77.367	0.566568			47.616	0.348698			29.422	0.215461
							8.33	0.306601			7.866	0.289522			13.969	0.514154			3.926	0.144503			3.461	0.127388			8.412	0.309619						69.904	0.511916			35.123	0.25721			33.562	0.245779
							11.006	0.405095			5.896	0.217013			5.881	0.216461			8.174	0.300859			3.528	0.129854			2.189	0.0805701						170.938	1.2518			75.162	0.550421			112.121	0.821076
							6.49	0.238876			8.501	0.312894			3.961	0.145792			12.385	0.455852			3.215	0.118334			5.086	0.187199						188.643	1.38146			80.125	0.586766			43.007	0.314946
							11.215	0.412788			11.932	0.439179			4.241	0.156098			4.882	0.179691			3.762	0.138467			11.657	0.429057						166.011	1.21572			102.238	0.748702			78.844	0.577385
							14.172	0.521626			11.248	0.414003			4.158	0.153043			4.939	0.181789			3.874	0.142589			2.246	0.082668						126.23	0.924398			48.295	0.35367			44.632	0.326846
							11.456	0.421659			7.426	0.273327			3.53	0.129928			8.122	0.298945			3.07	0.112997			3.448	0.12691						146.559	1.07327			82.383	0.603301			76.704	0.561713
							6.574	0.241968			9.011	0.331666			4.245	0.156245			13.442	0.494757			3.447	0.126873			7.863	0.289412						133.945	0.980896			45.252	0.331386			39.178	0.286906
							5.574	0.205161			9.761	0.359271			4.165	0.1533			4.383	0.161324			2.647	0.0974276			8.64	0.318011						112.104	0.820952			49.318	0.361162			37.221	0.272574
							13.382	0.492548			29.079	1.0703			2.431	0.0894773			8.093	0.297877			3.603	0.132615			4.137	0.15227						172.838	1.26571			30.621	0.224241			58.45	0.428037
							11.922	0.43881			14.876	0.547538			5.534	0.203689			4.1	0.150908			2.7	0.0993783			7.796	0.286946						175.024	1.28172			51.933	0.380312			42.661	0.312412
							15.558	0.57264			9.785	0.360154			2.672	0.0983477			8.952	0.329494			3.434	0.126395			4.696	0.172845						71.232	0.521641			86.822	0.635809			46.69	0.341917
							15.542	0.572051			10.584	0.389563			2.568	0.0945198			11.202	0.41231			2.904	0.106887			7.145	0.262984						109.45	0.801516			117.082	0.857406			46.995	0.34415
							23.569	0.867499			10.573	0.389158			6.697	0.246495			7.284	0.268101			5.156	0.189776			12.574	0.462809						94.777	0.694064			98.795	0.723488			66.03	0.483546
							30.103	1.10799			8.699	0.320182			2.413	0.0888148			11.422	0.420407			3.452	0.127057			3.79	0.139498						137.978	1.01043			45.911	0.336212			62.946	0.460962
							14.303	0.526447			9.74	0.358498			4.405	0.162134			6.254	0.23019			3.903	0.143657			8.594	0.316318						131.503	0.963013			62.313	0.456326			49.085	0.359456
							12.803	0.471237			13.519	0.497591			5.382	0.198094			9.682	0.356363			3.491	0.128492			11.136	0.40988						152.496	1.11675			54.883	0.401915			101.799	0.745487
							47.204	1.73743			27.473	1.01119			2.976	0.109537			2.336	0.0859807			1.184	0.0435792			6.72	0.247342						71.703	0.52509			99.392	0.72786			43.981	0.322078
							13.049	0.480292			9.034	0.332513			3.189	0.117377			7.232	0.266187			3.271	0.120395			12.78	0.470391						163.24	1.19543			64.908	0.47533			55.4	0.405701
							12.435	0.457692			1.953	0.0718837			3.066	0.11285			8.532	0.314035			2.402	0.0884099			7.237	0.266371						156.229	1.14408			54.227	0.397111			38.273	0.280278
							15.364	0.565499			7.246	0.266702			2.894	0.106519			8.296	0.305349			1.917	0.0705586			2.136	0.0786193						5.172	0.0378752			51.975	0.38062			41.075	0.300797
							16.18	0.595534			3.647	0.134234			6.292	0.231588			11.819	0.435019			2.657	0.0977956			6.685	0.246053						96.458	0.706374			48.082	0.352111			100.898	0.738889
							16.942	0.623581			4.316	0.158858			3.288	0.121021			13.542	0.498437			3.177	0.116935			8.192	0.301521						144.134	1.05551			43.392	0.317765			52.806	0.386705
							11.455	0.421622			2.149	0.0790978			5.17	0.190291			6.001	0.220878			3.955	0.145571			8.328	0.306527						163.657	1.19848			31.572	0.231206			48.287	0.353612
							15.166	0.558212			25.447	0.936622			3.239	0.119217			12.544	0.461704			4.645	0.170968			7.816	0.287682						4.015	0.0294024			104.671	0.766519			26.549	0.194422
							3.897	0.143436			7.663	0.28205			4.445	0.163606			6.636	0.24425			3.373	0.124149			11.523	0.424125						132.577	0.970878			46.64	0.341551			49.937	0.365695
							7.695	0.283228			4.084	0.150319			3.452	0.127057			9.615	0.353897			3.109	0.114432			9.312	0.342745						146.429	1.07232			74.498	0.545558			138.57	1.01477
							5.069	0.186574			8.309	0.305828			1.957	0.0720309			2.758	0.101513			3.876	0.142663			13.547	0.498622						18.55	0.135844			99.269	0.72696			36.967	0.270714
							11.159	0.410727			9.046	0.332954			11.21	0.412604			8.997	0.331151			3.325	0.122383			3.424	0.126026						105.939	0.775805			41.204	0.301742			43.115	0.315737
							7.908	0.291068			10.874	0.400237			4.18	0.153852			3.667	0.13497			3.98	0.146491			5.841	0.214988						15.32	0.11219			118.45	0.867424			48.009	0.351576
							18.795	0.691784			10.293	0.378852			1.895	0.0697489			12.066	0.444111			3.303	0.121573			2.249	0.0827785						137.243	1.00505			76.967	0.563639			21.873	0.160179
							11.792	0.434026			8.254	0.303803			3.606	0.132725			3.746	0.137878			2.703	0.0994887			12.249	0.450846						116.063	0.849944			41.786	0.306004			63.791	0.46715
							14.471	0.532631			11.832	0.435498			4.467	0.164416			9.125	0.335862			3.711	0.13659			9.365	0.344696						107.737	0.788972			41.318	0.302577			48.995	0.358797
							5.83	0.214584			11.524	0.424161			4.343	0.159852			11.633	0.428173			3.743	0.137768			3.615	0.133057						72.216	0.528847			57.814	0.423379			51.953	0.380458
							11.193	0.411978			9.669	0.355885			4.108	0.151202			8.163	0.300454			4.143	0.152491			7.871	0.289706						150.585	1.10275			76.464	0.559956			53.273	0.390125
							13.973	0.514301			5.507	0.202695			4.17	0.153484			8.806	0.324121			2.934	0.107991			9.33	0.343407						172.276	1.2616			11.972	0.0876725			56.972	0.417213
							10.459	0.384962			11.191	0.411905			5.031	0.185175			8.874	0.326623			4.12	0.151644			10.215	0.375981						104.98	0.768782			68.178	0.499276			65.991	0.483261
							8.526	0.313815			6.053	0.222791			4.688	0.17255			15.555	0.57253			4.223	0.155435			8.96	0.329789						164.262	1.20291			91.44	0.669627			49.091	0.3595
							10.6	0.390152			5.334	0.196327			16.815	0.618906			3.822	0.140676			3.371	0.124076			3.637	0.133866						111.301	0.815071			72.132	0.528232			8.54	0.0625395
							15.842	0.583093			4.665	0.171704			5.462	0.201039			12.183	0.448417			6.009	0.221172			7.886	0.290258						161.417	1.18208			71.182	0.521275			167.518	1.22676
							16.759	0.616845			15.384	0.566236			5.933	0.218375			9.268	0.341125			3.258	0.119917			8.223	0.302662						125.065	0.915867			113.056	0.827924			167.299	1.22515
							11.989	0.441277			14.784	0.544152			5.866	0.215909			14.002	0.515369			3.352	0.123376			8.896	0.327433						145.989	1.0691			88.026	0.644626			151.86	1.11209
							13.573	0.499579			8.808	0.324194			4.163	0.153227			11.514	0.423793			3.606	0.132725			4.247	0.156318						169.999	1.24492			67.799	0.496501			145.111	1.06267
							15.322	0.563954			13.428	0.494242			8.711	0.320624			11.929	0.439068			13.944	0.513234			14.904	0.548568						136.207	0.997461			83.437	0.61102			124.203	0.909554
							10.401	0.382827			13.853	0.509884			11.067	0.407341			10.697	0.393722			15.124	0.556666			11.78	0.433584						99.118	0.725854			22.416	0.164155			150.823	1.1045
							20.22	0.744233			10.479	0.385698			11.393	0.41934			1.401	0.0515663			2.891	0.106408			13.623	0.501419						107.082	0.784175			61.073	0.447245			132.799	0.972504
							12.665	0.466158			18.64	0.686078			6.054	0.222828			10.609	0.390483			2.986	0.109905			11.555	0.425302						150.995	1.10576			42.202	0.309051			143.776	1.05289
							15.91	0.585596			8.697	0.320109			17.935	0.66013			4.482	0.164968			7.04	0.25912			1.321	0.0486218						150.549	1.10249			48.692	0.356578			19.761	0.144712
							17.184	0.632488			10.421	0.383564			4.074	0.149951			10.193	0.375172			2.526	0.0929739			10.138	0.373147						108.798	0.796742			24.865	0.18209			164.602	1.2054
							1.777	0.0654057			13.316	0.490119			17.852	0.657075			6.104	0.224669			1.755	0.0645959			3.997	0.147117						169.633	1.24224			109.36	0.800857			92.033	0.673969
							4.159	0.153079			9.843	0.362289			17.847	0.656891			15.637	0.575548			2.96	0.108948			2.711	0.0997832						162.017	1.18647			84.323	0.617508			82.1	0.601229
							23.828	0.877032			5.667	0.208584			18.955	0.697673			6.924	0.25485			3.626	0.133461			9.054	0.333249						120.529	0.882649			77.944	0.570794			12.695	0.0929671
							18.735	0.689575			9.378	0.345174			4.22	0.155325			6.505	0.239428			11.999	0.441645			9.069	0.333801						177.128	1.29713			20.295	0.148623			11.894	0.0871013
							17.848	0.656928			7.88	0.290037			7.725	0.284332			7.916	0.291363			2.488	0.0915753			11.697	0.430529						38.969	0.285375			16.473	0.120634			25.485	0.18663
							17.451	0.642315			10.009	0.368399			4.382	0.161287			10.36	0.381318			3.811	0.140271			2.071	0.0762269						36.783	0.269367			69.403	0.508247			5.757	0.0421592
							1.709	0.0629028			6.036	0.222166			2.245	0.0826312			8.027	0.295448			3.085	0.113549			6.806	0.250507						45.302	0.331752			126.859	0.929005			40.849	0.299142
							2.063	0.0759324			17.333	0.637972			4.926	0.18131			12.872	0.473777			2.829	0.104126			14.488	0.533257						4.227	0.0309549			103.306	0.756523			26.109	0.1912
							1.817	0.0668779			7.677	0.282566			9.85	0.362547			11.245	0.413892			1.766	0.0650008			5.888	0.216718						5.591	0.0409436			64.263	0.470606			44.945	0.329138
							2.228	0.0820055			23.82	0.876738			7.249	0.266812			3.652	0.134418			3.047	0.11215			9.967	0.366853						6.902	0.0505442			81.466	0.596586			36.313	0.265925
							8.204	0.301963			23.397	0.861168			8.472	0.311827			3.296	0.121315			3.887	0.143068			7.657	0.28183										62.038	0.454312			24.408	0.178743
							2.616	0.0962866			1.637	0.0602527			9.65	0.355185			4.121	0.151681			3.343	0.123045			6.419	0.236263										15.735	0.115229			41.519	0.304049
							21.445	0.789322			18.214	0.670399			4.631	0.170452			8.507	0.313115			8.304	0.305644			7.346	0.270383										101.616	0.744147			16.092	0.117844
							3.375	0.124223			8.235	0.303104			3.732	0.137363			8.654	0.318526			3.402	0.125217			13.094	0.481948										93.665	0.685921			23.972	0.17555
							11.288	0.415475			21.197	0.780193			9.023	0.332108			15.322	0.563954			1.837	0.0676141			10.847	0.399243										111.097	0.813578			84.499	0.618797
							14.22	0.523392			27.608	1.01616			9.095	0.334758			16.312	0.600392			1.458	0.0536643			3.475	0.127904										117.161	0.857985			9.717	0.0711588
							11.913	0.438479			11.08	0.407819			8.044	0.296074			3.561	0.131069			2.064	0.0759692			3.072	0.11307										73.036	0.534852			21.293	0.155931
							9.41	0.346352			24.842	0.914354			7.691	0.283081			6.77	0.249182			7.555	0.278075			14.197	0.522546										41.009	0.300314			55.814	0.408733
							6.897	0.253856			19.167	0.705476			7.429	0.273438			1.856	0.0683134			4.748	0.174759			3.44	0.126615										109.845	0.804409			37.939	0.277832
							7.578	0.278922			5.965	0.219552			9.458	0.348119			2.077	0.0764477			3.112	0.114543			7.895	0.29059										107.471	0.787024			8.469	0.0620196
							4.609	0.169642			1.69	0.0622035			7.758	0.285547			6.144	0.226141			7.419	0.27307			7.561	0.278296										81.587	0.597472			56.289	0.412212
							2.157	0.0793922			21.084	0.776034			6.625	0.243845			2.399	0.0882995			1.467	0.0539956			15.1	0.555782										48.274	0.353517			35.286	0.258404
							7.87	0.289669			3.371	0.124076			15.26	0.561672			2.791	0.102728			5.101	0.187751			15.87	0.584124										65.393	0.478881			8.443	0.0618292
							10.355	0.381134			19.362	0.712653			7.564	0.278407			5.657	0.208216			1.649	0.0606944			3.418	0.125806										61.79	0.452496			34.579	0.253226
							6.592	0.24263			9.691	0.356695			7.086	0.260813			2.236	0.0823			3.717	0.136811			6.34	0.233355										112.865	0.826525			45.735	0.334923
							4.64	0.170783			26.473	0.974386			7.97	0.29335			7.445	0.274027			3.988	0.146785			1.717	0.0631973										78.16	0.572376			72.796	0.533094
							3.511	0.129229			11.086	0.40804			6.948	0.255734			2.812	0.103501			2.542	0.0935628			1.976	0.0727302										56.164	0.411296			5.755	0.0421446
							5.844	0.215099			3.369	0.124002			7.016	0.258236			7.186	0.264494			6.601	0.242962			5.484	0.201848										45.978	0.336703			99.543	0.728966
							9.334	0.343555			22.285	0.820239			9.237	0.339984			2.588	0.095256			5.779	0.212706			2.298	0.084582										48.811	0.357449			102.073	0.747494
							10.362	0.381392			8.593	0.316281			8.141	0.299644			2.057	0.0757116			3.523	0.12967			2.65	0.097538										55.251	0.40461			39.003	0.285624
							2.469	0.090876			20.24	0.744969			6.753	0.248556			7.775	0.286173			7.782	0.28643			5.045	0.18569										32.863	0.24066			41.266	0.302196
							2.835	0.104347			3.655	0.134529			9.305	0.342487			8.53	0.313962			7.149	0.263132			2.112	0.0777359										56.232	0.411794			39.861	0.291907
							13.529	0.497959			19.753	0.727044			6.762	0.248887			10.267	0.377895			2.957	0.108838			7.261	0.267254										35.765	0.261912			67.935	0.497497
							2.561	0.0942622			3.956	0.145608			7.587	0.279253			2.224	0.0818583			3.552	0.130738			6.597	0.242814										90.225	0.660729			63.531	0.465246
							2.858	0.105194			3.668	0.135007			5.931	0.218301			2.985	0.109868			1.944	0.0715524			1.981	0.0729142										39.973	0.292727			66.249	0.48515
							3.12	0.114837			7.057	0.259745			7.398	0.272297			3.034	0.111672			3.777	0.139019			2.909	0.107071										41.293	0.302394			62.696	0.459131
							9.695	0.356842			7.955	0.292798			5.993	0.220583			1.697	0.0624611			3.832	0.141044			7.331	0.269831										52.017	0.380927			41.881	0.3067
							12.022	0.442491			7.275	0.267769			9.771	0.359639			2.072	0.0762637			6.494	0.239023			2.077	0.0764477										84.244	0.61693			39.844	0.291783
							13.399	0.493174			4.994	0.183813			5.833	0.214694			2.608	0.0959921			2.169	0.0798339			8.053	0.296405										52.709	0.385995			35.889	0.26282
							3.542	0.13037			1.88	0.0691968			7.8	0.287093			1.766	0.0650008			2.358	0.0867904			10.013	0.368546										42.374	0.31031			42.36	0.310208
							2.828	0.10409			21.67	0.797603			7.085	0.260776			2.897	0.106629			2.701	0.0994151			2.141	0.0788033										49.855	0.365095			34.869	0.25535
							3.156	0.116162			17.929	0.659909			6.976	0.256764			3.287	0.120984			6.066	0.22327			2.865	0.105451										48.005	0.351547			43.839	0.321039
							15.94	0.5867			14.417	0.530643			6.915	0.254519			2.589	0.0952928			13.403	0.493321			3.09	0.113733										81.495	0.596798			26.59	0.194722
							9.271	0.341236			30.853	1.1356			6.678	0.245796			2.404	0.0884835			9.431	0.347125			1.594	0.05867										40.396	0.295825			42.468	0.310999
							13.922	0.512424			1.895	0.0697489			7.03	0.258752			2.799	0.103022			3.524	0.129707			1.875	0.0690127										89.211	0.653304			33.627	0.246255
							2.49	0.0916489			18.306	0.673785			9.606	0.353566			3.15	0.115941			13.49	0.496524			2.522	0.0928267										38.049	0.278638			43.26	0.316799
							2.305	0.0848396			37.803	1.39141			6.986	0.257132			2.24	0.0824472			7.682	0.28275			1.679	0.0617986										79.842	0.584693			40.064	0.293394
							1.439	0.052965			30.724	1.13085			5.549	0.204241			2.382	0.0876738			4.538	0.167029			2.843	0.104642										60.905	0.446015			29.106	0.213147
							14.54	0.535171			6.989	0.257243			5.534	0.203689			1.998	0.07354			2.366	0.0870849			2.799	0.103022										55.161	0.403951			35.058	0.256734
							8.361	0.307742			1.981	0.0729142			7.488	0.275609			2.716	0.0999672			3.886	0.143031			3.158	0.116236										99.163	0.726183			36.907	0.270275
							9.185	0.33807			2.116	0.0778832			6.302	0.231956			2.814	0.103574			1.898	0.0698593			2.459	0.0905079										72.197	0.528708			44.913	0.328904
							2.738	0.100777			35.763	1.31632			5.777	0.212633			3.003	0.110531			7.725	0.284332			2.351	0.0865328										58.395	0.427634			30.78	0.225406
							8.839	0.325335			26.932	0.99128			7.253	0.26696			2.788	0.102617			11.781	0.433621			2.678	0.0985686										54.607	0.399894			43.539	0.318842
							4.162	0.15319			17.565	0.646511			6.705	0.246789			2.535	0.0933052			2.088	0.0768526			3.015	0.110972										37.65	0.275716			33.021	0.241817
							1.318	0.0485113			17.577	0.646953			6.21	0.22857			3.335	0.122751			2.122	0.078104			2.191	0.0806437										74.206	0.54342			25.534	0.186989
							2.557	0.094115			14.289	0.525932			7.001	0.257684			2.364	0.0870112			1.468	0.0540324			2.347	0.0863855										107.105	0.784344			45.577	0.333766
							1.952	0.0718468			31.538	1.16081			9.566	0.352094			2.594	0.0954768			2.173	0.0799811			1.943	0.0715156										74.739	0.547323			40.751	0.298425
							1.89	0.0695648			24.053	0.885314			5.52	0.203173			2.523	0.0928635			3.118	0.114764			2.676	0.098495										90.056	0.659492			46.598	0.341243
							6.855	0.252311			4.163	0.153227			5.752	0.211713			1.27	0.0467446			3.248	0.119548			2.545	0.0936733										75.23	0.550919			12.759	0.0934358
							6.565	0.241637			7.847	0.288823			5.987	0.220362			5.503	0.202548			2.682	0.0987158			2.735	0.100667										43.41	0.317897			30.666	0.224571
							5.717	0.210424			4.692	0.172697			5.453	0.200707			2.975	0.1095			1.695	0.0623875			3.241	0.119291										37.729	0.276294			44.617	0.326736
							1.58	0.0581547			4.04	0.148699			5.704	0.209946			2.578	0.0948879			2.508	0.0923114			2.3	0.0846556										143.659	1.05203			39.5	0.289264
							12.156	0.447423			13.74	0.505725			5.905	0.217344			2.17	0.0798707			2.217	0.0816006			2.452	0.0902502										46.516	0.340643			51.38	0.376262
							1.75	0.0644119			3.764	0.138541			9.373	0.34499			2.124	0.0781776			2.418	0.0889988			2.391	0.088005										47.288	0.346296			40.773	0.298586
							11.186	0.411721			5.003	0.184144			8.866	0.326329			5.467	0.201223			2.504	0.0921642			1.19	0.0438001										144.564	1.05866			36.291	0.265764
							7.427	0.273364			4.705	0.173176			5.886	0.216645			3.01	0.110788			2.638	0.0970963			5.121	0.188488										102.898	0.753535			36.85	0.269857
							3.878	0.142737			12.274	0.451766			8.494	0.312637			2.394	0.0881154			3.25	0.119622			3.644	0.134124										74.76	0.547477			37.007	0.271007
							5.088	0.187273			4.6	0.169311			7.287	0.268211			2.126	0.0782512			2.77	0.101955			2.863	0.105378										41.142	0.301288			42.282	0.309636
							11.976	0.440798			21.311	0.784389			6.808	0.250581			2.739	0.100814			8.492	0.312563			2.467	0.0908023										62.256	0.455909			46.949	0.343814
							8.412	0.309619			5.34	0.196548			9.977	0.367221			2.45	0.0901766			3.437	0.126505			2.095	0.0771102										55.039	0.403058			36.639	0.268312
							1.435	0.0528177			6.967	0.256433			13.478	0.496082			2.664	0.0980533			3.648	0.134271			2.049	0.0754171										87.718	0.64237			32.874	0.240741
							1.843	0.0678349			17.52	0.644855			6.945	0.255623			2.826	0.104016			2.244	0.0825944			2.24	0.0824472										43.861	0.3212			32.674	0.239276
							2.475	0.0910968			4.923	0.1812			6.873	0.252973			2.651	0.0975748			2.82	0.103795			2.95	0.10858										53.15	0.389224			49.488	0.362407
							13.221	0.486623			6.222	0.229012			6.657	0.245023			2.822	0.103869			1.905	0.0701169			5.934	0.218411										48.063	0.351971			38.314	0.280578
							4.247	0.156318			11.075	0.407635			6.701	0.246642			2.943	0.108322			2.676	0.098495			2.049	0.0754171										54.854	0.401703			46.011	0.336944
							5.488	0.201996			13.486	0.496376			7.645	0.281388			2.428	0.0893669			2.265	0.0833674			2.681	0.098679										83.32	0.610163			45.684	0.33455
							6.908	0.254261			11.176	0.411353			8.1	0.298135			2.287	0.0841771			1.571	0.0578235			2.372	0.0873057										40.437	0.296125			57.936	0.424273
							8.965	0.329973			4.656	0.171372			6.828	0.251317			2.347	0.0863855			2.918	0.107402			2.589	0.0952928										33.935	0.24851			49.186	0.360195
							7.519	0.27675			5.046	0.185727			12.334	0.453975			3.122	0.114911			2.847	0.104789			2.758	0.101513										88.096	0.645138			13.333	0.0976393
							4.698	0.172918			4.723	0.173838			10.629	0.391219			1.69	0.0622035			2.7	0.0993783			2.528	0.0930476										93.983	0.68825			11.494	0.084172
							4.058	0.149362			4.704	0.173139			7.577	0.278885			2.403	0.0884467			3.167	0.116567			2.761	0.101624										79.437	0.581727			54.67	0.400355
							4.929	0.181421			12.475	0.459165			6.879	0.253194			2.313	0.0851341			2.776	0.102176			2.836	0.104384										122.281	0.895479			57.213	0.418978
							10.222	0.376239			4.729	0.174059			6.729	0.247673			2.894	0.106519			2.018	0.0742761			2.354	0.0866432										71.903	0.526555			55.265	0.404713
							8.193	0.301558			5.94	0.218632			10.728	0.394863			2.583	0.0950719			1.086	0.0399722			2.2	0.0809749										64.79	0.474465			49.165	0.360042
							1.623	0.0597374			22.451	0.826349			6.596	0.242778			2.599	0.0956608			3.097	0.113991			1.978	0.0728038										82.215	0.602071			46.643	0.341573
							1.572	0.0578603			15.301	0.563181			6.464	0.237919			2.552	0.0939309			2.988	0.109979			3.041	0.111929										75.166	0.55045			22.362	0.16376
							11.969	0.44054			17.452	0.642352			6.416	0.236152			3.605	0.132688			2.901	0.106776			2.319	0.0853549										39.459	0.288963			34.235	0.250707
							7.596	0.279584			5.468	0.20126			7.53	0.277155			2.443	0.089919			1.508	0.0555046			2.696	0.0992311										36.363	0.266291			38.114	0.279114
							10.488	0.38603			4.681	0.172293			6.265	0.230595			3.174	0.116825			4.429	0.163017			2.511	0.0924218										40.562	0.297041			53.024	0.388302
							6.807	0.250544			6.706	0.246826			7.725	0.284332			2.942	0.108286			3.307	0.12172			2.374	0.0873793										59.197	0.433507			44.888	0.328721
							7.724	0.284296			17.004	0.625863			8.026	0.295411			2.821	0.103832			13.954	0.513602			2.475	0.0910968										50.224	0.367797			31.171	0.228269
							7.393	0.272113			4.304	0.158416			11.23	0.41334			1.612	0.0593325			4.819	0.177372			3.413	0.125622										61.036	0.446974			36.077	0.264196
							1.514	0.0557255			17.796	0.655014			11.351	0.417794			0.781	0.0287461			4.434	0.163201			2.257	0.0830729										53.35	0.390689			54.803	0.401329
							6.468	0.238066			4.483	0.165005			7.621	0.280505			0.443	0.0163054			2.629	0.096765			3.09	0.113733										72.337	0.529733			48.031	0.351737
							1.839	0.0676877			6.183	0.227576			7.901	0.29081			0.83	0.0305496			2.39	0.0879682			2.678	0.0985686										45.826	0.33559			48.803	0.357391
							12.393	0.456146			4.593	0.169054			11.127	0.409549			2.013	0.0740921			2.958	0.108874			2.688	0.0989366										105.964	0.775988			47.359	0.346816
							1.605	0.0590749			6.353	0.233834			7.718	0.284075			1.499	0.0551734			1.503	0.0553206			2.878	0.10593										83.803	0.6137			36.737	0.26903
							1.9	0.0699329			5.019	0.184733			7.491	0.27572			0.849	0.031249			9.272	0.341273			2.397	0.0882259										89.38	0.654541
							9.338	0.343702			5.865	0.215872			10.666	0.392581			1.212	0.0446098			15.615	0.574738			1.503	0.0553206										55.489	0.406353
							7.197	0.264898			5.994	0.22062			7.526	0.277008			1.267	0.0466342			9.294	0.342082			0.775	0.0285253										86.559	0.633883
							10.451	0.384668			4.966	0.182782							1.06	0.0390152			2.822	0.103869			0.415	0.0152748										38.394	0.281164
							11.875	0.437081			5.675	0.208879							0.715	0.0263169			4.117	0.151534			1.987	0.0731351										94.476	0.69186
							12.173	0.448049			3.258	0.119917							1.354	0.0498364			2.083	0.0766685			0.842	0.0309913										46.438	0.340071
							10.476	0.385588			5.594	0.205897							0.556	0.0204646			2.701	0.0994151			0.719	0.0264641										53.91	0.39479
							10.918	0.401856			5.803	0.21359							1.585	0.0583388			1.605	0.0590749			1.351	0.049726										35.968	0.263398
							14.758	0.543195			5.573	0.205124							1.426	0.0524865			3.392	0.124849			1.786	0.0657369										44.128	0.323155
							11.876	0.437117			5.946	0.218853							1.274	0.0468918			3.24	0.119254			1.325	0.048769										22.44	0.164331
							19.898	0.732381			10.21	0.375797							1.023	0.0376533			1.862	0.0685342			0.789	0.0290406										125.224	0.917031
							19.364	0.712727			5.34	0.196548							1.963	0.0722517			2.671	0.0983109			1.269	0.0467078										129.006	0.944727
							11.659	0.42913			5.487	0.201959							2.319	0.0853549			7.752	0.285326			1.195	0.0439841										131.205	0.960831
							15.651	0.576063			12.488	0.459643							1.201	0.0442049			8.98	0.330525			1.242	0.045714										127.515	0.933809
							17.202	0.63315			11.987	0.441203							1.091	0.0401562			1.948	0.0716996			0.687	0.0252863										85.787	0.628229
							17.124	0.630279			5.045	0.18569							1	0.0368068			3.097	0.113991			1.637	0.0602527										77.96	0.570911
							13.297	0.48942			18.167	0.668669							0.951	0.0350033			1.854	0.0682398			1.986	0.0730983										20.311	0.14874
							13.884	0.511025			11.614	0.427474							0.836	0.0307705			4.667	0.171777			1.439	0.052965										17.108	0.125284
							10.364	0.381466			23.506	0.86518							1.905	0.0701169			9	0.331261			0.555	0.0204278										115.797	0.847996
							12.782	0.470464			7.054	0.259635							0.812	0.0298871			4.731	0.174133			1.579	0.0581179										105.124	0.769836
							14.775	0.54382			6.715	0.247158							0.901	0.0331629			3.919	0.144246			1.345	0.0495051										54.223	0.397082
							12.535	0.461373			7.878	0.289964							1.315	0.0484009			11.972	0.440651			1.296	0.0477016										41.674	0.305184
							8.544	0.314477			4.524	0.166514							1.608	0.0591853			3.762	0.138467			1.028	0.0378374										51.074	0.374021
							13.922	0.512424			3.859	0.142037							0.813	0.0299239			3.134	0.115352			1.789	0.0658473										46.944	0.343777
							15.865	0.58394			9.766	0.359455							1.395	0.0513455			14.673	0.540066			2.185	0.0804228										54.901	0.402047
							1.219	0.0448675			5.922	0.21797							2.151	0.0791714			1.825	0.0671724			1.212	0.0446098										44.963	0.32927
							10.524	0.387355											2.58	0.0949615			2.44	0.0898086			1.088	0.0400458										10.854	0.0794852
							1.492	0.0549157											1.33	0.048953			3.667	0.13497			0.989	0.0364019										106.162	0.777438
							11.191	0.411905											2.106	0.0775151			3.919	0.144246			0.927	0.0341199										78.426	0.574324
							2.406	0.0885571											1.898	0.0698593			5.239	0.192831			0.809	0.0297767										101.493	0.743246
							3.233	0.118996											1.541	0.0567193			1.606	0.0591117			1.823	0.0670988										36.775	0.269308
							1.885	0.0693808											2.515	0.0925691			3.337	0.122824			0.716	0.0263537										70.05	0.512985
							0.485	0.0178513											3.751	0.138062			1.06	0.0390152			0.796	0.0292982										93.382	0.683848
							2.042	0.0751595											1.894	0.0697121			1.787	0.0657737			0.828	0.030476										95.215	0.697272
							1.578	0.0580811											2.197	0.0808645			16.243	0.597853			1.27	0.0467446										72.672	0.532186
							1.949	0.0717364											1.041	0.0383159			7.301	0.268726			1.454	0.0535171										66.898	0.489903
							2.048	0.0753803											1.934	0.0711843			1.253	0.0461189			1.401	0.0515663										20.415	0.149502
							1.149	0.042291											1.012	0.0372485			1.023	0.0376533			1.961	0.0721781										35.729	0.261648
							12.288	0.452282											0.995	0.0366228			6.297	0.231772			0.809	0.0297767										68.452	0.501283
							17.164	0.631752											1.984	0.0730247			5.418	0.199419			2.304	0.0848028										108.254	0.792758
							17.02	0.626451											1.897	0.0698225			1.735	0.0638598			1.284	0.0472599										86.186	0.631151
							10.445	0.384447											2.594	0.0954768			8.505	0.313042			2.043	0.0751963										74.911	0.548583
							17.372	0.639407											1.93	0.0710371			2.703	0.0994887			1.767	0.0650376										53.414	0.391158
							13.163	0.484488											0.959	0.0352977			2.01	0.0739816			1.474	0.0542532										29.484	0.215915
							14.947	0.550151											2.021	0.0743865			2.557	0.094115			2.541	0.093526										54.911	0.40212
							13.133	0.483384											1.229	0.0452355			4.183	0.153963			3.605	0.132688										50.567	0.370309
							16.071	0.591522											2.149	0.0790978			2.464	0.0906919			1.441	0.0530386										77.774	0.569549
							16.528	0.608343											0.992	0.0365123			3.842	0.141412			2.561	0.0942622										42.933	0.314404
							12.364	0.455079											1.156	0.0425486			3.908	0.143841			1.657	0.0609888										60.561	0.443496
							12.731	0.468587											4.902	0.180427			1.872	0.0689023			2.08	0.0765581										46.016	0.336981
							15.65	0.576026											1.075	0.0395673			3.587	0.132026			1.57	0.0577867										56.931	0.416913
							23.282	0.856936											2.04	0.0750858			2.443	0.089919			1.04	0.0382791										79.939	0.585404
							10.08	0.371012											1.764	0.0649272			2.33	0.0857598			0.986	0.0362915										61.558	0.450797
							17.317	0.637383											1.031	0.0379478			3.837	0.141228			0.97	0.0357026										42.39	0.310427
							7.89	0.290406											2.204	0.0811222			5.79	0.213111			1.831	0.0673932										72.207	0.528781
							7.563	0.27837											0.86	0.0316538			2.744	0.100998			2.376	0.0874529										66.537	0.487259
							11.052	0.406789											0.598	0.0220105			4.207	0.154846			1.585	0.0583388										50.293	0.368302
							13.291	0.489199											1.858	0.068387			3.218	0.118444			2.45	0.0901766										44.329	0.324627
							7.187	0.26453											0.542	0.0199493			4.841	0.178182			1.863	0.068571										18.418	0.134877
							13.017	0.479114											0.886	0.0326108			1.443	0.0531122			0.968	0.035629										41.481	0.303771
							6.426	0.23652											1.974	0.0726566			3.985	0.146675			1.196	0.0440209										52.954	0.387789
							18.384	0.676656											5.059	0.186206			4.025	0.148147			1.357	0.0499468										49.777	0.364523
							17.85	0.657001											1.911	0.0703378			2.097	0.0771838			1.831	0.0673932										54.427	0.398576
							6.446	0.237257											1.875	0.0690127			2.811	0.103464			0.991	0.0364755										74.968	0.549
							11.996	0.441534											2.45	0.0901766			1.82	0.0669883			1.972	0.072583										48.005	0.351547
							16.391	0.6033											2.655	0.097722			1.556	0.0572714			1.136	0.0418125										49.301	0.361038
							20.498	0.754465											2.25	0.0828153			2.181	0.0802756			4.303	0.15838										43.918	0.321617
							9.854	0.362694											2.035	0.0749018			2.004	0.0737608			0.836	0.0307705										51.118	0.374344
							10.678	0.393023											2.026	0.0745705			2.091	0.076963			1.953	0.0718837										45.381	0.332331
							10.145	0.373405											1.615	0.059443			1.488	0.0547685			1.012	0.0372485										53.762	0.393706
							14.258	0.524791											1.875	0.0690127			2.792	0.102765			1.707	0.0628292										53.706	0.393296
							15.493	0.570248											1.384	0.0509406			3.957	0.145644			2.035	0.0749018										55.25	0.404603
							21.899	0.806032											1.981	0.0729142			2.204	0.0811222			0.824	0.0303288										50.974	0.373289
							19.317	0.710997											1.625	0.059811			3.727	0.137179			1.536	0.0565352										40.236	0.294653
							18.747	0.690017											1.787	0.0657737			2.765	0.101771			1.78	0.0655161										120.725	0.884085
							12.117	0.445988											2.476	0.0911336			4.137	0.15227			0.895	0.0329421										76.252	0.558403
							16.816	0.618943											1.917	0.0705586			3.693	0.135927			0.763	0.0280836										48.907	0.358152
							20.334	0.748429											1.684	0.0619826			1.988	0.0731719			1.848	0.0680189										87.385	0.639932
							14.737	0.542422											1.366	0.0502781			1.236	0.0454932			2.902	0.106813										140.552	1.02928
							12.642	0.465311											1.932	0.0711107			2.77	0.101955			1.808	0.0665467										77.909	0.570538
							20.552	0.756453											1.336	0.0491739			3.802	0.139939			2.263	0.0832938										77.093	0.564562
							19.632	0.722591											2.5	0.092017			1.406	0.0517503			1.951	0.07181										45.487	0.333107
							16.003	0.589019											2.353	0.0866064			1.82	0.0669883			1.896	0.0697857										71.002	0.519957
							14.276	0.525454											1.544	0.0568297			1.184	0.0435792			1.688	0.0621299										76.274	0.558564
							12.137	0.446724											1.013	0.0372853			1.48	0.054474			1.552	0.0571241										118.245	0.865923
							19.58	0.720677											2.689	0.0989734			3.186	0.117266			1.391	0.0511982										49.717	0.364084
							13.892	0.51132											1.77	0.065148			3.541	0.130333			1.751	0.0644487										83.412	0.610837
							16.473	0.606318											1.71	0.0629396			2.307	0.0849133			1.879	0.06916										128.939	0.944237
							10.372	0.38176											3.567	0.13129			3.074	0.113144			1.559	0.0573818										42.003	0.307593
							23.201	0.853954											2.863	0.105378			3.184	0.117193			1.75	0.0644119										77.171	0.565133
							13.289	0.489125											1.873	0.0689391			2.455	0.0903607			2.407	0.0885939										79.618	0.583053
							15.52	0.571241											2.873	0.105746			3.119	0.1148			1.823	0.0670988										41.155	0.301383
							21.536	0.792671											2.375	0.0874161			1.695	0.0623875			1.672	0.0615409										57.144	0.418473
							17.221	0.63385											1.831	0.0673932			1.589	0.058486			1.497	0.0550998										42.528	0.311438
							16.644	0.612612											1.769	0.0651112			2.448	0.090103			1.372	0.0504989										51.889	0.37999
							12.088	0.44492											1.011	0.0372117			1.551	0.0570873			1.884	0.069344										65.933	0.482836
							14.801	0.544777											2.18	0.0802388			1.687	0.062093			1.532	0.056388										74.843	0.548085
							14.499	0.533662											0.935	0.0344143			2.666	0.0981269			1.378	0.0507198										80.449	0.589138
							20.278	0.746368											1.285	0.0472967			8.748	0.321986			2.365	0.087048										70.667	0.517503
							16.145	0.594246											2.466	0.0907655			2.532	0.0931948			2.295	0.0844716										64.651	0.473448
							11.624	0.427842											2.299	0.0846188			1.435	0.0528177			1.583	0.0582651										77.802	0.569754
							17.199	0.63304											2.742	0.100924			3.62	0.133241			1.201	0.0442049										122.099	0.894147
							7.045	0.259304											2.605	0.0958817			5.052	0.185948			0.975	0.0358866										99.54	0.728944
							4.417	0.162576											1.815	0.0668043			2.845	0.104715			2.841	0.104568										71.251	0.52178
							10.142	0.373294											3.222	0.118591			3.481	0.128124			1.686	0.0620562										62.197	0.455477
							14.415	0.53057											2.45	0.0901766			2.189	0.0805701			1.624	0.0597742										122.882	0.899881
							20.675	0.76098											2.592	0.0954032			2.551	0.0938941			4.093	0.15065										48.26	0.353414
							12.14	0.446834											2.489	0.0916121			1.221	0.0449411			2.808	0.103353										66.583	0.487596
							15.561	0.57275											3.485	0.128272			3.36	0.123671			2.656	0.0977588										67.361	0.493293
							13.354	0.491518											1.413	0.052008			3.038	0.111819			1.728	0.0636021										50.389	0.369005
							14.41	0.530386											3.784	0.139277			8.887	0.327102			2.763	0.101697										125.617	0.919909
							11.583	0.426333											2.25	0.0828153			2.481	0.0913176			2.185	0.0804228										32.724	0.239642
							19.688	0.724652											2.658	0.0978324			2.935	0.108028			2.027	0.0746074										116.474	0.852954
							22.8	0.839195											1.951	0.07181			2.176	0.0800916			1.65	0.0607312										109.967	0.805302
							6.352	0.233797											3.247	0.119512			1.289	0.0474439			0.89	0.032758										47.792	0.349987
							19.901	0.732492											2.375	0.0874161			1.139	0.0419229			2.155	0.0793186										87.1	0.637844
							6.54	0.240716											2.678	0.0985686			2.131	0.0784353			3.016	0.111009										65.946	0.482931
							17.214	0.633592											2.105	0.0774783			1.166	0.0429167			0.933	0.0343407										74.726	0.547228
							16.851	0.620231											1.736	0.0638966			1.173	0.0431744			1.222	0.0449779										100.387	0.735147
							15.492	0.570211											2.741	0.100887			8.725	0.321139			2.411	0.0887412										57.907	0.42406
							17.848	0.656928											2.356	0.0867168			2.495	0.0918329			2.2	0.0809749										65.018	0.476135
							14.478	0.532889											1.827	0.067246			2.334	0.085907			2.59	0.0953296										54.546	0.399447
							13.181	0.48515											3.193	0.117524			5.144	0.189334			2.473	0.0910232										59.299	0.434254
							13.517	0.497517											2.833	0.104274			14.126	0.519933			1.673	0.0615778										63.213	0.462917
							18.766	0.690716											3.187	0.117303			9.924	0.365271			3.135	0.115389										24.534	0.179666
							2.622	0.0965074											3.373	0.124149			4.023	0.148074			2.307	0.0849133										72.198	0.528715
							19.808	0.729069											2.93	0.107844			5.849	0.215283			2.335	0.0859438										49.511	0.362575
							20.184	0.742908											3.51	0.129192			10.529	0.387539			1.797	0.0661418										58.746	0.430204
							19.678	0.724284											1.655	0.0609152			9.83	0.361811			2.411	0.0887412										77.232	0.56558
							10.328	0.38014											10.658	0.392287			3.114	0.114616			3.457	0.127241										34.098	0.249704
							10.304	0.379257											2.582	0.0950351			7.961	0.293019			1.364	0.0502045										39.816	0.291578
							13.132	0.483347											1.662	0.0611729			3.255	0.119806			2.141	0.0788033										41.534	0.304159
							11.04	0.406347											3.01	0.110788			2.713	0.0998568			3.576	0.131621										65.492	0.479606
							16.307	0.600208											3.233	0.118996			2.061	0.0758588			2.555	0.0940413										51.296	0.375647
							23.553	0.86691											3.681	0.135486			6.849	0.25209			3.024	0.111304										117.872	0.863192
							21.183	0.779678											2.908	0.107034			2.173	0.0799811			1.882	0.0692704										69.214	0.506863
							13.635	0.501861											2.515	0.0925691			1.693	0.0623139			2.332	0.0858334										65.611	0.480478
							11.174	0.411279											2.965	0.109132			2.506	0.0922378			2.589	0.0952928										68.614	0.502469
							15.198	0.55939											2.721	0.100151			2.142	0.0788401			2.027	0.0746074										47.447	0.34746
							18.027	0.663516											1.978	0.0728038			2.321	0.0854285			1.661	0.0611361										47.935	0.351034
							1.278	0.0470391											4.493	0.165373			2.383	0.0877106			2.643	0.0972803										52.535	0.384721
							18.393	0.676987											2.373	0.0873425			2.57	0.0945934			1.829	0.0673196										34.579	0.253226
							18.262	0.672166											2.551	0.0938941			2.705	0.0995624			2.276	0.0837722										127.917	0.936753
							14.526	0.534655											2.491	0.0916857			1.147	0.0422174			3.089	0.113696										85.052	0.622847
							16.374	0.602674											2.776	0.102176			1.743	0.0641542			2.74	0.100851										66.749	0.488811
							22.922	0.843685											3.139	0.115536			3.602	0.132578			3.107	0.114359										33.82	0.247668
																			3.213	0.11826			2.336	0.0859807			3.256	0.119843										73.444	0.53784
																			3.518	0.129486			1.649	0.0606944			2.736	0.100703										86.354	0.632381
																			3.67	0.135081			2.969	0.109279			3.441	0.126652										31.297	0.229192
																			3.162	0.116383			2.345	0.0863119			1.702	0.0626451										104.139	0.762623
																			3.316	0.122051			1.463	0.0538483			10.451	0.384668										52.873	0.387196
																			2.923	0.107586			2.903	0.10685			2.473	0.0910232										45.153	0.330661
																			3.151	0.115978			2.615	0.0962497			1.673	0.0615778										35.587	0.260608
																			2.268	0.0834778			3.31	0.12183			2.882	0.106077										62.069	0.454539
																			2.818	0.103722			5.225	0.192315			3.144	0.115721										21.706	0.158956
																			2.628	0.0967282			2.148	0.079061			3.569	0.131363										56.931	0.416913
																			3.144	0.115721			2.308	0.0849501			2.841	0.104568										51.595	0.377837
																			2.89	0.106372			1.948	0.0716996			2.268	0.0834778										30.05	0.22006
																			2.309	0.0849869			9.135	0.33623			1.83	0.0673564										20.136	0.147459
																			4.492	0.165336			3.133	0.115316			2.655	0.097722										42.317	0.309893
																			1.468	0.0540324			4.752	0.174906			2.77	0.101955										50.867	0.372506
																			2.896	0.106592			2.227	0.0819687			4.147	0.152638										51.397	0.376387
																			4.639	0.170747			2.583	0.0950719			2.305	0.0848396										64.294	0.470833
																			3.091	0.11377			2.906	0.106961			2.404	0.0884835										101.442	0.742873
																			13.932	0.512792			3.068	0.112923			2.367	0.0871217										67.674	0.495585
																			3.065	0.112813			3.451	0.12702			2.721	0.100151										116.508	0.853203
																			3.144	0.115721			2.671	0.0983109			3.072	0.11307										14.92	0.109261
																			3.215	0.118334			2.452	0.0902502			3.138	0.1155										16.726	0.122487
																			3.647	0.134234			16.351	0.601828			3.391	0.124812										106.996	0.783545
																			3.118	0.114764			2.468	0.0908391			3.559	0.130995										111.491	0.816463
																			3.333	0.122677			2.921	0.107513			3.124	0.114984										33.011	0.241744
																			3.661	0.13475			2.977	0.109574			3.22	0.118518										111.938	0.819736
																			3.49	0.128456			2.699	0.0993415			2.96	0.108948										24.553	0.179805
																			3.999	0.14719			2.196	0.0808277			2.516	0.0926059										65.466	0.479416
																			11.051	0.406752			4.019	0.147926			2.701	0.0994151										96.714	0.708249
																			15.671	0.576799			2.586	0.0951823			2.556	0.0940781										66.365	0.485999
																			2.315	0.0852077			5.171	0.190328			2.851	0.104936										76.009	0.556624
																			4.951	0.18223			3.022	0.11123			2.225	0.0818951										78.018	0.571336
																			4.424	0.162833			2.286	0.0841403			3.308	0.121757										77.261	0.565792
																			2.074	0.0763373			2.961	0.108985			1.433	0.0527441										62.195	0.455462
																			3.275	0.120542			6.95	0.255807			2.81	0.103427										76.589	0.560871
																			2.378	0.0875265			3.476	0.12794			4.419	0.162649										90.353	0.661667
																			3.877	0.1427			2.135	0.0785825			2.814	0.103574										88.103	0.64519
																			21.764	0.801063			5.564	0.204793			4.438	0.163349										88.154	0.645563
																			2.817	0.103685			1.784	0.0656633			3.042	0.111966										68.932	0.504798
																			3.733	0.1374			2.747	0.101108			13.578	0.499763										50.485	0.369708
																			4.437	0.163312			2.631	0.0968387			3.024	0.111304										23.496	0.172064
																			3.151	0.115978							3.111	0.114506										71.728	0.525273
																			4.564	0.167986							3.105	0.114285										62.098	0.454752
																			13.137	0.483531							3.007	0.110678										111.722	0.818154
																			19.347	0.712101							3.516	0.129413										28.166	0.206263
																			9.948	0.366154							3.189	0.117377										79.945	0.585447
																			1.549	0.0570137							3.565	0.131216										63.544	0.465341
																			2.974	0.109463							3.331	0.122603										81.107	0.593957
																			2.135	0.0785825							3.863	0.142185										150.177	1.09977
																			3.288	0.121021							10.128	0.372779										63.862	0.46767
																			4.036	0.148552							15.185	0.558911										108.308	0.793153
																			4.102	0.150981							2.239	0.0824104										58.275	0.426755
																			3.539	0.130259							4.49	0.165262										63.503	0.465041
																			3.744	0.137805							4.224	0.155472										89.456	0.655098
																			3.358	0.123597							3.189	0.117377										98.88	0.724111
																			3.994	0.147006							2.359	0.0868272										80.369	0.588552
																			3.52	0.12956							2.097	0.0771838										67.31	0.49292
																			2.423	0.0891828							5.03	0.185138										134.608	0.985752
																			3.507	0.129081							21.216	0.780893										63.278	0.463393
																			5.051	0.185911							2.844	0.104678										109.362	0.800872
																			2.282	0.0839931							4.321	0.159042										111.283	0.81494
																			2.329	0.085723							3.035	0.111709										90.968	0.66617
																			1.68	0.0618354							4.419	0.162649										61.557	0.45079
																			10.396	0.382643							12.462	0.458686										78.273	0.573203
																			6.03	0.221945							18.23	0.670988										59.014	0.432167
																			3.304	0.12161							8.949	0.329384										77.292	0.566019
																			7.62	0.280468							9.785	0.360154										56.137	0.411098
																			10.349	0.380913							1.574	0.0579339										81.732	0.598534
																			8.139	0.29957							2.691	0.0990471										80.19	0.587242
																			8.593	0.316281							1.844	0.0678717										73.611	0.539063
																			2.486	0.0915017							3.207	0.118039										85.734	0.627841
																			9.601	0.353382							3.846	0.141559										114.061	0.835283
																			2.401	0.0883731							3.919	0.144246										69.405	0.508262
																			5.921	0.217933							3.416	0.125732										73.303	0.536807
																			8.878	0.326771							3.628	0.133535										66.497	0.486966
																			14.378	0.529208							3.232	0.11896										54.434	0.398627
																			4.099	0.150871							3.404	0.12529										100.936	0.739167
																			4.44	0.163422							3.819	0.140565										98.109	0.718465
																			15.772	0.580517							2.311	0.0850605										38.193	0.279692
																			12.713	0.467925							3.405	0.125327										115.166	0.843375
																			15.897	0.585117							4.915	0.180905										106.315	0.778558
																			9.933	0.365602							2.215	0.081527										69.193	0.506709
																			7.352	0.270603							1.696	0.0624243										97.386	0.71317
																			13.134	0.48342							1.683	0.0619458										59.886	0.438553
																			16.485	0.60676							1.22	0.0449043										99.821	0.731002
																			2.756	0.10144							9.69	0.356658										98.7	0.722793
																			14.823	0.545587							5.719	0.210498										131.056	0.95974
																			14.07	0.517871							3.254	0.119769										52.784	0.386544
																			11.483	0.422652							7.339	0.270125										94.278	0.69041
																			14.058	0.51743							3.305	0.121646										55.196	0.404207
																			8.594	0.316318							10.004	0.368215										66.161	0.484505
																			7.136	0.262653							7.821	0.287866										35.022	0.256471
																			5.172	0.190365							2.413	0.0888148										121.961	0.893136
																			4.887	0.179875							7.808	0.287387										118.062	0.864583
																			4.615	0.169863							9.285	0.341751										34.783	0.25472
																			13.821	0.508707							2.36	0.086864										47.031	0.344414
																			4.108	0.151202							5.667	0.208584
																			6.194	0.227981							8.622	0.317348
																			3.694	0.135964							14.007	0.515553
																			6.209	0.228533							4.03	0.148331
																			5.184	0.190806							4.342	0.159815
																			4.692	0.172697							15.53	0.571609
																			4.273	0.157275							12.128	0.446393
																			5.012	0.184476							15.7	0.577867
																			15.698	0.577793							9.571	0.352278
																			4.613	0.16979							11.976	0.440798
																			3.219	0.118481							7.143	0.262911
																			4.114	0.151423							15.988	0.588467
																			9.018	0.331924							2.705	0.0995624
																			6.137	0.225883							14.245	0.524313
																			6.186	0.227687							13.758	0.506388
																			5.286	0.194561							11.084	0.407966
																			4.428	0.16298							13.584	0.499983
																			5.105	0.187899							7.931	0.291915
																			4.895	0.180169							6.872	0.252936
																			4.445	0.163606							4.761	0.175237
																			3.964	0.145902							4.585	0.168759
																			2.969	0.109279							13.475	0.495971
																			3.531	0.129965							3.913	0.144025
																			2.8	0.103059							6.176	0.227319
																			3.632	0.133682							3.641	0.134014
																			3.7	0.136185							6.038	0.222239
																			3.066	0.11285							5.106	0.187935
																			3.785	0.139314							4.603	0.169422
																			3.509	0.129155							4.157	0.153006
																			3.589	0.1321							4.903	0.180464
																			4.079	0.150135							15.287	0.562665
																			4.405	0.162134							4.542	0.167176
																			2.842	0.104605							3.223	0.118628
																			4.363	0.160588							3.961	0.145792
																			4.651	0.171188							8.706	0.32044
																			3.34	0.122935							5.811	0.213884
																			3.656	0.134566							6.048	0.222607
																			3.311	0.121867							5.007	0.184292
																			4.196	0.154441							4.197	0.154478
																			4.648	0.171078							4.877	0.179507
																			4.225	0.155509							4.767	0.175458
																			3.494	0.128603							4.344	0.159889
																			3.43	0.126247							3.821	0.140639
																			3.33	0.122567							2.833	0.104274
																			3.418	0.125806							2.875	0.10582
																			4.764	0.175348							3.385	0.124591
																			3.09	0.113733							3.526	0.129781
																			2.935	0.108028							2.769	0.101918
																			2.129	0.0783616							3.601	0.132541
																			3.975	0.146307							3.721	0.136958
																			1.736	0.0638966							3.45	0.126983
																			3.877	0.1427							3.663	0.134823
																			1.874	0.0689759							4.038	0.148626
																			1.615	0.059443							4.3	0.158269
																			2.029	0.074681							2.774	0.102102
																			3.531	0.129965							4.253	0.156539
																			2.759	0.10155							4.541	0.16714
																			3.94	0.145019							3.234	0.119033
																			3.647	0.134234							3.558	0.130959
																			4.187	0.15411							3.245	0.119438
																			3.624	0.133388							3.921	0.144319
																			4.918	0.181016							4.499	0.165594
																			3.902	0.14362							4.086	0.150393
																			5.572	0.205087							3.385	0.124591
																			5.154	0.189702							3.317	0.122088
																			3.762	0.138467							3.367	0.123928
																			2.866	0.105488							4.607	0.169569
																			4.771	0.175605							3.008	0.110715
																			4.707	0.17325							2.898	0.106666
																			3.602	0.132578							2.158	0.079429
																			4.363	0.160588							3.798	0.139792
																			5.33	0.19618							1.894	0.0697121
																			4.251	0.156466							1.825	0.0671724
																			5.181	0.190696							1.628	0.0599214
																			4.578	0.168501							3.395	0.124959
																			5.015	0.184586							2.683	0.0987526
																			4.123	0.151754							3.814	0.140381
																			5.209	0.191727							3.552	0.130738
																			5.098	0.187641							4.095	0.150724
																			4.646	0.171004							4.05	0.149067
																			4.773	0.175679							3.539	0.130259
																			6.38	0.234827							4.754	0.174979
																			5.465	0.201149							3.803	0.139976
																			4.455	0.163974							5.409	0.199088
																			4.64	0.170783							5.063	0.186353
																			5.508	0.202732							2.903	0.10685
																			4.818	0.177335							3.667	0.13497
																			6.037	0.222203							4.595	0.169127
																			7.368	0.271192							4.558	0.167765
																			5.843	0.215062							3.585	0.131952
																			7.396	0.272223							4.298	0.158196
																			5.994	0.22062							5.241	0.192904
																			5.626	0.207075							4.131	0.152049
																			7.463	0.274689							4.982	0.183371
																			8.312	0.305938							4.517	0.166256
																			8.236	0.303141							4.725	0.173912
																			7.648	0.281498							3.945	0.145203
																			7.372	0.27134							5.081	0.187015
																											5.052	0.185948
																											4.67	0.171888
																											6.247	0.229932
																											5.329	0.196143
																											4.475	0.16471
																											4.638	0.17071
																											5.414	0.199272
																											5.984	0.220252
																											7.162	0.26361
																											5.758	0.211933
																											7.098	0.261255
																											5.787	0.213001
																											5.607	0.206376
																											5.416	0.199346
																											7.314	0.269205
																											8.106	0.298356
																											7.404	0.272517
																											7.382	0.271708
[truncated: 655 more columns]

## Sheet: F3F
Data for Pre-implantation chimera pie charts
		hEPSC-ACL			Rset-ACL
		Type of contribution	Number of embryos		Type of contribution	Number of embryos
		No Contribution	32		No Contribution	59
		Epiblast (GFP+)	0		Epiblast (GFP+)	0
		Primitive Endoderm (RFP+)	6		Primitive Endoderm (RFP+)	8
		Both Epiblast (GFP+) and Primitive Endoderm (RFP+)	1		Both Epiblast (GFP+) and Primitive Endoderm (RFP+)	0
		Total	39			67
