# Supplementary material for: An in vitro stem cell model of human epiblast and yolk sac interaction
Source: eLife. 2021 Aug 17;10:e63930. doi: 10.7554/eLife.63930 (PMC8370770; doi:10.7554/eLife.63930)
Supplement: Figure 5—figure supplement 1—source data 1. [file elife-63930-fig5-figsupp1-data1.xlsx]

## Sheet: F5FS1D
SOX2 level analsis in hESCs cultured in 3D in the presence of WNT inhibition
units= fluorescence intensity (a.u.)
		Exp 1	32.1469	1			81.2184	2.52648			46.4389	1.44458			Exp 2	43.9011	1			49.0546	1.11739			50.5378	1.15117			Exp 3	37.9228	1			65.1652	1.71837			88.2095	2.32603
		Control	SOX2	rel SOX2		+ XAV	SOX2	rel SOX2		+ IWR1	SOX2	rel SOX2			Control	SOX2	rel SOX2		+ XAV	SOX2	rel SOX2		+ IWR1	SOX2	rel SOX2			Control	SOX2	rel SOX2		+ XAV	SOX2	rel SOX2		+ IWR1	SOX2	rel SOX2					SOX2
			25.474	0.792425			51.163	1.59154			31.247	0.972007				50.706	1.155			115.328	2.62699			118.863	2.70752				78.432	2.0682			53.72	1.41656			102.558	2.70439					hESCs	+XAV	+IWR1
			20.095	0.625099			48.123	1.49697			29.125	0.905997				53.891	1.22755			133.393	3.03849			135.824	3.09386				78.816	2.07833			90.673	2.39099			82.441	2.17392				Number of values	3273	2220	2234
			15.052	0.468226			41.447	1.2893			28.918	0.899558				48.934	1.11464			109.542	2.4952			113.306	2.58094				64.294	1.69539			35.055	0.924379			119.187	3.14289
			19.592	0.609452			44.435	1.38225			32.192	1.0014				50.585	1.15225			87.957	2.00353			89.101	2.02958				67.264	1.77371			195.246	5.14852			66.944	1.76527				Minimum	0.1791	0.2096	0.2641
			17.254	0.536724			46.218	1.43771			38.242	1.1896				40.172	0.915056			149.196	3.39846			152.501	3.47374				55.447	1.4621			166.671	4.39501			89.649	2.36399				25% Percentile	0.7544	0.7822	0.961
			21.044	0.65462			51.491	1.60174			32.024	0.996177				53.839	1.22637			137.121	3.12341			142.969	3.25661				57.381	1.5131			134.612	3.54964			134.344	3.54257				Median	0.9691	1.329	1.488
			26.15	0.813453			43.181	1.34324			35.647	1.10888				52.612	1.19842			138.109	3.14591			142.776	3.25222				63.132	1.66475			86.739	2.28725			87.111	2.29706				75% Percentile	1.202	2.241	2.158
			16.571	0.515478			54.69	1.70125			34.557	1.07497				65.025	1.48117			165.642	3.77307			168.428	3.83653				68.699	1.81155			62.281	1.64231			98.12	2.58736				Maximum	4.044	6.033	6.004
			25.61	0.796656			50.338	1.56587			41.643	1.2954				36.028	0.820662			82.574	1.88091			84.987	1.93587				54.962	1.44931			62.324	1.64345			81.41	2.14673
			27.627	0.859399			45.408	1.41252			38.851	1.20855				52.484	1.1955			35.549	0.809751			35.716	0.813555				70.536	1.85999			36.098	0.951882			85.524	2.25522				Mean	1	1.627	1.66
			29.264	0.910321			51.799	1.61132			34.527	1.07404				35.234	0.802576			102.656	2.33835			105.428	2.40149				61.908	1.63248			63.903	1.68508			92.168	2.43041				Std. Deviation	0.3499	1.034	0.9056
			27.049	0.841419			58.513	1.82018			44.505	1.38443				45.335	1.03266			111.916	2.54927			114.887	2.61695				75.5	1.99089			107.711	2.84027			44.914	1.18435				Std. Error of Mean	0.006117	0.02195	0.01916
			23.324	0.725544			66.768	2.07697			54.766	1.70362				43.584	0.992776			104.886	2.38914			108.706	2.47616				62.53	1.64888			34.5	0.909744			82.096	2.16482
			18.75	0.58326			43.742	1.36069			42.402	1.31901				37.253	0.848566			164.064	3.73713			170.201	3.87692				52.436	1.38271			40.167	1.05918			84.084	2.21724				Lower 95% CI of mean	0.988	1.584	1.622
			17.82	0.55433			41.716	1.29767			48.82	1.51865				39.526	0.900341			123.071	2.80337			126.172	2.874				70.022	1.84644			38.898	1.02572			28.499	0.751501				Upper 95% CI of mean	1.012	1.67	1.697
			27.857	0.866553			49.596	1.54279			57.499	1.78863				38.114	0.868178			29.843	0.679778			29.615	0.674584				71.893	1.89577			80.172	2.11409			93.291	2.46003
			17.062	0.530751			42.828	1.33226			45.864	1.4267				45.359	1.03321			37.548	0.855286			37.994	0.865445				32.455	0.855818			66.97	1.76596			84.29	2.22268				Sum	3273	3612	3708
			23.772	0.739481			43.143	1.34206			39.528	1.22961				41.006	0.934054			41.815	0.952481			41.849	0.953256				44.785	1.18095			43.587	1.14936			69.76	1.83953
			19.763	0.614772			33.286	1.03543			53.89	1.67637				47.995	1.09325			38.692	0.881344			38.463	0.876128				73.826	1.94675			69.958	1.84475			118.986	3.13759				D'Agostino & Pearson normality test
			22.054	0.686038			69.21	2.15293			31.114	0.96787				36.755	0.837222			94.509	2.15277			97.264	2.21552				98.222	2.59005			39.265	1.03539			98.249	2.59077				K2	441.7	394.9	310.9
			32.314	1.0052			38.25	1.18985			41.494	1.29076				35.145	0.800549			37.159	0.846425			37.401	0.851937				77.431	2.04181			48.851	1.28817			116.22	3.06465				P value	<0.0001	<0.0001	<0.0001
			22.355	0.695402			52.215	1.62426			79.776	2.48161				41.272	0.940113			140.388	3.19782			141.516	3.22352				76.749	2.02382			45.067	1.18839			99.056	2.61205				Passed normality test (alpha=0.05)?	No	No	No
			31.572	0.982117			52.592	1.63599			35.25	1.09653				43.301	0.98633			36.483	0.831027			29.282	0.666999				62.181	1.63967			85.158	2.24556			76.99	2.03018				P value summary	****	****	****
			14.775	0.459609			28.966	0.901051			62.715	1.95089				27.282	0.621442			29.787	0.678502			52.471	1.19521				74.478	1.96394			70.604	1.86178			76.103	2.00679
			26.654	0.829131			47.38	1.47386			69.094	2.14932				53.36	1.21546			23.649	0.538688			23.62	0.538027				53.792	1.41846			41.728	1.10034			82.052	2.16366
			26.027	0.809627			19.707	0.61303			48.736	1.51604				44.14	1.00544			52.652	1.19933			28.663	0.652899				81.013	2.13626			35.089	0.925275			82.391	2.1726
			19.361	0.602267			62.646	1.94874			33.757	1.05009				45.619	1.03913			28.229	0.643013			102.139	2.32657				74.865	1.97414			68.717	1.81203			75.299	1.98559				Kruskal-Wallis test
			16.476	0.512522			60.318	1.87632			35.55	1.10586				43.43	0.989269			23.719	0.540282			24.977	0.568938				55.621	1.46669			38.561	1.01683			103.593	2.73168				P value	<0.0001
			17.564	0.546367			50.851	1.58183			54.901	1.70782				48.08	1.09519			28.689	0.653491			31.191	0.710483				40.671	1.07247			74.258	1.95814			85.486	2.25421				Exact or approximate P value?	Approximate
			20.431	0.635551			48.848	1.51952			48.134	1.49731				45.356	1.03314			30.603	0.697089			58.403	1.33033				46.715	1.23185			78.743	2.0764			69.606	1.83547				P value summary	****
			26.322	0.818804			14.123	0.439327			67.795	2.10891				39.118	0.891048			101.045	2.30165			24.434	0.556569				61.179	1.61325			76.342	2.01309			55.314	1.4586				Do the medians vary signif. (P < 0.05)?	Yes
			19.164	0.596139			62.113	1.93216			70.798	2.20233				40.733	0.927835			25.626	0.583721			30.076	0.685085				69.129	1.82289			56.603	1.49259			70.95	1.87091				Number of groups	3
			31.035	0.965412			84.399	2.62542			53.126	1.6526				41.855	0.953392			31.036	0.706952			37.083	0.844694				47.319	1.24777			44.339	1.16919			74.894	1.97491				Kruskal-Wallis statistic	920.6
			19.313	0.600773			63.674	1.98072			33.194	1.03257				40.556	0.923803			56.954	1.29732			27.156	0.618572				77.499	2.0436			82.861	2.18499			62.779	1.65544
			21.413	0.666099			77.15	2.39992			40.082	1.24684				57.357	1.3065			24.349	0.554633			31.683	0.72169				65.319	1.72242			40.248	1.06132			73.948	1.94996				Data summary
			22.808	0.709493			50.972	1.5856			38.131	1.18615				42.429	0.966467			29.96	0.682443			25.679	0.584928				65.171	1.71852			43.565	1.14878			77.24	2.03677				Number of treatments (columns)	3
			26.642	0.828758			89.55	2.78565			28.411	0.883787				34.515	0.786199			37.375	0.851345			47.609	1.08446				65.516	1.72762			47.409	1.25015			53.563	1.41242				Number of values (total)	7727
			18.518	0.576043			61.95	1.92709			45.017	1.40035				39.324	0.89574			26.688	0.607912			118.85	2.70722				62.784	1.65558			36.194	0.954414			50.59	1.33403
			22.786	0.708809			88.149	2.74207			41.085	1.27804				27.862	0.634653			32.484	0.739936			59.007	1.34409				71.069	1.87405			43.836	1.15593			43.115	1.13692
			24.456	0.760758			94.392	2.93627			47.168	1.46726				35.802	0.815514			25.879	0.589484			36.418	0.829546				58.624	1.54588			46.417	1.22399			62.813	1.65634
			21.683	0.674498			46.602	1.44966			50.661	1.57592				46.161	1.05148			46.985	1.07025			33.885	0.771848				71.952	1.89733			66.81	1.76174			52.994	1.39742				Dunn's multiple comparisons test	Mean rank diff.	Significant?	Summary	Adjusted P Value
			24.509	0.762407			21.978	0.683674			45.585	1.41802				37.337	0.850479			21.491	0.489532			29.564	0.673422				70.628	1.86242			77.451	2.04234			76.757	2.02403
			24.245	0.754194			44.962	1.39864			54.567	1.69743				37.202	0.847404			116.572	2.65533			27.842	0.634198				59.679	1.5737			49.883	1.31538			71.89	1.8957				Control vs. +XAV	-1351	Yes	****	<0.0001	A-B
			24.05	0.748128			53.478	1.66355			46.699	1.45268				36.029	0.820685			57.457	1.30878			28.38	0.646453				67.643	1.7837			82.909	2.18626			60.254	1.58886				Control vs. +IWR1	-1714	Yes	****	<0.0001	A-C
			23.009	0.715746			47.324	1.47212			41.163	1.28047				51.44	1.17172			35.909	0.817952			30.781	0.701144				77.211	2.03601			61.997	1.63482			102.894	2.71325				+XAV vs. +IWR1	-362.5	Yes	****	<0.0001	B-C
			27.445	0.853737			43.377	1.34934			43.25	1.34539				42.942	0.978153			31.081	0.707977			29.287	0.667113				63.356	1.67066			61.988	1.63459			70.131	1.84931
			24.33	0.756838			41.203	1.28171			65.358	2.0331				43.321	0.986786			33.641	0.76629			26.141	0.595452				53.004	1.39768			109.973	2.89992			67.756	1.78668
			30.639	0.953094			39.789	1.23772			44.686	1.39006				34.08	0.77629			27.861	0.634631			22.273	0.507345				53.826	1.41936			96.053	2.53286			73.179	1.92969				Test details	Mean rank 1	Mean rank 2	Mean rank diff.	n1	n2
			24.238	0.753976			37.839	1.17707			40.205	1.25067				42.634	0.971137			29.293	0.667249			23.457	0.534314				88.182	2.32531			54.902	1.44773			95.143	2.50886
			31.444	0.978135			37.17	1.15625			43.339	1.34816				45.744	1.04198			27.844	0.634243			46.305	1.05476				68.839	1.81524			104.78	2.76298			70.821	1.86751				Control vs. +XAV	2980	4332	-1351	3273	2220
			26.894	0.836597			45.928	1.42869			20.517	0.638227				49.677	1.13157			28.501	0.649209			28.882	0.657887				82.342	2.17131			42.876	1.13061			92.597	2.44173				Control vs. +IWR1	2980	4694	-1714	3273	2234
			26.677	0.829847			48.241	1.50064			43.207	1.34405				28.004	0.637888			30.569	0.696315			67.429	1.53593				42.054	1.10894			42.937	1.13222			95.679	2.523				+XAV vs. +IWR1	4332	4694	-362.5	2220	2234
			27.757	0.863443			60.953	1.89608			26.329	0.819022				47.007	1.07075			29.122	0.663354			95.684	2.17953				40.738	1.07424			42.011	1.1078			75.391	1.98801
			19.498	0.606528			68.261	2.12341			45.885	1.42735				36.799	0.838225			26.04	0.593151			41.056	0.935192				42.854	1.13003			77.973	2.0561			113.495	2.99279
			19.91	0.619344			23.803	0.740445			38.344	1.19277				30.178	0.687408			22.488	0.512242			130.744	2.97815				32.061	0.845429			61.191	1.61357			91.724	2.41871
			21.592	0.671667			72.674	2.26069			42.743	1.32962				24.673	0.562013			23.392	0.532834			27.135	0.618094				44.778	1.18077			56.501	1.4899			72.22	1.9044
			17.02	0.529445			58.642	1.82419			41.426	1.28865				33.068	0.753238			45.382	1.03373			29.433	0.670438				38.838	1.02413			48.689	1.2839			42.806	1.12877
			19.67	0.611879			51.801	1.61138			38.439	1.19573				29.24	0.666042			28.717	0.654129			34.496	0.785766				83.231	2.19475			54.457	1.436			37.157	0.979807
			19.147	0.59561			63.507	1.97553			44.037	1.36987				29.611	0.674493			66.019	1.50381			26.673	0.60757				48.057	1.26723			73.251	1.93158			74.205	1.95674
			20.081	0.624664			64.148	1.99547			51.823	1.61207				31.752	0.723262			94.121	2.14393			23.947	0.545476				29.459	0.776816			40.343	1.06382			54.593	1.43958
			26.726	0.831371			59.432	1.84876			39.974	1.24348				27.704	0.631054			40.391	0.920045			56.756	1.29281				75.781	1.9983			79.498	2.09631			92	2.42598
			22.207	0.690798			72.779	2.26395			42.975	1.33683				31.378	0.714743			129.436	2.94835			104.496	2.38026				33.757	0.890151			140.591	3.7073			96.678	2.54934
			19.863	0.617882			44.126	1.37264			30.639	0.953094				24.22	0.551694			27.105	0.61741			119.638	2.72517				45.961	1.21196			86.384	2.27789			76.724	2.02316
			27.386	0.851902			65.896	2.04984			39.111	1.21663				27.424	0.624677			47.473	1.08136			23.537	0.536137				50.065	1.32018			46.644	1.22997			111.845	2.94928
			26.876	0.836037			75.23	2.3402			37.979	1.18142				26.918	0.613151			28.545	0.650211			43.914	1.00029				54.473	1.43642			102.917	2.71386			69.55	1.83399
			22.254	0.69226			86.144	2.6797			25.621	0.796998				36.562	0.832826			29.288	0.667136			137.137	3.12377				61.474	1.62103			58.08	1.53153			86.123	2.27101
			22.588	0.70265			41.18	1.28099			40.434	1.25779				28.993	0.660416			34.436	0.784399			176.289	4.01559				30.893	0.814629			60.805	1.60339			92.316	2.43432
			18.425	0.57315			89.297	2.77778			50.305	1.56485				38.743	0.882506			26.254	0.598026			47.32	1.07788				28.479	0.750974			30.572	0.806165			128.777	3.39577
			21.938	0.68243			71.627	2.22812			38.597	1.20064				25.833	0.588436			24.026	0.547275			42.137	0.959816				36.063	0.950959			31.965	0.842897			83.36	2.19815
			15.513	0.482566			58.154	1.80901			34.638	1.07749				23.491	0.535089			55.9	1.27332			57.709	1.31452				67.264	1.77371			88.235	2.3267			98.492	2.59717
			21.908	0.681497			92.709	2.88392			42.812	1.33176				20.306	0.462539			116.852	2.66171			42.881	0.976763				34.962	0.921926			49.889	1.31554			91.95	2.42466
			18.073	0.562201			84.242	2.62053			44.682	1.38993				31.605	0.719913			100.486	2.28892			31.526	0.718114				64.905	1.7115			66.31	1.74855			76.198	2.00929
			19.82	0.616545			69.67	2.16724			51.14	1.59082				26.967	0.614267			23.596	0.537481			23.095	0.526069				41.299	1.08903			59.846	1.5781			74.741	1.97087
			26.275	0.817342			55.545	1.72785			38.028	1.18294				25.572	0.582491			43.79	0.997469			42.979	0.978995				35.045	0.924115			116.764	3.07899			87.807	2.31542
			16.994	0.528636			65.517	2.03805			56.329	1.75224				28.419	0.647341			134.543	3.06468			80.244	1.82783				64.871	1.71061			50.647	1.33553			78.762	2.07691
			15.963	0.496564			61.539	1.91431			30.751	0.956578				24.846	0.565954			173.155	3.9442			46.129	1.05075				44.361	1.16977			30.479	0.803713			102.755	2.70959
			19.307	0.600587			101.819	3.1673			37.454	1.16509				37.461	0.853304			46.488	1.05893			61.498	1.40083				62.411	1.64574			42.952	1.13262			77.734	2.0498
			22.111	0.687811			62.432	1.94209			38.08	1.18456				32.793	0.746974			41.714	0.950181			93.456	2.12878				59.619	1.57212			32.47	0.856214			37.042	0.976775
			23.018	0.716026			68.68	2.13644			40.397	1.25664				24.886	0.566865			56.543	1.28796			30.582	0.696611				32.512	0.857321			77.657	2.04777			79.698	2.10159
			23.715	0.737707			107.022	3.32916			45.52	1.416				28.297	0.644562			42.887	0.9769			67.811	1.54463				35.846	0.945237			31.138	0.82109			68.993	1.8193
			21.706	0.675213			79.126	2.46139			44.735	1.39158				33.151	0.755129			31.39	0.715016			93.026	2.11899				59.066	1.55753			70.766	1.86606			86.448	2.27958
			22.108	0.687718			68.957	2.14506			43.263	1.34579				34.646	0.789183			23.356	0.532014			39.643	0.903007				65.776	1.73447			62.038	1.6359			93.925	2.47674
			28.013	0.871406			49.782	1.54858			49.654	1.5446				29.197	0.665063			42.496	0.967993			40.399	0.920227				52.817	1.39275			51.748	1.36456			77.485	2.04323
			22.459	0.698637			143.511	4.46423			50.108	1.55872				33.424	0.761347			78.354	1.78478			133.868	3.04931				40.927	1.07922			56.226	1.48265			67.345	1.77585
			25.068	0.779795			113.067	3.5172			44.861	1.3955				35.443	0.807337			45.207	1.02975			27.223	0.620098				58.707	1.54807			62.479	1.64753			58.863	1.55218
			21.301	0.662615			72.158	2.24463			62.375	1.94031				31.319	0.713399			59.431	1.35375			88.525	2.01646				51.585	1.36026			94.847	2.50106			96.013	2.5318
			21.849	0.679661			74.686	2.32327			48.665	1.51383				34.809	0.792895			92.708	2.11175			30.48	0.694287				67.935	1.7914			100.661	2.65437			57.77	1.52336
			29.163	0.907179			43.956	1.36735			55.432	1.72433				37.009	0.843008			30.218	0.68832			92.835	2.11464				76.67	2.02174			155.784	4.10793			73.145	1.92879
			19.808	0.616172			114.031	3.54719			41.409	1.28812				30.189	0.687659			66.863	1.52304			44.763	1.01963				59.397	1.56626			62.447	1.64669			81.456	2.14794
			19.647	0.611163			75.488	2.34822			55.043	1.71223				34.52	0.786312			91.462	2.08336			63.655	1.44996				50.247	1.32498			85.904	2.26524			83.917	2.21284
			29.628	0.921644			56.505	1.75771			35.203	1.09507				40.704	0.927174			38.902	0.886128			87.508	1.9933				61.63	1.62515			54.977	1.44971			79.246	2.08967
			23.441	0.729184			59.549	1.8524			53.863	1.67553				45.205	1.0297			39.932	0.909589			98.249	2.23796				54.089	1.42629			34.632	0.913225			68.956	1.81833
			21.69	0.674715			24.303	0.755998			49.853	1.55079				39.098	0.890592			132.257	3.01261			139.207	3.17092				60.628	1.59872			28.388	0.748574			88.768	2.34076
			18.258	0.567955			103.44	3.21773			59.688	1.85673				34.263	0.780458			27.072	0.616658			71.751	1.63438				58.996	1.55569			147.645	3.89331			67.902	1.79053
			21.688	0.674653			118.408	3.68334			45.604	1.41861				40.458	0.921571			86.362	1.96719			44.314	1.0094				68.723	1.81218			121.342	3.19971			61.576	1.62372
			23.547	0.732481			62.178	1.93418			55.01	1.71121				32.109	0.731394			31.24	0.711599			75.512	1.72005				62.815	1.65639			27.783	0.732621			78.993	2.083
			19.401	0.603511			62.854	1.95521			45.97	1.43				28.894	0.658161			91.213	2.07769			32.128	0.731826				60.79	1.60299			28.46	0.750473			71.047	1.87347
			23.761	0.739138			76.56	2.38157			48.794	1.51785				41.666	0.949087			63.001	1.43507			38.101	0.867882				53.607	1.41358			26.863	0.708361			50.717	1.33738
			23.848	0.741845			69.717	2.1687			51.621	1.60579				36.088	0.822029			44.647	1.01699			73.437	1.67278				45.332	1.19538			70.554	1.86047			48.585	1.28116
			27.431	0.853302			56.796	1.76676			50.827	1.58109				45.454	1.03537			95.399	2.17304			21.691	0.494088				64.656	1.70494			63.947	1.68624			61.845	1.63081
			28.2	0.877223			59.589	1.85365			59.712	1.85747				52.891	1.20478			86.42	1.96851			44.376	1.01082				62.689	1.65307			49.771	1.31243			78.759	2.07683
			25.113	0.781195			116.191	3.61438			50.664	1.57602				41.289	0.9405			135.579	3.08828			123.592	2.81524				62.038	1.6359			56.633	1.49338			75.505	1.99102
			23.512	0.731393			78.498	2.44185			42.402	1.31901				38.418	0.875103			81.945	1.86658			52.211	1.18929				62.463	1.64711			61.031	1.60935			50.889	1.34191
			18.006	0.560116			61.423	1.9107			41.217	1.28215				46.806	1.06617			44.158	1.00585			52.647	1.19922				52.179	1.37593			91.003	2.39969			68.905	1.81698
			18.676	0.580958			59.053	1.83697			49.278	1.5329				50.203	1.14355			74.088	1.68761			29.933	0.681828				79.889	2.10662			99.094	2.61305			71.671	1.88992
			20.312	0.63185			67.96	2.11405			55.662	1.73149				55.868	1.27259			33.365	0.760003			30.515	0.695085				69.192	1.82455			62.672	1.65262			67.505	1.78007
			18.598	0.578532			68.706	2.13725			8.914	0.27729				34.354	0.782531			37.789	0.860775			48.511	1.10501				70.856	1.86843			84.659	2.23241			67.374	1.77661
			20.148	0.626748			58.279	1.8129			47.175	1.46748				42.95	0.978335			71.28	1.62365			22.536	0.513335				67.042	1.76786			36.367	0.958975			93.648	2.46944
			19.201	0.597289			54.678	1.70088			29.768	0.925999				42.24	0.962162			21.819	0.497003			26.249	0.597912				72.562	1.91342			53.482	1.41029			71.552	1.88678
			26.29	0.817808			114.946	3.57565			65.379	2.03376				48.009	1.09357			43.691	0.995214			132.558	3.01947				55.463	1.46253			27.629	0.72856			74.007	1.95152
			19.816	0.61642			71.472	2.22329			51.32	1.59642				48.712	1.10958			120.793	2.75148			30.243	0.688889				43.789	1.15469			28.907	0.76226			87.042	2.29524
			19.251	0.598845			55.451	1.72493			54.066	1.68184				44.221	1.00729			51.509	1.1733			102.776	2.34108				65.926	1.73843			30.065	0.792796			18.046	0.475862
			25.624	0.797091			19.401	0.603511			51.395	1.59875				37.394	0.851778			52.522	1.19637			30.765	0.700779				49.948	1.3171			29.792	0.785597			41.365	1.09077
			24.69	0.768037			56.969	1.77215			42.604	1.32529				44.801	1.0205			29.8	0.678798			59.764	1.36133				50.315	1.32678			38.627	1.01857			36.709	0.967994
			20.412	0.63496			56.029	1.74291			49.868	1.55125				49.687	1.13179			30.476	0.694196			57.406	1.30762				71.834	1.89422			34.844	0.918815			65.263	1.72095
			21.119	0.656953			60.431	1.87984			28.516	0.887053				48.146	1.09669			47.935	1.09189			27.445	0.625155				37.995	1.0019			35.643	0.939884			89.323	2.35539
			18.319	0.569853			82.349	2.56165			46.233	1.43818				51.34	1.16945			22.52	0.512971			42.525	0.968654				62.959	1.66019			30.387	0.801287			73.8	1.94606
			15.512	0.482535			74.459	2.31621			41.217	1.28215				37.872	0.862666			129.468	2.94908			65.121	1.48336				54.524	1.43776			59.346	1.56492			37.626	0.992174
			20.288	0.631103			60.98	1.89692			27.083	0.842476				51.083	1.16359			26.103	0.594586			75.808	1.72679				55.895	1.47392			22.638	0.59695			64.327	1.69626
			23.259	0.723523			62.626	1.94812			55.384	1.72284				45.717	1.04136			30.361	0.691577			55.881	1.27288				69.27	1.82661			55.821	1.47197			96.783	2.55211
			17.511	0.544718			70.214	2.18416			46.703	1.4528				44.534	1.01442			100.254	2.28363			20.881	0.475637				49.217	1.29782			56.201	1.48199			74.351	1.96059
			19.62	0.610323			70.532	2.19405			46.413	1.44378				47.641	1.08519			30.843	0.702556			52.837	1.20355				69.517	1.83312			31.477	0.830029			75.713	1.99651
			25.42	0.790745			78.656	2.44677			53.137	1.65294				28.417	0.647296			58.316	1.32835			27.957	0.636817				59.433	1.56721			95.038	2.50609			86.639	2.28462
			16.503	0.513362			55.073	1.71317			53.288	1.65764				52.224	1.18958			56.361	1.28382			27.088	0.617023				48.662	1.28319			33.94	0.894977			44.855	1.1828
			15.716	0.488881			50.771	1.57934			45.152	1.40455				40.51	0.922755			28.445	0.647933			78.839	1.79583				70.678	1.86374			116.564	3.07372			37.557	0.990355
			18.42	0.572995			58.136	1.80845			46.467	1.44546				47.129	1.07353			41.797	0.952071			35.294	0.803943				76.573	2.01918			35.195	0.928071			66.403	1.75101
			20.288	0.631103			69.68	2.16755			50.491	1.57063				61.929	1.41065			63.346	1.44292			26.208	0.596978				65.346	1.72313			56.62	1.49303			90.842	2.39545
			21.666	0.673969			65.043	2.02331			66.756	2.07659				51.357	1.16983			74.568	1.69854			36.152	0.823487				37.909	0.999637			68.971	1.81872			39.398	1.0389
			22.092	0.68722			62.91	1.95695			58.606	1.82307				42.279	0.963051			54.317	1.23726			29.116	0.663218				49.189	1.29708			41.333	1.08993			65.144	1.71781
			21.095	0.656207			59.731	1.85806			45.441	1.41354				39.931	0.909567			20.696	0.471423			26.013	0.592536				43.428	1.14517			41.6	1.09697			73.216	1.93066
			20.639	0.642022			75.765	2.35684			46.741	1.45398				36.586	0.833373			53.229	1.21247			52.404	1.19368				67.756	1.78668			32.824	0.865549			63.493	1.67427
			27.757	0.863443			68.013	2.11569			47.171	1.46736				50.962	1.16084			27.891	0.635314			75.771	1.72595				55.002	1.45037			75.889	2.00115			66.119	1.74352
			20.876	0.649394			52.731	1.64031			48.462	1.50752				36.252	0.825765			26.997	0.61495			28.446	0.647956				65.017	1.71446			36.705	0.967888			141.018	3.71856
			23.481	0.730428			74.832	2.32781			60.124	1.87029				41.765	0.951342			75.484	1.71941			68.982	1.5713				48.533	1.27979			24.108	0.635713			29.454	0.776684
			19.72	0.613434			68.505	2.131			50.113	1.55888				38.663	0.880684			34.84	0.793602			57.792	1.31641				44.699	1.17869			101.348	2.67248			38.469	1.0144
			20.554	0.639378			68.208	2.12176			50.952	1.58497				45.021	1.02551			26.186	0.596477			59.202	1.34853				73.818	1.94654			37.293	0.983393			165.572	4.36603
			18.258	0.567955			73.653	2.29114			38.645	1.20214				48.227	1.09854			36.739	0.836858			25.347	0.577366				38.199	1.00728			21.867	0.576619			75.715	1.99656
			23.14	0.719821			79.96	2.48733			39.771	1.23716				40.066	0.912642			26.073	0.593903			59.324	1.35131				76.751	2.02388			23.883	0.62978			144.667	3.81478
			29.191	0.90805			41.189	1.28127			47.469	1.47663				42.142	0.95993			29.207	0.66529			83.415	1.90007				63.063	1.66293			72.015	1.89899			109.129	2.87766
			17	0.528823			48.403	1.50568			54.263	1.68797				49.606	1.12995			53.677	1.22268			32.651	0.74374				46.552	1.22755			80.553	2.12413			45.678	1.2045
			18.849	0.58634			16.095	0.50067			36.669	1.14067				41.92	0.954873			74.142	1.68884			85.903	1.95674				47.372	1.24917			25.236	0.665458			60.558	1.59688
			31.368	0.975771			65.008	2.02222			48.586	1.51137				42.457	0.967105			28.345	0.645655			48.336	1.10102				46.211	1.21856			60.118	1.58527			70.48	1.85851
			28.83	0.896821			61.782	1.92187			62.168	1.93387				44.676	1.01765			67.858	1.5457			34.728	0.79105				34.433	0.907977			44.71	1.17898			34.459	0.908663
			32.595	1.01394			38.568	1.19974			60.145	1.87094				42.751	0.973802			57.017	1.29876			23.269	0.530032				48.051	1.26708			30.953	0.816212			63.775	1.68171
			36.538	1.1366			66.124	2.05693			55.214	1.71755				38.977	0.887836			58.15	1.32457			67.531	1.53825				60.422	1.59329			22.57	0.595157			88.519	2.33419
			30.911	0.961555			69.692	2.16792			8.49	0.2641				53.603	1.22099			25.509	0.581056			28.103	0.640143				68.043	1.79425			43.705	1.15247			71.762	1.89232
			32.193	1.00143			73.312	2.28053			67.662	2.10478				23.673	0.539234			58.311	1.32823			33.318	0.758933				56.792	1.49757			50.605	1.33442			84.507	2.2284
			29.77	0.926062			38.797	1.20687			55.73	1.7336				35.764	0.814649			81.708	1.86118			25.645	0.584154				65.977	1.73977			58.257	1.5362			57.17	1.50754
			27.415	0.852804			63.06	1.96162			31.345	0.975055				33.619	0.765789			32.388	0.737749			82.913	1.88863				70.38	1.85588			65.494	1.72704			31.282	0.824887
			30.505	0.948925			73.971	2.30103			48.154	1.49794				40.276	0.917425			85.184	1.94036			27.676	0.630417				59.188	1.56075			70.296	1.85366			75.455	1.9897
			28.006	0.871188			49.878	1.55157			39.388	1.22525				44.088	1.00426			47.968	1.09264			56.038	1.27646				65.671	1.7317			34.104	0.899302			14.663	0.386654
			23.59	0.733819			78.878	2.45367			33.427	1.03982				35.387	0.806061			34.892	0.794786			40.282	0.917562				75.563	1.99255			46.113	1.21597			67.507	1.78012
			31.945	0.99372			62.638	1.94849			54.774	1.70387				39.183	0.892528			23.015	0.524246			25.39	0.578345				64.44	1.69924			48.514	1.27928			69.582	1.83483
			28.484	0.886058			74.694	2.32352			49.947	1.55371				38.965	0.887563			65.629	1.49493			49.191	1.1205				51.257	1.35162			63.559	1.67601			123.234	3.2496
			21.227	0.660313			77.205	2.40163			23.469	0.730055				50.191	1.14327			33.135	0.754764			28.506	0.649323				51.783	1.36549			142.271	3.7516			144.904	3.82103
			26.253	0.816657			69.854	2.17296			66.041	2.05435				36.979	0.842325			27.835	0.634038			89.021	2.02776				83.734	2.20801			24.63	0.649478			62.154	1.63896
			22.478	0.699228			31.668	0.985103			52.081	1.62009				35.396	0.806266			25.715	0.585748			38.294	0.872278				66.434	1.75182			69.334	1.82829			69	1.81949
			26.597	0.827358			91.846	2.85707			29.908	0.930354				49.751	1.13325			80.116	1.82492			52.246	1.19008				81.542	2.15021			92	2.42598			87.482	2.30685
			25.812	0.802939			95.688	2.97659			66.746	2.07628				36.919	0.840958			27.563	0.627843			27.021	0.615497				30.922	0.815394			64.685	1.7057			70.292	1.85356
			28.022	0.871686			131.399	4.08746			59.469	1.84991				40.81	0.929589			55.396	1.26184			81.538	1.85731				44.321	1.16872			21.549	0.568234			63.857	1.68387
			25.896	0.805552			84.39	2.62514			60.699	1.88818				42.919	0.977629			39.473	0.899134			32.054	0.730141				39.289	1.03603			24.784	0.653539			74.835	1.97335
			23.409	0.728189			94.215	2.93077			16.477	0.512553				45.941	1.04647			25.316	0.57666			27.018	0.615428				82.534	2.17637			44.364	1.16985			144.597	3.81293
			24.719	0.768939			52.564	1.63512			63.453	1.97385				32.862	0.748546			48.56	1.10612			22.042	0.502083				45.291	1.1943			33.693	0.888464			138.789	3.65978
			27.389	0.851995			104.839	3.26125			56.195	1.74807				40.428	0.920888			86.815	1.97751			52.747	1.2015				29.71	0.783434			39.986	1.05441			94.51	2.49217
			27.472	0.854577			70.468	2.19206			45.337	1.41031				42.975	0.978904			28.176	0.641806			32.112	0.731462				33.091	0.872589			33.973	0.895847			88.679	2.33841
			30.158	0.938131			103.198	3.2102			53.158	1.6536				36.394	0.828999			37.65	0.857609			22.887	0.521331				75.923	2.00204			67.8	1.78784			73.386	1.93514
			26.355	0.81983			101.576	3.15975			67.482	2.09918				33.329	0.759183			51.574	1.17478			28.689	0.653491				53.78	1.41815			38.874	1.02508			102.369	2.69941
			30.624	0.952627			116.833	3.63435			20.198	0.628303				37.784	0.860661			27.182	0.619164			35.53	0.809319				27.789	0.732779			63.488	1.67414			78.484	2.06957
			37.846	1.17728			160.268	4.98549			59.671	1.8562				39.359	0.896537			78.71	1.79289			46.463	1.05836				35.019	0.92343			33.555	0.884825			80.73	2.1288
			38.628	1.20161			80.3	2.49791			52.088	1.62031				38.452	0.875877			31.714	0.722396			36.395	0.829022				62.744	1.65452			34.654	0.913805			88.348	2.32968
			34.706	1.07961			96.416	2.99923			28.65	0.891221				48.899	1.11384			26.907	0.6129			69.155	1.57524				67.033	1.76762			57.912	1.5271			117.031	3.08604
			24.302	0.755967			69.85	2.17284			34.616	1.07681				41.064	0.935375			21.85	0.497709			28.357	0.645929				39.592	1.04402			31.008	0.817662			102.256	2.69643
			34.425	1.07087			83.73	2.60461			52.265	1.62582				46	1.04781			51.648	1.17646			66.985	1.52582				35.027	0.92364			39.274	1.03563			162.513	4.28537
			30.41	0.94597			91.184	2.83648			43.2	1.34383				32.636	0.743398			25.111	0.57199			44.724	1.01874				63.862	1.684			28.399	0.748864			77.151	2.03442
			27.823	0.865496			81.719	2.54205			46.712	1.45308				58.186	1.32539			32.035	0.729708			77.89	1.77421				43.682	1.15187			25.898	0.682914			89.447	2.35866
			28.061	0.872899			107.09	3.33127			62.31	1.93829				39.547	0.90082			22.815	0.519691			27.484	0.626043				32.497	0.856926			25.852	0.681701			64.292	1.69534
			25.098	0.780729			120.09	3.73566			39.686	1.23452				44.409	1.01157			27.201	0.619597			51.137	1.16482				57.816	1.52457			61.755	1.62844			66.105	1.74315
			31.533	0.980904			129.544	4.02975			63.047	1.96122				46.148	1.05118			35.069	0.798818			56.705	1.29165				57.515	1.51664			25.423	0.670389			75.292	1.9854
			34.288	1.0666			110.918	3.45035			58.59	1.82257				31.309	0.713171			45.649	1.03981			27.871	0.634858				40.412	1.06564			48.423	1.27688			35.56	0.937695
			32.314	1.0052			99.669	3.10042			57.282	1.78188				35.106	0.799661			18.685	0.425616			37.18	0.846903				51.233	1.35098			19.662	0.518475			82.09	2.16466
			23.076	0.71783			110.607	3.44067			110.131	3.42587				31.786	0.724036			25.555	0.582104			32.552	0.741484				51.354	1.35417			23.363	0.616068			93.637	2.46915
			32.417	1.0084			77.835	2.42123			50.932	1.58435				81.415	1.85451			36.018	0.820435			44.492	1.01346				63.156	1.66538			19.132	0.504499			89.07	2.34872
			33.592	1.04495			86.231	2.68241			154.89	4.8182				54.874	1.24995			68.052	1.55012			27.162	0.618709				75.531	1.99171			25.893	0.682782			118.031	3.1124
			41.598	1.294			98.088	3.05124			126.75	3.94284				58.137	1.32427			28.257	0.643651			75.851	1.72777				58.906	1.55332			23.875	0.629569			76.199	2.00932
			34.004	1.05777			51.777	1.61064			139.323	4.33395				38.529	0.877631			28.489	0.648936			25.054	0.570692				48.898	1.28941			42.146	1.11136			21.58	0.569051
			35.337	1.09924			92.757	2.88541			142.307	4.42677				41.662	0.948996			65.895	1.50099			84.377	1.92198				51.747	1.36454			35.206	0.928361			52.421	1.38231
			30.82	0.958724			107.918	3.35703			150.181	4.67171				42.662	0.971775			43.997	1.00218			32.925	0.749981				60.842	1.60437			35.964	0.948349			48.522	1.2795
			43.526	1.35397			94.061	2.92597			131.15	4.07971				43.578	0.99264			77.156	1.75749			32.47	0.739617				57.308	1.51118			33.727	0.88936			92.432	2.43738
			30.054	0.934896			100.539	3.12749			125.356	3.89947				29.818	0.679208			27.354	0.623082			23.354	0.531968				60.913	1.60624			21.337	0.562644			94.176	2.48336
			30.592	0.951632			57.3	1.78244			55.255	1.71883				43.69	0.995191			50.3	1.14576			31.958	0.727954				52.46	1.38334			38.357	1.01145			125.601	3.31202
			34.068	1.05976			94.807	2.94918			47.227	1.4691				51.187	1.16596			55.391	1.26172			30.18	0.687454				45.049	1.18791			30.466	0.80337			80.574	2.12469
			28.718	0.893337			81.799	2.54454			49.387	1.53629				49.134	1.1192			27.806	0.633378			31.797	0.724287				61.888	1.63195			32.549	0.858297			83.532	2.20269
			25.677	0.79874			100.215	3.11741			24.433	0.760042				45.977	1.04729			36.622	0.834193			22.016	0.501491				62.001	1.63493			24.267	0.639906			73.844	1.94722
			37.605	1.16979			76.914	2.39258			27.456	0.854079				46.31	1.05487			32.304	0.735835			26.344	0.600076				77.385	2.04059			30.626	0.807589			78.372	2.06662
			24.548	0.76362			60.944	1.8958			18.413	0.572777				61.406	1.39873			42.48	0.967629			25.469	0.580145				71.604	1.88815			24.692	0.651113			63.265	1.66826
			37.306	1.16049			29.624	0.92152			123.053	3.82784				56.81	1.29404			27.137	0.618139			21.247	0.483974				69.343	1.82853			36.655	0.96657			111.908	2.95095
			43.208	1.34408			41.577	1.29334			151.592	4.7156				54.726	1.24657			74.533	1.69775			26.161	0.595907				69.521	1.83323			28.266	0.745357			78.037	2.05779
			37.056	1.15271			120.925	3.76164			114.977	3.57661				48.357	1.1015			24.866	0.566409			26.215	0.597137				42.481	1.1202			113.731	2.99902			96.608	2.54749
			38.388	1.19414			110.528	3.43822			91.528	2.84718				37.379	0.851436			81.434	1.85494			23.496	0.535203				47.032	1.2402			31.37	0.827208			100.638	2.65376
			26.902	0.836846			65.079	2.02443			30.691	0.954711				44.105	1.00464			32.555	0.741553			29.335	0.668206				69.919	1.84372			25.353	0.668543			96.081	2.5336
			24.316	0.756403			51.931	1.61543			38.714	1.20428				46.775	1.06546			32.413	0.738318			24.503	0.558141				57.972	1.52869			43.85	1.1563			114.085	3.00835
			39.656	1.23359			52.123	1.6214			100.529	3.12718				58.582	1.33441			23.127	0.526797			23.514	0.535613				69.371	1.82927			28.553	0.752925			101.493	2.67631
			40.444	1.2581			133.699	4.159			53.382	1.66056				46.964	1.06977			31.935	0.72743			23.889	0.544155				63.701	1.67976			31.45	0.829317			93.44	2.46396
			41.037	1.27655			104.311	3.24482			51.646	1.60656				40.137	0.914259			30.551	0.695905			25.066	0.570965				49.625	1.30858			30.559	0.805822			95.277	2.5124
			28.738	0.893959			76.944	2.39351			34.442	1.07139				62.518	1.42406			31.873	0.726018			28.927	0.658913				69.501	1.8327			59.262	1.5627			119.787	3.15871
			37.961	1.18086			57.531	1.78963			22.648	0.704516				53.359	1.21544			26.739	0.609073			31.478	0.71702				74.915	1.97546			35.522	0.936693			114.777	3.0266
			36.214	1.12652			101.021	3.14248			102.435	3.18647				58.05	1.32229			22.072	0.502766			25.66	0.584495				55.172	1.45485			29.67	0.78238			62.756	1.65484
			36.69	1.14132			112.422	3.49713			48.221	1.50002				67.168	1.52998			25.188	0.573744			27.14	0.618207				57.273	1.51025			34.371	0.906342			60.501	1.59537
			52	1.61757			68.641	2.13523			33.206	1.03295				48.982	1.11573			21.328	0.485819			51.123	1.1645				63.146	1.66512			84.541	2.22929			94.707	2.49737
			19.614	0.610137			94.419	2.93711			51.762	1.61017				50.235	1.14428			26.601	0.60593			45.064	1.02649				41.68	1.09908			43.723	1.15295			72.739	1.91808
			28.235	0.878312			60.271	1.87486			127.086	3.95329				48.685	1.10897			26.18	0.59634			98.82	2.25097				71.736	1.89163			38.437	1.01356			82.301	2.17023
			26.195	0.814853			67.552	2.10135			31.591	0.982708				51.936	1.18302			23.514	0.535613			72.05	1.64119				38.377	1.01198			31.494	0.830477			79.081	2.08532
			39.218	1.21996			72.061	2.24162			116.274	3.61696				42.58	0.969907			29.697	0.676452			46.938	1.06918				76.135	2.00763			38.316	1.01037			78.433	2.06823
			27.082	0.842445			74.737	2.32486			83.483	2.59692				57.11	1.30088			21.972	0.500488			84.407	1.92266				59.04	1.55685			40.65	1.07192			62.422	1.64603
			26.091	0.811618			61.288	1.9065			57.836	1.79912				51.668	1.17692			24.267	0.552765			23.134	0.526957				46.054	1.21442			62.64	1.65178			72.391	1.90891
			45.669	1.42064			52.914	1.64601			68.064	2.11728				52.584	1.19778			23.645	0.538597			31.531	0.718228				44.5	1.17344			136.305	3.59428			114.152	3.01012
			28.183	0.876694			80.37	2.50009			69.439	2.16005				47.955	1.09234			24.042	0.54764			110.763	2.52301				66.398	1.75087			70.148	1.84976			59.717	1.5747
			18.5	0.575483			49.323	1.5343			47.39	1.47417				32.646	0.743626			24.754	0.563858			19.291	0.439419				65.068	1.7158			85.401	2.25197			52.854	1.39373
			44.074	1.37102			54.403	1.69233			50.122	1.55916				44.551	1.0148			28.834	0.656794			75.005	1.7085				60.584	1.59756			54.682	1.44193			104.302	2.75038
			31.43	0.977699			67.618	2.10341			35.566	1.10636				44.752	1.01938			31.053	0.70734			23.963	0.54584				59.757	1.57576			43.692	1.15213			80.105	2.11232
			14.587	0.453761			102.704	3.19483			39.691	1.23468				36.744	0.836972			25.695	0.585293			37.64	0.857381				43.813	1.15532			77.372	2.04025			52.521	1.38495
			35.697	1.11043			125.916	3.9169			63.213	1.96638				52.723	1.20095			27.115	0.617638			25.072	0.571102				60.604	1.59809			35.281	0.930338			96.81	2.55282
			37.476	1.16577			59.853	1.86186			52.209	1.62408				47.295	1.07731			15.12	0.34441			27.266	0.621078				48.55	1.28023			37.877	0.998793			60.77	1.60247
			31.989	0.995088			72.495	2.25512			17.852	0.555326				42.637	0.971205			50.843	1.15813			21.489	0.489486				71.505	1.88554			129.453	3.4136			106.194	2.80027
			15.62	0.485895			45.741	1.42287			28.015	0.871468				53.941	1.22869			45.255	1.03084			24.753	0.563835				71.19	1.87724			59.77	1.5761			68.396	1.80356
			39.386	1.22519			56.952	1.77162			60.069	1.86858				42.319	0.963962			96.732	2.20341			23.042	0.524861				42.99	1.13362			80.407	2.12028			60.097	1.58472
			26.814	0.834109			78.395	2.43865			32.3	1.00476				40.96	0.933006			70.384	1.60324			29.628	0.67488				69.671	1.83718			91.546	2.41401			65.417	1.72501
			35.662	1.10935			73.081	2.27335			59.465	1.84979				49.651	1.13097			46.485	1.05886			39.225	0.893485				40.783	1.07542			55.563	1.46516			115.356	3.04187
			34.929	1.08654			125.636	3.90818			44.638	1.38856				66.686	1.519			83.372	1.89909			41.906	0.954554				71.57	1.88726			28.924	0.762708			94.814	2.50019
			39.291	1.22223			118.551	3.68779			65.063	2.02393				46.979	1.07011			31.13	0.709093			30.836	0.702397				49.083	1.29429			39.571	1.04346			113.437	2.99126
			44.65	1.38894			84.485	2.62809			29.148	0.906713				44.694	1.01806			23.142	0.527139			36.055	0.821277				73.943	1.94983			19.7	0.519477			55.468	1.46266
			32.237	1.0028			120.989	3.76363			56.592	1.76042				48.167	1.09717			108.407	2.46934			31.789	0.724104				53.089	1.39992			26.067	0.687371			109.681	2.89222
			27.668	0.860674			104.362	3.24641			46.532	1.44748				38.173	0.869522			19.164	0.436526			33.177	0.755721				53.751	1.41738			70.253	1.85253			110.382	2.91071
			25.951	0.807263			80.776	2.51272			49.432	1.53769				44.35	1.01022			74.257	1.69146			36.905	0.840639				44.046	1.16147			32.917	0.868001			126.937	3.34725
			30.448	0.947152			77.427	2.40854			23.805	0.740507				57.812	1.31687			23.732	0.540578			25.609	0.583334				54.772	1.4443			54.034	1.42484			46.896	1.23662
			36.943	1.14919			56.282	1.75078			88.785	2.76185				39.52	0.900205			37.653	0.857677			96.077	2.18849				61.052	1.6099			103.862	2.73878			120.115	3.16736
			26.083	0.811369			89.992	2.7994			83.777	2.60607				54.924	1.25108			24.722	0.563129			41.499	0.945283				44.398	1.17075			71.002	1.87228			66.455	1.75238
			23.206	0.721874			56.804	1.76701			84.717	2.63531				42.196	0.96116			27.295	0.621738			101.714	2.31689				68.914	1.81722			31.757	0.837413			61.737	1.62797
			21.838	0.679319			142.146	4.42176			66.912	2.08145				50.331	1.14646			21.52	0.490192			43.84	0.998608				72.045	1.89978			61.013	1.60888			99.4	2.62112
			26.133	0.812925			83.908	2.61014			80.476	2.50338				54.341	1.2378			24.958	0.568505			22.229	0.506342				47.975	1.26507			104.127	2.74577			76.15	2.00803
			39.684	1.23446			85.112	2.6476			60.246	1.87408				57.643	1.31302			23.08	0.525727			37.756	0.860024				53.576	1.41277			55.938	1.47505			87.195	2.29928
			50.993	1.58625			77.784	2.41964			37.465	1.16543				36.35	0.827997			29.402	0.669732			39.399	0.897449				45.105	1.18939			46.583	1.22837			84.393	2.22539
			14	0.435501			88.432	2.75087			41.119	1.2791				39.034	0.889134			45.792	1.04307			38.721	0.882005				40.964	1.0802			22.774	0.600536			86.215	2.27344
			30.703	0.955085			96.259	2.99435			45.973	1.43009				47.275	1.07685			30.72	0.699754			110.51	2.51725				56.416	1.48766			38.243	1.00844			66.429	1.75169
			31.342	0.974962			94.042	2.92538			50.709	1.57742				90.538	2.06232			41.885	0.954076			213.202	4.85641				62.212	1.64049			34.076	0.898563			74.687	1.96945
			37.813	1.17626			107.602	3.3472			16.77	0.521668				45.943	1.04651			35.428	0.806995			47.205	1.07526				61.734	1.62789			42.068	1.10931			75.793	1.99861
			34.45	1.07164			101.164	3.14693			31.622	0.983672				46.53	1.05988			31.491	0.717316			53.028	1.2079				47.455	1.25136			37.421	0.986769			116.373	3.06868
			22.871	0.711453			63.334	1.97014			38.894	1.20988				55.353	1.26086			33.032	0.752418			41.275	0.940181				39.571	1.04346			153.213	4.04013			63.535	1.67538
			36.891	1.14758			62.068	1.93076			42.715	1.32874				45.835	1.04405			36.925	0.841095			59.285	1.35042				52.046	1.37242			31.654	0.834697			80.139	2.11322
			17.209	0.535324			80.144	2.49306			36.84	1.14599				46.796	1.06594			25.642	0.584085			33.731	0.76834				63.743	1.68086			37.795	0.996631			57.669	1.5207
			36.958	1.14966			104.158	3.24006			36.715	1.1421				62.964	1.43422			47.714	1.08685			27.954	0.636749				57.993	1.52924			39.316	1.03674			110.726	2.91978
			19.373	0.60264			91.284	2.83959			30.838	0.959284				55.997	1.27553			94.237	2.14657			60.684	1.38229				58.364	1.53902			28.77	0.758647			87.672	2.31186
			35.67	1.10959			55.445	1.72474			33.488	1.04172				54.454	1.24038			40.794	0.929225			85.051	1.93733				153.377	4.04446			28.226	0.744302			93.805	2.47358
			21.18	0.658851			107.627	3.34798			30.153	0.937976				46.845	1.06706			99.609	2.26894			114.87	2.61656				43.524	1.1477			27.097	0.714531			102.386	2.69986
			37.602	1.16969			117.938	3.66872			42.759	1.33011				39.293	0.895034			43.256	0.985305			74.143	1.68886				55.421	1.46142			26.182	0.690403			50.92	1.34273
			17.97	0.558997			90.311	2.80932			37.915	1.17943				46.892	1.06813			22.673	0.516456			26.001	0.592263				45.611	1.20273			27.826	0.733755			86.663	2.28525
			32.587	1.01369			76.207	2.37059			27.251	0.847702				59.192	1.3483			38.266	0.871641			45.48	1.03596				70.849	1.86824			23.444	0.618204			63.457	1.67332
			13.518	0.420507			70.824	2.20314			34.156	1.0625				50.599	1.15257			39.071	0.889977			41.717	0.950249				62.393	1.64527			67.297	1.77458			110.988	2.92669
			20.151	0.626841			74.359	2.3131			41.439	1.28905				51.282	1.16813			37.974	0.864989			66.262	1.50935				59.148	1.5597			41.902	1.10493			69.166	1.82386
			35.853	1.11529			103.997	3.23506			43.745	1.36078				63.374	1.44356			107.647	2.45203			58.932	1.34238				73.947	1.94994			77.531	2.04444			64.198	1.69286
			30.141	0.937602			65.039	2.02318			32.78	1.01969				56.258	1.28147			210.192	4.78785			31.954	0.727863				50.363	1.32804			31.586	0.832903			71.105	1.875
			26.404	0.821355			83.872	2.60902			29.571	0.919871				45.934	1.04631			46.547	1.06027			30.035	0.684151				43.588	1.14939			93.177	2.45702			120.651	3.18149
			20.368	0.633592			67.209	2.09068			46.589	1.44925				59.821	1.36263			51.905	1.18232			24.073	0.548346				52.64	1.38808			108.755	2.8678			70.275	1.85311
			26.506	0.824528			96.307	2.99584			30.341	0.943824				67.046	1.5272			40.507	0.922687			31.104	0.708501				65.603	1.72991			42.965	1.13296			75.632	1.99437
			11.867	0.369149			87.961	2.73622			39.612	1.23222				51.279	1.16806			58.204	1.3258			34.604	0.788226				48.681	1.28369			71.389	1.88248			72.386	1.90877
			19.119	0.594739			65.699	2.04371			29.026	0.902918				51.536	1.17391			33.417	0.761188			29.031	0.661281				41.352	1.09043			64.153	1.69168			86.773	2.28815
			31.863	0.991169			137.924	4.29043			30.203	0.939531				53.532	1.21938			27.966	0.637022			23.035	0.524702				44.22	1.16605			40.835	1.07679			50.943	1.34334
			32.359	1.0066			97.01	3.01771			43.975	1.36794				50.435	1.14883			61.101	1.39179			19.48	0.443724				68.339	1.80206			41.358	1.09059			79.4	2.09373
			28.487	0.886151			138.386	4.3048			46.245	1.43855				44.596	1.01583			82.901	1.88836			19.542	0.445137				78.552	2.07137			33.733	0.889518			114.239	3.01241
			35.251	1.09656			117.41	3.6523			37.913	1.17937				56.46	1.28607			112.03	2.55187			27.065	0.616499				72.422	1.90972			34.588	0.912064			89.893	2.37042
			33.582	1.04464			121.159	3.76892			27.217	0.846645				54.575	1.24313			72.877	1.66003			55.516	1.26457				58.059	1.53098			32.018	0.844295			110.472	2.91308
			47.482	1.47703			38.367	1.19349			31.97	0.994497				52.801	1.20273			26.094	0.594381			23.598	0.537526				44.537	1.17441			79.921	2.10747			86.148	2.27167
			24.81	0.77177			61.038	1.89872			47.853	1.48857				47.773	1.0882			44.818	1.02089			27.065	0.616499				48.271	1.27288			26.397	0.696073			81.167	2.14032
			17.716	0.551095			90.356	2.81072			36.021	1.12051				35.084	0.79916			41.216	0.938837			76.119	1.73387				44.692	1.1785			93.939	2.47711			87.686	2.31223
			32.937	1.02458			88.676	2.75846			48.888	1.52077				48.099	1.09562			65.497	1.49192			23.275	0.530169				54.952	1.44905			24.353	0.642174			83.26	2.19552
			18.666	0.580647			75.787	2.35752			35.086	1.09143				46.804	1.06612			58.039	1.32204			78.937	1.79806				41.209	1.08666			38.619	1.01836			100.93	2.66146
			34.592	1.07606			51.969	1.61661			27.832	0.865776				39.75	0.905444			32.689	0.744605			24.549	0.559188				41.139	1.08481			40.487	1.06762			89.227	2.35286
			26.055	0.810498			35.277	1.09737			38.107	1.1854				51.864	1.18138			29.968	0.682625			60.779	1.38445				68.424	1.8043			76.073	2.006			95.999	2.53143
			48.512	1.50907			52.021	1.61823			36.402	1.13236				48.373	1.10186			23.854	0.543357			23.389	0.532765				35.145	0.926752			20.69	0.545583			47.706	1.25798
			25.086	0.780355			76.457	2.37836			49.605	1.54307				42.824	0.975465			31.414	0.715563			26.794	0.610326				51.866	1.36767			27.568	0.726951			90.795	2.39421
			30.611	0.952223			90.337	2.81013			30.987	0.963919				54.671	1.24532			34.057	0.775766			32.384	0.737658				70.36	1.85535			103.245	2.72251			103.15	2.72
			42.815	1.33186			97.777	3.04157			31.051	0.96591				43.304	0.986398			28.948	0.659391			26.259	0.59814				48.181	1.2705			34.573	0.911669			100.646	2.65397
			27.32	0.849849			111.134	3.45707			44.56	1.38614				41.379	0.94255			23.104	0.526274			25.964	0.59142				41.175	1.08576			87.814	2.3156			49.007	1.29228
			38.622	1.20142			31.498	0.979815			34.924	1.08639				66.32	1.51067			19.62	0.446913			73.523	1.67474				48.035	1.26665			39.822	1.05008			61.335	1.61737
			32.741	1.01848			103.231	3.21123			46.342	1.44157				48.732	1.11004			19.426	0.442494			55.145	1.25612				55.685	1.46838			50.98	1.34431			107.3	2.82944
			40.194	1.25032			63.092	1.96262			30.568	0.950885				47.253	1.07635			45.875	1.04496			31.628	0.720437				37.091	0.978067			54.386	1.43413			100.076	2.63894
			23.028	0.716337			103.028	3.20491			39.262	1.22133				47.075	1.0723			26.64	0.606818			30.553	0.69595				34.877	0.919685			21.803	0.574932			87.346	2.30326
			27.119	0.843596			80.389	2.50068			32.233	1.00268				52.266	1.19054			54.77	1.24758			18.994	0.432654				37.434	0.987112			117.447	3.09701			75.645	1.99471
			24.266	0.754847			72.154	2.24451			39.073	1.21545				41.126	0.936787			23.231	0.529166			18.624	0.424226				48.286	1.27327			69.556	1.83415			122.404	3.22772
			31.229	0.971447			40.441	1.25801			42.921	1.33515				46.574	1.06088			27.219	0.620007			43.41	0.988813				73.102	1.92765			117.554	3.09983			104.347	2.75157
			25.317	0.787541			78.751	2.44972			61.615	1.91667				59.422	1.35354			75.006	1.70852			43.965	1.00146				55.827	1.47212			26.06	0.687186			103.761	2.73611
			20.894	0.649954			112.925	3.51278			45.608	1.41874				41.025	0.934486			23.043	0.524884			26.421	0.60183				23.684	0.624533			75.929	2.0022			114.127	3.00946
			36.129	1.12387			98.64	3.06841			49.727	1.54687				57.557	1.31106			77.255	1.75975			23.029	0.524565				58.745	1.54907			75.355	1.98707			150.915	3.97954
			29.348	0.912934			170.405	5.30082			43.874	1.3648				49.877	1.13612			24.953	0.568391			25.887	0.589666				32.293	0.851547			89.355	2.35624			117.916	3.10937
			36.933	1.14888			135.385	4.21145			39.097	1.2162				43.817	0.998084			59.371	1.35238			24.711	0.562879				35.759	0.942943			115.108	3.03533			94.801	2.49984
			41.92	1.30401			105.303	3.27568			37.157	1.15585				57.286	1.30489			44.285	1.00874			55.166	1.2566				24.369	0.642596			93.186	2.45726			100.858	2.65956
			20.886	0.649705			146.301	4.55102			48.57	1.51088				53.621	1.2214			23.23	0.529144			57.816	1.31696				28.011	0.738633			50.71	1.33719			131.392	3.46473
			19.844	0.617291			97.026	3.01821			40.01	1.2446				38.02	0.866037			26.82	0.610918			26.29	0.598846				40.505	1.06809			19.062	0.502653			132.115	3.48379
			26.104	0.812023			111.867	3.47987			42.76	1.33014				41.651	0.948746			32.16	0.732555			52.25	1.19017				40.182	1.05957			29.935	0.789368			88.134	2.32404
			33.144	1.03102			112.51	3.49987			47.842	1.48823				47.514	1.0823			26.011	0.592491			35.588	0.81064				33.224	0.876096			20.484	0.54015			101.367	2.67299
			24.584	0.76474			161.462	5.02263			29.556	0.919405				90.116	2.0527			25.731	0.586113			19.476	0.443633				47.198	1.24458			71.362	1.88177			153.468	4.04686
			24.774	0.77065			115.902	3.60539			34.458	1.07189				38.599	0.879226			73.819	1.68148			32.571	0.741917				24.775	0.653302			30.497	0.804187			74.65	1.96847
			17.386	0.54083			145.318	4.52044			20.97	0.652318				48.7	1.10931			53.773	1.22487			22.734	0.517846				45.963	1.21202			28.845	0.760625			81.734	2.15528
			39.439	1.22684			178.46	5.55139			20.064	0.624135				49.861	1.13576			31.665	0.72128			31.649	0.720915				42.363	1.11709			51.171	1.34935			64.744	1.70726
			17.912	0.557192			89.476	2.78335			16.591	0.5161				58.223	1.32623			30.441	0.693399			26.955	0.613993				40.932	1.07935			71.038	1.87323			91.565	2.41451
			20.141	0.62653			180.935	5.62838			36.935	1.14894				45.675	1.04041			18.896	0.430422			53.112	1.20981				32.295	0.851599			43.738	1.15334			125.366	3.30582
			27.391	0.852057			162.974	5.06967			44.024	1.36946				32.097	0.73112			18.815	0.428577			18.524	0.421948				55.197	1.45551			20.56	0.542155			78.881	2.08004
			30.346	0.943979			99.699	3.10136			47.9	1.49004				52.602	1.19819			43.245	0.985055			85.094	1.93831				41.701	1.09963			28.774	0.758753			84.679	2.23293
			29.2	0.90833			178.437	5.55068			40.529	1.26074				62.241	1.41775			43.291	0.986102			53.353	1.2153				41.831	1.10306			60.257	1.58894			100.429	2.64825
			31.15	0.968989			71.976	2.23897			21.155	0.658073				57.034	1.29915			26.507	0.603789			37.032	0.843532				47.522	1.25313			71.835	1.89424			102.114	2.69268
			32.048	0.996924			120	3.73286			68.195	2.12136				61.638	1.40402			25.127	0.572354			25.194	0.573881				46.068	1.21478			24.263	0.6398			106.557	2.80984
			33.017	1.02707			116.509	3.62427			66.534	2.06969				38.237	0.87098			22.942	0.522583			29.938	0.681942				32.556	0.858482			22.518	0.593786			83.067	2.19043
			26.027	0.809627			41.936	1.30451			34.557	1.07497				51.381	1.17038			24.638	0.561216			42.904	0.977287				51.603	1.36074			71.389	1.88248			95.295	2.51287
			24.064	0.748564			90.01	2.79996			44.019	1.36931				50.121	1.14168			54.8	1.24826			40.587	0.924509				32.72	0.862806			26.79	0.706436			65.922	1.73832
			26.572	0.826581			115.468	3.59189			58.748	1.82749				38.879	0.885604			56.219	1.28058			26.61	0.606135				59.136	1.55938			38.626	1.01854			122.144	3.22086
			27.31	0.849538			115.409	3.59005			39.76	1.23682				54.384	1.23878			26.233	0.597547			48.832	1.11232				52.916	1.39536			55.753	1.47017			106.004	2.79526
			37.712	1.17311			183.299	5.70192			68.684	2.13657				35.95	0.818886			52.857	1.204			24.679	0.56215				48.242	1.27211			14.54	0.383411			33.428	0.881476
			34.336	1.0681			141.247	4.3938			42.826	1.3322				41.043	0.934896			35.531	0.809341			66.348	1.51131				43.563	1.14873			126.07	3.32439			134.84	3.55565
			39.977	1.24357			114.836	3.57223			42.856	1.33313				35.665	0.812394			19.4	0.441902			28.26	0.643719				45.42	1.1977			20.929	0.551885			140.808	3.71302
			39.929	1.24208			92.929	2.89076			58.083	1.8068				46.036	1.04863			32.146	0.732236			92.239	2.10106				59	1.55579			46.516	1.2266			109.753	2.89412
			20.987	0.652847			103.633	3.22373			47.273	1.47053				36.934	0.8413			22.85	0.520488			41.403	0.943097				41.198	1.08637			106.139	2.79882			140.943	3.71658
			34.081	1.06016			104.369	3.24663			45.173	1.40521				45.724	1.04152			31.24	0.711599			26.996	0.614927				49.526	1.30597			39.266	1.03542			133.198	3.51235
			26.198	0.814947			148.208	4.61034			67.033	2.08521				39.749	0.905421			26.936	0.613561			55.038	1.25368				43.713	1.15268			37.208	0.981152			145.899	3.84727
			32.183	1.00112			103.669	3.22485			41.912	1.30377				39.079	0.890159			54.341	1.2378			29.905	0.68119				58.299	1.53731			42.442	1.11917			145.632	3.84023
			21.972	0.683488			83.235	2.58921			46.057	1.4327				48.449	1.10359			18.538	0.422267			78.768	1.79421				59.038	1.5568			32.069	0.84564			122.752	3.23689
			27.652	0.860176			149.188	4.64082			48.914	1.52158				46.523	1.05972			84.095	1.91555			22.429	0.510898				53.509	1.411			36.171	0.953807			55.234	1.45649
			22.266	0.692633			41.077	1.27779			47.791	1.48664				43.816	0.998061			52.452	1.19478			52.371	1.19293				55.528	1.46424			151.815	4.00327			49.154	1.29616
			36.271	1.12829			159.744	4.96919			38.086	1.18475				49.632	1.13054			36.974	0.842211			26.683	0.607798				54.68	1.44188			32.013	0.844163			110.53	2.91461
			34.3	1.06698			119.528	3.71818			38.592	1.20049				45.11	1.02754			25.17	0.573334			43.142	0.982708				55.152	1.45432			28.786	0.759069			95.537	2.51925
			32.008	0.995679			117.332	3.64987			42.731	1.32924				44.776	1.01993			30.137	0.686474			21.172	0.482266				60.857	1.60476			37.309	0.983815			128.909	3.39925
			22.016	0.684856			128.719	4.00409			37.088	1.1537				49.474	1.12694			42.017	0.957083			57.241	1.30386				42.612	1.12365			39.722	1.04744			85.467	2.25371
			28.207	0.877441			73.6	2.28949			36.609	1.1388				44.002	1.0023			40.91	0.931867			24.606	0.560487				73.206	1.9304			20.779	0.547929			137.809	3.63394
			56.427	1.75529			122.276	3.80366			36.543	1.13675				53.409	1.21657			27.025	0.615588			64.129	1.46076				69.879	1.84267			23.445	0.61823			63.016	1.66169
			21.929	0.68215			92.995	2.89281			37.429	1.16431				57.428	1.30812			48.323	1.10072			24.049	0.547799				50.105	1.32124			27.784	0.732647			106.518	2.80881
			34.552	1.07482			83.114	2.58544			40.6	1.26295				43.134	0.982526			24.865	0.566386			38.275	0.871846				49.874	1.31515			41.228	1.08716			46.666	1.23055
			21.617	0.672444			78.053	2.42801			55.266	1.71917				53.885	1.22742			65.279	1.48696			29.032	0.661304				44.469	1.17262			41.968	1.10667			90.23	2.37931
			40.958	1.27409			36.109	1.12325			48.841	1.51931				54.005	1.23015			27.568	0.627957			25.337	0.577138				58.673	1.54717			39.779	1.04895			102.962	2.71504
			23.363	0.726758			13.003	0.404487			37.409	1.16369				55.732	1.26949			91.528	2.08487			33.014	0.752008				50.248	1.32501			32.771	0.864151			48.772	1.28609
			18.874	0.587117			36.208	1.12633			44.212	1.37531				47.706	1.08667			40.432	0.920979			72.97	1.66214				48.312	1.27396			36.173	0.95386			60.006	1.58232
			28.108	0.874361			124.496	3.87272			40.883	1.27176				63.848	1.45436			26.757	0.609483			29.03	0.661259				51.702	1.36335			38.429	1.01335			105.971	2.79439
			17.333	0.539181			120.689	3.7543			43.184	1.34333				35.87	0.817063			53.696	1.22311			23.89	0.544177				46.473	1.22546			82.391	2.1726			86.401	2.27834
			25.579	0.795691			149.758	4.65855			44.249	1.37646				41.72	0.950317			29.683	0.676133			30.717	0.699686				45.751	1.20643			86.247	2.27428			76.544	2.01842
			38.396	1.19439			120.582	3.75097			30.893	0.960995				61.789	1.40746			77.589	1.76736			39.546	0.900797				62.305	1.64294			48.268	1.2728			124.475	3.28233
			26.892	0.836535			104.679	3.25627			38.296	1.19128				36.308	0.82704			23.07	0.525499			63.063	1.43648				37.692	0.993915			47.524	1.25318			98.897	2.60785
			37.246	1.15862			129.574	4.03069			45.284	1.40866				41.136	0.937015			22.447	0.511308			27.6	0.628686				23.188	0.611453			112.846	2.97568			106.709	2.81385
			16.251	0.505523			123.162	3.83123			39.959	1.24301				40.483	0.92214			51.081	1.16355			62.958	1.43409				48.826	1.28751			101.453	2.67525			154.474	4.07338
			25.758	0.801259			68.218	2.12207			51.129	1.59048				35.608	0.811095			26.615	0.606249			20.783	0.473405				42.057	1.10902			85.469	2.25377			94.73	2.49797
			16.066	0.499768			70.693	2.19906			78.376	2.43806				47.948	1.09218			13.761	0.313454			36.24	0.825491				43.151	1.13787			67.4	1.7773			101.39	2.67359
			39.399	1.22559			82.054	2.55247			30.757	0.956764				42.72	0.973096			41.486	0.944987			24.752	0.563812				46.834	1.23498			117.435	3.09669			90.974	2.39893
			28.197	0.87713			69.149	2.15103			43.108	1.34097				51.549	1.17421			22.373	0.509622			54.502	1.24147				43.414	1.1448			123.608	3.25947			82.704	2.18085
			27.447	0.853799			59.054	1.837			40.445	1.25813				35.192	0.80162			56.091	1.27767			23.079	0.525704				47.358	1.2488			79.283	2.09064			76.093	2.00653
			30.69	0.95468			78.386	2.43837			46.038	1.43211				46.024	1.04836			24.297	0.553448			27.779	0.632763				49.139	1.29577			87.978	2.31993			150.91	3.9794
			32.951	1.02501			59.646	1.85542			25.425	0.790901				44.501	1.01366			62.97	1.43436			48.534	1.10553				47.53	1.25334			76.461	2.01623			60.873	1.60518
			23.999	0.746542			75.57	2.35077			38.022	1.18276				47.456	1.08097			25.452	0.579757			33.49	0.762851				47.5	1.25255			119.311	3.14616			88.207	2.32596
			31.154	0.969114			76	2.36415			39.21	1.21971				47.441	1.08063			23.9	0.544405			26.718	0.608595				44.381	1.1703			93.262	2.45926			122.054	3.21849
			37.874	1.17815			53.972	1.67892			76.528	2.38057				49.142	1.11938			37.55	0.855331			43.984	1.00189				43.944	1.15878			115.549	3.04696			88.264	2.32747
			41.601	1.29409			83.897	2.6098			38.888	1.2097				40.973	0.933302			28.722	0.654243			22.876	0.52108				36.427	0.960558			115.472	3.04493			91.143	2.40338
			30.223	0.940153			69.052	2.14801			76.839	2.39025				41.912	0.954691			25.444	0.579575			25.268	0.575566				49.204	1.29748			82.266	2.1693			127.594	3.36458
			41.429	1.28874			63.039	1.96097			13.232	0.411611				47.223	1.07567			32.449	0.739138			28.067	0.639323				45.013	1.18697			52.747	1.39091			100.717	2.65585
			33.174	1.03195			75.922	2.36172			20.175	0.627588				58.126	1.32402			71.906	1.63791			26.43	0.602035				37.449	0.987507			50.875	1.34154			81.853	2.15841
			39.898	1.24112			79.921	2.48612			37.335	1.16139				49.173	1.12009			29.36	0.668776			20.81	0.47402				70.432	1.85725			37.247	0.982181			94.269	2.48582
			38.922	1.21075			91.963	2.86071			44.57	1.38645				40.951	0.932801			24.018	0.547093			20.783	0.473405				46.326	1.22159			62.691	1.65312			122.883	3.24035
			26.27	0.817186			72.441	2.25344			40.266	1.25256				39.812	0.906856			30.88	0.703399			28.959	0.659641				57.333	1.51184			73.72	1.94395			57.049	1.50435
			31.152	0.969052			62.084	1.93126			29.004	0.902233				50.077	1.14068			38.798	0.883759			25.507	0.58101				62.033	1.63577			33.103	0.872906			32.184	0.848672
			39.372	1.22475			86.461	2.68956			32.741	1.01848				40.542	0.923484			61.6	1.40315			23.788	0.541854				33.653	0.887409			23.621	0.622871			106.818	2.81673
			14.616	0.454663			68.72	2.13769			36.054	1.12154				58.379	1.32978			27.656	0.629961			22.091	0.503199				46.082	1.21515			28.689	0.756511			82.277	2.16959
			41.671	1.29627			62.32	1.9386			24.95	0.776125				45.2	1.02959			20.917	0.476457			29.414	0.670006				50.613	1.33463			30.634	0.8078			132.925	3.50515
			20.706	0.644106			79.371	2.46901			44.454	1.38284				34.739	0.791301			61.819	1.40814			22.515	0.512857				42.137	1.11113			72.615	1.91481			109.599	2.89006
			32.765	1.01923			64.07	1.99304			43.135	1.34181				47.736	1.08735			35.814	0.815788			21.002	0.478393				47.183	1.24419			37.907	0.999584			134.709	3.55219
			39.77	1.23713			65.047	2.02343			31.873	0.99148				38.078	0.867358			25.077	0.571215			21.87	0.498165				46.859	1.23564			97.725	2.57695			81.12	2.13908
			30.398	0.945597			49.056	1.526			45.793	1.42449				48.372	1.10184			23.701	0.539872			19.154	0.436299				51.77	1.36514			85.857	2.264			108.059	2.84945
			36.697	1.14154			106.997	3.32838			32.675	1.01643				46.533	1.05995			53.706	1.22334			25.429	0.579233				39.608	1.04444			51.752	1.36467			142.256	3.7512
			38.202	1.18836			90.315	2.80945			33.542	1.0434				52.394	1.19345			23.012	0.524178			20.659	0.47058				51.838	1.36694			66.27	1.7475			131.41	3.4652
			30.329	0.94345			72.248	2.24743			46.006	1.43112				45.132	1.02804			27.525	0.626977			21.163	0.482061				46.839	1.23512			61.389	1.61879			141.379	3.72808
			27.289	0.848885			58.587	1.82248			41.915	1.30386				40.056	0.912414			48.054	1.0946			43.488	0.99059				42.151	1.1115			71.007	1.87241			55.41	1.46113
			40.174	1.2497			72.922	2.2684			38.064	1.18406				39.693	0.904145			47.422	1.0802			34.053	0.775675				52.088	1.37353			28.573	0.753452			49.567	1.30705
			43.576	1.35553			89	2.76854			37.981	1.18148				31.328	0.713604			33.288	0.758249			97.481	2.22047				28.776	0.758805			75.924	2.00207			110.295	2.90841
			25.59	0.796033			77.199	2.40145			34.45	1.07164				58.139	1.32432			27.729	0.631624			74.773	1.70321				38.49	1.01496			33.862	0.89292			95.891	2.52859
			36.366	1.13124			49.708	1.54628			44.126	1.37264				42.479	0.967606			26.772	0.609825			30.056	0.684629				60.42	1.59324			45.793	1.20753			83.102	2.19135
			35.683	1.11			79.654	2.47781			51.582	1.60457				52.678	1.19992			43.395	0.988471			40.286	0.917653				44.403	1.17088			89.127	2.35022			145.978	3.84935
			33.14	1.03089			103.554	3.22128			32.099	0.99851				40.178	0.915193			22.904	0.521718			67.289	1.53274				54.54	1.43819			70.896	1.86948			61.325	1.6171
			53.545	1.66564			88.946	2.76686			32.554	1.01266				48.486	1.10444			25.3	0.576295			125.48	2.85824				59.505	1.56911			132.589	3.49629			121.02	3.19122
			34.311	1.06732			91.053	2.8324			38.716	1.20435				60.82	1.38539			27.886	0.6352			156.283	3.55989				50.76	1.33851			62.964	1.66032			64.327	1.69626
			41.688	1.2968			73.009	2.27111			44.142	1.37313				49.039	1.11703			26.557	0.604928			158.53	3.61107				47.142	1.24311			109.937	2.89897			91.98	2.42546
			34.325	1.06775			87.789	2.73087			46.935	1.46002				47.818	1.08922			20.702	0.47156			78.889	1.79697				40.441	1.0664			28.725	0.757461			131.352	3.46367
			31.81	0.98952			83.092	2.58476			39.416	1.22612				66.253	1.50914			16.872	0.384318			34.308	0.781483				32.048	0.845086			40.968	1.0803			82.817	2.18383
			23.531	0.731984			121.229	3.7711			42.079	1.30896				32.917	0.749799			20.706	0.471651			40.771	0.928701				52.655	1.38848			24.102	0.635555			128.597	3.39102
			24.624	0.765984			83.202	2.58818			45.403	1.41236				40.533	0.923279			28.929	0.658958			24.783	0.564519				58.508	1.54282			64.643	1.7046			71.216	1.87792
			36.2	1.12608			98.611	3.06751			49.801	1.54917				57.151	1.30181			26.057	0.593538			30.149	0.686748				56.475	1.48921			84.508	2.22842			61.352	1.61781
			21.358	0.664388			76.414	2.37703			36.084	1.12247				50.224	1.14403			23.774	0.541535			22.81	0.519577				53.676	1.4154			25.909	0.683204			133.695	3.52545
			38.148	1.18668			28.393	0.883227			54.608	1.6987				38.314	0.872734			22.031	0.501832			39.376	0.896925				41.629	1.09773			30.956	0.816291			34.139	0.900224
			33.21	1.03307			29.239	0.909544			44.458	1.38296				51.391	1.17061			29.099	0.66283			39.171	0.892255				49.787	1.31285			22.874	0.603173			30.52	0.804794
			36.668	1.14064			100.198	3.11688			41.76	1.29904				63.994	1.45768			22.596	0.514702			29.211	0.665382				50.578	1.33371			22.542	0.594419			60.537	1.59632
			34.93	1.08657			93.685	2.91428			43.234	1.34489				38.662	0.880661			20.983	0.47796			52.87	1.2043				53.307	1.40567			25.65	0.676375			121.711	3.20944
			37.989	1.18173			85.012	2.64449			36.206	1.12627				52.151	1.18792			21.695	0.494179			90.512	2.06172				48.154	1.26979			30.205	0.796487			94.155	2.48281
			39.946	1.24261			87.156	2.71118			54.395	1.69208				37.277	0.849113			19.277	0.4391			75.494	1.71964				59.537	1.56995			89.842	2.36908			135.208	3.56535
			39.47	1.2278			81.36	2.53088			38.84	1.2082				61.372	1.39796			20.495	0.466845			67.773	1.54376				55.208	1.4558			84.734	2.23438			103.371	2.72583
			22.769	0.70828			84.801	2.63792			36.69	1.14132				43.159	0.983096			25.387	0.578277			53.58	1.22047				45.505	1.19994			23.84	0.628646			114.547	3.02053
			25.746	0.800886			90.823	2.82525			44.9	1.39671				44.532	1.01437			20.638	0.470102			36.721	0.836448				54.545	1.43832			74.627	1.96787			94.195	2.48386
			37.707	1.17296			87.745	2.7295			30.927	0.962053				49.511	1.12778			42.935	0.977993			66.142	1.50661				44.384	1.17038			26.466	0.697892			103.525	2.72989
			39.893	1.24096			96.11	2.98971			33.463	1.04094				48.176	1.09738			33.939	0.773078			48.814	1.11191				56.271	1.48383			49.41	1.30291			34.343	0.905604
			24.34	0.757149			92.184	2.86759			56.968	1.77212				46.155	1.05134			95.682	2.17949			45.821	1.04373				61.114	1.61154			144.465	3.80945			69.696	1.83784
			24.234	0.753852			86.575	2.69311			32.137	0.999692				58.879	1.34117			74.081	1.68745			32.124	0.731735				42.435	1.11898			174.099	4.59088			114.929	3.03061
			53.391	1.66084			184.761	5.7474			51.35	1.59736				50.371	1.14737			29.679	0.676042			20.377	0.464157				62.751	1.65471			122.889	3.24051			36.239	0.9556
			40.073	1.24656			152.863	4.75514			52.976	1.64794				58.793	1.33921			39.887	0.908564			26.319	0.599506				42.405	1.11819			122.598	3.23283			163.29	4.30586
			16.093	0.500608			168.547	5.24303			41.744	1.29854				50.527	1.15093			66.918	1.52429			100.053	2.27905				29.212	0.770302			103.705	2.73464			75.075	1.97968
			29.107	0.905437			173.714	5.40376			40.541	1.26112				48.688	1.10904			122.678	2.79442			35.271	0.803419				40.076	1.05678			141.68	3.73601			119.372	3.14777
			36.731	1.1426			161.854	5.03483			49.538	1.54099				49.634	1.13059			152.053	3.46353			40.117	0.913803				31.666	0.835013			165.254	4.35765			105.377	2.77873
			29.346	0.912872			167.845	5.22119			34.762	1.08135				41.276	0.940204			137.438	3.13063			22.215	0.506023				49.451	1.30399			183.581	4.84092			76.163	2.00837
			46.705	1.45286			81.904	2.5478			24.925	0.775347				39.212	0.893189			77.274	1.76018			24.391	0.555589				42.993	1.1337			228.057	6.01372			161.363	4.25504
			38.882	1.20951			142.162	4.42226			41.573	1.29322				39.355	0.896446			33.946	0.773238			78.45	1.78697				50.35	1.3277			130.964	3.45344			25.778	0.67975
			39.427	1.22646			128.478	3.99659			40.192	1.25026				37.733	0.8595			40.61	0.925033			47.552	1.08316				62.53	1.64888			186.827	4.92651			62.567	1.64985
			32.591	1.01381			41.194	1.28143			70.49	2.19275				51.028	1.16234			24.512	0.558346			54.846	1.24931				46.619	1.22931			228.776	6.03268			67.006	1.76691
			37.034	1.15202			94.864	2.95095			44.516	1.38477				33.061	0.753079			31.56	0.718888			36.968	0.842074				62.512	1.6484			218.244	5.75496			143.71	3.78954
			25.09	0.78048			149.515	4.65099			34.481	1.07261				44.745	1.01922			29.675	0.675951			32.511	0.740551				34.781	0.917154			42.458	1.11959			28.651	0.755509
			36.001	1.11989			117.636	3.65933			38.096	1.18506				47.91	1.09132			22.678	0.51657			27.671	0.630303				49.871	1.31507			47.012	1.23968			39.495	1.04146
			37.913	1.17937			98.448	3.06244			36.846	1.14618				57.269	1.3045			27.627	0.629301			33.154	0.755197				62.661	1.65233			49.277	1.2994			157.497	4.1531
			37.546	1.16795			108.884	3.38708			43.672	1.35851				40.816	0.929726			39.175	0.892346			48.108	1.09583				44.696	1.17861			45.624	1.20308			72.575	1.91376
			42.701	1.32831			104.779	3.25938			62.872	1.95577				38.642	0.880205			38.683	0.881139			26.438	0.602217				53.371	1.40736			89.676	2.3647			139.732	3.68465
			34.881	1.08505			75.62	2.35233			38.76	1.20572				42.809	0.975123			29.119	0.663286			34.312	0.781575				43.962	1.15925			66.566	1.7553			105.04	2.76984
			38.822	1.20764			79.843	2.48369			40.204	1.25063				43.774	0.997104			52.566	1.19737			25.997	0.592172				43.178	1.13858			95.27	2.51221			47.018	1.23984
			38.345	1.19281			75.225	2.34004			48.188	1.49899				37.481	0.853759			88.002	2.00455			26.776	0.609916				56.595	1.49238			210.682	5.55555			59.235	1.56199
			27.396	0.852213			98.3	3.05784			50.931	1.58432				51.47	1.17241			66.409	1.51269			44.274	1.00849				50.584	1.33387			85.855	2.26394			74.803	1.97251
			9.47	0.294585			121.605	3.78279			38.986	1.21275				45.926	1.04612			73.825	1.68162			98.335	2.23992				48.713	1.28453			81.673	2.15367			33.073	0.872115
			36.815	1.14521			108.017	3.36011			42.982	1.33705				48.679	1.10883			53.797	1.22541			24.57	0.559667				63.57	1.6763			45.779	1.20716			67.118	1.76986
			50.391	1.56752			104.379	3.24694			30.544	0.950139				39.906	0.908997			32.803	0.747202			40.528	0.923165				44.437	1.17178			156.971	4.13923			60.341	1.59116
			51.407	1.59913			93.595	2.91148			53.603	1.66744				54.461	1.24054			36.222	0.825081			18.152	0.413475				52.195	1.37635			48.112	1.26868			88.179	2.32523
			53.047	1.65014			109.257	3.39868			42.808	1.33164				40.147	0.914487			65.368	1.48898			43.025	0.980043				53.188	1.40253			34.181	0.901332			81.697	2.1543
			52.088	1.62031			80.733	2.51138			44.62	1.388				60.436	1.37664			47.913	1.09138			35.373	0.805742				53.143	1.40135			45.392	1.19696			80.175	2.11417
			38.07	1.18425			60.225	1.87343			36.534	1.13647				36.744	0.836972			45.245	1.03061			19.306	0.439761				82.162	2.16656			58.103	1.53214			56.987	1.50271
			50.081	1.55788							48.717	1.51545				48.696	1.10922			20.391	0.464476			25.129	0.5724				45.738	1.20608			52.881	1.39444			36.325	0.957868
			57.855	1.79971			81.2184	2.52648			37.952	1.18058				42.62	0.970818			26.183	0.596408			24.33	0.5542				33.08	0.872299			58.982	1.55532			69.662	1.83694
			37.995	1.18192							42.987	1.33721				32.545	0.741325			97.861	2.22912			26.536	0.604449				53.951	1.42265			37.315	0.983974			15.866	0.418377
			43.425	1.35083							39.994	1.2441				47.792	1.08863			34.979	0.796768			29.006	0.660712				52.941	1.39602			68.819	1.81471			65.598	1.72978
			46.549	1.44801							39.011	1.21352				23.066	0.525408			39.728	0.904943			27.688	0.63069				49.468	1.30444			60.51	1.59561			66.354	1.74971
			35.005	1.08891							45.922	1.42851				58.69	1.33687			22.423	0.510761			25.376	0.578026				40.721	1.07379			50.374	1.32833			117.128	3.08859
			42.189	1.31238							48.024	1.49389				40.029	0.911799			24.735	0.563425			36.364	0.828316				40.94	1.07956			91.669	2.41726			134.229	3.53954
			63.826	1.98545							41.124	1.27925				75.423	1.71802			75.515	1.72012			100.633	2.29226				54.22	1.42975			57.131	1.50651			60.708	1.60083
			25.125	0.781569							36.087	1.12257				43.58	0.992685			23.047	0.524975			25.842	0.588641				77.913	2.05452			39.535	1.04251			68.224	1.79902
			34.598	1.07625							40.42	1.25735				57.235	1.30373			47.58	1.0838			78.991	1.79929				29.75	0.784489			51.221	1.35067			84.551	2.22956
			22.047	0.685821							44.684	1.38999				55.039	1.2537			54.378	1.23865			114.6	2.61041				32.946	0.868766			154.821	4.08253			69.022	1.82007
			43.157	1.34249							48.067	1.49523				51.589	1.17512			36.5	0.831414			98.539	2.24457				44.995	1.18649			166.547	4.39174			61.543	1.62285
			46.385	1.44291							56.654	1.76235				57.566	1.31126			28.029	0.638457			36.984	0.842439				50.278	1.3258			191.567	5.0515			71.918	1.89643
			52.444	1.63139							31.35	0.975211				48.553	1.10596			32.429	0.738683			131.323	2.99134				34.24	0.902888			51.407	1.35557			148.081	3.9048
			47.085	1.46468							43.911	1.36595				52.815	1.20304			33.082	0.753557			114.03	2.59743				47.446	1.25112			139.841	3.68752			132.426	3.49199
			40.175	1.24973							42.69	1.32797				40.2	0.915694			47.292	1.07724			25.562	0.582263				33.948	0.895188			129.661	3.41908			92.201	2.43128
			51.698	1.60818							41.164	1.2805				49.963	1.13808			25.634	0.583903			55.574	1.26589				40.928	1.07925			216.518	5.70945			86.115	2.2708
			42.241	1.314							61.737	1.92047				54.037	1.23088			28.258	0.643674			77.721	1.77036				49.069	1.29392			143.982	3.79672			117.25	3.09181
			45.674	1.42079							22.155	0.68918				37.589	0.85622			34.589	0.787884			121.389	2.76505				35.4	0.933476			116.805	3.08008			71.436	1.88372
			33.606	1.04539							46.424	1.44412				41.408	0.94321			25.69	0.585179			50.436	1.14885				36.934	0.973927			149.465	3.9413			100.652	2.65413
			53.087	1.65139							49.406	1.53688				53.258	1.21314			26.592	0.605725			119.014	2.71096				45.465	1.19888			99.967	2.63607			75.681	1.99566
			45.85	1.42627							52.967	1.64766				44.051	1.00341			43.896	0.999883			29.056	0.661851				30.086	0.793349			175.127	4.61799			78.033	2.05768
			52.533	1.63415							38.679	1.2032				52.849	1.20382			100.13	2.28081			101.563	2.31345				36.188	0.954255			143.572	3.78591			84.936	2.23971
			48.058	1.49495							42.716	1.32878				39.495	0.899635			24.346	0.554564			101.536	2.31283				58.969	1.55498			125.751	3.31598			112.301	2.96131
			39.586	1.23141							35.11	1.09217				51.021	1.16218			39.825	0.907152			85.638	1.9507				36.12	0.952462			104.89	2.76588			98.089	2.58655
			43.668	1.35839							42.445	1.32035				21.379	0.486981			18.172	0.41393			43.87	0.999291				29.472	0.777159			109.177	2.87893			76.982	2.02997
			53.039	1.6499							35.511	1.10465				40.692	0.926901			42.339	0.964417			34.47	0.785174				40.879	1.07795			102.942	2.71452			149.058	3.93057
			50.743	1.57847							40.355	1.25533				44.92	1.02321			34.515	0.786199			83.178	1.89467				61.806	1.62979			150.983	3.98133			86.458	2.27984
			56.717	1.76431							47.534	1.47865				54.323	1.23739			19.471	0.443519			65.123	1.4834				47.926	1.26378			134.832	3.55544			65.753	1.73387
			40.207	1.25073							40.796	1.26905				35.517	0.809023			17.899	0.407712			108.032	2.4608				36.625	0.965779			100.555	2.65157			65.967	1.73951
			43.497	1.35307							41.439	1.28905				41.993	0.956536			24.972	0.568824			27.198	0.619529				31.305	0.825494			60.576	1.59735			73.396	1.93541
			46.703	1.4528							32.596	1.01397				46.46	1.05829			24.373	0.555179			80.069	1.82385				42.292	1.11521			38.366	1.01169			35.725	0.942046
			53.69	1.67015							41.157	1.28028				49.575	1.12924			25.843	0.588664			25.835	0.588482				45.125	1.18992			44.764	1.1804			77.223	2.03632
			56.659	1.7625							31.201	0.970576				50.086	1.14088			97.804	2.22782			38.159	0.869203				58.134	1.53296			170.407	4.49353			95.788	2.52587
			54.864	1.70667							31.782	0.988649				46.881	1.06788			30.204	0.688001			56.802	1.29386				45.298	1.19448			195.125	5.14533			118.579	3.12686
			57.96	1.80297							42.619	1.32576				44.592	1.01574			24.46	0.557161			43.676	0.994872				49.492	1.30507			99.693	2.62884			86.517	2.2814
			49.704	1.54615							29.086	0.904784				57.475	1.30919			27.944	0.636521			21.304	0.485272				50.248	1.32501			47.783	1.26001			73.241	1.93132
			50.131	1.55944							43.521	1.35382				54.006	1.23017			25.44	0.579484			31.4	0.715244				51.432	1.35623			167.879	4.42687			51.008	1.34505
			45.021	1.40048							48.106	1.49644				63.586	1.44839			36.387	0.82884			67.908	1.54684				89.391	2.35719			132.71	3.49948			67.324	1.77529
			55	1.7109							55.192	1.71687				53.582	1.22052			99.655	2.26999			36.592	0.833509				55.637	1.46711			92.385	2.43614			88.208	2.32599
			45.749	1.42312							52.991	1.6484				31.513	0.717818			25.677	0.584883			23.536	0.536114				39.264	1.03537			152.408	4.01891			72.285	1.90611
			52.083	1.62016							46.712	1.45308				42.307	0.963688			78.352	1.78474			21.594	0.491878				54.429	1.43526			95.134	2.50863			20.21	0.532925
			46.817	1.45635							62.327	1.93882				48.77	1.11091			112.847	2.57048			98.703	2.2483				46.573	1.2281			173.096	4.56444			51.003	1.34492
			49.286	1.53315							60.154	1.87122				54.049	1.23115			96.631	2.20111			53.009	1.20746				59.631	1.57243			196.111	5.17133			47.515	1.25294
			35.997	1.11977							12.955	0.402994				49.371	1.1246			29.392	0.669505			111.161	2.53208				67.014	1.76712			221.419	5.83868			89.199	2.35212
			42.935	1.33559							33.129	1.03055				40.302	0.918018			93.051	2.11956			36.179	0.824102				43.379	1.14388			94.1	2.48136			114.624	3.02256
			39.936	1.2423							73.741	2.29388				36.737	0.836812			34.715	0.790754			20.031	0.456275				35.238	0.929204			116.165	3.0632			122.665	3.2346
			52.604	1.63636							54.74	1.70281				32.923	0.749935			128.052	2.91683			56.483	1.2866				50.9	1.3422			132.027	3.48147			76.169	2.00853
			29.943	0.931443							74.256	2.3099				51.604	1.17546			111.076	2.53014			97.565	2.22238				50.918	1.34268			135.54	3.57411			67.912	1.7908
			45.629	1.41939							59.102	1.8385				42.635	0.97116			25.777	0.58716			27.295	0.621738				46.889	1.23643			130.183	3.43285			76.691	2.02229
			45.619	1.41908							70.262	2.18565				48.127	1.09626			54.688	1.24571			37.195	0.847245				42.375	1.1174			98.339	2.59314			72.911	1.92262
			38.552	1.19925							28.95	0.900554				33.043	0.752669			75.971	1.7305			129.63	2.95277				47.993	1.26555			35.015	0.923324			65.525	1.72785
			48.485	1.50823							73.345	2.28156				36.852	0.839432			120.041	2.73435			42.046	0.957743				46.524	1.22681			38.384	1.01216			69.25	1.82608
			55.748	1.73416							39.407	1.22584				26.179	0.596317			49.906	1.13678			165.722	3.77489				68.334	1.80193			41.08	1.08325			76.289	2.01169
			36.411	1.13264							54.378	1.69155				30.14	0.686543			114.216	2.60166			26.621	0.606385				49.038	1.2931			105.162	2.77306			67.997	1.79304
			42.448	1.32044							58.757	1.82777				47.937	1.09193			29.084	0.662489			42.41	0.966035				26.082	0.687766			110.961	2.92597			101.843	2.68554
			38.905	1.21023							39.803	1.23816				46.501	1.05922			90.086	2.05202			77.484	1.76497				61.663	1.62602			59.914	1.5799			75.912	2.00175
			48.884	1.52064							39.428	1.22649				48.775	1.11102			100.155	2.28138			101.769	2.31814				59.396	1.56624			99.338	2.61948			61.943	1.6334
			36.792	1.1445							17.332	0.53915				40.646	0.925853			100.188	2.28213			37.343	0.850616				43.908	1.15783			57.723	1.52212			92.62	2.44233
			44.563	1.38623							45.518	1.41594				50.867	1.15867			84.455	1.92375			20.328	0.463041				45.566	1.20155			153.979	4.06033			97.699	2.57626
			26.544	0.82571							16.96	0.527578				49.201	1.12072			34.575	0.787565			28.914	0.658616				49.818	1.31367			112.149	2.9573			49.848	1.31446
			51.658	1.60694							41.22	1.28224				56.851	1.29498			43.667	0.994667			30.464	0.693923				44.395	1.17067			128.902	3.39907			105.128	2.77216
			27.911	0.868233							17.026	0.529631				45.743	1.04196			81.804	1.86337			25.029	0.570122				60.055	1.58361			36.052	0.950669			89.997	2.37317
			28.267	0.879307							30.785	0.957635				56.091	1.27767			64.933	1.47907			25.257	0.575316				35.262	0.929837			32.277	0.851125			95.098	2.50768
			28.039	0.872215							52.862	1.64439				51.771	1.17926			105.509	2.40333			25.182	0.573607				48.23	1.2718			116.512	3.07235			78.507	2.07018
			31.833	0.990236							30.87	0.960279				72.26	1.64597			27.009	0.615223			37.266	0.848862				45.23	1.19269			54.361	1.43347			83.357	2.19807
			5.759	0.179146							32.15	1.0001				47.052	1.07177			78.89	1.79699			96.803	2.20502				43.354	1.14322			122.074	3.21902			89.711	2.36562
			31.514	0.980313							33.202	1.03282				36.292	0.826676			25.898	0.589917			29.08	0.662398				51.858	1.36746			149.286	3.93658			115.149	3.03641
			26.872	0.835913							38.174	1.18749				50.052	1.14011			37.876	0.862757			24.542	0.559029				49.327	1.30072			150.787	3.97616			107.37	2.83128
			43.403	1.35015							24.116	0.750181				43.11	0.981979			55.824	1.27158			29.064	0.662033				64.739	1.70713			154.59	4.07644			60.14	1.58585
			40.791	1.26889							24.565	0.764149				36.251	0.825742			43.078	0.981251			28.096	0.639984				27.468	0.724314			38.497	1.01514			56.868	1.49957
			47.086	1.46471							20.314	0.631912				48.276	1.09965			21.041	0.479282			27.132	0.618025				39.849	1.05079			164.082	4.32674			90.42	2.38432
			51.147	1.59104							34.949	1.08717				48.363	1.10163			31.449	0.71636			37.948	0.864397				48.857	1.28833			134.09	3.53587			71.105	1.875
			34.758	1.08122							21.987	0.683954				43.652	0.994325			65.602	1.49431			100.723	2.29431				41.744	1.10076			140.422	3.70284			78.899	2.08052
			55.329	1.72113							43.234	1.34489				67.278	1.53249			36.335	0.827655			25.652	0.584313				39.725	1.04752			35.324	0.931472			74.932	1.97591
			31.226	0.971354							46.655	1.45131				42.908	0.977378			23.17	0.527777			79.569	1.81246				38.882	1.02529			93.691	2.47057			78.233	2.06296
			31.7	0.986098							49.083	1.52684				77.836	1.77298			21.304	0.485272			112.25	2.55688				31.207	0.822909			112.802	2.97452			60.412	1.59303
			39.671	1.23405							39.123	1.21701				35.089	0.799273			96.886	2.20691			96.029	2.18739				30.197	0.796276			112.93	2.97789			66.793	1.76129
			28.82	0.89651							43.022	1.33829				39.513	0.900045			52.408	1.19377			35.228	0.80244				41.204	1.08652			114.149	3.01004			108.373	2.85773
			40.677	1.26535							35.359	1.09992				39.952	0.910045			108.927	2.48119			97.042	2.21047				35.507	0.936298			106.862	2.81789			57.184	1.50791
			37.93	1.1799							34.582	1.07575				17.109	0.389717			35.651	0.812075			37.214	0.847678				40.015	1.05517			156.611	4.12974			52.636	1.38798
			28.642	0.890973							48.978	1.52357				40.378	0.919749			19.781	0.450581			127.441	2.90291				45.627	1.20316			98.08	2.58631			96.017	2.53191
			38.392	1.19427							102.458	3.18718				40.93	0.932322			56.075	1.2773			108.432	2.46991				44.758	1.18024			114.983	3.03203			60.926	1.60658
			36.26	1.12795							62.103	1.93185				40.491	0.922323			95.879	2.18398			26.649	0.607023				32.457	0.855871			43.35	1.14311			86.916	2.29192
			28.535	0.887644							41.072	1.27764				31.161	0.7098			27.268	0.621123			53.037	1.2081				31.555	0.832086			64.833	1.70961			69.525	1.83333
			44.103	1.37192							49.044	1.52562				40.63	0.925489			36.375	0.828567			76.613	1.74513				31.803	0.838626			107.646	2.83856			64.413	1.69853
			34.556	1.07494							52.505	1.63328				40.677	0.926559			41.833	0.952891			115.661	2.63458				25.185	0.664113			120.098	3.16691			46.137	1.2166
			39.046	1.21461							74.694	2.32352				38.421	0.875171			128.549	2.92815			50.257	1.14478				35.406	0.933634			58.445	1.54116			42.82	1.12914
			34.097	1.06066							65.827	2.04769				36.633	0.834443			163.371	3.72134			116.603	2.65604				35.259	0.929758			146.82	3.87155			56.657	1.49401
			46.529	1.44739							48.991	1.52397				35.55	0.809774			26.446	0.602399			29.499	0.671942				38.089	1.00438			126.235	3.32874			34.514	0.910113
			22.363	0.69565							62.218	1.93543				36.613	0.833988			75.648	1.72314			87.574	1.9948				34.359	0.906026			140.052	3.69309			34.135	0.900119
			34.463	1.07205							68.577	2.13324				38.498	0.876925			42.223	0.961775			102.644	2.33807				32.035	0.844743			164.779	4.34512			85.983	2.26732
			24.68	0.767726							21.131	0.657326				37.136	0.845901			99.565	2.26794			101.457	2.31103				34.749	0.91631			102.464	2.70191			72.341	1.90759
			33.744	1.04968							66.423	2.06623				39.112	0.890911			36.701	0.835992			84.912	1.93416				43.415	1.14483			133.916	3.53128			66.245	1.74684
			34.104	1.06088							47.576	1.47996				91.359	2.08102			20.431	0.465387			35.579	0.810435				28.22	0.744144			147.203	3.88165			60.281	1.58957
			40.757	1.26784							42.018	1.30706				31.632	0.720528			28.686	0.653423			41.134	0.936969				48.002	1.26578			112.579	2.96864			49.71	1.31082
			27.213	0.84652							69.007	2.14661				41.172	0.937835			30.169	0.687203			79.74	1.81635				47.683	1.25737			90.9	2.39698			32.781	0.864415
			26.912	0.837157							56.056	1.74375				27.198	0.619529			24.778	0.564405			102.921	2.34438				27.897	0.735627			44.731	1.17953			32.547	0.858244
			40.628	1.26382							42.045	1.3079				44.171	1.00615			25.08	0.571284			63.475	1.44586				31.859	0.840102			33.517	0.883823			61.018	1.60901
			38.797	1.20687							39.364	1.2245				35.008	0.797428			18.254	0.415798			27.38	0.623674				33.806	0.891443			90.41	2.38406			57.729	1.52228
			32.75	1.01876							53.516	1.66473				47.776	1.08826			24.807	0.565065			78.389	1.78558				27.852	0.73444			70.003	1.84594			48.297	1.27356
			28.356	0.882076							43.047	1.33907				61.982	1.41185			36.796	0.838156			26.937	0.613583				35.223	0.928809			34.289	0.90418			65.305	1.72205
			38.475	1.19685							51.2	1.59269				47.919	1.09152			94.263	2.14717			58.166	1.32493				29.631	0.781351			34.573	0.911669			49.605	1.30805
			34.249	1.06539							41.946	1.30482				49.966	1.13815			85.169	1.94002			21.497	0.489669				46.854	1.23551			44.402	1.17085			78.392	2.06715
			32.228	1.00252							39.625	1.23262				24.436	0.556614			29.697	0.676452			31.381	0.714811				39.203	1.03376			69.157	1.82363			31.396	0.827893
			35.842	1.11494							39.995	1.24413				39.803	0.906651			25.183	0.57363			65.491	1.49178				23.289	0.614117			39.842	1.05061			35.94	0.947716
			29.719	0.924475							58.154	1.80901				29.119	0.663286			29.221	0.665609			21.364	0.486639				46.697	1.23137			145.555	3.8382			42.825	1.12927
			32.123	0.999257							46.249	1.43868				98.154	2.2358			28.09	0.639847			21.551	0.490899				26.929	0.710101			49.072	1.294			72.09	1.90097
			25.587	0.79594							50.762	1.57906				49.799	1.13434			26.935	0.613538			98.136	2.23539				39.149	1.03234			98.166	2.58858			104.678	2.76029
			43.782	1.36194							52.224	1.62454				40.033	0.91189			38.154	0.869089			52.295	1.1912				29.902	0.788497			53.478	1.41018			53.862	1.42031
			28.596	0.889542							22.194	0.690393				44.828	1.02111			30.518	0.695153			111.365	2.53672				49.132	1.29558			51.447	1.35663			59.782	1.57641
			29.746	0.925315							28.702	0.892839				45.028	1.02567			98.363	2.24056			20.502	0.467004				42.59	1.12307			10.751	0.283497			43.326	1.14248
			36.399	1.13227							51.757	1.61002				59.519	1.35575			25.813	0.58798			54.072	1.23168				38.1	1.00467			26.397	0.696073			32.846	0.866129
			28.143	0.87545							27.229	0.847018				34.22	0.779479			109.71	2.49902			94.657	2.15614				34.801	0.917681			35.858	0.945553			69.605	1.83544
			32.556	1.01273							44.81	1.39391				43.557	0.992161			77.117	1.75661			26.736	0.609005				33.19	0.8752			133.204	3.51251			54.125	1.42724
			25.375	0.789345							51.198	1.59263				28.602	0.65151			94.437	2.15113			42.115	0.959315				35.535	0.937036			45.149	1.19055			37.152	0.979675
			30.126	0.937136							48.78	1.51741				68.691	1.56468			34.98	0.796791			131.482	2.99496				48.75	1.28551			66.949	1.7654			75.265	1.98469
			25.853	0.804215							35.417	1.10172				52.429	1.19425			29.724	0.677067			166.515	3.79296				54.533	1.438			41.825	1.1029			72.361	1.90812
			34.276	1.06623							49.692	1.54578				38.737	0.882369			94.894	2.16154			26.389	0.601101				26.878	0.708756			54.229	1.42999			41.823	1.10285
			40.791	1.26889							15.544	0.48353				31.538	0.718387			36.654	0.834922			77.248	1.75959				41.898	1.10482			97.314	2.56611			41.555	1.09578
			27.697	0.861576							51.775	1.61058				46.487	1.0589			124.879	2.84455			42.942	0.978153				52.235	1.3774			85.498	2.25453			67.231	1.77284
			38.128	1.18606							47.95	1.49159				57.824	1.31714			105.934	2.41301			103.143	2.34944				57.289	1.51068			69.702	1.838			72.992	1.92475
			27.49	0.855137												31.207	0.710847			26.506	0.603766			26.599	0.605884				52.547	1.38563			39.773	1.04879			58.734	1.54878
			34.418	1.07065							46.4389	1.44458				33.657	0.766655			52.209	1.18924			40.239	0.916582				39.996	1.05467			77.375	2.04033			52.326	1.3798
			44.917	1.39724												56.641	1.29019			75.15	1.7118			19.871	0.452631				46.097	1.21555			62.516	1.64851			49.116	1.29516
			34.905	1.0858												52.586	1.19783			113.494	2.58522			54.723	1.24651				44.925	1.18464			30.507	0.804451			47.182	1.24416
			41.431	1.2888												42.86	0.976285			49.558	1.12885			28.133	0.640826				43.961	1.15922			94.02	2.47925			45.851	1.20906
			37.478	1.16584												37.61	0.856698			113.177	2.578			28.428	0.647546				45.476	1.19917			70.515	1.85944			77.573	2.04555
			36.84	1.14599												60.84	1.38584			29.571	0.673582			41.443	0.944008				49.003	1.29218			40.359	1.06424			72.589	1.91413
			33.553	1.04374												49.509	1.12774			85.782	1.95398			27.167	0.618822				45.191	1.19166			40.179	1.0595			57.232	1.50917
			40.655	1.26466												39.594	0.90189			101.733	2.31732			38.033	0.866333				29.509	0.778134			45.052	1.18799			57.625	1.51954
			32.578	1.01341												38.537	0.877814			99.078	2.25684			76.671	1.74645				50.047	1.31971			145.358	3.833			45.684	1.20466
			29.862	0.928923												38.501	0.876994			83.078	1.89239			52.475	1.1953				60.229	1.5882			161.155	4.24956			76.962	2.02944
			29.71	0.924195												54.937	1.25138			35.356	0.805355			32.804	0.747225				24.761	0.652932			29.345	0.77381			85.875	2.26447
			32.543	1.01232												28.624	0.652011			40.776	0.928815			90.176	2.05407				42.821	1.12916			101.604	2.67924			43.664	1.15139
			49.752	1.54765												39.885	0.908519			78.334	1.78433			30.839	0.702465				33.926	0.894608			132.005	3.48089			46.152	1.217
			37.57	1.1687												49.376	1.12471			101.628	2.31493			36.533	0.832165				23.364	0.616094			71.107	1.87505			55.83	1.4722
			42.321	1.31649												39.951	0.910022			62.769	1.42978			22.836	0.520169				32.778	0.864336			85.273	2.2486			39.585	1.04383
			35.991	1.11958												44.335	1.00988			27.196	0.619483			20.648	0.47033				48.14	1.26942			73.63	1.94158			50.934	1.3431
			38.188	1.18792												56.404	1.2848			77.375	1.76248			27.938	0.636385				26.851	0.708044			76.443	2.01575			75.503	1.99097
			41.285	1.28426												43.986	1.00193			26.789	0.610212			80.794	1.84036				50.605	1.33442			111.647	2.94406			76.709	2.02277
			47.424	1.47523												45.741	1.04191			57.737	1.31516			88.644	2.01917				35.662	0.940385			37.311	0.983868			49.748	1.31182
			42.687	1.32787												58.863	1.34081			21.39	0.487231			29.473	0.67135				51.276	1.35212			69.103	1.8222			82.408	2.17305
			48.806	1.51822												36.399	0.829113			31.263	0.712123			25.806	0.587821				40.644	1.07176			112.338	2.96228			60.192	1.58723
			40.799	1.26914												54.367	1.2384			63.713	1.45128			41.114	0.936514				54.381	1.43399			85.549	2.25587			65.537	1.72817
			24.444	0.760385												37.61	0.856698			21.243	0.483883			61.062	1.3909				40.687	1.07289			131.184	3.45924			50.839	1.34059
			42.039	1.30772												48.405	1.10259			21.918	0.499258			87.978	2.004				53.301	1.40551			94.993	2.50491			57.301	1.51099
			43.038	1.33879												59.325	1.35133			96.441	2.19678			121.037	2.75704				43.764	1.15403			44.412	1.17112			64.882	1.7109
			49.531	1.54077												50.538	1.15118			51.502	1.17314			67.702	1.54215				53.108	1.40043			96.463	2.54367			93.863	2.47511
			38.766	1.2059												35.927	0.818362			108.243	2.46561			42.231	0.961957				34.519	0.910245			104.741	2.76196			52.979	1.39702
			22.514	0.700348												60.265	1.37274			20.307	0.462562			33.997	0.774399				47.374	1.24922			93.654	2.4696			44.849	1.18264
			43.067	1.33969												41.588	0.947311			53.584	1.22056			71.358	1.62543				45.642	1.20355			88.541	2.33477			58.78	1.54999
			48.951	1.52273												43.002	0.979519			94.181	2.1453			111.232	2.53369				52.596	1.38692			98.818	2.60577			60.562	1.59698
			48.5	1.5087												48.213	1.09822			26.845	0.611488			79.857	1.81902				46.441	1.22462			99.441	2.6222			52.652	1.3884
			58.421	1.81731												45.535	1.03722			41.955	0.95567			36.594	0.833555				46.247	1.2195			24.501	0.646076			54.199	1.42919
			42.511	1.3224												45.368	1.03341			128.966	2.93765			70.829	1.61338				53.128	1.40095			83.408	2.19942			93.682	2.47034
			49.57	1.54198												59.604	1.35769			165.125	3.76129			19.678	0.448235				33.008	0.870401			94.468	2.49106			64.269	1.69473
			43.577	1.35556												46.652	1.06266			26.39	0.601124			42.214	0.96157				37.793	0.996578			48.361	1.27525			67.782	1.78737
			41.838	1.30146												54.691	1.24578			75.233	1.71369			22.579	0.514315				50.165	1.32282			45.509	1.20004			55.089	1.45266
			36.636	1.13964												47.673	1.08592			101.16	2.30427			104.002	2.36901				52.765	1.39138			29.457	0.776763			80.502	2.12279
			26.384	0.820733												46.896	1.06822			42.544	0.969087			52.013	1.18478				43.38	1.1439			49.548	1.30655			81.852	2.15839
			22.198	0.690518												44.915	1.02309			26.307	0.599233			26.789	0.610212				46.89	1.23646			78.082	2.05897			81.112	2.13887
			30.486	0.948334												39.047	0.889431			39.8	0.906583			28.397	0.64684				40.617	1.07105			51.562	1.35966			67.434	1.77819
			28.234	0.878281												46.152	1.05127			20.355	0.463656			27.365	0.623333				46.287	1.22056			25.293	0.666961			81.388	2.14615
			31.176	0.969798												36.957	0.841824			53.944	1.22876			21.622	0.492516				39.342	1.03742			72.716	1.91748			48.652	1.28292
			29.264	0.910321												38.682	0.881116			27.992	0.637615			21.542	0.490694				40.757	1.07474			26.295	0.693383			67.453	1.77869
			25.511	0.793576												36.195	0.824466			28.33	0.645314			45.131	1.02801				50.804	1.33967			65.446	1.72577			79.475	2.09571
			33.661	1.0471												47.037	1.07143			41.207	0.938632			123.052	2.80294				61.391	1.61884			57.809	1.52439			66.217	1.7461
			32.151	1.00013												31.3	0.712966			27.167	0.618822			28.294	0.644494				38.734	1.02139			51.674	1.36261			59.083	1.55798
			29.644	0.922142												41.303	0.940819			37.453	0.853122			25.696	0.585315				38.095	1.00454			123.836	3.26548			85.227	2.24738
			49.517	1.54034												45.59	1.03847			75.321	1.7157			28.232	0.643081				50.244	1.3249			109.921	2.89855			78.45	2.06868
			50.237	1.56273												52.393	1.19343			32.954	0.750641			102.59	2.33684				66.227	1.74637			114.317	3.01447			82.687	2.18041
			39.179	1.21875												37.816	0.86139			51.219	1.16669			28.392	0.646726				62.041	1.63598			100.435	2.64841			82.046	2.1635
			39.534	1.22979												35.715	0.813533			88.877	2.02448			60.651	1.38154				50.104	1.32121			108.306	2.85596			89.478	2.35948
			43.958	1.36741												39.039	0.889248			30.377	0.691941			27.584	0.628321				47.619	1.25568			34.352	0.905841			86.294	2.27552
			38.988	1.21281												40.06	0.912505			23.102	0.526228			28.853	0.657227				41.334	1.08995			127.325	3.35748			62.159	1.63909
			32.02	0.996053												48.321	1.10068			36.355	0.828111			52.456	1.19487				45.025	1.18728			138.936	3.66366			67.397	1.77722
			28.848	0.897381												39.785	0.906241			20.239	0.461013			26.917	0.613128				44.873	1.18327			48.113	1.26871			92.188	2.43094
			27.046	0.841326												44.058	1.00357			27.633	0.629437			38.969	0.887654				33.983	0.896111			38.685	1.0201			64.278	1.69497
			24.269	0.754941												37.37	0.851231			79.051	1.80066			30.006	0.68349				43.549	1.14836			26.763	0.705724			93.701	2.47084
			27.518	0.856008												50.064	1.14038			29.661	0.675632			72.216	1.64497				43.236	1.14011			81.701	2.15441			68.771	1.81345
			27.468	0.854453												38.819	0.884237			86.711	1.97514			24.575	0.559781				42.337	1.1164			96.088	2.53378			107.29	2.82917
			27.585	0.858092												34.86	0.794057			25.839	0.588573			18.131	0.412996				50.459	1.33057			45.74	1.20614			64.721	1.70665
			34.18	1.06324												45.688	1.0407			40.961	0.933029			26.285	0.598732				47.203	1.24471			134.098	3.53608			69.47	1.83188
			36.639	1.13974												45.749	1.04209			60.367	1.37507			21.973	0.500511				43.898	1.15756			80.392	2.11989			81.055	2.13737
			36.825	1.14552												54.953	1.25174			84.628	1.9277			23.74	0.540761				44.542	1.17455			32.041	0.844901			71.85	1.89464
			36.993	1.15075												22.583	0.514406			86.659	1.97396			33.132	0.754696				32.729	0.863044			100.208	2.64242			68.246	1.79961
			44.811	1.39395												38.546	0.878019			118.177	2.69189			32.651	0.74374				44.536	1.17439			103.23	2.72211			104.331	2.75114
			19.228	0.598129												71.601	1.63096			64.877	1.4778			27.339	0.62274				39.103	1.03112			91.008	2.39983			92.464	2.43822
			35.874	1.11594												39.468	0.89902			33.571	0.764696			50.384	1.14767				48.263	1.27267			31.765	0.837624			97.535	2.57194
			38.449	1.19604												42.754	0.97387			42.098	0.958928			26.173	0.596181				49.595	1.30779			30.776	0.811544			108.515	2.86147
			24.114	0.750119												32.937	0.750254			70.652	1.60934			22.936	0.522447				33.845	0.892472			70.432	1.85725			128.366	3.38493
			32.79	1.02001												17.498	0.398578			35.925	0.818316			27.286	0.621533				45.085	1.18886			44.751	1.18006			87.566	2.30906
			40.143	1.24874												42.008	0.956878			68.647	1.56367			53.414	1.21669				44.341	1.16924			63.315	1.66958			77.436	2.04194
			43.562	1.35509												28.858	0.657341			19.773	0.450398			30.21	0.688137				39.313	1.03666			58.031	1.53024			121.966	3.21617
			34.508	1.07345												30.059	0.684698			41.347	0.941821			76.364	1.73945				44.828	1.18209			89.905	2.37074			133.167	3.51153
			44.915	1.39718												41.325	0.94132			22.375	0.509668			21.441	0.488393				50.071	1.32034			65.256	1.72076			87.824	2.31586
			22.186	0.690144												44.157	1.00583			102.034	2.32418			30.291	0.689982				42.382	1.11759			45.556	1.20128			96.509	2.54488
			39.358	1.22432												38.694	0.88139			50.369	1.14733			81.169	1.8489				44.972	1.18588			62.519	1.64859			127.827	3.37072
			28.557	0.888328												39.565	0.90123			26.609	0.606112			32.319	0.736177				66.746	1.76005			44.427	1.17151			90.361	2.38276
			22.518	0.700472												47.492	1.08179			28.159	0.641419			27.35	0.622991				56.766	1.49688			52.685	1.38927			119.22	3.14376
			30.987	0.963919												61.573	1.40254			27.165	0.618777			20.327	0.463018				42.501	1.12073			22.117	0.583212			76.941	2.02889
			25.165	0.782813												41.694	0.949725			21.874	0.498256			19.206	0.437483				47.122	1.24258			93.155	2.45644			102.907	2.71359
			22.222	0.691264												46.869	1.0676			21.237	0.483746			61.819	1.40814				37.891	0.999162			77.019	2.03094			105.204	2.77416
			24.655	0.766948												27.113	0.617592			45.151	1.02847			22.129	0.504065				39.344	1.03748			100.281	2.64435			109.273	2.88146
			34.612	1.07668												53.589	1.22067			120.461	2.74392			28.345	0.645655				34.338	0.905472			63.912	1.68532			78.737	2.07625
			35.556	1.10605												39.717	0.904692			28.112	0.640348			23.174	0.527868				44.778	1.18077			83.94	2.21345			88.101	2.32317
			36.454	1.13398												47.89	1.09086			27.861	0.634631			23.416	0.53338				31.264	0.824412			53.339	1.40652			78.862	2.07954
			28.966	0.901051												29.525	0.672534			25.752	0.586591			73.095	1.66499				52.913	1.39528			43.03	1.13467			130.555	3.44266
			35.117	1.09239												35.387	0.806061			100.901	2.29837			24.232	0.551968				51.246	1.35133			28.221	0.74417			98.583	2.59957
			41.247	1.28308												49.5	1.12753			28.4	0.646908			58.58	1.33436				58.795	1.55039			71.618	1.88852			113.447	2.99153
			26.375	0.820453												47.648	1.08535			59.34	1.35167			149.072	3.39563				46.412	1.22386			57.224	1.50896			102.873	2.7127
			29.712	0.924257												22.947	0.522697			27.632	0.629414			46.41	1.05715				43.677	1.15174			25.1	0.661872			81.98	2.16176
			34.133	1.06178												50.599	1.15257			51.616	1.17573			47.703	1.0866				45.773	1.20701			65.561	1.7288			105.374	2.77865
			23.042	0.716772												43.444	0.989587			28.676	0.653195			52.251	1.1902				38.986	1.02804			28.837	0.760414			66.633	1.75707
			41.711	1.29751												47.204	1.07523			26.848	0.611556			30.764	0.700757				53.074	1.39953			32.469	0.856188			109.843	2.89649
			8.478	0.263727												52.591	1.19794			38.387	0.874397			84.544	1.92578				51.247	1.35135			27.028	0.712712			136.12	3.5894
			22.173	0.68974												42.826	0.97551			29.763	0.677955			114.772	2.61433				34.161	0.900805			39.015	1.0288			73.336	1.93383
			20.056	0.623886												38.608	0.879431			70.525	1.60645			88.482	2.01548				46.268	1.22006			21.823	0.575459			78.798	2.07785
			38.22	1.18892												38.913	0.886378			24.575	0.559781			37.185	0.847017				50.143	1.32224			56.94	1.50147			98.581	2.59952
			19.492	0.606342												48.528	1.10539			18.211	0.414819			128.211	2.92045				53.697	1.41596			72.164	1.90292			101.129	2.66671
			38.399	1.19449												37.22	0.847814			26.238	0.597661			30.414	0.692784				35.53	0.936904			32.337	0.852707			117.651	3.10238
			38.218	1.18886												28.322	0.645132			22.158	0.504725			27.192	0.619392				48.709	1.28443			65.367	1.72369			76.007	2.00426
			33.726	1.04912												40.953	0.932846			32.641	0.743512			18.644	0.424682				47.818	1.26093			94.944	2.50361			99.271	2.61772
			29.748	0.925377												38.429	0.875353			23.937	0.545248			24.781	0.564473				37.342	0.984686			63.371	1.67105			149.295	3.93682
			24.745	0.769748												48.587	1.10674			33.592	0.765174			26.334	0.599848				52.651	1.38837			49.748	1.31182			91.992	2.42577
			47.72	1.48444												56.477	1.28646			27.3	0.621852			24.563	0.559507				54.571	1.439			17.684	0.466316			53.974	1.42326
			12.614	0.392386												42.9	0.977196			51.018	1.16211			24.468	0.557343				36.084	0.951513			91.241	2.40597			122.235	3.22326
			41.832	1.30128												40.782	0.928951			22.327	0.508575			30.949	0.704971				48.443	1.27741			51.521	1.35858			128.257	3.38206
			11.379	0.353969												48.178	1.09742			25.713	0.585703			18.443	0.420103				43.104	1.13663			79.298	2.09104			104.106	2.74521
			39.511	1.22908												36.526	0.832006			27.093	0.617137			21.722	0.494794				50.351	1.32772			94.943	2.50359			53.282	1.40501
			45.033	1.40085												34.842	0.793647			52.384	1.19323			20.786	0.473473				46.112	1.21595			39.207	1.03386			114.01	3.00637
			40.492	1.25959												27.834	0.634016			29.394	0.66955			19.431	0.442608				44.687	1.17837			58.632	1.54609			124.01	3.27007
			39.694	1.23477												50.169	1.14277			74.537	1.69784			23.317	0.531125				40.413	1.06567			67.355	1.77611			99.881	2.6338
			27.278	0.848542												35.606	0.81105			21.225	0.483473			23.653	0.538779				46.754	1.23287			31.575	0.832613			41.753	1.101
			48.788	1.51766												35.854	0.816699			29.881	0.680643			23.066	0.525408				58.426	1.54066			26.456	0.697628			102.937	2.71439
			15.828	0.492365												33.052	0.752874			80.746	1.83927			26.186	0.596477				35.671	0.940622			45.349	1.19583			120.039	3.16535
			28.133	0.875139												46.471	1.05854			32.45	0.739161			23.735	0.540647				33.165	0.874541			31.554	0.83206			142.619	3.76078
			32.62	1.01472												44.782	1.02007			27.063	0.616453			27.251	0.620736				41.331	1.08987			22.774	0.600536			145.564	3.83843
			34.176	1.06312												25.603	0.583197			20.066	0.457073			25.889	0.589712				42.321	1.11598			69.936	1.84417			54.153	1.42798
			42.979	1.33696												24.318	0.553927			59.928	1.36507			22.187	0.505386				34.721	0.915571			58.376	1.53934			97.447	2.56962
			41.733	1.2982												35.059	0.79859			19.203	0.437415			19.373	0.441287				33.239	0.876492			65.96	1.73932			116.555	3.07348
			23.777	0.739636												50.17	1.1428			22.335	0.508757			26.729	0.608845				33.567	0.885141			61.472	1.62098			66.031	1.7412
			31.868	0.991324												46.247	1.05344			28.462	0.648321			33.743	0.768614				18.777	0.495138			39.953	1.05354			76.995	2.03031
			38.047	1.18354												22.572	0.514155			23.37	0.532333			28.475	0.648617				34.296	0.904364			21.179	0.558477			88.678	2.33838
			46.041	1.43221												40.057	0.912437			23.508	0.535476			22.879	0.521148				43.349	1.14309			31.59	0.833009			105.551	2.78332
			39.538	1.22992												32.138	0.732054			70.49	1.60565			33.176	0.755698				38.066	1.00378			128.593	3.39092			58.049	1.53072
			39.545	1.23013												27.365	0.623333			24.065	0.548164			24.617	0.560737				25.145	0.663058			45.307	1.19472			73.457	1.93702
			28.943	0.900336												28.348	0.645724			59.696	1.35978			40.845	0.930386				32.543	0.858139			101.099	2.66592			85.709	2.26009
			26.796	0.833549												32.105	0.731302			9.2	0.209562			31.913	0.726929				30.39	0.801366			23.623	0.622924			95.263	2.51203
			44.857	1.39538												51.795	1.17981			57.991	1.32095			41.151	0.937356				21.213	0.559374			72.813	1.92003			61.802	1.62968
			43.645	1.35767												44.608	1.0161			145.706	3.31896			31.941	0.727567				31.173	0.822013			46.666	1.23055			81.378	2.14589
			42.805	1.33154												47.943	1.09207			45.943	1.04651			34.984	0.796882				25.749	0.678985			86.389	2.27802			80.621	2.12593
			40.003	1.24438												41.269	0.940044			47.09	1.07264			26.381	0.600919				18.659	0.492026			109.309	2.88241			93.652	2.46955
			30.285	0.942082												60.626	1.38097			51.792	1.17974			60.879	1.38673				31.011	0.817741			65.777	1.7345			105.176	2.77343
			42.915	1.33497												17.178	0.391288			30.797	0.701508			32.359	0.737088				24.8	0.653961			84.709	2.23372			83.932	2.21324
			21.608	0.672165												46.452	1.05811			83.021	1.89109			35.582	0.810503				28.588	0.753848			41.789	1.10195			109.551	2.88879
			37.094	1.15389												30.185	0.687568			112.505	2.56269			35.71	0.813419				50.434	1.32991			32.776	0.864283			73.36	1.93446
			45.131	1.4039												55.762	1.27017			87.05	1.98286			32.555	0.741553				38.909	1.02601			130.307	3.43612			120.682	3.18231
			40.191	1.25023												53.381	1.21594			37.407	0.852074			37.981	0.865149				32.312	0.852048			52.152	1.37522			114.528	3.02003
			33.973	1.05681												44.496	1.01355			128.147	2.91899			39.527	0.900364				34.928	0.92103			84.688	2.23317			157.817	4.16154
			44.195	1.37478												31.017	0.70652			30.645	0.698046			37.54	0.855103				24.058	0.634395			82.295	2.17007			54.84	1.4461
			45.258	1.40785												60.712	1.38293			27.067	0.616545			36.701	0.835992				30.48	0.803739			45.15	1.19058			155.761	4.10732
			25.948	0.80717												38.912	0.886355			18.614	0.423998			24.835	0.565703				31.396	0.827893			119.077	3.13999			122.522	3.23083
			26.606	0.827638												56.601	1.28928			24.677	0.562104			27.857	0.63454				32.229	0.849859			21.257	0.560534			85.39	2.25168
			55.013	1.7113												50.985	1.16136			26.24	0.597707			34.273	0.780686				36.271	0.956444			44.689	1.17842			54.496	1.43703
			47.239	1.46947												36.249	0.825696			24.723	0.563152			28.815	0.656361				29.28	0.772096			105.701	2.78727			129.331	3.41038
			58.928	1.83309												45.619	1.03913			23.911	0.544656			34.737	0.791255				35.984	0.948876			81.686	2.15401			90.906	2.39714
			41.897	1.3033												50.822	1.15765			30.803	0.701645			75.26	1.71431				43.248	1.14042			32.125	0.847117			105.785	2.78949
			22.899	0.712324												63.897	1.45548			18.201	0.414591			52.901	1.205				57.821	1.5247			69.161	1.82373			154.304	4.0689
			31.873	0.99148												51.764	1.1791			22.302	0.508005			27.983	0.63741				42.068	1.10931			59.616	1.57204			64.725	1.70676
			48.821	1.51868												37.191	0.847154			24.579	0.559872			35.46	0.807724				30.91	0.815078			99.116	2.61363			101.049	2.6646
			47.116	1.46565												37.565	0.855673			20.895	0.475956			77.284	1.76041				37.804	0.996868			25.059	0.66079			96.194	2.53658
			44.884	1.39622												57.8	1.3166			19.541	0.445114			54.021	1.23052				46.224	1.2189			63.384	1.6714			55.242	1.4567
			27.033	0.840921												41.992	0.956513			23.333	0.53149			35.392	0.806175				29.227	0.770698			26.393	0.695967			70.183	1.85068
			41.193	1.2814												48.838	1.11245			23.25	0.529599			73.341	1.6706				28.567	0.753294			35.618	0.939225			117.764	3.10536
			25.991	0.808507												47.318	1.07783			23.242	0.529417			30.73	0.699982				31.909	0.841421			90.564	2.38812			108.213	2.85351
			41.947	1.30485												42.285	0.963187			26.087	0.594222			52.167	1.18828				37.882	0.998925			23.582	0.621843			99.1	2.61321
			49.074	1.52656												52.067	1.18601			25.685	0.585065			30.978	0.705631				33.227	0.876176			112.689	2.97154			143.761	3.79089
			48.889	1.5208												39.394	0.897335			23.701	0.539872			36.533	0.832165				41.371	1.09093			94.563	2.49357			100.263	2.64387
			35.079	1.09121												55.614	1.2668			27.082	0.616886			34.796	0.792599				36.734	0.968653			21.104	0.5565			113.307	2.98784
			34.426	1.0709												54.356	1.23815			23.58	0.537116			22.788	0.519076				48.462	1.27791			52.325	1.37978			145.668	3.84118
			45.333	1.41018												46.336	1.05546			21.94	0.499759			58.79	1.33915				27.854	0.734493			40.277	1.06208			106.003	2.79523
			22.848	0.710737												34.895	0.794854			19.356	0.4409			28.046	0.638845				46.617	1.22926			23.508	0.619892			116.011	3.05914
			43.041	1.33889												47.614	1.08457			26.85	0.611602			57.502	1.30981				29.449	0.776552			116.623	3.07528			120.829	3.18619
			26.887	0.836379												43.925	1.00054			33.418	0.761211			50.897	1.15936				39.295	1.03619			67.662	1.78421			118.653	3.12881
			38.637	1.20189												43.631	0.993847			28.276	0.644084			67.817	1.54477				33.956	0.895399			126.132	3.32602			100.984	2.66289
			43.991	1.36844												54.271	1.23621			65.473	1.49137			32.236	0.734286				43.033	1.13475			45.975	1.21233			118.818	3.13316
			30.681	0.9544												47.749	1.08765			23.388	0.532743			38.695	0.881413				30.59	0.80664			21.203	0.55911			86.956	2.29298
			39.52	1.22936												35.785	0.815127			22.912	0.5219			29.699	0.676497				28.553	0.752925			26.882	0.708862			117.406	3.09592
			42.802	1.33145												63.995	1.45771			32.937	0.750254			71.933	1.63852				42.744	1.12713			26.671	0.703298			112.555	2.96801
			40.108	1.24765												51.707	1.17781			24.244	0.552241			26.928	0.613378				32.758	0.863808			27.496	0.725053			127.546	3.36331
			51.111	1.58992												65.83	1.49951			40.318	0.918382			56.366	1.28393				39.493	1.04141			28.285	0.745858			36.501	0.962509
			52.551	1.63471												60.107	1.36914			31.762	0.723489			27.031	0.615725				32.346	0.852944			21.054	0.555181			109.454	2.88623
			39.796	1.23794												44.127	1.00515			40.612	0.925079			103.342	2.35397				27.513	0.725501			18.686	0.492738			131.137	3.458
			48.98	1.52363												76.568	1.7441			31.615	0.720141			111.709	2.54456				51.681	1.3628			40.971	1.08038			110.356	2.91002
			44.521	1.38492												41.663	0.949019			35.222	0.802303			26.639	0.606795				34.306	0.904628			23.226	0.612455			50.445	1.3302
			31.131	0.968398												31.113	0.708706			27.307	0.622011			48.821	1.11207				44.119	1.16339			24.188	0.637823			136.013	3.58658
			38.231	1.18926												42.189	0.961			60.417	1.37621			35.403	0.806426				39.594	1.04407			13.231	0.348893			159.125	4.19603
			33.938	1.05572												26.293	0.598914			32.536	0.74112			29.549	0.673081				35.706	0.941545			26.573	0.700714			121.699	3.20913
																60.614	1.38069			35.662	0.812325			68.899	1.56941				39.885	1.05174			22.093	0.582579			160	4.2191
			32.1469	1												64.951	1.47948			35.758	0.814512			62.429	1.42204				35.442	0.934584			23.319	0.614908			156.79	4.13446
																35.032	0.797975			32.108	0.731371			65.36	1.4888				40.992	1.08093			42.543	1.12183			45.551	1.20115
																39.763	0.90574			37.278	0.849135			65.005	1.48071				38.39	1.01232			21.975	0.579467			154.968	4.08641
																53.499	1.21862			37.348	0.85073			58.202	1.32575				29.91	0.788708			37.1	0.978304			138.806	3.66023
																43.18	0.983574			37.983	0.865194			62.84	1.4314				41.581	1.09647			27.306	0.720042			99.791	2.63143
																35.64	0.811824			24.953	0.568391			68.169	1.55278				35.881	0.94616			46.978	1.23878			72.303	1.90659
																32.94	0.750322			27.734	0.631738			90.868	2.06983				40.486	1.06759			106.494	2.80818			138.408	3.64973
																43.088	0.981478			34.443	0.784559			38.939	0.88697				58.292	1.53712			100.174	2.64153			164.893	4.34813
																47.493	1.08182			28.581	0.651031			47.814	1.08913				32.694	0.862121			98.871	2.60717			177.993	4.69357
																39.578	0.901526			34.63	0.788818			90.381	2.05874				42.435	1.11898			23.24	0.612825			67.884	1.79006
																39.068	0.889909			73.657	1.67779			42.191	0.961046				31.395	0.827867			73.436	1.93646			115.227	3.03847
																35.763	0.814626			53.02	1.20771			37.518	0.854602				37.861	0.998371			80.904	2.13339			156.681	4.13158
																43.113	0.982048			28.127	0.64069			69.415	1.58117				44.708	1.17892			66.685	1.75844			132.402	3.49136
																54.82	1.24872			79.365	1.80781			48.127	1.09626				45.75	1.2064			105.382	2.77886			114.339	3.01505
																53.337	1.21493			34.179	0.778545			52.993	1.2071				39.838	1.0505			90.104	2.37599			170.34	4.49176
																42.585	0.970021			53.642	1.22188			78.918	1.79763				40.14	1.05847			36.11	0.952199			175.794	4.63558
																34.738	0.791278			34.886	0.794649			51.206	1.16639				29.689	0.782881			66.102	1.74307			174.394	4.59866
																48.056	1.09464			72.891	1.66034			25.043	0.570441				31.602	0.833325			36.008	0.949509			160.812	4.24051
																41.291	0.940545			31.266	0.712191			59.413	1.35334				45.98	1.21246			25.614	0.675425			161.035	4.24639
																45.132	1.02804			51.82	1.18038			57.501	1.30978				35.71	0.941651			52.213	1.37682			195.296	5.14984
																45.852	1.04444			30.846	0.702624			72.585	1.65337				22.547	0.594551			63.685	1.67933			106.358	2.8046
																58.24	1.32662			36.251	0.825742			59.242	1.34944				18.538	0.488836			28.209	0.743854			171.171	4.51367
																38.518	0.877381			34.339	0.78219			48.576	1.10649				30.937	0.81579			20.234	0.533558			149.128	3.93241
																32.913	0.749707			22.452	0.511422			40.747	0.928154				34.811	0.917945			77.655	2.04771			165.538	4.36514
																51.575	1.1748			58.246	1.32675			36.585	0.83335				39.381	1.03845			20.692	0.545635			160.937	4.24381
																38.088	0.867586			27.75	0.632102			66.927	1.52449				51.188	1.3498			17.937	0.472988			165.374	4.36081
																52.254	1.19027			56.702	1.29158			42.825	0.975488				33.281	0.8776			53.856	1.42015			227.676	6.00368
																36.089	0.822052			50.306	1.14589			76.078	1.73294				36.969	0.97485			111.899	2.95071			162.687	4.28996
																19.3	0.439624			66.529	1.51543			59.753	1.36108				44.608	1.17629			118.539	3.1258			192.706	5.08154
																44.551	1.0148			32.08	0.730733			56.499	1.28696				26.392	0.695941			24.231	0.638957			131.811	3.47578
																61.261	1.39543			38.956	0.887358			39.857	0.907881				33.477	0.882768			103.016	2.71647			160.171	4.22361
																44.257	1.00811			29.587	0.673946			46.215	1.05271				35.694	0.941229			28.973	0.764			134.965	3.55894
																51.436	1.17163			70.845	1.61374			53.514	1.21897				26.997	0.711894			86.346	2.27689			225.824	5.95484
																40.821	0.92984			26.58	0.605451			71.381	1.62595				35.166	0.927306			105.989	2.79486			192.188	5.06788
																49.384	1.12489			55.982	1.27518			44.897	1.02268				42.044	1.10867			64.612	1.70378			132.498	3.49389
																52.276	1.19077			26.821	0.610941			37.804	0.861117				30.986	0.817082			68.078	1.79518			145.978	3.84935
																41.947	0.955488			101.161	2.30429			48.104	1.09574				31.204	0.82283			31.64	0.834327			36.343	0.958343
																41.699	0.949839			110.329	2.51312			99.89	2.27534				18.993	0.500834			106.882	2.81841			164.585	4.34001
																44.993	1.02487			27.049	0.616135			37.443	0.852894				25.088	0.661555			106.244	2.80159			153.486	4.04733
																25.41	0.578801			47.897	1.09102			44.839	1.02136				34.491	0.909506			16.566	0.436835			129.677	3.4195
																49.476	1.12699			35.333	0.804831			50.357	1.14705				34.185	0.901437			22.444	0.591834			123.746	3.26311
																51.59	1.17514			29.379	0.669208			59.809	1.36236				39.632	1.04507			31.761	0.837518			118.135	3.11515
																42.753	0.973848			67.921	1.54714			41.175	0.937903				24.585	0.648291			100.381	2.64699			131.63	3.471
																44.661	1.01731			60.933	1.38796			32.085	0.730847				20.214	0.533031			31.196	0.822619			177.516	4.68099
																40.651	0.925967			63.512	1.44671			77.362	1.76219				34.591	0.912143			119.842	3.16016			131.185	3.45927
																42.114	0.959292			65.026	1.48119			74.649	1.70039				29.886	0.788075			26.158	0.68977			124.149	3.27373
																50.408	1.14822			57.074	1.30006			68.996	1.57162				33.866	0.893026			26.944	0.710497			38.089	1.00438
																40.896	0.931548			61.688	1.40516			60.056	1.36798				44.976	1.18599			28.506	0.751686			132.44	3.49236
																39.306	0.89533			67.894	1.54652			69.574	1.58479				26.245	0.692065			23.136	0.610082			135.704	3.57843
																52.039	1.18537			88.732	2.02118			67.355	1.53424				40.304	1.06279			21.179	0.558477			112.84	2.97552
																34.929	0.795629			38.505	0.877085			71.807	1.63565				27.679	0.729878			108.601	2.86374			130.44	3.43962
																39.138	0.891503			47.902	1.09113			50.788	1.15687				31.089	0.819798			52.812	1.39262			154.14	4.06458
																48.716	1.10968			89.766	2.04473			47.65	1.08539				27.959	0.737262			147.546	3.8907			130.937	3.45273
																52.757	1.20172			42.461	0.967196			55.035	1.25361				37.943	1.00053			19.708	0.519688			141.724	3.73717
																48.864	1.11305			61.1	1.39176			47.972	1.09273				19.153	0.505053			84.745	2.23467			95.228	2.5111
																27.99	0.637569			36.57	0.833008			45.047	1.0261				32.413	0.854711			101.486	2.67612			138.197	3.64417
																55.671	1.2681			66.928	1.52452			59.869	1.36372				33.228	0.876202			120.599	3.18012			155.561	4.10205
																42.499	0.968062			46.827	1.06665			43.912	1.00025				32.348	0.852997			22.086	0.582394			67.309	1.7749
																43.559	0.992207			51.612	1.17564			56.775	1.29325				23.631	0.623135			103.355	2.72541			105.708	2.78746
																48.121	1.09612			77.112	1.75649			17.136	0.390332				23.126	0.609818			90.709	2.39194			115.27	3.0396
																30.752	0.700483			49.762	1.1335			67.292	1.53281				39.166	1.03278			26.426	0.696837			91.796	2.4206
																34.742	0.791369			45.891	1.04533			67.249	1.53183				20.877	0.550514			81.044	2.13708			89.698	2.36528
																17.174	0.391197			25.115	0.572081			66.035	1.50418				20.628	0.543948			62.257	1.64168			138.214	3.64462
																38.631	0.879955			61.579	1.40267			94.975	2.16338				27.934	0.736602			105.008	2.769			101.011	2.6636
																44.363	1.01052			70.721	1.61092			71.162	1.62096				29.674	0.782485			88.46	2.33264			37.929	1.00016
																48.07	1.09496			57.391	1.30728			55.322	1.26015				30.638	0.807905			28.027	0.739055			126.525	3.33639
																39.741	0.905239			57.558	1.31108			99.233	2.26037				49.444	1.30381			103.809	2.73738			130.549	3.4425
																50.492	1.15013			48.15	1.09678			76.011	1.73141				31.916	0.841605			116.207	3.06431			79.782	2.1038
																59.899	1.36441			57.443	1.30846			49.648	1.13091				36.039	0.950326			77.355	2.0398			84.943	2.23989
																44.223	1.00733			40.268	0.917243			81.888	1.86528				31.257	0.824228			114.03	3.0069			32.201	0.849121
																35.516	0.809			40.014	0.911457			60.247	1.37233				34.78	0.917127			133.722	3.52617			93.944	2.47725
																59.517	1.35571			65.507	1.49215			49.519	1.12797				34.425	0.907766			97.461	2.56999			149.103	3.93175
																47.651	1.08542			42.648	0.971456			60.94	1.38812				32.383	0.85392			115.105	3.03525			89.152	2.35088
																43.723	0.995943			74.425	1.69529			70.518	1.60629				28.568	0.753321			103.108	2.71889			104.279	2.74977
																44.849	1.02159			59.093	1.34605			41.309	0.940955				30.023	0.791688			20.264	0.534349			112.411	2.96421
																59.682	1.35946			55.364	1.26111			95.784	2.18181				22.941	0.60494			20.758	0.547376			130.119	3.43116
																53.165	1.21102			39.26	0.894282			56.227	1.28076				32.016	0.844242			24.936	0.657547			33.842	0.892393
																34.225	0.779593			45.077	1.02678			43.613	0.993437				39.157	1.03255			21.464	0.565992			46.889	1.23643
																48.791	1.11138			52.563	1.1973			54.248	1.23569				34.152	0.900567			26.362	0.69515			100.961	2.66228
																43.166	0.983255			70.464	1.60506			48.756	1.11059				43.53	1.14786			22.33	0.588828			133.36	3.51662
																35.004	0.797337			43.234	0.984804			52.08	1.1863				32.746	0.863492			18.564	0.489521			115.518	3.04614
																33.272	0.757885			37.45	0.853053			51.949	1.18332				37.463	0.987876			19.948	0.526017			106.071	2.79703
																35.986	0.819706			48.855	1.11284			47.516	1.08234				41.048	1.08241			25.724	0.678326			113.222	2.98559
																45.238	1.03045			97.162	2.2132			71.225	1.6224				31.549	0.831928			97.607	2.57384			109.338	2.88318
																49.807	1.13453			36.328	0.827496			47.292	1.07724				35.983	0.94885			49.384	1.30223			92.83	2.44787
																42.747	0.973711			43.591	0.992936			54.994	1.25268				28.903	0.762154			42.743	1.12711			93.154	2.45641
																25.961	0.591352			48.849	1.11271			89.43	2.03708				44.989	1.18633			17.508	0.461675			109.827	2.89607
																15.231	0.346939			58.27	1.3273			42.03	0.957379				31.073	0.819376			24.167	0.637269			25.821	0.680884
																41.669	0.949156			31.801	0.724378			72.457	1.65046				37.53	0.989643			20.989	0.553467			34.559	0.9113
																36.343	0.827838			40.649	0.925922			40.36	0.919339				32.598	0.859589			15.856	0.418113			48.056	1.26721
																45.161	1.0287			75.86	1.72797			51.553	1.1743				32.748	0.863545			20.322	0.535879			51.471	1.35726
																29.062	0.661988			74.425	1.69529			68.826	1.56775				33.071	0.872062			43.766	1.15408			45.179	1.19134
																30.482	0.694333			67.674	1.54151			41.299	0.940728				47.172	1.2439			47.504	1.25265			86.216	2.27346
																51.829	1.18058			60.717	1.38304			57.534	1.31054				35.839	0.945052			33.18	0.874936			85.987	2.26742
																27.634	0.62946			38.284	0.872051			40.182	0.915284				27.98	0.737815			52.331	1.37994			38.95	1.02709
																43.439	0.989474			31.639	0.720688			42.216	0.961615				25.985	0.685208			21.555	0.568392			38.978	1.02783
																20.014	0.455888			68.513	1.56062			68.895	1.56932				24.774	0.653275			36.114	0.952304			36.331	0.958026
																37.855	0.862279			66.402	1.51254			80.678	1.83772				16.457	0.433961			16.862	0.444641			60.332	1.59092
																26.003	0.592308			70.337	1.60217			56.647	1.29033				43.888	1.1573			33.874	0.893237
																40.803	0.92943			58.043	1.32213			64.263	1.46381				37.841	0.997844			15.985	0.421515
																53.291	1.21389			47.143	1.07384			58.923	1.34218				26.436	0.697101			18.332	0.483404
																42.352	0.964713			30.437	0.693308			49.201	1.12072				30.536	0.805216			53.031	1.39839
																28.178	0.641851			57.256	1.3042			66.437	1.51333				26.9	0.709336			33.323	0.878707
																34.588	0.787861			57.703	1.31439			77.806	1.7723				29.054	0.766136			17.011	0.44857
																20.737	0.472357			53.792	1.2253			78.56	1.78948				31.143	0.821222			64.839	1.70976
																35.53	0.809319			53.625	1.22149			83.172	1.89453				29.535	0.77882			37.245	0.982128
																42.057	0.957994			47.411	1.07995			79.108	1.80196				26.841	0.707781			65.601	1.72986
																41.918	0.954828			45.598	1.03865			88.881	2.02457				23.894	0.63007			93.552	2.46691
																27.935	0.636316			44.78	1.02002			79.284	1.80597				29.193	0.769801			40.372	1.06458
																31.336	0.713786			58.156	1.3247			77.09	1.75599				25.254	0.665932			31.017	0.817899
																27.873	0.634904			42.55	0.969223			67.118	1.52884				34.247	0.903072			41.953	1.10627
																40.744	0.928086			67.404	1.53536			80.496	1.83357				34.268	0.903626			48.503	1.27899
																37.242	0.848315			55.488	1.26393			43.584	0.992776				36.598	0.965067			18.761	0.494716
																36.739	0.836858			17.099	0.389489			60.103	1.36905				39.32	1.03684			74.785	1.97203
																54.973	1.2522			66.495	1.51465			41.516	0.945671				36.727	0.968468			103.579	2.73131
																40.516	0.922892			60.216	1.37163			60.383	1.37543				39.747	1.0481			18.085	0.47689
																30.803	0.701645			89.461	2.03778			57.188	1.30265				28.613	0.754507			48.39	1.27601
																38.461	0.876082			65.428	1.49035			55.581	1.26605				27.368	0.721677			74.363	1.96091
																48.89	1.11364			70.401	1.60363			70.56	1.60725				30.351	0.800337			62.806	1.65616
																35.726	0.813783			54.699	1.24596			59.454	1.35427				24.351	0.642121			78.663	2.07429
																12.461	0.283842			45.548	1.03751			61.341	1.39725				34.61	0.912644			44.497	1.17336
																44.974	1.02444			89.888	2.04751			64.746	1.47481				38.83	1.02392			26.858	0.708229
																64.904	1.47841			77.596	1.76752								20.964	0.552808			46.619	1.22931
																57.243	1.30391			47.8	1.08881								47.57	1.25439			64.608	1.70367
																51.735	1.17844			79.718	1.81585								33.714	0.889017			36.734	0.968653
																40.159	0.91476			82.109	1.87032								32.22	0.849622			65.043	1.71514
																36.669	0.835263			53.782	1.22507								30.111	0.794009			44.32	1.16869
																48.388	1.1022			58.178	1.32521								35.062	0.924563			33.62	0.886539
																31.243	0.711667			49.183	1.12031								27.093	0.714426			15.894	0.419115
																45.887	1.04524			59.868	1.3637								24.735	0.652247			49.606	1.30808
																42.003	0.956764			69.232	1.577								26.296	0.693409			20.359	0.536854
																54.414	1.23947			39.579	0.901549								25.624	0.675689			84.504	2.22832
																44.062	1.00366			67.977	1.54841								24.501	0.646076			32.814	0.865285
																71.31	1.62433			52.237	1.18988								23.587	0.621975			69.277	1.82679
																43.541	0.991797			42.405	0.965921								28.412	0.749207			73.746	1.94464
																47.084	1.0725			47.951	1.09225								31.589	0.832983			15.036	0.39649
																41.887	0.954121			51.15	1.16512								39.68	1.04634			15.353	0.404849
																22.243	0.506661			47.118	1.07328								27.314	0.720253			20.684	0.545424
																37.524	0.854739			43.238	0.984895								26.317	0.693963			23.701	0.624981
																41.771	0.951479			69.841	1.59087								19.839	0.523142			29.412	0.775576
																43.077	0.981228			54.606	1.24384								28.476	0.750895			16.872	0.444904
																70.892	1.61481			46.447	1.05799								28.173	0.742905			32.851	0.866261
																52.967	1.20651			88.441	2.01455								49.818	1.31367			21.595	0.569447
																56.708	1.29172			53.77	1.2248								30.007	0.791266
																38.496	0.87688			49.77	1.13368								26.068	0.687397
																55.704	1.26885			53.757	1.2245								28.66	0.755747
																69.319	1.57898			41.263	0.939908								36.207	0.954756
																51.747	1.17872			70.85	1.61385								45.789	1.20743
																33.787	0.769616			39.57	0.901344								42.641	1.12442
																32.958	0.750733			47.626	1.08485								30.971	0.816686
																36.348	0.827951			57.332	1.30593								34.019	0.89706
																52.835	1.2035			67.153	1.52964								24.266	0.63988
																31.28	0.71251			40.657	0.926104								29.463	0.776921
																31.119	0.708843			57.636	1.31286								35.357	0.932342
																39.77	0.905899			58.721	1.33757								35.955	0.948111
																55.36	1.26102			41.869	0.953711								27.433	0.723391
																25.487	0.580555			42.058	0.958016								28.91	0.762339
																35.675	0.812622			68.244	1.55449								27.492	0.724947
																34.273	0.780686			42.839	0.975806								39.503	1.04167
																34.124	0.777292			38.012	0.865855								31.307	0.825546
																32.26	0.734833			79.875	1.81943								26.021	0.686158
																20.479	0.46648			55.636	1.2673								36.431	0.960663
																27.354	0.623082			62.643	1.42691								32.998	0.870137
																37.789	0.860775			58.339	1.32887								40.43	1.06611
																28.22	0.642808			48.108	1.09583								43.216	1.13958
																32.452	0.739207			66.082	1.50525								37.425	0.986874
																42.26	0.962618			76.584	1.74447								44.024	1.16089
																29.773	0.678183			78.774	1.79435								35.52	0.936641
																38.869	0.885376			80.182	1.82642								29.366	0.774363
																28.441	0.647842			79.944	1.821								47.8	1.26046
																34.695	0.790299			87.16	1.98537								29.112	0.767666
																28.684	0.653377			78.559	1.78945								30.47	0.803475
																25.875	0.589393			75.035	1.70918								35.623	0.939357
																28.19	0.642125			65.469	1.49128								25.37	0.668991
																43.622	0.993642			47.868	1.09036								49.138	1.29574
																31.355	0.714219			79.024	1.80005								28.908	0.762286
																22.921	0.522105			51.771	1.17926								33.871	0.893157
																28.769	0.655314			40.484	0.922163								34.749	0.91631
																116.653	2.65718			58.916	1.34202								26.792	0.706489
																32.629	0.743238			56.121	1.27835								34.143	0.90033
																30.781	0.701144			69.888	1.59194								26.802	0.706752
																44.532	1.01437			55.087	1.2548								19.032	0.501862
																31.107	0.70857			57.511	1.31001								19.271	0.508164
																29.287	0.667113			59.404	1.35313								28.162	0.742615
																38.545	0.877996			63.704	1.45108								27.755	0.731882
																26.988	0.614745												23.848	0.628857
																25.794	0.587548												28.76	0.758384
																42.624	0.970909												19.506	0.514361
																23.865	0.543608												50.656	1.33577
																36.7	0.835969												26.416	0.696574
																43.776	0.99715												25.776	0.679697
																38.079	0.867381												23.898	0.630176
																32.82	0.747589												33.75	0.889967
																44.759	1.01954												28.049	0.739635
																43.684	0.995054												41.302	1.08911
																45.675	1.04041												38.559	1.01678
																50.449	1.14915												25.652	0.676427
																49.994	1.13879												14.965	0.394618
																38.423	0.875217												26.368	0.695308
																33.724	0.768181												35.669	0.94057
																43.327	0.986922												34.597	0.912302
																31.216	0.711052												30.262	0.79799
																34.567	0.787383												26.196	0.690772
																38.854	0.885034												31.655	0.834723
																26.105	0.594632												19.038	0.50202
																43.761	0.996808												20.18	0.532134
																41.948	0.955511												27.644	0.728955
																32.574	0.741986												28.682	0.756327
																47.024	1.07113												33.636	0.886961
																42.658	0.971684												26.669	0.703245
																47.117	1.07325												28.814	0.759807
																48.894	1.11373												31.431	0.828816
																40.866	0.930865												22.856	0.602699
																32.999	0.751666												30.233	0.797226
																34.294	0.781165												18.745	0.494294
																50.901	1.15945												22.923	0.604465
																47.955	1.09234												19.425	0.512225
																39.482	0.899339												31.23	0.823516
																50.705	1.15498												32.189	0.848804
																46.808	1.06621												17.557	0.462967
																46.076	1.04954												21.983	0.579678
																40.47	0.921844												38.951	1.02711
																63.34	1.44279												31.078	0.819508
																37.264	0.848817												21.889	0.577199
																47.178	1.07464												18.83	0.496536
																52.233	1.18979												19.149	0.504947
																35.415	0.806699												19.883	0.524302
																54.087	1.23202												20.357	0.536802
																41.691	0.949657												33.895	0.89379
																39.792	0.9064												30.955	0.816264
																58.385	1.32992												48.364	1.27533
																47.504	1.08207												20.328	0.536037
																48.478	1.10425												33.653	0.887409
																43.076	0.981205												17.262	0.455188
																25.214	0.574336												27.829	0.733834
																51.152	1.16516												34.958	0.921821
																49.555	1.12879												32.515	0.857401
																54.246	1.23564												38.173	1.0066
																43.609	0.993346												40.699	1.07321
																47.585	1.08391												24.423	0.64402
																51.391	1.17061												30.148	0.794984
																57.148	1.30174												41.668	1.09876
																52.249	1.19015												41.944	1.10604
																50.091	1.141												20.219	0.533163
																58.807	1.33953												15.753	0.415397
																36.192	0.824398												25.425	0.670442
																52.637	1.19899												30.418	0.802104
																63.796	1.45317												24.851	0.655306
																59.774	1.36156												45.753	1.20648
																53.843	1.22646												28.557	0.753031
																44.436	1.01218												40.173	1.05934
																53.509	1.21885												25.669	0.676876
																63.074	1.43673												44.004	1.16036
																46.867	1.06756												25.907	0.683152
																46.458	1.05824												42.609	1.12357
																27.432	0.624859												36.824	0.971026
																56.128	1.27851												34.218	0.902308
																42.4	0.965807												60.531	1.59617
																50.512	1.15059												23.737	0.62593
																63.283	1.44149												31.483	0.830187
																60.208	1.37145												23.298	0.614354
																60.695	1.38254												53.029	1.39834
																40.66	0.926172												23.217	0.612218
																35.422	0.806859												46.477	1.22557
																45.49	1.03619												51.723	1.3639
																51.324	1.16908												22.74	0.59964
																53.84	1.22639												33.269	0.877283
																56.136	1.27869												44.532	1.17428
																41.826	0.952732												24.421	0.643967
																50.555	1.15157												39.213	1.03402
																48.393	1.10232												27.458	0.724051
																50.742	1.15582												35.564	0.937801
																39.1	0.890638												48.909	1.2897
																49.024	1.11669												46.481	1.22568
																53.362	1.2155												47.699	1.25779
																33.459	0.762145												24.323	0.641383
																53.314	1.21441												28.299	0.746227
																38.741	0.88246												45.149	1.19055
																44.097	1.00446												47.514	1.25291
																43.15	0.982891												58.838	1.55152
																54.381	1.23872												27.285	0.719489
																57.483	1.30937												53.199	1.40282
																41.084	0.93583												28.717	0.75725
																40.013	0.911435												37.699	0.994099
																27.147	0.618367												26.644	0.702586
																49.318	1.12339												44.078	1.16231
																33.08	0.753511												40.279	1.06213
																62.507	1.42381												52.555	1.38584
																42.798	0.974873												46.758	1.23298
																47.887	1.09079												17.971	0.473884
																33.239	0.757133												43.001	1.13391
																43.205	0.984143												34.803	0.917734
																27.246	0.620622												27.978	0.737763
																25.893	0.589803												26.767	0.705829
																45.33	1.03255												39.789	1.04921
																34.65	0.789274												45.909	1.21059
																23.064	0.525362												29.475	0.777238
																45.521	1.0369												24.994	0.659076
																41.773	0.951525												35.767	0.943154
																20.077	0.457323												44.043	1.16139
																35.279	0.803601												30.941	0.815895
																31.522	0.718023												24.755	0.652774
																23.111	0.526433												43.734	1.15324
																54.619	1.24414												23.091	0.608895
																26.064	0.593698												36.234	0.955468
																40.815	0.929703												25.32	0.667673
																34.01	0.774695												28.979	0.764158
																20.866	0.475295												34.72	0.915545
																													40.627	1.07131
																													23.727	0.625666
																													29.928	0.789183
																													39.566	1.04333
																													50.316	1.3268
																													31.911	0.841473
																													31.554	0.83206
																													38.568	1.01701
																													33.443	0.881871
																													37.668	0.993282
																													37.882	0.998925
																													29.753	0.784568
																													29.247	0.771225
																													31.232	0.823569
																													30.3	0.798992
																													38.537	1.0162
																													29.911	0.788735
																													35.961	0.948269
																													33.512	0.883691
																													18.648	0.491736
																													29.645	0.78172
																													36.393	0.959661
																													28.753	0.758199
																													26.204	0.690983
																													33.357	0.879604
																													38.923	1.02638
																													33.158	0.874356
																													28.871	0.761311
																													29.713	0.783514
																													29.64	0.781589
																													28.392	0.74868
																													22.28	0.58751
																													25.402	0.669835
																													44.419	1.1713
																													28.837	0.760414
																													23.316	0.614829
																													40.833	1.07674
																													18.845	0.496931
																													37.178	0.980361
																													29.215	0.770382
																													19.532	0.515047
																													31.855	0.839997
																													21.58	0.569051
																													25.23	0.6653
																													39.085	1.03065
																													26.285	0.693119
																													28.08	0.740452
																													27.364	0.721572
																													21.755	0.573666
																													36.104	0.95204
																													36.502	0.962535
																													32.202	0.849147
																													36.244	0.955732
																													28.139	0.742008
																													36.487	0.96214
																													31.178	0.822145
																													19.423	0.512173
																													24.251	0.639484
																													18.244	0.481083
																													32.449	0.85566
																													26.948	0.710602
																													20.68	0.545319
																													27.853	0.734466
																													32.349	0.853023
																													32.142	0.847565
																													30.71	0.809804
																													21.155	0.557844
																													23.662	0.623952
																													34.683	0.914569
																													38.15	1.00599
																													32.832	0.86576
																													29.426	0.775946
																													34.518	0.910218
																													33.343	0.879234
																													24.578	0.648107
																													31.535	0.831559
																													29.112	0.767666
																													31.155	0.821538
																													42.697	1.12589
																													32.276	0.851098
																													32.271	0.850966
																													23.368	0.6162
																													21.07	0.555603
																													20.127	0.530737
																													34.933	0.921162
																													46.616	1.22924
																													42.417	1.11851
																													38.233	1.00818
																													25.949	0.684259
																													22.025	0.580786
																													36.095	0.951803
																													26.445	0.697338
																													26.153	0.689639
																													25.329	0.66791
																													33.981	0.896058
																													34.362	0.906105
																													34.913	0.920634
																													28.369	0.748073
																													19.369	0.510749
																													36.879	0.972477
																													28.858	0.760968
																													32.664	0.86133
																													25.007	0.659419
																													28.223	0.744223
																													22.442	0.591782
																													28.017	0.738791
																													24.284	0.640354
																													24.192	0.637928
																													27.016	0.712395
																													24.164	0.63719
																													23.853	0.628989
																													20.795	0.548351
																													27.951	0.737051
																													25.374	0.669097
																													29.6	0.780534
																													23.532	0.620524
																													21.434	0.565201
																													23.054	0.60792
																													30.709	0.809777
																													40.099	1.05739
																													22.438	0.591676
																													23.835	0.628514
																													35.901	0.946687
																													25.129	0.662636
																													18.725	0.493767
																													31.991	0.843583
																													25.028	0.659973
																													43.888	1.1573
																													21.094	0.556236
																													16.664	0.439419
																													20.67	0.545055
																													16.253	0.428582
																													34.452	0.908478
																													34.633	0.913251
																													32.472	0.856267
																													15.993	0.421726
																													15.604	0.411468
																													25.092	0.661661
																													18.365	0.484274
																													34.242	0.90294
																													18.476	0.487201
																													16.206	0.427342
																													30.206	0.796514
																													16.988	0.447963
																													24.094	0.635344
																													22.029	0.580891
																													21.354	0.563092
																													17.486	0.461095
																													24.986	0.658865
																													30.993	0.817266
																													17.602	0.464154
																													27.267	0.719014
																													28.92	0.762603
																													18.649	0.491763
																													25.97	0.684813
																													26.056	0.687081
																													25.368	0.668939
																													28.169	0.742799
																													18.411	0.485487
																													24.047	0.634105
																													25.83	0.681121
																													23.668	0.624111
																													17.138	0.451919
																													28.132	0.741824
																													27.804	0.733174
																													19.71	0.519741
																													25.996	0.685499
																													24.981	0.658734
																													19.078	0.503075
																													25.464	0.67147
																													23.336	0.615356
																													25.617	0.675505
																													22.016	0.580548
																													20.684	0.545424
																													16.606	0.43789
																													24.235	0.639062
																													22.356	0.589514
																													29.715	0.783566
																													22.514	0.59368
																													18.719	0.493609
																													18.571	0.489706
																													18.062	0.476284
																													22.089	0.582473
																													17.631	0.464919
																													24.286	0.640407
																													15.297	0.403372
																													28.983	0.764264
																													24.863	0.655622
																													16.505	0.435227
																													23.609	0.622555
																													19.625	0.517499
																													21.313	0.562011
																													21.436	0.565254
																													22.225	0.58606
																													16.221	0.427738
																													17.96	0.473594
																													21.49	0.566678
																													20.952	0.552491
																													28.781	0.758937
																													23.628	0.623056
																													19.445	0.512753
																													18.451	0.486542
																													21.125	0.557053
																													19.003	0.501097
																													24.56	0.647632
																													29.709	0.783408
																													19.471	0.513438
																													19.311	0.509219
																													31.495	0.830504
																													17.401	0.458854
																													16.193	0.426999
																													18.022	0.475229
																													33.758	0.890178
																													29.876	0.787812
																													18.961	0.49999
																													32.459	0.855924
																													43.313	1.14214
																													13.873	0.365822
																													15.99	0.421646
																													21.714	0.572585
																													15.539	0.409754
																													18.834	0.496641
																													21.895	0.577358
																													17.987	0.474306
																													23.052	0.607867
																													17.866	0.471115
																													28.309	0.746491
																													32.462	0.856003
																													10.117	0.266779
																													30.948	0.81608
																													14.623	0.3856
																													36.005	0.94943
																													22.429	0.591439
																													17.463	0.460489
																													14.398	0.379666
																													18.567	0.4896
																													19.074	0.50297
																													16.015	0.422306
																													39.118	1.03152
																													24.73	0.652115
																													18.321	0.483114
																													18.583	0.490022
																													22.995	0.606364
																													18.998	0.500966
																													27.722	0.731012
																													21.612	0.569895
																													24.805	0.654093
																													17.324	0.456823
																													37.028	0.976406
																													29.863	0.787469
																													15.834	0.417533
																													30.038	0.792084
																													11.967	0.315562
																													18.33	0.483351
																													17.385	0.458432
																													22.874	0.603173
																													20.327	0.53601
																													17.34	0.457245
																													41.397	1.09161
																													13.646	0.359837
																													24.781	0.65346
																													20.515	0.540968
																													29.687	0.782828
																													13.357	0.352216
																													19.58	0.516313
																													47.039	1.24039
																													32.332	0.852575
																													17.575	0.463442
																													28.075	0.74032
																													22.357	0.58954
																													29.502	0.77795
																													19.656	0.518317
																													21.126	0.55708
																													21.599	0.569552
																													34.879	0.919738
																													17.377	0.458221
																													22.449	0.591966
																													21.816	0.575275
																													32.335	0.852654
																													34.099	0.89917
																													19.217	0.50674
																													28.218	0.744091
																													22.633	0.596818
																													21.932	0.578333
																													23.295	0.614275
																													26.647	0.702665
																													16.676	0.439736
																													21.563	0.568603
																													26.931	0.710154
																													23.067	0.608263
																													18.11	0.47755
																													16.552	0.436466
																													17.227	0.454265
																													20.7	0.545846
																													17.888	0.471696
																													17.043	0.449413
																													18.007	0.474834
																													18.659	0.492026
																													20.017	0.527836
																													16.313	0.430164
																													22.968	0.605652
																													16.863	0.444667
																													19.913	0.525094
																													22.461	0.592283
																													15.42	0.406616
																													18.457	0.4867
																													20.484	0.54015
																													18.89	0.498118
																													18.644	0.491631
																													20.722	0.546426
																													16.74	0.441424
																													18.827	0.496456
																													18.199	0.479896
																													19.372	0.510828
																													18.494	0.487675
																													24.58	0.648159
																													27.059	0.713529
																													18.617	0.490919
																													23.953	0.631626
																													15.998	0.421857
																													19.294	0.508771
																													18.062	0.476284
																													19.35	0.510248
																													15.3	0.403452
																													15.247	0.402054
																													23.428	0.617782
																													19.344	0.510089
																													14.424	0.380352
																													20.168	0.531818
																													17.886	0.471643
																													14.666	0.386733
																													15.715	0.414395
																													18.744	0.494268
																													18.627	0.491183
																													19.844	0.523274
																													13.593	0.358439
																													17.257	0.455056
																													11.132	0.293544
																													24.026	0.633551
																													21.811	0.575143
																													24.662	0.650322
																													25.928	0.683705
																													18.97	0.500227
																													34.105	0.899328
																													20.825	0.549142
																													18.364	0.484247
																													16.705	0.440501
																													22.81	0.601486
																													15.651	0.412707
																													14.733	0.3885
																													20.307	0.535483
																													40.004	1.05488
																													12.768	0.336684
																													18.184	0.479501
																													31.799	0.83852
																													34.754	0.916442
																													12.626	0.33294
																													16.409	0.432695
																													18.46	0.486779
																													21.967	0.579256
																													17.818	0.46985
																													37.499	0.988826
																													16.832	0.443849
																													17.993	0.474464
																													23.391	0.616806
																													15.058	0.39707
																													19.549	0.515495
																													30.483	0.803818
																													19.864	0.523801
																													14.235	0.375368
																													23.477	0.619074
																													17.124	0.451549
																													17.604	0.464207
																													18.065	0.476363
																													19.886	0.524382
																													20.894	0.550962
																													15.005	0.395673
																													26.585	0.70103
																													16.385	0.432062
																													15.908	0.419484
																													18.37	0.484406
																													15.988	0.421594
																													19.908	0.524962
																													19.758	0.521006
																													22.99	0.606232
																													26.631	0.702243
																													24.329	0.641541
																													15.804	0.416742
																													26.123	0.688847
																													26.51	0.699052
																													16.85	0.444324
																													24.024	0.633498
																													25.06	0.660817
																													23.743	0.626088
																													22.456	0.592151
																													22.991	0.606259
																													15.122	0.398758
																													25.972	0.684866
																													17.899	0.471986
																													17.309	0.456428
																													23.37	0.616253
																													24.015	0.633261
																													17.86	0.470957
																													24.023	0.633472
																													20.668	0.545002
																													21.068	0.55555
																													18.821	0.496298
																													15.076	0.397545
																													20.021	0.527941
																													19.013	0.501361
																													18.156	0.478763
																													17.142	0.452024
																													20.902	0.551173
																													16.577	0.437125
																													17.406	0.458986
																													17.969	0.473831
																													14.032	0.370015
																													11.095	0.292568
																													15.391	0.405851
																													14.62	0.38552
																													21.292	0.561457
																													17.996	0.474543
																													19.717	0.519925
																													15.597	0.411283
																													20.433	0.538806
																													17.214	0.453923
																													20.84	0.549538
																													19.424	0.512199
																													20.995	0.553625
																													18.188	0.479606
																													16.804	0.443111
																													19.54	0.515258
																													18.542	0.488941
																													17.742	0.467846
																													17.31	0.456454
																													17.322	0.45677
																													15.636	0.412312
																													16.957	0.447146
																													17.583	0.463653
																													14.717	0.388078
																													15.741	0.41508
																													19.014	0.501387
																													20.499	0.540546
																													15.199	0.400788
																													17.058	0.449809
																													20.695	0.545714
																													16.266	0.428924
																													17.948	0.473278
																													16.818	0.44348
																													13.304	0.350818
																													22.015	0.580522
																													14.995	0.395409
																													15.362	0.405087
																													18.307	0.482744
																													18.513	0.488176
																													13.351	0.352058
																													15.549	0.410018
																													13.619	0.359125
																													17.46	0.460409
																													17.401	0.458854
																													20.184	0.53224
																													19.077	0.503049
																													20.689	0.545556
																													16.695	0.440237
																													15.112	0.398494

## Sheet: F5S1F
SOX2 level analysis in hESCs cocultures with YSLCs in 3D
units= fluorescence intensity (a.u.)
		Exp 1	10.6947	1			8.05763	0.753424			Exp 2	29.2551	1			42.0849	1.43855			Exp 3	20.571	1			22.0401	1.07142
		Control	SOX2	rel SOX2		+ YSLC	SOX2	rel SOX2			Control	SOX2	rel SOX2		+ YSLC	SOX2	rel SOX2			Control	SOX2	rel SOX2		+ YSLC	SOX2	rel SOX2					SOX2
			7.662	0.716431			3.651	0.341385				14.053	0.480361			41.565	1.42078				10.887	0.52924			3.058	0.148656					hESC	+YSLC
			10.12	0.946265			3.7	0.345966				3.617	0.123637			17.403	0.594871				16.351	0.794856			7.42	0.360702				Number of values	773	1198
			10.919	1.02097			5.313	0.496789				40.003	1.36739			54.082	1.84863				25.699	1.24928			18.001	0.875066
			9.357	0.874921			4.217	0.394308				35.952	1.22891			24.358	0.832607				38.035	1.84896			5.541	0.269359				Minimum	0.08643	0.09185
			10.316	0.964592			2.954	0.276212				17.886	0.611381			36.185	1.23688				36.71	1.78455			7.555	0.367264				25% Percentile	0.7304	0.8171
			10.296	0.962722			5.352	0.500436				18.939	0.647374			54.177	1.85188				26.069	1.26727			36.283	1.76379				Median	0.9757	1.221
			6.579	0.615166			4.151	0.388137				25.068	0.856876			41.767	1.42768				47.527	2.31039			2.841	0.138107				75% Percentile	1.24	1.65
			11.425	1.06829			3.94	0.368407				46.125	1.57665			47.578	1.62631				18.26	0.887656			18.88	0.917796				Maximum	2.842	3.172
			8.996	0.841166			4.638	0.433674				32.717	1.11833			50.91	1.74021				40.319	1.95999			18.149	0.88226
			8.766	0.81966			4.514	0.422079				46.07	1.57477			14.186	0.484907				38.198	1.85688			23.968	1.16513				Mean	1	1.262
			12.032	1.12505			5.279	0.49361				15.914	0.543973			56.316	1.925				22.565	1.09693			15.413	0.749258				Std. Deviation	0.4238	0.5776
			8.139	0.761033			6.108	0.571125				19.178	0.655544			46.76	1.59835				4.372	0.212532			13.839	0.672742				Std. Error of Mean	0.01524	0.01669
			9.56	0.893902			5.766	0.539147				21.668	0.740657			58.885	2.01281				18.203	0.884886			18.321	0.890622
			8.838	0.826392			5.873	0.549152				30.787	1.05236			60.993	2.08487				33.164	1.61217			13.413	0.652034				Lower 95% CI of mean	0.9701	1.229
			10.652	0.996009			6.489	0.60675				23.832	0.814627			60.086	2.05386				19.41	0.94356			6.515	0.316708				Upper 95% CI of mean	1.03	1.294
			6.571	0.614418			7.263	0.679123				23.739	0.811448			38.236	1.30699				36.912	1.79437			12.521	0.608672
			10.071	0.941683			6.571	0.614418				27.898	0.953611			47.492	1.62337				12.274	0.596665			7.854	0.381799				Sum	773	1511
			12.757	1.19284			10.709	1.00134				35.543	1.21493			40.423	1.38174				14.477	0.703757			27.854	1.35404
			11.713	1.09522			7.389	0.690904				10.843	0.370636			56.281	1.9238				12.038	0.585192			20.884	1.01521				D'Agostino & Pearson normality test
			7.814	0.730644			15.195	1.4208				34.796	1.1894			50.619	1.73026				25.067	1.21856			29.587	1.43829				K2	49.6	36.37
			11.489	1.07427			17.642	1.64961				42.495	1.45257			20.705	0.70774				11.785	0.572893			8.448	0.410675				P value	<0.0001	<0.0001
			13.861	1.29607			4.737	0.442931				19.734	0.674549			47.974	1.63985				29.003	1.4099			26.33	1.27996				Passed normality test (alpha=0.05)?	No	No
			14.666	1.37134			4.707	0.440125				26.259	0.897587			27.046	0.924488				29.289	1.4238			19.021	0.92465				P value summary	****	****
			11.382	1.06427			10.051	0.939813				31.983	1.09325			34.132	1.1667				27.14	1.31933			29.683	1.44295
			8.155	0.762529			4.524	0.423014				45.718	1.56274			39.87	1.36284				21.973	1.06815			22.008	1.06985
			10.272	0.960478			8.151	0.762155				45.262	1.54715			33.745	1.15347				21.036	1.0226			6.523	0.317097
			10.657	0.996477			9.499	0.888199				28.104	0.960653			49.393	1.68835				26.417	1.28419			23.857	1.15974
			4.287	0.400854			7.18	0.671362				21.039	0.719157			43.67	1.49273				25.875	1.25784			23.019	1.119				Column B	+YSLC
			11.41	1.06689			3.85	0.359992				29.045	0.992818			24.061	0.822455				25.236	1.22677			18.013	0.875649				vs.	vs.
			12.48	1.16694			5.171	0.483511				14.944	0.510817			15.083	0.515568				8.872	0.431286			10.184	0.495065				Column A	hESC
			11.525	1.07764			7.9	0.738685				10.529	0.359903			20.012	0.684052				28.887	1.40426			21.283	1.03461
			13.762	1.28681			9.784	0.914847				15.264	0.521755			30.449	1.04081				22.657	1.1014			21.996	1.06927				Mann Whitney test
			8.331	0.778985			10.611	0.992176				34.612	1.18311			43.058	1.47181				11.386	0.553497			26.445	1.28555				P value	<0.0001
			11.323	1.05875			5.984	0.559531				36.584	1.25052			78.943	2.69844				17.082	0.830391			21.527	1.04647				Exact or approximate P value?	Approximate
			7.755	0.725127			5.297	0.495293				43.689	1.49338			55.907	1.91102				50.717	2.46546			24.871	1.20903				P value summary	****
			13.546	1.26661			5.3	0.495574				31.261	1.06857			2.987	0.102102				23.064	1.12119			8.421	0.409362				Significantly different (P < 0.05)?	Yes
			12.157	1.13673			7.072	0.661263				28.312	0.967763			83.586	2.85714				27.259	1.32512			8.091	0.39332				One- or two-tailed P value?	Two-tailed
			13.716	1.28251			10.297	0.962815				24.903	0.851236			79.29	2.7103				23.489	1.14185			29.717	1.4446				Sum of ranks in column A,B	640799 , 1302607
			8.876	0.829945			8.436	0.788803				47.838	1.6352			33.466	1.14394				33	1.6042			19.338	0.94006				Mann-Whitney U	341648
			10.376	0.970202			10.602	0.991334				37.831	1.29314			38.525	1.31686				33.082	1.60818			9.878	0.48019
			9.601	0.897736			7.442	0.69586				16.122	0.551083			67.071	2.29263				50.571	2.45836			6.439	0.313013				Difference between medians
			14.341	1.34095			11.999	1.12196				32.083	1.09666			33.575	1.14766				45.384	2.20621			21.092	1.02533				Median of column A	0.9757, n=773
			9.919	0.927471			10.719	1.00227				25.593	0.874822			49.999	1.70907				50.529	2.45632			25.304	1.23008				Median of column B	1.221, n=1198
			6.483	0.606189			18.13	1.69524				35.469	1.2124			39.147	1.33813				28.902	1.40499			22.639	1.10053				Difference: Actual	0.2455
			13.689	1.27998			6.32	0.590948				30.073	1.02796			57.619	1.96954				20.367	0.990082			26.754	1.30057				Difference: Hodges-Lehmann	0.2403
			16.047	1.50047			9.637	0.901102				23.35	0.798151			68.438	2.33935				21.667	1.05328			32.363	1.57323
			13.913	1.30093			8.376	0.783193				30.924	1.05705			32.412	1.10791				20.475	0.995332			17.291	0.840551
			14.619	1.36694			5.778	0.540269				33.443	1.14315			55.796	1.90722				21.371	1.03889			23.621	1.14827
			14.366	1.34328			5.948	0.556164				26.751	0.914405			31.778	1.08624				30.097	1.46308			25.433	1.23635
			11.297	1.05632			4.798	0.448634				10.059	0.343837			49.44	1.68996				20.133	0.978707			12.608	0.612901
			7.088	0.662759			9.384	0.877446				30.068	1.02779			70.873	2.42259				12.124	0.589373			22.779	1.10733
			7.711	0.721013			11.193	1.0466				43.304	1.48022			30.391	1.03883				27.375	1.33076			26.413	1.28399
			12.075	1.12907			6.525	0.610116				24.203	0.827309			55.746	1.90551				29.048	1.41208			9.33	0.453551
			10.91	1.02013			8.578	0.802081				35.407	1.21028			56.187	1.92059				33.602	1.63346			18.125	0.881094
			10.535	0.985069			9.363	0.875482				33.811	1.15573			63.449	2.16882				28.693	1.39483			23.422	1.13859
			10.552	0.986659			8.828	0.825457				22.493	0.768857			68.195	2.33105				22.696	1.1033			8.483	0.412376
			11.089	1.03687			8.079	0.755422				26.514	0.906303			75.255	2.57237				40.812	1.98396			16.536	0.803849
			10.067	0.941309			7.75	0.724659				26.208	0.895844			62.978	2.15272				17.851	0.867774			22.885	1.11249
			12.749	1.19209			11.869	1.1098				17.059	0.583112			39.007	1.33334				16.959	0.824412			6.03	0.293131
			6.623	0.61928			8.044	0.75215				29.049	0.992955			69.369	2.37118				35.647	1.73287			19.772	0.961158
			11.889	1.11167			14.23	1.33057				7.149	0.244368			41.896	1.43209				22.161	1.07729			25.351	1.23236
			13.349	1.24819			12.293	1.14945				16.577	0.566636			57.384	1.9615				25.49	1.23912			14.079	0.684409
			10.041	0.938878			18.541	1.73367				16.598	0.567354			48.204	1.64771				26.585	1.29235			22.427	1.09022
			12.53	1.17161			9.727	0.909518				37.762	1.29078			49.237	1.68302				33.774	1.64182			22.314	1.08473
			9.538	0.891845			8.753	0.818444				19.885	0.67971			60.177	2.05697				11.492	0.55865			14.256	0.693014
			8.243	0.770757			6.653	0.622085				26.654	0.911089			47.436	1.62146				27.066	1.31573			20.399	0.991638
			13.236	1.23762			9.254	0.86529				30.396	1.039			60.323	2.06197				21.627	1.05133			16.813	0.817315
			10.455	0.977589			5.86	0.547936				20.661	0.706236			58.204	1.98953				31.934	1.55238			21.122	1.02678
			11.593	1.084			6.894	0.64462				32.819	1.12182			70.347	2.40461				36.003	1.75018			16.105	0.782897
			10.113	0.94561			7.131	0.66678				18.485	0.631856			57.949	1.98082				40.142	1.95139			31.321	1.52258
			11.472	1.07268			7.968	0.745043				38.489	1.31563			43.489	1.48654				30.005	1.45861			31.647	1.53843
			14.464	1.35245			6.96	0.650791				25.565	0.873865			68.437	2.33932				20.606	1.0017			15.644	0.760487
			5.286	0.494264			6.14	0.574117				23.685	0.809602			76.686	2.62129				32.982	1.60332			22.616	1.09941
			11.514	1.07661			5.994	0.560466				25.862	0.884017			60.161	2.05643				18.302	0.889698			27.38	1.331
			8.549	0.799369			8.053	0.752991				9.715	0.332079			22.245	0.76038				42.574	2.06961			10.615	0.516017
			14.497	1.35553			8.761	0.819192				11.764	0.402118			58.238	1.9907				6.365	0.309416			15.868	0.771376
			14.224	1.33001			10.141	0.948229				29.349	1.00321			45.336	1.54968				37.306	1.81352			18.121	0.880899
			6.909	0.646022			3.538	0.330819				29.494	1.00817			48.525	1.65868				23.93	1.16329			36.998	1.79855
							9.31	0.870526				36.554	1.24949			33.906	1.15898				49.114	2.38753			35.625	1.73181
							8.225	0.769074				26.277	0.898202			68.237	2.33248				23.634	1.1489			9.878	0.48019
							6.631	0.620028				25.355	0.866686			65.714	2.24624				20.959	1.01886			20.946	1.01823
							8.886	0.83088				13.917	0.475712			71.598	2.44737				31.832	1.54742			24.003	1.16684
							8.947	0.836584				20.679	0.706851			42.191	1.44218				24.761	1.20368			15.025	0.730396
							14.248	1.33225				14.433	0.49335			60.121	2.05506				26.135	1.27048			18.823	0.915025
							12.279	1.14814				6.488	0.221773			35.341	1.20803				30.587	1.4869			13.339	0.648436
							5.592	0.522877				27.685	0.946331			63.084	2.15634				11.039	0.536629			15.808	0.76846
							7.01	0.655466				23.552	0.805056			66.457	2.27164				26.873	1.30635			24.393	1.18579
							7.627	0.713158				22.644	0.774019			43.097	1.47314				16.179	0.786495			32.104	1.56064
							9.168	0.857249				3.668	0.12538			60.473	2.06709				18.352	0.892129			24.784	1.2048
							7.239	0.676879				12.667	0.432984			55.448	1.89533				18.719	0.909969			20.243	0.984054
							25.151	2.35173				13.729	0.469286			50.285	1.71885				22.281	1.08313			16.907	0.821884
							4.478	0.418713				16.371	0.559595			68.681	2.34766				28.51	1.38593			23.962	1.16484
							8.239	0.770383				27.106	0.926539			60.328	2.06214				18.33	0.891059			17.058	0.829225
							6.742	0.630407				7.939	0.271371			92.808	3.17237				26.641	1.29507			16.776	0.815516
							5.684	0.531479				17.622	0.602356			66.914	2.28726				29.227	1.42079			16.945	0.823732
							6.304	0.589452				6.738	0.230319			49.832	1.70336				14.423	0.701132			32	1.55559
							6.596	0.616755				10.762	0.367867			37.08	1.26747				28.346	1.37796			10.704	0.520344
							8.125	0.759724				17.898	0.611791			48.484	1.65728				19.694	0.957366			31.578	1.53507
							7.847	0.733729				12.445	0.425396			31.504	1.07687				19.651	0.955276			16.449	0.79962
							8.285	0.774684				47.172	1.61244			19.267	0.658586				30.161	1.46619			13.025	0.633172
							4.293	0.401415				34.017	1.16277			26.389	0.902031				25.432	1.2363			40.519	1.96971
							5.217	0.487813				46.984	1.60601			53.772	1.83804				11.86	0.576539			44.876	2.18152
							7.744	0.724098				38.864	1.32845			49.017	1.6755				25.111	1.2207			44.444	2.16051
							7.506	0.701844				25.705	0.87865			10.764	0.367936				17.603	0.855718			22.261	1.08215
							5.104	0.477247				41.564	1.42074			51.317	1.75412				15.515	0.754216			15.212	0.739487
							5.204	0.486597				36.927	1.26224			40.606	1.388				18.457	0.897233			18.741	0.911039
							4.636	0.433487				3.883	0.132729			56.955	1.94684				9.735	0.473239			32.76	1.59253
							5.617	0.525214				25.153	0.859782			50.17	1.71491				13.223	0.642797			14.532	0.706431
							7.89	0.73775				43.64	1.49171			49.832	1.70336				8.317	0.404307			14.338	0.697
							3.977	0.371867				33.662	1.15064			31.507	1.07697				19.852	0.965047			10.626	0.516552
							4.207	0.393373				6.31	0.215689			60.751	2.07659				18.625	0.9054			30.402	1.4779
							4.691	0.438629				3.41	0.116561			18.573	0.634864				30.164	1.46633			6.881	0.3345
							4.737	0.442931				24.463	0.836196			70.476	2.40902				24.91	1.21093			32.717	1.59044
							9.925	0.928032				23.555	0.805159			47.678	1.62973				15.736	0.76496			30.66	1.49045
							5.927	0.554201				38.481	1.31536			43.731	1.49482				2.762	0.134267			19.009	0.924067
							7.766	0.726155				23.031	0.787247			43.881	1.49994				14.467	0.703271			28.966	1.4081
							10.767	1.00676				35.297	1.20652			42.87	1.46539				21.166	1.02892			8.446	0.410578
							11.16	1.04351				31.396	1.07318			64.855	2.21688				5.233	0.254387			25.772	1.25283
							9.449	0.883523				24.539	0.838794			25.495	0.871472				17.78	0.864323			4.643	0.225706
							5.822	0.544383				27.592	0.943152			63.302	2.16379				20.039	0.974137			29.142	1.41665
							6.084	0.568881				33.48	1.14442			28.107	0.960755				23.988	1.16611			27.289	1.32657
							9.259	0.865758				21.575	0.737478			70.574	2.41237				22.04	1.07141			24.567	1.19425
							14.095	1.31795				21.726	0.74264			68.583	2.34431				17.544	0.85285			12.432	0.604345
							5.739	0.536622				24.576	0.840059			65.396	2.23537				3.919	0.190511			39.056	1.89859
							5.278	0.493516				27.208	0.930026			53.223	1.81927				18.502	0.899421			24.409	1.18657
							20.043	1.87411				26.14	0.893519			51.166	1.74896				17.305	0.841232			21.139	1.02761
							6.277	0.586927				29.649	1.01346			48.317	1.65158				2.897	0.140829			24.457	1.18891
							10.776	1.0076				12.062	0.412304			51.044	1.74479				21.852	1.06227			44.352	2.15604
							8.266	0.772908				9.812	0.335394			58.351	1.99456				19.685	0.956929			23.321	1.13368
							10.807	1.0105				31.401	1.07335			64.841	2.2164				18.59	0.903698			20.816	1.01191
							10.879	1.01723				14.116	0.482514			42.198	1.44241				20.168	0.980408			40.182	1.95333
							6.364	0.595062				12.535	0.428472			23.831	0.814593				17.48	0.849739			41.959	2.03971
							6.709	0.627321				23.485	0.802766			76.196	2.60454				28.031	1.36264			17.26	0.839044
							7.949	0.743267				27.448	0.938229			18.684	0.638658				5.914	0.287492			12.766	0.620582
							8.305	0.776554				27.137	0.927599			41.321	1.41244				20.925	1.01721			26.602	1.29318
							13.995	1.30859				37.68	1.28798			47.134	1.61114				17.553	0.853288			47.215	2.29522
							5.986	0.559718				20.067	0.685932			41.112	1.40529				12.9	0.627096			12.203	0.593213
							10.105	0.944862				20.137	0.688324			65.136	2.22648				9.31	0.452578			26.112	1.26936
							8.068	0.754394				18.282	0.624917			45.782	1.56492				20.062	0.975255			9.08	0.441398
							13.444	1.25707				13.492	0.461184			47.943	1.63879				22.996	1.11788			25.925	1.26027
							5.318	0.497257				24.351	0.832368			46.818	1.60034				8.25	0.40105			28.54	1.38739
							10.512	0.982919				17.717	0.605604			41.431	1.4162				14.007	0.680909			54.394	2.6442
							9.693	0.906339				21.978	0.751254			70.386	2.40594				7.368	0.358174			18.697	0.9089
							10.314	0.964405				16.435	0.561782			39.075	1.33566				28.88	1.40392			10.82	0.525983
							8.321	0.77805				20.811	0.711363			27.416	0.937136				13.196	0.641485			4.916	0.238977
												24.024	0.82119			41.661	1.42406				23.725	1.15332			37.258	1.81119
												25.356	0.866721			43.296	1.47995				18.14	0.881823			45.188	2.19668
												18.238	0.623413			34.633	1.18383				33.982	1.65194			11.18	0.543483
												19.117	0.653459			35.996	1.23042				19.104	0.928685			29.284	1.42356
												21.856	0.747083			19.866	0.679061				24.821	1.2066			45.692	2.22118
												29.563	1.01052			56.105	1.91779				18.169	0.883233			16.969	0.824898
												30.774	1.05192			55.912	1.91119				7.56	0.367507			27.425	1.33319
												39.756	1.35894			53.495	1.82857				24.107	1.17189			15.904	0.773126
												12.287	0.419995			42.74	1.46094				15.95	0.775363			21.144	1.02785
												29.305	1.00171			43.941	1.50199				20.018	0.973116			15.594	0.758057
												6.915	0.236369			30.081	1.02823				22.263	1.08225			11.035	0.536434
												21.666	0.740589			13.283	0.45404				31.393	1.52608			8.888	0.432064
												13.444	0.459544			46.382	1.58543				17.624	0.856739			18	0.875017
												33.252	1.13662			31.939	1.09174				12.055	0.586019			61.728	3.00073
												16.549	0.565679			52.66	1.80003				31.92	1.5517			39.611	1.92557
												18.075	0.617841			35.215	1.20372				17.992	0.874628			4.57	0.222157
												16.691	0.570533			58.954	2.01517				21.841	1.06174			8.229	0.400029
												33.453	1.14349			40.338	1.37884				25.19	1.22454			20.683	1.00544
												21.008	0.718097			25.145	0.859508				27.625	1.34291			29.43	1.43065
												13.418	0.458655			56.848	1.94318				18.639	0.90608			25.203	1.22517
												19.229	0.657287			44.528	1.52206				12.595	0.612269			6.7	0.325701
												22.274	0.761371			44.818	1.53197				26.587	1.29245			10.711	0.520684
												32.44	1.10887			39.729	1.35802				11.372	0.552816			17.101	0.831315
												34.531	1.18034			53.894	1.84221				20.631	1.00292			23.162	1.12595
												14.111	0.482343			25.705	0.87865				14.285	0.694423			25.02	1.21627
												31.14	1.06443			41.307	1.41196				17.031	0.827912			25.781	1.25327
												28.977	0.990494			37.763	1.29082				21.328	1.0368			24.571	1.19445
												10.635	0.363526			46.186	1.57873				9.361	0.455058			27.008	1.31291
												28.022	0.95785			53.281	1.82125				13.466	0.65461			25.404	1.23494
												35.691	1.21999			77.907	2.66302				18.62	0.905157			28.493	1.3851
												25.045	0.85609			44.05	1.50572				21.542	1.0472			20.031	0.973748
												33.127	1.13235			59.157	2.02211				26.944	1.3098			21.339	1.03733
												14.416	0.492769			46.96	1.60519				7.094	0.344854			31.354	1.52418
												28.641	0.979009			28.803	0.984546				16.284	0.791599			26.261	1.2766
												25.012	0.854962			59.413	2.03086				32.954	1.60196			24.702	1.20082
												32.271	1.10309			58.594	2.00286				25.057	1.21807			23.059	1.12095
												28.546	0.975761			58.845	2.01144				4.996	0.242866			23.746	1.15434
												12.825	0.438385			39.606	1.35382				23.299	1.13261			26.774	1.30154
												25.752	0.880257			50.274	1.71847				39.626	1.9263			26.123	1.26989
												12.904	0.441085			61.985	2.11878				10.884	0.529094			31.795	1.54562
												41.502	1.41862			56.531	1.93235				20.409	0.992124			22.893	1.11288
												24.148	0.825429			61.899	2.11584				11.656	0.566622			28.953	1.40747
												48.752	1.66644			60.413	2.06504				6.124	0.2977			30.06	1.46128
												22.175	0.757987			56.895	1.94479				27.651	1.34417			34.764	1.68995
												40.169	1.37306			62.799	2.1466				18.419	0.895386			25.716	1.25011
												21.441	0.732898			41.544	1.42006				11.034	0.536386			36.81	1.78941
												14.421	0.49294			55.423	1.89447				20.36	0.989742			34.742	1.68888
												8.805	0.300973			55.574	1.89963				29.386	1.42851			27.735	1.34826
												10.342	0.353511			54.363	1.85824				16.441	0.799231			30.92	1.50309
												48.075	1.6433			61.433	2.09991				17.967	0.873413			33.292	1.61839
												38.313	1.30962			39.851	1.36219				19.043	0.92572			26.715	1.29867
												47.769	1.63284			61.121	2.08924				23.039	1.11997			19.727	0.95897
												40.288	1.37713			44.022	1.50476				16.557	0.80487			26.566	1.29143
												42.712	1.45998			46.604	1.59302				17.356	0.843711			8.236	0.400369
												44.301	1.5143			47.025	1.60741				29.004	1.40994			33.877	1.64683
												13.168	0.450109			48.381	1.65376				13.079	0.635797			26.186	1.27296
												46.195	1.57904			42.588	1.45575				12.863	0.625297			25.735	1.25103
												37.2	1.27157			24.925	0.851988				17.465	0.84901			18.733	0.91065
												35.891	1.22683			31.485	1.07622				19.089	0.927956			24.912	1.21102
												44.774	1.53047			38.655	1.32131				33.441	1.62564			25.154	1.22279
												19.731	0.674446			41.697	1.42529				19.802	0.962616			14.965	0.72748
												11.946	0.408339			37.091	1.26785				16.785	0.815954			23.386	1.13684
												12.192	0.416748			49.575	1.69458				17.072	0.829905			26.044	1.26605
												33.135	1.13262			43.258	1.47865				29.796	1.44845			22.334	1.0857
												29.576	1.01097			53.705	1.83575				28.492	1.38506			21.122	1.02678
												16.916	0.578224			38.092	1.30206				36.528	1.7757			35.482	1.72485
												21.835	0.746366			47.63	1.62809				22.743	1.10558			36.024	1.7512
												7.521	0.257083			49.895	1.70551				18	0.875017			26.971	1.31112
												25.519	0.872292			48.137	1.64542				29.248	1.42181			30.907	1.50245
												7.317	0.25011			40.477	1.38359				27.161	1.32035			25.294	1.22959
												35.478	1.21271			43.68	1.49307				11.371	0.552768			11.862	0.576636
												35.141	1.20119			14.931	0.510372				19.187	0.93272			36.755	1.78674
												29.199	0.998082			44.12	1.50811				3.854	0.187351			39.791	1.93432
												37.73	1.28969			52.965	1.81045				24.567	1.19425			41.531	2.01891
												29.816	1.01917			54.165	1.85147				2.636	0.128141			31.105	1.51208
												42.838	1.46429			53.022	1.8124				33.654	1.63599			8.895	0.432404
												28.143	0.961986			43.266	1.47892				12.699	0.617325			21.147	1.028
												29.845	1.02016			38.847	1.32787				21.675	1.05367			23.478	1.14131
												36.904	1.26146			59.469	2.03277				12.885	0.626367			14.778	0.718389
												23.288	0.796032			63.972	2.1867				26.513	1.28885			10.471	0.509017
												47.777	1.63312			65.983	2.25544				21.03	1.02231			9.895	0.481016
												59.909	2.04781			62.378	2.13221				28.613	1.39094			35.878	1.7441
												6.27	0.214322			49.945	1.70722				18.874	0.917504			26.795	1.30256
												29.655	1.01367			47.354	1.61866				3.271	0.15901			4.477	0.217636
												37.851	1.29383			34.044	1.16369				5.917	0.287638			21.291	1.035
												14.194	0.48518			36.692	1.25421				11.246	0.546691			28.597	1.39016
												33.041	1.12941			29.302	1.0016				6.375	0.309902			32.474	1.57863
												36.505	1.24782			47.907	1.63756				15.084	0.733264			8.772	0.426425
												34.208	1.1693			57.173	1.95429				5.037	0.244859			33.907	1.64829
												25.908	0.885589			67.197	2.29693				9.53	0.463273			8.06	0.391813
												17.965	0.614081			26.393	0.902167				14.021	0.68159			24.925	1.21166
												17.137	0.585778			33.249	1.13652				23.652	1.14977			16.58	0.805988
												19.517	0.667131			58.005	1.98273				4.719	0.2294			27.012	1.31311
												10.334	0.353238			45.439	1.5532				9.388	0.45637			28.764	1.39828
												32.381	1.10685			52.72	1.80208				31.918	1.5516			30.011	1.4589
												8.424	0.28795			44.086	1.50695				1.844	0.0896407			25.647	1.24675
												3.286	0.112322			26.9	0.919498				18.613	0.904816			26.811	1.30334
												51.791	1.77032			15.066	0.514987				24.742	1.20276			27.264	1.32536
												17.417	0.595349			53.041	1.81305				2.766	0.134461			13.585	0.660395
												15.704	0.536795			69.262	2.36752				4.174	0.202907			37.522	1.82402
												22.174	0.757953			32.427	1.10842				21.984	1.06869			2.118	0.10296
												18.278	0.62478			60.558	2.07				8.185	0.39789			21.092	1.02533
												18.707	0.639444			64.692	2.21131				18.248	0.887073			23.411	1.13806
												38.233	1.30688			38.374	1.3117				24.047	1.16897			33.307	1.61912
												28.591	0.9773			31.991	1.09352				3.909	0.190025			14.53	0.706333
												26.767	0.914951			65.801	2.24921				35.852	1.74284			16.388	0.796655
												42.385	1.44881			61.603	2.10572				20.807	1.01147			5.701	0.277137
												35.447	1.21165			54.034	1.84699				11.312	0.5499			34.202	1.66263
												32.83	1.1222			39.448	1.34841				25.942	1.26109			49.334	2.39823
												27.123	0.92712			29.633	1.01292				2.887	0.140343			34.975	1.70021
												29.413	1.0054			19.256	0.65821				3.951	0.192066			19.077	0.927372
												17.501	0.59822			42.872	1.46545				21.61	1.05051			27.347	1.32939
												27.705	0.947014			41.457	1.41709				6.314	0.306937			32.523	1.58101
												11.005	0.376174			56.286	1.92397				24.217	1.17724			13.713	0.666617
												22.66	0.774566			49.618	1.69605				9.249	0.449613			33.094	1.60877
												26.207	0.89581			15.882	0.54288				20.53	0.998006			27.881	1.35535
												30.993	1.0594			74.215	2.53682				17.941	0.872149			12.155	0.59088
												36.58	1.25038			16.188	0.553339				26.617	1.29391			40.865	1.98653
												20.466	0.69957			57.804	1.97586				25.088	1.21958			18.688	0.908462
												11.26	0.38489			50.891	1.73956				17.45	0.848281			11.838	0.57547
												8.19	0.279951			47.6	1.62707				13.551	0.658742			20.707	1.00661
												18.493	0.632129			39.023	1.33389				20.505	0.996791			15.962	0.775946
												47.098	1.60991			20.811	0.711363				36.269	1.76311			17.269	0.839482
												8.959	0.306237			51.273	1.75262				21.326	1.0367			10.487	0.509795
												22.163	0.757577			52.525	1.79541				26.992	1.31214			31.722	1.54207
												19.311	0.66009			62.188	2.12571				24.018	1.16756			26.905	1.30791
												7.358	0.251512			27.911	0.954056				19.024	0.924796			25.608	1.24486
												40.029	1.36827			32.313	1.10453				28.088	1.36542			5.322	0.258713
												6.869	0.234797			71.726	2.45174				23.241	1.12979			20.198	0.981867
												17.571	0.600613			39.616	1.35416				10.277	0.499586			27.486	1.33615
												33.43	1.14271			61.559	2.10421				12.485	0.606922			6.119	0.297457
												10.08	0.344555			42.594	1.45595				23.53	1.14384			32.462	1.57805
												12.821	0.438248			62.185	2.12561				8.096	0.393563			4.296	0.208837
												15.436	0.527634			76.591	2.61804				23.398	1.13743			15.492	0.753098
												22.249	0.760517			81.24	2.77695				9.759	0.474405			3.679	0.178844
												18.638	0.637085			44.594	1.52432				26.254	1.27626			12.931	0.628603
												29.03	0.992305			62.257	2.12807				6.01	0.292159			16.393	0.796898
												21.998	0.751937			72.793	2.48822				22.237	1.08099			29.418	1.43007
												25.943	0.886785			33.708	1.15221				13.624	0.662291			21.547	1.04744
												7.234	0.247273			33.166	1.13368				27.623	1.34281			16.603	0.807106
												3.816	0.130439			59.187	2.02313				4.127	0.200622			7.576	0.368285
												40.444	1.38246			82.747	2.82846				18.662	0.907198			8.474	0.411939
												34.151	1.16735			31.498	1.07667				4.153	0.201886			18.965	0.921928
												25.972	0.887777			57.716	1.97285				23.804	1.15716			41.046	1.99533
												13.813	0.472157			62.893	2.14981				2.203	0.107092			14.868	0.722764
												60.601	2.07147			60.667	2.07372				19.891	0.966943			43.083	2.09435
												29.906	1.02225			80.152	2.73976				31.293	1.52122			28.623	1.39142
												31.709	1.08388			58.461	1.99832				23.519	1.14331			11.817	0.574449
												41.161	1.40697			54.929	1.87759				16.278	0.791307			30.991	1.50654
												22.783	0.77877			64.322	2.19866				24.993	1.21496			19.691	0.95722
												28.016	0.957645			71.132	2.43144				17.423	0.846968			24.982	1.21443
												34.091	1.1653			73.94	2.52742				11.323	0.550434			20.398	0.991589
												31.002	1.05971			57.88	1.97846				24.033	1.16829			20.789	1.0106
												46.865	1.60194			74.777	2.55603				8.464	0.411453			9.294	0.451801
												17.105	0.584684			55.132	1.88453				24.404	1.18633			10.225	0.497058
												28.666	0.979863			43.523	1.48771				7.783	0.378348			18.751	0.911525
												43.327	1.48101			71.572	2.44648				9.355	0.454766			26.585	1.29235
												24.125	0.824642			46.615	1.5934				7.097	0.345			11.225	0.54567
												37.175	1.27072			61.971	2.1183				40.178	1.95314			16.962	0.824558
												49.958	1.70767			55.91	1.91112				13.987	0.679937			27.497	1.33669
												39.504	1.35033			69.869	2.38827				11.998	0.583248			16.816	0.817461
												27.633	0.944553			65.76	2.24781				33.772	1.64173			9.559	0.464683
												48.089	1.64378			19.978	0.682889				58.468	2.84225
												29.981	1.02481			19.584	0.669422				17.658	0.858392
												12.857	0.439479			32.006	1.09403				17.64	0.857517
												35.422	1.2108			25.546	0.873215				41.88	2.03587
												28.305	0.967523			37.199	1.27154				38.667	1.87968
												21.21	0.725002			26.472	0.904868				25.076	1.219
												21.174	0.723771			22.399	0.765644				29.399	1.42915
												41.189	1.40793			5.126	0.175217				23.695	1.15186
												16.122	0.551083			14.946	0.510885				30.268	1.47139
												32.926	1.12548			21.577	0.737547				26.213	1.27427
												25.762	0.880598			18.32	0.626216				31.747	1.54329
												44.687	1.52749			39.294	1.34315				5.47	0.265908
												20.176	0.689657			37.679	1.28795				11.039	0.536629
												15.143	0.517619			22.73	0.776958				4.627	0.224928
												48.357	1.65294			41.11	1.40522				31.483	1.53045
												30.523	1.04334			36.962	1.26344				17.573	0.85426
												12.377	0.423071			32.589	1.11396				23.973	1.16538
												17.17	0.586906			14.185	0.484873				17.048	0.828739
												52.499	1.79452			27.32	0.933854				1.778	0.0864323
												40.377	1.38017			21.904	0.748724				1.935	0.0940644
												11.75	0.401639			40.182	1.3735				27.052	1.31505
												31.299	1.06986			18.33	0.626557				7.941	0.386028
												42.287	1.44546			30.374	1.03825				3.149	0.153079
												33.258	1.13683			20.263	0.692631				19.097	0.928345
												50.265	1.71816			21.094	0.721037				38.423	1.86782
												39.114	1.337			13.434	0.459202				16.625	0.808176
												19.435	0.664329			24.328	0.831581				21.145	1.0279
												15.038	0.51403			36.759	1.2565				24.407	1.18647
												24.146	0.82536			30.561	1.04464				51.026	2.48048
												23.878	0.816199			40.622	1.38854				21.716	1.05566
												49.964	1.70787			13.3	0.454622				32.46	1.57795
												28.859	0.98646			40.595	1.38762				23.517	1.14321
												7.776	0.2658			22.832	0.780445				15.399	0.748577
												13.071	0.446794			42.335	1.4471				44.419	2.1593
												11.434	0.390838			14.908	0.509586				37.906	1.84269
												30.509	1.04286			16.427	0.561509				31.648	1.53847
												40.7	1.39121			33.734	1.1531				50.526	2.45617
												24.943	0.852603			32.762	1.11987				30.201	1.46813
												29.974	1.02457			32.34	1.10545				13.205	0.641922
												18.44	0.630317			39.875	1.36301				29.276	1.42317
												34.843	1.19101			34.287	1.172				7.035	0.341986
												22.333	0.763388			45.081	1.54096				10.168	0.494288
												7.12	0.243376			14.521	0.496358				17.503	0.850857
												30.573	1.04505			26.492	0.905551				11.642	0.565942
												40.554	1.38622			23.311	0.796818				9.665	0.469836
												12.751	0.435856			32.943	1.12606				4.161	0.202275
												29.751	1.01695			38.615	1.31994				8.771	0.426376
												31.061	1.06173			42.578	1.4554				14.993	0.728841
												38.339	1.31051			32.597	1.11423				27.21	1.32273
												28.232	0.965028			19.988	0.683231				20.984	1.02008
												20.673	0.706646			23.008	0.786461				20.871	1.01458
												53.825	1.83985			32.511	1.11129				17.924	0.871323
												54.372	1.85855			40.349	1.37921				27.031	1.31403
												94.83	3.24149			35.253	1.20502				14.259	0.69316
												90.579	3.09618			21.615	0.738845				20.718	1.00714
												32.512	1.11133			23.19	0.792682				16.655	0.809634
												35.518	1.21408			16.33	0.558193				16.765	0.814981
												11.462	0.391795			12.284	0.419893				13.481	0.655339
												24.918	0.851749			39.936	1.3651				20.523	0.997666
												8.62	0.294649			24.645	0.842417				27.064	1.31564
												19.787	0.676361			33.631	1.14958				23.054	1.1207
												13.457	0.459988			7.003	0.239377				19.964	0.970491
												27.825	0.951116			12.539	0.428609				32.658	1.58757
												42.367	1.44819			36.1	1.23397				6.235	0.303096
												33.666	1.15077			11.416	0.390223				19.479	0.946915
												102.604	3.50722			9.231	0.315535				25.867	1.25745
												43.817	1.49776			18.298	0.625464				13.399	0.651353
												21.453	0.733308			10.431	0.356553				10.592	0.514899
												45.518	1.5559			38.938	1.33098				17.418	0.846725
												42.64	1.45752			41.691	1.42508				14.172	0.68893
												29.66	1.01384			47.395	1.62006				15.081	0.733119
												39.175	1.33908			26.429	0.903398				6.895	0.33518
												48.479	1.65711			54.866	1.87543				16.407	0.797578
												13.214	0.451682			61.332	2.09645				14.929	0.72573
												58.775	2.00905			52.497	1.79446				17.326	0.842253
												29.008	0.991553			19.349	0.661389				15.748	0.765543
												51.475	1.75952			28.975	0.990425				20.022	0.973311
												36.767	1.25677			36.589	1.25069				10.494	0.510135
												46.305	1.5828			56.378	1.92712				14.772	0.718098
												35.714	1.22078			49.285	1.68466				21.546	1.0474
												23.493	0.803039			15.839	0.54141				12.066	0.586553
												49.77	1.70124			69.961	2.39141				19.06	0.926546
												59.387	2.02997			54.154	1.8511				21.272	1.03408
												41.953	1.43404			34.361	1.17453				20.224	0.983131
												37.473	1.2809			37.816	1.29263				25.394	1.23445
												41.319	1.41237			8.123	0.277661				10.813	0.525642
												49.741	1.70025			19.416	0.663679				6.854	0.333187
												53.534	1.8299			24.512	0.837871				24.758	1.20354
												37.387	1.27797			27.836	0.951492				23.157	1.12571
												11.406	0.389881			26.047	0.89034				19.038	0.925477
												8.822	0.301554			15.674	0.53577				13.82	0.671819
												60.273	2.06026			50.496	1.72606				24.64	1.1978
												43.707	1.494			45.171	1.54404				31.285	1.52083
												52.895	1.80806			23.299	0.796408				25.599	1.24442
												41.468	1.41746			48.559	1.65985				13.19	0.641193
												34.888	1.19254			31.24	1.06785				16.34	0.794321
												14.753	0.504288			12.486	0.426797
												23.619	0.807346			42.404	1.44946
												48.35	1.6527			53.192	1.81821
												19.689	0.673011			20.121	0.687777
												30.794	1.0526			19.693	0.673148
												25.698	0.878411			14.523	0.496426
												31.304	1.07004			13.854	0.473558
												33.669	1.15088			41.102	1.40495
												48.165	1.64638			37.82	1.29277
												36.028	1.23151			28.783	0.983863
												42.812	1.4634			40.493	1.38413
												44.504	1.52124			18.054	0.617123
												40.998	1.4014			52.057	1.77942
												49.326	1.68606			39.485	1.34968
												47.241	1.6148			11.366	0.388513
												53.428	1.82628			24.427	0.834965
												33.828	1.15631			8.955	0.3061
												36.805	1.25807			12.818	0.438146
												42.942	1.46785			36.461	1.24631
												40.506	1.38458			22.27	0.761235
												34.349	1.17412			19.144	0.654382
												23.032	0.787281			16.993	0.580856
												16.379	0.559868			34.121	1.16633
												32.597	1.11423			8.022	0.274209
												45.439	1.5532			36.854	1.25975
												22.618	0.77313			48.447	1.65602
												43.166	1.4755			42.132	1.44016
												36.436	1.24546			25.506	0.871848
												34.811	1.18991			23.888	0.816541
												39.562	1.35231			36.243	1.23886
												16.162	0.552451			26.618	0.909858
												42.749	1.46125			20.959	0.716422
												21.323	0.728864			28.009	0.957406
												26.46	0.904458			12.715	0.434625
												40.823	1.39541			30.091	1.02857
												47.683	1.6299			12.611	0.43107
												6.844	0.233942			50.945	1.74141
												28.675	0.980171			31.355	1.07178
												37.053	1.26655			41.987	1.4352
												24.018	0.820985			41.787	1.42837
												34.643	1.18417			32.591	1.11403
												36.378	1.24348			22.796	0.779214
												47.948	1.63896			23.993	0.82013
												34.394	1.17566			31.718	1.08419
												41.509	1.41886			27.593	0.943186
												47.343	1.61828			23.074	0.788717
												53.669	1.83452			40.789	1.39425
												39.989	1.36691			51.43	1.75798
												35.81	1.22406			31.142	1.0645
												39.309	1.34366			53.236	1.81972
												36.435	1.24542			38.293	1.30893
												47.778	1.63315			17.658	0.603587
												46.665	1.59511			40.934	1.39921
												31.326	1.07079			55.284	1.88972
												30.934	1.05739			34.753	1.18793
												40.679	1.39049			42.959	1.46843
												39.339	1.34469			12.758	0.436095
												52.935	1.80943			32.141	1.09865
												49.048	1.67656			60.219	2.05841
												45.657	1.56065			32.816	1.12172
												34.265	1.17125			34.363	1.1746
												40.274	1.37665			41.118	1.4055
												31.93	1.09143			48.479	1.65711
												29.702	1.01528			19.371	0.662141
												32.391	1.10719			28.031	0.958158
												49.303	1.68528			38.931	1.33074
												58.976	2.01592			45.165	1.54383
												32.687	1.11731			39.291	1.34305
												41.485	1.41804			52.455	1.79302
												28.345	0.968891			26.425	0.903261
												40.693	1.39097			65.329	2.23308
												36.031	1.23161			28.034	0.95826
												49.018	1.67554			25.696	0.878342
												40.253	1.37593			11.503	0.393196
												45.088	1.5412			27.317	0.933752
												35.211	1.20358			27.489	0.939631
												31.135	1.06426			25.466	0.870481
												28.988	0.99087			53.426	1.82621
												20.826	0.711876			47.528	1.62461
												35.045	1.19791			36.152	1.23575
																44.43	1.51871
																14.027	0.479472
																32.52	1.1116
																48.634	1.66241
																4.374	0.149512
																23.388	0.79945
																44.04	1.50538
																48.175	1.64672
																64.598	2.20809
																75.951	2.59616
																66.022	2.25677
																41.796	1.42867
																32.67	1.11673
																51.076	1.74588
																44.645	1.52606
																58.766	2.00874
																48.591	1.66094
																56.036	1.91543
																32.565	1.11314
																51.721	1.76793
																46.836	1.60095
																45.753	1.56393
																53.695	1.83541
																67.91	2.3213
																42.598	1.45609
																56.125	1.91847
																64.267	2.19678
																72.356	2.47328
																67.687	2.31368
																88.062	3.01014
																90.08	3.07912
																92.232	3.15268
																67.857	2.31949
																49.741	1.70025
																62.408	2.13323
																32.504	1.11105
																52.924	1.80905
																47.324	1.61763
																12.863	0.439684
																60.9	2.08169
																58.65	2.00478
																66.32	2.26695
																54.925	1.87745
																52.149	1.78256
																48.425	1.65527
																65.721	2.24648
																64.081	2.19042
																34.049	1.16387
																62.65	2.14151
																32.088	1.09683
																46.798	1.59965
																56.323	1.92524
																62.72	2.1439
																42.87	1.46539
																56.774	1.94065
																16.622	0.568174
																35.607	1.21712
																35.849	1.22539
																61.151	2.09027
																66.89	2.28644
																2.687	0.0918472
																90.648	3.09854
																41.548	1.4202
																58.724	2.00731
																55.047	1.88162
																44.693	1.5277
																49.384	1.68805
																47.667	1.62936
																61.055	2.08699
																59.747	2.04228
																49.325	1.68603
																46.86	1.60177
																63.902	2.1843
																63.636	2.17521
																72.345	2.4729
																63.712	2.17781
																63.421	2.16786
																80.764	2.76068
																55.311	1.89064
																60.038	2.05222
																63.127	2.15781
																51.561	1.76246
																34.242	1.17046
																42.868	1.46532
																60.931	2.08275
																27.571	0.942434
																32.62	1.11502
																31.591	1.07985
																50.65	1.73132
																40.21	1.37446
																53.126	1.81596
																11.507	0.393333
																32.056	1.09574
																28.911	0.988238
																29.822	1.01938
																25.511	0.872019
																36.413	1.24467
																15.396	0.526267
																36.91	1.26166
																27.675	0.945989
																39.089	1.33614
																37.062	1.26686
																39.137	1.33778
																33.219	1.13549
																35.652	1.21866
																31.142	1.0645
																31.401	1.07335
																35.666	1.21914
																40.098	1.37063
																30.911	1.0566
																33.256	1.13676
																16.358	0.55915
																38.813	1.32671
																14.768	0.504801
																26.15	0.893861
																38.645	1.32097
																36.933	1.26245
																38.689	1.32247
																39.456	1.34869
																30.448	1.04078
																29.598	1.01172
																47.361	1.6189
																43.592	1.49006
																38.822	1.32702
																35.677	1.21951
																29.916	1.02259
																21.604	0.738469
																27.235	0.930949
																42.896	1.46627
																32.138	1.09854
																21.31	0.72842
																26.645	0.910781
																43.496	1.48678
																19.18	0.655612
																27.017	0.923497
																25	0.854552
																17.232	0.589025
																29.455	1.00683
																28.751	0.982769
																42.097	1.43896
																37.028	1.26569
																20.26	0.692529
																34.957	1.1949
																29.428	1.00591
																30.974	1.05876
																34.91	1.1933
																38.641	1.32083
																32.891	1.12428
																32.786	1.12069
																41.395	1.41497
																39.085	1.33601
																32.657	1.11628
																50.671	1.73204
																31.839	1.08832
																31.309	1.07021
																41.116	1.40543
																45.638	1.56
																24.529	0.838452
																53.183	1.81791
																47.563	1.6258
																35.649	1.21856
																39.575	1.35276
																44.718	1.52855
																57.219	1.95586
																62.14	2.12407
																53.638	1.83346
																16.844	0.575763
																39.247	1.34154
																47.511	1.62402
																34.412	1.17627
																37.979	1.2982
																44.919	1.53542
																24.659	0.842896
																24.543	0.838931
																27.418	0.937204
																42.58	1.45547
																33.949	1.16045
																44.044	1.50552
																32.607	1.11457
																25.404	0.868361
																13.252	0.452981
																50.61	1.72995
																43.373	1.48258
																26.062	0.890853
																39.423	1.34756
																41.516	1.4191
																43.744	1.49526
																39.324	1.34418
																39.668	1.35593
																41.59	1.42163
																52.154	1.78273
																16.329	0.558159
																40.346	1.37911
																34.185	1.16851
																36.645	1.2526
																22.818	0.779966
																52.788	1.8044
																30.606	1.04618
																59.68	2.03999
																57.22	1.9559
																55.771	1.90637
																43.816	1.49772
																45.092	1.54134
																37.052	1.26651
																37.991	1.29861
																48.155	1.64604
																55.398	1.89362
																39.51	1.35053
																33.355	1.14014
																35.567	1.21575
																20.751	0.709312
																17.095	0.584342
																26.145	0.89369
																41.443	1.41661
																55.514	1.89758
																33.045	1.12955
																54.222	1.85342
																47.14	1.61134
																43.818	1.49779
																54.841	1.87458
																38.195	1.30558
																34.261	1.17111
																22.9	0.782769
																27.738	0.948142
																50.318	1.71997
																36.237	1.23866
																31.698	1.0835
																56.242	1.92247
																23.494	0.803074
																53.949	1.84409
																31.911	1.09078
																31.33	1.07092
																62.982	2.15286
																45.425	1.55272
																29.107	0.994938
																46.881	1.60249
																46.723	1.59709
																28.399	0.970737
																35.095	1.19962
																29.767	1.0175
																48.731	1.66573
																45.313	1.54889
																24.395	0.833872
																25.503	0.871745
																24.283	0.830043
																34.887	1.19251
																30.869	1.05517
																40.838	1.39593
																52.742	1.80283
																44.853	1.53317
																60.113	2.05479
																29.952	1.02382
																19.238	0.657595
																60.048	2.05256
																71.801	2.45431
																34.032	1.16328
																52.087	1.78044
																31.603	1.08026
																40.871	1.39706
																54.638	1.86764
																20.59	0.703809
																12.545	0.428814
																34.552	1.18106
												29.2551	1

## Sheet: F5S1G
Morphology analysis of hESCs cultured with YSLCs in 3D
Disorganised= no lumen present, squamous= average sturcture aspect ratio </= 1, columnar= average aspect ratio of the sturcture >1
Control																						+ YSLCs
Exp 1 (n=9)							Exp 2 (n=9)							Exp 3 (n=16)								Exp 1 (n=9)							Exp 2 (n=11)							Exp 3 (n=9)
Sturcture number	Cell measurement	ROI length (a.u.)	Aspect ratio (heigh/width) (a.u.)	Average aspect ratio of four random cells wthin the sturctre (a.u)	Type of sturcture		Sturcture number	Cell measurement	ROI length (a.u.)	Aspect ratio (heigh/width) (a.u.)	Average aspect ratio of four random cells wthin the sturctre (a.u)	Type of sturcture		Sturcture number	Cell measurement	ROI length (a.u.)	Aspect ratio (heigh/width) (a.u.)	Average aspect ratio of four random cells wthin the sturctre (a.u)	Type of sturcture			Sturcture number	Cell measurement	ROI length (a.u.)	Aspect ratio (heigh/width) (a.u.)	Average aspect ratio of four random cells wthin the sturctre (a.u)	Type of sturcture		Sturcture number	Cell measurement	ROI length (a.u.)	Aspect ratio (heigh/width) (a.u.)	Average aspect ratio of four random cells wthin the sturctre (a.u)	Type of sturcture		Sturcture number	Cell measurement	ROI length (a.u.)	Aspect ratio (heigh/width) (a.u.)	Average aspect ratio of four random cells wthin the sturctre (a.u)	Type of sturcture
1	Height (h)	N/A	N/A	N/A	Disorganised		1	Height (h)	N/A	N/A	N/A	Disorganised		1	Height (h)	11.485	0.934652	0.743349	Squamous			1	Height (h)	14.615	0.8782	0.739484	Squamous		1	Height (h)	10.629	0.82166	0.9128	Squamous		1	Height (h)	N/A	N/A	N/A	Disogranised			EXP1	Control (9)	%	+YSLC (9)	%
	Width (w)	N/A	N/A	N/A				Width (w)	N/A	N/A	N/A				Width (w)	12.288							Width (w)	16.642						Width (w)	12.936						Width (w)	N/A	N/A	N/A
	h	N/A	N/A	N/A				h	N/A	N/A	N/A				h	10.513	0.782741						h	10.289	0.765551					h	11.993	1.30161					h	N/A	N/A	N/A				Disorganised	9	1	3	0.333333
	w	N/A	N/A	N/A				w	N/A	N/A	N/A				w	13.431							w	13.44						w	9.214						w	N/A	N/A	N/A				Organised (mainly squamous cells)	0	0	4	0.444444
	h	N/A	N/A	N/A				h	N/A	N/A	N/A				h	11.028	0.740134						h	13.541	0.654471					h	10.606	0.685585					h	N/A	N/A	N/A				Organised (mainly columnar cells)	0	0	2	0.222222
	w	N/A	N/A	N/A				w	N/A	N/A	N/A				w	14.9							w	20.69						w	15.47						w	N/A	N/A	N/A					9		9
	h	N/A	N/A	N/A				h	N/A	N/A	N/A				h	11.8	0.51587						h	11.543	0.659713					h	12.551	0.842349					h	N/A	N/A	N/A
	w	N/A	N/A	N/A				w	N/A	N/A	N/A				w	22.874							w	17.497						w	14.9						w	N/A	N/A	N/A
2	h	N/A	N/A	N/A	Disorganised		2	h	N/A	N/A	N/A	Disorganised		2	h	13.364	0.527679	0.480396	Squamous			2	h	10.633	0.964182	0.740234	Squamous		2	h	16.487	1.29037	1.22992	Columnar		2	h	20.215	2.77717	1.76738	Columnar			EXP2	Control (9)	%	+YSLC (11)	%
	w	N/A	N/A	N/A				w	N/A	N/A	N/A				w	25.326							w	11.028						w	12.777						w	7.279
	h	N/A	N/A	N/A				h	N/A	N/A	N/A				h	10.101	0.383485						h	11.593	0.670697					h	13.455	0.708382					h	18.207	1.12389					Disorganised	9	1	2	0.181818
	w	N/A	N/A	N/A				w	N/A	N/A	N/A				w	26.34							w	17.285						w	18.994						w	16.2						Organised (mainly squamous cells)	0	0	6	0.545455
	h	N/A	N/A	N/A				h	N/A	N/A	N/A				h	10.675	0.345134						h	5.067	0.249103					h	13.743	0.850065					h	15.296	1.20555					Organised (mainly columnar cells)	0	0	3	0.272727
	w	N/A	N/A	N/A				w	N/A	N/A	N/A				w	30.93							w	20.341						w	16.167						w	12.688							9		11
	h	N/A	N/A	N/A				h	N/A	N/A	N/A				h	14.438	0.665284						h	10.216	1.07696					h	15.428	2.07087					h	22.768	1.96293
	w	N/A	N/A	N/A				w	N/A	N/A	N/A				w	21.702							w	9.486						w	7.45						w	11.599
3	h	N/A	N/A	N/A	Disorganised		3	h	N/A	N/A	N/A	Disorganised		3	h	11.988	0.67538	0.630045	Squamous			3	h	15.247	0.925688	1.36109	Columnar		3	h	7.879	0.628711	0.885252	Squamous		3	h	5.455	0.32145	0.426992	Squamous			EXP3	Control (16)	%	+YSLC (9)	%
	w	N/A	N/A	N/A				w	N/A	N/A	N/A				w	17.75							w	16.471						w	12.532						w	16.97
	h	N/A	N/A	N/A				h	N/A	N/A	N/A				h	14.008	0.973657						h	15.681	1.6238					h	12.447	0.906885					h	7.666	0.321979					Disorganised	0	0	3	0.272727
	w	N/A	N/A	N/A				w	N/A	N/A	N/A				w	14.387							w	9.657						w	13.725						w	23.809						Organised (mainly squamous cells)	11	1.22222	3	0.272727
	h	N/A	N/A	N/A				h	N/A	N/A	N/A				h	11.745	0.487203						h	13.235	1.04041					h	19.499	1.11512					h	8.725	0.617655					Organised (mainly columnar cells)	5	0.555556	2	0.181818
	w	N/A	N/A	N/A				w	N/A	N/A	N/A				w	24.107							w	12.721						w	17.486						w	14.126							16		8
	h	N/A	N/A	N/A				h	N/A	N/A	N/A				h	9.372	0.383941						h	15.65	1.85449					h	13.82	0.890292					h	7.879	0.446883
	w	N/A	N/A	N/A				w	N/A	N/A	N/A				w	24.41							w	8.439						w	15.523						w	17.631
4	h	N/A	N/A	N/A	Disorganised		4	h	N/A	N/A	N/A	Disorganised		4	h	11.028	0.802795	0.960758	Squamous			4	h	16.409	1.50087	1.22627	Columnar		4	h	N/A	N/A	N/A	Disorganised		4	h	10.909	0.571421	0.758713	Squamous			Total:	Control (34)	%	+YSLC (28)	%
	w	N/A	N/A	N/A				w	N/A	N/A	N/A				w	13.737							w	10.933						w	N/A	N/A	N/A				w	19.091
	h	N/A	N/A	N/A				h	N/A	N/A	N/A				h	13.358	1.10205						h	16.087	1.48254					h	N/A	N/A	N/A				h	14.008	0.919945					Disorganised	18	0.529412	8	0.285714
	w	N/A	N/A	N/A				w	N/A	N/A	N/A				w	12.121							w	10.851						w	N/A	N/A	N/A				w	15.227						Organised (mainly squamous cells)	11	0.323529	13	0.464286
	h	N/A	N/A	N/A				h	N/A	N/A	N/A				h	16.742	1.12362						h	16.972	1.25061					h	N/A	N/A	N/A				h	9.491	0.593484					Organised (mainly columnar cells)	5	0.147059	7	0.25
	w	N/A	N/A	N/A				w	N/A	N/A	N/A				w	14.9							w	13.571						w	N/A	N/A	N/A				w	15.992							34		28
	h	N/A	N/A	N/A				h	N/A	N/A	N/A				h	12.532	0.81456						h	13.62	0.671068					h	N/A	N/A	N/A				h	13.034	0.95					As Percentages:		52.9412		28.5714
	w	N/A	N/A	N/A				w	N/A	N/A	N/A				w	15.385							w	20.296						w	N/A	N/A	N/A				w	13.72								32.3529		46.4286
5	h	N/A	N/A	N/A	Disorganised		5	h	N/A	N/A	N/A	Disorganised		5	h	19.398	1.21048	1.04093	Squamous			5	h	13.875	0.577884	0.811269	Squamous		5	h	N/A	N/A	N/A	Disorganised		5	h	N/A	N/A	N/A	Disogranised					14.7059		25
	w	N/A	N/A	N/A				w	N/A	N/A	N/A				w	16.025							w	24.01						w	N/A	N/A	N/A				w	N/A	N/A	N/A
	h	N/A	N/A	N/A				h	N/A	N/A	N/A				h	9.467	0.498421						h	14.458	1.25809					h	N/A	N/A	N/A				h	N/A	N/A	N/A
	w	N/A	N/A	N/A				w	N/A	N/A	N/A				w	18.994							w	11.492						w	N/A	N/A	N/A				w	N/A	N/A	N/A
	h	N/A	N/A	N/A				h	N/A	N/A	N/A				h	14.279	1.89981						h	14.331	0.664241					h	N/A	N/A	N/A				h	N/A	N/A	N/A
	w	N/A	N/A	N/A				w	N/A	N/A	N/A				w	7.516							w	21.575						w	N/A	N/A	N/A				w	N/A	N/A	N/A
	h	N/A	N/A	N/A				h	N/A	N/A	N/A				h	10.857	0.555005						h	12.028	0.74486					h	N/A	N/A	N/A				h	N/A	N/A	N/A
	w	N/A	N/A	N/A				w	N/A	N/A	N/A				w	19.562							w	16.148						w	N/A	N/A	N/A				w	N/A	N/A	N/A
6	h	N/A	N/A	N/A	Disorganised		6	h	N/A	N/A	N/A	Disorganised		6	h	19.041	1.16373	1.0622	Columnar			6	h	N/A	N/A	N/A	Disorganised		6	h	14.596	0.673962	0.776611	Squamous		6	h	N/A	N/A	N/A
	w	N/A	N/A	N/A				w	N/A	N/A	N/A				w	16.362							w	N/A	N/A	N/A				w	21.657						w	N/A	N/A	N/A
	h	N/A	N/A	N/A				h	N/A	N/A	N/A				h	15.015	0.509449						h	N/A	N/A	N/A				h	11.32	0.435854					h	N/A	N/A	N/A
	w	N/A	N/A	N/A				w	N/A	N/A	N/A				w	29.473							w	N/A	N/A	N/A				w	25.972						w	N/A	N/A	N/A
	h	N/A	N/A	N/A				h	N/A	N/A	N/A				h	18.625	1.63693						h	N/A	N/A	N/A				h	15.69	1.47089					h	N/A	N/A	N/A
	w	N/A	N/A	N/A				w	N/A	N/A	N/A				w	11.378							w	N/A	N/A	N/A				w	10.667						w	N/A	N/A	N/A
	h	N/A	N/A	N/A				h	N/A	N/A	N/A				h	16.091	0.938689						h	N/A	N/A	N/A				h	9.428	0.525735					h	N/A	N/A	N/A
	w	N/A	N/A	N/A				w	N/A	N/A	N/A				w	17.142							w	N/A	N/A	N/A				w	17.933						w	N/A	N/A	N/A
7	h	N/A	N/A	N/A	Disorganised		7	h	N/A	N/A	N/A	Disorganised		7	h	14.323	1.17836	0.926356	Squamous			7	h	N/A	N/A	N/A			7	h	17.166	0.973184	1.01256	Squamous		7	h	9.591	0.627396	0.616589	Squamous
	w	N/A	N/A	N/A				w	N/A	N/A	N/A				w	12.155							w	N/A	N/A	N/A	Disorganised			w	17.639						w	15.287
	h	N/A	N/A	N/A				h	N/A	N/A	N/A				h	13.576	0.883912						h	N/A	N/A	N/A				h	15.015	0.776571					h	6.646	0.285383
	w	N/A	N/A	N/A				w	N/A	N/A	N/A				w	15.359							w	N/A	N/A	N/A				w	19.335						w	23.288
	h	N/A	N/A	N/A				h	N/A	N/A	N/A				h	8.181	0.529001						h	N/A	N/A	N/A				h	10.505	0.968917					h	12.86	0.691175
	w	N/A	N/A	N/A				w	N/A	N/A	N/A				w	15.465							w	N/A	N/A	N/A				w	10.842						w	18.606
	h	N/A	N/A	N/A				h	N/A	N/A	N/A				h	17.481	1.11415						h	N/A	N/A	N/A				h	19.398	1.33155					h	10.285	0.862401
	w	N/A	N/A	N/A				w	N/A	N/A	N/A				w	15.69							w	N/A	N/A	N/A				w	14.568						w	11.926
8	h	N/A	N/A	N/A	Disorganised		8	h	N/A	N/A	N/A	Disorganised		8		15.486	0.910245	0.786539	Squamous			8	h	8.201	0.291415	0.458487	Squamous		8		13.202	0.79983	0.844736	Squamous		8		14.242	1.4242	0.954702	Columnar
	w	N/A	N/A	N/A				w	N/A	N/A	N/A					17.013							w	28.142							16.506							10
	h	N/A	N/A	N/A				h	N/A	N/A	N/A					10.133	0.8493						h	8.305	0.526833						10.125	0.811298						11.142	0.578114
	w	N/A	N/A	N/A				w	N/A	N/A	N/A					11.931							w	15.764							12.48							19.273
	h	N/A	N/A	N/A				h	N/A	N/A	N/A					10.133	0.707069						h	7.013	0.458636						11.233	1.0332						10.791	0.967716
	w	N/A	N/A	N/A				w	N/A	N/A	N/A					14.331							w	15.291							10.872							11.151
	h	N/A	N/A	N/A				h	N/A	N/A	N/A					13.546	0.679542						h	9.674	0.557066						10.109	0.734612						12.842	0.848777
	w	N/A	N/A	N/A				w	N/A	N/A	N/A					19.934							w	17.366							13.761							15.13
9	h	N/A	N/A	N/A	Disorganised		9	h	N/A	N/A	N/A	Disorganised		9		26.126	2.93617	1.32928	Columnar			9	h	N/A	N/A	N/A	Disogranised		9		N/A	N/A	N/A	Disorganised		9		N/A	N/A	N/A	Disogranised
	w	N/A	N/A	N/A				w	N/A	N/A	N/A					8.898							w	N/A	N/A	N/A					N/A	N/A	N/A					N/A	N/A	N/A
	h	N/A	N/A	N/A				h	N/A	N/A	N/A					15.544	0.942518						h	N/A	N/A	N/A					N/A	N/A	N/A					N/A	N/A	N/A
	w	N/A	N/A	N/A				w	N/A	N/A	N/A					16.492							w	N/A	N/A	N/A					N/A	N/A	N/A					N/A	N/A	N/A
	h	N/A	N/A	N/A				h	N/A	N/A	N/A					12.687	0.79096						h	N/A	N/A	N/A					N/A	N/A	N/A					N/A	N/A	N/A
	w	N/A	N/A	N/A				w	N/A	N/A	N/A					16.04							w	N/A	N/A	N/A					N/A	N/A	N/A					N/A	N/A	N/A
	h	N/A	N/A	N/A				h	N/A	N/A	N/A					16.859	0.647477						h	N/A	N/A	N/A					N/A	N/A	N/A					N/A	N/A	N/A
	w	N/A	N/A	N/A				w	N/A	N/A	N/A					26.038							w	N/A	N/A	N/A					N/A	N/A	N/A					N/A	N/A	N/A
														10		7.761	0.297641	0.532095	Squamous					N/A	N/A	N/A			10		19.956	1.21004	1.12727	Columnar
																26.075															16.492
																8.241	0.338773														16.101	1.85602
																24.326															8.675
																9.467	0.625091														10.667	0.565949
																15.145															18.848
																13.03	0.866875														15.544	0.877052
																15.031															17.723
														11		10.036	0.893439	0.580971	Squamous										11		12.272	0.917053	0.847333	Squamous
																11.233															13.382
																7.284	0.274123														14.279	0.922059
																26.572															15.486
																8.889	0.511509														11.828	0.872786
																17.378															13.552
																11.724	0.644814														10.675	0.677434
																18.182															15.758
														12		12.788	0.629858	0.650661	Squamous
																20.303
																10.991	0.600798
																18.294
																11.028	0.597886
																18.445
																16.267	0.774103
																21.014
																17.723	1.4703	1.08884	Columnar
														13		12.054
																12.936	0.678734
																19.059
																12.013	1.03766
																11.577
																16.873	1.16865
																14.438
																16.487	1.03147	1.11818	Columnar
														14		15.984
																18.271	1.61405
																11.32
																10.125	0.862069
																11.745
																16.659	0.965124
																17.261
																17.059	0.938236	0.918463	Squamous
														15		18.182
																13.431	0.744595
																18.038
																13.546	0.971039
																13.95
																20.827	1.01998
																20.419
																16.407	1.59276	1.15508	Columnar
														16		10.301
																13.932	0.735664
																18.938
																14.596	1.00351
																14.545
																16.146	1.28838
																12.532
[truncated: 4 more columns]

## Sheet: F5S1I
NANOG level analysis of hESCs cultured in YSLC conditioned medium in 2D in the presence of BMP4
units= fluorescence intensity (a.u.)
		Exp 1	29.1557	1			12.2868	0.421419			34.6965	1.19004			Exp 2	30.7596	1			12.7196	0.413517			33.4352	1.08698			Exp 3	40.9546	1			13.8238	0.33754			37.1696	0.90758
		Control	NANOG	rel NANOG		+ BMP4	NANOG	rel NANOG		+ BMP4 + YSLC CM	NANOG	rel NANOG			Control	NANOG	rel NANOG		+ BMP4	NANOG	rel NANOG		+ BMP4	NANOG	rel NANOG			Control	NANOG	rel NANOG		+ BMP4	NANOG	rel NANOG		+ BMP4	NANOG	rel NANOG
			26.699	0.915739			9.629	0.330261			36.307	1.24528				33.31	1.08291			14.955	0.48619			29.647	0.963829				47.529	1.16053			15.316	0.373975			19.359	0.472694					NANOG
			20.61	0.706894			6.355	0.217968			42.551	1.45944				29.679	0.964869			13.723	0.446137			29.32	0.953198				38.523	0.940627			27.766	0.67797			34.565	0.843983					hESC	+BMP4	+BMP4+YSLC CM
			20.401	0.699726			3.96	0.135823			36.846	1.26377				19.441	0.63203			21.238	0.690451			30.351	0.986716				25.629	0.62579			10.679	0.260752			18.239	0.445347				Number of values	6736	8659	7255
			30.899	1.05979			3.684	0.126356			42.824	1.4688				21.015	0.683201			23.883	0.77644			33.205	1.0795				43.536	1.06303			16.471	0.402177			22.169	0.541306
			23.027	0.789794			17.814	0.610995			28.956	0.993151				30.684	0.997542			31.16	1.01302			33.448	1.0874				37.898	0.925366			19.473	0.475478			18.811	0.459313				Minimum	0.02347	0.00868	0.02127
			31.096	1.06655			8.457	0.290063			33.199	1.13868				29.565	0.961163			21.684	0.704951			42.842	1.3928				36.685	0.895748			12.78	0.312053			25.946	0.633531				25% Percentile	0.8649	0.2133	0.8979
			25.239	0.865663			5.22	0.179039			36.045	1.23629				30.554	0.993316			21.618	0.702805			36.738	1.19436				25.95	0.633628			12.805	0.312663			25.119	0.613337				Median	0.992	0.365	1.067
			27.116	0.930041			9.374	0.321515			43.567	1.49429				27.487	0.893607			23.375	0.759925			36.027	1.17124				40.569	0.990584			13.798	0.336909			21.864	0.533859				75% Percentile	1.133	0.5274	1.237
			31.376	1.07615			16.35	0.560782			32.568	1.11704				30.729	0.999005			26.205	0.851929			25.189	0.818899				35	0.854604			8.568	0.209207			24.058	0.587431				Maximum	2.095	1.629	2.577
			22.367	0.767157			8.01	0.274732			36.52	1.25259				30.984	1.0073			26.437	0.859471			34.272	1.11419				46.38	1.13247			8.518	0.207986			26.579	0.648987
			21.486	0.73694			6.2	0.212651			43.906	1.50591				24.775	0.805439			9.456	0.307416			29.843	0.970201				35.664	0.870818			9.586	0.234064			33.489	0.81771				Mean	1	0.3898	1.071
			25.776	0.884081			5.807	0.199172			37.444	1.28428				24.1	0.783495			17.994	0.584988			26.678	0.867306				39.408	0.962236			14.675	0.358323			20.067	0.489981				Std. Deviation	0.2245	0.2215	0.2707
			25.701	0.881509			13.256	0.454662			36.046	1.23633				46.107	1.49895			10.047	0.32663			36.584	1.18935				34.046	0.83131			20.803	0.507952			25.502	0.622689				Std. Error of Mean	0.002736	0.00238	0.003178
			22.257	0.763384			13.385	0.459087			45.545	1.56213				27.285	0.88704			21.815	0.709209			34.173	1.11097				44.904	1.09643			23.68	0.578201			23.175	0.56587
			25.751	0.883224			6.419	0.220163			32.734	1.12273				35.042	1.13922			14.338	0.466131			33.884	1.10157				39.143	0.955765			17.088	0.417242			23.344	0.569997				Lower 95% CI of mean	0.9946	0.3851	1.065
			25.812	0.885316			3.457	0.11857			34.164	1.17178				38.806	1.26159			9.201	0.299126			32.812	1.06672				27.34	0.667568			14.948	0.364989			20.359	0.497111				Upper 95% CI of mean	1.005	0.3945	1.078
			27.957	0.958886			3.914	0.134245			34.578	1.18598				21.394	0.695523			18.817	0.611744			28.366	0.922184				36.409	0.889008			15.484	0.378077			22.986	0.561255
			32.615	1.11865			4.826	0.165525			25.89	0.887991				27.913	0.907456			15.956	0.518732			32.499	1.05655				38.631	0.943264			8.255	0.201565			24.47	0.597491				Sum	6736	3375	7774
			19.834	0.680279			6.037	0.207061			36.004	1.23489				27.901	0.907066			17.461	0.56766			37.101	1.20616				40.097	0.979059			5.803	0.141693			23.615	0.576614
			20.099	0.689368			16.655	0.571243			27.976	0.959538				30.523	0.992308			12.716	0.413399			32.02	1.04098				36.319	0.886811			12.272	0.299649			35.211	0.859757				D'Agostino & Pearson normality test
			20.37	0.698663			12.441	0.426709			33.574	1.15154				27.627	0.898159			10.675	0.347046			28.195	0.916624				33.086	0.80787			19.512	0.47643			29.706	0.725339				K2	305.6	790.3	154.7
			25.831	0.885967			5.831	0.199995			31.558	1.0824				37.618	1.22297			11.659	0.379036			36.796	1.19624				34.819	0.850185			20.662	0.50451			21.608	0.527608				P value	<0.0001	<0.0001	<0.0001
			27.42	0.940468			14.325	0.491328			7.907	0.271199				24.562	0.798515			24.316	0.790517			27.603	0.897378				25.919	0.632871			18.338	0.447764			26.559	0.648498				Passed normality test (alpha=0.05)?	No	No	No
			20.803	0.713514			4.89	0.16772			15.028	0.51544				18.376	0.597407			20.669	0.671953			25.469	0.828002				49.395	1.20609			16.458	0.401859			28.478	0.695355				P value summary	****	****	****
			30.383	1.04209			5.234	0.179519			38.817	1.33137				27.017	0.878327			23.465	0.762851			35.154	1.14286				37.119	0.906345			15.689	0.383083			23.616	0.576638
			30.322	1.04			9.119	0.312769			33.996	1.16602				43.648	1.419			26.497	0.861422			36.534	1.18773				27.847	0.679948			8.694	0.212284			20.2	0.493229
			29.425	1.00924			4.525	0.155201			40.714	1.39643				27.597	0.897183			13.042	0.423998			35.306	1.1478				39.219	0.957621			15.45	0.377247			25.765	0.629111
			28.047	0.961973			11.128	0.381675			35.712	1.22487				28.639	0.931059			19.276	0.626666			28.09	0.913211				46.839	1.14368			9.248	0.225811			21.788	0.532003				Kruskal-Wallis test
			23.147	0.79391			5.009	0.171802			41.275	1.41568				33.15	1.07771			27.45	0.892404			19.739	0.641718				49.264	1.20289			26.149	0.638487			25.498	0.622592				P value	<0.0001
			23.705	0.813049			6.732	0.230898			41.933	1.43824				20.463	0.665256			23.395	0.760575			33.635	1.09348				38.909	0.950052			19.82	0.48395			29.229	0.713692				Exact or approximate P value?	Approximate
			18.413	0.63154			4.593	0.157534			35.408	1.21445				23.415	0.761226			22.188	0.721336			35.44	1.15216				48.371	1.18109			9.955	0.243074			29.413	0.718185				P value summary	****
			25.745	0.883018			10.822	0.37118			38.965	1.33645				32.59	1.05951			21.902	0.712038			25.944	0.843444				46.649	1.13904			18.779	0.458532			28.496	0.695795				Do the medians vary signif. (P < 0.05)?	Yes
			31.815	1.09121			7.043	0.241565			39.314	1.34842				32.081	1.04296			10.461	0.340089			39.116	1.27167				26.446	0.645739			27.604	0.674014			32.565	0.795148				Number of groups	3
			22.067	0.756867			10.482	0.359518			41.423	1.42075				36.159	1.17554			21.585	0.701732			33.997	1.10525				33.424	0.816123			23.675	0.578079			30.584	0.746778				Kruskal-Wallis statistic	14180
			25.282	0.867137			16.093	0.551968			34.866	1.19586				21.459	0.697636			17.798	0.578616			41.874	1.36133				35.806	0.874285			16.016	0.391067			20.396	0.498015
			23.791	0.815998			10.443	0.35818			45.009	1.54375				28.654	0.931546			17.198	0.55911			28.843	0.937691				31.503	0.769217			11.89	0.290321			35.043	0.855654				Data summary
			22.224	0.762252			5.684	0.194953			24.711	0.847553				39.33	1.27863			24.105	0.783658			23.135	0.752123				43.388	1.05942			12.502	0.305265			31.851	0.777714				Number of treatments (columns)	3
			19.772	0.678152			3.173	0.108829			25.243	0.8658				31.325	1.01838			20.682	0.672375			37.391	1.21559				43.61	1.06484			12.535	0.30607			20.567	0.50219				Number of values (total)	22650
			21.791	0.747401			6.962	0.238787			36.255	1.2435				21.377	0.69497			13.656	0.443959			28.038	0.91152				39.544	0.965557			9.516	0.232355			20.176	0.492643
			17.884	0.613396			6.834	0.234397			31.543	1.08188				25.401	0.825791			29.776	0.968023			27.782	0.903198				53.529	1.30703			12.275	0.299722			22.522	0.549926
			16.282	0.55845			4.936	0.169298			33.514	1.14948				27.819	0.9044			25.461	0.827741			35.414	1.15132				32.136	0.784673			16.319	0.398465			25.632	0.625863
			24.984	0.856917			5.167	0.177221			40.067	1.37424				18.953	0.616165			15.971	0.51922			32.684	1.06256				40.897	0.998593			13.305	0.324872			29.652	0.724021				Dunn's multiple comparisons test	Mean rank diff.	Significant?	Summary	Adjusted P Value
			19.976	0.685149			10.197	0.349743			40.515	1.38961				20.999	0.682681			21.969	0.714216			34.51	1.12193				33.869	0.826989			14.009	0.342062			23.567	0.575442
			17.085	0.585992			5.97	0.204763			39.571	1.35723				28.614	0.930246			27.883	0.906481			31.043	1.00921				39.382	0.961601			15.993	0.390505			30.027	0.733177				Column A vs. Column B	9974	Yes	****	<0.0001	A-B
			20.8	0.713411			8.808	0.302102			45.947	1.57592				27.268	0.886487			22.837	0.742435			29.962	0.97407				37.636	0.918968			22.598	0.551781			15.764	0.384914				Column A vs. Column C	-1210	Yes	****	<0.0001	A-C
			28.705	0.984542			17.236	0.591171			41.522	1.42415				25.781	0.838145			20.639	0.670977			40.501	1.31669				34.856	0.851088			25.699	0.627499			17.404	0.424958				Column B vs. Column C	-11184	Yes	****	<0.0001	B-C
			22.774	0.781117			14.342	0.491911			39.585	1.35771				20.163	0.655503			13.672	0.444479			25.511	0.829367				41.927	1.02374			11.582	0.282801			25.942	0.633433
			30.191	1.03551			8.059	0.276413			49.757	1.7066				24.726	0.803846			22.581	0.734112			32.757	1.06494				33.981	0.829723			21.7	0.529855			25.812	0.630259
			22.685	0.778064			9.614	0.329747			39.076	1.34025				34.084	1.10808			25.62	0.832911			33.438	1.08708				36.466	0.8904			4.639	0.113272			34.062	0.831701				Test details	Mean rank 1	Mean rank 2	Mean rank diff.	n1	n2
			29.466	1.01064			10.105	0.346587			33.054	1.13371				23.243	0.755634			28.159	0.915454			30.821	1.002				51.843	1.26586			17.658	0.43116			33.943	0.828795
			27.061	0.928155			9.158	0.314107			37.884	1.29937				31.976	1.03955			27.022	0.87849			37.671	1.22469				40.827	0.996884			5.469	0.133538			33.388	0.815244				Column A vs. Column B	14751	4777	9974	6736	8659
			30.905	1.06			9.755	0.334583			46.318	1.58864				20.173	0.655828			26.553	0.863243			38.073	1.23776				44.426	1.08476			5.616	0.137127			35.733	0.872502				Column A vs. Column C	14751	15961	-1210	6736	7255
			20.061	0.688064			10.401	0.35674			45.286	1.55325				27.895	0.906871			16.725	0.543733			36.393	1.18314				38.192	0.932544			18.152	0.443222			20.683	0.505022				Column B vs. Column C	4777	15961	-11184	8659	7255
			23.869	0.818674			6.658	0.22836			32.437	1.11254				35.238	1.14559			12.958	0.421267			27.254	0.886032				44.37	1.08339			11.571	0.282532			24.629	0.601373
			17.154	0.588358			4.925	0.168921			41.143	1.41115				27.584	0.896761			9.526	0.309692			31.552	1.02576				58.914	1.43852			17.212	0.42027			20.658	0.504412
			23.944	0.821246			7.26	0.249008			39.307	1.34818				32.633	1.0609			18.376	0.597407			26.945	0.875987				43.993	1.07419			14.595	0.35637			30.078	0.734423
			22.777	0.781219			6.03	0.206821			30.355	1.04113				24.88	0.808853			26.43	0.859244			41.82	1.35958				40.249	0.982771			24.003	0.586088			22.769	0.555957
			20.629	0.707546			7.07	0.242491			43.528	1.49295				34.084	1.10808			11.067	0.35979			39.214	1.27485				34.773	0.849062			15.453	0.37732			18.444	0.450352
			23.478	0.805263			7.107	0.24376			37.516	1.28675				22.431	0.729236			25.794	0.838567			36.417	1.18392				44.966	1.09795			14.572	0.355808			23.983	0.585599
			21.271	0.729566			7.804	0.267666			45.219	1.55095				44.549	1.4483			36.719	1.19374			34.039	1.10661				41.116	1.00394			12.828	0.313225			21.139	0.516157
			23.779	0.815587			6.001	0.205826			33.396	1.14544				19.586	0.636744			10.388	0.337716			41.23	1.34039				45.446	1.10967			41.408	1.01107			25.599	0.625058
			27.036	0.927297			4.226	0.144946			42.106	1.44418				22.626	0.735575			20.956	0.681283			33.293	1.08236				42.934	1.04833			10.601	0.258847			22.206	0.54221
			28.595	0.980769			3.111	0.106703			35.054	1.2023				32.778	1.06562			15.589	0.506801			31.076	1.01029				27.552	0.672745			24.598	0.600616			25.738	0.628452
			21.487	0.736974			6.533	0.224073			35.036	1.20169				26.986	0.877319			16.592	0.539409			35.598	1.1573				26.333	0.64298			24.67	0.602374			33.164	0.809774
			16.586	0.568877			5.755	0.197389			36.082	1.23756				32.772	1.06542			14.689	0.477542			23.901	0.777026				32.001	0.781377			25.347	0.618905			26.798	0.654334
			27.941	0.958338			8.989	0.30831			31.446	1.07855				35.432	1.1519			35.617	1.15791			31.888	1.03668				15.877	0.387673			15.975	0.390066			29.964	0.731639
			20.187	0.692386			7.108	0.243795			42.453	1.45608				22.121	0.719158			33.814	1.0993			30.612	0.995201				34.608	0.845033			10.172	0.248372			29.071	0.709834
			26.169	0.89756			5.341	0.183189			46.495	1.59471				40.156	1.30548			10.804	0.35124			37.443	1.21728				25.578	0.624545			9.854	0.240608			30.954	0.755812
			18.584	0.637405			7.556	0.25916			42.655	1.46301				28.421	0.923972			24.98	0.812104			31.127	1.01194				43.591	1.06437			15.897	0.388161			25.605	0.625204
			17.873	0.613019			5.938	0.203665			42.351	1.45258				34.538	1.12284			26.167	0.850694			23.385	0.76025				32.621	0.796516			10.012	0.244466			23.919	0.584037
			19.633	0.673385			8.31	0.285021			34.212	1.17342				25.713	0.835934			16.506	0.536613			22.542	0.732844				45.238	1.10459			11.846	0.289247			27.887	0.680924
			21.877	0.750351			2.627	0.0901025			29.164	1.00028				19.379	0.630015			14.685	0.477412			27.23	0.885252				36.04	0.879998			12.479	0.304703			23.523	0.574367
			28.527	0.978436			11.397	0.390901			40.71	1.3963				1.193	0.0387846			17.845	0.580144			34.459	1.12027				26.621	0.650012			31.088	0.759084			25.556	0.624008
			35.239	1.20865			6.695	0.229629			49.055	1.68252				22.086	0.71802			16.532	0.537458			43.674	1.41985				41.502	1.01337			18.669	0.455846			22.966	0.560767
			27.382	0.939165			5.873	0.201436			38.447	1.31868				24.327	0.790875			19.588	0.636809			26.367	0.857196				41.429	1.01158			12.074	0.294814			23.404	0.571462
			16.079	0.551487			9.419	0.323059			34.674	1.18927				22.902	0.744548			22.72	0.738631			22.256	0.723546				31.415	0.767069			11.116	0.271422			29.916	0.730467
			24.054	0.825019			11.684	0.400745			42.707	1.46479				36.35	1.18174			17.248	0.560735			33.531	1.0901				41.931	1.02384			13.628	0.332759			21.528	0.525655
			26.669	0.91471			4.148	0.142271			36.145	1.23972				30.152	0.980247			22.111	0.718832			39.645	1.28887				44.301	1.08171			26.598	0.649451			24.951	0.609235
			17.73	0.608114			8.134	0.278985			43.602	1.49549				24.644	0.801181			29.221	0.94998			31.45	1.02244				36.545	0.892329			17.448	0.426033			27.058	0.660683
			27.228	0.933883			7.689	0.263722			57.655	1.97749				39.306	1.27784			14.429	0.469089			36.808	1.19663				36.17	0.883173			9.753	0.238142			26.758	0.653357
			25.525	0.875472			10.752	0.368779			30.553	1.04793				34.324	1.11588			15.773	0.512783			29.412	0.956189				51.359	1.25405			23.942	0.584598			23.485	0.57344
			29.71	1.01901			7.719	0.264751			56.057	1.92268				39.155	1.27294			9.367	0.304523			41.315	1.34316				34.497	0.842323			4.189	0.102284			23.776	0.580545
			29.867	1.0244			8.361	0.286771			45.221	1.55102				24.489	0.796142			27.967	0.909212			23.561	0.765972				43.885	1.07155			26.368	0.643835			24.617	0.60108
			17.927	0.614871			9.779	0.335406			46.497	1.59478				41.372	1.34501			24.102	0.78356			38.913	1.26507				35.679	0.871184			15.323	0.374146			26.032	0.63563
			18.273	0.626739			6.057	0.207747			31.156	1.06861				22.117	0.719027			19.564	0.636029			31.586	1.02687				46.279	1.13001			16.218	0.395999			24.492	0.598028
			24.322	0.834211			6.681	0.229149			48.013	1.64678				22.331	0.725985			22.823	0.74198			0.964	0.0313398				53.073	1.2959			12.435	0.303629			28.244	0.689641
			18.497	0.634421			5.496	0.188505			34.059	1.16818				26.426	0.859114			36.706	1.19332			34.242	1.11321				36.702	0.896163			21.919	0.535202			24.313	0.593657
			29.562	1.01394			7.989	0.274012			36.198	1.24154				24.036	0.781414			13.402	0.435701			37.642	1.22375				48.323	1.17992			10.987	0.268273			26.949	0.658021
			30.569	1.04847			11.98	0.410897			31.345	1.07509				45.018	1.46354			36.289	1.17976			27.496	0.8939				49.682	1.2131			14.838	0.362303			22.515	0.549755
			23.89	0.819394			11.62	0.39855			48.774	1.67288				28.263	0.918835			24.813	0.806675			31.127	1.01194				26.377	0.644054			17.643	0.430794			20.38	0.497624
			17.667	0.605954			10.792	0.370151			46.519	1.59554				21.237	0.690419			13.94	0.453192			21.428	0.696628				38.134	0.931128			19.353	0.472547			26.081	0.636827
			19.672	0.674722			5.82	0.199618			47.4	1.62575				40.487	1.31624			16.005	0.520325			28.542	0.927905				30.211	0.73767			10.149	0.247811			29.039	0.709053
			23.207	0.795968			11.395	0.390833			39.394	1.35116				22.074	0.71763			12.016	0.390642			29.567	0.961228				33.53	0.818711			8.012	0.195631			25.807	0.630137
			40.743	1.39743			8.019	0.275041			37.346	1.28092				37.679	1.22495			18.657	0.606542			25.72	0.836162				26.677	0.65138			15.309	0.373804			25.119	0.613337
			24.262	0.832153			11.077	0.379926			44.926	1.5409				28.397	0.923191			21.824	0.709502			38.918	1.26523				23.11	0.564283			17.795	0.434505			22.513	0.549706
			39.15	1.34279			6.958	0.23865			48.436	1.66129				35.931	1.16812			19.701	0.640483			30.753	0.999785				45.42	1.10903			24.227	0.591557			35.104	0.857144
			24.988	0.857054			12.396	0.425166			48.938	1.67851				21.244	0.690646			22.112	0.718865			27.11	0.881351				38.878	0.949295			16.534	0.403715			29.427	0.718527
			19.493	0.668583			13.309	0.45648			35.461	1.21626				33.716	1.09611			23.076	0.750205			32.743	1.06448				29.143	0.711593			6.518	0.159152			23.397	0.571291
			17.614	0.604136			5.079	0.174203			45.796	1.57074				36.814	1.19683			25.228	0.820167			30.434	0.989415				26.954	0.658143			12.88	0.314494			23.542	0.574831
			19.196	0.658396			8.225	0.282106			50.819	1.74302				21.174	0.68837			29.69	0.965227			23.049	0.749327				37.137	0.906784			20.634	0.503826			18.88	0.460998
			22.842	0.783449			6.762	0.231927			43.812	1.50269				27.026	0.87862			11.827	0.384498			29.955	0.973842				36.066	0.880633			13.347	0.325897			25.315	0.618123
			16.144	0.553717			1.216	0.0417071			41.904	1.43725				33.218	1.07992			12.723	0.413627			31.363	1.01962				30.952	0.755763			25.899	0.632383			27.27	0.665859
			22.077	0.75721			3.176	0.108932			40.743	1.39743				21.488	0.698579			17.941	0.583265			24.91	0.809828				41.186	1.00565			12.954	0.316301			37.333	0.91157
			17.054	0.584929			10.662	0.365692			48.803	1.67388				31.874	1.03623			4.867	0.158227			21.452	0.697408				40.604	0.991439			14.164	0.345846			23.947	0.58472
			26.311	0.902431			4.974	0.170601			42.668	1.46345				36.542	1.18799			14.296	0.464765			28.754	0.934797				40.66	0.992806			11.948	0.291738			25.042	0.611457
			18.051	0.619124			6.756	0.231721			54.217	1.85957				30.133	0.979629			6.729	0.218761			29.053	0.944518				34.718	0.847719			9.434	0.230353			22.391	0.546727
			17.853	0.612333			9.039	0.310025			40.336	1.38347				35.101	1.14114			27.612	0.897671			29.429	0.956742				34.194	0.834924			3.22	0.0786236			22.418	0.547386
			24.025	0.824024			12.254	0.420295			38.406	1.31727				20.646	0.671205			13.499	0.438855			34.623	1.1256				29.723	0.725755			17.375	0.42425			21.355	0.521431
			23.397	0.802485			7.875	0.270102			38.162	1.3089				31.945	1.03854			0.93	0.0302345			23.629	0.768183				23.627	0.576907			14.473	0.353391			26.141	0.638292
			22.725	0.779436			5.899	0.202328			39.706	1.36186				26.358	0.856903			24.811	0.80661			33.229	1.08028				41.194	1.00585			11.102	0.271081			20.635	0.50385
			25.193	0.864085			6.617	0.226954			52.358	1.79581				35.575	1.15655			14.033	0.456215			26.215	0.852254				26.875	0.656214			18.51	0.451964			26.777	0.653821
			26.318	0.902671			12.687	0.435146			53.129	1.82225				30.051	0.976963			13.12	0.426533			27.905	0.907196				26.897	0.656751			8.546	0.20867			25.191	0.615095
			17.919	0.614597			3.591	0.123166			56.188	1.92717				23.285	0.756999			28.292	0.919778			29.262	0.951313				32.372	0.790436			18.053	0.440805			26.03	0.635582
			6.527	0.223867			9.562	0.327963			67.661	2.32068				24.784	0.805732			7.722	0.251044			35.607	1.15759				41.525	1.01393			12.086	0.295107			26.763	0.653479
			28.193	0.966981			5.782	0.198315			43.299	1.4851				38.178	1.24117			12.467	0.405304			28.7	0.933042				20.369	0.497355			15.579	0.380397			23.83	0.581864
			25.689	0.881097			6.163	0.211382			49.493	1.69754				27.73	0.901507			16.996	0.552543			26.285	0.85453				41.679	1.01769			5.956	0.145429			27.756	0.677726
			32.395	1.1111			4.114	0.141104			57.804	1.9826				36.125	1.17443			15.008	0.487913			33.662	1.09436				41.209	1.00621			14.358	0.350583			26.739	0.652893
			35.626	1.22192			3.928	0.134725			43.099	1.47824				26.233	0.852839			1.59	0.0516912			30.816	1.00183				40.934	0.999497			7.737	0.188916			28.359	0.692449
			42.029	1.44154			7.663	0.26283			44.801	1.53661				24.668	0.801961			16.504	0.536548			29.022	0.94351				35.987	0.878704			8.993	0.219585			21.622	0.52795
			20.771	0.712416			4.384	0.150365			36.614	1.25581				37.226	1.21022			16.062	0.522178			31.517	1.02462				44.601	1.08903			16.741	0.40877			26.811	0.654651
			13.935	0.477951			9.375	0.321549			48.274	1.65573				24.55	0.798125			12.699	0.412847			43.279	1.40701				44.405	1.08425			10.487	0.256064			19.646	0.479702
			23.391	0.802279			6.005	0.205963			40.442	1.3871				23.115	0.751473			11.061	0.359595			31.331	1.01858				42.802	1.04511			13.512	0.329926			21.403	0.522603
			29.325	1.00581			2.164	0.0742222			42.23	1.44843				20.987	0.682291			12.509	0.40667			26.44	0.859569				30.205	0.737524			19.865	0.485049			32.005	0.781475
			27.434	0.940948			3.658	0.125464			41.596	1.42669				33.238	1.08057			0.976	0.0317299			31.766	1.03272				37.403	0.913279			5.149	0.125725			31.125	0.759988
			28.841	0.989206			4.039	0.138532			60.616	2.07904				28.262	0.918802			14.526	0.472243			30.408	0.988569				32.592	0.795808			7.951	0.194142			28.73	0.701508
			24.779	0.849885			5.496	0.188505			43.343	1.4866				22.977	0.746986			15.326	0.498251			21.176	0.688435				37.079	0.905368			18.53	0.452452			23.316	0.569313
			21.921	0.75186			9.566	0.328101			45.454	1.55901				23.368	0.759698			13.312	0.432775			12.953	0.421104				46.822	1.14327			12.089	0.29518			21.495	0.524849
			21.079	0.72298			4.091	0.140316			44.421	1.52358				32.738	1.06432			4.532	0.147336			34.313	1.11552				44.306	1.08183			8.166	0.199391			24.484	0.597832
			7.016	0.240639			7.237	0.248219			41.136	1.41091				33.779	1.09816			29.308	0.952808			27.388	0.890389				27.579	0.673404			9.369	0.228765			21.884	0.534348
			21.802	0.747778			6.914	0.237141			32.575	1.11728				23.546	0.765484			25.824	0.839543			30.24	0.983108				37.727	0.92119			17.618	0.430183			21.368	0.521748
			30.512	1.04652			2.733	0.0937381			75.124	2.57665				26.214	0.852222			17.344	0.563856			31.913	1.0375				19.167	0.468006			16.88	0.412164			26.592	0.649304
			28.41	0.974424			6.2	0.212651			43.399	1.48853				34.626	1.1257			22.767	0.740159			32.883	1.06903				49.191	1.20111			7.512	0.183423			27.887	0.680924
			31.991	1.09725			3.771	0.12934			40.757	1.39791				21.377	0.69497			17.869	0.580924			30.398	0.988244				26.572	0.648816			15.772	0.385109			33.179	0.810141
			25.921	0.889054			5.745	0.197046			61.098	2.09558				32.009	1.04062			13.463	0.437684			32.35	1.0517				36.429	0.889497			2.934	0.0716403			18.55	0.45294
			19.971	0.684978			3.206	0.109961			50.193	1.72155				33.84	1.10014			10.547	0.342885			37.676	1.22485				15.517	0.378883			13.966	0.341012			24.977	0.60987
			6.453	0.221329			3.228	0.110716			44.331	1.52049				24.082	0.78291			11.487	0.373444			28.914	0.939999				44.665	1.0906			20.521	0.501067			24.723	0.603668
			22.573	0.774223			4.946	0.169641			30.9	1.05983				34.258	1.11373			16.839	0.547439			30.576	0.994031				11.151	0.272277			2.6	0.0634849			21.522	0.525509
			22.357	0.766814			21.626	0.741742			46.052	1.57952				36.502	1.18669			4.121	0.133974			27.693	0.900304				48.623	1.18724			22.45	0.548168			35.391	0.864152
			25.953	0.890152			6.866	0.235494			50.851	1.74412				29.09	0.945721			6.766	0.219964			39.114	1.2716				47.501	1.15984			1.162	0.0283729			29.769	0.726878
			42.533	1.45882			4.792	0.164359			44.717	1.53373				34.375	1.11754			28.391	0.922996			28.368	0.922249				53.624	1.30935			8.022	0.195875			24.537	0.599127
			22.004	0.754707			17.306	0.593572			38.432	1.31816				41.392	1.34566			11.234	0.365219			32.741	1.06442				37.042	0.904465			18.459	0.450718			28.774	0.702583
			19.399	0.665359			4.473	0.153418			43.401	1.48859				32.454	1.05509			18.549	0.603031			33.909	1.10239				44.526	1.0872			1.234	0.0301309			27.529	0.672183
			24.053	0.824984			3.557	0.122			44.487	1.52584				33.643	1.09374			5.623	0.182805			28.351	0.921696				40.641	0.992342			4.84	0.11818			25.503	0.622714
			15.231	0.522402			9.467	0.324705			46.867	1.60747				12.555	0.408165			9.3	0.302345			36.51	1.18695				34.731	0.848036			2.743	0.0669766			25.968	0.634068
			6.844	0.23474			9.898	0.339488			39.896	1.36838				25.032	0.813795			3.446	0.11203			39.033	1.26897				27.308	0.666787			9.947	0.242879			31.991	0.781133
			24.059	0.82519			9.471	0.324842			40.196	1.37867				33.195	1.07918			17.885	0.581444			32.142	1.04494				16.116	0.393509			20.046	0.489469			33.998	0.830138
			40.533	1.39023			2.994	0.10269			44.625	1.53058				33.902	1.10216			30.726	0.998908			34.115	1.10908				28.457	0.694842			3.093	0.0755226			28.127	0.686785
			41.213	1.41355			3.276	0.112362			47.734	1.63721				24.999	0.812722			17.341	0.563759			30.794	1.00112				33.566	0.81959			3.506	0.085607			27.86	0.680265
			23.649	0.811128			6.91	0.237003			38.11	1.30712				24.169	0.785738			32.833	1.06741			24.863	0.8083				22.623	0.552392			1.4	0.0341842			3.471	0.0847524
			32.837	1.12626			6.271	0.215087			54.093	1.85531				30.104	0.978686			13.84	0.449941			32.697	1.06299				26.44	0.645593			5.574	0.136102			30.097	0.734887
			24.132	0.827694			2.828	0.0969965			48.665	1.66914				24.625	0.800563			20.804	0.676342			24.721	0.803684				32.098	0.783746			4.637	0.113223			33.277	0.812534
			23.318	0.799775			2.345	0.0804302			40.956	1.40473				33.341	1.08392			9.091	0.29555			30.429	0.989252				43.487	1.06183			3.784	0.092395			34.135	0.833484
			22.048	0.756216			3.412	0.117027			65.964	2.26247				27.89	0.906709			16.132	0.524454			32.835	1.06747				24.533	0.599029			21.943	0.535788			33.497	0.817905
			27.921	0.957652			7.555	0.259126			47.497	1.62908				29.932	0.973094			14.742	0.479265			32.055	1.04211				28.367	0.692645			7.603	0.185645			22.515	0.549755
			32.322	1.1086			8.984	0.308139			38.905	1.33439				23.532	0.765029			10.332	0.335895			30.654	0.996567				35.243	0.860538			18.236	0.445273			23.317	0.569338
			22.595	0.774977			8.461	0.290201			55.021	1.88714				24.042	0.78161			22.412	0.728618			27.351	0.889186				35.96	0.878045			13.129	0.320574			34.114	0.832971
			26.355	0.90394			6.516	0.22349			38.487	1.32005				5.893	0.191582			14.58	0.473998			38.079	1.23795				28.379	0.692938			20.739	0.50639			22.39	0.546703
			24.655	0.845632			12.492	0.428458			27.813	0.953947				22.459	0.730146			30.804	1.00144			25.843	0.84016				29.879	0.729564			7.349	0.179443			27.405	0.669155
			18.082	0.620187			2.67	0.0915773			58.547	2.00808				38.688	1.25775			8.039	0.261349			32.05	1.04195				28.561	0.697382			11.114	0.271374			24.637	0.601568
			21.104	0.723838			8.222	0.282003			35.106	1.20409				31.968	1.03929			13.032	0.423673			25.225	0.820069				32.355	0.790021			10.402	0.253988			27.246	0.665273
			34.045	1.1677			8.247	0.282861			57.678	1.97828				37.306	1.21282			5.855	0.190347			32.645	1.06129				30.64	0.748145			8.299	0.202639			30.332	0.740625
			18.889	0.647866			8.231	0.282312			35.148	1.20553				40.44	1.31471			11.252	0.365804			33.082	1.0755				16.36	0.399467			4.035	0.0985237			31.505	0.769266
			21.142	0.725141			2.792	0.0957617			31.196	1.06998				20.626	0.670555			16.333	0.530989			31.768	1.03278				42.976	1.04936			19.215	0.469178			28.889	0.705391
			23.857	0.818262			3.82	0.131021			37.021	1.26977				38.583	1.25434			7.744	0.251759			29.599	0.962269				24.335	0.594194			10.739	0.262217			25.772	0.629282
			24.406	0.837092			4.346	0.149062			48.922	1.67796				37.891	1.23184			10.932	0.355401			24.679	0.802319				33.612	0.820713			1.668	0.040728			34.125	0.833239
			7.418	0.254427			3.125	0.107183			42.12	1.44466				23.2	0.754236			4.203	0.13664			33.068	1.07505				29.418	0.718307			10.731	0.262022			25.164	0.614436
			29.816	1.02265			11.545	0.395977			32.243	1.10589				17.635	0.573317			3.508	0.114046			29.597	0.962204				31.895	0.778789			5.721	0.139691			34.589	0.844569
			23.956	0.821658			8.258	0.283238			43.667	1.49772				29.683	0.964999			14.018	0.455728			31.688	1.03018				46.472	1.13472			5.824	0.142206			35.764	0.873259
			28.777	0.987011			6.205	0.212823			50.573	1.73458				30.848	1.00287			8.05	0.261707			34.438	1.11959				31.43	0.767435			1.309	0.0319622			1.899	0.0463684
			21.388	0.733579			10.079	0.345696			53.877	1.84791				25.402	0.825823			2.265	0.0736355			30.637	0.996014				37.426	0.913841			4.23	0.103285			30.108	0.735155
			26.29	0.90171			6.682	0.229183			43.465	1.49079				30.253	0.98353			12.966	0.421527			30.066	0.977451				40.313	0.984333			3.2	0.0781353			26.993	0.659095
			24.725	0.848033			3.706	0.127111			39.717	1.36224				36.462	1.18539			3.547	0.115314			31.087	1.01064				29.151	0.711788			14.337	0.35007			29.298	0.715377
			21.212	0.727542			3.713	0.127351			35.218	1.20793				21.096	0.685835			5.851	0.190217			30.071	0.977613				32.953	0.804622			15.788	0.3855			26.252	0.641002
			23.127	0.793224			7.983	0.273806			28.234	0.968387				24.774	0.805407			7.333	0.238397			33.221	1.08002				38.147	0.931446			5.291	0.129192			29.435	0.718722
			22.193	0.761189			2.811	0.0964134			45.142	1.54831				22.755	0.739769			14.538	0.472633			32.73	1.06406				31.773	0.77581			3.824	0.0933716			9.635	0.23526
			28.868	0.990132			2.573	0.0882503			51.631	1.77087				45.021	1.46364			11.77	0.382645			26.498	0.861455				34.563	0.843934			14.953	0.365111			29.401	0.717892
			23.521	0.806738			6.301	0.216116			39.304	1.34807				31.992	1.04007			6.37	0.20709			26.65	0.866396				28.465	0.695038			4.389	0.107167			29.576	0.722165
			29.672	1.01771			15.65	0.536773			54.308	1.86269				38.094	1.23844			12.144	0.394804			33.389	1.08548				34.321	0.838025			3.408	0.0832141			31.543	0.770194
			22.203	0.761532			3.529	0.12104			50.421	1.72937				30.946	1.00606			14.128	0.459304			24.529	0.797442				34.595	0.844715			17.388	0.424568			27.346	0.667715
			21.617	0.741433			3.179	0.109035			45.159	1.54889				32.308	1.05034			8.607	0.279815			28.129	0.914479				25.613	0.6254			21.206	0.517793			24.189	0.590629
			22.481	0.771067			2.67	0.0915773			53.217	1.82527				33.432	1.08688			4.238	0.137778			31.403	1.02092				34.092	0.832434			5.34	0.130388			25.459	0.621639
			20.625	0.707409			7.92	0.271645			36.852	1.26397				20.796	0.676082			11.074	0.360018			35.043	1.13925				27.347	0.667739			16.651	0.406572			35.626	0.86989
			37.198	1.27584			7.167	0.245818			39.208	1.34478				21.689	0.705113			8.824	0.28687			30.238	0.983043				27.291	0.666372			12.821	0.313054			24.761	0.604596
			10.746	0.368573			1.652	0.0566613			40.894	1.40261				22.599	0.734697			7.185	0.233586			24.234	0.787851				34.345	0.838611			1.312	0.0320355			30.156	0.736327
			30.199	1.03578			1.043	0.0357735			34.51	1.18365				34.638	1.12609			6.492	0.211056			32.338	1.05131				40.199	0.98155			4.707	0.114932			28.689	0.700507
			28.727	0.985296			6.012	0.206203			36.385	1.24795				18.336	0.596107			8.761	0.284822			28.422	0.924004				26.656	0.650867			4.604	0.112417			30.825	0.752662
			33.138	1.13659			4.792	0.164359			35.805	1.22806				27.059	0.879693			12.762	0.414895			21.24	0.690516				31.62	0.772074			10.206	0.249203			22.767	0.555908
			43.549	1.49367			2.983	0.102313			36.271	1.24404				28.144	0.914966			6.621	0.21525			26.803	0.87137				32.066	0.782964			10.374	0.253305			27.474	0.67084
			30.773	1.05547			2.818	0.0966535			42.807	1.46822				41.75	1.3573			15.266	0.4963			36.985	1.20239				23.825	0.581741			3.409	0.0832385			25.298	0.617708
			26.558	0.910903			2.902	0.0995346			41.968	1.43944				44.687	1.45278			9.761	0.317332			37.661	1.22437				30.459	0.743726			6.852	0.167307			25.987	0.634532
			23.707	0.813117			3.543	0.12152			41.239	1.41444				27.818	0.904368			10.855	0.352898			30.275	0.984245				31.231	0.762576			4.991	0.121867			30.551	0.745972
			27.49	0.942869			6.053	0.207609			34.122	1.17034				18.361	0.596919			8.696	0.282708			28.357	0.921891				28.903	0.705732			3.978	0.0971319			21.301	0.520112
			35.607	1.22127			2.693	0.0923662			28.745	0.985914				30.437	0.989512			8.856	0.28791			29.035	0.943933				29.474	0.719675			12.037	0.293911			27.238	0.665078
			34.151	1.17133			4.46	0.152972			32.272	1.10688				23.431	0.761746			14.136	0.459564			31.497	1.02397				34.54	0.843373			1.945	0.0474916			32.248	0.787408
			40.235	1.38			1.704	0.0584448			34.391	1.17956				35.009	1.13815			17.115	0.556412			32.581	1.05921				43.25	1.05605			9.518	0.232404			38.837	0.948294
			34.516	1.18385			7.911	0.271336			30.93	1.06086				32.148	1.04514			13.074	0.425038			19.62	0.63785				27.644	0.674991			5.83	0.142353			28.328	0.691692
			39.717	1.36224			1.549	0.0531285			33.643	1.15391				27.128	0.881936			20.323	0.660704			26.481	0.860902				33.371	0.814829			5.679	0.138666			25.236	0.616194
			34.799	1.19356			1.669	0.0572444			46.739	1.60308				28.911	0.939902			30.996	1.00769			31.758	1.03246				26.256	0.6411			11.519	0.281263			31.209	0.762039
			33.32	1.14283			2.604	0.0893136			37.9	1.29992				27.516	0.89455			11.188	0.363724			35.651	1.15902				33.37	0.814804			11.066	0.270202			27.841	0.679801
			37.346	1.28092			2.507	0.0859866			46.324	1.58885				24.464	0.795329			6.359	0.206732			34.788	1.13096				35.429	0.865079			4.607	0.11249			23.912	0.583866
			32.265	1.10664			4.723	0.161992			40.159	1.3774				31.857	1.03568			10.617	0.34516			32.474	1.05574				25.32	0.618245			7.385	0.180322			26.809	0.654603
			33.752	1.15765			3.369	0.115552			36.611	1.25571				31.165	1.01318			10.263	0.333652			35.366	1.14975				38.561	0.941554			11.557	0.28219			11.673	0.285023
			30.56	1.04817			4.204	0.144191			40.444	1.38717				27.013	0.878197			13.241	0.430467			30.139	0.979824				32.256	0.787603			8.005	0.19546			27.894	0.681095
			23.774	0.815415			3.547	0.121657			33.507	1.14924				24.171	0.785803			6.295	0.204652			16.608	0.539929				3.471	0.0847524			15.921	0.388747			30.992	0.75674
			21.18	0.726445			5.083	0.17434			33.69	1.15552				24.237	0.787949			11.797	0.383522			32.99	1.07251				42.678	1.04208			16.736	0.408647			26.606	0.649646
			40.614	1.393			7.363	0.252541			36.322	1.24579				31.216	1.01484			8.651	0.281245			33.809	1.09914				32.05	0.782574			19.437	0.474598			27.003	0.65934
			41.533	1.42452			3.023	0.103685			53.513	1.83542				32.132	1.04462			9.156	0.297663			31.593	1.02709				35.408	0.864567			6.806	0.166184			28.051	0.684929
			51.969	1.78246			2.038	0.0699006			36.246	1.24319				29.876	0.971274			7.788	0.253189			32.02	1.04098				33.145	0.80931			11.601	0.283265			30.697	0.749537
			39.804	1.36522			6.302	0.21615			33.336	1.14338				24.119	0.784113			9.076	0.295062			29.461	0.957782				41.289	1.00816			5.234	0.1278			30.429	0.742993
			38.666	1.32619			1.707	0.0585477			40.052	1.37373				22.789	0.740874			4.187	0.13612			31.119	1.01168				28.088	0.685832			6.766	0.165207			27.024	0.659852
			27.658	0.948631			1.352	0.0463717			56.369	1.93338				27.63	0.898256			20.207	0.656933			34.643	1.12625				37.484	0.915257			22.154	0.54094			33.129	0.80892
			33.091	1.13498			2.635	0.0903768			25.204	0.864462				28.027	0.911163			6.608	0.214827			35.111	1.14146				49.297	1.2037			7.661	0.187061			27.207	0.664321
			30.236	1.03705			6.264	0.214847			34.843	1.19507				27.753	0.902255			19.768	0.642661			24.589	0.799393				24.487	0.597906			13.038	0.318352			33.277	0.812534
			25.498	0.874546			1.828	0.0626979			35.434	1.21534				29.271	0.951605			12.708	0.413139			28.408	0.923549				9.173	0.22398			6.474	0.158077			28.191	0.688347
			40.281	1.38158			2.587	0.0887305			36.537	1.25317				3.958	0.128675			1.748	0.0568278			27.149	0.882619				29.986	0.732176			6.908	0.168675			26.055	0.636192
			29.49	1.01147			1.98	0.0679113			36.209	1.24192				31.035	1.00895			16.575	0.538856			33.423	1.08659				40.319	0.98448			6.68	0.163107			26.269	0.641417
			39.772	1.36412			11.347	0.389186			41.166	1.41194				32.116	1.0441			24.218	0.787331			23.506	0.764184				28.065	0.685271			4.556	0.111245			28.872	0.704975
			43.555	1.49388			2.555	0.087633			32.161	1.10308				25.573	0.831383			20.549	0.668052			23.937	0.778196				35.769	0.873381			9.681	0.236384			27.877	0.68068
			40.132	1.37647			1.975	0.0677398			37.732	1.29416				20.654	0.671465			7.385	0.240088			33.359	1.08451				40.284	0.983625			6.425	0.156881			26.457	0.646008
			37.636	1.29086			2.644	0.0906855			20.903	0.716944				37.347	1.21416			7.392	0.240315			17.983	0.58463				35.336	0.862809			11.421	0.27887			35.54	0.86779
			42.891	1.4711			2.792	0.0957617			27.632	0.947739				23	0.747734			28.124	0.914316			34.572	1.12394				31.98	0.780864			7.764	0.189576			20.901	0.510345
			49.864	1.71027			5.107	0.175163			25.874	0.887442				33.476	1.08831			8.839	0.287357			24.741	0.804334				38.878	0.949295			6.839	0.16699			30.784	0.751661
			51.616	1.77036			4.184	0.143505			30.511	1.04648				32.98	1.07219			10.878	0.353646			25.952	0.843704				29.414	0.71821			8.522	0.208084			26.247	0.64088
			49.243	1.68897			4.67	0.160175			29.077	0.997301				33.429	1.08678			13.492	0.438627			30.324	0.985838				26.341	0.643175			24.039	0.586967			20.617	0.503411
			37.506	1.2864			7.803	0.267632			33.92	1.16341				28.9	0.939544			24.05	0.78187			27.184	0.883756				35.294	0.861783			4.421	0.107949			32.377	0.790558
			27.72	0.950758			2.423	0.0831055			35.771	1.2269				28.744	0.934472			13.776	0.44786			40.151	1.30532				31.258	0.763235			3.767	0.0919799			23.149	0.565235
			35.404	1.21431			2.198	0.0753883			36.277	1.24425				36.479	1.18594			23.279	0.756804			26.12	0.849166				32.693	0.798274			3.912	0.0955204			25.137	0.613777
			23.159	0.794322			7.686	0.263619			40.405	1.38584				37.51	1.21946			21.349	0.69406			28.881	0.938926				41.374	1.01024			6.136	0.149824			34.239	0.836023
			32.431	1.11234			4.576	0.15695			31.84	1.09207				42.709	1.38848			19.248	0.625756			26.243	0.853164				35.846	0.875261			6.566	0.160324			36.457	0.89018
			25.571	0.87705			2.382	0.0816993			40.613	1.39297				25.833	0.839835			4.832	0.157089			33.146	1.07758				34.971	0.853896			13.75	0.335737			30.653	0.748463
			51.963	1.78226			2.536	0.0869813			38.81	1.33113				24.321	0.79068			9.091	0.29555			38.197	1.24179				37.065	0.905026			4.116	0.100501			33.936	0.828624
			30.163	1.03455			0.93	0.0318977			44.352	1.52121				26.402	0.858334			32.199	1.0468			30.385	0.987822				36.351	0.887592			4.153	0.101405			21.972	0.536496
			25.832	0.886002			1.737	0.0595767			37.298	1.27927				25.274	0.821662			23.052	0.749424			35.604	1.15749				24.79	0.605304			4.073	0.0994515			28.855	0.70456
			36.001	1.23478			3.747	0.128517			36.738	1.26006				25.753	0.837234			6.364	0.206895			35.99	1.17004				30.191	0.737182			14.151	0.345529			24.122	0.588993
			23.448	0.804234			5.435	0.186413			23.91	0.82008				32.285	1.04959			14.74	0.4792			41.737	1.35688				39.032	0.953055			6.359	0.155269			40.588	0.991048
			27	0.926063			2.617	0.0897595			41.16	1.41173				31.25	1.01594			9.744	0.316779			30.721	0.998745				3.366	0.0821885			9.662	0.23592			34.539	0.843348
			37.012	1.26946			6.298	0.216013			36.797	1.26209				28.507	0.926767			13.069	0.424875			25.909	0.842306				32.519	0.794025			5.142	0.125554			27.64	0.674893
			47.804	1.63961			11.899	0.408119			32.378	1.11052				39.634	1.28851			7.168	0.233033			23.576	0.76646				38.122	0.930835			6.128	0.149629			22.618	0.55227
			28.692	0.984096			8.04	0.275761			37.684	1.29251				38.957	1.2665			8.592	0.279327			19.666	0.639345				33.573	0.819761			2.265	0.0553051			21.574	0.526778
			34.531	1.18437			2.973	0.10197			24.368	0.835789				20.751	0.674619			16.106	0.523609			29.66	0.964252				36.998	0.90339			14.015	0.342208			27.026	0.659901
			34.518	1.18392			3.692	0.12663			37.467	1.28507				33.847	1.10037			4.628	0.150457			31.061	1.0098				36.205	0.884027			3.558	0.0868766			25.183	0.6149
			39.042	1.33909			6.276	0.215258			34.356	1.17836				24.873	0.808625			9.616	0.312618			23.943	0.778391				27.145	0.662807			2.865	0.0699555			26.015	0.635215
			40.86	1.40144			1.513	0.0518938			30.612	1.04995				25.301	0.82254			17.493	0.5687			27.896	0.906904				35.494	0.866667			10.632	0.259604			25.131	0.61363
			28.367	0.972949			2.688	0.0921947			38.023	1.30414				24.622	0.800465			15.68	0.509759			22.632	0.73577				8.076	0.197194			3.087	0.0753761			26.009	0.635069
			29.265	1.00375			7.978	0.273634			45.517	1.56117				32.37	1.05235			14.461	0.47013			39.384	1.28038				33.528	0.818662			4.753	0.116055			18.082	0.441513
			34.558	1.18529			2.024	0.0694204			31.267	1.07241				21.205	0.689378			4.686	0.152343			27.44	0.892079				29.184	0.712594			7.042	0.171946			32.481	0.793097
			27.556	0.945133			10.127	0.347342			37.811	1.29686				24.815	0.80674			5.893	0.191582			32.69	1.06276				33.247	0.811801			12.201	0.297915			37.1	0.905881
			40.602	1.39259			5.594	0.191866			36.902	1.26569				26.746	0.869517			18.927	0.61532			33.998	1.10528				30.901	0.754518			4.314	0.105336			39.247	0.958305
			29.266	1.00378			2.6	0.0891764			42.127	1.4449				29.416	0.956319			7.66	0.249028			25.663	0.834309				35.528	0.867497			13.053	0.318719			38.329	0.93589
			45.263	1.55246			5.194	0.178147			48.4	1.66005				33.011	1.07319			27.156	0.882846			36.176	1.17609				29.583	0.722336			3.159	0.0771342			33.951	0.828991
			27.505	0.943383			4.474	0.153452			38.224	1.31103				34.452	1.12004			19.037	0.618896			33.644	1.09377				47.688	1.16441			9.727	0.237507			30.916	0.754884
			35.906	1.23153			8.113	0.278265			28.296	0.970514				27.54	0.89533			10.982	0.357027			29.123	0.946794				38.022	0.928393			5.572	0.136053			37.355	0.912107
			40.232	1.3799			2.919	0.100118			30.489	1.04573				35.665	1.15948			3.404	0.110665			26.428	0.859179				31.032	0.757717			11.316	0.276306			26.033	0.635655
			37.895	1.29975			1.323	0.0453771			35.86	1.22995				30.499	0.991528			12.238	0.397859			31.487	1.02365				4.393	0.107265			5.079	0.124015			25.175	0.614705
			37.316	1.27989			0.804	0.0275761			45.185	1.54978				27.927	0.907912			13.225	0.429947			26.566	0.863665				39.824	0.972393			27.278	0.666054			26.336	0.643053
			37.419	1.28342			1.439	0.0493557			29.059	0.996683				33.159	1.078			5.784	0.188039			29.875	0.971241				34.645	0.845936			3.156	0.0770609			20.317	0.496086
			31.018	1.06387			6.419	0.220163			39.34	1.34931				36.647	1.1914			9.161	0.297826			30.523	0.992308				24.846	0.606672			6.817	0.166453			21.466	0.524141
			34.491	1.18299			2.426	0.0832084			31.031	1.06432				24.452	0.794939			22.081	0.717857			32.88	1.06893				39.88	0.973761			16.752	0.409038			33.748	0.824034
			43.637	1.49669			3.315	0.1137			44.441	1.52426				36.407	1.1836			18.535	0.602576			43.669	1.41969				30.514	0.745069			4.001	0.0976935			24.943	0.60904
			33.473	1.14808			3.319	0.113837			26.755	0.917659				25.695	0.835349			1.623	0.052764			27.976	0.909505				35.332	0.862711			8.075	0.197169			30.575	0.746558
			37.146	1.27406			2.012	0.0690088			30.763	1.05513				27.119	0.881643			4.385	0.142557			25.765	0.837625				23.055	0.56294			9.145	0.223296			35.226	0.860123
			35.143	1.20536			8.003	0.274492			31.538	1.08171				34.849	1.13295			2.923	0.0950272			23.778	0.773027				33.048	0.806942			4.093	0.0999399			43.768	1.0687
			40.661	1.39462			4.592	0.157499			36.938	1.26692				21.494	0.698774			10.257	0.333457			28.255	0.918575				35.114	0.857388			12.925	0.315593			29.568	0.72197
			34.778	1.19284			4.42	0.1516			50.667	1.73781				23.446	0.762233			15.698	0.510345			28.521	0.927223				32.077	0.783233			3.495	0.0853384			34.622	0.845375
			25.014	0.857945			2.219	0.0761086			36.773	1.26126				28.201	0.916819			5.925	0.192623			24.755	0.804789				46.848	1.1439			17.473	0.426643			35.759	0.873137
			38.021	1.30407			6.977	0.239301			26.148	0.89684				25.971	0.844322			6.021	0.195744			36.653	1.1916				38.744	0.946023			11.465	0.279944			23.139	0.564991
			35.277	1.20995			1.818	0.0623549			35.17	1.20628				23.542	0.765354			18.749	0.609533			29.523	0.959798				35.995	0.8789			9.481	0.2315			26.966	0.658436
			41.303	1.41664			2.895	0.0992945			44.625	1.53058				24.75	0.804627			20.627	0.670587			34.878	1.13389				38.604	0.942604			3.297	0.0805037			28.269	0.690252
			33.174	1.13782			2.145	0.0735705			57.285	1.9648				27.243	0.885675			36.722	1.19384			39.916	1.29768				23.839	0.582083			4.686	0.114419			33.476	0.817393
			38.201	1.31024			1.537	0.052717			31.408	1.07725				23.089	0.750627			15.578	0.506443			25.806	0.838957				35.636	0.870134			7.226	0.176439			26.626	0.650134
			39.918	1.36913			8.405	0.28828			39.191	1.3442				31.641	1.02865			4.615	0.150034			5.056	0.164371				57.508	1.40419			19.266	0.470423			26.393	0.644445
			42.048	1.44219			3.672	0.125945			29.636	1.01647				22.084	0.717955			8.098	0.263267			30.891	1.00427				39.462	0.963554			7.571	0.184863			26.328	0.642858
			32.672	1.1206			2.032	0.0696948			43.778	1.50152				29.518	0.959635			4.87	0.158325			26.644	0.866201				33.319	0.813559			28.506	0.696039			26.208	0.639928
			32.485	1.11419			11.273	0.386648			35.634	1.2222				31.929	1.03802			6.531	0.212324			29.902	0.972119				33.147	0.809359			8.759	0.213871			21.055	0.514106
			32.668	1.12047			2.855	0.0979225			44.123	1.51336				26.471	0.860577			7.891	0.256538			26.906	0.874719				47.249	1.15369			3.721	0.0908567			28.642	0.699359
			28.533	0.978642			3.102	0.106394			35.135	1.20508				30.019	0.975923			16.443	0.534565			30.276	0.984278				26.832	0.655164			10.351	0.252743			28.321	0.691522
			35.394	1.21397			2.02	0.0692832			44.234	1.51716				19.272	0.626536			5.634	0.183162			26.048	0.846825				34.125	0.833239			7.118	0.173802			43.138	1.05331
			28.441	0.975487			6.102	0.20929			38.629	1.32492				35.284	1.14709			27.725	0.901345			34.926	1.13545				32.562	0.795075			6.635	0.162009			22.419	0.547411
			46.287	1.58758			2.373	0.0813906			42.718	1.46517				28.427	0.924167			11.161	0.362846			36.827	1.19725				23.975	0.585404			1.799	0.0439267			22.6	0.55183
			54.77	1.87853			3.759	0.128928			22.716	0.779127				27.839	0.905051			20.461	0.665191			32.775	1.06552				36.785	0.898189			10.543	0.257431			31.873	0.778252
			37.021	1.26977			3.283	0.112602			30	1.02896				35.124	1.14189			12.374	0.402281			33.13	1.07706				36.265	0.885492			8.526	0.208182			26.353	0.643468
			25.464	0.87338			4.61	0.158117			27.076	0.928669				30.909	1.00486			8.092	0.263072			23.638	0.768475				35.06	0.85607			9.858	0.240705			28.347	0.692156
			31.085	1.06617			3.155	0.108212			33.872	1.16176				27.31	0.887853			3.6	0.117037			38.332	1.24618				32.981	0.805306			18.118	0.442392			34.855	0.851064
			31.593	1.0836			5.329	0.182777			39.472	1.35383				32.882	1.069			21.344	0.693897			33.319	1.08321				27.663	0.675455			11.671	0.284974			35.153	0.85834
			38.975	1.33679			6.848	0.234877			40.521	1.38981				36.672	1.19221			5.047	0.164079			28.486	0.926085				42.927	1.04816			15.268	0.372803			26.479	0.646545
			44.377	1.52207			5.67	0.194473			33.415	1.14609				26.038	0.8465			34.791	1.13106			46.134	1.49982				37.254	0.909641			3.069	0.0749366			23.992	0.585819
			24.417	0.837469			1.722	0.0590622			31.382	1.07636				32.782	1.06575			26.472	0.860609			23.768	0.772702				47.528	1.1605			8.103	0.197853			31.009	0.757155
			34.388	1.17946			4.486	0.153864			32.819	1.12565				35.225	1.14517			24.592	0.79949			28.469	0.925532				45.514	1.11133			2.908	0.0710054			27.031	0.660023
			42.103	1.44407			3.826	0.131226			37.387	1.28232				26.698	0.867957			8.019	0.260699			41.157	1.33802				44.905	1.09646			2.765	0.0675137			36.036	0.879901
			39.137	1.34234			2.306	0.0790926			32.128	1.10195				34.634	1.12596			12.02	0.390772			35.161	1.14309				43.031	1.0507			10.135	0.247469			41.387	1.01056
			33.123	1.13607			4.397	0.150811			36.527	1.25283				35.293	1.14738			17.606	0.572374			28.84	0.937593				44.392	1.08393			1.809	0.0441708			31.095	0.759255
			35	1.20045			1.903	0.0652703			50.223	1.72258				37.547	1.22066			13.682	0.444804			33.432	1.08688				32.77	0.800154			3.391	0.082799			45.593	1.11326
			47.044	1.61354			6.294	0.215875			34.249	1.17469				22.619	0.735348			6.535	0.212454			22.557	0.733332				34.915	0.852529			20.1	0.490787			26.377	0.644054
			29.94	1.0269			1.151	0.0394777			30.214	1.0363				29.581	0.961683			11.568	0.376078			33.718	1.09618				38.586	0.942165			3.678	0.0898067			25.796	0.629868
			32.355	1.10973			2.808	0.0963105			34.986	1.19997				31.061	1.0098			6.843	0.222467			42.483	1.38113				36.611	0.893941			3.34	0.0815537			29.051	0.709346
			38.406	1.31727			5.41	0.185555			32.216	1.10496				28.849	0.937886			4.249	0.138136			27.633	0.898354				32.307	0.788849			10.716	0.261655			28.714	0.701118
			26.884	0.922084			4.892	0.167789			34.821	1.19431				24.478	0.795784			31.106	1.01126			38.69	1.25782				38.763	0.946487			3.627	0.0885614			31.641	0.772587
			37.104	1.27262			2.59	0.0888334			43.001	1.47487				29.666	0.964447			26.467	0.860447			27.098	0.880961				39.097	0.954642			9.492	0.231769			26.313	0.642492
			55.698	1.91036			4.903	0.168166			39.212	1.34492				21.633	0.703293			7.984	0.259561			31.698	1.03051				37.972	0.927173			19.602	0.478627			28.082	0.685686
			24.008	0.823441			9.549	0.327517			41.142	1.41111				27.763	0.90258			19.452	0.632388			38.19	1.24156				44.235	1.0801			4.456	0.108803			25.405	0.620321
			43.639	1.49676			3.475	0.119188			24.223	0.830815				18.776	0.610411			4.853	0.157772			36.37	1.18239				32.373	0.79046			2.436	0.0594805			24.077	0.587895
			45.847	1.57249			4.033	0.138326			27.387	0.939336				32.439	1.0546			4.456	0.144865			26.531	0.862527				37.232	0.909104			3.226	0.0787701			41.756	1.01957
			32.855	1.12688			3.474	0.119153			37.433	1.2839				23.202	0.754301			14.614	0.475104			22.585	0.734242				35.907	0.876751			4.043	0.098719			36.668	0.895332
			43.485	1.49148			3.339	0.114523			40.979	1.40552				34.565	1.12371			9.426	0.306441			22.073	0.717597				33.577	0.819859			14.132	0.345065			21.67	0.529122
			31.844	1.0922			8.61	0.295311			38.196	1.31007				27.049	0.879368			3.715	0.120775			28.568	0.928751				32.036	0.782232			1.473	0.0359666			37.886	0.925073
			46.643	1.59979			4.013	0.13764			44.296	1.51929				30.097	0.978459			38.578	1.25418			46.065	1.49758				33.766	0.824474			2.631	0.0642418			37.074	0.905246
			26.347	0.903666			6.131	0.210285			30.942	1.06127				33.409	1.08613			5.436	0.176725			37.071	1.20518				44.31	1.08193			1.775	0.0433407			29.968	0.731737
			47.174	1.618			3.778	0.12958			32.225	1.10527				31.449	1.02241			13.837	0.449843			47.967	1.55942				44.968	1.098			7.087	0.173045			25.568	0.624301
			19.945	0.684086			5.374	0.184321			36.035	1.23595				34.998	1.13779			16.696	0.54279			42.726	1.38903				32.696	0.798347			3.324	0.081163			22.796	0.556616
			38.08	1.30609			4.96	0.170121			35.933	1.23245				32.549	1.05817			28.462	0.925304			20.324	0.660737				32.424	0.791706			12.997	0.317351			25.715	0.62789
			30.537	1.04738			1.56	0.0535058			38.694	1.32715				24.331	0.791005			9.197	0.298996			32.817	1.06689				32.465	0.792707			21.237	0.51855			20.017	0.488761
			28.221	0.967941			4.295	0.147313			35.281	1.21009				32.211	1.04719			12.199	0.396592			32.096	1.04345				40.216	0.981965			3.157	0.0770853			37.401	0.91323
			26.817	0.919786			2.907	0.0997061			37.146	1.27406				29.039	0.944063			13.139	0.427151			25.352	0.824198				42.319	1.03331			5.817	0.142035			24.994	0.610285
			23.882	0.819119			5.363	0.183943			32.836	1.12623				26.825	0.872085			4.246	0.138038			38.828	1.2623				53.114	1.2969			3.386	0.0826769			34.247	0.836218
			19.942	0.683983			7.107	0.24376			35.904	1.23146				34.034	1.10645			5.329	0.173247			31.529	1.02501				48.475	1.18363			3.534	0.0862906			26.672	0.651257
			24.58	0.84306			3.817	0.130918			39.179	1.34379				26.152	0.850206			33.023	1.07358			47.136	1.5324				40.382	0.986018			3.057	0.0746436			22.341	0.545506
			26.587	0.911897			7.977	0.2736			27.178	0.932168				25.074	0.81516			2.32	0.0754236			40.29	1.30983				37.233	0.909128			4.506	0.110024			30.684	0.74922
			39.4	1.35137			7.243	0.248425			41.269	1.41547				28.686	0.932587			2.769	0.0900207			31.34	1.01887				45.031	1.09953			1.906	0.0465393			26.902	0.656873
			35.892	1.23105			7.099	0.243486			39.805	1.36526				32.587	1.05941			3.217	0.104585			38.45	1.25002				34.66	0.846303			3.952	0.0964971			28.177	0.688005
			46.571	1.59732			4.632	0.158871			34.082	1.16897				26.881	0.873906			28.878	0.938829			43.606	1.41764				43.514	1.06249			4.86	0.118668			25.73	0.628256
			28.943	0.992705			5.127	0.175849			31.516	1.08096				28.545	0.928003			8.713	0.283261			41.481	1.34855				46.507	1.13557			9.722	0.237385			27.818	0.67924
			30.483	1.04552			10.071	0.345421			37.568	1.28853				33.921	1.10278			11.155	0.362651			43.914	1.42765				39.05	0.953494			1.982	0.048395			30.194	0.737255
			28.468	0.976413			10.804	0.370562			38.616	1.32448				30.841	1.00265			27.037	0.878978			26.471	0.860577				34.328	0.838196			2.399	0.058577			27.883	0.680827
			30.713	1.05341			6.243	0.214126			24.915	0.85455				31.914	1.03753			8.714	0.283294			42.45	1.38006				50.905	1.24296			2.183	0.0533029			26.223	0.640294
			33.403	1.14568			3.158	0.108315			24.381	0.836234				24.964	0.811584			21.609	0.702512			27.872	0.906123				44.598	1.08896			1.385	0.0338179			27.759	0.677799
			37.585	1.28911			4.007	0.137435			41.13	1.4107				27.167	0.883204			26.095	0.848353			32.906	1.06978				29.072	0.709859			3.717	0.090759			30.016	0.732909
			35.644	1.22254			2.776	0.0952129			35.276	1.20992				30.215	0.982295			13.788	0.44825			40.354	1.31192				40.939	0.999619			2.004	0.0489322			24.001	0.586039
			1.104	0.0378657			7.63	0.261698			32.129	1.10198				21.981	0.714606			10.241	0.332937			43.048	1.3995				33.802	0.825353			2.783	0.0679533			29.831	0.728392
			32.333	1.10898			1.775	0.06088			43.053	1.47666				30.646	0.996307			4.589	0.149189			33.471	1.08815				38.739	0.945901			1.554	0.0379444			30.181	0.736938
			34.222	1.17377			12.577	0.431374			53.605	1.83858				36.353	1.18184			12.322	0.40059			25.533	0.830082				38.65	0.943728			2.433	0.0594072			36.585	0.893306
			30.626	1.05043			8.378	0.287354			35.316	1.21129				30.839	1.00258			13.038	0.423868			24.049	0.781837				44.073	1.07614			6.017	0.146919			34.123	0.833191
			27.408	0.940056			4.605	0.157945			57.541	1.97358				30.928	1.00547			17.078	0.555209			47.732	1.55178				33.193	0.810482			4.514	0.11022			26.061	0.636339
			34.597	1.18663			6.767	0.232099			47.726	1.63694				33.558	1.09098			17.292	0.562166			30.395	0.988147				44.034	1.07519			1.881	0.0459289			29.098	0.710494
			40.43	1.38669			11.7	0.401294			35.491	1.21729				30.568	0.993771			2.523	0.0820232			41.926	1.36302				32.689	0.798176			2.578	0.0629477			35.154	0.858365
			32.001	1.09759			4.744	0.162713			35.499	1.21757				35.657	1.15922			21.526	0.699814			30.339	0.986326				41.891	1.02286			2.515	0.0614094			22.346	0.545628
			37.674	1.29217			5.132	0.17602			33.205	1.13889				28.852	0.937983			16.996	0.552543			37.846	1.23038				30.049	0.733715			3.464	0.0845814			30.783	0.751637
			35.777	1.2271			7.569	0.259606			38.119	1.30743				24.212	0.787136			5.513	0.179229			34.466	1.1205				51.372	1.25436			5.907	0.144233			31.11	0.759621
			35.672	1.2235			6.705	0.229972			40.088	1.37496				28.662	0.931807			2.928	0.0951898			36.806	1.19657				48.457	1.18319			2.858	0.0697846			24.544	0.599298
			32.168	1.10332			6.834	0.234397			31.621	1.08456				29.165	0.948159			13.752	0.44708			24.25	0.788372				40.951	0.999912			2.862	0.0698822			22.555	0.550732
			37.052	1.27083			6.053	0.207609			37.395	1.2826				32.116	1.0441			14.787	0.480728			25.087	0.815583				60.989	1.48918			1.698	0.0414605			27.309	0.666811
			42.318	1.45145			5.218	0.17897			35.768	1.22679				39.791	1.29361			16.698	0.542855			30.525	0.992373				32.702	0.798494			2.437	0.0595049			25.412	0.620492
			37.027	1.26997			3.314	0.113666			46.548	1.59653				28.852	0.937983			12.451	0.404784			40.916	1.33019				33.285	0.812729			3.347	0.0817246			22.324	0.545091
			39.975	1.37109			3.081	0.105674			1.966	0.0674311				29.025	0.943608			18.36	0.596887			32.431	1.05434				31.089	0.759109			2.512	0.0613362			35.163	0.858584
			35.578	1.22028			4.081	0.139973			31.503	1.08051				29.54	0.96035			5.676	0.184528			44.165	1.43581				31.264	0.763382			4.312	0.105287			24.479	0.59771
			31.69	1.08692			6.986	0.23961			35.74	1.22583				26.126	0.849361			28.588	0.929401			29.961	0.974037				40.089	0.978864			3.864	0.0943483			31.67	0.773295
			40.162	1.3775			5.433	0.186344			33.573	1.15151				28.76	0.934993			20.758	0.674846			29.496	0.95892				38.023	0.928418			5.976	0.145918			41.013	1.00143
			30.998	1.06319			3.031	0.103959			32.342	1.10929				27.019	0.878392			13.385	0.435149			26.058	0.84715				35.399	0.864347			5.436	0.132732			24.219	0.591362
			26.281	0.901402			8.59	0.294625			21.077	0.722912				25.649	0.833853			10.988	0.357222			45.517	1.47977				34.4	0.839954			5.366	0.131023			25.899	0.632383
			27.406	0.939988			4.537	0.155613			41.531	1.42446				31.293	1.01734			20.36	0.661907			25.251	0.820914				41.315	1.0088			4.106	0.100257			37.573	0.91743
			25.527	0.875541			11.839	0.406061			51.726	1.77413				25.466	0.827904			6.133	0.199385			34.41	1.11867				42.1	1.02797			6.041	0.147505			29.184	0.712594
			24.775	0.849748			5.111	0.1753			39.283	1.34735				29.777	0.968055			12.941	0.420714			39.902	1.29722				41.715	1.01857			13.674	0.333882			25.081	0.61241
			33.884	1.16217			2.925	0.100323			33.143	1.13676				22.723	0.738729			13.582	0.441553			47.055	1.52977				26.058	0.636265			2.833	0.0691741			43.703	1.06711
			24.631	0.844809			4.941	0.169469			36.371	1.24747				30.547	0.993088			4.419	0.143662			35.5	1.15411				36.848	0.899728			1.408	0.0343795			25.432	0.62098
			33.768	1.1582			7.117	0.244103			50.085	1.71785				29.333	0.953621			7.77	0.252604			20.593	0.669482				38.458	0.939039			3.373	0.0823595			31.877	0.778349
			28.711	0.984747			8.344	0.286188			30.898	1.05976				30.473	0.990682			31.874	1.03623			24.412	0.793638				30.615	0.747535			6.755	0.164939			29.945	0.731175
			26.681	0.915121			6.932	0.237758			43.887	1.50526				34.234	1.11295			4.061	0.132024			32.661	1.06181				43.484	1.06176			2.788	0.0680754			28.346	0.692132
			31.198	1.07005			7.008	0.240365			48.872	1.67624				41.729	1.35662			5.052	0.164241			46.905	1.52489				46.162	1.12715			6.101	0.14897			37.263	0.909861
			27.016	0.926611			4.554	0.156196			45.002	1.54351				27.253	0.886			3.293	0.107056			32.583	1.05928				42.094	1.02782			2.42	0.0590898			41.186	1.00565
			34.456	1.18179			0.987	0.0338527			32.113	1.10143				24.639	0.801018			28.57	0.928816			36.156	1.17544				26.837	0.655286			4.932	0.120426			34.044	0.831262
			25.378	0.87043			3.162	0.108452			35.26	1.20937				26.161	0.850499			23.502	0.764054			33.764	1.09767				38.128	0.930982			9.046	0.220879			3.409	0.0832385
			26.124	0.896017			5.846	0.20051			35.66	1.22309				21.332	0.693507			14.142	0.459759			26.379	0.857586				46.223	1.12864			2.961	0.0722995			45.43	1.10928
			30.252	1.0376			3.854	0.132187			35.053	1.20227				20.952	0.681153			16.361	0.531899			37.108	1.20639				40.441	0.987459			3.582	0.0874627			35.025	0.855215
			29.947	1.02714			8.988	0.308276			46.882	1.60799				32.525	1.05739			19.63	0.638175			34.889	1.13425				39.922	0.974786			8.437	0.206009			34.292	0.837317
			32.13	1.10201			4.233	0.145186			35.113	1.20433				31.989	1.03997			10.311	0.335212			37.516	1.21965				34.586	0.844496			2.875	0.0701997			34.991	0.854385
			28.465	0.97631			5.212	0.178764			31.968	1.09646				25.757	0.837364			4.126	0.134137			38.312	1.24553				37.51	0.915892			8.461	0.206595			29.296	0.715328
			34.732	1.19126			3.302	0.113254			32.682	1.12095				32.149	1.04517			9.757	0.317202			42.345	1.37664				28.401	0.693475			8.441	0.206106			28.145	0.687224
			4.176	0.143231			6.757	0.231756			37.049	1.27073				28.913	0.939967			2.331	0.0757812			37.184	1.20886				31.939	0.779863			6.782	0.165598			32.96	0.804793
			36.723	1.25955			6.338	0.217385			41.289	1.41616				18.375	0.597374			14.166	0.460539			32.583	1.05928				35.282	0.86149			7.943	0.193946			24.43	0.596514
			27.943	0.958406			5.648	0.193719			46.333	1.58916				26.592	0.86451			11.425	0.371429			38.223	1.24264				29.17	0.712252			1.749	0.0427058			37.347	0.911912
			24.109	0.826905			11.19	0.383801			28.524	0.978334				24.367	0.792175			28.134	0.914641			34.743	1.1295				38.771	0.946682			5.664	0.138299			23.886	0.583231
			41.817	1.43427			3.923	0.134553			39.122	1.34183				31.938	1.03831			3.939	0.128058			22.732	0.739021				39.123	0.955277			6.059	0.147944			25.339	0.618709
			27.459	0.941806			6.641	0.227777			32.356	1.10977				27.188	0.883887			14.5	0.471397			31.678	1.02986				37.747	0.921679			5.737	0.140082			35.592	0.869059
			27.196	0.932785			4.912	0.168475			32.942	1.12986				23.095	0.750822			35.412	1.15125			40.504	1.31679				46.906	1.14532			3.576	0.0873162			30.579	0.746656
			36.862	1.26432			11.076	0.379891			38.732	1.32845				23.573	0.766362			24.346	0.791493			27.67	0.899556				29.566	0.721921			4.474	0.109243			31.211	0.762087
			35.696	1.22432			8.589	0.294591			29.031	0.995723				25.547	0.830537			10.109	0.328645			38.048	1.23695				31.972	0.780669			2.587	0.0631675			36.481	0.890766
			31.602	1.0839			9.976	0.342163			38.589	1.32355				28.228	0.917697			34.888	1.13421			42.182	1.37134				33.026	0.806405			7.303	0.178319			35.634	0.870085
			39.845	1.36663			4.534	0.15551			28.238	0.968524				30.209	0.9821			13.781	0.448023			24.925	0.810316				27.336	0.667471			5.785	0.141254			30.968	0.756154
			30.982	1.06264			7.266	0.249214			26.23	0.899653				38.245	1.24335			5.375	0.174742			26.659	0.866689				41.329	1.00914			4.015	0.0980353			31.184	0.761428
			40.048	1.37359			9.201	0.315582			40.27	1.38121				29.387	0.955376			12.342	0.401241			32.368	1.05229				30.178	0.736864			6.87	0.167747			28.559	0.697333
			27.747	0.951684			4.089	0.140247			47.772	1.63851				33.893	1.10187			22.779	0.740549			37.845	1.23035				28.187	0.68825			2.598	0.0634361			29.854	0.728953
			40.32	1.38292			7.468	0.256142			37.338	1.28064				28.436	0.924459			22.315	0.725464			41.289	1.34231				18.041	0.440512			2.453	0.0598956			27.124	0.662294
			47.997	1.64623			7.077	0.242731			41.164	1.41187				21.405	0.69588			11.318	0.36795			29.229	0.95024				32.484	0.793171			4.286	0.104652			37.259	0.909763
			29.562	1.01394			6.903	0.236763			41.67	1.42922				24.697	0.802904			23.935	0.778131			23.295	0.757324				22.428	0.547631			2.292	0.0559644			29.995	0.732396
			24.099	0.826562			5.984	0.205243			49.061	1.68272				31.638	1.02856			2.677	0.0870297			36.095	1.17345				40.095	0.97901			5.463	0.133392			36.644	0.894746
			26.488	0.908502			5.983	0.205209			43.305	1.4853				25.395	0.825596			11.957	0.388724			27.676	0.899752				39.424	0.962626			4.786	0.116861			1.733	0.0423151
			31.151	1.06844			3.324	0.114009			37.107	1.27272				32.03	1.0413			29.218	0.949882			32.254	1.04858				47.559	1.16126			6.485	0.158346			25.086	0.612532
			29.354	1.0068			6.109	0.20953			29.528	1.01277				25.167	0.818183			4.757	0.154651			52.495	1.70662				36.412	0.889082			2.171	0.0530099			33.606	0.820567
			29.552	1.01359			7.521	0.25796			32.571	1.11714				38.779	1.26071			8.419	0.273703			31.704	1.0307				23.479	0.573293			6.402	0.156319			33.33	0.813828
			34.949	1.1987			6.019	0.206443			38.954	1.33607				30.026	0.97615			23.089	0.750627			38.508	1.2519				41.925	1.02369			3.863	0.0943239			28.843	0.704267
			38.53	1.32153			1.744	0.0598168			40.742	1.39739				24.913	0.809926			3.924	0.12757			33.303	1.08269				23.364	0.570485			6.304	0.153926			35.354	0.863248
			23.394	0.802382			5.597	0.191969			27.344	0.937861				25.688	0.835121			13.395	0.435474			38.589	1.25454				41.914	1.02343			3.009	0.0734716			31.808	0.776665
			36.158	1.24017			5.034	0.172659			43.934	1.50688				24.074	0.78265			3.452	0.112225			29.228	0.950207				39.622	0.967461			3.789	0.092517			22.776	0.556128
			27.393	0.939542			3.197	0.109653			28.276	0.969828				32.26	1.04878			2.064	0.067101			29.492	0.95879				37.191	0.908103			1.748	0.0426814			35.351	0.863175
			31.15	1.0684			3.726	0.127797			48.286	1.65614				26.495	0.861357			15.509	0.5042			30.742	0.999428				45.352	1.10737			5.275	0.128801			31.461	0.768192
			27.153	0.93131			5.183	0.17777			29.317	1.00553				28.274	0.919193			10.023	0.325849			38.991	1.2676				41.324	1.00902			4.426	0.108071			27.951	0.682487
			30.207	1.03606			14.162	0.485737			47.673	1.63512				37.68	1.22498			21.738	0.706706			28.005	0.910447				53.69	1.31096			1.348	0.0329145			35.271	0.861222
			27.594	0.946436			3.593	0.123235			54.27	1.86139				30.318	0.985643			12.842	0.417496			38.928	1.26556				46.202	1.12813			3.452	0.0842884			27.39	0.668789
			35.649	1.22271			5.013	0.171939			37.291	1.27903				35.361	1.14959			24.385	0.792761			36.035	1.1715				47.235	1.15335			3.64	0.0888789			28.668	0.699994
			26.105	0.895365			5.858	0.200921			37.695	1.29289				22.631	0.735738			11.291	0.367072			31.415	1.02131				58.044	1.41728			6.308	0.154024			25.071	0.612165
			33.097	1.13518			3.332	0.114283			40.794	1.39918				27.573	0.896403			5.636	0.183227			34.663	1.1269				35.71	0.871941			6.012	0.146797			31.219	0.762283
			32.33	1.10887			20.922	0.717596			40.247	1.38042				28.87	0.938569			9.857	0.320453			36.782	1.19579				37.5	0.915648			1.922	0.04693			28.732	0.701557
			28.045	0.961905			5.461	0.187305			42.016	1.44109				23.035	0.748872			2.49	0.0809503			26.979	0.877092				40.715	0.994149			5.206	0.127116			27.712	0.676651
			34.852	1.19538			9.215	0.316062			39.169	1.34344				34.873	1.13373			6.159	0.20023			33.888	1.1017				38.147	0.931446			3.831	0.0935426			27.656	0.675284
			35.667	1.22333			5.867	0.20123			27.466	0.942046				34.43	1.11933			27.39	0.890454			31.947	1.0386				31.842	0.777495			13.498	0.329584			31.908	0.779106
			23.514	0.806498			5.109	0.175232			42.178	1.44665				28.029	0.911228			13.915	0.452379			44.799	1.45642				48.591	1.18646			1.915	0.0467591			29.324	0.716012
			24.668	0.846078			6.346	0.217659			46.319	1.58868				35.728	1.16152			20.413	0.66363			36.614	1.19033				36.019	0.879486			4.161	0.1016			39.086	0.954373
			28.487	0.977065			7.549	0.25892			51.67	1.77221				26.335	0.856155			2.136	0.0694417			33.714	1.09605				52.599	1.28432			13.356	0.326117			24.333	0.594145
			23.954	0.821589			6.578	0.225616			40.267	1.3811				37.684	1.22511			4.069	0.132284			34.999	1.13782				49.631	1.21185			3.519	0.0859244			32.064	0.782915
			29.864	1.02429			2.983	0.102313			25.068	0.859798				32.641	1.06116			2.478	0.0805602			41.609	1.35272				35.709	0.871916			3.275	0.0799666			30.551	0.745972
			25.593	0.877804			3.722	0.127659			42.606	1.46133				32.503	1.05668			30.578	0.994096			38.988	1.26751				44.475	1.08596			4.06	0.0991341			26.993	0.659095
			31.938	1.09543			5.911	0.202739			37.207	1.27615				30.653	0.996534			3.887	0.126367			33.039	1.0741				43.759	1.06848			6.062	0.148017			32.14	0.784771
			30.133	1.03352			4.203	0.144157			42.403	1.45436				30.79	1.00099			12.769	0.415122			38.064	1.23747				40.24	0.982551			6.494	0.158566			29.894	0.72993
			36.697	1.25866			3.982	0.136577			38.849	1.33247				21.559	0.700887			16.871	0.548479			32.237	1.04803				43.47	1.06142			3.045	0.0743506			34.882	0.851723
			43.381	1.48791			3.682	0.126287			46.121	1.58189				31.011	1.00817			10.838	0.352345			31.461	1.0228				44.666	1.09062			2.161	0.0527657			24.936	0.608869
			36.671	1.25776			3.901	0.133799			48.031	1.6474				18.968	0.616653			6.616	0.215087			31.105	1.01123				36.927	0.901657			7.07	0.17263			30.234	0.738232
			24.685	0.846661			15.667	0.537356			36.852	1.26397				27.501	0.894062			7.019	0.228189			38.482	1.25106				35.22	0.859976			4.993	0.121915			35.893	0.876409
			36.19	1.24127			6.241	0.214058			37.02	1.26973				36.725	1.19394			30.503	0.991658			28.213	0.917209				50.369	1.22987			8.856	0.216239			26.992	0.659071
			36.573	1.2544			13.564	0.465226			40.052	1.37373				40.573	1.31904			25.133	0.817078			25.449	0.827351				61.041	1.49045			5.742	0.140204			29.481	0.719846
			36.583	1.25475			5.976	0.204969			44.847	1.53819				37.427	1.21676			11.359	0.369283			27.759	0.90245				50.946	1.24396			11.716	0.286073			34.176	0.834485
			23.978	0.822412			13.349	0.457852			49.427	1.69528				29.67	0.964577			12.631	0.410636			40.545	1.31812				42.029	1.02623			34.759	0.84872			30.39	0.742041
			32.706	1.12177			4.305	0.147656			52.534	1.80184				25.574	0.831415			4.644	0.150977			30.503	0.991658				45.859	1.11975			7.903	0.19297			40.116	0.979523
			28.472	0.97655			3.941	0.135171			43.407	1.4888				27.101	0.881058			12.312	0.400265			36.161	1.1756				41.032	1.00189			2.906	0.0709566			36.806	0.898702
			25.558	0.876604			18.132	0.621902			50.889	1.74542				22.244	0.723156			13.695	0.445227			50.498	1.6417				42.082	1.02753			4.314	0.105336			31.695	0.773905
			22.814	0.782489			3.522	0.1208			44.31	1.51977				29.655	0.964089			4.901	0.159332			31.154	1.01282				48.637	1.18758			5.762	0.140692			34.437	0.840858
			23.154	0.79415			11.098	0.380646			42.482	1.45707				26.781	0.870655			4.728	0.153708			40.766	1.32531				50.564	1.23463			3.564	0.0870231			24.077	0.587895
			42.499	1.45766			3.804	0.130472			46.744	1.60325				30.529	0.992503			8.771	0.285147			39.377	1.28015				24.551	0.599468			9.086	0.221855			28.987	0.707783
			40.685	1.39544			4.263	0.146215			46.21	1.58494				24.648	0.801311			20.348	0.661517			33.384	1.08532				37.164	0.907443			2.504	0.0611408			29.811	0.727903
			25.537	0.875884			7.224	0.247773			39.466	1.35363				25.549	0.830602			5.509	0.179099			25.025	0.813567				43.792	1.06928			5.391	0.131634			40.572	0.990658
			40.734	1.39712			3.724	0.127728			42.401	1.4543				33.785	1.09836			32.199	1.0468			32.979	1.07215				51.345	1.2537			12.786	0.312199			39.411	0.962309
			40.561	1.39119			3.802	0.130403			36.235	1.24281				28.944	0.940974			33.423	1.08659			33.185	1.07885				53.598	1.30872			3.995	0.097547			40.793	0.996054
			29.302	1.00502			7.154	0.245372			42.381	1.45361				28.945	0.941007			6.842	0.222435			28.529	0.927483				30.148	0.736132			4.254	0.103871			31.19	0.761575
			34.089	1.16921			6.019	0.206443			51.965	1.78233				36.281	1.1795			18.554	0.603194			34.806	1.13155				46.477	1.13484			2.859	0.069809			28.11	0.686369
			26.049	0.893445			3.299	0.113151			45.142	1.54831				39.251	1.27606			4.581	0.148929			30.788	1.00092				50.512	1.23337			8.44	0.206082			26.77	0.65365
			34.009	1.16646			5.74	0.196874			35.747	1.22607				34.176	1.11107			3.431	0.111542			35.162	1.14312				61.641	1.5051			4.863	0.118741			25.264	0.616878
			32.462	1.1134			3.224	0.110579			62.014	2.12699				27.67	0.899556			5.445	0.177018			33.936	1.10327				39.86	0.973272			13.88	0.338912			28.32	0.691497
			26.782	0.918585			5.488	0.188231			29.778	1.02134				24.613	0.800173			8.388	0.272695			40.172	1.306				50.522	1.23361			4.46	0.108901			24.254	0.592216
			35.023	1.20124			4.392	0.15064			45.994	1.57753				26.011	0.845622			15.235	0.495292			28.685	0.932554				55.196	1.34774			5.779	0.141107			30.029	0.733226
			24.925	0.854893			4.232	0.145152			41.791	1.43337				32.972	1.07193			23.348	0.759047			39.87	1.29618				36.746	0.897237			4.861	0.118692			31.641	0.772587
			38.742	1.3288			18.157	0.62276			42.508	1.45797				31.358	1.01945			7.215	0.234561			27.722	0.901247				45.525	1.1116			6.394	0.156124			43.982	1.07392
			37.849	1.29817			3.511	0.120422			43.53	1.49302				28.621	0.930474			22.073	0.717597			38.784	1.26087				35.051	0.85585			7.504	0.183227			26.745	0.65304
			31.028	1.06422			5.965	0.204591			37.022	1.2698				30.302	0.985123			4.521	0.146978			30.039	0.976573				25.024	0.611018			4.866	0.118814			33.45	0.816758
			29.806	1.0223			9.44	0.323779			46.116	1.58171				37.485	1.21864			6.007	0.195289			46.811	1.52183				36.08	0.880975			3.616	0.0882929			33.648	0.821592
			30.643	1.05101			12.646	0.43374			41.405	1.42013				27.181	0.883659			28.361	0.922021			35.061	1.13984				48.959	1.19545			6.982	0.170481			22.251	0.543309
			50.789	1.74199			4.039	0.138532			36.654	1.25718				21.888	0.711583			3.897	0.126692			39.652	1.28909				54.581	1.33272			9.06	0.22122			33.787	0.824986
			39.834	1.36625			6.646	0.227949			45.581	1.56337				29.319	0.953166			21.313	0.692889			24.231	0.787754				33.784	0.824913			3.484	0.0850698			32.475	0.792951
			27.747	0.951684			3.549	0.121726			43.803	1.50238				33.468	1.08805			1.298	0.0421982			28.49	0.926215				34.991	0.854385			5.024	0.122672			28.424	0.694037
			29.233	1.00265			4.197	0.143951			38.606	1.32413				31.873	1.0362			16.952	0.551112			41.098	1.3361				76.582	1.86992			16.486	0.402543			36.269	0.88559
			35.393	1.21393			5.303	0.181886			48.986	1.68015				31.963	1.03912			11.325	0.368178			33.838	1.10008				60.929	1.48772			6.012	0.146797			44.634	1.08984
			24.514	0.840796			6.796	0.233093			32.499	1.11467				25.668	0.834471			6.295	0.204652			36.78	1.19572				47.112	1.15035			3.47	0.0847279			40.936	0.999545
			34.863	1.19575			2.843	0.097511			48.918	1.67782				28.537	0.927743			5.454	0.17731			1.016	0.0330303				46.545	1.1365			6.681	0.163132			22.349	0.545702
			27.28	0.935666			7.578	0.259915			42.568	1.46002				32.632	1.06087			10.043	0.3265			38.932	1.26569				35.453	0.865665			1.569	0.0383107			21.93	0.535471
			19.576	0.67143			4.295	0.147313			33.66	1.15449				20.941	0.680795			6.239	0.202831			37.041	1.20421				46.669	1.13953			5.269	0.128655			30.808	0.752247
			28.28	0.969965			10.452	0.358489			47.487	1.62874				29.985	0.974817			13.211	0.429492			36.061	1.17235				38.603	0.94258			12.182	0.297451			26.132	0.638072
			31.483	1.07982			6.259	0.214675			37.41	1.28311				34.595	1.12469			5.43	0.17653			36.144	1.17505				44.905	1.09646			7.111	0.173631			25.826	0.6306
			27.402	0.939851			10.947	0.375467			46.911	1.60898				37.636	1.22355			20.527	0.667336			35.855	1.16565				46.222	1.12862			7.488	0.182837			27.299	0.666567
			23.612	0.809859			7.453	0.255628			38.714	1.32784				29.361	0.954531			32.013	1.04075			36.842	1.19774				48.757	1.19051			5.857	0.143012			28.532	0.696674
			24.925	0.854893			3.69	0.126562			36.22	1.2423				32.617	1.06038			9.722	0.316064			31.855	1.03561				45.035	1.09963			2.392	0.0584061			32.419	0.791583
			25.268	0.866657			18.211	0.624612			40.153	1.37719				41.59	1.3521			17.191	0.558882			45.554	1.48097				47.155	1.1514			6.412	0.156564			35.964	0.878143
			30.454	1.04453			7.958	0.272948			28.509	0.977819				30.273	0.98418			21.764	0.707551			33.907	1.10232				46.982	1.14717			10.724	0.261851			29.741	0.726194
			28.409	0.974389			10.588	0.363154			26.943	0.924107				33.517	1.08964			24.282	0.789412			25.856	0.840583				39.059	0.953714			6.359	0.155269			24.534	0.599053
			37.635	1.29083			5.118	0.17554			38.561	1.32259				28.408	0.923549			4.143	0.13469			36.628	1.19078				77.671	1.89651			11.974	0.292372			28.707	0.700947
			47.684	1.63549			7.234	0.248116			32.087	1.10054				36.718	1.19371			12.771	0.415187			32.088	1.04319				47.94	1.17056			15.91	0.388479			30.127	0.735619
			29.337	1.00622			3.903	0.133867			30.059	1.03098				28.024	0.911065			3.091	0.100489			33.074	1.07524				41.819	1.02111			13.437	0.328095			22.274	0.54387
			25.488	0.874203			5.724	0.196325			30.819	1.05705				37.914	1.23259			2.855	0.0928165			22.954	0.746238				44.54	1.08755			8.71	0.212674			28.614	0.698676
			39.218	1.34512			10.308	0.35355			33.366	1.14441				28.175	0.915974			15.049	0.489246			45.438	1.4772				51.242	1.25119			7.597	0.185498			22.618	0.55227
			26.958	0.924622			8.956	0.307178			34.296	1.17631				24.827	0.80713			5.954	0.193566			34.503	1.1217				41.358	1.00985			8.917	0.217729			37.674	0.919896
			32.24	1.10579			8.747	0.30001			36.932	1.26672				25.082	0.81542			11.215	0.364602			38.992	1.26764				40.521	0.989412			16.172	0.394876			32.174	0.785601
			29.622	1.01599			5.514	0.189123			36.323	1.24583				35.957	1.16897			4.002	0.130106			31.771	1.03288				35.887	0.876263			5.618	0.137176			40.76	0.995248
			31.221	1.07084			6.775	0.232373			26.142	0.896634				27.469	0.893022			15.055	0.489441			35.7	1.16061				41.197	1.00592			1.802	0.0439999			28.611	0.698603
			35.03	1.20148			2.976	0.102073			30.105	1.03256				36.846	1.19787			6.747	0.219346			27.832	0.904823				34.056	0.831555			3.69	0.0900997			27.78	0.678312
			26.312	0.902465			11.863	0.406884			34.072	1.16862				26.921	0.875206			17.472	0.568018			26.549	0.863113				47.549	1.16102			8.01	0.195582			27.41	0.669277
			25.997	0.891661			3.839	0.131672			36.115	1.23869				32.288	1.04969			4.466	0.14519			30.461	0.990292				32.556	0.794929			6.741	0.164597			37.817	0.923388
			28.054	0.962213			12.802	0.439091			27.48	0.942526				31.27	1.01659			13.248	0.430695			35.941	1.16845				43.003	1.05002			3.474	0.0848256			33.285	0.812729
			34.394	1.17967			3.398	0.116547			34.368	1.17877				32.612	1.06022			26.291	0.854725			32.912	1.06997				38.915	0.950198			6.833	0.166843			29.825	0.728245
			30.495	1.04594			13.523	0.46382			28.164	0.965986				26.906	0.874719			16.828	0.547081			31.468	1.02303				52.021	1.27021			3.401	0.0830431			25.834	0.630796
			25.931	0.889397			4.063	0.139355			30.635	1.05074				32.678	1.06237			3.156	0.102602			26.39	0.857943				46.006	1.12334			12.056	0.294375			43.022	1.05048
			28.646	0.982518			5.474	0.187751			37.728	1.29402				30.221	0.98249			3.064	0.0996112			42.042	1.36679				44.702	1.0915			11.278	0.275378			26.45	0.645837
			24.764	0.849371			4.455	0.1528			29.606	1.01544				39.631	1.28841			6.571	0.213624			35.535	1.15525				43.02	1.05043			7.233	0.17661			35.153	0.85834
			39.024	1.33847			4.483	0.153761			29.837	1.02337				31.145	1.01253			20.302	0.660021			34.846	1.13285				48.906	1.19415			14.477	0.353489			29.875	0.729466
			27.723	0.95086			11.362	0.389701			40.928	1.40377				28.478	0.925825			5.123	0.16655			32.21	1.04715				37.132	0.906662			7.338	0.179174			29.733	0.725999
			33.151	1.13703			8.003	0.274492			31.685	1.08675				31.558	1.02596			20.826	0.677057			32.605	1.05999				33.407	0.815708			22.908	0.559351			28.046	0.684807
			36.29	1.2447			3.52	0.120731			39.446	1.35294				30.433	0.989382			6.51	0.211641			28.377	0.922541				38.524	0.940651			12.071	0.294741			27.699	0.676334
			35.547	1.21921			8.111	0.278196			44.933	1.54114				32.885	1.0691			4.376	0.142265			27.627	0.898159				54.01	1.31878			3.013	0.0735692			28.622	0.698871
			38.295	1.31347			6.054	0.207644			13.565	0.465261				33.489	1.08873			2.438	0.0792598			28.169	0.915779				44.57	1.08828			8.434	0.205935			39.28	0.95911
			33.606	1.15264			4.554	0.156196			37.415	1.28328				22.045	0.716687			5.422	0.17627			26.612	0.865161				38.386	0.937281			5.268	0.12863			27.808	0.678995
			37.32	1.28002			4.08	0.139938			41.175	1.41225				31.997	1.04023			4.258	0.138428			35.863	1.16591				35.125	0.857657			10.358	0.252914			30.041	0.733519
			34.717	1.19074			4.65	0.159489			36.025	1.23561				30.947	1.00609			14.535	0.472535			36.869	1.19862				40.685	0.993417			14.26	0.34819			39.011	0.952542
			26.244	0.900133			7.46	0.255868			34.806	1.1938				27.116	0.881546			4.763	0.154846			37.103	1.20622				51.892	1.26706			3.162	0.0772074			42.7	1.04262
			39.588	1.35781			12.941	0.443858			42.466	1.45652				30.796	1.00118			10.855	0.352898			26.511	0.861877				37.056	0.904806			16.577	0.404765			35.468	0.866032
			33.476	1.14818			2.494	0.0855407			19.201	0.658568				28.205	0.916949			22.563	0.733527			30.227	0.982685				42.857	1.04645			5.691	0.138959			45.185	1.10329
			35.287	1.2103			2.524	0.0865697			40.37	1.38463				35.645	1.15883			3.114	0.101237			33.903	1.10219				35.892	0.876385			15.712	0.383644			29.568	0.72197
			26.074	0.894302			10.149	0.348097			31.665	1.08607				32.866	1.06848			14.221	0.462327			32.056	1.04215				38.505	0.940187			12.769	0.311784			40.281	0.983552
			34.889	1.19664			2.831	0.0970994			34.644	1.18824				32.339	1.05135			3.766	0.122433			35.421	1.15154				50.254	1.22707			8.71	0.212674			43.267	1.05646
			23.694	0.812671			2.425	0.0831741			32.421	1.112				26.55	0.863145			10.889	0.354003			32.53	1.05756				37.431	0.913963			16.958	0.414068			45.382	1.1081
			39.944	1.37002			7	0.24009			37.893	1.29968				30.505	0.991723			13.245	0.430597			27.003	0.877872				40.015	0.977057			5.52	0.134783			39.167	0.956351
			27.557	0.945167			2.048	0.0702436			31.108	1.06696				33.082	1.0755			10.532	0.342397			33.541	1.09042				46.747	1.14143			11.438	0.279285			47.066	1.14922
			35.255	1.2092			8.448	0.289755			35.477	1.21681				30.547	0.993088			27.299	0.887495			30.604	0.994941				24.472	0.597539			13.943	0.34045			40.514	0.989241
			31.641	1.08524			6.094	0.209016			33.647	1.15405				28.717	0.933595			17.061	0.554656			24.318	0.790582				44.552	1.08784			14.604	0.35659			39.278	0.959062
			33.266	1.14098			2.993	0.102656			38.897	1.33411				28.762	0.935058			5.766	0.187454			40.97	1.33194				43.589	1.06432			3.58	0.0874138			32.909	0.803548
			32.971	1.13086			5.103	0.175026			37.099	1.27244				33.658	1.09423			16.96	0.551373			27.638	0.898516				40.586	0.990999			12.777	0.311979			31.278	0.763723
			33.437	1.14684			7.491	0.256931			44.756	1.53507				40.994	1.33272			16.981	0.552055			41.32	1.34332				39.213	0.957474			15.086	0.368359			32.864	0.802449
			32.394	1.11107			2.988	0.102484			33.071	1.13429				31.627	1.0282			4.417	0.143597			28.491	0.926247				36.001	0.879046			4.382	0.106996			45.598	1.11338
			26.388	0.905072			2.174	0.0745652			31.029	1.06425				38.434	1.2495			17.94	0.583232			52.74	1.71459				41.389	1.01061			9.579	0.233893			49.741	1.21454
			29.345	1.00649			4.522	0.155098			31.346	1.07512				31.88	1.03642			10.728	0.348769			40.652	1.3216				46.178	1.12754			20.56	0.502019			37.121	0.906394
			30.715	1.05348			4.301	0.147518			28.595	0.980769				32.364	1.05216			6.15	0.199938			35.83	1.16484				34.383	0.839539			1.454	0.0355027			48.249	1.17811
			29.416	1.00893			3.298	0.113117			33.645	1.15398				33.998	1.10528			18.442	0.599553			34.134	1.1097				51.145	1.24882			6.603	0.161227			43.704	1.06713
			56.405	1.93461			10.915	0.374369			33.039	1.13319				40.81	1.32674			6.863	0.223117			40.902	1.32973				42.409	1.03551			23.629	0.576956			49.241	1.20233
			38.611	1.3243			3.894	0.133559			41.608	1.4271				24.73	0.803977			6.538	0.212552			27.993	0.910057				38.492	0.93987			8.858	0.216288			33.451	0.816782
			26.153	0.897012			10.153	0.348234			32.283	1.10726				33.825	1.09966			6.433	0.209138			38.542	1.25301				46.558	1.13682			5.99	0.146259			20.808	0.508075
			32.958	1.13041			2.392	0.0820423			35.513	1.21805				28.376	0.922509			10.185	0.331116			35.591	1.15707				40.411	0.986726			16.011	0.390945			39.085	0.954349
			29.639	1.01658			1.814	0.0622177			26.576	0.91152				32.666	1.06198			11.28	0.366715			23.549	0.765582				30.383	0.74187			11.575	0.28263			46.316	1.13091
			26.011	0.892141			4.687	0.160758			31.963	1.09629				31.042	1.00918			29.447	0.957327			32.345	1.05154				34.946	0.853286			6.156	0.150313			34.639	0.84579
			26.12	0.89588			4.49	0.154001			30.772	1.05544				28.774	0.935448			6.261	0.203546			42.674	1.38734				44.117	1.07722			9.161	0.223687			40.13	0.979865
			33.497	1.1489			2.036	0.069832			32.66	1.12019				31.411	1.02118			26.014	0.84572			32.867	1.06851				37.12	0.906369			10.245	0.250155			41.019	1.00157
			33.212	1.13913			7.444	0.255319			33.221	1.13943				29.893	0.971827			20.546	0.667954			44.54	1.448				49.478	1.20812			26.014	0.635191			46.951	1.14642
			35.377	1.21338			3.159	0.108349			38.796	1.33065				35.58	1.15671			13.092	0.425623			31.062	1.00983				39.334	0.960429			3.833	0.0935914			33.848	0.826476
			30.909	1.06014			3.293	0.112945			33.132	1.13638				37.399	1.21585			9.908	0.322111			37.932	1.23318				38.802	0.947439			21.143	0.516254			39.254	0.958476
			32.847	1.12661			2.005	0.0687687			42.423	1.45505				24.289	0.78964			23.833	0.774815			27.983	0.909732				36.314	0.886689			5.783	0.141205			30.034	0.733348
			38.934	1.33538			2.512	0.0861581			35.021	1.20117				37.374	1.21504			11.775	0.382807			36.194	1.17667				31.099	0.759353			7.695	0.187891			39.081	0.954251
			29.645	1.01678			7.191	0.246641			28.438	0.975384				24.675	0.802188			19.98	0.649553			33.236	1.08051				39.886	0.973907			18.964	0.463049			38.626	0.943141
			28.626	0.981832			3.48	0.119359			35.225	1.20817				24.42	0.793898			5.379	0.174872			36.623	1.19062				49.429	1.20692			11.259	0.274914			27.67	0.675626
			30.405	1.04285			5.152	0.176706			24.85	0.85232				34.71	1.12843			6.528	0.212226			29.35	0.954174				45.192	1.10347			3.369	0.0822618			38.695	0.944826
			55.167	1.89215			2.831	0.0970994			37.988	1.30294				32.496	1.05645			11.416	0.371136			28.719	0.93366				43.552	1.06342			3.331	0.0813339			40.607	0.991512
			30.83	1.05743			3.375	0.115758			34.725	1.19102				16.731	0.543928			10.531	0.342365			35.114	1.14156				32.301	0.788702			7.037	0.171824			33.693	0.822691
			39.563	1.35696			3.045	0.104439			34.063	1.16831				55.606	1.80776			4.004	0.130171			41.004	1.33305				35.117	0.857461			2.282	0.0557202			33.664	0.821983
			23.369	0.801524			2.365	0.0811162			35.082	1.20326				28.086	0.913081			15.059	0.489571			39.785	1.29342				40.097	0.979059			4.375	0.106826			28.61	0.698578
			29.226	1.00241			12.505	0.428904			30.135	1.03359				41.399	1.34589			4.905	0.159462			33.875	1.10128				50.538	1.234			3.001	0.0732762			40.938	0.999594
			33.703	1.15597			1.877	0.0643785			37.515	1.28671				31.54	1.02537			19.848	0.645262			42.177	1.37118				30.189	0.737133			6.321	0.154342			46.905	1.14529
			39.637	1.35949			3.193	0.109515			34.769	1.19253				7.717	0.250881			27.511	0.894387			33.774	1.098				39.139	0.955668			4.793	0.117032			30.442	0.743311
			33.711	1.15624			5.326	0.182674			34.177	1.17222				37.7	1.22563			20.925	0.680275			44.216	1.43747				34.258	0.836487			3.707	0.0905148			43.539	1.0631
			28.724	0.985193			5.427	0.186139			40.264	1.381				32.606	1.06003			6.014	0.195516			27.424	0.891559				50.232	1.22653			6.165	0.150532			38.455	0.938966
			32.621	1.11886			8.426	0.289			32.994	1.13165				16.662	0.541684			11.237	0.365317			29.264	0.951378				33.117	0.808627			2.443	0.0596514			35.562	0.868327
			33.089	1.13491			2.01	0.0689402			39.85	1.3668				23.972	0.779334			27.241	0.88561			39.796	1.29377				32.381	0.790656			4.561	0.111367			42.809	1.04528
			23.512	0.806429			2.834	0.0972023			32.648	1.11978				36.343	1.18152			25.494	0.828814			36.654	1.19163				43.293	1.0571			2.306	0.0563062			43.711	1.0673
			30.988	1.06285			4.324	0.148307			36.372	1.24751				51.344	1.6692			22.648	0.73629			31.887	1.03665				19.441	0.474696			7.914	0.193238			36.185	0.883539
			25.363	0.869916			3.374	0.115724			36.101	1.23821				31.361	1.01955			20.077	0.652707			23.241	0.755569				34.494	0.842249			5.843	0.14267			35.331	0.862687
			25.237	0.865594			1.836	0.0629723			35.183	1.20673				27.971	0.909342			6.229	0.202506			35.187	1.14394				46.132	1.12642			8.113	0.198097			43.065	1.05153
			27.84	0.954873			1.937	0.0664364			32.064	1.09975				32.889	1.06923			20.42	0.663858			41.313	1.34309				51.524	1.25808			2.107	0.0514472			34.194	0.834924
			28.238	0.968524			1.864	0.0639326			33.377	1.14478				23.043	0.749132			18.565	0.603551			35.208	1.14462				17.21	0.420221			4.998	0.122038			42.832	1.04584
			25.045	0.859009			2.627	0.0901025			29.265	1.00375				28.066	0.91243			25.168	0.818216			38.463	1.25044				40.489	0.988631			19.878	0.485367			41.848	1.02181
			23.006	0.789074			1.554	0.0533			26.58	0.911657				27.939	0.908302			6.647	0.216095			50.16	1.63071				39.905	0.974371			11.374	0.277722			36.772	0.897872
			25.706	0.88168			5.365	0.184012			40.518	1.38971				33.788	1.09845			18.941	0.615775			30.104	0.978686				39.676	0.96878			7.824	0.191041			45.38	1.10806
			37.047	1.27066			4.13	0.141653			35.141	1.20529				22.427	0.729106			9.692	0.315089			28.395	0.923126				46.603	1.13792			6.37	0.155538			29.969	0.731761
			28.637	0.982209			1.674	0.0574159			39.486	1.35431				48.795	1.58633			50.11	1.62908			42.03	1.3664				48.74	1.1901			3.894	0.0950808			27.625	0.674527
			38.009	1.30366			1.064	0.0364937			31.966	1.09639				50.087	1.62834			15.601	0.507191			44.605	1.45012				50.433	1.23144			10.188	0.248763			40.051	0.977936
			27.617	0.947225			1.475	0.0505905			26.926	0.923524				23.777	0.772994			18.312	0.595326			50.761	1.65025				36.739	0.897066			4.102	0.10016			44.839	1.09485
			28.166	0.966055			1.839	0.0630751			28.817	0.988383				34.072	1.10769			39.914	1.29761			26.981	0.877157				42.526	1.03837			4.422	0.107973			39.876	0.973663
			24.767	0.849474			7.504	0.257377			31.251	1.07187				37.914	1.23259			24.519	0.797117			36.303	1.18022				25.422	0.620736			4.615	0.112686			43.356	1.05864
			30.211	1.0362			2.543	0.0872214			33.688	1.15545				47.628	1.54839			3.521	0.114468			35.626	1.15821				43.814	1.06982			10.51	0.256626			41.278	1.0079
			34.186	1.17253			3.002	0.102964			38.854	1.33264				37.161	1.20811			15.516	0.504428			46.761	1.52021				28.245	0.689666			6.405	0.156393			46.248	1.12925
			28.171	0.966226			7.988	0.273977			27.534	0.944378				25.912	0.842404			38.147	1.24017			42.353	1.3769				32.459	0.79256			10.765	0.262852			40.168	0.980793
			27.038	0.927366			12.028	0.412544			37.516	1.28675				32.668	1.06204			7.17	0.233098			37.946	1.23363				33.601	0.820445			10.448	0.255112			39.618	0.967363
			32.607	1.11837			3.451	0.118365			38.014	1.30383				31.98	1.03968			26.061	0.847248			39.298	1.27758				40.076	0.978547			3.069	0.0749366			50.411	1.2309
			31.009	1.06357			1.948	0.0668137			33.507	1.14924				33.683	1.09504			3.25	0.105658			50.366	1.63741				57.116	1.39462			3.014	0.0735936			34.171	0.834363
			28.797	0.987697			0.997	0.0341957			41.292	1.41626				34.756	1.12992			11.56	0.375818			46.675	1.51741				11.458	0.279773			9.657	0.235798			32.63	0.796736
			27.879	0.956211			3.216	0.110304			27.861	0.955594				44.172	1.43604			22.088	0.718085			37.448	1.21744				41.315	1.0088			8.361	0.204153			41.771	1.01993
			31.566	1.08267			3.787	0.129889			47.383	1.62517				36.549	1.18821			24.086	0.78304			41.093	1.33594				30.859	0.753493			4.014	0.0980109			52.968	1.29333
			27.424	0.940605			2.554	0.0875987			27.712	0.950483				32.842	1.0677			10.974	0.356767			43.704	1.42082				45.155	1.10256			7.7	0.188013			40.724	0.994369
			26.137	0.896463			2.634	0.0903425			33.496	1.14887				41.274	1.34182			19.86	0.645652			41.751	1.35733				15.415	0.376392			13.814	0.3373			41.747	1.01935
			34.216	1.17356			3.94	0.135137			28.578	0.980186				37.994	1.23519			3.521	0.114468			46.644	1.5164				38.173	0.93208			7.179	0.175292			33.204	0.810751
			34.737	1.19143			1.744	0.0598168			26.108	0.895468				39.799	1.29387			11.961	0.388854			47.706	1.55093				40.42	0.986946			5.014	0.122428			53.272	1.30076
			30.392	1.0424			4.181	0.143402			39.383	1.35078				41.857	1.36078			29.251	0.950955			34.626	1.1257				49.905	1.21854			3.694	0.0901974			47.55	1.16104
			31.801	1.09073			1.927	0.0660934			34.919	1.19767				35.294	1.14741			23.969	0.779236			36.637	1.19108				33.557	0.81937			3.052	0.0745215			40.323	0.984578
			30.871	1.05883			4.337	0.148753			32.266	1.10668				29.365	0.954661			22.966	0.746629			41.621	1.35311				39.989	0.976422			8.246	0.201345			43.768	1.0687
			31.891	1.09382			2.36	0.0809447			33.311	1.14252				31.679	1.02989			24.952	0.811194			34.894	1.13441				40.678	0.993246			5.464	0.133416			42.781	1.0446
			37.211	1.27629			2.288	0.0784752			32.275	1.10699				48.265	1.5691			32.354	1.05183			38.856	1.26322				48.57	1.18595			5.358	0.130828			28.602	0.698383
			23.574	0.808555			4.518	0.154961			45.178	1.54954				49.241	1.60083			21.731	0.706479			40.03	1.30138				38	0.927856			7.975	0.194728			44.42	1.08462
			34.837	1.19486			5.932	0.203459			34.302	1.17651				31.556	1.02589			32.64	1.06113			50.257	1.63386				44.551	1.08781			11.759	0.287123			36.605	0.893794
			36.529	1.25289			1.258	0.0431477			27.148	0.931139				30.835	1.00245			20.96	0.681413			41.791	1.35863				43.347	1.05842			11.449	0.279553			38.222	0.933277
			23.181	0.795076			4.249	0.145735			39.147	1.34269				45.869	1.49121			40.004	1.30054			33.241	1.08067				39.08	0.954227			8.51	0.207791			41.183	1.00558
			28.226	0.968113			2.311	0.0792641			28.945	0.992773				38.719	1.25876			7.305	0.237487			38.978	1.26718				41.876	1.0225			9.254	0.225957			47.583	1.16185
			34.633	1.18786			3.677	0.126116			49.888	1.71109				37.412	1.21627			34.106	1.10879			33.225	1.08015				29.993	0.732347			7.915	0.193263			34.4	0.839954
			30.367	1.04155			1.59	0.0545348			31.096	1.06655				28.389	0.922931			10.665	0.346721			28.451	0.924947				39.928	0.974933			10.609	0.259043			51.284	1.25222
			43.453	1.49038			5.585	0.191558			32.157	1.10294				43.384	1.41042			16.239	0.527933			27.645	0.898744				28.984	0.70771			4.518	0.110317			44.66	1.09048
			25.054	0.859317			9.732	0.333794			33.607	1.15267				49.094	1.59605			20.03	0.651179			39.102	1.27121				44.716	1.09184			8.642	0.211014			44.998	1.09873
			43.633	1.49655			3.527	0.120971			34.004	1.16629				45.342	1.47408			14.789	0.480793			34.4	1.11835				29.415	0.718234			4.741	0.115762			44.035	1.07521
			32.059	1.09958			3.17	0.108727			35.836	1.22913				26.433	0.859341			16.412	0.533557			36.451	1.18503				35.642	0.87028			8.421	0.205618			41.698	1.01815
			36.441	1.24988			6.133	0.210353			30.733	1.0541				37.333	1.2137			31.02	1.00847			35.731	1.16162				48.936	1.19488			7.679	0.1875			34.248	0.836243
			38.087	1.30633			4.4	0.150914			34.562	1.18543				37.09	1.2058			23.447	0.762266			30.601	0.994844				28.992	0.707906			8.164	0.199343			40.432	0.987239
			39.83	1.36611			2.666	0.0914401			27.018	0.92668				46.839	1.52274			27.039	0.879043			30.959	1.00648				36.475	0.89062			7.212	0.176097			41.293	1.00826
			34.456	1.18179			5.494	0.188437			31.72	1.08795				28.347	0.921566			19.782	0.643116			46.477	1.51098				42.751	1.04386			10.184	0.248665			39.001	0.952298
			44.945	1.54155			3.301	0.11322			34.942	1.19846				34.414	1.11881			26.082	0.84793			32.309	1.05037				50.231	1.2265			10.791	0.263487			38.364	0.936744
			37.557	1.28815			1.402	0.0480867			31.83	1.09172				28.205	0.916949			34.657	1.12671			34.884	1.13408				54.428	1.32898			9.779	0.238776			39.025	0.952884
			32.51	1.11505			1.862	0.063864			38.15	1.30849				27.195	0.884114			1.992	0.0647603			33.051	1.07449				39.552	0.965752			2.185	0.0533517			36.068	0.880682
			36.593	1.25509			2.854	0.0978882			30.088	1.03198				57.222	1.8603			17.503	0.569026			42.054	1.36718				41.373	1.01022			9.92	0.242219			37.345	0.911863
			37.686	1.29258			9.667	0.331565			38.144	1.30829				27.261	0.88626			12.779	0.415447			26.658	0.866656				50.404	1.23073			8.977	0.219194			44.036	1.07524
			42.033	1.44167			2.954	0.101318			4.989	0.171116				28.613	0.930214			30.765	1.00018			44.596	1.44982				32.759	0.799885			16.028	0.39136			37.668	0.91975
			39.568	1.35713			3.65	0.12519			25.574	0.877153				28.121	0.914219			19.68	0.6398			32.766	1.06523				53.52	1.30681			3.655	0.0892451			35.378	0.863834
			35.124	1.2047			11.921	0.408874			32.524	1.11553				33.056	1.07466			25.651	0.833918			40.244	1.30834				29.258	0.714401			13.394	0.327045			44.104	1.0769
			38.251	1.31196			9.747	0.334309			26.182	0.898006				37.801	1.22892			26.312	0.855408			36.074	1.17277				32.9	0.803328			4.106	0.100257			37.973	0.927197
			40.653	1.39434			3.606	0.123681			45.218	1.55091				41.677	1.35493			27.548	0.89559			41.056	1.33474				49.602	1.21115			6.177	0.150825			39.961	0.975739
			35.482	1.21698			6.273	0.215155			34.784	1.19304				32.295	1.04992			7.435	0.241713			37.644	1.22381				49.463	1.20775			5.192	0.126774			36.788	0.898263
			32.958	1.13041			8.1	0.277819			39.704	1.36179				51.217	1.66507			17.238	0.56041			32.498	1.05652				43.681	1.06657			6.87	0.167747			47.633	1.16307
			39.152	1.34286			2.963	0.101627			29.03	0.995689				37.161	1.20811			18.86	0.613142			34.98	1.13721				42.045	1.02662			6.387	0.155953			42.555	1.03908
			19.298	0.661895			9.424	0.32323			29.369	1.00732				30.223	0.982555			29.623	0.963049			41.984	1.36491				39.938	0.975177			2.295	0.0560376			44.655	1.09035
			39.978	1.37119			9.967	0.341854			32.053	1.09937				25.947	0.843541			22.699	0.737948			30.693	0.997835				39.738	0.970294			5.249	0.128166			31.855	0.777812
			33.93	1.16375			10.133	0.347548			32.241	1.10582				49.428	1.60691			17.898	0.581867			44.199	1.43692				56.182	1.37181			5.848	0.142792			31.393	0.766531
			33.676	1.15504			12.351	0.423622			48.602	1.66698				29.38	0.955149			6.773	0.220191			34.342	1.11646				48.55	1.18546			9.818	0.239729			26.512	0.647351
			27.735	0.951272			3.766	0.129169			30.703	1.05307				29.698	0.965487			16.552	0.538108			37.802	1.22895				47.547	1.16097			7.203	0.175878			34.711	0.847548
			51.609	1.77012			4.773	0.163707			33.971	1.16516				54.281	1.76468			9.379	0.304913			39.886	1.2967				43.788	1.06918			5.093	0.124357			38.304	0.935279
			36.605	1.2555			4.334	0.14865			33.922	1.16348				33.064	1.07492			25.882	0.841428			31.453	1.02254				67.492	1.64797			5.474	0.13366			31.133	0.760183
			41.126	1.41056			4.332	0.148582			43.604	1.49556				27.66	0.899231			9.706	0.315544			37.231	1.21039				40.8	0.996225			2.808	0.0685637			39.565	0.966069
			36.095	1.23801			9.483	0.325254			29.474	1.01092				38.85	1.26302			10.689	0.347501			31.403	1.02092				52.385	1.2791			6.149	0.150142			42.217	1.03082
			40.204	1.37894			7.332	0.251477			43.721	1.49957				30.846	1.00281			22.53	0.732454			40.96	1.33162				52.164	1.2737			12.462	0.304288			43.935	1.07277
			28.738	0.985673			7.975	0.273531			40.35	1.38395				38.579	1.25421			12.444	0.404557			35.136	1.14228				40.918	0.999106			8.486	0.207205			39.764	0.970928
			33.068	1.13419			4.877	0.167274			39.224	1.34533				26.861	0.873256			6.719	0.218436			47.826	1.55483				60.001	1.46506			5.285	0.129045			50.763	1.23949
			37.833	1.29762			6.589	0.225994			33.177	1.13793				28.382	0.922704			22.536	0.732649			47.969	1.55948				40.409	0.986677			6.962	0.169993			42.477	1.03717
			34.736	1.1914			3.317	0.113768			35.711	1.22484				55.746	1.81231			15.709	0.510702			30.948	1.00612				53.03	1.29485			7.044	0.171995			39.452	0.96331
			45.876	1.57348			7.135	0.244721			38.012	1.30376				20.638	0.670945			38.884	1.26413			28.004	0.910415				46.549	1.1366			8.001	0.195363			27.042	0.660292
			32.617	1.11872			11.302	0.387643			33.053	1.13367				33.857	1.1007			43.922	1.42791			36.523	1.18737				35.188	0.859195			3.784	0.092395			29.034	0.708931
			27.675	0.949214			4.866	0.166897			33.205	1.13889				23.69	0.770166			18.535	0.602576			29.182	0.948712				56.252	1.37352			4.842	0.118228			28.987	0.707783
			25.257	0.86628			11.729	0.402288			42.113	1.44442				50.964	1.65685			2.622	0.0852417			36.681	1.19251				37.742	0.921557			4.228	0.103236			40.542	0.989925
			31.56	1.08246			3.495	0.119874			28.376	0.973257				51.837	1.68523			5.595	0.181894			35.247	1.14589				58.031	1.41696			11.152	0.272301			30.528	0.74541
			18.239	0.625572			16.683	0.572204			35.215	1.20783				27.27	0.886552			29.004	0.942925			35.896	1.16699				50.622	1.23605			3.104	0.0757912			35.505	0.866935
			43.781	1.50163			5.26	0.180411			28.379	0.97336				35.47	1.15314			30.184	0.981287			42.811	1.39179				36.276	0.885761			5.447	0.133001			36.355	0.88769
			30.958	1.06182			6.505	0.223112			29.994	1.02875				25.142	0.817371			26.75	0.869647			34.8	1.13135				54.375	1.32769			11.31	0.276159			47.635	1.16312
			31.955	1.09601			13.113	0.449758			31.374	1.07608				43.342	1.40906			39.858	1.29579			31.64	1.02862				48.062	1.17354			10.669	0.260508			19.184	0.468421
			39.082	1.34046			6.363	0.218242			30.823	1.05719				30.839	1.00258			42.572	1.38402			35.422	1.15158				43.222	1.05536			2.416	0.0589921			33.756	0.824229
			45.751	1.5692			4.119	0.141276			44.649	1.5314				24.155	0.785283			4.109	0.133584			28.582	0.929206				53.281	1.30098			9.031	0.220512			28.824	0.703803
			31.074	1.0658			11.308	0.387849			34.119	1.17023				26.488	0.861129			17.295	0.562263			30.491	0.991268				61.372	1.49854			3.156	0.0770609			35.642	0.87028
			31.419	1.07763			3.647	0.125087			34.873	1.1961				30.294	0.984863			5.94	0.19311			31.73	1.03155				41.887	1.02277			4.17	0.10182			16.545	0.403984
			30.898	1.05976			9.675	0.331839			39.76	1.36371				40.209	1.3072			22.399	0.728195			29.156	0.947867				47.159	1.15149			8.5	0.207547			33.127	0.808871
			44.79	1.53623			6.044	0.207301			33.977	1.16536				41.826	1.35977			10.123	0.3291			38.575	1.25408				32.72	0.798933			5.69	0.138934			26.512	0.647351
			39.188	1.34409			5.261	0.180445			40.614	1.393				27.684	0.900012			9.186	0.298638			35.571	1.15642				25.05	0.611653			10.502	0.25643			32.785	0.80052
			31.395	1.0768			14.405	0.494071			31.208	1.07039				26.721	0.868704			4.181	0.135925			39.699	1.29062				22.537	0.550292			6.707	0.163767			30.072	0.734276
			30.811	1.05677			15.362	0.526895			31.663	1.086				30.31	0.985383			14.269	0.463888			36.803	1.19647				36.595	0.89355			9.157	0.223589			25.205	0.615437
			37.287	1.27889			10.675	0.366138			32.729	1.12256				39.354	1.27941			9.806	0.318795			30.676	0.997282				48.999	1.19642			3.403	0.083092			49.503	1.20873
			46.134	1.58233			16.644	0.570866			40.476	1.38827				26.928	0.875434			22.748	0.739541			25.343	0.823905				16.148	0.39429			4.065	0.0992562			19.12	0.466858
			41.243	1.41458			25.136	0.86213			30.144	1.0339				43.756	1.42252			35.457	1.15271			31.403	1.02092				36.303	0.88642			3.525	0.0860709			46.857	1.14412
			38.693	1.32712			10.48	0.359449			29.923	1.02632				31.466	1.02297			5.742	0.186673			32.72	1.06373				39.871	0.973541			13.06	0.31889			49.047	1.19759
			45.363	1.55589			6.546	0.224519			24.817	0.851189				25.952	0.843704			2.755	0.0895655			33.388	1.08545				31.739	0.77498			4.199	0.102528			34.725	0.84789
			32.248	1.10606			10.662	0.365692			35.582	1.22041				23.247	0.755764			9.175	0.298281			32.54	1.05788				43.851	1.07072			2.965	0.0723972			35.572	0.868571
			29.826	1.02299			8.557	0.293493			11.827	0.40565				34.877	1.13386			15.884	0.516392			38.153	1.24036				41.881	1.02262			8.131	0.198537			35.051	0.85585
			17.754	0.608938			9.427	0.323333			1.872	0.064207				25.301	0.82254			15.449	0.50225			34.807	1.13158				46.192	1.12788			4.593	0.112149			22.064	0.538743
			41.361	1.41862			6.236	0.213886			28.343	0.972126				49.361	1.60473			4.795	0.155886			27.082	0.88044				41.352	1.0097			4.404	0.107534			22.193	0.541892
			40.251	1.38055			15.869	0.544285			25.52	0.875301				27.257	0.88613			25.844	0.840193			33.158	1.07797				45.495	1.11086			3.461	0.0845082			25.211	0.615584
			37.662	1.29175			6.671	0.228806			38.627	1.32485				46.76	1.52018			11.849	0.385213			29.083	0.945493				46.072	1.12495			3.973	0.0970098			23.081	0.563575
			35.513	1.21805			7.067	0.242388			34.148	1.17123				28.873	0.938666			3.836	0.124709			31.842	1.03519				31.027	0.757595			15.386	0.375684			39.314	0.959941
			44.668	1.53205			4.259	0.146078			42.889	1.47103				16.572	0.538759			30.635	0.995949			38.34	1.24644				37.747	0.921679			10.42	0.254428			28.391	0.693231
			31.622	1.08459			6.328	0.217042			38.189	1.30983				18.723	0.608688			17.506	0.569123			29.866	0.970949				23.672	0.578006			5.211	0.127238			28.21	0.688811
			45.396	1.55702			6.96	0.238718			40.17	1.37778				37.943	1.23353			17.555	0.570716			33.547	1.09062				30.368	0.741504			8.439	0.206057			29.691	0.724973
			36.517	1.25248			6.299	0.216047			39.728	1.36262				38.543	1.25304			30.536	0.992731			29.468	0.95801				34.043	0.831237			12.293	0.300162			24.078	0.587919
			34.736	1.1914			16.231	0.556701			32.147	1.1026				21.869	0.710965			2.05	0.0666459			41.389	1.34556				15.456	0.377393			12.923	0.315544			30.873	0.753834
			50.17	1.72076			30.824	1.05722			25.409	0.871493				1.181	0.0383945			22.96	0.746434			27.08	0.880375				38.979	0.951761			5.007	0.122257			34.177	0.834509
			39.457	1.35332			7.268	0.249282			36.03	1.23578				42.482	1.3811			6.718	0.218403			23.194	0.754041				47.636	1.16314			10.669	0.260508			19.772	0.482778
			41.94	1.43848			8.623	0.295757			35.475	1.21674				30.339	0.986326			6.165	0.200425			33.364	1.08467				41.534	1.01415			10.487	0.256064			33.491	0.817759
			44.808	1.53685			9.964	0.341751			40.133	1.37651				32.065	1.04244			7.805	0.253742			33.204	1.07947				35.724	0.872283			2.505	0.0611653			46.889	1.1449
			41.426	1.42085			20.675	0.709124			30.5	1.04611				8.15	0.264958			14.138	0.459629			32.509	1.05687				45.812	1.1186			13.714	0.334858			18.405	0.4494
			39.444	1.35287			9.24	0.316919			28.61	0.981283				32.134	1.04468			18.153	0.590157			30.008	0.975565				41.472	1.01263			11.088	0.270739			24.908	0.608185
			27.311	0.936729			10.621	0.364286			37.021	1.26977				24.13	0.78447			13.135	0.427021			39.547	1.28568				42.902	1.04755			5.074	0.123893			16.848	0.411382
			37.418	1.28339			13.007	0.446122			31.844	1.0922				29.082	0.945461			22.812	0.741622			34.841	1.13269				42.918	1.04794			2.904	0.0709078			37.451	0.914451
			35.602	1.2211			16.659	0.571381			34.319	1.17709				18.986	0.617238			13.806	0.448835			31.116	1.01159				45.951	1.122			9.944	0.242805			25.213	0.615633
			35.525	1.21846			4.124	0.141447			37.261	1.278				24.245	0.788209			3.635	0.118174			40.336	1.31133				41.267	1.00763			5.016	0.122477			18.193	0.444223
			41.974	1.43965			13.665	0.468691			35.315	1.21126				31.072	1.01016			20.408	0.663468			28.517	0.927093				31.381	0.766238			7.047	0.172069			29.592	0.722556
			46.315	1.58854			4.608	0.158048			32.197	1.10431				24.248	0.788307			12.459	0.405044			36.263	1.17892				47.273	1.15428			11.711	0.285951			27.201	0.664174
			32.311	1.10822			14.857	0.509574			37.415	1.28328				46.873	1.52385			3.59	0.116712			28.667	0.931969				34.165	0.834216			3.122	0.0762307			35.422	0.864909
			42.871	1.47042			9.751	0.334446			41.387	1.41952				33.51	1.08942			3.651	0.118695			22.163	0.720523				43.635	1.06545			9.159	0.223638			24.202	0.590947
			34.933	1.19815			8.205	0.28142			33.549	1.15068				40.575	1.3191			17.219	0.559793			38.893	1.26442				31.486	0.768802			11.679	0.285169			21.031	0.51352
			44.214	1.51648			12.044	0.413092			42.39	1.45392				26.697	0.867924			18.803	0.611289			23.922	0.777708				30.066	0.73413			11.086	0.27069			28.397	0.693377
			25.446	0.872762			5.844	0.200441			28.382	0.973463				29.617	0.962854			16.648	0.541229			32.25	1.04845				33.794	0.825157			5.718	0.139618			28.27	0.690276
			44.249	1.51768			15.443	0.529673			30.957	1.06178				49.275	1.60194			12.005	0.390285			30.797	1.00122				32.161	0.785284			3.701	0.0903683			22.421	0.54746
			48.246	1.65477			14.695	0.504018			26.909	0.922941				22.987	0.747311			27.901	0.907066			31.858	1.03571				35.209	0.859708			13.279	0.324237			29.863	0.729173
			32.137	1.10225			5.422	0.185967			35.626	1.22192				24.947	0.811031			32.196	1.0467			24.213	0.787169				36.817	0.898971			13.543	0.330683			38.294	0.935035
			36.146	1.23976			9.097	0.312014			17.376	0.595973				23.909	0.777286			7.435	0.241713			26.485	0.861032				37.824	0.923559			27.082	0.661269			29.577	0.72219
			46.966	1.61087			14.625	0.501617			22.28	0.764173				30.349	0.986651			3.925	0.127602			25.613	0.832683				36.889	0.900729			15.598	0.380861			30.95	0.755715
			34.92	1.19771			13.676	0.469068			38.008	1.30362				32.276	1.0493			8.695	0.282676			30.221	0.98249				33.946	0.828869			3.274	0.0799421			17.086	0.417193
			50.872	1.74484			9.508	0.326111			33.396	1.14544				39.679	1.28997			13.341	0.433718			36.09	1.17329				55.074	1.34476			13.645	0.333174			19.909	0.486123
			44.073	1.51164			7.671	0.263105			24.31	0.833799				17.509	0.569221			21.989	0.714866			28.363	0.922086				43.019	1.05041			11.139	0.271984			16.496	0.402787
			40.384	1.38512			9.56	0.327895			36.057	1.23671				32.633	1.0609			4.887	0.158877			23.834	0.774847				30.534	0.745557			9.173	0.22398			27.305	0.666714
			40.033	1.37308			20.382	0.699074			31.49	1.08006				32.596	1.0597			6.57	0.213592			27.45	0.892404				41.32	1.00892			13.697	0.334443			25.372	0.619515
			53.272	1.82716			10.243	0.351321			32.717	1.12215				22.541	0.732812			7.68	0.249678			26.707	0.868249				28.452	0.69472			11.916	0.290956			19.755	0.482363
			33.032	1.13295			9.552	0.32762			27.83	0.95453				30.482	0.990975			4.254	0.138298			24.881	0.808886				36.093	0.881293			11.199	0.273449			24.588	0.600372
			51.669	1.77217			17.088	0.586095			35.736	1.2257				38.182	1.2413			31.562	1.02609			24.239	0.788014				35.613	0.869572			8.125	0.19839			27.513	0.671792
			32.655	1.12002			4.463	0.153075			42.18	1.44672				25.468	0.827969			38.33	1.24611			33.817	1.0994				57.77	1.41059			15.007	0.36643			25.738	0.628452
			35.937	1.23259			25.109	0.861204			39.013	1.33809				5.077	0.165054			5.261	0.171036			31.132	1.01211				43.992	1.07416			15.125	0.369311			31.15	0.760598
			34.281	1.17579			8.243	0.282723			36.68	1.25807				24.843	0.80765			1.987	0.0645977			28.747	0.93457				41.954	1.0244			7.959	0.194337			22.312	0.544798
			36.427	1.2494			20.137	0.690671			33.733	1.157				50.146	1.63026			36.52	1.18727			25.429	0.826701				33.955	0.829088			3.111	0.0759621			27.053	0.66056
			38.161	1.30887			17.334	0.594532			29.035	0.99586				25.765	0.837625			4.587	0.149124			26.552	0.86321				32.753	0.799739			11.878	0.290028			23.689	0.578421
			25.89	0.887991			21.249	0.728811			37.508	1.28647				23.503	0.764087			6.797	0.220972			25.777	0.838015				38.073	0.929639			8.58	0.2095			24.014	0.586356
			32.254	1.10627			15.059	0.516503			30.765	1.0552				21.826	0.709567			6.253	0.203286			27.967	0.909212				28.665	0.699921			11.53	0.281531			21.08	0.514716
			37.634	1.29079			16.033	0.54991			34.452	1.18166				32.838	1.06757			4.382	0.14246			23.449	0.762331				51.132	1.2485			14.118	0.344723			24.617	0.60108
			34.262	1.17514			18.729	0.642379			29.064	0.996855				40.123	1.30441			16.885	0.548934			32.462	1.05535				68.871	1.68164			7.694	0.187866			21.165	0.516792
			29.36	1.00701			26.259	0.900647			36.654	1.25718				28.405	0.923451			1.953	0.0634924			36.04	1.17167				67.866	1.6571			5.26	0.128435			26.651	0.650745
			30.777	1.05561			22.11	0.758342			31.607	1.08408				32.918	1.07017			6.126	0.199157			30.126	0.979401				32.838	0.801814			3.127	0.0763528			24.401	0.595806
			36.092	1.23791			7.094	0.243314			34.277	1.17565				31.274	1.01672			7.784	0.253059			25.986	0.844809				31.74	0.775004			3.143	0.0767435			23.335	0.569777
			25.721	0.882195			13.854	0.475173			41.353	1.41835				34.868	1.13356			9.895	0.321688			25.275	0.821695				43.324	1.05785			10.639	0.259775			14.684	0.358543
			38.442	1.31851			24.995	0.857294			29.295	1.00478				33.936	1.10327			5.983	0.194508			26.504	0.86165				27.898	0.681193			4.652	0.113589			27.461	0.670523
			44.606	1.52992			19.107	0.655344			37.081	1.27183				25.001	0.812787			4.472	0.145385			30.486	0.991105				41.542	1.01434			12.735	0.310954			23.138	0.564967
			34.76	1.19222			13.694	0.469685			38.783	1.3302				44.378	1.44274			7.257	0.235926			31.586	1.02687				33.86	0.826769			5.161	0.126018			20.559	0.501995
			34.454	1.18172			42.942	1.47285			29.838	1.0234				30.594	0.994616			8.142	0.264698			38.085	1.23815				33.356	0.814462			3.525	0.0860709			26.087	0.636973
			44.636	1.53095			6.109	0.20953			24.389	0.836509				26.571	0.863828			8.039	0.261349			30.317	0.985611				23.655	0.577591			4.427	0.108095			21.758	0.531271
			38.119	1.30743			32.841	1.1264			37.902	1.29999				33.536	1.09026			13.622	0.442854			35.827	1.16474				34.499	0.842371			1.95	0.0476137			22.737	0.555175
			41.201	1.41314			15.53	0.532657			42.109	1.44428				26.261	0.85375			12.544	0.407808			27.747	0.90206				37.077	0.905319			15.531	0.379225			22.736	0.555151
			40.881	1.40216			15.934	0.546514			30.499	1.04607				27.958	0.908919			27.842	0.905148			27.909	0.907326				33.046	0.806893			11.251	0.274719			23.636	0.577127
			30.887	1.05938			17.881	0.613293			31.08	1.066				45.446	1.47746			13.017	0.423185			25.461	0.827741				46.571	1.13714			11.236	0.274352			22.61	0.552074
			38.377	1.31628			21.543	0.738895			23.812	0.816719				46.431	1.50948			1.957	0.0636224			25.343	0.823905				37.758	0.921947			9.99	0.243929			23.218	0.56692
			32.778	1.12424			13.938	0.478054			26.074	0.894302				31.183	1.01376			7.818	0.254165			22.611	0.735087				39.673	0.968706			9.412	0.229815			23.093	0.563868
			24.007	0.823407			12.608	0.432437			36.459	1.25049				29.687	0.965129			4.207	0.13677			27.395	0.890616				40.087	0.978815			11.331	0.276672			27.917	0.681657
			35.244	1.20882			12.991	0.445573			34.991	1.20014				25.604	0.83239			4.259	0.138461			42.92	1.39534				32.145	0.784893			3.182	0.0776958			50.098	1.22326
			29.144	0.999599			14.406	0.494106			29.187	1.00107				30.918	1.00515			4.562	0.148311			23.022	0.748449				36.768	0.897774			4.109	0.100331			33.257	0.812045
			31.126	1.06758			21.376	0.733167			32.134	1.10215				29.363	0.954596			7.782	0.252994			28.878	0.938829				40.19	0.98133			18.541	0.452721			39.999	0.976666
			32.274	1.10695			11.36	0.389632			31.459	1.079				36.27	1.17914			8.486	0.275881			30.597	0.994714				35.402	0.86442			17.338	0.423347			24.405	0.595903
			33.2	1.13871			26.018	0.892381			37.548	1.28784				29.016	0.943315			8.365	0.271948			26.048	0.846825				46.364	1.13208			4.169	0.101796			27.971	0.682975
			40.608	1.3928			17.349	0.595047			29.745	1.02021				49.797	1.61891			3.891	0.126497			25.143	0.817403				40.574	0.990706			3.917	0.0956425			32.921	0.803841
			37.386	1.28229			27.742	0.951512			35.315	1.21126				48.332	1.57128			6.857	0.222922			25.782	0.838177				48.233	1.17772			13.865	0.338545			34.074	0.831994
			38.371	1.31607			16.251	0.557387			37.721	1.29378				37.833	1.22996			11.096	0.360733			22.672	0.737071				46.58	1.13736			4.797	0.11713			36.482	0.890791
			32.247	1.10603			25.313	0.868201			28.221	0.967941				27.243	0.885675			2.843	0.0924264			23.793	0.773515				35.336	0.862809			6.186	0.151045			46.385	1.1326
			33.637	1.1537			6.457	0.221466			34.178	1.17226				42.969	1.39693			3.247	0.105561			33.666	1.09449				38.001	0.927881			4.592	0.112124			29.084	0.710152
			29.239	1.00286			15.043	0.515954			33.793	1.15905				21.908	0.712233			9.533	0.309919			36.874	1.19878				58.892	1.43798			8.491	0.207327			30.405	0.742407
			36.14	1.23955			13.963	0.478912			33.83	1.16032				27.266	0.886422			1.911	0.0621269			32.292	1.04982				34.525	0.843006			10.525	0.256992			43.222	1.05536
			41.535	1.42459			15.249	0.52302			32.3	1.10785				22.053	0.716947			28.524	0.92732			39.049	1.26949				26.071	0.636583			11.911	0.290834			20.97	0.51203
			36.036	1.23598			21.556	0.739341			36.225	1.24247				35.044	1.13929			6.442	0.209431			26.42	0.858919				39.332	0.96038			4.158	0.101527			40.663	0.992879
			47.842	1.64091			27.477	0.942423			34.705	1.19033				33.269	1.08158			3.449	0.112128			24.974	0.811909				29.431	0.718625			17.441	0.425862			26.719	0.652405
			33.197	1.13861			17.452	0.598579			33.441	1.14698				32.718	1.06367			14.402	0.468211			14.344	0.466326				39.487	0.964165			17.203	0.42005			20.003	0.488419
			36.282	1.24442			18.262	0.626361			31.522	1.08116				44.115	1.43419			7.021	0.228254			28.87	0.938569				39.775	0.971197			6.109	0.149165			45.611	1.1137
			29.296	1.00481			11.248	0.385791			43.511	1.49237				41.007	1.33314			5.669	0.1843			23.955	0.778781				38.726	0.945583			3.818	0.0932251			27.971	0.682975
			34.4	1.17987			22.836	0.783243			31.381	1.07632				27.978	0.90957			8.117	0.263885			29.855	0.970591				36.295	0.886225			10.246	0.250179			38.786	0.947048
			41.96	1.43917			19.717	0.676266			26.794	0.918997				43.085	1.4007			9.901	0.321883			20.65	0.671335				41.732	1.01898			4.749	0.115958			39.765	0.970953
			36.724	1.25958			14.316	0.491019			39.511	1.35517				24.936	0.810674			4.051	0.131699			23.24	0.755536				29.963	0.731615			10.473	0.255722			23.766	0.580301
			40.06	1.374			30.948	1.06147			32.45	1.11299				33.624	1.09312			8.019	0.260699			29.609	0.962594				24.764	0.604669			11.672	0.284998			43.528	1.06283
			44.534	1.52745			23.229	0.796722			39.545	1.35634				32.749	1.06468			4.903	0.159397			22.794	0.741037				34.824	0.850307			2.272	0.055476			28.407	0.693621
			41.504	1.42353			17.615	0.60417			28.698	0.984302				21.035	0.683851			12.16	0.395324			28.075	0.912723				40.073	0.978473			5.725	0.139789			36.006	0.879168
			32.573	1.11721			4.902	0.168132			42.043	1.44202				32.079	1.04289			10.647	0.346136			23.2	0.754236				47.936	1.17047			21.02	0.513251			27.252	0.665419
			36.908	1.26589			12.009	0.411892			35.942	1.23276				27.953	0.908757			31.135	1.0122			20.122	0.65417				53.227	1.29966			9.3	0.227081			44.922	1.09687
			30.719	1.05362			13.051	0.447631			30.156	1.03431				32.47	1.05561			8.653	0.281311			26.344	0.856448				30.051	0.733763			20.381	0.497648			40.972	1.00042
			31.197	1.07001			7.232	0.248048			38.059	1.30537				23.219	0.754854			7.534	0.244932			27.374	0.889933				56.642	1.38304			7.262	0.177318			33.664	0.821983
			31.863	1.09286			8.939	0.306595			28.116	0.96434				32.179	1.04614			7.046	0.229067			25.396	0.825628				52.952	1.29294			5.174	0.126335			36.906	0.901144
			36.049	1.23643			12.384	0.424754			27.893	0.956691				26.231	0.852774			2.888	0.0938894			26.417	0.858821				34.168	0.834289			19.058	0.465344			29.677	0.724631
			29.796	1.02196			14.893	0.510809			31.254	1.07197				25.259	0.821174			13.093	0.425656			24.043	0.781642				55.437	1.35362			6.569	0.160397			38.761	0.946438
			35.524	1.21842			26.759	0.917797			40.046	1.37352				29.988	0.974915			12.622	0.410343			25.169	0.818249				31.462	0.768216			4.366	0.106606			32.898	0.803279
			36.475	1.25104			10.815	0.370939			34.163	1.17174				29.865	0.970916			2.859	0.0929466			28.043	0.911683				44.312	1.08198			19.496	0.476039			46.624	1.13843
			30.898	1.05976			9.595	0.329095			36.243	1.24308				36.72	1.19377			5.583	0.181504			31.063	1.00986				37.478	0.91511			3.975	0.0970586			45.346	1.10723
			21.329	0.731555			25.475	0.873757			28.624	0.981763				25.537	0.830212			3.428	0.111445			25.312	0.822897				47.594	1.16212			4.481	0.109414			45.847	1.11946
			39.021	1.33837			32.96	1.13048			30.413	1.04312				34.258	1.11373			3.94	0.12809			28.301	0.92007				60.991	1.48923			8.818	0.215311			43.196	1.05473
			29.7	1.01867			6.489	0.222564			27.77	0.952472				34.115	1.10908			5.962	0.193826			27.41	0.891104				38.754	0.946267			2.08	0.0507879			27.767	0.677994
			34.159	1.17161			15.966	0.547612			27.189	0.932545				30.054	0.977061			20.681	0.672343			28.89	0.939219				48.485	1.18387			5.015	0.122453			41.948	1.02426
			28.297	0.970548			6.052	0.207575			36.068	1.23708				29.38	0.955149			2.232	0.0725627			27.54	0.89533				56.598	1.38197			11.82	0.288612			28.418	0.69389
			35.68	1.22377			13.364	0.458367			39.78	1.3644				34.628	1.12576			23.871	0.77605			25.294	0.822312				41.776	1.02006			9.907	0.241902			30.76	0.751075
			33.529	1.15			13.031	0.446945			45.33	1.55476				36.523	1.18737			11.092	0.360603			27.742	0.901897				37.797	0.9229			6.081	0.148481			49.283	1.20336
			19.354	0.663815			14.936	0.512284			35.767	1.22676				36.371	1.18243			3.515	0.114273			35.124	1.14189				41.224	1.00658			4.017	0.0980842			29.311	0.715695
			28.196	0.967084			9.801	0.336161			26.321	0.902774				34.169	1.11084			4.38	0.142395			23.957	0.778846				46.821	1.14324			9.307	0.227252			21.974	0.536545
			32.309	1.10815			10.331	0.354339			25.248	0.865971				31.434	1.02192			7.214	0.234528			24.062	0.78226				38.554	0.941383			4.378	0.106899			42.691	1.0424
			29.925	1.02639			7.569	0.259606			43.136	1.4795				24.151	0.785153			3.65	0.118662			25.299	0.822475				36.118	0.881903			4.481	0.109414			36.195	0.883783
			31.36	1.0756			8.453	0.289926			31.208	1.07039				26.291	0.854725			17.742	0.576795			28.107	0.913763				47.307	1.15511			6.215	0.151753			39.643	0.967974
			23.46	0.804645			17.079	0.585786			27.359	0.938376				36.819	1.19699			25.578	0.831545			32.537	1.05778				30.799	0.752028			7.177	0.175243			45.397	1.10847
			28.211	0.967598			12.391	0.424994			24.808	0.85088				38.087	1.23821			2.99	0.0972054			26.402	0.858334				40.505	0.989022			3.862	0.0942995			32.398	0.791071
			28.752	0.986154			13.933	0.477883			35.819	1.22854				40.237	1.30811			11.57	0.376143			27.493	0.893802				46.909	1.14539			2.168	0.0529366			44.071	1.07609
			23.265	0.797957			9.693	0.332456			46.568	1.59722				40.07	1.30268			6.416	0.208585			27.643	0.898679				30.594	0.747022			7.05	0.172142			41.136	1.00443
			33.378	1.14482			15.467	0.530497			30.729	1.05396				36.521	1.1873			6.75	0.219444			28.865	0.938406				37.625	0.9187			5.191	0.12675			28.029	0.684392
			22.285	0.764345			10.216	0.350395			34.312	1.17685				37.437	1.21708			4.348	0.141354			20.84	0.677512				25.487	0.622323			3.913	0.0955448			33.114	0.808554
			24.911	0.854413			15.171	0.520344			27.894	0.956725				31.91	1.0374			10.995	0.357449			27.409	0.891071				27.839	0.679752			9.143	0.223247			40.01	0.976935
			30.639	1.05088			14.61	0.501103			31.984	1.09701				23.059	0.749652			4.524	0.147076			24.454	0.795004				39.366	0.96121			4.549	0.111074			32.504	0.793659
			19.615	0.672767			8.213	0.281694			21.674	0.743388				23.932	0.778033			4.222	0.137258			27.317	0.88808				40.07	0.9784			5.269	0.128655			24.095	0.588334
			21.591	0.740541			18.631	0.639017			35.01	1.20079				30.372	0.987399			6.476	0.210536			29.01	0.94312				36.609	0.893892			8.999	0.219731			24.504	0.598321
			28.534	0.978677			14.535	0.49853			37.936	1.30115				33.941	1.10343			5.932	0.19285			26.292	0.854757				45.937	1.12166			3.133	0.0764993			46.391	1.13274
			36.529	1.25289			13.293	0.455931			40.903	1.40292				24.253	0.788469			18.881	0.613825			21.683	0.704918				30.071	0.734252			8.336	0.203542			36.459	0.890229
			30.872	1.05887			15.548	0.533275			33.998	1.16608				20.364	0.662037			4.209	0.136835			25.228	0.820167				33.806	0.82545			7.278	0.177709			33.973	0.829528
			34.801	1.19363			10.194	0.34964			31.861	1.09279				33.911	1.10245			4.242	0.137908			33.511	1.08945				27.423	0.669595			4.941	0.120646			46.823	1.14329
			34.968	1.19935			16.469	0.564864			27.295	0.936181				33.694	1.0954			21.956	0.713793			25.507	0.829237				11.402	0.278406			11.606	0.283387			36.917	0.901412
			28.274	0.969759			4.265	0.146284			50.64	1.73688				27.257	0.88613			21.635	0.703358			30.443	0.989707				32.665	0.79759			10.603	0.258896			42.583	1.03976
			5.267	0.180651			18.772	0.643854			31.995	1.09738				22.158	0.72036			3.823	0.124286			22.026	0.716069				52.035	1.27055			5.875	0.143451			41.938	1.02401
			25.225	0.865182			17.423	0.597585			28.667	0.983238				29.627	0.963179			16.787	0.545748			26.111	0.848873				24.854	0.606867			4.831	0.11796			48.456	1.18316
			37.418	1.28339			15.655	0.536945			30.933	1.06096				33.65	1.09397			7.112	0.231212			35.049	1.13945				28.304	0.691106			9.275	0.22647			42.212	1.0307
			32.525	1.11556			18.327	0.628591			27.401	0.939816				24.138	0.784731			4.433	0.144118			39.298	1.27758				29.355	0.716769			10.471	0.255673			28.526	0.696527
			36.095	1.23801			3.871	0.13277			34.824	1.19441				35.382	1.15027			3.513	0.114208			38.247	1.24342				41.393	1.0107			5.616	0.137127			37.323	0.911326
			27.049	0.927743			10.911	0.374232			22.454	0.770141				26.871	0.873581			5.722	0.186023			43.063	1.39999				38.074	0.929663			8.537	0.20845			47.624	1.16285
			35.806	1.2281			23.621	0.810167			25.755	0.883361				34.73	1.12908			5.613	0.18248			30.102	0.978621				29.998	0.732469			4.654	0.113638			40.166	0.980744
			30.878	1.05907			16.008	0.549052			31.91	1.09447				23.836	0.774912			8.886	0.288885			32.656	1.06165				46.312	1.13081			7.99	0.195094			30.563	0.746265
			27.619	0.947293			7.224	0.247773			29.578	1.01448				31.178	1.0136			4.565	0.148409			43.085	1.4007				44.356	1.08305			4.612	0.112612			37.033	0.904245
			39.499	1.35476			12.955	0.444339			30.301	1.03928				35.407	1.15109			6.273	0.203936			1.375	0.0447015				33.117	0.808627			10.826	0.264341			45.602	1.11348
			30.134	1.03355			16.738	0.57409			29.943	1.027				29.57	0.961326			6.309	0.205107			52.289	1.69992				53.166	1.29817			9.562	0.233478			48.299	1.17933
			31.971	1.09656			12.774	0.43813			33.543	1.15048				19.276	0.626666			17.633	0.573252			32.132	1.04462				50.172	1.22506			7.453	0.181982			36.549	0.892427
			30.177	1.03503			6.504	0.223078			26.706	0.915979				43.67	1.41972			5.742	0.186673			38.367	1.24732				26.057	0.636241			6.927	0.169138			39.006	0.95242
			30.119	1.03304			7.977	0.2736			48.142	1.6512				32.411	1.05369			7.764	0.252409			37.092	1.20587				53.825	1.31426			9.655	0.235749			32.55	0.794782
			30.269	1.03818			5.745	0.197046			21.646	0.742428				26.021	0.845947			5.011	0.162908			27.537	0.895233				40.464	0.98802			10.148	0.247786			41.004	1.00121
			23.321	0.799878			14.918	0.511667			35.459	1.21619				35.884	1.16659			4.25	0.138168			31.854	1.03558				28.022	0.684221			6.959	0.16992			45.932	1.12153
			33.828	1.16025			11.696	0.401157			35.603	1.22113				31.835	1.03496			4.434	0.14415			48.481	1.57613				46.35	1.13174			3.813	0.0931031			34.029	0.830895
			27.864	0.955697			19.545	0.670366			37.79	1.29614				26.383	0.857716			21.022	0.683429			39.587	1.28698				29.556	0.721677			10.745	0.262364			30.847	0.7532
			35.771	1.2269			14.508	0.497604			26.242	0.900064				23.476	0.763209			4.858	0.157934			41.028	1.33383				41.802	1.02069			4.502	0.109927			45.746	1.11699
			24.178	0.829272			9.868	0.338459			27.455	0.941668				33.806	1.09904			9.482	0.308261			38.723	1.25889				34.5	0.842396			8.042	0.196364			30.475	0.744116
			28.592	0.980666			9.402	0.322476			23.437	0.803857				30.433	0.989382			5.699	0.185275			41.316	1.34319				41.03	1.00184			2.498	0.0609943			50.373	1.22997
			34.115	1.1701			11.619	0.398516			32.973	1.13093				32.981	1.07222			17.105	0.556086			42.959	1.3966				26.732	0.652722			9.905	0.241853			39.77	0.971075
			27.778	0.952747			11.792	0.404449			38.385	1.31655				22.567	0.733657			18.569	0.603681			42.395	1.37827				41.8	1.02064			11.533	0.281604			49.808	1.21618
			30.364	1.04144			15.167	0.520207			42.247	1.44901				31.751	1.03223			6.587	0.214144			51.913	1.6877				31.582	0.771146			7.496	0.183032			28.608	0.698529
			31.763	1.08943			6.084	0.208673			37.666	1.29189				32.221	1.04751			2.411	0.078382			38.461	1.25037				45.846	1.11943			4.758	0.116177			31.384	0.766312
			29.3	1.00495			15.181	0.520687			38.61	1.32427				35.204	1.14449			17.688	0.57504			36.428	1.18428				34.806	0.849868			8.219	0.200686			40.167	0.980769
			34.351	1.17819			13.875	0.475893			34.325	1.1773				29.401	0.955832			20.532	0.667499			36.501	1.18665				44.922	1.09687			6.53	0.159445			31.139	0.760329
			35.015	1.20097			22.75	0.780293			36.425	1.24933				37.013	1.2033			8.128	0.264243			38.383	1.24784				32.511	0.79383			9.88	0.241243			35.976	0.878436
			33.388	1.14516			22.964	0.787633			28.764	0.986565				32.118	1.04416			25.691	0.835219			40.262	1.30892				34.224	0.835657			3.741	0.091345			38.73	0.945681
			30.874	1.05894			3.913	0.13421			33.219	1.13937				23.164	0.753066			5.626	0.182902			37.029	1.20382				45.078	1.10068			18.578	0.453624			33.41	0.815781
			34.428	1.18083			8.588	0.294556			45.27	1.5527				23.455	0.762526			14.512	0.471788			36.551	1.18828				48.873	1.19335			10.214	0.249398			35.973	0.878362
			27.356	0.938273			16.045	0.550321			32.219	1.10507				7.596	0.246947			13.253	0.430857			44.448	1.44501				56.42	1.37762			10.302	0.251547			36.412	0.889082
			22.152	0.759783			4.946	0.169641			29.487	1.01136				25.567	0.831188			5.847	0.190087			52.89	1.71946				39.236	0.958036			3.225	0.0787457			36.911	0.901266
			26.788	0.918791			17.361	0.595458			31.343	1.07502				37.603	1.22248			1.61	0.0523414			34.046	1.10684				62.079	1.5158			8.231	0.200979			40.41	0.986702
			30.002	1.02903			16.873	0.57872			31.732	1.08836				31.722	1.03129			28.273	0.91916			41.872	1.36127				60.537	1.47815			10.029	0.244881			26.432	0.645397
			35.391	1.21386			15.762	0.540615			25.534	0.875781				27.762	0.902547			5.505	0.178968			43.971	1.4295				47.884	1.1692			15.035	0.367114			29.036	0.70898
			28.325	0.971508			16.896	0.579509			26.019	0.892416				31.223	1.01507			26.542	0.862885			34.001	1.10538				45.329	1.10681			10.409	0.254159			44.617	1.08943
			32.574	1.11724			15.839	0.543256			26.511	0.90929				33.926	1.10294			24.041	0.781577			41.503	1.34927				46.794	1.14258			7.263	0.177343			42.274	1.03222
			34.066	1.16842			13.585	0.465947			33.966	1.16499				21.138	0.6872			8.174	0.265738			35.686	1.16016				23.958	0.584989			3.334	0.0814072			47.035	1.14847
			25.094	0.860689			9.937	0.340825			25.838	0.886208				27.717	0.901084			11.219	0.364732			49.672	1.61485				56.878	1.38881			5.25	0.128191			39.745	0.970464
			26.229	0.899618			12.129	0.416008			42.19	1.44706				40.133	1.30473			23.069	0.749977			41.323	1.34342				53.56	1.30779			6.829	0.166746			30.703	0.749683
			26.719	0.916425			12.28	0.421187			27.548	0.944858				45.336	1.47388			15.012	0.488043			39.936	1.29833				28.579	0.697821			12.709	0.310319			30.816	0.752443
			28.117	0.964374			3.462	0.118742			30.934	1.06099				22.98	0.747084			8.089	0.262975			40.898	1.3296				23.727	0.579349			4.772	0.116519			44.768	1.09311
			37.193	1.27567			10.15	0.348131			22.324	0.765682				24.515	0.796987			16.571	0.538726			55.615	1.80805				58.249	1.42228			4.154	0.101429			36.082	0.881024
			23.253	0.797546			7.94	0.272331			43.515	1.4925				29.192	0.949037			18.814	0.611646			37.65	1.22401				42.324	1.03344			7.996	0.195241			38.437	0.938527
			29.343	1.00642			9.082	0.3115			35.854	1.22974				34.853	1.13308			23.949	0.778586			38.657	1.25675				40.885	0.9983			4.665	0.113907			41.872	1.0224
			37.529	1.28719			9.972	0.342026			16.025	0.549635				33.948	1.10366			8.19	0.266258			49.471	1.60831				28.555	0.697235			7.123	0.173924			31.451	0.767948
			32.605	1.11831			17.418	0.597413			29.195	1.00135				31.931	1.03808			23.372	0.759828			33.332	1.08363				35.102	0.857095			14.415	0.351975			29.185	0.712618
			32.793	1.12475			5.383	0.184629			24.145	0.82814				25.656	0.834081			26.699	0.867989			40.403	1.31351				47.818	1.16759			4.702	0.11481			45.231	1.10442
			32.352	1.10963			15.412	0.52861			24.763	0.849337				38.179	1.24121			13.129	0.426826			35.459	1.15278				27.854	0.680119			4.458	0.108852			35.174	0.858853
			34.86	1.19565			5.178	0.177598			27.977	0.959572				32.435	1.05447			21.185	0.688728			37.362	1.21465				42.555	1.03908			11.583	0.282825			33.574	0.819785
			32.666	1.1204			8.601	0.295002			37.187	1.27546				33.489	1.08873			9.417	0.306148			40.702	1.32323				44.45	1.08535			8.786	0.21453			25.421	0.620711
			4.116	0.141173			6.029	0.206786			29.106	0.998295				36.68	1.19247			27.249	0.88587			47.661	1.54947				33.118	0.808651			5.797	0.141547			44.369	1.08337
			31.164	1.06888			11.65	0.399579			23.71	0.81322				27.15	0.882651			17.139	0.557192			49.381	1.60538				34.693	0.847108			15.528	0.379151			38.385	0.937257
			30.478	1.04535			17.421	0.597516			30.447	1.04429				45.707	1.48594			23.937	0.778196			34.724	1.12888				33.47	0.817246			9.192	0.224444			46.782	1.14229
			33.83	1.16032			6.442	0.220952			25.354	0.869607				34.837	1.13256			17.95	0.583558			34.569	1.12384				54.279	1.32535			2.492	0.0608478			41.657	1.01715
			27.952	0.958715			15.507	0.531869			34.623	1.18752				25.664	0.834341			12.334	0.40098			33.021	1.07352				34.434	0.840784			5.969	0.145747			36.903	0.901071
			31.402	1.07704			3.479	0.119325			41.808	1.43396				30.701	0.998095			19.271	0.626504			45.598	1.4824				38.671	0.94424			11.464	0.27992			40.241	0.982575
			29.935	1.02673			8.006	0.274595			44.998	1.54337				32.803	1.06643			10.094	0.328158			44.54	1.448				30.249	0.738598			4.807	0.117374			36.529	0.891938
			41.587	1.42638			11.406	0.39121			27.681	0.94942				30.374	0.987464			15.856	0.515481			40.81	1.32674				35.153	0.85834			5.255	0.128313			35.243	0.860538
			34.447	1.18148			8.393	0.287868			31.699	1.08723				35.195	1.1442			9.187	0.298671			43.363	1.40974				37.432	0.913987			9.566	0.233576			24.04	0.586991
			30.299	1.03921			25.636	0.879279			32.473	1.11378				26.492	0.861259			14.997	0.487555			44.989	1.4626				28.761	0.702265			7.43	0.18142			33.215	0.81102
			30.988	1.06285			10.967	0.376153			42.513	1.45814				39.58	1.28675			39.397	1.2808			34.671	1.12716				47.048	1.14878			12.546	0.306339			36.919	0.901461
			27.103	0.929595			6.702	0.229869			30.39	1.04233				28.194	0.916592			16.241	0.527998			42.686	1.38773				39.648	0.968096			6.888	0.168186			36.892	0.900802
			31.174	1.06922			5.962	0.204488			36.302	1.24511				35.972	1.16946			12.684	0.412359			39.188	1.27401				31.777	0.775908			7.393	0.180517			46.773	1.14207
			29.769	1.02104			8.731	0.299461			25.223	0.865114				30.629	0.995754			13.711	0.445747			36.477	1.18587				31.709	0.774247			8.477	0.206985			22.281	0.544041
			26.669	0.91471			7.142	0.244961			25.297	0.867652				30.859	1.00323			5.076	0.165022			44.766	1.45535				29.309	0.715646			9.919	0.242195			45.962	1.12227
			32.333	1.10898			2.858	0.0980254			32.784	1.12445				33.042	1.0742			26.068	0.847475			35.974	1.16952				35.714	0.872038			6.938	0.169407			32.356	0.790045
			27.219	0.933574			3.301	0.11322			27.081	0.928841				29.463	0.957847			26.169	0.850759			29.08	0.945396				31.134	0.760207			13.505	0.329755			36.482	0.890791
			27.197	0.932819			4.866	0.166897			31.562	1.08253				26.481	0.860902			10.472	0.340447			50.026	1.62635				37.074	0.905246			12.559	0.306656			21.515	0.525338
			32.889	1.12805			10.957	0.37581			31.004	1.06339				30.326	0.985903			32.048	1.04189			41.099	1.33614				40.51	0.989144			4.252	0.103822			32.435	0.791974
			28.055	0.962248			10.431	0.357769			26.252	0.900407				27.204	0.884407			18.518	0.602023			39.44	1.2822				50.194	1.2256			10.143	0.247664			37.16	0.907346
			24.252	0.83181			12.375	0.424445			29.253	1.00334				37.459	1.2178			14.063	0.457191			42.967	1.39686				42.456	1.03666			14.142	0.345309			42.118	1.02841
			31.15	1.0684			14.46	0.495958			27.045	0.927606				25.311	0.822865			7.975	0.259269			41.567	1.35135				35.071	0.856338			15.096	0.368603			33.538	0.818906
			32.762	1.12369			3.233	0.110887			30.184	1.03527				46.322	1.50594			12.827	0.417008			38.441	1.24972				38.282	0.934742			32.446	0.792243			43.167	1.05402
			26.945	0.924176			10.178	0.349091			41.448	1.42161				24.436	0.794419			13.592	0.441878			37.498	1.21907				44.944	1.09741			6.351	0.155074			34.785	0.849355
			25.973	0.890838			15.976	0.547955			36.956	1.26754				28.404	0.923419			16.834	0.547276			34.261	1.11383				33.353	0.814389			5.674	0.138544			30.604	0.747266
			22.17	0.7604			5.496	0.188505			41.716	1.4308				29.322	0.953263			31.575	1.02651			38.45	1.25002				40.266	0.983186			6.748	0.164768			34.224	0.835657
			23.373	0.801661			12.788	0.438611			24.851	0.852355				38.046	1.23688			24.84	0.807553			49.843	1.6204				35.556	0.86818			3.639	0.0888545			36.747	0.897261
			34.611	1.18711			4.619	0.158425			27.094	0.929287				31.886	1.03662			8.442	0.274451			31.453	1.02254				44.068	1.07602			8.305	0.202785			33.527	0.818638
			34.406	1.18008			7.61	0.261012			26.397	0.90538				27.967	0.909212			4.662	0.151562			43.927	1.42807				37.861	0.924462			9.826	0.239924			34.629	0.845546
			27.36	0.93841			8.385	0.287594			43.883	1.50513				29.412	0.956189			10.207	0.331831			42.576	1.38415				35.485	0.866447			3.602	0.087951			36.247	0.885053
			26.356	0.903974			13.159	0.451335			25.116	0.861444				32.46	1.05528			30.604	0.994941			32.494	1.05639				62.723	1.53152			11.924	0.291152			40.055	0.978034
			27.352	0.938136			8.373	0.287182			0.921	0.031589				32.541	1.05791			6.546	0.212812			47.83	1.55496				55.703	1.36012			23.009	0.561817			3.604	0.0879998
			28.882	0.990612			8.684	0.297849			27.733	0.951203				0.997	0.0324126			6.262	0.203579			44.66	1.4519				52.349	1.27822			15.033	0.367065			28.444	0.694525
			20.603	0.706654			9.604	0.329404			25.098	0.860827				19.286	0.626991			1.189	0.0386546			39.35	1.27928				47.968	1.17125			26.995	0.659144			25.697	0.627451
			29.453	1.0102			3.482	0.119428			37.147	1.27409				21.456	0.697538			5.257	0.170906			42.748	1.38974				32.871	0.80262			2.052	0.0501042			34.247	0.836218
			37.881	1.29927			14.84	0.508991			38.946	1.33579				29.634	0.963406			5.014	0.163006			38.274	1.24429				39.166	0.956327			9.308	0.227276			36.592	0.893477
			26.293	0.901813			2.903	0.0995689			34.48	1.18262				34.016	1.10587			27.817	0.904335			44.31	1.44053				48.592	1.18648			3.257	0.0795271			48.436	1.18267
			38.897	1.33411			5.017	0.172076			31.332	1.07464				31.711	1.03093			9.664	0.314178			35.211	1.14472				36.756	0.897481			11.209	0.273693			31.81	0.776713
			27.504	0.943349			22.803	0.782111			24.941	0.855442				22.204	0.721856			7.775	0.252767			42.283	1.37463				42.324	1.03344			8.274	0.202028			24.132	0.589238
			29.159	1.00011			5.799	0.198898			28.214	0.967701				31.934	1.03818			7.308	0.237584			47.369	1.53997				13.501	0.329658			15.575	0.380299			32.997	0.805697
			26.231	0.899687			5.179	0.177633			24.352	0.83524				27.091	0.880733			12.816	0.41665			34.604	1.12498				46.137	1.12654			23.145	0.565138			38.368	0.936842
			31.672	1.08631			9.679	0.331976			42.591	1.46081				27.433	0.891852			7.468	0.242786			45.808	1.48923				43.015	1.05031			15.772	0.385109			30.22	0.73789
			25.852	0.886688			12.715	0.436107			24.73	0.848205				23.438	0.761973			4.818	0.156634			44.209	1.43724				44.341	1.08269			14.383	0.351194			47.563	1.16136
			40.025	1.3728			19.542	0.670263			37.156	1.2744				26.439	0.859536			10.239	0.332872			32.314	1.05053				45.794	1.11816			5.623	0.137298			35.886	0.876238
			24.654	0.845598			8.682	0.297781			22.821	0.782729				26.942	0.875889			11.235	0.365252			42.72	1.38883				38.658	0.943923			4.108	0.100306			33.492	0.817783
			35.704	1.2246			8.954	0.30711			36.956	1.26754				31.319	1.01819			8.862	0.288105			39.456	1.28272				27.552	0.672745			6.493	0.158541			39.015	0.95264
			21.382	0.733373			10.376	0.355882			22.495	0.771547				21.605	0.702382			9.127	0.29672			34.919	1.13522				43.645	1.06569			3.305	0.0806991			16.538	0.403813
			25.774	0.884012			5.195	0.178181			36.204	1.24175				28.168	0.915747			25.637	0.833463			48.649	1.58159				35.775	0.873528			8.552	0.208816			35.277	0.861368
			25.795	0.884733			3.589	0.123098			24.97	0.856436				26.183	0.851214			12.233	0.397697			39.568	1.28636				43.22	1.05531			8.025	0.195949			31.934	0.779741
			35.518	1.21822			4.664	0.159969			35.318	1.21136				40.963	1.33171			7.256	0.235894			36.887	1.1992				37.886	0.925073			4.793	0.117032			35.363	0.863468
			24.774	0.849714			13.643	0.467936			33.022	1.13261				21.909	0.712265			10.753	0.349582			40.051	1.30206				48.877	1.19344			3.67	0.0896114			36.096	0.881366
			33.429	1.14657			10.999	0.37725			23.867	0.818605				42.782	1.39085			11.665	0.379231			31.242	1.01568				35.904	0.876678			4.876	0.119059			27.681	0.675894
			33.204	1.13885			3.828	0.131295			33.714	1.15634				33.222	1.08005			13.119	0.426501			41.352	1.34436				38.704	0.945046			3.956	0.0965947			30.638	0.748096
			26.095	0.895022			9.369	0.321344			31.592	1.08356				36.889	1.19927			11.9	0.386871			39.749	1.29225				33.014	0.806112			4.422	0.107973			38.764	0.946511
			30.447	1.04429			8.36	0.286736			30.085	1.03187				31.71	1.0309			6.986	0.227116			34.493	1.12137				39.246	0.95828			2.228	0.0544017			29.143	0.711593
			26.568	0.911246			5.879	0.201642			33.428	1.14653				31.692	1.03031			10.58	0.343958			34.98	1.13721				37.394	0.913059			18.834	0.459875			43.819	1.06994
			24.94	0.855407			4.367	0.149782			35.699	1.22443				27.202	0.884342			15.666	0.509304			37.719	1.22625				45.059	1.10022			16.229	0.396268			37.335	0.911619
			24.929	0.85503			3.803	0.130438			38.488	1.32008				33.743	1.09699			10.386	0.337651			35.418	1.15145				37.427	0.913865			7.482	0.18269			29.789	0.727366
			28.847	0.989412			6.341	0.217487			29.266	1.00378				30.297	0.984961			3.806	0.123734			42.559	1.3836				54.54	1.33172			4.171	0.101844			34.132	0.83341
			36.336	1.24627			16.644	0.570866			33.956	1.16464				32.044	1.04176			10.174	0.330758			28.629	0.930734				26.302	0.642223			12.791	0.312321			38.348	0.936353
			38.63	1.32496			8.432	0.289206			36.654	1.25718				34.469	1.12059			12.113	0.393796			23.887	0.77657				32.165	0.785382			19.192	0.468616			30.983	0.75652
			31.592	1.08356			4.443	0.152389			20.886	0.716361				38.551	1.2533			7.966	0.258976			35.571	1.15642				41.158	1.00497			8.956	0.218681			37.856	0.92434
			32.269	1.10678			15.306	0.524975			29.392	1.0081				38.111	1.239			15.844	0.515091			43.396	1.41081				41.508	1.01351			16.407	0.400614			33.043	0.80682
			34.275	1.17558			8.937	0.306527			29.49	1.01147				28.759	0.93496			10.036	0.326272			42.656	1.38675				38.914	0.950174			11.081	0.270568			31.82	0.776958
			25.755	0.883361			6.347	0.217693			24.213	0.830472				33.818	1.09943			9.262	0.301109			40.446	1.31491				53.581	1.3083			3.626	0.088537			29.936	0.730955
			36.813	1.26263			7.477	0.256451			41.712	1.43066				24.889	0.809146			12.892	0.419121			38.142	1.24				38.752	0.946218			3.512	0.0857535			41.765	1.01979
			21.446	0.735568			5.676	0.194679			44.277	1.51864				29.604	0.962431			8.971	0.291649			39.379	1.28022				37.152	0.90715			2.159	0.0527169			31.441	0.767703
			25.497	0.874512			12.78	0.438336			33.395	1.1454				38.708	1.2584			11.017	0.358165			39.175	1.27359				44.167	1.07844			4.818	0.117642			40.776	0.995639
			37.332	1.28044			13.435	0.460802			27.34	0.937724				25.823	0.83951			5.26	0.171004			50.812	1.65191				39.384	0.96165			14.606	0.356639			44.035	1.07521
			34.086	1.1691			3.522	0.1208			32.767	1.12386				23.8	0.773742			13.617	0.442691			46.348	1.50678				35.128	0.85773			7.292	0.178051			36.205	0.884027
			26.895	0.922461			5.943	0.203837			30.924	1.06065				41.361	1.34465			21.907	0.7122			39.455	1.28269				43.082	1.05194			4.456	0.108803			39.011	0.952542
			39.211	1.34488			6.338	0.217385			35.556	1.21952				26.939	0.875792			9.954	0.323606			33.81	1.09917				44.415	1.08449			11.955	0.291908			41.479	1.0128
			34.707	1.1904			3.681	0.126253			34.022	1.16691				22.579	0.734047			15.545	0.505371			31.069	1.01006				45.929	1.12146			2.041	0.0498357			38.364	0.936744
			33.072	1.13432			5.266	0.180616			39.356	1.34986				32.227	1.04771			6.473	0.210438			43.894	1.427				36.24	0.884882			5.2	0.12697			31.919	0.779375
			31.153	1.0685			6.263	0.214812			29.059	0.996683				37.66	1.22433			13.189	0.428777			42.634	1.38604				40.771	0.995517			5.409	0.132073			37.704	0.920629
			31.295	1.07338			15.337	0.526038			32.314	1.10833				28.72	0.933692			8.635	0.280725			27.503	0.894127				35.607	0.869426			14.532	0.354832			31.698	0.773979
			32.919	1.12908			6.01	0.206135			41.779	1.43296				28.78	0.935643			17.062	0.554689			42.339	1.37645				40.058	0.978107			5.325	0.130022			32.079	0.783282
			38.759	1.32938			10.875	0.372997			24.675	0.846318				28.437	0.924492			12.428	0.404036			44.869	1.4587				46.04	1.12417			21.516	0.525362			30.677	0.749049
			29.031	0.995723			4.288	0.147072			32.708	1.12184				25.473	0.828132			8.554	0.278092			33.179	1.07865				40.043	0.977741			7.724	0.188599			41.232	1.00677
			19.285	0.661449			13.009	0.446191			32.571	1.11714				29.835	0.969941			5.49	0.178481			43.058	1.39982				33.597	0.820347			4.304	0.105092			20.652	0.504265
			28.398	0.974012			4.369	0.149851			36.531	1.25296				28.144	0.914966			8.142	0.264698			34.517	1.12215				43.464	1.06127			19.99	0.488101			35.97	0.878289
			37.826	1.29738			6.21	0.212994			40.153	1.37719				31.027	1.00869			12.187	0.396201			43.742	1.42206				55.788	1.36219			4.727	0.11542			31.739	0.77498
			40.278	1.38148			4.104	0.140762			49.855	1.70996				27.542	0.895395			10.362	0.33687			37.069	1.20512				33.505	0.818101			7.853	0.191749			32.098	0.783746
			24.295	0.833285			8.746	0.299976			37.993	1.30311				23.894	0.776798			8.438	0.274321			32.983	1.07228				26.481	0.646594			7.356	0.179613			33.12	0.8087
			37.618	1.29025			9.473	0.324911			34.52	1.18399				31.183	1.01376			5.147	0.16733			39.067	1.27007				32.08	0.783306			7.49	0.182885			41.748	1.01937
			21.261	0.729223			4.388	0.150502			26.677	0.914984				25.009	0.813047			5.211	0.169411			30.412	0.988699				48.421	1.18231			6.843	0.167087			46.308	1.13071
			22.959	0.787462			6.321	0.216802			38.454	1.31892				24.861	0.808235			8.356	0.271655			35.426	1.15171				34.41	0.840198			9.178	0.224102			37.56	0.917113
			30.752	1.05475			4.571	0.156779			36.256	1.24353				22.194	0.721531			6.468	0.210276			38.191	1.2416				39.476	0.963896			4.27	0.104262			40.296	0.983918
			29.156	1.00001			16.405	0.562669			38.451	1.31882				16.736	0.54409			15.025	0.488465			34.185	1.11136				34.485	0.84203			6.494	0.158566			27.98	0.683195
			30.162	1.03451			9.532	0.326934			28.914	0.99171				29.112	0.946436			22.145	0.719938			38.787	1.26097				33.06	0.807235			5.752	0.140448			38.265	0.934327
			25.807	0.885144			6.55	0.224656			28.328	0.971611				21.683	0.704918			10.033	0.326175			40.307	1.31039				36.592	0.893477			5.229	0.127678			38.909	0.950052
			35.714	1.22494			5.111	0.1753			36.674	1.25787				27.234	0.885382			10.47	0.340381			43.603	1.41754				34.217	0.835486			4.348	0.106166			30.776	0.751466
			31.641	1.08524			8.989	0.30831			23.749	0.814558				26.852	0.872963			10.167	0.330531			31.644	1.02875				39.268	0.958817			12.399	0.30275			30.335	0.740698
			39.484	1.35425			5.467	0.187511			35.1	1.20388				25.166	0.818151			12.02	0.390772			42.763	1.39023				44.894	1.09619			4.599	0.112295			18.217	0.444809
			43.306	1.48534			8.564	0.293733			34.732	1.19126				35.839	1.16513			4.544	0.147726			31.782	1.03324				37.587	0.917772			21.468	0.52419			47.264	1.15406
			37.202	1.27598			15.156	0.51983			46.967	1.6109				25.527	0.829887			5.349	0.173897			36.638	1.19111				42.322	1.03339			9.209	0.224859			50.671	1.23725
			36.209	1.24192			3.267	0.112054			45.807	1.57112				32.211	1.04719			12.869	0.418373			44.196	1.43682				35.295	0.861808			8.118	0.198219			36.921	0.90151
			30.731	1.05403			6.845	0.234774			23.464	0.804783				29.101	0.946078			14.314	0.465351			46.959	1.52665				44.358	1.0831			5.36	0.130877			39.754	0.970684
			26.738	0.917076			4.777	0.163844			30.695	1.0528				27.599	0.897248			4.883	0.158747			46.083	1.49817				42.885	1.04713			7.398	0.180639			40.046	0.977814
			33.918	1.16334			8.926	0.306149			27.903	0.957034				22.652	0.73642			24.203	0.786844			35.106	1.1413				44.487	1.08625			9.223	0.2252			40.899	0.998642
			34.474	1.18241			19.745	0.677226			30.094	1.03218				19.462	0.632713			10.462	0.340121			37.877	1.23139				33.922	0.828283			10.794	0.26356			42.123	1.02853
			45.828	1.57184			9.386	0.321927			25.217	0.864908				35.071	1.14016			8.054	0.261837			34.296	1.11497				36.133	0.882269			9.611	0.234674			47.722	1.16524
			32.526	1.1156			4.632	0.158871			26.701	0.915807				33.073	1.07521			7.62	0.247728			46.654	1.51673				16.442	0.401469			10.507	0.256552			38.342	0.936207
			28.685	0.983856			5.987	0.205346			34.527	1.18423				28.59	0.929466			4.449	0.144638			39.804	1.29403				37.367	0.9124			4.794	0.117056			40.454	0.987776
			28.163	0.965952			8.336	0.285913			27.149	0.931173				22.245	0.723189			6.171	0.20062			30.825	1.00213				38.363	0.93672			5.742	0.140204			30.93	0.755226
			38.788	1.33037			3.457	0.11857			39.306	1.34814				29.771	0.96786			7.4	0.240575			42.734	1.38929				46.332	1.1313			7.048	0.172093			41.162	1.00506
			23.468	0.80492			8.185	0.280734			29.724	1.01949				22.178	0.721011			8.02	0.260732			41.722	1.35639				35.497	0.86674			9.881	0.241267			49.996	1.22077
			29.781	1.02145			16.556	0.567848			32.31	1.10819				37.609	1.22268			11.713	0.380792			33.181	1.07872				38.527	0.940724			3.832	0.093567			49.758	1.21495
			34.051	1.1679			11.481	0.393782			23.302	0.799226				26.109	0.848808			9.886	0.321396			34.214	1.1123				42.281	1.03239			5.733	0.139984			50.848	1.24157
			32.257	1.10637			8.796	0.301691			27.447	0.941394				28.569	0.928783			5.772	0.187649			50.218	1.6326				43.124	1.05297			5.121	0.125041			43.112	1.05268
			29.992	1.02868			8.334	0.285845			31.313	1.07399				27.748	0.902092			10.04	0.326402			33.071	1.07514				37.346	0.911887			5.147	0.125676			47.08	1.14957
			26.524	0.909736			10.781	0.369773			30.015	1.02947				24.301	0.79003			4.855	0.157837			34.236	1.11302				43.601	1.06462			6.178	0.15085			58.383	1.42555
			31.292	1.07327			5.635	0.193273			25.144	0.862404				24.993	0.812527			4.435	0.144183			41.085	1.33568				44.378	1.08359			12.561	0.306705			45.104	1.10132
			34.259	1.17504			9.758	0.334686			28.045	0.961905				30.821	1.002			7.463	0.242623			37.842	1.23025				35.628	0.869939			7.059	0.172362			46.792	1.14253
			33.62	1.15312			7.552	0.259023			30.931	1.06089				33.601	1.09237			17.441	0.56701			48.864	1.58858				42.918	1.04794			4.886	0.119303			39.325	0.960209
			22.722	0.779333			6.457	0.221466			29.716	1.01922				24.085	0.783007			13.6	0.442138			36.769	1.19537				33.202	0.810702			7.175	0.175194			50.467	1.23227
			30.455	1.04456			9.308	0.319251			43.884	1.50516				22.969	0.746726			8.826	0.286935			32.488	1.05619				45.897	1.12068			8.556	0.208914			40.294	0.98387
			38.966	1.33648			6.551	0.22469			41.755	1.43214				25.37	0.824783			16.572	0.538759			40.205	1.30707				36.72	0.896602			4.837	0.118106			51.709	1.26259
			29.463	1.01054			7.11	0.243863			35.656	1.22295				35.572	1.15645			5.126	0.166647			36.633	1.19095				39.689	0.969097			5.574	0.136102			29.027	0.70876
			26.027	0.89269			6.39	0.219168			35.039	1.20179				27.356	0.889348			13.542	0.440253			41.134	1.33727				42.532	1.03852			8.77	0.214139			33.107	0.808383
			33.493	1.14876			5.344	0.183292			32.779	1.12427				32.552	1.05827			19.489	0.633591			43.892	1.42694				33.672	0.822178			13.09	0.319622			43.359	1.05871
			29.925	1.02639			2.695	0.0924348			45.321	1.55445				27.063	0.879823			5.364	0.174385			38.599	1.25486				42.095	1.02785			6.202	0.151436			35.671	0.870988
			33.548	1.15065			3.693	0.126665			23.62	0.810133				24.598	0.799685			9.363	0.304393			51.351	1.66943				37.726	0.921166			4.461	0.108925			42.246	1.03153
			36.002	1.23482			5.398	0.185144			27.022	0.926817				26.706	0.868217			4.52	0.146946			38.985	1.26741				31.366	0.765872			4.06	0.0991341			34.045	0.831286
			28.696	0.984233			2.903	0.0995689			41.675	1.42939				26.456	0.860089			21.434	0.696823			24.488	0.796109				36.938	0.901925			8.306	0.20281			44.535	1.08742
			28.714	0.98485			5.335	0.182983			28.446	0.975658				17.11	0.556249			5.369	0.174547			35.177	1.14361				48.252	1.17818			5.286	0.12907			37.594	0.917943
			25.156	0.862816			6.364	0.218276			31.971	1.09656				22.275	0.724164			11.75	0.381995			36.453	1.18509				43.297	1.05719			3.261	0.0796247			54.578	1.33265
			24.491	0.840007			8.964	0.307453			26.804	0.91934				31.014	1.00827			7.657	0.24893			31.189	1.01396				35.631	0.870012			7.224	0.17639			41.398	1.01083
			37.517	1.28678			4.495	0.154172			40.666	1.39479				27.769	0.902775			5.058	0.164436			27.78	0.903133				35.682	0.871257			4.585	0.111953			49.174	1.20069
			30.92	1.06051			5.824	0.199755			31.639	1.08517				24.962	0.811519			19.036	0.618864			38.989	1.26754				42.715	1.04298			10.639	0.259775			45.718	1.11631
			27.738	0.951375			7.875	0.270102			23.981	0.822515				23.63	0.768215			4.688	0.152408			44.652	1.45164				44.729	1.09216			12.405	0.302896			35.863	0.875677
			32.443	1.11275			2.757	0.0945613			32.505	1.11488				28.604	0.929921			3.209	0.104325			39.239	1.27567				31.837	0.777373			7.053	0.172215			48.525	1.18485
			31.37	1.07595			7.353	0.252198			21.309	0.730869				38.931	1.26565			4.373	0.142167			37.114	1.20658				41.925	1.02369			12.878	0.314446			29.513	0.720627
			23.493	0.805777			5.221	0.179073			22.919	0.78609				16.549	0.538011			29.2	0.949297			32.805	1.0665				35.484	0.866422			10.578	0.258286			43.167	1.05402
			33.323	1.14293			5.028	0.172453			31.089	1.06631				29.986	0.97485			19.326	0.628292			35.62	1.15801				37.613	0.918407			3.626	0.088537			49.834	1.21681
			27.291	0.936043			4.933	0.169195			26.14	0.896566				36.206	1.17706			10.58	0.343958			41.405	1.34608				40.085	0.978766			8.295	0.202541			43.542	1.06318
			32.182	1.1038			6.134	0.210388			23.974	0.822275				22.263	0.723774			6.03	0.196036			31.115	1.01155				38.934	0.950662			14.783	0.360961			41.113	1.00387
			35.753	1.22628			8.563	0.293699			25.285	0.86724				23.31	0.757812			9.418	0.306181			40.325	1.31097				35.368	0.86359			11.663	0.284779			53.035	1.29497
			29.186	1.00104			9.766	0.33496			22.354	0.766711				25.51	0.829334			9.453	0.307319			37.628	1.22329				42.834	1.04589			7.966	0.194508			41.66	1.01722
			32.135	1.10219			10.188	0.349434			29.312	1.00536				26.568	0.86373			11.775	0.382807			33.851	1.1005				48.373	1.18114			4.677	0.1142			50.659	1.23695
			27.973	0.959435			4.032	0.138292			30.23	1.03685				33.572	1.09143			13.642	0.443504			39.618	1.28799				44.781	1.09343			13.964	0.340963			34.918	0.852602
			35.828	1.22885			4.384	0.150365			28.928	0.99219				33.305	1.08275			8.217	0.267136			45.951	1.49387				42.41	1.03554			11.518	0.281238			47.528	1.1605
			24.329	0.834451			6.43	0.22054			19.551	0.670572				25.171	0.818314			9.12	0.296493			48.45	1.57512				36.831	0.899312			12.253	0.299185			49.5	1.20865
			33.632	1.15353			8.109	0.278127			25.825	0.885762				28.313	0.92046			4.988	0.162161			39.522	1.28487				36.807	0.898726			7.553	0.184424			32.806	0.801033
			35.625	1.22189			3.861	0.132427			34.753	1.19198				34.146	1.11009			24.868	0.808463			31.416	1.02134				39.434	0.962871			9.742	0.237873			45.201	1.10369
			31.804	1.09083			9.663	0.331427			24.139	0.827934				30.524	0.99234			6.554	0.213072			35.76	1.16256				51.073	1.24706			10.668	0.260483			60.459	1.47624
			33.764	1.15806			6.185	0.212137			20.536	0.704356				28.58	0.929141			6.431	0.209073			38.536	1.25281				45.137	1.10212			4.059	0.0991097			46.239	1.12903
			24.215	0.830541			6.796	0.233093			26.807	0.919443				21.83	0.709697			4.182	0.135958			27.672	0.899621				35.06	0.85607			10.483	0.255966			39.29	0.959355
			35.013	1.2009			5.358	0.183772			29.113	0.998535				27.198	0.884212			24.184	0.786226			24.301	0.79003				45.732	1.11665			9.446	0.230646			45.585	1.11306
			11.749	0.402974			5.003	0.171596			31.248	1.07176				29.25	0.950923			7.996	0.259951			41.58	1.35177				59.378	1.44985			12.178	0.297354			50.595	1.23539
			33.083	1.1347			6.15	0.210936			38.269	1.31257				23.618	0.767825			8.221	0.267266			45.131	1.46722				29.209	0.713204			13.023	0.317986			27.851	0.680045
			30.531	1.04717			7.137	0.244789			24.275	0.832599				17.469	0.56792			5.989	0.194703			39.351	1.27931				32.619	0.796467			10.023	0.244734			41.135	1.0044
			29.182	1.0009			10.603	0.363668			22.209	0.761738				27.696	0.900402			6.978	0.226856			39.93	1.29813				35.317	0.862345			8.802	0.214921			58.518	1.42885
			33.89	1.16238			9.814	0.336607			30.239	1.03716				27.33	0.888503			13.956	0.453712			42.752	1.38987				53.892	1.3159			13.657	0.333467			39.091	0.954496
			29.523	1.0126			8.145	0.279362			24.946	0.855613				23.957	0.778846			4.934	0.160405			38.73	1.25912				35.893	0.876409			7.022	0.171458			57.463	1.40309
			30.54	1.04748			4.936	0.169298			35.76	1.22652				27.292	0.887268			14.589	0.474291			40.09	1.30333				43.961	1.07341			12.058	0.294423			42.742	1.04364
			34.523	1.18409			7.729	0.265094			23.768	0.815209				27.057	0.879628			46.795	1.52131			33.688	1.0952				35.88	0.876092			5.926	0.144697			60.298	1.47231
			30.348	1.04089			9.335	0.320178			22.794	0.781803				29.242	0.950662			22.411	0.728585			43.928	1.42811				42.129	1.02868			7.773	0.189795			45.55	1.11221
			39.754	1.36351			9.099	0.312083			39.005	1.33782				33.162	1.0781			11.484	0.373347			43.543	1.41559				35.765	0.873284			4.909	0.119864			54.204	1.32351
			30.884	1.05928			9.748	0.334343			17.804	0.610652				26.852	0.872963			44.364	1.44228			35.69	1.16029				42.344	1.03392			7.709	0.188233			34.489	0.842127
			32.683	1.12098			3.72	0.127591			31.955	1.09601				35.302	1.14767			25.312	0.822897			42.638	1.38617				38.388	0.93733			10.186	0.248714			35.352	0.863199
			42.094	1.44377			5.571	0.191078			33.01	1.1322				23.692	0.770231			22.68	0.737331			40.066	1.30255				52.858	1.29065			17.047	0.416241			46.412	1.13325
			32.453	1.11309			4.487	0.153898			25.014	0.857945				29.875	0.971241			25.563	0.831058			49.782	1.61842				48.261	1.1784			9.661	0.235895			1.855	0.045294
			26.374	0.904592			11.277	0.386785			30.108	1.03266				20.012	0.650594			23.427	0.761616			38.331	1.24615				41.457	1.01227			8.957	0.218705			42.804	1.04516
			26.068	0.894096			7.36	0.252438			25.431	0.872248				24.511	0.796857			5.526	0.179651			26.433	0.859341				49.042	1.19747			10.296	0.2514			51.599	1.25991
			37.137	1.27375			8.342	0.286119			27.413	0.940228				27.052	0.879465			21.072	0.685054			42.622	1.38565				44.892	1.09614			11.427	0.279016			49.335	1.20463
			27.736	0.951306			2.42	0.0830026			27.945	0.958475				28.114	0.913991			20.342	0.661322			32.871	1.06864				36.751	0.897359			17.168	0.419196			49.666	1.21271
			34.382	1.17925			1.312	0.0449998			35.279	1.21002				28.036	0.911455			11.312	0.367755			37.729	1.22658				37.299	0.91074			3.518	0.0859			39.815	0.972174
			28.585	0.980426			4.07	0.139595			24.37	0.835857				25.223	0.820004			12.05	0.391748			43.684	1.42017				15.725	0.383962			5.335	0.130266			55.474	1.35452
			30.62	1.05022			5.915	0.202876			27.228	0.933883				23.365	0.7596			9.291	0.302052			33.41	1.08616				40.381	0.985994			11.183	0.273058			53.34	1.30242
			27.079	0.928772			8.762	0.300524			27.983	0.959778				12.637	0.410831			6.901	0.224353			32.677	1.06233				52.19	1.27434			10.005	0.244295			41.885	1.02272
			27.802	0.95357			7.508	0.257514			32.809	1.1253				26.613	0.865193			22.74	0.739281			33.571	1.0914				42.266	1.03202			9.113	0.222515			34.843	0.850771
			28.659	0.982964			5.733	0.196634			43.092	1.478				24.189	0.786389			17.575	0.571366			37.166	1.20827				45.355	1.10745			16.121	0.393631			26.794	0.654236
			28.571	0.979946			5.138	0.176226			31.021	1.06398				26.047	0.846792			10.045	0.326565			33.414	1.08629				44.797	1.09382			11.678	0.285145			46.025	1.1238
			29.436	1.00961			6.229	0.213646			33.038	1.13316				24.349	0.79159			10.086	0.327898			33.561	1.09107				47.438	1.15831			13.827	0.337618			48.213	1.17723
			38.566	1.32276			6.241	0.214058			21.011	0.720648				26.375	0.857456			10.736	0.349029			42.743	1.38958				40.695	0.993661			15.942	0.38926			46.618	1.13828
			25.708	0.881749			10.796	0.370288			23.62	0.810133				6.71	0.218143			13.969	0.454135			40.809	1.32671				50.585	1.23515			11.634	0.284071			51.908	1.26745
			33.263	1.14087			2.114	0.0725073			34.382	1.17925				29.748	0.967113			25.45	0.827384			16.088	0.523024				47.594	1.16212			5.94	0.145039			47.161	1.15154
			32.374	1.11038			11.24	0.385516			25.623	0.878833				24.09	0.78317			3.798	0.123474			44.896	1.45958				48.814	1.1919			12.959	0.316423			52.397	1.27939
			23.699	0.812843			3.174	0.108864			27.942	0.958372				34.594	1.12466			28.132	0.914576			42.241	1.37326				38.203	0.932813			6.319	0.154293			40.919	0.99913
			27.171	0.931928			2.488	0.0853349			33.751	1.15761				23.294	0.757292			14.884	0.483881			42.832	1.39248				39.976	0.976105			17.203	0.42005			49.25	1.20255
			34.14	1.17095			4.744	0.162713			24.633	0.844878				27.92	0.907684			9.39	0.305271			36.135	1.17476				37.47	0.914915			3.981	0.0972052			43.984	1.07397
			34.958	1.19901			7.851	0.269278			26.325	0.902911				34.857	1.13321			5.067	0.164729			30.187	0.981385				51.265	1.25175			19.399	0.473671			49.928	1.21911
			32.3	1.10785			2.796	0.0958989			24.501	0.84035				31.839	1.03509			22.848	0.742792			40.063	1.30245				44.573	1.08835			11.936	0.291445			36.557	0.892622
			34.113	1.17003			5.566	0.190906			23.066	0.791132				31.123	1.01181			21.021	0.683396			40.593	1.31969				46.311	1.13079			16.339	0.398954			45.191	1.10344
			33.576	1.15161			6.835	0.234431			47.999	1.6463				22.278	0.724262			19.92	0.647603			44.975	1.46214				36.777	0.897994			11.168	0.272692			42.761	1.04411
			24.082	0.825979			13.871	0.475756			35.984	1.2342				24.296	0.789867			6.367	0.206992			27.166	0.883171				42.743	1.04367			6.765	0.165183			46.037	1.1241
			34.856	1.19551			17.022	0.583831			38.863	1.33295				34.889	1.13425			13.846	0.450136			32.364	1.05216				52.132	1.27292			6.469	0.157955			51.296	1.25251
			13.136	0.450547			10.862	0.372552			25.278	0.867				21.755	0.707259			26.587	0.864348			38.467	1.25057				34.499	0.842371			6.896	0.168381			40.837	0.997128
			26.546	0.910491			15.728	0.539449			31.305	1.07372				27.781	0.903165			26.112	0.848906			33.918	1.10268				42.662	1.04169			7.953	0.194191			44.851	1.09514
			35.894	1.23111			15.143	0.519384			37.487	1.28575				35.937	1.16832			11.569	0.37611			35.791	1.16357				57.452	1.40282			7.734	0.188843			50.391	1.23041
			33.398	1.14551			14.044	0.48169			30.647	1.05115				35.267	1.14654			7.726	0.251174			33.546	1.09059				44.95	1.09756			8.01	0.195582			45.256	1.10503
			29.738	1.01997			14.25	0.488755			39.554	1.35665				38.273	1.24426			8.2	0.266583			22.982	0.747149				52.633	1.28515			24.524	0.598809			63.604	1.55304
			22.399	0.768255			18.672	0.640424			35.432	1.21527				33.03	1.07381			3.495	0.113623			26.075	0.847703				40.025	0.977301			3.534	0.0862906			46.024	1.12378
			24.459	0.83891			12.114	0.415493			40.222	1.37956				38.265	1.244			4.156	0.135112			35.801	1.1639				51.072	1.24704			27.95	0.682463			54.212	1.32371
			29.662	1.01737			7.934	0.272125			39.463	1.35353				28.995	0.942632			18.818	0.611776			34.456	1.12017				43.896	1.07182			10.768	0.262925			45.647	1.11458
			29.017	0.995243			15.812	0.54233			39.843	1.36656				30.186	0.981352			6.782	0.220484			28.156	0.915356				35.223	0.86005			6.491	0.158493			47.947	1.17073
			32.707	1.1218			11.747	0.402906			29.775	1.02124				34.769	1.13035			19.535	0.635086			33.556	1.09091				35.587	0.868937			9.519	0.232428			45.356	1.10747
			25.294	0.867549			12.615	0.432677			32.475	1.11385				35.057	1.13971			11.745	0.381832			26.669	0.867014				46.288	1.13023			6.214	0.151729			46.484	1.13501
			34.006	1.16636			11.401	0.391038			40.403	1.38577				33.188	1.07895			9.943	0.323249			36.676	1.19234				54.993	1.34278			5.857	0.143012			49.818	1.21642
			29.131	0.999153			14.96	0.513107			36.903	1.26572				30.43	0.989285			17.397	0.565579			31.458	1.0227				57.648	1.40761			5.715	0.139545			49.26	1.20279
			32.952	1.13021			18.546	0.636102			28.259	0.969244				33.508	1.08935			19.622	0.637915			39.966	1.2993				54.599	1.33316			9.344	0.228155			37.806	0.923119
			31.389	1.0766			16.435	0.563698			36.503	1.252				28.84	0.937593			7.497	0.243729			33.637	1.09354				58.47	1.42768			5.171	0.126262			41.344	1.00951
			23.868	0.818639			16.795	0.576045			37.447	1.28438				33.691	1.0953			27.808	0.904043			34.703	1.1282				44.834	1.09472			8.57	0.209256			40.75	0.995004
			24.853	0.852423			12.974	0.44499			32.933	1.12956				33.403	1.08594			18.34	0.596237			40.869	1.32866				41.744	1.01927			14.511	0.354319			47.42	1.15787
			20.952	0.718625			18.129	0.6218			27.541	0.944618				40.623	1.32066			12.885	0.418894			41.114	1.33662				45.053	1.10007			15.772	0.385109			48.059	1.17347
			5.166	0.177187			21.272	0.7296			39.673	1.36073				34.432	1.11939			10.958	0.356246			40.601	1.31995				55.889	1.36466			12.61	0.307902			54.849	1.33926
			40.233	1.37994			16.397	0.562394			40.525	1.38995				34.173	1.11097			17.757	0.577283			35.638	1.1586				49.878	1.21788			6.52	0.159201			44.482	1.08613
			34.461	1.18196			16.3	0.559067			30.647	1.05115				27.829	0.904726			9.099	0.29581			32.277	1.04933				48.996	1.19635			10.272	0.250814			54.602	1.33323
			40.568	1.39143			34.621	1.18745			28.498	0.977442				36.305	1.18028			11.174	0.363269			37.756	1.22745				49.517	1.20907			2.486	0.0607013			46.225	1.12869
			25.439	0.872522			5.111	0.1753			36.516	1.25245				29.257	0.95115			8.518	0.276922			38.551	1.2533				39.615	0.96729			5.205	0.127092			43.591	1.06437
			22.056	0.75649			19.022	0.652428			37.564	1.28839				35.716	1.16113			13.225	0.429947			37.379	1.2152				50.371	1.22992			5.578	0.1362			41.75	1.01942
			39.393	1.35113			1.256	0.0430791			33.004	1.13199				34.519	1.12222			17.763	0.577478			32.333	1.05115				40.613	0.991659			11.502	0.280847			47.23	1.15323
			29.076	0.997266			20.167	0.6917			32.442	1.11272				38.808	1.26165			3.251	0.105691			24.388	0.792858				29.173	0.712325			7.34	0.179223			44.744	1.09253
			38.934	1.33538			19.85	0.680827			24.395	0.836715				35.317	1.14816			23.262	0.756252			37.12	1.20678				33.219	0.811117			20.558	0.50197			42.095	1.02785
			25.419	0.871836			17.36	0.595424			27.598	0.946573				30.894	1.00437			6.582	0.213982			43.258	1.40632				53.845	1.31475			25.371	0.619491			32.051	0.782598
			17.729	0.60808			13.211	0.453119			37.694	1.29285				41.919	1.36279			16.979	0.55199			31.214	1.01477				52.373	1.27881			11.822	0.288661			33.781	0.82484
			29.63	1.01627			16.93	0.580675			36.194	1.2414				36.069	1.17261			16.711	0.543277			32.809	1.06663				42.629	1.04088			13.182	0.321868			53.005	1.29424
			30.223	1.03661			16.784	0.575668			27.166	0.931756				31.668	1.02953			6.714	0.218273			26.955	0.876312				46.659	1.13929			5.881	0.143598			47.439	1.15833
			27.373	0.938856			23.479	0.805297			39.498	1.35473				28.339	0.921306			5.231	0.170061			41.734	1.35678				56.161	1.3713			11.128	0.271715			52.143	1.27319
			32.201	1.10445			18.469	0.633461			32.694	1.12136				21.676	0.70469			32.631	1.06084			33.693	1.09537				55.024	1.34354			16.993	0.414923			45.643	1.11448
			27.453	0.9416			19.204	0.658671			36.671	1.25776				22.234	0.722831			4.42	0.143695			38.827	1.26227				47.546	1.16094			13.922	0.339937			39.967	0.975885
			32.357	1.1098			25.144	0.862404			40.925	1.40367				31.542	1.02544			17.399	0.565644			38.425	1.2492				47.839	1.1681			13.12	0.320355			36.355	0.88769
			37.648	1.29127			18.546	0.636102			30.756	1.05489				29.262	0.951313			21.912	0.712363			48.813	1.58692				35.18	0.859			15.185	0.370776			42.515	1.0381
			24.541	0.841722			18.271	0.62667			34.256	1.17493				32.306	1.05027			8.318	0.27042			41.139	1.33744				39.484	0.964092			16.324	0.398588			39.146	0.955838
			26.515	0.909428			19.602	0.672321			32.804	1.12513				34.699	1.12807			11.267	0.366292			31.264	1.0164				39.772	0.971124			7.552	0.184399			42.824	1.04565
			22.037	0.755838			13.219	0.453393			25.413	0.871631				33.706	1.09579			16.583	0.539116			32.476	1.0558				48.425	1.18241			14.23	0.347458			48.754	1.19044
			23.088	0.791886			20.896	0.716704			31.824	1.09152				33.378	1.08512			16.507	0.536645			44.054	1.4322				42.902	1.04755			7.055	0.172264			41.939	1.02404
			46.13	1.58219			16.429	0.563492			32.891	1.12812				36.423	1.18412			15.772	0.51275			43.446	1.41244				35.291	0.86171			11.438	0.279285			40.849	0.997421
			38.176	1.30938			21.728	0.74524			25.143	0.86237				28.316	0.920558			20.076	0.652674			27.134	0.882131				56.71	1.3847			16.68	0.40728			44.319	1.08215
			33.033	1.13299			20.375	0.698834			34.081	1.16893				31.301	1.0176			4.45	0.14467			35.923	1.16786				37.421	0.913719			19.373	0.473036			48.263	1.17845
			21.563	0.739581			16.9	0.579647			32.138	1.10229				39.941	1.29849			29.325	0.953361			49.172	1.59859				56.417	1.37755			8.236	0.201101			42.287	1.03253
			34.342	1.17788			21.378	0.733236			35.584	1.22048				31.573	1.02644			24.579	0.799068			31.466	1.02297				52.211	1.27485			21.645	0.528512			50.192	1.22555
			36.41	1.24881			29.207	1.00176			36.519	1.25255				34.396	1.11822			12.408	0.403386			32.558	1.05847				44.811	1.09416			4.609	0.112539			35.565	0.8684
			22.482	0.771101			20.995	0.720099			32.718	1.12218				26.42	0.858919			7.036	0.228742			29.464	0.95788				41.88	1.0226			5.434	0.132683			47.186	1.15215
			23.406	0.802793			13.963	0.478912			42.362	1.45296				32.437	1.05453			13.85	0.450266			49.814	1.61946				43.415	1.06008			17.955	0.438412			30.531	0.745484
			25.894	0.888128			20.207	0.693072			31.093	1.06645				37.63	1.22336			13.738	0.446625			47.734	1.55184				48.471	1.18353			6.662	0.162668			37.012	0.903732
			19.876	0.681719			16.043	0.550253			38.805	1.33096				41.471	1.34823			17.72	0.57608			38.746	1.25964				49.908	1.21862			8.599	0.209964			44.394	1.08398
			36.506	1.25211			16.872	0.578686			24.763	0.849337				34.723	1.12885			11.972	0.389212			25.784	0.838242				48.316	1.17974			9.307	0.227252			41.148	1.00472
			18.912	0.648655			17.409	0.597105			26.93	0.923662				35.225	1.14517			10.839	0.352378			37.776	1.2281				40.996	1.00101			8.807	0.215043			45.203	1.10373
			22.892	0.785164			19.181	0.657882			34.498	1.18323				28.758	0.934928			8.829	0.287032			37.229	1.21032				53.184	1.29861			8.124	0.198366			38.569	0.94175
			29.081	0.997438			15.199	0.521305			28.387	0.973635				32.776	1.06555			3.384	0.110014			34.769	1.13035				55.178	1.3473			20.228	0.493913			44.895	1.09621
			29.554	1.01366			24.822	0.85136			39.325	1.34879				35.445	1.15232			20.414	0.663663			34.557	1.12345				41.509	1.01354			11.708	0.285877			43.722	1.06757
			47.259	1.62092			28.692	0.984096			26.791	0.918894				29.757	0.967405			19.048	0.619254			28.17	0.915812				62.061	1.51536			13.53	0.330366			22.804	0.556811
			43.958	1.5077			14.398	0.493831			44.373	1.52193				31.956	1.0389			20.039	0.651471			35.569	1.15635				42.403	1.03537			18.99	0.463684			37.494	0.915501
			31.097	1.06658			15.857	0.543873			45.907	1.57455				40.064	1.30249			25.004	0.812884			37.582	1.2218				44.777	1.09333			14.25	0.347946			30.774	0.751417
			25.12	0.861581			16.59	0.569014			41.005	1.40641				32.006	1.04052			12.503	0.406475			33.664	1.09442				47.636	1.16314			24.287	0.593022			53.186	1.29866
			5.763	0.197663			18.094	0.620599			34.395	1.1797				37.812	1.22927			10.008	0.325362			36.231	1.17788				36.106	0.88161			13.178	0.321771			20.283	0.495256
			32.829	1.12599			20.838	0.714714			29.918	1.02615				34.864	1.13343			15.282	0.49682			46.413	1.50889				49.199	1.20131			12.386	0.302432			36.264	0.885468
			33.914	1.1632			21.859	0.749733			31.056	1.06518				35.469	1.1531			15.587	0.506736			42.8	1.39144				61.752	1.50782			9.255	0.225982			24.932	0.608771
			28.797	0.987697			16.591	0.569048			18.737	0.642653				31.227	1.0152			7.943	0.258228			37.487	1.21871				55.012	1.34324			18.887	0.461169			40.447	0.987605
			32.495	1.11453			6.763	0.231962			31.286	1.07307				38.689	1.25779			6.632	0.215607			30.285	0.984571				40.66	0.992806			6.163	0.150484			40.973	1.00045
			29.293	1.00471			15.931	0.546411			29.716	1.01922				35.154	1.14286			9.792	0.31834			29.649	0.963894				56.637	1.38292			6.421	0.156783			34.222	0.835608
			26.187	0.898178			1.203	0.0412612			37.206	1.27611				40.536	1.31783			22.735	0.739119			31.74	1.03187				42.782	1.04462			21.656	0.52878			30.738	0.750538
			26.44	0.906855			16.166	0.554471			29.288	1.00454				31.171	1.01337			17.627	0.573057			42.297	1.37508				47.092	1.14986			14.948	0.364989			40.122	0.97967
			23.427	0.803514			15.636	0.536293			31.148	1.06833				27.813	0.904205			17.386	0.565222			29.122	0.946761				37.295	0.910642			11.874	0.289931			34.285	0.837146
			25.227	0.865251			17.378	0.596041			32.341	1.10925				31.575	1.02651			4.591	0.149254			35.917	1.16767				46.566	1.13701			9.658	0.235822			46.898	1.14512
			33.967	1.16502			20.5	0.703122			33.757	1.15782				30.069	0.977548			9.26	0.301044			51.008	1.65828				47.647	1.16341			25.05	0.611653			24.606	0.600811
			23.188	0.795316			26.098	0.895125			34.987	1.20001				25.547	0.830537			8.817	0.286642			36.605	1.19003				39.742	0.970391			6.533	0.159518			32.39	0.790875
			33.475	1.14815			21.352	0.732344			30.216	1.03637				30.265	0.98392			21.158	0.68785			53.335	1.73393				43.89	1.07167			9.392	0.229327			30.522	0.745264
			28.501	0.977545			16.946	0.581224			41.129	1.41067				28.453	0.925012			10.879	0.353678			25.97	0.844289				45.519	1.11145			18.387	0.44896			51.56	1.25895
			31.888	1.09371			20.314	0.696742			31.431	1.07804				26.011	0.845622			7.596	0.246947			38.662	1.25691				43.569	1.06384			10.171	0.248348			34.29	0.837268
			25.47	0.873586			9.435	0.323607			30.84	1.05777				26.485	0.861032			8.549	0.277929			32.806	1.06653				43.147	1.05353			17.791	0.434408			41.395	1.01075
			25.318	0.868372			14.688	0.503778			31.979	1.09684				30.367	0.987236			8.421	0.273768			36.026	1.17121				38.233	0.933546			6.467	0.157906			37.923	0.925976
			33.095	1.13511			16.924	0.58047			22.374	0.767397				30.199	0.981775			11.901	0.386904			31.042	1.00918				42.63	1.04091			17.023	0.415655			40.51	0.989144
			25.914	0.888814			16.451	0.564246			28.305	0.970822				26.529	0.862462			9.386	0.30514			41.835	1.36006				46.297	1.13045			17.827	0.435287			36.812	0.898849
			24.807	0.850846			19.686	0.675202			40.163	1.37754				27.582	0.896696			15.711	0.510767			36.779	1.19569				47.38	1.15689			14.83	0.362108			42.313	1.03317
			29.725	1.01953			19.824	0.679936			35.703	1.22456				28.569	0.928783			20.089	0.653097			29.594	0.962106				51.378	1.25451			17.129	0.418243			35.891	0.87636
			29.88	1.02484			15.514	0.532109			34.409	1.18018				25.002	0.812819			8.789	0.285732			45.43	1.47694				38.868	0.94905			15.619	0.381373			40.73	0.994515
			21.389	0.733613			20.946	0.718419			28.436	0.975315				33.998	1.10528			13.671	0.444447			39.552	1.28584				52.225	1.27519			19.489	0.475868			37.249	0.909519
			26.76	0.917831			18.447	0.632706			30.927	1.06075				33.51	1.08942			12.297	0.399778			47.126	1.53207				40.237	0.982478			6.044	0.147578			42.981	1.04948
			33.451	1.14732			14.518	0.497947			28.834	0.988966				33.243	1.08074			7.713	0.250751			45.206	1.46965				59.233	1.44631			15.864	0.387356			50.199	1.22572
			35.576	1.22021			18.127	0.621731			33.26	1.14077				26.592	0.86451			12.818	0.416715			49.68	1.61511				44.947	1.09748			16.735	0.408623			40.098	0.979084
			26.882	0.922015			21.14	0.725073			32.05	1.09927				33.953	1.10382			25.377	0.825011			46.575	1.51416				39.517	0.964897			24.008	0.58621			46.356	1.13189
			21.768	0.746612			16.326	0.559959			34.138	1.17089				35.392	1.1506			4.871	0.158357			32.066	1.04247				45.594	1.11328			22.556	0.550756			48.124	1.17506
			40.34	1.38361			15.619	0.53571			43.217	1.48228				28.902	0.939609			8.11	0.263657			36.952	1.20132				45.34	1.10708			14.048	0.343014			60.114	1.46782
			24.667	0.846044			19.021	0.652394			34.497	1.1832				27.987	0.909862			25.437	0.826961			47.564	1.54631				38.527	0.940724			14.007	0.342013			32.346	0.789801
			25.453	0.873003			23.21	0.796071			33.066	1.13412				34.697	1.12801			20.656	0.67153			35.086	1.14065				41.874	1.02245			14.351	0.350412			28.874	0.705024
			35.898	1.23125			4.324	0.148307			34.017	1.16674				30.878	1.00385			23.897	0.776896			43.421	1.41162				56.259	1.37369			8.758	0.213846			47.621	1.16277
			34.299	1.17641			18.682	0.640767			28.372	0.97312				8.581	0.27897			20.441	0.66454			33.473	1.08821				60.689	1.48186			12.744	0.311174			47.473	1.15916
			30.1	1.03239			8.146	0.279396			27.244	0.934431				32.669	1.06207			19.524	0.634729			26.422	0.858984				31.07	0.758645			13.083	0.319451			47.271	1.15423
			38.006	1.30355			22.887	0.784992			31.984	1.09701				31.085	1.01058			6.791	0.220777			29.859	0.970721				44.24	1.08022			16.361	0.399491			51.405	1.25517
			30.474	1.04522			10.408	0.35698			29.38	1.00769				32.266	1.04897			8.248	0.268144			38.538	1.25288				23.711	0.578958			16.218	0.395999			44.4	1.08413
			39.127	1.342			18.564	0.636719			38.942	1.33566				33.314	1.08304			3.771	0.122596			53.236	1.73071				39.442	0.963066			13.587	0.331757			38.895	0.94971
			26.865	0.921432			24.611	0.844123			31.625	1.08469				36.231	1.17788			16.026	0.521008			36.279	1.17944				40.524	0.989485			16.627	0.405986			38.602	0.942555
			24.18	0.82934			13.307	0.456412			29.497	1.01171				30.811	1.00167			20.83	0.677187			29.861	0.970786				51.399	1.25502			10.938	0.267076			52.315	1.27739
			46.487	1.59444			14.951	0.512799			22.418	0.768906				28.263	0.918835			7.188	0.233683			40.945	1.33113				41.824	1.02123			3.889	0.0949588			59.776	1.45957
			27.24	0.934294			25.482	0.873997			35.594	1.22082				27.712	0.900922			22.488	0.731089			33.485	1.0886				37.52	0.916136			10.701	0.261289			43.487	1.06183
			22.129	0.758994			14.388	0.493488			25.385	0.87067				28.511	0.926897			18.764	0.610021			27.038	0.87901				44.989	1.09851			8.557	0.208939			33.322	0.813632
			25.776	0.884081			13.998	0.480112			29.996	1.02882				19.124	0.621725			4.409	0.143337			32.106	1.04377				34.425	0.840565			8.486	0.207205			43.828	1.07016
			28.802	0.987869			31.625	1.08469			27.822	0.954256				23.882	0.776408			5.866	0.190705			45.246	1.47096				35.957	0.877972			3.96	0.0966924			43.637	1.0655
			26.736	0.917008			17.79	0.610172			35.343	1.21222				25.77	0.837787			10.032	0.326142			36.529	1.18756				43.479	1.06164			8.476	0.206961			46.002	1.12324
			27.672	0.949111			16.785	0.575702			45.557	1.56254				28.79	0.935968			20.019	0.650821			41.217	1.33997				41.835	1.0215			26.172	0.639049			49.24	1.20231
			35.92	1.23201			20.381	0.69904			32.797	1.12489				26.621	0.865453			14.3	0.464895			35.909	1.16741				57.546	1.40512			26.9	0.656825			41.184	1.0056
			33.724	1.15669			3.115	0.10684			27.005	0.926234				33.165	1.0782			9.841	0.319933			25.883	0.841461				40.772	0.995541			7.559	0.18457			46.499	1.13538
			21.929	0.752134			25.472	0.873654			36.527	1.25283				37.228	1.21029			9.115	0.29633			32.39	1.053				42.212	1.0307			15.718	0.383791			47.206	1.15264
			34.901	1.19706			20.832	0.714509			39.582	1.35761				26.664	0.866851			4.979	0.161868			39.72	1.2913				53.212	1.29929			17.049	0.41629			28.624	0.69892
			26.15	0.896909			14.919	0.511701			26.807	0.919443				32.837	1.06754			8.874	0.288495			3.147	0.10231				39.713	0.969683			4.078	0.0995736			54.378	1.32776
			28.884	0.990681			8.882	0.30464			28.97	0.993631				31.163	1.01311			12.866	0.418276			26.74	0.869322				57.323	1.39967			9.709	0.237067			40.376	0.985872
			26.245	0.900167			19.826	0.680004			32.551	1.11645				31.02	1.00847			18.436	0.599358			37.076	1.20535				44.081	1.07634			9.781	0.238825			52.135	1.27299
			27.821	0.954222			11.033	0.378417			26.419	0.906135				31.934	1.03818			2.727	0.0886552			28.317	0.920591				42.579	1.03966			24.496	0.598125			51.53	1.25822
			34.182	1.1724			14.929	0.512044			34.104	1.16972				26.431	0.859276			8.514	0.276792			42.286	1.37473				58.384	1.42558			10.393	0.253769			56.34	1.37567
			26.35	0.903768			16.795	0.576045			23.015	0.789383				30.546	0.993056			19.668	0.63941			51.645	1.67899				31.823	0.777031			16.338	0.398929			28.602	0.698383
			24.101	0.826631			10.567	0.362433			39.608	1.3585				31.954	1.03883			9.054	0.294347			28.194	0.916592				59.316	1.44833			6.3	0.153829			36.476	0.890644
			31.417	1.07756			11.308	0.387849			24.601	0.84378				31.041	1.00915			14.3	0.464895			23.337	0.75869				43.299	1.05724			21.92	0.535227			47.531	1.16058
			30.414	1.04316			14.732	0.505287			41.561	1.42548				33.862	1.10086			9.886	0.321396			43.164	1.40327				32.785	0.80052			4.088	0.0998178			32.996	0.805672
[truncated: 1,893 more rows]

## Sheet: F5S1K
NANOG level analysis of hESCs cultured in YSLC conditioned medium in 2D in the presence of WNT3a
units= fluorescence intensity (a.u.)
[truncated: 1,447 more rows]
