# Supplementary material for: An in vitro stem cell model of human epiblast and yolk sac interaction
Source: eLife. 2021 Aug 17;10:e63930. doi: 10.7554/eLife.63930 (PMC8370770; doi:10.7554/eLife.63930)
Supplement: Figure 5—source data 1. [file elife-63930-fig5-data1.xlsx]

## Sheet: F5A
Bar chart of BMP and WNT inhibitor levels in the pre- and post-implantation human hypoblast from published sc-RNAseq data
Units= RCPM
	Gene	Pre-implantation	Pot-implantation
	DKK1	0	4.56774
	CER1	34.0164	174.454
	NOG	41.5597	15.5805
	LEFTY1	237.055	223.755
	LEFTY2	156.52	622.526
	SFRP1	25.8774	69.421
	DKK3	18.5483	13.0717

## Sheet: F5B
Bar chart of BMP and WNT inhibitor levels in Rset hPSCs and YSLCs using bulk RNAseq datasets (published for Rset hPSCs and novel for YSLC)
Units= TPM
		Rset hPSCs				YSLC
		Gene	Mean	Standard Deviation	No. of samples	Mean	Standard Deviation	No. of samples
	DKK1	DKK1	0.5435	0.1793	2	172.1	64.97	3
	CER1	CER1	41.46	44.87	2	1772	1623	3
	NOG	NOG	0.7358	0.4306	2	611.6	504.7	3
	LEFTY1	LEFTY1	69.43	57.67	2	116.9	149.5	3
	LEFTY2	LEFTY2	203.1	212.7	2	244.1	112	3
	SFRP1	SFRP1	99.75	41.29	2	247.1	304	3
	DKK3	DKK3	2.722	0.7778	2	5.391	2.889	3

## Sheet: F5D
Morphology analysis of hESCs cultured in YSLC conditioned medium in 3D
Disorganised= no lumen present, squamous= average sturcture aspect ratio </= 1, columnar= average aspect ratio of the sturcture >1																																																EXP1	Control (10)
	Control							Control							Control									YSLC Conditioned Medium								YSLC Conditioned Medium
																																																Disorganised	10
	Exp 1 (n=10)							Exp 2 (n=11)							Exp 3 (n=12)									Exp 1 (n=10)								Exp 2 (n=10)							Exp 3 (n=10)									Organised (mainly squamous cells)	0
	Sturcture number	Cell measurement	ROI length (a.u.)	Aspect ratio (heigh/width) (a.u.)	Average aspect ratio of four random cells wthin the sturctre (a.u)	Type of sturcture		Sturcture number	Cell measurement	ROI length (a.u.)	Aspect ratio (heigh/width) (a.u.)	Average aspect ratio of four random cells wthin the sturctre (a.u)	Type of sturcture		Sturcture number	Cell measurement	ROI length (a.u.)	Aspect ratio (heigh/width) (a.u.)	Average aspect ratio of four random cells wthin the sturctre (a.u)	Type of sturcture				Sturcture number	Cell measurement	ROI length (a.u.)	Aspect ratio (heigh/width) (a.u.)	Average aspect ratio of four random cells wthin the sturctre (a.u)	Type of sturcture			Sturcture number	Cell measurement	ROI length (a.u.)	Aspect ratio (heigh/width) (a.u.)	Average aspect ratio of four random cells wthin the sturctre (a.u)	Type of sturcture		Sturcture number	Cell measurement	ROI length (a.u.)	Aspect ratio (heigh/width) (a.u.)	Average aspect ratio of four random cells wthin the sturctre (a.u)	Type of sturcture				Organised (mainly columnar cells)	0
	1	Height (h)	N/A	N/A	N/A	Disorganised		1	Height (h)	11.03	0.579885	0.660962	Squamous		1	Height (h)	16.97	1.34618	0.770136	Squamous				1	Height (h)	23.966	1.12802	1.35102	Columnar			1	Height (h)	15.758	1.23884	2.65688	Columnar		1	Height (h)	27.511	2.72737	2.86449	Columnar					10
		Width (w)	N/A	N/A	N/A				Width (w)	19.021						Width (w)	12.606								Width (w)	21.246							Width (w)	12.72						Width (w)	10.087
		h	N/A	N/A	N/A				h	12.604	0.688179					h	7.735	0.568959							h	16.886	0.763623						h	17.26	3.56023					h	26.874	2.45874
		w	N/A	N/A	N/A				w	18.315						w	13.595								w	22.113							w	4.848						w	10.93							EXP2	Control (11)
		h	N/A	N/A	N/A				h	16.611	0.819244					h	9.077	0.621798							h	16.831	2.08847						h	20.239	3.3941					h	27.828	2.53443
		w	N/A	N/A	N/A				w	20.276						w	14.598								w	8.059							w	5.963						w	10.98							Disorganised	5
		h	N/A	N/A	N/A				h	12.339	0.556538					h	9.282	0.543602							h	21.103	1.42395						h	27.153	2.43437					h	33.465	3.73744						Organised (mainly squamous cells)	3
		w	N/A	N/A	N/A				w	22.171						w	17.075								w	14.82			Columnar				w	11.154						w	8.954							Organised (mainly columnar cells)	3
	2	h	N/A	N/A	N/A	Disorganised		2	h	18.245	1.33039	1.03878	Squamous		2	h	6.942	0.475936	0.715629	Squamous				2	h	18.991	1.62915	2.17588				2	h	17.041	1.70036	2.06779	Columnar		2	h	17.41	0.954129	2.02109	Columnar					11
		w	N/A	N/A	N/A				w	13.714						w	14.586								w	11.657							w	10.022						w	18.247
		h	N/A	N/A	N/A				h	15.458	0.995428					h	11.928	0.81721							h	27.863	3.37447						h	20.319	2.32456					h	20.874	1.55197
		w	N/A	N/A	N/A				w	15.529						w	14.596								w	8.257							w	8.741						w	13.45							EXP3	Control (12)
		h	N/A	N/A	N/A				h	12.615	0.67808					h	14.434	0.773195							h	22.547	2.01187						h	23.758	2.17724					h	29.669	3.54003
		w	N/A	N/A	N/A				w	18.604						w	18.668								w	11.207							w	10.912						w	8.381							Disorganised	5
		h	N/A	N/A	N/A				h	16.063	1.15122					h	10.41	0.796176							h	27.243	1.68802						h	18.828	2.06901					h	26.558	2.03822						Organised (mainly squamous cells)	7
		w	N/A	N/A	N/A				w	13.953						w	13.075								w	16.139							w	9.1						w	13.03							Organised (mainly columnar cells)	0
	3	h	N/A	N/A	N/A	Disorganised		3	h	19.493	2.21814	2.26136	Columanr		3	h	10.667	0.698422	1.0007	Squamous				3	h	28.596	2.26683	1.92091	Columnar			3	h	23.917	4.10381	3.7564	Columnar		3	h	24.033	1.30557	1.87784	Columnar					12
		w	N/A	N/A	N/A				w	8.788						w	15.273								w	12.615							w	5.828						w	18.408
		h	N/A	N/A	N/A				h	11.212	0.973686					h	9.225	0.50095							h	23.545	1.72314						h	24.582	5.69555					h	17.835	1.10345
		w	N/A	N/A	N/A				w	11.515						w	18.415								w	13.664							w	4.316						w	16.163							Total:	Control (33)
		h	N/A	N/A	N/A				h	24.487	3.59574					h	16.699	2.15166							h	28.566	1.6889						h	24.842	2.62406					h	25.268	2.42635
		w	N/A	N/A	N/A				w	6.81						w	7.761								w	16.914							w	9.467						w	10.414							Disorganised	20
		h	N/A	N/A	N/A				h	27.239	2.25787					h	12.931	0.651764							h	31.515	2.00477						h	20.539	2.60218					h	25.462	2.67599						Organised (mainly squamous cells)	10
		w	N/A	N/A	N/A				w	12.064						w	19.84								w	15.72							w	7.893						w	9.515							Organised (mainly columnar cells)	3
	4	h	N/A	N/A	N/A	Disorganised		4	h	20.539	2.58971	1.72075	Columnar		4	h	15.395	1.57542	0.719066	Squamous				4	h	24.503	2.80323	2.35341	Columnar			4	h	18.673	2.02703	1.9601	Columnar		4	h	16.735	0.967509	2.02942	Columnar					33
		w	N/A	N/A	N/A				w	7.931						w	9.772								w	8.741							w	9.212						w	17.297
		h	N/A	N/A	N/A				h	16.801	1.53476					h	9.904	0.370839							h	25.649	2.85846						h	18.462	1.19325					h	27.315	3.59408
		w	N/A	N/A	N/A				w	10.947						w	26.707								w	8.973							w	15.472						w	7.6
		h	N/A	N/A	N/A				h	23.667	2.07478					h	8.073	0.511403							h	25.518	1.78798						h	20.776	2.84876					h	20.467	1.56775
		w	N/A	N/A	N/A				w	11.407						w	15.786								w	14.272							w	7.293						w	13.055
		h	N/A	N/A	N/A				h	13.62	0.683769					h	11.702	0.418601							h	24.579	1.96396						h	22.535	1.77134					h	16.223	1.98836
		w	N/A	N/A	N/A				w	19.919						w	27.955								w	12.515							w	12.722						w	8.159
	5	h	N/A	N/A	N/A	Disorganised		5	h	15.683	1.03056	0.851096	Squamous		5	h	11.657	1.00483	0.726762	Squamous				5	h	25.224	2.81204	1.84761	Columnar			5	h	18.174	1.10139	1.86287	Columnar		5	h	19.732	1.12651	1.87617	Columnar
		w	N/A	N/A	N/A				w	15.218						w	11.601								w	8.97							w	16.501						w	17.516
		h	N/A	N/A	N/A				h	15.344	0.693357					h	11.558	1.0135							h	25.407	1.99992						h	17.693	2.0894					h	21.318	1.3675
		w	N/A	N/A	N/A				w	22.13						w	11.404								w	12.704							w	8.468						w	15.589
		h	N/A	N/A	N/A				h	11.697	0.469967					h	8.131	0.497948							h	21.428	1.46787						h	18.349	2.17328					h	20.231	1.85384
		w	N/A	N/A	N/A				w	24.889						w	16.329								w	14.598							w	8.443						w	10.913
		h	N/A	N/A	N/A				h	18.275	1.21051					h	10.115	0.390767							h	15.432	1.11062						h	18.169	2.08743					h	27.742	3.1568
		w	N/A	N/A	N/A				w	15.097						w	25.885								w	13.895							w	8.704						w	8.788
	6	h	N/A	N/A	N/A	Disorganised		6	h	10.467	0.865184	1.35613	Columnar		6	h	7.08	0.339666	0.95386	Squamous				6	h	15.623	0.879822	0.995549	Squamous			6	h	12.143	0.830575	2.10553	Columnar		6	h	17.275	1.36788	1.7192	Columnar
		w	N/A	N/A	N/A				w	12.098						w	20.844								w	17.757							w	14.62						w	12.629
		h	N/A	N/A	N/A				h	14.447	1.35716					h	6.762	0.438578							h	17.089	0.776314						h	22.754	1.89981					h	16.478	1.33913
		w	N/A	N/A	N/A				w	10.645						w	15.418								w	22.013							w	11.977						w	12.305
		h	N/A	N/A	N/A				h	29.333	2.73578					h	19.79	2.48868							h	12.627	0.800494						h	22.66	2.42146					h	18.182	1.74592
		w	N/A	N/A	N/A				w	10.722						w	7.952								w	15.774							w	9.358						w	10.414
		h	N/A	N/A	N/A				h	10.294	0.466404					h	7.389	0.548512							h	16.56	1.52556						h	23.546	3.27028					h	21.301	2.42387
		w	N/A	N/A	N/A				w	22.071						w	13.471								w	10.855							w	7.2						w	8.788
	7	h	N/A	N/A	N/A	Disorganised		7		N/A	N/A	N/A	Disorganised		7	h	7.515	0.357551	0.565265	Squamous				7	h	22.349	2.34242	1.86016	Columnar			7	h	23.278	4.00103	2.91467	Columnar		7	h	21.643	1.12227	1.47372	Columnar
		w	N/A	N/A	N/A					N/A	N/A	N/A				w	21.018								w	9.541							w	5.818						w	19.285
		h	N/A	N/A	N/A					N/A	N/A	N/A				h	9.367	0.650351							h	12.599	0.68328						h	24.514	2.10294					h	16.366	1.19748
		w	N/A	N/A	N/A					N/A	N/A	N/A				w	14.403								w	18.439							w	11.657						w	13.667
		h	N/A	N/A	N/A					N/A	N/A	N/A				h	6.617	0.526286							h	19.827	2.5547						h	23.802	2.88789					h	13.378	1.5142
		w	N/A	N/A	N/A					N/A	N/A	N/A				w	12.573								w	7.761							w	8.242						w	8.835
		h	N/A	N/A	N/A					N/A	N/A	N/A				h	8.069	0.726871							h	21.538	1.86025						h	19.545	2.6668					h	23.175	2.06092
		w	N/A	N/A	N/A					N/A	N/A	N/A				w	11.101								w	11.578							w	7.329						w	11.245
	8	h	N/A	N/A	N/A	Disorganised		8		N/A	N/A	N/A	Disorganised		8		N/A	N/A	N/A	Disorganised				8	h	21.263	2.14951	2.40291	Columnar			8	h	28.172	3.60026	2.53235	Columnar		8	h	13.034	1.46252	1.39638	Columnar
		w	N/A	N/A	N/A					N/A	N/A	N/A					N/A	N/A	N/A						w	9.892							w	7.825						w	8.912
		h	N/A	N/A	N/A					N/A	N/A	N/A					N/A	N/A	N/A						h	21.412	2.56462						h	16.255	1.61822					h	18.245	1.70291
		w	N/A	N/A	N/A					N/A	N/A	N/A					N/A	N/A	N/A						w	8.349							w	10.045						w	10.714
		h	N/A	N/A	N/A					N/A	N/A	N/A					N/A	N/A	N/A						h	22.601	2.79958						h	26.379	2.92807					h	16.061	0.980824
		w	N/A	N/A	N/A					N/A	N/A	N/A					N/A	N/A	N/A						w	8.073							w	9.009						w	16.375
		h	N/A	N/A	N/A					N/A	N/A	N/A					N/A	N/A	N/A						h	24.77	2.09791						h	24.746	1.98285					h	17.254	1.43927
		w	N/A	N/A	N/A					N/A	N/A	N/A					N/A	N/A	N/A						w	11.807							w	12.48						w	11.988
	9	h	N/A	N/A	N/A	Disorganised		9		N/A	N/A	N/A	Disorganised		9		N/A	N/A	N/A	Disorganised				9	h	20.22	1.60846	1.29931	Columnar			9	h	23.95	2.78748	1.98078	Columnar		9	h	25.382	2.18754	2.11072	Columnar
		w	N/A	N/A	N/A					N/A	N/A	N/A					N/A	N/A	N/A						w	12.571							w	8.592						w	11.603
		h	N/A	N/A	N/A					N/A	N/A	N/A					N/A	N/A	N/A						h	18.222	1.10685						h	21.285	1.38466					h	18.225	1.30617
		w	N/A	N/A	N/A					N/A	N/A	N/A					N/A	N/A	N/A						w	16.463							w	15.372						w	13.953
		h	N/A	N/A	N/A					N/A	N/A	N/A					N/A	N/A	N/A						h	16.992	1.17001						h	23.113	2.21963					h	25.142	2.24984
		w	N/A	N/A	N/A					N/A	N/A	N/A					N/A	N/A	N/A						w	14.523							w	10.413						w	11.175
		h	N/A	N/A	N/A					N/A	N/A	N/A					N/A	N/A	N/A						h	20.057	1.31194						h	22.327	1.53134					h	27.239	2.69934
		w	N/A	N/A	N/A					N/A	N/A	N/A					N/A	N/A	N/A						w	15.288							w	14.58						w	10.091
	10	h	N/A	N/A	N/A	Disorganised		10		N/A	N/A	N/A	Disorganised		10		N/A	N/A	N/A	Disorganised				10	h	15.613	1.24199	1.13801	Columnar			10	h	N/A	N/A	N/A	Disorganised		10	h	N/A	N/A	N/A	Disorganised
		w	N/A	N/A	N/A					N/A	N/A	N/A					N/A	N/A	N/A						w	12.571							w	N/A	N/A	N/A				w	N/A	N/A	N/A
		h	N/A	N/A	N/A					N/A	N/A	N/A					N/A	N/A	N/A						h	17.075	1.71333						h	N/A	N/A	N/A				h	N/A	N/A	N/A
		w	N/A	N/A	N/A					N/A	N/A	N/A					N/A	N/A	N/A						w	9.966							w	N/A	N/A	N/A				w	N/A	N/A	N/A
		h	N/A	N/A	N/A					N/A	N/A	N/A					N/A	N/A	N/A						h	10.413	0.460386						h	N/A	N/A	N/A				h	N/A	N/A	N/A
		w	N/A	N/A	N/A					N/A	N/A	N/A					N/A	N/A	N/A						w	22.618							w	N/A	N/A	N/A				w	N/A	N/A	N/A
		h	N/A	N/A	N/A					N/A	N/A	N/A					N/A	N/A	N/A						h	12.711	1.13633						h	N/A	N/A	N/A				h	N/A	N/A	N/A
		w	N/A	N/A	N/A					N/A	N/A	N/A					N/A	N/A	N/A						w	11.186							w	N/A	N/A	N/A				w	N/A	N/A	N/A
								11		N/A	N/A	N/A	Disorganised		11		N/A	N/A	N/A	Disorganised
																	N/A	N/A	N/A
																	N/A	N/A	N/A
																	N/A	N/A	N/A
																	N/A	N/A	N/A
																	N/A	N/A	N/A
																	N/A	N/A	N/A
																	N/A	N/A	N/A
															12		N/A	N/A	N/A	Disorganised
																							0.132			0	0	NaN						21.687
																							0.225			0	0	NaN						12.945
																							0.124			0	0	NaN						23.177
																							0.281			0	0	NaN						10.303
																							0.128			0	0	NaN						22.524
																							0.235			0	0	NaN						12.424
																							0.107			0	0	NaN						27.002
																							0.3			0	0	NaN						9.758
																							0.133			0	0	NaN						21.609
																							0.154			0	0	NaN						18.732
																							0.151			0	0	NaN						19.137
																							0.193			0	0	NaN						14.999
																							0.104			0	0	NaN						27.642
																							0.21			0	0	NaN						13.72
																							0.111			0	0	NaN						26.048
																							0.241			0	0	NaN						12.182
																							0.11			0	0	NaN						26.182
																							0.457			0	0	NaN						6.527
																							0.119			0	0	NaN						24.261
																							0.169			0	0	NaN						17.102
																							0.126			0	0	NaN						22.904
																							0.266			0	0	NaN						10.93
																							0.116			0	0	NaN						24.65
																							0.244			0	0	NaN						11.884
																							0.11			0	0	NaN						26.124
																							0.242			0	0	NaN						12.045
																							0.103			0	0	NaN						28.077
																							0.275			0	0	NaN						10.641
																							0.118			0	0	NaN						24.425
																							0.335			0	0	NaN						8.809
																							0.139			0	0	NaN						20.839
																							0.236			0	0	NaN						12.305
																							0.09			0	0	NaN						31.897
																							0.494			0	0	NaN						6.068
																							0.092			0	0	NaN						31.308
																							0.244			0	0	NaN						11.988
																							0.077			0	0	NaN						37.156
																							0.353			0	0	NaN						8.243
																							0.112			0	0	NaN						25.559
																							0.336			0	0	NaN						8.788
																							0.106			0	0	NaN						27.22
																							0.253			0	0	NaN						11.435
																							0.102			0	0	NaN						28.252
																							0.179			0	0	NaN						16.155
																							0.09			0	0	NaN						31.82
																							0.281			0	0	NaN						10.303
																							0.098			0	0	NaN						29.4
																							0.258			0	0	NaN						11.322
																							0.103			0	0	NaN						27.999
																							0.281			0	0	NaN						10.303
																							0.117			0	0	NaN						24.544
																							0.321			0	0	NaN						9.216
																							0.11			0	0	NaN						26.126
																							0.327			0	0	NaN						8.912
																							0.099			0	0	NaN						29.061
																							0.229			0	0	NaN						12.611
																							0.162			0	0	NaN						17.889
																							0.32			0	0	NaN						9.236
																							0.171			0	0	NaN						16.994
																							0.173			0	0	NaN						16.667
																							0.154			0	0	NaN						18.827
																							0.453			0	0	NaN						6.556
																							0.114			0	0	NaN						25.223
																							0.168			0	0	NaN						17.23
[truncated: 7 more columns]

## Sheet: F5E
SOX2 level analysis of hESCs cultured in YSLC conditioned medium in 3D
units= fluorescence intensity (a.u.)
		Exp 1	15.9427	1			39.0462	2.44916			Exp 2	15.2074	1			35.0889	2.30736			Exp 3	33.7024	1			129.067	3.8296
		Control	SOX2	rel SOX2		+ YSLC CM	SOX2	rel SOX2			Control	SOX2	rel SOX2		+ YSLC CM	SOX2	rel SOX2			Control	SOX2	rel SOX2		+ YSLC CM	SOX2	rel SOX2				SOX2
			13.304	0.834487			13.574	0.851423				23.243	1.5284			11.296	0.742798				51.534	1.52909			106.687	3.16556				hESCs	+YSLC CM
			10.986	0.689092			92.519	5.80321				16.552	1.08842			36.807	2.42034				17.362	0.515156			188.662	5.59788			Number of values	2346	596
			10.135	0.635713			89.968	5.6432				26.586	1.74823			23.526	1.54701				14.924	0.442817			110.707	3.28484
			7.259	0.455318			34.59	2.16964				6.01	0.395203			15.427	1.01444				25.188	0.747366			150.712	4.47185			Minimum	0.05488	0.3177
			15.989	1.0029			39.09	2.4519				15.614	1.02674			17.433	1.14635				20.6	0.611233			20.307	0.602539			25% Percentile	0.7382	1.242
			13.368	0.838502			139.128	8.72674				17.37	1.14221			9.383	0.617004				40.601	1.20469			57.188	1.69685			Median	0.9756	2.418
			16.62	1.04248			153.303	9.61586				13.868	0.911927			9.379	0.616741				28.655	0.850237			81.091	2.40609			75% Percentile	1.236	3.725
			15.061	0.944694			109.038	6.83936				9.184	0.603918			25.207	1.65755				24.488	0.726596			94.683	2.80939			Maximum	3.103	9.616
			10.339	0.648509			22.731	1.42579				22.566	1.48389			23.615	1.55287				70.585	2.09436			106.592	3.16274
			15.916	0.998324			24.234	1.52007				19.016	1.25045			31.933	2.09984				15.489	0.459582			175.027	5.19331			Mean	1	2.684
			17.96	1.12653			14.976	0.939363				13.67	0.898907			28.714	1.88816				43.202	1.28187			89.538	2.65673			Std. Deviation	0.3859	1.636
			11.965	0.750499			24.216	1.51894				16.881	1.11005			16.597	1.09138				53.726	1.59413			110.508	3.27894			Std. Error of Mean	0.007968	0.06702
			22.591	1.41701			32.277	2.02456				14.684	0.965585			27.882	1.83345				15.034	0.446081			101.578	3.01397
			13.748	0.862337			17.124	1.0741				9.167	0.6028			8.932	0.587347				25.634	0.760599			126.772	3.76151			Lower 95% CI of mean	0.9844	2.552
			13.682	0.858197			12.939	0.811593				19.972	1.31331			31.69	2.08386				51.391	1.52485			81.751	2.42567			Upper 95% CI of mean	1.016	2.815
			17.283	1.08407			14.421	0.904551				13.799	0.90739			15.114	0.993861				35.099	1.04144			254.397	7.54834
			13.942	0.874506			14.249	0.893762				13.361	0.878588			16.174	1.06356				41.914	1.24365			106.481	3.15945			Sum	2346	1599
			11.618	0.728734			20.387	1.27877				11.815	0.776926			9.547	0.627788				28.146	0.835134			158.59	4.7056
			15.925	0.998889			20.958	1.31458				14.472	0.951644			16.117	1.05982				34.511	1.02399			132.709	3.93767			D'Agostino & Pearson normality test
			17.07	1.07071			20.333	1.27538				13.923	0.915544			14.79	0.972555				61.309	1.81913			90.632	2.68919			K2	137.7	56.1
			22.135	1.38841			18.197	1.1414				11.691	0.768772			13.843	0.910283				29.148	0.864865			66.988	1.98763			P value	<0.0001	<0.0001
			8.039	0.504243			14.528	0.911262				17.365	1.14188			30.864	2.02954				19.744	0.585834			166.119	4.929			Passed normality test (alpha=0.05)?	No	No
			13.519	0.847973			24.428	1.53224				11.832	0.778044			12.097	0.79547				18.657	0.553581			127.411	3.78047			P value summary	****	****
			20.341	1.27588			17.69	1.1096				19.355	1.27274			13.651	0.897657				34.708	1.02984			52.353	1.55339
			14.853	0.931648			27.497	1.72474				15.557	1.02299			27.034	1.77769				33.476	0.993283			88.494	2.62575
			9.324	0.584844			18.516	1.16141				17.876	1.17548			17.398	1.14405				37.707	1.11882			101.284	3.00525
			15.243	0.95611			23.896	1.49887				17.001	1.11795			12.716	0.836174				27.712	0.822256			142.604	4.23127			Column B	+ YSLC CM
			8.475	0.531591			16.509	1.03552				19.808	1.30253			11.195	0.736157				38.025	1.12826			145.122	4.30599			vs.	vs.
			16.044	1.00635			20.937	1.31326				15.606	1.02621			19.37	1.27373				47.74	1.41652			90.626	2.68901			Column A	hESC
			13.673	0.857633			10.697	0.670965				17.117	1.12557			18.719	1.23092				16.469	0.48866			152.469	4.52398
			16.805	1.05409			17.409	1.09197				15.304	1.00635			27.818	1.82925				18.288	0.542632			167.046	4.9565			Mann Whitney test
			22.307	1.3992			15.909	0.997885				19.087	1.25512			35.217	2.31579				25.802	0.765584			138.378	4.10588			P value	<0.0001
			26.307	1.65009			67.229	4.21691				22.433	1.47514			19.15	1.25926				52.239	1.55001			160.114	4.75082			Exact or approximate P value?	Approximate
			16.567	1.03916			21.918	1.3748				15.404	1.01293			86.061	5.65917				44.708	1.32655			57.045	1.69261			P value summary	****
			15.808	0.99155			32.67	2.04921				14.678	0.965191			43.745	2.87657				34.163	1.01367			48.827	1.44877			Significantly different (P < 0.05)?	Yes
			19.967	1.25242			10.594	0.664504				16.056	1.0558			28.85	1.89711				40.263	1.19466			126.397	3.75039			One- or two-tailed P value?	Two-tailed
			11.642	0.730239			19.898	1.24809				12.671	0.833215			12.464	0.819603				33.232	0.986043			191.221	5.67381			Sum of ranks in column A,B	2974855 , 1354298
			16.441	1.03125			32.406	2.03265				14.534	0.955721			64.768	4.25899				26.541	0.787511			226.267	6.71368			Mann-Whitney U	221824
			25.33	1.58881			55.796	3.49978				22.091	1.45265			53.447	3.51455				45.893	1.36171			248.335	7.36847
			20.669	1.29645			34.808	2.18332				13.303	0.874774			61.956	4.07408				45.341	1.34534			95.048	2.82022			Difference between medians
			17.324	1.08664			41.375	2.59523				16.693	1.09769			28.451	1.87087				28.992	0.860236			131.217	3.8934			Median of column A	0.9756, n=2346
			24.523	1.53819			18.006	1.12942				15.837	1.0414			63.365	4.16673				22.293	0.661467			162.518	4.82215			Median of column B	2.418, n=596
			7.814	0.49013			21.99	1.37931				12.649	0.831768			56.679	3.72708				22.391	0.664374			74.699	2.21643			Difference: Actual	1.443
			18.309	1.14842			25.471	1.59766				12.629	0.830453			13.195	0.867672				34.06	1.01061			227.393	6.74709			Difference: Hodges-Lehmann	1.432
			15.918	0.998449			43.63	2.73667				15.647	1.02891			52.168	3.43044				11.116	0.329828			90.282	2.6788
			10.713	0.671968			29.37	1.84222				12.124	0.797246			73.2	4.81346				48.138	1.42833			91.246	2.70741
			23.933	1.50119			38.52	2.41615				20.157	1.32548			6.925	0.455372				53.872	1.59846			188.68	5.59842
			15.727	0.986469			25.473	1.59778				14.878	0.978342			69.456	4.56726				20.22	0.599958			131.554	3.9034
			16.356	1.02592			21.765	1.3652				20.212	1.32909			13.304	0.87484				42.028	1.24703			108.237	3.21155
			19.149	1.20111			15.982	1.00246				14.532	0.95559			98.776	6.49528				33.619	0.997526			50.415	1.49589
			18.685	1.17201			49.424	3.1001				18.93	1.24479			44.596	2.93253				32.552	0.965866			196.156	5.82024
			9.976	0.62574			23.815	1.49379				20.86	1.3717			89.153	5.86249				46.212	1.37118			50.203	1.4896
			26.102	1.63724			49.361	3.09615				23.223	1.52709			43.149	2.83738				52.542	1.559			170.627	5.06276
			22.066	1.38408			18.1	1.13531				9.803	0.644622			69.64	4.57936				41.184	1.22199			183.12	5.43344
			35.864	2.24955			43.098	2.7033				9.675	0.636205			29.318	1.92788				31.832	0.944503			82.983	2.46223
			18.181	1.1404			37.46	2.34966				21.085	1.3865			33.065	2.17428				40.554	1.2033			51.714	1.53443
			20.514	1.28673			47.827	2.99993				17.512	1.15155			15.165	0.997214				31.768	0.942604			117.601	3.4894
			20.527	1.28755			11.406	0.715436				13.585	0.893317			17.948	1.18022				23.151	0.686925			207.075	6.14422
			15.969	1.00165			12.779	0.801557				14.009	0.921199			71.997	4.73435				19.12	0.567319			165.403	4.90775
			21.034	1.31935			13.604	0.853305				12.162	0.799744			48.066	3.16071				50.941	1.5115			60.306	1.78937
			18.868	1.18349			12.13	0.760849				10.193	0.670268			51.746	3.40269				42.361	1.25691			49.486	1.46832
			21.25	1.3329			7.459	0.467862				18.288	1.20258			77.609	5.10338				61.055	1.81159			116.207	3.44804
			30.802	1.93204			18.279	1.14654				16.339	1.07441			61	4.01122				24.962	0.74066			194.315	5.76562
			18.287	1.14704			20.148	1.26377				18.285	1.20238			79.797	5.24726				22.759	0.675294			112.691	3.34371
			12.933	0.811217			16.919	1.06124				14.404	0.947173			52.838	3.4745				38.111	1.13081			249.701	7.409
			21.402	1.34243			14.703	0.922239				15.106	0.993335			70.143	4.61244				43.633	1.29466			95.839	2.84369
			21.6	1.35485			14.971	0.939049				16.804	1.10499			78.804	5.18196				21.176	0.628324			131.416	3.89931
			11.437	0.717381			21.853	1.37072				15.611	1.02654			68.866	4.52847				49.773	1.47684			172.417	5.11587
			21.723	1.36257			13.068	0.819684				18.086	1.18929			28.714	1.88816				35.492	1.0531			77.195	2.29049
			20.164	1.26478			45.261	2.83898				21.288	1.39985			20.029	1.31706				37.079	1.10019			229.036	6.79584
			14.343	0.899658			21.186	1.32888				16.841	1.10742			21.232	1.39617				50.974	1.51247			88.993	2.64056
			21.908	1.37417			64.786	4.06367				19.144	1.25886			71.895	4.72764				58.699	1.74169			174.174	5.168
			17.523	1.09912			22.217	1.39355				13.609	0.894896			61.528	4.04594				25.013	0.742173			120.318	3.57001
			22.306	1.39913			15.298	0.95956				19.258	1.26636			57.899	3.8073				7.175	0.212893			149.451	4.43443
			18.459	1.15783			34.135	2.1411				18.292	1.20284			47.665	3.13434				33.936	1.00693			185.412	5.50145
			16.613	1.04204			34.887	2.18827				13.085	0.860439			36.289	2.38628				19.912	0.590819			179.532	5.32698
			22.857	1.4337			24.597	1.54284				18.261	1.2008			27.481	1.80709				43.637	1.29477			70.54	2.09303
			27.734	1.7396			16.217	1.0172				15.703	1.03259			62.199	4.09006				35.768	1.06129			183.005	5.43003
			24.312	1.52496			49.642	3.11377				16.916	1.11236			49.589	3.26086				54.633	1.62104			159.231	4.72462
			12.922	0.810527			16.005	1.00391				21.133	1.38966			24	1.57818				40.285	1.19532			187.899	5.57524
			22.955	1.43984			8.612	0.540184				20.905	1.37466			61.107	4.01825				40.572	1.20383			71.169	2.11169
			22.29	1.39813			53.112	3.33143				16.507	1.08546			59.549	3.9158				37.685	1.11817			156.704	4.64964
			4.615	0.289474			40.228	2.52328				17.158	1.12827			60.182	3.95743				31.787	0.943168			125.604	3.72686
			16.758	1.05114			24.302	1.52433				18.145	1.19317			46.635	3.06661				10.628	0.315349			139.348	4.13466
			22.39	1.4044			26.507	1.66264				19.642	1.29161			39.745	2.61354				23.204	0.688497			167.511	4.9703
			10.779	0.676108			34.571	2.16845				20.546	1.35106			33.805	2.22294				35.419	1.05093			170.71	5.06522
			2.804	0.17588			59.401	3.7259				20.926	1.37604			37.005	2.43336				40.486	1.20128			128.216	3.80436
			12.5	0.784057			37.724	2.36622				19.153	1.25946			6.92	0.455043				34.107	1.01201			87.399	2.59326
			19.975	1.25292			48.364	3.03361				18.663	1.22723			56.977	3.74667				41.896	1.24312			168.119	4.98834
			15.018	0.941997			42.974	2.69552				17.64	1.15996			43.402	2.85401				32.557	0.966015			92.395	2.7415
			13.492	0.84628			9.877	0.61953				19.488	1.28148			65.553	4.31061				20.014	0.593845			89.033	2.64174
			9.11	0.571421			24.115	1.5126				21.044	1.3838			27.436	1.80413				44.56	1.32216			85.783	2.54531
			12.012	0.753447			33.535	2.10347				21.505	1.41412			81.799	5.37891				33.526	0.994766			206.155	6.11693
			20.177	1.26559			68.443	4.29306				9.977	0.656064			44.088	2.89912				40.028	1.18769			62.258	1.84729
			8.932	0.560256			14.21	0.891316				20.877	1.37282			41.585	2.73453				42.2	1.25214			159.742	4.73978
			9.358	0.586976			48.383	3.0348				17.009	1.11847			59.66	3.9231				33.285	0.987616			138.178	4.09995
			14.571	0.913959			20.437	1.2819				18.565	1.22079			117.124	7.7018				16.439	0.48777			124.424	3.69185
			23.388	1.467			65.956	4.13706				20.9	1.37433			51.748	3.40283				31.122	0.923436			116.218	3.44836
			18.476	1.1589			56.772	3.561				20.895	1.37401			37.094	2.43921				28.004	0.830921			208.371	6.18268
			18.264	1.1456			8.853	0.5553				22.361	1.47041			43.521	2.86184				30.159	0.894863			89.361	2.65147
			6.892	0.432298			59.349	3.72264				18.54	1.21915			51.949	3.41604				31.3	0.928718			122.153	3.62446
			16.463	1.03263			52.361	3.28432				21.024	1.38249			33.264	2.18736				47.758	1.41705			139.416	4.13668
			17.254	1.08225			58.169	3.64862				18.404	1.2102			50.585	3.32635				45.262	1.34299			177.28	5.26016
			19.403	1.21704			56.643	3.55291				20.048	1.31831			48.113	3.1638				39.221	1.16375			133.112	3.94963
			25.659	1.60945			22.57	1.41569				14.483	0.952368			30.364	1.99666				21.74	0.645058			76.338	2.26506
			21.225	1.33133			35.284	2.21317				18.923	1.24433			18.91	1.24348				21.283	0.631498			32.573	0.96649
			11.941	0.748994			6.082	0.381491				7.096	0.466616			38.872	2.55613				23.35	0.692829			201.063	5.96584
			24.28	1.52295			21.104	1.32374				16.086	1.05778			33.555	2.2065				45.597	1.35293			174.562	5.17952
			14.364	0.900975			5.639	0.353704				17.254	1.13458			54.573	3.58859				38.508	1.14259			108.839	3.22942
			11.31	0.709415			28.215	1.76977				14.239	0.936323			14.057	0.924355				17.516	0.519726			175.677	5.2126
			19.329	1.2124			37.77	2.36911				14.841	0.975909			35.116	2.30915				22.725	0.674285			207.673	6.16197
			12.812	0.803627			28.892	1.81224				14.606	0.960456			32.491	2.13653				28.414	0.843086			162.248	4.81414
			11.269	0.706843			16.928	1.0618				15.674	1.03069			39.261	2.58171				37.893	1.12434			10.707	0.317693
			16.317	1.02348			34.466	2.16186				13.465	0.885427			44.284	2.91201				24.748	0.73431			177.857	5.27728
			11.716	0.734881			26.039	1.63328				11.578	0.761342			61.877	4.06889				54.552	1.61864			156.769	4.65157
			15.398	0.965833			49.256	3.08956				17.044	1.12077			55.046	3.61969				33.871	1.005			52.72	1.56428
			6.044	0.379107			19.453	1.22018				11.893	0.782056			45.563	2.99612				34.928	1.03637			168.729	5.00644
			15.246	0.956299			25.954	1.62795				12.882	0.84709			30.142	1.98207				31.323	0.9294			101.393	3.00848
			16.106	1.01024			23.295	1.46117				18.083	1.1891			70.072	4.60777				39.317	1.16659			124.652	3.69861
			13.816	0.866602			22.448	1.40804				13.496	0.887465			18.129	1.19212				35.571	1.05544			92.606	2.74776
			16.408	1.02918			46.968	2.94605				6.802	0.447283			36.546	2.40318				29.915	0.887623			121.809	3.61425
			8.636	0.541689			47.469	2.97747				15.722	1.03384			21.377	1.4057				23.882	0.708615			122.143	3.62417
			10.105	0.633832			31.82	1.9959				17.526	1.15247			34.031	2.2378				40.428	1.19956			26.422	0.78398
			12.973	0.813726			46.731	2.93118				14.854	0.976764			36.72	2.41462				34.795	1.03242			177.512	5.26705
			13.654	0.856441			12.837	0.805195				12.171	0.800336			52.661	3.46286				42.427	1.25887			162.981	4.83589
			16.746	1.05039			38.103	2.38999				13.237	0.870434			31.613	2.0788				41.524	1.23208			124.841	3.70422
			13.791	0.865034			36.52	2.2907				15.31	1.00675			42.112	2.76919				52.493	1.55755			190.115	5.641
			17.328	1.08689			38.736	2.4297				14.218	0.934942			54.763	3.60109				41.192	1.22223			63.432	1.88212
			17.181	1.07767			69.409	4.35365				19.402	1.27583			39.859	2.62103				37.267	1.10577			133.144	3.95058
			28.47	1.78577			52.617	3.30038				11.531	0.758251			58.782	3.86537				61.25	1.81738			68.167	2.02262
			10.358	0.649701			72.79	4.56572				17.957	1.18081			53.161	3.49574				38.019	1.12808
			14.877	0.933153			35.029	2.19718				14.79	0.972555			31.972	2.1024				64.202	1.90497
			21.466	1.34645			20.861	1.3085				13.756	0.904562			13.742	0.903641				57.906	1.71816
			15.728	0.986532			35.58	2.23174				18.893	1.24236			13.634	0.89654				19.458	0.577348
			14.096	0.884165			55.208	3.4629				10.827	0.711958			11.33	0.745034				8.3	0.246273
			17.676	1.10872			40.658	2.55025				14.121	0.928564			13.222	0.869447				23.836	0.70725
			13.748	0.862337			73.631	4.61847				15.696	1.03213			9.96	0.654946				58.924	1.74836
			17.584	1.10295			47.443	2.97584				9.641	0.633969			12.266	0.806583				30.079	0.892489
			13.653	0.856378			68.556	4.30014				15.522	1.02069			11.293	0.742601				22.52	0.668202
			16.162	1.01375			19.717	1.23674				13	0.854849			14.69	0.96598				20.924	0.620846
			16.581	1.04004			33.696	2.11357				11.191	0.735894			5.912	0.388759				43.056	1.27754
			8.958	0.561887			40.885	2.56449				10.654	0.700582			13.056	0.858532				42.741	1.26819
			18.016	1.13005			36.695	2.30168				11.319	0.744311			15.906	1.04594				21.709	0.644138
			17.616	1.10496			38.605	2.42148				11.365	0.747335			8.094	0.532242				50.697	1.50426
			9.433	0.591681			113.723	7.13322				10.746	0.706632			13.718	0.902063				36.536	1.08408
			30.025	1.8833			53.988	3.38637				14.91	0.980446			14.685	0.965651				16.254	0.48228
			16.929	1.06186			50.87	3.1908				7.919	0.520735			12.659	0.832426				12.926	0.383534
			15.084	0.946137			70.492	4.42158				12.522	0.823417			11.689	0.768641				40.571	1.2038
			14.981	0.939677			57.238	3.59023				23.605	1.55221			13.995	0.920278				17.285	0.512872
			7.82	0.490506			28.484	1.78665				15.501	1.01931			9.115	0.599381				31.05	0.9213
			12.538	0.78644			71.723	4.49879				14.489	0.952762			12.301	0.808885				39.156	1.16182
			17.792	1.116			66.973	4.20085				15.077	0.991428			10.458	0.687693				40.893	1.21336
			15.766	0.988915			62.511	3.92097				16.274	1.07014			13.377	0.87964				20.586	0.610817
			21.375	1.34074			80.164	5.02825				13.608	0.89483			12.096	0.795404				64.837	1.92381
			19.012	1.19252			61.487	3.85674				16.003	1.05232			16.259	1.06915				37.802	1.12164
			14.072	0.88266			53.158	3.33431				24.647	1.62073			20.399	1.34139				21.422	0.635623
			18.9	1.18549			37.622	2.35982				14.683	0.965519			30.569	2.01015				52.396	1.55467
			12.161	0.762793			17.133	1.07466				16.818	1.10591			14.516	0.954538				19.601	0.581591
			16.138	1.01225			64.811	4.06524				14.475	0.951842			23.363	1.5363				39.398	1.169
			10.735	0.673348			43.676	2.73956				16.517	1.08612			13.961	0.918042				35.785	1.06179
			15.062	0.944757			82.837	5.19591				22.889	1.50513			74.417	4.89349				21.527	0.638738
			15.041	0.94344			49.999	3.13616				18.003	1.18383			53.246	3.50133				23.232	0.689328
			12.272	0.769756			50.959	3.19638				16.632	1.09368			50.046	3.29091				18.005	0.534235
			19.119	1.19923			46.947	2.94473				17.913	1.17792			76.287	5.01645				41.228	1.2233
			17.658	1.10759			43.459	2.72595				20.316	1.33593			13.687	0.900025				32.111	0.952781
			17.295	1.08482			40.643	2.54931				16.724	1.09973			55.124	3.62482				35.652	1.05785
			10.425	0.653903			56.626	3.55184				20.892	1.37381			69.769	4.58784				56.661	1.68122
			12.559	0.787758			54.621	3.42608				17.016	1.11893			33.433	2.19847				16.788	0.498125
			16.831	1.05572			46.468	2.91468				13.94	0.916661			76.555	5.03408				37.562	1.11452
			21.012	1.31797			32.202	2.01986				20.236	1.33067			50.262	3.30511				31.149	0.924237
			12.05	0.755831			29.686	1.86204				7.085	0.465893			52.683	3.46431				29.278	0.868722
			9.82	0.615955			80.552	5.05259				13.766	0.90522			45.859	3.01558				27.908	0.828072
			13.996	0.877893			26.055	1.63429				18.705	1.23			40.635	2.67206				44.429	1.31827
			21.864	1.37141			13.842	0.868233				17.721	1.16529			61.954	4.07395				42.598	1.26395
			18.072	1.13356			20.298	1.27318				21.331	1.40268			39.814	2.61807				30.134	0.894121
			12.228	0.766996			70.088	4.39624				15.282	1.00491			48.885	3.21456				31.717	0.941091
			17.21	1.07949			5.549	0.348059				16.095	1.05837			54.837	3.60595				21.794	0.646661
			18.797	1.17903			63.102	3.95804				18.838	1.23874			58.053	3.81743				39.791	1.18066
			14.422	0.904614			45.179	2.83383				17.998	1.18351			45.814	3.01262				45.54	1.35124
			7.856	0.492764			21.775	1.36583				16.587	1.09072			51.899	3.41276				19.892	0.590225
			11.184	0.701511			105.665	6.62779				21.042	1.38367			52.4	3.4457				29.807	0.884418
			7.031	0.441016			81.464	5.10979				10.894	0.716364			34.964	2.29915				11.638	0.345317
			12.781	0.801683			116.15	7.28546				21.934	1.44233			84.719	5.57092				30.339	0.900203
			28.73	1.80208			102.818	6.44921				15.994	1.05173			72.452	4.76427				29.084	0.862966
			18.786	1.17834			98.172	6.15779				19.57	1.28688			14.255	0.937375				32.31	0.958686
			10.463	0.656287			62.723	3.93427				8.694	0.571697			45.24	2.97488				50.191	1.48924
			12.764	0.800616								11.133	0.73208			39.115	2.57211				31.15	0.924267
			13.216	0.828968								25.257	1.66084			31.124	2.04664				32.949	0.977646
			14.027	0.879837								14.877	0.978276			13.547	0.890819				35.367	1.04939
			29.703	1.86311								9.998	0.657445			35.087	2.30724				29.712	0.881599
			15.686	0.983897								13.436	0.88352			20.537	1.35046				27.262	0.808904
			14.029	0.879963								19.671	1.29352			37.374	2.45763				41.076	1.21879
			21.452	1.34557								20.958	1.37815			41.829	2.75058				19.566	0.580552
			23.565	1.4781								16.737	1.10059			15.906	1.04594				56.995	1.69113
			11.794	0.739773								14.84	0.975843			25.999	1.70963				64.207	1.90512
			18.241	1.14416								18.062	1.18771			34.559	2.27252				54.254	1.6098
			29.519	1.85157								14.762	0.970714			18.719	1.23092				49.573	1.4709
			25.498	1.59935								16.468	1.0829			42.201	2.77504				55.535	1.64781
			31.53	1.97771								14.652	0.963481			32.153	2.11431				61.216	1.81637
			21.85	1.37053								11.824	0.777518			30.03	1.9747				27.589	0.818607
			16.079	1.00855								18.442	1.2127			27.896	1.83437				34.841	1.03378
			14.673	0.920357								6.523	0.428937			31.725	2.08616				44.565	1.32231
			16.52	1.03621								13.797	0.907258			49.289	3.24113				52.029	1.54378
			12.421	0.779102								10.533	0.692625			40.713	2.67719				39.235	1.16416
			7.319	0.459081								11.568	0.760684			43.569	2.86499				15.219	0.45157
			14.739	0.924497								18.14	1.19284			41.082	2.70146				59.013	1.751
			25.825	1.61986								11.246	0.73951			18.498	1.21638				15.5	0.459908
			5.611	0.351947								14.346	0.943359			13.689	0.900156				47.136	1.3986
			14.259	0.894389								6.085	0.400135			10.378	0.682433				18.294	0.54281
			18.664	1.17069								5.342	0.351277			13.394	0.880758				64.289	1.90755
			25.21	1.58129								13.123	0.862937			12.163	0.79981				39.632	1.17594
			16.185	1.0152								17.388	1.14339			14.067	0.925013				44.822	1.32994
			7.432	0.466169								14.394	0.946515			17.917	1.17818				38.57	1.14443
			17.659	1.10765								14.407	0.94737			12.775	0.840054				67.912	2.01505
			20.962	1.31483								7.721	0.507715			13.786	0.906535				39.778	1.18027
			8.066	0.505936								14.991	0.985773			20.075	1.32008				32.917	0.976697
			6.162	0.386509								9.521	0.626078			16.635	1.09388				49.65	1.47319
			3.145	0.197269								13.876	0.912453			13.786	0.906535				41.193	1.22226
			17.045	1.06914								14.046	0.923632			17.067	1.12229				42.445	1.25941
			10.102	0.633643								13.676	0.899301			14.075	0.925539				28.868	0.856557
			16.245	1.01896								11.022	0.724781			18.066	1.18798				44.286	1.31403
			24.305	1.52452								14.828	0.975054			18.095	1.18988				33.546	0.99536
			18.332	1.14987								6.938	0.456226			15.961	1.04956				28.432	0.84362
			21.525	1.35015								6.369	0.41881			13.674	0.89917				19.991	0.593163
			20.56	1.28962								15.145	0.995899			15.108	0.993466				41.08	1.2189
			19.711	1.23636								12.775	0.840054			9.882	0.649817				45.53	1.35094
			19.884	1.24722								11.116	0.730962			16.929	1.11321				27.769	0.823948
			9.041	0.567093								11.331	0.7451			19.028	1.25124				59.496	1.76534
			19.879	1.2469								19.969	1.31311			14.92	0.981104				24.345	0.722353
			14.008	0.878646								10.092	0.663626			11.38	0.748322				24.901	0.73885
			20.825	1.30624								6.922	0.455174			11.257	0.740234				17.225	0.511091
			9.352	0.5866								5.833	0.383564			14.357	0.944082				15.485	0.459463
			26.73	1.67663								15.197	0.999319			16.386	1.0775				23.379	0.69369
			11.905	0.746736								11.082	0.728726			17.35	1.14089				34.66	1.02841
			15.134	0.949273								6.588	0.433211			15.264	1.00372				40.413	1.19911
			15.575	0.976935								9.656	0.634956			15.133	0.99511				29.499	0.875279
			15.796	0.990797								10.914	0.717679			28.21	1.85502				34.617	1.02714
			30.828	1.93367								9.905	0.651329			19.69	1.29477				20.017	0.593934
			21.753	1.36445								8.705	0.57242			23.781	1.56378				40.204	1.19291
			17.348	1.08815								13.736	0.903247			14.113	0.928037				14.092	0.418131
			23.934	1.50125								12.536	0.824338			18.273	1.20159				28.394	0.842492
			25.87	1.62268								10.682	0.702423			16.87	1.10933				41.876	1.24252
			18.251	1.14479								8.955	0.58886			15.118	0.994124				33.989	1.0085
			9.211	0.577756								8.591	0.564924			27.35	1.79847				18.509	0.54919
			2.7	0.169356								12.406	0.815789			27.395	1.80143				21.055	0.624733
			18.366	1.152								12.656	0.832229			18.879	1.24144				30.801	0.913912
			22.059	1.38364								8.866	0.583007			14.506	0.95388				22.174	0.657936
			19.464	1.22087								14.503	0.953683			8.824	0.580245				24.939	0.739977
			20.2	1.26704								12.222	0.80369			10.159	0.668032				42.006	1.24638
			7.358	0.461527								14.079	0.925802			12.154	0.799218				43.418	1.28828
			18.978	1.19039								12.31	0.809476			15.521	1.02062				45.583	1.35252
			23.135	1.45113								17.001	1.11795			14.2	0.933758				33.024	0.979871
			18.846	1.18211								8.788	0.577878			18.859	1.24012				13.74	0.407686
			17.064	1.07033								7.52	0.494497			14.782	0.972029				34.849	1.03402
			1.924	0.120682								10.737	0.70604			15.758	1.03621				22.054	0.654375
			8.296	0.520363								8.262	0.54329			14.428	0.948751				35.438	1.0515
			10.995	0.689656								21.023	1.38242			70.794	4.65525				25.937	0.76959
			20.395	1.27927								19.55	1.28556			32.942	2.16619				33.889	1.00554
			7.051	0.442271								18.209	1.19738			48.873	3.21377				26.794	0.795018
			13.077	0.820249								16.44	1.08106			45.948	3.02143				43.76	1.29842
			20.683	1.29733								19.474	1.28056			67.83	4.46034				26.906	0.798341
			22.176	1.39098								27.639	1.81748			43.864	2.88439				19.679	0.583905
			4.663	0.292485								16.232	1.06738			37.989	2.49807				27.806	0.825046
			12.899	0.809084								10.75	0.706895			94.918	6.24158				40.566	1.20365
			25.161	1.57821								18.926	1.24453			25.158	1.65433				46.812	1.38898
			12.559	0.787758								12.495	0.821642			44.074	2.8982				40.062	1.1887
			15.623	0.979946								11.531	0.758251			32.788	2.15606				26.842	0.796442
			11.496	0.721081								16.82	1.10604			36.043	2.3701				42.811	1.27027
			26.49	1.66157								19.984	1.3141			92.022	6.05115				43.827	1.30041
			26.662	1.67236								18.437	1.21237			77.298	5.08293				33.556	0.995657
			26.251	1.64658								21.034	1.38315			75.808	4.98495				20.256	0.601026
			17.418	1.09254								13.386	0.880232			52.343	3.44195				35.712	1.05963
			13.135	0.823887								21.69	1.42628			66.771	4.3907				49.876	1.4799
			17.452	1.09467								20.224	1.32988			73.408	4.82714				33.4	0.991028
			14.831	0.930268								11.33	0.745034			31.465	2.06906				48.949	1.45239
			24.919	1.56303								18.333	1.20553			49.464	3.25264				48.747	1.4464
			16.671	1.04568								17.097	1.12426			53.98	3.5496				45.987	1.3645
			13.039	0.817865								13.203	0.868198			61.09	4.01713				16.11	0.478008
			12.451	0.780983								19.803	1.3022			63.338	4.16496				22.063	0.654642
			13.248	0.830975								11.974	0.787382			49.085	3.22771				49.667	1.47369
			10.717	0.672219								9.751	0.641203								28.169	0.835816
			12.133	0.761037								10.654	0.700582								34.884	1.03506
			20.357	1.27688								18.837	1.23868								28.695	0.851424
			21.078	1.32211								2.702	0.177677								24.094	0.714905
			7.887	0.494709								13.478	0.886281								17.754	0.526788
			12.252	0.768501								8.724	0.57367								39.747	1.17935
			16.432	1.03069								12.603	0.828743								16.764	0.497413
			20.811	1.30536								8.046	0.529086								18.713	0.555243
			15.354	0.963073								19.936	1.31094								43.041	1.27709
			15.356	0.963198								15.424	1.01425								33.427	0.991829
			9.469	0.593939								9.02	0.593134								25.34	0.751876
			23.779	1.49153								6.48	0.426109								29.739	0.882401
			4.556	0.285773								15.166	0.99728								23.832	0.707131
			7.568	0.474699								16.164	1.06291								16.726	0.496285
			17.017	1.06738								14.255	0.937375								44.468	1.31943
			14.558	0.913144								15.342	1.00885								22.517	0.668113
			11.487	0.720517								14.751	0.969991								44.931	1.33317
			18.072	1.13356								15.916	1.0466								31.159	0.924534
			11.509	0.721897								12.784	0.840646								30.303	0.899135
			17.931	1.12471								19.926	1.31029								45.409	1.34735
			18.424	1.15564								15.261	1.00353								42.779	1.26932
			14.628	0.917535								4.712	0.30985								49.28	1.46221
			14.13	0.886298								15.402	1.0128								27.34	0.811219
			14.003	0.878332								6.63	0.435973								26.015	0.771904
			5.32	0.333695								8.304	0.546051								28.921	0.858129
			27.05	1.6967								5.994	0.394151								26.509	0.786562
			20.131	1.26271								9.289	0.610823								16.129	0.478572
			17.448	1.09442								12.303	0.809016								14.084	0.417893
			16.243	1.01883								17.408	1.14471								23.38	0.69372
			19.154	1.20143								9.811	0.645148								19.467	0.577615
			10.972	0.688214								5.07	0.333391								19.12	0.567319
			16.989	1.06563								19.526	1.28398								25.122	0.745407
			11.701	0.73394								10.127	0.665928								31.872	0.94569
			27.903	1.7502								22.83	1.50125								25.349	0.752143
			17.219	1.08005								15.794	1.03858								28.651	0.850118
			15.276	0.95818								6.846	0.450177								41.442	1.22965
			17.518	1.09881								15.3	1.00609								25.368	0.752706
			15.104	0.947392								13.208	0.868527								39.441	1.17027
			18.543	1.1631								14.07	0.92521								39.606	1.17517
			13.369	0.838565								12.514	0.822891								41.221	1.22309
			10.463	0.656287								15.4	1.01267								53.427	1.58526
			12.517	0.785123								9.884	0.649948								39.217	1.16363
			24.218	1.51906								12.25	0.805531								48.536	1.44014
			3.833	0.240423								19.57	1.28688								26.414	0.783743
			14.477	0.908063								2.523	0.165907								24.457	0.725676
			9.926	0.622604								9.402	0.618253								44.385	1.31697
			24.196	1.51768								18.398	1.20981								30.602	0.908007
			12.948	0.812158								17.687	1.16306								51.63	1.53194
			14.223	0.892131								15.609	1.02641								36.229	1.07497
			25.23	1.58254								7.668	0.50423								24.469	0.726032
			20.054	1.25788								15.168	0.997412								27.487	0.81558
			14.985	0.939927								16.096	1.05843								34.958	1.03726
			10.508	0.65911								19.787	1.30115								20.813	0.617553
			17.555	1.10113								15.901	1.04561								26.714	0.792644
			9.919	0.622165								18.672	1.22783								32.187	0.955036
			17.034	1.06845								14.617	0.961179								52.444	1.55609
			10.671	0.669334								13.598	0.894172								28.35	0.841187
			6.947	0.435747								11.72	0.770679								32.454	0.962959
			16.06	1.00736								18.699	1.2296								35.214	1.04485
			15.124	0.948646								15.068	0.990836								18.264	0.54192
			11.604	0.727856								19.414	1.27662								12.832	0.380745
			17.625	1.10552								9.119	0.599644								33.229	0.985954
			7.102	0.44547								15.084	0.991888								21.027	0.623902
			17.926	1.1244								11.974	0.787382								21.902	0.649865
			19.583	1.22833								11.918	0.783699								31.437	0.932783
			1.693	0.106193								19.196	1.26228								21.586	0.640489
			13.349	0.83731								8.691	0.5715								16.761	0.497324
			13.789	0.864909								14.46	0.950855								48.589	1.44171
			15.269	0.957741								16.047	1.05521								42.801	1.26997
			18.638	1.16906								13.151	0.864779								16.878	0.500795
			19.753	1.239								2.522	0.165841								22.657	0.672267
			16.348	1.02542								15.521	1.02062								26.959	0.799914
			14.608	0.91628								14.413	0.947765								19.315	0.573105
			21.987	1.37912								10.196	0.670465								25.803	0.765614
			16.504	1.03521								30.158	1.98312								30.977	0.919134
			17.459	1.09511								11.058	0.727148								25.155	0.746386
			19.861	1.24577								17.774	1.16878								23.277	0.690663
			15.03	0.94275								12.555	0.825587								10.024	0.297427
			9.976	0.62574								13.402	0.881284								16.47	0.488689
			7.324	0.459395								14.383	0.945792
			19.873	1.24653								5.384	0.354039
			6.365	0.399242								11.339	0.745626
			22.204	1.39274								19.172	1.26071
			20.848	1.30768								7.691	0.505742
			14.456	0.906746								13.339	0.877141
			8.46	0.53065								8.364	0.549997
			13.461	0.844335								6.963	0.45787
			8.848	0.554987								11.229	0.738392
			14.106	0.884793								16.91	1.11196
			18.097	1.13513								10.049	0.660798
			18.983	1.1907								13.638	0.896803
			14.074	0.882785								10.923	0.718271
			25.442	1.59584								17.995	1.18331
			15.355	0.963136								13.856	0.911138
			13.286	0.833358								8.914	0.586164
			17.743	1.11292								19.119	1.25722
			16.313	1.02323								14.694	0.966243
			16.826	1.0554								14.881	0.978539
			14.282	0.895832								15.715	1.03338
			15.808	0.99155								14.046	0.923632
			15.606	0.978879								9.288	0.610757
			8.392	0.526384								11.28	0.741746
			15.234	0.955546								12.915	0.84926
			16.047	1.00654								21.668	1.42484
			15.833	0.993118								23.65	1.55517
			7.584	0.475703								17.402	1.14431
			17.049	1.06939								12.377	0.813882
			13.664	0.857068								24.734	1.62645
			26.658	1.67211								18.527	1.21829
			14.413	0.904049								3.811	0.250602
			7.761	0.486805								6.668	0.438472
			14.317	0.898027								16.117	1.05982
			4.621	0.28985								16.017	1.05324
			17.879	1.12145								15.669	1.03036
			2.582	0.161955								7.694	0.505939
			6.344	0.397925								15.86	1.04292
			13.003	0.815607								12.697	0.834925
			8.311	0.521304								9.017	0.592937
			13.31	0.834864								9.288	0.610757
			23.981	1.5042								20.435	1.34376
			13.591	0.852489								14.444	0.949803
			13.841	0.868171								13.266	0.872341
			15.344	0.962446								7.399	0.486541
			13.252	0.831226								8.394	0.55197
			18.179	1.14027								6.109	0.401713
			8.002	0.501922								14.606	0.960456
			10.312	0.646816								8.962	0.58932
			13.343	0.836934								8.477	0.557427
			20.911	1.31163								7.879	0.518104
			7.716	0.483983								11.759	0.773244
			13.251	0.831163								13.138	0.863924
			3.972	0.249142								21.543	1.41662
			13.485	0.845841								23.493	1.54484
			1.647	0.103307								10.946	0.719783
			19.424	1.21836								7.663	0.503901
			4.629	0.290352								12.09	0.79501
			11.861	0.743976								24.533	1.61323
			23.346	1.46437								9.257	0.608718
			11.908	0.746924								6.722	0.442023
			3.028	0.18993								19.536	1.28464
			9.731	0.610373								16.137	1.06113
			0.875	0.054884								17.767	1.16832
			3.172	0.198962								7.99	0.525403
			12.16	0.762731								11.461	0.753648
			1.407	0.0882534								15.146	0.995965
			4.404	0.276239								21.863	1.43766
			17.078	1.07121								24.511	1.61179
			10.55	0.661744								26.887	1.76803
			11.28	0.707533								22.496	1.47928
			7.971	0.499977								14.018	0.92179
			7.731	0.484924								13.947	0.917122
			19.94	1.25073								36.178	2.37898
			10.561	0.662434								7.248	0.476611
			19.787	1.24113								13.184	0.866949
			8.162	0.511958								17.902	1.17719
			19.365	1.21466								6.779	0.445771
			1.542	0.0967213								7.022	0.46175
			8.999	0.564458								11.281	0.741812
			2.429	0.152358								13.491	0.887136
			24.698	1.54917								25.334	1.6659
			6.236	0.39115								13.384	0.8801
			7.375	0.462594								12.395	0.815066
			16.477	1.03351								26.908	1.76941
			14.095	0.884103								14.476	0.951907
			5.761	0.361356								31.895	2.09734
			21.68	1.35987								18.449	1.21316
			20.508	1.28636								34.86	2.29231
			16.667	1.04543								24.89	1.63671
			29.727	1.86461								13.036	0.857216
			17.9	1.12277								17.431	1.14622
			19.152	1.2013								17.774	1.16878
			4.328	0.271472								17.895	1.17673
			13.772	0.863843								22.831	1.50131
			13.14	0.824201								20.913	1.37519
			15.21	0.95404								42.647	2.80437
			6.274	0.393534								23.08	1.51769
			16.291	1.02185								17.513	1.15161
			9.023	0.565964								47.184	3.10271
			16.525	1.03652								11.248	0.739642
			14.512	0.910259								19.08	1.25466
			12.976	0.813914								11.366	0.747401
			10.707	0.671592								39.089	2.5704
			8.064	0.505811								25.899	1.70306
			1.696	0.106381								11.977	0.787579
			8.649	0.542505								24.712	1.625
			12.163	0.762919								17.744	1.1668
			13.72	0.860581								22.868	1.50375
			12.915	0.810088								13.869	0.911993
			3.158	0.198084								18.294	1.20297
			24.556	1.54026								22.996	1.51216
			11.707	0.734316								22.774	1.49756
			10.673	0.669459								15.101	0.993006
			24.413	1.53129
			8.516	0.534162
			19.303	1.21077
			23.433	1.46982
			6.017	0.377414
			11.378	0.71368
			13.01	0.816046
			8.792	0.551474
			27.287	1.71156
			14.033	0.880214
			9.427	0.591304
			14.438	0.905617
			16.179	1.01482
			17.494	1.0973
			12.677	0.795159
			13.468	0.844774
			7.548	0.473445
			14.267	0.894891
			8.47	0.531277
			16.054	1.00698
			24.695	1.54898
			14.235	0.892884
			6.188	0.38814
			22.817	1.43119
			11.151	0.699441
			17.064	1.07033
			12.589	0.789639
			13.244	0.830724
			19.161	1.20187
			26.353	1.65298
			16.496	1.0347
			20.145	1.26359
			14.161	0.888242
			5.74	0.360039
			7.135	0.44754
			13.284	0.833233
			20.214	1.26791
			16.319	1.0236
			13.423	0.841952
			16.276	1.0209
			21.334	1.33817
			3.534	0.221669
			8.484	0.532155
			13.558	0.850419
			10.04	0.629755
			6.351	0.398364
			23.92	1.50037
			15.535	0.974426
			16.184	1.01513
			14.506	0.909882
			10.568	0.662873
			11.767	0.73808
			9.681	0.607236
			0.987	0.0619091
			17.985	1.1281
			23.296	1.46123
			17.43	1.09329
			19.341	1.21316
			17.176	1.07736
			17.365	1.08921
			9.717	0.609494
			6.689	0.419565
			12.21	0.765867
			8.969	0.562577
			16.669	1.04556
			15.881	0.996129
			24.572	1.54127
			10.607	0.665319
			16.091	1.0093
			13.762	0.863215
			6.559	0.41141
			7.51	0.471061
			18.056	1.13255
			16.929	1.06186
			10.244	0.64255
			15.488	0.971478
			13.775	0.864031
			3.294	0.206615
			14.733	0.924121
			16.461	1.03251
			13.653	0.856378
			20.43	1.28146
			16.486	1.03408
			7.021	0.440389
			11.882	0.745293
			17.515	1.09862
			11.023	0.691413
			26.266	1.64752
			24.676	1.54779
			21.46	1.34607
			21.807	1.36783
			12.996	0.815168
			13.183	0.826898
			8.888	0.557496
			23.473	1.47233
			12.582	0.7892
			18.318	1.14899
			23.414	1.46863
			14.483	0.90844
			5.945	0.372897
			21.714	1.362
			24.705	1.54961
			15.489	0.971541
			10.689	0.670463
			11.813	0.740965
			15.072	0.945384
			21.97	1.37806
			19.686	1.2348
			17.436	1.09367
			10.242	0.642425
			16.531	1.0369
			19.346	1.21347
			17.871	1.12095
			20.14	1.26327
			18.282	1.14673
			20.315	1.27425
			19.799	1.24188
			21.706	1.3615
			9.478	0.594503
			15.68	0.983521
			7.643	0.479404
			20.753	1.30172
			15.929	0.999139
			18.455	1.15758
			14.048	0.881155
			7.865	0.493329
			25.605	1.60606
			17.047	1.06927
			8.939	0.560695
			13.157	0.825267
			6.104	0.382871
			25.364	1.59095
			8.256	0.517854
			11.198	0.70239
			15.199	0.95335
			20.221	1.26835
			10.287	0.645247
			11.767	0.73808
			22.303	1.39895
			24.661	1.54685
			27.802	1.74387
			14.399	0.903171
			18.695	1.17264
			16.756	1.05101
			23.82	1.4941
			9.664	0.60617
			21.396	1.34205
			15.232	0.95542
			12.131	0.760912
			4.454	0.279375
			6.549	0.410783
			18.575	1.16511
			10.095	0.633204
			26.259	1.64708
			21.259	1.33346
			2.458	0.154177
			19.534	1.22526
			12.968	0.813412
			17.705	1.11054
			14.893	0.934157
			5.566	0.349125
			10.414	0.653213
			10.563	0.662559
			22.447	1.40798
			21.009	1.31778
			12.263	0.769191
			6.228	0.390649
			15.677	0.983333
			12.672	0.794846
			17.618	1.10508
			9.933	0.623043
			10.889	0.683008
			15.947	1.00027
			12.894	0.80877
			5.88	0.36882
			19.43	1.21874
			18.956	1.18901
			26.487	1.66139
			18.878	1.18411
			11.588	0.726852
			18.723	1.17439
			12.571	0.78851
			24.736	1.55155
			17.57	1.10207
			25.805	1.61861
			10.137	0.635839
			15.147	0.950089
			14.07	0.882534
			7.913	0.496339
			11.801	0.740212
			15.484	0.971227
			16.985	1.06538
			7.235	0.453812
			8.312	0.521366
			14.277	0.895518
			16.592	1.04073
			6.856	0.43004
			11.748	0.736888
			16.638	1.04361
			19.542	1.22576
			19.624	1.23091
			16.507	1.03539
			12.746	0.799487
			13.348	0.837247
			16.28	1.02116
			16.722	1.04888
			10.501	0.658671
			19.747	1.23862
			12.664	0.794344
			8.978	0.563141
			8.274	0.518983
			14.716	0.923055
			14.978	0.939488
			15.294	0.959309
			15.445	0.968781
			13.795	0.865285
			18.091	1.13475
			14.391	0.902669
			13.462	0.844398
			17.849	1.11957
			4.687	0.29399
			11.517	0.722399
			15.885	0.99638
			23.37	1.46587
			21.747	1.36407
			10.217	0.640857
			29.057	1.82259
			25.016	1.56912
			25.004	1.56836
			12.595	0.790016
			22.879	1.43508
			17.099	1.07253
			15.616	0.979507
			21.929	1.37549
			18.557	1.16398
			10.707	0.671592
			11.539	0.723779
			14.915	0.935537
			7.913	0.496339
			21.343	1.33873
			26.374	1.6543
			9.618	0.603285
			10.231	0.641735
			24.632	1.54503
			23.937	1.50144
			17.107	1.07303
			13.518	0.847911
			17.46	1.09517
			22.933	1.43846
			10.061	0.631072
			15.083	0.946074
			13.608	0.853556
			14.805	0.928637
			16.513	1.03577
			8.164	0.512083
			19.236	1.20657
			19.852	1.24521
			9.176	0.575561
			10.651	0.668079
			9.22	0.57832
			23.588	1.47955
			28.981	1.81782
			22.706	1.42422
			16.572	1.03947
			22.107	1.38665
			14.19	0.890061
			14.845	0.931146
			12.268	0.769505
			4.681	0.293614
			9.301	0.583401
			17.13	1.07447
			10.865	0.681502
			21.073	1.32179
			19.918	1.24935
			10.886	0.682819
			14.097	0.884228
			14.219	0.89188
			12.948	0.812158
			16.733	1.04957
			7.389	0.463472
			8.052	0.505058
			16.307	1.02285
			14.816	0.929327
			15.885	0.99638
			20.471	1.28403
			9.388	0.588858
			15.668	0.982768
			19.782	1.24082
			21.979	1.37862
			26.981	1.69237
			18.343	1.15056
			13.902	0.871997
			18.127	1.13701
			16.72	1.04875
			19.955	1.25167
			19.442	1.21949
			12.788	0.802122
			19.293	1.21014
			14.849	0.931397
			20.734	1.30053
			10.509	0.659172
			10.791	0.676861
			7.677	0.481536
			22.851	1.43332
			20.167	1.26497
			27.846	1.74663
			19.223	1.20575
			11.89	0.745795
			16.66	1.04499
			3.046	0.191059
			19.816	1.24295
			13.013	0.816235
			10.118	0.634647
			14.544	0.912266
			12.899	0.809084
			14.715	0.922992
			16.112	1.01062
			16.905	1.06036
			15.063	0.94482
			26.215	1.64432
			13.483	0.845715
			8.355	0.524064
			10.925	0.685266
			16.67	1.04562
			17.237	1.08118
			9.743	0.611125
			16.179	1.01482
			12.51	0.784684
			7.174	0.449986
			15.57	0.976621
			26.347	1.6526
			12.568	0.788322
			25.86	1.62206
			16.117	1.01093
			12.177	0.763797
			14.868	0.932589
			9.687	0.607613
			7.632	0.478714
			18.647	1.16962
			10.969	0.688026
			21.27	1.33415
			20.27	1.27143
			9.692	0.607926
			13.733	0.861396
			23.683	1.48551
			9.873	0.61928
			10.172	0.638034
			18.494	1.16003
			16.314	1.02329
			14.603	0.915967
			6.537	0.41003
			20.653	1.29545
			21.616	1.35585
			12.431	0.779729
			18.876	1.18399
			10.735	0.673348
			14.852	0.931585
			13.1	0.821692
			18.684	1.17195
			10.838	0.679809
			13.128	0.823448
			15.604	0.978754
			6.719	0.421446
			11.263	0.706467
			19.697	1.23549
			12.624	0.791835
			16.818	1.0549
			2.768	0.173622
			14.737	0.924372
			8.598	0.539306
			10.578	0.6635
			3.303	0.207179
			14.573	0.914085
			12.269	0.769568
			14.625	0.917347
			8.665	0.543508
			20.729	1.30022
			15.639	0.980949
			16.732	1.04951
			16.728	1.04926
			27.935	1.75221
			9.608	0.602658
			18.944	1.18825
			16.024	1.0051
			12.644	0.793089
			16.335	1.02461
			9.193	0.576627
			13.269	0.832292
			14.265	0.894766
			26.435	1.65812
			14.158	0.888054
			27.048	1.69657
			21.878	1.37229
			13.304	0.834487
			10.066	0.631385
			9.479	0.594566
			1.056	0.0662371
			3.659	0.229509
			8.832	0.553983
			18.089	1.13462
			2.306	0.144643
			14.773	0.92663
			11.665	0.731682
			10.249	0.642864
			3.292	0.206489
			28.762	1.80408
			17.227	1.08056
			7.669	0.481035
			25.294	1.58655
			21.063	1.32117
			16.784	1.05277
			12.783	0.801808
			14.227	0.892382
			11.071	0.694424
			16.401	1.02875
			14.674	0.92042
			14.264	0.894703
			15.531	0.974175
			10.154	0.636905
			12.452	0.781046
			20.697	1.29821
			14.054	0.881531
			7.755	0.486429
			29.699	1.86286
			8.662	0.54332
			15.792	0.990546
			13.304	0.834487
			13.619	0.854246
			21.54	1.35109
			24.724	1.5508
			22.448	1.40804
			9.511	0.596573
			28.228	1.77059
			7.959	0.499225
			23.395	1.46744
			20.234	1.26917
			19.24	1.20682
			17.762	1.11411
			16.425	1.03025
			20.64	1.29463
			6.684	0.419251
			15.202	0.953539
			14.889	0.933906
			18.238	1.14397
			13.148	0.824702
			21.02	1.31847
			17.535	1.09988
			20.842	1.30731
			12.202	0.765365
			16.163	1.01382
			17.927	1.12446
			10.288	0.64531
			12.775	0.801306
			15.533	0.9743
			11.221	0.703832
			18.78	1.17797
			12.413	0.7786
			12.281	0.77032
			12.589	0.789639
			11.564	0.725347
			12.048	0.755705
			13.514	0.84766
			7.83	0.491133
			16.3	1.02241
			15.841	0.99362
			6.142	0.385254
			4.198	0.263318
			9.247	0.580014
			6.979	0.437755
			11.406	0.715436
			6.414	0.402315
			14.66	0.919542
			9.719	0.60962
			13.625	0.854622
			11.107	0.696682
			10.033	0.629315
			24.064	1.5094
			9.851	0.6179
			10.322	0.647443
			10.316	0.647066
			8.084	0.507065
			11.895	0.746109
			27.55	1.72806
			12.927	0.81084
			12.146	0.761852
			29.073	1.82359
			23.974	1.50376
			23.463	1.47171
			7.302	0.458015
			15.593	0.978064
			26.269	1.64771
			30.746	1.92853
			24.826	1.5572
			20.722	1.29978
			23.804	1.4931
			10.092	0.633016
			13.799	0.865536
			21.836	1.36965
			29.487	1.84956
			20.651	1.29532
			32.793	2.05693
			5.181	0.324976
			20.332	1.27532
			20.061	1.25832
			20.709	1.29896
			12.549	0.78713
			8.363	0.524565
			15.205	0.953727
			18.491	1.15984
			21.414	1.34318
			18.286	1.14698
			24.114	1.51254
			16.925	1.06161
			17.641	1.10652
			24.303	1.52439
			13.275	0.832668
			20.399	1.27952
			16.096	1.00961
			18.627	1.16837
			15.305	0.959999
			17.12	1.07384
			19.387	1.21604
			13.482	0.845652
			12.187	0.764424
			21.994	1.37956
			13.22	0.829219
			8.139	0.510515
			17.107	1.07303
			18.333	1.14993
			14.651	0.918977
			11.824	0.741655
			9.508	0.596385
			15.744	0.987535
			17.434	1.09354
			18.442	1.15677
			14.246	0.893574
			12.841	0.805446
			11.56	0.725096
			8.533	0.535229
			9.551	0.599082
			19.164	1.20205
			10.695	0.670839
			15.35	0.962822
			4.662	0.292422
			20.123	1.26221
			16.061	1.00742
			18.906	1.18587
			15.55	0.975367
			13.265	0.832041
			17.933	1.12484
			27.849	1.74682
			13.414	0.841387
			12.527	0.78575
			9.792	0.614199
			11.833	0.74222
			15.192	0.952911
			14.778	0.926943
			10.626	0.666511
			10.874	0.682067
			12.129	0.760786
			14.423	0.904676
			14.216	0.891692
			7.672	0.481223
			15.283	0.958619
			16.997	1.06613
			10.054	0.630633
			28.143	1.76526
			12.386	0.776906
			10.417	0.653402
			19.418	1.21799
			10.973	0.688277
			5.789	0.363112
			26.887	1.68648
			22.243	1.39518
			19.76	1.23944
			18.839	1.18167
			10.968	0.687963
			14.017	0.87921
			20.856	1.30818
			21.021	1.31853
			23.286	1.4606
			22.611	1.41826
			14.696	0.9218
			9.096	0.570543
			12.504	0.784308
			15.596	0.978252
			12.847	0.805822
			14.213	0.891504
			21.821	1.36871
			20.16	1.26453
			13.984	0.87714
			26.491	1.66164
			8.954	0.561636
			13.229	0.829783
			10.796	0.677174
			7.873	0.49383
			32.297	2.02581
			19.723	1.23712
			21.269	1.33409
			9.261	0.580892
			27.126	1.70147
			16.026	1.00522
			13.059	0.81912
			16.038	1.00598
			11	0.68997
			17.361	1.08896
			6.987	0.438256
			14.983	0.939802
			18.685	1.17201
			7.49	0.469807
			31.319	1.96447
			8.499	0.533096
			25.692	1.61152
			11.626	0.729236
			9.995	0.626932
			9.25	0.580202
			16.83	1.05565
			7.537	0.472755
			5.57	0.349376
			2.816	0.176632
			18.109	1.13588
			17.688	1.10947
			3.03	0.190055
			7.818	0.490381
			16.576	1.03972
			11.536	0.72359
			7.256	0.455129
			3.69	0.231454
			13.485	0.845841
			5.703	0.357718
			9.118	0.571922
			18.007	1.12948
			10.752	0.674414
			17.634	1.10608
			23.662	1.48419
			13.955	0.875321
			31.177	1.95556
			24.466	1.53462
			10.431	0.65428
			18.878	1.18411
			6.104	0.382871
			12.725	0.79817
			1.775	0.111336
			15.515	0.973171
			18.523	1.16185
			19.336	1.21284
			19.976	1.25299
			23.925	1.50068
			31.111	1.95142
			21.684	1.36012
			14.312	0.897714
			36.964	2.31855
			27.652	1.73446
			18.189	1.1409
			26.364	1.65367
			14.005	0.878457
			17.895	1.12246
			18.117	1.13638
			21.387	1.34149
			19.122	1.19942
			20.002	1.25462
			29.896	1.87521
			17.121	1.07391
			27.016	1.69457
			20.371	1.27776
			12.975	0.813851
			12.766	0.800742
			22.53	1.41318
			15.474	0.9706
			24.28	1.52295
			22.125	1.38778
			22.939	1.43884
			27.88	1.74876
			22.012	1.38069
			12.37	0.775903
			14.507	0.909945
			17.037	1.06864
			25.907	1.62501
			12.894	0.80877
			17.557	1.10125
			13.739	0.861773
			16.486	1.03408
			15.615	0.979444
			19.167	1.20224
			12.905	0.80946
			14.779	0.927006
			15.674	0.983145
			7.6	0.476707
			9.658	0.605794
			12.676	0.795096
			21.724	1.36263
			14.808	0.928825
			16.547	1.0379
			12.935	0.811342
			9.632	0.604163
			14.832	0.930331
			5.904	0.370326
			16.312	1.02316
			10.26	0.643554
			17.487	1.09686
			13.75	0.862463
			20.029	1.25631
			17.527	1.09937
			7.307	0.458328
			23.471	1.47221
			10.532	0.660615
			5.415	0.339653
			11.368	0.713053
			4.279	0.268398
			7.759	0.48668
			21.77	1.36551
			17.13	1.07447
			13.587	0.852239
			12.044	0.755455
			11.363	0.712739
			7.746	0.485864
			12.52	0.785311
			10.942	0.686332
			13.759	0.863027
			26.563	1.66615
			9.086	0.569915
			8.517	0.534225
			9.304	0.583589
			10.58	0.663626
			10.56	0.662371
			14.696	0.9218
			13.215	0.828905
			14.223	0.892131
			12.022	0.754075
			9.216	0.578069
			4.482	0.281131
			13.224	0.829469
			7.045	0.441894
			6.039	0.378794
			30.025	1.8833
			15.682	0.983646
			21.572	1.35309
			7.194	0.45124
			19.213	1.20513
			12.932	0.811154
			17.799	1.11643
			11.804	0.740401
			6.808	0.427029
			26.408	1.65643
			7.305	0.458203
			13.056	0.818932
			15.244	0.956173
			7.601	0.476769
			8.741	0.548275
			11.789	0.73946
			19.536	1.22539
			12.681	0.79541
			25.405	1.59352
			23.244	1.45797
			18.683	1.17188
			7.595	0.476393
			18.279	1.14654
			22.274	1.39713
			16.684	1.0465
			14.206	0.891065
			20.126	1.26239
			15.898	0.997195
			14.618	0.916908
			8.95	0.561385
			24.215	1.51888
			9.191	0.576501
			20.765	1.30248
			23.443	1.47045
			9.917	0.622039
			24.841	1.55814
			16.658	1.04487
			21.788	1.36664
			16.957	1.06362
			20.177	1.26559
			16.032	1.0056
			29.355	1.84128
			16.999	1.06625
			26.545	1.66502
			21.368	1.3403
			8.733	0.547774
			24.815	1.55651
			19.567	1.22733
			9.287	0.582523
			15.442	0.968593
			18.538	1.16279
			15.429	0.967777
			7.005	0.439385
			18.92	1.18675
			19.216	1.20532
			12.662	0.794218
			22.718	1.42498
			8.885	0.557308
			10.817	0.678491
			9.154	0.574181
			17.814	1.11738
			32.366	2.03014
			8.865	0.556053
			19.166	1.20218
			28.596	1.79367
			27.729	1.73929
			14.301	0.897024
			35.665	2.23707
			18.623	1.16812
			25.452	1.59647
			15.408	0.96646
			13.403	0.840697
			9.566	0.600023
			10.324	0.647568
			30.682	1.92451
			12.735	0.798797
			28.037	1.75861
			25.428	1.59496
			11.605	0.727918
			10.711	0.671843
			12.701	0.796665
			11.744	0.736637
			14.32	0.898216
			13.966	0.876011
			28.103	1.76275
			12.775	0.801306
			10.746	0.674038
			10.305	0.646377
			13.915	0.872812
			23.257	1.45878
			11.653	0.730929
			26.148	1.64012
			16.939	1.06249
			15.287	0.95887
			32.742	2.05373
			28.967	1.81694
			7.553	0.473759
			31.704	1.98862
			6.836	0.428785
			12.516	0.785061
			17.579	1.10263
			20.204	1.26729
			28.037	1.75861
			19.944	1.25098
			14.043	0.880841
			14.078	0.883036
			31.164	1.95475
			22.596	1.41732
			12.419	0.778976
			12.478	0.782677
			23.294	1.46111
			16.013	1.00441
			26.072	1.63535
			15.687	0.98396
			12.502	0.784182
			18.733	1.17502
			23.442	1.47039
			13.561	0.850608
			19.158	1.20168
			7.476	0.468929
			19.395	1.21654
			26.346	1.65254
			26.075	1.63554
			14.709	0.922615
			17.485	1.09674
			17.324	1.08664
			16.434	1.03082
			18.279	1.14654
			27.743	1.74017
			14.363	0.900913
			16.958	1.06368
			23.518	1.47516
			16.146	1.01275
			11.172	0.700759
			29.183	1.83049
			14.027	0.879837
			28.275	1.77354
			9.911	0.621663
			28.259	1.77253
			24.698	1.54917
			18.179	1.14027
			16.764	1.05151
			27.088	1.69908
			18.026	1.13067
			15.185	0.952472
			14.635	0.917974
			10.278	0.644683
			14.463	0.907185
			13.682	0.858197
			17.742	1.11286
			21.543	1.35128
			14.729	0.92387
			7.563	0.474386
			16.042	1.00623
			12.66	0.794093
			16.314	1.02329
			17.368	1.0894
			7.539	0.47288
			29.532	1.85238
			24.907	1.56228
			15.761	0.988602
			17.962	1.12666
			17.9	1.12277
			10.887	0.682882
			13.549	0.849855
			16.385	1.02774
			15.996	1.00334
			10.745	0.673975
			7.278	0.456509
			31.898	2.00079
			14.361	0.900787
			15.889	0.99663
			16.995	1.066
			15.006	0.941245
			15.342	0.96232
			6.855	0.429977
			16.197	1.01595
			11.769	0.738205
			12.628	0.792086
			13.773	0.863905
			19.924	1.24972
			11.016	0.690974
			29.169	1.82961
			17.81	1.11712
			13.221	0.829281
			15.5	0.972231
			14.107	0.884855
			27.53	1.72681
			23.424	1.46926
			27.73	1.73935
			18.489	1.15971
			19.487	1.22231
			9.418	0.59074
			18.028	1.1308
			17.194	1.07849
			19.91	1.24885
			29.18	1.8303
			21.999	1.37988
			19.166	1.20218
			25.453	1.59653
			16.89	1.05942
			19.237	1.20663
			22.642	1.42021
			20.15	1.2639
			23.593	1.47986
			17.672	1.10847
			23.802	1.49297
			15.496	0.97198
			11.423	0.716503
			19.68	1.23442
			15.967	1.00152
			14.994	0.940492
			8.12	0.509323
			22.977	1.44122
			13.099	0.821629
			10.825	0.678993
			11.172	0.700759
			19.75	1.23881
			14.584	0.914775
			16.438	1.03107
			14.339	0.899407
			12.319	0.772704
			13.594	0.852678
			27.6	1.7312
			25.87	1.62268
			17.113	1.07341
			19.527	1.22482
			16.439	1.03113
			4.95	0.310487
			16.761	1.05133
			28.762	1.80408
			20.381	1.27839
			14.93	0.936478
			19.686	1.2348
			9.879	0.619656
			3.127	0.19614
			18.953	1.18882
			15.547	0.975179
			19.703	1.23586
			28.644	1.79668
			26.272	1.6479
			29.608	1.85715
			19.832	1.24395
			19.431	1.2188
			11.131	0.698187
			27.447	1.7216
			9.287	0.582523
			21.313	1.33685
			22.35	1.40189
			16.66	1.04499
			11.342	0.711422
			22.498	1.41118
			38.428	2.41038
			12.019	0.753886
			34.588	2.16952
			15.218	0.954542
			16.273	1.02072
			25.38	1.59195
			23.242	1.45784
			20.554	1.28924
			27.114	1.70071
			28.205	1.76915
			12.792	0.802372
			7.494	0.470058
			22.438	1.40741
			24.67	1.54741
			15.539	0.974677
			21.179	1.32844
			23.207	1.45565
			16.104	1.01012
			22.489	1.41061
			18.49	1.15978
			30.879	1.93687
			26.782	1.67989
			28.686	1.79932
			21.698	1.361
			25.199	1.5806
			31.047	1.94741
			27.881	1.74882
			21.689	1.36043
			22.203	1.39267
			30.011	1.88243
			33.878	2.12498
			48.059	3.01448
			12.136	0.761225
			35.601	2.23306
			22.363	1.40271
			19.699	1.23561
			29.306	1.83821
			12.696	0.796351
			25.212	1.58141
			37.247	2.3363
			24.553	1.54008
			4.925	0.308918
			7.353	0.461214
			13.761	0.863153
			13.853	0.868923
			22.396	1.40478
			8.38	0.525632
			7.982	0.500667
			12.115	0.759908
			24.858	1.55921
			25.888	1.62381
			13.944	0.874631
			12.774	0.801243
			14.542	0.91214
			29.159	1.82899
			10.225	0.641359
			22.425	1.4066
			15.9427																		33.7024

## Sheet: F5H
pSMAD1/5 level analysis of hESCs cultured in YSLC conditioned medium in 3D																																				LEF1 level analysis of hESCs cultured in YSLC conditioned medium in 3D
units= fluorescence intensity (a.u.)
			Exp 1	25.0728	1			7.26124	0.289606			Exp 2	114.689	1			118.577	1.03391			Exp 3	20.2999	1			7.35499	0.362316									Exp 1	24.328	1			5.41276	0.222491			Exp 2	29.9694	1
			Control	pSMAD1/5/9	rel pSMAD1/5/9		+YSLC CM	pSMAD1/5/9	rel pSMAD1/5/9			Control	pSMAD1/5/9	rel pSMAD1/5/9		+YSLC CM	pSMAD1/5/9	rel pSMAD1/5/9			Control	pSMAD1/5/9	rel pSMAD1/5/9		+YSLC CM	pSMAD1/5/9	rel pSMAD1/5/9					pSMAD1/5/9				Control	LEF1	rel LEF1		+YSLC CM	LEF1	rel LEF1			Control	LEF1	rel LEF1		+YSLC CM
				21.142	0.843224			5.5	0.219361				157.182	1.37051			104.026	0.907028				41.171	2.02814			5.485	0.270198					hESCs	+YSLC CM				28.438	1.16894			6.58	0.27047				67.43	2.24996
				22.454	0.895551			5.157	0.205681				103.147	0.899364			104.901	0.914657				47.999	2.36449			5.014	0.246996				Number of values	2563	1660				42.817	1.75999			2.66	0.109339				24.394	0.813963
				22.222	0.886298			11.184	0.446061				151.017	1.31675			97.675	0.851652				47.533	2.34154			11.305	0.556899										28.036	1.15242			9.059	0.372369				31.079	1.03702
				20.479	0.816781			5.997	0.239183				158.467	1.38171			117.98	1.0287				58.508	2.88218			5.965	0.293844				Minimum	0.1441	0.05705				36.255	1.49026			7.954	0.326948				27.214	0.908059
				17.81	0.710331			5.02	0.200217				124.943	1.08941			191.055	1.66585				39.278	1.93488			4.853	0.239065				25% Percentile	0.7587	0.2558				20.489	0.842197			8.758	0.359996				33.688	1.12408
				22.771	0.908195			5.674	0.226301				133.402	1.16316			135.632	1.18261				45.571	2.24489			5.85	0.288178				Median	0.9839	0.2983				26.821	1.10247			10.679	0.438959				22.118	0.738019
				22.163	0.883945			6.827	0.272287				51.105	0.445597			147.074	1.28237				39.261	1.93405			6.635	0.326849				75% Percentile	1.213	0.365				17.582	0.722705			9.807	0.403115				32.144	1.07256
				19.068	0.760505			6.634	0.264589				97.179	0.847327			116.384	1.01478				52.108	2.56691			6.653	0.327735				Maximum	5.081	7.518				24.455	1.00522			1.633	0.0671242				30.349	1.01267
				21.982	0.876726			8.786	0.350419				155.709	1.35766			121.413	1.05863				34.801	1.71434			8.957	0.441233										23.105	0.949728			11.141	0.457949				16.513	0.550995
				19.91	0.794087			5.569	0.222113				143.233	1.24888			144.573	1.26057				38.703	1.90656			5.52	0.271922				Mean	1	0.4195				16.908	0.695001			8.379	0.344418				24.833	0.828611
				21.641	0.863126			5.533	0.220677				75.02	0.654117			159.639	1.39193				40.12	1.97636			5.838	0.287587				Std. Deviation	0.4005	0.4111				14.342	0.589526			10.266	0.421982				27.16	0.906257
				19.596	0.781563			5.837	0.232802				157.525	1.3735			112.725	0.982876				45.038	2.21863			5.93	0.292119				Std. Error of Mean	0.00791	0.01009				12.141	0.499054			6.905	0.283829				40.069	1.337
				19.79	0.789301			5.995	0.239104				89.869	0.78359			119.786	1.04444				32.435	1.59779			7.923	0.390297										13.662	0.561574			7.903	0.324852				28.895	0.964149
				22.195	0.885221			6.347	0.253143				156.79	1.36709			112.892	0.984333				36.711	1.80843			6.356	0.313105				Lower 95% CI of mean	0.9845	0.3997				17.069	0.701619			6.615	0.271909				36.34	1.21257
				16.781	0.66929			5.22	0.208194				146.609	1.27832			164.119	1.43099				39.567	1.94912			5.335	0.262809				Upper 95% CI of mean	1.016	0.4393				21.282	0.874793			3.455	0.142017				22.269	0.743057
				21.164	0.844101			5.432	0.216649				91.878	0.801106			99.069	0.863807				41.527	2.04567			5.404	0.266208										19.797	0.813753			7.115	0.292461				28.913	0.96475
				24.016	0.95785			6.77	0.270013				122.612	1.06908			97.856	0.85323				30.407	1.49789			6.668	0.328474				Sum	2563	696.3				17.517	0.720034			5.487	0.225542				28.979	0.966952
				16.813	0.670567			7.952	0.317156				148.767	1.29714			93.514	0.815371				32.17	1.58474			7.916	0.389952										18.836	0.774251			7.136	0.293324				45.561	1.52025
				18.945	0.755599			7.947	0.316957				82.563	0.719887			109.861	0.957905				36.816	1.8136			7.476	0.368277				D'Agostino & Pearson normality test						14.551	0.598117			5.707	0.234585				54.251	1.81021
				18.997	0.757673			6.7	0.267222				79.771	0.695543			106.842	0.931581				35.945	1.7707			6.653	0.327735				K2	674.1	2400				21.668	0.89066			7.6	0.312397				23.438	0.782064
				22.738	0.906878			7.489	0.29869				127.074	1.10799			97.376	0.849045				33.746	1.66237			7.878	0.38808				P value	<0.0001	<0.0001				40.904	1.68135			7.025	0.288762				69.879	2.33168
				23.988	0.956733			7.332	0.292428				70.065	0.610914			115.247	1.00487				28.802	1.41882			7.278	0.358524				Passed normality test (alpha=0.05)?	No	No				21.082	0.866572			6.293	0.258673				45.779	1.52752
				18.372	0.732746			7.237	0.288639				182.875	1.59453			183.627	1.60109				26.081	1.28478			7.251	0.357194				P value summary	****	****				32.343	1.32945			9.526	0.391565				59.286	1.97822
				8.509	0.339371			7.954	0.317236				126.985	1.10721			130.508	1.13793				34.844	1.71646			7.914	0.389854										29.028	1.19319			2.123	0.0872656				69.272	2.31142
				17.509	0.698326			8.579	0.342163				95.739	0.834771			148.591	1.2956				35.214	1.73469			8.28	0.407883										24.494	1.00682			8.419	0.346062				17.313	0.577689
				21.802	0.869547			5.976	0.238346				141.046	1.22981			109.181	0.951975				36.024	1.77459			6.066	0.298819										25.449	1.04608			10.763	0.442411				54.632	1.82292
				17.2	0.686002			7.452	0.297214				132.75	1.15748			121.108	1.05597				36.784	1.81203			7.315	0.360346				Column B	+YSLC CM					24.2	0.994737			4.46	0.183328				27.256	0.90946
				15.331	0.611459			6.498	0.259165				172.49	1.50398			143.271	1.24921				29.844	1.47015			6.413	0.315913				vs.	vs.					11.413	0.46913			8.475	0.348364				52.019	1.73574
				18.247	0.72776			5.303	0.211504				96.743	0.843526			149.529	1.30378				34.422	1.69567			6.447	0.317587				Column A	hESC					14.651	0.602227			1.933	0.0794557				34.189	1.1408
				16.435	0.655491			6.37	0.25406				75.045	0.654335			110.792	0.966022				37.071	1.82616			6.275	0.309115										24.295	0.998642			3.729	0.15328				64.445	2.15036
				18.482	0.737133			6.279	0.250431				130.117	1.13452			120.07	1.04692				34.822	1.71538			6.386	0.314583				Mann Whitney test						12.588	0.517428			2.226	0.0914994				24.665	0.823005
				17.735	0.70734			6.289	0.250829				130.609	1.13881			165.971	1.44714				37.308	1.83784			6.982	0.343942				P value	<0.0001					43.07	1.77039			3.167	0.130179				16.164	0.53935
				13.545	0.540226			6.907	0.275478				145.47	1.26839			106.424	0.927937				31.872	1.57006			6.723	0.331184				Exact or approximate P value?	Approximate					26.952	1.10786			8.856	0.364025				22.5	0.750765
				21.974	0.876407			6.691	0.266863				110.894	0.966912			104.314	0.909539				38.115	1.87759			7.592	0.373992				P value summary	****					35.474	1.45815			9.972	0.409898				32.086	1.07062
				17.241	0.687637			7.55	0.301123				70.141	0.611576			95.097	0.829174				35.764	1.76178			5.947	0.292957				Significantly different (P < 0.05)?	Yes					48.39	1.98906			10.467	0.430244				31.927	1.06532
				17.098	0.681934			5.916	0.235953				141.036	1.22973			120.544	1.05105				34.201	1.68479			9.68	0.476849				One- or two-tailed P value?	Two-tailed					37.246	1.53099			4.67	0.19196				26.456	0.882766
				19.184	0.765131			6.78	0.270412				115.927	1.0108			103.912	0.906034				48.096	2.36927			6.837	0.336799				Sum of ranks in column A,B	7118658 , 1800318					40.907	1.68148			8.269	0.339896				11.565	0.385893
				18.449	0.735817			7.193	0.286884				103.653	0.903776			113.11	0.986233				36.409	1.79355			6.981	0.343893				Mann-Whitney U	421688					36.998	1.5208			7.881	0.323947				26.854	0.896046
				17.782	0.709214			6.713	0.26774				151.148	1.3179			111.127	0.968943				39.338	1.93784			6.698	0.329952										25.538	1.04974			8.168	0.335744				24.95	0.832515
				16.728	0.667177			7.381	0.294383				60.539	0.527854			116.445	1.01531				28.357	1.3969			7.331	0.361134				Difference between medians						39.567	1.6264			8.273	0.34006				37.325	1.24544
				15.617	0.622866			6.762	0.269694				144.024	1.25578			132.761	1.15758				34.175	1.6835			6.913	0.340543				Median of column A	0.9839, n=2563					48.693	2.00152			8.24	0.338704				37.602	1.25468
				16.191	0.645759			11.628	0.463769				105.171	0.917011			120.679	1.05223				31.727	1.56291			6.838	0.336849				Median of column B	0.2983, n=1660					58.738	2.41442			6.841	0.281198				22.026	0.734949
				14.079	0.561524			6.863	0.273723				113.81	0.992337			124.798	1.08814				43.401	2.13799			11.405	0.561825				Difference: Actual	-0.6856					25.197	1.03572			6.106	0.250986				31.913	1.06485
				14.871	0.593112			8.03	0.320267				123.655	1.07818			112.804	0.983565				34.025	1.67612			6.921	0.340937				Difference: Hodges-Lehmann	-0.6271					27.883	1.14613			7.728	0.317658				14.946	0.498708
				14.089	0.561923			9.141	0.364578				172.08	1.50041			98.398	0.857956				37.561	1.8503			8.063	0.397194										18.414	0.756905			6.347	0.260892				10.348	0.345285
				13.776	0.54944			5.776	0.230369				129.115	1.12578			109.516	0.954896				27.352	1.34739			9.144	0.450445										16.421	0.674983			7.662	0.314945				33.945	1.13265
				16.712	0.666538			19.463	0.776259				117.636	1.0257			100.63	0.877417				27.472	1.35331			5.705	0.281036										27.942	1.14855			15.158	0.623067				22.905	0.764279
				14.125	0.563359			6.577	0.262316				160.817	1.4022			110.873	0.966728				30.771	1.51582			6.18	0.304435										8.539	0.350994			5.784	0.23775				13.93	0.464807
				16.598	0.661992			7.397	0.295021				128.836	1.12335			106.722	0.930535				31.192	1.53656			19.026	0.937245										25.094	1.03149			7.105	0.29205				22.502	0.750832
				12.141	0.484229			6.323	0.252185				104.301	0.909426			131.184	1.14382				25.45	1.2537			7.41	0.365026										18.467	0.759083			6.999	0.287693				23.722	0.79154
				16.781	0.66929			6.714	0.26778				139.445	1.21585			133.902	1.16752				22.085	1.08794			6.035	0.297292										20.641	0.848445			6.461	0.265578				27.087	0.903821
				18.91	0.754203			6.886	0.27464				100.37	0.87515			114.143	0.99524				28.358	1.39695			6.538	0.32207										4.517	0.185671			6.511	0.267634				39.345	1.31284
				13.691	0.546049			7.053	0.281301				113.89	0.993034			181.932	1.58631				33.009	1.62607			6.804	0.335174										26.972	1.10868			6.319	0.259742				23.092	0.770519
				21.287	0.849007			12.798	0.510433				121.508	1.05946			147.667	1.28754				24.424	1.20316			6.931	0.34143										34.647	1.42416			6.965	0.286295				29.793	0.994113
				10.126	0.403864			6.66	0.265626				154.43	1.34651			151.27	1.31896				29.956	1.47567			12.095	0.595815										32.523	1.33685			6.106	0.250986				36.541	1.21928
				9.774	0.389824			6.525	0.260242				130.615	1.13886			153.266	1.33636				28.709	1.41424			6.713	0.330691										10.258	0.421654			5.189	0.213293				23.421	0.781496
				11.197	0.446579			7.27	0.289955				142.733	1.24452			145.138	1.26549				37.483	1.84646			6.599	0.325075										16.482	0.67749			6.742	0.277129				24.032	0.801884
				10.267	0.409487			4.381	0.174731				155.295	1.35405			150.818	1.31502				35.682	1.75774			7.178	0.353597										5.36	0.220322			7.806	0.320864				25.681	0.856907
				11.293	0.450408			6.258	0.249593				77.551	0.676186			155.736	1.3579				34.773	1.71296			7.508	0.369854										22.86	0.939657			8.649	0.355516				19.71	0.65767
				12.556	0.500781			7.131	0.284412				104.851	0.914221			164.052	1.43041				31.562	1.55478			6.265	0.308622										20.736	0.85235			4.282	0.176011				37.185	1.24076
				11.754	0.468794			7.28	0.290354				103.366	0.901273			207.56	1.80977				29.649	1.46055			4.27	0.210346										17.69	0.727145			2.946	0.121095				48.015	1.60213
				33.942	1.35374			4.165	0.166116				111.734	0.974236			122.183	1.06534				35.405	1.7441			7.629	0.375814										37.614	1.54612			3.663	0.150567				19.647	0.655568
				39.649	1.58135			8.177	0.32613				128.811	1.12313			129.185	1.1264				30.772	1.51587			7.325	0.360839										27.155	1.1162			2.625	0.1079				38.417	1.28187
				38.141	1.52121			5.866	0.233959				93.955	0.819216			125.169	1.09138				29.174	1.43715			4.054	0.199705										22.166	0.91113			4.76	0.195659				20.911	0.697744
				57.092	2.27705			4.658	0.185779				80.568	0.702492			131.942	1.15043				58.632	2.88829			8.156	0.401775										33.836	1.39082			3.67	0.150855				26.277	0.876793
				28.785	1.14806			7.653	0.305231				91.215	0.795326			170.132	1.48342				22.017	1.08459			5.727	0.282119										30.027	1.23426			3.135	0.128864				34.405	1.148
				66.77	2.66304			5.174	0.206359				139.324	1.2148			182.372	1.59015				23.308	1.14818			4.717	0.232365										3.18	0.130713			3.202	0.131618				21.458	0.715996
				42.871	1.70986			4.849	0.193397				122.454	1.06771			187.024	1.63071				33.179	1.63444			7.507	0.369804										4.641	0.190768			3.671	0.150896				19.698	0.65727
				62.884	2.50805			5.607	0.223629				146.072	1.27364			168.813	1.47192				34.486	1.69882			5.737	0.282612										24.123	0.991572			2.604	0.107037				35.618	1.18848
				36.481	1.455			6.576	0.262276				152.121	1.32638			157.109	1.36987				24.172	1.19074			5.181	0.255223										33.301	1.36883			4.274	0.175682				32.886	1.09732
				53.67	2.14056			6.536	0.260681				83.512	0.728161			235.564	2.05394				32.731	1.61237			4.843	0.238572										42.635	1.75251			3.208	0.131864				25.92	0.864881
				21.852	0.871541			6.423	0.256174				107.657	0.938687			164.176	1.43149				21.906	1.07912			5.492	0.270543										25.755	1.05866			2.95	0.121259				53.146	1.77334
				26.801	1.06893			5.09	0.203009				72.213	0.629643			173.705	1.51458				22.335	1.10025			8.325	0.4101										35.042	1.4404			3.976	0.163433				34.544	1.15264
				36.709	1.4641			6.474	0.258208				120.776	1.05308			167.064	1.45667				27.486	1.354			6.528	0.321578										23.536	0.967444			3.869	0.159035				36.729	1.22555
				26.139	1.04252			6.255	0.249473				131.354	1.14531			176.925	1.54265				23.137	1.13976			6.458	0.318129										44.816	1.84215			3.925	0.161337				30.39	1.01403
				54.644	2.17941			6.412	0.255735				144.454	1.25953			181.325	1.58102				30.909	1.52262			6.439	0.317193										18.605	0.764756			4.625	0.19011				52.102	1.7385
				27.192	1.08452			6.238	0.248795				99.451	0.867137			174.487	1.52139				25.497	1.25601			5.076	0.25005										21.099	0.867271			4.738	0.194755				33.82	1.12848
				45.454	1.81288			6.028	0.24042				125.196	1.09161			111.168	0.969301				21.095	1.03917			6.391	0.314829										11.5	0.472706			3.16	0.129891				16.488	0.550161
				37.936	1.51303			5.782	0.230608				123.516	1.07697			97.159	0.847153				24.847	1.224			6.466	0.318523										26.927	1.10683			4.223	0.173586				24.323	0.811594
				32.919	1.31294			6.514	0.259803				129.642	1.13038			171.227	1.49297				24.805	1.22193			6.4	0.315272										19.452	0.799572			3.901	0.16035				20.21	0.674354
				43.883	1.75022			5.689	0.226899				117.391	1.02356			99.43	0.866954				22.957	1.13089			6.363	0.31345										21.92	0.901018			3.64	0.149622				14.313	0.477587
				33.827	1.34915			5.596	0.22319				114.26	0.996261			119.468	1.04167				18.648	0.918624			6	0.295568										24.047	0.988448			3.282	0.134906				29.936	0.998885
				26.073	1.03989			6.996	0.279027				90.83	0.791969			110.525	0.963694				22.56	1.11133			6.471	0.31877										25.573	1.05117			3.839	0.157802				20.679	0.690003
				31.444	1.25411			7.966	0.317715				105.599	0.920743			99.258	0.865454				26.837	1.32203			5.788	0.285124										18.649	0.766564			3.125	0.128453				23.813	0.794576
				30.593	1.22017			5.296	0.211225				81.293	0.708813			119.235	1.03964				17.616	0.867787			5.513	0.271577										20.015	0.822714			3.38	0.138934				13.956	0.465675
				26.344	1.0507			6.918	0.275916				122.644	1.06936			135.921	1.18513				19.764	0.9736			5.618	0.27675										20.3	0.834428			3.484	0.143209				25.577	0.853436
				34.171	1.36287			5.562	0.221834				133.398	1.16313			150.156	1.30925				44.056	2.17026			6.995	0.344583										30.046	1.23504			2.99	0.122903				38.805	1.29482
				39.321	1.56827			5.972	0.238186				110.228	0.961105			111.264	0.970138				36.741	1.80991			4.641	0.228622										18.908	0.77721			3.912	0.160802				19.505	0.65083
				33.672	1.34297			4.41	0.175888				134.183	1.16997			115.688	1.00871				35.067	1.72745			7.299	0.359558										13.194	0.542337			3.738	0.15365				29.388	0.980599
				39.287	1.56692			4.828	0.192559				107.536	0.937632			138.796	1.2102				39.203	1.93119			5.311	0.261627										24.007	0.986804			4.038	0.165981				21.138	0.705319
				30.672	1.22332			5.572	0.222233				115.158	1.00409			158.371	1.38087				24.884	1.22582			5.568	0.274287										24.116	0.991285			4.548	0.186945				23.45	0.782464
				31.991	1.27592			6.329	0.252425				105.7	0.921624			112.266	0.978874				32.029	1.57779			5.923	0.291775										22.033	0.905663			4.36	0.179217				22.874	0.763244
				46.843	1.86828			6.709	0.267581				123.524	1.07704			118.75	1.03541				33.618	1.65607			4.438	0.218622										20.298	0.834346			4.035	0.165858				36.136	1.20576
				25.687	1.0245			11.723	0.467558				77.315	0.674128			115.398	1.00618				28.875	1.42242			4.856	0.239213										25.917	1.06531			2.283	0.0938424				32.992	1.10086
				36.609	1.46011			5.31	0.211783				151.943	1.32483			179.452	1.56469				41.015	2.02045			5.805	0.285962										25.089	1.03128			4.3	0.176751				35.079	1.17049
				32.704	1.30436			5.995	0.239104				134.166	1.16983			106.435	0.928032				33.71	1.6606			6.344	0.312514										5.028	0.206675			2.462	0.1012				20.564	0.686166
				39.228	1.56456			4.788	0.190964				74.421	0.648895			109.613	0.955742				26.295	1.29533			6.577	0.323991										46.893	1.92753			5.266	0.216458				19.329	0.644957
				29.994	1.19628			5.313	0.211903				100.724	0.878237			96.329	0.839916				22.018	1.08463			11.432	0.563155										32.832	1.34955			4.219	0.173421				5.707	0.190427
				32.685	1.3036			5.37	0.214176				126.763	1.10528			97.028	0.846011				35.05	1.72661			5.18	0.255173										32.842	1.34997			5.333	0.219212				7.312	0.243982
				31.642	1.262			5.574	0.222312				114.817	1.00112			104.712	0.913009				29.149	1.43592			6.035	0.297292										29.93	1.23027			5.287	0.217321				43.714	1.45862
				35.741	1.42549			5.885	0.234716				146.235	1.27506			96.597	0.842253				36.172	1.78188			4.65	0.229065										8.922	0.366737			4.475	0.183944				28.611	0.954673
				30.023	1.19743			5.672	0.226221				127.627	1.11281			121.836	1.06232				23.764	1.17065			5.479	0.269903										22.991	0.945042			4.797	0.19718				48.306	1.61184
				29.941	1.19416			3.798	0.151479				97.11	0.846726			126.314	1.10136				24.189	1.19158			5.36	0.26404										23.579	0.969211			3.303	0.135769				24.35	0.812495
				31.973	1.27521			6.201	0.24732				158.211	1.37948			106.855	0.931695				28.176	1.38799			5.632	0.27744										3.959	0.162734			4.874	0.200345				33.577	1.12038
				34.268	1.36674			5.386	0.214814				129.654	1.13048			139.567	1.21692				20.99	1.03399			6.024	0.29675										13.795	0.567041			4.263	0.17523				29.587	0.987239
				33.382	1.3314			8.151	0.325093				123.046	1.07287			155.614	1.35684				32.225	1.58744			5.601	0.275912										28.793	1.18353			5.852	0.240546				35.159	1.17316
				30.028	1.19763			5.351	0.213418				62.529	0.545205			113.64	0.990855				31.339	1.5438			3.763	0.18537										21.477	0.882809			6.416	0.263729				24.431	0.815197
				27.988	1.11627			5.459	0.217726				124.2	1.08293			117.174	1.02167				43.663	2.1509			6.218	0.306307										29.472	1.21144			5.423	0.222912				14.595	0.486996
				15.681	0.625418			16.028	0.639258				135.142	1.17834			110.24	0.961209				38.324	1.88789			5.575	0.274632										36.503	1.50045			6.05	0.248684				19.329	0.644957
				15.57	0.620991			5.327	0.212461				104.735	0.91321			101.819	0.887784				38.507	1.8969			8.076	0.397834										15.49	0.636714			5.117	0.210334				29.258	0.976262
				33.437	1.3336			5.29	0.210985				115.831	1.00996			93.789	0.817769				37.263	1.83562			5.372	0.264632										21.677	0.89103			4.954	0.203633				22.674	0.756571
				22.521	0.898224			5.387	0.214854				130.736	1.13992			121.622	1.06045				24.713	1.21739			15.882	0.782368										29.62	1.21753			5.608	0.230516				30.704	1.02451
				13.612	0.542899			4.992	0.1991				151.356	1.31971			100.341	0.874897				29.478	1.45212			5.293	0.26074										38.197	1.57008			4.828	0.198454				25.634	0.855338
				25.362	1.01153			5.646	0.225184				102.378	0.892658			118.833	1.03613				23.969	1.18074			5.134	0.252907										15.914	0.654143			5.189	0.213293				26.471	0.883267
				11.003	0.438842			6.361	0.253701				132.242	1.15305			106.417	0.927876				27.253	1.34252			6.095	0.300248										35.423	1.45606			2.489	0.10231				27.191	0.907291
				10.221	0.407653			5.997	0.239183				166.011	1.44749			116.737	1.01786				30.25	1.49015			5.272	0.259705										32.988	1.35597			3.504	0.144031				27.148	0.905856
				15.743	0.627891			5.463	0.217885				97.538	0.850457			132.053	1.1514				25.393	1.25089			4.847	0.238769										15.907	0.653855			5.092	0.209306				23.901	0.797513
				16.456	0.656328			4.515	0.180075				134.676	1.17427			126.079	1.09931				25.526	1.25744			5.736	0.282563										29.258	1.20265			4.131	0.169804				31.603	1.05451
				19.061	0.760226			5.512	0.21984				149.172	1.30067			122.068	1.06434				30.896	1.52198			5.483	0.2701										19.723	0.810711			4.686	0.192617				20.543	0.685465
				23.132	0.922593			7.119	0.283933				137.373	1.19779			97.405	0.849298				17.897	0.881629			6.028	0.296947										17.875	0.734749			6.164	0.25337				15.951	0.532242
				20.957	0.835845			6.817	0.271888				128.348	1.1191			110.222	0.961052				24.867	1.22498			5.49	0.270444										15.892	0.653238			4.71	0.193604				30.256	1.00956
				22.66	0.903767			5.127	0.204484				141.102	1.2303			106.571	0.929218				17.737	0.873747			4.377	0.215617										26.499	1.08924			2.688	0.11049				28.856	0.962848
				21.276	0.848568			4.399	0.175449				100.46	0.875935			95.505	0.832731				18.968	0.934388			5.544	0.273105										21.269	0.874259			3.411	0.140209				4.869	0.162466
				22.953	0.915453			6.859	0.273563				155.263	1.35378			112.274	0.978944				42.522	2.09469			7.119	0.350691										22.767	0.935834			4.173	0.171531				51.911	1.73213
				20.884	0.832934			6.301	0.251308				120.856	1.05377			101.489	0.884907				15.299	0.753648			6.805	0.335223										12.488	0.513317			5.713	0.234832				31.946	1.06595
				18.547	0.739725			5.138	0.204923				145.846	1.27167			130.626	1.13896				20.066	0.988477			5.343	0.263203										22.57	0.927736			5.442	0.223693				25.926	0.865082
				22.014	0.878002			6.049	0.241257				124.085	1.08193			110.87	0.966702				11.854	0.583943			4.322	0.212907										18.919	0.777663			4.41	0.181272				76.661	2.55797
				20.765	0.828188			6.386	0.254698				155.412	1.35507			179.793	1.56766				17.369	0.855619			6.929	0.341331										28.443	1.16915			5.994	0.246382				55.418	1.84915
				23.73	0.946443			5.011	0.199858				154.218	1.34466			147.034	1.28202				15.088	0.743254			6.325	0.311578										33.835	1.39078			5.576	0.229201				8.259	0.275581
				19.437	0.775222			6.12	0.244089				153.697	1.34012			146.908	1.28093				12.782	0.629658			6.037	0.29739										25.894	1.06437			5.048	0.207497				29.52	0.985004
				18.186	0.725327			4.693	0.187175				151.693	1.32265			144.17	1.25705				9.633	0.474534			4.992	0.245912										18.482	0.7597			4.349	0.178765				25.797	0.860777
				9.938	0.396365			7.552	0.301203				19.122	0.166729			140.216	1.22258				12.053	0.593746			6.337	0.312169										17.198	0.706921			4.577	0.188137				24.064	0.802952
				16.684	0.665422			6.324	0.252225				120.338	1.04926			142.721	1.24442				9.67	0.476357			4.892	0.240986														5.895	0.242313				5.614	0.187324
				15.976	0.637184			6.287	0.25075				88.387	0.770668			140.848	1.22809				10.584	0.521381			5.948	0.293006														6.202	0.254932				30.393	1.01413
				18.012	0.718387			6.127	0.244368				154.353	1.34584			142.065	1.2387				11.724	0.577539			4.671	0.230099														5.511	0.226529				35.798	1.19448
				20.03	0.798873			7.757	0.309379				129.346	1.1278			104.026	0.907028				13.924	0.685914			7.815	0.384977														4.622	0.189987				31.822	1.06182
				18.367	0.732546			6.186	0.246721				119.404	1.04111			92.586	0.80728				9.207	0.453549			6.167	0.303794														5.298	0.217773				6.857	0.2288
				24.594	0.980903			6.56	0.261638				106.564	0.929157			179.716	1.56699				10.992	0.54148			6.327	0.311676														4.831	0.198578				38.592	1.28771
				17.265	0.688594			5.882	0.234597				71.078	0.619746			105.238	0.917596				11.388	0.560987			5.958	0.293499														4.408	0.18119				32.186	1.07396
				16.211	0.646557			6.218	0.247998				119.791	1.04449			123.274	1.07486				10.814	0.532712			6.107	0.300839														3.967	0.163063				25.158	0.839455
				15.095	0.602046			10.766	0.429389				120.263	1.0486			109.378	0.953693				11.316	0.557441			7.703	0.37946														4.546	0.186863				26.362	0.87963
				16.293	0.649827			5.765	0.22993				96.158	0.838425			98.826	0.861688				10.719	0.528032			6.033	0.297193														4.695	0.192987				27.975	0.933451
				12.857	0.512786			6.694	0.266982				123.571	1.07745			120.047	1.04672				10.103	0.497687			5.474	0.269656														5.313	0.21839				45.069	1.50383
				14.78	0.589483			7.003	0.279306				121.173	1.05654			128.369	1.11928				9.495	0.467736			6.595	0.324878														4.635	0.190521				33.241	1.10916
				16.229	0.647275			6.953	0.277312				102.233	0.891394			146.518	1.27753				9.076	0.447095			5.863	0.288819														4.439	0.182464				36.142	1.20596
				14.403	0.574447			4.622	0.184343				93.196	0.812598			113.344	0.988274				9.343	0.460248			6.414	0.315962														4.443	0.182629				35.227	1.17543
				17.297	0.68987			5.338	0.2129				108.763	0.948331			117	1.02015				11.119	0.547736			10.635	0.523894														3.922	0.161213				54.485	1.81802
				18.948	0.755719			6.137	0.244767				78.62	0.685507			135.789	1.18398				9.016	0.44414			5.711	0.281331														5.533	0.227433				15.456	0.515726
				12.231	0.487819			5.182	0.206678				115.934	1.01086			158.015	1.37777				8.598	0.423549			6.749	0.332464														6.531	0.268456				27.962	0.933017
				14.79	0.589882			6.261	0.249713				106.292	0.926786			111.107	0.968769				8.885	0.437686			6.994	0.344533														5.526	0.227145				38.53	1.28564
				8.989	0.358516			5.01	0.199818				100.446	0.875813			121.218	1.05693				10.378	0.511234			6.785	0.334238														4.441	0.182547				25.956	0.866083
				8.596	0.342841			6.14	0.244887				105.719	0.921789			115.415	1.00633				18.275	0.90025			4.734	0.233203														5.184	0.213088				33.248	1.1094
				10.399	0.414752			6.3	0.251268				126.937	1.10679			101.813	0.887732				8.913	0.439066			5.216	0.256947														3.503	0.14399				36.03	1.20223
				11.582	0.461934			6.692	0.266903				75.321	0.656742			127.309	1.11004				8.354	0.411529			6.113	0.301134														4.022	0.165324				24.499	0.817466
				7.648	0.305031			5.844	0.233081				142.226	1.2401			84.466	0.736479				8.903	0.438573			4.864	0.239607														4.863	0.199893				34.368	1.14677
				9.333	0.372236			6.735	0.268618				155.047	1.35189			94.111	0.820577				8.654	0.426307			6.275	0.309115														4.168	0.171325				16.775	0.559737
				8.921	0.355804			6.419	0.256014				137.577	1.19957			93.68	0.816819				9.072	0.446898			4.978	0.245223														1.478	0.060753				31.284	1.04386
				15.295	0.610023			6.072	0.242175				103.374	0.901343			98.315	0.857232				9.622	0.473992			6.117	0.301331														3.919	0.16109				34.588	1.15411
				21.788	0.868989			6.361	0.253701				96.122	0.838111			100.113	0.872909				7.827	0.385568			5.155	0.253942														4.718	0.193933				31.236	1.04226
				8.017	0.319749			6.6	0.263233				120.452	1.05025			113.88	0.992947				9.033	0.444977			5.714	0.281479														4.894	0.201167				31.588	1.05401
				8.944	0.356721			6.861	0.273643				139.895	1.21978			102.05	0.889799				9.971	0.491184			6.272	0.308967														5.009	0.205894				27.096	0.904121
				8.931	0.356202			6.713	0.26774				145.689	1.2703			97.699	0.851861				9.84	0.484731			6.661	0.328129														2.944	0.121013				24.321	0.811527
				8.877	0.354049			5.928	0.236431				127.368	1.11055			90.757	0.791332				10.089	0.496997			7.602	0.374484														3.117	0.128124				33.113	1.10489
				10.716	0.427395			6.801	0.27125				92.539	0.80687			103.125	0.899172				36.58	1.80198			12.816	0.631333														6.698	0.27532				32.436	1.0823
				9.316	0.371558			6.23	0.248476				161.183	1.40539			86.854	0.757301				9.198	0.453105			5.834	0.28739														5.901	0.24256				17.097	0.570481
				8.885	0.354368			6.451	0.257291				134.11	1.16934			100.441	0.875769				10.949	0.539362			6.729	0.331479														6.762	0.277951				28.006	0.934486
				11.081	0.441953			6.206	0.247519				122.793	1.07066			96.437	0.840857				10.082	0.496652			6.332	0.311922														5.192	0.213416				31.378	1.047
				11.874	0.473581			7.298	0.291072				106.673	0.930108			98.679	0.860406				9.656	0.475667			6.058	0.298425														6.593	0.271004				39.022	1.30206
				9.501	0.378936			5.813	0.231845				126.815	1.10573			98.883	0.862185				28.805	1.41897			6.214	0.30611														6.033	0.247986				26.028	0.868485
				8.141	0.324694			7.092	0.282856				145.383	1.26763			114.37	0.99722				103.153	5.08145			6.7	0.330051														6.181	0.254069				59.65	1.99036
				8.193	0.326768			19.525	0.778732				167.054	1.45658			99.494	0.867512				25.338	1.24818			6.719	0.330987														6.783	0.278814				57.394	1.91508
				10.075	0.40183			5.736	0.228774				135.858	1.18458			124.546	1.08595				30.376	1.49636			6.679	0.329016														5.719	0.235079				26.41	0.881231
				7.531	0.300365			5.42	0.21617				98.908	0.862403			136.104	1.18672				23.323	1.14892			5.916	0.29143														5.825	0.239436				65.762	2.1943
				8.875	0.353969			2.931	0.116899				136.047	1.18623			134.157	1.16975				30.878	1.52109			6.791	0.334533														4.306	0.176997				29.923	0.998451
				6.762	0.269694			5.214	0.207954				138.141	1.20448			101.769	0.887348				34.316	1.69045			6.257	0.308228														8.345	0.34302				36.688	1.22418
				6.348	0.253183			4.629	0.184622				154.187	1.34439			89.264	0.778314				18.278	0.900398			6.531	0.321725														5.813	0.238942				46.268	1.54384
				7.699	0.307066			4.929	0.196587				138.712	1.20946			104.708	0.912974				24.06	1.18523			6.148	0.302858														7.926	0.325797				39.956	1.33323
				7.67	0.305909			6.561	0.261678				147.744	1.28822			88.857	0.774766				16.618	0.818624			7.338	0.361479														4.196	0.172476				34.632	1.15558
				7.319	0.29191			6.183	0.246602				146.359	1.27614			98.566	0.859421				19.659	0.968428			5.815	0.286454														6.683	0.274704				30.781	1.02708
				6.747	0.269096			4.974	0.198382				142.37	1.24136			86.28	0.752296				12.868	0.633894			12.76	0.628574														4.385	0.180245				45.38	1.51421
				6.45	0.257251			5.666	0.225982				104.008	0.906871			109.318	0.95317				16.824	0.828772			18.118	0.892516														5.813	0.238942				26.671	0.88994
				9.524	0.379854			6.743	0.268937				118.139	1.03008			117.948	1.02842				14.193	0.699165			7.042	0.346898														4.068	0.167215				38.444	1.28277
				9.147	0.364817			7.35	0.293146				125.083	1.09063			86.56	0.754738				9.756	0.480593			5.765	0.283991														5.287	0.217321				57.009	1.90224
				7.521	0.299966			6.858	0.273523				156.756	1.36679			101.445	0.884523				10.471	0.515815			2.729	0.134434														6.566	0.269894				44.597	1.48808
				8.649	0.344955			6.015	0.239901				141	1.22941			93.919	0.818902				12.815	0.631283			5.125	0.252464														4.895	0.201208				22.004	0.734215
				8.1	0.323059			7.193	0.286884				123.976	1.08098			120.843	1.05366				8.115	0.399755			5.397	0.265863														7.376	0.303189				25.34	0.845528
				7.866	0.313726			6.499	0.259205				160.544	1.39982			92.444	0.806042				10.028	0.493992			7.929	0.390593														7.236	0.297435				17.161	0.572617
				6.129	0.244448			5.855	0.23352				159.749	1.39289			72.123	0.628858				8.984	0.442563			2.875	0.141626														6.486	0.266606				11.406	0.380588
				7.495	0.298929			4.6	0.183466				156.656	1.36592			78.053	0.680563				9.154	0.450938			5.129	0.252661														6.369	0.261797				35.121	1.17189
				6.674	0.266185			6.409	0.255615				156.361	1.36335			105.467	0.919592				9.656	0.475667			4.496	0.221479														7.122	0.292749				37.895	1.26446
				6.923	0.276116			4.071	0.162367				20.904	0.182267			77.838	0.678688				8.253	0.406553			4.947	0.243696														7.208	0.296284				23.406	0.780996
				8.408	0.335343			6.503	0.259365				122.044	1.06413			94.807	0.826645				8.401	0.413844			6.541	0.322218														7.559	0.310712				17.223	0.574686
				7.758	0.309419			6.633	0.264549				150.172	1.30939			9.526	0.0830595				11.311	0.557194			14.338	0.706308														6.797	0.27939				36.993	1.23436
				8.041	0.320706			5.24	0.208991				136.979	1.19435			110.327	0.961968				8.579	0.422613			6.173	0.30409														7.578	0.311493				43.048	1.4364
				8.063	0.321583			5.885	0.234716				119.63	1.04308			93.25	0.813069				10.01	0.493105			4.983	0.245469														8.323	0.342116				31.215	1.04156
				7.181	0.286406			5.315	0.211983				110.146	0.96039			101.918	0.888648				9.776	0.481578			6.856	0.337735														7.488	0.307793				21.15	0.705719
				7.527	0.300206			5.303	0.211504				93.448	0.814796			75.197	0.655661				8.471	0.417292			6.723	0.331184														4.973	0.204414				47.934	1.59943
				7.133	0.284491			6.049	0.241257				93.89	0.81865			85.87	0.748721				6.966	0.343154			7.049	0.347243														8.968	0.368628				29.191	0.974026
				8.224	0.328005			5.612	0.223828				141.189	1.23106			83.865	0.731239				9.868	0.48611			6.013	0.296208														15.492	0.636796				24.991	0.833883
				6.408	0.255576			6.637	0.264709				135.555	1.18194			83.25	0.725877				9.983	0.491775			7.273	0.358277														3.302	0.135728				30.271	1.01006
				7.606	0.303356			6.369	0.25402				109.455	0.954365			72.72	0.634063				8.658	0.426504			7.274	0.358327														6.095	0.250534				26.025	0.868385
				8.403	0.335144			5.63	0.224546				93.104	0.811796			93.059	0.811404				9.316	0.458918			5.588	0.275272														4.467	0.183615				20.44	0.682028
				7.661	0.30555			7.186	0.286605				132.74	1.15739			86.914	0.757824				10.314	0.508081			6.451	0.317785														3.405	0.139962				24.026	0.801684
				6.732	0.268498			5.211	0.207835				123.863	1.07999			62.865	0.548135				8.07	0.397539			5.784	0.284927														3.015	0.123931				20.82	0.694708
				33.07	1.31896			22.409	0.893757				139.153	1.21331			119.995	1.04627				9.607	0.473253			4.507	0.222021														3.772	0.155047				64.479	2.15149
				7.9	0.315082			4.94	0.197026				99.05	0.863641			97.594	0.850946				8.592	0.423253			6.423	0.316405														5.314	0.218431				10.254	0.342149
				7.981	0.318313			5.699	0.227298				107.436	0.93676			94.47	0.823707				10.122	0.498623			4.097	0.201823														2.272	0.0933902				31.996	1.06762
				8.652	0.345075			6.197	0.24716				151.976	1.32512			106.8	0.931215				9.288	0.457539			6.491	0.319755														6.603	0.271415				34.539	1.15247
				7.794	0.310855			6.993	0.278908				93.432	0.814656			89.969	0.784461				9.85	0.485224			6.834	0.336652														5.297	0.217732				13.571	0.452828
				9.873	0.393773			6.86	0.273603				117.039	1.02049			102.038	0.889694				9.02	0.444337			5.175	0.254927														6.425	0.264099				24.701	0.824207
				8.677	0.346072			6.885	0.2746				115.522	1.00726			87.44	0.76241				8.428	0.415174			4.762	0.234582														5.861	0.240916				21.627	0.721635
				9.205	0.367131			5.545	0.221156				144.095	1.2564			106.906	0.932139				9.352	0.460692			5.885	0.289903														3.579	0.147114				45.645	1.52305
				9.478	0.378019			5.715	0.227936				132.801	1.15792			90.474	0.788865				9.167	0.451578			5.362	0.264139														4.736	0.194673				42.944	1.43293
				8.984	0.358316			6.388	0.254778				86.086	0.750605			86.617	0.755235				10.476	0.516061			5.267	0.259459														7.276	0.299079				14.233	0.474917
				10.032	0.400115			6.144	0.245046				146.892	1.28079			6.543	0.05705				9.953	0.490298			6.132	0.30207														3.878	0.159405				50.229	1.67601
				28.927	1.15372			4.52	0.180275				81	0.706259			89.519	0.780538				9.144	0.450445			5.603	0.276011														6.06	0.249095				57.867	1.93087
				27.16	1.08324			5.215	0.207994				72.367	0.630985								9.731	0.479362			5.249	0.258572														5.003	0.205648				26.626	0.888439
				28.646	1.14251			5.493	0.219082				129.458	1.12878								8.879	0.437391			6.704	0.330248														6.796	0.279349				42.008	1.4017
				17.254	0.688155			5.862	0.233799				83.456	0.727673								9.605	0.473155			6.31	0.310839														5.742	0.236024				22.904	0.764245
				16.443	0.65581			5.898	0.235235				73.126	0.637603								9.839	0.484682			5.733	0.282415														6.387	0.262537				52.517	1.75235
				15.492	0.61788			6.571	0.262077				130.246	1.13565								8.613	0.424287			7.101	0.349804														6.709	0.275772				28.263	0.943061
				32.491	1.29587			5.861	0.233759				86.452	0.753796								10.592	0.521775			5.18	0.255173														6.828	0.280664				30.547	1.01927
				37.202	1.48376			4.79	0.191044				96.822	0.844214								11.25	0.554189			21.914	1.07951														6.492	0.266853				36.959	1.23322
				15.726	0.627213			5.165	0.206				64.147	0.559313								9.139	0.450199			5.548	0.273302														4.395	0.180656				31.187	1.04063
				14.602	0.582384			7.499	0.299089				81.462	0.710287								8.982	0.442465			5.817	0.286553														7.034	0.289132				25.006	0.834384
				30.795	1.22822			6.476	0.258288				95.285	0.830813								7.897	0.389016			6.956	0.342661														4.686	0.192617				23.076	0.769985
				15.533	0.619515			8.016	0.319709				81.341	0.709232								7.94	0.391135			6.91	0.340395														6.452	0.265208				28.954	0.966118
				14.797	0.590161			5.548	0.221275				90.33	0.787609								7.389	0.363992			5.35	0.263548														5.492	0.225748				26.071	0.86992
				38.236	1.525			6.546	0.26108				101.34	0.883608								9.066	0.446603			5.517	0.271774														4.457	0.183204				35.111	1.17156
				16.944	0.675792			5.864	0.233879				107.034	0.933255								8.219	0.404878			6.384	0.314484														4.321	0.177614				28.562	0.953038
				15.461	0.616644			6.407	0.255536				107.325	0.935793								9.102	0.448376			6.42	0.316257														3.802	0.156281				15.061	0.502545
				17.806	0.710171			5.682	0.22662				117.788	1.02702								29.674	1.46178			6.26	0.308376														4.716	0.19385				14.635	0.488331
				19.991	0.797318			7.406	0.29538				106.396	0.927692								23.034	1.13468			5.167	0.254533														6.38	0.262249				28.854	0.962781
				12.021	0.479443			7.431	0.296377				109.988	0.959012								22.408	1.10385			4.551	0.224188														3.954	0.162529				35.948	1.19949
				28.263	1.12724			7.624	0.304074				105.423	0.919209								25.92	1.27685			5.476	0.269755														4.636	0.190562				39.312	1.31174
				21.278	0.848648			6.026	0.24034				54.464	0.474885								16.341	0.804979			5.972	0.294188														5.465	0.224638				24.694	0.823973
				27.682	1.10406			5.695	0.227138				112.76	0.983182								13.07	0.643845			5.743	0.282908														5.593	0.229899				23.154	0.772587
				15.883	0.633475			7.567	0.301801				132.472	1.15506								12.223	0.602121			6.524	0.321381														3.409	0.140126				20.494	0.68383
				24.106	0.961439			9.661	0.385318				147.093	1.28254								8.792	0.433105			5.906	0.290937														3.224	0.132522				10.403	0.34712
				33.114	1.32071			7.525	0.300126				152.951	1.33362								14.732	0.725717			4.814	0.237144														5.592	0.229858				26.946	0.899116
				12.004	0.478765			7.709	0.307464				165.592	1.44384								13.82	0.680791			5.494	0.270641														3.573	0.146868				17.283	0.576688
				13.748	0.548323			6.879	0.274361				117.921	1.02818								11.851	0.583795			7.516	0.370248														5.114	0.21021				31.632	1.05548
				12.928	0.515618			7.698	0.307026				141.378	1.23271								13.131	0.64685			6.428	0.316652														3.891	0.159939				18.67	0.622968
				38.399	1.5315			7.468	0.297852				126.319	1.10141								14.515	0.715028			8.195	0.403696														3.761	0.154595				22.436	0.74863
				44.692	1.78249			9.872	0.393733				122.851	1.07117								13.415	0.66084			6.913	0.340543														4.593	0.188795				23.072	0.769851
				47.728	1.90358			5.833	0.232642				130.888	1.14124								8.569	0.42212			5.631	0.27739														4.471	0.18378				36.001	1.20126
				13.18	0.525669			6.692	0.266903				142.343	1.24112								11.934	0.587884			5.828	0.287095														2.675	0.109955				19.498	0.650596
				57.851	2.30732			8.572	0.341884				124.561	1.08608								9.681	0.476898			6.819	0.335913														4.15	0.170585				15.785	0.526703
				54.243	2.16342			6.952	0.277272				80.767	0.704227								15.089	0.743303			6.319	0.311282														1.476	0.0606708				25.552	0.852602
				12.045	0.480401			8.36	0.333429				98.056	0.854974								14.008	0.690052			5.689	0.280247														5.976	0.245643				24.477	0.816732
				14.518	0.579033			15.764	0.628729				186.186	1.6234								8.124	0.400199			7.152	0.352317														6.585	0.270675				34.666	1.15671
				36.775	1.46673			7.986	0.318512				102.633	0.894882								15.629	0.769905			6.866	0.338228														1.751	0.0719746				23.54	0.785467
				14.685	0.585694			12.786	0.509955				112.709	0.982737								16.433	0.809511			7.541	0.371479														4.482	0.184232				18.263	0.609388
				12.19	0.486184			7.455	0.297334				118.988	1.03749								14.367	0.707737			5.87	0.289164																			7.921	0.264303
				15.33	0.611419			6.818	0.271928				162.673	1.41839								13.846	0.682072			7.481	0.368524																			37.459	1.24991
				35.64	1.42146			32.45	1.29423				149.333	1.30207								20.136	0.991925			5.721	0.281824																			21.099	0.704017
				41.07	1.63803			6.671	0.266065				193.763	1.68947								9.756	0.480593			7.563	0.372563																			24.771	0.826542
				41.293	1.64692			6.764	0.269774				94.597	0.824814								10.132	0.499115			9.498	0.467884																			18.647	0.622201
				43.891	1.75054			7.457	0.297414				125.032	1.09018								7.264	0.357834			7.505	0.369706																			22.449	0.749063
				34.295	1.36782			7.301	0.291192				111.917	0.975831								7.91	0.389657			7.865	0.38744																			23.997	0.800716
				40.037	1.59683			6.687	0.266703				139.307	1.21465								14.961	0.736998			6.813	0.335617																			31.592	1.05414
				28.902	1.15272			8.149	0.325013				158.107	1.37857								9.565	0.471184			7.73	0.38079																			35.819	1.19518
				40.485	1.6147			7.053	0.281301				145.487	1.26854								9.083	0.44744			7.625	0.375617																			28.324	0.945096
				38.739	1.54506			4.736	0.18889				127.041	1.1077								8.291	0.408425			9.759	0.480741																			20.712	0.691104
				38.528	1.53664			6.993	0.278908				132.358	1.15406								14.797	0.728919			5.695	0.280543																			27.96	0.932951
				54.57	2.17646			7.339	0.292707				74.741	0.651685								9.048	0.445716			3.899	0.19207																			33.001	1.10116
				60.988	2.43243			7.048	0.281101				185.114	1.61405								6.615	0.325863			6.74	0.332021																			22.525	0.751599
				10.406	0.415031			4.131	0.16476				156.248	1.36236								8.986	0.442662			8.77	0.432021																			31.218	1.04166
				10.347	0.412678			7.129	0.284332				133.963	1.16806								6.746	0.332317			6.698	0.329952																			29.055	0.969488
				22.478	0.896509			6.049	0.241257				24.466	0.213325								9.924	0.488869			8.335	0.410593																			20.661	0.689403
				10.421	0.415629			13.034	0.519846				109.163	0.951819								9.679	0.4768			15.81	0.778821																			34.517	1.15174
				39.772	1.58626			8.247	0.328922				142.573	1.24313								9.376	0.461874			7.941	0.391184																			21.753	0.72584
				40.016	1.59599			6.404	0.255416				92.361	0.805318								9.191	0.45276			12.649	0.623106																			42.057	1.40333
				36.233	1.44511			5.705	0.227537				69.736	0.608045								9.05	0.445815			7.394	0.364238
				38.236	1.525			7.346	0.292987				148.485	1.29468								23.781	1.17148			32.396	1.59587
				30.164	1.20306			6.382	0.254539				129.387	1.12816								42.494	2.09331			7.042	0.346898
				29.511	1.17701			7.109	0.283534				147.354	1.28482								6.076	0.299312			6.653	0.327735
				36.858	1.47004			6.383	0.254578				107.232	0.934982								5.853	0.288326			6.615	0.325863
				35.095	1.39972			20.507	0.817898				156.713	1.36642								4.557	0.224484			7.569	0.372859
				29.877	1.19161			5.728	0.228455				103.917	0.906077								7.353	0.362218			7.376	0.363351
				27.683	1.1041			6.24	0.248875				113.422	0.988954								6.603	0.325272			6.737	0.331873
				60.884	2.42829			6.651	0.265267				33.525	0.292313								6.773	0.333647			8.109	0.39946
				25.34	1.01066			6.218	0.247998				165.124	1.43976								9.719	0.47877			5.166	0.254484
				28.332	1.12999			9.733	0.388189				110.838	0.966423								7.105	0.350001			7.48	0.368474
				25.918	1.03371			6.162	0.245764				119.653	1.04328								12.819	0.63148			4.632	0.228178
				36.026	1.43685			7.324	0.292109				103.503	0.902468								21.062	1.03754			7.093	0.34941
				28.882	1.15192			6.812	0.271689				80.571	0.702518								7.313	0.360248			6.95	0.342366
				33.13	1.32135			6.002	0.239383				104.339	0.909757								8.133	0.400642			4.03	0.198523
				28.953	1.15476			6.734	0.268578				118.075	1.02952								21.208	1.04473			7.096	0.349558
				30.795	1.22822			6.111	0.24373				104.333	0.909705								6.575	0.323893			5.841	0.287735
				32.795	1.30799			6.196	0.24712				124.603	1.08644								7.349	0.362021			12.865	0.633746
				40.986	1.63468			6.378	0.254379				126.099	1.09949								6.692	0.329656			8.378	0.412711
				26.941	1.07451			6.214	0.247838				124.27	1.08354								7.397	0.364386			5.294	0.260789
				31.627	1.26141			7.416	0.295778				127.088	1.10811								6.253	0.308031			6.476	0.319016
				36.097	1.43969			7.069	0.281939				174.337	1.52009								7.967	0.392465			28.963	1.42675
				31.22	1.24517			7.3	0.291152				105.629	0.921005								17.967	0.885077			15.864	0.781481
				38.644	1.54127			7.709	0.307464				158.126	1.37874								7.344	0.361775			7.075	0.348524
				31.348	1.25028			7.336	0.292588				106.603	0.929497								6.269	0.308819			6.351	0.312858
				30.796	1.22826			6.321	0.252106				167.436	1.45991								6.711	0.330592			5.734	0.282464
				38.866	1.55012			6.606	0.263473				115.185	1.00433								6.435	0.316996			7.247	0.356997
				30.112	1.20098			6.947	0.277073				141.352	1.23248								8.326	0.410149			6.533	0.321824
				29.566	1.17921			6.956	0.277432				58.146	0.506989								7.316	0.360396			7.212	0.355272
				35.521	1.41671			8.234	0.328403				96.395	0.840491								8.103	0.399164			6.392	0.314878
				36.754	1.46589			6.218	0.247998				81.719	0.712528								11.094	0.546505			19.922	0.981383
				32.634	1.30157			8.085	0.322461				168.016	1.46497								5.631	0.27739			9.384	0.462268
				30.514	1.21701			5.935	0.23671				95.882	0.836018								6.209	0.305863			5.645	0.27808
				10.034	0.400194			6.448	0.257171				155.221	1.35341								6.422	0.316356			6.276	0.309164
				32.613	1.30073			6.955	0.277392				148.728	1.2968								7.668	0.377736			6.554	0.322858
				29.753	1.18666			6.246	0.249114				94.472	0.823724								12.23	0.602465			6.171	0.303991
				32.224	1.28522			7.399	0.2951				91.08	0.794149								7.739	0.381233			6.205	0.305666
				25.098	1.001			7.477	0.298211				100.994	0.880591								6.814	0.335666			9.294	0.457834
				33.337	1.32961			5.919	0.236072				103.769	0.904787								6.997	0.344681			15.672	0.772023
				30.694	1.22419			7.374	0.294103				131.116	1.14323								9.45	0.465519			7.423	0.365666
				37.54	1.49724			6.366	0.2539				74.08	0.645921								10.081	0.496603			6.875	0.338671
				30.14	1.2021			6.16	0.245684				143.466	1.25091								7.593	0.374041			6.137	0.302316
				10	0.398838			6.875	0.274201				96.729	0.843404								12.02	0.592121			6.629	0.326553
				25.929	1.03415			6.821	0.272048				77.916	0.679368								6.745	0.332267			10.43	0.513795
				37.997	1.51547			6.201	0.24732				89.522	0.780564								8.341	0.410888			6.186	0.30473
				33.048	1.31808			6.707	0.267501				108.422	0.945358								7.08	0.34877			6.2	0.30542
				32.769	1.30695			6.994	0.278947				115.033	1.003								7.093	0.34941			6.373	0.313942
				28.73	1.14586			6.183	0.246602				73.14	0.637725								8.641	0.425667			6.113	0.301134
				35.865	1.43043			7.95	0.317076				131.616	1.14759								5.025	0.247538			7.4	0.364533
				33.969	1.35481			6.588	0.262755				103.577	0.903113								5.499	0.270888			7.057	0.347637
				33.238	1.32566			6.683	0.266544				120.253	1.04851								56.654	2.79085			6.929	0.341331
				35.025	1.39693			6.838	0.272726				136.291	1.18835								6.86	0.337932			7.61	0.374878
				36.542	1.45743			12.789	0.510074				64.741	0.564492								6.091	0.30005			7.239	0.356602
				36.677	1.46282			19.91	0.794087				102.766	0.896042								5.121	0.252267			6.222	0.306504
				34.08	1.35924			11.364	0.45324				110.118	0.960145								5.687	0.280149			7.058	0.347686
				36.841	1.46936			5.161	0.20584				133.635	1.1652								6.016	0.296356			5.622	0.276947
				35.255	1.4061			5.488	0.218882				130.46	1.13751								6.555	0.322908			6.978	0.343745
				38.118	1.52029			6.396	0.255097				107.388	0.936342								5.917	0.291479			8.305	0.409115
				10.065	0.401431			6.087	0.242773				126.079	1.09931								9.311	0.458672			6.222	0.306504
				39.494	1.57517			6.219	0.248037				104.102	0.90769								6.537	0.322021			5.779	0.284681
				9.161	0.365376			10.668	0.425481				93.486	0.815127								6.561	0.323203			8.236	0.405716
				16.304	0.650266			7.85	0.313088				121.036	1.05534								6.511	0.32074			10.852	0.534583
				24.794	0.98888			6.63	0.26443				119.145	1.03885								9.474	0.466701			6.486	0.319509
				19.57	0.780526			7.983	0.318393				157.543	1.37366								6.877	0.33877			6.898	0.339804
				29.656	1.18279			6.942	0.276874				124.254	1.0834								6.241	0.30744			6.412	0.315863
				29.579	1.17972			5.935	0.23671				103.833	0.905345								11.237	0.553549			7.488	0.368868
				16.637	0.663547			6.593	0.262954				146.134	1.27418								12.994	0.640101			5.941	0.292661
				32.543	1.29794			7.267	0.289836				155.942	1.3597								7.366	0.362859			6.376	0.31409
				31.545	1.25814			6.621	0.264071				127.029	1.1076								7.566	0.372711			6.127	0.301824
				34.148	1.36195			6.898	0.275119				111.894	0.975631								26.44	1.30247			6.68	0.329065
				38.534	1.53688			6.791	0.270851				102.14	0.890583								7.869	0.387637			6.707	0.330395
				48.872	1.9492			6.997	0.279067				76.699	0.668757								8.484	0.417933			5.923	0.291775
				46.595	1.85839			5.613	0.223868				130.064	1.13406								8.769	0.431972			6.677	0.328918
				18.445	0.735657			6.889	0.27476				108.696	0.947747								7.65	0.376849			7.033	0.346455
				13.869	0.553149			7.11	0.283574				93.212	0.812738								8.108	0.39941			6.242	0.307489
				30.941	1.23405			6.991	0.278828				17.196	0.149936								7.941	0.391184			8.24	0.405913
				14.302	0.570418			7.724	0.308063				80.73	0.703904								8.172	0.402563			6.547	0.322514
				24.373	0.972088			7.057	0.28146				85.171	0.742627								8.128	0.400396			6.635	0.326849
				13.919	0.555143			6.512	0.259723				134.734	1.17478								8.502	0.418819			6.998	0.34473
				14.533	0.579632			7.103	0.283295				114.648	0.999644								8.519	0.419657			5.576	0.274681
				19.281	0.769			6.646	0.265068				135.422	1.18078								8.755	0.431283			11.982	0.590249
				27.624	1.10175			6.769	0.269974				94.072	0.820236								8.78	0.432514			19.719	0.971383
				20.768	0.828307			6.419	0.256014				137.758	1.20115								9.903	0.487834			11.234	0.553401
				31.861	1.27074			5.673	0.226261				89.057	0.776509								9.16	0.451233			24.538	1.20877
				34.225	1.36502			5.322	0.212262				107.619	0.938356								9.115	0.449017			5.15	0.253696
				32.235	1.28566			6.226	0.248317				71.536	0.62374								7.683	0.378474			5.559	0.273843
				53.426	2.13083			5.228	0.208513				118.123	1.02994								11.005	0.54212			6.274	0.309065
				59.41	2.3695			5.994	0.239064				114.427	0.997717								8.463	0.416898			6.009	0.296011
				51.02	2.03487			7.863	0.313607				126.509	1.10306								8.557	0.421529			6.207	0.305765
				24.177	0.964271			8.117	0.323737				97.688	0.851765								5.743	0.282908			10.596	0.521973
				31.746	1.26615			8.619	0.343759				112.968	0.984995								5.892	0.290247			7.783	0.383401
				23.167	0.923989			5.089	0.202969				119.298	1.04019								8.98	0.442366			8.003	0.394238
				23.013	0.917846			5.439	0.216928				106.38	0.927553								5.891	0.290198			6.6	0.325124
				47.601	1.89851			8.607	0.34328				96.604	0.842314								7.845	0.386455			6.979	0.343794
				31.842	1.26998			6.433	0.256573				105.006	0.915573								5.392	0.265617			5.987	0.294927
				38.325	1.52855			6.192	0.246961				77.828	0.678601								7.628	0.375765			7.337	0.36143
				48.966	1.95295			5.484	0.218723				119.13	1.03872								7.908	0.389558			6.548	0.322563
				52.815	2.10646			6.121	0.244129				112.013	0.976668								8.059	0.396997			6.981	0.343893
				22.661	0.903807			6.138	0.244807				101.703	0.886773								26.79	1.31971			6.855	0.337686
				23.393	0.933002			6.534	0.260601				104.276	0.909208								16.074	0.791826			7.061	0.347834
				37.757	1.50589			6.284	0.25063				115.512	1.00718								34.568	1.70286			5.411	0.266553
				39.908	1.59168			6.691	0.266863				72.73	0.63415								43.058	2.12109			6.808	0.335371
				16.695	0.66586			5.789	0.230887				134.639	1.17395								44.981	2.21582			7.117	0.350593
				24.214	0.965747			6.174	0.246243				152.988	1.33394								45.015	2.2175			7.11	0.350248
				56.09	2.23708			6.755	0.269415				130.331	1.13639								44.592	2.19666			7.688	0.378721
				23.205	0.925504			12.609	0.502895				105.061	0.916052								57.254	2.82041			7.057	0.347637
				54.216	2.16234			6.352	0.253342				92.704	0.808309								37.106	1.82789			6.546	0.322464
				21.343	0.85124			6.69	0.266823				110.641	0.964706								48.813	2.40459			6.361	0.313351
				39.867	1.59005			6.613	0.263752				138.607	1.20855								47.304	2.33026			6.892	0.339509
				33.49	1.33571			5.847	0.233201				140.755	1.22728								44.63	2.19853			11.348	0.559017
				33.91	1.35246			16.998	0.677945				118.501	1.03324								23.38	1.15173			6.571	0.323696
				44.91	1.79118			6.553	0.261359				94.367	0.822809								40.089	1.97484			6.436	0.317046
				35.284	1.40726			6.706	0.267461				129.041	1.12514								33.034	1.6273			6.341	0.312366
				34.537	1.37747			6.098	0.243212				97.697	0.851844								38.515	1.8973			5.112	0.251824
				26.668	1.06362			6.67	0.266025				75.886	0.661668								41.257	2.03237			5.335	0.262809
				25.154	1.00324			5.039	0.200975				134.286	1.17087								52.049	2.564			5.633	0.277489
				23.626	0.942295			6.202	0.247359				121.664	1.06082								47.374	2.3337			6.137	0.302316
				31.479	1.2555			6.621	0.264071				83.871	0.731291								46.187	2.27523			5.281	0.260149
				21.151	0.843583			7.448	0.297055				84.561	0.737308								49.788	2.45262			7.812	0.384829
				29.348	1.17051			5.531	0.220597				141.798	1.23637								43.532	2.14444			8.473	0.417391
				25.494	1.0168			5.798	0.231246				99.905	0.871096								42.184	2.07804			6.131	0.302021
				30.375	1.21147			6.183	0.246602				123.058	1.07297								35.541	1.7508			9.172	0.451824
				31.708	1.26464			6.237	0.248755				139.084	1.21271								37.706	1.85745			4.96	0.244336
				20.759	0.827948			6.036	0.240739				68.981	0.601462								37.137	1.82942			5.349	0.263499
				18.639	0.743395			7.682	0.306388				57.412	0.500589								33.168	1.6339			8.614	0.424337
				21.568	0.860214			6.51	0.259644				135.169	1.17857								39.059	1.9241			6.461	0.318277
				21.369	0.852277			6.328	0.252385				136.761	1.19245								29.851	1.4705			6.203	0.305568
				21.339	0.851081			6.93	0.276395				152.386	1.32869								23.813	1.17306			5.454	0.268671
				30.449	1.21442			152.487	6.08176				125.783	1.09673								28.935	1.42538			6.126	0.301775
				22.299	0.889369			129.352	5.15905				176.852	1.54202								64.41	3.17292			6.161	0.303499
				15.111	0.602684			43.666	1.74157				178.887	1.55976								27.587	1.35897			6.571	0.323696
				8.067	0.321743			6.144	0.245046				87.561	0.763465								25.278	1.24523			6.04	0.297538
				8.806	0.351217			4.924	0.196388				146.153	1.27434								21.621	1.06508			6.654	0.327785
				15.436	0.615647			6.431	0.256493				134.794	1.1753								13.885	0.683993			5.689	0.280247
				6.951	0.277232			5.943	0.23703				124.195	1.08289								36.824	1.814			6.12	0.301479
				7.759	0.309459			5.675	0.226341				121.62	1.06043								37.827	1.86341			6.889	0.339361
				7.75	0.3091			5.844	0.233081				144.744	1.26206								26.843	1.32232			12.263	0.604091
				8.912	0.355445			6.303	0.251388				84.902	0.740281								31.123	1.53316			6.266	0.308671
				8.687	0.346471			5.83	0.232523				100.011	0.87202								37.236	1.83429			6.662	0.328179
				8.273	0.329959			8.939	0.356521				166.049	1.44782								36.965	1.82094			6.466	0.318523
				8.474	0.337976			7.208	0.287483				74.169	0.646697								36.633	1.80459			16.24	0.800003
				8.011	0.319509			4.76	0.189847				142.376	1.24141								24.842	1.22375			5.971	0.294139
				8.075	0.322062			8.362	0.333509				156.357	1.36331								28.784	1.41794			7.95	0.391627
				9.063	0.361467			6.416	0.255895				132.894	1.15873								26.436	1.30227			6.396	0.315075
				7.161	0.285608			7.651	0.305151				131.125	1.14331								21.543	1.06124			6.789	0.334435
				8.838	0.352493			6.433	0.256573				141.661	1.23518								31.251	1.53946			6.162	0.303548
				22.449	0.895352			5.837	0.232802				121.736	1.06145								36.757	1.8107			6.665	0.328326
				39.892	1.59105			6.408	0.255576				127.531	1.11197								32.737	1.61267			5.06	0.249262
				38.751	1.54554			4.394	0.17525				172.615	1.50507								26.727	1.31661			6.119	0.30143
				33.674	1.34305			6.19	0.246881				116.946	1.01968								30.772	1.51587			7.002	0.344927
				38.858	1.54981			6.426	0.256293				111.816	0.974951								51.686	2.54612			5.465	0.269213
				30.952	1.23448			4.812	0.191921				131.658	1.14796								14.091	0.694141			5.804	0.285912
				29.41	1.17298			7.033	0.280503				109.394	0.953833								15.341	0.755717			6.204	0.305617
				35.28	1.4071			4.992	0.1991				80.325	0.700373								13.709	0.675323			6.157	0.303302
				35.168	1.40263			5.67	0.226141				123.16	1.07386								14.026	0.690939			6.139	0.302415
				23.295	0.929094			5.981	0.238545				109.355	0.953493								13.801	0.679855			7.58	0.373401
				30.381	1.21171			6.765	0.269814				193.715	1.68905								12	0.591135			4.775	0.235223
				28.709	1.14502			6.32	0.252066				104.194	0.908493								19.275	0.949511			6.363	0.31345
				57.809	2.30564			4.554	0.181631				162.891	1.42029								11.233	0.553352			6.131	0.302021
				25.995	1.03678			5.538	0.220877				116.208	1.01325								11.751	0.578869			6.854	0.337637
				25.218	1.00579			6.06	0.241696				151.075	1.31726								12.176	0.599805			152.606	7.51757
				36.313	1.4483			6.228	0.248396				87.42	0.762236								12.294	0.605618			131.458	6.47579
				26.981	1.07611			5.767	0.23001				119.682	1.04354								8.725	0.429805			43.615	2.14853
				28.661	1.14311			5.544	0.221116				125.185	1.09152								11.891	0.585766			3.516	0.173203
				32.018	1.277			5.025	0.200416				113.849	0.992677								11.011	0.542416			6.1	0.300494
				27.675	1.10378			7.992	0.318752				180.851	1.57688								11.653	0.574042			5.059	0.249213
				30.657	1.22272			5.097	0.203288				158.067	1.37822								11.632	0.573007			6.399	0.315223
				33.248	1.32606			5.345	0.213179				132.331	1.15383								11.082	0.545914			5.773	0.284385
				38.213	1.52408			6.837	0.272686				153.474	1.33818												5.674	0.279509
				27.104	1.08101			5.892	0.234995				87.827	0.765785												6.185	0.304681
				33.617	1.34077			6.57	0.262037				148.398	1.29392												6.436	0.317046
				36.541	1.45739			8.278	0.330158				78.315	0.682847												5.969	0.294041
				29.861	1.19097			6.514	0.259803				118.082	1.02959												8.923	0.439558
				38.505	1.53573			5.695	0.227138				148.043	1.29082												7.168	0.353105
				33.499	1.33607			6.685	0.266623				91.271	0.795814												8.467	0.417095
				30.552	1.21853			7.057	0.28146				93.047	0.811299												6.102	0.300592
				38.982	1.55475			5.96	0.237708				121.763	1.06168												11.389	0.561037
				29.172	1.16349			6.185	0.246681				93.048	0.811308												7.704	0.379509
				29.747	1.18642			4.997	0.199299				146.076	1.27367												6.368	0.313696
				35.659	1.42222			5.833	0.232642				122.794	1.07067												5.828	0.287095
				38.002	1.51567			5.638	0.224865				160.36	1.39822												6.528	0.321578
				33.792	1.34775			8.731	0.348226				121.773	1.06177												4.261	0.209902
				31.232	1.24565			7.128	0.284292				101.693	0.886686												6.216	0.306208
				31.4	1.25235			7.139	0.284731				142.473	1.24226												6.556	0.322957
				29.399	1.17254			6.08	0.242494				74.056	0.645712												5.115	0.251971
				32.083	1.27959			8.242	0.328722				160.262	1.39736												6.989	0.344287
				25.166	1.00372			5.767	0.23001				100.048	0.872343												5.101	0.251282
				31.232	1.24565			5.614	0.223908				74.467	0.649296												5.34	0.263055
				28.89	1.15224			6.246	0.249114				143.296	1.24943												5.682	0.279903
				37.318	1.48838			5.912	0.235793				133.838	1.16697												5.992	0.295174
				30.322	1.20936			7.777	0.310176				151.331	1.31949												6.725	0.331282
				29.089	1.16018			6.355	0.253462				146.122	1.27407												6.341	0.312366
				38.142	1.52125			7.07	0.281979				132.345	1.15395												4.513	0.222316
				31.154	1.24254			6.368	0.25398				134.527	1.17297												5.325	0.262316
				32.529	1.29738			6.179	0.246442				194.438	1.69535												6.063	0.298671
				28.555	1.13888			6.602	0.263313				145.416	1.26792												6.043	0.297686
				34.095	1.35984			5.926	0.236352				111.27	0.97019												5.563	0.274041
				34.553	1.37811			9.277	0.370002				125.918	1.09791												5.513	0.271577
				33.371	1.33096			6.74	0.268817				169.743	1.48003												5.074	0.249952
				36.211	1.44423			9.605	0.383084				127.433	1.11112												7.926	0.390445
				38.759	1.54586			5.57	0.222153				139.314	1.21471												5.099	0.251183
				37.852	1.50968			5.171	0.206239				114.878	1.00165												5.274	0.259804
				34.86	1.39035			5.862	0.233799				131.573	1.14722												6.865	0.338179
				36.704	1.4639			7.359	0.293505				166.651	1.45307												6.024	0.29675
				36.866	1.47036			6.766	0.269854				148.276	1.29285												6.623	0.326257
				38.813	1.54801			6.086	0.242733				113.448	0.98918												6.145	0.302711
				39.366	1.57007			5.904	0.235474				122.458	1.06774												8.155	0.401726
				23.423	0.934199			6.833	0.272526				146.182	1.2746												6.467	0.318573
				21.729	0.866636			6.404	0.255416				91.685	0.799424												5.989	0.295026
				18.747	0.747702			6.12	0.244089				137.083	1.19526												6.836	0.33675
				26.304	1.0491			7.887	0.314564				176.738	1.54102												4.11	0.202464
				28.657	1.14295			6.336	0.252704				143.724	1.25316												22.715	1.11897
				32.227	1.28534			6.57	0.262037				159.105	1.38727												13.623	0.671086
				15.027	0.599334			8.362	0.333509				143.929	1.25495												5.994	0.295272
				31.847	1.27018			7.024	0.280144				117.295	1.02272												6.194	0.305124
				36.398	1.45169			7.303	0.291272				162.053	1.41298												4.736	0.233301
				39.667	1.58207			8.95	0.35696				153.44	1.33788												5.794	0.28542
				52.017	2.07464			10.522	0.419658				137.775	1.20129												5.62	0.276848
				47.796	1.90629			6.2	0.24728				88.411	0.770877												8.457	0.416603
				19.248	0.767684			6.496	0.259085				132.929	1.15904												7.041	0.346849
				13.508	0.538751			5.722	0.228215				158.366	1.38083												7.255	0.357391
				30.806	1.22866			7.194	0.286924				98.928	0.862577												6.104	0.300691
				23.552	0.939344			7.593	0.302838				139.126	1.21307												4.99	0.245814
				15.367	0.612895			7.382	0.294422				28.667	0.249954												8.371	0.412366
				12.897	0.514382			6.451	0.257291				119.587	1.04271												4.339	0.213745
				16.717	0.666738			6.472	0.258128				155.582	1.35656												5.896	0.290445
				29.191	1.16425			8.084	0.322421				112.482	0.980758												5.574	0.274582
				19.051	0.759827			6.616	0.263871				142.117	1.23915												6.159	0.3034
				32.621	1.30105			7.273	0.290075				128.617	1.12144												6.03	0.297046
				34.444	1.37376			7.403	0.29526				75.486	0.658181												7.824	0.38542
				32.147	1.28215			7.397	0.295021				140.756	1.22729												16.5	0.812811
				34.063	1.35856			7.932	0.316358				156.187	1.36183												6.355	0.313055
				38.189	1.52312			6.578	0.262356				145.291	1.26683												5.238	0.258031
				33.122	1.32103			6.317	0.251946				124.965	1.0896												7.062	0.347883
				30.706	1.22467			7.823	0.312011				195.23	1.70226												6.253	0.308031
				32.214	1.28482			6.118	0.244009				176.267	1.53691												6.202	0.305518
				38.042	1.51726			6.152	0.245365				36.132	0.315044												5.716	0.281577
				35.728	1.42497			5.532	0.220637				140.154	1.22204												5.729	0.282218
								7.3	0.291152				100.054	0.872395												6.656	0.327883
								6.726	0.268259				134.903	1.17625												9.089	0.447736
								6.233	0.248596				85.953	0.749445												6.935	0.341627
								6.02	0.240101				170.079	1.48296												6.003	0.295715
								8.787	0.350459				140.695	1.22675												9.795	0.482514
								6.011	0.239742				166.381	1.45072												5.544	0.273105
								8.846	0.352812				146.265	1.27532												4.937	0.243203
								6.958	0.277512				152.202	1.32709												5.731	0.282316
								6.636	0.264669				133.162	1.16107												14.609	0.719658
								6.251	0.249314				111.367	0.971036												7.294	0.359312
								6.046	0.241138				123.954	1.08078												6.91	0.340395
								6.572	0.262116				154.175	1.34429												6.354	0.313006
								6.566	0.261877				125.72	1.09618												6.897	0.339755
								5.605	0.223549				54.731	0.477213												6.155	0.303203
								7.177	0.286246				138.016	1.20339												6.121	0.301528
								6.911	0.275637				128.689	1.12207												8.018	0.394977
								9.645	0.384679				127.864	1.11488												6.39	0.31478
								5.657	0.225623				150.435	1.31168												6.424	0.316454
								6.404	0.255416				142.338	1.24108												8.531	0.420248
								5.727	0.228415				106.956	0.932575												7.236	0.356455
								2.706	0.107926				123.877	1.08011												7.697	0.379164
								5.515	0.219959				148.582	1.29552												13.443	0.662219
								5.776	0.230369				122.704	1.06989												4.244	0.209065
								10.373	0.413715				109.741	0.956858												10.312	0.507982
								6.413	0.255775				119.702	1.04371												9.267	0.456504
								6.99	0.278788				178.809	1.55908												6.195	0.305174
								4.701	0.187494				100.649	0.877583												5.786	0.285026
								5.401	0.215413				152	1.32532												10.243	0.504583
								7.859	0.313447				116.303	1.01407												6.487	0.319558
								5.249	0.20935				163.228	1.42322												14.109	0.695027
								8.075	0.322062				129.188	1.12642												5.71	0.281282
								12.31	0.49097				104.818	0.913933												7.24	0.356652
								7.83	0.31229				190.014	1.65678												14.134	0.696259
								10.228	0.407932				113.917	0.99327												7.677	0.378179
								7.224	0.288121				172.841	1.50704												7.284	0.358819
								7.563	0.301641				135.885	1.18481												6.51	0.320691
								5.781	0.230568				116.34	1.0144												6.645	0.327341
								6.449	0.257211				139.171	1.21347												5.54	0.272908
								9.865	0.393454				114.881	1.00168												7.057	0.347637
								8.258	0.329361				156.296	1.36278												7.972	0.392711
								7.071	0.282019				141.464	1.23346												6.571	0.323696
								5.038	0.200935				140.603	1.22595												7.205	0.354928
								6.862	0.273683				127.034	1.10764												7.518	0.370346
								19.957	0.795961				121.49	1.0593												6.894	0.339607
								6.989	0.278748				129.501	1.12915												7.796	0.384041
								6.881	0.274441				93.741	0.81735												6.601	0.325174
								4.991	0.19906				137.176	1.19607												6.21	0.305913
								5.951	0.237349				74.653	0.650918												7.651	0.376898
								6.093	0.243012				180.946	1.57771												6.13	0.301972
								6.34	0.252863				150.715	1.31412												6.127	0.301824
								4.816	0.19208				133.022	1.15985												5.504	0.271134
								6.559	0.261598				153.172	1.33554												6.694	0.329755
								5.437	0.216848				132	1.15094												7.478	0.368376
								7.065	0.281779				123.926	1.08054												6.354	0.313006
								5.112	0.203886				141.873	1.23702												5.97	0.29409
								10.436	0.416228				125.006	1.08996												5.979	0.294533
								5.958	0.237628				137.928	1.20263												9.785	0.482022
								5.609	0.223708				118.164	1.0303												4.669	0.230001
								6.807	0.271489				104.621	0.912216												8.184	0.403154
								5.64	0.224945				87.563	0.763483												6.203	0.305568
								5.324	0.212341				152.351	1.32839												8.682	0.427686
								6.782	0.270492				116.237	1.0135												7.115	0.350494
								5.501	0.219401				31.582	0.275371												6.707	0.330395
								6.84	0.272805				166.812	1.45447												4.477	0.220543
								7.44	0.296736				112.007	0.976616												6.228	0.306799
								6.126	0.244328				102.571	0.894341												5.965	0.293844
								6.902	0.275278				150.272	1.31026												6.073	0.299164
								5.362	0.213857				95.494	0.832635												6.607	0.325469
								5.899	0.235275				114.097	0.994839												5.711	0.281331
								6.13	0.244488				123.761	1.0791												7.148	0.35212
								7.081	0.282417				109.133	0.951557												6.878	0.338819
								7.046	0.281021				103.326	0.900924												9.366	0.461381
								6.24	0.248875				76.515	0.667153												5.624	0.277045
								7.721	0.307943				104.112	0.907778												9.659	0.475815
								21.971	0.876287				91.093	0.794262												6.564	0.323351
								6.985	0.278589				115.17	1.0042												4.913	0.242021
								7.381	0.294383				115.858	1.01019												5.339	0.263006
								4.811	0.191881				141.455	1.23338												5.563	0.274041
								7.44	0.296736				129.547	1.12955												2.58	0.127094
								8.471	0.337856				110.167	0.960573												5.537	0.27276
								6.363	0.253781				137.68	1.20047												5.721	0.281824
								6.541	0.26088				106.884	0.931947												10.298	0.507293
								6.932	0.276475				167.846	1.46349												6.239	0.307341
								7.214	0.287722				112.085	0.977296												6.955	0.342612
								6.972	0.27807				119.08	1.03829												4.558	0.224533
								6.276	0.250311				141.69	1.23543												5.404	0.266208
								7.973	0.317994				137.459	1.19854												8.09	0.398524
								7.057	0.28146				96.453	0.840997												4.781	0.235518
								7.733	0.308422				137.765	1.20121												5.333	0.26271
								6.184	0.246642				93.886	0.818615												8.045	0.396307
								6.437	0.256732				117.614	1.0255												11.909	0.586653
								6.981	0.278429				160.497	1.39941												7.848	0.386603
								6.469	0.258008				129.11	1.12574												5.637	0.277686
								7.189	0.286725				108.34	0.944643												10.318	0.508278
								8.048	0.320985				101.673	0.886511												6.49	0.319706
								6.089	0.242853				103.253	0.900288												7.712	0.379903
								7.215	0.287762				140.474	1.22483												5.796	0.285518
								6.189	0.246841				137.139	1.19575												5.553	0.273548
								5.513	0.21988				106.811	0.931311												6.349	0.31276
								16.919	0.674794				157.099	1.36978												4.769	0.234927
								7.632	0.304393				80.859	0.705029												9.338	0.460002
								9.375	0.373911				167.192	1.45779												7.421	0.365568
								5.919	0.236072				133.854	1.16711												6.657	0.327932
								6.855	0.273404				122.836	1.07104												4.752	0.23409
								7.332	0.292428				108.584	0.94677												19.996	0.985029
								4.325	0.172498				89.048	0.776431												6.969	0.343302
								6.697	0.267102				142.083	1.23886												6.863	0.33808
								6.972	0.27807				134.857	1.17585												4.925	0.242612
								5.371	0.214216				101.332	0.883538												5.963	0.293745
								6.117	0.243969				106.88	0.931913												5.685	0.28005
								6.53	0.260441				89.248	0.778175												6.177	0.304287
								7.116	0.283813				101.096	0.88148												4.689	0.230986
								6.143	0.245006				110.958	0.96747												6.746	0.332317
								7.531	0.300365				139.829	1.2192												4.997	0.246159
								6.198	0.2472				143.705	1.253												5.435	0.267735
								6.848	0.273124				85.645	0.746759												7.152	0.352317
								6.432	0.256533				97.961	0.854146												5.152	0.253794
								5.931	0.236551				72.349	0.630828												9.893	0.487342
								8.085	0.322461				117.946	1.0284												5.584	0.275075
								6.424	0.256214				124.14	1.08241												5.67	0.279311
								6.844	0.272965				113.531	0.989904												7.129	0.351184
								7.316	0.29179				166.23	1.4494												5.207	0.256503
								5.347	0.213259				93.851	0.81831												5.498	0.270839
								6.244	0.249035				115.238	1.00479												6.211	0.305962
								6.017	0.239981				85.797	0.748085												6.811	0.335519
								5.848	0.233241				92.689	0.808178												7.459	0.36744
								6.789	0.270771				95.375	0.831598												5.962	0.293696
								7.093	0.282896				129.814	1.13188												6.934	0.341578
								5.668	0.226062				108.056	0.942166												5.772	0.284336
								5.293	0.211105				123.126	1.07357												5.879	0.289607
								11.441	0.456311				130.291	1.13604												6.063	0.298671
								5.824	0.232283				118.228	1.03086												7.047	0.347144
								5.863	0.233839				115.361	1.00586												6.196	0.305223
								5.558	0.221674				139.522	1.21653												6.882	0.339016
								6.576	0.262276				102.568	0.894315												7.69	0.378819
								4.853	0.193556				131.656	1.14794												21.059	1.03739
								4.963	0.197943				73.227	0.638484												6.958	0.34276
								5.386	0.214814				95.226	0.830298												7.223	0.355814
								7.812	0.311572				105.241	0.917622												4.921	0.242415
								4.386	0.17493				114.362	0.99715												7.446	0.3668
								7.052	0.281261				113.876	0.992912												8.404	0.413992
								5.17	0.206199				112.703	0.982685												6.734	0.331725
								7.087	0.282657				123.627	1.07793												6.225	0.306651
								5.387	0.214854				97.053	0.846229												7.057	0.347637
								6.116	0.243929				119.981	1.04614												7.114	0.350445
								6.922	0.276076				71.094	0.619886												6.997	0.344681
								6.07	0.242095				140.065	1.22126												6.368	0.313696
								5.874	0.234278				96.047	0.837457												7.994	0.393795
								6.536	0.260681				77.934	0.679525												7.137	0.351578
								7.649	0.305071				84.058	0.732922												7.43	0.366011
								9.559	0.381249				120.915	1.05429												6.12	0.301479
								7.343	0.292867				83.635	0.729234												6.351	0.312858
								6.314	0.251826				146.425	1.27671												6.939	0.341824
								6.496	0.259085				121.5	1.05939												7.176	0.353499
								6.829	0.272367				101.803	0.887645												6.275	0.309115
								6.675	0.266225				149.176	1.3007												8.007	0.394435
								7.356	0.293385				145.475	1.26843												6.14	0.302464
								6.716	0.26786				62.917	0.548589												7.409	0.364977
								6.413	0.255775				61.038	0.532205												6.174	0.304139
								6.894	0.274959				135.194	1.17879												5.472	0.269558
								6.737	0.268697				156.172	1.3617												16.3	0.802959
								5.762	0.229811				126.038	1.09896												7.635	0.37611
								7.891	0.314723				177.893	1.55109												8.836	0.435273
								5.77	0.23013				174.713	1.52336												5.999	0.295518
								4.394	0.17525				134.357	1.17149												6.901	0.339952
								5.883	0.234637				89.601	0.781253												7.157	0.352563
								6.259	0.249633				149.098	1.30002												4.3	0.211824
								6.11	0.24369				121.163	1.05645												6.825	0.336208
								5.482	0.218643				118.745	1.03537												5.379	0.264976
								7.093	0.282896				137.17	1.19602												7.105	0.350001
								6.792	0.270891				99.238	0.86528												6.184	0.304632
								6.982	0.278469				88.308	0.769979												7.218	0.355568
								6.517	0.259923				153.3	1.33666												6.552	0.32276
								6.858	0.273523				72.839	0.635101												6.169	0.303893
								6.855	0.273404				159.004	1.38639												7.642	0.376455
								7.385	0.294542				140.22	1.22261												6.272	0.308967
								6.944	0.276953				143.275	1.24925												7.036	0.346602
								7.62	0.303915				125.481	1.0941												6.339	0.312267
								7.928	0.316199				122.906	1.07165												5.97	0.29409
													121.363	1.05819												8.019	0.395026
													174.994	1.52581												6.603	0.325272
													108.644	0.947293												6.764	0.333203
													131.003	1.14225												8.593	0.423302
													83.926	0.731771												7.338	0.361479
													117.906	1.02805												5.482	0.27005
													125.035	1.09021												6.253	0.308031
													106.204	0.926018												6.104	0.300691
													189.124	1.64902												5.939	0.292563
													106.014	0.924362												6.653	0.327735
													163.921	1.42927												7.11	0.350248
													114.221	0.99592												7.01	0.345322
													151.641	1.32219												5.713	0.28143
													89.43	0.779762												5.668	0.279213
													124.362	1.08434												10.697	0.526948
													125.236	1.09196												5.874	0.289361
													116.669	1.01727												5.584	0.275075
													176.278	1.53701												5.89	0.290149
													159.627	1.39183												6.381	0.314336
													136.015	1.18595												4.938	0.243252
													150.819	1.31503												4.788	0.235863
													88.342	0.770275												5.488	0.270346
													150.026	1.30811												7.673	0.377982
													81.577	0.71129												4.448	0.219114
													110.77	0.96583												6.978	0.343745
													147.766	1.28841												5.294	0.260789
													90.167	0.786188												6.743	0.332169
													123.754	1.07904												7.025	0.346061
													92.498	0.806512												5.496	0.27074
													92.083	0.802894												8.342	0.410938
													124.115	1.08219												6.109	0.300937
													142.728	1.24448												6.099	0.300445
													158.521	1.38218												6.96	0.342859
													55.316	0.482314												5.845	0.287932
													119.996	1.04627												6.536	0.321972
													110.03	0.959378												7.808	0.384632
													139.31	1.21468												9.507	0.468327
													74.837	0.652522												7.52	0.370445
													160.812	1.40216												6.172	0.304041
													102.305	0.892022												6.403	0.31542
													75.347	0.656969												7.011	0.345371
													141.562	1.23431												6.68	0.329065
													130.931	1.14162												7.404	0.364731
													147.649	1.28739												6.973	0.343499
													133.266	1.16198												6.405	0.315519
													153.419	1.3377												6.729	0.331479
													137.163	1.19596												5.741	0.282809
													188.526	1.6438												7.696	0.379115
													146.975	1.28151												5.639	0.277784
													113.365	0.988457												4.345	0.21404
													121.949	1.0633												5.861	0.28872
													166.828	1.45461												6.251	0.307932
													122.595	1.06894												6.135	0.302218
													136.484	1.19004												5.182	0.255272
													110.545	0.963869												7.243	0.356799
													130.225	1.13546												6.828	0.336356
													161.791	1.41069												6.861	0.337982
													144.091	1.25636												6.395	0.315026
													110.606	0.9644												6.742	0.33212
													127.527	1.11194												6.707	0.330395
													147.438	1.28555												7.408	0.364928
													93.146	0.812162												6.979	0.343794
													130.748	1.14002												7.773	0.382908
													170.993	1.49093												7.897	0.389016
													141.303	1.23205
													71.587	0.624184
													155.082	1.3522
													156.642	1.3658
													111.044	0.968219
													117.587	1.02527
													155.677	1.35739
													150.303	1.31053
													121.088	1.0558
													132.848	1.15833
													153.706	1.3402
													94.643	0.825215
													139.737	1.2184
													26.702	0.232821
													117.728	1.0265
													106.84	0.931564
													151.048	1.31702
													112.647	0.982196
													134.63	1.17387
													127.471	1.11145
													121.59	1.06017
													134.243	1.1705
													152.689	1.33133
													108.924	0.949735
													89.007	0.776074
													135.668	1.18292
													118.431	1.03263
													94.805	0.826628
													46.224	0.403038
													122.398	1.06722
													68.541	0.597626
													82.773	0.721718
													82.48	0.719163
													103.917	0.906077
													93.911	0.818833
													96.361	0.840195
													69.554	0.606458
													93.859	0.818379
													26.193	0.228383
													123.743	1.07895
													86.954	0.758173
													105.594	0.9207
													102.431	0.893121
													101.617	0.886023
													86.565	0.754781
													85.554	0.745966
													79.574	0.693825
													105.715	0.921755
													94.185	0.821222
													84.955	0.740743
													98.235	0.856535
													73.092	0.637307
													124.364	1.08436
													94.049	0.820036
													103.284	0.900558
													38.027	0.331567
													97.914	0.853736
													95.037	0.828651
													130.757	1.1401
													88.186	0.768915
													109.339	0.953353
													117.482	1.02435
													116.806	1.01846
													95.17	0.82981
													113.658	0.991012
													74.503	0.64961
													79.746	0.695325
													114.76	1.00062
													132.179	1.1525
													71.271	0.621429
													109.502	0.954774
													118.19	1.03053
													76.662	0.668434
													102.641	0.894952
													100.131	0.873066
													103.126	0.89918
													143.551	1.25166
													92.971	0.810637
													111.053	0.968298
													112.491	0.980836
													86.665	0.755653
													119.606	1.04287
													109.94	0.958593
													121.563	1.05994
													132.549	1.15573
													114.577	0.999025
													145.313	1.26702
													107.153	0.934293
													104.011	0.906897
													109.988	0.959012
													109.415	0.954016
													109.672	0.956257
													109.046	0.950798
													95.861	0.835835
													98.551	0.85929
													97.074	0.846412
													109.885	0.958114
													134.813	1.17547
													135.779	1.18389
													84.68	0.738345
													104.699	0.912896
													107.157	0.934328
													123.584	1.07756
													130.707	1.13967
													146.72	1.27929
													134.614	1.17373
													126.483	1.10284
													122.478	1.06792
													128.226	1.11803
													81.917	0.714254
													144.533	1.26022
													117.06	1.02067
													127.144	1.1086
													131.873	1.14983
													116.146	1.01271
													121.777	1.0618
													126.363	1.10179
													122.458	1.06774
													114.59	0.999138
													161.767	1.41049
													78.249	0.682272
													151.868	1.32417
													133.14	1.16088
													98.66	0.86024
													122.616	1.06912
													110.351	0.962177
													123.343	1.07546
													137.693	1.20058
													93.101	0.81177
													124.945	1.08943
													115.308	1.0054
													114.424	0.99769
													102.293	0.891917
													86.817	0.756978
													138.066	1.20383
													98.19	0.856142
													142.29	1.24066
													137.791	1.20143
													119.172	1.03909
													81.057	0.706756
													129.11	1.12574
													132.541	1.15566
													106.943	0.932462
													132.93	1.15905
													134.99	1.17701
													82.5	0.719337
													114.727	1.00033
													89.619	0.78141
													103.177	0.899625
													110.873	0.966728
													124.241	1.08329
													122.738	1.07018
													114.165	0.995432
													98.554	0.859316
													98.949	0.86276
													111.503	0.972222
													92.727	0.808509
													113.843	0.992625
													115.78	1.00951
													108.011	0.941774
													92.268	0.804507
													125.056	1.09039
													136.309	1.18851
													85.867	0.748695
													102.449	0.893278
													94.314	0.822347
													126.237	1.10069
													94.704	0.825747
													83.182	0.725284
													134.938	1.17656
													108.45	0.945602
													141.118	1.23044
													108.557	0.946535
													118.196	1.03058
													107.071	0.933578
													118.24	1.03096
													132.862	1.15846
													105.784	0.922356
													141.392	1.23283
													127.948	1.11561
													145.315	1.26704
													121.836	1.06232
													112.246	0.9787
													147.128	1.28284
													64.463	0.562068
													95.575	0.833341
													82.213	0.716835
													71.409	0.622632
													119.841	1.04492
													115.889	1.01046
													105.321	0.918319
													81.414	0.709868
													125.769	1.09661
													135.729	1.18345
													112.41	0.98013
													141.866	1.23696
													91.145	0.794715
													73.662	0.642277
													86.158	0.751232
													92.366	0.805361
													158.666	1.38345
													80.881	0.705221
													98.731	0.860859
													105.164	0.91695
													133.651	1.16534
													92.282	0.804629
													150.805	1.31491
													86.908	0.757772
													134.683	1.17433
													117.783	1.02698
													54.188	0.472478
													123.745	1.07896
													87.309	0.761268
													83.655	0.729408
													112.772	0.983286
													110.063	0.959666
													113.709	0.991456
													77.497	0.675715
													145.375	1.26756
													88.212	0.769142
													83.746	0.730202
													93.529	0.815502
													116.857	1.0189
													108.665	0.947476
													84.414	0.736026
													110.856	0.96658
													120.495	1.05062
													100.38	0.875237
													87.158	0.759952
													103.752	0.904639
													182.525	1.59148
													122.836	1.07104
													91.478	0.797619
													97.255	0.84799
													83.406	0.727237
													100.463	0.875961
													89.087	0.776771
													150.431	1.31164
													98.348	0.85752
													140.198	1.22242
													134.355	1.17147
													107.725	0.93928
													93.579	0.815938
													72.329	0.630654
													98.62	0.859892
													120.77	1.05302
													124.054	1.08166
													104.581	0.911867
													118.538	1.03356
													114.683	0.999949
													136.805	1.19284
													106.654	0.929942
													92.65	0.807838
													75.893	0.661729
													84.216	0.7343
													112.188	0.978194
													143.773	1.25359
													138.541	1.20797
													122.377	1.06703
													111.597	0.973041
													114.563	0.998902
													157.556	1.37377
													119	1.03759
													101.253	0.882849
													127.284	1.10982
													113.15	0.986582
													125.72	1.09618
													96.152	0.838372
													86.377	0.753142
													140.057	1.22119
													132.6	1.15617
													113.176	0.986809
													87.252	0.760771
													91.407	0.797
													112.616	0.981926
													154.252	1.34496
													112.833	0.983818
													112.94	0.984751
													84.758	0.739025
													90.663	0.790513
													105.78	0.922321
													92.338	0.805117
													123.452	1.07641
													106.502	0.928617
													112.416	0.980182
													105.729	0.921877
													96.287	0.83955
													129.929	1.13288
													95.433	0.832103
													133.468	1.16374
													86.191	0.75152
													128.866	1.12361
													88	0.767293
													120.469	1.0504
													124.541	1.0859
													94.603	0.824866
													113.595	0.990462
													110.644	0.964732
													105.316	0.918276
													108.065	0.942245
													129.687	1.13077
													68.631	0.59841
													106.645	0.929863
													131.655	1.14793
													114.994	1.00266
													98.686	0.860467
													74.669	0.651057
													101.229	0.88264
													74.62	0.65063
													124.046	1.08159
													81.53	0.71088
													110.888	0.966859
													99.519	0.86773
													99.938	0.871384
													116.482	1.01563
													65.033	0.567038
													120.616	1.05168
													110.224	0.96107
													72.992	0.636435
													94.09	0.820393
													89.63	0.781506
													96.207	0.838852
													104.698	0.912887
													99.405	0.866736
													60.585	0.528255
													128.638	1.12163
													92.841	0.809503
													130.577	1.13853
													104.654	0.912503
													93	0.810889
													106.279	0.926672
													105.563	0.920429
													91.526	0.798037
													97.316	0.848522
													82.12	0.716024
													92.938	0.810349
													125.502	1.09428
													115.774	1.00946
													100.72	0.878202
													105.914	0.92349
													126.819	1.10577
													127.521	1.11189
													106.985	0.932828
													114.195	0.995694
													114.6	0.999225
													98.278	0.85691
													116.918	1.01944
													151.927	1.32469
													129.937	1.13295
													102.507	0.893783
													137.436	1.19834
													117.293	1.02271
													67.272	0.586561
													126.23	1.10063
													123.062	1.07301
													124.697	1.08726
													97.668	0.851591
													146.883	1.28071
													115.592	1.00787
													115.592	1.00787
													133.681	1.1656
													74.923	0.653272
													111.496	0.972161
													98.296	0.857067
													60.075	0.523808
													94.353	0.822687
													115.558	1.00758
													106.199	0.925975
													130.016	1.13364
													120.807	1.05335
													117.267	1.02248
													134.987	1.17698
													119.822	1.04476
													149.375	1.30244
													53.766	0.468799
													143.652	1.25254
													107.781	0.939769
													92.624	0.807611
													121.674	1.0609
													113.389	0.988666
													102.957	0.897707
													100.482	0.876127
													81.056	0.706747
													106.205	0.926027
													114.919	1.00201
													138.363	1.20642
													132.808	1.15799
													93.707	0.817054
													89.644	0.781628
													95.543	0.833062
													102.293	0.891917
													104.595	0.911989
													87.013	0.758687
													123.889	1.08022
													126.182	1.10021
													140.598	1.22591
													36.318	0.316665
													29.164	0.254288
													103.185	0.899695
													80.831	0.704785
													63.933	0.557447
													117.127	1.02126
													93.952	0.81919
													108.581	0.946744
													72.363	0.63095
													128.496	1.12039
													129.512	1.12925
													103.765	0.904752
													134.658	1.17412
													95.4	0.831816
													123.824	1.07965
													104.106	0.907725
													101.709	0.886825
													98.379	0.85779
													125.393	1.09333
													104.745	0.913297
													94.726	0.825939
													105.561	0.920412
													77.243	0.6735
													95.463	0.832365
													96.165	0.838486
													92.542	0.806896
													118.015	1.029
													105.216	0.917404
													100.648	0.877574
													88.403	0.770807
													109.764	0.957059
													82.407	0.718527
													98.27	0.85684
													58.333	0.50862
													120.876	1.05395
													112.61	0.981874
													135.251	1.17929
													77.245	0.673518
													16.523	0.144068
													110.597	0.964322
													85.753	0.747701
													104.166	0.908248
													173.699	1.51452
													146.753	1.27957
													91.392	0.796869
													97.696	0.851835
													101.078	0.881323
													148.503	1.29483
													138.694	1.20931
													142.099	1.239
													46.125	0.402175
													121.453	1.05898
													104.574	0.911806
													134.256	1.17061
													104.794	0.913724
													119.29	1.04012
													157.327	1.37177
													149.443	1.30303
													127.36	1.11048
													128.147	1.11734
													86.578	0.754894
													145.812	1.27137
													145.315	1.26704
													122.729	1.0701
													119.811	1.04466
													172.192	1.50138
													110.637	0.964671
													106.266	0.926559
													148.19	1.2921
													119.05	1.03803
													125.878	1.09756
													123.41	1.07604
													90.119	0.785769
													98.252	0.856683
													97.151	0.847083
													118.394	1.03231
													112.476	0.980705
													80.55	0.702335
													135.356	1.1802
													105.382	0.918851
													133.887	1.16739
													125.058	1.09041
													152.211	1.32716
													114.655	0.999705
													108.806	0.948706
													94.897	0.82743
													107.703	0.939088
													118.755	1.03545
													112.557	0.981412
													156.576	1.36522
													115.876	1.01035
													116.895	1.01924
													123.283	1.07493
													125.665	1.0957
													109.322	0.953205
													113.256	0.987506
													129.242	1.12689
													127.809	1.1144
													125.505	1.09431
													127.059	1.10786
													126.523	1.10318
													131.572	1.14721
													120.772	1.05304
													83.653	0.729391
													124.6	1.08642
													97.767	0.852454
													150.506	1.3123
													112.848	0.983949
													119.436	1.04139
													139.548	1.21675
													134.868	1.17595
													109.655	0.956108
													131.299	1.14483
													109.5	0.954757
													113.996	0.993959
													127.093	1.10815
													131.547	1.14699
													131.427	1.14594
													107.443	0.936821
													126.173	1.10013
													104.246	0.908946
													131.424	1.14592
													114.201	0.995746
													113.592	0.990436
													147.851	1.28915
													95.796	0.835268
													124.378	1.08448
													99.399	0.866684
													72.696	0.633854
													109.084	0.95113
													87.917	0.76657
													119.148	1.03888
													98.606	0.85977
													134.631	1.17388
													99.373	0.866457
													95.384	0.831676
													89.796	0.782953
													86.474	0.753988
													75.013	0.654056
													98.455	0.858453
													84.885	0.740133
													109.681	0.956335
													107.006	0.933011
													112.279	0.978988
													74.255	0.647447
													113.33	0.988152
													124.105	1.0821
													122.342	1.06673
													120.91	1.05424
													97.993	0.854425
													105.086	0.91627
													120.883	1.05401
													108.181	0.943256
													89.385	0.779369
													75	0.653943
													122.15	1.06506
													99.976	0.871715
													104.888	0.914544
													76.075	0.663316
													87.134	0.759742
													98.842	0.861827
													123.894	1.08026
													98.1	0.855358
													102.706	0.895518
													107.655	0.93867
													140.773	1.22743
													108.59	0.946822
													103.398	0.901552
													108.732	0.948061
													129.979	1.13332
													116.593	1.0166
													55.55	0.484354
													100.89	0.879684
													72.432	0.631552
													85.31	0.743838
													82.338	0.717925
													90.132	0.785883
													90.402	0.788237
													71.927	0.627149
													77.294	0.673945
													93.899	0.818728
													68.661	0.598672
													114.269	0.996339
													94.824	0.826793
													71.53	0.623687
													74.537	0.649906
													82.289	0.717498
													137.425	1.19824
													81.097	0.707104
													48.827	0.425734
													153.94	1.34224
													101.903	0.888517
													112.486	0.980793
													102.016	0.889502
													123.623	1.0779
													104.443	0.910664
													118.634	1.0344
													130.309	1.1362
													122.665	1.06955
													96.716	0.84329
													112.54	0.981263
													96.694	0.843098
													121.408	1.05859
													103.221	0.900009
													108.122	0.942742
													106.041	0.924597
													79.511	0.693276
													117.206	1.02195
													97.305	0.848426
													130.265	1.13581
													104.068	0.907394
													89.366	0.779204
													123.233	1.0745
													138.045	1.20365
													35.818	0.312306
													30.505	0.26598
													99.341	0.866178
													82.558	0.719843
													119.035	1.03789
													68.558	0.597774
													114.354	0.99708
													103.65	0.903749
													92.925	0.810236
													83.878	0.731353
													72.275	0.630183
													127.98	1.11589
													127.845	1.11471
													94.627	0.825076
													131.143	1.14347
													91.946	0.801699
													98.119	0.855523
													124.932	1.08931
													100.085	0.872665
													97.603	0.851024
													96.613	0.842392
													120.482	1.05051
													94.239	0.821693
													79.536	0.693494
													90.711	0.790931
													90.893	0.792518
													111.935	0.975988
													95.068	0.828921
													84.479	0.736593
													102.408	0.89292
													83.26	0.725964
													118.693	1.03491
													106.072	0.924867
													74.871	0.652818
													107.261	0.935235
													174.784	1.52398
													108.581	0.946744
													141.065	1.22998
													75.25	0.656123
													106	0.92424
													109.098	0.951252
													59.907	0.522344
													87.468	0.762655
													147.034	1.28202
													93.364	0.814063
													120.75	1.05285
													112.833	0.983818
													95.095	0.829156
													96.932	0.845174
													125.863	1.09743
													81.143	0.707505
													116.688	1.01743
													102.435	0.893155
													104.323	0.909617
													141.82	1.23656
													126.273	1.101
													113.034	0.985571
													81.002	0.706276
													96.069	0.837649
													115.955	1.01104
													149.868	1.30674
													111.589	0.972971
													120.922	1.05435
													106.645	0.929863
													130.293	1.13606
													90.991	0.793372
													126.876	1.10626
													59.264	0.516737
													152.02	1.3255
													98.908	0.862403
													112.195	0.978255
													131.233	1.14425
													101.197	0.882361
													117.922	1.02819
													128.058	1.11657
													111.316	0.970591
													128.47	1.12016
													103.476	0.902232
													77.096	0.672219
													60.829	0.530383
													93.307	0.813566
													145.444	1.26816
													131.205	1.14401
													83.178	0.725249
													107.306	0.935627
													88.059	0.767808
													121.541	1.05975
													105.521	0.920063
													100.078	0.872604
													160.394	1.39851
													88.403	0.770807
													131.886	1.14995
													128.063	1.11661
													94.226	0.821579
													101.958	0.888996
													108.423	0.945366
													121.651	1.0607
													146.586	1.27812
													100.126	0.873023
													92.087	0.802929
													156.011	1.3603
													86.062	0.750395
													107.382	0.93629
													133.725	1.16598
													108.021	0.941861
													79.917	0.696816
													133.271	1.16202
													115.762	1.00936
													130.951	1.14179
													123.876	1.0801
													122.789	1.07063
													98.693	0.860528
													78.195	0.681801
													128.917	1.12406
													146.75	1.27955
													138.836	1.21054
													131.328	1.14508
													147.552	1.28654
													119.665	1.04339
													85.391	0.744545
													113.845	0.992642
													111.859	0.975326
													117.725	1.02647
													109.969	0.958846
													152.054	1.3258
													112.439	0.980383
													135.107	1.17803
													118.557	1.03373
													105.063	0.91607
													94.175	0.821135
													107.468	0.937039
													69.244	0.603755
													101.891	0.888412
													135.878	1.18475
													126.062	1.09917
													99.684	0.869169
													119.844	1.04495
													117.766	1.02683
													110.825	0.96631
													105.51	0.919967
													111.667	0.973652
													164.794	1.43688
													114.013	0.994107
													73.126	0.637603
													129.567	1.12973
													117.854	1.0276
													141.058	1.22992
													96.506	0.841459
													95.479	0.832504
													85.519	0.745661
													105.285	0.918005
													93.828	0.818109
													126.5	1.10298
													129.695	1.13084
													69.343	0.604618
													75.368	0.657152
													167.624	1.46155
													93.543	0.815624
													97.389	0.849158
													84.783	0.739243
													99.514	0.867687
													106.878	0.931895
													110.263	0.96141
													74.219	0.647133
													111.151	0.969152
													97.31	0.848469
													96.783	0.843874
													95.677	0.834231
													103.157	0.899451
													129.604	1.13005
													76.216	0.664546
													97.922	0.853806
													109.556	0.955245
													94.552	0.824422
													90.767	0.791419
													96.093	0.837858
													89.89	0.783773
													90.855	0.792187
													113.73	0.991639
													106.5	0.928599
													83.473	0.727821
													95.437	0.832138
													103.737	0.904508
													119.72	1.04387
													105.294	0.918084
													114.386	0.997359
													130.465	1.13756
													76.902	0.670527
													103.841	0.905415
													126.586	1.10373
													93.789	0.817769
													43.289	0.377447
													96.975	0.845548
													88.563	0.772202
													97.711	0.851966
													146.812	1.28009
													106.249	0.926411
													110.828	0.966336
													124.203	1.08296
													106.96	0.93261
													106.427	0.927963
													132.053	1.1514
													77.305	0.674041
													109.781	0.957207
													151.275	1.319
													113.975	0.993776
													102.548	0.894141
													99.436	0.867006
													123.202	1.07423
													128.252	1.11826
													119.706	1.04375
													110.237	0.961183
													75.719	0.660212
													127.102	1.10823
													131.5	1.14658
													95.234	0.830368
													110.065	0.959683
													139.768	1.21867
													117.839	1.02747
													126.176	1.10016
													158.202	1.3794
													101.264	0.882945
													101.559	0.885517
													98.677	0.860389
													100.512	0.876388
													148.331	1.29333
													114.183	0.995589
													81	0.706259
													114.418	0.997638
													91.067	0.794035
													93.772	0.817621
													105.011	0.915616
													88.836	0.774583
													94.614	0.824962
													106.551	0.929044
													99.052	0.863658
													98.996	0.86317
													108.621	0.947093
													105.604	0.920787
													109.183	0.951993
													75.293	0.656498
													116.662	1.0172
													116.212	1.01328
													106.199	0.925975
													123.591	1.07762
													112.785	0.9834
													120.495	1.05062
[truncated: 10 more columns]

## Sheet: F5J
SOX2 and pSMAD1/5 level analysis of hESCs cultured in YSLC conditioned medium in 2D in the presence of BMP4
units= fluorescence intensity (a.u.)
		Exp 1	62.5087	40.5366	1	1			20.3511	69.4263	0.325571	1.71268			68.2613	28.2875	1.09203	0.697826			Exp 2	38.1027	20.1862	1	1			4.49761	48.856	0.118039	2.42026			27.5648	27.6319	0.723435	1.36885				Exp 3	79.9459	52.5806	1	1			20.1249	125.753
		Control	SOX2	PSMAD	SOX2	PSMAD		+ BMP4	SOX2	PSMAD	SOX2	PSMAD		+ BMP4 + YSLC CM	SOX2	PSMAD	SOX2	PSMAD			Control	SOX2	PSMAD	SOX2	PSMAD		+ BMP4	SOX2	PSMAD	SOX2	PSMAD		+ BMP4 + YSLC CM	SOX2	PSMAD	SOX2	PSMAD				Control	SOX2	PSMAD	SOX2	PSMAD		+ BMP4	SOX2	PSMAD
			69.619	55.801	1.11375	1.37656			16.833	62.619	0.26929	1.54475			74.9	34.843	1.19823	0.859544				31.324	18.467	0.822095	0.914832			3.507	49.589	0.0920408	2.45658			28.422	28.568	0.745932	1.41522					93.49	50.072	1.16942	0.95229			23.691	128.157
			58.78	39.873	0.940349	0.98363			16.668	93.253	0.266651	2.30046			69.127	25.084	1.10588	0.618799				35.079	19.441	0.920644	0.963082			4.406	50.773	0.115635	2.51523			26.306	27.355	0.690398	1.35513					93.87	48.9	1.17417	0.930001			27.155	102.6
			74.055	43.858	1.18471	1.08194			15.319	57.638	0.24507	1.42188			78.199	31.542	1.25101	0.778112				35.687	18.518	0.936601	0.917358			2.867	48.088	0.0752441	2.38222			26.673	28.781	0.70003	1.42577					104.437	56.811	1.30635	1.08046			21.539	119.359
			58.113	40.213	0.929678	0.992017			14.583	58.558	0.233295	1.44457			65.03	30.453	1.04033	0.751247				33.198	19.875	0.871278	0.984582			4.081	43.635	0.107105	2.16162			24.53	27.689	0.643787	1.37168					122.895	55.795	1.53723	1.06113			24.613	93.851
			64.028	48.291	1.0243	1.19129			13.634	44.943	0.218114	1.1087			79.369	32.409	1.26973	0.7995				40.642	22.16	1.06664	1.09778			4.236	45.894	0.111173	2.27353			35.493	29.427	0.93151	1.45778					83.188	48.857	1.04055	0.929183			24.991	141.023
			79.672	58.209	1.27457	1.43596			31.202	66.768	0.499162	1.6471			89.441	35.428	1.43086	0.873976				29.286	17.096	0.768608	0.846914			3.336	62.771	0.0875529	3.1096			31.028	27.754	0.814326	1.3749					99.937	54.265	1.25006	1.03203			22.89	132.966
			55.95	35.432	0.895075	0.874074			15.315	49.499	0.245006	1.22109			85.654	30.624	1.37027	0.755465				33.384	20.006	0.876159	0.991072			3.231	47.34	0.0847972	2.34516			26.695	26.729	0.700607	1.32412					86.048	41.655	1.07633	0.792212			22.14	108.634
			59.645	39.837	0.954187	0.982742			5.99	53.115	0.0958266	1.3103			66.925	24.503	1.07065	0.604466				39.314	19.624	1.03179	0.972148			3.096	42.683	0.0812542	2.11446			31.951	27.617	0.83855	1.36811					127.041	53.25	1.58909	1.01273			23.112	88.163
			62.422	41.662	0.998612	1.02776			19.498	77.374	0.311924	1.90874			71.323	33.04	1.14101	0.815066				33.905	17.588	0.889833	0.871287			3.902	49.535	0.102408	2.4539			22.776	25.442	0.597753	1.26036					102.863	49.339	1.28666	0.93835			22.251	104.417
			79.92	43.416	1.27854	1.07103			15.405	64.874	0.246446	1.60038			66.473	26.639	1.06342	0.657159				35.66	17.31	0.935892	0.857515			4.455	37.537	0.116921	1.85954			28.156	26.04	0.738951	1.28999					107.841	51.955	1.34892	0.988102			24.996	124.455
			62.646	40.401	1.0022	0.996655			15.427	74.246	0.246797	1.83158			76.112	28.532	1.21762	0.703858				46.971	20.541	1.23275	1.01758			1.12	36.522	0.0293943	1.80925			32.015	28.715	0.84023	1.4225					76.816	45.561	0.96085	0.866498			21.464	113.715
			72.189	54.871	1.15486	1.35362			16.36	88.449	0.261723	2.18195			84.607	31.098	1.35352	0.767159				41.403	16.493	1.08662	0.817042			3.84	44.636	0.10078	2.21121			25.873	25.989	0.679034	1.28746					89.196	46.394	1.1157	0.882341			20.017	89.767
			53.469	39.952	0.855384	0.985579			13.624	58.83	0.217954	1.45128			72.259	26.04	1.15598	0.642382				34.765	16.639	0.912403	0.824275			3.156	33.965	0.0828288	1.68258			22.252	23.266	0.584001	1.15257					104.892	49.963	1.31204	0.950217			24.386	128.211
			67.352	45.999	1.07748	1.13475			5.108	35.941	0.0817166	0.886631			78.422	31.547	1.25458	0.778235				30.384	16.465	0.797424	0.815655			3.789	51.932	0.0994419	2.57265			29.292	25.837	0.768765	1.27993					93.988	47.588	1.17564	0.905049			25.502	144.678
			63.886	43.805	1.02203	1.08063			12.633	47.907	0.2021	1.18182			65.047	30.699	1.04061	0.757316				36.472	20.584	0.957203	1.01971			3.443	63.546	0.0903611	3.14799			25.641	26.916	0.672945	1.33338					71.764	38.904	0.897657	0.739893			22.555	118.895
			76.081	49.074	1.21713	1.21061			7.912	41.086	0.126574	1.01355			76.981	31.493	1.23152	0.776903				45.478	20.725	1.19356	1.02669			3.423	35.656	0.0898362	1.76635			28.254	26.699	0.741523	1.32263					79.447	44.33	0.993759	0.843087			20.698	116.679
			61.204	41.262	0.979127	1.01789			18.675	79.582	0.298758	1.96321			94.126	32.104	1.50581	0.791976				29.054	16.712	0.762519	0.827891			4.597	57.359	0.120648	2.84149			25.352	24.993	0.66536	1.23812					70.295	42.591	0.879282	0.810013			22.627	132.359
			46.836	39.332	0.749271	0.970284			15.691	56.905	0.251021	1.40379			81.133	32.411	1.29795	0.799549				38.338	17.677	1.00618	0.875696			4.444	52.126	0.116632	2.58226			24.033	25.605	0.630743	1.26844					83.495	43.495	1.04439	0.827206			22.416	123.294
			46.558	34.556	0.744824	0.852464			6.517	43.513	0.104257	1.07343			59.902	27.119	0.958298	0.669				41.326	19.02	1.0846	0.942227			1.59	33.371	0.0417294	1.65316			31.938	28.079	0.838209	1.391					102.805	39.349	1.28593	0.748356			23.174	137.555
			41.523	35.518	0.664275	0.876196			14.214	65.044	0.227392	1.60457			81.322	31.598	1.30097	0.779493				32.589	18.249	0.855294	0.904032			3.898	45.704	0.102303	2.26412			23.312	25.251	0.611821	1.2509					75.394	44.566	0.943063	0.847575			21.175	118.563
			37.982	34.84	0.607627	0.85947			14.178	62.032	0.226816	1.53027			83.177	32.7	1.33065	0.806678				34.311	18.225	0.900488	0.902843			3.974	30.085	0.104297	1.49037			27.232	26.325	0.714701	1.30411					77.768	44.583	0.972758	0.847898			22.311	139.051
			37.867	36.891	0.605787	0.910066			18.676	89.375	0.298774	2.2048			83.184	29.774	1.33076	0.734497				29.276	16.724	0.768345	0.828486			3.147	62.746	0.0825926	3.10836			26.328	27.625	0.690975	1.36851					67.702	43.623	0.846848	0.82964			26.031	147.529
			44.379	36.84	0.709965	0.908808			26.549	76.34	0.424725	1.88324			69.47	28.936	1.11136	0.713824				39.799	21.248	1.04452	1.0526			3.027	50.357	0.0794433	2.49462			24.586	23.404	0.645257	1.1594					75.562	43.309	0.945164	0.823669			24.91	152.817
			43.747	37.074	0.699854	0.914581			22.456	79.607	0.359246	1.96383			83.51	33.121	1.33597	0.817064				38.19	20.871	1.00229	1.03392			4.401	37.154	0.115504	1.84056			24.745	23.565	0.64943	1.16738					60.482	39.997	0.756536	0.76068			24.427	112.108
			37.132	38.64	0.594029	0.953213			22.871	81.853	0.365885	2.01924			71.495	29.776	1.14376	0.734546				34.167	18.462	0.896709	0.914584			4.483	36.623	0.117656	1.81426			29.547	26.011	0.775457	1.28855					60.758	38.091	0.759989	0.724431			19.22	141.314
			41.611	35.33	0.665683	0.871558			16.998	77.423	0.27193	1.90995			54.005	29.409	0.863959	0.725493				39.325	19.813	1.03208	0.981511			4.125	43.797	0.10826	2.16965			32.182	26.674	0.844613	1.3214					71.551	39.744	0.894993	0.755868			22.038	160.528
			20.998	23.481	0.335921	0.579254			14.688	69.246	0.234975	1.70823			86.643	31.071	1.38609	0.766493				28.96	16.97	0.760052	0.840672			3.952	34.86	0.10372	1.72692			23.609	24.061	0.619615	1.19195					65.532	41.081	0.819704	0.781296			21.939	141.289
			37.467	33.381	0.599388	0.823478			15.847	44.295	0.253517	1.09272			75.276	29.978	1.20425	0.739529				38.016	18.632	0.997725	0.923006			3.733	46.131	0.0979721	2.28527			28.769	24.681	0.755039	1.22267					56.798	38.662	0.710455	0.73529			25.499	122.688
			40.321	33.727	0.645046	0.832014			19.917	60.779	0.318627	1.49936			63.576	27.517	1.01707	0.678819				38.054	17.886	0.998723	0.88605			4.035	35.724	0.105898	1.76972			26.113	24.239	0.685333	1.20077					81.49	43.607	1.01931	0.829336			21.937	120.466
			33.555	31.738	0.536805	0.782947			14.645	71.892	0.234287	1.77351			6.967	6.93	0.111456	0.170957				37.199	17.461	0.976283	0.864996			3.892	47.032	0.102145	2.32991			24.151	26.183	0.63384	1.29707					78.009	40.182	0.975772	0.764198			21.919	123.819
			33.653	30.635	0.538373	0.755737			18.027	65.992	0.288392	1.62796			63.084	27.965	1.0092	0.68987				36.274	17.67	0.952007	0.875349			2.99	57.869	0.0784722	2.86676			30.108	26.508	0.790181	1.31317					77.468	37.668	0.969005	0.716386			22.684	144.684
			29.933	31.495	0.478861	0.776952			18.203	56.341	0.291207	1.38988			54.644	32.954	0.874182	0.812944				27.359	16.52	0.718034	0.81838			3.574	38.96	0.0937992	1.93003			22.755	26.247	0.597202	1.30024					76.328	41.372	0.954745	0.78683			22.842	148.944
			48.687	36.498	0.778883	0.900372			16.434	59.317	0.262907	1.46329			78.695	30.616	1.25894	0.755268				36.954	20.879	0.969853	1.03432			3.664	33.729	0.0961612	1.67089			26.13	24.625	0.685779	1.21989					76.648	44.35	0.958748	0.843467			21.722	138.706
			27.043	34.222	0.432628	0.844225			14.101	62.178	0.225584	1.53387			77.668	27.536	1.24251	0.679287				42.656	20.026	1.1195	0.992063			4.318	57.601	0.113325	2.85348			22.822	22.591	0.598961	1.11913					63.02	40.762	0.788283	0.775229			21.541	135.583
			32.873	30.223	0.525894	0.745573			17.094	76.225	0.273466	1.8804			79.806	28.892	1.27672	0.712739				38.592	18.899	1.01284	0.936232			3.91	42.754	0.102617	2.11798			22.682	22.974	0.595286	1.1381					60.086	39.102	0.751583	0.743658			22.473	133.517
			32.012	31.515	0.51212	0.777446			21.811	72.041	0.348927	1.77718			52.782	31.247	0.844394	0.770834				36.275	19.547	0.952033	0.968334			4.078	42.064	0.107027	2.0838			31.039	26.607	0.814615	1.31808					80.306	37.648	1.0045	0.716005			21.666	136.925
			27.117	27.105	0.433811	0.668655			24.039	61.247	0.38457	1.51091			79.891	31.355	1.27808	0.773499				36.835	20.075	0.96673	0.99449			5.512	42.606	0.144662	2.11065			22.68	23.806	0.595234	1.17932					64.364	38.733	0.805094	0.73664			22.898	196.984
			37.38	33.097	0.597996	0.816472			24.767	75.149	0.396217	1.85386			62.895	31.05	1.00618	0.765974				39.878	20.935	1.04659	1.03709			5.001	45.704	0.131251	2.26412			21.926	24.994	0.575445	1.23817					64.541	38.347	0.807308	0.729299			22.111	128.643
			31.865	28.763	0.509769	0.709556			15.036	57.059	0.240542	1.40759			86.111	31.708	1.37758	0.782207				32.542	18.903	0.854061	0.936431			5.091	49.371	0.133613	2.44578			25.595	23.06	0.671738	1.14236					52.35	38.257	0.654818	0.727588			15.325	104.853
			39.568	33.705	0.632999	0.831471			20.634	83.3	0.330098	2.05493			80.39	32.044	1.28606	0.790496				34.012	18.936	0.892641	0.938065			4.614	55.051	0.121094	2.72716			25.412	24.048	0.666935	1.19131					52.729	39.404	0.659558	0.749402			21.471	156.096
			43.422	36.702	0.694655	0.905404			15.305	39.776	0.244846	0.981237			99.436	33.137	1.59075	0.817459				37.295	19.198	0.978803	0.951045			3.462	46.939	0.0908598	2.3253			10.659	14.838	0.279744	0.735056					68.967	39.431	0.862671	0.749915			20.239	143.177
			31.219	31.266	0.499434	0.771303			32.366	120.966	0.517784	2.98412			71.512	27.885	1.14403	0.687897				39.412	19.515	1.03436	0.966748			2.614	57.627	0.0686041	2.85477			10.177	13.65	0.267094	0.676204					67.857	39.878	0.848786	0.758417			20.693	185.135
			30.533	27.204	0.48846	0.671097			25.611	103.681	0.409719	2.55771			74.313	26.868	1.18884	0.662808				38.287	21.275	1.00484	1.05394			3.444	50.537	0.0903874	2.50354			23.721	23.396	0.622555	1.15901					59.352	41.518	0.742402	0.789607			22.296	133.706
			33.983	31.754	0.543652	0.783342			21.609	49.361	0.345696	1.21769			84.869	31.475	1.35771	0.776459				36.215	20.409	0.950458	1.01104			4.271	68.889	0.112092	3.41267			24.738	26.041	0.649246	1.29004					61.839	42.057	0.77351	0.799858			26.454	144.822
			35.767	32.05	0.572192	0.790644			23.634	55.167	0.378091	1.36092			63.664	27.222	1.01848	0.671541				33.557	21.287	0.880699	1.05453			2.913	59.159	0.0764513	2.93066			26.735	25.187	0.701657	1.24773					56.927	37.824	0.712069	0.719353			15.943	104.222
			45.896	34.996	0.734233	0.863319			24.35	66.95	0.389546	1.65159			79.853	29.985	1.27747	0.739702				34.074	18.961	0.894268	0.939304			3.276	57.327	0.0859782	2.83991			27.745	25.145	0.728164	1.24565					62.313	39.678	0.779439	0.754613			25.213	156.494
			32.574	26.906	0.521111	0.663746			18.212	73.704	0.291351	1.81821			73.906	26.745	1.18233	0.659774				41.474	21.966	1.08848	1.08817			3.683	40.91	0.0966599	2.02663			22.087	22.291	0.579671	1.10427					65.088	38.859	0.81415	0.739037			10.694	75.578
			31.754	31.599	0.507993	0.779518			28.456	42.314	0.455232	1.04385			55.669	25.296	0.890579	0.624029				36.051	22.939	0.946154	1.13637			3.838	54.412	0.100728	2.6955			22.756	24.279	0.597229	1.20275					73.883	40.017	0.924162	0.76106			21.214	156.727
			34.444	29.423	0.551027	0.725838			24.959	62.064	0.399288	1.53106			55.766	30.224	0.892131	0.745598				41.544	24.589	1.09032	1.21811			3.825	61.133	0.100387	3.02845			24.076	25.054	0.631872	1.24114					68.35	40.315	0.854953	0.766728			21.585	147.39
			30.859	31.05	0.493675	0.765974			23.83	93.216	0.381227	2.29955			20.481	16.252	0.32765	0.400922				46.203	25.843	1.21259	1.28023			4.413	59.153	0.115819	2.93036			24.893	21.567	0.653314	1.0684					80.481	39.699	1.00669	0.755012			28.405	148.368
			22.061	25.608	0.352927	0.631725			23.555	62.501	0.376827	1.54184			89.101	31.804	1.42542	0.784575				41.678	23.79	1.09383	1.17853			3.653	66.452	0.0958726	3.29195			18.297	22.585	0.480203	1.11883					83.672	41.642	1.04661	0.791965			26.299	159.378
			28.688	26.928	0.458944	0.664289			19.619	62.373	0.31386	1.53868			45.521	24.815	0.728234	0.612163				45.874	25.843	1.20396	1.28023			4.848	52.996	0.127235	2.62535			22.484	22.573	0.59009	1.11824					68.058	41.463	0.851301	0.788561			16.824	105.073
			40.557	39.162	0.648821	0.96609			25.587	59.141	0.409335	1.45895			59.596	27.278	0.953403	0.672923				48.704	25.324	1.27823	1.25452			3.612	39.665	0.0947965	1.96495			17.48	20.868	0.458761	1.03377					75.54	40.676	0.944889	0.773593			10.634	72.463
			34.386	31.971	0.550099	0.788695			21.23	50.753	0.339633	1.25203			83.976	32.572	1.34343	0.803521				36.752	22.883	0.964552	1.13359			4.168	56.651	0.109389	2.80642			21.505	24.341	0.564396	1.20582					74.428	39.018	0.930979	0.742061			23.183	159.717
			39.655	29.602	0.634391	0.730254			17.324	66.583	0.277145	1.64254			34.755	19.534	0.556002	0.481886				49.715	23.337	1.30476	1.15609			3.986	62.075	0.104612	3.07512			23.472	21.101	0.61602	1.04532					48.899	31.735	0.611651	0.60355			22.777	148.036
			54.66	39.926	0.874438	0.984937			12.948	52.845	0.207139	1.30364			62.372	25.599	0.997812	0.631503				46.696	25.71	1.22553	1.27364			4.704	57.221	0.123456	2.83466			20.012	24.818	0.525213	1.22945					97.962	45.874	1.22535	0.872451			26.778	147.901
			37.057	31.769	0.592829	0.783712			24.017	65.236	0.384218	1.60931			80.572	27.363	1.28897	0.67502				44.599	25.627	1.1705	1.26953			3.831	61.092	0.100544	3.02642			25.556	24.067	0.670714	1.19225					74.876	38.38	0.936583	0.729927			21.891	135.072
			36.357	30.749	0.581631	0.758549			19.215	76.55	0.307397	1.88842			86.048	30.538	1.37658	0.753344				32.729	25.171	0.858969	1.24694			5.231	52.418	0.137287	2.59672			23.965	24.628	0.628959	1.22004					73.762	39.062	0.922649	0.742897			22.942	139.926
			38.551	31.689	0.61673	0.781738			18.476	65.016	0.295575	1.60388			66.144	28.144	1.05816	0.694286				37.325	23.642	0.97959	1.17119			4.087	47.7	0.107263	2.363			22.739	23.238	0.596782	1.15118					57.897	38.003	0.724202	0.722757			23.736	108.076
			41.129	34.01	0.657972	0.838995			16.472	96.546	0.263515	2.3817			76.139	30.701	1.21805	0.757365				42.305	22.337	1.11029	1.10655			4.722	63.4	0.123928	3.14076			28.482	26.024	0.747507	1.2892					72.09	42.073	0.901735	0.800162			26.111	142.48
			43.068	33.865	0.688992	0.835418			16.025	79.746	0.256364	1.96726			61.29	30.33	0.980503	0.748213				33.307	23.244	0.874138	1.15148			4.625	66.001	0.121383	3.26961			26.043	27.402	0.683495	1.35746					66.93	41.64	0.837191	0.791927			26.334	166.595
			36.648	29.907	0.586286	0.737778			18.388	91.433	0.294167	2.25557			77.452	26.389	1.23906	0.650992				46.718	24.913	1.22611	1.23416			4.497	32.225	0.118023	1.59639			22.882	22.042	0.600535	1.09193					115.216	53.292	1.44117	1.01353			22.167	130.615
			37.305	30.781	0.596797	0.759339			18.065	66.791	0.289	1.64767			57.071	25.138	0.913008	0.620131				39.725	20.733	1.04258	1.02709			4.834	42.958	0.126868	2.12808			32.385	23.96	0.84994	1.18695					50.946	35.565	0.637256	0.67639			24.438	105.468
			37.422	33.501	0.598668	0.826438			18.126	101.872	0.289975	2.51309			83.182	30.497	1.33073	0.752332				42.283	23.835	1.10971	1.18076			4.892	57.007	0.12839	2.82405			20.702	21.853	0.543322	1.08257					63.543	39.42	0.794825	0.749706			22.868	113.508
			32.262	32.099	0.51612	0.791852			5.746	31.512	0.0919231	0.777372			79.26	30.662	1.26798	0.756403				43.241	21.821	1.13485	1.08098			6.464	50.207	0.169647	2.48719			19.669	22.472	0.516211	1.11323					87.348	44.486	1.09259	0.846053			24.472	159.207
			27.521	27.321	0.440274	0.673984			18.638	49.1	0.298166	1.21125			94.247	34.871	1.50774	0.860235				35.164	18.102	0.922875	0.89675			5.991	44.977	0.157233	2.2281			23.716	22.708	0.622424	1.12493					80.34	40.338	1.00493	0.767165			23.073	148.221
			39.002	30.871	0.623945	0.761559			17.95	84.258	0.28716	2.07857			68.37	30.235	1.09377	0.745869				11.271	10.614	0.295806	0.525804			4.307	51.023	0.113037	2.52761			20.854	22.275	0.547311	1.10348					63.45	44.009	0.793662	0.836982			21.05	116.43
			41.808	35.186	0.668834	0.868006			15.87	78.567	0.253885	1.93817			93.149	31.235	1.49018	0.770538				38.389	19.001	1.00751	0.941285			4.445	45.595	0.116658	2.25872			25.104	24.594	0.658851	1.21836					57.31	34.947	0.71686	0.664637			18.749	117.947
			39.161	31.181	0.626488	0.769206			16.106	92.144	0.25766	2.27311			97.762	32.254	1.56397	0.795676				36.486	22.363	0.957571	1.10783			5.138	53.042	0.134846	2.62763			22.689	24.356	0.59547	1.20657					59.596	36.977	0.745454	0.703244			22.057	126.903
			23.679	28.854	0.378811	0.711801			25.019	69.706	0.400248	1.71958			86.369	31.081	1.38171	0.766739				43.727	21.074	1.14761	1.04398			6.203	36.709	0.162797	1.81852			22.053	21.61	0.578778	1.07053					65.612	37.591	0.820705	0.714921			23.622	125.993
			34.154	30.275	0.546388	0.746856			9.023	44.77	0.144348	1.10443			78.76	30.207	1.25998	0.745178				35.414	18.368	0.929436	0.909927			9.449	64.448	0.247988	3.19267			24.008	21.618	0.630087	1.07093					63.755	39.376	0.797477	0.748869			23.989	114.147
			37.701	31.606	0.603132	0.77969			16.289	82.088	0.260588	2.02503			92.846	29.278	1.48533	0.722261				42.204	22.27	1.10764	1.10323			5.732	43.589	0.150436	2.15934			25.527	24.361	0.669953	1.20681					70.71	39.105	0.884473	0.743715			14.196	109.257
			35.192	28.42	0.562993	0.701095			8.695	53.738	0.139101	1.32567			79.223	28.871	1.26739	0.712221				12.296	11.185	0.322707	0.554091			9.061	65.062	0.237805	3.22309			22.827	24.172	0.599092	1.19745					57.778	40.351	0.722714	0.767412			19.566	130.376
			44.582	34.986	0.713212	0.863072			19.414	72.278	0.310581	1.78303			80.937	29.78	1.29481	0.734645				31.717	16.354	0.832409	0.810156			4.086	46.014	0.107237	2.27948			16.155	20.247	0.423986	1.00301					88.583	44.105	1.10804	0.838807			14.094	101.922
			35.866	30.136	0.573776	0.743427			18.781	55.049	0.300454	1.35801			86.051	30.197	1.37662	0.744932				34.073	15.915	0.894242	0.788409			4.184	48.803	0.109809	2.41764			23.779	22.201	0.624077	1.09981					80.83	45.06	1.01106	0.85697			19.043	120.26
			33.067	29.903	0.528998	0.737679			25.675	73.859	0.410743	1.82203			87.651	29.727	1.40222	0.733337				35.681	20.521	0.936444	1.01658			4.596	55.385	0.120621	2.7437			21.409	22.381	0.561877	1.10873					69.701	42.183	0.871852	0.802254			21.05	127.702
			36.817	32.236	0.58899	0.795232			38.232	98.505	0.611626	2.43003			57.295	30.28	0.916592	0.746979				33.154	15.606	0.870123	0.773101			4.291	38.274	0.112617	1.89605			22.751	25.212	0.597097	1.24897					80.223	42.312	1.00347	0.804707			25.533	158.614
			34.081	28.033	0.54522	0.691548			21.792	79.599	0.348623	1.96363			75.727	28.587	1.21146	0.705215				26.329	15.009	0.691001	0.743527			4.734	48.623	0.124243	2.40872			17.842	23.946	0.468261	1.18625					80.927	43.271	1.01227	0.822946			18.138	86.037
			31.771	34.677	0.508265	0.855449			20.721	85.602	0.33149	2.11172			80.857	27.426	1.29353	0.676574				45.052	23.02	1.18238	1.14038			6.988	58.492	0.183399	2.89762			24.598	25.549	0.645572	1.26566					70.652	39.961	0.883747	0.759995			15.972	117.03
			20.412	23.767	0.326546	0.58631			24.329	89.75	0.38921	2.21405			100.041	31.977	1.60043	0.788843				34.628	17.357	0.908808	0.859844			3.598	44.009	0.0944291	2.18015			25.034	25.543	0.657014	1.26537					63.464	41.085	0.793837	0.781372			19.354	109.968
			30.804	28.153	0.492795	0.694508			22.942	84.003	0.367021	2.07228			81.249	28.426	1.2998	0.701243				30.559	14.831	0.802017	0.734709			5.758	52.23	0.151118	2.58741			21.48	25.462	0.56374	1.26136					76.184	40.545	0.952944	0.771102			21.261	125.029
			40.552	28.025	0.648741	0.691351			7.658	61.902	0.122511	1.52706			113.931	33.493	1.82264	0.826241				36.528	16.863	0.958673	0.835372			4.538	53.535	0.119099	2.65206			21.758	25.314	0.571036	1.25402					76.397	47.351	0.955609	0.900541			24.633	112.642
			41.198	38.422	0.659076	0.947835			9.498	66.824	0.151947	1.64849			81.397	31.938	1.30217	0.787881				25.307	14.782	0.664179	0.732281			4.333	54.624	0.113719	2.706			15.805	21.683	0.4148	1.07415					87.697	49.758	1.09695	0.946318			24.763	149.301
			33.797	27.845	0.540676	0.68691			19.075	76.834	0.305157	1.89542			85.478	30.047	1.36746	0.741231				33.143	18.296	0.869834	0.906361			4.558	56.887	0.119624	2.81811			16.432	22.046	0.431256	1.09213					65.84	39.261	0.823557	0.746682			20.484	107.141
			49.802	37.987	0.796721	0.937104			17.513	69.968	0.280169	1.72605			82.518	31.061	1.3201	0.766246				37.299	21.056	0.978908	1.04309			4.549	55.824	0.119388	2.76545			18.478	21.422	0.484953	1.06122					93.99	52.299	1.17567	0.994644			25.272	131.113
			39.815	32.509	0.636951	0.801967			19.656	66.433	0.314452	1.63884			3.383	9.988	0.0541204	0.246395				25.765	14.842	0.676199	0.735254			5.487	57.159	0.144006	2.83158			18.751	22.797	0.492118	1.12933					87.181	48.614	1.0905	0.924561			9.696	82.347
			31.736	28.733	0.507705	0.708816			19.654	81.734	0.31442	2.0163			82.463	31.204	1.31922	0.769774				34.553	16.779	0.906839	0.83121			4.307	45.867	0.113037	2.27219			18.916	22.739	0.496448	1.12646					81.127	42.37	1.01477	0.80581			21.54	134.159
			32.723	27.17	0.523495	0.670259			15.106	74.274	0.241662	1.83227			62.901	32.108	1.00628	0.792074				27.331	15.333	0.717299	0.759577			5.067	52.719	0.132983	2.61163			21.455	24.141	0.563084	1.19591					89.14	55.038	1.115	1.04674			27.342	120.748
			27.825	27.62	0.445138	0.68136			22.28	94.74	0.35643	2.33715			100.774	32.683	1.61216	0.806259				33.744	16.451	0.885607	0.814962			11.988	48.214	0.314624	2.38846			12.322	19.377	0.323389	0.959912					109.233	56.812	1.36634	1.08047			11.771	89.409
			40.111	32.255	0.641686	0.795701			14.539	75.764	0.232591	1.86903			69.031	32.611	1.10434	0.804483				35.517	17.076	0.932139	0.845923			4.683	69.107	0.122905	3.42347			20.627	22.995	0.541353	1.13914					79.24	47.888	0.99117	0.910754			9.645	90.577
			36.325	35.535	0.581119	0.876615			25.084	90.971	0.401288	2.24417			85.007	29.813	1.35992	0.735459				30.142	14.881	0.791073	0.737186			8.112	57.246	0.212898	2.83589			8.707	17.942	0.228514	0.888824					84.107	44.835	1.05205	0.852691			22.85	121.293
			52.192	36.012	0.834955	0.888382			17.89	77.331	0.2862	1.90768			74.949	33.993	1.19902	0.838576				32.215	17.643	0.845479	0.874012			3.75	46.406	0.0984183	2.29889			6.908	16.13	0.1813	0.79906					107.18	51.152	1.34066	0.97283			21.411	157.34
			29.596	28.07	0.47347	0.692461			13.722	72.724	0.219521	1.79403			60.752	32.107	0.971896	0.79205				27.845	15.473	0.730789	0.766513			4.217	59.806	0.110675	2.96271			20.862	22.228	0.547521	1.10115					104.989	54.865	1.31325	1.04345			19.342	125.758
			35.894	28.71	0.574224	0.708249			14.666	59.639	0.234623	1.47124			104.149	34.855	1.66615	0.85984				24.238	14.215	0.636123	0.704193			3.401	45.746	0.0892588	2.2662			51.61	39.922	1.3545	1.97769					99.994	52.712	1.25077	1.0025			22.25	122.748
			25.312	28.136	0.404935	0.694089			17.353	60.383	0.277609	1.48959			82.514	35.557	1.32004	0.877158				35.944	17.274	0.943346	0.855732			4.633	55.009	0.121593	2.72508			41.938	36.624	1.10066	1.81431					79.865	45.79	0.998988	0.870853			20.639	139.585
			36.025	30.392	0.576319	0.749742			14.703	68.76	0.235215	1.69624			62.337	24.253	0.997253	0.598299				25.427	14.639	0.667329	0.725197			4.19	46.291	0.109966	2.2932			29.604	35.431	0.776953	1.75521					81.177	44.234	1.0154	0.841261			17.1	124.003
			38.134	31.82	0.610059	0.78497			24.445	90.865	0.391065	2.24155			71.254	29.562	1.1399	0.729267				44.274	20.463	1.16197	1.01371			2.66	29.393	0.0698114	1.45609			30.53	33.213	0.801256	1.64533					90.395	54.818	1.1307	1.04255			17.901	87.93
			39.073	30.481	0.625081	0.751938			20.098	62.866	0.321523	1.55085			72.247	34.237	1.15579	0.844595				35.214	16.323	0.924187	0.808621			2.395	30.642	0.0628565	1.51797			33.653	34.905	0.883219	1.72915					92.282	56.87	1.15431	1.08158			18.436	128.846
			47.595	31.272	0.761414	0.771451			15.168	65.445	0.242654	1.61447			66.108	30.355	1.05758	0.748829				23.587	14.817	0.619038	0.734015			5.057	65.249	0.13272	3.23235			30.345	33.257	0.796401	1.64751					89.589	49.124	1.12062	0.934261			17.874	119.855
			42.309	36.991	0.676849	0.912533			15.128	74.646	0.242014	1.84145			75.893	29.379	1.21412	0.724752				25.262	14.122	0.662998	0.699586			3.136	56.201	0.0823039	2.78413			31.918	32.424	0.837684	1.60624					97.409	52.405	1.21844	0.99666			23.88	118.786
			31.061	25.494	0.496907	0.628913			22.338	87.349	0.357358	2.15482			77.705	30.493	1.24311	0.752234				30.874	16.973	0.810284	0.840821			2.718	47.051	0.0713336	2.33085			29.548	33.432	0.775484	1.65618					70.016	52.991	0.875792	1.00781			21.225	122.905
			35.829	31.182	0.573184	0.769231			16.099	79.897	0.257548	1.97098			54.733	22.856	0.875606	0.563836				33.785	20.34	0.886683	1.00762			9.591	54.469	0.251715	2.69833			35.052	34.216	0.919936	1.69502					94.911	52.135	1.18719	0.991525			16.548	135.055
			35.213	32.059	0.563329	0.790866			14.566	88.58	0.233023	2.18519			61.002	26.312	0.975896	0.649092				21.985	14.819	0.576994	0.734114			4.065	37.924	0.106685	1.87871			33.155	33.125	0.870149	1.64097					93.366	54.703	1.16786	1.04036			30.417	141.394
			35.185	32.024	0.562881	0.790002			19.977	80.431	0.319587	1.98416			68.216	29.391	1.0913	0.725049				27.816	15.59	0.730028	0.772309			4.894	41.483	0.128442	2.05502			6.788	29.484	0.17815	1.4606					79.71	59.525	0.997049	1.13207			23.501	121.705
			35.839	34.399	0.573344	0.848591			26.49	101.555	0.423781	2.50527			67.733	30.103	1.08358	0.742613				31.861	15.565	0.836188	0.77107			4.489	32.279	0.117813	1.59906			5.506	26.699	0.144504	1.32263					89.551	49.186	1.12014	0.93544			16.809	116.424
			40.398	34.712	0.646278	0.856313			20.964	90.488	0.335377	2.23225			79.451	30.666	1.27104	0.756502				30.193	16.232	0.792412	0.804113			3.596	39.995	0.0943766	1.9813			36.269	34.419	0.951876	1.70507					81.724	67.216	1.02224	1.27834			16.197	127.944
			39.383	33.06	0.63004	0.815559			28.801	99.68	0.460752	2.45901			2.703	18.301	0.043242	0.451469				33.818	16.068	0.887549	0.795988			3.858	37.18	0.101253	1.84185			32.008	30.526	0.840046	1.51222					102.463	62.87	1.28165	1.19569			18.74	143.934
			38.098	33.125	0.609483	0.817163			15.777	96.099	0.252397	2.37067			38.418	22.19	0.614602	0.547407				31.403	15.035	0.824168	0.744815			3.636	45.586	0.0954264	2.25827			38.647	33.9	1.01429	1.67936					104.852	66.405	1.31154	1.26292			18.341	104.602
			30.347	27.513	0.485484	0.67872			15.748	101.814	0.251933	2.51166			73.728	30.186	1.17948	0.74466				34.476	16.087	0.904819	0.79693			1.612	25.447	0.0423067	1.26061			42.078	33.904	1.10433	1.67956					87.15	69.596	1.09011	1.32361			17.421	119.427
			36.566	31.182	0.584974	0.769231			14.914	66.544	0.238591	1.64158			69.754	27.805	1.11591	0.685923				31.996	15.787	0.839731	0.782068			5.151	38.188	0.135187	1.89178			31.029	31.237	0.814352	1.54744					107.981	65.901	1.35068	1.25333			17.042	159.479
			34.474	29.999	0.551507	0.740047			19.499	84.788	0.31194	2.09164			9.537	10.782	0.152571	0.265982				29.473	14.166	0.773515	0.701766			3.74	47.716	0.0981559	2.36379			31.228	30.22	0.819575	1.49706					93.954	63.304	1.17522	1.20394			22.411	145.346
			35.733	29.134	0.571648	0.718709			14.707	74.309	0.235279	1.83313			67.363	34.979	1.07766	0.862899				33.654	16.133	0.883245	0.799208			3.991	36.167	0.104743	1.79167			35.957	29.881	0.943687	1.48027					94.815	65.638	1.18599	1.24833			18.922	102.319
			40.091	31.531	0.641366	0.77784			15.081	80.265	0.241262	1.98006			66.274	30.752	1.06024	0.758623				26.858	14.972	0.704885	0.741694			4.393	34.609	0.115294	1.71449			39.772	32.595	1.04381	1.61471					87.414	65.744	1.09341	1.25035			23.337	115.502
			35.682	28.984	0.570832	0.715008			18.417	101.814	0.294631	2.51166			78.982	33.656	1.26354	0.830262				29.666	13.493	0.778581	0.668426			3.992	49.293	0.10477	2.44191			27.847	28.664	0.730841	1.41998					74.649	57.938	0.933744	1.10189			20.4	134.846
			33.207	29.913	0.531238	0.737926			14.637	68.195	0.234159	1.68231			69.738	30.37	1.11565	0.7492				10.125	8.982	0.265729	0.444957			3.677	34.395	0.0965024	1.70388			28.102	28.601	0.737534	1.41686					93.076	67.381	1.16424	1.28148			21.806	93.24
			33.712	31.078	0.539317	0.766665			13.623	82.988	0.217938	2.04724			85.247	35.67	1.36376	0.879946				35.346	17.985	0.927652	0.890954			3.964	65.983	0.104035	3.26871			29.944	30.394	0.785877	1.50568					107.735	62.312	1.3476	1.18508			20.092	83.937
			37.218	31.934	0.595405	0.787782			15.481	77.163	0.247661	1.90354			75.906	30.961	1.21433	0.763779				35.042	16.572	0.919673	0.820956			3.938	41.993	0.103352	2.08028			40.24	32.007	1.05609	1.58559					82.6	71.929	1.0332	1.36798			17.152	123.17
			47.044	35.758	0.752599	0.882116			24.58	97.985	0.393225	2.4172			82.646	31.978	1.32215	0.788867				37.859	18.526	0.993605	0.917754			5.965	42.148	0.156551	2.08796			22.043	25.639	0.578516	1.27012					81.626	57.487	1.02102	1.09331			14.686	79.389
			35.508	29.914	0.568049	0.73795			14.948	63.202	0.239135	1.55913			33.362	21.503	0.533717	0.530459				45.618	21.612	1.19724	1.07063			3.479	36.398	0.0913059	1.80311			31.744	28.123	0.833118	1.39318					83.748	54.936	1.04756	1.0448			18.479	76.749
			44.903	33.026	0.718348	0.814721			18.868	62.584	0.301846	1.54389			29.629	17.444	0.473998	0.430327				40.753	20.817	1.06956	1.03125			4.583	37.68	0.12028	1.86662			34.174	29.288	0.896893	1.45089					91.313	57.942	1.14218	1.10197			17.095	118.504
			44.498	33.844	0.711868	0.8349			18.57	62.092	0.297078	1.53175			89.547	33.854	1.43255	0.835147				47.059	22.245	1.23506	1.10199			3.787	36.933	0.0993894	1.82961			25.776	27.117	0.676488	1.34334					88.556	59.401	1.1077	1.12971			18.383	106.523
			38.346	32.006	0.61345	0.789558			23.538	92.184	0.376555	2.27409			70.184	31.007	1.12279	0.764914				44.658	20.102	1.17204	0.995828			3.921	29.733	0.102906	1.47294			19.539	23.234	0.512799	1.15098					112.202	66.577	1.40347	1.26619			17.543	87.588
			33.778	30.461	0.540372	0.751444			17.029	66.662	0.272426	1.64449			97.028	35.653	1.55223	0.879526				42.369	21.582	1.11197	1.06914			2.706	60.187	0.0710186	2.98159			18.058	23.896	0.47393	1.18378					96.864	60.172	1.21162	1.14438			20.483	91.9
			42.573	34.78	0.681073	0.85799			19.867	87.455	0.317828	2.15743			86.809	35.263	1.38875	0.869905				39.533	19.859	1.03754	0.98379			3.515	37.851	0.0922508	1.87509			11.392	17.378	0.298982	0.860884					95.116	55.747	1.18975	1.06022			19.837	87.483
			48.253	35.506	0.77194	0.8759			20.197	64.268	0.323107	1.58543			86.662	29.74	1.3864	0.733658				43.593	16.871	1.14409	0.835768			3.776	34.792	0.0991007	1.72355			24.746	27.847	0.649456	1.3795					82.064	56.43	1.02649	1.07321			13.245	99.693
			42.241	33.496	0.675762	0.826315			20.323	78.359	0.325123	1.93304			84.906	31.919	1.35831	0.787412				37.102	18.48	0.973738	0.915476			3.652	39.69	0.0958463	1.96619			22.014	24.455	0.577755	1.21147					64.344	54.959	0.804844	1.04523			19.657	88.043
			52.696	33.941	0.843018	0.837293			14.523	59.879	0.232336	1.47716			89.181	32.988	1.4267	0.813783				41.69	20.17	1.09415	0.999196			5.292	52.897	0.138888	2.62045			24.599	24.624	0.645598	1.21984					97.241	58.599	1.21633	1.11446			17.486	139.066
			40.483	33.472	0.647637	0.825723			15.275	63.017	0.244366	1.55457			89.779	38.823	1.43626	0.957727				36.714	18.842	0.963555	0.933409			3.523	53.332	0.0924607	2.642			22.591	25.244	0.592898	1.25056					93.308	57.452	1.16714	1.09265			21.23	103.735
			46.421	33.764	0.742632	0.832926			15.216	66.349	0.243422	1.63677			77.328	30.662	1.23708	0.756403				30.351	20.004	0.796558	0.990973			3.435	35.947	0.0901512	1.78077			24.931	26.847	0.654311	1.32997					84.402	52.011	1.05574	0.989167			20.402	92.216
			49.675	36.645	0.794689	0.903998			36.984	79.155	0.591661	1.95268			72.872	31.093	1.16579	0.767035				36.636	21.5	0.961507	1.06508			3.451	36.645	0.0905711	1.81535			18.344	23.089	0.481436	1.1438					91.72	69.267	1.14728	1.31735			18.177	94.452
			45.393	35.558	0.726186	0.877183			14.829	80.366	0.237231	1.98255			81.916	31.597	1.31047	0.779468				37.836	14.924	0.993001	0.739316			4.896	77.427	0.128495	3.83564			27.108	26.137	0.711446	1.29479					80.895	59.105	1.01187	1.12408			20.262	87.574
			42.069	32.452	0.67301	0.800561			17.415	88.901	0.278601	2.1931			31.061	21.105	0.496907	0.520641				17.538	14.706	0.460283	0.728517			3.808	53.418	0.0999405	2.64626			23.189	25.04	0.608593	1.24045					98.188	59.622	1.22818	1.13392			20.77	140.711
			46.876	36.514	0.749911	0.900766			27.548	80.893	0.440706	1.99555			69.239	29.137	1.10767	0.718783				35.637	19.018	0.935289	0.942128			4.733	44.73	0.124217	2.21587			25.232	25.533	0.662211	1.26487					95.825	60.439	1.19862	1.14945			20.731	127.171
			40.468	35.036	0.647397	0.864305			23.224	91.455	0.371532	2.25611			59.937	29.417	0.958858	0.72569				37.989	18.941	0.997017	0.938313			3.431	34.255	0.0900462	1.69695			23.677	23.895	0.6214	1.18373					96.242	61.381	1.20384	1.16737			21.503	131.599
			90.839	59.044	1.45322	1.45656			41.822	110.094	0.669058	2.71592			61.217	31.308	0.979335	0.772339				42.315	20.984	1.11055	1.03952			3.349	50.538	0.0878941	2.50359			31.079	27.011	0.815665	1.33809					91.15	62.14	1.14015	1.1818			17.449	121.267
			90.244	55.608	1.4437	1.3718			22.98	94.169	0.367629	2.32306			51.204	26.675	0.819149	0.658047				35.719	18.651	0.937441	0.923947			7.121	60.763	0.18689	3.01012			28.96	27.292	0.760052	1.35201					84.699	56.992	1.05945	1.0839			22.385	154.323
			80.357	53.932	1.28553	1.33045			29.305	113.494	0.468814	2.79979			58.762	27.028	0.940061	0.666756				33.637	17.92	0.882799	0.887734			4.198	50.503	0.110176	2.50185			25.966	27.155	0.681475	1.34522					82.606	52.116	1.03327	0.991164			20.892	140.496
			74.843	48.814	1.19732	1.2042			34.134	62.09	0.546068	1.5317			78.735	29.335	1.25958	0.723667				36.004	19.047	0.944921	0.943564			2.885	51.327	0.0757165	2.54267			23.351	24.847	0.612844	1.23089					82.107	61.905	1.02703	1.17734			19.947	148.244
			94.166	54.105	1.50645	1.33472			34.506	64.248	0.552019	1.58494			14.351	23.609	0.229584	0.582412				46.909	22.439	1.23112	1.1116			3.725	47.028	0.0977622	2.32971			24.07	22.842	0.631714	1.13156					68.868	45.649	0.861432	0.868172			24.358	126.81
			73.541	41.296	1.17649	1.01873			20.214	81.728	0.323379	2.01615			15.208	22.087	0.243294	0.544866				35.628	17.872	0.935053	0.885356			4.262	45.757	0.111856	2.26674			27.789	27.128	0.729319	1.34389					97.937	68.256	1.22504	1.29812			27.645	129.404
			82.761	56.292	1.32399	1.38867			24.434	45.462	0.390889	1.12151			68.966	28.155	1.1033	0.694558				31.068	18.25	0.815376	0.904082			3.689	61.333	0.0968174	3.03836			26.602	30.743	0.698166	1.52297					91.174	56.749	1.14045	1.07928			9.888	110.184
			89.752	47.961	1.43583	1.18315			47.935	103.025	0.766853	2.54153			62.472	27.314	0.999412	0.673811				37.843	18.706	0.993185	0.926671			3.64	39.524	0.0955314	1.95797			22.512	23.629	0.590825	1.17055					80.121	53.43	1.00219	1.01615			27.11	130.545
			66.608	43.815	1.06558	1.08088			8.15	23.236	0.130382	0.57321			61.891	28.246	0.990118	0.696802				33.567	20.076	0.880962	0.99454			3.252	63.001	0.0853484	3.12099			25.381	25.821	0.666121	1.27914					88.04	69.614	1.10124	1.32395			28.038	127.288
			88.954	47.955	1.42307	1.18301			24.237	84.174	0.387738	2.07649			42.905	27.206	0.686384	0.671147				30.993	16.813	0.813408	0.832895			4.469	40.178	0.117288	1.99037			24.774	26.564	0.650191	1.31595					79.146	58.101	0.989994	1.10499			9.781	108.356
			75.966	48.847	1.21529	1.20501			40.741	56.57	0.651765	1.39553			44.727	27.432	0.715532	0.676722				35.382	17.663	0.928596	0.875003			3.639	42.136	0.0955051	2.08736			24.928	25.864	0.654232	1.28127					76.283	60.252	0.954183	1.1459			27.692	115.993
			50.264	44.2	0.804112	1.09037			3.199	31.087	0.0511768	0.766887			37.496	26.149	0.599852	0.645071				15.144	13.731	0.397452	0.680216			3.746	47.001	0.0983133	2.32837			24.315	27.606	0.638144	1.36757					84.793	70.259	1.06063	1.33622			20.023	126.943
			84.772	48.087	1.35616	1.18626			13.614	53.521	0.217794	1.32031			42.259	28.4	0.676049	0.700601				40.032	19.313	1.05064	0.956741			1.259	26.773	0.0330423	1.3263			20.34	24.756	0.533821	1.22638					83.868	58.6	1.04906	1.11448			22.003	147.387
			85.527	54.331	1.36824	1.34029			26.29	39.299	0.420581	0.96947			62.499	28.851	0.999844	0.711727				38.519	21.525	1.01093	1.06632			3.292	36.676	0.0863981	1.81688			26.096	27.913	0.684886	1.38277					90.898	58.023	1.13699	1.10351			20.322	158.105
			82.805	45.787	1.32469	1.12952			25.397	44.787	0.406295	1.10485			23.337	18.616	0.37334	0.459239				34.938	17.988	0.916944	0.891103			3.696	49.253	0.0970011	2.43993			29.941	29.785	0.785798	1.47551					105.183	60.589	1.31568	1.15231			25.173	138.995
			87.389	52.375	1.39803	1.29204			20.969	53.387	0.335457	1.31701			62.474	32.358	0.999444	0.798242				40.404	20.464	1.0604	1.01376			3.335	29.929	0.0875267	1.48264			24.485	26.64	0.642606	1.31971					78.755	58.476	0.985103	1.11212			21.681	114.099
			83.517	48.052	1.33609	1.1854			23.985	86.601	0.383706	2.13637			57.859	30.564	0.925615	0.753985				36.938	21.197	0.969433	1.05007			4.164	49.276	0.109284	2.44107			24.74	27.625	0.649298	1.36851					32.36	37.797	0.404774	0.718839			30.087	144.47
			80.753	47.096	1.29187	1.16181			72.364	38.295	1.15766	0.944702			49.25	25.571	0.78789	0.630813				45.031	22.776	1.18183	1.12829			3.178	34.183	0.0834062	1.69338			21.65	24.045	0.568202	1.19116					99.444	57.528	1.24389	1.09409			21.083	144.05
			90.893	54.63	1.45408	1.34767			13.59	52.606	0.21741	1.29774			46.886	25.155	0.750071	0.62055				49.404	24.039	1.2966	1.19086			4.403	61.919	0.115556	3.06739			12.185	17.754	0.319794	0.879511					56.466	45.687	0.706303	0.868895			19.244	104.708
			72.787	43.591	1.16443	1.07535			48.651	39.548	0.778307	0.975612			47.555	24.784	0.760774	0.611398				41.026	21.305	1.07672	1.05542			5.154	34.974	0.135266	1.73257			12.368	20.417	0.324597	1.01143					91.007	66.435	1.13836	1.26349			20.73	152.187
			87.446	54.074	1.39894	1.33396			19.028	63.298	0.304405	1.5615			60.885	27.571	0.974024	0.680151				43.179	19.09	1.13323	0.945694			4.867	56.059	0.127734	2.77709			23.969	26.168	0.629064	1.29633					111.002	56.242	1.38846	1.06963			21.381	189.375
			83.839	53.673	1.34124	1.32406			20.031	75.828	0.320451	1.87061			51.059	24.86	0.81683	0.613273				34.045	18.155	0.893507	0.899376			4.995	40.384	0.131093	2.00057			25.816	29.256	0.677538	1.44931					69.463	52.448	0.868875	0.997478			21.256	142.646
			86.846	50.432	1.38934	1.24411			16.362	84.412	0.261755	2.08237			56.779	28.26	0.908337	0.697148				49.98	23.811	1.31172	1.17957			5.856	53.56	0.15369	2.65329			34.907	29.538	0.91613	1.46327					100.892	63.936	1.262	1.21596			21.335	112.166
			72.471	49.984	1.15937	1.23306			17.493	73.889	0.279849	1.82277			52.21	25.796	0.835243	0.636363				46.894	21.348	1.23073	1.05755			4.899	61.381	0.128574	3.04074			26.658	25.703	0.699636	1.27329					79.393	54.213	0.993084	1.03105			21.59	115.05
			98.389	49.281	1.574	1.21572			16.84	75.045	0.269402	1.85129			45.77	24.107	0.732218	0.594697				39.803	19.438	1.04462	0.962934			4.178	56.959	0.109651	2.82168			20.019	23.069	0.525396	1.14281					79.532	55.943	0.994823	1.06395			22.548	128.304
			89.506	45.462	1.4319	1.12151			22.363	38.702	0.357758	0.954742			51.837	23.941	0.829276	0.590602				52.907	23.444	1.38854	1.16139			4.813	56.533	0.126317	2.80057			17.302	24.003	0.454089	1.18908					91.598	62.252	1.14575	1.18393			21.33	162.409
			77.037	47.235	1.23242	1.16524			19.779	91.231	0.31642	2.25058			55.589	24.695	0.8893	0.609203				39.523	21.202	1.03728	1.05032			3.602	41.784	0.0945341	2.06993			11.71	16.999	0.307328	0.842109					79.927	59.024	0.999763	1.12254			17.089	139.667
			85.943	46.133	1.3749	1.13806			10.788	52.615	0.172584	1.29796			46.424	23.83	0.74268	0.587864				43.484	19.758	1.14123	0.978786			4.008	66.812	0.105189	3.30978			25.796	26.686	0.677013	1.32199					80.767	49.235	1.01027	0.936372			19.796	97.418
			82.762	53.104	1.32401	1.31003			18.983	85.031	0.303686	2.09764			40.902	23.324	0.654341	0.575381				48.532	22.416	1.27372	1.11046			3.921	49.412	0.102906	2.44781			23.387	24.799	0.613789	1.22851					89.238	56.408	1.11623	1.07279			20.975	134.312
			95.991	46.23	1.53564	1.14045			16.247	68.406	0.259916	1.68751			47.326	24.255	0.75711	0.598348				44.659	21.991	1.17207	1.08941			3.657	49.749	0.0959775	2.4645			25.574	24.434	0.671187	1.21043					89.419	62.268	1.11849	1.18424			19.55	106.434
			92.635	48.073	1.48195	1.18592			16.34	68.365	0.261403	1.6865			38.985	22.423	0.623673	0.553154				46.258	21.866	1.21404	1.08321			4.774	51.599	0.125293	2.55615			23.873	25.678	0.626544	1.27206					85.975	57.128	1.07541	1.08648			17.965	117.606
			99.807	48.41	1.59669	1.19423			16.55	66.838	0.264763	1.64883			13.791	17.104	0.220625	0.42194				48.02	22.133	1.26028	1.09644			5.395	46.243	0.141591	2.29082			25.88	28.016	0.679218	1.38788					78.38	55.152	0.980413	1.0489			18.156	153.881
			99.467	43.641	1.59125	1.07658			17.939	58.567	0.286984	1.44479			45.461	24.004	0.727274	0.592156				47.762	23.451	1.25351	1.16173			3.652	49.888	0.0958463	2.47139			18.823	23.187	0.494007	1.14865					78.075	55.15	0.976598	1.04887			22.997	153.234
			83.947	46.416	1.34296	1.14504			19.024	71.833	0.304341	1.77205			44.649	25.024	0.714284	0.617319				50.806	23.565	1.3334	1.16738			4.794	67.625	0.125818	3.35006			28.684	25.602	0.752808	1.26829					106.005	61.402	1.32596	1.16777			20.462	115.987
			88.757	45.257	1.41991	1.11645			20.685	95.947	0.330914	2.36692			42.284	23.59	0.676449	0.581943				44.951	22.278	1.17973	1.10362			4.613	47.464	0.121068	2.35131			24.244	24.57	0.636281	1.21717					100.573	60.017	1.25801	1.14143			16.567	116.973
			88.11	51.292	1.40956	1.26533			18.648	77.801	0.298326	1.91928			46.101	24.709	0.737513	0.609548				43.521	22.687	1.1422	1.12389			3.338	46.168	0.0876054	2.2871			26.138	25.562	0.685989	1.26631					64.535	50.166	0.807233	0.954078			21.029	128.892
			93.81	45.681	1.50075	1.12691			22.737	65.706	0.363741	1.62091			45.332	24.905	0.725211	0.614383				44.989	21.663	1.18073	1.07316			3.676	53.015	0.0964762	2.6263			25.116	23.711	0.659166	1.17461					101.718	44.267	1.27234	0.841888			22.767	157.482
			86.05	47.181	1.37661	1.16391			20.677	89.906	0.330786	2.2179			45.211	26.147	0.723275	0.645022				43.668	23.792	1.14606	1.17863			4.136	43.138	0.108549	2.137			31.578	27.465	0.828761	1.36058					79.477	54.929	0.994135	1.04466			19.472	132.879
			89.009	49.814	1.42394	1.22886			20.169	80.609	0.322659	1.98855			39.472	23.545	0.631464	0.580833				51.484	26.169	1.35119	1.29638			4.771	65.257	0.125214	3.23275			31.588	29.635	0.829023	1.46808					105.855	64.594	1.32408	1.22848			21.462	131.29
			85.537	51.871	1.3684	1.27961			21.049	61.072	0.336737	1.50659			40.019	22.304	0.640214	0.550219				47.241	24.98	1.23983	1.23748			4.125	48.435	0.10826	2.39941			27.201	26.276	0.713887	1.30168					82.316	51.749	1.02965	0.984184			18.65	155.688
			7.037	26.853	0.112576	0.662438			22.087	87.075	0.353343	2.14806			12.067	15.903	0.193045	0.392312				31.737	20.839	0.832934	1.03234			4.996	44.978	0.131119	2.22815			24.402	24.282	0.640428	1.2029					98.916	50.241	1.23729	0.955504			20.319	164.203
			93.07	56.701	1.48891	1.39876			20.195	89.465	0.323075	2.20702			73.647	28.14	1.17819	0.694188				44.695	23.886	1.17301	1.18328			3.89	41.414	0.102093	2.0516			26.248	22.884	0.688876	1.13364					32.156	40.139	0.402222	0.76338			19.18	139.159
			75.355	47.993	1.20551	1.18394			14.897	59.884	0.238319	1.47728			73.032	31.837	1.16835	0.785389				45.358	24.131	1.19042	1.19542			3.548	52.073	0.0931168	2.57963			27.046	27.424	0.709819	1.35855					86.844	54.633	1.08628	1.03903			21.775	137.444
			56.345	51.984	0.901394	1.2824			19.213	71.04	0.307365	1.75249			95.238	33.915	1.52359	0.836651				40.209	21.592	1.05528	1.06964			4.474	41.309	0.11742	2.0464			24.389	24.721	0.640086	1.22465					78.513	47.586	0.982076	0.90501			19.787	114.461
			54.925	52.886	0.878677	1.30465			15.402	68.436	0.246398	1.68825			76.081	30.494	1.21713	0.752258				44.353	22.602	1.16404	1.11967			5.962	49.174	0.156472	2.43602			27.078	26.237	0.710659	1.29975					72.817	53.087	0.910828	1.00963			20.141	117.029
			85.369	52.514	1.36571	1.29547			22.335	59.571	0.35731	1.46956			70.698	29.78	1.13101	0.734645				43.158	23.443	1.13268	1.16134			3.539	59.084	0.0928806	2.92695			26.137	25.2	0.685962	1.24838					110.069	59.482	1.37679	1.13125			20.63	151.434
			63.138	56.395	1.01007	1.39121			22.889	48.117	0.366173	1.187			102.689	33.158	1.64279	0.817977				45.594	22.994	1.19661	1.13909			4.24	37.732	0.111278	1.8692			22.046	24.697	0.578595	1.22346					83.922	50.54	1.04973	0.961191			19.573	125.49
			85.5	52.587	1.36781	1.29727			0.452	26.557	0.00723099	0.655136			54.155	26.692	0.866359	0.658467				44.84	24.874	1.17682	1.23223			3.762	56.657	0.0987332	2.80672			28.664	28.476	0.752283	1.41066					69.111	47.121	0.864472	0.896167			17.171	103.475
			48.098	48.084	0.76946	1.18619			32.846	80.796	0.525463	1.99316			88.763	31.779	1.42001	0.783958				42.92	22.666	1.12643	1.12284			3.228	45.579	0.0847185	2.25793			25.424	28.513	0.66725	1.4125					74.187	59.297	0.927965	1.12774			18.926	88.862
			89.352	54.051	1.42943	1.33339			21.079	94.011	0.337217	2.31916			71.083	28.554	1.13717	0.7044				46.68	22.882	1.22511	1.13355			4.493	33.643	0.117918	1.66663			26.135	26.957	0.68591	1.33542					82.992	50.363	1.0381	0.957825			16.183	113.41
			98.028	58.468	1.56823	1.44235			3.698	13.635	0.0591597	0.336363			82.057	30.198	1.31273	0.744956				44.105	24.558	1.15753	1.21657			3.649	39.317	0.0957676	1.94771			23.669	24.128	0.62119	1.19527					91.915	49.944	1.14971	0.949856			24.176	149.235
			93.19	57.696	1.49083	1.42331			71.716	76.793	1.1473	1.89441			80.972	28.755	1.29537	0.709359				45.008	25.943	1.18123	1.28518			4.217	44.857	0.110675	2.22216			12.189	17.898	0.319899	0.886644					81.074	57.035	1.01411	1.08472			22.055	115.733
			96.047	55.653	1.53654	1.37291			32.351	59.212	0.517544	1.4607			38.23	17.327	0.611594	0.427441				45.856	23.069	1.20349	1.14281			3.522	45.157	0.0924345	2.23702			12.367	19.953	0.32457	0.988446					90.511	66.441	1.13215	1.2636			20.306	109.897
			71.502	51.671	1.14387	1.27468			18.828	65.721	0.301206	1.62128			42.252	20.674	0.675937	0.510008				41.743	21.89	1.09554	1.0844			4.215	49.436	0.110622	2.449			29.433	29.912	0.772466	1.4818					98.122	58.249	1.22735	1.1078			20.963	145.232
			79.971	55.985	1.27936	1.3811			19.01	53.077	0.304117	1.30936			69.763	27.844	1.11605	0.686885				46.602	24.582	1.22306	1.21776			3.802	50.507	0.099783	2.50205			23.917	26.158	0.627699	1.29583					94.401	54.261	1.18081	1.03196			18.302	109.135
			81.699	53.271	1.307	1.31415			28.059	49.732	0.448881	1.22684			79.525	30.604	1.27222	0.754972				41.147	23.583	1.0799	1.16827			6.274	56.629	0.16466	2.80533			25.835	26.343	0.678037	1.305					86.239	52.236	1.07872	0.993446			19.888	115.597
			73.344	50.888	1.17334	1.25536			17.58	41.923	0.281241	1.0342			67.667	28.087	1.08252	0.69288				42.191	21.784	1.1073	1.07915			4.4	43.372	0.115477	2.14859			27.042	27.933	0.709714	1.38377					94.144	62.288	1.1776	1.18462			14.845	97.36
			92.465	56.355	1.47923	1.39023			16.047	42.234	0.256716	1.04187			60.543	26.877	0.968553	0.66303				35.785	21.718	0.939173	1.07588			5.898	55.579	0.154792	2.75331			23.042	24.343	0.604735	1.20592					102.76	72.049	1.28537	1.37026			20.794	151.858
			88.465	51.148	1.41524	1.26177			14.189	42.576	0.226992	1.05031			73.575	30.654	1.17704	0.756206				46.587	24.495	1.22267	1.21345			5.713	50.486	0.149937	2.50101			5.23	10.077	0.137261	0.499202					51.027	45.948	0.638269	0.873858			20.86	106.456
			81.667	53.405	1.30649	1.31745			25.45	61.912	0.407143	1.52731			52.434	26.382	0.838827	0.650819				45.404	24.648	1.19162	1.22103			3.408	38.492	0.0894426	1.90684			24.348	26.177	0.63901	1.29678					100.235	58.032	1.25379	1.10368			17.134	131.315
			88.45	54.332	1.415	1.34032			26.111	66.75	0.417718	1.64666			42.313	24.865	0.676913	0.613396				41.46	22.908	1.08811	1.13483			5.247	52.408	0.137707	2.59623			27.887	26.483	0.731891	1.31193					83.174	51.074	1.04038	0.971347			19.979	122.244
			92.867	57.631	1.48566	1.4217			24.118	60.248	0.385834	1.48626			65.842	33.316	1.05332	0.821875				49.094	22.632	1.28847	1.12116			4.141	52.293	0.10868	2.59053			42.313	35.73	1.1105	1.77002					92.183	50.885	1.15307	0.967752			15.934	120.488
			89.853	59.798	1.43745	1.47516			27.535	57.121	0.440498	1.40912			53.247	25.911	0.851833	0.6392				47.181	21.142	1.23826	1.04735			1.825	58.362	0.0478969	2.89118			35.6	30.904	0.934318	1.53094					67.136	52.187	0.839768	0.992514			11.514	100.49
			97.995	59.723	1.5677	1.47331			19.154	76.966	0.306421	1.89868			76.392	30.112	1.2221	0.742835				47.442	22.946	1.24511	1.13672			1.495	42.338	0.0392361	2.09737			39.484	34.249	1.03625	1.69665					89.912	54.86	1.12466	1.04335			22.188	138.629
			66.117	46.12	1.05772	1.13774			22.492	49.194	0.359822	1.21357			73.283	26.75	1.17236	0.659898				39.613	21.421	1.03964	1.06117			3.477	36.723	0.0912535	1.81921			34.013	33.416	0.892667	1.65539					65.802	52.71	0.823081	1.00246			19.373	140.927
			45.357	36.302	0.725611	0.895536			29.148	45.56	0.466303	1.12392			87.088	31.776	1.39321	0.783884				43.305	22.852	1.13653	1.13206			1.322	42.164	0.0346957	2.08875			40.472	33.883	1.06218	1.67852					76.894	51.45	0.961825	0.978498			17.923	133.901
			44.783	32.335	0.716428	0.797674			21.664	42.798	0.346576	1.05579			63.255	25.698	1.01194	0.633946				40.1	22.049	1.05242	1.09228			3.997	52.981	0.104901	2.62461			45.764	33.017	1.20107	1.63562					75.668	57.931	0.94649	1.10176			12.251	116.441
			31.395	28.982	0.50225	0.714959			17.826	71.322	0.285176	1.75945			70.874	28.425	1.13383	0.701218				38.835	19.607	1.01922	0.971306			3.567	55.556	0.0936155	2.75217			32.21	31.997	0.845348	1.58509					69.187	51.55	0.865423	0.980399			17.167	151.208
			69.104	41.842	1.10551	1.0322			27.99	45.719	0.447777	1.12785			63.276	26.034	1.01227	0.642234				37.62	20.1	0.987332	0.995728			4.006	56.565	0.105137	2.80216			34.402	31.101	0.902876	1.5407					92.946	58.227	1.16261	1.10739			15.472	133.194
			72.538	39.527	1.16045	0.975094			23.182	68.335	0.37086	1.68576			74.489	29.585	1.19166	0.729834				51.048	22.237	1.33975	1.10159			4.859	45.964	0.127524	2.277			38.671	35.018	1.01492	1.73475					92.449	50.718	1.15639	0.964576			18.289	104.439
			67.443	40.732	1.07894	1.00482			18.724	37.785	0.299542	0.932121			65.883	25.453	1.05398	0.627902				41.146	20.874	1.07987	1.03407			5.386	63.106	0.141355	3.12619			38.215	36.971	1.00295	1.8315					83.899	56.41	1.04945	1.07283			26.355	116.555
			63.859	39.036	1.0216	0.962982			20.967	60.001	0.335425	1.48017			73.276	27.833	1.17225	0.686614				37.438	19.924	0.982556	0.98701			3.797	54.198	0.0996518	2.6849			46.841	37.407	1.22934	1.8531					82.334	49.896	1.02987	0.948943			20.765	121.496
			23.484	26.961	0.375691	0.665103			13.968	45.33	0.223457	1.11825			88.496	27.789	1.41574	0.685529				35.631	19.518	0.935131	0.966897			5.184	38.657	0.136053	1.91502			40.261	35.262	1.05665	1.74683					88.623	57.146	1.10854	1.08683			15.917	118.366
			64.993	37.564	1.03974	0.926669			14.916	33.009	0.238623	0.814301			84.426	26.817	1.35063	0.66155				31.508	19.647	0.826924	0.973287			2.709	44.466	0.0710974	2.20279			30.244	30.448	0.79375	1.50836					52.658	44.41	0.65867	0.844608			19.416	127.929
			46.232	34.037	0.739609	0.839661			20.702	30.529	0.331186	0.753122			70.868	24.336	1.13373	0.600346				48.061	22.406	1.26136	1.10996			5.446	60.31	0.14293	2.98768			29.902	33.247	0.784774	1.64701					106.052	57.768	1.32655	1.09866			17.897	115.234
			77.395	47.919	1.23815	1.18212			9.458	35.682	0.151307	0.880242			26.125	16.493	0.417942	0.406867				45.384	21.865	1.1911	1.08316			4.952	67.424	0.129965	3.3401			14.447	19.561	0.37916	0.969027					80.149	50.009	1.00254	0.951092			16.539	106.56
			71.703	37.657	1.14709	0.928963			23.861	68.79	0.381723	1.69699			82.997	25.879	1.32777	0.638411				52.258	22.145	1.3715	1.09704			2.371	31.079	0.0622266	1.53961			14.924	19.748	0.391679	0.978291					80.521	48.355	1.00719	0.919636			18.214	139.786
			59.831	33.187	0.957162	0.818692			16.773	58.174	0.26833	1.4351			23.203	14.961	0.371196	0.369074				42.23	19.828	1.10832	0.982254			4.356	59.778	0.114323	2.96133			31.03	33.239	0.814379	1.64662					71.911	52.878	0.899496	1.00566			19.114	133.95
			61.637	35.333	0.986054	0.871632			22.784	78.013	0.364493	1.92451			73.483	26.874	1.17556	0.662956				14.946	10.733	0.392256	0.531699			4.254	48.443	0.111646	2.3998			34.592	24.946	0.907863	1.23579					104.27	66.794	1.30426	1.27032			18.068	129.575
			76.846	39.955	1.22936	0.985653			27.014	50.063	0.432164	1.23501			82	27.294	1.31182	0.673317				37.039	20.158	0.972084	0.998602			13.259	69.029	0.347981	3.41961			33.39	30.131	0.876317	1.49265					98.265	53.206	1.22914	1.01189			17.294	112.505
			57.986	31.384	0.927646	0.774214			16.291	57.281	0.26062	1.41307			71.322	27.015	1.14099	0.666435				44.697	21.614	1.17307	1.07073			7.925	54.478	0.207991	2.69877			26.778	31.729	0.702785	1.57181					89.752	51.009	1.12266	0.970111			15.225	148.768
			20.548	25.398	0.328722	0.626545			19.884	41.026	0.3181	1.01207			83.865	25.303	1.34165	0.624201				34.772	19.67	0.912587	0.974427			7.798	71.726	0.204658	3.55321			29.839	34.091	0.783121	1.68882					86.679	57.773	1.08422	1.09875			19.879	125.61
			48.417	37.425	0.774564	0.92324			23.361	67.192	0.373724	1.65756			65.396	29.285	1.04619	0.722434				43.741	21.521	1.14798	1.06612			5.265	51.965	0.138179	2.57428			28.927	28.968	0.759186	1.43504					78.856	57.361	0.986367	1.09092			15.721	132.572
			61.228	34.287	0.979511	0.845828			27.006	82.035	0.432036	2.02373			80.712	28.978	1.29121	0.71486				42.549	21.933	1.11669	1.08653			6.857	47.303	0.179961	2.34333			33.649	31.113	0.883114	1.5413					95.358	58.355	1.19278	1.10982			18.513	128.899
			68.553	41.201	1.09669	1.01639			27.767	75.431	0.44421	1.86081			82.796	31.009	1.32455	0.764963				28.557	17.518	0.749475	0.867819			4.493	55.584	0.117918	2.75356			30.714	25.366	0.806085	1.2566					89.541	51.79	1.12002	0.984964			20.831	168.279
			60.827	34.448	0.973096	0.8498			17.519	66.037	0.280265	1.62907			76.37	26.792	1.22175	0.660934				37.582	20.339	0.986335	1.00757			5.091	60.74	0.133613	3.00898			34.06	33.563	0.893901	1.66267					80.011	45.477	1.00081	0.864901			18.086	121.605
			72.183	35.923	1.15477	0.886187			27.851	91.338	0.445554	2.25322			81.465	32.872	1.30326	0.810922				38.492	20.397	1.01022	1.01044			5.319	52.888	0.139597	2.62			30.914	34.113	0.811334	1.68991					90.161	54.159	1.12777	1.03002			20.443	111.444
			59.34	43.195	0.949307	1.06558			27.605	68.541	0.441618	1.69084			73.218	30.954	1.17132	0.763606				40.013	21.224	1.05014	1.05141			3.679	48.799	0.0965549	2.41744			34.4	35.051	0.902824	1.73638					85.02	57.462	1.06347	1.09284			16.62	145.401
			70.98	40.152	1.13552	0.990512			18.962	44.453	0.30335	1.09661			69.646	30.026	1.11418	0.740713				41.687	19.804	1.09407	0.981065			3.22	47.372	0.0845085	2.34675			32.247	34.359	0.846319	1.7021					111.062	56.783	1.38921	1.07992			18.683	134.821
			76.156	43.114	1.21833	1.06358			20.334	46.741	0.325299	1.15306			94.807	30.904	1.5167	0.762373				43.803	20.997	1.1496	1.04016			5.012	55.447	0.131539	2.74677			33.895	31.961	0.88957	1.58331					87.457	60.05	1.09395	1.14206			19.227	93.617
			83.149	37.896	1.3302	0.934859			17.769	74.161	0.284264	1.82948			51.51	27.751	0.824045	0.684591				39.769	20.338	1.04373	1.00752			3.077	44.689	0.0807555	2.21384			36.578	32.763	0.959985	1.62304					91.294	57.16	1.14195	1.08709			19.031	162.886
			24.95	24.131	0.399144	0.595289			24.098	52.037	0.385514	1.2837			80.168	30.161	1.28251	0.744044				32.143	19.465	0.843589	0.964271			4.599	52.323	0.1207	2.59201			38.774	34.291	1.01762	1.69873					80.778	54.559	1.01041	1.03763			19.58	137.183
			62.944	31.846	1.00696	0.785611			18.365	42.354	0.293799	1.04483			67.984	37.317	1.08759	0.920576				42.92	20.908	1.12643	1.03576			4.153	64.692	0.108995	3.20476			45.313	36.546	1.18923	1.81044					83.469	48.706	1.04407	0.926311			19.116	110.481
			55.607	34.266	0.889588	0.84531			28.289	77.62	0.452561	1.91481			74.188	31.064	1.18684	0.76632				40.079	20.045	1.05187	0.993004			4.584	50.05	0.120307	2.47941			3.464	13.508	0.0909123	0.669169					100.785	53.652	1.26066	1.02038			18.496	127.392
			64.141	34.797	1.02611	0.858409			7.549	8.364	0.120767	0.206332			55.458	30.049	0.887204	0.741281				41.702	20.745	1.09446	1.02768			4.059	48.763	0.106528	2.41566			41.425	37.049	1.08719	1.83536					105.788	56.042	1.32324	1.06583			16.576	137.155
			70.641	36.432	1.1301	0.898743			17.316	65.483	0.277017	1.6154			88.187	30.476	1.41079	0.751814				37.875	20.336	0.994025	1.00742			5.613	58.228	0.147313	2.88454			33.275	35.207	0.873298	1.74411					66.599	55.239	0.833051	1.05056			21.696	167.521
			49.592	33.572	0.793361	0.82819			22.471	45.089	0.359486	1.1123			72.221	27.039	1.15537	0.667027				43.058	22.636	1.13005	1.12136			5.926	48.301	0.155527	2.39277			32.891	32.055	0.86322	1.58796					87.837	56.465	1.09871	1.07388			20.47	148.101
			53.228	32.035	0.851529	0.790274			17.798	44.258	0.284728	1.0918			71.489	26.315	1.14366	0.649166				41.275	20.71	1.08326	1.02595			4.334	53.443	0.113745	2.6475			40.284	34.086	1.05725	1.68858					93.264	50.27	1.16659	0.956056			25.021	136.847
			80.086	40.509	1.2812	0.999319			18.337	53.996	0.293351	1.33203			53.38	26.272	0.853961	0.648106				44.028	23.501	1.15551	1.16421			4.495	44.257	0.117971	2.19244			33.536	34.644	0.880148	1.71622					72.269	55.532	0.903974	1.05613			23.396	143.55
			60.662	36.816	0.970456	0.908216			26.889	96.054	0.430164	2.36956			80.041	32.194	1.28048	0.794196				45.859	22.959	1.20356	1.13736			5.624	70.612	0.147601	3.49803			33.035	32.049	0.867	1.58767					78.259	52.04	0.978899	0.989719			30.407	163.779
			69.177	38.473	1.10668	0.949093			24.83	65.995	0.397224	1.62803			68.981	26.198	1.10354	0.64628				44.818	23.242	1.17624	1.15138			4.25	60.289	0.111541	2.98664			29.468	31.561	0.773384	1.56349					90.017	47.141	1.12597	0.896547			23.908	146.725
			66.344	35.411	1.06136	0.873556			26.609	70.559	0.425684	1.74062			72.123	27.101	1.15381	0.668556				41.922	24.069	1.10024	1.19235			6.109	43.81	0.16033	2.17029			29.046	32.581	0.762309	1.61402					82.309	55.442	1.02956	1.05442			22.799	138.184
			65.71	35.144	1.05121	0.86697			19.178	52.329	0.306805	1.29091			73.051	27.893	1.16865	0.688094				36.298	22.911	0.952637	1.13498			3.788	42.271	0.0994156	2.09405			28.667	31.089	0.752362	1.54011					78.965	51.875	0.98773	0.98658			22.712	164.959
			30.934	36.643	0.494875	0.903949			18.703	51.162	0.299206	1.26212			49.784	25.614	0.796433	0.631873				15.05	13.247	0.394985	0.65624			3.993	38.159	0.104796	1.89035			31.535	33.913	0.827632	1.68001					114.329	66.735	1.43008	1.26919			21.464	129.564
			71.363	36.44	1.14165	0.898941			20.854	77.783	0.333617	1.91883			75.285	27.288	1.20439	0.673169				39.672	23.413	1.04119	1.15985			4.597	57.668	0.120648	2.8568			26.502	33.014	0.695542	1.63547					85.648	49.098	1.07132	0.933766			21.684	122.748
			60.407	38.243	0.966377	0.943419			23.936	85.561	0.382922	2.11071			70.339	25.94	1.12527	0.639916				42.965	24.066	1.12761	1.1922			6.396	63.024	0.167862	3.12213			34.454	32.737	0.904241	1.62175					89.185	67.537	1.11557	1.28445			24.295	164.815
			71.729	37.587	1.1475	0.927236			10.598	41.151	0.169544	1.01516			92.065	28.151	1.47283	0.694459				38.798	22.644	1.01825	1.12175			7.132	55.21	0.187178	2.73503			37.331	30.68	0.979748	1.51985					108.824	65.15	1.36122	1.23905			23.734	135.172
			66.533	34.776	1.06438	0.857891			42.305	70.556	0.676785	1.74055			73.995	26.806	1.18375	0.661279				36.644	21.235	0.961717	1.05195			4.369	60.785	0.114664	3.01121			27.781	32.376	0.729109	1.60387					95.029	60.433	1.18867	1.14934			21.109	132.775
			80.023	41.454	1.28019	1.02263			25.198	68.127	0.403112	1.68063			62.049	27.76	0.992645	0.684813				40.276	23.228	1.05704	1.15069			5.305	51.737	0.139229	2.56299			27.917	30.486	0.732678	1.51024					98.308	64.708	1.22968	1.23064			25.658	184.228
			60.828	37.37	0.973112	0.921883			20.145	56.507	0.322275	1.39397			73.996	25.718	1.18377	0.634439				40.605	21.992	1.06567	1.08946			5.258	57.594	0.137996	2.85313			39.854	32.842	1.04596	1.62695					81.266	47.994	1.01651	0.91277			20.539	111.611
			67.236	34.981	1.07563	0.862949			24.711	66.235	0.395321	1.63396			51.994	24.905	0.831788	0.614383				44.307	24.297	1.16283	1.20364			4.867	57.371	0.127734	2.84209			32.556	29.92	0.854428	1.4822					94.234	59.094	1.17872	1.12387			26.906	169.247
			76.751	39.681	1.22784	0.978893			26.579	66.416	0.425205	1.63842			54.633	24.092	0.874006	0.594327				36.475	21.759	0.957282	1.07791			3.979	48.037	0.104428	2.37969			25.655	30.124	0.673312	1.4923					98.784	57.979	1.23564	1.10267			29.293	157.666
			92.298	45.42	1.47656	1.12047			26.581	66.783	0.425237	1.64747			78.791	30.736	1.26048	0.758228				41.945	21.729	1.10084	1.07643			5.883	53.733	0.154399	2.66186			36.78	32.993	0.965287	1.63443					72.779	56.993	0.910353	1.08392			31.243	141.625
			44.263	33.306	0.708109	0.821628			24.251	68.203	0.387962	1.6825			65.622	25.775	1.04981	0.635845				41.358	23.958	1.08544	1.18685			4.199	45.232	0.110202	2.24074			29.789	29.916	0.781809	1.482					97.682	65.574	1.22185	1.24711			20	146.428
			57.611	40.717	0.921647	1.00445			27.197	79.294	0.435091	1.95611			88.009	27.436	1.40795	0.67682				35.708	21.293	0.937152	1.05483			8.889	50.005	0.233291	2.47718			32.229	29.57	0.845846	1.46486					103.472	59.836	1.29428	1.13799			22.073	161.267
			68.741	41.756	1.0997	1.03008			25.594	65.88	0.409447	1.6252			72.468	26.599	1.15933	0.656172				41.521	22.179	1.08971	1.09872			5.122	52.967	0.134426	2.62392			36.344	30.353	0.953844	1.50365					69.034	57.96	0.863509	1.10231			24.635	130.991
			84.267	39.216	1.34808	0.967422			16.477	80.078	0.263595	1.97545			66.985	25.654	1.07161	0.63286				33.991	22.248	0.89209	1.10214			6.739	52.692	0.176864	2.61029			33.964	30.102	0.891381	1.49121					77.946	57.175	0.974984	1.08738			22.798	137.609
			87.419	49.227	1.39851	1.21438			16.816	60.426	0.269018	1.49065			62.218	27.06	0.995349	0.667545				33.922	20.08	0.890279	0.994738			5.372	49.5	0.140988	2.45217			33.804	32.756	0.887182	1.62269					82.423	61.256	1.03098	1.16499			24.718	107.873
			62.541	38.947	1.00052	0.960786			15.75	73.799	0.251965	1.82055			64.189	26.121	1.02688	0.644381				39.115	22.745	1.02657	1.12676			4.252	56.807	0.111593	2.81415			29.321	29.391	0.769526	1.45599					95.609	64.944	1.19592	1.23513			20.833	139.753
			98.638	44.972	1.57799	1.10942			21.871	80.119	0.349887	1.97646			68.357	25.587	1.09356	0.631207				38.02	22.35	0.99783	1.10719			4.773	47.599	0.125267	2.35799			34.623	33.574	0.908677	1.66321					94.313	68.009	1.17971	1.29342			22.055	150.097
			72.451	40.423	1.15905	0.997198			22.829	65.897	0.365213	1.62562			77.487	25.642	1.23962	0.632564				37.773	24.622	0.991348	1.21974			5.877	61.482	0.154241	3.04574			27.264	30.227	0.71554	1.49741					70.659	51.612	0.883835	0.981579			22.497	161.752
			106.273	48.732	1.70013	1.20217			27.082	77.891	0.433251	1.9215			95.018	29.357	1.52008	0.72421				43.658	22.909	1.1458	1.13488			6.484	32.963	0.170172	1.63295			32.774	32.189	0.86015	1.5946					90.554	57.844	1.13269	1.1001			19.967	90.34
			81.806	45.975	1.30871	1.13416			22.216	80.288	0.355406	1.98063			56.179	22.066	0.898738	0.544348				44.321	25.63	1.1632	1.26968			4.255	42.989	0.111672	2.12962			30.865	29.831	0.810048	1.47779					96.922	65.252	1.21234	1.24099			24.393	123.976
			74.485	41.429	1.19159	1.02201			26.079	87.36	0.417206	2.15509			64.358	23.413	1.02958	0.577577				35.431	21.405	0.929882	1.06038			2.264	30.784	0.0594184	1.525			30.694	29.649	0.80556	1.46877					77.861	60.718	0.973921	1.15476			22.491	143.923
			69.975	41.601	1.11944	1.02626			22.725	45.708	0.363549	1.12757			76.783	27.115	1.22836	0.668902				41.479	22.212	1.08861	1.10035			7.715	37.667	0.202479	1.86598			33.843	29.494	0.888206	1.4611					104.859	72.951	1.31162	1.38741			18.456	167.288
			67.167	39.007	1.07452	0.962266			19.661	81.872	0.314532	2.01971			70.874	28.611	1.13383	0.705807				42.26	24.776	1.10911	1.22737			5.81	48.867	0.152483	2.42081			41.917	30.748	1.10011	1.52322					96.619	59.355	1.20855	1.12884			24.099	172.47
			79.722	45.717	1.27537	1.1278			24.334	89.578	0.38929	2.20981			35.538	19.495	0.568529	0.480923				42.265	26.382	1.10924	1.30693			6.546	43.132	0.171799	2.1367			32.209	33.528	0.845321	1.66093					80.358	64.506	1.00515	1.2268			20.658	143.351
			77.659	44.536	1.24237	1.09866			18.433	72.32	0.294887	1.78407			69.192	25.999	1.10692	0.641371				41.045	26.576	1.07722	1.31654			2.005	26.69	0.052621	1.32219			31.838	29.829	0.835585	1.47769					140.389	72.18	1.75605	1.37275			21.943	141.861
			89.567	51.251	1.43287	1.26431			15.592	66.483	0.249437	1.64007			70.242	27.684	1.12371	0.682938				45.722	26.179	1.19997	1.29687			4.518	54.759	0.118574	2.71269			36.533	32.549	0.958804	1.61244					88.848	69.253	1.11135	1.31708			19.079	140.142
			82.495	41.587	1.31974	1.02591			22.254	90.618	0.356014	2.23546			72.351	24.635	1.15745	0.607722				47.939	26.261	1.25815	1.30094			5.597	57.475	0.146893	2.84724			30.953	31.31	0.812358	1.55106					83.752	63.959	1.04761	1.2164			21.489	129.792
			53.9	44.704	0.862279	1.10281			18.193	82.6	0.291047	2.03766			77.069	26.703	1.23293	0.658738				46.48	27.202	1.21986	1.34755			4.64	64.32	0.121776	3.18633			36.626	34.487	0.961245	1.70844					19.47	16.96	0.24354	0.322552			22.538	149.171
			83.404	37.189	1.33428	0.917418			25.232	81.544	0.403656	2.01161			70.489	30.244	1.12767	0.746091				38.908	26.422	1.02114	1.30891			5.038	54.817	0.132222	2.71556			31.826	31.929	0.83527	1.58172					17.142	16.387	0.21442	0.311655			21.681	169.042
			82.972	38.066	1.32737	0.939053			19.525	70.817	0.312356	1.74699			91.365	29.537	1.46164	0.72865				43.137	25.687	1.13213	1.2725			5.653	80.869	0.148362	4.00615			33.255	30.217	0.872774	1.49691					14.204	15.893	0.17767	0.30226			20.229	157.713
			82.031	40.08	1.31231	0.988736			22.734	87.981	0.363693	2.17041			79.792	25.164	1.27649	0.620772				39.128	26.322	1.02691	1.30396			4.978	70.886	0.130647	3.5116			32.659	32.856	0.857132	1.62764					33.554	22.22	0.419709	0.422589			18.986	105.695
			63.897	41.841	1.02221	1.03218			18.085	71.162	0.28932	1.7555			70.503	27.902	1.12789	0.688316				40.237	23.647	1.05602	1.17144			4.067	48.646	0.106738	2.40986			28.796	29.69	0.755748	1.4708					48.747	45.481	0.60975	0.864977			23.487	149.414
			73.964	54.103	1.18326	1.33467			23.867	83.105	0.381819	2.05012			55.718	24.865	0.891363	0.613396				11.677	13.944	0.306461	0.690768			3.647	32.161	0.0957151	1.59322			27.646	33.055	0.725566	1.6375					64.991	48.734	0.812937	0.926844			18.943	121.433
			88.787	39.427	1.42039	0.972627			31.897	119.467	0.510281	2.94714			82.586	27.329	1.32119	0.674181				46.03	24.889	1.20805	1.23297			4.233	73.854	0.111095	3.65863			36.491	33.501	0.957702	1.6596					34.579	28.229	0.43253	0.536871			16.856	116.848
			71.22	46.224	1.13936	1.1403			20.252	81.681	0.323987	2.01499			93.652	31.751	1.49822	0.783267				33.076	18.886	0.868076	0.935588			5.275	52.687	0.138442	2.61005			21.695	30.112	0.569383	1.49171					11.579	14.826	0.144835	0.281967			23.652	133.289
			87.891	35.967	1.40606	0.887272			22.293	99.06	0.356638	2.44372			30.553	16.938	0.48878	0.417845				36.586	21.159	0.960195	1.04819			5.849	43.829	0.153506	2.17123			34.279	31.879	0.899648	1.57925					0.645	2.792	0.00806795	0.0530994			22.979	174.138
			84.19	37.928	1.34685	0.935648			17.932	78.598	0.286872	1.93894			66.151	28.725	1.05827	0.708619				37.787	19.734	0.991715	0.977597			3.694	66.605	0.0969486	3.29953			33.972	31.769	0.891591	1.5738					78.471	52.131	0.981551	0.991449			24.193	152.557
			80.156	50.091	1.28232	1.2357			19.76	83.08	0.316116	2.04951			57.791	27.669	0.924527	0.682568				31.741	18.031	0.833039	0.893233			3.554	49.713	0.0932743	2.46272			22.387	31.405	0.587544	1.55576					68.014	52.006	0.85075	0.989072			21.8	159.486
			68.862	38.838	1.10164	0.958097			19.756	75.277	0.316052	1.85701			54.07	23.753	0.864999	0.585964				41.648	21.97	1.09305	1.08837			3.373	64.751	0.088524	3.20768			32.254	31.001	0.846502	1.53575					41.383	58.488	0.517637	1.11235			25.254	152.015
			94.146	38.861	1.50613	0.958665			20.959	98.445	0.335297	2.42855			74.737	29.591	1.19562	0.729982				35.531	20.391	0.932507	1.01014			1.534	33.258	0.0402596	1.64756			34.661	33.238	0.909674	1.64657					90.468	61.1	1.13162	1.16203			20.406	120.183
			88.541	39.881	1.41646	0.983827			16.181	88.433	0.25886	2.18156			75.85	26.927	1.21343	0.664264				26.175	16.844	0.68696	0.83443			3.687	40.757	0.0967649	2.01905			22.896	26.729	0.600903	1.32412					84.466	52.749	1.05654	1.0032			17.501	118.635
			80.856	37.691	1.29352	0.929802			18.382	106.63	0.294071	2.63046			46.033	26.228	0.736425	0.64702				34.393	18.214	0.90264	0.902298			1.587	32.792	0.0416506	1.62447			39.971	35.07	1.04903	1.73732					30.761	17.172	0.384773	0.326584			21.034	120.416
			86.218	42.38	1.3793	1.04547			18.051	89.446	0.288776	2.20655			55.57	29.86	0.888996	0.736618				40.75	17.957	1.06948	0.889567			4.226	55.283	0.110911	2.73865			43.02	36.825	1.12905	1.82426					9.613	12.421	0.120244	0.236228			26.633	133.83
			51.59	43.998	0.825325	1.08539			16.383	90.383	0.262091	2.22966			71.672	27.692	1.14659	0.683136				38.177	22.304	1.00195	1.10491			4.242	51.733	0.111331	2.56279			29.663	26.796	0.778502	1.32744					96.72	52.352	1.20982	0.995652			21.68	148.938
			83.749	39.653	1.3398	0.978202			19.751	108.575	0.315972	2.67844			75.639	32.031	1.21005	0.790175				33.322	18.248	0.874532	0.903983			4.564	46.916	0.119782	2.32416			30.427	30.886	0.798553	1.53005					91.018	58.834	1.13849	1.11893			17.583	99.55
			75.982	43.692	1.21554	1.07784			14.574	58.739	0.233151	1.44904			84.675	34.836	1.35461	0.859372				35.548	20.878	0.932953	1.03427			6.675	35.897	0.175185	1.77829			33.896	34.112	0.889596	1.68987					86.603	58.131	1.08327	1.10556			19.173	110.69
			63.895	40.934	1.02218	1.0098			22.985	89.959	0.367709	2.2192			74.255	29.424	1.18791	0.725863				30.058	19.86	0.788869	0.983839			5.532	57.262	0.145187	2.83669			27.257	32.032	0.715357	1.58682					64.922	45.51	0.812074	0.865528			21.898	140.611
			70.181	40.919	1.12274	1.00943			16.661	71.369	0.266539	1.76061			78.503	31.459	1.25587	0.776064				23.787	17.567	0.624287	0.870247			4.614	59.601	0.121094	2.95256			24.627	28.588	0.646333	1.41621					96.36	66.678	1.20531	1.26811			21.359	128.612
			85.737	42.466	1.3716	1.0476			6.409	38.951	0.10253	0.960885			69.046	30.78	1.10458	0.759314				30.761	17.572	0.807319	0.870495			5.416	56.265	0.142142	2.7873			32.995	35.654	0.86595	1.76625					86.197	50.853	1.07819	0.967144			17.8	131.049
			71.621	48.316	1.14578	1.19191			16.366	84.896	0.261819	2.0943			59.884	29.715	0.95801	0.733041				37.754	19.578	0.990849	0.969869			3.963	51.237	0.104008	2.53822			29.441	31.357	0.772676	1.55339					36.521	20.318	0.456821	0.386416			23.372	96.623
			71.284	47.897	1.14038	1.18157			21.6	84.624	0.345552	2.08759			82.957	34.518	1.32713	0.851527				34.308	20.103	0.900409	0.995877			3.888	43.892	0.10204	2.17435			15.155	24.076	0.397741	1.19269					66.948	47.954	0.837416	0.912009			20.778	117.603
			93.586	58.195	1.49717	1.43562									68.286	31.009	1.09242	0.764963				36.859	19.379	0.96736	0.960011			4.785	46.858	0.125582	2.32129			35.981	37.193	0.944317	1.84249					76.706	47.434	0.959474	0.90212			19.76	150.385
			83.049	51.726	1.3286	1.27603									87.546	34.003	1.40054	0.838822				29.57	20.74	0.776061	1.02743			4.411	49.424	0.115766	2.4484			40.703	39.684	1.06825	1.96589					81.187	58.669	1.01552	1.11579			22.519	127.552
			66.056	46.8	1.05675	1.15451									77.46	32.149	1.23919	0.793086				41.761	23.003	1.09601	1.13954			4.53	52.596	0.118889	2.60554			33	36.89	0.866081	1.82748					80.608	50.289	1.00828	0.956417			17.266	106.983
			77.921	49.016	1.24656	1.20918									79.045	32.068	1.26454	0.791088				31.988	21.558	0.839521	1.06796			7.322	59.643	0.192165	2.95464			46.035	37.86	1.20818	1.87554					76.666	52.093	0.958973	0.990726			19.719	114.924
			86.581	45.868	1.3851	1.13152									88.368	32.489	1.41369	0.801473				40.811	23.228	1.07108	1.15069			5.847	42.222	0.153454	2.09162			36.098	36.177	0.947388	1.79216					92.864	59.727	1.16159	1.13591			19.061	99.183
			60.665	37.764	0.970504	0.931603									73.393	31.637	1.17412	0.780455				36.242	24.95	0.951167	1.23599			5.154	48.987	0.135266	2.42675			22.557	23.534	0.592006	1.16584					73.89	46.972	0.92425	0.893333			18.465	97.988
			70.955	43.983	1.13512	1.08502									80.617	29.184	1.28969	0.719942				43.543	22.19	1.14278	1.09926			6.48	45.339	0.170067	2.24604			14.784	23.515	0.388004	1.1649					76.708	50.581	0.959499	0.961971			17.972	78.093
			69.404	39.836	1.11031	0.982717									66.913	31.212	1.07046	0.769971				37.211	19.937	0.976598	0.987654			5.71	51.708	0.149858	2.56155			26.384	24.5	0.692445	1.2137					73.12	50.437	0.914618	0.959232			19.762	166.098
			92.176	53.532	1.47461	1.32058									72.236	28.82	1.15561	0.710962				33.803	19.308	0.887156	0.956494			5.558	61.207	0.145869	3.03212			13.155	21.733	0.345251	1.07663					15.496	15.482	0.193831	0.294443			27.449	142.467
			60.461	37.778	0.967241	0.931948									70.736	30.157	1.13162	0.743945				39.371	19.527	1.03329	0.967343			4.248	53.449	0.111488	2.6478			25.141	22.186	0.659823	1.09907					85.451	48.049	1.06886	0.913816			13.601	87.955
			54.395	33.24	0.870198	0.82									71.504	29.241	1.1439	0.721348				35.993	19.959	0.944632	0.988743			5.629	57.523	0.147732	2.84962			23.654	21.369	0.620796	1.05859					78.505	48.187	0.981976	0.916441			18.327	107.138
			79.093	46.752	1.26531	1.15333									75.85	30.461	1.21343	0.751444				30.685	17.843	0.805324	0.88392			4.891	48.969	0.128364	2.42586			27.4	27.057	0.71911	1.34037					62.065	48.022	0.776337	0.913303			24.864	135.537
			85.035	47.306	1.36037	1.16699									63.393	25.975	1.01415	0.640779				33.133	18.232	0.869572	0.90319			4.695	55.722	0.12322	2.7604			25.444	23.853	0.667775	1.18165					86.27	56.538	1.0791	1.07526			14.569	103.602
			66.64	37.9	1.06609	0.934958									71.3	29.488	1.14064	0.727441				34.178	18.017	0.896998	0.892539			4.188	35.308	0.109914	1.74911			29.487	28.839	0.773883	1.42865					73.849	46.628	0.923737	0.886791			16.507	122.46
			49.526	32.789	0.792305	0.808874									66.558	27.146	1.06478	0.669666				43.469	21.574	1.14084	1.06875			3.54	58.402	0.0929069	2.89316			24.514	21.424	0.643367	1.06132					75.1	48.539	0.939385	0.923135			18.21	118.064
			86.885	51.49	1.38997	1.27021									59.621	30.526	0.953803	0.753048				40.527	16.497	1.06363	0.81724			5.657	62.746	0.148467	3.10836			30.76	26.847	0.807293	1.32997					72.159	50.3	0.902598	0.956626			19.646	121.229
			85.035	45.939	1.36037	1.13327									72.542	27.778	1.16051	0.685257				42.446	21.846	1.11399	1.08222			3.833	59.746	0.100597	2.95974			28.159	26.942	0.73903	1.33467					74.37	45.69	0.930254	0.868952			28.013	136.63
			79.849	51.437	1.27741	1.2689									80.215	31.159	1.28326	0.768663				34.023	19.268	0.89293	0.954512			4.393	51.398	0.115294	2.54619			30.14	29.614	0.791021	1.46704					87.039	60.587	1.08872	1.15227			26.634	133.933
			70.684	39.333	1.13079	0.970308									73.847	32.099	1.18139	0.791852				40.819	21.461	1.07129	1.06315			4.802	44.755	0.126028	2.21711			19.291	21.223	0.50629	1.05136					75.836	51.355	0.948591	0.976691			13.777	113.799
			72.86	37.111	1.1656	0.915494									54.318	26.404	0.868967	0.651362				37.307	17.456	0.979118	0.864748			7.62	40.048	0.199986	1.98393			23.349	22.406	0.612792	1.10996					71.578	54.668	0.89533	1.0397			15.898	137.669
			69.618	36.016	1.11373	0.888481									69.148	26.992	1.10621	0.665867				43.366	20.753	1.13814	1.02808			5.098	47.052	0.133796	2.3309			17.191	24.402	0.451176	1.20884					7.039	15.368	0.088047	0.292275			18.976	115.586
			67.405	48.293	1.07833	1.19134									69.779	26.771	1.11631	0.660416				31.715	16.857	0.832356	0.835074			3.774	53.7	0.0990482	2.66023			34.486	30.189	0.905081	1.49552					72.558	54.329	0.907589	1.03325			17.844	163.454
			83.069	51.337	1.32892	1.26644									70.377	26.623	1.12587	0.656765				43.224	22.905	1.13441	1.13468			3.604	55.306	0.0945866	2.73979			43.428	27.313	1.13976	1.35305					75.086	52.045	0.93921	0.989814			14.236	115.653
			81.66	49.876	1.30638	1.23039									70.903	29.017	1.13429	0.715822				29.869	15.232	0.783908	0.754574			5.242	36.078	0.137576	1.78726			25.472	29.547	0.66851	1.46372					70.371	43.923	0.880233	0.835346			23.756	108.412
			89.09	65.598	1.42524	1.61824									75.546	31.2	1.20857	0.769675				32.704	16.835	0.858313	0.833984			5.026	49.648	0.131907	2.4595			34.996	26.928	0.918466	1.33398					57.04	37.704	0.713482	0.71707			22.293	146.739
			80.275	54.108	1.28422	1.33479									75.637	28.706	1.21002	0.70815				42.515	20.024	1.1158	0.991964			5.22	54.163	0.136998	2.68317			42.191	33.69	1.1073	1.66896					72.017	47.017	0.900822	0.894189			21.239	112.549
			76.036	51.261	1.21641	1.26456									56.829	29.715	0.909137	0.733041				39.609	20.563	1.03953	1.01866			5.182	43.975	0.136001	2.17847			32.565	29.252	0.854665	1.44911					82.174	51.101	1.02787	0.97186			23.131	148.548
			78.604	49.9	1.25749	1.23099									70.074	29.404	1.12103	0.725369				33.852	15.821	0.888442	0.783752			6.218	39.453	0.163191	1.95445			37.68	31.334	0.988907	1.55225					82.496	57.766	1.0319	1.09862			24.388	158.487
			82.258	49.662	1.31594	1.22512									80.678	29.131	1.29067	0.718635				41.149	18.132	1.07995	0.898236			6.164	53.228	0.161773	2.63685			32.142	32.816	0.843563	1.62566					52.504	42.326	0.656744	0.804974			25.789	145.602
			88.173	55.786	1.41057	1.37619									64.207	25.681	1.02717	0.633526				42.778	18.734	1.1227	0.928059			4.401	56.606	0.115504	2.80419			37.346	30.324	0.980141	1.50221					73.192	51.742	0.915519	0.984051			20.894	144.454
			49.179	44.947	0.786754	1.1088									67.433	24.676	1.07878	0.608734				39.619	20.57	1.0398	1.01901			6.676	40.982	0.175211	2.0302			36.829	29.037	0.966573	1.43846					89.887	47.973	1.12435	0.912371			9.707	86.847
			33.816	31.005	0.54098	0.764864									72.946	29.119	1.16697	0.718339				42.603	18.985	1.11811	0.940493			4.966	52.16	0.130332	2.58394			3.708	8.713	0.097316	0.431631					81.598	55.455	1.02067	1.05467			10.212	73.814
			38.864	34.769	0.621737	0.857719									82.492	29.979	1.31969	0.739554				35.538	18.419	0.932691	0.912454			5.278	41.536	0.13852	2.05764			33.504	32.058	0.879308	1.58811					81.005	51.602	1.01325	0.981388			23.96	165.539
			75.503	47.401	1.20788	1.16934									78.571	29.745	1.25696	0.733781				37.309	17.611	0.97917	0.872427			4.233	48.233	0.111095	2.3894			46.097	34.589	1.20981	1.7135					79.011	51.191	0.988306	0.973572			16.877	119.582
			81.822	49.848	1.30897	1.2297									71.105	27.572	1.13752	0.680175				41.647	19.206	1.09302	0.951441			5.837	50.235	0.153191	2.48858			32.515	31.226	0.853352	1.5469					75.221	44.021	0.940899	0.83721			24.508	131.849
			77.746	53.834	1.24376	1.32803																39.835	18.102	1.04546	0.89675			3.791	30.865	0.0994943	1.52901			34.87	34.577	0.915159	1.7129					81.684	48.082	1.02174	0.914444			8.916	105.469
			82.13	48.396	1.3139	1.19388																37.499	20.178	0.984157	0.999592			4.052	33.189	0.106344	1.64414											85.834	50.012	1.07365	0.951149			17.208	140.127
			81.106	43.652	1.29751	1.07685																32.546	17.296	0.854166	0.856822			4.427	28.91	0.116186	1.43216											47.201	41.787	0.590412	0.794723			11.522	103.161
			85.505	47.372	1.36789	1.16862																34.735	19.275	0.911616	0.954859			3.428	24.045	0.0899675	1.19116											57.685	47.555	0.72155	0.904421			16.947	131.57
			70.925	42.911	1.13464	1.05857																33.988	17.118	0.892011	0.848004			1.826	23.394	0.0479232	1.15891											64.169	44.561	0.802655	0.84748			18.171	94.11
			87.321	52.931	1.39694	1.30576																38.509	21.324	1.01066	1.05636			4.556	51.137	0.119572	2.53326											65.411	44.387	0.818191	0.844171			15.296	122.118
			82.114	53.211	1.31364	1.31267																43.985	18.385	1.15438	0.91077			5.281	48.497	0.138599	2.40248											70.863	44.618	0.886387	0.848564			24.921	146.168
			83.362	52.136	1.33361	1.28615																33.737	17.025	0.885424	0.843397			3.439	22.53	0.0902561	1.11611											57.549	50.397	0.719849	0.958471			25.526	115.99
			27.641	30.195	0.442194	0.744882																37.004	18.129	0.971166	0.898088			5.586	50.481	0.146604	2.50076											73.096	47.533	0.914318	0.904003			24.52	146.125
			28.16	31.188	0.450497	0.769379																32.64	18.967	0.856633	0.939601			4.643	63.14	0.121855	3.12788											68.88	49.508	0.861582	0.941564			4.478	50.133
			85.319	53.107	1.36491	1.3101																34.151	18.867	0.896289	0.934647			4.779	33.323	0.125424	1.65078											76.189	45.775	0.953007	0.870568			20.235	136.869
			36.368	35.181	0.581807	0.867882																38.036	18.722	0.99825	0.927464			4.284	41.677	0.112433	2.06463											72.494	49.089	0.906788	0.933595			20.922	143.309
			82.127	46.584	1.31385	1.14918																36.501	18.286	0.957964	0.905865			6.075	29.725	0.159438	1.47254											66.081	46.601	0.826571	0.886277			11.189	107.217
			72.935	51.21	1.1668	1.2633																43.007	18.868	1.12871	0.934697			5.841	28.754	0.153296	1.42444											77.022	54.403	0.963426	1.03466			23.045	145.576
			72.731	38.994	1.16353	0.961946																47.887	19.649	1.25679	0.973386			5.172	53.49	0.135739	2.64983											72.723	42.956	0.909652	0.816955			13.218	123.644
			72.096	41.698	1.15337	1.02865																38.705	17.568	1.01581	0.870296			3.714	68.56	0.0974735	3.39638											60.836	51.575	0.760964	0.980875			25.793	174.581
			79.857	43.659	1.27753	1.07703																31.161	18.355	0.817817	0.909283			4.569	36.012	0.119913	1.78399											68.176	48	0.852777	0.912884			22.555	106.12
			72.385	41.588	1.158	1.02594																13.294	13.439	0.348899	0.665751																	83.244	50.239	1.04125	0.955466			12.062	90.981
			86.835	44.955	1.38917	1.109																40.481	17.384	1.06242	0.861181																	73.989	48.236	0.925488	0.917372			15.189	121.732
			79.13	44.254	1.2659	1.0917																37.11	19.023	0.973948	0.942375																	75.898	47.086	0.949367	0.895501			24.38	128.049
			77.439	39.102	1.23885	0.96461																48.846	20.675	1.28196	1.02421																	65.045	43.825	0.813613	0.833482			23.59	126.213
			79.719	40.062	1.27533	0.988292																40.338	22.074	1.05867	1.09352																	74.574	48.077	0.932806	0.914349			14.637	88.679
			99.934	54.361	1.59872	1.34104																42.697	19.505	1.12058	0.966253																	65.71	45.356	0.821931	0.862599			15.508	92.282
			65.597	41.494	1.04941	1.02362																39.861	19.848	1.04615	0.983245																	77.424	49.786	0.968455	0.946851			19.967	138.437
			80.362	40.908	1.28561	1.00916																46.223	24.028	1.21312	1.19032																	61.831	45.105	0.77341	0.857826			21.574	89.515
			78.875	38	1.26182	0.937424																45.349	21.791	1.19018	1.0795																	49.762	42.219	0.622446	0.802939			24.85	125.604
			86.06	41.118	1.37677	1.01434																43.557	21.248	1.14315	1.0526																	83.471	51.929	1.04409	0.987607			17.849	106.965
			75.618	45.994	1.20972	1.13463																38.049	19.867	0.998591	0.984186																	72.552	49.35	0.907514	0.938559			15.87	88.406
			84.34	55.043	1.34925	1.35786																44.71	21.101	1.17341	1.04532																	68.863	40.022	0.86137	0.761155			28.883	115.611
			83.104	39.507	1.32948	0.974601																36.428	22.554	0.956049	1.1173																	68.63	41.59	0.858455	0.790976			12.178	116.29
			80.243	46.977	1.28371	1.15888																49.432	26.019	1.29734	1.28895																	71.38	45.061	0.892854	0.856989			17.075	135.528
			62.198	34.714	0.995029	0.856362																44.829	21.257	1.17653	1.05304																	55.198	41.553	0.690442	0.790272			10.217	76.878
			82.666	39.478	1.32247	0.973885																46.994	23.322	1.23335	1.15534																	59.716	42.773	0.746955	0.813475			25.436	128.893
			93.739	54.191	1.49961	1.33684																44.118	22.989	1.15787	1.13885																	71.233	43.745	0.891015	0.831961			16.233	104.759
			70.599	39.234	1.12943	0.967866																42.834	24.475	1.12417	1.21246																	69.956	46.248	0.875042	0.879564			22.798	131.833
			81.392	39.778	1.30209	0.981286																41.959	22.97	1.10121	1.1379																	68.807	42.389	0.860669	0.806172			24.215	128.791
			85.982	40.975	1.37552	1.01081																47.479	22.407	1.24608	1.11001																	64.638	43.218	0.808522	0.821938			21.753	160.07
			80.085	48.976	1.28118	1.20819																48.25	23.855	1.26632	1.18175																	78.945	46.116	0.98748	0.877053			10.905	74.453
			79.409	43.452	1.27037	1.07192																41.264	23.996	1.08297	1.18873																	65.051	44.472	0.813688	0.845787			17.676	102.409
			78.485	39.687	1.25558	0.979041																																				74.122	53.096	0.927152	1.0098			22.982	125.42
			68.646	38.03	1.09818	0.938165																																				47.856	39.874	0.598605	0.75834			17.616	143.396
			86.039	47.99	1.37643	1.18387																																				84.047	50.483	1.0513	0.960107			22.635	120.976
			65.562	42.384	1.04885	1.04557																																				70.861	42.512	0.886362	0.808511			22.474	132.263
			83.754	43.025	1.33988	1.06139																																				62.044	47.48	0.776075	0.902995			13.195	90.394
			69.858	43.144	1.11757	1.06432																																				74.07	45.247	0.926501	0.860526			23.815	103.395
			76.674	50.588	1.22661	1.24796																																				63.304	45.078	0.791835	0.857312			24.032	130.706
			79.438	54.56	1.27083	1.34594																																				79.5	44.496	0.994422	0.846244			19.909	129.392
			97.365	56.865	1.55762	1.40281																																				73.216	45.585	0.915819	0.866955			13.225	106.42
																																										65.931	42.676	0.824695	0.81163			26.448	164.672
																																										72.583	46.001	0.907901	0.874866			19.75	122.244
																																										74.842	45.958	0.936158	0.874048			19.778	141.567
																																										61.871	45.121	0.773911	0.85813			22.222	129.242
																																										61.561	44.745	0.770033	0.850979			28.729	161.594
																																										70.573	46.317	0.882759	0.880876			26.41	104.362
																																										58.917	41.799	0.736961	0.794951			17.303	126.662
																																										93.857	53.877	1.17401	1.02466			21.294	120.469
																																										72.781	48.167	0.910378	0.91606			21.218	113.965
																																										71.891	44.583	0.899245	0.847898			19.171	153.149
																																										83.323	46.306	1.04224	0.880667			21.9	138.161
																																										42.695	40.421	0.534049	0.768744			19.963	139.232
																																										69.07	45.814	0.863959	0.87131			16.739	93.219
																																										59.141	41.257	0.739763	0.784643			18.236	130.493
																																										79.867	46.792	0.999013	0.88991			11.533	69.899
																																										72.994	43.695	0.913042	0.83101			14.189	80.265
																																										71.31	46.858	0.891978	0.891165			18.852	152.271
																																										68.584	45.073	0.85788	0.857217			16.34	103.284
																																										63.179	43.954	0.790272	0.835936			7.391	79.183
																																										61.384	40.923	0.767819	0.778291			19.645	120.729
																																										62.432	41.999	0.780928	0.798755			16.727	99.372
																																										53.458	39.179	0.668677	0.745123			19.446	144.146
																																										65.452	48.224	0.818703	0.917144			21.948	121.758
																																										63.76	42.643	0.797539	0.811002			19.88	153.063
																																										67.27	48.723	0.841444	0.926634			18.683	143.557
																																										72.522	52.204	0.907138	0.992838			20.17	124.499
																																										68.574	45.363	0.857755	0.862733			20.376	113.909
																																										82.642	51.856	1.03372	0.986219			16.878	112.025
																																										70.093	46.961	0.876755	0.893124			21.075	147.479
																																										70.912	43.98	0.887	0.83643			20.825	116.675
																																										63.476	55.597	0.793987	1.05737			19.291	165.5
																																										73.886	48.816	0.9242	0.928403			20.258	115.291
																																										72.636	48.446	0.908564	0.921366			17.975	103.939
																																										68.621	50.244	0.858343	0.955561			18.651	144.264
																																										76.136	45.671	0.952344	0.86859			18.392	123.963
																																										63.838	47.011	0.798515	0.894075			18.46	132.687
																																										63.952	43.295	0.799941	0.823402			17.042	110.077
																																										52.977	44.011	0.66266	0.83702			18.426	129.069
																																										72.957	44.125	0.912579	0.839188			20.099	133.069
																																										67.275	49.492	0.841506	0.94126			18.432	111.562
																																										60.804	45.009	0.760564	0.856			7.409	81.95
																																										69.714	44.196	0.872015	0.840538			15.633	112.893
																																										82.566	53.979	1.03277	1.0266			16.875	108.328
																																										85.242	54.181	1.06625	1.03044			16.483	79.632
																																										53.497	38.113	0.669165	0.724849			19.364	144.781
																																										65.315	42.613	0.81699	0.810432			8.593	93.639
																																										69.169	41.224	0.865197	0.784015			7.569	89.69
																																										61.033	48.708	0.763429	0.926349			18.005	161.802
																																										68.881	46.974	0.861595	0.893371			8.598	84.645
																																										66.212	49.102	0.82821	0.933842			17.449	73.097
																																										63.52	45.276	0.794537	0.861078			20.55	108.986
																																										72.579	45.747	0.907851	0.870036			17.397	95.472
																																										71.192	46.987	0.890502	0.893618			20.586	133.611
																																										76.186	49.567	0.952969	0.942686			19.669	140.278
																																										64.446	44.058	0.80612	0.837913			17.585	118.29
																																										64.417	45.212	0.805757	0.859861			19.638	111.87
																																										67.22	51.95	0.840818	0.988007			7.119	79.501
																																										67.645	46.998	0.846135	0.893828			19.123	110.095
																																										47.919	37.173	0.599393	0.706972			19.559	133.881
																																										39.584	38.698	0.495135	0.735975			14.551	96.035
																																										71.071	48.441	0.888989	0.921271			17.755	85.177
																																										92.16	58.279	1.15278	1.10837			19.813	139.504
																																										55.746	40.234	0.697296	0.765187			19.986	94.802
																																										88.634	51.193	1.10867	0.97361			20.475	114.252
																																										66.56	52.182	0.832563	0.992419
																																										68.524	48.306	0.857129	0.918704
																																										57.551	48.162	0.719874	0.915965
																																										70.776	46.726	0.885299	0.888655
																																										76.022	47.794	0.950918	0.908966
																																										82.983	51.766	1.03799	0.984507
																																										61.814	44.955	0.773198	0.854973
																																										80.49	52.895	1.00681	1.00598
																																										38.419	41.715	0.480562	0.793353
																																										68.324	48.235	0.854628	0.917353
																																										72.1	46.387	0.90186	0.882207
																																										39.98	41.391	0.500088	0.787191
																																										75.805	49.559	0.948204	0.942534
																																										69.566	50.565	0.870163	0.961666
																																										73.647	48.726	0.92121	0.926691
																																										72.452	50.106	0.906263	0.952937
																																										72.301	54.613	0.904374	1.03865
																																										71.681	49.011	0.896619	0.932112
																																										70.271	49.35	0.878982	0.938559
																																										87.516	48.881	1.09469	0.929639
																																										65.473	44.809	0.818966	0.852196
																																										80.954	54.644	1.01261	1.03924
																																										80.018	47.722	1.0009	0.907597
																																										67.535	42.641	0.844759	0.810964
																																										74.137	54.354	0.927339	1.03373
																																										77.523	47.978	0.969693	0.912466
																																										76.352	45.38	0.955046	0.863056
																																										82.105	52.965	1.02701	1.00731
																																										31.989	45.483	0.400133	0.865015
																																										65.284	48.493	0.816602	0.92226
																																										72.31	47.183	0.904486	0.897346
																																										86.913	49.584	1.08715	0.943009
																																										64.401	48.93	0.805557	0.930571
																																										84.128	48.529	1.05231	0.922945
																																										70.82	60.346	0.885849	1.14769
																																										64.554	47.391	0.807471	0.901302
																																										78.334	50.794	0.979837	0.966022
																																										72.685	44.893	0.909177	0.853794
																																										74.596	53.447	0.933081	1.01648
																																										57.232	45.585	0.715884	0.866955
																																										83.839	56.295	1.0487	1.07064
																																										63.747	52.359	0.797377	0.995785
																																										72.941	45.153	0.912379	0.858739
																																										78.212	45.32	0.978311	0.861915
																																										71.364	57.628	0.892653	1.09599
																																										53.069	47.137	0.663811	0.896471
																																										67.075	48.312	0.839005	0.918818
																																										75.66	51.269	0.94639	0.975055
																																										69.451	55.592	0.868725	1.05727
																																										78.247	53.71	0.978749	1.02148
																																										74.376	44.604	0.930329	0.848298
																																										90.678	53.189	1.13424	1.01157
																																										81.498	61.591	1.01941	1.17136
																																										80.953	56.788	1.0126	1.08002
																																										87.739	63.414	1.09748	1.20603
																																										84.942	49.086	1.06249	0.933538
																																										95.848	59.71	1.19891	1.13559
																																										79.083	50.506	0.989206	0.960544
																																										72.699	44.626	0.909352	0.848716
																																										91.031	61.476	1.13866	1.16918
																																										70.187	43.243	0.877931	0.822413
																																										16.349	17.186	0.204501	0.326851
																																										79.696	66.987	0.996874	1.27399
																																										78.941	53.205	0.98743	1.01187
																																										77.67	58.724	0.971532	1.11684
																																										52.643	53.375	0.658483	1.01511
																																										79.56	57.559	0.995173	1.09468
																																										53.172	55.804	0.6651	1.0613
																																										78.786	51.386	0.985491	0.97728
																																										82.391	58.47	1.03058	1.11201
																																										60.669	44.75	0.758876	0.851074
																																										111.229	52.519	1.3913	0.998828
																																										110.698	45.116	1.38466	0.858035
																																										87.744	48.525	1.09754	0.922869
																																										80.978	39.705	1.01291	0.755126
																																										93.021	47.804	1.16355	0.909156
																																										104.335	38.743	1.30507	0.736831
																																										96.933	41.606	1.21248	0.79128
																																										89.263	42.525	1.11654	0.808758
																																										128.081	39.397	1.6021	0.749269
																																										89.632	38.688	1.12116	0.735785
																																										94.34	51.146	1.18005	0.972716
																																										71.327	39.292	0.892191	0.747272
																																										99.58	42.141	1.24559	0.801455
																																										93.712	40.275	1.17219	0.765967
																																										92.194	44.355	1.1532	0.843562
																																										53.346	29.395	0.667276	0.559046
																																										104.623	41.458	1.30867	0.788466
																																										98.431	37.677	1.23122	0.716557
																																										94.097	45.462	1.17701	0.864615
																																										84.742	37.52	1.05999	0.713571
																																										93.661	42.558	1.17155	0.809386
																																										88.181	38.573	1.10301	0.733597
																																										66.925	43.944	0.837128	0.835745
																																										96.24	46.27	1.20381	0.879982
																																										109.73	51.387	1.37255	0.977299
																																										103.528	45.423	1.29498	0.863874
																																										111.94	46.43	1.4002	0.883025
																																										81.254	44.353	1.01636	0.843524
																																										121.934	50.768	1.52521	0.965527
																																										110.217	43.081	1.37864	0.819333
																																										77.916	46.993	0.974609	0.893733
																																										104.832	52.263	1.31129	0.99396
																																										73.384	49.332	0.917921	0.938217
																																										102.823	51.534	1.28616	0.980095
																																										91.948	44.101	1.15013	0.838731
																																										109.309	49.797	1.36729	0.94706
																																										103.729	52.5	1.29749	0.998467
																																										100.777	47.132	1.26056	0.896376
																																										100.34	53.396	1.2551	1.01551
																																										98.796	49.773	1.23579	0.946604
																																										110.039	50.159	1.37642	0.953945
																																										76.704	45.889	0.959449	0.872736
																																										64.387	48.047	0.805382	0.913778
																																										87.701	48.841	1.097	0.928879
																																										80.717	54.059	1.00965	1.02812
																																										107.251	52.266	1.34154	0.994017
																																										95.454	49.029	1.19398	0.932454
																																										88.704	52.474	1.10955	0.997973
																																										90.6	50.44	1.13327	0.959289
																																										12.654	20.641	0.158282	0.392559
																																										109.862	62.77	1.3742	1.19379
																																										105.884	58.645	1.32445	1.11534
																																										111.873	60.742	1.39936	1.15522
																																										93.769	58.236	1.17291	1.10756
																																										34.741	37.629	0.434556	0.715644
																																										89.016	55.633	1.11345	1.05805
																																										100.189	58.34	1.25321	1.10953
																																										83.543	57.974	1.04499	1.10257
																																										96.389	55.015	1.20568	1.0463
																																										105.942	51.493	1.32517	0.979315
																																										84.307	63.53	1.05455	1.20824
																																										98.004	45.653	1.22588	0.868248
																																										99.178	46.308	1.24056	0.880705
																																										110.088	60.747	1.37703	1.15531
																																										78.581	45.301	0.982927	0.861553
																																										85.524	49.891	1.06977	0.948848
																																										102.948	49.157	1.28772	0.934888
																																										111.765	56.704	1.39801	1.07842
																																										93.068	58.648	1.16414	1.11539
																																										96.833	45.602	1.21123	0.867278
																																										86.626	52.054	1.08356	0.989985
																																										103.495	50.542	1.29456	0.961229
																																										102.166	52.128	1.27794	0.991392
																																										99.381	47.851	1.2431	0.91005
																																										88.668	43.703	1.1091	0.831162
																																										104.422	58.651	1.30616	1.11545
																																										102.815	51.605	1.28606	0.981446
																																										100.797	55.971	1.26081	1.06448
																																										99.579	45.078	1.24558	0.857312
																																										98.382	48.962	1.23061	0.93118
																																										101.83	50.758	1.27374	0.965337
																																										110.038	52.865	1.37641	1.00541
																																										96.657	49.273	1.20903	0.937095
																																										94.152	50.565	1.1777	0.961666
																																										80.91	52.674	1.01206	1.00178
																																										102.04	57.193	1.27636	1.08772
																																										64.883	46.445	0.811586	0.88331
																																										97.079	56.998	1.21431	1.08401
																																										88.125	52.844	1.10231	1.00501
																																										88.798	53.883	1.11073	1.02477
																																										102.137	50.261	1.27758	0.955885
																																										91.182	63.369	1.14055	1.20518
																																										104.555	60.905	1.30782	1.15832
																																										91.14	60.998	1.14002	1.16009
																																										77.402	58.092	0.96818	1.10482
																																										53.344	46.565	0.667251	0.885593
																																										74.871	49.945	0.936521	0.949875
																																										86.235	55.982	1.07867	1.06469
																																										79.76	52.003	0.997674	0.989015
																																										50.126	48.956	0.626999	0.931066
																																										88.204	53.418	1.1033	1.01593
																																										81.545	81.905	1.02	1.5577
																																										119.271	74.685	1.4919	1.42039
																																										111.203	78.701	1.39098	1.49677
																																										101.034	71.97	1.26378	1.36876
																																										92.225	79.271	1.15359	1.50761
																																										117.365	69.739	1.46805	1.32633
																																										102.902	72.024	1.28715	1.36978
																																										106.271	67.833	1.32929	1.29008
																																										124.289	79.816	1.55466	1.51797
																																										99.146	70.651	1.24016	1.34367
																																										106.324	72.036	1.32995	1.37001
																																										97.549	69.945	1.22019	1.33024
																																										99.051	75.375	1.23898	1.43351
																																										94.945	67.644	1.18762	1.28648
																																										115.168	69.721	1.44057	1.32598
																																										111.525	79.914	1.39501	1.51984
																																										105.863	77.941	1.32418	1.48231
																																										107.099	63.4	1.33964	1.20577
																																										95.354	66.012	1.19273	1.25544
																																										102.656	77.677	1.28407	1.47729
																																										96.287	63.714	1.2044	1.21174
																																										104.137	67.26	1.30259	1.27918
																																										100.822	68.676	1.26113	1.30611
																																										65.082	63.214	0.814075	1.20223
																																										82.786	66.664	1.03553	1.26784
																																										79.707	66.544	0.997012	1.26556
																																										91.853	68.844	1.14894	1.3093
																																										94.527	69.977	1.18239	1.33085
																																										98.471	61.605	1.23172	1.17163
																																										106.073	72.64	1.32681	1.3815
																																										88.69	58.418	1.10938	1.11102
																																										93.579	56.914	1.17053	1.08241
																																										43.476	53.465	0.543818	1.01682
																																										98.329	65.447	1.22994	1.2447
																																										90.334	61.878	1.12994	1.17682
																																										114.876	70.305	1.43692	1.33709
																																										67.451	63.525	0.843708	1.20815
																																										69.536	48.698	0.869788	0.926159
																																										82.858	63.93	1.03643	1.21585
																																										73.037	43.375	0.91358	0.824924
																																										100.416	70.696	1.25605	1.34453
																																										72.224	54.975	0.903411	1.04554
																																										63.561	52.168	0.79505	0.992153
																																										76.306	56.521	0.95447	1.07494
																																										90.959	59.833	1.13776	1.13793
																																										88.716	61.491	1.1097	1.16946
																																										81.252	67.989	1.01634	1.29304
																																										75.211	58.354	0.940774	1.1098
																																										58.481	57.802	0.731507	1.0993
																																										64.07	46.435	0.801417	0.88312
																																										97.598	68.708	1.2208	1.30672
																																										105.654	65.579	1.32157	1.24721
																																										85.434	50.11	1.06865	0.953013
																																										70.09	53.992	0.876718	1.02684
																																										80.683	71.895	1.00922	1.36733
																																										67.619	52.425	0.845809	0.997041
																																										90.529	57.338	1.13238	1.09048
																																										93.045	76.268	1.16385	1.4505
																																										55.549	51.662	0.694832	0.98253
																																										98.462	69.689	1.23161	1.32537
																																										107.601	59.417	1.34592	1.13002
																																										76.445	54.699	0.956209	1.04029
																																										63.358	57.499	0.792511	1.09354
																																										90.827	53.232	1.13611	1.01239
																																										103.344	73.906	1.29267	1.40558
																																										103.29	67.256	1.292	1.2791
																																										107.668	61.112	1.34676	1.16225
																																										94.111	67.326	1.17718	1.28043
																																										110.272	59.897	1.37933	1.13915
																																										86.854	57.676	1.08641	1.09691
																																										101.016	83.106	1.26355	1.58054
																																										104.437	69.223	1.30635	1.31651
																																										85.809	65.485	1.07334	1.24542
																																										95.73	68.034	1.19743	1.2939
																																										93.574	67.566	1.17047	1.285
																																										102.683	68.938	1.28441	1.31109
																																										111.676	69.602	1.39689	1.32372
																																										92.503	66.39	1.15707	1.26263
																																										103.757	75.905	1.29784	1.44359
																																										102.584	76.103	1.28317	1.44736
																																										88.459	72.661	1.10649	1.3819
																																										77.428	71.814	0.968505	1.36579
																																										69.807	54.542	0.873178	1.0373
																																										8.675	26.991	0.108511	0.513326
																																										110.537	75.014	1.38265	1.42665
																																										124.501	74.007	1.55732	1.4075
																																										107.452	70.763	1.34406	1.3458
																																										110.899	69.838	1.38718	1.32821
																																										107.592	76.965	1.34581	1.46375
																																										106.108	66.201	1.32725	1.25904
																																										98.873	64.943	1.23675	1.23511
																																										124.496	67.174	1.55725	1.27754
																																										112.102	67.141	1.40222	1.27692
																																										115.625	70.296	1.44629	1.33692
																																										62.578	60.66	0.782754	1.15366
																																										113.547	63.949	1.4203	1.21621
																																										114.766	65	1.43555	1.2362
																																										91.272	58.2	1.14167	1.10687
																																										120.087	65.622	1.5021	1.24803
																																										75.969	64.683	0.950255	1.23017
																																										118.714	69.896	1.48493	1.32931
																																										79.191	58.682	0.990557	1.11604
																																										109.669	60.222	1.37179	1.14533
																																										90.031	58.916	1.12615	1.12049
																																										84.224	58.359	1.05351	1.1099
																																										105.766	71.994	1.32297	1.36921
																																										99.897	64.686	1.24956	1.23023
																																										95.839	55.375	1.1988	1.05314
																																										91.186	63.773	1.1406	1.21286
																																										110.977	61.54	1.38815	1.17039
																																										89.224	52.195	1.11605	0.992666
																																										100.689	56.281	1.25946	1.07038
																																										96.19	56.355	1.20319	1.07178
																																										79.035	57.325	0.988606	1.09023
																																										66.511	53.043	0.83195	1.00879
																																										89.848	61.415	1.12386	1.16802
																																										77.2	64.84	0.965653	1.23315
																																										98.321	54.286	1.22984	1.03243
																																										114.472	59.625	1.43187	1.13397
																																										106.948	57.662	1.33775	1.09664
																																										34.622	53.076	0.433068	1.00942
																																										77.181	51.298	0.965415	0.975607
																																										81.589	67.556	1.02055	1.28481
																																										78.19	61.957	0.978036	1.17832
																																										72.211	45.485	0.903248	0.865053
																																										83.781	62.025	1.04797	1.17962
																																										90.334	73.419	1.12994	1.39631
																																										98.208	60.232	1.22843	1.14552
																																										77.584	54.328	0.970456	1.03323
																																										112.649	70.337	1.40907	1.3377
																																										109.372	68.709	1.36807	1.30674
																																										87.661	62.556	1.0965	1.18972
																																										111.999	67.616	1.40093	1.28595
																																										94.478	51.331	1.18177	0.976234
																																										35.793	42.08	0.447715	0.800295
																																										89.655	65.214	1.12145	1.24027
																																										87.971	60.415	1.10038	1.149
																																										89.334	55.526	1.11743	1.05602
																																										84.078	51.433	1.05169	0.978174
																																										91.642	60.83	1.1463	1.15689
																																										81.701	81.656	1.02195	1.55297
																																										98.77	59.29	1.23546	1.1276
																																										42.932	70.024	0.537013	1.33175
																																										92.87	72.851	1.16166	1.38551
																																										89.985	68.445	1.12557	1.30172
																																										112.99	60.22	1.41333	1.14529
																																										63.936	59.517	0.799741	1.13192
																																										60.328	69.251	0.75461	1.31704
																																										75.213	58.217	0.940799	1.1072
																																										87.078	61.837	1.08921	1.17604
																																										68.682	66.3	0.859106	1.26092
																																										62.901	57.657	0.786794	1.09654
																																										44.717	61.439	0.559341	1.16847
																																										23.381	48.911	0.29246	0.93021
																																										72.256	62.197	0.903811	1.18289
																																										52.026	47.229	0.650765	0.898221
																																										54.503	48.808	0.681748	0.928251
																																										37.849	52.292	0.473433	0.994511
																																										48.62	51.757	0.608161	0.984336
																																										62.354	55.858	0.779952	1.06233
																																										58.797	57.937	0.73546	1.10187
																																										68.492	65.559	0.856729	1.24683
																																										26.291	44.762	0.32886	0.851302
																																										46.602	60.483	0.582919	1.15029
																																										58.643	48.669	0.733533	0.925607
																																										48.854	47.225	0.611088	0.898145
																																										79.85	56.875	0.9988	1.08167
																																										38.044	46.552	0.475872	0.885345
																																										58.634	46.154	0.733421	0.877776
																																										79.42	50.288	0.993422	0.956398
																																										15.321	52.103	0.191642	0.990917
																																										80.748	60.24	1.01003	1.14567
																																										76.364	54.339	0.955196	1.03344
																																										67.488	49.827	0.844171	0.947631
																																										63.749	50.62	0.797402	0.962712
																																										92.129	49.617	1.15239	0.943637
																																										61.851	72.001	0.773661	1.36935
																																										60.57	52.069	0.757637	0.99027
																																										83.797	57.26	1.04817	1.08899
																																										42.842	42.716	0.535887	0.812391
																																										57.165	54.953	0.715046	1.04512
																																										67.156	53.535	0.840018	1.01815
																																										71.836	73.745	0.898557	1.40251
																																										78.886	63.523	0.986742	1.20811
																																										39.718	45.737	0.496811	0.869845
																																										49.361	43.086	0.61743	0.819428
																																										71.495	49.868	0.894292	0.948411
																																										53.359	52.671	0.667439	1.00172
																																										39.374	42.386	0.492508	0.806115
																																										18.581	46.11	0.23242	0.876939
																																										73.747	58.829	0.922461	1.11883
																																										58.748	47.501	0.734847	0.903394
																																										28.145	42.336	0.352051	0.805164
																																										52.018	40.005	0.650665	0.760832
																																										32.56	42.4	0.407275	0.806381
																																										60.627	50.279	0.75835	0.956227
																																										59.677	50.432	0.746467	0.959137
																																										69.531	76.178	0.869725	1.44879
																																										74.949	56.194	0.937496	1.06872
																																										76.159	60.189	0.952632	1.1447
																																										49.097	49.161	0.614128	0.934964
																																										71.294	71.263	0.891778	1.35531
																																										68.09	55.095	0.851701	1.04782
																																										67.818	65.91	0.848298	1.2535
																																										53.678	50.679	0.671429	0.963834
																																										51.832	50.401	0.648338	0.958547
																																										70.792	66.239	0.885499	1.25976
																																										61.566	55.044	0.770096	1.04685
																																										87.892	66.988	1.09939	1.27401
[truncated: 18 more columns]

## Sheet: F5L
SOX2 and LEF1 level analysis of hESCs cultured in YSLC conditioned medium in 2D in the presence of WNT3a
units= fluorescence intensity (a.u.)
		Exp 1	157.493	18.0702	1	1			76.2487	112.343	0.48414	6.21701			96.8361	17.5564	0.614859	0.971566			Exp 2	90.6261	39.5365	1	1			33.6506	139.029	0.371312	3.51646			45.9028	73.2901	0.506508	1.85373			Exp 3	22.7565	3.29814	1	1			6.77412	14.2726	0.297679
		Control	SOX2	LEF1	SOX2	LEF1		+ WNT3a	SOX2	LEF1	SOX2	LEF1		+ WNT3a + YSLC CM	SOX2	LEF1	SOX2	LEF1			Control	SOX2	LEF1	SOX2	LEF1		+ WNT3a	SOX2	LEF1	SOX2	LEF1		+ WNT3a + YSLC CM	SOX2	LEF1	SOX2	LEF1			Control	SOX2	LEF1	SOX2	LEF1		+ WNT3a	SOX2	LEF1	SOX2
			159.074	16.674	1.01004	0.922734			45.106	136.031	0.2864	7.52792			12.34	13.062	0.0783526	0.722847				71.7	47.31	0.791163	1.19662			37.637	112.494	0.4153	2.84532			54.827	42.025	0.60498	1.06294				44.46	5.1	1.95373	1.54633			13.984	14.948	0.614506
			175.062	16.326	1.11155	0.903476			21.648	50.615	0.137454	2.80102			126.364	18.475	0.802346	1.0224				66.098	47.816	0.729348	1.20941			16.238	148.646	0.179176	3.75971			63.816	47.478	0.704168	1.20086				23.229	4.398	1.02076	1.33348			7.241	12.057	0.318195
			192.136	20.289	1.21996	1.12279			26.365	104.806	0.167404	5.79993			89.306	18.312	0.567047	1.01338				65.758	43.646	0.725597	1.10394			31.242	81.655	0.344735	2.06531			32.923	121.264	0.363284	3.06714				29.174	4.093	1.28201	1.241			12.649	9.078	0.555842
			145.594	18.558	0.924447	1.02699			33.837	87.795	0.214847	4.85855			192.491	21.034	1.22222	1.16402				68.738	48.312	0.758479	1.22196			14.692	213.339	0.162117	5.396			67.33	101.51	0.742943	2.5675				21.438	3.665	0.942061	1.11123			13.324	10.247	0.585503
			145.703	15.666	0.925139	0.866952			37.284	102.284	0.236734	5.66037			142.121	19.669	0.902395	1.08848				64.854	46.996	0.715622	1.18867			44.511	187.165	0.49115	4.73398			58.581	84.342	0.646403	2.13327				27.237	3.839	1.19689	1.16399			12.715	10.191	0.558742
			161.236	19.341	1.02377	1.07033			49.7	105.955	0.315569	5.86352			117.738	19.348	0.747575	1.07071				64.644	52.367	0.713304	1.32452			17.977	182.242	0.198364	4.60946			63.544	66.898	0.701167	1.69206				17.947	3.232	0.788654	0.979946			11.308	8	0.496913
			158.791	17.072	1.00824	0.94476			5.815	13.054	0.0369222	0.722405			116.301	19.077	0.738451	1.05572				64.008	47.788	0.706287	1.20871			28.878	86.128	0.31865	2.17844			33.398	87.303	0.368525	2.20816				46.626	4.467	2.04891	1.3544			18.089	14.048	0.794894
			173.974	18.667	1.10464	1.03303			40.213	107.825	0.255332	5.96701			186.082	20.01	1.18152	1.10735				70.658	42.22	0.779665	1.06787			61.028	192.751	0.673404	4.87526			66.741	62.191	0.736443	1.573				21.392	3.425	0.94004	1.03846			11.151	10.41	0.490014
			204.05	20.049	1.29561	1.10951			24.899	76.879	0.158096	4.25446			129.271	21.79	0.820804	1.20585				60.957	44.969	0.672621	1.1374			29.233	84.298	0.322567	2.13216			53.541	68.326	0.59079	1.72817				23.91	4.037	1.05069	1.22402			17.785	10.425	0.781535
			159.713	18.164	1.01409	1.00519			41.787	142.018	0.265326	7.85924			113.921	20.778	0.723339	1.14985				50.65	42.21	0.55889	1.06762			31.641	157.34	0.349138	3.97961			64.176	95.107	0.70814	2.40555				38.624	4.608	1.69727	1.39715			16.379	10.473	0.719751
			197.922	20.204	1.2567	1.11808			40.41	174.923	0.256583	9.68019			117.272	21.315	0.744617	1.17957				71.355	51.388	0.787356	1.29976			77.626	190.97	0.856552	4.83022			51.216	69.003	0.565135	1.7453				41.123	4.67	1.80709	1.41595			9.502	24.609	0.417551
			174.875	20.081	1.11037	1.11128			41.328	88.684	0.262411	4.90775			76.549	19.655	0.486047	1.0877				66.655	44.166	0.735495	1.11709			43.847	147.707	0.483823	3.73596			44.813	86.847	0.494482	2.19663				38.54	4.609	1.69358	1.39745			8.84	25.921	0.388461
			171.041	19.239	1.08602	1.06468			57.624	122.961	0.365883	6.80463			121.219	21.45	0.769678	1.18704				63.499	47.51	0.70067	1.20167			38.881	185.477	0.429027	4.69128			20.894	55.152	0.230552	1.39496				49.886	4.333	2.19217	1.31377			8.48	20.761	0.372641
			176.912	21.234	1.1233	1.17508			24.929	83.248	0.158286	4.60692			84.382	19.627	0.535782	1.08615				66.319	45.466	0.731787	1.14997			13.213	229.854	0.145797	5.81371			27.648	104.874	0.305078	2.65259				38.091	4.03	1.67385	1.2219			7.915	21.667	0.347813
			167.077	17.894	1.06085	0.990249			23.648	66.666	0.150153	3.68928			112.044	19.043	0.711421	1.05383				57.445	39.172	0.633868	0.99078			19.536	167.914	0.215567	4.24706			13.482	34.647	0.148765	0.876329				44.676	4.073	1.96322	1.23494			7.951	33.513	0.349395
			186.922	19.1	1.18686	1.05699			40.497	117.214	0.257135	6.48659			132.291	21.928	0.839979	1.21349				25.305	25.257	0.279224	0.638827			25.091	46.745	0.276863	1.18232			42.962	68.7	0.474058	1.73763				33.767	3.787	1.48384	1.14822			9.109	26.385	0.400281
			197.943	19.384	1.25684	1.07271			37.913	115.667	0.240728	6.40098			113.177	18.583	0.718615	1.02838				78.069	54.421	0.861441	1.37647			31.971	193.015	0.352779	4.88194			95.662	64.891	1.05557	1.64129				48.866	4.789	2.14734	1.45203			5.934	26.591	0.260761
			171.067	19.14	1.08619	1.0592			31.678	90.893	0.201139	5.02999			91.754	18.642	0.58259	1.03164				54.182	44.509	0.597863	1.12577			29.059	56.128	0.320647	1.41965			29.825	39.283	0.329099	0.993588				46.752	4.865	2.05445	1.47507			6.932	22.453	0.304616
			191.032	20.382	1.21295	1.12793			14.021	70.463	0.0890261	3.8994			17.293	11.908	0.109802	0.658985				50.13	38.554	0.553152	0.975149			14.542	215.37	0.160462	5.44737			25.341	71.876	0.279621	1.81796				47.077	4.902	2.06873	1.48629			6.629	17.245	0.291302
			145.374	19.086	0.92305	1.05621			43.127	119.664	0.273834	6.62217			84.402	27.307	0.535909	1.51116				54.118	45.68	0.597157	1.15539			14.946	155.524	0.164919	3.93368			36.216	91.034	0.39962	2.30253				41.649	5.276	1.8302	1.59969			7.924	17.639	0.348208
			174.177	18.133	1.10593	1.00348			36.028	124.967	0.228759	6.91564			81.382	18.894	0.516734	1.04559				57.787	48.317	0.637642	1.22209			29.675	138.563	0.327444	3.50468			25.439	69.134	0.280703	1.74861				45.595	5.38	2.0036	1.63122			7.195	15.696	0.316174
			174.992	18.135	1.11111	1.00359			27.266	103.9	0.173125	5.7498			97.213	19.75	0.617252	1.09296				25.812	29.259	0.284819	0.74005			27.795	183.609	0.3067	4.64404			27.194	77.213	0.300068	1.95295				49.123	4.77	2.15864	1.44627			5.778	23.854	0.253906
			144.723	19.93	0.918916	1.10292			11.767	51.333	0.0747144	2.84075			138.125	20.94	0.877022	1.15881				64.08	45.582	0.707081	1.15291			24.012	56.394	0.264957	1.42638			38.507	41.743	0.4249	1.05581				38.356	4.078	1.6855	1.23645			1.407	6.548	0.0618285
			174.619	20.056	1.10874	1.10989			29.481	113.154	0.187189	6.26191			179.253	21.327	1.13816	1.18023				54.931	37.995	0.606128	0.96101			21.497	88.455	0.237205	2.2373			26.193	58.183	0.289023	1.47163				44.73	5.844	1.96559	1.77191			1.578	6.559	0.0693429
			11.357	8.92	0.0721111	0.49363			49.141	131.772	0.31202	7.29223			158.344	20.48	1.0054	1.13336				56.75	38.479	0.626199	0.973252			15.135	169.857	0.167005	4.29621			68.503	57.939	0.755886	1.46546				51.049	4.237	2.24327	1.28466			12.621	16.679	0.554611
			16.254	10.379	0.103204	0.574371			48.682	122.335	0.309106	6.76998			93.216	17.887	0.591873	0.989862				55.913	42.276	0.616964	1.06929			13.709	215.85	0.15127	5.45951			44.089	64.368	0.486493	1.62806				43.986	4.991	1.9329	1.51328			3.84	14.124	0.168743
			167.575	18.825	1.06401	1.04177			42.414	129.089	0.269307	7.14375			133.67	19.947	0.848735	1.10386				22.155	25.185	0.244466	0.637006			12.732	224.734	0.140489	5.68421			22.388	54.857	0.247037	1.3875				43.687	4.39	1.91976	1.33105			6.701	17.843	0.294465
			150.642	20.036	0.956499	1.10879			10.721	52.163	0.0680728	2.88669			82.491	18.592	0.523775	1.02888				83.905	47.142	0.925837	1.19237			12.022	193.606	0.132655	4.89689			43.081	98.995	0.475371	2.50389				46.7	5.357	2.05216	1.62425			6.017	26.035	0.264408
			180.536	18.057	1.14631	0.999269			14.621	74.679	0.0928358	4.13271			7.161	16.911	0.0454686	0.93585				54.242	40.197	0.598525	1.01671			13.32	126.727	0.146978	3.20532			29.403	72.541	0.324443	1.83478				47.024	4.843	2.0664	1.4684			4.387	24.415	0.19278
			150.655	18.299	0.956581	1.01266			42.919	127.5	0.272513	7.05581			71.006	19.245	0.450851	1.06501				52.778	46.959	0.582371	1.18774			14.447	208.783	0.159413	5.28076			71.915	55.98	0.793535	1.41591				40.412	3.993	1.77585	1.21068			5.576	19.735	0.245029
			176.218	21.108	1.11889	1.16811			68.837	148.961	0.437079	8.24346			74.922	20.011	0.475716	1.1074				54.084	40.278	0.596782	1.01875			21.345	82.281	0.235528	2.08114			45.255	64.313	0.499359	1.62667				45.492	5.077	1.99908	1.53935			4.442	23.208	0.195197
			156.503	18.635	0.993713	1.03126			84.525	159.387	0.53669	8.82043			90.936	17.829	0.577397	0.986652				49.128	43.586	0.542096	1.10242			19.068	146.317	0.210403	3.70081			39.065	84.315	0.431057	2.13259				49.039	4.854	2.15495	1.47174			4.833	21.819	0.212379
			174.568	19.998	1.10842	1.10668			76.561	178.837	0.486123	9.89679			7.881	11.198	0.0500403	0.619694				54.664	42.322	0.603182	1.07045			23.032	77.742	0.254143	1.96633			25.789	105.285	0.284565	2.66298				42.454	4.118	1.86558	1.24858			1.52	15.307	0.0667941
			157.079	19.601	0.99737	1.08471			45.977	135.527	0.29193	7.50003			112.321	17.233	0.71318	0.953669				52.329	38.491	0.577416	0.973556			21.652	75.923	0.238916	1.92033			21.335	64	0.235418	1.61876				48.902	4.714	2.14893	1.42929			4.784	11.553	0.210226
			154.556	20.53	0.981351	1.13612			49.962	151.363	0.317233	8.37639			142.728	18.707	0.906249	1.03524				54.843	38.937	0.605157	0.984836			15.287	145.019	0.168682	3.66798			82.78	55.802	0.913423	1.4114				43.915	4.349	1.92978	1.31862			3.286	28.055	0.144398
			153.684	17.445	0.975814	0.965401			62.584	92.715	0.397376	5.13082			110.864	20.29	0.703929	1.12284				54.179	38.091	0.59783	0.963438			14.33	132.54	0.158122	3.35234			27.57	80.801	0.304217	2.04371				44.833	4.544	1.97012	1.37775			6.495	16.012	0.285413
			167.089	19.962	1.06093	1.10469			42.599	165.554	0.270482	9.16171			121.565	18.347	0.771875	1.01532				50.686	37.546	0.559287	0.949654			14.523	151.229	0.160252	3.82505			25.39	74.495	0.280162	1.88421				45.148	4.587	1.98396	1.39078			5.075	18.815	0.223013
			159.881	18.107	1.01516	1.00204			33.167	147.19	0.210593	8.14545			106.813	16.157	0.678207	0.894124				59.454	40.381	0.656036	1.02136			12.092	208.724	0.133427	5.27927			47.636	54.453	0.525632	1.37728				41.775	4.71	1.83574	1.42808			4.938	8.93	0.216993
			179.735	19.583	1.14122	1.08372			32.079	129.491	0.203685	7.166			130.539	18.326	0.828855	1.01416				75.774	42.897	0.836117	1.085			16.337	189.877	0.180268	4.80257			34.127	72.297	0.376569	1.82861				48.398	5.021	2.12678	1.52237			4.509	10.573	0.198141
			155.012	17.201	0.984246	0.951899			53.005	100.232	0.336554	5.54681			143.574	17.879	0.911621	0.989419				80.666	54.712	0.890097	1.38383			18.787	129.217	0.207302	3.26829			26.782	85.271	0.295522	2.15677				37.124	4.059	1.63136	1.23069			4.349	17.079	0.19111
			176.951	17.43	1.12355	0.964571			3.047	14	0.0193469	0.774756			93.031	18.667	0.590699	1.03303				66.774	41.539	0.736808	1.05065			23.907	178.666	0.263798	4.51901			47.161	70.416	0.520391	1.78104				40.325	4.133	1.77202	1.25313			4.908	15.804	0.215675
			194.01	18.383	1.23186	1.01731			60.509	110.199	0.384201	6.09838			162.852	17.576	1.03403	0.972651				56.31	43.066	0.621344	1.08927			17.917	168.378	0.197702	4.2588			45.32	106.181	0.500077	2.68564				42.532	3.818	1.86901	1.15762			4.161	15.981	0.182849
			184.025	19.792	1.16846	1.09528			36.927	101.553	0.234467	5.61991			109.101	18.411	0.692735	1.01886				62.799	41.715	0.692946	1.0551			24.059	182.792	0.265475	4.62337			25.45	58.97	0.280824	1.49153				37.57	4.247	1.65096	1.2877			5.339	22.293	0.234614
			167.959	19.496	1.06645	1.0789			47.953	113.253	0.304477	6.26739			91.584	17.193	0.581511	0.951456				61.408	38.782	0.677597	0.980916			23.933	190.378	0.264085	4.81524			26.704	66.596	0.294661	1.68442				42.29	4.068	1.85837	1.23342			8.538	10.881	0.37519
			157.155	16.805	0.997853	0.929984			44.655	126.157	0.283536	6.98149			163.034	17.102	1.03518	0.94642				56.157	43.081	0.619656	1.08965			16.972	166.376	0.187275	4.20816			65.329	59.661	0.720863	1.50901				51.434	4.864	2.26019	1.47477			3.629	18.28	0.159471
			142.547	17.614	0.9051	0.974754			76.377	153.713	0.484954	8.50643			93.948	17.645	0.596521	0.976469				51.575	45.785	0.569097	1.15804			19.938	125.797	0.220003	3.18179			39.927	54.453	0.440568	1.37728				39.076	4.272	1.71714	1.29528			4.557	15.71	0.200251
			162.828	18.732	1.03387	1.03662			55.444	117.049	0.352041	6.47746			138.863	20.223	0.881708	1.11914				65.553	44.212	0.723335	1.11826			22.937	186.174	0.253095	4.70891			65.548	57.189	0.72328	1.44649				49.105	5.071	2.15785	1.53753			5.739	12.356	0.252192
			148.297	18.595	0.941609	1.02904			50.689	79.742	0.321849	4.4129			99.985	20.363	0.634853	1.12688				63.682	46.046	0.702689	1.16464			20.634	170.058	0.227683	4.30129			37.875	74.093	0.417926	1.87404				29.575	3.225	1.29963	0.977824			2.449	10.224	0.107618
			147.84	19.727	0.938708	1.09169			69.453	77.319	0.440991	4.27881			104.469	20.075	0.663324	1.11094				59.437	41.423	0.655849	1.04771			24.54	195.568	0.270783	4.94652			21.401	65.129	0.236146	1.64731				46.741	4.931	2.05396	1.49509			3.348	18.359	0.147123
			88.243	15.037	0.560297	0.832143			67.239	101.672	0.426933	5.6265			108.035	18.817	0.685966	1.04133				62.061	46.521	0.684803	1.17666			28.732	126.572	0.317039	3.20139			36.702	70.108	0.404983	1.77325				44.999	4.85	1.97741	1.47053			4.415	15.87	0.194011
			184.315	19.573	1.1703	1.08316			10.404	46.981	0.06606	2.59992			140.202	17.46	0.89021	0.966232				54.799	44.973	0.604671	1.13751			22.39	162.234	0.247059	4.1034			24.074	69.723	0.265641	1.76351				39.061	4.342	1.71648	1.3165			3.886	17.537	0.170764
			135.8	18.299	0.86226	1.01266			75.678	90.25	0.480516	4.99441			74.342	19.701	0.472033	1.09025				67.47	46.474	0.744488	1.17547			19.111	201.682	0.210877	5.10116			39.278	80.673	0.433407	2.04047				52.307	5.7	2.29855	1.72825			4.984	13.35	0.219014
			153.18	16.099	0.972614	0.890914			59.756	105.889	0.37942	5.85987			90.511	20.395	0.574698	1.12865				57.479	43.497	0.634243	1.10017			19.569	199.011	0.215931	5.0336			36.051	88.76	0.397799	2.24501				66.684	4.997	2.93033	1.5151			3.142	28.689	0.138071
			148.63	16.604	0.943724	0.918861			49.111	118.108	0.311829	6.53606			136.797	20.114	0.86859	1.1131				62.575	44.639	0.690474	1.12906			19.823	157.929	0.218734	3.99451			40.265	83.793	0.444298	2.11938				36.103	4.159	1.58649	1.26101			3.369	15.509	0.148046
			156.214	18.636	0.991878	1.03131			31.252	105.715	0.198434	5.85024			127.314	21.336	0.808378	1.18073				51.672	44.715	0.570167	1.13098			22.34	161.81	0.246507	4.09267			32.453	63.814	0.358098	1.61405				44.9	4.752	1.97306	1.44081			6.523	15.024	0.286644
			124.035	20.13	0.787558	1.11399			52.363	110.254	0.332478	6.10143			22.076	9.257	0.140171	0.51228				59.349	47.076	0.654878	1.1907			19.983	201.434	0.220499	5.09488			52.341	76.733	0.577549	1.94081				35.797	4.345	1.57305	1.31741			6.843	12.453	0.300705
			113.151	16.956	0.71845	0.93834			55.076	117.332	0.349704	6.49312			39.615	26.279	0.251535	1.45427				23.555	29.554	0.259914	0.747511			18.071	154.986	0.199402	3.92007			39.823	68.263	0.439421	1.72658				44.823	4.249	1.96968	1.2883			7.737	22.174	0.339991
			188.312	16.874	1.19568	0.933802			40.172	148.187	0.255071	8.20063			75.68	17.127	0.480529	0.947803				54.874	44.463	0.605499	1.12461			23.246	202.598	0.256504	5.12433			35.768	69.61	0.394677	1.76065				42.4	4.457	1.86321	1.35137			4.893	18.614	0.215016
			174.328	19.44	1.10689	1.0758			69.535	49.521	0.441511	2.74048			142.83	20.73	0.906897	1.14719				58.458	46.111	0.645046	1.16629			26.436	169.382	0.291704	4.28419			37.675	58.462	0.415719	1.47868				50.06	5.038	2.19981	1.52753			8.373	18.261	0.367939
			197.318	19.205	1.25287	1.0628			63.256	163.128	0.401643	9.02746			144.23	20.968	0.915786	1.16036				69.403	50.033	0.765817	1.26549			19.366	194.365	0.213691	4.91609			44.594	88.622	0.492066	2.24152				45.563	4.158	2.0022	1.26071			6.579	13.848	0.289104
			191.755	19.459	1.21755	1.07686			4.739	16.435	0.0300902	0.909508			18.624	14.842	0.118253	0.821352				49.709	49.26	0.548506	1.24594			26.275	159.224	0.289928	4.02726			34.988	56.547	0.38607	1.43025				34.961	3.827	1.53631	1.16035			3.368	8.418	0.148002
			180.629	18.215	1.1469	1.00801			5.486	11.16	0.0348333	0.617591			90.558	17.277	0.574996	0.956104				57.959	50.876	0.63954	1.28681			22.608	175.727	0.249465	4.44468			34.92	52.966	0.385319	1.33967				45.538	4.389	2.0011	1.33075			8.054	15.222	0.353921
			197.375	18.738	1.25323	1.03696			46.859	145.624	0.29753	8.05879			59.731	15.752	0.379261	0.871711				88.128	48.361	0.972435	1.2232			18.383	168.051	0.202844	4.25053			32.253	41.194	0.355891	1.04192				51.141	4.731	2.24732	1.43445			3.557	26.041	0.156307
			160.008	18.026	1.01597	0.997554			53.46	124.001	0.339443	6.86218			110.792	17.073	0.703472	0.944815				108.727	48.395	1.19973	1.22406			26.91	155.211	0.296934	3.92576			49.162	68.838	0.542471	1.74112				49.621	4.749	2.18052	1.4399			3.216	30.931	0.141322
			184.232	20.168	1.16978	1.11609			2.393	7.806	0.0151943	0.431982			52.508	12.409	0.333399	0.686711				106.644	44.647	1.17675	1.12926			20.455	64.061	0.225708	1.6203			36.708	69.812	0.405049	1.76576				43.829	5.482	1.926	1.66215			9.005	17.819	0.395711
			179.565	17.111	1.14014	0.946918			4.216	9.216	0.0267694	0.510011			86.375	19.711	0.548437	1.0908				101.715	48.362	1.12236	1.22322			58.784	171.698	0.648643	4.34277			36.757	76.31	0.40559	1.93011				38.284	5.319	1.68233	1.61273			5.048	19.403	0.221827
			175.441	16.409	1.11396	0.908069			71.991	51.415	0.457106	2.84529			77.544	15.136	0.492364	0.837622				81.503	44.985	0.899333	1.13781			19.269	59.331	0.212621	1.50066			23.168	53.524	0.255644	1.35379				44.818	4.882	1.96946	1.48023			11.111	11.813	0.488256
			185.626	18.159	1.17863	1.00491			40.147	135.026	0.254913	7.4723			75.192	19.273	0.47743	1.06656				93.528	49.441	1.03202	1.25051			29.526	178.541	0.3258	4.51585			46.468	67.633	0.512744	1.71065				41.268	4.179	1.81346	1.26708			16.463	9.783	0.723442
			189.472	18.835	1.20305	1.04232			60.556	132.31	0.384499	7.322			70.204	22.152	0.445759	1.22589				109.458	48.531	1.2078	1.2275			21.982	208.846	0.242557	5.28236			40.161	66.599	0.44315	1.68449				51.788	4.737	2.27575	1.43626			10.803	11.12	0.474722
			190.789	16.6	1.21141	0.918639			60.236	71.953	0.382467	3.98186			87.657	20.227	0.556577	1.11936				76.591	40.424	0.845132	1.02245			28.888	169.694	0.31876	4.29208			39.789	72.525	0.439046	1.83438				49.555	4.883	2.17762	1.48053			16.667	24.506	0.732407
			177.571	18.919	1.12748	1.04697			58.888	93.75	0.373908	5.1881			92.797	19.825	0.589213	1.09711				113.705	48.515	1.25466	1.22709			24.832	187.468	0.274005	4.74164			27.035	79.124	0.298314	2.00129				48.718	5.296	2.14084	1.60575			10.388	12.347	0.456485
			85.337	12.821	0.541846	0.709511			47.928	121.382	0.304318	6.71725			53.462	20.323	0.339456	1.12467				108.939	43.151	1.20207	1.09142			19.845	175.297	0.218977	4.4338			42.381	73.918	0.467647	1.86961				43.444	5.078	1.90908	1.53966			8.276	18.946	0.363677
			77.355	12.884	0.491164	0.712997			47.616	101.945	0.302337	5.64161			90.278	19.6	0.573219	1.08466				84.345	38.081	0.930692	0.963185			28.854	162.898	0.318385	4.12019			34.449	93.666	0.380122	2.3691				32.701	5.269	1.437	1.59757			5.511	13.063	0.242173
			163.405	18.887	1.03754	1.0452			61.939	140.665	0.393281	7.78436			120.454	19.7	0.764821	1.09019				96.763	38.074	1.06772	0.963008			22.767	66.416	0.251219	1.67986			67.355	45.166	0.743219	1.14239				48.841	4.821	2.14625	1.46173			6.998	13.861	0.307517
			161.167	15.459	1.02333	0.855497			59.342	139.43	0.376791	7.71602			111.4	17.6	0.707332	0.973979				91.41	42.385	1.00865	1.07205			66.187	178.233	0.73033	4.50806			82.427	54.179	0.909528	1.37035				23.56	4.337	1.03531	1.31498			2.345	3.279	0.103048
			172.668	19.255	1.09635	1.06557			49.059	157.148	0.311499	8.69653			119.742	19.512	0.7603	1.07979				104.601	46.935	1.1542	1.18713			20.201	59.734	0.222905	1.51086			83.951	47.393	0.926345	1.19871				17.776	3.761	0.78114	1.14034			8.419	14.143	0.36996
			168.121	16.887	1.06748	0.934522			56.406	78.352	0.358149	4.33598			124.553	19.002	0.790847	1.05157				112.972	46.449	1.24657	1.17484			41.645	146.959	0.459525	3.71704			45.471	63.886	0.501743	1.61587				15.961	3.714	0.701382	1.12609			0.579	0.761	0.0254433
			169.31	16.904	1.07503	0.935463			62.675	148.271	0.397954	8.20528			111.596	20.199	0.708577	1.11781				96.869	44.875	1.06889	1.13503			25.5	130.792	0.281376	3.30813			45.18	76.072	0.498532	1.92409				19.017	4.378	0.835674	1.32742			5.74	16.86	0.252236
			169.336	19.244	1.0752	1.06496			44.999	141.179	0.28572	7.81281			138.514	18.168	0.879492	1.00541				99.775	43.041	1.10095	1.08864			31.401	146.135	0.34649	3.6962			24.315	64.672	0.2683	1.63575				20.885	3.569	0.91776	1.08213			5.516	12.469	0.242392
			188.057	18.728	1.19406	1.0364			65.386	81.568	0.415167	4.51395			105.527	22.254	0.670042	1.23153				106.249	51.929	1.17239	1.31344			31.114	147.878	0.343323	3.74029			77.073	72.54	0.85045	1.83476				7.474	2.361	0.328434	0.715858			7.04	14.613	0.309362
			165.328	17.978	1.04975	0.994897			2.388	14.746	0.0151626	0.81604			105.529	19.854	0.670055	1.09871				98.839	48.375	1.09062	1.22355			45.025	148.808	0.496822	3.76381			46.706	96.306	0.51537	2.43587				2.552	1.77	0.112144	0.536666			7.085	13.366	0.31134
			93.474	14.965	0.593512	0.828159			74.867	97.831	0.475367	5.41394			72.057	14.988	0.457525	0.829432				92.388	40.102	1.01944	1.0143			20.875	162.992	0.230342	4.12257			92.558	93.003	1.02132	2.35233				18.735	3.525	0.823282	1.06878			4.335	12.678	0.190495
			157.64	18.456	1.00093	1.02135			41.949	132.404	0.266354	7.3272			82.671	19.869	0.524918	1.09954				83.114	38.698	0.917109	0.978791			46.927	130.857	0.517809	3.30978			85.167	85.476	0.939762	2.16195				10.652	2.769	0.468086	0.839564			4.419	17.382	0.194186
			83.034	12.848	0.527223	0.711005			71.411	89.539	0.453423	4.95506			73.85	18.513	0.468909	1.0245				100.995	44.214	1.11441	1.11831			43.325	144.79	0.478063	3.66218			40.692	108.582	0.44901	2.74637				16.17	3.313	0.710567	1.00451			3.477	16.181	0.152792
			181.447	18.718	1.15209	1.03585			84.814	95.185	0.538525	5.26751			42.37	12.855	0.269028	0.711392				94.909	39.441	1.04726	0.997584			37.06	145.068	0.408933	3.66922			43.835	43.099	0.483691	1.09011				15.32	3.119	0.673215	0.945685			5.213	14.068	0.229078
			162.689	17.416	1.03299	0.963797			101.398	78.108	0.643825	4.32247			119.429	17.667	0.758312	0.977687				106.116	47.993	1.17092	1.21389			64.18	170.338	0.708185	4.30837			73.425	127.959	0.810197	3.23648				20.156	4.251	0.885725	1.28891			4.875	11.587	0.214225
			87.396	12.375	0.554919	0.684829			83.847	55.011	0.532385	3.04429			52.491	14.155	0.333291	0.783334				99.478	45.588	1.09767	1.15306			44.813	96.183	0.494482	2.43276			56.767	80.437	0.626387	2.0345				14.758	3.059	0.648518	0.927493			8.034	11.482	0.353042
			172.246	17.407	1.09367	0.963298			77.328	49.759	0.490993	2.75365			52.417	12.582	0.332821	0.696284				102.892	45.447	1.13535	1.14949			40.683	157.374	0.44891	3.98047			51.289	69.957	0.565941	1.76943				13.755	2.633	0.604443	0.798329			7.823	13.506	0.34377
			193.648	18.789	1.22956	1.03978			86.504	49.036	0.549256	2.71364			48.483	10.538	0.307842	0.58317				80.987	44.179	0.893639	1.11742			49.121	112.984	0.542018	2.85771			90.705	85.962	1.00087	2.17424				14.067	2.809	0.618153	0.851692			8.572	12.437	0.376684
			142.727	17.189	0.906243	0.951234			124.309	98.5	0.789298	5.45096			77.196	14.698	0.490155	0.813383				99.681	48.15	1.09991	1.21786			34.01	120.798	0.375278	3.05535			57.883	86.722	0.638701	2.19347				17.458	3.334	0.767166	1.01087			11.654	8.608	0.512118
			148.626	17.735	0.943698	0.98145			5.817	8.26	0.0369349	0.457106			43.465	10.911	0.27598	0.603812				98.303	37.326	1.08471	0.944089			37.28	104.325	0.411361	2.6387			62.138	76.374	0.685652	1.93173				16.819	3.317	0.739086	1.00572			3.309	8.074	0.145409
			126.507	16.902	0.803254	0.935352			101.82	84.572	0.646504	4.68019			100.114	19.937	0.635672	1.10331				92.341	42.362	1.01892	1.07147			17.509	191.934	0.1932	4.8546			52.204	64.625	0.576037	1.63456				7.202	1.898	0.316481	0.575476			4.143	12.467	0.182058
			185.476	17.118	1.17768	0.947305			37.953	129.515	0.240982	7.16732			37.392	9.52	0.23742	0.526834				92.79	38.859	1.02388	0.982863			20.262	204.582	0.223578	5.17451			67.269	112.136	0.74227	2.83626				17.631	3.464	0.774768	1.05029			8.038	13.884	0.353218
			193.774	19.225	1.23036	1.06391			140.83	109.126	0.894198	6.039			82.321	15.076	0.522696	0.834302				98.541	46.676	1.08734	1.18058			33.327	110.194	0.367742	2.78714			41.335	100.265	0.456105	2.53601				12.782	2.593	0.561686	0.786201			6.027	10.403	0.264848
			162.771	19.159	1.03351	1.06025			80.72	44.373	0.51253	2.45559			111.921	20.781	0.71064	1.15001				99.467	42.956	1.09755	1.08649			22.731	40.347	0.250822	1.0205			66.338	122.725	0.731997	3.10409				10.422	2.551	0.457979	0.773466			4.074	18.02	0.179026
			177.402	20.056	1.12641	1.10989			99.5	118.358	0.631774	6.5499			90.805	20.375	0.576565	1.12755				106.271	49.452	1.17263	1.25079			28.005	116.909	0.309017	2.95699			67.501	96.213	0.74483	2.43352				19.797	4.409	0.86995	1.33681			4.582	12.926	0.201349
			162.783	19.842	1.03359	1.09805			73.051	118.201	0.463836	6.54121			74.516	19.949	0.473138	1.10397				96.516	45.171	1.06499	1.14251			29.964	89.489	0.330633	2.26345			66.738	47.446	0.73641	1.20006				6.265	1.778	0.275306	0.539092			2.445	13.251	0.107442
			178.454	16.756	1.13309	0.927272			54.211	145.8	0.344212	8.06853			76.912	14.85	0.488351	0.821795				99.645	42.185	1.09952	1.06699			44.858	116.054	0.494979	2.93536			63.344	52.193	0.69896	1.32012				6.813	1.696	0.299387	0.514229			4.35	12.788	0.191154
			172.1	18.535	1.09275	1.02572			80.526	111.233	0.511298	6.1556			85.342	16.587	0.541878	0.91792				96.515	40.279	1.06498	1.01878			37.961	116.875	0.418875	2.95613			58.809	62.826	0.648919	1.58906				16.012	3.638	0.703624	1.10305			1.805	3.035	0.079318
			155.557	17.064	0.987707	0.944317			91.098	120.126	0.578425	6.64774			123.588	20.934	0.78472	1.15848				113.457	51.829	1.25192	1.31091			48.96	125.418	0.540242	3.17221			69.221	118.142	0.763809	2.98817				16.37	3.525	0.719355	1.06878			4.296	10.65	0.188781
			181.661	18.686	1.15345	1.03408			59.894	126.887	0.380296	7.02189			95.825	18.933	0.608439	1.04775				95.686	48.079	1.05583	1.21607			22.144	94.427	0.244345	2.38835			41.313	84.505	0.455862	2.13739				13.424	2.891	0.589898	0.876555			1.451	6.936	0.063762
			158.921	18.033	1.00907	0.997941			79.994	36.684	0.507921	2.03008			81.881	17.995	0.519902	0.995838				91.859	42.078	1.0136	1.06428			48.107	124.966	0.530829	3.16077			59.871	69.479	0.660638	1.75734				16.03	1.887	0.704415	0.572141			3.813	2.53	0.167557
			194.523	20.075	1.23512	1.11094			61.97	177.668	0.393477	9.8321			109.661	19.222	0.696291	1.06374				84.153	37.989	0.928574	0.960859			36.016	142.314	0.397413	3.59956			48.616	54.873	0.536446	1.38791				5.395	1.704	0.237075	0.516655			7.959	14.964	0.349746
			144.492	18.352	0.917449	1.01559			72.58	119.078	0.460845	6.58974			99.64	22.664	0.632662	1.25422				83.632	46.19	0.922825	1.16829			19.723	159.197	0.21763	4.02658			52.916	64.548	0.583894	1.63262				6.615	2.537	0.290686	0.769222			3.415	5.486	0.150067
			183.005	17.988	1.16199	0.995451			77.526	129.541	0.49225	7.16876			130.936	20.767	0.831376	1.14924				99.431	43.968	1.09716	1.11209			32.033	116.722	0.353463	2.95226			33.441	58.336	0.369	1.4755				16.338	3.135	0.717949	0.950536			5.232	14.357	0.229912
			159.252	16.833	1.01117	0.931533			72.853	34.8	0.462579	1.92582			90.411	19.46	0.574063	1.07691				89.453	40.868	0.987056	1.03368			41.038	212.5	0.452828	5.37478			67.161	73.955	0.741078	1.87055				15.874	3.075	0.697559	0.932344			8.929	13.538	0.392372
			150.699	18.093	0.956861	1.00126			81.243	147.043	0.515851	8.13732			125.705	21.035	0.798162	1.16407				106.802	44.613	1.17849	1.1284			23.534	71.676	0.259682	1.81291			51.711	86.709	0.570597	2.19314				17.135	3.268	0.752972	0.990862			3.878	21.359	0.170413
			155.698	19.44	0.988602	1.0758			79.068	130.599	0.502041	7.22731			139.089	20.794	0.883143	1.15073				106.409	44.857	1.17415	1.13457			48.378	143.054	0.53382	3.61828			51.66	81.84	0.570034	2.06999				14.841	2.801	0.652166	0.849267			6.299	18.044	0.2768
			165.987	18.139	1.05393	1.00381			61.811	113.68	0.392468	6.29102			154.048	21.715	0.978125	1.2017				99.231	49.125	1.09495	1.24252			25.1	77.731	0.276962	1.96606			66.222	66.748	0.730717	1.68826				19.472	3.629	0.855668	1.10032			6.471	7.191	0.284358
			119.003	13.463	0.755608	0.745039			88.7	108.174	0.563199	5.98632			116.19	20.024	0.737746	1.10812				100.802	41.6	1.11228	1.05219			52.015	191.563	0.573952	4.84522			14.109	149.216	0.155684	3.77413				17.654	3.546	0.775779	1.07515			3.651	14.433	0.160438
			182.368	19.025	1.15794	1.05284			115.791	115.552	0.735213	6.39462			160.769	18.628	1.0208	1.03087				89.772	40.391	0.990576	1.02161			70.428	167.925	0.777127	4.24734			46.423	78.398	0.512248	1.98293				14.168	3.182	0.622592	0.964786			5.114	2.538	0.224727
			161.607	18.317	1.02612	1.01366			150.811	140.009	0.957572	7.74806			143.876	19.819	0.913538	1.09678				86.465	39.161	0.954085	0.990502			32.437	112.493	0.357921	2.84529			74.674	73.01	0.823979	1.84665				15.887	3.224	0.698131	0.977521			1.125	1.935	0.0494365
			155.552	19.919	0.987675	1.10231			130.054	146.139	0.825776	8.08729			119.302	18.803	0.757506	1.04055				99.038	42.996	1.09282	1.0875			29.184	84.107	0.322026	2.12732			27.327	64.983	0.301536	1.64362				6.199	2.771	0.272406	0.840171			5.185	16.213	0.227847
			161.391	17.037	1.02475	0.942823			115.254	181.44	0.731803	10.0408			137.655	19.676	0.874038	1.08886				97.462	36.847	1.07543	0.931974			67.786	155.241	0.747974	3.92652			66.548	64.421	0.734314	1.6294				13.47	3.794	0.591919	1.15035			1.02	1.365	0.0448224
			101.559	14.234	0.644847	0.787706			132.838	160.286	0.843453	8.87018			139.142	19.579	0.88348	1.0835				40.018	17.46	0.441573	0.441617			119.653	120.522	1.32029	3.04837			46.273	120.309	0.510592	3.04298				31.599	5.249	1.38857	1.5915			2.182	15.462	0.0958847
			99.411	14.022	0.631208	0.775974			82.694	163.085	0.525064	9.02508			135.414	18.19	0.859809	1.00663				81.977	39.925	0.904563	1.00983			29.271	90.297	0.322986	2.28389			44.155	50.717	0.487222	1.28279				33.07	4.774	1.45321	1.44748			5.938	9.689	0.260937
			164.316	18.066	1.04332	0.999767			90.276	95.667	0.573206	5.29418			123.226	17.882	0.782421	0.989585				43.129	20.088	0.4759	0.508087			21.625	84.275	0.238618	2.13157			44.786	71.365	0.494184	1.80504				34.184	4.701	1.50217	1.42535			11.392	7.253	0.500605
			158.857	18.531	1.00866	1.0255			85.762	130.336	0.544544	7.21276			113.459	20.502	0.720406	1.13457				106.025	42.488	1.16992	1.07465			32.988	81.164	0.364001	2.05289			34.081	65.264	0.376062	1.65073				33.382	5.249	1.46692	1.5915			6.223	8.554	0.27346
			158.684	16.859	1.00756	0.932972			8.217	9.47	0.0521737	0.524067			7.305	14.062	0.046383	0.778187				82.494	35.267	0.910268	0.892011			37.413	141.24	0.412828	3.57239			61.448	78.722	0.678039	1.99112				32.358	4.088	1.42192	1.23949			1.596	2.694	0.0701338
			160.459	18.611	1.01883	1.02993			50.482	137.574	0.320535	7.61331			122.681	21.848	0.778961	1.20906				89.322	39.874	0.98561	1.00854			28.978	76.008	0.319753	1.92248			47.425	50.617	0.523304	1.28026				29.587	4.79	1.30016	1.45233			4.943	8.34	0.217213
			153.731	18.514	0.976112	1.02456			100.86	194.667	0.640409	10.7728			138.26	20.926	0.87788	1.15804				85.783	39.172	0.94656	0.99078			24.942	93.461	0.275219	2.36392			56.781	35.557	0.626541	0.899346				35.349	5.142	1.55336	1.55906			3.792	5.561	0.166634
			172.269	17.747	1.09382	0.982114			105.292	178.238	0.66855	9.86364			117.388	18.393	0.745353	1.01786				89.331	40.579	0.985709	1.02637			60.059	123.97	0.662712	3.13558			28.021	37.377	0.309193	0.945379				30.58	3.888	1.34379	1.17885			4.196	7.164	0.184387
			145.847	16.336	0.926053	0.90403			45.031	197.047	0.285924	10.9045			8.337	11.866	0.0529356	0.656661				84.152	38.4	0.928563	0.971254			41.105	121.056	0.453567	3.06188			53.757	61.281	0.593174	1.54998				24.906	4.015	1.09446	1.21735			7.122	7.32	0.312966
			155.536	17.459	0.987573	0.966176			101.024	183.47	0.64145	10.1532			50.383	17.799	0.319906	0.984992				110.907	42.634	1.22379	1.07834			37.314	113.129	0.411736	2.86138			51	65.023	0.562752	1.64463				26.065	4.065	1.14539	1.23251			6.285	7.916	0.276185
			112.161	14.52	0.712164	0.803533			97.943	149.547	0.621887	8.27589			114.127	19.662	0.724647	1.08809				90.076	38.668	0.99393	0.978033			42.224	115.116	0.465914	2.91164			30.986	88.045	0.34191	2.22693				29.06	3.975	1.277	1.20523			4.567	6.593	0.20069
			155.832	17.543	0.989453	0.970825			95.153	75.816	0.604172	4.19564			126.549	20.792	0.803521	1.15062				98.745	47.543	1.08959	1.20251			57.875	84.661	0.638613	2.14134			63.415	77.756	0.699743	1.96669				27.497	3.847	1.20831	1.16642			5.612	8.819	0.246611
			153.482	15.985	0.974531	0.884605			131.074	115.689	0.832252	6.4022			100.52	16.919	0.63825	0.936293				85.229	36.984	0.940447	0.935439			21.614	94.514	0.238496	2.39055			41.146	69.669	0.454019	1.76214				27.834	3.8	1.22312	1.15216			7.161	7.432	0.31468
			157.803	16.949	1.00197	0.937953			101.526	210.602	0.644638	11.6547			118.894	17.831	0.754915	0.986763				121.038	57.864	1.33558	1.46356			35.98	116.237	0.397016	2.93999			65.146	65.469	0.718844	1.65591				34.552	5.825	1.51834	1.76615			5.122	7.417	0.225079
			135.66	18.362	0.861371	1.01615			72.684	159.386	0.461506	8.82038			100.624	21.452	0.63891	1.18715				128.865	58.016	1.42194	1.4674			88.942	130.004	0.981417	3.2882			55.864	65.059	0.616423	1.64554				28.539	4.338	1.2541	1.31529			5.252	10.751	0.230791
			106.927	14.26	0.678931	0.789144			6.172	19.312	0.039189	1.06872			149.568	18.238	0.949679	1.00929				98.7	48.211	1.08909	1.2194			108.259	128.973	1.19457	3.26212			31.235	41.77	0.344658	1.05649				30.007	4.044	1.31861	1.22615			7.725	7.898	0.339464
			166.299	18.609	1.05591	1.02982			2.489	16.128	0.0158039	0.892519			112.691	21.911	0.71553	1.21255				133.537	51.698	1.47349	1.3076			21.88	132.584	0.241432	3.35346			43.315	91.654	0.477953	2.31821				27.257	3.573	1.19777	1.08334			5.923	11.9	0.260277
			169.781	18.947	1.07802	1.04852			130.887	164.043	0.831065	9.07809			124.946	18.056	0.793343	0.999214				145.002	64.423	1.6	1.62946			40.008	149.763	0.441462	3.78797			34.175	68.625	0.377099	1.73574				25.1	3.603	1.10298	1.09243			6.763	11.344	0.29719
			102.212	14.155	0.648993	0.783334			104.872	90.29	0.665883	4.99662			113.42	18.849	0.720158	1.0431				107.752	56.811	1.18897	1.43692			25.976	145.787	0.286628	3.6874			36.995	54.385	0.408216	1.37556				24.628	3.543	1.08224	1.07424			3.407	7.9	0.149716
			138.407	17.948	0.878813	0.993237			75.266	200.436	0.4779	11.0921			127.669	18.735	0.810632	1.03679				99.387	49.405	1.09667	1.2496			82.782	132.424	0.913445	3.34941			43.016	83.378	0.474654	2.10889				20.246	3.563	0.88968	1.08031			2.833	7.715	0.124492
			118.511	19.873	0.752484	1.09977			98.085	95.551	0.622789	5.28777			130.007	21.18	0.825477	1.1721				113.312	52.024	1.25032	1.31585			43.792	112.843	0.483216	2.85415			56.816	55.683	0.626928	1.40839				18.089	3.081	0.794894	0.934163			5.123	9.88	0.225123
			16.796	8.384	0.106646	0.463968			86.018	88.764	0.54617	4.91217			144.362	18.851	0.916624	1.04321				115.821	50.422	1.27801	1.27533			44.167	152.15	0.487354	3.84834			29.644	49.772	0.327102	1.25889				30.429	4.82	1.33716	1.46143			3.85	16.483	0.169183
			147.611	17.037	0.937254	0.942823			118.446	144.073	0.752071	7.97296			129.602	18.587	0.822906	1.0286				111.361	53.01	1.2288	1.34079			97.519	116.276	1.07606	2.94098			50.377	66.779	0.555877	1.68905				28.67	3.466	1.25986	1.0509			4.139	13.676	0.181882
			163.423	18.977	1.03765	1.05018			170.889	134.334	1.08506	7.43401			144.91	17.802	0.920104	0.985158				45.41	31.698	0.50107	0.80174			36.149	169.016	0.398881	4.27493			90.082	56.965	0.993996	1.44082				31.561	4.462	1.3869	1.35288			2.893	18.947	0.127129
			181.283	18.724	1.15105	1.03618			79.161	89.322	0.502631	4.94305			120.087	17.492	0.76249	0.968002				60.562	37.818	0.668262	0.956533			37.798	117.687	0.417076	2.97667			61.73	90.137	0.68115	2.27984				26.399	3.818	1.16006	1.15762			3.541	7.025	0.155604
			127.001	15.574	0.806391	0.861861			12.037	8.877	0.0764287	0.491251			120.981	18.887	0.768167	1.0452				105.413	47.804	1.16316	1.20911			21.107	97.23	0.232902	2.45925			59.486	54.241	0.656389	1.37192				28.378	3.62	1.24703	1.09759			3.509	17.343	0.154198
			131.518	16.724	0.835071	0.925501			39.1	176.311	0.248265	9.757			138.141	19.827	0.877124	1.09722				114.366	50.707	1.26195	1.28254			27.422	186.185	0.302584	4.70919			69.896	50.09	0.771257	1.26693				26.817	4.161	1.17843	1.26162			2.504	16.534	0.110035
			145.677	17.714	0.924974	0.980288			83.872	203.066	0.532544	11.2376			126.718	20.815	0.804594	1.1519				107.989	47.938	1.19159	1.2125			27.183	111.021	0.299947	2.80806			67.298	113.106	0.74259	2.8608				23.813	3.669	1.04643	1.11245			2.236	16.254	0.0982577
			142.567	15.399	0.905227	0.852176			80.425	179.247	0.510657	9.91948			104.815	17.369	0.665521	0.961196				122.686	54.037	1.35376	1.36676			89.011	107.871	0.982178	2.72839			62.559	39.411	0.690298	0.996825				26.93	3.917	1.1834	1.18764			0.907	2.237	0.0398568
			145.682	16.847	0.925005	0.932308			97.156	184.68	0.61689	10.2201			91.324	18.018	0.57986	0.997111				115.198	42.464	1.27113	1.07405			41.152	108.076	0.454086	2.73357			75.196	88.876	0.829739	2.24795				26.487	3.669	1.16393	1.11245			1.901	3.88	0.0835366
			185.312	19.907	1.17664	1.10165			82.224	150.692	0.52208	8.33925			10.207	14.275	0.0648092	0.789974				119.878	43.436	1.32278	1.09863			21.441	147.084	0.236587	3.72021			76.668	52.303	0.845981	1.3229				28.889	4.4	1.26948	1.33409			3.201	26.25	0.140663
			147.802	19.236	0.938466	1.06451			94.52	195.114	0.600153	10.7976			129.458	21.392	0.821991	1.18383				121.317	43.059	1.33865	1.08909			37.065	144.005	0.408988	3.64233			31.478	73.52	0.347339	1.85955				28.689	3.678	1.2607	1.11517			3.129	14.99	0.137499
			142.985	18.294	0.907881	1.01238			93.299	169.433	0.5924	9.37637			87.109	20.088	0.553097	1.11166				106.793	46.93	1.17839	1.187			26.783	144.863	0.295533	3.66403			62.207	56.716	0.686414	1.43452				25.623	3.635	1.12596	1.10214			5.234	8.743	0.23
			155.208	17.909	0.985491	0.991079			50.294	78.215	0.319341	4.3284			38.31	15.636	0.243249	0.865292				57.353	32.321	0.632853	0.817497			41.325	109.052	0.455994	2.75826			63.866	100.747	0.70472	2.5482				27.505	4.025	1.20867	1.22039			2.565	11.936	0.112715
			104.418	16.173	0.663	0.895009			78.247	105.179	0.496828	5.82058			89.233	12.913	0.566583	0.714602				129.087	50.525	1.42439	1.27793			26.052	133.163	0.287467	3.3681			35.514	72.972	0.391874	1.84569				27.792	3.508	1.22128	1.06363			3.683	10.326	0.161844
			175.295	18.249	1.11303	1.00989			63.54	57.557	0.403446	3.18519			108.865	23.195	0.691236	1.2836				122.529	58.316	1.35203	1.47499			28.765	88.259	0.317403	2.23234			60.903	48.149	0.672025	1.21784				26.466	3.552	1.16301	1.07697			4.107	21.812	0.180476
			139.598	16.618	0.886375	0.919635			108.196	103.265	0.686989	5.71466			88.39	18.508	0.561231	1.02423				111.215	50.969	1.22719	1.28916			36.788	158.114	0.405932	3.99919			26.88	34.876	0.296603	0.882121				23.656	4.004	1.03953	1.21402			2.866	23.77	0.125942
			116.467	17.473	0.739505	0.966951			125.368	106.852	0.796022	5.91316			112.482	14.638	0.714203	0.810063				124.133	45.453	1.36973	1.14965			25.95	163.76	0.286341	4.14199			36.276	72.337	0.400282	1.82962				26.232	3.372	1.15273	1.02239			11.639	3.945	0.511459
			170.135	18.899	1.08027	1.04587			103.006	160.902	0.654035	8.90427			6.371	13.778	0.0404526	0.762471				115.403	47.618	1.2734	1.20441			60.798	123.231	0.670866	3.11689			46.761	51.987	0.515977	1.31491				24.16	3.315	1.06168	1.00511			4.075	25.931	0.17907
			117.141	16.916	0.743785	0.936127			56.884	52.775	0.361184	2.92055			121.33	19.242	0.770383	1.06485				117.232	50.121	1.29358	1.26771			45.873	166.085	0.506179	4.2008			25.724	75.767	0.283848	1.91638				28.882	4.081	1.26918	1.23736			2.236	26.239	0.0982577
			155.917	18.295	0.989992	1.01244			66.325	55.391	0.421129	3.06532			104.956	18.212	0.666416	1.00785				120.798	46.793	1.33293	1.18354			23.465	156.264	0.258921	3.9524			74.805	58.485	0.825424	1.47927				28.33	3.987	1.24492	1.20886			2.027	20.486	0.0890735
			98.901	16.081	0.62797	0.889918			8.275	12.424	0.052542	0.687541			123.676	16.742	0.785279	0.926498				106.153	45.426	1.17133	1.14896			40.672	120.824	0.448789	3.05601			50.712	47.221	0.559574	1.19436				24.349	3.865	1.06998	1.17187			1.31	4.15	0.057566
			115.98	16.773	0.736413	0.928213			9.845	9.88	0.0625107	0.546756			76.63	17.416	0.486561	0.963797				111.256	49.044	1.22764	1.24047			33.335	131.841	0.36783	3.33466			67.154	57.92	0.741001	1.46497				29.447	3.931	1.294	1.19188			3.463	8.67	0.152176
			151.261	18.783	0.960429	1.03945			7.932	11.978	0.0503641	0.662859			9.813	10.419	0.0623075	0.576585				117.768	53.946	1.29949	1.36446			31.987	122.097	0.352956	3.08821			50.042	116.08	0.552181	2.93602				20.645	3.259	0.907214	0.988133			2.8	15.254	0.123042
			23.736	13.754	0.150711	0.761143			62.485	50.945	0.396747	2.81928			73.132	26.563	0.46435	1.46999				120.956	48.219	1.33467	1.21961			23.955	160.344	0.264328	4.05559			59.895	53.727	0.660902	1.35892				22.192	2.982	0.975194	0.904146			3.322	13.648	0.14598
			195.399	20.577	1.24068	1.13873			5.27	5.703	0.0334618	0.315602			141.426	17.708	0.897982	0.979956				121.416	55.128	1.33975	1.39436			41.573	144.804	0.458731	3.66254			42.716	102.039	0.471343	2.58088				20.993	3.624	0.922506	1.0988			8.872	3.527	0.389867
			140.749	18.582	0.893683	1.02832			76.756	106.502	0.487361	5.89379			90.249	17.487	0.573034	0.967726				101.44	48.655	1.11932	1.23063			25.956	170.489	0.286408	4.31219			36.955	75.88	0.407774	1.91924				23.396	3.91	1.0281	1.18552			2.658	13.206	0.116802
			87.014	14.074	0.552494	0.778851			78.181	153.572	0.496409	8.49863			109.924	17.439	0.697961	0.965069				106.216	46.238	1.17202	1.1695			19.561	134.064	0.215843	3.39089			75.567	59.766	0.833833	1.51167				24.313	3.819	1.0684	1.15793			2.572	14.795	0.113023
			141.1	17.367	0.895912	0.961085			119.893	115.143	0.761259	6.37198			59.865	18.42	0.380112	1.01936				120.377	45.81	1.32828	1.15868			45.054	132.394	0.497142	3.34865			4.959	11.539	0.0547193	0.291857				24.762	3.434	1.08813	1.04119			2.147	15.074	0.0943467
			169.795	20.121	1.07811	1.11349			109.571	136.012	0.695719	7.52687			98.593	17.213	0.626015	0.952563				103.488	41.668	1.14192	1.05391			85.154	121.096	0.939619	3.06289			64.754	127.29	0.714518	3.21956				26.048	2.685	1.14464	0.814095			4.638	9.038	0.20381
			185.954	17.27	1.18071	0.955717			88.108	179.847	0.55944	9.95268			124.198	20.019	0.788593	1.10785				98.283	43.82	1.08449	1.10834			25.924	190.794	0.286054	4.82577			42.799	52.163	0.472259	1.31936				28.33	4.302	1.24492	1.30437			7.133	19.401	0.313449
			148.907	17.864	0.945482	0.988589			46.885	72.152	0.297696	3.99287			114.616	22.498	0.727752	1.24503				115.243	43.166	1.27163	1.0918			71.381	125.779	0.787643	3.18134			70.919	78.369	0.782545	1.98219				22.74	3.205	0.999276	0.97176			6.899	18.289	0.303166
			143.679	19.111	0.912287	1.0576			102.959	150.741	0.653736	8.34196			94.298	18.14	0.598744	1.00386				97.241	44.264	1.07299	1.11957			19.963	165.271	0.220279	4.18021			5.294	11.454	0.0584158	0.289707				22.434	3.628	0.985829	1.10001			4.608	32.909	0.202492
			164.812	16.955	1.04647	0.938285			110.117	136.205	0.699186	7.53755			89.187	16.364	0.566291	0.905579				112.502	49.144	1.24139	1.243			19.714	196.813	0.217531	4.97801			5.795	15.807	0.0639441	0.399808				20.032	3.268	0.880276	0.990862			7.475	13.281	0.328478
			168.25	18.907	1.0683	1.04631			19.911	12.449	0.126425	0.688924			103.186	16.368	0.655178	0.905801				121.677	39.91	1.34263	1.00945			22.801	122.816	0.251594	3.10639			4.814	15.25	0.0531194	0.385719				30.339	4.115	1.3332	1.24767			8.38	18.355	0.368247
			130.258	17.332	0.827071	0.959148			167.081	98.454	1.06088	5.44842			100.865	18.326	0.640441	1.01416				100.008	44.852	1.10352	1.13444			28.612	115.261	0.315715	2.9153			52.259	143.966	0.576644	3.64134				20.345	3.359	0.894031	1.01845			8.612	19.816	0.378442
			103.575	16.003	0.657648	0.885602			174.614	101.23	1.10871	5.60204			54.667	20.104	0.347107	1.11255				122.932	52.374	1.35647	1.3247			12.188	69.69	0.134487	1.76267			66.413	80.084	0.732824	2.02557				18.237	2.386	0.801398	0.723438			4.881	24.888	0.214488
			193.46	18.954	1.22837	1.04891			110.757	168.933	0.70325	9.3487			77.233	17.145	0.49039	0.948799				106.432	39.559	1.17441	1.00057			24.249	218.856	0.267572	5.53554			52.004	54.242	0.57383	1.37195				27.798	3.706	1.22154	1.12366			5.738	15.88	0.252148
			10.232	9.051	0.0649679	0.50088			82.932	144.456	0.526575	7.99415			88.727	17.519	0.563371	0.969497				109.181	44.097	1.20474	1.11535			34.802	115.143	0.384017	2.91232			79.159	65.217	0.873468	1.64954				25.245	3.662	1.10935	1.11032			6.272	10.652	0.275614
			149.192	18.927	0.947292	1.04741			105.252	127.622	0.668296	7.06257			108.287	17.442	0.687566	0.965235				71.047	38.866	0.783957	0.983041			37.507	95.301	0.413865	2.41046			67.831	122.188	0.748471	3.09051				24.806	3.854	1.09006	1.16854			5.753	12.332	0.252807
			130.669	17.176	0.829681	0.950515			102.592	191.188	0.651406	10.5803			97.392	16.625	0.618389	0.920023				96.676	42.497	1.06676	1.07488			42.94	84.327	0.473815	2.13289			59.618	44.082	0.657846	1.11497				24.919	4.212	1.09503	1.27708			2.076	6.889	0.0912267
			103.164	15.942	0.655038	0.882226			171.474	105.876	1.08877	5.85915			130.014	19.172	0.825522	1.06097				86.782	42.324	0.957583	1.0705			20.503	121.445	0.226237	3.07172			54.11	57.477	0.597069	1.45377				23.848	4.1	1.04796	1.24313			9.514	11.273	0.418079
			163.788	19.339	1.03997	1.07021			177.534	110.141	1.12725	6.09517			120.6	18.551	0.765748	1.02661				110.614	40.215	1.22055	1.01716			20.283	186.547	0.22381	4.71835			41.844	56.694	0.461721	1.43397				28.276	4.28	1.24255	1.2977			10.974	18.483	0.482236
			117.742	16.902	0.747601	0.935352			4.407	13.468	0.0279822	0.745315			119.21	19.139	0.756922	1.05915				94.262	42.133	1.04012	1.06567			68.897	102.05	0.760234	2.58116			37.242	83.454	0.410941	2.11081				28.406	4.204	1.24826	1.27466			7.702	9.178	0.338453
			117.762	16.671	0.747728	0.922568			148.797	80.799	0.944784	4.47139			114.088	20.242	0.7244	1.12019				95.031	45.972	1.04861	1.16277			18.485	155.219	0.20397	3.92597			45.611	88.967	0.503288	2.25025				28.92	4.561	1.27085	1.3829			2.962	13.843	0.130161
			142.456	17.071	0.904522	0.944704			99.118	199.727	0.629348	11.0528			95.689	17.973	0.607576	0.994621				105.422	40.179	1.16326	1.01625			20.551	186.246	0.226767	4.71073			49.51	64.466	0.546311	1.63054				11.46	2.03	0.503593	0.615499			2.234	10.644	0.0981698
			141.685	16.195	0.899626	0.896227			120.1	159.512	0.762573	8.82735			118.287	17.522	0.751061	0.969663				101.842	41.444	1.12376	1.04825			19.74	168.012	0.217818	4.24954			35.344	21.285	0.389998	0.538363				11.796	1.808	0.518358	0.548188			5.694	14.526	0.250214
			120.581	16.308	0.765627	0.90248			126.746	160.823	0.804772	8.8999			105.409	18.264	0.669293	1.01072				97.403	36.461	1.07478	0.922211			23.795	216.702	0.262562	5.48106			81.677	47.977	0.901253	1.21349				15.525	2.067	0.682223	0.626717			4.169	22.355	0.183201
			153.828	18.086	0.976728	1.00087			103.675	108.801	0.658283	6.02102			83.839	17.237	0.532334	0.953891				108.42	41.907	1.19634	1.05996			25.296	172.65	0.279125	4.36685			27.43	52.187	0.302672	1.31997				17.761	1.922	0.780481	0.582753			28.702	14.449	1.26127
			133.088	18.373	0.84504	1.01676			85.579	145.941	0.543382	8.07633			88.151	16.844	0.559713	0.932142				84.989	30.49	0.937798	0.771186			20.985	199.933	0.231556	5.05692			102.136	53.732	1.127	1.35905				16.744	2.036	0.73579	0.617318			3.401	13.951	0.149452
			172.443	17.205	1.09492	0.95212			166.513	71.348	1.05727	3.94838			68.239	20.698	0.433282	1.14542				105.53	37.437	1.16445	0.946897			42.281	143.684	0.466543	3.63421			33.383	70.58	0.36836	1.78519				16.184	2.224	0.711182	0.67432			21.748	12.188	0.955684
			158.819	17.517	1.00842	0.969386			54.956	164.788	0.348942	9.11932			109.679	19.237	0.696405	1.06457				91.386	34.518	1.00839	0.873066			18.915	218.575	0.208715	5.52843			74.089	85.847	0.817524	2.17133				17.883	2.273	0.785842	0.689176			16.802	17.164	0.738339
			155.766	16.903	0.989034	0.935407			165.914	165.462	1.05347	9.15662			100.652	19.487	0.639088	1.07841				76.728	32.579	0.846644	0.824023			16.399	153.768	0.180952	3.88927			10.688	30.266	0.117935	0.76552				19.541	2.149	0.8587	0.65158			25.122	15.894	1.10395
			151.063	19.093	0.959172	1.0566			103.036	152.769	0.654225	8.45419			81.055	19.221	0.514657	1.06368				100.42	40.101	1.10807	1.01428			16.718	129.641	0.184472	3.27902			26.449	70.438	0.291848	1.78159				19.393	2.225	0.852197	0.674623			6.791	19.884	0.29842
			169.455	18.932	1.07595	1.04769			148.793	57.859	0.944759	3.2019			15.019	18.008	0.0953629	0.996558				107.116	41.679	1.18196	1.05419			27.602	178.962	0.30457	4.5265			76.452	92.552	0.843598	2.34092				21.792	2.452	0.957617	0.743449			5.09	15.751	0.223672
			172.74	18.605	1.09681	1.0296			90.007	145.404	0.571498	8.04662			128.811	19.822	0.817883	1.09694				110.538	45.842	1.21971	1.15949			27.885	146.233	0.307693	3.69868			29.888	64.961	0.329795	1.64306				19.987	2.434	0.878299	0.737992			10.955	13.915	0.481401
			110.801	15.621	0.703529	0.864462			129.775	109.116	0.824004	6.03845			90	20.271	0.571453	1.12179				110.923	53.008	1.22396	1.34074			27.345	151.788	0.301734	3.83918			56.617	56.909	0.624732	1.4394				16.356	2.162	0.71874	0.655521			5.365	14.311	0.235757
			147.183	17.855	0.934536	0.988091			179.418	141.824	1.13921	7.8485			89.68	17.366	0.569422	0.96103				87.344	35.152	0.963784	0.889102			20.464	146.967	0.225807	3.71725			27.152	65.723	0.299605	1.66234				15.391	1.971	0.676335	0.59761			27.513	15.812	1.20902
			178.821	17.304	1.13542	0.957599			156.309	88.586	0.992481	4.90232			87.749	17.614	0.557161	0.974754				95.761	37.581	1.05666	0.950539			17.972	179.601	0.198309	4.54266			58.448	57.142	0.644936	1.4453				21.28	2.455	0.935118	0.744359			18.714	16.161	0.822359
			164.255	18.683	1.04293	1.03391			116.026	73.576	0.736705	4.07168			98.537	17.768	0.625659	0.983276				32.485	26.568	0.358451	0.671986			27.616	126.828	0.304725	3.20787			53.792	75.528	0.59356	1.91034				8.174	1.448	0.359194	0.439035			11.998	13.006	0.527234
			156.407	19.133	0.993104	1.05881			117.186	169.167	0.744071	9.36165			96.569	18.903	0.613163	1.04609				117.062	44.843	1.2917	1.13422			26.021	138.96	0.287125	3.51473			91.44	67.492	1.00898	1.70708				10.728	1.811	0.471426	0.549097			20.68	10.452	0.908752
			195.027	23.095	1.23832	1.27807			73.834	151.113	0.468808	8.36255			113.413	16.423	0.720114	0.908844				91.034	39.698	1.0045	1.00408			25.962	142.303	0.286474	3.59928			55.901	63.975	0.616831	1.61812				12.327	1.841	0.541692	0.558194			11.55	18.583	0.507548
			171.797	19.88	1.09082	1.10015			153.686	142.158	0.975827	7.86698			108.245	18.777	0.6873	1.03911				104.236	40.735	1.15018	1.03031			26.69	124.326	0.294507	3.14459			49.641	70.18	0.547756	1.77507				8.453	1.295	0.371455	0.392646			14.44	17.057	0.634544
			84.139	13.683	0.534239	0.757213			121.391	192.994	0.77077	10.6802			98.852	17.206	0.627659	0.952175				78.547	38.998	0.866715	0.986379			21.957	195.563	0.242281	4.94639			61.421	91.73	0.677741	2.32013				6.525	1.832	0.286731	0.555465			16.325	5.854	0.717378
			105.458	15.477	0.669604	0.856493			123.511	128.97	0.784231	7.13716			81.897	18.126	0.520004	1.00309				95.3	42.205	1.05157	1.06749			21.913	136.709	0.241796	3.45779			59.002	54.582	0.651049	1.38055				10.886	1.997	0.478369	0.605493			6.741	15.93	0.296223
			190.682	20.392	1.21073	1.12849			79.568	91.841	0.505216	5.08246			103.123	19.581	0.654778	1.08361				106.174	37.552	1.17156	0.949805			21.339	121.213	0.235462	3.06585			4.077	16.551	0.044987	0.418626				13.754	1.835	0.604399	0.556374			8.214	18.924	0.360952
			168.99	19.022	1.073	1.05267			138.453	127.371	0.879105	7.04868			7.48	16.18	0.0474941	0.895397				83.458	36.914	0.920905	0.933668			20.2	163.42	0.222894	4.13339			68.888	68.727	0.760134	1.73832				10.992	1.716	0.483027	0.520293			6.744	14.501	0.296355
			180.864	20.82	1.14839	1.15217			110.585	109.293	0.702158	6.04824			77.692	16.132	0.493304	0.89274				106.735	43.636	1.17775	1.10369			22.718	193.664	0.250678	4.89836			36.495	70.872	0.402699	1.79257				19.395	2.327	0.852284	0.705549			9.704	11.991	0.426428
			183.378	20.925	1.16436	1.15798			141.391	158.799	0.89776	8.78789			81.184	17.772	0.515476	0.983497				97.576	40.164	1.07669	1.01587			22.349	175.075	0.246607	4.42818			86.425	53.176	0.953644	1.34498				19.579	2.124	0.86037	0.643999			7.909	15.372	0.347549
			176.047	20.275	1.11781	1.12201			118.251	110.456	0.750833	6.1126			95.298	18.016	0.605093	0.997				90.792	34.111	1.00183	0.862772			24.969	224.259	0.275517	5.6722			71.091	46.683	0.784443	1.18076				15.584	2.053	0.684816	0.622472			10.513	11.398	0.461978
			191.426	20.603	1.21546	1.14016			140.972	143.468	0.895099	7.93948			83.786	17.798	0.531998	0.984936				91.656	35.566	1.01136	0.899573			25.109	174.629	0.277061	4.4169			101.471	41.4	1.11967	1.04713				13.61	2.377	0.598071	0.720709			8.209	8.465	0.360732
			175.701	18.832	1.11561	1.04216			76.41	102.003	0.485164	5.64482			89.832	16.833	0.570387	0.931533				97.831	47.593	1.0795	1.20377			22.903	207.956	0.25272	5.25985			74.694	52.528	0.8242	1.32859				15.618	2.048	0.68631	0.620956			4.263	25.266	0.187331
			162.573	22.074	1.03225	1.22157			81.76	92.607	0.519134	5.12485			88.402	18.303	0.561307	1.01288				92.691	37.634	1.02278	0.951879			44.981	147.601	0.496336	3.73328			78.341	67.419	0.864442	1.70523				21.345	3.109	0.937974	0.942653			4.617	28.327	0.202887
			160.587	16.149	1.01964	0.893681			12.136	8.987	0.0770573	0.497338			84.266	16.825	0.535046	0.931091				96.371	41.009	1.06339	1.03724			20.311	225.112	0.224119	5.69377			65.312	71.722	0.720675	1.81407				18.036	2.325	0.792565	0.704943			10.381	10.545	0.456178
			170.036	19.869	1.07964	1.09954			93.153	120.087	0.591473	6.64558			51.2	16.705	0.325094	0.92445				108.003	31.833	1.19174	0.805154			18.071	158.728	0.199402	4.01472			75.913	72.494	0.837651	1.8336				18.206	1.894	0.800036	0.574263			8.069	7.525	0.35458
			189.023	19.023	1.2002	1.05273			125.272	137.438	0.795412	7.60578			72.305	19.661	0.459099	1.08803				110.567	44.478	1.22003	1.12499			18.642	134.163	0.205702	3.39339			55.386	70.107	0.611148	1.77322				15.295	1.947	0.672116	0.590333			7.258	17.661	0.318942
			179.492	18.317	1.13968	1.01366			11.277	9.443	0.0716031	0.522573			70.018	22.12	0.444578	1.22411				80.028	32.265	0.883057	0.816081			29.199	183.821	0.322192	4.6494			18.224	151.01	0.20109	3.81951				14.445	1.837	0.634764	0.556981			9.614	9.676	0.422473
			176.383	21.311	1.11994	1.17934			146.544	73.431	0.930479	4.06365			65.87	18.22	0.41824	1.00829				77.672	35.252	0.85706	0.891631			28.467	149.744	0.314115	3.78749			51.167	58.753	0.564595	1.48604				15.415	2	0.677389	0.606403			7.987	13.636	0.350977
			169.955	18.118	1.07913	1.00265			101.763	182.33	0.646142	10.0901			58.433	19.617	0.371019	1.0856				103.758	51.731	1.1449	1.30844			21.416	148.739	0.236312	3.76207			42.71	85.283	0.471277	2.15707				13.493	1.97	0.59293	0.597306			8.636	13.946	0.379496
			180.566	20.398	1.1465	1.12882			135.686	67.214	0.861536	3.7196			75.323	19.54	0.478262	1.08134				98.818	41.362	1.09039	1.04617			18.283	187.25	0.201741	4.73613			11.768	60.793	0.129852	1.53764				14.298	1.961	0.628304	0.594578			0.286	0.675	0.0125678
			169.937	20.007	1.07901	1.10718			166.572	102.616	1.05765	5.67874			8.948	19.457	0.0568152	1.07674				99.428	37.437	1.09712	0.946897			29.646	128.763	0.327124	3.25681			51.648	39.997	0.569902	1.01165				13.732	2.062	0.603432	0.625201			5.788	9.945	0.254345
			152.075	20.098	0.965598	1.11222			105.919	154.312	0.672531	8.53958			41.47	20.802	0.263313	1.15118				94.083	38.437	1.03814	0.97219			27.506	141.914	0.303511	3.58944			66.344	45.462	0.732063	1.14987				23.409	2.965	1.02867	0.898992			13.349	15.295	0.586602
			174.351	17.226	1.10704	0.953282			132.219	165.496	0.839522	9.1585			52.809	21.025	0.33531	1.16352				110.793	42.197	1.22253	1.06729			28.105	144.581	0.31012	3.6569			39.524	40.084	0.436122	1.01385				17.312	2.291	0.76075	0.694634			5.488	15.993	0.241162
			147.645	19.45	0.937469	1.07636			118.277	77.429	0.750998	4.2849			49.963	20.73	0.317239	1.14719				85.223	39.062	0.94038	0.987998			27.14	124.621	0.299472	3.15205			38.666	75.879	0.426654	1.91921				17.792	2.237	0.781843	0.678261			15.771	13.303	0.693033
			147.748	17.28	0.938123	0.95627			125.401	129.669	0.796232	7.17585			31.988	22.341	0.203107	1.23634				96.401	48.027	1.06372	1.21475			22.826	200.983	0.25187	5.08348			35.073	102.282	0.387008	2.58703				9.703	1.716	0.426384	0.520293			13.304	15.089	0.584625
			141.202	16.768	0.89656	0.927936			119.41	157.762	0.758192	8.7305			28.889	19.936	0.18343	1.10325				134.074	53.342	1.47942	1.34918			22.723	139.881	0.250734	3.53802			85.594	138.702	0.944474	3.5082				15.157	2.113	0.666052	0.640664			9.183	8.242	0.403533
			169.463	15.999	1.076	0.88538			135.033	102.327	0.85739	5.66275			44.648	21.296	0.283492	1.17851				102.693	45.81	1.13315	1.15868			20.915	121.146	0.230783	3.06415			3.276	12.756	0.0361485	0.322638				15.1	1.609	0.663547	0.487851			15.003	20.473	0.659285
			166.408	19.938	1.0566	1.10336			128.689	141.829	0.817109	7.84878			53.431	20.837	0.339259	1.15311				68.286	38.921	0.753492	0.984432			21.625	121.542	0.238618	3.07417			73.576	59.459	0.811863	1.5039				14.677	1.581	0.644959	0.479361			9.399	16.015	0.413025
			190.691	19.183	1.21079	1.06158			136.39	166.049	0.866006	9.18911			51.206	21.933	0.325132	1.21377				118.942	44.285	1.31245	1.1201			20.568	147.25	0.226954	3.7244			67.815	73.626	0.748294	1.86223				20.94	2.385	0.920177	0.723135			2.114	7.186	0.0928966
			158.321	19.073	1.00526	1.05549			113.909	63.63	0.723263	3.52127			26.101	22.703	0.165728	1.25638				112.32	49.135	1.23938	1.24278			22.421	135.553	0.247401	3.42855			22.014	30.789	0.24291	0.778748				16.324	2.138	0.717334	0.648244			16.025	22.477	0.704195
			182.633	20.256	1.15963	1.12096			109.532	72.558	0.695472	4.01534			167.528	18.805	1.06372	1.04066				113.174	51.835	1.2488	1.31107			33.482	148.873	0.369452	3.76546			71.498	61.003	0.788934	1.54295				17.24	2.387	0.757586	0.723741			4.91	10.468	0.215763
			182.278	20.493	1.15737	1.13408			67.717	142.773	0.429968	7.90102			159.649	21.644	1.01369	1.19777				109.819	53.407	1.21178	1.35083			19.793	145.671	0.218403	3.68447			79.924	95.464	0.881909	2.41458				15.073	1.94	0.662361	0.58821			14.104	6.755	0.619779
			171.163	19.187	1.0868	1.0618			126.474	125.893	0.803045	6.96688			103.065	17.83	0.654409	0.986707				120.183	51.836	1.32614	1.31109			21.894	142.622	0.241586	3.60735			65.476	113.057	0.722485	2.85956				14.028	2.085	0.61644	0.632175			5.136	33.672	0.225694
			179.571	19.625	1.14018	1.08604			95.022	138.64	0.603341	7.6723			114.102	16.18	0.724489	0.895397				110.6	41.913	1.2204	1.06011			24.01	111.916	0.264935	2.8307			74.824	85.372	0.825634	2.15932				20.105	3.101	0.883484	0.940227			6.129	16.659	0.26933
			151.152	17.579	0.959737	0.972817			146.496	130.901	0.930174	7.24402			105.731	16.972	0.671337	0.939226				93.253	37.647	1.02899	0.952208			15.102	141.453	0.166641	3.57778			45.808	112.299	0.505461	2.84039				17.423	1.978	0.765628	0.599732			8.622	12.423	0.378881
			161.324	23.396	1.02432	1.29473			72.011	147.592	0.457233	8.1677			118.268	17.448	0.750941	0.965567				98.889	42.329	1.09118	1.07063			7.396	51.654	0.08161	1.30649			40.899	89.683	0.451294	2.26836				15.617	1.965	0.686266	0.59579			7.792	20.347	0.342408
			156.911	21.843	0.996304	1.20879			132.245	75.336	0.839687	4.16907			121.947	18.437	0.7743	1.0203				101.175	42.08	1.1164	1.06433			14.693	122.37	0.162128	3.09511			32.287	51.9	0.356266	1.31271				18.556	2.683	0.815416	0.813489			8.181	13.717	0.359502
			171.558	17.628	1.0893	0.975529			154.989	98.607	0.9841	5.45688			141.98	18.833	0.9015	1.04221				102.602	44.847	1.13215	1.13432			19.766	111.312	0.218105	2.81542			59.155	88.755	0.652737	2.24489				10.371	1.687	0.455738	0.511501			8.388	14.23	0.368598
			146.507	20.251	0.930244	1.12068			66.674	142.979	0.423345	7.91242			120.277	17.93	0.763697	0.992241				101.717	44.075	1.12238	1.11479			18.705	135.809	0.206398	3.43503			49.29	67.915	0.543883	1.71778				16.684	2.133	0.733154	0.646728			2.251	4.56	0.0989169
			158.522	19.949	1.00653	1.10397			162.298	121.071	1.03051	6.70004			152.252	16.397	0.966721	0.907405				107.235	45.428	1.18327	1.14901			21.799	88.996	0.240538	2.25098			46.509	80.129	0.513197	2.02671				13.976	1.519	0.614155	0.460563			2.165	4.404	0.0951377
			177.598	17.716	1.12766	0.980398			150.401	71.56	0.954969	3.96011			4.75	8.378	0.03016	0.463636				93.403	45.298	1.03064	1.14573			17.58	198.157	0.193984	5.012			28.6	101.58	0.315582	2.56927				13.513	1.785	0.593809	0.541214			6.065	27.298	0.266517
			176	19.445	1.11751	1.07608			84.261	168.157	0.535014	9.30576			138.568	14.097	0.879835	0.780124				117.956	40.646	1.30157	1.02806			23.08	136.879	0.254673	3.46209			62.765	92.806	0.692571	2.34735				18.221	2.356	0.800695	0.714342			0.682	0.415	0.0299695
			192.679	18.062	1.22341	0.999546			111.765	108.954	0.70965	6.02948			22.742	7.192	0.1444	0.398003				88.549	42.75	0.977081	1.08128			25.312	159.371	0.279301	4.03098			59.614	79.554	0.657802	2.01217				14.173	2.07	0.622811	0.627627			10.21	10.647	0.448663
			162.291	19.174	1.03046	1.06108			12.186	13.102	0.0773748	0.725061			106.442	17.292	0.675852	0.956934				87.591	38.997	0.96651	0.986354			17.373	194.699	0.1917	4.92454			58.288	72.222	0.64317	1.82672				17.933	2.332	0.788039	0.707065			12.215	8.73	0.53677
			187.158	18.925	1.18836	1.0473			2.746	6.648	0.0174357	0.367898			145.587	19.086	0.924402	1.05621				95.491	41.592	1.05368	1.05199			23.424	173.063	0.258469	4.37729			47.862	46.602	0.528126	1.17871				16.869	2.081	0.741283	0.630962			5.988	9.615	0.263134
			167.496	18.67	1.06351	1.03319			61.987	102.695	0.393585	5.68311			127.058	19.772	0.806753	1.09418				99.191	42.482	1.09451	1.0745			17.526	142.483	0.193388	3.60383			50.816	70.457	0.560721	1.78207				18.786	2.627	0.825523	0.79651			5.495	16.362	0.24147
			192.421	21.409	1.22177	1.18477			114.515	68.217	0.727111	3.77511			93.547	29.142	0.593975	1.61271				91.487	41.084	1.0095	1.03914			23.189	177.904	0.255876	4.49974			71.201	79.327	0.785657	2.00642				14.645	2.105	0.643553	0.638239			6.999	19.55	0.307561
			169.13	19.781	1.07389	1.09467			89.835	127.103	0.570406	7.03384			130.963	16.765	0.831547	0.92777				85.795	37.923	0.946692	0.959189			18.94	152.02	0.208991	3.84505			42.814	76.863	0.472425	1.9441				17.08	2.03	0.750555	0.615499			15.385	21.428	0.676071
			161.339	20.668	1.02442	1.14376			120.724	96.84	0.766535	5.3591			128.935	17.734	0.818671	0.981395				79.909	34.433	0.881744	0.870916			28.137	132.537	0.310473	3.35227			38.339	58.766	0.423046	1.48637				16.674	2.152	0.732714	0.652489			2.01	7.045	0.0883265
			156.049	19.031	0.99083	1.05317			114.681	105.869	0.728165	5.85876			130.191	16.388	0.826646	0.906907				98.487	44.309	1.08674	1.12071			27.413	145.954	0.302485	3.69163			63.319	79.146	0.698684	2.00185				20.206	2.292	0.887923	0.694937			0.307	0.399	0.0134907
			107.603	14.857	0.683223	0.822182			5.939	9.954	0.0377096	0.550852			103.241	16.989	0.655527	0.940166				94.975	42.869	1.04799	1.08429			28.028	145.962	0.309271	3.69183			32.924	53.121	0.363295	1.34359				13.99	1.807	0.61477	0.547885			5.982	19.618	0.26287
			170.5	18.808	1.08259	1.04083			94.305	110.613	0.598788	6.12129			134.433	18.18	0.85358	1.00608				60.356	33.904	0.665989	0.857536			19.916	175.786	0.21976	4.44617			70.678	73.155	0.779886	1.85031				14.695	2.168	0.64575	0.65734			15.156	6.76	0.666008
			188.291	17.191	1.19555	0.951345			131.299	144.861	0.833681	8.01657			129.683	19.482	0.82342	1.07813				99.817	43.482	1.10142	1.09979			19.546	229.735	0.215677	5.8107			15.097	164.81	0.166586	4.16855				13.337	2.263	0.586075	0.686144			5.324	35.425	0.233955
			198.17	19.619	1.25828	1.08571			78.397	96.665	0.49778	5.34941			90.487	22.434	0.574546	1.24149				96.041	35.92	1.05975	0.908527			23.529	102.203	0.259627	2.58503			80.829	73.93	0.891895	1.86992				6.759	1.284	0.297014	0.38931			0.192	0.427	0.00843715
			202.324	18.571	1.28465	1.02771			130.509	52.256	0.828665	2.89183			154.368	15.303	0.980157	0.846864				95.842	40.338	1.05755	1.02027			25.697	101.298	0.28355	2.56214			69.46	74.947	0.766446	1.89564				15.296	2.141	0.67216	0.649154			6.563	18.362	0.288401
			161.542	17.514	1.02571	0.96922			67.997	141.506	0.431746	7.8309			111.91	19.042	0.710571	1.05378				92.232	37.77	1.01772	0.955319			21.389	129.031	0.236014	3.26359			73.743	77.054	0.813706	1.94893				6.912	1.157	0.303738	0.350804			0.278	0.391	0.0122163
			185.985	19.873	1.18091	1.09977			121.349	73.793	0.770503	4.08368			176.503	16.542	1.1207	0.91543				92.788	34.838	1.02386	0.88116			27.125	150.348	0.299307	3.80276			58.186	56.554	0.642045	1.43042				17.124	2.068	0.752489	0.62702			7.45	21.761	0.327379
			177.765	18.966	1.12872	1.04957			125.329	65.596	0.795774	3.63006			110.332	16.229	0.700551	0.898108				95.548	38.358	1.05431	0.970192			21.463	146.615	0.23683	3.70834			45.4	76.075	0.500959	1.92417				14.528	2.231	0.638411	0.676442			8.285	14.263	0.364072
			156.815	17.1	0.995694	0.946309			11.879	11.462	0.0754255	0.634304			120.462	17.238	0.764871	0.953946				85.113	36.991	0.939167	0.935616			27.945	158.966	0.308355	4.02074			92.676	85.358	1.02262	2.15897				17.976	2.445	0.789929	0.741327			2.422	4.425	0.106431
			186.118	19.22	1.18175	1.06363			63.91	143.628	0.405795	7.94833			145.018	19.914	0.920789	1.10204				66.083	34.689	0.729183	0.877391			18.578	199.103	0.204996	5.03593			26.08	76.018	0.287776	1.92273				15.336	2.252	0.673918	0.682809			6.275	26.077	0.275746
			208.373	18.2	1.32306	1.00718			85.932	85.577	0.545624	4.73581			99.041	16.164	0.628859	0.894511				73.634	31.183	0.812503	0.788714			24.231	131.346	0.267373	3.32214			24.843	98.028	0.274126	2.47943				23.625	3.02	1.03817	0.915668			5.962	27.968	0.261991
			198.909	19.008	1.26297	1.0519			56.452	41.448	0.358441	2.29372			97.165	16.939	0.616948	0.9374				101.26	39.13	1.11734	0.989718			22.746	108.942	0.250987	2.75548			29.162	89.943	0.321784	2.27493				21.451	2.629	0.942632	0.797116			8.934	16.406	0.392591
			179.157	17.755	1.13755	0.982557			74.464	114.477	0.472808	6.33513			93.405	17.256	0.593073	0.954942				77.158	33.593	0.851388	0.84967			19.073	201.755	0.210458	5.103			19.221	56.756	0.212091	1.43553				16.789	2.391	0.737768	0.724954			5.105	34.647	0.224332
			199.669	20.166	1.26779	1.11598			15.399	12.376	0.0977757	0.684884			13.807	10.483	0.0876673	0.580126				113.538	47.529	1.25282	1.20215			17.347	154.164	0.191413	3.89928			43.847	124.859	0.483823	3.15807				14.754	2.052	0.648343	0.622169			3.954	16.217	0.173753
			188.057	17.483	1.19406	0.967504			95.567	107.504	0.606801	5.94924			103.121	19.415	0.654765	1.07442				74.291	36.426	0.819753	0.921325			20.425	172.022	0.225377	4.35096			35.633	45.111	0.393187	1.141				12.228	2.093	0.537341	0.6346
			173.683	18.563	1.1028	1.02727			14.642	11.02	0.0929691	0.609844			142.915	18.334	0.907436	1.0146				94.221	35.381	1.03967	0.894894			19.68	188.816	0.217156	4.77574			27.81	106.463	0.306865	2.69278				13.84	2.071	0.608178	0.62793
			194.933	20.698	1.23772	1.14542			106.208	106.026	0.674366	5.86745			131.992	18.539	0.838081	1.02594				80.547	40.322	0.888784	1.01987			17.798	118.987	0.196389	3.00955			38.489	109.941	0.424701	2.78075				11.233	1.57	0.493618	0.476026
			150.311	19.781	0.954397	1.09467			54.307	44.848	0.344821	2.48188			104.419	17.422	0.663007	0.964129				76.525	34.984	0.844404	0.884853			19.42	193.044	0.214287	4.88268			42.866	39.46	0.472998	0.998065				13.455	2.019	0.59126	0.612163
			161.785	17.664	1.02725	0.977521			73.112	107.793	0.464223	5.96523			129.441	16.016	0.821883	0.886321				70.391	35.131	0.776719	0.888571			21.106	133.976	0.232891	3.38866			21.011	81.023	0.231843	2.04932				13.686	1.958	0.601411	0.593668
			19.051	13.427	0.120964	0.743046			126.615	66.852	0.80394	3.69957			7.615	14.786	0.0483513	0.818253				82.512	32.519	0.910466	0.822505			18.814	118.484	0.2076	2.99682			29.804	114.912	0.328868	2.90648				17.783	2.457	0.781448	0.744966
			171.751	19.6	1.09053	1.08466			71.794	137.124	0.455855	7.5884			97.576	16.178	0.619557	0.895286				61.781	26.637	0.681713	0.673732			22.947	126.434	0.253205	3.1979			17.191	160.991	0.189691	4.07196				25.453	2.663	1.11849	0.807425
			186.46	22.011	1.18392	1.21808			111.609	160.342	0.708659	8.87328			112.989	18.069	0.717422	0.999933				115.115	47.997	1.27022	1.21399			22.125	88.695	0.244135	2.24337			5.227	7.92	0.0576765	0.200321				13.851	2.064	0.608662	0.625807
			175.163	18.61	1.11219	1.02987			138.166	78.501	0.877283	4.34422			95.746	19.338	0.607938	1.07016				65.989	31.695	0.728146	0.801664			19.044	87.32	0.210138	2.20859			79.835	81.794	0.880927	2.06882				17.913	2.647	0.78716	0.802574
			172.258	17.863	1.09375	0.988533			113.134	52.276	0.718342	2.89294			85.923	16.489	0.545567	0.912497				75.578	33.271	0.833954	0.841526			17.04	192.429	0.188025	4.86712			45.401	77.955	0.50097	1.97172				16.864	2.758	0.741063	0.836229
			160.056	17.665	1.01627	0.977576			87.004	84.311	0.55243	4.66575			129.626	18.508	0.823058	1.02423				88.171	41.901	0.97291	1.05981			20.943	121.072	0.231092	3.06228			37.526	54.787	0.414075	1.38573				14.36	2.02	0.631029	0.612467
			152.847	19.264	0.970499	1.06606			11.633	14.467	0.0738635	0.8006			115.954	20.546	0.736248	1.13701				89.293	33.912	0.98529	0.857739			25.493	65.662	0.281299	1.66079			66.704	79.511	0.736035	2.01108				23.314	2.863	1.0245	0.868065
			178.128	18.151	1.13102	1.00447			96.036	118.066	0.609779	6.53374			102.236	19.123	0.649146	1.05826				90.815	42.562	1.00208	1.07652			37.974	88.541	0.419018	2.23947			76.921	76.072	0.848773	1.92409				12.25	2.069	0.538308	0.627323
			165.116	19.08	1.0484	1.05588			128.988	130.334	0.819007	7.21265			92.52	17.14	0.587454	0.948523				77.09	32.455	0.850638	0.820887			25.339	121.124	0.279599	3.0636			15.077	166.024	0.166365	4.19926				14.364	2.403	0.631205	0.728593
			168.546	18.448	1.07018	1.02091			100.233	111.808	0.636428	6.18742			106.132	17.632	0.673883	0.97575				77.08	41.997	0.850528	1.06223			28.711	112.942	0.316807	2.85665			86.139	75.548	0.950488	1.91084				16.836	2.192	0.739833	0.664617
			164.723	16.951	1.04591	0.938064			76.903	138.984	0.488294	7.69134			74.457	17.588	0.472763	0.973315				61.933	33.487	0.68339	0.846989			23.607	118.348	0.260488	2.99338			75.438	76.967	0.832409	1.94673				14.855	2.018	0.652781	0.61186
			157.456	20.119	0.999764	1.11338			107.656	107.75	0.68356	5.96285			58.697	13.878	0.372696	0.768005				77.256	31.693	0.85247	0.801613			16.312	183.475	0.179992	4.64065			81.334	78.375	0.897468	1.98234				15.055	2.226	0.66157	0.674926
			166.809	17.272	1.05915	0.955828			92.136	138.845	0.585016	7.68364			64.53	15.405	0.409732	0.852508				92.012	41.269	1.01529	1.04382			25.599	117.811	0.282468	2.9798			62.329	58.142	0.68776	1.47059				15.79	2.375	0.693868	0.720103
			190.011	20.576	1.20647	1.13867			3.748	10.09	0.0237979	0.558378			103.678	16.829	0.658302	0.931312				88.635	44.521	0.97803	1.12607			28.112	134.901	0.310198	3.41206			48.376	77.063	0.533798	1.94916				18.199	2.356	0.799728	0.714342
			146.574	16.649	0.930669	0.921351			20.037	52.809	0.127225	2.92244			101.015	16.919	0.641393	0.936293				63.689	32.748	0.702767	0.828298			23.78	140.335	0.262397	3.5495			96.711	85.31	1.06714	2.15775				16.962	2.396	0.74537	0.72647
			175.883	17.668	1.11677	0.977742			53.634	66.327	0.340548	3.67052			131.71	20.431	0.83629	1.13065				78.055	31.619	0.861286	0.799742			35.751	108.733	0.394489	2.75019			24.254	70.235	0.267627	1.77646				16.767	2.331	0.736801	0.706762
			156.172	16.631	0.991611	0.920355			67.984	78.948	0.431663	4.36896			89.984	18.124	0.571352	1.00298				81.884	36.14	0.903537	0.914092			32.282	120.465	0.356211	3.04693			24.066	94.413	0.265553	2.38799				17.694	2.374	0.777537	0.7198
			154.07	18.218	0.978265	1.00818			57.405	89.538	0.364492	4.95501			64.242	14.224	0.407903	0.787152				82.227	31.547	0.907321	0.797921			18.626	114.743	0.205526	2.9022			29.863	89.989	0.329519	2.2761				11.9	2.155	0.522928	0.653399
			180.882	18.075	1.14851	1.00027			33.245	53.156	0.211089	2.94164			69.858	13.57	0.443562	0.75096				90.507	36.344	0.998686	0.919251			21.359	136.335	0.235683	3.44833			13.848	43.99	0.152804	1.11264				9.675	1.334	0.425154	0.40447
			176.289	18.934	1.11934	1.0478			85.382	51.239	0.542132	2.83555			84.885	16.35	0.538976	0.904804				60.276	38.104	0.665106	0.963767			9.488	75.168	0.104694	1.90123			45.73	125.718	0.504601	3.17979				16.339	2.607	0.717993	0.790446
			163.419	17.514	1.03763	0.96922			95.112	61.479	0.603912	3.40223			90.33	18.037	0.573549	0.998163				71.881	33.005	0.79316	0.834798			17.541	139.37	0.193554	3.5251			17.574	51.007	0.193918	1.29012				16.392	2.507	0.720322	0.760126
			184.873	18.289	1.17385	1.01211			26.896	85.562	0.170776	4.73498			63.183	16.192	0.401179	0.896061				55.897	30.619	0.616787	0.774449			10.905	75.74	0.12033	1.9157			33.257	42.551	0.366969	1.07625				11.88	1.973	0.522049	0.598216
			144.138	16.934	0.915202	0.937123			73.255	41.011	0.465131	2.26954			96.358	14.854	0.611823	0.822016				86.324	33.271	0.952529	0.841526			29.313	121.068	0.32345	3.06218			28.687	108.977	0.316542	2.75636				11.37	2.31	0.499638	0.700395
			162.673	18.765	1.03289	1.03845			36.361	56.913	0.230874	3.14955			98.384	16.096	0.624688	0.890748				46.85	33.239	0.516959	0.840716			24.843	194.137	0.274126	4.91032			38.674	110.083	0.426742	2.78434				16.935	2.512	0.744183	0.761642
			165.826	17.055	1.05291	0.943819			69.113	138.306	0.438832	7.65382			86.487	14.985	0.549148	0.829266				89.011	40.323	0.982178	1.01989			40.508	173.527	0.446979	4.38903			40.771	38.464	0.449881	0.972873				14.526	2.336	0.638323	0.708278
			160.586	15.729	1.01964	0.870438			53.244	46.599	0.338072	2.57878			93.659	16.296	0.594686	0.901816				76.169	36.018	0.840475	0.911006			21.526	177.374	0.237525	4.48633			21.678	80.573	0.239203	2.03794				11.163	2.367	0.490541	0.717677
			165.685	17.538	1.05201	0.970548			59.075	69.843	0.375096	3.86509			137.605	15.911	0.873721	0.88051				103.196	46.039	1.1387	1.16447			21.24	175.921	0.23437	4.44958			30.242	117.208	0.333701	2.96455				17.317	2.25	0.76097	0.682203
			173.844	18.618	1.10382	1.03031			58.798	78.14	0.373337	4.32425			101.73	19.004	0.645933	1.05168				63.841	29.131	0.704444	0.736812			68.977	81.888	0.761116	2.0712			18.286	167.003	0.201774	4.22402				16.948	2.582	0.744755	0.782866
			174.612	15.411	1.1087	0.85284			57.623	105.471	0.365876	5.83674			65.321	15.713	0.414755	0.869553				38.465	28.58	0.424436	0.722876			24.522	201.611	0.270584	5.09936			5.801	8.35	0.0640103	0.211197				9.056	1.638	0.397952	0.496644
			159.039	18.203	1.00982	1.00735			102.493	182.066	0.650778	10.0755			45.257	13.762	0.287359	0.761585				75.525	43.364	0.833369	1.09681			35.703	171.921	0.393959	4.34841			44.739	51.268	0.493666	1.29673				18.287	2.624	0.803595	0.7956
			82.911	12.265	0.526442	0.678742			84.112	166.25	0.534068	9.20023			109.565	16.384	0.695681	0.906686				82.137	44.031	0.906328	1.11368			80.516	117.001	0.888442	2.95931			31.813	93.166	0.351036	2.35645				17.012	2.769	0.747567	0.839564
			75.466	13.205	0.47917	0.730761			2.302	7.073	0.0146165	0.391418			108.408	15.476	0.688335	0.856437				85.711	39.724	0.945765	1.00474			73.129	117.232	0.806931	2.96516			91.026	77.407	1.00441	1.95786				6.136	1.686	0.269637	0.511197
			195.142	17.042	1.23905	0.9431			49.224	75.986	0.312547	4.20504			106.809	15.447	0.678182	0.854833				57	40.335	0.628958	1.0202			26.333	176.236	0.290568	4.45755			52.087	90.136	0.574746	2.27982				17.471	2.671	0.767737	0.809851
			150.45	18.043	0.95528	0.998495			69.742	92.852	0.442826	5.1384			97.995	14.756	0.622218	0.816593				71.755	44.305	0.79177	1.12061			71.415	172.115	0.788018	4.35332			69.412	82.805	0.765916	2.09439				20.557	2.938	0.903347	0.890805
			152.921	17.75	0.970969	0.98228			50.479	58.685	0.320516	3.24761			113.185	21.704	0.718666	1.20109				96.106	46.976	1.06047	1.18817			78.13	98.42	0.862114	2.48934			76.69	82.044	0.846224	2.07514				10.562	1.935	0.464131	0.586694
			154.456	16.528	0.980716	0.914655			60.315	96.353	0.382969	5.33215			68.23	11.72	0.433225	0.648582				85.888	41.093	0.947718	1.03937			21.827	208.973	0.240847	5.28557			44.553	107.741	0.491613	2.7251				16.403	2.824	0.720805	0.85624
			151.073	16.281	0.959235	0.900986			79.648	94.585	0.505724	5.23431			88.87	17.9	0.564279	0.990581				95.176	47.033	1.05021	1.18961			106.219	132.684	1.17206	3.35599			68.123	91.835	0.751693	2.32279				10.13	2.106	0.445148	0.638542
			152.452	17.731	0.967991	0.981229			35.088	67.527	0.222791	3.73693			77.979	13.652	0.495126	0.755498				133.202	47.682	1.4698	1.20602			28.317	175.501	0.31246	4.43896			56.437	46.972	0.622746	1.18807				15.99	2.798	0.702657	0.848357
			172.24	18.298	1.09363	1.01261			59.962	178.807	0.380728	9.89513			119.929	15.978	0.761487	0.884218				79.413	35.483	0.876271	0.897474			54.973	123.499	0.606591	3.12367			71.549	102.4	0.789497	2.59001				17.541	2.63	0.770813	0.797419
			146.673	16.493	0.931298	0.912718			41.647	114.414	0.264437	6.33164			93.427	17.482	0.593213	0.967449				97.378	38.337	1.0745	0.96966			69.984	202.396	0.772228	5.11922			66.322	82.602	0.73182	2.08926				19.787	2.59	0.86951	0.785291
			148.078	18.182	0.940219	1.00619			6.882	14.279	0.0436971	0.790196			45.023	16.205	0.285873	0.89678				95.635	36.126	1.05527	0.913738			26.485	118.075	0.292245	2.98648			46.598	61.182	0.514179	1.54748				23.025	2.8	1.0118	0.848964
			90.911	14.018	0.577238	0.775752			63.573	147.688	0.403656	8.17301			115.984	16.714	0.736438	0.924948				105.876	37.741	1.16827	0.954586			4.536	20.229	0.0500518	0.511654			36.291	68.128	0.400448	1.72317				16.224	2.846	0.71294	0.862911
			80.976	12.649	0.514156	0.699992			29.458	79.008	0.187043	4.37228			133.769	16.42	0.849364	0.908678				103.81	41.1	1.14548	1.03955			80.644	119.278	0.889854	3.01691			67.969	76.834	0.749994	1.94337				10.043	1.738	0.441325	0.526964
			141.971	15.689	0.901442	0.868225			40.658	92.686	0.258157	5.12922			204.692	17.882	1.29969	0.989585				111.053	46.744	1.2254	1.1823			26.948	164.584	0.297354	4.16283			69.993	81.136	0.772327	2.05218				16.942	3.543	0.744491	1.07424
			167.516	17.751	1.06364	0.982335			79.174	144.312	0.502714	7.98619			117.246	16.272	0.744451	0.900488				109.549	40.24	1.2088	1.01779			28.443	158.673	0.31385	4.01333			26.737	68.92	0.295025	1.7432				18.148	4.391	0.797487	1.33136
			84.291	12.355	0.535204	0.683722			3.124	7.921	0.0198358	0.438346			108.057	15.289	0.686106	0.846089				102.838	43.789	1.13475	1.10756			92.636	76.812	1.02218	1.94281			38.316	77.987	0.422792	1.97253				14.422	3.474	0.633753	1.05332
			159.901	16.968	1.01529	0.939004			37.121	91.132	0.235699	5.04322			140.843	16.454	0.89428	0.91056				57.399	30.353	0.633361	0.767721			27.912	168.775	0.307991	4.26884			81.953	82.826	0.904298	2.09492				13.192	3.59	0.579703	1.08849
			178.051	17.824	1.13053	0.986375			83.08	79.652	0.527515	4.40792			124.377	15.625	0.78973	0.864683				86.944	35.008	0.95937	0.88546			25.513	117.844	0.281519	2.98064			78.14	78.005	0.862224	1.97299				15.152	3.805	0.665832	1.15368
			130.504	16.257	0.828633	0.899658			46.349	120.796	0.294292	6.68482			106.056	22.184	0.673401	1.22766				102.798	35.916	1.13431	0.908426			69.695	116.508	0.769039	2.94685			82.855	44.492	0.914251	1.12534				16.276	3.519	0.715225	1.06697
			138.71	18.245	0.880737	1.00967			56.482	152.698	0.358631	8.45026			118.815	15.295	0.754414	0.846421				103.603	40.915	1.14319	1.03487			88.01	75.279	0.971133	1.90404			60.352	56.486	0.665945	1.4287				7.175	2.559	0.315295	0.775892
			115.237	15.718	0.731695	0.86983			41.076	85.702	0.260811	4.74272			129.009	14.602	0.81914	0.808071				100.117	37.898	1.10473	0.958557			63.105	104.63	0.696323	2.64641			44.38	51.688	0.489704	1.30735				2.877	2.087	0.126425	0.632781
			141.309	16.02	0.897239	0.886542			60.351	112.134	0.383198	6.20546			101.858	14.731	0.646746	0.815209				49.825	23.088	0.549786	0.583966			95.928	83.745	1.0585	2.11817			39.528	73.937	0.436166	1.87009				15.516	3.387	0.681828	1.02694
			82.753	11.672	0.525439	0.645925			75.554	123.096	0.479729	6.8121			85.374	14.813	0.542081	0.819747				108.534	39.946	1.1976	1.01036			51.062	116.087	0.563436	2.9362			32.341	75.523	0.356862	1.91021				7.132	2.542	0.313405	0.770738
			157.798	18.328	1.00194	1.01427			85.709	78.504	0.544208	4.34439			38.264	14.966	0.242957	0.828214				90.371	32.878	0.997185	0.831586			32.354	121.374	0.357005	3.06992			28.948	35.427	0.319422	0.896058				12.591	3.282	0.553293	0.995107
			146.326	16.28	0.929094	0.900931			85.513	76.278	0.542963	4.2212			47.917	11.459	0.304248	0.634138				112.04	43.03	1.23629	1.08836			79.349	61.167	0.875565	1.5471			80.003	55.074	0.882781	1.39299				13.452	2.991	0.591128	0.906875
			166.893	18.752	1.05968	1.03773			44.781	27.614	0.284336	1.52815			66.155	15.35	0.42005	0.849465				82.636	35.733	0.911834	0.903797			24.659	191.095	0.272096	4.83338			66.114	74.38	0.729525	1.8813				16.407	4.254	0.720981	1.28982
			141.701	16.435	0.899728	0.909508			47.696	78.052	0.302845	4.31938			152.568	17.269	0.968728	0.955662				86.545	34.066	0.954968	0.861634			47.469	117.98	0.52379	2.98408			72.618	69.237	0.801292	1.75122				11.599	2.851	0.509701	0.864427
			158.312	17.999	1.0052	0.99606			52.623	127.432	0.334129	7.05205			100.048	15.787	0.635253	0.873648				63.459	28.365	0.700229	0.717438			51.302	105.66	0.566084	2.67247			60.859	79.492	0.671539	2.0106				10.61	2.924	0.466241	0.88656
			174.695	18.625	1.10922	1.0307			128.631	159.252	0.81674	8.81296			70.521	15.067	0.447772	0.833804				91.64	38.263	1.01119	0.967789			53.675	83.898	0.592269	2.12204			64.528	69.459	0.712024	1.75683				10.559	2.406	0.464	0.729502
			180.495	19.684	1.14605	1.08931			68.736	185.645	0.436438	10.2735			118.047	20.389	0.749537	1.12832				96.175	39.832	1.06123	1.00747			49.469	112.322	0.545858	2.84097			52.212	72.443	0.576125	1.83231				14.069	2.793	0.618241	0.846841
			160.086	16.723	1.01646	0.925446			52.051	110.945	0.330497	6.13967			116.491	16.746	0.739658	0.926719				71.923	29.19	0.793623	0.738305			35.383	148.506	0.390428	3.75617			52.216	83.136	0.57617	2.10276				13.252	3.064	0.582339	0.929009
			179.821	18.607	1.14177	1.02971			83.155	92.23	0.527991	5.10398			109.717	16.141	0.696646	0.893238				88.579	31.015	0.977412	0.784465			51.266	99.44	0.565687	2.51514			57.886	47.813	0.638734	1.20934				11.741	2.982	0.515941	0.904146
			186.289	20.331	1.18284	1.12511			37.456	70.214	0.237826	3.88562			109.351	16.372	0.694322	0.906022				82.566	33.012	0.911062	0.834975			41.161	83.226	0.454185	2.10504			32.276	75.764	0.356145	1.9163				5.872	1.923	0.258036	0.583056
			159.769	16.824	1.01445	0.931035			38.814	101.087	0.246449	5.59413			8.517	15.134	0.0540785	0.837511				101.269	43.489	1.11744	1.09997			20.011	162.527	0.220808	4.11081			68.065	63.315	0.751053	1.60143				13.595	3.31	0.597412	1.0036
			152.589	18.469	0.968861	1.02207			48.538	106.613	0.308191	5.89993			105.71	16.625	0.671204	0.920023				101.787	36.796	1.12315	0.930684			24.261	169.739	0.267704	4.29322			49.144	58.737	0.542272	1.48564				8.211	2.579	0.36082	0.781956
			135.484	17.895	0.860253	0.990304			84.263	180.419	0.535026	9.98434			98.796	18.521	0.627304	1.02495				83.782	31.598	0.92448	0.79921			25.376	189.113	0.280008	4.78325			62.941	50.317	0.694513	1.27267				7.896	2.363	0.346978	0.716465
			139.263	14.429	0.884248	0.798497			57.647	92.072	0.366029	5.09524			96.708	19.848	0.614046	1.09838				90.578	36.308	0.999469	0.918341			21.929	194.933	0.241972	4.93045			98.919	51.248	1.09151	1.29622				16.457	4.253	0.723178	1.28951
			146.069	17.916	0.927463	0.991466			6.063	13.668	0.0384969	0.756383			79.701	20.592	0.50606	1.13956				102.076	36.064	1.12634	0.912169			23.743	181.275	0.261989	4.585			92.684	56.66	1.02271	1.43311				14.356	3.553	0.630853	1.07727
			170.109	18.893	1.0801	1.04553			83.004	202.159	0.527032	11.1874			68.849	19.101	0.437156	1.05704				92.159	35.892	1.01691	0.907819			27.711	219.749	0.305773	5.55813			57.089	105.608	0.62994	2.67115				5.416	2.025	0.237998	0.613983
			185.223	18.111	1.17607	1.00226			64.662	89.711	0.41057	4.96458			77.578	18.73	0.49258	1.03651				73.66	28.504	0.81279	0.720954			40.507	113.052	0.446968	2.85943			62.734	68.214	0.692229	1.72534				5.459	1.801	0.239888	0.546065
			114.116	18.531	0.724578	1.0255			58.45	48.647	0.371127	2.69211			107.174	18.108	0.680499	1.00209				100.554	38.868	1.10955	0.983091			30.511	153.724	0.336669	3.88815			54.148	52.337	0.597488	1.32376				5.063	1.873	0.222486	0.567896
			100.35	14.258	0.637171	0.789034			58.447	108.92	0.371108	6.0276			149.774	16.392	0.950987	0.907129				67.316	27.134	0.742788	0.686302			80.733	153.094	0.890836	3.87222			45.981	63.644	0.50737	1.60975				13.78	3.597	0.605542	1.09061
			171.941	19.174	1.09174	1.06108			91.107	129.147	0.578482	7.14696			55.251	19.314	0.350815	1.06883				88.477	34.603	0.976286	0.875216			90.264	56.583	0.996004	1.43116			38.507	99.824	0.4249	2.52486				12.941	3.091	0.568673	0.937195
			169.696	18.474	1.07748	1.02235			3.896	11.196	0.0247376	0.619583			67.965	19.745	0.431543	1.09268				82.559	31.081	0.910985	0.786134			49.782	138.828	0.549312	3.51139			40.925	115.308	0.451581	2.91649				10.35	2.605	0.454815	0.789839
			151.364	17.757	0.961083	0.982667			121.123	184.853	0.769068	10.2297			80.263	20.97	0.509629	1.16047				118.704	38.041	1.30982	0.962174			51.997	143.346	0.573753	3.62566			11.26	87.566	0.124247	2.21481				11.388	1.762	0.500429	0.534241
			148.734	17.022	0.944384	0.941993			78.798	120.318	0.500327	6.65836			68.208	18.575	0.433086	1.02794				73.868	28.48	0.815085	0.720347			33.584	136.083	0.370578	3.44196			58.523	67.311	0.645763	1.7025				14.198	3.706	0.62391	1.12366
			153.715	17.172	0.976011	0.950294			67.867	61.112	0.43092	3.38192			105.543	19.241	0.670143	1.06479				96.401	35.754	1.06372	0.904328			20.19	162.49	0.222784	4.10987			47.121	83.212	0.51995	2.10469				4.715	1.754	0.207194	0.531815
			15.001	14.214	0.0952486	0.786599			52.08	175.37	0.330681	9.70493			63.583	19.824	0.403719	1.09705				89.137	31.939	0.983569	0.807835			27.232	109.592	0.300487	2.77192			51.624	73.067	0.569637	1.84809				10.27	2.962	0.4513	0.898082
			169.264	18.839	1.07474	1.04254			89.16	85.022	0.56612	4.70509			69.232	18.498	0.439587	1.02367				103.787	40.22	1.14522	1.01729			38.01	205.311	0.419416	5.19295			45.713	101.948	0.504413	2.57858				5.599	1.995	0.24604	0.604887
			139.022	18.01	0.882718	0.996668			105.433	124.992	0.669445	6.91702			84.679	17.538	0.537668	0.970548				116.543	49.618	1.28598	1.25499			76.685	137.959	0.846169	3.48941			41.202	88.913	0.454637	2.24888				12.475	3.129	0.548195	0.948717
			155.976	17.139	0.990367	0.948467			179.776	111.576	1.14148	6.17458			45.402	23.687	0.288279	1.31083				78.23	32.796	0.863217	0.829512			31.885	102.396	0.35183	2.58991			46.004	92.602	0.507624	2.34219				12.555	2.857	0.551711	0.866246
			175.011	17.973	1.11123	0.994621			38.609	167.312	0.245147	9.259			44.888	19.516	0.285016	1.08001				90.613	33.282	0.999855	0.841804			47.924	148.903	0.52881	3.76621			34.887	89.482	0.384955	2.26327				13.712	3.075	0.602553	0.932344
			139.872	17.846	0.888115	0.987593			34.271	149.731	0.217603	8.28607			52.868	20.716	0.335684	1.14642				74.833	31.928	0.825733	0.807557			32.362	100.854	0.357094	2.55091			12.68	75.945	0.139916	1.92088				10.406	2.64	0.457276	0.800451
			181.001	17.962	1.14926	0.994012			70.737	99.072	0.449143	5.48262			42.495	19.017	0.269821	1.0524				58.245	28.882	0.642696	0.730515			64.936	171.476	0.716526	4.33715			44.391	93.742	0.489826	2.37102				15.496	3.929	0.680949	1.19128
			169.538	18.815	1.07648	1.04122			59.848	164.466	0.380004	9.1015			61.478	25.874	0.390354	1.43186				88.524	33.301	0.976805	0.842285			47.674	185.414	0.526052	4.68969			34.112	90.151	0.376404	2.2802				15.508	3.395	0.681476	1.02937
			160.807	18.207	1.02104	1.00757			72.732	113.146	0.461811	6.26147			55.689	18.424	0.353596	1.01958				95.62	33.393	1.0551	0.844612			58.62	150.673	0.646834	3.81098			39.658	72.367	0.4376	1.83038				14.045	3.427	0.617187	1.03907
			187.451	20.061	1.19022	1.11017			86.496	115.455	0.549205	6.38925			40.9	23.03	0.259694	1.27447				90.554	39.456	0.999204	0.997963			32.362	116.532	0.357094	2.94745			43.565	89.26	0.480711	2.25766				11.417	3.181	0.501703	0.964483
			170.57	18.374	1.08303	1.01681			71.427	105.575	0.453525	5.84249			55.18	19.545	0.350364	1.08161				82.331	31.102	0.908469	0.786665			34.057	102.689	0.375797	2.59732			27.288	86.393	0.301105	2.18514				12.314	3.528	0.54112	1.06969
			148.429	18.63	0.942447	1.03098			84.165	141.646	0.534404	7.83865			166.245	18.741	1.05557	1.03712				74.762	28.68	0.82495	0.725405			57.273	142.385	0.63197	3.60135			35.732	85.901	0.394279	2.1727				26.29	3.927	1.15528	1.19067
			167.59	17.948	1.06411	0.993237			96.54	104.514	0.612979	5.78378			113.383	17.834	0.719923	0.986929				86.728	31.08	0.956987	0.786109			29.018	117.394	0.320195	2.96925			35.912	65.243	0.396266	1.6502				27.999	14.674	1.23037	4.44918
			171.046	19.613	1.08605	1.08538			94.374	151.688	0.599226	8.39437			114.236	19.991	0.72534	1.1063				75.095	29.931	0.828624	0.757047			32.304	101.019	0.356454	2.55508			46.499	96.218	0.513086	2.43365				29.151	4.214	1.281	1.27769
			160.431	20.677	1.01865	1.14426			79.005	95.054	0.501641	5.26026			163.969	18.999	1.04112	1.0514				87.694	32.582	0.967646	0.824099			109.42	114.332	1.20738	2.89181			34.661	93.982	0.382462	2.37709				28.359	4.271	1.24619	1.29497
			167.777	18.198	1.0653	1.00707			50.697	107.85	0.3219	5.96839			183.657	15.349	1.16613	0.849409				115.74	43.577	1.27712	1.1022			24.222	92.422	0.267274	2.33764			34.865	88.096	0.384713	2.22822				25.451	6.105	1.11841	1.85104
			191.845	17.772	1.21812	0.983497			63.953	189.897	0.406068	10.5088			123.823	17.128	0.786212	0.947859				96.072	41.115	1.06009	1.03992			41.371	110.478	0.456502	2.79433			29.078	95.756	0.320857	2.42196				26.939	4.842	1.18379	1.4681
			166.225	18.832	1.05544	1.04216			168.084	124.267	1.06725	6.8769			111.85	23.947	0.71019	1.32522				72.928	30.62	0.804713	0.774474			42.05	109.909	0.463994	2.77994			3.078	8.713	0.0339637	0.220379				28.064	4.47	1.23323	1.35531
			161.608	19.33	1.02613	1.06972			10.329	7.876	0.0655838	0.435856			110.005	14.958	0.698475	0.827772				73.975	27.5	0.816266	0.695559			34.375	139.549	0.379306	3.52962			3.535	12.872	0.0390064	0.325572				25.303	4.551	1.1119	1.37987
			143.851	18.484	0.913379	1.0229			71.847	132.982	0.456191	7.35919			83.213	24.353	0.52836	1.34769				88.076	37.585	0.971861	0.95064			22.754	90.708	0.251076	2.29428			27.436	100.024	0.302738	2.52991				30.332	5.874	1.33289	1.781
			179.261	18.021	1.13821	0.997277			122.067	59.991	0.775062	3.31989			116.895	16.541	0.742223	0.915374				76.428	34.236	0.843333	0.865934			47.777	115.828	0.527188	2.92965			42.962	63.868	0.474058	1.61542				21.456	4.315	0.942852	1.30831
			146.421	17.366	0.929698	0.96103			74.511	79.661	0.473106	4.40842			142.594	18.034	0.905398	0.997997				109.775	40.917	1.2113	1.03492			40.556	127.99	0.447509	3.23726			36.555	68.067	0.403361	1.72162				22.469	4.749	0.987367	1.4399
			167.565	19.402	1.06395	1.0737			9.702	8.345	0.0616027	0.46181			104.216	15.731	0.661718	0.870549				79.285	34.618	0.874858	0.875596			36.454	104.645	0.402246	2.64679			41.648	103.443	0.459559	2.61639				26.607	5.366	1.16921	1.62698
			166.285	19.477	1.05582	1.07785			41.531	82.959	0.2637	4.59093			132.626	15.15	0.842107	0.838397				62.588	27.943	0.690618	0.706764			49.799	78.081	0.5495	1.97491			72.774	112.402	0.803014	2.84299				27.134	4.923	1.19236	1.49266
			182.982	20.979	1.16184	1.16097			95.878	198.636	0.608776	10.9925			127.559	16.314	0.809934	0.902812				78.516	35.193	0.866373	0.890139			22.059	97.897	0.243407	2.47612			32.248	78.995	0.355836	1.99803				22.203	4.546	0.975678	1.37835
			134.971	21.81	0.856996	1.20696			11.7	40.534	0.074289	2.24314			103.849	17.272	0.659387	0.955828				68.7	28.236	0.75806	0.714175			33.195	115.631	0.366285	2.92466			38.43	99.036	0.42405	2.50492				28.594	5.011	1.25652	1.51934
			170.826	18.111	1.08466	1.00226			88.126	94.456	0.559555	5.22717			72.281	16.309	0.458947	0.902535				71.619	33.404	0.790269	0.84489			76.446	118.671	0.843532	3.00155			26.982	55.998	0.297729	1.41636				22.815	4.611	1.00257	1.39806
			177.581	19.152	1.12755	1.05987			89.237	161.297	0.566609	8.92613			116.691	15.637	0.740928	0.865347				63.157	23.835	0.696896	0.60286			25.658	148.537	0.283119	3.75696			30.331	75.571	0.334683	1.91142				30.165	5.318	1.32556	1.61242
			154.346	18.634	0.980017	1.0312			93.185	87.559	0.591677	4.84549			136.58	17.545	0.867212	0.970935				79.038	30.889	0.872133	0.781278			86.514	111.685	0.954626	2.82486			92.667	90.774	1.02252	2.29595				36.169	5.234	1.58939	1.58696
			177.727	18.06	1.12847	0.999435			85.4	59.578	0.542246	3.29703			146.77	16.745	0.931914	0.926664				79.001	35.538	0.871725	0.898865			23.68	144.867	0.261293	3.66413			13.588	47.277	0.149935	1.19578				30.697	4.954	1.34893	1.50206
			89.342	15.303	0.567276	0.846864			55.409	90.386	0.351819	5.00194			161.517	18.91	1.02555	1.04647				84.004	34.875	0.926929	0.882096			38.829	155.269	0.428453	3.92723			27.68	113.506	0.305431	2.87092				34.492	5.526	1.5157	1.67549
			90.866	15.153	0.576952	0.838563			90.311	215.584	0.573428	11.9304			125.995	17.115	0.800003	0.947139				96.263	39.629	1.0622	1.00234			22.017	126.377	0.242943	3.19646			43.605	86.936	0.481153	2.19888				33.096	5.313	1.45435	1.61091
			146.456	17.419	0.92992	0.963963			68.438	106.646	0.434546	5.90176			93.909	17.422	0.596274	0.964129				59.233	24.464	0.653598	0.61877			45.156	119.24	0.498267	3.01595			24.81	124.51	0.273762	3.14924				30.629	4.654	1.34595	1.4111
			148.226	17.643	0.941158	0.976359			101.917	143.976	0.64712	7.96759			162.277	18.499	1.03038	1.02373				81.282	29.401	0.896894	0.743642			73.942	127.636	0.815902	3.22831			15.148	153.868	0.167148	3.89179				28.731	5.057	1.26254	1.53329
			181.389	19.187	1.15173	1.0618			81.678	107.337	0.518613	5.94			87.839	16.151	0.557732	0.893792				74.297	28.56	0.819819	0.72237			39.762	146.591	0.438748	3.70774			11.669	66.458	0.12876	1.68093				35.68	5.566	1.5679	1.68762
			149.638	19.246	0.950124	1.06507			3.532	10.421	0.0224264	0.576695			89.238	18.568	0.566615	1.02755				102.044	43.821	1.12599	1.10837			74.994	102.964	0.82751	2.60428			7.889	41.642	0.08705	1.05325				30.849	4.677	1.35561	1.41807
			173.359	19.447	1.10074	1.07619			40.347	126.025	0.256183	6.97419			83.716	14.451	0.531553	0.799714				56.437	24.716	0.622746	0.625144			25.542	116.217	0.281839	2.93948			12.024	77.5	0.132677	1.96021				30.401	4.737	1.33593	1.43626
			174.752	20.009	1.10958	1.10729			63.409	109.13	0.402614	6.03922			94.215	15.584	0.598217	0.862414				70.912	31.575	0.782468	0.798629			42.528	109.814	0.469269	2.77753			24.373	77.759	0.26894	1.96676				30.492	4.575	1.33993	1.38715
			163.912	19.261	1.04076	1.0659			84.547	50.795	0.53683	2.81098			104.051	13.522	0.66067	0.748304				65.849	29.256	0.726601	0.739974			53.574	150.463	0.591154	3.80567			65.273	65.274	0.720245	1.65098				34.113	4.792	1.49905	1.45294
			69.821	12.334	0.443327	0.68256			118.018	98.697	0.749353	5.46186			69.565	13.575	0.441702	0.751237				65.329	30.991	0.720863	0.783858			32.361	95.892	0.357083	2.4254			34.24	60.18	0.377816	1.52214				34.5	4.976	1.51605	1.50873
			159.803	19.227	1.01467	1.06402			98.417	99.175	0.624897	5.48832			143.43	20.727	0.910706	1.14703				61.816	25.862	0.682099	0.654129			33.283	134.738	0.367256	3.40794			25.383	75.926	0.280085	1.9204				26.3	4.251	1.15571	1.28891
			175.26	19.147	1.11281	1.05959			59.325	192.952	0.376683	10.6779			84.606	21.087	0.537204	1.16695				58.414	28.046	0.64456	0.709369			46.193	111.188	0.50971	2.81229			14.74	126.513	0.162646	3.1999				32.504	4.128	1.42834	1.25161
			178.86	14.77	1.13567	0.817368			109.129	133.79	0.692913	7.4039			98.645	16.179	0.626345	0.895341				73.66	29.262	0.81279	0.740126			13.809	159.131	0.152373	4.02491			21.657	106.487	0.238971	2.69338				33.863	4.164	1.48806	1.26253
			194.136	21.376	1.23266	1.18294			85.752	93.829	0.544481	5.19247			81.598	15.902	0.518105	0.880012				71.329	30.325	0.787069	0.767012			46.404	152.36	0.512038	3.85365			11.741	70.565	0.129554	1.78481				34.108	5.577	1.49883	1.69095
			168.424	19.169	1.06941	1.06081			89.911	40.188	0.570888	2.22399			10.704	12.896	0.0679649	0.713661				73.673	34.498	0.812934	0.87256			33.688	158.571	0.371725	4.01075			13.434	63.105	0.148235	1.59612				34.922	3.923	1.5346	1.18946
			168.551	18.659	1.07021	1.03258			70.88	94.7	0.450051	5.24067			93.39	12.522	0.592978	0.692964				72.598	32.172	0.801072	0.813729			33.45	122.117	0.369099	3.08871			8.804	90.027	0.0971464	2.27706				34.996	5.342	1.53785	1.6197
			167.805	17.314	1.06547	0.958152			128.817	131.18	0.817921	7.25946			86.496	14.572	0.549205	0.80641				74.131	33.599	0.817987	0.849822			20.245	169.587	0.22339	4.28938			9.999	61.917	0.110332	1.56607				33.261	5.025	1.46161	1.52359
			181.094	19.599	1.14985	1.0846			119.696	134.855	0.760008	7.46284			89.124	14.421	0.565891	0.798054				92.142	36.468	1.01673	0.922388			47.493	119.847	0.524054	3.0313			7.666	132.46	0.0845893	3.35032				26.964	5.291	1.18489	1.60424
			172.137	17.57	1.09298	0.972319			43.7	184.336	0.277472	10.2011			126.114	20.058	0.800759	1.11				106.894	36.722	1.17951	0.928812			30.442	155.651	0.335908	3.93689			18.631	54.151	0.205581	1.36965				28.949	4.86	1.27212	1.47356
			155.963	18.07	0.990284	0.999989			198.568	123.709	1.2608	6.84602			65.01	12.891	0.41278	0.713384				76.601	33.597	0.845242	0.849771			31.814	116.736	0.351047	2.95261			12.243	71.187	0.135094	1.80054				36.524	5.021	1.60499	1.52237
[truncated: 614 more rows]
[truncated: 17 more columns]
