# Supplementary material for: An in vitro stem cell model of human epiblast and yolk sac interaction
Source: eLife. 2021 Aug 17;10:e63930. doi: 10.7554/eLife.63930 (PMC8370770; doi:10.7554/eLife.63930)
Supplement: Figure 6—source data 1. [file elife-63930-fig6-data1.xlsx]

## Sheet: F6C
GATA6 and T level analysis in hESCs cultured in YSLC CM in 3D
units= fluorescence intensity (a.u.)
			Exp 1	19.5494	1			9.43381	0.482564			Exp 2	42.5263	1			15.1158	0.355445			Exp 3	57.9951	1			25.2813	0.435921
			Control	GATA6	rel GATA6		+ YSLC CM	GATA6	rel GATA6			Control	GATA6	rel GATA6		+ YSLC CM	GATA6	rel GATA6			Control	GATA6	rel GATA6		+ YSLC CM	GATA6	rel GATA6					GATA6							Exp 1	27.2487	1			23.6828	0.869136			Exp 2	64.274
				5.656	0.289319			4.452	0.227731				38.628	0.908332			19.444	0.457223				14.555	0.25097			18.711	0.322631					hESC	+YSLC CM						Control	T	rel T		+ YSLC CM	T	rel T			Control	T
				6.175	0.315867			1.364	0.0697721				22.444	0.527768			11.55	0.271597				15.769	0.271903			17.918	0.308957				Number of values	2336	1074							27.91	1.02427			17.756	0.651628				45.183
				4.519	0.231159			13.127	0.67148				38.372	0.902312			13	0.305693				107.574	1.85488			19.313	0.333011													36.473	1.33852			3.746	0.137474				47.975
				4.214	0.215557			3.5	0.179034				30.957	0.72795			14.515	0.341318				10.615	0.183033			18.352	0.316441				Minimum	0.03259	0.02124							34.317	1.2594			5.187	0.190358				51.229
				31.915	1.63254			12.726	0.650968				21.882	0.514552			15.934	0.374686				20.883	0.360082			19.347	0.333597				25% Percentile	0.416	0.325							32.095	1.17785			15.754	0.578156				51.973
				43.198	2.20969			13.618	0.696596				36.52	0.858763			12.766	0.300191				16.492	0.284369			22.693	0.391292				Median	0.8492	0.4377							35.414	1.29966			16.302	0.598267				54.085
				43.89	2.24509			15.851	0.81082				37.662	0.885617			15.013	0.353029				93.12	1.60565			17.708	0.305336				75% Percentile	1.348	0.5147							30.689	1.12626			19.5	0.715631				39.97
				38.254	1.95679			9.347	0.478123				54.945	1.29202			16.771	0.394368				44.403	0.765634			23.712	0.408862				Maximum	8.524	7.345							30.657	1.12508			1.19	0.0436718				51.607
				5.48	0.280316			7.913	0.40477				52.646	1.23796			18.388	0.432391				130.564	2.2513			20.021	0.345219													30.028	1.102			17.318	0.635553				50.705
				78.085	3.99425			11.688	0.597872				12.554	0.295206			20.121	0.473143				25.324	0.436658			16.603	0.286283				Mean	1	0.432							42.772	1.56969			13.647	0.500831				48.067
				37.725	1.92973			12.629	0.646006				29.499	0.693665			16.472	0.387337				52.117	0.898646			21.403	0.369049				Std. Deviation	0.7545	0.2733							39.103	1.43504			18.93	0.694712				49.219
				36.974	1.89132			12.786	0.654037				40.287	0.947343			22.756	0.535104				15.38	0.265195			21.693	0.374049				Std. Error of Mean	0.01561	0.008338							39.519	1.45031			18.009	0.660912				50.882
				7.398	0.378427			11.493	0.587897				35.594	0.836988			14.821	0.348514				64.662	1.11496			18.815	0.324424													46.218	1.69615			17.565	0.644618				2.614
				7.407	0.378887			10.806	0.552755				42.516	0.999758			13.661	0.321237				10.56	0.182085			14.843	0.255936				Lower 95% CI of mean	0.9694	0.4157							32.199	1.18167			18.515	0.679482				48.25
				7.878	0.40298			8.977	0.459197				40.027	0.941229			11.162	0.262473				17.75	0.306061			14.757	0.254453				Upper 95% CI of mean	1.031	0.4484							29.466	1.08137			19.655	0.721319				45.627
				6.776	0.34661			10.251	0.524365				32.327	0.760165			15.122	0.355592				72.77	1.25476			18.907	0.326011													31.935	1.17198			19.088	0.700511				58.671
				7.372	0.377097			11.811	0.604163				38.166	0.897468			12.425	0.292172				65.228	1.12472			16.14	0.2783				Sum	2336	464							51.809	1.90134			17.214	0.631737				46.904
				6.436	0.329218			8.503	0.434951				34.414	0.809241			11.497	0.27035				58.303	1.00531			18.684	0.322165													32.774	1.20277			18.499	0.678895				52.843
				166.636	8.52386			11.047	0.565083				35.863	0.843314			14.254	0.335181				130.272	2.24626			17.859	0.30794				D'Agostino & Pearson normality test									31.146	1.14303			20.556	0.754385				44.027
				1.583	0.0809746			10.907	0.557921				33.129	0.779024			14.479	0.340472				21.271	0.366773			22.094	0.380964				K2	1095	2213							28.508	1.04622			21.927	0.804699				45.39
				42.549	2.17649			10.744	0.549583				44.685	1.05076			14.182	0.333488				17.044	0.293887			13.464	0.232158				P value	<0.0001	<0.0001							29.539	1.08405			23.481	0.861729				45.379
				70.238	3.59286			15.476	0.791638				35.53	0.835483			12.444	0.292619				158.372	2.73078			24.084	0.415277				Passed normality test (alpha=0.05)?	No	No							56.736	2.08215			21.426	0.786313				50.107
				158.885	8.12738			1.054	0.0539148				26.543	0.624155			12.578	0.29577				53.696	0.925872			11.351	0.195724				P value summary	****	****							32.765	1.20244			24.69	0.906098				45.336
				7.092	0.362774			12.58	0.6435				37.09	0.872166			14.79	0.347785				19.226	0.331511			14.24	0.245538													34.097	1.25133			21.224	0.7789				56.555
				7.199	0.368248			12.679	0.648564				38.76	0.911436			14.152	0.332782				8.799	0.15172			20.321	0.350392													23.687	0.869289			17.449	0.640361				46.125
				7.524	0.384872			1.731	0.0885451				46.63	1.0965			11.098	0.260968				11.412	0.196775			18.192	0.313682													22.671	0.832003			17.64	0.64737				48.205
				6.566	0.335868			14.047	0.71854				28.639	0.673442			9.356	0.220005				8.35	0.143978			20.24	0.348995				Column B	+YSLC CM								27.15	0.996378			21.424	0.786239				50.198
				7.534	0.385384			1.822	0.0932				34.644	0.814649			11.75	0.2763				17.506	0.301853			10.28	0.177257				vs.	vs.								21.979	0.806607			20.843	0.764917				46.513
				6.536	0.334333			2.383	0.121897				22.876	0.537926			10.869	0.255583				128.125	2.20924			22.364	0.385619				Column A	hESC								24.588	0.902355			21.886	0.803194				44.249
				12.977	0.663807			4.674	0.239087				55.447	1.30383			10.415	0.244907				14.079	0.242762			18.886	0.325648													23.836	0.874757			18.476	0.678051				53.051
				19.351	0.989854			17.086	0.873993				41.768	0.982169			17.945	0.421974				65.771	1.13408			20.869	0.359841				Mann Whitney test									23.418	0.859417			20.398	0.748586				53.524
				10.602	0.54232			12.807	0.655111				47.734	1.12246			10.251	0.241051				93.572	1.61345			14.362	0.247642				P value	<0.0001								26.019	0.954871			20.346	0.746678				48.592
				6.983	0.357199			18.284	0.935274				26.923	0.633091			16.699	0.392675				9.551	0.164686			15.476	0.26685				Exact or approximate P value?	Approximate								27.289	1.00148			18.507	0.679188				45.028
				6.469	0.330906			14.873	0.760793				57.025	1.34094			15.572	0.366173				12.966	0.223571			14.526	0.25047				P value summary	****								23.067	0.846536			18.147	0.665977				48.363
				7.594	0.388453			3.339	0.170799				31.577	0.742529			16.295	0.383175				54.303	0.936339			24.859	0.42864				Significantly different (P < 0.05)?	Yes								28.103	1.03135			18.133	0.665463				47.157
				7.762	0.397046			15.516	0.793684				38.728	0.910684			9.37	0.220334				57.957	0.999344			9.576	0.165118				One- or two-tailed P value?	Two-tailed								22.273	0.817397			22.104	0.811195				33.037
				8.965	0.458583			15.138	0.774348				27.625	0.649598			12.345	0.290291				11.508	0.198431			20.269	0.349495				Sum of ranks in column A,B	4621574 , 1194182								25.149	0.922943			20.139	0.739081				53.257
				10.355	0.529685			16.317	0.834657				44.448	1.04519			12.896	0.303248				55.754	0.961358			25.274	0.435796				Mann-Whitney U	616907								25.096	0.920998			22.041	0.808883				35.089
				11.313	0.578689			16.635	0.850923				50.108	1.17828			14.787	0.347714				9.479	0.163445			15.514	0.267506													28.665	1.05198			22.509	0.826058				9.1
				8.972	0.458941			15.47	0.791331				53.262	1.25245			13.678	0.321636				15.098	0.260333			22.301	0.384533				Difference between medians									23.715	0.870317			19.98	0.733246				41.138
				11.117	0.568663			14.199	0.726316				14.933	0.351147			12.319	0.28968				30.294	0.522355			13.396	0.230985				Median of column A	0.8492, n=2336								26.046	0.955862			22.654	0.831379				45.845
				12.586	0.643807			14.997	0.767135				79.911	1.8791			10.126	0.238112				118.452	2.04245			14.986	0.258401				Median of column B	0.4377, n=1074								24.604	0.902942			17.409	0.638893				43.018
				10.91	0.558075			12.235	0.625852				46.659	1.09718			10.931	0.257041				27.786	0.47911			13.272	0.228847				Difference: Actual	-0.4115								26.54	0.973992			19.825	0.727558				48.649
				61.91	3.16686			10.53	0.538637				24.936	0.586367			13.352	0.31397				83.9	1.44668			14.306	0.246676				Difference: Hodges-Lehmann	-0.4246								24.957	0.915897			20.541	0.753834				40.51
				57.599	2.94634			12.804	0.654958				51.691	1.21551			14.591	0.343105				91.928	1.5851			15.005	0.258729													24.923	0.914649			24.871	0.912741				43.485
				60.347	3.08691			11.149	0.5703				54.412	1.27949			12.954	0.304612				80.327	1.38507			15.035	0.259246													20.218	0.74198			23.679	0.868996				49.822
				81.474	4.16761			12.327	0.630558				14.921	0.350865			13.53	0.318156				98.219	1.69358			11.125	0.191827													23.962	0.879382			17.181	0.630526				43.476
				86.051	4.40173			14.428	0.73803				49.688	1.16841			10.851	0.25516				71.105	1.22605			14.886	0.256677													25.732	0.944339			3.627	0.133107				50.63
				6.692	0.342313			12.547	0.641812				47.838	1.1249			15.011	0.352982				60.095	1.03621			17.83	0.30744													22.626	0.830352			22.257	0.81681				51.589
				6.396	0.327172			13.015	0.665751				39.627	0.931824			12.979	0.305199				19.159	0.330356			14.088	0.242917													25.346	0.930173			25.362	0.93076				60.495
				7.124	0.364411			9.2	0.470604				48.048	1.12984			10.518	0.247329				16.403	0.282834			16.778	0.289301													4.658	0.170944			22.494	0.825507				46.995
				13.483	0.68969			13.448	0.6879				54.991	1.29311			10.703	0.25168				73.538	1.268			23.009	0.396741													22.56	0.82793			23.838	0.874831				127.744
				15.226	0.778849			10.961	0.560684				17.424	0.409723			9.629	0.226425				77.302	1.33291			21.244	0.366307													76.28	2.7994			23.002	0.844151				52.184
				10.291	0.526411			10.13	0.518176				75.919	1.78523			10.604	0.249352				108.554	1.87178			17.257	0.29756													30.439	1.11708			29.739	1.09139				51.231
				13.615	0.696443			11.546	0.590608				51.163	1.20309			12.402	0.291631				67.185	1.15846			17.328	0.298784													80.188	2.94282			11.384	0.417781				86.333
				12.515	0.640175			13.637	0.697568				83.493	1.96333			11.251	0.264566				31.242	0.538701			14.224	0.245262													23.216	0.852004			24.863	0.912447				79.7
				8.208	0.41986			12.984	0.664165				49.662	1.1678			13.952	0.328079				27.833	0.47992			23.372	0.403													25.138	0.92254			24.339	0.893217				48.243
				11.785	0.602833			9.191	0.470143				44.307	1.04187			14.475	0.340378				14.423	0.248694			17.689	0.305009													21.112	0.774789			25.677	0.94232				55.29
				9.874	0.505081			1.869	0.0956042				51.765	1.21725			10.031	0.235878				21.409	0.369152			18.07	0.311578													22.728	0.834095			17.671	0.648508				44.975
				1.685	0.0861921			9.995	0.51127				58.163	1.3677			11.988	0.281896				18.837	0.324804			18.672	0.321959													22.065	0.809764			22.61	0.829765				53.482
				13.464	0.688719			6.719	0.343694				31.217	0.734064			7.533	0.177137				239.367	4.12737			22.403	0.386292													23.358	0.857215			27.094	0.994323				50.985
				11.441	0.585237			8.298	0.424464				39.331	0.924863			8.357	0.196514				165.403	2.85202			25.895	0.446504													23.247	0.853142			24.482	0.898465				46.89
				1.696	0.0867548			7.923	0.405282				32.776	0.770723			11.679	0.27463				176.53	3.04388			25.304	0.436313													23.801	0.873473			14.336	0.526117				59.956
				13.365	0.683654			9.721	0.497254				41.651	0.979418			13.541	0.318415				40.783	0.703215			24.48	0.422105													23.707	0.870023			28.928	1.06163				48.97
				11.811	0.604163			9.019	0.461345				46.732	1.0989			12.504	0.29403				94.375	1.62729			23.285	0.4015													21.655	0.794717			18.719	0.686969				56.105
				11.982	0.61291			8.597	0.439759				22.119	0.520125			10.81	0.254196				42.65	0.735408			5.789	0.0998189													25.44	0.933623			18.601	0.682638				57.053
				2.73	0.139647			11.014	0.563395				43.192	1.01565			11.012	0.258946				27.307	0.470851			25.994	0.448211													23.537	0.863784			28.03	1.02867				43.139
				3.053	0.156169			10.717	0.548202				30.823	0.724799			12.441	0.292548				25.385	0.43771			22.154	0.381998													47.421	1.7403			16.397	0.601754				51.899
				1.768	0.0904378			7.789	0.398428				33.644	0.791134			11.619	0.273219				16.099	0.277593			16.271	0.280558													40.441	1.48414			18.061	0.662821				43.657
				8.885	0.454491			4.201	0.214892				50.811	1.19481			12.943	0.304353				20.079	0.346219			3.545	0.0611259													39.462	1.44822			19.129	0.702015				57.89
				10.981	0.561707			9.715	0.496947				54.111	1.27241			13.344	0.313782				15.796	0.272368			25.956	0.447555													22.177	0.813874			17.609	0.646233				50.013
				1.726	0.0882894			8.369	0.428096				11.254	0.264636			19.73	0.463948				19.458	0.335511			28.319	0.4883													53.047	1.94677			18.515	0.679482				57.367
				11.319	0.578996			10.141	0.518738				54.78	1.28814			14.757	0.347009				22.426	0.386688			29.56	0.509699													23.921	0.877877			21.529	0.790093				45.44
				11.3	0.578024			9.363	0.478942				43.992	1.03447			11.966	0.281379				16.14	0.2783			29.299	0.505198													28.882	1.05994			19.373	0.71097				49.523
				9.162	0.46866			10.108	0.51705				30.831	0.724987			13.707	0.322318				16.48	0.284162			28.176	0.485835													36.907	1.35445			22.51	0.826095				47.98
				13.004	0.665188			8.305	0.424822				53.505	1.25816			12.945	0.3044				16.484	0.284231			27.652	0.476799													23.815	0.873987			23.832	0.874611				53.076
				14.168	0.72473			10.1	0.516641				52.969	1.24556			11.198	0.263319				18.199	0.313803			31.318	0.540012													27.274	1.00093			19.587	0.718823				48.839
				15.321	0.783709			9.445	0.483136				62.793	1.47657			11.878	0.27931				11.088	0.191189			29.133	0.502336													23.615	0.866647			20.203	0.74143				43.518
				121.263	6.20292			10.653	0.544929				73.131	1.71967			11.719	0.275571				104.828	1.80753			26.018	0.448624													22.977	0.843233			21.48	0.788295				53.781
				84.718	4.33355			8.742	0.447176				61.819	1.45367			9.197	0.216266				80.739	1.39217			30.539	0.526579													32.882	1.20674			20.076	0.736769				57.794
				1.83	0.0936092			11.096	0.567589				26.328	0.619099			7.412	0.174292				13.749	0.237072			26.297	0.453435													48.391	1.7759			23.666	0.868519				57.432
				1.355	0.0693118			9.319	0.476691				62.601	1.47205			9.031	0.212363				112.94	1.94741			28.647	0.493956													22.501	0.825764			20.735	0.760954				56.728
				9.822	0.502421			10.779	0.551374				61.449	1.44496			12.002	0.282225				16.285	0.2808			29.267	0.504647													25.948	0.952266			15.583	0.571881				52.105
				10.261	0.524877			9.009	0.460834				12.605	0.296405			9.454	0.22231				20.368	0.351202			17.463	0.301112													38.929	1.42866			22.602	0.829471				55.491
				9.45	0.483392			9.575	0.489786				73.239	1.72221			8.682	0.204156				95.458	1.64597			31.46	0.54246													53.436	1.96105			26.105	0.958028				58.792
				8.887	0.454593			10.554	0.539864				72.38	1.70201			10.492	0.246718				41.597	0.717251			25.99	0.448142													52.979	1.94428			17.544	0.643847				55.014
				28.55	1.46041			10.636	0.544059				35.421	0.83292			9.417	0.221439				132.22	2.27985			19.013	0.327838													39.086	1.43442			26.886	0.986689				50.118
				64.012	3.27438			10.905	0.557819				3	0.0705446			11.041	0.259628				25.286	0.436003			22.014	0.379584													28.58	1.04886			18.148	0.666014				50.89
				42.272	2.16232			9.992	0.511117				65.667	1.54415			12.478	0.293418				51.802	0.893214			21.648	0.373273													91.638	3.36302			24.769	0.908998				9.596
				8.426	0.431012			11.27	0.57649				51.985	1.22242			7.893	0.185603				15.208	0.262229			15.819	0.272765													59.097	2.1688			17.816	0.653829				53.5
				9.361	0.478839			1.59	0.0813326				48.708	1.14536			20.444	0.480738				62.908	1.08471			30.414	0.524424													26.104	0.957991			16.127	0.591845				53.847
				8.383	0.428812			0.986	0.0504365				29.973	0.704811			26.207	0.616254				10.747	0.185309			25.358	0.437244													47.321	1.73663			17.776	0.652362				58.343
				62.876	3.21627			4.239	0.216836				37.343	0.878116			22.197	0.521959				17.406	0.300129			22.562	0.389033													43.961	1.61332			19.447	0.713686				56.225
				33.88	1.73305			5.585	0.285687				42.37	0.996325			23.543	0.55361				69.06	1.19079			29.231	0.504026													81.669	2.99717			23.413	0.859234				53.164
				9.581	0.490093			6.186	0.31643				91.892	2.16083			30.461	0.716286				61.617	1.06245			22.715	0.391671													26.427	0.969845			6.196	0.227387				61.953
				9.972	0.510094			6.53	0.334026				39.156	0.920748			24.808	0.583357				53.709	0.926096			20.018	0.345167													45.517	1.67043			6.18	0.2268				50.902
				9.415	0.481602			5.85	0.299243				29.563	0.69517			17.007	0.399917				80.999	1.39665			20.803	0.358703													24.425	0.896373			18.404	0.675408				74.567
				8.932	0.456895			6.027	0.308297				37.786	0.888533			28.051	0.659615				21.078	0.363445			25.183	0.434227													31.178	1.1442			16.387	0.601387				57.01
				10.036	0.513367			5.432	0.277861				51.868	1.21967			23.561	0.554034				113.107	1.95029			16.403	0.282834													3.594	0.131896			18.636	0.683923				59.164
				9.724	0.497408			4.028	0.206043				49.754	1.16996			16.964	0.398906				17.068	0.294301			16.878	0.291025													23.31	0.855454			15.683	0.575551				185.184
				6.989	0.357505			2.151	0.110029				57.34	1.34834			30.165	0.709326				160.383	2.76546			15.116	0.260643													22.942	0.841949			17.676	0.648692				237.107
				11.13	0.569328			12.208	0.624471				21.909	0.515187			20.492	0.481867				51.222	0.883213			13.239	0.228278													27.874	1.02295			16.936	0.621534				66.232
				10.729	0.548816			13.386	0.684729				57.967	1.36309			26.742	0.628835				17.581	0.303147			26.362	0.454556													28.223	1.03576			17.316	0.63548				48.331
				12.353	0.631888			13.425	0.686724				28.469	0.669445			19.05	0.447958				7.91	0.136391			23.601	0.406949													28.433	1.04346			4.39	0.161109				89.752
				64.749	3.31208			10.011	0.512089				13.627	0.320437			23.104	0.543287				17.366	0.299439			28.131	0.485059													28.282	1.03792			22.918	0.841068				95.729
				10.544	0.539353			12.063	0.617054				67.189	1.57994			19.515	0.458893				11.264	0.194223			17.451	0.300905													69.376	2.54603			18.485	0.678381				47.387
				14.489	0.74115			12.371	0.632809				91.077	2.14166			1.888	0.0443961				8.537	0.147202			14.546	0.250815													30.861	1.13257			3.641	0.133621				77.472
				38.51	1.96989			8.544	0.437048				44.892	1.05563			18.839	0.442997				16.053	0.276799			17.582	0.303164													29.518	1.08328			21.799	0.800002				92.927
				10.238	0.5237			12.588	0.643909				11.081	0.260568			1.607	0.0377884				118.797	2.0484			14.904	0.256987													26.245	0.963165			19.466	0.714383				54.028
				8.569	0.438327			11.547	0.590659				47.509	1.11717			21.155	0.497457				187.661	3.23581			26.406	0.455315													22.891	0.840077			3.388	0.124336				52.257
				11.029	0.564162			7.05	0.360626				30.194	0.710008			16.841	0.396014				153.053	2.63907			26.164	0.451142													33.404	1.22589			19.657	0.721392				202.035
				1.872	0.0957577			10.648	0.544673				30.164	0.709302			19.661	0.462326				111.445	1.92163			23.389	0.403293													30.181	1.10761			2.614	0.0959312				109.088
				14.044	0.718387			10.828	0.55388				40.954	0.963028			18.563	0.436506				63.904	1.10189			24.754	0.42683													26.417	0.969478			20.786	0.762826				192.781
				40.003	2.04626			11.918	0.609637				33.74	0.793392			22.409	0.526945				171.909	2.9642			13.071	0.225381													26.32	0.965918			19.557	0.717722				62.99
				35.91	1.83689			8.548	0.437252				73.495	1.72822			20.144	0.473683				38.903	0.670799			15.731	0.271247													28.182	1.03425			22.699	0.833031				60.441
				11.344	0.580275			12.104	0.619151				47.732	1.12241			27.691	0.65115				2.275	0.0392275			22.912	0.395068													25.94	0.951972			20.387	0.748183				55.379
				11.867	0.607028			10.425	0.533266				45.552	1.07115			15.279	0.359284				24.825	0.428054			22.856	0.394103													28.334	1.03983			25.676	0.942284				51.086
				11.573	0.591989			10.912	0.558177				22.116	0.520055			20.939	0.492378				3.844	0.0662815			19.875	0.342702													22.532	0.826902			22.587	0.82892				63.971
				9.662	0.494236			11.356	0.580889				30.308	0.712689			15.608	0.36702				28.142	0.485248			22.738	0.392068													28.985	1.06372			20.429	0.749724				69.036
				1.931	0.0987757			11.182	0.571988				50.441	1.18611			16.352	0.384515				20.247	0.349116			19.451	0.335391													24.673	0.905475			23.67	0.868665				84.714
				8.486	0.434081			11.244	0.57516				52.756	1.24055			14.913	0.350677				24.864	0.428726			15.256	0.263057													28.498	1.04585			25.599	0.939458				62.129
				9.505	0.486205			10.391	0.531527				52.21	1.22771			18.755	0.441021				28.021	0.483162			14.537	0.250659													30.231	1.10945			21.132	0.775523				47.017
				9.986	0.51081			11.705	0.598741				40.164	0.944451			7.967	0.187343				25.953	0.447504			14.314	0.246814													42.631	1.56452			20.945	0.768661				60.104
				10.968	0.561042			13.178	0.674089				31.191	0.733452			18.118	0.426042				28.613	0.49337			24.991	0.430916													39.103	1.43504			18.603	0.682712				60.708
				9.65	0.493623			8.561	0.437917				21.357	0.502207			10.058	0.236513				25.709	0.443296			15.012	0.25885													39.598	1.45321			27.9	1.0239				71.146
				8.7	0.445028			11.864	0.606874				63.799	1.50022			14.812	0.348302				25.25	0.435382			29.486	0.508423													46.274	1.69821			21.471	0.787964				63.736
				28.846	1.47555			13.446	0.687798				27.894	0.655924			20.452	0.480926				19.893	0.343012			14.651	0.252625													32.205	1.18189			18.67	0.68517				53.463
				60.052	3.07182			9.971	0.510043				48.025	1.1293			28.229	0.663801				106.916	1.84354			14.655	0.252694													51.597	1.89356			25.524	0.936705				55.75
				39.044	1.9972			10.984	0.56186				55.459	1.30411			19.968	0.469545				17.958	0.309647			27.178	0.468626													29.602	1.08636			17.986	0.660068				73.417
				8.007	0.409579			11.208	0.573318				21.657	0.509261			24.429	0.574445				188.758	3.25473			16.213	0.279558													57.891	2.12454			21.569	0.791561				91.786
				11.14	0.56984			11.335	0.579815				89.363	2.10136			25.369	0.596549				177.309	3.05731			28.33	0.48849													29.276	1.0744			26.17	0.960413				76.752
				10.891	0.557103			9.68	0.495157				38.798	0.91233			29.351	0.690185				170.186	2.93449			14.318	0.246883													30.718	1.12732			19.279	0.70752				113.791
				11.534	0.589994			13.447	0.687849				74.777	1.75837			18.607	0.437541				209.014	3.604			13.904	0.239745													26.516	0.973111			23.336	0.856408				60.434
				19.134	0.978754			9.762	0.499352				35.502	0.834825			11.937	0.280697				187.174	3.22741			18.485	0.318734													22.595	0.829214			25.404	0.932302				67.974
				10.539	0.539097			6.999	0.358017				42.315	0.995032			15.178	0.356909				77.978	1.34456			29.966	0.516699													24.534	0.900373			29.54	1.08409				53.392
				10.95	0.560121			7.458	0.381496				68.263	1.6052			15.754	0.370453				19.732	0.340236			22.451	0.387119													24.24	0.889584			21.636	0.79402				48.326
				9.839	0.50329			12.066	0.617207				50.216	1.18082			16.484	0.387619				20.541	0.354185			14.066	0.242538													28.495	1.04574			20.4	0.74866				62.018
				10.337	0.528764			12.135	0.620737				52.857	1.24293			12.008	0.282366				24.153	0.416467			13.073	0.225416													23.829	0.874501			26.435	0.970138				60.755
				10.298	0.526769			12.215	0.624829				66.856	1.57211			15.711	0.369442				146.053	2.51837			27.639	0.476575													21.361	0.783927			26.466	0.971276				71.141
				9.817	0.502165			11.374	0.58181				69.925	1.64428			15.499	0.364457				156.383	2.69649			15.085	0.260108													25.434	0.933403			1.825	0.0669757				69.317
				10.817	0.553318			10.335	0.528662				69.12	1.62535			13.477	0.31691				131.962	2.2754			27.62	0.476248													25.614	0.940008			23.837	0.874794				60.495
				6.475	0.331213			9.803	0.501449				65.712	1.54521			17.343	0.407818				24.584	0.423898			22.297	0.384464													24.588	0.902355			5.303	0.194615				59.597
				9.517	0.486819			11.039	0.564673				22.406	0.526874			16.427	0.386279				20.168	0.347754			19.553	0.337149													24.432	0.89663			23.679	0.868996				56.687
				11.243	0.575109			5.294	0.270802				61.981	1.45747			13.248	0.311525				151.876	2.61878			25.548	0.44052													20.8	0.763339			28.649	1.05139				63.278
				10.34	0.528918			5.295	0.270853				68.253	1.60496			11.977	0.281638				20.653	0.356117			15.651	0.269868													23.074	0.846793			24.579	0.902025				65.125
				9.587	0.4904			2.231	0.114121				33.292	0.782857			14.225	0.334499				25.259	0.435537			17.542	0.302474													24.598	0.902722			27.584	1.01231				63.999
				10.913	0.558228			2.272	0.116219				66.502	1.56379			12.855	0.302284				36.582	0.630778			23.759	0.409673													21.44	0.786827			17.273	0.633902				70.421
				9.139	0.467484			10.753	0.550044				89.239	2.09844			9.731	0.228823				99.981	1.72396			24.11	0.415725													24.722	0.907273			20.075	0.736733				54.041
				9.75	0.498738			9.381	0.479862				49.376	1.16107			12.305	0.28935				168.971	2.91354			18.856	0.325131													4.896	0.179678			23.587	0.865619				59.398
				8.901	0.455309			9.38	0.479811				72.487	1.70452			13.216	0.310772				114.279	1.9705			28.656	0.494111													4.308	0.158099			3.021	0.110868				73.748
				7.905	0.404361			7.306	0.373721				27.837	0.654583			14.075	0.330972				20.557	0.354461			18.448	0.318096													71.87	2.63756			26.707	0.98012				7.964
								1.477	0.0755524				42.948	1.00992			13.356	0.314065				21.641	0.373153			18.766	0.323579													39.774	1.45967			20.154	0.739632				107.12
								8.839	0.452138				53.746	1.26383			16.109	0.378801				23.601	0.406949			26.317	0.45378													29.274	1.07433			22.001	0.807415				141.582
								7.203	0.368452				64.572	1.5184			16.544	0.38903				27.456	0.47342			25.892	0.446452													46.787	1.71704			20.039	0.735411				104.269
								9.765	0.499505				88.922	2.09099			15.618	0.367255				22.179	0.382429			22.454	0.387171													52.67	1.93294			23.744	0.871381				108.373
								6.734	0.344462				28.666	0.674077			15.351	0.360977				189.735	3.27157			23.004	0.396655													28.453	1.0442			25.558	0.937953				45.996
								8.299	0.424515				57.373	1.34912			16.947	0.398506				28.457	0.49068			22.823	0.393534													38.468	1.41174			24.624	0.903676				101.571
								3.857	0.197296				19.191	0.451274			16.527	0.38863				15.435	0.266143			24.703	0.42595													32.286	1.18486			25.532	0.936999				57.639
								7.618	0.38968				15.851	0.372734			18.212	0.428253				21.814	0.376136			25.28	0.435899													84.159	3.08855			22.074	0.810094				41.468
								7.152	0.365843				59.372	1.39612			15.544	0.365515				25.219	0.434847			23.026	0.397034													126.737	4.65112			26.595	0.97601				53.849
								6.018	0.307836				55.378	1.30221			12.633	0.297063				24.133	0.416122			21.284	0.366997													29.168	1.07044			25.372	0.931127				69.555
								5.647	0.288859				30.398	0.714805			16.73	0.393404				18.804	0.324235			24.082	0.415242													29.052	1.06618			4.979	0.182724				58.949
								8.775	0.448864				39.924	0.938807			11.365	0.267246				159.899	2.75711			23.136	0.398931													32.059	1.17653			27.212	0.998653				59.731
								7.899	0.404054				47.338	1.11315			16.056	0.377555				139.771	2.41005			23.921	0.412466													33.889	1.24369			25.187	0.924338				56.033
								11.407	0.583498				63.305	1.48861			12.768	0.300238				50.142	0.864591			27.267	0.470161													32.394	1.18883			24.48	0.898392				55.989
								3.085	0.157806				59.063	1.38886			14.211	0.33417				143.671	2.4773			18.474	0.318544													34.478	1.26531			26.228	0.962542				55.203
								5.655	0.289268				105.356	2.47743			19.696	0.463149				47.868	0.825381			26.724	0.460798													34.091	1.25111			27.616	1.01348				56.705
								8.553	0.437508				22.987	0.540536			16.385	0.385291				142.927	2.46447			28.078	0.484145													29.389	1.07855			24.144	0.886061				61.079
								7.89	0.403594				43.45	1.02172			20.866	0.490661				147.369	2.54106			26.176	0.451349													2.359	0.086573			19.77	0.725539				51.121
								5.12	0.261901				33.477	0.787207			17.826	0.419176				24.223	0.417674			19.65	0.338822													31.901	1.17073			25.472	0.934797				48.352
								6.339	0.324256				66.527	1.56437			15.667	0.368407				27.203	0.469057			26.344	0.454246													28.184	1.03432			26.468	0.971349				6.66
								8.764	0.448301				54.813	1.28892			17.925	0.421504				122.378	2.11015			25.291	0.436089													27.771	1.01917			11.795	0.432865				51.566
								6.972	0.356636				34.021	0.799999			17.621	0.414355				184.013	3.17291			28.993	0.499922													27.396	1.00541			23.153	0.849692				55.92
								10.311	0.527434				56.949	1.33915			19.375	0.455601				101.006	1.74163			23.608	0.407069													27.173	0.997222			22.059	0.809543				61.186
								7.915	0.404873				65.394	1.53773			19.725	0.463831				45.057	0.776911			24.575	0.423743													32.53	1.19382			15.191	0.557495				61.697
								9.734	0.497919				11.051	0.259863			16.116	0.378966				13.772	0.237469			28.558	0.492421													27.809	1.02056			18.386	0.674748				227.316
								6.608	0.338016				46.28	1.08827			4.626	0.10878				20.164	0.347685			24.561	0.423502													29.571	1.08523			17.763	0.651884				199.222
								9.593	0.490707				70.675	1.66191			12.023	0.282719				15.81	0.272609			26.038	0.448969													31.643	1.16127			21.489	0.788625				117.035
								6.546	0.334845				74.81	1.75915			14.959	0.351759				15.481	0.266937			9.237	0.159272													28.92	1.06134			29.925	1.09822				205.708
								7.209	0.368759				55.687	1.30947			13.742	0.323141				18.978	0.327235			22.983	0.396292													29.304	1.07543			23.459	0.860922				58.801
								7.147	0.365588				22.133	0.520455			14.277	0.335722				17.521	0.302112			31.654	0.545805													24.749	0.908264			21.333	0.7829				212.407
								143.585	7.34475				27.245	0.640662			13.619	0.320249				18.626	0.321165			24.356	0.419967													24.632	0.90397			22.105	0.811232				58.003
								1.533	0.0784169				34.088	0.801575			19.059	0.44817				94.57	1.63066			29.693	0.511992													37.255	1.36722			18.511	0.679335				54.491
								2.363	0.120874				54.906	1.29111			19.653	0.462138				17.561	0.302802			8.125	0.140098													37.424	1.37342			22.493	0.825471				200.62
								1.612	0.082458				64.981	1.52802			16.601	0.39037				167.448	2.88728			24.514	0.422691													31.144	1.14295			24.444	0.89707				54.328
								1.703	0.0871129				26.381	0.620346			13.433	0.315875				16.691	0.2878			25.417	0.438262													35.12	1.28887			25.408	0.932448				54.87
								0.848	0.0433774				30.236	0.710995								168.476	2.90501			16.558	0.285507													30.989	1.13727			25.488	0.935384				77.806
								3.936	0.201337				43.66	1.02666								13.633	0.235072			22.351	0.385395													29.368	1.07778			24.129	0.88551				85.121
								3.227	0.165069				47.688	1.12138								166.24	2.86645			26.541	0.457642													24.574	0.901841			24.33	0.892887				61.155
								4.715	0.241184				70.826	1.66546								19.901	0.34315			24.562	0.423519													29.525	1.08354			16.59	0.608837				55.615
								2.391	0.122306				58.931	1.38575								17.643	0.304216			29.864	0.51494													29.058	1.0664			25.23	0.925916				61.201
								3.739	0.19126				41.291	0.970952								123.689	2.13275			2.453	0.0422967													28.279	1.03781			15.308	0.561788				59.679
								3.195	0.163433				51.599	1.21334								132.316	2.28151			14.643	0.252487													29.892	1.09701			22.54	0.827196				49.58
								1.836	0.0939162				80.12	1.88401								12.883	0.22214			25.879	0.446228													27.867	1.02269			24.79	0.909768				52.659
								2.922	0.149468				52.6	1.23688								130.605	2.252			25.325	0.436675													25.6	0.939495			19.69	0.722603				50.888
								4.181	0.213869				34.233	0.804984								134.594	2.32078			26.351	0.454366													27.485	1.00867			20.548	0.754091				63.329
								4.666	0.238678				76.414	1.79686								98.978	1.70666			30.381	0.523855													26.205	0.961697			17.509	0.642563				51
								5.341	0.273206				75.144	1.767								19.677	0.339288			30.634	0.528217													31.064	1.14002			20.818	0.764				61.05
								5.496	0.281135				71.791	1.68816								22.841	0.393844			16.659	0.287249													25.06	0.919677			22.272	0.81736				51.431
								8.112	0.41495				54.023	1.27034								24.371	0.420226			26.722	0.460763													33.206	1.21863			23.184	0.85083				45.902
								6.219	0.318118				63.543	1.49421								158.849	2.73901			28.023	0.483196													23.313	0.855564			24.537	0.900484				53.778
								6.863	0.35106				15.367	0.361353								24.06	0.414863			30.049	0.51813													30.91	1.13437			26.811	0.983937				55.13
								7.834	0.400729				31.748	0.74655								19.068	0.328787			26.984	0.465281													4.761	0.174724			21.139	0.77578				6.492
								5.368	0.274587				7.026	0.165215								24.328	0.419484			26.11	0.450211													28.264	1.03726			29.748	1.09172				62.758
								7.201	0.36835				25.109	0.590435								22.588	0.389482			13.6	0.234503													26.458	0.970982			17.444	0.640177				82.039
								5.208	0.266403				11.127	0.26165								213.711	3.68499			19.366	0.333925													5.393	0.197918			5.664	0.207863				61.61
								6.901	0.353004				28.106	0.660909								24.123	0.415949			21.454	0.369928													30.04	1.10244			21.484	0.788441				58.43
								6.308	0.322671				51.512	1.2113								19.736	0.340305			29.449	0.507785													24.168	0.886942			27.231	0.999351				111.405
								5.264	0.269267				11.954	0.281097								29.304	0.505284			24.001	0.413846													27.182	0.997552			23.631	0.867234				52.8
								5.438	0.278168				23.462	0.551706								19.863	0.342495			4.108	0.0708336													22.843	0.838315			23.446	0.860445				58.703
								5.44	0.27827				58.636	1.37882								23.857	0.411363			24.901	0.429364													30.458	1.11778			23.861	0.875675				48.684
								4.336	0.221798				46.236	1.08723								107.087	1.84649			24.523	0.422846													34.043	1.24934			19.904	0.730457				62.927
								2.419	0.123738				30.421	0.715346								148.125	2.5541			28.215	0.486507													39.067	1.43372			21.886	0.803194				60.525
								6.005	0.307171				5.62	0.132154								16.275	0.280627			3.607	0.062195													39.048	1.43302			26.233	0.962725				59.107
								11.152	0.570454				24.884	0.585144								18.675	0.32201			31.279	0.539339													20.81	0.763706			25.441	0.933659				68.654
								11.87	0.607181				41.626	0.97883								26.081	0.449711			28.591	0.49299													5.168	0.18966			22.405	0.822241				51.65
								13.72	0.701814				12.047	0.283284								137.619	2.37294			30.029	0.517786													22.48	0.824994			22.939	0.841838				58.085
								9.982	0.510605				7.432	0.174762								25.349	0.437089			25.396	0.437899													18.736	0.687593			18.352	0.6735				43.982
								8.709	0.445488				6.295	0.148026								144.5	2.49159			27.743	0.478368													19.639	0.720732			22.774	0.835783				53.476
								12.609	0.644983				36.109	0.849098								136.714	2.35734			25.928	0.447073													24.346	0.893474			22.915	0.840958				52.881
								8.696	0.444823				16.793	0.394885								138.591	2.3897			22.735	0.392016													22.175	0.8138			22.554	0.827709				60.676
								11.04	0.564725				47.352	1.11348								100.946	1.7406			27.435	0.473058													22.312	0.818828			25.758	0.945293				52.156
								11.104	0.567998				38.435	0.903794								208.579	3.5965			19.615	0.338219													20.475	0.751412			24.805	0.910319				51.846
								9.294	0.475412				23.883	0.561606								21.013	0.362324			4.003	0.0690231													22.215	0.815268			20.147	0.739375				50.985
								11.317	0.578894				45.667	1.07385								108.048	1.86306			25.567	0.440848													23.416	0.859344			23.074	0.846793				50.512
								10.931	0.559149				49.202	1.15698								143.874	2.4808			26.703	0.460436													20.499	0.752293			30.277	1.11114				41.495
								11.305	0.57828				48.125	1.13165								119.302	2.05711			23.464	0.404586													17.195	0.631039			23.129	0.848811				47.647
								10.539	0.539097				50.287	1.18249								191.413	3.30051			25.467	0.439124													23.615	0.866647			25.781	0.946137				70.317
								10.565	0.540427				19.275	0.453249								18.375	0.316837			23.362	0.402827													23.722	0.870574			25.103	0.921255				71.926
								1.781	0.0911028				61.455	1.44511								21.037	0.362738			29.937	0.516199													18.539	0.680363			22.269	0.81725				63.821
								9.712	0.496794				31.166	0.732864								20.749	0.357772			31.322	0.540081													22.996	0.84393			23.359	0.857252				52.385
													12.928	0.304								18.488	0.318786			32.316	0.55722													23	0.844077			19.283	0.707667				55.195
													28.242	0.664107								163.045	2.81136			29.421	0.507302													24.854	0.912117			26.22	0.962248				61.116
													59.074	1.38912								156.832	2.70423			29.795	0.513751													4.809	0.176486			26.242	0.963055				56.513
													38.957	0.916069								23.532	0.405759			19.387	0.334287													4.443	0.163054			33.266	1.22083				49.76
													25.315	0.595279								19.793	0.341288			29.328	0.505698													25.18	0.924081			26.034	0.955422				54.716
													40.736	0.957902								187.068	3.22559			24.341	0.419708													79.223	2.90741			25.532	0.936999				60.74
													43.988	1.03437								124.058	2.13911			26.902	0.463867													24.075	0.883529			23.514	0.86294				59.937
													35.427	0.833061								144.734	2.49563			27.029	0.466057													30.956	1.13605			29.641	1.0878				49.375
													32	0.752476								200.519	3.45752			24.59	0.424002													82.417	3.02462			21.424	0.786239				188.194
													39.626	0.9318								187.233	3.22843			32.652	0.563014													22.246	0.816406			36.157	1.32693				51.648
													46.359	1.09013								158.264	2.72892			29.154	0.502698													25.183	0.924191			29.622	1.0871				50.454
													48.106	1.13121								191.983	3.31033			43.548	0.750892													28.746	1.05495			29.35	1.07712				68.774
													46.225	1.08697								155.569	2.68245			26.984	0.465281													22.788	0.836297			29.98	1.10024				59.747
													25.489	0.59937								19.67	0.339167			28.368	0.489145													23.331	0.856224			32.433	1.19026				102.546
													4.357	0.102454								58.138	1.00246			21.72	0.374515													22.692	0.832774			32.051	1.17624				53.85
													49.198	1.15688								19.576	0.337546			26.343	0.454228													18.558	0.68106			29.298	1.07521				66.593
													10.557	0.248246								158.648	2.73554			13.733	0.236796													25.093	0.920888			28.565	1.04831				59.465
													42.361	0.996113								20.191	0.34815			28.894	0.498215													20.035	0.735265			33.556	1.23147				190.384
													30.269	0.711771								22.029	0.379843			29.625	0.510819													19.974	0.733026			1.8	0.0660582				56.215
													22.54	0.530025								99.596	1.71732			24.862	0.428692													23.819	0.874134			35.171	1.29074				56.923
													43.315	1.01855								34.864	0.601155			26.816	0.462384													25.078	0.920338			26.107	0.958101				70.124
													54.77	1.28791								103.895	1.79145			24.357	0.419984													24.649	0.904594			29.795	1.09345				53.069
													34.103	0.801927								17.583	0.303181			28.422	0.490076													28.623	1.05044			7.77	0.285151				38.606
													48.786	1.1472								19.341	0.333494			27.209	0.469161													22.752	0.834976			24.61	0.903163				49.673
													6.341	0.149108								59.61	1.02785			28.444	0.490456													25.705	0.943348			28.675	1.05234				48.625
													31.83	0.748478								15.886	0.27392			24.551	0.423329													23.254	0.853399			7.701	0.282619				53.139
													27.535	0.647482								18.384	0.316993			26.199	0.451745													23.816	0.874024			28.388	1.04181				135.485
													36.288	0.853307								115.971	1.99967			29.692	0.511975													25.037	0.918833			28.725	1.05418				65.092
													18.325	0.43091								150.849	2.60107			27.268	0.470178													23.579	0.865326			29.336	1.0766				71.995
													20.882	0.491037								15.196	0.262022			28.322	0.488352													17.719	0.65027			30.231	1.10945				56.733
													27.17	0.638899								162.518	2.80227			23.94	0.412794													21.457	0.787451			25.772	0.945807				58.599
													71.41	1.6792								15.703	0.270764			26.864	0.463212													10.029	0.368054			29.419	1.07965				59.491
													9.313	0.218994								36.877	0.635865			18.817	0.324459													20.55	0.754165			16.818	0.617204				76.319
													42.352	0.995902								110.103	1.89849			24.007	0.413949													22.266	0.81714			3.092	0.113473				101.751
													38.455	0.904264								14.586	0.251504			37.37	0.644365													16.594	0.608983			31.661	1.16193				55.949
													35.877	0.843643								18.531	0.319527			27.566	0.475316													20.283	0.744366			24.894	0.913585				197.686
													32.597	0.766514								15.344	0.264574			23.974	0.41338													20.91	0.767376			31.584	1.1591				45.841
													20.081	0.472202								16.618	0.286542			38.388	0.661919													24.512	0.899566			7.005	0.257077				54.924
													67.397	1.58483								150.382	2.59301			31.835	0.548926													27.427	1.00654			20.777	0.762495				66.73
													104.121	2.44839								186.973	3.22395			33.521	0.577998													21.791	0.799708			22.538	0.827122				72.888
													47.329	1.11294								34.184	0.58943			23.909	0.412259													22.123	0.811892			7.103	0.260673				179.763
													77.394	1.81991								22.072	0.380584			26.827	0.462574													32.809	1.20406			23.146	0.849435				69.682
													42.441	0.997994								167.989	2.89661			27.605	0.475989													40.273	1.47798			30.166	1.10706				80.548
													27.326	0.642567								14.616	0.252022			17.169	0.296043													30.397	1.11554			26.93	0.988304				145.833
													41.705	0.980687								15.339	0.264488			39.18	0.675575													36.621	1.34395			32.408	1.18934				67.682
													61.464	1.44532								41.061	0.708009			22.704	0.391482													26.826	0.984488			26.291	0.964854				52.435
													73.725	1.73363								14.628	0.252228			26.821	0.46247													24.55	0.900961			27.064	0.993222				61.936
													37.316	0.877481								19.086	0.329097			28.037	0.483438													41.07	1.50723			22.437	0.823416				68.332
													18.245	0.429029								14.773	0.254729			23.411	0.403672													25.243	0.926393			8.377	0.307428				59.229
													33.262	0.782151								15.585	0.26873			38.626	0.666022													25.916	0.951091			25.248	0.926576				6.758
													16.304	0.383386								16.723	0.288352			32.653	0.563031													23.549	0.864225			23.479	0.861656				6.517
													30.608	0.719743								15.841	0.273144			31.996	0.551702													138.276	5.07459			28.13	1.03234				54.68
													23.831	0.560383								20.12	0.346926			34.788	0.599844													23.817	0.87406			24.958	0.915934				44.924
													12.926	0.303953								24.47	0.421933			29.851	0.514716													21.147	0.776074			23.398	0.858683				48.126
													10.608	0.249446								13.981	0.241072			28.777	0.496198													19.401	0.711997			24.529	0.90019				49.635
													30.746	0.722988								15.184	0.261815			27.9	0.481076													22.512	0.826168			31.167	1.1438				57.915
													25.246	0.593656								17.323	0.298698			30.566	0.527045													20.341	0.746494			25.676	0.942284				47.768
													29.199	0.686611								15.132	0.260919			21.44	0.369687													22.902	0.840481			24.924	0.914686				48.994
													60.279	1.41745								17.057	0.294111			32.587	0.561893													19.865	0.729026			4.297	0.157696				47.542
													41.273	0.970529								129.951	2.24073			18.342	0.316268													20.052	0.735888			25.07	0.920044				59.45
													33.152	0.779565								15.212	0.262298			29.734	0.512699													25.822	0.947642			28.765	1.05565				108.919
													54.834	1.28941								13.715	0.236486			35.392	0.610259													20.076	0.736769			26.207	0.961771				56.409
													3.885	0.0913553								16.666	0.287369			32.371	0.558168													21.409	0.785689			22.59	0.829031				50.152
													9.086	0.213656								135.21	2.33141			36.635	0.631692													24.337	0.893144			30.973	1.13668				82.694
													52.926	1.24455								18.338	0.316199			31.33	0.540219													23.213	0.851894			29.163	1.07025				176.581
													10.711	0.251868								16.961	0.292456			36.763	0.633899													23.571	0.865032			28.332	1.03976				211.444
													46.137	1.08491								15.718	0.271023			30.56	0.526942													24.676	0.905585			19.145	0.702602				78.37
													18.262	0.429428								16.175	0.278903			28.019	0.483127													21.973	0.806387			24.573	0.901805				133.402
													41.985	0.987272								18.023	0.310768			31.932	0.550599													23.089	0.847343			23.029	0.845141				69.482
													59.946	1.40962								15.22	0.262436			28.354	0.488904													26.577	0.975349			28.053	1.02952				70.873
													23.521	0.553093								31.05	0.535391			26.695	0.460298													23.13	0.848848			23.692	0.869473				131.289
													43.451	1.02174								26.703	0.460436			29.674	0.511664													22.428	0.823085			24.56	0.901328				83.123
													22.134	0.520478								16.79	0.289507			30.661	0.528683													23.759	0.871932			32.01	1.17474				55.297
													26.128	0.614396								20.305	0.350116			32.285	0.556685													22.575	0.82848			22.85	0.838572				53.561
													8.468	0.199124								20.096	0.346512			37.393	0.644762													22.84	0.838205			32.141	1.17954				51.035
													57.337	1.34827								140.42	2.42124			35.262	0.608017													24.588	0.902355			21.931	0.804846				65.853
													79.932	1.87959								157.542	2.71647			31.104	0.536322													27.892	1.02361			26.394	0.968634				54.265
													31.054	0.730231								19.632	0.338512			1.74	0.0300026													23.057	0.846169			26.315	0.965734				5.579
													25.806	0.606825								18.869	0.325355			33.846	0.583602													23.51	0.862794			24.455	0.897474				71.199
													15.795	0.371417								104.223	1.7971			36.176	0.623777													24.173	0.887125			26.365	0.967569				54.615
													21.701	0.510296								3.016	0.0520044			33.51	0.577808													21.709	0.796699			29.453	1.0809				60.166
													39.623	0.931729								118.872	2.04969			32.25	0.556082													24.726	0.90742			25.975	0.953257				54.179
													52.232	1.22823								79.606	1.37263			33.151	0.571618													23.294	0.854867			29.043	1.06585				44.15
													57.485	1.35175								161.26	2.78058			34.195	0.589619													24.954	0.915787			26.145	0.959496				114.961
													13.947	0.327962								185.225	3.19381			35.028	0.603983													24.321	0.892557			26.022	0.954982				108.207
													55.319	1.30082								18.238	0.314475			34.826	0.6005													25.56	0.938027			24.944	0.91542				67.992
													8.557	0.201217								136.591	2.35522			34.892	0.601638													19.734	0.724218			28.303	1.03869				70.022
													22.408	0.526921								14.182	0.244538			14.327	0.247038													25.15	0.92298			26.134	0.959092				87.941
													52.841	1.24255								164.753	2.84081			27.133	0.46785													23.417	0.859381			29.501	1.08266				61.778
													32.269	0.758801								29.77	0.51332			29.964	0.516665													37.806	1.38744			30.482	1.11866				65.674
													42.611	1.00199								101.784	1.75505			23.998	0.413794													23.556	0.864482			24.85	0.91197				57.595
													33.321	0.783539								160.347	2.76484			21.606	0.372549													20.459	0.750825			28.383	1.04163				90
													58.11	1.36645								119.718	2.06428			6.138	0.105837													28.799	1.05689			29.927	1.09829				56.638
													6.524	0.153411								105.89	1.82585			27.256	0.469971													20.96	0.769211			29.998	1.1009				126.323
													58.525	1.37621								157.518	2.71606			24.972	0.430588													21.809	0.800369			29.757	1.09205				63.855
													25.623	0.602521								227.641	3.92518			5.648	0.0973876													21.127	0.77534			4.614	0.169329				62.183
													57.041	1.34131								20.218	0.348616			25.922	0.446969													20.255	0.743338			6.713	0.24636				117.709
													28.249	0.664271								18.822	0.324545			27.238	0.469661													34.539	1.26755			38.305	1.40576				58.039
													47.701	1.12168								20.78	0.358306			23.287	0.401534													24.157	0.886538			23.592	0.865803				57.529
													81.287	1.91145								100.156	1.72697			33.366	0.575325													29.026	1.06523			20.146	0.739338				60.293
													72.527	1.70546								33.221	0.572825			22.155	0.382015													23.515	0.862977			27.124	0.995424				56.988
													56.006	1.31697								102.892	1.77415			29.177	0.503095													24.887	0.913328			25.393	0.931898				62.48
													44.181	1.03891								60.412	1.04168			24.81	0.427795													17.558	0.644361			24.147	0.886171				182.441
													50.837	1.19543								143.109	2.46761			33.224	0.572876													18.585	0.682051			21.605	0.792882				52.544
													26.955	0.633843								15.231	0.262626			29.287	0.504991													20.979	0.769908			28.5	1.04592				50.56
													39.984	0.940218								19.675	0.339253			17.631	0.304009													20.244	0.742935			27.651	1.01476				57.606
													44.148	1.03813								118.565	2.0444			28.947	0.499129													22.122	0.811855			29.505	1.0828				173.11
													28.833	0.678004								89.221	1.53842			22.423	0.386636													22.054	0.80936			30.198	1.10824				218.531
													47.395	1.11449								13.676	0.235813			6.595	0.113717													20.889	0.766606			25.855	0.948853				50.975
													69.321	1.63007								14.849	0.256039			27.984	0.482524													17.986	0.660068			29.241	1.07312				54.073
													38.548	0.906451								169.541	2.92337			29.099	0.50175													20.035	0.735265			30.096	1.10449				142.751
													40.143	0.943957								13.028	0.22464			4.171	0.0719199													17.401	0.638599			28.399	1.04222				64.742
													11.538	0.271315								116.217	2.00391			29.496	0.508595													19.792	0.726347			26.128	0.958872				58.248
													38.954	0.915998								13.012	0.224364			27.824	0.479765													17.362	0.637168			26.242	0.963055				76.511
													40.967	0.963333								19.846	0.342202			26.1	0.450038													19.215	0.705171			29.792	1.09334				63.237
													7.607	0.178878								17.971	0.309871			23.42	0.403828													19.044	0.698896			24.513	0.899603				49.919
													43.36	1.0196								186.213	3.21084			18.048	0.311199													21.401	0.785395			29.138	1.06934				62.213
													28.532	0.670926								34.106	0.588085			33.377	0.575515													21.133	0.77556			27.26	1.00041				63.034
													55.357	1.30171								176.513	3.04359			26.181	0.451435													20.207	0.741577			21.869	0.802571				59.499
													41.862	0.984379								24.542	0.423174			30.395	0.524096													21.018	0.77134			20.754	0.761651				51.432
													59.671	1.40316								90.212	1.55551			29.541	0.509371													19.843	0.728218			28.89	1.06023				53.54
													28.535	0.670997								42.358	0.730373			28.551	0.492301													19.144	0.702566			24.168	0.886942				63.202
													46.467	1.09267								14.916	0.257194			29.003	0.500094													18.302	0.671665			3.173	0.116446				63.116
													38.132	0.896669								105.744	1.82333			25.698	0.443107													19.244	0.706236			25.989	0.95377				79.729
													24.077	0.566167								11.291	0.194689			34.223	0.590102													20.591	0.755669			2.624	0.0962982				51.472
													44.239	1.04027								128.632	2.21798			20.087	0.346357													18.01	0.660949			1.951	0.0715998				72.701
													32.518	0.764656								144.022	2.48335			28.188	0.486041													23.311	0.855491			21.941	0.805213				59.517
													42.116	0.990352								19.265	0.332184			27.509	0.474334													18.246	0.66961			21.047	0.772404				102.328
													6.58	0.154728								10.734	0.185085			31.871	0.549547													17.997	0.660472			21.058	0.772808				53.295
													16.621	0.390841								113.089	1.94998			36.003	0.620794													22.93	0.841508			21.62	0.793433				58.252
													30.046	0.706528								17.001	0.293146			3.483	0.0600568													23.775	0.872519			25.78	0.9461				55.024
													11.611	0.273031								96.357	1.66147			35.432	0.610949													20.329	0.746054			29.967	1.09976				63.397
													40.532	0.953105								13.788	0.237744			22.324	0.384929													27.067	0.993332			29.065	1.06666				46.427
													54.096	1.27206								16.423	0.283179			33.259	0.57348													4.13	0.151567			33.974	1.24681				6.817
													39.732	0.934293								16.094	0.277506			24.263	0.418363													26.272	0.964156			23.478	0.861619				43.658
													15.61	0.367067								17.135	0.295456			25.961	0.447642													24.614	0.903309			22.251	0.81659				54.342
													42.92	1.00926								15.019	0.25897			26.319	0.453815													24.414	0.89597			25.551	0.937696				49.403
													20.884	0.491084								13.945	0.240452			31.461	0.542477													10	0.36699			24.664	0.905144				55.179
													39.257	0.923123								13.703	0.236279			43.431	0.748874													25.208	0.925109			24.542	0.900667				46.775
													41.133	0.967237								14.582	0.251435			27.555	0.475127													22.177	0.813874			21.411	0.785762				47.094
													35.697	0.83941								68.559	1.18215			25.425	0.438399													23.738	0.871161			26.941	0.988708				54.566
													26.397	0.620722								14.41	0.248469			28.455	0.490645													27.827	1.02122			24.517	0.89975				47.692
													78.51	1.84615								14.516	0.250297			20.824	0.359065													23.866	0.875858			28.615	1.05014				52.305
													39.303	0.924205								14.79	0.255022			26.701	0.460401													21.793	0.799781			27.881	1.0232				78.308
													35.325	0.830663								11.786	0.203224			12.489	0.215346													24.376	0.894575			25.777	0.94599				55.587
													36.32	0.85406								149.697	2.5812			29.248	0.504319													23.901	0.877143			22.78	0.836003				51.378
													28.275	0.664883								160.521	2.76784			26.105	0.450125													24.015	0.881327			24.003	0.880886				60.759
													52.232	1.22823								20.752	0.357824			27.064	0.466661													23.64	0.867564			24.247	0.889841				57.738
													28.388	0.66754								27.938	0.481731			24.444	0.421484													25.077	0.920301			10.123	0.371504				84.966
													42.244	0.993362								13.947	0.240486			29.902	0.515596													21.063	0.772991			19.427	0.712952				79.749
													33.389	0.785138								15.136	0.260988			28.024	0.483214													23.684	0.869179			25.376	0.931274				53.282
													11.271	0.265036								11.199	0.193103			28.89	0.498146													23.021	0.844848			19.981	0.733283				47.821
													34.867	0.819893								172.304	2.97101			23.317	0.402052													24.293	0.891529			23.785	0.872886				74.146
													44.964	1.05732								11.923	0.205587			28.266	0.487386													22.992	0.843784			4.16	0.152668				58.102
													19.737	0.464113								16.953	0.292318			29.483	0.508371													17.821	0.654013			25.426	0.933109				46.064
													20.48	0.481584								11.467	0.197724			28.045	0.483576													22.255	0.816736			27.886	1.02339				4.145
													29.769	0.700014								10.295	0.177515			23.582	0.406621													24.979	0.916704			24.49	0.898759				8.412
													28.416	0.668198								13.743	0.236968			30.245	0.52151													23.77	0.872335			21.102	0.774422				56.486
													28.87	0.678874								11.487	0.198069			28.158	0.485524													26.808	0.983827			21.53	0.79013				47.471
													37.633	0.884935								156.595	2.70014			18.83	0.324683													32.248	1.18347			22.599	0.829361				50.64
													5.504	0.129426								15.275	0.263385			39.335	0.678248													19.119	0.701648			27.72	1.0173				43.731
													40.506	0.952493								14.697	0.253418			28.324	0.488387													32.149	1.17984			31.316	1.14927				46.848
													8.508	0.200064								15.466	0.266678			28.562	0.49249													22.127	0.812039			21.258	0.780147				53.747
													57.378	1.34924								15.285	0.263557			23.93	0.412621													21.471	0.787964			27.296	1.00174				42.435
													6.916	0.162629								16.09	0.277437			32.952	0.568186													20.298	0.744916			24.014	0.88129				49.968
													9.339	0.219605								12.356	0.213053			41.678	0.718648													34.002	1.24784			21.987	0.806901				55.744
													34.198	0.804161								13.448	0.231882			35.138	0.605879													22.562	0.828003			26.251	0.963386				56.454
													23.017	0.541242								42.315	0.729631			4.975	0.0857832													22.031	0.808516			31.773	1.16604				46.504
													41.312	0.971446								16.243	0.280076			31.39	0.541253													25.73	0.944265			29.217	1.07223				43.041
													59.906	1.40868								17.13	0.29537			29.471	0.508164													20.503	0.75244			26.269	0.964046				47.969
													18.413	0.432979								15.239	0.262764			28.039	0.483472													20.132	0.738824			29.605	1.08647				52.479
													50.776	1.19399								115.65	1.99414			32.286	0.556703													8.213	0.301409			5.978	0.219387				43.529
													50.536	1.18835								15.651	0.269868			22.423	0.386636													32.854	1.20571			3.675	0.134869				11.763
													29.106	0.684424								178.126	3.0714			33.697	0.581032													21.707	0.796625			2.006	0.0736182				47.832
													45.392	1.06739								14.022	0.241779			19.416	0.334787													27.631	1.01403			3.087	0.11329				56.429
													11.146	0.262097								16.17	0.278817			28.201	0.486266													27.406	1.00577			24.951	0.915677				47.556
													29.919	0.703541								150.852	2.60112			33.166	0.571876													33.806	1.24065			21.147	0.776074				47.619
													38.029	0.894247								90.885	1.56712			34.843	0.600793													23.937	0.878464			26.411	0.969257				42.673
													35.707	0.839645								11.66	0.201052			36.011	0.620932													30.034	1.10222			23.119	0.848444				52.937
													12.3	0.289233								107.203	1.84849			36.783	0.634244													33.394	1.22553			24.495	0.898942				49.783
													17.813	0.41887								172.515	2.97465			27.011	0.465747													29.088	1.0675			27.64	1.01436				50.504
													12.157	0.28587								14.006	0.241503			33.317	0.57448													26.809	0.983864			25.973	0.953183				38.669
													23.844	0.560688								108.112	1.86416			27.771	0.478851													27.212	0.998653			31.803	1.16714				8.838
													3.332	0.0783515								14.449	0.249142			26.93	0.46435													27.42	1.00629			29.874	1.09635				87.427
													63.031	1.48217								104.969	1.80996			29.408	0.507078													26.068	0.95667			20.661	0.758238				87.893
													8.224	0.193386								19.71	0.339857			30.294	0.522355													28.071	1.03018			31.503	1.15613				53.364
													27.072	0.636594								17.943	0.309388			32.619	0.562445													31.705	1.16354			25.687	0.942687				59.058
													69.593	1.63647								98.632	1.7007			39.543	0.681834													28.115	1.03179			32.647	1.19811				50.491
													36.958	0.869062								13.817	0.238244			35.824	0.617708													31.266	1.14743			25.384	0.931568				57.554
													6.906	0.162394								14.141	0.243831			28.646	0.493939													21.415	0.785909			24.827	0.911126				71.306
													2.483	0.0583874								13.264	0.228709			1.873	0.0322959													33.105	1.21492			27.268	1.00071				49.681
													1.724	0.0405396								41.345	0.712906			32.275	0.556513													38.944	1.42921			2.059	0.0755633				56.526
													6.255	0.147085								16.102	0.277644			33.087	0.570514													29.302	1.07535			23.002	0.844151				44.193
													26.582	0.625072								13.135	0.226485			34.165	0.589102													36.071	1.32377			25.586	0.938981				121.711
													2.426	0.0570471								171.899	2.96403			32.162	0.554565													26.393	0.968597			21.687	0.795891				95.765
													7.686	0.180735								13.653	0.235417			30.511	0.526097													24.786	0.909622			26.408	0.969147				44.752
													22.862	0.537597								130.154	2.24423			31.658	0.545874													41.025	1.50558			22.574	0.828443				44.404
													20.87	0.490755								16.591	0.286076			32.987	0.56879													25.424	0.933036			25.961	0.952743				54.815
													28.196	0.663025								14.766	0.254608			33.782	0.582498													22.075	0.810131			24.093	0.884189				45.056
													12.967	0.304917								126.418	2.17981			33.468	0.577084													25.721	0.943935			29.585	1.08574				52.006
													20.562	0.483513								105.409	1.81755			33.952	0.585429													23.328	0.856114			25.547	0.937549				58.793
													78.739	1.85154								13.693	0.236106			12.205	0.210449													136.24	4.99987			21.445	0.78701				47.777
													20.213	0.475306								20.991	0.361945			23.888	0.411897													23.537	0.863784			23.978	0.879969				44.471
													41.988	0.987342								117.799	2.03119			28.365	0.489093													20.338	0.746384			25.569	0.938357				46.779
													12.011	0.282437								15.56	0.268299			20.154	0.347512													22.624	0.830278			24.406	0.895676				40.69
													23.327	0.548531								14.669	0.252935			21.512	0.370928													19.756	0.725026			24.134	0.885694				46.033
													2.327	0.0547191								172.265	2.97034			30.23	0.521251													19.873	0.729319			22.172	0.81369				39.238
													16.203	0.381011								14.291	0.246418			25.611	0.441607													22.832	0.837912			21.639	0.79413				46.963
													3.133	0.0736721								124.745	2.15096			26.512	0.457142													19.901	0.730347			29.145	1.06959				55.159
													60.174	1.41498								114.721	1.97812			33.076	0.570325													20.421	0.74943			21.316	0.782276				115.048
													21.913	0.515281								12.788	0.220502			39.559	0.68211													25.786	0.946321			23.175	0.850499				59.718
													20.432	0.480456								70.471	1.21512			25.489	0.439503													19.409	0.712291			27.926	1.02486				60.127
													66.289	1.55878								12.719	0.219312			27.464	0.473558													21.126	0.775303			24.64	0.904263				92.469
													33.832	0.795555								118.412	2.04176			24.915	0.429606													24.37	0.894355			24.458	0.897584				74.041
													10.244	0.240886								102.012	1.75898			28.352	0.488869													22.839	0.838169			26.052	0.956082				77.586
													72.61	1.70741								12.01	0.207087			31.987	0.551547													23.341	0.856591			26.522	0.973331				84.792
													47.478	1.11644								180.184	3.10689			35.127	0.60569													25.177	0.923971			24.055	0.882795				49.028
													27.664	0.650515								93.488	1.612			27.119	0.467609													20.58	0.755266			26.617	0.976817				95.751
													13.138	0.308938								15.102	0.260402			29.684	0.511837													23.013	0.844554			34.854	1.27911				43.351
													44.118	1.03743								156.178	2.69295			22.994	0.396482													26.26	0.963716			25.62	0.940229				133.628
													29.481	0.693242								74.141	1.2784			28.671	0.49437													23.353	0.857032			25.201	0.924852				49.456
													10.416	0.244931								13.479	0.232416			33.239	0.573135													22.218	0.815379			23.213	0.851894				41.346
													32.126	0.755439								19.61	0.338132			27.687	0.477403													24.411	0.895859			22.31	0.818755				54.573
													30.303	0.712571								14.112	0.243331			30.709	0.529511													22.304	0.818535			26.076	0.956963				47.216
													30.123	0.708338								103.8	1.78981			29.045	0.500819													22.75	0.834902			3.185	0.116886				61.978
													12.375	0.290996								12.83	0.221226			29.366	0.506354													24.267	0.890575			28.802	1.057				46.812
													5.108	0.120114								160.263	2.76339			27.115	0.46754													22.073	0.810057			29.424	1.07983				44.46
													26.849	0.631351								16.164	0.278713			26.439	0.455884													24.179	0.887345			25.868	0.94933				52.553
													23.287	0.547591								170.442	2.93891			40.375	0.69618													23.764	0.872115			27.112	0.994983				62.15
													10.224	0.240416								113.883	1.96367			31.562	0.544219													21.91	0.804075			27.052	0.992781				51.122
													13.455	0.316393								45.961	0.792499			40.005	0.6898													24.585	0.902245			25.418	0.932815				50.706
													20.016	0.470674								120.126	2.07131			31.328	0.540184													21.958	0.805837			20.112	0.73809				67.124
													20.916	0.491837								22.025	0.379774			30.143	0.519751													24.405	0.895639			26.864	0.985882				48.024
													15.911	0.374145								18.145	0.312872			30.906	0.532908													23.763	0.872078			30.667	1.12545				41.642
													21.049	0.494964								24.714	0.42614			31.674	0.54615													19.501	0.715667			22.429	0.823122				63.706
													31.529	0.7414								106.875	1.84283			31.515	0.543408													24.474	0.898171			26.171	0.96045				53.56
													39.4	0.926486								22.322	0.384895			34.501	0.594896													23.526	0.863381			24.82	0.910869				50.541
													23.527	0.553234								95.532	1.64724			35.231	0.607483													37.682	1.38289			30.871	1.13294				69.931
													6.156	0.144758								19.438	0.335167			27.413	0.472678													23.669	0.868629			26.881	0.986506				50.975
													41.592	0.97803								21.693	0.374049			32.228	0.555703													21.018	0.77134			25.954	0.952486				36.124
													13.789	0.324246								43.829	0.755737			29.848	0.514665													27.841	1.02174			34.669	1.27232				46.606
													26.104	0.613832								18.208	0.313958			31.735	0.547202													21.377	0.784515			24.948	0.915567				47.647
													71.822	1.68888								99.221	1.71085			36.137	0.623105													22.241	0.816223			38.66	1.41878				46.663
													24.778	0.582651								14.518	0.250332			34.749	0.599172													20.598	0.755926			26.951	0.989075				53.547
													34.273	0.805925								21.031	0.362634			31.021	0.53489													20.18	0.740586			24.053	0.882721				54.526
													52.974	1.24568								72.27	1.24614			1.708	0.0294508													34.632	1.27096			25.953	0.952449				35.363
													10.577	0.248717								18.35	0.316406			30.275	0.522027													23.651	0.867968			33.095	1.21455				46.013
													24.733	0.581593								26.222	0.452142			31.201	0.537994													28.879	1.05983			29.879	1.09653				42.45
													19.843	0.466605								20.797	0.3586			27.583	0.47561													22.973	0.843086			26.731	0.981001				38.915
													19.728	0.463901								14.916	0.257194			29.666	0.511526													17.075	0.626636			32.844	1.20534				44.731
													60.416	1.42067								27.387	0.47223			30.173	0.520269													23.094	0.847527			30.683	1.12604				60.3
													72.349	1.70128								14.431	0.248832			30.475	0.525476													21.218	0.77868			32.536	1.19404				55.743
													25.876	0.608471								97.794	1.68625			30.596	0.527562													21.193	0.777762			30.525	1.12024				46.96
													33.495	0.78763								24.005	0.413915			22.618	0.389999													20.775	0.762422			27.696	1.01642				96.669
													28.56	0.671585								14.624	0.252159			23.833	0.410949													21.175	0.777101			29.114	1.06845				49.947
													88.114	2.07199								18.801	0.324183			28.138	0.485179													21.445	0.78701			30.062	1.10325				53.845
													39.245	0.922841								14.337	0.247211			19.548	0.337063													16.903	0.620323			31.047	1.13939				44.96
													20.167	0.474224								16.795	0.289594			32.385	0.55841													19.871	0.729246			28.777	1.05609				56.355
													12.716	0.299015								154.655	2.66669			23.285	0.4015													20.599	0.755963			32.65	1.19822				49.557
													37.884	0.890837								19.944	0.343891			31.237	0.538615													17.151	0.629425			29.708	1.09025				51.568
													11.645	0.273831								14.917	0.257212			27.096	0.467212													19.813	0.727117			3.775	0.138539				44.997
													29.924	0.703659								12.537	0.216174			25.793	0.444745													19.211	0.705025			25.578	0.938687				58.35
													33.398	0.785349								108.917	1.87804			5.114	0.0881799													21.48	0.788295			28.486	1.04541				50.144
													49.407	1.1618								84.714	1.46071			31.57	0.544357													20.23	0.742421			25.625	0.940412				63.717
													10.537	0.247776								9.55	0.164669			26.936	0.464453													20.208	0.741614			23.924	0.877987				46.012
													57.846	1.36024								18.952	0.326787			28.643	0.493887													20.06	0.736182			32.558	1.19485				102.233
													15.96	0.375297								130.43	2.24899			21.165	0.364945													19.561	0.717869			30.332	1.11315				116.02
													43.831	1.03068								25.64	0.442107			24.789	0.427433													17.211	0.631627			27.784	1.01965				32.674
													55.333	1.30115								12.414	0.214053			11.846	0.204259													18.216	0.668509			30.624	1.12387				54.79
													12.061	0.283613								186.884	3.22241			30.098	0.518975													20.864	0.765688			33.486	1.2289				41.371
													90.601	2.13047								14.195	0.244762			16.821	0.290042													17.73	0.650673			26.878	0.986396				51.004
													70.694	1.66236								52.684	0.908422			31.078	0.535873													19.783	0.726016			34.049	1.24956				48.305
													79.696	1.87404								101.781	1.75499			26.665	0.459781													23.355	0.857105			30.763	1.12897				48.336
													90.918	2.13792								9.963	0.171791			29.048	0.50087													21.554	0.79101			30.964	1.13635				52.805
													22.905	0.538608								20.687	0.356703			25.247	0.43533													20.163	0.739962			37.643	1.38146				34.008
													14.734	0.346468								105.348	1.8165			34.154	0.588912													18.877	0.692767			28.105	1.03143				42.01
													9.788	0.230163								13.495	0.232692			31.394	0.541322													18.562	0.681207			28.51	1.04629				48.634
													69.175	1.62664								17.729	0.305698			26.204	0.451832													18.057	0.662674			34.822	1.27793				55.334
													88.397	2.07864								21.439	0.369669			26.924	0.464247													17.975	0.659665			27.402	1.00563				57.123
													78.118	1.83693								13.721	0.236589			26.16	0.451073													18.501	0.678968			26.373	0.967863				69.073
													63.085	1.48344								18.663	0.321803			26.284	0.453211													15.802	0.579918			27.056	0.992928				51.161
													79.795	1.87637								22.186	0.38255			27.01	0.465729																	31.537	1.15738				51.916
													105.224	2.47433								17.154	0.295784			1.232	0.0212432																	30.144	1.10625				47.746
													9.297	0.218618								17.834	0.307509			33.055	0.569962																	28.634	1.05084				50.067
													15.424	0.362693								15.392	0.265402			32.586	0.561876																	26.49	0.972157				98.709
													84.866	1.99561								20.593	0.355082			34.69	0.598154																	40.509	1.48664				47.718
													8.707	0.204744								11.866	0.204604			31.613	0.545098																	26.552	0.974432				44.282
													12.704	0.298733								16.705	0.288042			30.993	0.534408																	36.369	1.33471				48.73
													28.938	0.680473								16.759	0.288973			31.131	0.536787																	30.329	1.11304				127.464
													46.425	1.09168								16.144	0.278369			37.281	0.642831																	30.813	1.13081				49.196
													71.612	1.68395								14.725	0.253901			31.298	0.539667																	27.945	1.02555				49.015
													66.209	1.5569								15.489	0.267075			33.522	0.578015																	25.09	0.920778				98.405
													57.81	1.35939								12.26	0.211397			4.773	0.0823001																	1.895	0.0695446				145.889
													22.861	0.537573								16.12	0.277955			9.722	0.167635																	26.058	0.956303				43.528
													40.228	0.945956								40.678	0.701405			28.116	0.4848																	25.031	0.918613				42.646
													1.386	0.0325916								21.938	0.378274			26.786	0.461867																	33.868	1.24292				171.582
													97.767	2.29898								26.608	0.458798			20.026	0.345305																	5.06	0.185697				89.042
													88.315	2.07672								13.8	0.237951			25.904	0.446659																	25.691	0.942834				41.332
													23.787	0.559348								26.158	0.451038			5.695	0.098198																	26.249	0.963312				106.421
													35.913	0.844489								18.188	0.313613			24.68	0.425554																	29.475	1.0817				176.277
													14.361	0.337697								14.654	0.252677			9.011	0.155375																	3.607	0.132373				46.638
													88.671	2.08509								23.414	0.403724			26.783	0.461815																	1.018	0.0373596				69.396
													50.081	1.17765								24.902	0.429381			24.979	0.430709																	24.085	0.883896				42.783
													10.609	0.249469								11.846	0.204259			21.44	0.369687																	27.819	1.02093				185.982
													34.879	0.820175								12.974	0.223709			30.947	0.533614																	5.029	0.184559				48.54
													30.249	0.711301								18.325	0.315975			19.912	0.34334																	25.539	0.937256				44.427
													45.195	1.06275								10.388	0.179119			24.149	0.416398																	26.448	0.970615				47.025
													48.436	1.13897								21.756	0.375135			30.019	0.517613																	13.436	0.493088				79.317
													33.901	0.797177								21.481	0.370394			32.307	0.557065																	25.038	0.91887				68.984
													6.114	0.14377								18.548	0.31982			24.358	0.420001																	21.183	0.777395				44.141
													39.406	0.926627								19.607	0.338081			29.425	0.507371																	24.041	0.882281				78.82
													21.745	0.511331								25.143	0.433537			26.427	0.455677																	34.728	1.27448				39.771
													17.402	0.409206								16.311	0.281248			26.44	0.455901																	4.969	0.182357				49.643
													15.807	0.371699								13.739	0.2369			24.311	0.419191																	32.147	1.17976				105.966
													47.944	1.1274								14.419	0.248625			23.652	0.407828																	4.661	0.171054				41.076
													38.23	0.898973								12.474	0.215087			3.108	0.0535908																	2.708	0.0993809				45.338
													38.841	0.913341								15.491	0.267109			13.621	0.234865																	29.025	1.06519				46.838
													21.074	0.495552								41.106	0.708785			28.288	0.487766																	21.465	0.787744				74.871
													30.009	0.705658								13.253	0.228519			22.64	0.390378																	23.979	0.880005				55.739
													4.799	0.112848								20.55	0.354341			28.163	0.48561																	14.054	0.515768				48.128
													37.516	0.882184								13.583	0.23421			24.635	0.424778																	24.432	0.89663				87.45
													48.503	1.14054								19.617	0.338253			31.204	0.538046																	27.594	1.01267				33.466
													17.057	0.401093								20.011	0.345047			27.554	0.47511																	21.197	0.777909				61.339
													30.343	0.713512								14.699	0.253453			28.488	0.491214																	21.808	0.800332				103.851
													12.268	0.28848								19.331	0.333322			29.353	0.506129																	15.394	0.564944				111.526
													19.297	0.453766								21.676	0.373756			26.888	0.463626																	28.025	1.02849				46.642
													16.387	0.385338								12.231	0.210897			24.929	0.429847																	26.247	0.963239				66.936
													35.881	0.843737								13.814	0.238193			19.162	0.330408																	24.255	0.890134				56.286
													22.579	0.530942								11.038	0.190327			21.203	0.3656																	24.714	0.906979				59.197
													33.753	0.793697								19.552	0.337132			4.767	0.0821967																	21.252	0.779927				88.116
													65.191	1.53296								12.237	0.211001			31.114	0.536494																	25.622	0.940302				156.599
													48.496	1.14038								21.679	0.373808			23.783	0.410087																	21.921	0.804479				44.906
													38.221	0.898762								20.646	0.355996			3.756	0.0647641																	26.526	0.973478				51.097
													11.678	0.274607								18.635	0.321321			27.402	0.472489																	23.422	0.859564				102.97
													27.964	0.65757								19.117	0.329632			25.941	0.447297																	27.81	1.0206				95.885
													30.775	0.72367								111.914	1.92972			28.124	0.484938																	9.553	0.350586				41.554
													42.114	0.990305								22.485	0.387705			29.907	0.515682																	15.184	0.557238				34.142
													35.369	0.831697								19.439	0.335184			28.688	0.494663																	26.706	0.980084				85.17
													61.854	1.45449								18.056	0.311337			23.803	0.410432																	25.289	0.928081				35.439
													29.757	0.699732								25.139	0.433468			18.737	0.323079																	26.881	0.986506				41.407
													29.605	0.696158								25.624	0.441831			26.215	0.452021																	26.464	0.971202				47.872
													18.782	0.441656								30.203	0.520786			27.242	0.46973																	24.075	0.883529				48.56
													68.257	1.60505								106.914	1.8435			25.479	0.439331																	25.578	0.938687				45.558
													73.798	1.73535								187.116	3.22641			25.932	0.447142																	24.115	0.884997				41.619
													32.122	0.755344								17.596	0.303405			25.112	0.433002																	28.671	1.0522				49.98
													30.801	0.724281								90.096	1.55351			24.106	0.415656																	32.941	1.2089				130.13
													22.53	0.52979								161.52	2.78507			22.244	0.38355																	25.134	0.922393				51.206
													39.906	0.938384								18.629	0.321217			27.955	0.482024																	29.129	1.06901				149.359
													36.541	0.859257								180.005	3.1038			30.452	0.525079																	23.298	0.855013				36.896
													37.674	0.885899								17.047	0.293939			28.703	0.494922																	26.513	0.973001				97.972
													37.328	0.877763								18.669	0.321907			24.207	0.417398																	29.3	1.07528				124.724
													33.48	0.787278								117.261	2.02191			30.551	0.526786																	31.742	1.1649				46.567
													38.651	0.908873								180.949	3.12008			25.477	0.439296																	30.725	1.12758				7.649
													72.044	1.6941								97.892	1.68794			28.568	0.492594																	28.462	1.04453				44.972
													73.909	1.73796								19.876	0.342719			26.177	0.451366																	35.306	1.2957				66.316
													53.453	1.25694								39.305	0.67773			16.748	0.288783																	16.489	0.60513				73.905
													39.463	0.927967								55.503	0.95703			23.569	0.406397																	24.985	0.916925				55.444
													49.075	1.15399								64.399	1.11042			10.631	0.183309																	30.788	1.12989				96.748
													47.027	1.10583								75.635	1.30416			28.098	0.48449																	19.771	0.725576				51.911
													58.905	1.38514								12.684	0.218708			32.062	0.55284																	33.993	1.24751				100.101
													21.053	0.495058								17.405	0.300112			24.553	0.423364																	30.225	1.10923				41.564
													41.917	0.985673								11.4	0.196568			23.148	0.399138																	23.325	0.856004				108.428
													18.556	0.436342								103.232	1.78001			24.578	0.423795																	27.61	1.01326				76.097
													82.057	1.92956								15.734	0.271299			23.303	0.40181																	30.71	1.12703				82.297
													58.071	1.36553								11.779	0.203104			17.411	0.300215																	32.941	1.2089				49.094
													67.116	1.57822								19.896	0.343064			25.167	0.433951																	29.61	1.08666				47.031
													27.458	0.645671								14.321	0.246935			26.582	0.458349																	29.354	1.07726				36.233
													26.161	0.615172								12.469	0.215001			27.599	0.475885																	5.278	0.193697				66.247
													71.321	1.6771								105.925	1.82645			24.257	0.41826																	32.51	1.19308				176.969
													55.678	1.30926								21.036	0.362721			25.347	0.437055																	9.569	0.351173				38.362
													18.484	0.434649								14.118	0.243435			26.806	0.462212																	31.566	1.15844				65.239
													39.833	0.936668								15.54	0.267954			30.054	0.518217																	25.033	0.918686				42.252
													18.761	0.441162								13.484	0.232503			19.208	0.331201																	28.71	1.05363				40.631
													7.086	0.166626								97.298	1.67769			26.372	0.454728																	26.412	0.969294				70.824
													24.665	0.579994								42.138	0.726579			30.879	0.532442																	25.585	0.938944				51.231
													25.748	0.605461								12.537	0.216174			6.949	0.119821																	33.002	1.21114				64.859
													34.396	0.808817								16.726	0.288404			26.642	0.459384																	27.455	1.00757				58.505
													75.572	1.77707								21.191	0.365393			30.112	0.519217																	29.497	1.08251				40.92
													28.371	0.66714								90.639	1.56287			21.256	0.366514																	29.03	1.06537				55.362
													38.281	0.900173								198.787	3.42765			23.25	0.400896																	25.858	0.948963				51.112
													46.432	1.09184								89.948	1.55096			27.9	0.481076																	2.921	0.107198				61
													70.098	1.64834								18.703	0.322493			25.106	0.432899																	28.559	1.04809				57.31
													14.365	0.337791								20.843	0.359393			26.203	0.451814																	4.245	0.155787				47.007
													57.816	1.35954								169.611	2.92458			27.459	0.473471																	20.293	0.744733				68.36
													58.047	1.36497								195.459	3.37027			25.165	0.433916																	30.681	1.12596				58.974
													53.318	1.25377								180.446	3.1114			27.219	0.469333																	31.211	1.14541				52.243
													18.936	0.445277								24.02	0.414173			25.089	0.432606																	19.593	0.719044				61.578
													23.557	0.55394								55.167	0.951236			27.308	0.470868																	18.296	0.671445				47.345
													83.657	1.96718								20.525	0.35391			23.31	0.401931																	33.823	1.24127				55.585
													43.666	1.0268								25.521	0.440055			26.755	0.461332																	23.164	0.850096				84.169
													24.838	0.584062								191.777	3.30678			23.473	0.404741																	30.331	1.11312				53.783
													12.221	0.287375								131.313	2.26421			29.228	0.503974																	30.052	1.10288				43.121
													11.403	0.26814								21.135	0.364428			21.998	0.379308																	29.129	1.06901				50.812
													12.04	0.283119								171.661	2.95992			18.914	0.326131																	24.421	0.896226				44.157
													29.941	0.704059								19.827	0.341874			26.045	0.44909																	35.704	1.3103				87.622
													67.364	1.58406								28.375	0.489266			10.245	0.176653																	28.714	1.05378				40.328
													52.048	1.2239								190.475	3.28433			26.874	0.463384																	28.804	1.05708				89.131
													9.071	0.213303								16.158	0.27861			27.723	0.478024																	28.44	1.04372				45.729
													82.397	1.93755								17.99	0.310199			25.239	0.435192																	24.161	0.886685				53.215
													43.325	1.01878								59.981	1.03424			26.058	0.449314																	30.078	1.10383				39.275
													70.441	1.65641								194.302	3.35032			25.745	0.443917																	30.213	1.10879				68.492
													38.468	0.90457								164.522	2.83683			18.203	0.313872																	30.435	1.11693				20.681
													15.806	0.371676								18.54	0.319682			27.513	0.474403																	27.872	1.02287				33.393
													43.89	1.03207								153.524	2.64719			19.671	0.339184																	24.582	0.902135				43.194
													31.595	0.742952								17.043	0.29387			24.656	0.42514																	24.13	0.885547				32.825
													70.727	1.66314								161.892	2.79148			24.37	0.420208																	28.138	1.03264				42.13
													52.173	1.22684								199.894	3.44674			24.101	0.41557																	27.448	1.00731				41.122
													31.224	0.734228								171.965	2.96517			26.688	0.460177																	29.042	1.06581				49.71
													13.362	0.314206								106.621	1.83845			29.03	0.50056																	29.071	1.06688				50.006
													18.264	0.429475								183.327	3.16108			17.369	0.299491																	25.403	0.932265				28.67
													21.396	0.503124								86.704	1.49502			26.276	0.453073																	24.102	0.884519				63.194
													53.185	1.25064								194.707	3.3573			25.327	0.43671																	5.108	0.187459				67.245
													32.926	0.77425								54.291	0.936132			31.754	0.547529																	24.871	0.912741				47.218
													14.747	0.346774								16.923	0.291801			18.747	0.323252																	25.585	0.938944				191.46
													63.299	1.48847								30.939	0.533477			24.385	0.420467																	23.416	0.859344				36.755
													19.284	0.453461								17.33	0.298819			165.651	2.8563																	29.376	1.07807				57.555
													19.608	0.461079								111.203	1.91746			145.946	2.51653																	21.534	0.790276				68.353
													57.214	1.34538								91.888	1.58441			26.152	0.450935																	5.028	0.184523				117.03
													76.063	1.78861								11.452	0.197465			30.27	0.521941																	3.613	0.132594				77.155
													13.948	0.327985								40.376	0.696197			23.073	0.397844																	31.363	1.15099				43.136
													63.563	1.49468								16.919	0.291732			25.404	0.438037																	22.255	0.816736				87.817
													62.392	1.46714								40.69	0.701612			21.603	0.372497																	28.918	1.06126				56.032
													65.96	1.55104								17.702	0.305233			27.855	0.4803																	22.836	0.838058				96.509
													44.277	1.04117								21.115	0.364083			34.638	0.597258																	29.016	1.06486				33.193
													60.32	1.41842								8.005	0.138029			28.602	0.49318																	25.458	0.934283				48.017
													20.435	0.480526								13.281	0.229002			9.324	0.160772																	23.787	0.872959				75.119
													44.949	1.05697								26.714	0.460626																					30.361	1.11422				44.08
													11.814	0.277805								12.092	0.208501																					26.282	0.964523				115.58
													30.389	0.714593								86.42	1.49013																					25.451	0.934026				67.087
													45.905	1.07945								17.842	0.307647																					26.811	0.983937				44.625
													30.52	0.717674								12.889	0.222243																					32.962	1.20967				111.408
													26.955	0.633843								15.911	0.274351																					41.766	1.53277				54.473
													52.114	1.22545								12.566	0.216674																					27.506	1.00944				57.673
													23.49	0.552364								13.948	0.240503																					29.775	1.09271				59.427
													16.616	0.390723								140.111	2.41591																					24.248	0.889877				45.98
													28.54	0.671114								16.713	0.28818																					30.829	1.13139				46.588
													46.172	1.08573								10.104	0.174222																					30.153	1.10659				162.742
													55.978	1.31632								13.516	0.233054																					29.838	1.09502				46.194
													27.995	0.658299																														28.685	1.05271				193.993
													57.131	1.34343																														26.301	0.965221				46.081
													69.125	1.62547																														27.022	0.991681				38.418
													67.441	1.58587																														32.107	1.17829				42.433
													32.146	0.755909																														25.357	0.930577				145.61
													23.154	0.544463																														36.464	1.33819				40.419
													59.091	1.38952																														30.753	1.1286				60.059
													54.312	1.27714																														21.006	0.770899				41.465
													69.871	1.64301																														22.24	0.816186				188.936
													22.427	0.527368																														24.518	0.899786				181.468
													27.125	0.637841																														28.48	1.04519				61.819
													41.86	0.984332																														25.55	0.93766				192.552
													35.755	0.840774																														33.357	1.22417				38.892
													37.608	0.884347																														29.875	1.09638				178.526
													47.869	1.12563																														33.208	1.2187				35.558
													43.658	1.02661																														30.267	1.11077				51.502
													54.436	1.28006																														30.127	1.10563				70.478
													45.576	1.07171																														31.451	1.15422				46.539
													21.281	0.50042																														33.996	1.24762				55.682
													62.816	1.47711																														31.711	1.16376				51.165
													31.365	0.737544																														36.771	1.34946				28.837
													52.721	1.23973																														36.344	1.33379				43.088
													52.785	1.24123																																			38.743
													19.167	0.450709																																			48.336
													26.979	0.634408																																			28.04
													50.933	1.19768																																			30.062
													60.447	1.4214																																			58.691
													45.588	1.072																																			42.312
													42.033	0.9884																																			52.208
													7.872	0.185109																																			39.395
													83.165	1.95561																																			92.55
													44.974	1.05756																																			47.837
													77.63	1.82546																																			41.768
													50.163	1.17958																																			38.284
													56.392	1.32605
													51.695	1.2156
													48.768	1.14677
													43.303	1.01826
													43.999	1.03463
													13.758	0.323518
													55.79	1.31189
													32.372	0.761223
													28.847	0.678333
													87.975	2.06872
													43.913	1.03261
													38.075	0.895328
													15.644	0.367867
													35.897	0.844113
													98.928	2.32628
													75.231	1.76905
													36.469	0.857564
													52.66	1.23829
													73.285	1.72329
													38.945	0.915786
													40.157	0.944286
													49.533	1.16476
													73.507	1.72851
													40.338	0.948543
													21.24	0.499456
													52.813	1.24189
													40.253	0.946544
													26.303	0.618511
													33.447	0.786502
													19.636	0.461738
													53.467	1.25727
													60.605	1.42512
													66.229	1.55737
													56.327	1.32452
													103.623	2.43668
													70.982	1.66913
													25.254	0.593844
													21.012	0.494094
													16.866	0.396602
													57.116	1.34308
													45.813	1.07729
													22.132	0.520431
													49.801	1.17106
													30.406	0.714993
													55.575	1.30684
													17.592	0.413674
													17.643	0.414873
													53.307	1.25351
													60.67	1.42665
													9.675	0.227506
													26.923	0.633091
													44.024	1.03522
													42.896	1.00869
													54.065	1.27133
													88.147	2.07276
													25.542	0.600617
													53.471	1.25736
													80.566	1.8945
													52.225	1.22806
													64.248	1.51078
													46.01	1.08192
													28.019	0.658863
													41.301	0.971187
													39.351	0.925333
													51.659	1.21475
													86.046	2.02336
													57.604	1.35455
													41.057	0.96545
													39.579	0.930695
													59.743	1.40485
													20.648	0.485535
													17.012	0.400035
													19.926	0.468557
													61.955	1.45686
													37.155	0.873695
													52.205	1.22759
													42.124	0.99054
													36.119	0.849333
													41.554	0.977137
													6.198	0.145745
													46.291	1.08853
													64	1.50495
													40.807	0.959571
													47.913	1.12667
													68.13	1.60207
													25.593	0.601816
													62.927	1.47972
													63.989	1.50469
													48.415	1.13847
													41.77	0.982216
													22.956	0.539807
													20.105	0.472766
													12.329	0.289915
													24	0.564357
													48.335	1.13659
													10.547	0.248011
													10.467	0.24613
													11.69	0.274889
													24.052	0.56558
													38.754	0.911295
													50.659	1.19124
													13.837	0.325375
													97.257	2.28699
													82.641	1.94329
													56.825	1.33623
													21.491	0.505358
													10.707	0.251774
													9.032	0.212386
													43.667	1.02682
													20.568	0.483654
													38.759	0.911413
													36.976	0.869486
													20.861	0.490544
													37.903	0.891284
													60.596	1.42491
													9.711	0.228353
													8.031	0.188848
													48.564	1.14198
													60.449	1.42145
													45.288	1.06494
													9.312	0.21897
													48.401	1.13814
													39.081	0.918984
													8.516	0.200253
													67.729	1.59264
													39.195	0.921665
													23.854	0.560924
													42.933	1.00956
													40.761	0.958489
													14.811	0.348279
													19.394	0.456047
													81.512	1.91674
													18.276	0.429758
													30.804	0.724352
													80.274	1.88763
													47.177	1.10936
													18.284	0.429946
													5.43	0.127686
													24.338	0.572305
													20.793	0.488945
													27.724	0.651926
													10.542	0.247894
													16.084	0.378213
													41.644	0.979253
													54.294	1.27672
													28.918	0.680003
													60	1.41089
													99.579	2.34159
													39.793	0.935727
													45.859	1.07837
													51.578	1.21285
													35.726	0.840092
													20.912	0.491743
													24.357	0.572752
													64.388	1.51408
													58.292	1.37073
													17.118	0.402527
													34.876	0.820104
													53.601	1.26042
													45.854	1.07825
													45.866	1.07853
													12.257	0.288222
													25.861	0.608118
													30.208	0.710337
													23.093	0.543029
													58.879	1.38453
													3.955	0.0930013
													10.294	0.242062
													8.796	0.206837
													53.028	1.24695
													14.475	0.340378
													46.345	1.0898
													39.309	0.924346
													31.444	0.739401
													11.546	0.271503
													52.868	1.24318
													18.109	0.425831
													27.741	0.652326
													60.735	1.42818
													34.921	0.821163
													52.32	1.2303
													49.1	1.15458
													52.428	1.23284
													51.829	1.21875
													59.393	1.39662
													48.584	1.14245
													35.496	0.834684
													35.519	0.835224
													47.974	1.1281
													28.04	0.659357
													45.605	1.0724
													41.326	0.971775
													21.762	0.51173
													57.382	1.34933
													17.63	0.414567
													72.937	1.7151
													18.132	0.426372
													28.514	0.670503
													47.758	1.12302
													47.222	1.11042
													50.598	1.18981
													19.698	0.463196
													40.026	0.941206
													37.711	0.886769
													79.129	1.86071
													55.167	1.29724
													37.795	0.888744
													43.218	1.01627
													48.677	1.14463
													43.945	1.03336
													20.509	0.482266
													16.7	0.392698
													30.256	0.711466
													41.704	0.980664
													69.649	1.63779
													42.412	0.997312
													18.197	0.4279
													15.655	0.368125
													59.963	1.41002
													34.195	0.804091
													78.41	1.8438
													56.375	1.32565
													24.469	0.575385
													60.447	1.4214
													37.474	0.881196
													54.756	1.28758
													55.203	1.29809
													56.723	1.33383
													69.906	1.64383
													37.419	0.879903
													46.088	1.08375
													67.207	1.58036
													34.62	0.814085
													73.023	1.71713
													80.594	1.89516
													32.033	0.753252
													24.213	0.569365
													41.467	0.975091
													42.229	0.993009
													53.203	1.25106
													27.007	0.635066
													44.976	1.0576
													31.407	0.738531
													41.79	0.982686
													26.647	0.626601
													13.267	0.311972
													104.928	2.46737
													45.241	1.06384
													34.569	0.812885
													42.669	1.00336
													45.307	1.06539
													47.089	1.10729
													97.468	2.29195
													47.159	1.10894
													46.211	1.08665
													114.319	2.6882
													93.29	2.1937
													58.909	1.38524
													8.217	0.193222
													98.36	2.31292
													65.007	1.52863
													75.491	1.77516
													73.718	1.73347
													65.938	1.55052
													79.978	1.88067
													52.862	1.24304
													44.19	1.03912
													81.293	1.91159
													79.389	1.86682
													124.469	2.92687
													97.718	2.29783
													20.194	0.474859
													44.739	1.05203
													57.505	1.35222
													72.963	1.71572
													69.525	1.63487
													36.275	0.853002
													47.18	1.10943
													57.881	1.36106
													54.617	1.28431
													56.077	1.31864
													47.051	1.1064
													47.3	1.11225
													55.745	1.31084
													40.563	0.953833
													28.586	0.672196
													71.685	1.68566
													49.276	1.15872
													54.108	1.27234
													42.698	1.00404
													56.452	1.32746
													58.383	1.37287
													38.233	0.899044
													37.589	0.8839
													72.095	1.6953
													45.138	1.06141
													30.477	0.716663
													57.365	1.34893
													47.718	1.12208
													44.712	1.0514
													31.352	0.737238
													37.352	0.878327
													28.476	0.669609
													59.331	1.39516
													65.764	1.54643
													55.521	1.30557
													58.774	1.38206
													68.642	1.61411
													33.357	0.784385
													13.191	0.310185
													51.627	1.214
													9.302	0.218735
													33.616	0.790476
													12.997	0.305623
													92.797	2.18211
													21.607	0.508086
													62.084	1.4599
													77.114	1.81333
													51.082	1.20119
													83.542	1.96448
													80.028	1.88185
													65.035	1.52929
													33.542	0.788736
													33.97	0.7988
													56.598	1.33089
													13.927	0.327492
													57.357	1.34874
													12.575	0.295699
													51.453	1.20991
													50.24	1.18139
													31.49	0.740483
													47.72	1.12213
													10.409	0.244766
													62.158	1.46164
													51.077	1.20107
													55.827	1.31276
													97.185	2.28529
													39.787	0.935586
													41.734	0.981369
													65.008	1.52865
													16.089	0.378331
													23.67	0.556597
													64.016	1.50533
													112.575	2.64719
													14.416	0.33899
													98.865	2.3248
													35.43	0.833132
													57.86	1.36057
													96.752	2.27511
													74.636	1.75506
													70.142	1.64938
													71.405	1.67908
													61.458	1.44518
													36.921	0.868192
													31.385	0.738014
													68.491	1.61056
													31.745	0.746479
													19.341	0.454801
													93.37	2.19558
													43.044	1.01217
													46.592	1.0956
													54.576	1.28335
													31.811	0.748031
													20.771	0.488427
													45.92	1.0798
													24.075	0.56612
													61.239	1.44003
													54.95	1.29214
													46.535	1.09426
													44.118	1.03743
													90.146	2.11977
													70.761	1.66394
													51.049	1.20041
													47.572	1.11865
													50.088	1.17781
													54.252	1.27573
													25.682	0.603909
													48.265	1.13494
													67.361	1.58398
													51.783	1.21767
													65.258	1.53453
													65.226	1.53378
													59.707	1.404
													54.396	1.27911
													41.092	0.966273
													5.327	0.125264
													47.816	1.12439
													33.55	0.788924
													13.02	0.306164
													5.012	0.117857
													42.276	0.994114
													31.247	0.734769
													11.994	0.282037
													20.454	0.480973
													45.3	1.06522
													39.896	0.938149
													12.493	0.293771
													7.6	0.178713
													35.88	0.843713
													5.956	0.140055
													26.111	0.613997
													66.224	1.55725
													23.491	0.552388
													35.665	0.838658
													37.511	0.882066
													42.621	1.00223
													31.124	0.731877
													80.168	1.88514
													31.561	0.742153
													43.379	1.02005
													13.608	0.31999
													15.896	0.373792
													3.855	0.0906498
													40.658	0.956067
													34.388	0.808629
													26.951	0.633749
													63.922	1.50312
													48.475	1.13988
													61.834	1.45402
													32.51	0.764468
													51.59	1.21313
													53.532	1.2588
													63.598	1.4955
													43.071	1.01281
													84.405	1.98477
													24.13	0.567414
													38.27	0.899914
													61.074	1.43615
													54.947	1.29207
													37.477	0.881267
													35.967	0.845759
													56.724	1.33386
													25.585	0.601628
													98.207	2.30932
													70.518	1.65822
													64.87	1.52541
													41.038	0.965003
													54.643	1.28492
													45.299	1.0652
													43.261	1.01728
													64.869	1.52539
													64.338	1.5129
													75.926	1.78539
													69.17	1.62652
													35.692	0.839293
													48.132	1.13182
													80.072	1.88288
													71.076	1.67134
													20.322	0.477869
													13.889	0.326598
													26.93	0.633255
													11.835	0.278298
													110.333	2.59447
													53.185	1.25064
													28.12	0.661238
													79.245	1.86344
													13.199	0.310373
													15.346	0.360859
													36.698	0.862949
													61.539	1.44708
													47.523	1.1175
													45.378	1.06706
													49.64	1.16728
													26.634	0.626295
													16.746	0.39378
													62.341	1.46594
													23.38	0.549778
													26.356	0.619758
													34.334	0.807359
													49.379	1.16114
													41.582	0.977795
													73.788	1.73511
													42.185	0.991975
													30.035	0.706269
													43.634	1.02605
													38.9	0.914728
													18.732	0.44048
													44.085	1.03665
													18.303	0.430393
													13.935	0.32768
													57.018	1.34077
													28.492	0.669986
													21.151	0.497363
													20.656	0.485723
													36.19	0.851003
													10.79	0.253725
													45.28	1.06475
													38.8	0.912377
													56.507	1.32875
													71.764	1.68752
													31.687	0.745116
													42.697	1.00401
													41.78	0.982451
													45.55	1.0711
													40.729	0.957737
													73.369	1.72526
													50.063	1.17722
													29.778	0.700226
													46.06	1.08309
													20.639	0.485323
													14.728	0.346327
													41.553	0.977113
													31.829	0.748455
													37.068	0.871649
													112.107	2.63618
													92.382	2.17235
													88.698	2.08572
													33.194	0.780552
													54.637	1.28478
													62.605	1.47215
													79.998	1.88114
													47.175	1.10931
													22.6	0.531436
													53.283	1.25294
													30.869	0.72588
													47.952	1.12758
													104.963	2.46819
													16.421	0.386138
													16.749	0.39385
													35.805	0.84195
													15.316	0.360154
													43	1.01114
													17.838	0.419458
													66.901	1.57317
													67.888	1.59638
													7.798	0.183369
													86.961	2.04488
													60.217	1.41599
													90.591	2.13024
													35.813	0.842138
													93.372	2.19563
													47.553	1.1182
													61.517	1.44656
													23.691	0.557091
													101.898	2.39612
													35.694	0.83934
													40.117	0.943346
													115.206	2.70905
													38.047	0.89467
													54.7	1.28626
													79.783	1.87609
													80.893	1.90219
													65.495	1.54011
													53.851	1.2663
													61.859	1.45461
													70.759	1.66389
													58.916	1.3854
													72.475	1.70424
													73.296	1.72355
													31.072	0.730654
													64.773	1.52313
													67.724	1.59252
													25.688	0.60405
													64	1.50495
													75.991	1.78692
													50.496	1.18741
													24.75	0.581993
													64.759	1.5228
													83.906	1.97304
													39.192	0.921595
													69.781	1.64089
													22.897	0.53842
													32.088	0.754545
													31.06	0.730372
													54.052	1.27103
													76.93	1.809
													26.121	0.614232
													19.485	0.458187
													87.396	2.05511
													62.935	1.47991
													51.696	1.21562
													77.186	1.81502
													68.138	1.60226
													60.922	1.43257
													37.165	0.87393
													34.482	0.81084
													31.487	0.740413
													47.318	1.11268
													61.206	1.43925
													57.427	1.35039
													55.511	1.30533
													60.854	1.43097
													34.303	0.80663
													34.447	0.810017
													30.456	0.716169
													30.547	0.718309
													40.512	0.952634
													45.476	1.06936
													81.542	1.91745
													36.628	0.861302
													42.284	0.994303
													22.611	0.531695
													48.795	1.14741
													52.724	1.2398
													41.972	0.986966
													55.158	1.29703
													32.762	0.770394
													63.804	1.50034
													69.353	1.63083
													79.557	1.87077
													26.716	0.628223
													96.894	2.27845
													20.583	0.484006
													26.633	0.626271
													15.345	0.360836
													21.224	0.499079
													56.576	1.33038
													33.773	0.794168
													41.394	0.973374
													14.51	0.341201
													46.219	1.08683
													46.676	1.09758
													36.42	0.856411
													41.081	0.966014
													58.684	1.37995
													42.626	1.00234
													88.396	2.07862
													39.291	0.923923
													37.351	0.878304
													27.585	0.648658
													34.455	0.810205
													31.823	0.748314
													56.091	1.31897
													15.049	0.353875
													55.979	1.31634
													62.381	1.46688
													56.409	1.32645
													22.135	0.520502
													39.9	0.938243
													13.704	0.322248
													35.501	0.834801
													24.666	0.580018
													58.398	1.37322
													34.065	0.801034
													37.253	0.875999
													48.01	1.12895
													44.526	1.04702
													34.46	0.810322
													52.28	1.22936
													40.209	0.945509
													57.101	1.34272
													16.245	0.381999
													46.315	1.08909
													43.872	1.03164
													38.845	0.913435
													36.368	0.855189
													53.022	1.24681
													32.222	0.757696
													36.363	0.855071
													24.228	0.569718
													17.843	0.419576
													41.802	0.982968
													30.358	0.713864
													23.529	0.553281
													52.741	1.2402
													32.803	0.771358
													12.656	0.297604
													46.949	1.104
													42.358	0.996043
													41.341	0.972128
													31.353	0.737262
													22.575	0.530848
													67.548	1.58838
													54.507	1.28172
													41.69	0.980335
													52.344	1.23086
													79.414	1.86741
													9.579	0.225249
													9.541	0.224355
													43.407	1.02071
													24.872	0.584862
													15.828	0.372193
													21.32	0.501337
													53.035	1.24711
													35.167	0.826947
													34.821	0.818811
													43.998	1.03461
													9.843	0.231457
													22.301	0.524405
													11.843	0.278487
													37.62	0.884629
													59.63	1.40219
													16.557	0.389336
													55.926	1.31509
													18.199	0.427947
													47.248	1.11103
													58.917	1.38543
													27.981	0.657969
													26.869	0.631821
													33.004	0.776085
													36.896	0.867604
													47.65	1.12048
													43.743	1.02861
													53.498	1.258
													18.245	0.429029
													42.47	0.998676
													17.583	0.413462
													10.701	0.251633
													10.402	0.244602
													40.661	0.956138
													50.106	1.17824
													68.31	1.6063
													60.48	1.42218
													59.223	1.39262
													20.546	0.483136
													51.128	1.20227
													20.475	0.481467
													35.8	0.841832
													51.399	1.20864
													35.863	0.843314
													44.184	1.03898
													23.066	0.542394
													21.036	0.494659
													47.888	1.12608
													25.922	0.609552
													18.256	0.429287
													21.729	0.510954
													45.704	1.07472
													48.868	1.14912
													52.363	1.23131
													37.509	0.882019
													48.305	1.13589
													61.942	1.45656
													47.996	1.12862
													25.361	0.59636
													24.305	0.571529
													52.911	1.2442
													74.805	1.75903
													54.515	1.28191
													50.281	1.18235
													42.183	0.991928
													22.865	0.537667
													11.964	0.281332
													51.298	1.20627
													33.652	0.791322
													43.757	1.02894
													59.573	1.40085
													33.271	0.782363
													20.676	0.486193
													12.697	0.298568
													47.022	1.10572
													29.94	0.704035
													66.255	1.55798
													49.046	1.15331
													40.472	0.951694
													60.829	1.43039
													61.854	1.45449
													38.558	0.906686
													31.179	0.73317
													60.539	1.42357
													18.566	0.436577
													52.952	1.24516
													48.323	1.13631
													33.083	0.777942
													30.109	0.708009
													46.464	1.09259
													78.342	1.8422
													16.119	0.379036
													88.492	2.08088
													35.084	0.824996
													51.65	1.21454
													61.245	1.44017
													62.357	1.46632
													52.428	1.23284
													61.163	1.43824
													58.775	1.38209
													48.979	1.15173
													21.003	0.493883
													36.393	0.855776
													44.036	1.0355
													38.347	0.901725
													78.922	1.85584
													84.84	1.995
													55.74	1.31072
													34.582	0.813191
													43.828	1.03061
													90.912	2.13778
													41.477	0.975326
													65.399	1.53785
													42.175	0.991739
													51.102	1.20166
													59.276	1.39387
													63.444	1.49188
													98.924	2.32618
													33.402	0.785444
													112.204	2.63846
													74.567	1.75343
													103.178	2.42622
													43.322	1.01871
													135.631	3.18934
													66.491	1.56353
													58.374	1.37266
													114.819	2.69995
													60.578	1.42448
													49.915	1.17374
													92.781	2.18173
													61.536	1.44701
													8.365	0.196702
													11.692	0.274936
													16.308	0.38348
													36.082	0.848463
													60.118	1.41367
													28.487	0.669868
													41.23	0.969518
													18.821	0.442573
													58.147	1.36732
													69.972	1.64538
													31.029	0.729643
													38.489	0.905064
													19.764	0.464748
													116.682	2.74376
													36.585	0.860291
													89.726	2.10989
[truncated: 11 more columns]

## Sheet: F6F
T, SOX2 and GATA6 level analysis in hESCs cultured in Mesoderm induction medium conditioned on YSLCs
units= fluorescence intensity (a.u.)
		Exp 1	18.1126	83.1251	1	1			42.3006	3.92433	2.33543	0.0472099			17.0831	39.3749	0.943163	0.473682				Exp 2	13.0811	69.7747	1	1			64.6543	3.19799	4.94256	0.0458331			21.1801	48.2914	1.61914	0.692105			Exp 3	24.158	128.724	1	1			53.1719	7.2781
		Control	T	SOX2	rel T	rel SOX2		+ MESOI	T	SOX2	rel T	rel SOX2		+ MESOI + YSLC CM	T	SOX2	rel T	rel SOX2				Control	T	SOX2	rel T	rel SOX2		+ MESOI	T	SOX2	rel T	rel SOX2		+ MESOI + YSLC CM	T	SOX2	rel T	rel SOX2			Control	T	SOX2	rel T	rel SOX2		+ MESOI	T	SOX2
			19.647	93.374	1.08471	1.1233			11.917	4.918	0.65794	0.0591639			18.093	52.384	0.998918	0.630183					13.712	74.982	1.04823	1.07463			22.629	0.456	1.72989	0.00653532			14.117	33.901	1.07919	0.485864				9.638	49.564	0.398957	0.385042			21.336	1.947
			18.404	100.49	1.01609	1.2089			9.906	14.945	0.546912	0.179789			16.344	43.744	0.902355	0.526243					12.007	64.093	0.917886	0.91857			50.85	0.695	3.88727	0.00996062			14.263	49.798	1.09035	0.713697				15.076	81.987	0.624059	0.636922			45.825	0.965
			20.7	103.27	1.14285	1.24234			13.43	4.163	0.741473	0.0500812			13.302	29.482	0.734406	0.35467					12.271	79.066	0.938068	1.13316			10.611	10.723	0.811167	0.15368			16.722	49.898	1.27833	0.71513				16.873	85.283	0.698445	0.662528			12.498	1.76
			18.378	91.424	1.01465	1.09984			11.219	0.559	0.619403	0.00672481			16.826	51.746	0.928966	0.622508					10.186	70.241	0.778678	1.00668			10.473	10.304	0.800618	0.147675			13.083	30.798	1.00014	0.441392				11	50.472	0.455336	0.392096			30.301	1.047
			21.164	109.116	1.16847	1.31267			13.198	21.356	0.728664	0.256914			14.895	30.928	0.822355	0.372066					9.241	63.569	0.706437	0.91106			19.878	1.369	1.51959	0.0196203			14.833	34.489	1.13392	0.494291				17.732	91.034	0.734002	0.707205			19.689	0.968
			18.82	93.558	1.03906	1.12551			82.771	2.446	4.5698	0.0294255			13.979	29.982	0.771783	0.360685					14.721	76.546	1.12536	1.09704			170.447	0.632	13.03	0.00905772			16.215	46.786	1.23957	0.670529				17.698	102.257	0.732595	0.794391			20.37	0.766
			22.284	102.238	1.2303	1.22993			17.59	0.83	0.971147	0.00998495			20.134	39.158	1.1116	0.471073					15.189	86.213	1.16114	1.23559			15.404	0.431	1.17757	0.00617702			16.541	47.311	1.26449	0.678053				18.233	105.731	0.754741	0.82138			43.512	1.219
			19.906	99.642	1.09901	1.1987			13.706	21.533	0.756711	0.259043			14.422	40.432	0.796241	0.4864					11.756	59.974	0.898698	0.859537			17.264	1.124	1.31976	0.016109			12.134	28.568	0.927595	0.409432				12.182	73.032	0.504264	0.567355			39.96	0.705
			18.871	105.891	1.04187	1.27388			13.932	11.052	0.769188	0.132956			19.414	46.177	1.07185	0.555512					13.908	84.108	1.06321	1.20542			11.502	7.233	0.879281	0.103662			17.228	51.114	1.31701	0.732557				17.783	100.635	0.736113	0.781791			25.845	0.778
			21.067	110.901	1.16311	1.33415			13.198	20.468	0.728664	0.246231			16.833	28.64	0.929353	0.344541					11.39	64.774	0.870719	0.92833			21.877	0.489	1.67241	0.00700827			15.598	59.882	1.1924	0.858219				16.598	99.539	0.687061	0.773276			26.909	0.853
			19.77	88.342	1.0915	1.06276			15.082	24.377	0.83268	0.293257			20.208	46.639	1.11569	0.56107					12.848	64.599	0.982177	0.925822			32.295	0.573	2.46882	0.00821214			15.397	29.147	1.17704	0.41773				18.968	118.693	0.785166	0.922076			42.823	0.814
			19.654	95.3	1.0851	1.14647			10.566	15.294	0.583351	0.183988			16.881	55.132	0.932003	0.663242					12.331	81.42	0.942654	1.1669			19.803	1.151	1.51386	0.0164959			16.648	29.119	1.27267	0.417329				16.198	79.976	0.670504	0.6213			14.212	3.293
			13.423	46.658	0.741086	0.561299			16.466	1.34	0.909091	0.0161203			19.646	38.64	1.08466	0.464842					9.752	52.142	0.7455	0.74729			12.079	1.81	0.92339	0.0259406			16.344	48.275	1.24943	0.691869				18.256	98.539	0.755693	0.765508			19.788	0.797
			18.643	92.575	1.02928	1.11368			15.402	4.72	0.850347	0.0567819			19.951	31.608	1.1015	0.380246					12.538	62.487	0.958479	0.895553			47.928	0.567	3.6639	0.00812615			18.267	38.969	1.39644	0.558497				18.142	109.158	0.750974	0.848002			70.48	0.932
			18.124	82.793	1.00063	0.996005			11.405	16.608	0.629672	0.199795			16.596	49.928	0.916268	0.600637					13.541	78.213	1.03515	1.12094			23.393	0.395	1.7883	0.00566107			13.455	25.22	1.02858	0.361449				17.422	97.627	0.72117	0.758423			63.179	0.873
			3.635	0.968	0.200689	0.0116451			13.922	11.471	0.768636	0.137997			15.522	33.505	0.856972	0.403067					14.174	74.212	1.08354	1.06359			23.06	1.138	1.76284	0.0163096			16.156	36.397	1.23506	0.521636				17.499	98.156	0.724357	0.762533			12.636	5.208
			20.114	117.483	1.1105	1.41333			13.865	5.223	0.765489	0.062833			17.269	49.069	0.953424	0.590303					15.25	84.639	1.1658	1.21303			41.002	0.399	3.13443	0.0057184			16.596	44.986	1.2687	0.644732				10.749	49.549	0.444946	0.384925			24.606	0.699
			12.967	45.867	0.71591	0.551783			54.033	0.747	2.98317	0.00898646			15.436	35.732	0.852224	0.429858					8.375	39.254	0.640234	0.562582			22.704	0.355	1.73563	0.0050878			10.139	18.012	0.775085	0.258145				16.125	79.281	0.667482	0.615901			56.82	1.208
			20.601	97.977	1.13738	1.17867			135.789	1.205	7.49693	0.0144962			17.992	46.345	0.993341	0.557533					14.809	81.028	1.13209	1.16128			15.918	1.402	1.21687	0.0200932			19.029	78.57	1.45469	1.12605				18.159	108.002	0.751678	0.839022			78.073	0.978
			20.262	97.239	1.11867	1.16979			34.528	0.78	1.9063	0.00938345			16.411	39.403	0.906054	0.474021					9.915	54.405	0.757961	0.779723			20.155	0.732	1.54077	0.0104909			18.335	51.255	1.40164	0.734578				18.194	94.694	0.753126	0.735638			39.756	1.305
			21.004	109.389	1.15963	1.31596			40.725	0.491	2.24843	0.00590676			15.75	47.228	0.86956	0.568156					13.645	76.97	1.0431	1.10312			52.768	0.456	4.0339	0.00653532			19.33	54.831	1.4777	0.785829				20.618	112.509	0.853466	0.874035			14.579	3.57
			19.622	95.05	1.08333	1.14346			32.614	1.116	1.80062	0.0134256			16.217	34.434	0.895343	0.414243					11.596	55.18	0.886467	0.790831			24.925	0.507	1.90541	0.00726624			18.225	53.799	1.39323	0.771038				21.908	128.161	0.906865	0.995629			12.557	0.979
			20.568	114.982	1.13556	1.38324			17.469	2.381	0.964466	0.0286436			16.683	43.967	0.921071	0.528926					11.742	68.12	0.897628	0.976285			52.128	0.422	3.98497	0.00604803			18.528	63.9	1.41639	0.915804				14.525	69.759	0.601251	0.541928			32.071	0.709
			19.983	97.184	1.10326	1.16913			22.854	3.027	1.26177	0.036415			15.851	36.246	0.875136	0.436042					11.719	69.284	0.89587	0.992967			22.678	0.336	1.73364	0.0048155			19.39	66.425	1.48229	0.951992				19.133	115.562	0.791996	0.897752			74.572	1.03
			20.762	105.563	1.14627	1.26993			42.91	0.891	2.36907	0.0107188			15.281	27.613	0.843667	0.332186					14.295	73.068	1.09279	1.0472			17.557	0.908	1.34216	0.0130133			18.176	53.87	1.38948	0.772056				19.701	112.527	0.815508	0.874175			34.602	1.088
			20.15	93.829	1.11248	1.12877			14.323	23.034	0.790775	0.277101			15.484	37.689	0.854874	0.453401					10.016	56.176	0.765682	0.805105			161.29	0.755	12.33	0.0108205			15.804	60.763	1.20815	0.870845				18.834	92.113	0.779619	0.715587			13.66	6.133
			18.983	90.77	1.04805	1.09197			29.244	6.205	1.61457	0.0746466			13.755	19.994	0.759416	0.240529					3.278	1.105	0.25059	0.0158367			14.249	0.412	1.08928	0.00590472			15.444	47.037	1.18063	0.674126				15.588	66.829	0.645253	0.519166			15.761	5.972
			21.412	100.422	1.18216	1.20808			50.449	0.753	2.7853	0.00905864			12.817	13.697	0.707629	0.164776					13.663	72.628	1.04448	1.04089			20.501	0.753	1.56722	0.0107919			20.422	62.676	1.56118	0.898262				19.56	93.319	0.809671	0.724956			24.322	0.692
			23.112	105.029	1.27602	1.26351			108.754	3.1	6.00433	0.0372932			15.778	31.663	0.871106	0.380908					14.086	82.367	1.07682	1.18047			57.574	0.872	4.4013	0.0124974			16.555	45.397	1.26556	0.650622				14.382	72.182	0.595332	0.560751			33.059	0.774
			21.432	113.814	1.18326	1.36919			33.654	0.532	1.85804	0.00639999			15.309	29.509	0.845212	0.354995					14.473	75.84	1.1064	1.08693			44.269	0.473	3.38418	0.00677896			17.991	53.497	1.37534	0.76671				19.968	112.572	0.82656	0.874524			86.974	1.021
			21.748	106.629	1.20071	1.28275			43.702	0.722	2.41279	0.00868571			12.459	13.902	0.687863	0.167242					9.52	53.991	0.727765	0.77379			15.808	1.507	1.20846	0.0215981			17.847	51.32	1.36433	0.73551				20.414	111.227	0.845022	0.864076			32.851	0.834
			20.264	98.152	1.11878	1.18077			37.323	1.042	2.06061	0.0125353			14.812	39.623	0.817773	0.476667					15.537	77.458	1.18774	1.11012			114.812	0.958	8.77691	0.0137299			15.721	26.743	1.20181	0.383276				20.846	125.229	0.862904	0.972851			27.184	0.739
			20.965	117.667	1.15748	1.41554			14.734	0.667	0.813467	0.00802405			15.034	25.865	0.83003	0.311158					13.132	64.452	1.00389	0.923715			16.948	0.807	1.29561	0.0115658			19.052	58.298	1.45645	0.835517				12.639	55.552	0.523182	0.43156			12.397	1.488
			16.984	71.15	0.937689	0.855939			17.119	3.897	0.945143	0.0468812			15.591	49.158	0.860782	0.591374					14.26	73.675	1.09012	1.0559			22.712	0.846	1.73624	0.0121247			17.359	1.463	1.32702	0.0209675				19.234	100.354	0.796176	0.779608			21.91	1.066
			22.437	120.93	1.23875	1.4548			48.088	4.314	2.65495	0.0518977			16.963	48.858	0.93653	0.587765					14.489	98.864	1.10762	1.4169			12.74	0.711	0.973921	0.0101899			18.385	51.483	1.40546	0.737846				12.784	55.771	0.529184	0.433261			14.389	8.426
			20.835	100.221	1.1503	1.20567			46.178	0.634	2.54949	0.00762706			15.335	35.512	0.846648	0.427212					11.737	67.413	0.897246	0.966152			177.875	0.642	13.5978	0.00920104			17.313	43.058	1.32351	0.6171				18.598	109.399	0.76985	0.849875			14.157	2.589
			2.511	1.447	0.138633	0.0174075			41.903	1.645	2.31347	0.0197895			14.32	47.185	0.79061	0.567639					14.105	66.268	1.07827	0.949742			63.452	0.642	4.85065	0.00920104			16.898	51.178	1.29178	0.733475				13.87	68.54	0.574138	0.532458			13.933	1.988
			22.119	109.205	1.22119	1.31374			33.557	0.484	1.85269	0.00582255			19.021	30.346	1.05015	0.365064					12.237	63.175	0.935469	0.905414			61.286	0.579	4.68506	0.00829813			19.597	65.595	1.49811	0.940097				17.57	85.63	0.727296	0.665223			25.335	0.791
			19.939	100.584	1.10084	1.21003			34.683	0.43	1.91485	0.00517293			22.926	33.724	1.26575	0.405702					13.686	77.231	1.04624	1.10686			81.364	0.511	6.21994	0.00732357			21.914	64.438	1.67524	0.923515				16.892	95.135	0.699231	0.739064			23.786	0.537
			16.539	78.477	0.913121	0.944083			23.458	6.903	1.29512	0.0830435			15.218	41.672	0.840188	0.501317					10.839	63.441	0.828597	0.909226			19.151	0.669	1.46402	0.009588			18.354	58.439	1.40309	0.837538				16.425	78.929	0.6799	0.613166			20.12	0.793
			19.459	100.16	1.07433	1.20493			19.064	2.332	1.05253	0.0280541			18.695	23.167	1.03215	0.278701					10.669	63.433	0.815601	0.909111			25.475	0.435	1.94746	0.00623435			17.578	47.569	1.34377	0.681751				23.328	155.037	0.965644	1.20442			13.089	7.872
			21.134	113.773	1.16681	1.3687			30.755	0.54	1.69799	0.00649624			5.928	0.729	0.327286	0.00876992					11.264	60.314	0.861087	0.86441			17.445	0.367	1.3336	0.00525978			22.042	53.181	1.68502	0.762181				15.259	76.602	0.631634	0.595089			26.427	0.675
			16.938	75.245	0.93515	0.905202			36.657	0.519	2.02384	0.0062436			15.182	29.929	0.838201	0.360048					14.411	72.225	1.10166	1.03512			13.398	0.859	1.02422	0.012311			16.254	41.891	1.24255	0.600375				21.929	123.299	0.907734	0.957858			29.902	0.825
			18.616	92.462	1.02779	1.11232			16.567	19.238	0.914667	0.231434			16.151	36.678	0.891699	0.441239					15.093	79.173	1.1538	1.13469			11.494	0.407	0.878669	0.00583306			18.051	42.377	1.37992	0.60734				20.163	120.056	0.834632	0.932664			25.51	0.498
			22.077	115.463	1.21887	1.38903			17.862	2.035	0.986164	0.0244812			16.232	28.031	0.896171	0.337215					14.272	74.047	1.09104	1.06123			112.125	0.635	8.5715	0.00910071			23.531	64.946	1.79885	0.930795				21.885	135.253	0.905912	1.05072			22.289	0.699
			19.807	95.016	1.09355	1.14305			15.446	18.176	0.852776	0.218658			16.258	23.54	0.897607	0.283188					12.693	62.596	0.970328	0.897115			11.557	0.786	0.883485	0.0112648			17.674	43.51	1.3511	0.623578				15.67	79.261	0.648647	0.615745			11.638	3.617
			21.24	115.28	1.17266	1.38683			24.083	13.088	1.32963	0.157449			17.465	40.585	0.964246	0.48824					13.036	65.774	0.996549	0.942662			13.287	2.018	1.01574	0.0289216			15.469	45.244	1.18254	0.64843				19.21	108.072	0.795183	0.839566			31.719	0.943
			19.657	88.917	1.08527	1.06968			20.825	5.09	1.14975	0.061233			14.441	23.671	0.79729	0.284764					16.049	82.632	1.22688	1.18427			15.609	0.746	1.19324	0.0106915			18.604	39.429	1.4222	0.56509				21.436	141.418	0.887326	1.09862			25.894	0.865
			20.746	106.71	1.14539	1.28373			12.655	5.205	0.698685	0.0626165			19.352	24.017	1.06843	0.288926					13.357	81.781	1.02109	1.17207			12.067	5.441	0.922473	0.0779795			22.664	53.151	1.73257	0.761751				18.413	91.87	0.762192	0.713699			14.89	0.546
			22.158	104.529	1.22335	1.25749			9.862	0.598	0.544483	0.00719398			19.63	71.937	1.08378	0.865407					12.421	72.116	0.949535	1.03355			13.457	0.413	1.02873	0.00591905			17.697	34.842	1.35286	0.49935				22.534	130.806	0.932777	1.01618			53.628	1.109
			22.435	113.289	1.23864	1.36287			36.526	4.314	2.01661	0.0518977			17.689	47.727	0.976613	0.574159					10.908	51.85	0.833872	0.743106			70.512	0.783	5.39035	0.0112218			16.582	40.267	1.26763	0.5771				22.04	106.673	0.912329	0.828698			36.195	0.854
			20.697	104.378	1.14268	1.25567			16.222	17.026	0.895619	0.204824			21.579	45.349	1.19138	0.545551					13.527	70.347	1.03408	1.0082			15.505	0.305	1.18529	0.00437121			20.353	65.613	1.5559	0.940355				20.833	133.652	0.862366	1.03829			27.284	0.792
			16.504	67.433	0.911189	0.811223			24.068	15.858	1.3288	0.190773			14.62	55.704	0.807173	0.670123					16.485	79.41	1.26021	1.13809			20.087	0.815	1.53557	0.0116804			20.01	66.423	1.52968	0.951963				17.898	105.993	0.740874	0.823415			26.687	0.924
			20.312	96.626	1.12143	1.16242			16.099	5.299	0.888828	0.0637473			20.61	21.226	1.13788	0.25535					9.786	53.219	0.7481	0.762726			18.431	0.494	1.40897	0.00707993			18.547	44.885	1.41784	0.643284				18.156	111.223	0.751553	0.864045			88.461	1.671
			20.144	97.77	1.11215	1.17618			50.133	1.013	2.76785	0.0121865			16.082	33.197	0.88789	0.399362					12.088	58.386	0.924078	0.836778			8.907	4.414	0.680904	0.0632607			17.468	36.832	1.33536	0.52787				20.523	119.624	0.849534	0.929308			21.908	0.886
			21.127	112.49	1.16643	1.35326			17.24	3.514	0.951823	0.0422737			16.528	34.01	0.912514	0.409143					10.454	60.385	0.799165	0.865428			33.093	0.449	2.52982	0.00643499			19.945	53.911	1.52471	0.772644				17.151	85.643	0.709952	0.665324			35.019	0.858
			19.136	85.792	1.0565	1.03208			25.38	4.937	1.40123	0.0593924			17.941	14.797	0.990526	0.178009					11.919	66.274	0.911159	0.949828			98.554	0.522	7.53405	0.00748122			19.325	39.626	1.47732	0.567913				17.997	101.6	0.744972	0.789288			76.66	0.967
			16.62	74.595	0.917593	0.897383			17.996	4.594	0.993562	0.0552661			22.781	31.215	1.25774	0.375518					12.334	82.694	0.942884	1.18516			107.721	0.916	8.23483	0.013128			11.873	26.102	0.907642	0.37409				10.469	34.717	0.433356	0.269702			46.719	0.891
			14.768	55.806	0.815344	0.67135			19.76	2.412	1.09095	0.0290165			21.109	61.512	1.16543	0.739993					11.96	62.69	0.914293	0.898463			24.425	0.459	1.86719	0.00657831			17.854	49.404	1.36487	0.70805				16.893	96.967	0.699273	0.753296			15.907	0.685
			22.407	130.324	1.23709	1.56781			82.515	0.71	4.55567	0.00854135			21.602	42.605	1.19265	0.512541					7.643	28.79	0.584276	0.412614			21.284	0.783	1.62707	0.0112218			21.649	66.046	1.65498	0.94656				15	79.917	0.620913	0.620841			25.008	0.795
			21.739	114.416	1.20021	1.37643			152.97	2.928	8.4455	0.035224			22.173	60.081	1.22417	0.722778					11.888	53.684	0.908789	0.76939			39.731	0.652	3.03727	0.00934436			16.451	57.011	1.25761	0.817072				21.141	125.978	0.875115	0.97867			18.924	0.668
			17.727	83.405	0.978711	1.00337			65.429	0.776	3.61235	0.00933533			20.487	47.138	1.13109	0.567073					13.761	81.868	1.05197	1.17332			28.868	0.699	2.20684	0.010018			14.605	34.46	1.11649	0.493875				18.867	100.163	0.780985	0.778124			12.728	8.359
			18.846	96.089	1.04049	1.15596			17.767	4.849	0.980919	0.0583338			20.155	37.158	1.11276	0.447013					13.853	78.883	1.05901	1.13054			30.884	1.548	2.36096	0.0221857			21.078	60.454	1.61133	0.866417				15.124	71.545	0.626046	0.555803			27.396	2.345
			21.193	111.245	1.17007	1.33828			47.863	4.688	2.64252	0.0563969			17.859	25.264	0.985998	0.303928					8.848	36.548	0.676393	0.5238			20.35	0.337	1.55567	0.00482983			18.3	34.526	1.39896	0.494821				17.248	92.293	0.713967	0.716985			14.813	3.42
			20.99	116.789	1.15886	1.40498			13.63	14.944	0.752515	0.179777			11.212	0.446	0.619016	0.00536541					13.168	72.718	1.00664	1.04218			13.412	4.856	1.02529	0.0695954			20.137	54.506	1.53939	0.781171				18.462	98.968	0.76422	0.768841			37.913	0.692
			20.268	95.402	1.119	1.14769			142.331	0.678	7.85812	0.00815638			19.2	47.335	1.06004	0.569443					15.798	77.209	1.20769	1.10655			14.251	0.966	1.08943	0.0138446			6.544	1.318	0.500262	0.0188894				16.626	93.992	0.68822	0.730184			16.779	1.842
			19.614	95.167	1.08289	1.14487			145.177	2.7	8.01525	0.0324812			22.888	36.747	1.26365	0.442069					13.848	70.715	1.05862	1.01348			17.577	0.47	1.34369	0.00673596			23.993	59.899	1.83417	0.858463				18.505	103.623	0.766	0.805003			18.898	0.722
			20.667	97.741	1.14103	1.17583			81.329	1.055	4.49019	0.0126917			20.21	44.531	1.1158	0.535711					11.218	63.603	0.85757	0.911548			54.842	0.662	4.19245	0.00948767			19.254	63.54	1.47189	0.910645				18.043	103.157	0.746876	0.801383			28.888	0.912
			16.68	78.584	0.920906	0.945371			22.619	5.108	1.2488	0.0614496			18.259	42.188	1.00808	0.507524					9.993	61.853	0.763924	0.886467			36.501	0.844	2.79035	0.0120961			25.865	93.094	1.97727	1.33421				18.95	110.028	0.78442	0.854761			35.361	0.961
			17.381	78.039	0.959608	0.938814			90.538	2.263	4.99862	0.027224			21.74	50.644	1.20027	0.609251					14.544	76.638	1.11183	1.09836			108.797	0.747	8.31708	0.0107059			20.617	51.629	1.57609	0.739938				21.083	120.184	0.872714	0.933659			31.345	0.85
			16.139	69.332	0.891037	0.834069			11.368	3.35	0.627629	0.0403007			19.211	43.332	1.06064	0.521287					12.467	63.372	0.953051	0.908237			16.06	2.338	1.22772	0.0335078			19.824	53.191	1.51546	0.762325				22.645	128.647	0.937372	0.999404			25.985	0.756
			21.807	110.883	1.20397	1.33393			40.453	4.063	2.23342	0.0488782			21.85	37.786	1.20634	0.454568					11.472	65.385	0.876987	0.937087			45.599	0.586	3.48586	0.00839845			20.458	49.345	1.56393	0.707204				16.078	65.014	0.665536	0.505066			14.434	2.281
			20.624	103.116	1.13865	1.24049			20.426	5.133	1.12772	0.0617503			20.391	42.666	1.12579	0.513275					14.444	73.252	1.10418	1.04984			85.225	0.709	6.5151	0.0101613			20.011	45.328	1.52976	0.649633				15.896	71.278	0.658003	0.553729			29.944	1.032
			16.419	72.423	0.906496	0.871253			66.814	11.929	3.68881	0.143507			23.837	35.816	1.31604	0.430869					9.203	48.991	0.703532	0.702131			14.434	1.077	1.10342	0.0154354			18.576	41.35	1.42006	0.592621				23.419	130.796	0.969411	1.0161			21.587	1.018
			21.77	101.699	1.20193	1.22345			38.634	3.1	2.13299	0.0372932			20.717	52.188	1.14379	0.627825					13.342	70.968	1.01994	1.0171			32.467	1.063	2.48197	0.0152347			21.615	76.02	1.65238	1.08951				16.114	78.179	0.667026	0.60734			14.65	6.708
			20.676	103.352	1.14153	1.24333			75.809	0.984	4.18543	0.0118376			17.605	33.29	0.971975	0.400481					12.859	65.668	0.983018	0.941143			16.634	0.346	1.2716	0.00495881			16.465	32.262	1.25868	0.462374				20.72	116.946	0.857688	0.908504			21.85	4.822
			18.935	100.105	1.0454	1.20427			72.021	8.798	3.97629	0.105841			21.707	42.733	1.19845	0.514081					11.514	70.837	0.880198	1.01522			88.123	0.579	6.73664	0.00829813			23.721	34.669	1.81337	0.49687				19.062	106.737	0.789057	0.829195			33.464	1.021
			15.932	65.018	0.879608	0.782171			38.022	1.171	2.0992	0.0140872			21.529	36.052	1.18862	0.433708					14.488	72.641	1.10755	1.04108			22.491	0.541	1.71934	0.00775352			17.522	42.481	1.33949	0.608831				21.079	119.56	0.872549	0.928811			20.24	0.615
			14.663	67.237	0.809547	0.808866			24.131	12.575	1.33228	0.151278			14.716	27.032	0.812473	0.325197					14.031	76.082	1.07261	1.09039			10.229	2.772	0.781965	0.0397278			16.933	38.073	1.29446	0.545656				16.134	96.064	0.667854	0.746281			40.031	1.124
			18.101	97.352	0.999359	1.17115			13.057	11.291	0.720879	0.135831			21.118	31.299	1.16593	0.376529					14.845	75.845	1.13484	1.087			22.2	0.465	1.6971	0.0066643			22.164	59.976	1.69435	0.859566				16.022	73.762	0.663218	0.573026			18.622	4.071
			22.336	101.736	1.23317	1.22389			16.872	0.437	0.931506	0.00525714			18.456	24.47	1.01896	0.294376					11.39	70.241	0.870719	1.00668			46.907	0.826	3.58585	0.0118381			18.414	43.661	1.40767	0.625742				13.557	56.676	0.561181	0.440292			23.29	0.691
			16.981	64.601	0.937524	0.777154			31.928	14.62	1.76275	0.17588			19.609	51.565	1.08262	0.62033					15.451	76.511	1.18117	1.09654			13.606	3.845	1.04012	0.0551059			23.972	36.282	1.83256	0.519988				14.81	74.002	0.613048	0.57489			33.592	0.925
			21.866	91.916	1.20723	1.10576			10.6	3.907	0.585228	0.0470015			20.234	34.881	1.11712	0.419621					13.481	80.876	1.03057	1.1591			32.562	0.543	2.48923	0.00778219			19.208	35.923	1.46837	0.514842				19.761	103.643	0.817991	0.805159			15.115	2.363
			17.463	78.24	0.964135	0.941232			57.341	0.937	3.16581	0.0112722			18.64	34.974	1.02912	0.42074					11.568	66.811	0.884326	0.957524			11.782	7.013	0.900686	0.100509			17.211	38.16	1.31571	0.546903				20.731	127.961	0.858144	0.994075			18.859	1.962
			17.477	82.448	0.964908	0.991855			26.214	2.272	1.44728	0.0273323			19.176	37.636	1.05871	0.452764					13.362	76.287	1.02147	1.09333			19.816	0.387	1.51485	0.00554642			21.782	53.981	1.66514	0.773647				22.693	129.156	0.939359	1.00336			23.717	1.141
			12.256	46.38	0.676656	0.557954			165.49	2.063	9.13673	0.024818			19.763	39.518	1.09112	0.475404					13.73	72.347	1.0496	1.03687			21.81	0.558	1.66729	0.00799716			15.704	37.294	1.20051	0.534491				17.094	97.627	0.707593	0.758423			32.673	0.821
			22.348	116.563	1.23384	1.40226			21.923	15.508	1.21037	0.186562			18.27	36.299	1.00869	0.436679					13.071	81.767	0.999224	1.17187			12.158	2.748	0.929429	0.0393839			19.205	38.48	1.46814	0.551489				18.327	106.074	0.758632	0.824044			29.323	1.046
			14.794	69.265	0.816779	0.833262			135.399	1.672	7.4754	0.0201143			19.83	45.017	1.09482	0.541557					12.858	74.065	0.982941	1.06149			33.639	0.959	2.57156	0.0137442			21.712	48.656	1.65979	0.69733				18.423	101.101	0.762606	0.785411			23.247	0.956
			22.202	115.397	1.22578	1.38823			18.878	5.929	1.04226	0.0713263			17.329	35.442	0.956737	0.42637					13.362	66.2	1.02147	0.948767			15.901	0.478	1.21557	0.00685062			22.521	64.944	1.72164	0.930767				13.992	49.461	0.579188	0.384242			15.282	0.617
			18.878	84.717	1.04226	1.01915			38.904	7.093	2.1479	0.0853293			18.266	39.099	1.00847	0.470364					12.113	57.48	0.925989	0.823794			10.715	2.086	0.819118	0.0298962			15.096	32.03	1.15403	0.459049				21.793	131.828	0.902104	1.02412			22.131	0.726
			20.661	99.791	1.1407	1.20049			14.837	6.763	0.819153	0.0813593			18.718	43.676	1.03342	0.525425					10.546	60.711	0.806198	0.8701			15.336	0.547	1.17237	0.00783951			15.241	30.645	1.16511	0.439199				16.822	82.251	0.696334	0.638973			20.339	2.76
			16.322	62.795	0.90114	0.755428			12.21	3.483	0.674116	0.0419007			23.873	34.84	1.31803	0.419127					12.509	64.787	0.956262	0.928517			23.9	0.512	1.82706	0.0073379			19.9	37.336	1.52127	0.535093				14.118	64.125	0.584404	0.49816			58.108	1.061
			16.782	78.344	0.926537	0.942483			11.133	4.058	0.614655	0.048818			18.43	37.741	1.01752	0.454027					15.185	79.074	1.16083	1.13328			13.017	3.167	0.995096	0.0453889			21.589	50.014	1.65039	0.716792				18.961	112.695	0.784876	0.87548			21.366	6.678
			19.266	98.805	1.06368	1.18863			61.552	3.308	3.3983	0.0397955			18.412	45.838	1.01653	0.551434					12.473	69.698	0.95351	0.9989			11.475	5.443	0.877217	0.0780082			15.77	29.64	1.20555	0.424796				22.145	121.758	0.916675	0.945887			33.2	1.087
			21.269	100.859	1.17426	1.21334			20.565	3.577	1.1354	0.0430315			17.666	28.564	0.975343	0.343627					10.045	61.169	0.767899	0.876664			122.311	0.627	9.35017	0.00898606			20.041	36.929	1.53205	0.52926				19.606	110.063	0.811575	0.855033			38.109	1.09
			13.274	51.114	0.73286	0.614905			29.169	3.146	1.61043	0.0378466			18.127	37.365	1.00079	0.449503					14.756	77.134	1.12804	1.10547			23.19	0.443	1.77278	0.006349			19.658	49.27	1.50277	0.706129				14.02	63.853	0.580347	0.496047			15.249	2.283
			21.568	96.893	1.19077	1.16563			17.148	33.151	0.946744	0.398809			17.533	38.03	0.968	0.457503					15.932	85.496	1.21794	1.22531			19.669	0.506	1.50361	0.00725191			21.254	50.603	1.62478	0.725234				21.059	116.719	0.871721	0.906741			29.224	1.078
			21.424	100.056	1.18282	1.20368			82.668	2.235	4.56411	0.0268872			18.809	47.402	1.03845	0.570249					12.718	69.639	0.972239	0.998055			18.856	0.883	1.44146	0.012655			21.709	41.355	1.65956	0.592693				11.188	46.206	0.463119	0.358955			26.859	0.959
			19.397	107.658	1.07091	1.29513			9.608	2.511	0.530459	0.0302075			18.845	40.454	1.04044	0.486664					13.179	67.818	1.00748	0.971956			65.251	0.527	4.98817	0.00755288			18.429	37.855	1.40882	0.542532				20.474	116.755	0.847505	0.90702			22.975	0.975
			20.446	104.541	1.12883	1.25764			162.438	1.798	8.96823	0.0216301			18.38	41.796	1.01476	0.502809					11.104	62.861	0.848855	0.900913			22.152	0.699	1.69343	0.010018			13.937	32.46	1.06543	0.465211				17.968	89.872	0.743771	0.698178			12.698	9.438
			18.059	89.423	0.99704	1.07576			16.577	12.238	0.915219	0.147224			18.745	43.162	1.03491	0.519242					10.135	58.118	0.774779	0.832938			60.364	1.238	4.61458	0.0177428			19.758	42.914	1.51042	0.615036				22.002	127.372	0.910756	0.989499			45.311	0.938
			14.904	61.18	0.822852	0.735999			28.114	12.748	1.55218	0.153359			17.94	41.873	0.99047	0.503735					15.963	83.603	1.22031	1.19818			58.233	0.709	4.45167	0.0101613			19.102	31.38	1.46027	0.449733				19.7	104.591	0.815466	0.812523			50.491	1.346
			21.472	108.806	1.18547	1.30894			71.793	1.316	3.9637	0.0158316			12.747	1.042	0.703764	0.0125353					11.411	70.227	0.872324	1.00648			18.602	0.446	1.42205	0.006392			18.091	33.868	1.38298	0.485391				8.692	26.616	0.359799	0.206768			22.991	0.725
			12.744	38.857	0.703598	0.467452			29.276	8.183	1.61633	0.098442			19.4	39.15	1.07108	0.470977					12.517	62.174	0.956873	0.891067			18.163	4.142	1.38849	0.0593625			17.016	21.44	1.3008	0.307275				21.664	105.471	0.896764	0.81936			28.962	0.799
			22.213	120.744	1.22638	1.45256			15.193	19.019	0.838808	0.2288			16.19	37.193	0.893853	0.447434					12.29	62.9	0.93952	0.901472			10.2	2.406	0.779748	0.0344824			21.342	55.983	1.63151	0.802339				17.716	91.268	0.73334	0.709023			20.7	0.779
			21.619	108.662	1.19359	1.30721			22.064	1.186	1.21816	0.0142677			18.635	46.25	1.02884	0.556391					13.414	72.057	1.02545	1.03271			22.581	0.831	1.72622	0.0119098			15.81	28.427	1.20861	0.407411				16.758	80.473	0.693684	0.625161			26.782	1.184
			17.613	85.189	0.972417	1.02483			207.879	2.656	11.477	0.0319519			13.385	28.561	0.738988	0.343591					14.551	81.71	1.11236	1.17105			43.843	0.532	3.35162	0.00762454			19.185	35.383	1.46661	0.507103				10.158	28.758	0.420482	0.223409			39.405	1.632
			18.604	87.05	1.02713	1.04722			13.509	3.286	0.745834	0.0395308			18.271	39.552	1.00874	0.475813					11.954	74.977	0.913834	1.07456			11.88	0.733	0.908177	0.0105052			17.297	31.269	1.32228	0.448142				17.938	85.094	0.742529	0.661059			32.375	0.95
			15.439	62.915	0.85239	0.756872			23.171	4.609	1.27927	0.0554466			12.473	27.635	0.688636	0.332451					12.483	56.15	0.954274	0.804732			10.865	1.446	0.830585	0.0207238			16.667	20.983	1.27412	0.300725				21.471	116.961	0.888775	0.908621			48.743	1.087
			15.324	65.526	0.846041	0.788282			10.805	15.443	0.596546	0.18578			19.235	41.412	1.06197	0.498189					13.836	77.447	1.05771	1.10996			29.471	0.566	2.25294	0.00811182			15.514	32.288	1.18598	0.462746				21.415	121.813	0.886457	0.946314			21.029	1.184
			18.826	106.163	1.03939	1.27715			17.003	19.278	0.938738	0.231916			19.424	39.121	1.0724	0.470628					13.777	70.657	1.0532	1.01264			47.224	0.584	3.61008	0.00836979			19.022	47.298	1.45415	0.677867				15.054	67.39	0.623149	0.523524			32.762	0.911
			16.38	61.021	0.904342	0.734087			17.957	0.975	0.991409	0.0117293			22.135	58.813	1.22208	0.707524					13.645	71.629	1.0431	1.02657			101.573	0.688	7.76484	0.0098603			19.972	38.671	1.52678	0.554226				21.141	129.97	0.875115	1.00968			23.536	0.812
			22.869	110.281	1.2626	1.32669			17.267	11.308	0.953314	0.136036			18.682	47.164	1.03144	0.567386					11.406	53.428	0.871942	0.765721			14.802	1.512	1.13155	0.0216697			12.523	24.259	0.957332	0.347676				19.227	93.262	0.795887	0.724513			12.378	10.516
			21.32	103.271	1.17708	1.24236			20.033	0.455	1.10603	0.00547368			17.852	50.036	0.985612	0.601936					11.716	60.014	0.89564	0.860111			8.24	4.216	0.629914	0.060423			14.862	18.159	1.13614	0.260252				20.261	107.801	0.838688	0.83746			47.576	0.771
			19.69	96.506	1.08709	1.16097			14.578	14.191	0.804854	0.170719			18.331	41.02	1.01206	0.493473					10.8	61.194	0.825616	0.877022			11.739	0.984	0.897398	0.0141025			13.604	19.378	1.03997	0.277722				14.587	74.73	0.603817	0.580546			15.176	5.297
			17.207	81.078	0.950001	0.975374			14.154	16.345	0.781445	0.196631			17.065	33.07	0.942161	0.397834					11.477	54.213	0.87737	0.776972			9.988	1.415	0.763542	0.0202795			13.464	27.613	1.02927	0.395745				22.856	113.401	0.946106	0.880965			44.627	1.167
			19.094	90.552	1.05418	1.08935			30.784	15.516	1.69959	0.186658			19.116	56.321	1.0554	0.677545					9.943	60.938	0.760102	0.873353			12.657	1.291	0.967576	0.0185024			14.197	24.514	1.0853	0.351331				14.954	68.161	0.619009	0.529514			30.767	1.192
			15.847	72.481	0.874915	0.871951			13.18	7.71	0.72767	0.0927518			19.371	21.238	1.06948	0.255495					11.819	70.194	0.903514	1.00601			96.8	0.584	7.39996	0.00836979			18.3	38.747	1.39896	0.555316				23.448	110.91	0.970612	0.861613			66.993	0.868
			18.368	93.187	1.0141	1.12105			44.877	1.097	2.47767	0.013197			16.715	19.575	0.922838	0.235489					13.628	79.615	1.0418	1.14103			32.714	0.633	2.50085	0.00907205			25.492	70.796	1.94876	1.01464				17.995	71.184	0.744889	0.552998			19.527	0.844
			2.543	2.915	0.140399	0.0350676			53.277	0.972	2.94143	0.0116932			23.446	50.486	1.29446	0.60735					13.739	69.634	1.05029	0.997983			60.679	0.629	4.63866	0.00901472			21.084	62.519	1.61179	0.896012				22.001	129.087	0.910714	1.00282			15	0.725
			19.813	89.692	1.09388	1.079			11.958	0.6	0.660203	0.00721804			18.167	46.147	1.003	0.555151					11.378	70.952	0.869801	1.01687			68.788	0.949	5.25856	0.0136009			26.557	81.652	2.03017	1.17022				19.867	96.487	0.822379	0.749567			24.012	1.103
			17.36	83.332	0.958448	1.00249			15.202	3.163	0.839305	0.0380511			21.781	79.175	1.20253	0.95248					14.495	81.626	1.10808	1.16985			62.399	0.607	4.77015	0.00869942			18.909	43.838	1.44552	0.628279				19.369	89.732	0.801765	0.69709			10.853	10.009
			20.249	105.28	1.11795	1.26653			12.139	20.597	0.670196	0.247783			17.685	39.294	0.976392	0.472709					11.768	68.532	0.899615	0.982189			76.508	0.842	5.84872	0.0120674			18.924	40.662	1.44666	0.582761				16.902	92.143	0.699645	0.71582			21.808	0.734
			22.575	109.705	1.24637	1.31976			39.761	1.339	2.19521	0.0161083			18.18	39.96	1.00372	0.480721					12.739	73.175	0.973844	1.04873			64.227	0.747	4.90989	0.0107059			23.61	69.884	1.80489	1.00157				19.239	98.857	0.796383	0.767978			28.683	0.84
			18.495	100.934	1.02111	1.21424			14.359	8.67	0.792763	0.104301			20.478	67.983	1.13059	0.81784					12.753	68.527	0.974915	0.982118			19.355	0.516	1.47961	0.00739523			19.187	42.185	1.46677	0.604588				20.498	119.718	0.848499	0.930039			45.19	1.962
			21.55	117.649	1.18978	1.41533			18.373	19.149	1.01438	0.230364			22.654	74.13	1.25073	0.891789					14.733	70.834	1.12628	1.01518			16.762	0.893	1.28139	0.0127983			21.335	46.219	1.63097	0.662403				18.96	100.824	0.784834	0.783259			20.908	5.351
			21.678	120.094	1.19685	1.44474			15.578	4.312	0.860064	0.0518736			21.516	55.858	1.1879	0.671975					12.125	63.153	0.926907	0.905098			19.385	0.528	1.4819	0.00756721			22.919	67.28	1.75206	0.964246				17.42	81.14	0.721087	0.630342			28.623	3.61
			18.73	90.897	1.03409	1.0935			13.281	7.919	0.733246	0.0952661			20.476	46.993	1.13048	0.565329					9.981	51.396	0.763007	0.736599			15.286	1.208	1.16855	0.0173129			30.958	91.003	2.36661	1.30424				24.644	138.849	1.02012	1.07866			16.984	1.565
			14.021	55.819	0.774102	0.671506			11.27	21.027	0.622219	0.252956			19.486	42.727	1.07583	0.514009					12.884	66.354	0.984929	0.950975			33.379	0.629	2.55169	0.00901472			17.92	39.657	1.36991	0.568358				13.434	31.448	0.55609	0.244306			28.587	0.862
			16.014	69.595	0.884136	0.837232			13.508	9.851	0.745779	0.118508			13.469	20.552	0.743626	0.247242					14.614	78.121	1.11718	1.11962			26.096	1.369	1.99493	0.0196203			30.552	93.508	2.33558	1.34014				24.896	136.086	1.03055	1.05719			62.946	0.795
			19.232	99.276	1.0618	1.1943			12.465	17.376	0.688195	0.209034			13.144	5.163	0.725682	0.0621112					14.381	71.314	1.09937	1.02206			15.187	0.566	1.16098	0.00811182			21.598	58.291	1.65108	0.835417				18.469	85.566	0.76451	0.664726			28.114	0.863
			17.49	78.955	0.965626	0.949834			27.853	17.173	1.53777	0.206592			19.827	33.56	1.09465	0.403729					12.813	67.245	0.979501	0.963744			60.667	0.547	4.63774	0.00783951			30.009	89.288	2.29407	1.27966				20.15	112.525	0.834094	0.874159			47.08	1.491
			16.09	78.036	0.888332	0.938778			10.559	8.779	0.582964	0.105612			20.312	28.071	1.12143	0.337696					13.162	77.197	1.00618	1.10637			15.067	0.489	1.15181	0.00700827			21.899	46.697	1.67409	0.669254				21.017	124.038	0.869982	0.963599			74.639	0.758
			18.663	93.533	1.03039	1.12521			14.49	9.452	0.799995	0.113708			20.125	40.191	1.1111	0.4835					12.956	64.932	0.990433	0.930595			12.874	0.624	0.984165	0.00894306			26.845	75.578	2.05219	1.08317				16.499	73.563	0.682963	0.57148			108.167	1.941
			18.158	97.636	1.00251	1.17457			11.096	11.352	0.612612	0.136565			18.902	41.348	1.04358	0.497419					13.845	73.14	1.05839	1.04823			32.834	0.915	2.51002	0.0131136			31.972	83.155	2.44413	1.19176				21.445	106.458	0.887699	0.827027			36.51	1.149
			21.786	107.657	1.20281	1.29512			119.238	5.612	6.58315	0.0675127			19.544	22.519	1.07903	0.270905					13.075	70.62	0.99953	1.01211			16.704	0.381	1.27695	0.00546043			21.679	51.497	1.65727	0.738046				21.886	113.066	0.905954	0.878362			23.808	0.805
			14.907	59.939	0.823018	0.72107			13.927	10.576	0.768912	0.12723			19.972	33.392	1.10266	0.401708					9.884	57.87	0.755591	0.829383			30.666	0.859	2.34429	0.012311			21.128	33.409	1.61515	0.478812				21.707	111.901	0.898544	0.869312			67.894	0.998
			19.954	103.736	1.10166	1.24795			15.391	11.069	0.84974	0.133161			19.094	25.766	1.05418	0.309967					15.617	78.187	1.19386	1.12056			46.208	0.582	3.53241	0.00834113			28.546	77.03	2.18222	1.10398				20.404	109.417	0.844608	0.850014			46.813	1.101
			20.586	108.164	1.13656	1.30122			12.664	20.62	0.699182	0.24806			19.137	29.095	1.05656	0.350015					13.764	79.798	1.0522	1.14365			44.57	0.51	3.40719	0.00730924			31.254	74.989	2.38924	1.07473				14.123	62.249	0.584611	0.483586			22.042	0.819
			16.105	77.035	0.88916	0.926736			13.287	8.464	0.733577	0.101822			7.668	0.448	0.423352	0.00538947					13.458	76.181	1.02881	1.09181			18.485	0.569	1.4131	0.00815481			23.982	69.614	1.83333	0.997696				23.228	128.599	0.961505	0.999031			136.398	0.783
			17.696	78.574	0.976999	0.94525			13.098	6.074	0.723143	0.0730706			20.904	35.933	1.15411	0.432276					11.402	59.985	0.871636	0.859695			29.745	0.523	2.27388	0.00749555			26.284	52.499	2.0093	0.752407				18.958	113.187	0.784752	0.879302			16.941	2.25
			19.008	93.212	1.04943	1.12135			17.941	0.982	0.990526	0.0118135			18.813	29.935	1.03867	0.36012					14.927	80.035	1.14111	1.14705			89.791	0.586	6.86415	0.00839845			21.727	47.55	1.66094	0.681479				21.636	125.223	0.895605	0.972805			31.185	0.802
			14.611	65.015	0.806676	0.782135			12.017	12.213	0.663461	0.146923			20.415	48.87	1.12712	0.587909					14.096	87.739	1.07758	1.25746			27.32	0.579	2.0885	0.00829813			22.061	54.965	1.68647	0.787749				16.561	76.632	0.68553	0.595322			20.432	0.717
			16.734	80.096	0.923887	0.96356			56.903	0.8	3.14162	0.00962405			17.407	23.238	0.961043	0.279555					10.17	53.94	0.777455	0.773059			35.16	0.726	2.68784	0.0104049			24.83	53.468	1.89815	0.766295				22.86	142.062	0.946272	1.10362			31.682	0.877
			20.219	96.468	1.11629	1.16052			17.459	23.123	0.963914	0.278171			19.053	26.555	1.05192	0.319458					14.009	71.209	1.07093	1.02056			43.734	0.58	3.34329	0.00831246			21.964	62.387	1.67906	0.89412				14.284	62.036	0.591275	0.481931			21.499	0.585
			19.807	93.185	1.09355	1.12102			13.243	10.811	0.731148	0.130057			15.554	16.971	0.858739	0.204162					12.241	64.43	0.935774	0.9234			63.017	0.599	4.81739	0.00858477			21.913	65.462	1.67516	0.938191				19.448	107.698	0.805035	0.83666			19.41	4.749
			13.027	47.568	0.719223	0.572246			12.208	16.279	0.674006	0.195837			17.753	34.684	0.980146	0.417251					14.654	82.734	1.12024	1.18573			30.33	0.543	2.3186	0.00778219			29.25	78.764	2.23604	1.12883				19.216	91.562	0.795431	0.711307			50.558	1.286
			21.058	101.955	1.16262	1.22653			11.155	2.678	0.615869	0.0322165			14.955	25.398	0.825668	0.30554					12.882	64.7	0.984776	0.92727			39.824	0.61	3.04438	0.00874242			23.402	55.801	1.78899	0.799731				14.816	65.622	0.613297	0.50979			44.44	1.735
			17.467	89.935	0.964356	1.08192			47.868	0.834	2.6428	0.0100331			17.213	16.561	0.950333	0.19923					14.136	79.442	1.08064	1.13855			29.038	0.731	2.21984	0.0104766			25.166	43.773	1.92384	0.627347				23.049	131.975	0.954095	1.02526			39.22	1.068
			16.37	86.247	0.90379	1.03756			12.409	7.447	0.685103	0.0895879			19.569	46.715	1.08041	0.561985					12.311	61.872	0.941126	0.886739			48.435	0.578	3.70266	0.0082838			22.083	35.925	1.68815	0.514871				13.005	43.698	0.538332	0.339471			36.484	1.305
			17.479	88.648	0.965018	1.06644			12.429	7.564	0.686207	0.0909954			16.963	31.833	0.93653	0.382953					9.122	40.615	0.69734	0.582087			54.42	0.683	4.16019	0.00978864			24.845	42.94	1.8993	0.615409				22.308	125.202	0.923422	0.972641			41.248	0.752
			18.58	89.769	1.0258	1.07993			14.258	13.403	0.787187	0.161239			16.629	20.826	0.91809	0.250538					10.906	55.453	0.833719	0.794743			21.644	0.48	1.6546	0.00687928			20.428	40.529	1.56164	0.580855				13.322	56.558	0.551454	0.439375			20.776	0.849
			15.549	69.635	0.858463	0.837714			11.712	6.354	0.646621	0.076439			17.262	50.118	0.953038	0.602923					13.281	74.707	1.01528	1.07069			76.365	0.642	5.83779	0.00920104			25.727	60.729	1.96672	0.870358				14.062	54.891	0.582086	0.426425			125.51	1.919
			15.886	82.279	0.877069	0.989822			13.155	0.616	0.72629	0.00741052			16.813	51.358	0.928248	0.61784					13.115	81.063	1.00259	1.16178			78.293	0.732	5.98518	0.0104909			26.241	59.49	2.00602	0.852601				11.404	35.208	0.47206	0.273516			28.651	0.853
			19.517	105.174	1.07754	1.26525			12.472	13.791	0.688581	0.165907			17.404	50.225	0.960878	0.60421					14.931	66.921	1.14141	0.959101			22.773	0.51	1.7409	0.00730924			28.626	74.073	2.18834	1.0616				17.825	89.281	0.737852	0.693586			90.583	1.463
			18.446	88.494	1.01841	1.06459			42.793	1.042	2.36261	0.0125353			18.682	38.275	1.03144	0.460451					12.592	58.939	0.962607	0.844704			63.005	0.525	4.81647	0.00752421			21.093	40.63	1.61247	0.582302				22.14	123.26	0.916468	0.957555			26.044	1.214
			16.119	84.945	0.889933	1.02189			13.19	18.835	0.728222	0.226586			19.922	46.387	1.0999	0.558039					13.289	70.824	1.01589	1.01504			31.397	0.499	2.40017	0.00715159			20.951	46.553	1.60162	0.66719				20.687	103.391	0.856322	0.803201			30.056	3.39
			17.884	98.441	0.987379	1.18425			20.524	0.851	1.13313	0.0102376			19.051	35.759	1.05181	0.430183					12.808	69.597	0.979119	0.997453			70.839	0.483	5.41535	0.00692228			26.474	54.454	2.02383	0.780426				15.73	65.404	0.651131	0.508096			58.967	0.709
			19.136	106.201	1.0565	1.2776			12.198	13.131	0.673454	0.157967			10.661	0.776	0.588596	0.00933533					12.853	67.058	0.982559	0.961064			25.481	0.643	1.94792	0.00921537			19.115	36.494	1.46126	0.523026				15.761	75.119	0.652414	0.583568			27.693	2.615
			20.767	107.802	1.14655	1.29687			118.184	5.154	6.52496	0.062003			18.316	50.372	1.01123	0.605978					15.625	87.904	1.19447	1.25983			66.43	0.57	5.0783	0.00816915			25.754	52.472	1.96879	0.75202				22.846	121.539	0.945692	0.944185			32.026	0.788
			21.566	117.08	1.19066	1.40848			13.535	13.267	0.74727	0.159603			15.71	50.438	0.867352	0.606772					12.278	70.294	0.938603	1.00744			52.579	0.631	4.01945	0.00904339			24.661	61.887	1.88523	0.886954				20.88	120.542	0.864311	0.93644			31.125	1.063
			15.468	67.715	0.853991	0.814616			11.424	9.188	0.630721	0.110532			19.286	30.932	1.06478	0.372114					13.329	72.208	1.01895	1.03487			55.042	0.671	4.20774	0.00961666			19.411	31.474	1.48389	0.45108				21.119	100.731	0.874205	0.782537			24.591	0.72
			21.593	109.439	1.19215	1.31656			41.279	0.685	2.27902	0.00824059			18.768	38.348	1.03618	0.461329					13.463	69.901	1.02919	1.00181			15.776	0.828	1.20601	0.0118668			25.989	43.258	1.98675	0.619966				19.78	106.962	0.818778	0.830943			9.255	0.846
			20.389	103.079	1.12568	1.24005			105.403	5.376	5.81932	0.0646736			16.656	42.053	0.91958	0.5059					13.048	73.986	0.997466	1.06036			69.963	0.901	5.34838	0.012913			24.067	50.725	1.83982	0.726982				20.979	111.807	0.868409	0.868581			40.401	2.726
			15.806	76.779	0.872652	0.923656			13.032	8.338	0.719499	0.100307			17.879	35.939	0.987103	0.432349					12.206	68.05	0.933099	0.975281			91.729	0.503	7.01231	0.00720891			24.06	51.413	1.83929	0.736843				18.583	95.699	0.769229	0.743445			23.38	1.04
			21.663	106.032	1.19602	1.27557			12.118	8.165	0.669037	0.0982255			18.601	37.884	1.02696	0.455747					12.318	53.389	0.941661	0.765162			102.499	0.519	7.83563	0.00743822			25.968	43.375	1.98515	0.621643				17.468	92.084	0.723074	0.715362			38.934	1.087
			21.702	104.014	1.19817	1.2513			26.568	6.03	1.46682	0.0725413			18.372	39.915	1.01432	0.48018					13.94	79.661	1.06566	1.14169			36.129	0.613	2.76191	0.00878541			23	45.152	1.75826	0.647111				15.134	72.554	0.62646	0.563641			16.331	0.904
			21.584	113.001	1.19166	1.35941			13.282	14.54	0.733301	0.174917			13.218	6.814	0.729768	0.0819729					13.803	73.436	1.05518	1.05247			75.377	0.822	5.76226	0.0117808			22.408	54.848	1.713	0.786072				19.816	95.498	0.820268	0.741884			46.414	1.542
			22.875	113.297	1.26293	1.36297			154.518	2.267	8.53096	0.0272722			17.471	35.508	0.964577	0.427164					12.697	57.541	0.970634	0.824668			23.616	0.635	1.80535	0.00910071			22.463	38.522	1.7172	0.552091				22.592	117.59	0.935178	0.913507			14.527	0.973
			18.802	99.675	1.03806	1.1991			13.068	15.042	0.721486	0.180956			22.62	51.687	1.24885	0.621798					13.035	71.566	0.996472	1.02567			35.727	0.71	2.73118	0.0101756			24.609	57.906	1.88126	0.829899				12.048	39.113	0.498718	0.303852			16.638	2.803
			18.749	100.568	1.03514	1.20984			10.949	5.906	0.604496	0.0710496			19.143	34.673	1.05689	0.417118					13.427	76.71	1.02644	1.09939			18.883	0.557	1.44353	0.00798283			21.703	32.888	1.65911	0.471345				18.723	96.509	0.775024	0.749738			13.794	5.247
			23.631	116.762	1.30467	1.40465			12.655	20.166	0.698685	0.242598			18.392	33.723	1.01543	0.40569					14.052	71.253	1.07422	1.02119			28.42	0.596	2.17259	0.00854177			20.236	26.567	1.54696	0.380754				20.188	113.35	0.835666	0.880568			32.917	3.524
			22.239	120.317	1.22782	1.44742			41.696	0.615	2.30204	0.00739849			17.341	30.741	0.957399	0.369816					13.222	75.227	1.01077	1.07814			149.589	0.592	11.4355	0.00848445			20.998	38.548	1.60521	0.552464				18.394	90.153	0.761405	0.700361			12.567	1.334
			19.85	101.496	1.09592	1.221			18.796	0.79	1.03773	0.00950375			15.79	15.152	0.871768	0.18228					13.026	66.893	0.995784	0.958699			72.115	0.707	5.5129	0.0101326			22.795	42.166	1.74258	0.604316				19.623	105.795	0.812279	0.821877			29.078	2.003
			21.455	107.011	1.18453	1.28735			11.882	13.481	0.656007	0.162177			17.749	43.952	0.979925	0.528745					11.059	51.227	0.845415	0.734177			131.248	0.663	10.0334	0.00950201			21.249	51.3	1.6244	0.735223				19.546	91.677	0.809091	0.7122			58.405	1.295
			16.557	83.331	0.914115	1.00248			12.494	13.78	0.689796	0.165774			14.724	17.115	0.812914	0.205895					12.1	63.602	0.924995	0.911533			59.745	0.488	4.56726	0.00699394			23.017	44.239	1.75956	0.634026				20.407	122.795	0.844732	0.953943			25.509	0.784
			17.313	85.794	0.955854	1.03211			10.323	0.898	0.569935	0.010803			17.455	18.803	0.963693	0.226201					14.443	75.35	1.10411	1.0799			71.485	0.685	5.46474	0.00981731			22.301	42.877	1.70482	0.614506				20.557	111.747	0.850941	0.868115			35.2	0.917
			17.791	101.873	0.982244	1.22554			41.653	1.133	2.29967	0.0136301			19.643	44.545	1.08449	0.535879					13.01	73.655	0.994561	1.05561			41.622	0.398	3.18183	0.00570407			17.746	20.105	1.35661	0.288142				20.74	105.937	0.858516	0.82298			13.584	0.573
			17.135	83.011	0.946026	0.998628			7.864	0.581	0.434173	0.00698947			12.284	19.537	0.678202	0.235031					13.61	68.383	1.04043	0.980054			18.836	0.524	1.43994	0.00750988			6.968	10.684	0.532675	0.153121				21.03	121.586	0.87052	0.94455			16.266	0.837
			17.284	99.519	0.954252	1.19722			52.274	0.631	2.88606	0.00759097			22.406	39.673	1.23704	0.477269					8.653	38.271	0.661486	0.548494			40.613	0.515	3.1047	0.00738089			23.432	62.915	1.79128	0.901687				19.067	98.895	0.789264	0.768274			68.103	1.138
			16.803	79.818	0.927696	0.960216			11.958	6.889	0.660203	0.0828751			20.135	58.004	1.11166	0.697792					13.426	70.884	1.02636	1.0159			34.35	0.444	2.62592	0.00636333			20.276	42.88	1.55002	0.614549				24.411	129.974	1.01047	1.00971			59.879	0.866
			19.687	108.67	1.08692	1.30731			10.479	4.803	0.578547	0.0577804			17.407	47.041	0.961043	0.565906					13.296	67.35	1.01642	0.965249			44.324	0.6	3.38839	0.0085991			21.313	52.138	1.62929	0.747233				24.016	130.71	0.994124	1.01543			11.089	0.895
			18.706	94.071	1.03276	1.13168			21.473	5.924	1.18553	0.0712661			20.881	40.327	1.15284	0.485136					12.695	73.272	0.970481	1.05012			22.02	0.615	1.68334	0.00881408			19.926	47.255	1.52326	0.677251				19.615	89.083	0.811948	0.692048			43.302	0.907
			18.901	99.22	1.04353	1.19362			23.679	1.334	1.30732	0.0160481			15.167	34.69	0.837373	0.417323					13.396	68.477	1.02407	0.981401			34.615	0.528	2.64617	0.00756721			20.646	43.489	1.5783	0.623277				16.859	65.541	0.697865	0.50916			43.614	0.89
			21.397	112.985	1.18133	1.35922			18.407	0.968	1.01625	0.0116451			18.585	52.545	1.02608	0.63212					11.261	51.188	0.860857	0.733618			161.544	0.613	12.3494	0.00878541			25.21	70.686	1.9272	1.01306				15.347	73.963	0.635277	0.574587			32.044	1.044
			20.264	110.081	1.11878	1.32428			25.483	1.172	1.40692	0.0140992			20.345	73.323	1.12325	0.882081					12.177	68.41	0.930882	0.980441			33.776	0.908	2.58204	0.0130133			22.267	54.091	1.70222	0.775223				16.331	78.747	0.676009	0.611752			19.547	2.953
			16.022	88.019	0.884577	1.05887			30.826	0.573	1.70191	0.00689323			18.276	47.554	1.00902	0.572078					10.683	53.94	0.816672	0.773059			25.636	0.534	1.95977	0.0076532			21.507	50.651	1.64412	0.725922				16.461	86.553	0.68139	0.672394			26.758	0.858
			19.632	106.173	1.08389	1.27727			18.314	0.639	1.01112	0.00768721			20.029	78.517	1.1058	0.944565					11.809	60.639	0.90275	0.869068			31.426	0.983	2.40239	0.0140882			25.741	60.318	1.96779	0.864468				22.715	113.603	0.94027	0.882534			35.808	1.746
			3.957	0.758	0.218467	0.00911879			30.805	0.63	1.70075	0.00757894			20.295	53.7	1.12049	0.646015					12.13	58.76	0.927289	0.842139			22.995	0.554	1.75787	0.00793984			20.515	49.627	1.56829	0.711246				22.817	127.589	0.944492	0.991185			27.494	0.92
			18.93	73.417	1.04513	0.883211			21.486	1.145	1.18625	0.0137744			6.71	0.817	0.37046	0.00982856					10.863	55.528	0.830432	0.795818			53.213	0.624	4.06792	0.00894306			20.775	41.988	1.58816	0.601765				20.988	119.517	0.868782	0.928477			41.428	0.802
			18.837	85.152	1.03999	1.02438			19.214	2.582	1.06081	0.0310616			19.498	50.246	1.07649	0.604463					12.662	65.319	0.967958	0.936141			28.892	0.905	2.20868	0.0129703			21.151	42.079	1.61691	0.603069				20.057	113.523	0.830244	0.881912			15.167	0.932
			16.703	70.076	0.922175	0.843019			14.643	3.597	0.808442	0.0432721			20.5	54.14	1.13181	0.651308					11.796	69.883	0.901756	1.00155			116.62	0.556	8.91512	0.0079685			20.878	51.539	1.59604	0.738648				17.903	96.684	0.741081	0.751097			71.671	3.707
			19.539	102.028	1.07875	1.2274			27.54	0.638	1.52049	0.00767518			17.76	44.086	0.980533	0.530357					12.156	60.752	0.929276	0.870688			45.325	0.748	3.46491	0.0107202			22.846	46.194	1.74648	0.662045				21.689	121.656	0.897799	0.945094			12.404	0.642
			15.717	73.613	0.867738	0.885569			18.592	0.867	1.02647	0.0104301			18.537	34.257	1.02343	0.412114					13.413	72.151	1.02537	1.03406			23.86	0.667	1.824	0.00955933			24.925	58.818	1.90541	0.84297				19.019	88.528	0.787277	0.687737			18.874	0.717
			16.488	75.084	0.910305	0.903265			37.193	1.502	2.05343	0.0180692			21.004	59.526	1.15963	0.716102					12.559	67.493	0.960084	0.967298			39.407	0.728	3.0125	0.0104336			22.445	59.127	1.71583	0.847398				18.374	88.815	0.760577	0.689966			21.679	1.04
			16.333	72.975	0.901748	0.877894			26.63	0.469	1.47025	0.0056421			16.831	39.158	0.929242	0.471073					13.067	69.403	0.998919	0.994672			27.032	0.527	2.06649	0.00755288			15.633	26.029	1.19508	0.373043				11.555	37.077	0.47831	0.288036			17.336	4.083
			17.122	86.133	0.945308	1.03619			128.028	1.717	7.06845	0.0206556			19.327	60.694	1.06705	0.730153					12.547	63.717	0.959167	0.913181			21.282	0.962	1.62692	0.0137872			20.925	38.469	1.59963	0.551331				23.201	128.307	0.960387	0.996763			14.081	14.412
			17.087	74.713	0.943376	0.898802			21.492	0.645	1.18658	0.00775939			18.264	40.774	1.00836	0.490514					12.298	65.404	0.940132	0.937359			38.638	0.745	2.95372	0.0106772			19.526	37.708	1.49268	0.540425				19	70.856	0.78649	0.55045			18.113	0.627
			16.283	67.055	0.898987	0.806676			12.206	13.639	0.673895	0.164078			19.71	56.32	1.08819	0.677533					11.666	63.981	0.891818	0.916965			116.781	0.484	8.92743	0.00693661			18.23	33.419	1.39361	0.478956				20.829	114.987	0.8622	0.893285			129.948	6.4
			17.087	91.622	0.943376	1.10222			18.94	1.964	1.04568	0.023627			20.721	74.984	1.14401	0.902062					13.196	67.903	1.00878	0.973175			29.07	0.882	2.22228	0.0126407			19.297	34.293	1.47518	0.491482				17.925	89.242	0.741991	0.693283			30.206	1.045
			16.02	66.676	0.884467	0.802117			20.928	0.593	1.15544	0.00713383			17.097	36.896	0.943928	0.443861					12.912	70.593	0.987069	1.01173			19.403	0.636	1.48328	0.00911505			22.881	56.843	1.74916	0.814664				21.828	120.361	0.903553	0.935034			20.038	0.831
			15.319	68.167	0.845765	0.820053			11.881	7.89	0.655952	0.0949172			13.085	19.447	0.722425	0.233949					13.776	77.841	1.05312	1.1156			159.591	0.746	12.2001	0.0106915			21.832	50.63	1.66897	0.725621				22.072	139.251	0.913653	1.08178			21.165	0.874
			16.858	71.87	0.930733	0.864601			26.111	1.368	1.44159	0.0164571			19.844	44.622	1.09559	0.536806					12.723	64.873	0.972621	0.929749			91.266	0.478	6.97691	0.00685062			17.226	30.211	1.31686	0.432979				16.474	66.815	0.681928	0.519058			23.457	0.569
			16.194	69.322	0.894073	0.833948			19.499	2.694	1.07654	0.032409			20.076	52.635	1.1084	0.633203					13.038	69.004	0.996702	0.988954			16.589	0.748	1.26816	0.0107202			24.083	57.759	1.84105	0.827792				15.488	91.751	0.641114	0.712775			20.849	0.692
			17.354	82.609	0.958117	0.993792			35.085	0.797	1.93705	0.00958796			19.988	55.315	1.10354	0.665443					12.707	71.595	0.971398	1.02609			99.097	1.754	7.57556	0.025138			22.291	50.555	1.70406	0.724546				20.346	111.392	0.842207	0.865357			29.387	1.05
			16.274	76.773	0.89849	0.923584			116.682	0.665	6.44203	0.00799999			16.788	47.322	0.926868	0.569287					11.697	60.235	0.894188	0.863278			37.354	0.725	2.85556	0.0103906			17.649	37.305	1.34919	0.534649				20.5	103.112	0.848581	0.801034			12.335	8.382
			19.625	92.634	1.0835	1.11439			19.686	0.369	1.08687	0.00443909			20.625	67.012	1.13871	0.806159					8.467	40.238	0.647267	0.576684			47.52	0.707	3.63271	0.0101326			19.326	41.876	1.47739	0.60016				14.835	57.271	0.614083	0.444914			12.527	23.64
			17.959	77.511	0.991519	0.932462			19.999	0.416	1.10415	0.00500451			17.717	41.898	0.978158	0.504036					12.615	70.901	0.964365	1.01614			114.581	0.697	8.75925	0.00998929			20.032	35.049	1.53136	0.502316				18.377	114.249	0.760702	0.887552			15.634	0.621
			16.884	64.905	0.932168	0.780811			16.642	0.634	0.918808	0.00762706			19.234	58.386	1.06191	0.702387					12.789	63.568	0.977667	0.911046			31.96	0.456	2.44321	0.00653532			20.135	34.286	1.53924	0.491381				16.817	94.204	0.696127	0.731831			8.167	0.7
			12.31	54.082	0.679637	0.65061			63.017	1.037	3.47918	0.0124752			17.647	35.352	0.974294	0.425287					11.006	55.19	0.841364	0.790974			31.056	0.658	2.3741	0.00943035			26.706	81.836	2.04156	1.17286				23.208	143.431	0.960677	1.11425			18.797	1.253
			17.775	76.402	0.981361	0.919121			17.97	2.65	0.992127	0.0318797			18.427	34.789	1.01736	0.418514					12.598	63.851	0.963065	0.915102			201.081	0.653	15.3718	0.00935869			23.144	63.854	1.76926	0.915145				17.554	85.841	0.726634	0.666862			134.651	2.401
			17.401	70.677	0.960712	0.850249			18.888	0.6	1.04281	0.00721804			17.599	44.959	0.971644	0.54086					10.383	56.31	0.793738	0.807026			114.112	1.818	8.72339	0.0260553			26.994	76.696	2.06358	1.09919				23.676	146.024	0.98005	1.1344			12.963	4.738
			17.271	85.291	0.953535	1.02606			43.237	1.206	2.38712	0.0145083			17.87	43.868	0.986606	0.527735					11.618	61.998	0.888148	0.888545			33.785	0.718	2.58272	0.0102903			15.874	26.181	1.2135	0.375222				20.335	112.459	0.841751	0.873647			9.107	0.687
			17.899	76.643	0.988207	0.92202			17.593	1.707	0.971312	0.0205353			18.556	43.816	1.02448	0.527109					10.758	55.638	0.822405	0.797395			31.141	0.764	2.3806	0.0109495			23.029	34.861	1.76047	0.499622				19.667	103.617	0.8141	0.804957			24.778	0.681
			18.676	97.994	1.03111	1.17887			26.959	0.529	1.48841	0.0063639			18.251	43.889	1.00764	0.527988					13.211	73.876	1.00993	1.05878			80.678	0.61	6.1675	0.00874242			14.233	28.107	1.08805	0.402825				17.642	98.05	0.730277	0.761709			51.19	1.692
			18.906	86.465	1.0438	1.04018			39.203	1.103	2.1644	0.0132692			17.859	47.396	0.985998	0.570177					12.946	72.759	0.989669	1.04277			135.344	0.718	10.3465	0.0102903			20.815	51.665	1.59122	0.740454				17.521	93.985	0.725268	0.73013			17.571	0.789
			17.255	79.547	0.952651	0.956956			22.068	0.657	1.21838	0.00790375			18.945	51.626	1.04596	0.621064					8.026	33.986	0.613555	0.487082			11.084	0.871	0.847326	0.012483			20.903	35.595	1.59795	0.510142				13.172	59.083	0.545245	0.458991			36.572	1.068
			16.011	78.025	0.88397	0.938646			16.639	0.617	0.918642	0.00742255			20.284	49.591	1.11988	0.596583					13.398	66.45	1.02422	0.95235			36.464	0.78	2.78752	0.0111788			21.44	49.189	1.639	0.704969				20.501	110.369	0.848623	0.85741			33.469	1.152
			14.921	57.64	0.823791	0.693413			9.557	3.01	0.527644	0.0362105			15.059	27.801	0.83141	0.334448					10.73	56.882	0.820265	0.815223			24.823	0.704	1.89762	0.0100896			23.613	46.828	1.80512	0.671131				14.238	69.395	0.589371	0.5391			41.877	1.038
			19.49	104.351	1.07605	1.25535			12.106	4.12	0.668374	0.0495639			14.911	26.421	0.823239	0.317846					12.998	73.824	0.993644	1.05803			75.155	0.544	5.74529	0.00779652			14.733	16.159	1.12628	0.231588				19.558	100.759	0.809588	0.782754			24.891	1.527
			17.473	90.846	0.964687	1.09288			13.127	3.915	0.724744	0.0470977			15.077	27.296	0.832404	0.328373					10.422	58.92	0.796719	0.844432			41.071	1.049	3.13971	0.0150341			20.599	30.301	1.57471	0.434269				14.451	65.451	0.598188	0.508461			34.817	1.38
			18.74	96.389	1.03464	1.15957			26.202	0.387	1.44662	0.00465564			15.13	27.142	0.83533	0.32652					9.704	53.833	0.741831	0.771526			79.125	1.605	6.04878	0.0230026			23.94	13.991	1.83011	0.200517				18.652	91.767	0.772085	0.712899			25.444	0.716
			20.752	108.725	1.14572	1.30797			10.864	11.3	0.599803	0.13594			19.315	49.636	1.06638	0.597124					13.579	64.807	1.03806	0.928803			28.862	0.567	2.20638	0.00812615			22.584	40.97	1.72645	0.587175				9.435	40.185	0.390554	0.31218			13.436	0.888
			18.685	100.51	1.0316	1.20914			16.257	0.641	0.897552	0.00771127			17.573	37.114	0.970208	0.446484					12.313	64.349	0.941278	0.922239			32.711	0.583	2.50062	0.00835546			18.54	35.819	1.41731	0.513352				22.363	115.385	0.925699	0.896377			12.668	14.351
			17.344	76.853	0.957565	0.924547			19.286	0.592	1.06478	0.0071218			18.176	35.934	1.0035	0.432288					13.061	66.116	0.99846	0.947564			25.188	1.215	1.92552	0.0174132			22.131	66.263	1.69182	0.94967				18.703	107.154	0.774196	0.832434			125.324	2.843
			16.532	79.918	0.912734	0.961419			15.117	3.542	0.834612	0.0426105			16.233	28.266	0.896227	0.340042					12.501	69.952	0.95565	1.00254			16.708	0.902	1.27726	0.0129273			21.03	53.461	1.60766	0.766194				22.865	140.981	0.946479	1.09522			14.44	0.897
			17.775	83.828	0.981361	1.00846			18.021	0.542	0.994942	0.0065203			18.096	44.653	0.999083	0.537179					12.28	68.688	0.938756	0.984425			121.182	2.363	9.26387	0.0338661			19.526	39.431	1.49268	0.565119				18.549	97.068	0.767821	0.75408			16.633	0.708
			19.607	102.73	1.08251	1.23585			28.97	0.661	1.59944	0.00795187			17.453	47.304	0.963583	0.56907					13.779	77.467	1.05335	1.11024			34.038	0.549	2.60207	0.00786818			14.773	28.42	1.12934	0.407311				19.611	98.666	0.811782	0.766495			22.347	0.847
			20.482	107.694	1.13081	1.29557			36.698	0.68	2.0261	0.00818044			18.149	52.543	1.00201	0.632096					13.385	74.33	1.02323	1.06529			199.922	0.812	15.2832	0.0116374			20.925	40.142	1.59963	0.575308				21.153	105.259	0.875612	0.817713			27.82	0.725
			18.035	87.989	0.995715	1.05851			13.985	8.81	0.772114	0.105985			18.365	35.865	1.01393	0.431458					14.427	85.431	1.10289	1.22438			75.193	1.634	5.7482	0.0234182			20.284	40.908	1.55063	0.586287				20.036	97.086	0.829375	0.75422			32.661	0.942
			17.258	90.596	0.952817	1.08988			57.628	0.645	3.18165	0.00775939			16.601	34.264	0.916544	0.412198					13.395	74.621	1.02399	1.06946			27.538	0.536	2.10517	0.00768186			25.115	73.485	1.91994	1.05317				20.479	114.443	0.847712	0.889059			42.937	1.044
			10.069	32.669	0.555911	0.39301			16.443	6.364	0.907821	0.0765593			18.505	44.71	1.02166	0.537864					13.687	74.688	1.04632	1.07042			18.157	0.389	1.38803	0.00557508			25.446	67.608	1.94524	0.968947				16.065	80.979	0.664998	0.629092			12.406	2.429
			12.585	38.094	0.69482	0.458273			46.333	0.853	2.55805	0.0102616			16.238	37.627	0.896503	0.452655					13.832	80.523	1.0574	1.15404			30.594	0.591	2.33879	0.00847011			24.77	71.805	1.89357	1.0291				19.364	107.966	0.801558	0.838742			21.774	3.403
			17.901	78.068	0.988317	0.939163			13.089	4.924	0.722646	0.059236			12.975	31.975	0.716352	0.384661					14.1	74.314	1.07789	1.06506			96.633	0.491	7.3872	0.00703693			20.511	25.409	1.56798	0.364158				24.476	129.782	1.01316	1.00822			18.684	0.726
			22.1	109.854	1.22014	1.32155			14.306	3.889	0.789837	0.0467849			18.622	57.13	1.02812	0.687278					13.218	79.668	1.01046	1.14179			160.546	0.646	12.2731	0.00925836			23.498	46.703	1.79633	0.66934				19.538	108.05	0.80876	0.839395			46.303	1.166
			18.467	87.46	1.01957	1.05215			23.146	0.372	1.27789	0.00447518			21.401	68.775	1.18155	0.827368					13.071	69.864	0.999224	1.00128			29.539	0.608	2.25814	0.00871376			15.651	17.991	1.19645	0.257844				20.416	130.623	0.845104	1.01475			21.856	0.681
			12.261	44.369	0.676932	0.533762			16.212	5.121	0.895067	0.061606			19.069	50.185	1.0528	0.603729					12.469	70.939	0.953204	1.01669			29.112	0.461	2.22549	0.00660698			26.521	75.221	2.02742	1.07805				18.015	92.543	0.745717	0.718928			120.657	2.73
			16.966	84.308	0.936696	1.01423			14.204	5.436	0.784205	0.0653954			21.045	51.98	1.1619	0.625323					13.242	78.002	1.0123	1.11791			38.544	1.206	2.94653	0.0172842			24.838	74.377	1.89876	1.06596				22.142	122.341	0.916551	0.950416			36.775	1.003
			16.391	80.567	0.90495	0.969226			17.416	0.749	0.96154	0.00901052			17.447	28.113	0.963252	0.338201					8.049	33.5	0.615313	0.480116			30.341	0.729	2.31945	0.0104479			26.167	70.648	2.00036	1.01252				23.171	107.272	0.959145	0.833351			12.612	13.095
			20.073	92.804	1.10823	1.11644			14.402	0.554	0.795137	0.00666466			18.008	52.724	0.994225	0.634273					15.177	77.164	1.16022	1.1059			74.062	0.471	5.66174	0.00675029			25.708	62.947	1.96527	0.902146				17.099	92.757	0.7078	0.72059			15.72	0.765
			18.366	78.723	1.01399	0.947043			13.95	6.59	0.770182	0.0792781			21.278	73.871	1.17476	0.888673					14.35	78.36	1.097	1.12304			19.786	0.358	1.51256	0.0051308			24.986	54.805	1.91008	0.785456				22.444	134.909	0.929052	1.04805			34.457	1.753
			18.806	90.754	1.03828	1.09178			34.391	0.693	1.89873	0.00833684			19.597	57.617	1.08195	0.693136					13.045	72.717	0.997237	1.04217			60.879	1.585	4.65395	0.022716			23.278	35.761	1.77951	0.512521				22.706	142.211	0.939897	1.10478			16.481	0.9
			22.166	105.522	1.22379	1.26944			17.884	0.74	0.987379	0.00890225			15.817	33.81	0.873259	0.406737					12.363	67.177	0.945101	0.96277			147.835	0.661	11.3014	0.00947334			26.486	52.756	2.02475	0.75609				16.08	83.592	0.665619	0.649391			52.147	0.876
			20.894	105.327	1.15356	1.26709			61.131	1.48	3.37505	0.0178045			18.029	61.361	0.995384	0.738177					11.811	66.506	0.902903	0.953153			70.226	0.502	5.36849	0.00719458			24.6	66.386	1.88057	0.951433				20.848	121.678	0.862987	0.945265			21.226	0.602
			19.118	84.391	1.05551	1.01523			47.77	3.432	2.63739	0.0412872			21.306	53.874	1.17631	0.648108					13.704	78.188	1.04761	1.12058			11.289	6.762	0.862998	0.0969119			29.596	76.122	2.26249	1.09097				16.1	66.982	0.666447	0.520355			13.006	0.862
			16.53	74.967	0.912624	0.901858			15.662	0.844	0.864702	0.0101534			18.051	24.899	0.996599	0.299537					11.501	66.324	0.879204	0.950545			13.145	3.491	1.00488	0.0500324			27.082	63.994	2.07031	0.917151				14.049	60.694	0.581547	0.471506			20.43	1.016
			19.946	98.079	1.10122	1.1799			12.082	1.622	0.667049	0.0195128			16.638	29.222	0.918587	0.351543					13.908	73.43	1.06321	1.05239			21.209	1.192	1.62134	0.0170835			21.974	48.643	1.67982	0.697143				18.744	98.443	0.775893	0.764762			41.433	1.223
			16.167	75.499	0.892583	0.908258			48.694	0.651	2.6884	0.00783157			23.747	74.24	1.31108	0.893112					12.736	65.27	0.973615	0.935439			35.055	1.042	2.67981	0.0149338			28.133	73.882	2.15065	1.05886				22.505	135.262	0.931577	1.05079			30.344	0.837
			17.437	77.532	0.9627	0.932715			10.715	1.85	0.591577	0.0222556			20.364	62.473	1.1243	0.751554					13.362	73.58	1.02147	1.05454			68.842	1.142	5.26269	0.016367			21.882	43.434	1.67279	0.622489				19.051	93.145	0.788601	0.723604			11.647	23.927
			18.254	85.64	1.00781	1.03025			13.533	17.606	0.747159	0.211801			20.365	61.332	1.12435	0.737828					14.241	73.81	1.08867	1.05783			34.313	1.078	2.62309	0.0154497			25.891	66.525	1.97926	0.953425				18.721	103.223	0.774941	0.801896			28.123	0.75
			17.927	81.607	0.989753	0.981738			14.502	3.263	0.800658	0.0392541			18.277	53.93	1.00908	0.648781					13.79	81.024	1.05419	1.16122			36.394	0.588	2.78217	0.00842712			24.975	49.261	1.90924	0.706				18.422	98.664	0.762564	0.766479			12.939	1.185
			15.205	68.575	0.839471	0.824962			21.316	0.752	1.17686	0.00904661			17.97	53.295	0.992127	0.641142					14.107	84.644	1.07842	1.2131			26.861	2.14	2.05341	0.0306701			26.307	82.734	2.01106	1.18573				21.3	132.76	0.881697	1.03136			34.229	0.869
			16.011	69.302	0.88397	0.833708			39.772	0.736	2.19582	0.00885413			22.493	66.733	1.24184	0.802802					12.266	78.091	0.937685	1.11919			21.854	0.791	1.67065	0.0113365			29.893	89.022	2.2852	1.27585				22.126	120.557	0.915888	0.936556			12.832	13.992
			17.822	91.495	0.983956	1.10069			28.087	0.629	1.55069	0.00756691			19.051	55.927	1.05181	0.672805					11.888	71.546	0.908789	1.02539			42.319	0.947	3.23511	0.0135722			24.164	76.07	1.84724	1.09022				13.196	58.637	0.546238	0.455526			28.425	0.765
			19.034	84.871	1.05087	1.021			16.438	1.304	0.907545	0.0156872			19.854	65.3	1.09614	0.785563					12.451	65.957	0.951828	0.945285			22.517	0.449	1.72133	0.00643499			20.442	32.047	1.56271	0.459292				16.606	85.179	0.687392	0.66172			26.452	0.774
			16.589	83.735	0.915881	1.00734			14.366	0.976	0.793149	0.0117413			21.927	69.355	1.21059	0.834345					14.202	83.126	1.08568	1.19135			10.526	12.165	0.80467	0.174347			16.748	33.544	1.28032	0.480747				20.054	106.288	0.83012	0.825707			57.35	1.364
			17.975	77.558	0.992403	0.933028			22.566	0.691	1.24587	0.00831278			21.593	45.775	1.19215	0.550676					14.728	80.19	1.1259	1.14927			10.993	5.375	0.84037	0.0770336			26.62	69.722	2.03499	0.999244				20.456	116.805	0.84676	0.907409			18.465	0.75
			17.263	80.524	0.953093	0.968709			36.962	0.638	2.04068	0.00767518			18.724	52.425	1.03376	0.630676					12.671	63.513	0.968646	0.910258			85.805	0.858	6.55944	0.0122967			21.894	50.161	1.67371	0.718899				20.383	95.187	0.843738	0.739468			15.292	0.81
			19.649	97.63	1.08482	1.1745			11.585	1.934	0.63961	0.0232661			15.596	43.819	0.861058	0.527145					12.919	70.306	0.987605	1.00761			31.687	0.8	2.42234	0.0114655			24.871	74.137	1.90129	1.06252				22.36	123.436	0.925575	0.958922			32.406	0.798
			18.987	96.478	1.04828	1.16064			19.492	0.607	1.07616	0.00730225			18.358	43.217	1.01355	0.519903					13.693	78.649	1.04677	1.12718			89.06	1.09	6.80827	0.0156217			23.567	49.669	1.8016	0.711848				21.58	123.783	0.893287	0.961618			63.944	1.874
			17.572	83.202	0.970153	1.00093			12.33	9.542	0.680741	0.114791			20.393	56.483	1.1259	0.679494					13.865	72.321	1.05992	1.03649			20.012	0.597	1.52984	0.0085561			25.99	68.897	1.98683	0.98742				18.592	81.739	0.769601	0.634996			23.368	1
			16.369	73.83	0.903735	0.88818			13.688	4.895	0.755717	0.0588872			15.132	44.596	0.83544	0.536493					13.105	71.487	1.00182	1.02454			104.656	1.397	8.00052	0.0200216			21.996	77.151	1.6815	1.10572				16.869	83.903	0.698279	0.651807			30.169	1.146
			19.864	94.58	1.09669	1.1378			14.359	0.652	0.792763	0.0078436			12.028	33.942	0.664068	0.408324					14.067	72.693	1.07536	1.04182			90.068	1.44	6.88533	0.0206378			24.616	54.121	1.88179	0.775653				17.051	76.419	0.705813	0.593667			11.209	11.076
			19.597	93.795	1.08195	1.12836			22.141	0.645	1.22241	0.00775939			18.863	39.725	1.04143	0.477894					12.78	69.578	0.976979	0.99718			29.221	0.872	2.23383	0.0124974			25.189	56.893	1.9256	0.815381				22.009	136.668	0.911045	1.06172			55.278	1.028
			18.221	83.07	1.00598	0.999338			25.386	0.67	1.40157	0.00806014			20.152	42.648	1.1126	0.513058					15.132	80.325	1.15678	1.1512			26.297	0.415	2.0103	0.00594771			24.045	59.586	1.83814	0.853977				14.145	70.318	0.585521	0.546271			62.292	2.451
			18.936	87.89	1.04546	1.05732			35.655	0.718	1.96852	0.00863759			19.658	43.708	1.08532	0.52581					13.141	77.734	1.00458	1.11407			37.883	0.749	2.896	0.0107345			23.812	63.935	1.82033	0.916306				16.917	73.244	0.700266	0.569002			27.603	0.834
			20.029	109.513	1.1058	1.31745			88.011	0.553	4.8591	0.00665263			19.452	40.568	1.07395	0.488036					12.62	71.804	0.964747	1.02908			47.885	0.535	3.66061	0.00766753			21.941	39.695	1.6773	0.568902				20.364	116.688	0.842952	0.9065			11.486	21.222
			22.975	105.553	1.26845	1.26981			28.8	0.907	1.59005	0.0109113			16.179	31.595	0.893245	0.38009					13.672	77.909	1.04517	1.11658			24.409	1.018	1.86597	0.0145898			24.818	68.185	1.89723	0.977216				15.182	70.339	0.628447	0.546434			25.672	0.885
			19.466	92.6	1.07472	1.11398			103.008	0.644	5.68709	0.00774736			21.308	71.294	1.17642	0.857671					13.05	67.922	0.997619	0.973447			61.716	1.411	4.71794	0.0202222			22.336	51.653	1.7075	0.740282				21.117	111.109	0.874122	0.863159			11.706	2.75
			16.927	81.434	0.934542	0.979656			12.369	6.623	0.682895	0.0796751			19.456	59.702	1.07417	0.718219					14.626	75.984	1.1181	1.08899			56.585	0.82	4.32569	0.0117521			22.139	65.323	1.69244	0.936198				17.533	100.531	0.725765	0.780983			38.985	0.956
			18.062	86.945	0.997206	1.04595			33.148	0.632	1.83011	0.007603			19.014	47.433	1.04977	0.570622					12.957	76.15	0.99051	1.09137			24.013	0.768	1.8357	0.0110068			22.08	49.114	1.68793	0.703894				16.472	84.552	0.681846	0.656849			25.132	0.793
			17.378	84.026	0.959442	1.01084			35.295	0.555	1.94864	0.00667669			13.19	0.889	0.728222	0.0106947					12.719	65.512	0.972315	0.938907			89.959	0.989	6.877	0.0141742			22.641	70.7	1.73081	1.01326				19.75	115.642	0.817536	0.898374			16.959	1.542
			22.125	106.847	1.22152	1.28538			12.058	1.112	0.665724	0.0133774			18.682	64.414	1.03144	0.774905					14.56	79.539	1.11305	1.13994			27.593	0.361	2.10937	0.00517379			23.182	46.539	1.77217	0.666989				18.845	83.531	0.780074	0.648917			11.973	8.783
			20.903	89.53	1.15406	1.07705			9.218	0.906	0.508927	0.0108992			13.122	39.092	0.724468	0.470279					14.106	75.768	1.07835	1.08589			87.346	0.641	6.67724	0.00918671			22.598	49.693	1.72752	0.712192				20.847	114.805	0.862945	0.891872			31.715	0.732
			18.465	88.182	1.01946	1.06084			13.75	17.805	0.75914	0.214195			14.238	27.16	0.786082	0.326737					13.441	77.107	1.02751	1.10508			68.497	0.72	5.23632	0.0103189			23.805	66.791	1.81979	0.957238				17.191	67.314	0.711608	0.522934			9.962	13.598
			20.692	100.298	1.14241	1.20659			19.121	0.451	1.05567	0.00542556			13.561	37.446	0.748705	0.450478					12.379	63.277	0.946324	0.906875			87.829	0.508	6.71417	0.00728057			23.923	77.109	1.82882	1.10511				16.71	79.63	0.691697	0.618612			13.851	17.867
			14.805	68.513	0.817386	0.824216			10.319	3.559	0.569714	0.042815			14.58	38.579	0.804964	0.464108					13.661	69.386	1.04433	0.994429			46.684	0.55	3.5688	0.00788251			22.928	57.629	1.75275	0.825929				20.827	103.972	0.862117	0.807715			36.554	0.781
			17.709	86.711	0.977717	1.04314			35.497	0.94	1.9598	0.0113083			18.09	58.355	0.998752	0.702014					13.02	70.451	0.995326	1.00969			17.585	0.477	1.3443	0.00683628			22.801	50.602	1.74304	0.725219				20.604	120.75	0.852886	0.938056			15.365	0.722
			20.744	102.99	1.14528	1.23898			9.774	5.005	0.539624	0.0602105			13.225	32.405	0.730154	0.389834					11.935	60.986	0.912382	0.874041			26.177	0.908	2.00112	0.0130133			21.958	56.386	1.6786	0.808115				23.859	133.149	0.987625	1.03438			68.219	1.343
			19.261	93.641	1.0634	1.12651			10.333	1.744	0.570487	0.0209804			12.643	32.784	0.698022	0.394394					12.954	77.964	0.99028	1.11737			17.952	24.138	1.37236	0.345942			23.532	55.424	1.79892	0.794328				16.746	82.494	0.693188	0.640861			18.245	0.785
			18.028	83.555	0.995329	1.00517			28.96	0.53	1.59889	0.00637593			19.373	45.061	1.06959	0.542087					13.222	65.528	1.01077	0.939136			67.297	5.097	5.14458	0.0730494			28.621	65.934	2.18796	0.944955				7.649	23.198	0.316624	0.180215			12.725	10.511
			18.945	90.691	1.04596	1.09102			17.449	0.463	0.963362	0.00556992			16.324	43.833	0.901251	0.527314					13.279	66.893	1.01513	0.958699			96.459	1.623	7.3739	0.0232606			22.49	64.532	1.71927	0.924862				18.67	95.496	0.77283	0.741868			30.542	1.138
			19.672	86.599	1.08609	1.04179			64.784	0.832	3.57674	0.010009			15.003	41.251	0.828318	0.496252					14.233	79.113	1.08805	1.13383			34.794	14.179	2.65986	0.203211			21.97	54.029	1.67952	0.774335				22.345	128.244	0.924954	0.996274			12.85	16.279
			17.375	79.762	0.959277	0.959542			19.867	0.792	1.09686	0.00952781			21.065	58.086	1.163	0.698778					15.89	91.033	1.21473	1.30467			31.991	5.447	2.44558	0.0780655			25.644	76.901	1.96038	1.10213				21.804	133.284	0.90256	1.03543			27.121	0.853
			16.126	76.651	0.890319	0.922117			8.266	0.81	0.456367	0.00974435			16.929	48.305	0.934653	0.581112					14.37	85.258	1.09853	1.2219			55.887	6.089	4.27233	0.0872665			22.365	50.266	1.70971	0.720404				13.981	72.857	0.578733	0.565995			11.398	15.194
			23.252	105.964	1.28375	1.27475			11.738	4.345	0.648057	0.0522706			15.638	39.556	0.863377	0.475861					12.453	66.158	0.951981	0.948165			10.988	20.106	0.839988	0.288156			20.517	46.314	1.56844	0.663765				16.994	96.289	0.703453	0.748029			14.481	3.024
			17.625	82.683	0.973079	0.994682			11.424	1.128	0.630721	0.0135699			20.695	62.946	1.14257	0.757245					13.291	62.416	1.01604	0.894536			52.585	0.862	4.01991	0.012354			18.552	45.252	1.41822	0.648544				18.632	82.703	0.771257	0.642485			30.526	1.423
			19.92	94.962	1.09979	1.1424			12.338	1.587	0.681183	0.0190917			12.414	26.867	0.685379	0.323212					12.938	76.439	0.989057	1.09551			124.62	5.298	9.52669	0.0759301			19.488	36.803	1.48978	0.527454				19.803	111.608	0.81973	0.867035			31.442	0.987
			19.766	93.671	1.09128	1.12687			24.227	0.606	1.33758	0.00729022			17.763	43.841	0.980698	0.52741					14.916	82.95	1.14027	1.18883			41.108	3.327	3.14254	0.047682			22.482	61.489	1.71866	0.88125				11.752	46.477	0.486465	0.36106			12.492	29.436
			17.073	84.055	0.942603	1.01119			10.35	6.396	0.571425	0.0769443			16.323	47.86	0.901196	0.575759					14.406	82.454	1.10128	1.18172			20.959	5.939	1.60223	0.0851168			19.287	29.67	1.47441	0.425226				21.463	94.151	0.888444	0.731419			27.6	1.606
			14.726	58.156	0.813025	0.69962			12.049	1.074	0.665227	0.0129203			14.18	31.336	0.78288	0.376974					14.651	81.079	1.12001	1.16201			103.355	2.6	7.90107	0.0372628			24.299	75.813	1.85756	1.08654				11.583	42.453	0.479469	0.329799			8.717	8.274
			14.761	73.714	0.814957	0.886784			9.723	1.101	0.536808	0.0132451			18.881	58.379	1.04242	0.702303					12.671	69.374	0.968646	0.994257			63.028	5.109	4.81823	0.0732213			21.303	55.777	1.62853	0.799387				22.139	130.433	0.916427	1.01328			10.347	17.087
			18.167	81.558	1.003	0.981148			12.367	13.447	0.682784	0.161768			16.509	44.013	0.911465	0.529479					13.336	74.803	1.01948	1.07206			70.455	1.115	5.386	0.01598			22.219	56.482	1.69855	0.809491				20.3	104.564	0.840303	0.812314			11.111	7.858
			21.761	118.043	1.20143	1.42007			33.577	0.814	1.85379	0.00979247			15.666	51.712	0.864922	0.622099					12.809	61.6	0.979196	0.882841			24.057	0.895	1.83906	0.012827			21.592	40.605	1.65062	0.581944				12.585	50.645	0.520946	0.39344			17.615	1.014
			18.75	101.736	1.03519	1.22389			10.465	1.26	0.577774	0.0151579			18.715	49.652	1.03326	0.597317					8.948	41.41	0.684038	0.593481			140.742	0.603	10.7591	0.0086421			25.029	62.693	1.91336	0.898506				18.445	105.897	0.763516	0.822669			28.81	1.077
			21.98	111.96	1.21352	1.34689			26.583	0.478	1.46765	0.00575037			16.404	42.64	0.905668	0.512962					13.784	76.58	1.05373	1.09753			32.521	14.821	2.4861	0.212412			25.281	62.276	1.93263	0.892529				17.116	80.646	0.708503	0.626505			25.081	0.826
			13.034	45.831	0.719609	0.55135			11.842	3.956	0.653799	0.0475909			18.692	25.577	1.03199	0.307693					13.612	78.155	1.04058	1.1201			22.906	0.908	1.75107	0.0130133			23.386	50.27	1.78776	0.720461				15.688	79.375	0.649393	0.616631			10.796	2.064
			17.868	67.679	0.986495	0.814183			15.218	0.751	0.840188	0.00903458			18.26	34.519	1.00814	0.415266					14.14	77.872	1.08095	1.11605			57.301	5.082	4.38043	0.0728344			19.633	48.948	1.50086	0.701515				18.883	102.54	0.781647	0.79659			16.484	0.751
			19.243	83.637	1.06241	1.00616			14.076	0.57	0.777138	0.00685714			11.065	0.82	0.6109	0.00986465					14.45	78.422	1.10464	1.12393			26.224	40.075	2.00472	0.574348			21.517	47.754	1.64489	0.684402				24.675	151.518	1.0214	1.17708			11.563	11.776
			18.623	89.717	1.02818	1.0793			9.883	7.746	0.545642	0.0931849			15.054	49.429	0.831134	0.594634					13.689	83.846	1.04647	1.20167			15.535	37.919	1.18759	0.543449			24.205	54.893	1.85037	0.786717				17.051	75.849	0.705813	0.589239			32.05	0.798
			12.451	37.99	0.687422	0.457022			26.942	0.435	1.48747	0.00523308			18.939	59.5	1.04563	0.715789					14.009	78.425	1.07093	1.12397			86.672	4.049	6.62572	0.0580296			18.108	38.808	1.38428	0.55619				16.113	88.26	0.666985	0.685655			13.151	7.177
			21.481	96.845	1.18597	1.16505			35.613	0.561	1.9662	0.00674887			17.221	49.198	0.950774	0.591855					13.946	73.016	1.06611	1.04645			85.24	4.257	6.51625	0.0610106			17.269	37.374	1.32014	0.535638				22.722	118.116	0.940559	0.917593			12.125	22.643
			16.25	75.31	0.897165	0.905984			10.34	6.199	0.570873	0.0745744			15.198	49.158	0.839084	0.591374					13.26	73.489	1.01367	1.05323			31.594	18.353	2.41523	0.263032			23.67	59.373	1.80947	0.850924				18.534	93.475	0.7672	0.726168			9.917	1.919
			16.079	74.946	0.887724	0.901605			11.86	11.796	0.654793	0.141907			17.439	43.156	0.96281	0.51917					10.945	55.476	0.8367	0.795073			35.069	7.211	2.68088	0.103347			28.527	75.551	2.18077	1.08278				20.184	104.841	0.835501	0.814465			18.414	0.682
			15.783	79.36	0.871382	0.954706			10.924	5.174	0.603116	0.0622436			16.027	38.071	0.884853	0.457997					15.163	85.122	1.15915	1.21995			50.301	0.712	3.84531	0.0102043			25.081	61.397	1.91734	0.879932				16.453	72.619	0.681059	0.564146			22.146	0.62
			18.203	85.04	1.00499	1.02304			35.723	0.535	1.97227	0.00643609			16.26	54.47	0.897717	0.655278					14.949	77.11	1.14279	1.10513			74.489	0.653	5.69438	0.00935869			25.329	65.464	1.9363	0.938219				21.125	108.537	0.874453	0.843178			18.541	0.708
			16.944	83.634	0.935481	1.00612			19.915	0.538	1.09951	0.00647218			17.678	39.612	0.976005	0.476535					14.591	79.013	1.11542	1.1324			87.614	0.6	6.69773	0.0085991			22.032	47.369	1.68426	0.678885				17.312	81.975	0.716617	0.636829			25.603	2.051
			20.967	102.87	1.15759	1.23753			26.502	0.799	1.46318	0.00961202			14.771	46.68	0.815509	0.561563					11.055	58.192	0.845109	0.833998			77.596	2.376	5.9319	0.0340524			23.497	44.612	1.79625	0.639372				19.374	99.661	0.801972	0.774224			21.184	1.124
			19.653	92.713	1.08505	1.11534			10.11	6.678	0.558175	0.0803368			18.412	49.334	1.01653	0.593491					14.273	79.317	1.09111	1.13676			25.236	22.693	1.92919	0.325232			23.998	78.706	1.83455	1.128				18.886	99.381	0.781771	0.772049			30.775	0.688
			18.297	79.719	1.01018	0.959025			25.367	0.567	1.40052	0.00682105			19.547	25.612	1.07919	0.308114					13.681	70.77	1.04586	1.01426			75.407	4.963	5.76456	0.0711289			22.683	58.737	1.73402	0.841809				16.277	75.917	0.673774	0.589767			19.559	0.902
			21.367	105.245	1.17968	1.2661			17.991	0.464	0.993286	0.00558195			22.017	52.69	1.21556	0.633864					14.875	86.193	1.13713	1.2353			31.542	27.417	2.41126	0.392936			21.62	40.884	1.65276	0.585943				18.682	103.004	0.773327	0.800195			13.032	21.174
			20.935	102.491	1.15582	1.23297			66.473	0.577	3.66999	0.00694135			20.253	36.444	1.11817	0.438424					13.317	67.369	1.01803	0.965521			41.878	22.409	3.2014	0.321162			22.578	45.295	1.726	0.64916				16.712	77.887	0.69178	0.605071			12.382	19.751
			21.552	97.449	1.18989	1.17232			17.206	3.759	0.949946	0.045221			19.687	54.054	1.08692	0.650273					13.532	73.578	1.03447	1.05451			51.156	3.187	3.91067	0.0456756			19.371	28.66	1.48083	0.41075				16.752	100.029	0.693436	0.777083			10.647	16.882
			15.854	87.398	0.875302	1.0514			11.252	0.77	0.621225	0.00926315			15.713	45.151	0.867517	0.543169					15.168	86.319	1.15953	1.23711			100.048	6.423	7.64826	0.0920534			22.181	47.358	1.69565	0.678727				17.909	91.86	0.741329	0.713622			14.739	7.637
			14.843	63.547	0.819484	0.764475			26.356	0.701	1.45512	0.00843308			19.473	50.878	1.07511	0.612066					13.33	68.009	1.01902	0.974694			14.149	8.47	1.08163	0.121391			20.37	37.405	1.5572	0.536082				18.508	96.121	0.766124	0.746723			12.08	1.257
			16.212	78.471	0.895067	0.944011			40.157	0.425	2.21707	0.00511278			16.944	37.429	0.935481	0.450273					10.551	60.355	0.806581	0.864998			31.689	18.1	2.42249	0.259406			25.343	62.432	1.93737	0.894765				15.716	51.544	0.650552	0.400424			19.489	0.712
			20.315	101.883	1.12159	1.22566			25.086	7.871	1.385	0.0946886			18.32	59.862	1.01145	0.720144					12.746	69.413	0.974379	0.994816			37.318	2.203	2.85281	0.031573			23.077	49.876	1.76414	0.714815				23.301	133.085	0.964527	1.03388			12.572	17.506
			15.757	78.419	0.869947	0.943386			23.296	0.588	1.28618	0.00707368			9.183	2.097	0.506995	0.025227					13.462	71.938	1.02911	1.031			96.249	2.21	7.35784	0.0316734			22.058	53.248	1.68624	0.763142				18.556	97.047	0.768111	0.753917			12.699	7.782
			14.874	70.939	0.821196	0.853401			21.176	0.761	1.16913	0.00915488			17.829	45.875	0.984342	0.551879					13.148	81.683	1.00511	1.17067			203.991	3.13	15.5943	0.0448586			25.593	65.515	1.95648	0.93895				18.471	94.327	0.764593	0.732787			12.088	3.036
			18.795	77.434	1.03768	0.931536			9.827	8.472	0.54255	0.101919			8.847	17.364	0.488444	0.20889					12.839	72.977	0.981489	1.04589			71.651	4.514	5.47743	0.0646939			24.821	59.137	1.89746	0.847542				15.861	80.093	0.656554	0.622209			13.003	8.563
			21.35	100.028	1.17874	1.20334			15.73	0.849	0.868456	0.0102135			15.913	47.329	0.878559	0.569371					13.553	71.613	1.03607	1.02635			84.01	0.577	6.42222	0.00826947			28.708	126.604	2.19461	1.81447				17.214	87.257	0.71256	0.677863			12.28	1.168
			15.32	51.715	0.84582	0.622135			12.674	14.901	0.699734	0.17926			21.473	58.091	1.18553	0.698839					15.212	85.545	1.1629	1.22602			33.93	21.574	2.59381	0.309195			23.714	55.498	1.81284	0.795388				19.228	96.943	0.795928	0.753109			22.859	0.761
			18.142	79.286	1.00162	0.953816			21.87	0.62	1.20745	0.00745864			15.631	31.251	0.86299	0.375952					14.277	81.969	1.09142	1.17477			116.434	10.053	8.9009	0.144078			25.26	86.377	1.93102	1.23794				19.836	110.263	0.821096	0.856587			14.585	1.175
			22.323	105.429	1.23246	1.26832			11.077	3.627	0.611563	0.043633			17.326	55.763	0.956571	0.670833					14.98	87.956	1.14516	1.26057			39.167	4.534	2.99416	0.0649805			24.325	51.082	1.85955	0.732099				22.008	119.48	0.911004	0.92819			11.282	18.73
			20.545	89.854	1.13429	1.08095			18.787	0.73	1.03723	0.00878195			9.637	23.742	0.53206	0.285618					14.149	80.446	1.08163	1.15294			19.991	17.72	1.52823	0.25396			22.041	46.114	1.68494	0.660898				21.111	114.593	0.873873	0.890225			12.249	10.51
			16.719	85.166	0.923059	1.02455			9.869	5.84	0.544869	0.0702556			17.061	60.915	0.941941	0.732811					12.674	62.374	0.968875	0.893934			104.597	1.919	7.99601	0.0275028			22.389	45.459	1.71155	0.651511				21.271	101.207	0.880496	0.786234			14.591	0.66
			15.341	76.142	0.846979	0.915993			9.575	7.069	0.528637	0.0850405			21.039	64.079	1.16157	0.770875					15.052	78.272	1.15066	1.12178			119.047	4.816	9.10066	0.0690221			26.275	73.289	2.00862	1.05037				11.492	44.756	0.475702	0.34769			6.784	0.966
			16.712	79.699	0.922672	0.958784			114.333	1.076	6.31234	0.0129444			15.531	41.75	0.857469	0.502255					13.778	73.05	1.05327	1.04694			27.5	45.58	2.10226	0.653245			24.846	77.87	1.89937	1.11602				19.891	111.453	0.823372	0.865831			18.972	1.015
			17.737	81.21	0.979263	0.976962			36.433	0.679	2.01147	0.00816841			18.593	27.167	1.02652	0.326821					14.311	69.15	1.09402	0.991046			82.712	1.405	6.32299	0.0201362			19.394	38.451	1.48259	0.551073				20.441	92.388	0.846139	0.717723			25.313	0.854
			16.22	92.593	0.895509	1.1139			11.661	11.189	0.643806	0.134604			12.507	29.552	0.690514	0.355512					14.796	79.285	1.13109	1.1363			227.408	3.801	17.3844	0.0544753			25.278	71.12	1.9324	1.01928				20.182	113.609	0.835418	0.88258			14.804	0.709
			21.801	104.698	1.20364	1.25952			97.507	1.409	5.38338	0.0169504			19.368	63.926	1.06931	0.769034					12.632	67.521	0.965665	0.9677			187.475	4.157	14.3317	0.0595774			24.893	68.449	1.90297	0.981				16.809	82.718	0.695795	0.642601			9.917	7.052
			16.156	77.248	0.891975	0.929299			187.792	0.824	10.368	0.00991277			17.911	45.213	0.988869	0.543915					12.456	68.794	0.95221	0.985944			131.038	4.288	10.0173	0.0614549			23.524	46.307	1.79831	0.663664				17.637	82.048	0.73007	0.637396			10.203	8.647
			17.353	78.456	0.958062	0.943831			47.403	1.299	2.61713	0.0156271			17.297	65.262	0.95497	0.785106					14.781	78.993	1.12995	1.13211			202.416	0.849	15.4739	0.0121677			25.434	32.634	1.94433	0.467705				23.566	127.227	0.975496	0.988373			16.002	3.335
			16.441	76.705	0.90771	0.922766			12.162	11.223	0.671466	0.135013			17.04	42.738	0.940781	0.514141					15.425	80.838	1.17918	1.15856			21.272	1.751	1.62616	0.025095			21.452	39.515	1.63992	0.566322				17.756	102.477	0.734996	0.796101			16.971	0.845
			18.691	87.558	1.03193	1.05333			9.371	8.075	0.517374	0.0971428			22.389	75.817	1.2361	0.912083					15.176	90.069	1.16014	1.29085			28.423	3.962	2.17282	0.0567827			19.26	49.267	1.47235	0.706086				13.605	60.79	0.563168	0.472252			12.761	0.752
			18.775	89.805	1.03657	1.08036			38.809	0.47	2.14265	0.00565413			19.519	65.119	1.07765	0.783386					16.16	91.52	1.23537	1.31165			29.842	4.762	2.2813	0.0682482			23.964	67.681	1.83195	0.969993				20.964	114.39	0.867788	0.888648			14.237	0.666
			21.844	100.265	1.20601	1.20619			10.096	7.887	0.557402	0.0948811			8.242	16.326	0.455042	0.196403					13.418	71.473	1.02575	1.02434			105.529	4.707	8.06726	0.0674599			20.976	55.594	1.60353	0.796764				18.971	99.241	0.78529	0.770961			10.003	5.395
			19.383	86.06	1.07014	1.03531			11.532	2.968	0.636684	0.0357052			18.182	53.907	1.00383	0.648505					14.452	68.228	1.1048	0.977832			176.519	7.43	13.4942	0.106486			17.254	53.812	1.319	0.771225				20.562	118.605	0.851148	0.921392			11.15	5.493
			14.715	60.366	0.812418	0.726207			11.308	7.668	0.624317	0.0922465			17.859	46.606	0.985998	0.560673					13.928	82.287	1.06474	1.17932			62.253	8.259	4.75899	0.118367			18.14	39.94	1.38673	0.572413				21.201	113.867	0.877599	0.884585			18.613	0.698
			21.168	101.034	1.16869	1.21545			107.656	1.596	5.94371	0.0192			10.012	21.276	0.552764	0.255952					13.838	73.079	1.05786	1.04736			70.767	7.581	5.40985	0.10865			21.481	57.116	1.64213	0.818577				17.363	95.848	0.718728	0.744603			23.591	0.529
			15.239	71.965	0.841348	0.865744			20.156	3.151	1.11282	0.0379067			12.711	24.611	0.701776	0.296072					13.582	68.018	1.03829	0.974823			10.639	7.924	0.813308	0.113565			22.479	60.294	1.71843	0.864124				20.079	116.37	0.831155	0.904029			23.613	0.708
			15.762	73.072	0.870223	0.879061			31.929	0.446	1.76281	0.00536541			18.658	70.061	1.03011	0.842838					15.695	88.17	1.19982	1.26364			83.637	2.25	6.39371	0.0322466			22.364	53.486	1.70964	0.766552				17.715	71.372	0.733299	0.554459			15.369	1.594
			19.013	88.696	1.04971	1.06702			18.895	5.219	1.0432	0.0627849			11.703	27.818	0.646125	0.334652					14.612	75.253	1.11703	1.07851			68.455	12.98	5.2331	0.186027			22.047	59.597	1.6854	0.854134				22.957	116.823	0.950287	0.907549			63.705	0.925
			22.865	103.451	1.26238	1.24452			27.274	0.631	1.5058	0.00759097			18.77	49.031	1.03629	0.589846					15.167	79.581	1.15946	1.14054			131.336	5.258	10.0401	0.0753568			21.26	58.149	1.62524	0.833382				15.874	72.977	0.657092	0.566928			12.625	6.647
			14.803	63.687	0.817276	0.766159			21.216	1.256	1.17134	0.0151098			17.07	46.097	0.942438	0.55455					12.756	67.274	0.975144	0.96416			39.828	2.02	3.04469	0.0289503			21.317	46.44	1.6296	0.66557				17.338	97.952	0.717693	0.760948			24.81	0.739
			17.598	86.786	0.971588	1.04404			12.265	7.162	0.677153	0.0861593			17.873	32.607	0.986771	0.392264					13.967	75.647	1.06772	1.08416			116.166	4.776	8.88041	0.0684488			19.949	44.005	1.52502	0.630672				22.672	134.175	0.93849	1.04235			12.756	20.086
			14.831	72.339	0.818822	0.870243			11.969	5.037	0.66081	0.0605954			16.227	35.014	0.895895	0.421221					13.406	67.119	1.02483	0.961938			144.065	2.791	11.0132	0.0400001			24.604	42.986	1.88087	0.616068				19.791	84.558	0.819233	0.656895			18.458	0.797
			16.473	76.828	0.909477	0.924246			11.405	7.79	0.629672	0.0937142			9.545	0.685	0.526981	0.00824059					12.072	58.202	0.922855	0.834141			167.337	4.81	12.7922	0.0689361			21.056	45.756	1.60964	0.655767				20.515	101.643	0.849202	0.789622			11.59	12.952
			19.695	93.127	1.08736	1.12032			14.489	3.123	0.79994	0.0375699			17.02	36.902	0.939677	0.443933					12.466	73.277	0.952975	1.05019			178.487	5.438	13.6446	0.0779365			21.071	35.052	1.61079	0.502359				16.3	78.402	0.674726	0.609072			10.058	10.624
			16.196	78.39	0.894184	0.943037			10.799	7.951	0.596215	0.0956511			20.382	58.713	1.12529	0.706321					13.4	66.596	1.02438	0.954443			169.642	8.367	12.9684	0.119914			19.842	36.951	1.51684	0.529576				19.98	102.676	0.827056	0.797647			11.352	0.589
			16.223	73.132	0.895674	0.879783			11.455	11.398	0.632432	0.137119			17.272	33.164	0.95359	0.398965					12.496	62.84	0.955268	0.900612			19.582	24.116	1.49696	0.345627			22.549	56.581	1.72378	0.81091				18.503	97.132	0.765917	0.754578			11.549	7.164
			19.288	72.541	1.06489	0.872673			11.115	6.656	0.613661	0.0800721			16.246	28.351	0.896944	0.341064					13.658	68.916	1.0441	0.987693			136.737	1.992	10.453	0.028549			18.17	24.784	1.38902	0.3552				13.289	53.6	0.550088	0.416396			22.771	0.579
			17.337	84.587	0.957179	1.01759			42.707	0.408	2.35786	0.00490827			17.236	36.245	0.951602	0.43603					14.679	65.425	1.12215	0.93766			213.46	3.616	16.3181	0.0518239			17.962	43.907	1.37312	0.629268				20.822	120.093	0.86191	0.932952			20.814	0.588
			13.548	64.549	0.747987	0.776529			12.488	4.779	0.689465	0.0574917			17.325	34.671	0.956516	0.417094					13.824	76.142	1.05679	1.09125			108.164	3.494	8.26869	0.0500754			22.816	45.622	1.74419	0.653847				15.479	92.817	0.640741	0.721056			15.302	0.554
			13.52	54.246	0.746441	0.652583			12.663	4.533	0.699126	0.0545323			17.668	37.832	0.975453	0.455121					14.68	66.464	1.12223	0.952551			141.404	2.234	10.8098	0.0320173			19.83	53.82	1.51592	0.771339				17.281	95.78	0.715333	0.744074			10.638	7.951
			19.794	98.467	1.09283	1.18456			10.411	2.422	0.574793	0.0291368			14.931	29.895	0.824343	0.359639					14.302	77.816	1.09333	1.11525			38.106	49.283	2.91305	0.706316			19.583	48.445	1.49704	0.694306				16.851	74.73	0.697534	0.580546			15.939	0.71
			18.914	86.836	1.04425	1.04464			12.055	2.167	0.665559	0.0260692			16.224	42.748	0.89573	0.514261					14.045	70.62	1.07368	1.01211			136.43	8.583	10.4295	0.12301			25.046	64.021	1.91466	0.917538				18.256	99.196	0.755693	0.770612			15.921	1.945
			21.146	103.168	1.16747	1.24112			24.406	5.137	1.34746	0.0617984			17.452	47.73	0.963528	0.574195					13.253	75.93	1.01314	1.08822			197.117	1.284	15.0688	0.0184021			24.404	62.719	1.86559	0.898878				19.434	100.856	0.804455	0.783508			13.406	13.843
			16.554	68.009	0.913949	0.818153			159.125	0.727	8.78532	0.00874586			17.561	55.143	0.969546	0.663374					12.583	67.348	0.961919	0.96522			90.459	1.435	6.91522	0.0205662			24.334	61.2	1.86023	0.877108				16.737	89.943	0.692815	0.698729			12.133	16.393
			16.053	72.786	0.886289	0.87562			17.816	5.269	0.983624	0.0633864			14.388	37.425	0.794364	0.450225					13.663	75.854	1.04448	1.08713			85.277	9.408	6.51908	0.134834			24.931	61.988	1.90587	0.888402				17.629	98.524	0.729739	0.765391			13.2	10.02
			16.538	85.31	0.913066	1.02628			13.068	3.389	0.721486	0.0407699			19.878	57.51	1.09747	0.691849					13.946	76.531	1.06611	1.09683			32.178	1.006	2.45988	0.0144178			25.053	68.232	1.9152	0.97789				18.04	97.036	0.746752	0.753832			16.33	0.792
			19.291	102.584	1.06506	1.23409			22.764	0.467	1.2568	0.00561804			14.127	20.302	0.779954	0.244234					12.79	61.081	0.977743	0.875403			33.093	4.386	2.52982	0.0628594			18.522	31.151	1.41593	0.446451				18.741	94.802	0.775769	0.736477			25.782	0.595
			15.013	69.741	0.82887	0.838989			11.121	6.736	0.613992	0.0810345			17.453	48.746	0.963583	0.586418					13.808	66.222	1.05557	0.949083			43.743	1.644	3.34397	0.0235615			23.355	58.136	1.78539	0.833196				18.978	101.091	0.785579	0.785333			27.72	0.93
			15.792	75.734	0.871879	0.911085			12.032	4.903	0.664289	0.0589834			19.861	72.737	1.09653	0.875031					14.864	76.056	1.13629	1.09002			135.977	1.579	10.3949	0.02263			22.101	48.525	1.68953	0.695452				20.412	94.626	0.844939	0.735109			20.688	0.513
			14.535	47.302	0.80248	0.569046			36.046	0.426	1.99011	0.00512481			4.684	0.579	0.258604	0.00696541					12.961	68.675	0.990815	0.984239			74.358	2.48	5.68436	0.0355429			23.073	45.3	1.76384	0.649232				19.356	105.067	0.801226	0.816221			15.186	0.775
			13.112	56.57	0.723916	0.680541			125.282	0.692	6.91684	0.00832481			12.858	26.644	0.709892	0.320529					13.4	67.017	1.02438	0.960477			85.355	2.726	6.52504	0.0390686			20.196	47.935	1.5439	0.686996				17.966	104.719	0.743689	0.813518			12.569	9.33
			13.73	51.134	0.758036	0.615145			14.689	6.556	0.810982	0.0788691			15.581	37.45	0.86023	0.450526					14.758	78.945	1.12819	1.13143			13.181	12.602	1.00763	0.18061			23.992	57.499	1.83409	0.824066				15.826	60.67	0.655105	0.47132			20.072	0.82
			23.108	107.007	1.2758	1.2873			131.456	0.576	7.25771	0.00692932			17.525	35.17	0.967558	0.423097					12.697	61.089	0.970634	0.875517			48.921	7.381	3.73981	0.105783			17.965	36.072	1.37335	0.516978				19.261	83.403	0.797294	0.647923			12.061	16.537
			16.579	86.747	0.915329	1.04357			136.849	0.776	7.55546	0.00933533			16.515	30.627	0.911796	0.368445					13.939	69.747	1.06558	0.999602			77.32	2.984	5.9108	0.0427662			24.363	47.313	1.86245	0.678082				18.797	85.061	0.778087	0.660803			17.776	0.718
			17.928	95.434	0.989808	1.14808			39.824	0.764	2.19869	0.00919097			15.735	31.119	0.868732	0.374364					14.343	77.834	1.09646	1.1155			88.158	9.37	6.73932	0.134289			25.073	52.518	1.91673	0.752679				16.717	84.463	0.691987	0.656157			14.537	9.777
			17.64	86.124	0.973907	1.03608			49.659	2.574	2.74168	0.0309654			19.128	51.143	1.05606	0.615254					13.318	68.073	1.01811	0.975611			28.199	1.624	2.1557	0.0232749			24.582	53.146	1.87919	0.76168				17.542	77.193	0.726137	0.59968			11.781	1.26
			20.617	102.902	1.13827	1.23792			46.161	1.065	2.54856	0.012812			13.881	36.156	0.766372	0.434959					12.552	67.477	0.959549	0.967069			27.056	9.482	2.06832	0.135894			25.012	76.728	1.91206	1.09965				22.133	129.002	0.916178	1.00216			12.426	21.248
			15.883	80.36	0.876903	0.966736			11.844	5.612	0.653909	0.0675127			19.77	65.06	1.0915	0.782676					12.888	68.046	0.985235	0.975224			60.444	15.036	4.6207	0.215493			16.989	32.511	1.29874	0.465942				17.331	71.801	0.717403	0.557792			10.147	19.293
			21.639	111.897	1.19469	1.34613			12.435	7.373	0.686538	0.0886977			19.215	53.5	1.06086	0.643609					15.149	76.506	1.15808	1.09647			222.463	3.664	17.0064	0.0525118			25.522	60.95	1.95105	0.873525				14.526	71.213	0.601292	0.553224			16.398	0.456
			16.972	83.467	0.937027	1.00411			10.724	10.119	0.592074	0.121732			20.903	61.43	1.15406	0.739007					13.571	69.462	1.03745	0.995518			240.717	3.178	18.4018	0.0455466			17.503	33.054	1.33803	0.473724				16.492	71.141	0.682673	0.552664			25.374	0.78
			20.315	82.962	1.12159	0.998038			12.028	8.889	0.664068	0.106935			18.222	61.244	1.00604	0.736769					12.658	60.096	0.967652	0.861286			127.553	4.007	9.7509	0.0574277			22.301	46.507	1.70482	0.666531				14.796	60.31	0.612469	0.468523			12.084	18.566
			18.584	96.613	1.02603	1.16226			12.894	4.436	0.71188	0.0533654			16.911	52.89	0.933659	0.63627					13.519	65.436	1.03347	0.937818			55.931	8.87	4.2757	0.127123			25.482	42.145	1.94799	0.604015				23.036	144.425	0.953557	1.12198			13.48	6.054
			21.064	110.917	1.16295	1.33434			32.808	0.406	1.81134	0.00488421			18.924	64.625	1.0448	0.777443					13.076	63.732	0.999607	0.913396			110.331	1.327	8.43435	0.0190183			23.954	41.988	1.83119	0.601765				19.237	102.01	0.796301	0.792473			13.888	10.719
			20.727	94.404	1.14434	1.13569			10.017	7.931	0.55304	0.0954105			10.818	21.151	0.597264	0.254448					12.473	62.065	0.95351	0.889505			29.901	7.091	2.28581	0.101627			24.078	55.188	1.84066	0.790945				18.131	94.874	0.750519	0.737036			25.319	0.766
			17.807	79.366	0.983127	0.954778			17.065	1.666	0.942161	0.0200421			15.331	58.577	0.846427	0.704685					12.488	57.098	0.954656	0.818319			25.147	17.537	1.92239	0.251337			22.837	44.208	1.7458	0.633582				14.492	79.573	0.599885	0.618169			12.338	9.475
			22.372	113.08	1.23516	1.36036			12.96	2.079	0.715524	0.0250105			19.487	48.255	1.07588	0.580511					13.894	76.572	1.06214	1.09742			20.13	11.802	1.53886	0.169144			17.551	36.104	1.3417	0.517437				17.621	88.21	0.729408	0.685266			28.247	0.868
			21.022	96.668	1.16063	1.16292			8.644	5.573	0.477237	0.0670436			16.258	44.519	0.897607	0.535566					14.733	66.868	1.12628	0.958341			9.133	1.441	0.69818	0.0206522			25.74	57.277	1.96772	0.820884				16.747	80.548	0.693229	0.625743			16.755	0.531
			21.093	109.556	1.16455	1.31797			45.159	0.607	2.49324	0.00730225			14.314	36.078	0.790278	0.434021					12.651	62.148	0.967117	0.890695			55.029	7.209	4.20674	0.103318			23.763	52.005	1.81658	0.745327				19.256	94.657	0.797087	0.73535			15.042	3.534
			18.313	102.575	1.01106	1.23398			7.798	8.685	0.430529	0.104481			17.805	39.837	0.983017	0.479242					12.793	69.49	0.977972	0.995919			70.783	2.104	5.41107	0.0301542			16.805	32.848	1.28467	0.470772				23.652	123.422	0.979056	0.958813			45.859	0.761
			20.649	114.435	1.14003	1.37666			10.21	2.698	0.563696	0.0324571			14.449	40.161	0.797732	0.483139					12.062	64.958	0.92209	0.930967			103.979	2.252	7.94877	0.0322753			20.957	40.388	1.60208	0.578834				16.836	89.964	0.696913	0.698892			16.735	0.583
			21.304	93.41	1.1762	1.12373			89.152	1.06	4.9221	0.0127519			15.618	47.455	0.862272	0.570887					14.428	73.958	1.10296	1.05995			138.19	1.353	10.5641	0.019391			19.45	41.593	1.48687	0.596104				17.157	77.35	0.710201	0.6009			12.015	7.827
			13.947	47.896	0.770016	0.576192			13.068	2.809	0.721486	0.0337925			17.507	46.94	0.966564	0.564691					13.194	65.464	1.00863	0.938219			121.036	2.52	9.25271	0.0361162			22.775	47.835	1.74106	0.685563				15.778	66.48	0.653118	0.516455			14.465	0.637
			13.3	54.318	0.734295	0.653449			52.086	0.48	2.87568	0.00577443			19.213	54.963	1.06075	0.661208					14.042	76.505	1.07345	1.09646			83.695	0.617	6.39814	0.00884274			22.611	50.446	1.72852	0.722984				18.203	99.666	0.753499	0.774263			36.223	0.877
			22.354	109.208	1.23417	1.31378			14.672	0.662	0.810044	0.0079639			15.141	39.881	0.835937	0.479771					12.654	61.167	0.967346	0.876635			91.786	3.374	7.01666	0.0483556			22.141	43.171	1.69259	0.61872				12.007	53.374	0.49702	0.41464			12.736	1.145
			17.698	85.828	0.977109	1.03252			10.961	2.178	0.605159	0.0262015			16.953	36.677	0.935978	0.441227					14.091	72.967	1.0772	1.04575			65.235	1.323	4.98695	0.018961			21.018	32.563	1.60674	0.466688				15.138	90.769	0.626626	0.705146			13.021	17.603
			16.865	79.836	0.931119	0.960432			29.6	0.418	1.63422	0.00502857			13.827	39.843	0.763391	0.479314					15.117	92.21	1.15563	1.32154			33.815	5.315	2.58502	0.0761737			22.084	45.07	1.68823	0.645936				17.486	77.049	0.723819	0.598561			15.332	11.318
			20.594	99.48	1.137	1.19675			17.719	0.897	0.978269	0.010791			19.803	49.155	1.09333	0.591338					13.419	76.301	1.02583	1.09353			84.71	0.615	6.47573	0.00881408			23.467	41.64	1.79396	0.596778				19.289	90.414	0.798453	0.702388			38.736	0.615
			21.658	110.102	1.19574	1.32453			12.61	4.518	0.6962	0.0543518			15.26	46.738	0.842507	0.562261					14.26	80	1.09012	1.14655			123.832	4.732	9.46645	0.0678182			23.312	47.253	1.78211	0.677222				19.752	108.902	0.817619	0.846014			12.049	0.439
			18.624	94.153	1.02823	1.13267			10.731	4.477	0.59246	0.0538586			14.362	34.613	0.792928	0.416397					11.847	58.995	0.905655	0.845507			201.697	1.407	15.4189	0.0201649			20.206	47.302	1.54467	0.677924				21.605	123.926	0.894322	0.962729			20.671	0.812
			17.719	86.836	0.978269	1.04464			11.373	4.979	0.627905	0.0598977			17.246	49.289	0.952154	0.59295					11.033	55.335	0.843428	0.793052			73.692	4.303	5.63345	0.0616699			23.298	46.497	1.78104	0.666387				19.51	119.986	0.807601	0.932121			16.964	3.288
			20.619	119.393	1.13838	1.43631			25.142	2.887	1.38809	0.0347308			15.683	38.085	0.865861	0.458165					13.011	66.695	0.994638	0.955862			25.09	10.474	1.91803	0.150112			22.199	57.36	1.69702	0.822074				21.245	114.006	0.87942	0.885664			13.521	11.002
			23.069	109.817	1.27364	1.32111			12.664	5.774	0.699182	0.0694616			15.493	42.259	0.855371	0.508379					14.025	75.097	1.07215	1.07628			30.108	14.538	2.30163	0.208356			21.429	38.588	1.63816	0.553037				19.64	105.49	0.812982	0.819507			23.5	0.54
			18.262	90.528	1.00825	1.08906			43.386	0.806	2.39535	0.00969623			15.898	38.863	0.877731	0.467524					14.072	78.962	1.07575	1.13167			126.1	1.734	9.63983	0.0248514			23.166	55.343	1.77095	0.793167				22.744	137.538	0.94147	1.06847			13.355	6.172
			23.979	117.717	1.32388	1.41614			12.324	0.665	0.68041	0.00799999			7.657	0.851	0.422744	0.0102376					12.947	67.23	0.989745	0.963529			34.97	8.487	2.67331	0.121634			20.833	40.996	1.5926	0.587548				19.919	122.248	0.824531	0.949693			25.049	1.188
			22.973	106.548	1.26834	1.28178			13.277	4.252	0.733025	0.0511518			15.531	37.11	0.857469	0.446436					12.687	78.52	0.969869	1.12534			28.315	26.779	2.16457	0.383792			22.978	65.337	1.75657	0.936399				18.695	109.319	0.773865	0.849253			8.296	1.035
			16.828	74.673	0.929077	0.898321			160.145	0.831	8.84163	0.00999698			17.976	52.319	0.992458	0.629401					12.618	70.56	0.964594	1.01125			154.531	3.997	11.8133	0.0572843			22.042	47.401	1.68502	0.679343				20.258	114.383	0.838564	0.888593			8.575	1.12
			21.901	103.887	1.20916	1.24977			28.006	0.433	1.54622	0.00520902			17.392	37.702	0.960215	0.453558					13.326	74.415	1.01872	1.0665			20.013	3.373	1.52991	0.0483413			19.836	47.633	1.51638	0.682668				22.794	120.349	0.94354	0.934941			19.666	0.673
			19.269	95.428	1.06384	1.14801			12.134	0.554	0.66992	0.00666466			17.078	48.168	0.942879	0.579464					12.185	67.781	0.931493	0.971426			58.034	0.886	4.43646	0.012698			21.549	48.499	1.64733	0.69508				19.377	96.11	0.802096	0.746638			43.653	0.891
			18.612	89.184	1.02757	1.07289			33.025	1.276	1.82332	0.0153504			15.869	37.746	0.87613	0.454087					14.278	82.305	1.09149	1.17958			214.353	2.713	16.3864	0.0388823			21.82	45.776	1.66805	0.656054				23.368	127.971	0.9673	0.994153			19.741	0.633
			19.696	102.462	1.08742	1.23262			10.074	7.294	0.556187	0.0877473			15.85	41.642	0.875081	0.500956					12.513	69.682	0.956568	0.998671			65.489	0.925	5.00637	0.0132569			22.998	48.474	1.7581	0.694721				21.455	122.484	0.888113	0.951526			15.062	5.956
			18.686	94.858	1.03166	1.14115			11.983	3.144	0.661583	0.0378225			17.333	27.917	0.956958	0.335843					13.988	71.123	1.06933	1.01932			109.799	3.702	8.39368	0.0530564			22.784	30.383	1.74174	0.435444				17.811	93.247	0.737272	0.724397			9.803	1.257
			19.63	101.165	1.08378	1.21702			121.134	2.186	6.68783	0.0262977			15.682	32.184	0.865806	0.387176					12.389	61.422	0.947088	0.88029			36.134	8.597	2.7623	0.123211			23.733	39.834	1.81429	0.570894				19.479	100.764	0.806318	0.782793			32.784	3.936
			18.796	91.222	1.03773	1.09741			16.54	3.751	0.913176	0.0451248			14.506	34.003	0.800879	0.409058					12.534	70.318	0.958173	1.00779			16.46	19.024	1.2583	0.272649			20.424	43.531	1.56133	0.623879				14.93	60.133	0.618016	0.467148			25.277	1.009
			20.039	95.254	1.10636	1.14591			74.89	0.558	4.13469	0.00671278			16.628	34.072	0.918035	0.409888					13.809	81.963	1.05564	1.17468			25.596	7.497	1.95671	0.107446			23.832	53.991	1.82186	0.77379				16.208	75.079	0.670917	0.583257			21.128	0.789
			16.828	70.347	0.929077	0.846279			12.415	3.745	0.685434	0.0450526			15.071	38.685	0.832072	0.465383					13.71	94.289	1.04807	1.35133			35.821	1.991	2.73837	0.0285347			22.994	56.578	1.7578	0.810867				16.47	81.752	0.681763	0.635097			18.193	0.763
			17.708	87.792	0.977662	1.05614			53.769	1.363	2.9686	0.016397			16.723	25.693	0.92328	0.309088					11.749	66.462	0.898163	0.952522			52.608	8.676	4.02167	0.124343			24.695	30.221	1.88783	0.433122				14.308	68.367	0.592268	0.531114			19.775	1.47
			19.096	90.316	1.05429	1.08651			31.947	0.742	1.7638	0.00892631			11.172	0.917	0.616808	0.0110316					11.602	72.786	0.886925	1.04316			39.697	5.177	3.03467	0.0741959			21.342	45.01	1.63151	0.645076				13.753	66.575	0.569295	0.517193			23.007	0.826
			13.238	48.732	0.730872	0.586249			12.186	6.107	0.672791	0.0734676			13.811	30.958	0.762508	0.372427					12.361	82.146	0.944948	1.1773			90.508	5.971	6.91897	0.0855754			21.457	44.039	1.6403	0.63116				17.007	98.299	0.703991	0.763643			20.881	0.637
			21.058	105.698	1.16262	1.27155			34.673	0.667	1.9143	0.00802405			15.653	29.065	0.864205	0.349654					15.937	99.459	1.21832	1.42543			121.239	3.095	9.26822	0.044357			24.692	32.012	1.8876	0.458791				16.265	67.253	0.673277	0.52246			25.991	1.143
			18.971	79.184	1.04739	0.952589			13.398	1.025	0.739706	0.0123308			11.919	30.554	0.65805	0.367567					8.603	38.96	0.657664	0.558368			71.401	4.245	5.45831	0.0608386			22.671	40.271	1.73311	0.577157				21.356	127.808	0.884015	0.992886			10.37	1.541
			23.157	112.666	1.2785	1.35538			14.057	2.712	0.776089	0.0326255			15.054	37.42	0.831134	0.450165					13.718	87.763	1.04868	1.2578			27.904	10.031	2.13315	0.143763			25.609	33.26	1.9577	0.476677				19.363	105.146	0.801516	0.816835			13.281	10.946
			21.527	108.425	1.18851	1.30436			73.453	1.571	4.05535	0.0188992			18.593	39.545	1.02652	0.475729					13.363	80.935	1.02155	1.15995			123.914	3.085	9.47272	0.0442137			21.486	25.456	1.64252	0.364831				19.889	115.657	0.82329	0.89849			68.481	0.923
			19.156	93.587	1.05761	1.12586			16.854	0.481	0.930512	0.00578646			15.278	38.994	0.843501	0.4691					11.026	68.918	0.842893	0.987721			59.855	6.256	4.57567	0.08966			22.252	39.331	1.70107	0.563685				15.622	67.041	0.64666	0.520813			45.713	0.982
			21.069	98.379	1.16322	1.18351			12.963	1.256	0.715689	0.0151098			10.917	17.121	0.602729	0.205967					11.171	64.201	0.853977	0.920118			104.192	2.144	7.96505	0.0307275			23.357	54.662	1.78555	0.783407				18.307	82.054	0.757804	0.637443			23.032	0.718
			24.559	115.804	1.35591	1.39313			76.713	0.588	4.23534	0.00707368			6.909	0.575	0.381447	0.00691729					16.332	102.851	1.24851	1.47404			33.104	5.286	2.53067	0.0757581			20.684	40.973	1.58121	0.587218				18.377	101.984	0.760702	0.792271			219.944	1.15
			18.484	92.482	1.0205	1.11256			19.62	0.433	1.08322	0.00520902			7.229	0.524	0.399114	0.00630375					13.038	85.161	0.996702	1.22051			22.514	0.769	1.7211	0.0110212			20.237	48.898	1.54704	0.700798				18.987	89.887	0.785952	0.698294			39.073	0.933
			24.613	134.629	1.35889	1.6196			43.285	1.054	2.38977	0.0126797			15.471	35.012	0.854156	0.421197					14.063	85.155	1.07506	1.22043			175.57	4.37	13.4216	0.0626301			22.109	56.435	1.69014	0.808817				17.658	102.201	0.730939	0.793956			11.358	1.927
			21.662	116.008	1.19596	1.39558			12.427	7.521	0.686097	0.0904781			16.874	37.38	0.931616	0.449684					16.225	68.261	1.24033	0.978305			36.761	6.104	2.81023	0.0874815			21.46	61.572	1.64053	0.88244				17.472	102.357	0.72324	0.795168			44.607	0.958
			17.297	79.488	0.95497	0.956246			10.746	0.511	0.593288	0.00614736			10.759	13.456	0.594006	0.161877					14.369	85.353	1.09845	1.22327			44.301	8.772	3.38663	0.125719			16.262	23.581	1.24316	0.337959				18.691	96.357	0.773699	0.748557			20.181	0.909
			16.747	81.148	0.924605	0.976216			9.414	3.186	0.519748	0.0383278			11.275	0.637	0.622495	0.00766315					12.009	72.842	0.918039	1.04396			23.044	8.323	1.76162	0.119284			22.089	52.964	1.68861	0.759071				17.71	81.052	0.733092	0.629659			48.95	0.733
			20.522	92.26	1.13302	1.10989			14.107	13.634	0.77885	0.164018			12.775	33.484	0.70531	0.402815					13.776	84.441	1.05312	1.21019			83.78	1.979	6.40464	0.0283627			22.047	50.769	1.6854	0.727613				19.489	92.257	0.806732	0.716706			21.68	1.268
			21.382	101.606	1.1805	1.22233			16.415	0.525	0.906275	0.00631578			12.427	31.279	0.686097	0.376288					17.759	96.507	1.3576	1.38312			38.123	0.508	2.91435	0.00728057			17.77	25.255	1.35844	0.36195				16.894	81.736	0.699314	0.634972			20.101	1.318
			18.182	85.387	1.00383	1.02721			17.532	0.913	0.967945	0.0109834			15.853	35.421	0.875247	0.426117					16.523	94.29	1.26312	1.35135			87.239	5.181	6.66906	0.0742532			20.523	41.743	1.5689	0.598254				16.988	78.517	0.703205	0.609965			26.373	1.373
			20.109	91.39	1.11022	1.09943			17.808	1.454	0.983183	0.0174917			15.924	41.477	0.879167	0.498971					14.92	88.083	1.14057	1.26239			91.054	5.97	6.96071	0.085561			21.845	38.73	1.66996	0.555072				19.503	106.872	0.807311	0.830243			13.439	2.201
			23.162	122.679	1.27878	1.47584			11.152	15.849	0.615704	0.190665			7.515	0.64	0.414904	0.00769924					13.922	87.797	1.06428	1.25829			162.572	1.237	12.428	0.0177285			17.797	25.104	1.36051	0.359786				20.928	110.416	0.866298	0.857775			18.244	1.231
			21.786	113.889	1.20281	1.37009			12.25	16.856	0.676325	0.202779			14.961	39.176	0.825999	0.47129					9.02	42.732	0.689542	0.612428			45.825	0.926	3.50313	0.0132713			16.651	24.307	1.2729	0.348364				20.526	116.287	0.849658	0.903385			9.49	1.321
			20.034	93.895	1.10608	1.12956			16.387	1.329	0.904729	0.015988			16.141	48.182	0.891147	0.579633					8.296	41.192	0.634195	0.590357			17.035	23.996	1.30226	0.343907			15.272	19.968	1.16748	0.286178				14.37	87.124	0.594835	0.67683			19.98	1.004
			24.474	116.99	1.35121	1.4074			16.872	0.476	0.931506	0.00572631			15.573	38.106	0.859788	0.458418					14.998	90.85	1.14654	1.30205			45.865	1.229	3.50619	0.0176138			18.826	31.589	1.43917	0.452728				15.443	64.144	0.639251	0.498308			35.11	0.836
			20.617	94.31	1.13827	1.13456			33.654	0.449	1.85804	0.0054015			6.64	17.28	0.366595	0.20788					12.465	72.913	0.952898	1.04498			36.834	1.006	2.81581	0.0144178			21.354	50.09	1.63243	0.717882				16.122	81.131	0.667358	0.630272			30.572	0.662
			18.336	80.42	1.01233	0.967458			12.025	2.5	0.663902	0.0300752			16.821	29.928	0.92869	0.360036					16.567	97.986	1.26648	1.40432			68.957	0.851	5.27148	0.0121964			22.145	61.408	1.69289	0.880089				17.329	94.242	0.71732	0.732126			15.182	6.31
			16.155	84.433	0.89192	1.01573			32.474	0.508	1.79289	0.00611127			17.972	41.772	0.992237	0.50252					12.864	75.483	0.9834	1.08181			22.564	5.904	1.72493	0.0846151			18.536	46.644	1.417	0.668494				15.01	60.321	0.621327	0.468608			22.888	1.225
			16.806	81.926	0.927862	0.985575			15.016	17.847	0.829036	0.214701			11.847	18.76	0.654075	0.225684					14.31	77.013	1.09394	1.10374			19.45	2.333	1.48687	0.0334362			19.215	36.46	1.46891	0.522539				16.524	93.634	0.683998	0.727403			21.399	0.653
			21.636	103.397	1.19453	1.24387			15.65	0.409	0.864039	0.0049203			11.694	18.91	0.645628	0.227489					15.372	87.812	1.17513	1.25851			36.184	6.254	2.76612	0.0896313			23.754	50.211	1.8159	0.719616				16.226	81.217	0.671663	0.630941			9.574	1.556
			24.673	119.655	1.3622	1.43946			13.388	11.055	0.739154	0.132992			18.635	44.03	1.02884	0.529684					15.832	92.545	1.21029	1.32634			34.834	1.73	2.66292	0.0247941			23.214	48.604	1.77462	0.696584				15.933	78.759	0.659534	0.611845			39.137	0.795
			20.62	116.861	1.13843	1.40585			12.457	3.066	0.687753	0.0368842			12.989	21.065	0.717125	0.253413					15.671	83.289	1.19798	1.19368			36.803	8.782	2.81344	0.125862			19.835	38.337	1.5163	0.54944				19.037	92.256	0.788022	0.716698			76.857	0.948
			19.486	91.881	1.07583	1.10533			13.166	3.85	0.726897	0.0463158			12.898	22.273	0.712101	0.267946					15.283	86.4	1.16832	1.23827			19.716	17.992	1.50721	0.257858			24.515	46.944	1.87407	0.672794				20.361	111.223	0.842828	0.864045			102.656	1.171
			17.657	84.865	0.974846	1.02093			21.77	3.403	1.20193	0.0409383			11.916	18.956	0.657884	0.228042					15.182	83.942	1.1606	1.20304			200.161	1.882	15.3015	0.0269725			26.907	67.96	2.05693	0.973991				18.369	91.66	0.76037	0.712068			13.369	4.363
			23.37	105.513	1.29026	1.26933			12.068	2.442	0.666276	0.0293774			16.317	39.018	0.900864	0.469389					14.931	84.333	1.14141	1.20865			24.87	1.08	1.90121	0.0154784			20.314	48.372	1.55292	0.693259				15.685	90.789	0.649268	0.705301			22.877	1.086
			22.271	106.45	1.22959	1.2806			21.813	3.24	1.2043	0.0389774			10.238	16.562	0.565242	0.199242					16.057	89.76	1.22749	1.28643			23.312	1.446	1.78211	0.0207238			18.59	40.323	1.42113	0.577903				16.756	90.6	0.693602	0.703833			17.92	1.215
			21.497	106.821	1.18685	1.28506			10.6	9.834	0.585228	0.118304			18.324	59.897	1.01167	0.720565					13.555	80.18	1.03622	1.14913			118.829	2.068	9.08399	0.0296382			16.01	20.705	1.2239	0.296741				15.99	92.047	0.661894	0.715074			25.544	0.738
			18.68	85.924	1.03133	1.03367			11.118	2.315	0.613827	0.0278496			14.986	26.62	0.82738	0.32024					15.617	96.064	1.19386	1.37677			10.856	0.898	0.829897	0.01287			20.058	48.98	1.53335	0.701973				19.598	109.224	0.811244	0.848515			12.397	0.611
			19.152	97.572	1.05739	1.1738			44.589	0.778	2.46177	0.00935939			15.503	35.329	0.855923	0.42501					16.199	96.869	1.23835	1.38831			21.72	1.859	1.66041	0.0266429			24.282	37.139	1.85626	0.53227				17.076	93.657	0.706848	0.727582			154.26	1.031
			20.547	105.073	1.1344	1.26404			14.969	0.988	0.826441	0.0118857			14.313	5.285	0.790223	0.0635789					16.001	90.71	1.22321	1.30004			87.331	2.106	6.6761	0.0301828			23.212	34.206	1.77446	0.490235				17.536	103.815	0.725889	0.806495			17.117	1.579
			22.168	97.425	1.2239	1.17203			27.209	0.644	1.50221	0.00774736			11.789	29.394	0.650873	0.353612					15.484	91.468	1.18369	1.3109			76.079	1.405	5.81593	0.0201362			19.695	39.071	1.5056	0.559959				18.203	95.644	0.753499	0.743018			70.806	1.342
			24.059	103.922	1.3283	1.25019			27.567	0.647	1.52198	0.00778345			16.021	37.779	0.884522	0.454484					16.409	101.928	1.2544	1.46082			22.57	1.085	1.72538	0.01555			16.686	32.305	1.27558	0.46299				15.206	46.96	0.62944	0.364812			20.896	0.768
			15.528	63.969	0.857303	0.769551			17.883	0.461	0.987323	0.00554586			14.521	28.527	0.801707	0.343182					15.77	81.989	1.20555	1.17505			200.388	2.472	15.3188	0.0354283			19.075	39.2	1.45821	0.561808				21.55	118.928	0.892045	0.923901			20.502	4.673
			19.824	90.95	1.09449	1.09413			29.238	0.508	1.61423	0.00611127			17.297	2.036	0.95497	0.0244932					16.527	92.596	1.26342	1.32707			16.032	0.873	1.22558	0.0125117			22.662	55.682	1.73242	0.798025				19.047	103.249	0.788436	0.802098			22.751	1.039
			21.004	98.498	1.15963	1.18494			31.335	0.621	1.73001	0.00747067			16.57	47.382	0.914832	0.570009					13.652	72.228	1.04364	1.03516			12.975	0.546	0.991886	0.00782518			17.467	30.872	1.33528	0.442452				17.148	87.948	0.709828	0.683231			22.603	1.845
			18.284	101.881	1.00946	1.22564			37.706	1.231	2.08175	0.014809			13.535	15.502	0.74727	0.18649					15.484	80.513	1.18369	1.1539			16.167	1.643	1.2359	0.0235472			5.686	4.843	0.434671	0.0694091				18.926	95.838	0.783427	0.744525			31.178	1.984
			18.111	81.274	0.999911	0.977732			10.459	8.055	0.577443	0.0969022			16.603	34.835	0.916654	0.419067					14.399	73.562	1.10074	1.05428			66.912	1.386	5.11515	0.0198639			23.491	54.991	1.79579	0.788122				18.957	105.629	0.78471	0.820587			22.843	3.568
			18.251	88.884	1.00764	1.06928			16.894	0.572	0.932721	0.0068812			15.34	33.999	0.846924	0.40901					15.344	82.897	1.17299	1.18807			15.988	0.852	1.22222	0.0122107			19.896	42.719	1.52097	0.612242				11.997	43.058	0.496606	0.334499			24.851	0.92
			16.943	79.354	0.935426	0.954634			16.455	0.715	0.908483	0.0086015			14.946	25.589	0.825171	0.307837					14.515	82.423	1.10961	1.18127			195.099	2.346	14.9145	0.0336225			17.036	29.94	1.30233	0.429095				15.389	67.443	0.637016	0.523936			31.443	0.773
			21.858	96.518	1.20678	1.16112			13.259	0.656	0.732032	0.00789172			13.528	30.71	0.746883	0.369443					14.231	75.951	1.0879	1.08852			7.357	0.7	0.562413	0.0100323			20.734	41.657	1.58503	0.597021				18.473	89.543	0.764675	0.695622			28.56	1.849
			23.363	100.594	1.28988	1.21015			145.468	0.658	8.03131	0.00791578			15.552	39.753	0.858628	0.478231					13.867	81.316	1.06008	1.16541			76.156	1.921	5.82181	0.0275315			24.792	45.799	1.89525	0.656384				16.967	93.601	0.702336	0.727147			43.603	1.063
			18.982	100.548	1.048	1.2096			46.898	7.226	2.58925	0.0869293			16.446	36.488	0.907986	0.438953					16.001	90.81	1.22321	1.30147			12.596	0.749	0.962913	0.0107345			19.773	49.009	1.51156	0.702389				15.638	60.95	0.647323	0.473495			13.813	3.17
			20.074	98.106	1.10829	1.18022			15.863	28.759	0.875799	0.345973			14.229	17.165	0.785585	0.206496					14.548	78.258	1.11213	1.12158			17.624	1.06	1.34728	0.0151917			25.685	46.322	1.96351	0.663879				19.515	115	0.807808	0.893386			25.149	1.56
			18.082	81.177	0.99831	0.976565			14.98	29.146	0.827048	0.350628			16.41	36.389	0.905999	0.437762					16.483	87.889	1.26006	1.25961			44.224	1.712	3.38074	0.0245361			18.793	40.204	1.43665	0.576197				18.097	106.98	0.749111	0.831082			18.704	1.088
			23.651	113.936	1.30578	1.37066			10.386	8.89	0.573413	0.106947			16.675	51.685	0.920629	0.621774					16.241	83.625	1.24156	1.1985			29.694	0.802	2.26998	0.0114941			24.305	65.147	1.85802	0.933676				20.905	128.156	0.865346	0.99559			16.513	1.648
			16.493	76.667	0.910581	0.922309			13.827	1.698	0.763391	0.0204271			16.6	56.15	0.916489	0.675488					12.195	66.878	0.932258	0.958484			60.011	2.447	4.5876	0.03507			20.263	36.03	1.54902	0.516376				14.446	83.94	0.597981	0.652094			118.254	1.403
			22.643	125.709	1.25012	1.51229			44.133	0.797	2.43659	0.00958796			13.177	9.008	0.727504	0.108367					13.373	73.32	1.02231	1.05081			14.574	1.007	1.11412	0.0144322			19.293	33.979	1.47487	0.486981				10.659	42.5	0.441221	0.330165			22.26	1.038
			18.548	80.237	1.02404	0.965256			136.507	0.895	7.53657	0.0107669											18.349	98.619	1.40271	1.41339			111.106	0.872	8.4936	0.0124974			19.482	35.163	1.48932	0.50395				17.54	97.919	0.726055	0.760691			22.338	4.127
			17.375	78.963	0.959277	0.94993			9.287	0.731	0.512737	0.00879398											8.681	38.915	0.663627	0.557723			109.512	0.724	8.37174	0.0103762			20.257	41.99	1.54856	0.601794				21.349	119.27	0.883725	0.926558			17.027	1.118
			20.257	93.563	1.11839	1.12557			26.2	0.652	1.44651	0.0078436											14.939	83.747	1.14203	1.20025			16.728	0.811	1.27879	0.0116231			24.666	48.395	1.88561	0.693589				21.516	142.254	0.890638	1.10511			20.326	1.692
			20.485	113.192	1.13098	1.36171			81.722	1.07	4.51189	0.0128722											14.358	77.451	1.09761	1.11001			16.194	1.31	1.23796	0.0187747			16.478	23.474	1.25968	0.336425				17.203	68.823	0.712105	0.534657			15.472	2.894
			21.05	94.75	1.16217	1.13985			7.48	1.391	0.412972	0.0167338											15.068	89.449	1.15189	1.28197			12.186	15.729	0.93157	0.225425			22.686	50.721	1.73425	0.726925				19.901	114.835	0.823786	0.892105			15.333	1.565
			23.122	109.191	1.27657	1.31357			26.193	0.969	1.44612	0.0116571											8.505	38.029	0.650172	0.545025			26.395	0.657	2.01779	0.00941602			24.017	64.564	1.836	0.925321				18.688	101.745	0.773575	0.790414			22.557	1.186
			17.744	86.065	0.979649	1.03537			134.613	0.875	7.43201	0.0105263											16.139	97.916	1.23376	1.40332			45.362	0.901	3.46774	0.012913			18.117	31.179	1.38497	0.446852				15.155	93.916	0.627329	0.729594			22.858	1.097
			16.279	79.527	0.898766	0.956715			11.925	2.386	0.658381	0.0287037											12.362	65.781	0.945024	0.942762			81.198	1.477	6.20725	0.0211681			22.685	51.845	1.73418	0.743034				19.758	102.374	0.817867	0.7953			16.852	0.979
			20.049	90.411	1.10691	1.08765			77.663	0.596	4.28779	0.00716992											14.569	79.048	1.11374	1.1329			144.606	1.752	11.0545	0.0251094			16.629	21.608	1.27122	0.309682				19.094	102.364	0.790381	0.795223			23.449	0.954
			17.892	76.394	0.98782	0.919025			71.997	0.647	3.97497	0.00778345											16.693	90.142	1.27611	1.2919			35.527	0.716	2.71589	0.0102616			21.43	41.594	1.63824	0.596118				13.19	70.243	0.54599	0.545688			15.279	3.152
			18.668	85.326	1.03066	1.02648			13.2	1.784	0.728774	0.0214616											14.518	77.999	1.10984	1.11787			87.335	1.168	6.6764	0.0167396			19.047	36.671	1.45607	0.525563				15.889	75.254	0.657713	0.584617			26.986	2
			13.28	54.527	0.733191	0.655963			25.348	4.487	1.39947	0.0539789											14.773	76.574	1.12934	1.09745			50.548	0.706	3.86419	0.0101183			21.606	52.035	1.65169	0.745757				17.877	88.548	0.740004	0.687892			124.084	1.43
			20.543	90.563	1.13418	1.08948			11.41	2.266	0.629948	0.0272601											14.728	92.634	1.1259	1.32762			97.397	1.404	7.4456	0.0201219			23.334	59.081	1.78379	0.846739				19.612	117.628	0.811823	0.913802			35.073	1.634
			21.428	92.493	1.18304	1.1127			22.299	0.713	1.23113	0.00857744											15.156	77.265	1.15861	1.10735			138.615	1.377	10.5965	0.0197349			24.96	37.452	1.90809	0.536756				15.43	76.085	0.638713	0.591072			46.698	1.698
			21.952	111.262	1.21197	1.33849			180.401	0.716	9.95997	0.00861353											16.375	90.696	1.2518	1.29984			62.877	1.032	4.80669	0.0147905			18.266	36.109	1.39636	0.517508				14.097	70.582	0.583534	0.548322			20.739	1.378
			14.86	70.868	0.820423	0.852547			18.889	3.794	1.04286	0.0456421											13.944	72.098	1.06596	1.0333			52.857	0.778	4.0407	0.0111502			25.798	79.323	1.97215	1.13684				20.984	119.597	0.868616	0.929099			53.446	0.915
			17.473	70.823	0.964687	0.852005			20.744	0.966	1.14528	0.011621											14.474	75.62	1.10648	1.08377			103.854	1.701	7.93921	0.0243784			22.289	52.768	1.7039	0.756262				13.633	63.749	0.564327	0.495239			23.893	1.094
			19.614	99.473	1.08289	1.19667			35.312	0.903	1.94958	0.0108631											13.741	79.671	1.05044	1.14183			172.596	4.79	13.1943	0.0686495			24.762	76.734	1.89295	1.09974				15.33	70.107	0.634573	0.544632			23.146	3.336
			18.847	75.845	1.04055	0.91242			38.175	0.499	2.10765	0.006003											13.302	60.828	1.01688	0.871777			73.839	1.664	5.64469	0.0238482			20.247	52.181	1.5478	0.747849				17.218	101.283	0.712726	0.786825			24.626	1.126
			16.956	75.181	0.936144	0.904432			20.943	0.401	1.15627	0.00482406											16.15	93.876	1.2346	1.34542			34.675	0.974	2.65076	0.0139592			22.362	37.407	1.70948	0.536111				17.974	107.916	0.74402	0.838354			18.261	1.566
			21.973	101.947	1.21313	1.22643			152.121	0.743	8.39863	0.00893834											12.503	62.055	0.955803	0.889362			33.003	0.808	2.52294	0.0115801			23.168	64.656	1.7711	0.926639				14.761	77.352	0.61102	0.600915			23.594	2.581
			16.81	73.465	0.928083	0.883789			31.718	0.732	1.75116	0.00880601											15.73	90.409	1.20249	1.29573			106.912	1.018	8.17298	0.0145898			24.103	46.513	1.84258	0.666617				17.656	72.224	0.730856	0.561078			15.95	1.589
			21.226	110.944	1.17189	1.33466			12.391	2.53	0.684109	0.0304361											12.971	65.792	0.99158	0.94292			19.826	1.71	1.51562	0.0245074			21.585	56.072	1.65008	0.803615				16.511	103.107	0.68346	0.800995			49.258	0.815
			22.858	115.76	1.26199	1.3926			35.839	0.525	1.97868	0.00631578											14.282	72.838	1.0918	1.0439			19.534	4.836	1.49329	0.0693087			24.668	36.92	1.88577	0.529131				21.628	123.817	0.895274	0.961882			25.383	1.143
			24.89	113.494	1.37418	1.36534			69.5	0.685	3.83711	0.00824059											14.087	73.436	1.07689	1.05247			78.816	2.946	6.02516	0.0422216			22.483	49.763	1.71873	0.713195				13.627	67.777	0.564079	0.526531			33.434	1.609
			17.988	71.59	0.99312	0.861232			24.445	4.409	1.34961	0.0530406											13.611	79.98	1.04051	1.14626			66.126	1.297	5.05506	0.0185884			20.825	42.537	1.59199	0.609633				14.876	74.421	0.61578	0.578145			64.56	1.472
			19.121	97.549	1.05567	1.17352			37.038	0.846	2.04487	0.0101774											13.275	60.855	1.01482	0.872164			20.86	10.988	1.59466	0.157478			24.475	53.209	1.87101	0.762583				19.304	116.489	0.799074	0.904954			15.903	2.748
			22.346	97.107	1.23373	1.1682			37.927	1.5	2.09396	0.0180451											12.73	64.467	0.973156	0.92393			54.727	1.009	4.18365	0.0144608			22.053	39.872	1.68586	0.571439				16.303	59.79	0.67485	0.464483			40.2	0.865
			19.634	90.934	1.084	1.09394			65.133	0.943	3.596	0.0113444											11.414	47.164	0.872554	0.675947			103.112	2.429	7.88249	0.034812			22.874	51.583	1.74862	0.739279				10.278	48.709	0.42545	0.3784			36.493	1.456
			22.234	117.62	1.22754	1.41498			65.244	7.023	3.60213	0.0844872											15.043	77.618	1.14998	1.11241			111.738	1.077	8.54191	0.0154354			23.105	53.286	1.76628	0.763686				20.279	95.545	0.839433	0.742249			27.588	1.184
			16.19	75.502	0.893853	0.908294			24.291	1.302	1.34111	0.0156631											13.678	74.456	1.04563	1.06709			191.012	1.927	14.6021	0.0276174			16.639	33.739	1.27198	0.483542				17.902	101.151	0.741039	0.785799			30.668	0.796
			19.796	82.759	1.09294	0.995596			78.37	0.636	4.32682	0.00765112											12.272	62.74	0.938144	0.899179			53.624	2.36	4.09934	0.0338231			17.555	33.302	1.34201	0.477279				18.91	116.808	0.782765	0.907432			22.282	1.131
			12.663	50.78	0.699126	0.610887			72.396	0.7	3.997	0.00842105											12.059	62.557	0.921861	0.896557			107.903	0.903	8.24874	0.0129416			19.841	45.533	1.51676	0.652571				20.698	109.128	0.856778	0.847769			23.222	1.905
			18.589	85.402	1.0263	1.02739			87.378	0.637	4.82415	0.00766315											16.139	92.295	1.23376	1.32276			196.466	2.126	15.019	0.0304695			21.853	38.133	1.67057	0.546516				14.555	81.057	0.602493	0.629698			56.601	1.009
			17.377	70.549	0.959387	0.848709			82.825	0.639	4.57278	0.00768721											15.018	83.131	1.14806	1.19142			17.875	2.923	1.36647	0.041892			19.571	38.457	1.49612	0.551159				15.69	75.401	0.649475	0.585759			126.174	1.565
			22.067	105.514	1.21832	1.26934			19.534	0.733	1.07848	0.00881804											13.482	68.992	1.03064	0.988782			97.744	1.935	7.47213	0.0277321			18.691	32.732	1.42885	0.46911				15.922	86.034	0.659079	0.668362			33.901	1.004
			21.107	92.414	1.16532	1.11175			132.528	8.245	7.31689	0.0991879											11.733	58.477	0.89694	0.838083			146.181	1.694	11.1749	0.0242781			19.476	17.009	1.48886	0.24377				18.216	94.326	0.754037	0.732779			103.424	1.223
			20.776	107.175	1.14705	1.28932			12.654	2.935	0.698629	0.0353082											14.942	70.401	1.14225	1.00898			192.608	1.238	14.7241	0.0177428			23.973	46.342	1.83264	0.664166				16.458	87.919	0.681266	0.683006			20.296	1.303
			17.028	78.207	0.940119	0.940835			16.454	0.63	0.908428	0.00757894											15.719	88.705	1.20165	1.27131			156.365	1.824	11.9535	0.0261413			18.865	16.393	1.44215	0.234942				22.929	147.315	0.949128	1.14443			25.885	1.466
			21.315	99.775	1.1768	1.2003			24.343	0.431	1.34398	0.00518496											14.83	72.472	1.13369	1.03866			42.596	0.613	3.25629	0.00878541			18.669	42.086	1.42717	0.60317				25.768	141.6	1.06665	1.10003			19.995	0.828
			21.397	102.249	1.18133	1.23006			11.913	2.955	0.657719	0.0355488											16.376	83.679	1.25188	1.19927			44.284	1.015	3.38533	0.0145468			24.81	64.134	1.89662	0.919158				18.148	109.655	0.751222	0.851863			33.432	0.868
			16.36	81.177	0.903238	0.976565			60.05	0.749	3.31537	0.00901052											14.305	69.983	1.09356	1.00298			73.149	1.459	5.59194	0.0209101			25.303	60.837	1.93431	0.871906				24.569	166.582	1.01701	1.29411			22.431	1.079
			21.723	96.051	1.19933	1.1555			24.815	0.903	1.37004	0.0108631											15.072	76.872	1.15219	1.10172			66.436	1.264	5.07876	0.0181154			14.236	38.756	1.08828	0.555445				20.51	129.338	0.848995	1.00477			25.923	1.261
			21.861	112.342	1.20695	1.35148			12.168	13.911	0.671797	0.16735											12.125	67.654	0.926907	0.969606			26.466	1.281	2.02322	0.0183591			16.313	46.021	1.24706	0.659565				26.59	154.812	1.10067	1.20267			32.242	0.656
			15.545	72.199	0.858242	0.868559			139.808	0.804	7.71882	0.00967217											11.318	49.626	0.865215	0.711232			27.504	1.658	2.10257	0.0237622			19.998	32.289	1.52877	0.462761				20.044	150.869	0.829706	1.17204			38.803	1.021
			16.698	87.509	0.921899	1.05274			34.213	0.607	1.88891	0.00730225											11.944	53.471	0.91307	0.766338			39.374	1.416	3.00998	0.0202939			20.373	50.708	1.55743	0.726739				23.852	153.319	0.987335	1.19107			22.31	0.63
			15.02	61.908	0.829257	0.744757			106.365	1.417	5.87243	0.0170466											13.101	68.921	1.00152	0.987764			63.927	0.871	4.88696	0.012483			22.687	54.361	1.73433	0.779093				21.028	129.385	0.870438	1.00514			31.945	3.087
			19.342	96.061	1.06787	1.15562			200.745	0.974	11.0832	0.0117173											14.887	77.485	1.13805	1.1105			52.99	1.327	4.05087	0.0190183			17.042	36.61	1.30279	0.524688				23.8	142.63	0.985182	1.10803			60.692	0.859
			21.762	97.835	1.20148	1.17696			24.044	1.515	1.32747	0.0182255											14.211	78.642	1.08637	1.12708			45.323	0.633	3.46476	0.00907205			19.491	47.175	1.49001	0.676104				21.432	145.467	0.887161	1.13007			27.709	1.332
			17.756	84.141	0.980312	1.01222			39.632	1.084	2.18809	0.0130406											13.069	72.667	0.999072	1.04145			169.029	1.428	12.9216	0.0204659			21.63	50.187	1.65352	0.719272				22.258	134.744	0.921353	1.04677			22.477	2.555
			24.798	114.517	1.3691	1.37765			58.134	0.383	3.20959	0.00460752											13.93	73.838	1.06489	1.05823			43.487	0.719	3.3244	0.0103046			18.501	26.538	1.41433	0.380338				18.413	128.602	0.762192	0.999055			36.177	1.159
			19.199	95.192	1.05998	1.14517			11.809	11.07	0.651977	0.133173											15.63	83.32	1.19485	1.19413			34.078	1.536	2.60512	0.0220137			24.049	61.733	1.83845	0.884747				20.031	140.415	0.829168	1.09082			56.001	1.78
			20.359	99.771	1.12402	1.20025			60.013	0.802	3.31333	0.00964811											13.854	74.748	1.05908	1.07128			15.78	1.583	1.20632	0.0226873			19.175	40.22	1.46585	0.576426				24.9	163.372	1.03072	1.26917			146.839	0.952
			19.741	102.858	1.0899	1.23739			99.261	11.32	5.48022	0.13618											12.915	70.905	0.987299	1.0162			16.211	0.976	1.23926	0.0139879			24.581	59.885	1.87912	0.858262				21.49	114.058	0.889562	0.886068			25.07	1.143
			20.87	94.825	1.15224	1.14075			27.984	0.959	1.545	0.0115368											12.02	55.701	0.91888	0.798297			28.982	1.719	2.21556	0.0246364			20.324	34.153	1.55369	0.489475				22.952	110.383	0.95008	0.857519			69.685	1.169
			16.893	71.818	0.932665	0.863975			24.573	0.733	1.35668	0.00881804											12.187	53.212	0.931646	0.762626			93.091	2.698	7.11643	0.0386673			23.565	58.932	1.80145	0.844604				22.837	139.203	0.94532	1.08141			17.889	3.789
			14.861	71.543	0.820478	0.860667			41.671	0.539	2.30066	0.00648421											13.222	63.188	1.01077	0.9056			135.261	1.349	10.3401	0.0193336			20.293	54.201	1.55132	0.7768				23.249	148.435	0.962374	1.15313			47.725	1.547
			18.607	90.663	1.0273	1.09068			64.014	0.725	3.53422	0.0087218											13.123	64.338	1.0032	0.922082			15.347	3.267	1.17322	0.0468221			23.307	68.969	1.78172	0.988452				22.912	125.104	0.948424	0.97188			13.247	1.656
			18.976	90.619	1.04767	1.09015			32.804	0.927	1.81111	0.0111519											11.466	58.264	0.876529	0.83503			61.225	2.154	4.6804	0.0308708			19.23	64.269	1.47005	0.921093				21.149	119.811	0.875446	0.930761			78.637	1.842
			19.867	84.783	1.09686	1.01995			23.089	0.723	1.27475	0.00869774											13.493	72.105	1.03148	1.0334			63.184	0.652	4.83016	0.00934436			20.291	48.832	1.55116	0.699852				21.485	134.35	0.889355	1.04371			119.306	1.728
			16.932	77.031	0.934819	0.926688			26.922	1.651	1.48637	0.0198616											12.718	61.378	0.972239	0.879659			20.885	3.259	1.59657	0.0467074			12.579	1.605	0.961613	0.0230026				22.366	146.256	0.925823	1.1362			44.733	1.508
			18.072	88.323	0.997758	1.06253			27.921	0.735	1.54152	0.0088421											14.138	76.772	1.08079	1.10028			28.424	0.994	2.1729	0.0142458			20.224	54.246	1.54604	0.777445				15.994	96.402	0.662059	0.748906			27.364	1.219
			15.405	58.845	0.850513	0.707909			62.767	0.654	3.46538	0.00786766											12.544	64.74	0.958937	0.927843			61.425	0.668	4.69569	0.00957367			23.375	67.002	1.78692	0.960262				18.958	108.743	0.784752	0.844778			19.019	2.114
			19.791	88.715	1.09266	1.06725			25.264	0.798	1.39483	0.00959999											11.858	61.888	0.906496	0.886969			25.941	1.512	1.98308	0.0216697			19.853	27.477	1.51768	0.393796				21.404	102.07	0.886002	0.792939			14.564	1.089
			16.655	76.395	0.919525	0.919037			10.218	9.725	0.564137	0.116992											13.632	69.881	1.04211	1.00152			61.145	1.159	4.67428	0.0166106			22.882	56.117	1.74924	0.80426				26.274	165.91	1.08759	1.28888			30.199	1.475
			17.574	79.045	0.970263	0.950917			11.243	11.866	0.620728	0.142749											13.564	66.513	1.03691	0.953253			91.438	2.441	6.99006	0.034984			22.815	50.193	1.74411	0.719358				26.623	157.379	1.10204	1.22261			20.976	1.45
			22.702	108.76	1.25338	1.30839			30.608	0.579	1.68987	0.00696541											13.315	65.099	1.01788	0.932988			70.857	1.396	5.41673	0.0200072			22.255	68.242	1.7013	0.978033				23.368	137.362	0.9673	1.06711			39.649	1.405
			21.195	92.511	1.17018	1.11291			17.894	1.265	0.987931	0.015218											13.073	71.393	0.999377	1.02319			43.43	1.474	3.32005	0.0211251			21.57	57.713	1.64894	0.827133				22.784	152.241	0.943126	1.1827			31.27	0.906
			20.211	94.374	1.11585	1.13533			69.738	0.915	3.85025	0.0110075											12.429	61.411	0.950146	0.880132			29.297	0.832	2.23964	0.0119241			20.948	53.38	1.60139	0.765033				25.276	138.318	1.04628	1.07453			53.048	0.837
			18.029	87.028	0.995384	1.04695			18.903	1.364	1.04364	0.016409											12.921	69.839	0.987758	1.00092			22.341	1.322	1.70788	0.0189467			23.102	58.033	1.76605	0.831719				23.326	137.894	0.965562	1.07124			63.478	0.854
			19.843	93.166	1.09554	1.12079			17.155	0.507	0.94713	0.00609924											14.666	68.699	1.12116	0.984583			24.426	0.673	1.86727	0.00964532			18.945	29.478	1.44827	0.422474				20.484	111.724	0.847919	0.867937			25.759	1.791
			18.651	90.077	1.02972	1.08363			24.802	0.485	1.36932	0.00583458											12.537	62.564	0.958402	0.896657			17.355	0.885	1.32672	0.0126837			19.67	45.538	1.50369	0.652643				24.553	153.349	1.01635	1.1913			14.319	1.66
			20.224	103.589	1.11657	1.24618			8.515	8.869	0.470115	0.106695											12.8	71.418	0.978508	1.02355			26.81	1.246	2.04951	0.0178575			19.816	30.121	1.51485	0.431689				26.925	158.822	1.11454	1.23382			125.55	1.162
			20.447	92.173	1.12888	1.10885			21.709	1.399	1.19856	0.0168301											12.027	68.021	0.919415	0.974866			150.275	3.423	11.4879	0.0490579			17.213	40.242	1.31586	0.576742				28.063	149.148	1.16165	1.15867			123.345	1.436
			21.998	113.095	1.21451	1.36054			62.71	0.57	3.46223	0.00685714											13.158	65.988	1.00588	0.945729			85.237	1.292	6.51602	0.0185167			19.021	52.723	1.45408	0.755617				28.315	167.885	1.17208	1.30423			31.624	7.107
			15.574	71.847	0.859843	0.864324			21.12	0.752	1.16604	0.00904661											15.924	93.82	1.21732	1.34461			89.162	2.204	6.81607	0.0315874			22.839	66.285	1.74595	0.949986				20.408	109.944	0.844773	0.854109			23.296	1.999
			21.224	103.221	1.17178	1.24176			34.1	8.782	1.88267	0.105648											14.196	80.459	1.08523	1.15313			127.349	1.409	9.73531	0.0201936			21.029	59.925	1.60758	0.858835				24.873	133.208	1.0296	1.03484			32.2	1.553
			21.18	108.323	1.16935	1.30313			28.603	0.693	1.57918	0.00833684											8.558	37.352	0.654224	0.535323			88.341	0.889	6.75331	0.012741			24.53	39.77	1.87522	0.569977				25.291	171.415	1.0469	1.33165			24.558	1.506
			19.715	83.494	1.08847	1.00444			41.343	0.98	2.28255	0.0117895											15.346	93.65	1.17314	1.34218			104.618	1.514	7.99762	0.0216984			19.1	47.577	1.46012	0.681866				24.857	150.581	1.02894	1.1698			27.451	1.458
			17.442	50.232	0.962976	0.604294			17.162	0.68	0.947517	0.00818044											16.825	93.333	1.2862	1.33763			129.813	1.777	9.92367	0.0254677			21.867	49.641	1.67164	0.711447				20.897	119.635	0.865015	0.929394			38.872	1.357
			16.485	75.931	0.91014	0.913455			22.089	0.432	1.21954	0.00519699											15.064	87.836	1.15158	1.25885			30.854	1.605	2.35866	0.0230026			19.949	38.433	1.52502	0.550815				22.752	127.216	0.941801	0.988287			23.01	2.322
			14.959	61.329	0.825889	0.737792			152.01	0.725	8.3925	0.0087218											15.241	91.605	1.16511	1.31287			126.591	1.005	9.67736	0.0144035			19.974	48.062	1.52693	0.688817				23.304	141.181	0.964651	1.09678			28.129	0.995
			17.494	90.876	0.965847	1.09324			171.824	0.594	9.48643	0.00714586											14.82	79.196	1.13293	1.13502			92.421	0.849	7.06521	0.0121677			25.703	77.143	1.96489	1.1056				22.018	120.367	0.911418	0.93508			12.106	6.91
			19.539	94.014	1.07875	1.13099			39.269	3.551	2.16805	0.0427188											14.462	85.335	1.10556	1.22301			32.334	0.779	2.4718	0.0111645			10.291	0.796	0.786705	0.0114081				23.445	135.615	0.970487	1.05354			22.864	6.474
			19.168	83.758	1.05827	1.00761			14.751	0.513	0.814405	0.00617142											14.982	79.422	1.14531	1.13826			153.553	1.747	11.7385	0.0250377			25.779	51.392	1.9707	0.736542				25.321	154.302	1.04814	1.19871			22.212	1.243
			16.625	76.264	0.917869	0.917461			17.123	0.794	0.945364	0.00955187											14.263	78.34	1.09035	1.12276			115.214	1.044	8.80764	0.0149624			25.122	45.196	1.92047	0.647742				27.793	175.23	1.15047	1.36129			32.884	1.15
			15.962	63.928	0.881265	0.769058			15.733	0.794	0.868622	0.00955187											15.194	83.589	1.16152	1.19798			20.597	1.551	1.57456	0.0222287			19.101	44.973	1.46019	0.644546				23.143	145.608	0.957986	1.13117			22.243	0.782
			21.217	102.666	1.17139	1.23508			30.944	6.839	1.70842	0.0822736											15.792	81.573	1.20723	1.16909			33.536	3.774	2.56369	0.0540883			21.355	43.481	1.6325	0.623162				19.431	120.301	0.804331	0.934568			36.128	0.806
			18.266	86.625	1.00847	1.0421			28.449	0.965	1.57067	0.011609											13.841	76.95	1.05809	1.10283			23.5	0.67	1.79648	0.00960233			12.37	1.097	0.945636	0.015722				23.165	148.951	0.958897	1.15714			15.81	1.792
			19.591	98.359	1.08162	1.18327			37.979	1.907	2.09683	0.0229413											13.539	67.963	1.035	0.974034			25	1.513	1.91115	0.0216841			21.173	45.567	1.61859	0.653059				27.202	161.462	1.12601	1.25433			54.915	1.305
			19.608	98.163	1.08256	1.18091			34.616	0.771	1.91116	0.00927518											14.976	77.839	1.14485	1.11558			42.642	0.777	3.25981	0.0111358			25.518	60.133	1.95075	0.861816				23.202	141.429	0.960429	1.0987			20.647	1.616
			18.232	87.439	1.00659	1.0519			29.641	1.498	1.63648	0.018021											15.714	85.815	1.20127	1.22989			9.238	6.698	0.706207	0.0959946			23.665	64.129	1.80909	0.919086				21.563	117.374	0.892584	0.911829			50.357	1.191
			20.195	99.777	1.11497	1.20032			32.658	0.706	1.80305	0.00849323											15.5	82.923	1.18491	1.18844			93.663	1.253	7.16015	0.0179578			19.746	44.243	1.5095	0.634083				22.885	138.959	0.947307	1.07951			12.365	1.029
			16.56	81.841	0.91428	0.984553			24.479	1.388	1.35149	0.0166977											15.265	81.221	1.16695	1.16405			30.444	1.083	2.32732	0.0155214			23.186	60.139	1.77247	0.861902				25.513	162.028	1.05609	1.25873			26.293	7.704
			17.224	82.061	0.95094	0.987199			24.022	12.087	1.32626	0.145407											16.875	89.137	1.29002	1.2775			103.803	2.588	7.93531	0.0370908			23.341	41.827	1.78432	0.599458				20.438	141.066	0.846015	1.09588			168.366	1.83
			19.236	99.838	1.06202	1.20106			45.388	1.031	2.50588	0.012403											13.534	72.682	1.03462	1.04167			56.166	0.714	4.29366	0.0102329			22.357	54.065	1.7091	0.774851				28.785	189.178	1.19153	1.46964			88.968	0.922
			17.025	75.983	0.939953	0.91408			14.926	0.745	0.824067	0.0089624											9.468	46.303	0.72379	0.663607			93.322	0.975	7.13408	0.0139735			17.374	25.589	1.32817	0.366737				25.067	153.483	1.03763	1.19234			34.093	2.485
			15.206	72.862	0.839526	0.876535			11.288	11.031	0.623212	0.132704											14.466	76.831	1.10587	1.10113			56.116	2.096	4.28984	0.0300395			22.913	59.435	1.7516	0.851813				23.465	134.341	0.971315	1.04364			27.242	1.305
			19.495	92.589	1.07632	1.11385			98.897	2.789	5.46012	0.0335519											16.249	90.355	1.24217	1.29495			80.394	1.585	6.14579	0.022716			21.109	56.042	1.6137	0.803185				24.845	115.043	1.02844	0.893721			17.868	11.259
			20.663	97.242	1.14081	1.16983			25.405	0.68	1.40261	0.00818044											15.806	88.012	1.2083	1.26137			99.595	1.606	7.61363	0.0230169			23.461	53.055	1.7935	0.760375				28.05	163.081	1.16111	1.26691			229.575	1.258
			19.458	86.938	1.07428	1.04587			22.652	0.699	1.25062	0.00840902											16.93	90.778	1.29423	1.30102			78.88	1.759	6.03005	0.0252097			20.996	46.963	1.60506	0.673066				20.634	119.884	0.854128	0.931328			50.279	1.448
			16.584	79.075	0.915605	0.951277			13.503	0.477	0.745503	0.00573834											13.484	64.234	1.0308	0.920591			55.383	1.777	4.2338	0.0254677			16.801	30.707	1.28437	0.440088				24.226	140.726	1.00282	1.09324			81.345	0.988
			18.219	79.247	1.00587	0.953347			29.508	0.582	1.62914	0.0070015											14.351	75.292	1.09708	1.07907			111.299	1.125	8.50835	0.0161233			22.876	60.778	1.74878	0.87106				26.107	128.877	1.08068	1.00119			21.778	9.293
			15.542	70.308	0.858076	0.84581			14.044	5.397	0.775372	0.0649263											15.01	87.862	1.14745	1.25922			85.935	0.879	6.56938	0.0125977			19.367	33.777	1.48053	0.484086				23.189	151.347	0.959891	1.17575			17.744	2.122
			19.368	79.427	1.06931	0.955512			11.433	7.36	0.631218	0.0885413											17.183	98.072	1.31357	1.40555			14.151	1.456	1.08179	0.0208672			16.029	32.639	1.22535	0.467777				24.439	157.771	1.01163	1.22566			113.052	1.258
			22.125	96.578	1.22152	1.16184			43.596	0.67	2.40694	0.00806014											16.566	90.386	1.2664	1.2954			65.605	1.568	5.01523	0.0224723			22.953	56.488	1.75466	0.809577				24.897	145.316	1.03059	1.1289			121.123	1.476
			19.857	92.903	1.09631	1.11763			13.34	11.996	0.736504	0.144313											16.128	81.771	1.23292	1.17193			57.885	1.499	4.42507	0.0214834			23.238	58.367	1.77645	0.836506				24.217	116.54	1.00244	0.90535			101.06	1.285
			17.437	78.942	0.9627	0.949677			20.812	0.719	1.14903	0.00864962											15.34	76.481	1.17268	1.09611			75.645	1.536	5.78275	0.0220137			21.418	53.258	1.63732	0.763285				29.825	187.666	1.23458	1.4579			18.494	1.906
			16.969	83.674	0.936861	1.0066			38.308	2.879	2.11499	0.0346346											15.841	81.149	1.21098	1.16301			68.537	1.961	5.23937	0.0281047			21.965	44.535	1.67913	0.638268				22.975	139.053	0.951032	1.08024			17.179	1.619
			17.882	70.461	0.987268	0.84765			23.462	1.022	1.29534	0.0122947											15.461	77.776	1.18193	1.11467			80.983	1.617	6.19082	0.0231746			22.86	42.001	1.74755	0.601951				26.213	181.975	1.08507	1.41369			189.245	1.137
			13.387	61.374	0.739098	0.738333			20.786	0.847	1.1476	0.0101895											14.896	70.857	1.13874	1.01551			75.46	0.767	5.76861	0.0109925			20.122	42.266	1.53824	0.605749				15.997	68.216	0.662183	0.529941			50.73	1.422
			19.308	90.093	1.066	1.08382			8.031	0.718	0.443393	0.00863759											17.061	95.912	1.30424	1.37459			36.211	1.009	2.76818	0.0144608			22.405	53.25	1.71277	0.76317				26.442	155.001	1.09455	1.20414			54.985	1.54
			15.778	73.302	0.871106	0.881828			13.02	9.124	0.718836	0.109762											17.076	95.643	1.30539	1.37074			34.522	1.017	2.63907	0.0145755			22.313	59.036	1.70574	0.846094				23.389	112.876	0.968169	0.876886			147.388	1.079
			18.183	84.183	1.00389	1.01273			36.108	0.57	1.99353	0.00685714											16.324	87.315	1.2479	1.25138			27.331	0.909	2.08934	0.0130276										23.253	127.382	0.96254	0.989577			18.898	1.032
			18.878	86.519	1.04226	1.04083			31.299	0.365	1.72802	0.00439097											13.121	75.492	1.00305	1.08194			53.033	2.083	4.05416	0.0298532										27.9	152.94	1.1549	1.18813			35.907	1.147
			18.262	82.591	1.00825	0.993575			117.272	1.68	6.47461	0.0202105											15.209	74.751	1.16267	1.07132			84.035	0.837	6.42413	0.0119957										23.308	124.968	0.964816	0.970824			46.356	1.767
			13.831	48.41	0.763612	0.582375			15.526	8.86	0.857193	0.106586											16.323	77.043	1.24783	1.10417			89.636	2.331	6.8523	0.0334075										24.758	132.372	1.02484	1.02834			73.487	2.554
			18.836	91.374	1.03994	1.09924			38.473	0.725	2.1241	0.0087218											15.411	76.856	1.17811	1.10149			35.928	0.768	2.74655	0.0110068										27.867	164.316	1.15353	1.2765			40.722	0.824
			16.57	72.84	0.914832	0.87627			65.396	0.54	3.61052	0.00649624											15.58	87.083	1.19103	1.24806			40.738	1.076	3.11425	0.0154211										24.46	146.07	1.0125	1.13476			16.437	1.944
			12.402	55.342	0.684716	0.665768			38.935	3.143	2.14961	0.0378105											16.111	87.025	1.23162	1.24723			13.102	8.254	1.00159	0.118295										23.972	156.593	0.992302	1.2165			32.173	1.338
			18.795	88.581	1.03768	1.06564			36.752	0.755	2.02908	0.0090827											15.862	83.074	1.21258	1.1906			38.288	1.399	2.92696	0.0200502										23.981	155.186	0.992675	1.20557			149.564	1.473
			19.502	105.518	1.07671	1.26939			12.536	9.164	0.692115	0.110244											14.404	80.131	1.10113	1.14842			26.721	1.196	2.04271	0.0171409										29.114	176.309	1.20515	1.36967			12.776	3.817
			20.144	106.723	1.11215	1.28388			42.814	0.887	2.36377	0.0106707											15.623	86.248	1.19431	1.23609			11.453	4.332	0.875535	0.0620855										29.424	183.92	1.21798	1.4288			30.358	7.687
			12.277	53.08	0.677815	0.638556			12.892	8.324	0.711769	0.100138											9.706	46.269	0.741984	0.66312			39.416	0.965	3.01319	0.0138302										30.49	189.198	1.26211	1.4698			17.062	7.132
			18.371	90.053	1.01427	1.08334			34.099	0.646	1.88261	0.00777142											13.809	73.551	1.05564	1.05412			36.566	1.07	2.79532	0.0153351										29.389	170.472	1.21653	1.32433			110.299	0.962
			17.074	78.327	0.942658	0.942279			39.149	0.788	2.16142	0.00947969											16.035	88.616	1.22581	1.27003			24.838	0.82	1.89876	0.0117521										26.719	165.384	1.10601	1.2848			22.518	1.175
			19.418	89.177	1.07207	1.07281			177.208	1.141	9.78368	0.0137263											15.93	86.284	1.21778	1.23661			51.546	1.629	3.94048	0.0233466										29.135	184.157	1.20602	1.43064			88.927	1.743
			15.857	69.186	0.875468	0.832312			18.491	0.559	1.02089	0.00672481											15.82	76.564	1.20937	1.0973			11.889	1.839	0.908865	0.0263562										22.404	149.647	0.927396	1.16254			28.084	1.109
			19.393	83.026	1.07069	0.998808			21.238	1.099	1.17255	0.013221											15.45	80.05	1.18109	1.14726			39.683	0.741	3.0336	0.0106199										27.51	155.581	1.13875	1.20864			29.787	0.716
			18.02	79.885	0.994887	0.961022			33.719	1.568	1.86163	0.0188631											9.772	46.34	0.747029	0.664137			38.764	0.812	2.96335	0.0116374										27.814	140.348	1.15134	1.0903			25.718	4.775
			18.013	87.546	0.994501	1.05318			16.451	1.08	0.908262	0.0129925											15.658	81.005	1.19699	1.16095			55.846	1.216	4.2692	0.0174275										23.023	130.601	0.953019	1.01458			12.529	3.387
			20.269	103.042	1.11905	1.2396			10.884	8.957	0.600907	0.107753											13.429	74.402	1.02659	1.06632			33.268	0.794	2.5432	0.0113795										21.211	111.736	0.878013	0.86803			208.534	4.684
			21.003	95.641	1.15958	1.15057			11.619	9.697	0.641487	0.116656											15.171	83.256	1.15976	1.19321			24.634	1.034	1.88317	0.0148191										24.766	137.93	1.02517	1.07152			16.695	8.029
			16.627	64.933	0.917979	0.781148			29.024	0.593	1.60242	0.00713383											15.508	75.501	1.18552	1.08207			39.749	0.794	3.03865	0.0113795										23.909	144.155	0.989694	1.11988			50.052	1.759
			14.892	66.912	0.82219	0.804956			12.021	1.807	0.663681	0.0217383											14.853	88.276	1.13545	1.26516			41.66	1.064	3.18474	0.0152491										19.938	106.609	0.825318	0.8282			54.974	2.123
			16.472	73.984	0.909422	0.890032			41.035	0.907	2.26555	0.0109113											16.79	82.757	1.28353	1.18606			46.549	0.796	3.55848	0.0114081										21.1	128.764	0.873418	1.00031			17.84	1.313
			16.516	70.386	0.911851	0.846748			69.579	0.685	3.84147	0.00824059											14.033	73.819	1.07277	1.05796			25.631	0.723	1.95938	0.0103619										20.208	110.81	0.836494	0.860836			92.314	1.414
			14.799	66.581	0.817055	0.800974			14.807	17.403	0.817497	0.209359											15.302	82.953	1.16978	1.18887			83.266	0.57	6.36534	0.00816915										21.495	109.14	0.889769	0.847863			80.899	2.102
			18.174	84.181	1.00339	1.0127			12.205	1.673	0.67384	0.0201263											14.052	79.456	1.07422	1.13875			251.536	6.797	19.2289	0.0974135										24.576	158.187	1.0173	1.22889			24.072	3.759
			13.913	58.156	0.768139	0.69962			14.66	0.544	0.809381	0.00654436											16.158	87.748	1.23521	1.25759			43.568	2.121	3.3306	0.0303978										28.967	179.944	1.19907	1.39791			73.713	5.68
			19.021	83.957	1.05015	1.01001			45.335	0.566	2.50295	0.00680902											14.229	74.055	1.08775	1.06134			199.952	1.41	15.2855	0.0202079										27.913	170.934	1.15544	1.32791			18.619	2.367
			17.876	95.507	0.986937	1.14896			13.767	0.751	0.760078	0.00903458											15.218	84.841	1.16335	1.21593			137.82	0.987	10.5358	0.0141455										25.876	129.634	1.07112	1.00707			52.187	1.589
			16.473	70.328	0.909477	0.84605			14.134	1.795	0.78034	0.021594											15.775	80.027	1.20593	1.14693			45.551	0.557	3.48219	0.00798283										20.965	104.898	0.86783	0.814908			17.261	6.786
			16.12	79.229	0.889988	0.95313			58.497	0.648	3.22963	0.00779548											14.061	74.102	1.07491	1.06202			34.691	2.593	2.65198	0.0371624										24.432	130.852	1.01134	1.01653			33.271	1.654
			14.166	58.56	0.782107	0.704481			56.051	1.252	3.09458	0.0150616											15.749	80.533	1.20395	1.15419			208.193	4.12	15.9155	0.0590472										25.973	176.727	1.07513	1.37292			21.285	1.506
			18.653	91.548	1.02984	1.10133			9.86	5.105	0.544372	0.0614135											16.008	80.843	1.22375	1.15863			18.331	8.176	1.40133	0.117177										26.807	136.21	1.10965	1.05816			122.854	5.203
			21.213	130.856	1.17117	1.57421			32.421	0.677	1.78997	0.00814435											14.629	76.316	1.11833	1.09375			42.598	0.684	3.25644	0.00980297										29.441	184.021	1.21869	1.42958			93.212	1.491
			17.432	90.057	0.962424	1.08339			73.256	0.786	4.04448	0.00945563											15.996	97.017	1.22283	1.39043			109.115	5.085	8.34139	0.0728774										27.049	163.805	1.11967	1.27253			22.79	2.723
			18.775	82.339	1.03657	0.990544			22.852	0.923	1.26166	0.0111038											14.737	83.133	1.12658	1.19145			100.743	1.64	7.70139	0.0235042										23.905	151.649	0.989529	1.1781			23.111	0.884
			17.928	84.036	0.989808	1.01096			40.231	0.758	2.22116	0.00911879											14.557	73.466	1.11282	1.0529			70.313	1.425	5.37514	0.0204229										18.798	119.81	0.778129	0.930753			20.64	0.899
			15.849	58.881	0.875026	0.708342			26.432	0.882	1.45932	0.0106105											15.348	79.718	1.17329	1.14251			52.15	0.562	3.98665	0.00805449										23.678	138.13	0.980132	1.07307			50.891	3.702
			18.798	83.288	1.03784	1.00196			13.561	1.962	0.748705	0.023603											15.722	85.541	1.20188	1.22596			164.234	0.713	12.555	0.0102186										29.227	170.183	1.20983	1.32208			47.338	1.635
			18.636	84.675	1.0289	1.01865			13.924	36.195	0.768746	0.435428											15.808	85.395	1.20846	1.22387			105.936	0.995	8.09837	0.0142602										28.091	167.224	1.1628	1.29909			43.792	0.811
			17.373	88.826	0.959166	1.06858			35.915	0.759	1.98287	0.00913082											16.581	87.621	1.26755	1.25577			236.862	5.327	18.1071	0.0763457										28.133	183.533	1.16454	1.42579			72.969	1.185
			16.939	81.109	0.935205	0.975747			13.193	31.337	0.728388	0.376986											15.327	96.05	1.17169	1.37657			196.616	3.186	15.0305	0.0456612										24.934	114.776	1.03212	0.891646			15.898	5.798
			19.509	99.426	1.0771	1.1961			13.333	1.457	0.736117	0.0175278											17.314	95.791	1.32358	1.37286			212.797	2.576	16.2675	0.0369188										22.098	124.169	0.914729	0.964617			127.496	1.201
			22.238	106.611	1.22776	1.28254			22.635	3.826	1.24968	0.046027											16.454	95.621	1.25784	1.37042			227.024	5.67	17.3551	0.0812615										22.334	134.268	0.924498	1.04307			25.423	5.847
			18.151	90.525	1.00212	1.08902			17.878	0.705	0.987047	0.0084812											16.45	98.657	1.25754	1.41394			25.468	0.558	1.94692	0.00799716										18.248	78.831	0.755362	0.612405			62.007	5.07
			19.093	99.517	1.05413	1.1972			35.744	0.794	1.97343	0.00955187											15.067	74.75	1.15181	1.0713			32.644	1.291	2.4955	0.0185024										27.053	168.204	1.11984	1.30671			63.206	1.642
			16.31	74.242	0.900478	0.893136			16.286	3.64	0.899153	0.0437894											14.226	82.652	1.08752	1.18455			112.198	3.395	8.57708	0.0486566										21.165	101.283	0.876109	0.786825			71.189	1.676
			17.838	77.975	0.984839	0.938044			30.647	0.885	1.69203	0.0106466											16.042	85.309	1.22635	1.22263			19.21	1.401	1.46853	0.0200789										21.845	141.458	0.904257	1.09893			21.586	5.341
			17.778	93.602	0.981526	1.12604			18.388	1.731	1.0152	0.020824											15.98	80.785	1.22161	1.1578			41.484	0.732	3.17128	0.0104909										25.564	161.499	1.0582	1.25462			26.789	2.838
			20.542	115.728	1.13413	1.39222			15.45	1.795	0.852997	0.021594											15.429	81.402	1.17948	1.16664			33.362	0.933	2.55039	0.0133716										21.747	126.886	0.9002	0.985724			13.728	17.425
			19.08	86.692	1.05341	1.04291			15.239	1.591	0.841348	0.0191398											16.316	101.635	1.24729	1.45662			75.647	1.977	5.7829	0.028334										25.602	155.003	1.05977	1.20415			39.354	0.735
			3.105	4.168	0.171428	0.0501413			11.273	2.69	0.622384	0.0323609											15.629	83.192	1.19477	1.19229			34.097	0.561	2.60658	0.00804016										23.753	142.321	0.983237	1.10563			55.46	0.707
			19.175	94.137	1.05865	1.13247			48.463	1.305	2.67565	0.0156992											13.991	64.638	1.06955	0.926381			182.299	3.619	13.936	0.0518669										24.915	151.861	1.03134	1.17974			56.578	1.376
			18.925	94.165	1.04485	1.13281			22.597	2.43	1.24758	0.0292331											16.134	89.422	1.23338	1.28158			67.97	0.749	5.19603	0.0107345										28.177	163.418	1.16636	1.26953			33.776	0.756
			16.397	68.326	0.905281	0.821966			16.498	0.623	0.910857	0.00749473											14.53	72.291	1.11076	1.03606			27.077	0.694	2.06993	0.00994629										21.138	122.145	0.874991	0.948893			17.637	10.823
			17.751	80.71	0.980036	0.970947			84.383	1.095	4.6588	0.0131729											9.071	34.901	0.693441	0.500195			25.55	0.697	1.95319	0.00998929										23.003	143.149	0.952191	1.11206			18.909	1.719
			11.551	35.004	0.637733	0.4211			157.167	0.992	8.67722	0.0119338											14.999	81.181	1.14661	1.16347			14.263	43.677	1.09035	0.625972										27.884	162.224	1.15424	1.26025			23.859	10.999
			19.754	99.498	1.09062	1.19697			14.161	2.417	0.781831	0.0290767											15.12	81.886	1.15586	1.17358			40.27	0.575	3.07848	0.0082408										21.883	120.56	0.90583	0.93658			14.525	2.245
			21.941	109.08	1.21137	1.31224			36.25	1.124	2.00137	0.0135218											16.128	84.687	1.23292	1.21372			216.794	4.196	16.573	0.0601364										24.188	147.419	1.00124	1.14524			17.322	11.097
			19.103	94.966	1.05468	1.14245			20.032	1.025	1.10597	0.0123308											14.651	80.182	1.12001	1.14916			30.452	0.762	2.32793	0.0109209										27.598	183.522	1.1424	1.4257			17.12	1.235
			18.493	82.789	1.021	0.995957			52.824	1.153	2.91642	0.0138707											13.987	67.094	1.06925	0.96158			207.012	0.85	15.8252	0.0121821										24.69	135.618	1.02202	1.05356			21.231	6.107
			18.18	92.828	1.00372	1.11673			52.308	1.445	2.88793	0.0173834											16.44	86.979	1.25677	1.24657			15.915	0.471	1.21664	0.00675029										25.769	126.205	1.06669	0.980433			24.419	2.145
			16.082	80.563	0.88789	0.969178			20.982	1.34	1.15842	0.0161203											14.95	78.118	1.14287	1.11957			32.615	0.602	2.49328	0.00862776										22.615	99.497	0.93613	0.77295			104.204	1.585
			17.347	78.177	0.957731	0.940474			151.85	0.923	8.38366	0.0111038											8.807	37.394	0.673259	0.535925			55.497	1.699	4.24252	0.0243498										26	156.154	1.07625	1.21309			39.523	3.977
			18.504	88.172	1.02161	1.06071			19.869	0.591	1.09697	0.00710977											16.239	87.636	1.24141	1.25598			59.734	1.645	4.56642	0.0235759										20.511	124.369	0.849037	0.96617			129.804	1.759
			18.362	84.987	1.01377	1.0224			33.079	2.965	1.8263	0.0356691											15.854	78.071	1.21197	1.1189			167.632	2.604	12.8148	0.0373201										14.23	63.731	0.58904	0.495099			20.826	5.521
			17.482	73.674	0.965184	0.886303			35.706	0.664	1.97133	0.00798796											16.996	87.784	1.29927	1.25811			88.139	0.666	6.73787	0.009545										25.199	154.28	1.04309	1.19854			21.161	4.457
			17.624	88.095	0.973024	1.05979			157.896	0.867	8.71746	0.0104301											16.987	84.571	1.29859	1.21206			125.009	1.03	9.55643	0.0147618										29.097	188.987	1.20445	1.46816			39.131	1.107
			21.428	104.23	1.18304	1.25389			13.646	2.435	0.753398	0.0292932											15.381	84.648	1.17581	1.21316			89.256	0.603	6.82326	0.0086421										16.883	104.818	0.698859	0.814287			29.187	0.834
			16.453	69.975	0.908373	0.841804			26.38	0.557	1.45644	0.00670075											15.174	79.257	1.15999	1.1359			35.312	0.558	2.69946	0.00799716										22.565	98.479	0.934061	0.765042			49.356	0.837
			18.143	84.004	1.00168	1.01057			16.368	0.718	0.90368	0.00863759											15.33	83.788	1.17192	1.20084			71.704	1.909	5.48148	0.0273595										27.187	180.767	1.12538	1.4043			26.88	0.812
			17.941	88.505	0.990526	1.06472			25.411	0.547	1.40295	0.00658045											14.084	68.675	1.07666	0.984239			29.663	1.472	2.26761	0.0210965										23.112	134.909	0.956703	1.04805			14.903	7.407
			16.236	76.443	0.896392	0.919614			31.466	0.633	1.73724	0.00761503											14.636	74.616	1.11886	1.06938			65.856	0.665	5.03442	0.00953067										27.304	155.585	1.13023	1.20867			33.096	4.713
			16.221	71.197	0.895564	0.856505			9.863	6.608	0.544538	0.0794947											16.124	85.936	1.23261	1.23162			22.297	0.717	1.70451	0.0102759										24.075	149.383	0.996566	1.16049			13.812	14.588
			16.514	64.249	0.911741	0.77292			32.656	0.954	1.80294	0.0114767											16.221	88.886	1.24003	1.2739			23.998	0.613	1.83455	0.00878541										29.127	167.001	1.20569	1.29736			45.735	4.107
			16.632	76.459	0.918255	0.919807			18.234	3.615	1.0067	0.0434887											14.551	68.792	1.11236	0.985916			19.102	1.378	1.46027	0.0197493										28.346	159.399	1.17336	1.2383			19.615	7.014
			18.518	99.055	1.02238	1.19164			27.96	2.809	1.54368	0.0337925											15.145	79.276	1.15777	1.13617			108.509	1.165	8.29507	0.0166966										25.073	148.924	1.03788	1.15693			15.346	8.972
			19.61	97.839	1.08267	1.17701			42.862	2.105	2.36642	0.0253233											17.475	91.539	1.33589	1.31192			147.322	2.61	11.2622	0.0374061										29.886	186.133	1.23711	1.44599			41.1	5.382
			18.068	88.561	0.997537	1.06539			34.445	1.23	1.90171	0.014797											13.887	70.347	1.0616	1.0082			179.205	2.754	13.6995	0.0394699										21.501	102.034	0.890017	0.792659			38.21	1.686
			19.418	91.989	1.07207	1.10663			186.567	0.843	10.3004	0.0101413											14.549	73.804	1.11221	1.05775			18.112	0.887	1.38459	0.0127123										30.932	199.081	1.28041	1.54658			13.302	2.747
			15.98	71.183	0.882258	0.856336			135.746	1.139	7.49456	0.0137022											14.892	72.035	1.13843	1.03239			33.812	0.68	2.58479	0.00974565										24.649	154.231	1.02033	1.19816			13.853	1.001
			16.821	69.387	0.92869	0.83473			165.023	1.663	9.11095	0.020006											13.37	60.887	1.02208	0.872622			16.4	3.121	1.25371	0.0447297										19.283	101.807	0.798205	0.790896			12.714	3.325
			18.461	88.175	1.01923	1.06075			22.681	1.382	1.25222	0.0166256											15.819	76.622	1.2093	1.09813			23.974	0.564	1.83271	0.00808315										23.425	140.015	0.96966	1.08772			31.857	0.97
			15.134	62.027	0.835551	0.746189			55.508	1.561	3.06461	0.0187789											15.426	82.861	1.17925	1.18755			204.404	2.559	15.6258	0.0366752										27.366	169.727	1.13279	1.31854			32.612	1.423
			16.873	80.752	0.931561	0.971452			134.203	1.035	7.40937	0.0124511											14.04	77.333	1.0733	1.10832			27.977	0.692	2.13873	0.00991763										17.858	82.392	0.739218	0.640069			58.897	1.225
			20.716	98.992	1.14373	1.19088			73.873	1.373	4.07854	0.0165173											15.156	80.139	1.15861	1.14854			13.866	2.527	1.06	0.0362165										20.156	107.182	0.834342	0.832652			13.744	4.906
			19.389	89.473	1.07047	1.07637			27.66	1.227	1.52711	0.0147609											15.566	81.805	1.18996	1.17242			82.379	0.776	6.29754	0.0111215										27.586	189.562	1.1419	1.47263			45.504	1.198
			18.946	97.645	1.04601	1.17468			153.694	1.399	8.48547	0.0168301											14.165	71.658	1.08286	1.02699			9.128	1.427	0.697798	0.0204515										27.721	176.671	1.14749	1.37248			29.5	4.89
			14.814	49.941	0.817883	0.600794			20.675	2.097	1.14147	0.025227											16.595	93.976	1.26862	1.34685			36.993	1.416	2.82796	0.0202939										27.583	170.567	1.14178	1.32506			34.937	1.182
			17.895	73.301	0.987986	0.881816			20.376	2.336	1.12496	0.0281022											14.986	92.003	1.14562	1.31857			58.55	1.32	4.47591	0.018918										25.829	143.583	1.06917	1.11544			13.027	16.972
			18.711	82.974	1.03304	0.998183			19.628	1.648	1.08367	0.0198255											14.147	78.857	1.08148	1.13017			125.104	1.87	9.56369	0.0268005										22.672	103.933	0.93849	0.807412			15.091	3.719
			17.951	81.9	0.991078	0.985262			18.61	1.659	1.02746	0.0199579											12.845	63.882	0.981948	0.915546			44.672	0.646	3.41499	0.00925836										27.393	170.877	1.13391	1.32747			15.232	1.374
			20.097	93.959	1.10956	1.13033			33.759	1.085	1.86384	0.0130526											17.525	104.663	1.33971	1.50001			88.168	3.236	6.74008	0.0463778										15.168	77.877	0.627868	0.604994			22.415	4.817
			16.236	70.871	0.896392	0.852583			91.406	1.068	5.04654	0.0128481											14.296	77.264	1.09287	1.10733			43.284	1.319	3.30888	0.0189037										27.653	173.194	1.14467	1.34547			12.866	19.192
			16.434	74.177	0.907324	0.892354			163.032	0.933	9.00102	0.0112241											14.486	76.886	1.1074	1.10192			64.624	0.769	4.94024	0.0110212										23.731	122.568	0.982326	0.952179			33.89	1.483
			18.922	83.604	1.04469	1.00576			50.746	0.553	2.80169	0.00665263											14.803	68.954	1.13163	0.988237			89.867	1.07	6.86996	0.0153351										25.102	148.72	1.03908	1.15534			163.103	1.463
			17.221	73.059	0.950774	0.878905			40.221	0.694	2.22061	0.00834887											14.743	71.473	1.12704	1.02434			91.075	1.578	6.96231	0.0226156										27.716	159.325	1.14728	1.23773			18.477	3.458
			18.348	85.9	1.013	1.03338			63.774	1.616	3.52097	0.0194406											16.05	84.324	1.22696	1.20852			48.974	1.524	3.74386	0.0218417										24.913	147.461	1.03125	1.14556			12.404	5.274
			20.106	91.618	1.11006	1.10217			74.673	1.587	4.12271	0.0190917											12.29	48.302	0.93952	0.692256			31.315	0.708	2.3939	0.0101469										22.634	153.46	0.936917	1.19217			24.449	2.473
			19.366	99.97	1.0692	1.20265			92.398	1.024	5.10131	0.0123188											16.568	90.974	1.26656	1.30382			65.53	0.821	5.0095	0.0117664										21.653	121.73	0.896309	0.945669			46.317	1.271
			4.177	1.765	0.230613	0.0212331			86.194	2.525	4.75878	0.0303759											14.783	82.007	1.1301	1.17531			85.704	0.911	6.55172	0.0130563										22.127	122.002	0.91593	0.947782			37.049	1.76
			19.655	86.991	1.08516	1.04651			30.233	0.696	1.66917	0.00837293											13.38	68.146	1.02285	0.976657			34.034	0.583	2.60176	0.00835546										24.871	140.385	1.02952	1.09059			79.121	3.182
			15.618	73.445	0.862272	0.883548			108.791	0.738	6.00637	0.00887819											17.325	93.511	1.32443	1.34018			45.524	0.718	3.48012	0.0102903										24.015	117.296	0.994082	0.911223			13.274	17.522
			18.853	106.195	1.04088	1.27753			41.622	1.08	2.29796	0.0129925											15.984	88.885	1.22191	1.27389			82.721	0.803	6.32368	0.0115085										27.805	163.835	1.15097	1.27276			22.635	4.876
			14.19	51.967	0.783432	0.625166			33.987	0.811	1.87643	0.00975638											15.155	87.929	1.15854	1.26018			25.175	0.66	1.92453	0.00945901										25.484	158.477	1.05489	1.23114			14.101	1.475
			15.56	69.505	0.85907	0.83615			72.379	2.799	3.99606	0.0336722											17.119	97.694	1.30868	1.40013			37.705	0.749	2.88239	0.0107345										22.537	119.202	0.932902	0.92603			13.985	5.042
			15.596	63.81	0.861058	0.767638			44.414	1.318	2.4521	0.0158556											16.162	88.504	1.23552	1.26842			23	0.563	1.75826	0.00806882										25.325	151.567	1.04831	1.17746			14.622	18.935
			19.97	97.671	1.10255	1.17499			49.182	1.06	2.71535	0.0127519											13.88	63.212	1.06107	0.905944			51.601	0.79	3.94469	0.0113221										28.741	178.544	1.18971	1.38703			16.32	14.199
			20.109	87.159	1.11022	1.04853			86.571	1.121	4.7796	0.0134857											13.405	70.215	1.02476	1.00631			48.939	0.795	3.74119	0.0113938										22.551	139.63	0.933481	1.08473			15.401	14.754
			20.147	93.204	1.11232	1.12125			22.958	1.45	1.26751	0.0174436											14.583	79.981	1.11481	1.14627			33.061	0.637	2.52738	0.00912938										25.277	131.653	1.04632	1.02276			13.307	9.396
			18.9	91.893	1.04347	1.10548			10.357	3.574	0.571812	0.0429955											12.174	66.042	0.930652	0.946503			22.403	0.528	1.71262	0.00756721										24.747	144.888	1.02438	1.12557			13.828	6.167
			17.524	89.415	0.967503	1.07567			16.878	0.545	0.931837	0.00655639											16.255	83.882	1.24263	1.20218			121.089	0.846	9.25676	0.0121247										24.378	134.487	1.00911	1.04477			45.132	0.875
			17.057	90.081	0.94172	1.08368			18.753	1.551	1.03536	0.0186586											13.661	69.648	1.04433	0.998184			13.032	0.776	0.996243	0.0111215										24.057	126.265	0.995821	0.980899			14.593	4.608
			18.664	99.81	1.03044	1.20072			15.458	14.391	0.853439	0.173125											14.017	67.174	1.07154	0.962727			40.614	0.773	3.10477	0.0110785										26.043	151.179	1.07803	1.17445			34.83	1.026
			16.84	84.769	0.929739	1.01978			83.838	0.807	4.62871	0.00970826											15.193	74.568	1.16144	1.0687			37.812	1.303	2.89057	0.0186744										26.5	184.063	1.09695	1.42991			24.209	2.027
			18.864	86.432	1.04148	1.03978			36.236	5.462	2.0006	0.0657082											14.14	73.566	1.08095	1.05434			67.926	1.051	5.19266	0.0150628										20.17	116.264	0.834921	0.903206			17.709	3.158
			18.81	80.207	1.0385	0.964895			25.008	0.612	1.3807	0.0073624											11.986	56.166	0.916281	0.804962			27.323	0.625	2.08873	0.0089574										24.227	144.375	1.00286	1.12159			34.733	4.867
			18.529	83.043	1.02299	0.999013			99.003	0.608	5.46597	0.00731428											9.844	41.527	0.752533	0.595158			40.721	0.936	3.11295	0.0134146										22.885	127.19	0.947307	0.988085			38.533	1.054
			20.669	95.463	1.14114	1.14843			86.838	3.597	4.79434	0.0432721											16.19	82.939	1.23766	1.18867			25.71	0.64	1.96542	0.00917237										24.161	128.801	1.00013	1.0006			54.839	0.77
			19.685	99.77	1.08681	1.20024			166.214	0.602	9.1767	0.0072421											14.486	74.393	1.1074	1.06619			35.884	1.77	2.74318	0.0253673										26.248	148.864	1.08652	1.15646			25.343	4.337
			21.384	116.922	1.18061	1.40658			15.726	2.127	0.868235	0.0255879											15.141	72.584	1.15747	1.04026			32.87	1.19	2.51278	0.0170549										25.019	141.633	1.03564	1.10029			23.157	5.118
			17.214	85.359	0.950388	1.02687			58.325	0.996	3.22013	0.0119819											14.479	78.723	1.10686	1.12824			72.908	2.072	5.57352	0.0296956										24.17	143.339	1.0005	1.11354			22.967	5.015
			20.14	91.366	1.11193	1.09914			11.476	2.217	0.633592	0.0266707											13.041	70.854	0.996931	1.01547			27.031	0.773	2.06641	0.0110785										24.441	142.403	1.01172	1.10627			14.803	2.519
			21.547	103.532	1.18961	1.2455			91.811	3.543	5.0689	0.0426225											14.192	64.329	1.08492	0.921953			67.044	1.188	5.12524	0.0170262										25.68	144.85	1.063	1.12528			20.149	1.632
			19.119	99.718	1.05556	1.19961			30.924	1.063	1.70732	0.012788											10.087	44.017	0.77111	0.630844			77.018	2.768	5.88771	0.0396705										22.544	117.538	0.933191	0.913103			17.953	16.071
			19.268	95.309	1.06379	1.14657			25.594	0.739	1.41305	0.00889022											13.871	64.57	1.06038	0.925407			31.01	0.756	2.37059	0.0108349										21.886	143.474	0.905954	1.11459			12.504	16.322
			18.284	92.07	1.00946	1.10761			24.805	0.708	1.36949	0.00851729											11.798	62.068	0.901909	0.889548			37.243	0.821	2.84707	0.0117664										23.708	143.63	0.981374	1.1158			22.626	1.277
			20.199	105.857	1.11519	1.27347			11.204	3.443	0.618575	0.0414195											9.983	41.103	0.763159	0.589081			17.979	0.749	1.37442	0.0107345										23.125	136.536	0.957241	1.06069			14.228	1.869
			11.865	45.872	0.655069	0.551843			23.67	2.131	1.30682	0.0256361											12.698	57.316	0.97071	0.821443			15.789	0.687	1.207	0.00984597										25.516	161.358	1.05621	1.25352			12.385	4.799
			21.705	97.036	1.19834	1.16735			18.647	1.131	1.0295	0.013606											13.594	69.692	1.03921	0.998814			31.841	0.724	2.43411	0.0103762										27.51	159.223	1.13875	1.23694			18.306	6.048
			18.231	87.872	1.00654	1.05711			22.745	1.007	1.25576	0.0121143											11.572	62.789	0.884632	0.899882			25.63	0.664	1.95931	0.00951634										23.51	120.835	0.973178	0.938716			14.445	4.266
			19.011	87.009	1.0496	1.04672			57.808	1.467	3.19159	0.0176481											15.86	92.915	1.21243	1.33164			53.956	0.813	4.12472	0.0116518										27.021	163.2	1.11851	1.26783			40.465	1.281
			12.446	47.378	0.687146	0.56996			52.535	0.599	2.90047	0.00720601											10.046	39.809	0.767976	0.570536			28.186	1.045	2.1547	0.0149768										25.098	158.637	1.03891	1.23238			14.675	6.268
			19.725	94.384	1.08902	1.13545			8.717	2.93	0.481267	0.0352481											15.069	79.509	1.15196	1.13951			110.541	0.831	8.45041	0.0119098										23.783	110.158	0.984479	0.855771			95.164	1.027
			18.177	89.322	1.00356	1.07455			38.441	1.231	2.12233	0.014809											13.331	61.776	1.0191	0.885363			41.081	0.749	3.14047	0.0107345										27.708	164.249	1.14695	1.27598			16.773	5.523
			17.68	90.831	0.976116	1.0927			50.854	0.978	2.80766	0.0117654											15.182	85.613	1.1606	1.22699			29.487	0.737	2.25416	0.0105626										21.322	120.774	0.882608	0.938242			24.58	1.352
			22.245	105.019	1.22815	1.26339			77.397	0.784	4.2731	0.00943157											12.843	66.756	0.981795	0.956736			84.372	1.08	6.44989	0.0154784										27.735	162.318	1.14807	1.26098			11.553	0.936
			20.302	91.082	1.12088	1.09572			10.041	5.497	0.554365	0.0661293											14.095	82.399	1.07751	1.18093			9.036	0.689	0.690765	0.00987463										23.059	122.181	0.954509	0.949173			17.27	1.809
			22.359	107.823	1.23444	1.29712			9.399	3.63	0.51892	0.0436691											13.175	56.269	1.00717	0.806438			32.867	1.041	2.51255	0.0149194										24.453	134.136	1.01221	1.04205			73.87	1.453
			20.418	89.486	1.12728	1.07652			15.608	4.48	0.86172	0.0538947											14.121	82.622	1.07949	1.18412			77.855	2.715	5.9517	0.0389109										21.161	89.765	0.875943	0.697346			14.304	8.155
			18.249	85.081	1.00753	1.02353			18.24	1.242	1.00703	0.0149413											14.088	72.655	1.07697	1.04128			94.818	0.977	7.24845	0.0140022										22.347	103.278	0.925037	0.802323			12.575	12.764
			21.317	100.344	1.17692	1.20714			17.723	3.098	0.97849	0.0372691											8	33.993	0.611567	0.487182			76.5	0.797	5.84811	0.0114225										23.154	142.523	0.958442	1.1072			9.713	3.934
			21.498	97.854	1.18691	1.17719			8.62	3.237	0.475912	0.0389413											11.087	48.314	0.847556	0.692428			36.632	0.747	2.80037	0.0107059										22.044	120.699	0.912494	0.93766			12.528	4.58
			18.257	82.211	1.00797	0.989004			20.467	2.071	1.12999	0.0249143											8.681	38.372	0.663627	0.549941			57.854	0.981	4.4227	0.0140595										28.775	179.632	1.19112	1.39549			65.205	15.684
			15.214	68.486	0.839967	0.823891			11.531	16.07	0.636628	0.193323											12.016	58.585	0.918574	0.839631			31.99	1.072	2.4455	0.0153637										22.208	115.508	0.919283	0.897333			21.571	1.153
			20.462	106.339	1.12971	1.27927			9.24	4.178	0.510142	0.0502616											14.361	64.208	1.09784	0.920218			32.324	0.824	2.47104	0.0118094										28.061	175.735	1.16156	1.36521			16.952	1.325
			20.392	101.295	1.12585	1.21859			95.947	0.643	5.29725	0.00773533											13.196	58.006	1.00878	0.831332			22.561	1.068	1.7247	0.0153064										26.124	169.736	1.08138	1.31861			12.113	1.872
			14.844	49.3	0.81954	0.593082			11.473	4.52	0.633426	0.0543759											14.729	84.8	1.12597	1.21534			164.879	1.506	12.6043	0.0215837										25.017	151.575	1.03556	1.17752			14.638	16.089
			19.791	107.987	1.09266	1.29909			13.066	1.976	0.721376	0.0237714											14.624	92.869	1.11794	1.33098			53.344	0.774	4.07793	0.0110928										22.987	117.742	0.951529	0.914688			14.99	1.485
			16.974	78.984	0.937137	0.950183			12.062	2.666	0.665945	0.0320722											12.279	64.212	0.938679	0.920276			66.052	1.048	5.0494	0.0150198										23.393	130.254	0.968335	1.01189			18.449	0.847
			21.932	119.301	1.21087	1.4352			44.182	0.592	2.4393	0.0071218											14.491	74.727	1.10778	1.07097			103.584	1.216	7.91857	0.0174275										20.151	100.172	0.834135	0.778194			15.701	23.856
			21.28	104.063	1.17487	1.25188			24.01	0.671	1.3256	0.00807217											13.78	74.921	1.05342	1.07376			73.869	1.256	5.64698	0.0180008										22.505	123.716	0.931577	0.961097			25.76	0.947
			18.934	78.528	1.04535	0.944697			11.646	1.387	0.642978	0.0166857											10.456	49.674	0.799318	0.71192			64.186	0.965	4.90676	0.0138302										21.202	121.154	0.87764	0.941194			18.458	2.935
			19.388	91.159	1.07041	1.09665			114.756	0.597	6.3357	0.00718195											15.825	75.972	1.20976	1.08882			143.34	0.883	10.9578	0.012655										23.187	100.028	0.959808	0.777075			18.842	2.078
			18.55	97.459	1.02415	1.17244			51.347	0.621	2.83488	0.00747067											15.907	79.867	1.21602	1.14464			58.732	0.817	4.48982	0.0117091										22.965	143.369	0.950618	1.11377			12.378	6.235
			16.449	70.814	0.908152	0.851897			13.068	1.405	0.721486	0.0169022											17.585	100.477	1.3443	1.44002			84.069	0.952	6.42673	0.0136439										21.991	132.957	0.9103	1.03289			26.876	0.783
			18.203	82.985	1.00499	0.998315			12.518	1.777	0.691121	0.0213774											17.323	102.244	1.32427	1.46534			38.897	0.878	2.97352	0.0125834										23.631	142.971	0.978187	1.11068			26.78	1.591
			17.268	74.679	0.953369	0.898393			29.729	1.684	1.64134	0.0202586											17.205	96.865	1.31525	1.38825			78.795	1.015	6.02355	0.0145468										23.99	140.443	0.993047	1.09104			18.795	17.119
			16.897	85.713	0.932886	1.03113			36.934	0.744	2.03913	0.00895037											14.604	69.07	1.11642	0.9899			36.016	1.116	2.75328	0.0159943										25.956	149.822	1.07443	1.1639			11.07	4.105
			17.845	85.268	0.985225	1.02578			27.412	0.683	1.51342	0.00821653											17.113	95.738	1.30822	1.3721			21.503	0.859	1.64382	0.012311										21.015	108.507	0.8699	0.842945			15.085	5.488
			22.071	107.051	1.21854	1.28783			12.004	6.744	0.662743	0.0811308											8.761	38.46	0.669743	0.551202			191.96	2.67	14.6746	0.038266										19.886	101.817	0.823165	0.790973			17.347	1.751
			22.775	114.55	1.25741	1.37804			13.484	1.073	0.744454	0.0129083											13.629	62.698	1.04188	0.898577			47.605	0.888	3.63921	0.0127267										23.607	137.52	0.977193	1.06833			14.88	11.003
			18.879	78.67	1.04231	0.946405			39.235	0.595	2.16617	0.00715789											8.304	37.24	0.634807	0.533718			142.062	0.819	10.8601	0.0117378										19.354	106.747	0.801144	0.829272			42.77	0.679
			17.977	78.121	0.992513	0.939801			11.01	7.515	0.607864	0.0904059											14.423	78.055	1.10258	1.11867			18.009	0.814	1.37671	0.0116661										23.068	135.129	0.954882	1.04976			66.27	2.954
			19.316	80.732	1.06644	0.971211			11.705	13.243	0.646235	0.159314											13.689	62.908	1.04647	0.901587			17.488	0.956	1.33689	0.0137012										22.217	129.348	0.919655	1.00485			36.988	1.78
			19.859	98.775	1.09642	1.18827			82.055	1.047	4.53027	0.0125955											17.328	88.757	1.32465	1.27205			40.589	0.725	3.10286	0.0103906										23.858	134.173	0.987583	1.04233			24.638	0.948
			20.619	100.228	1.13838	1.20575			64.341	0.575	3.55228	0.00691729											14.163	79.582	1.0827	1.14056			63.646	1.094	4.86548	0.015679										24.178	142.415	1.00083	1.10636			11.004	1.376
			20.023	80.135	1.10547	0.964029			114.091	0.827	6.29898	0.00994886											16.112	85.488	1.2317	1.2252			86.217	1.245	6.59094	0.0178431										22.407	128.367	0.92752	0.997229			31.665	1.31
			18.537	76.205	1.02343	0.916751			25.776	0.425	1.4231	0.00511278											15.948	101.929	1.21916	1.46083			103.927	2.01	7.94479	0.028807										22.201	125.211	0.918993	0.972711			15.13	1.77
			20.277	99.477	1.1195	1.19671			11.79	2.667	0.650928	0.0320842											15.57	85.463	1.19026	1.22484			37.568	1.192	2.87192	0.0170835										25.819	135.505	1.06876	1.05268			46.774	0.88
			18.459	84.335	1.01912	1.01456			8.59	4.304	0.474255	0.0517774											14.63	72.937	1.1184	1.04532			125.826	2.743	9.61888	0.0393122										26.929	165.738	1.1147	1.28755			17.863	44.114
			18.961	93.16	1.04684	1.12072			53.01	0.624	2.92669	0.00750676											17.532	103.286	1.34025	1.48028			130.787	2.017	9.99813	0.0289073										20.064	121.305	0.830534	0.942367			15.771	25.683
			20.063	104.048	1.10768	1.2517			18.506	1.324	1.02172	0.0159278											15.549	89.136	1.18866	1.27748			37.07	0.382	2.83385	0.00547476										23.605	134.805	0.977111	1.04724			21.168	0.912
			17.872	68.745	0.986716	0.827007			21.626	0.535	1.19398	0.00643609											16.482	95.967	1.25998	1.37538			226.334	11.658	17.3023	0.167081										23.736	130.913	0.982533	1.01701			18.564	22.361
			20.202	91.665	1.11536	1.10274			50.061	0.589	2.76388	0.00708571											14.761	60.356	1.12842	0.865012			127.634	4.703	9.7571	0.0674026										20.525	115.449	0.849616	0.896875			14.452	2.925
			18.259	82.182	1.00808	0.988655			56.871	0.637	3.13986	0.00766315											15.309	81.865	1.17031	1.17328			157.56	4.406	12.0448	0.0631461										24.83	138.005	1.02782	1.0721			62.984	19.746
			21.815	102.033	1.20441	1.22746			19.919	21.645	1.09973	0.260391											16.035	88.157	1.22581	1.26345			100.007	10.712	7.64513	0.153523										22.49	129.215	0.930956	1.00382			55.906	24.459
			17.865	78.215	0.98633	0.940932			14.694	9.482	0.811258	0.114069											16.576	81.321	1.26717	1.16548			34.471	0.683	2.63517	0.00978864										22.905	109.251	0.948135	0.848725			24.273	1.274
			23.565	108.673	1.30103	1.30734			9.992	1.299	0.55166	0.0156271											17.458	91.982	1.33459	1.31827			31.607	11.217	2.41623	0.16076										20.43	105.989	0.845684	0.823384			75.176	1.811
			18.622	92.65	1.02812	1.11459			10.889	19.006	0.601183	0.228643											17.291	100.988	1.32183	1.44734			179.964	2.59	13.7575	0.0371195										23.57	136.134	0.975662	1.05757			31.766	39.326
			19.443	96.393	1.07345	1.15961			19.2	2.606	1.06004	0.0313504											16.598	87.648	1.26885	1.25616			175.335	12.55	13.4036	0.179865										22.389	130.956	0.926775	1.01734			35.736	24.033
			20.969	99.504	1.1577	1.19704			28.048	9.194	1.54853	0.110604											16.629	95.001	1.27122	1.36154			144.422	9.892	11.0405	0.141771										24.619	133.39	1.01908	1.03625			27.184	0.599
			21.423	99.882	1.18277	1.20159			78.675	1.333	4.34366	0.0160361											16.905	104.844	1.29232	1.50261			189.349	5.248	14.475	0.0752135										24.628	135.354	1.01946	1.05151			15.529	27.663
			18.815	78.582	1.03878	0.945347			12.222	13.321	0.674779	0.160253											14.319	67.263	1.09463	0.964002			179.764	3.606	13.7422	0.0516806										23.975	142.812	0.992426	1.10945			49.076	8.362
			16.096	70.623	0.888663	0.849599			12.424	11.136	0.685931	0.133967											17.264	100.074	1.31976	1.43424			178.78	2.607	13.667	0.0373631										22.993	135.307	0.951777	1.05114			31.557	0.88
			18.9	112.411	1.04347	1.35231			70.517	4.785	3.89326	0.0575639											17.485	100.664	1.33666	1.4427			44.563	10.09	3.40666	0.144608										21.101	115.322	0.873459	0.895888			20.806	1.611
			20.348	94.933	1.12342	1.14205			21.106	3.748	1.16527	0.0450887											17.697	99.659	1.35286	1.4283			214.61	7.313	16.4061	0.104809										21.975	119.026	0.909638	0.924663			17.482	9.182
			19.447	90.529	1.07367	1.08907			10.311	15.377	0.569272	0.184986											15.188	63.744	1.16106	0.913568			115.501	2.91	8.82958	0.0417056										22.649	120.323	0.937538	0.934739			11.838	6.21
			16.054	77.405	0.886344	0.931187			14.041	26.254	0.775206	0.315837											15.669	72.127	1.19783	1.03371			111.542	2.971	8.52693	0.0425799										23.516	118.299	0.973426	0.919015			34.809	2.054
			20.766	100.726	1.14649	1.21174			17.504	16.049	0.966399	0.193071											14.077	71.383	1.07613	1.02305			65.054	0.821	4.97311	0.0117664										21.973	134.981	0.909555	1.04861			28.742	1.102
			17.354	86.358	0.958117	1.03889			186.031	3.506	10.2708	0.0421774											13.876	68.757	1.06076	0.985414			218.377	4.203	16.694	0.0602367										23.492	151.632	0.972433	1.17797			29.088	0.778
			18.531	86.91	1.0231	1.04553			19.943	1.246	1.10106	0.0149895											17.176	97.317	1.31303	1.39473			17.097	16.901	1.307	0.242222										24.894	141.481	1.03047	1.09911			18.499	21.354
			22.529	117.497	1.24383	1.4135			42.312	8.6	2.33605	0.103459											17.593	101.698	1.34491	1.45752			96.762	7.614	7.39706	0.109123										22.553	108.341	0.933564	0.841655			30.982	0.974
			19.612	98.187	1.08278	1.1812			15.94	1.29	0.88005	0.0155188											14.423	69.383	1.10258	0.994386			163.105	5.092	12.4687	0.0729777										22.102	121.028	0.914895	0.940215			58.592	4.914
			19.908	94.732	1.09912	1.13963			42.701	7.46	2.35753	0.0897443											18.096	105.234	1.38337	1.5082			50.333	6.106	3.84775	0.0875102										21.642	121.493	0.895854	0.943828			26.956	16.973
			21.312	107.87	1.17664	1.29768			10.913	11.225	0.602509	0.135037											14.058	86.607	1.07468	1.24124			42.546	12.852	3.25247	0.184193										23.839	128.126	0.986797	0.995357			47.324	1.232
			16.788	75.346	0.926868	0.906417			183.779	1.556	10.1465	0.0187188											16.528	91.972	1.2635	1.31813			156.422	9.253	11.9578	0.132612										22.867	130.194	0.946562	1.01142			128.025	3.779
			24.212	131.102	1.33675	1.57717			124.174	5.082	6.85567	0.0611368											17.437	95.122	1.33299	1.36327			161.992	3.738	12.3836	0.0535724										22.93	112.606	0.949169	0.874788			183.348	5.571
			15.764	74.807	0.870333	0.899933			229.366	1.907	12.6633	0.0229413											16.7	94.428	1.27665	1.35333			61.102	6.65	4.671	0.0953067										21.839	120.474	0.904008	0.935912			20.562	3.07
			22.234	103.321	1.22754	1.24296			26.278	0.9	1.45081	0.0108271											16.521	86.418	1.26296	1.23853			99.747	2.803	7.62525	0.0401721										25.929	111.451	1.07331	0.865816			13.832	0.859
			22.264	110.449	1.2292	1.32871			186.636	4.478	10.3042	0.0538706											16.083	87.906	1.22948	1.25985			111.959	7.882	8.55881	0.112964										21.888	118.093	0.906037	0.917415			35.378	1.256
			19.153	91.498	1.05744	1.10073			16.321	4.086	0.901085	0.0491548											15.394	78.526	1.17681	1.12542			14.854	4.298	1.13553	0.0615982										28.304	143.219	1.17162	1.11261			14.744	4.646
			15.254	58.926	0.842176	0.708884			51.276	6.471	2.83096	0.0778466											15.529	82.313	1.18713	1.1797			15.002	5.523	1.14684	0.0791547										24.88	136.147	1.02989	1.05767			15.708	28.952
			18.774	93.179	1.03652	1.12095			59.267	6.682	3.27214	0.0803849											14.756	62.361	1.12804	0.893748			104.857	12.171	8.01589	0.174433										22.716	119.791	0.940311	0.930606			22.706	18.102
			12.32	41.948	0.680189	0.504637			9.528	1.851	0.526042	0.0222677											16.199	73.154	1.23835	1.04843			210.367	6.851	16.0817	0.0981874										19.647	103.26	0.813272	0.802183			22.264	10.209
			21.081	101.413	1.16389	1.22001			12.827	8.093	0.708181	0.0973593											15.615	76.773	1.1937	1.1003			92.593	10.218	7.07836	0.146443										27.855	151.697	1.15304	1.17847			86.037	0.681
			22.078	106.401	1.21893	1.28001			33.136	0.68	1.82944	0.00818044											15.044	72.133	1.15005	1.0338			156.326	7.872	11.9505	0.11282										26.32	133.544	1.0895	1.03745			152.278	8.223
			17.187	82.902	0.948897	0.997316			117.181	0.624	6.46958	0.00750676											13.939	59.08	1.06558	0.846725			158.687	10.694	12.131	0.153265										23.416	129.051	0.969287	1.00254			96.861	1.403
			19.223	84.881	1.0613	1.02112			10.342	11.312	0.570984	0.136084											15.412	86.636	1.17818	1.24165			197.203	2.174	15.0754	0.0311574										26.724	161.156	1.10622	1.25195			96.931	1.396
			15.906	72.25	0.878173	0.869172			12.757	24.497	0.704316	0.294701											15.887	89.195	1.2145	1.27833			157.042	9.575	12.0052	0.137227										25.122	135.994	1.03991	1.05648			13.127	2.985
			12.225	40.481	0.674944	0.486989			96.297	4.475	5.31657	0.0538345											14.425	70.631	1.10273	1.01227			199.498	3.849	15.2508	0.0551632										22.894	129.537	0.947679	1.00632			183.293	4.417
			14.287	47.423	0.788788	0.570502			45.264	6.405	2.49903	0.0770526											14.41	66.343	1.10159	0.950817			196.364	6.906	15.0112	0.0989756										23.917	134.838	0.990026	1.0475			65.914	1.35
			18.949	99.016	1.04618	1.19117			11.168	11.092	0.616587	0.133437											15.291	77.521	1.16893	1.11102			85.679	3.271	6.54981	0.0468794										27.106	152.135	1.12203	1.18187			254.737	1.018
			19.166	100.83	1.05816	1.21299			13.666	12.044	0.754502	0.14489											9.854	31.48	0.753298	0.451166			107.955	3.847	8.25272	0.0551346										22.131	111.039	0.916095	0.862615			88.251	1.539
			20.503	104.456	1.13197	1.25661			201.857	4.095	11.1446	0.0492631											13.673	71.82	1.04524	1.02931			202.706	9.907	15.496	0.141985										25.872	118.668	1.07095	0.921882			191.55	7.141
			17.084	81.276	0.94321	0.977756			33.736	17.824	1.86257	0.214424											13.639	76.375	1.04265	1.09459			114.247	7.677	8.73372	0.110025										25.703	133.844	1.06396	1.03978			34.625	18.547
			19.348	83.547	1.06821	1.00508			13.817	7.912	0.762839	0.0951819											12.217	48.646	0.93394	0.697186			217.499	7.352	16.6269	0.105368										20.881	102.984	0.864353	0.800039			13.722	5.251
			19.583	107.116	1.08118	1.28861			34.555	17.236	1.90779	0.20735											12.724	64.01	0.972698	0.917381			140.28	2.367	10.7238	0.0339235										25.012	137.126	1.03535	1.06527			90.236	4.204
			16.233	73.001	0.896227	0.878207			28.461	21.891	1.57134	0.26335											14.428	78.231	1.10296	1.12119			48.585	5.527	3.71412	0.079212										24.288	125.205	1.00538	0.972665			104.06	0.945
			15.161	69.113	0.837041	0.831434			46.029	7.126	2.54127	0.0857262											12.162	44.211	0.929735	0.633625			185.43	2.785	14.1754	0.0399142										22.167	113.043	0.917586	0.878183			14.568	3.845
			19.128	89.465	1.05606	1.07627			143.457	3.413	7.92028	0.0410586											14.605	77.581	1.11649	1.11188			80.976	3.11	6.19028	0.044572										22.201	113.578	0.918993	0.88234			55.429	4.4
			18.192	86.459	1.00438	1.04011			15.028	6.586	0.829698	0.07923											15.03	77.806	1.14898	1.1151			67.48	2.961	5.15857	0.0424366										23.524	145.535	0.973758	1.1306			24.846	26.037
			18.82	89.579	1.03906	1.07764			14.463	7.782	0.798505	0.093618											11.507	53.252	0.879663	0.763199			156.121	9.399	11.9348	0.134705										27.533	139.246	1.13971	1.08174			12.127	14.867
			20.157	94.512	1.11287	1.13699			137.707	0.884	7.60283	0.0106346											10.875	46.098	0.831349	0.660669			98.392	7.204	7.52167	0.103247										25.388	143.829	1.05092	1.11735			19.338	7.308
			18.877	88.283	1.0422	1.06205			181.68	0.642	10.0306	0.0077233											13.23	63.399	1.01138	0.908624			48.23	7.884	3.68699	0.112992										26.034	141.246	1.07766	1.09728			14.757	16.708
			21.575	94.226	1.19116	1.13354			111.954	1.227	6.181	0.0147609											13.821	67.696	1.05656	0.970208			132.613	4.537	10.1377	0.0650235										24.538	127.624	1.01573	0.991457			139.236	1.248
			15.703	73.967	0.866965	0.889828			12.917	7.183	0.71315	0.086412											15.143	68.367	1.15762	0.979825			153.27	4.732	11.7169	0.0678182										23.351	108.896	0.966596	0.845967			16.75	0.911
			19.879	99.746	1.09752	1.19995			36.197	2.431	1.99844	0.0292451											12.115	51.247	0.926142	0.734464			171.699	3.155	13.1257	0.0452169										20.2	104.416	0.836163	0.811164			73.759	0.972
			18.733	104.151	1.03425	1.25294			12.865	27.433	0.710279	0.330021											13.762	57.057	1.05205	0.817731			95.935	10.647	7.33384	0.152591										21.71	125.104	0.898668	0.97188			183.01	2.436
			17.195	64.278	0.949339	0.773269			15.899	7.476	0.877786	0.0899368											15.241	68.448	1.16511	0.980985			10.579	8.094	0.808721	0.116002										22.468	115.668	0.930045	0.898576			15.143	4.939
			20.295	95.599	1.12049	1.15006			107.424	5.718	5.9309	0.0687879											12.528	48.032	0.957714	0.688387			87.64	1.08	6.69972	0.0154784										23.072	119.32	0.955047	0.926947			18.249	1.829
			16.769	78.488	0.925819	0.944216			31.12	22.96	1.71814	0.27621											16.357	74.591	1.25043	1.06903			17.793	0.686	1.3602	0.00983164										22.553	131.713	0.933564	1.02322			37.114	1.381
			20.224	97.46	1.11657	1.17245			14.563	2.012	0.804026	0.0242045											11.77	57.224	0.899768	0.820125			195.903	6.542	14.976	0.0937589										24.116	125.49	0.998263	0.974879			46.518	1.626
			19.62	99.386	1.08322	1.19562			11.587	18.721	0.63972	0.225215											15.316	77.534	1.17085	1.1112			179.602	9.428	13.7298	0.135121										22.948	120.138	0.949915	0.933301			247.517	1.207
			17.188	76.636	0.948952	0.921936			26.408	12.338	1.45799	0.148427											13.009	62.617	0.994485	0.897416			12.142	5.465	0.928206	0.0783235										24.003	124.49	0.993585	0.96711			78.822	1.518
			19.519	97.184	1.07765	1.16913			13.033	0.959	0.719554	0.0115368											12.556	57.231	0.959855	0.820225			24.176	5.612	1.84816	0.0804303										25.797	146.17	1.06785	1.13553			110.102	1.599
			18.578	96.036	1.02569	1.15532			15.667	17.758	0.864978	0.21363											16.252	74.269	1.2424	1.06441			13.3	1.476	1.01673	0.0211538										22.577	106.499	0.934557	0.827346			13.787	11.315
			16.05	72.866	0.886123	0.876583			24.13	13.76	1.33222	0.165534											11.58	49.121	0.885244	0.703994			200.087	6.138	15.2958	0.0879688										24.702	114.891	1.02252	0.89254			32.683	27.904
			17.634	88.396	0.973576	1.06341			10.862	4.505	0.599693	0.0541954											15.697	70.645	1.19997	1.01247			47.071	6.111	3.59839	0.0875818										25.317	137.05	1.04798	1.06468			148.655	2.332
			18.787	99.45	1.03723	1.19639			49.292	8.603	2.72142	0.103495											11.108	45.55	0.849161	0.652815			29.644	3.454	2.26616	0.0495022										22.613	124.098	0.936047	0.964065			18.559	7.708
			20.031	110.885	1.10591	1.33395			31.226	1.225	1.72399	0.0147368											12.895	58.549	0.98577	0.839115			16.52	0.837	1.26289	0.0119957										25.42	121.37	1.05224	0.942872			27.803	35.039
			15.769	65.028	0.870609	0.782291			26.896	18.205	1.48493	0.219007											13.852	61.397	1.05893	0.879932			127.457	9.115	9.74357	0.130635										25.732	134.502	1.06516	1.04489			76.87	4.176
			15.071	69.877	0.832072	0.840625			26.058	11.588	1.43867	0.139404											12.51	55.507	0.956338	0.795517			159.719	8.635	12.2099	0.123755										24.953	124.877	1.03291	0.970117			42.782	0.785
			21.399	107.496	1.18144	1.29318			8.411	3.454	0.464373	0.0415518											12.365	55.697	0.945254	0.79824			36.804	0.578	2.81352	0.0082838										24.263	122.846	1.00435	0.954339			38.354	35.858
			16.199	67.943	0.894349	0.817359			10.802	15.564	0.59638	0.187236											13.529	59.888	1.03424	0.858305			219.807	5.58	16.8033	0.0799716										25.63	145.985	1.06093	1.1341			237.398	2.369
			19.969	101.776	1.10249	1.22437			7.784	7.119	0.429756	0.085642											13.81	67.95	1.05572	0.973848			13.068	0.886	0.998995	0.012698										21.719	110.277	0.899041	0.856695			190.257	1.668
			22.801	90.646	1.25885	1.09048			7.605	6.863	0.419873	0.0825623											17.025	92.931	1.30149	1.33187			27.999	0.564	2.14041	0.00808315										24.404	123.596	1.01018	0.960165			107.133	1.734
			17.778	86.453	0.981526	1.04004			28.27	19.071	1.56079	0.229425											15.116	77.049	1.15556	1.10425			188.364	2.498	14.3997	0.0358009										26.564	155.139	1.0996	1.20521			91.212	1.578
			17.245	75.527	0.952099	0.908595			21.51	16.086	1.18757	0.193516											16.486	87.732	1.26029	1.25736			33.455	8.915	2.5575	0.127768										21.441	103.627	0.887533	0.805034			29.121	6.166
			19.412	89.257	1.07174	1.07377			41.18	0.719	2.27355	0.00864962											16.59	87.938	1.26824	1.26031			18.207	4.47	1.39185	0.0640633										25.277	118.929	1.04632	0.923909			82.852	1.468
			22.249	111.272	1.22837	1.33861			14.614	13.884	0.806841	0.167025											16.836	80.585	1.28704	1.15493			231.661	7.264	17.7095	0.104106										27.178	164.513	1.12501	1.27803			14.368	1.441
			18.579	86.64	1.02575	1.04228			15.301	19.508	0.844771	0.234683											17.944	87.419	1.37175	1.25287			26.377	0.649	2.01641	0.00930136										25.314	145.646	1.04785	1.13146			8.028	7.621
			21.777	97.98	1.20231	1.17871			10.738	13.621	0.592847	0.163862											16.915	87.827	1.29308	1.25872			24.194	1.051	1.84953	0.0150628										23.515	127.688	0.973385	0.991954			28.554	3.698
			15.427	75.538	0.851727	0.908727			11.46	9.85	0.632708	0.118496											16.811	86.398	1.28513	1.23824			38.465	8.738	2.94049	0.125232										24.9	129.092	1.03072	1.00286			101.297	1.143
			19.524	88.959	1.07792	1.07018			20.418	6.603	1.12728	0.0794345											21.013	107.975	1.60636	1.54748			164.537	2.362	12.5782	0.0338518										26.852	151.83	1.11152	1.1795			13.716	3.682
			18.871	96.74	1.04187	1.16379			44.34	0.812	2.44802	0.00976841											18.789	103.574	1.43634	1.48441			25.515	3.429	1.95052	0.0491439										23.253	103.084	0.96254	0.800816			23.021	14.641
			21.002	102.807	1.15952	1.23677			11.27	6.29	0.622219	0.0756691											16.137	86.031	1.23361	1.23298			17.819	6.965	1.36219	0.0998212										27.379	148.64	1.13333	1.15472			48.086	8.694
			12.175	48.033	0.672184	0.57784			18.838	10.83	1.04005	0.130286											17.362	63.863	1.32725	0.915274			21.603	5.157	1.65146	0.0739093										24.257	128.388	1.0041	0.997392			17.713	1.635
			20.149	92.457	1.11243	1.11226			25.436	14.226	1.40433	0.17114											19.284	108.286	1.47418	1.55194			173.947	2.574	13.2975	0.0368901										25.783	134.764	1.06727	1.04692			127.803	1.292
			16.103	73	0.889049	0.878195			10.323	13.327	0.569935	0.160325											18.501	90.87	1.41433	1.30233			17.769	17.083	1.35837	0.244831										22.702	119.478	0.939732	0.928174			22.359	12.833
			17.671	86.867	0.975619	1.04502			11.045	8.769	0.609796	0.105492											12.505	40.715	0.955956	0.583521			18.466	0.833	1.41165	0.0119384										21.388	117.635	0.88534	0.913857			105.418	2.538
			6.5	13.896	0.358866	0.16717			28.486	1.023	1.57272	0.0123068											21.844	115.3	1.66988	1.65246			24.44	4.963	1.86834	0.0711289										24.905	134.281	1.03092	1.04317			16.563	0.866
			21.252	103.746	1.17333	1.24807			19.17	9.979	1.05838	0.120048											19.568	110.374	1.49589	1.58186			40.996	9.087	3.13398	0.130233										24.241	115.175	1.00344	0.894746			21.82	22.03
			16.531	77.74	0.912679	0.935217			10.681	7.476	0.5897	0.0899368											20.131	101.186	1.53893	1.45018			14.007	11.256	1.07078	0.161319										24.757	108.003	1.0248	0.83903			22.296	1.758
			19.831	98.256	1.09487	1.18203			192.063	3.319	10.6038	0.0399278											10.717	49.509	0.819271	0.709555			9.93	1.496	0.759108	0.0214404										22.125	113.789	0.915847	0.883979			97.076	1.529
			16.349	79.739	0.902631	0.959265			13.36	35.048	0.737608	0.42163											16.853	77.339	1.28834	1.10841			29.037	0.577	2.21976	0.00826947										25.843	163.423	1.06975	1.26956			70.327	1.714
			18.345	92.896	1.01283	1.11754			11.011	11.603	0.607919	0.139585											20.184	108.742	1.54298	1.55847			109.309	0.863	8.35623	0.0123684										28.44	119.13	1.17725	0.925471			16.055	21.642
			20.604	103.664	1.13755	1.24708			9.92	11.088	0.547685	0.133389											12.157	46.054	0.929353	0.660038			25.646	6.16	1.96053	0.0882841										25.52	131.472	1.05638	1.02135			40.403	21.156
			17.127	71.935	0.945584	0.865383			10.874	22.889	0.600355	0.275356											18.133	89.428	1.38619	1.28167			39.322	0.503	3.00601	0.00720891										21.152	99.77	0.875571	0.775071			47.322	1.46
			19.122	102.403	1.05573	1.23191			22.712	8.46	1.25393	0.101774											19.182	93.876	1.46639	1.34542			19.385	0.562	1.4819	0.00805449										22.666	124.735	0.938241	0.969014			100.321	2.441
			19.354	92.123	1.06854	1.10825			22.576	0.659	1.24642	0.00792781											19.341	88.386	1.47854	1.26673			50.021	0.75	3.8239	0.0107489										25.108	120.779	1.03933	0.938281			16.456	0.787
			21.914	109.558	1.20988	1.31799			6.754	1.286	0.372889	0.0154707											13.321	50.078	1.01834	0.71771			12.352	0.741	0.94426	0.0106199										23.139	117.336	0.957821	0.911534			43.03	1.34
			19.608	100.382	1.08256	1.2076			13.677	36.032	0.755109	0.433467											20.207	97.211	1.54474	1.39321			47.658	0.63	3.64326	0.00902906										24.939	144.885	1.03233	1.12555			19.477	2.027
			15.216	73.458	0.840078	0.883705			42.099	2.815	2.32429	0.0338646											11.068	42.653	0.846103	0.611296			14.023	0.839	1.072	0.0120244										25.4	116.202	1.05141	0.902724			20.207	4.087
			13.505	58.35	0.745613	0.701954			194.045	1.172	10.7133	0.0140992											18.935	89.346	1.4475	1.28049			29.167	0.615	2.2297	0.00881408										24.847	146.748	1.02852	1.14002			19.952	1.054
			18.241	85.952	1.00709	1.03401			5.728	0.433	0.316244	0.00520902											20.508	104.534	1.56775	1.49816			18.696	0.697	1.42923	0.00998929										24.956	131.449	1.03303	1.02117			29.765	3.499
			20.352	105.557	1.12364	1.26986			11.992	0.54	0.66208	0.00649624											18.66	98.044	1.42648	1.40515			16.186	9.444	1.23735	0.13535										22.988	109.382	0.95157	0.849743			65.303	1.375
			21.639	105.845	1.19469	1.27332			15.389	0.955	0.849629	0.0114887											19.273	103.937	1.47334	1.48961			22.922	5.042	1.75229	0.0722611										22.555	111.324	0.933647	0.864829			13.223	22.447
			20.016	91.38	1.10509	1.09931			10.214	7.506	0.563917	0.0902977											19.193	100.2	1.46723	1.43605			136.679	1.95	10.4485	0.0279471										26.121	152.679	1.08126	1.1861			113.697	1.021
			19.937	106.266	1.10073	1.27839			30.003	0.559	1.65647	0.00672481											19.906	93.905	1.52173	1.34583			40.782	12.902	3.11762	0.184909										25.301	136.602	1.04732	1.0612			39.259	3.662
			18.888	90.583	1.04281	1.08972			12.801	6.619	0.706745	0.079627											16.52	83.324	1.26289	1.19419			52.882	0.637	4.04261	0.00912938										22.111	107.028	0.915268	0.831455			21.365	6.674
			19.152	88.387	1.05739	1.0633			201.913	3.699	11.1476	0.0444992											21.982	107.117	1.68043	1.53518			32.419	10.609	2.4783	0.152046										27.927	135.706	1.15602	1.05424			21.962	3.648
			18.848	87.988	1.0406	1.0585			79.951	2.481	4.41411	0.0298466											18.082	90.2	1.38229	1.29273			26.801	0.466	2.04883	0.00667863										26.118	153.153	1.08113	1.18978			16	27.107
			18.213	100.701	1.00554	1.21144			10.791	6.888	0.595773	0.0828631											18.441	90.435	1.40974	1.2961			11.864	0.73	0.906954	0.0104622										22.363	108.637	0.925699	0.843955			51.273	3.539
			16.824	83.125	0.928856	0.999999			24.754	1.028	1.36667	0.0123669											19.765	84.694	1.51095	1.21382			88.006	1.024	6.7277	0.0146758										23.221	117.993	0.961215	0.916638			135.58	4.43
			15.79	79.333	0.871768	0.954381			11.424	2.706	0.630721	0.0325534											20.075	107.917	1.53465	1.54665			187.77	5.225	14.3542	0.0748838										23.56	131.973	0.975248	1.02524			18.325	1.008
			19.421	97.853	1.07224	1.17718			11.113	5.915	0.613551	0.0711578											18.062	97.801	1.38077	1.40167			12.94	1.034	0.98921	0.0148191										23.184	110.803	0.959684	0.860782			66.232	2.445
			20.094	102.916	1.10939	1.23809			13.765	0.598	0.759968	0.00719398											20.061	98.716	1.53358	1.41478			98.856	1.718	7.55714	0.0246221										25.034	130.128	1.03626	1.01091			21.034	0.927
			18.292	95.082	1.0099	1.14384			12.799	5.721	0.706635	0.068824											20.049	96.493	1.53266	1.38292			12.035	0.585	0.920026	0.00838412										28.023	145.211	1.15999	1.12808			93.759	5.556
			19.754	99.646	1.09062	1.19875			8.255	7.959	0.45576	0.0957473											20.523	103.317	1.5689	1.48072			33.654	1.182	2.57271	0.0169402										27.186	135.525	1.12534	1.05284			13.612	9.709
			16.506	83.341	0.911299	1.0026			18.38	0.474	1.01476	0.00570225											17.962	90.156	1.37312	1.2921			36.25	0.811	2.77116	0.0116231										27.137	134.239	1.12331	1.04285			70.258	1.03
			21.128	96.875	1.16648	1.16541			41.211	1.833	2.27527	0.0220511											18.846	84.231	1.4407	1.20718			31.492	0.512	2.40743	0.0073379										26.582	131.768	1.10034	1.02365			13.178	4.874
			18.634	84.719	1.02879	1.01918			16.021	1.711	0.884522	0.0205834											15.398	65.957	1.17711	0.945285			20.144	0.616	1.53993	0.00882841										14.828	53.458	0.613793	0.415293			16.854	27.031
			21.159	106.703	1.16819	1.28364			75.704	0.895	4.17963	0.0107669											14.411	66.252	1.10166	0.949513			59.233	1.883	4.52812	0.0269868										27.583	152.702	1.14178	1.18628			35.973	3.736
			20.487	108.854	1.13109	1.30952			15.318	5.637	0.845709	0.0678135											20.98	96.264	1.60384	1.37964			15.602	0.63	1.19271	0.00902906										30.446	156.608	1.26029	1.21662			43.119	2.125
			16.806	76.857	0.927862	0.924595			16.607	3.282	0.916875	0.0394827											18.732	105.043	1.43198	1.50546			16.157	11.076	1.23514	0.158739										17.844	74.416	0.738638	0.578106			19.947	0.962
			20.7	103.393	1.14285	1.24382			42.698	1.81	2.35736	0.0217744											20.865	109.683	1.59504	1.57196			11.98	0.974	0.915822	0.0139592										23.238	114.113	0.961919	0.886496			25.574	0.956
			13.83	44.534	0.763557	0.535747			20.562	0.728	1.13523	0.00875789											18.885	92.369	1.44368	1.32382			16.618	0.719	1.27038	0.0103046										18.76	72.339	0.776556	0.561971			14.198	8.945
			16.16	65.583	0.892196	0.788968			16.427	4.712	0.906937	0.0566857											17.143	83.665	1.31051	1.19907			37	1.206	2.8285	0.0172842										26.562	137.026	1.09951	1.0645			19.359	5.584
			21.767	104.597	1.20176	1.25831			16.726	2.327	0.923445	0.027994											18.083	96.179	1.38237	1.37842			46.646	0.66	3.5659	0.00945901										28.311	148.301	1.17191	1.15209			15.769	3.382
			16.04	76.646	0.885571	0.922056			9.666	10.603	0.533661	0.127555											18.278	84.099	1.39728	1.20529			13.363	0.687	1.02155	0.00984597										27.45	145.217	1.13627	1.12813			13.889	0.794
			21.17	106.161	1.1688	1.27712			13.055	2.629	0.720769	0.031627											16.471	71.809	1.25914	1.02915			14.185	10.146	1.08439	0.145411										22.475	116.126	0.930335	0.902134			51.109	7.705
			14.923	46.481	0.823901	0.559169			9.351	11.605	0.51627	0.139609											12.14	47.385	0.928053	0.679114			93.604	1.687	7.15564	0.0241778										28.706	139.847	1.18826	1.08641			17.236	0.712
			19.777	94.836	1.09189	1.14088			19.096	0.539	1.05429	0.00648421											19.22	92.436	1.46929	1.32478			12.218	0.608	0.934016	0.00871376										27.351	146.682	1.13217	1.13951			34.381	2.3
			19.597	102.376	1.08195	1.23159			50.561	1.174	2.79148	0.0141233											17.891	92.404	1.36769	1.32432			13.239	2.533	1.01207	0.0363025										25.358	141.191	1.04967	1.09685			18.069	4.89
			18.274	96.099	1.00891	1.15608			18.167	0.548	1.003	0.00659248											10.78	48.617	0.824087	0.696771			13.46	1.604	1.02896	0.0229883										27.408	133.632	1.13453	1.03813			16.711	23.933
			21.144	100.59	1.16736	1.2101			45.397	0.979	2.50638	0.0117774											17.891	90.07	1.36769	1.29087			35.381	0.613	2.70473	0.00878541										19.924	101.866	0.824738	0.791354			22.984	11.786
			17.477	90.486	0.964908	1.08855			41.048	0.909	2.26627	0.0109353											17.256	93.676	1.31915	1.34255			31.083	0.751	2.37617	0.0107632										25.578	154.426	1.05878	1.19967			91.253	2.031
			18.739	95.309	1.03458	1.14657			12.821	5.856	0.70785	0.0704481											15.769	70.938	1.20548	1.01667			10.729	0.574	0.820188	0.00822647										33.066	172.285	1.36874	1.33841			38.922	5.065
			19.45	91.19	1.07384	1.09702			51.29	1.168	2.83173	0.0140511											15.213	62.28	1.16297	0.892587			181.207	2.008	13.8525	0.0287783										27.758	139.306	1.14902	1.08221			40.733	1.344
			19.312	103.328	1.06622	1.24304			14.063	0.602	0.776421	0.0072421											19.97	96.574	1.52662	1.38408			154.397	2.657	11.803	0.0380797										24.119	121.392	0.998387	0.943043			48.757	1.647
			20.246	92.656	1.11778	1.11466			12.66	4.134	0.698961	0.0497323											15.86	76.203	1.21243	1.09213			21.524	0.393	1.64542	0.00563241										28.145	155.94	1.16504	1.21143			16.792	19.328
			21.221	104.291	1.17161	1.25463			13.098	5.579	0.723143	0.0671157											17.422	81.744	1.33184	1.17154			30.767	0.718	2.35201	0.0102903										30.724	184.633	1.2718	1.43434			30.062	0.784
			15.69	65.46	0.866247	0.787488			14.498	0.648	0.800437	0.00779548											18.435	91.811	1.40928	1.31582			17.572	6.49	1.34331	0.0930136										28.452	145.146	1.17775	1.12758			14.14	0.89
			17.05	83.209	0.941333	1.00101			25.071	0.466	1.38417	0.00560601											19.006	96.586	1.45293	1.38425			65.471	2.229	5.00499	0.0319457										30.923	162.911	1.28003	1.26559			19.624	3.928
			20.532	109.166	1.13358	1.31327			29.511	0.489	1.62931	0.0058827											17.848	85.559	1.36441	1.22622			136.268	1.985	10.4171	0.0284487										28.536	154.728	1.18123	1.20202			9.592	8.954
			18.096	91.926	0.999083	1.10588			15.381	13.772	0.849188	0.165678											17.86	99.669	1.36532	1.42844			27.865	0.522	2.13017	0.00748122										34.21	195.582	1.4161	1.51939			13.379	1.808
			19.77	96.182	1.0915	1.15708			15.867	0.741	0.87602	0.00891428											16.595	76.33	1.26862	1.09395			46.149	2.099	3.5279	0.0300825										30.728	172.081	1.27196	1.33682			17.384	6.411
			19.944	102.839	1.10111	1.23716			146.66	0.864	8.09712	0.010394											13.661	56.201	1.04433	0.805463			67.829	2.422	5.18525	0.0347117										26.353	184.312	1.09086	1.43184			22.114	4.314
			18.854	86.486	1.04093	1.04043			158.93	2.604	8.77455	0.0313263											18.56	99.876	1.41884	1.43141			12.171	25.293	0.930423	0.362495										24.242	111.243	1.00348	0.8642			18.597	26.746
			17.045	71.239	0.941057	0.85701			53.973	4.113	2.97986	0.0494797											18.111	89.897	1.38451	1.28839			185.597	1.722	14.1881	0.0246794										27.685	130.307	1.146	1.0123			15.921	27.373
			20.925	115.413	1.15527	1.38843			20.163	22.088	1.1132	0.26572											17.3	85.617	1.32251	1.22705			177.007	0.657	13.5315	0.00941602										29.411	156.82	1.21745	1.21827			69.237	1.39
			20.267	99.097	1.11894	1.19214			96.37	1.199	5.3206	0.014424											18.779	66.544	1.43558	0.953698			156.013	1.511	11.9266	0.0216554										29.349	152.684	1.21488	1.18614			43.565	3.101
			19.391	91.904	1.07058	1.10561			25.683	3.429	1.41796	0.0412511											18.463	84.296	1.41142	1.20812			18.238	0.581	1.39422	0.0083268										31.364	198.194	1.29829	1.53969			91.728	1.708
			20.745	89.82	1.14533	1.08054			21.642	1.858	1.19486	0.0223519											15.347	64.903	1.17322	0.930179			17.223	0.541	1.31663	0.00775352										29.357	148.721	1.21521	1.15535			39.771	3.004
			19.914	101.914	1.09946	1.22603			25.749	3.517	1.42161	0.0423097											17.733	79.124	1.35562	1.13399			67.565	1.038	5.16507	0.0148764										28.746	169.118	1.18992	1.31381			16.193	32.501
			20.899	117.524	1.15384	1.41382			10.827	11.772	0.59776	0.141618											18.945	92.568	1.44827	1.32667			188.986	1.55	14.4472	0.0222143										33.419	204.712	1.38335	1.59032			40.084	1.324
			17.627	79.995	0.97319	0.962345			12.527	3.672	0.691618	0.0441744											17.316	78.973	1.32374	1.13183			172.134	2.031	13.1589	0.029108										5.709	3.465	0.23632	0.0269181			20.107	5.21
			20.159	92.057	1.11298	1.10745			24.051	1.487	1.32786	0.0178887											16.353	69.052	1.25012	0.989642			234.436	0.699	17.9217	0.010018										28.37	150.072	1.17435	1.16585			18.036	13.277
			21.131	103.474	1.16665	1.2448			38.22	0.889	2.11013	0.0106947											15.672	66.572	1.19806	0.954099			122.936	0.678	9.39795	0.00971698										34.929	166.181	1.44586	1.29099			50.707	1.038
			15.503	66.708	0.855923	0.802502			12.6	10.455	0.695648	0.125774											19.185	89.52	1.46661	1.28299			77.375	0.714	5.915	0.0102329										32.019	177.619	1.3254	1.37985			29.249	0.589
			20.988	98.068	1.15875	1.17976			12.401	0.742	0.684661	0.00892631											16.774	69.564	1.2823	0.99698			158.219	0.503	12.0952	0.00720891										26.12	122.806	1.08122	0.954028			14.738	6.169
			14.32	74.498	0.79061	0.896216			159.002	2.428	8.77853	0.029209											17.316	84.918	1.32374	1.21703			31.212	0.595	2.38603	0.00852744										27.36	128.857	1.13255	1.00104			75.444	1.378
			19.439	98.449	1.07323	1.18435			163.245	1.482	9.01278	0.0178286											15.922	74.175	1.21717	1.06306			119.748	0.875	9.15424	0.0125404										29.736	149.24	1.2309	1.15938			15.842	8.353
			17.104	75.032	0.944315	0.90264			90.491	1.174	4.99602	0.0141233											22.329	103.706	1.70696	1.4863			29.557	0.466	2.25951	0.00667863										29.911	161.138	1.23814	1.25181			12.82	5.963
			19.187	106.418	1.05932	1.28022			15.051	0.594	0.830968	0.00714586											15.589	72.491	1.19172	1.03893			49.37	0.73	3.77413	0.0104622										23.226	113.404	0.961422	0.880988			16.641	22.435
			18.976	91.643	1.04767	1.10247			82.385	1.678	4.54849	0.0201865											17.217	90.066	1.31617	1.29081			98.305	0.692	7.51501	0.00991763										29.508	169.237	1.22146	1.31473			46.506	4.436
			22.05	117.798	1.21738	1.41712			17.375	0.451	0.959277	0.00542556											16.952	86.074	1.29591	1.2336			140.081	1.613	10.7086	0.0231172										24.011	106.462	0.993917	0.827058			13.681	7.46
			20.833	100.956	1.15019	1.21451			14.308	16.193	0.789947	0.194803											16.266	71.711	1.24347	1.02775			108.445	1.894	8.29018	0.0271445										28.06	135.06	1.16152	1.04922			43.244	1.988
			21.291	93.824	1.17548	1.12871			9.846	15.493	0.543599	0.186382											15.217	63.954	1.16328	0.916578			115.556	1.274	8.83378	0.0182588										25.147	109.238	1.04094	0.848624			23.704	4.467
			20.356	80.041	1.12386	0.962898			8.907	0.865	0.491757	0.010406											13.428	51.238	1.02652	0.734335			66.473	0.642	5.08159	0.00920104										31.699	200.73	1.31216	1.55939			9.595	5.511
			20.618	90.948	1.13832	1.09411			50.393	3.043	2.78221	0.0366075											12.391	45.878	0.947241	0.657516			27.923	0.545	2.1346	0.00781085										19.556	80.558	0.809505	0.625821			44.602	1.505
			18.494	84.882	1.02106	1.02114			15.262	17.672	0.842618	0.212595											16.782	83.291	1.28292	1.19371			108.736	1.306	8.31242	0.0187174										28.574	143.91	1.1828	1.11798			17.295	7.885
			16.008	70.263	0.883804	0.845268			12.532	13.171	0.691894	0.158448											18.094	91.264	1.38321	1.30798			116.771	1.182	8.92666	0.0169402										25.257	130.354	1.04549	1.01267			16.22	7.41
			20.12	96.645	1.11083	1.16265			99.41	1.208	5.48844	0.0145323											16.395	82.813	1.25333	1.18686			29.218	0.471	2.2336	0.00675029										30.122	161.896	1.24688	1.2577			69.318	1.12
			19.264	91.758	1.06357	1.10385			18.995	0.724	1.04872	0.00870977											15.879	79.833	1.21388	1.14415			128.044	0.824	9.78844	0.0118094										32.272	163.381	1.33587	1.26924			17.279	9.85
			19.959	102.558	1.10194	1.23378			113.955	2.275	6.29147	0.0273684											14.111	59.94	1.07873	0.85905			94.576	0.85	7.22995	0.0121821										19.802	71.351	0.819688	0.554296			14.094	3.197
			14.328	68.207	0.791051	0.820535			180.786	1.793	9.98122	0.0215699											15.592	72.707	1.19194	1.04202			140.69	1.151	10.7552	0.0164959										27.538	125.649	1.13991	0.976114			16.115	32.61
			16.223	68.016	0.895674	0.818237			15.88	6.348	0.876737	0.0763669											15.918	76.269	1.21687	1.09307			91.054	0.643	6.96071	0.00921537										31.513	164.465	1.30446	1.27766			13.317	8.728
			21.138	105.766	1.16703	1.27237			92.514	4.403	5.10771	0.0529684											2.974	1.015	0.22735	0.0145468			22.535	0.571	1.72271	0.00818348										27.924	142.883	1.15589	1.11			21.206	8.771
			19.069	101.31	1.0528	1.21877			38.858	0.444	2.14536	0.00534135											16.179	71.29	1.23682	1.02172			54.34	0.379	4.15407	0.00543177										25.138	140.019	1.04057	1.08775			14.942	11.727
			20.901	96.081	1.15395	1.15586			32.655	0.396	1.80289	0.00476391											15.789	60.64	1.207	0.869082			135.614	2.593	10.3671	0.0371624										26.891	144.307	1.11313	1.12106			19.612	12.758
			21.357	98.281	1.17912	1.18233			27.753	0.439	1.53225	0.0052812											15.159	61.701	1.15884	0.884288			67.45	0.612	5.15628	0.00877108										32.208	158.776	1.33322	1.23346			17.242	5.036
			21.338	98.708	1.17807	1.18746			89.573	3.083	4.94534	0.0370887											10.88	41.122	0.831731	0.589354			145.114	1.397	11.0934	0.0200216										29.158	142.056	1.20697	1.10357			21.388	7.902
			18.497	82.756	1.02122	0.99556			23.832	0.415	1.31577	0.00499248											19.069	97.167	1.45775	1.39258			19.109	0.63	1.4608	0.00902906										34.622	169.179	1.43315	1.31428			34.466	1.072
			20.255	89.25	1.11828	1.07368			12.322	1.675	0.6803	0.0201504											17.14	83.282	1.31028	1.19358			196.917	1.168	15.0535	0.0167396										27.758	140.33	1.14902	1.09016			50.937	1.264
			19.706	97.327	1.08797	1.17085			160.845	2.431	8.88028	0.0292451											14.082	62.575	1.07651	0.896815			61.915	0.679	4.73315	0.00973132										29.326	159.203	1.21393	1.23678			12.574	5.261
			16.964	71.402	0.936585	0.858971			32.763	0.366	1.80885	0.004403											16.454	86.085	1.25784	1.23376			119.296	1.861	9.11969	0.0266715										31.946	176.241	1.32238	1.36914			46.014	1.696
			16.295	65.251	0.89965	0.784974			11.633	1.559	0.64226	0.0187549											15.778	66.893	1.20616	0.958699			86.126	0.432	6.58398	0.00619135										27.79	152.445	1.15035	1.18428			13.386	5.871
			22.388	119.62	1.23605	1.43904			42.639	2.41	2.35411	0.0289925											17.876	83.698	1.36655	1.19955			154.742	1.025	11.8294	0.0146901										30.192	123.683	1.24977	0.960841			54.62	1.007
			18.027	84.258	0.995274	1.01363			34.541	0.372	1.90701	0.00447518											17.101	72.385	1.3073	1.03741			30.182	0.686	2.30729	0.00983164										34.804	182.275	1.44068	1.41602			17.204	33.91
			16.836	74.794	0.929518	0.899777			7.758	0.292	0.42832	0.00351278											17.794	80.699	1.36028	1.15656			44.287	0.734	3.38556	0.0105196										30.604	172.544	1.26683	1.34042			10.011	4.814
			17.584	89.976	0.970816	1.08242			13.21	23.862	0.729326	0.287061											16.732	81.705	1.27909	1.17098			45.291	0.632	3.46231	0.00905772										30.244	166.588	1.25193	1.29415			12.637	8.697
			16.742	72.978	0.924329	0.87793			31.25	4.339	1.72532	0.0521985											15.289	68.167	1.16878	0.976958			82.797	0.611	6.32949	0.00875675										28.612	148.678	1.18437	1.15502			58.966	1.568
			21.051	99.56	1.16223	1.19771			13.509	6.611	0.745834	0.0795308											14.211	65.45	1.08637	0.938019			61.504	0.641	4.70173	0.00918671										29.641	157.414	1.22697	1.22288			16.406	11.492
			17.757	88.896	0.980367	1.06942			93.713	3.229	5.17391	0.0388451											12.932	48.52	0.988598	0.695381			102.626	0.571	7.84534	0.00818348										36.032	178.831	1.49152	1.38926			20.695	10.477
			23.343	108.554	1.28877	1.30591			41.797	2.421	2.30762	0.0291248											15.001	65.585	1.14676	0.939953			95.882	0.766	7.32979	0.0109782										29.626	146.862	1.22635	1.14091			11.03	6.437
			19.819	98.969	1.09421	1.1906			161.739	1.262	8.92964	0.0151819											15.02	87.418	1.14822	1.25286			96.468	1.675	7.37458	0.0240058										31.12	183.762	1.28819	1.42757			19.479	7.71
			20.029	92.474	1.1058	1.11247			36.699	8.556	2.02616	0.102929											14.634	95.477	1.11871	1.36836			18.631	0.577	1.42426	0.00826947										27.936	135.244	1.15639	1.05065			68.676	0.86
			21.52	101.536	1.18812	1.22148			13.796	0.427	0.761679	0.00513684											15.198	89.049	1.16182	1.27624			87.647	0.757	6.70025	0.0108492										30.068	159.351	1.24464	1.23793			22.896	3.303
			16.034	69.758	0.88524	0.839193			42.214	0.726	2.33064	0.00873383											14.209	80.579	1.08622	1.15484			61.9	0.718	4.732	0.0102903										33.359	222.867	1.38087	1.73136			30.225	7.894
			18.688	87.667	1.03177	1.05464			22.918	0.639	1.26531	0.00768721											14.297	75.129	1.09295	1.07674			187.968	1.289	14.3694	0.0184737										28.981	164.428	1.19965	1.27737			17.939	6.159
			20.016	85.943	1.10509	1.0339			226.662	0.743	12.514	0.00893834											15.662	87.902	1.1973	1.2598			107.391	1.723	8.2096	0.0246938										27.76	133.274	1.1491	1.03535			17.627	8.742
			21.726	102.363	1.1995	1.23143			38.82	0.78	2.14326	0.00938345											12.605	66.837	0.963601	0.957897			34.514	0.72	2.63845	0.0103189										31.185	173.641	1.29088	1.34894			12.745	7.344
			18.571	88.149	1.02531	1.06044			12.55	17.424	0.692888	0.209612											14.275	84.964	1.09127	1.21769			59.231	0.802	4.52797	0.0114941										29.735	145.107	1.23086	1.12728			66.753	1.411
			17.666	91.481	0.975343	1.10052			31.8	0.732	1.75568	0.00880601											13.903	66.128	1.06283	0.947736			19.545	0.431	1.49414	0.00617702										35.45	210.709	1.46743	1.63691			75.945	7.242
			21.644	114.138	1.19497	1.37309			57.532	3.648	3.17635	0.0438857											15.96	95.148	1.22008	1.36365			38.89	0.554	2.97298	0.00793984										34.378	181.442	1.42305	1.40955			15.187	3.249
			16.175	76.238	0.893024	0.917148			46.954	1.271	2.59234	0.0152902											16.288	95.16	1.24515	1.36382			198.725	9.178	15.1917	0.131538										33.12	184.463	1.37098	1.43302			152.205	2.285
			19.564	87.274	1.08013	1.04991			12.229	31.341	0.675165	0.377034											14.166	79.563	1.08293	1.14028			160.919	1.619	12.3016	0.0232032										32.721	185.12	1.35446	1.43812			46.885	1.613
			19.618	86.687	1.08311	1.04285			20.8	1.591	1.14837	0.0191398											14.565	79.677	1.11343	1.14192			54.962	0.797	4.20162	0.0114225										30.707	195.214	1.27109	1.51654			39.342	0.997
			20.532	83.721	1.13358	1.00717			15.692	4.1	0.866358	0.0493233											15.151	81.766	1.15823	1.17186			15.232	0.459	1.16442	0.00657831										29.772	130.342	1.23239	1.01257			15.738	11.679
			20.274	89.062	1.11933	1.07142			55.224	0.633	3.04893	0.00761503											15.212	88.869	1.1629	1.27366			172.155	5.755	13.1605	0.0824797										25.9	122.177	1.07211	0.949142			45.151	12.802
			20.139	89.588	1.11188	1.07775			12.092	5.144	0.667601	0.0618827											13.429	69.353	1.02659	0.993956			192.198	6.121	14.6927	0.0877252										32.655	161.851	1.35173	1.25735			16.095	4.3
			16.05	74.933	0.886123	0.901449			157.16	1.74	8.67683	0.0209323											14.302	85.397	1.09333	1.2239			88.397	1.099	6.75759	0.0157507										31.626	175.618	1.30913	1.3643			16.056	9.041
			19.342	83.744	1.06787	1.00745			23.323	1.484	1.28767	0.0178526											14.436	68.091	1.10357	0.975869			181.212	1.597	13.8529	0.0228879										29.01	156.824	1.20085	1.2183			23.633	5.486
			17.57	86.906	0.970043	1.04548			14.166	15.429	0.782107	0.185612											13.498	67.832	1.03187	0.972157			217.221	1.743	16.6057	0.0249804										29.943	134.137	1.23947	1.04205			14.295	6.064
			16.839	76.496	0.929684	0.920252			12.918	2.806	0.713205	0.0337564											14.364	75.722	1.09807	1.08524			98.324	1.169	7.51647	0.0167539										30.454	163.837	1.26062	1.27278			28.999	3.616
			21.749	100.208	1.20077	1.20551			14.473	12.302	0.799057	0.147994											15.53	85.713	1.1872	1.22842			197.801	4.459	15.1211	0.0639056										29.891	172.67	1.23731	1.3414			16.32	17.351
			21.437	97.343	1.18354	1.17104			37.666	0.872	2.07955	0.0104902											13.068	73.28	0.998995	1.05024			162.599	6.012	12.43	0.086163										30.392	148.422	1.25805	1.15303			42.77	1.114
			19.036	85.449	1.05098	1.02796			114.216	2.113	6.30588	0.0254195											14.59	85.321	1.11535	1.22281			26.438	0.38	2.02108	0.0054461										31.247	166.359	1.29345	1.29237			19.008	5.198
			22.729	98.017	1.25487	1.17915			180.689	2.014	9.97587	0.0242286											13.567	75.958	1.03714	1.08862			86.349	1.407	6.60103	0.0201649										30.454	127.64	1.26062	0.991581			13.159	10.265
			18.387	93.279	1.01515	1.12215			25.622	0.598	1.41459	0.00719398											16.929	91.38	1.29415	1.30964			202.185	0.942	15.4562	0.0135006										32.075	200.269	1.32772	1.55581			77.945	1.444
			23.142	109.03	1.27767	1.31164			15.654	5.438	0.86426	0.0654195											14.664	80.954	1.121	1.16022			57.613	1.231	4.40428	0.0176425										33.487	188.014	1.38617	1.4606			15.44	7.017
			19.799	90.86	1.09311	1.09305			15.799	13.621	0.872265	0.163862											13.202	68.868	1.00924	0.987005			89.214	0.872	6.82004	0.0124974										32.37	165.86	1.33993	1.2885			25.389	2.154
			22.449	128.522	1.23941	1.54613			22.014	0.466	1.2154	0.00560601											15.834	78.116	1.21044	1.11955			117.142	2.15	8.95503	0.0308134										30.669	154.617	1.26952	1.20115			24.243	6.865
			19.741	84.248	1.0899	1.01351			122.307	1.211	6.75259	0.0145684											17.206	99.415	1.31533	1.4248			172.901	3.595	13.2176	0.0515229										32.814	160.57	1.35831	1.2474			49.501	3.003
			22.96	110.918	1.26763	1.33435			61.9	2.803	3.41751	0.0337203											14.886	78.4	1.13797	1.12362			190.144	4.877	14.5357	0.0698964										32.555	173.891	1.34759	1.35089			20.6	5.785
			16.114	75.284	0.889657	0.905671			36.373	0.503	2.00816	0.00605112											18.781	98.959	1.43573	1.41826			96.789	2.591	7.39912	0.0371338										32.256	154.799	1.33521	1.20257			46.156	1.811
			15.593	75.017	0.860892	0.902459			40.208	3.626	2.21989	0.043621											17.611	91.978	1.34629	1.31821			194.463	1.049	14.8659	0.0150341										36.724	197.655	1.52016	1.5355			18.312	0.654
			18.308	88.864	1.01079	1.06904			121.244	2.606	6.6939	0.0313504											15.83	83.731	1.21014	1.20002			17.265	12.352	1.31984	0.177027										30.008	171.634	1.24216	1.33335			85.639	1.162
			16.49	80.97	0.910416	0.974074			124.847	1.916	6.89282	0.0230496											14.481	84.143	1.10701	1.20592			72.453	1.319	5.53874	0.0189037										29.204	146.17	1.20888	1.13553			21.814	22.736
			18.517	78.66	1.02233	0.946285			83.52	0.87	4.61115	0.0104662											12.559	60.781	0.960084	0.871103			123.182	0.806	9.41676	0.0115515										28.643	161.602	1.18565	1.25542			15.765	13.038
			17.002	75.033	0.938683	0.902652			11.162	21.79	0.616256	0.262135											15.002	82.607	1.14684	1.18391			161.051	1.834	12.3117	0.0262846										29.316	145.554	1.21351	1.13075			28.248	1.535
			19.776	92.016	1.09184	1.10696			69.192	0.728	3.8201	0.00875789											16.212	88.552	1.23934	1.26911			145.858	2.621	11.1502	0.0375637										29.281	146.907	1.21206	1.14126			14.698	4.639
			22.596	130.335	1.24753	1.56794			21.05	19.163	1.16217	0.230532											16.169	90.697	1.23605	1.29985			103.822	1.246	7.93677	0.0178575										28.439	181.922	1.17721	1.41328			19.481	8.505
			18.872	84.699	1.04193	1.01893			15.284	8.781	0.843832	0.105636											13.591	76.761	1.03898	1.10013			115.815	1.255	8.85358	0.0179865										31.759	178.593	1.31464	1.38741			15.661	13.633
			16.519	66.959	0.912017	0.805521			41.279	7.51	2.27902	0.0903458											11.944	55.606	0.91307	0.796936			65.376	5.943	4.99773	0.0851741										29.594	158.32	1.22502	1.22992			31.868	6.506
			20.252	101.068	1.11812	1.21585			161.03	1.531	8.89049	0.018418											15.473	84.488	1.18285	1.21087			99.966	2.979	7.64199	0.0426945										30.064	140.73	1.24448	1.09327			18.947	25.671
			17.656	78.564	0.974791	0.94513			45.093	7.471	2.48959	0.0898766											17.557	96.68	1.34216	1.3856			169.649	3.649	12.969	0.0522969										33.148	180.62	1.37214	1.40316			13.808	8.769
			17.884	84.14	0.987379	1.01221			137.466	2.09	7.58952	0.0251428											16.236	90.808	1.24118	1.30145			104.173	0.938	7.9636	0.0134433										34.571	186.536	1.43104	1.44912			16.769	8.626
			18.754	82.561	1.03541	0.993214			11.66	2.1	0.643751	0.0252631											13.77	77.424	1.05266	1.10963			100.783	3.662	7.70445	0.0524832										26.773	103.887	1.10825	0.807054			20.116	21.172
			20.761	91.404	1.14622	1.0996			9.596	19.23	0.529797	0.231338											14.077	72.291	1.07613	1.03606			35.684	0.719	2.7279	0.0103046										35.549	184.826	1.47152	1.43584			19.721	13.43
			22.582	106.812	1.24676	1.28496			127.289	5.79	7.02765	0.0696541											14.848	73.966	1.13507	1.06007			124.848	1.317	9.54412	0.018875										32.165	179.31	1.33145	1.39298			15.459	15.066
			20.324	110.345	1.12209	1.32746			87.942	0.69	4.85529	0.00830075											13.239	69.571	1.01207	0.99708			146.327	1.396	11.1861	0.0200072										30.97	158.641	1.28198	1.23241			17.448	24.737
			17.709	89.98	0.977717	1.08247			22.448	15.263	1.23936	0.183615											12.511	60.216	0.956415	0.863006			127.363	3.27	9.73638	0.0468651										31.211	158.405	1.29195	1.23058			36.01	5.657
			17.12	81.914	0.945198	0.985431			11.368	20.207	0.627629	0.243092											15.101	84.024	1.15441	1.20422			182.853	1.341	13.9784	0.019219										28.353	141.551	1.17365	1.09965			20.9	6.864
			18.541	80.193	1.02365	0.964727			17.462	0.803	0.96408	0.00966014											15.93	84.557	1.21778	1.21186			137.455	2.842	10.5079	0.0407311										32.907	173.251	1.36216	1.34591			94.8	0.876
			18.002	78.356	0.993893	0.942628			154.724	1.635	8.54234	0.0196692											13.67	67.266	1.04502	0.964045			102.317	4.267	7.82172	0.0611539										32.43	166.844	1.34241	1.29614			16.457	2.731
			17.281	67.397	0.954087	0.81079			191.89	1.313	10.5943	0.0157955											14.206	76.705	1.08599	1.09932			203.111	1.811	15.527	0.025955										34.501	161.896	1.42814	1.2577			19.1	34.54
			19.379	90.805	1.06992	1.09239			10.169	9.335	0.561432	0.112301											13.614	73.693	1.04073	1.05616			189.184	1.57	14.4623	0.022501										32.584	175.184	1.34879	1.36093			16.953	29.239
			21.384	89.853	1.18061	1.08094			12.09	18.913	0.667491	0.227525											15.851	88.27	1.21174	1.26507			108.331	0.589	8.28146	0.00844145										25.617	144.38	1.0604	1.12163			22.842	19.697
			17.888	74.309	0.987599	0.893942			25.328	0.822	1.39836	0.00988871											15.113	76.496	1.15533	1.09633			68.172	5.361	5.21147	0.076833										32.225	159.827	1.33393	1.24163			18.062	4.236
			11.602	35.821	0.640548	0.430929			32.572	2.059	1.79831	0.0247699											14.744	76.151	1.12712	1.09138			22.836	3.989	1.74572	0.0571697										35.702	206.33	1.47786	1.60289			23.224	7.847
			20.688	99.11	1.14219	1.1923			10.111	1.62	0.55823	0.0194887											14.932	84.575	1.14149	1.21211			57.192	0.8	4.37209	0.0114655										32.525	170.946	1.34635	1.32801			16.769	13.735
			14.554	63.212	0.803529	0.760445			13.15	6.409	0.726014	0.0771007											12.587	62.918	0.962225	0.90173			169.15	1.445	12.9308	0.0207095										29.675	133.19	1.22837	1.0347			19.293	21.703
			19.147	98.304	1.05711	1.1826			10.333	8.97	0.570487	0.10791											14.825	83.2	1.13331	1.19241			150.145	4.896	11.478	0.0701687										26.635	133.39	1.10254	1.03625			15.964	4.522
			19.407	88.697	1.07146	1.06703			56.552	1.363	3.12225	0.016397											16.248	78.279	1.24209	1.12188			188.962	0.614	14.4454	0.00879975										36.702	210.017	1.51925	1.63153			16.417	9.333
			17.711	69.579	0.977827	0.83704			202.405	4.062	11.1748	0.0488661											14.766	82.85	1.1288	1.18739			129.367	3.96	9.88958	0.0567541										29.591	158.271	1.2249	1.22954			13.713	14.077
			21.433	94.652	1.18332	1.13867			210.352	3.939	11.6136	0.0473864											14.776	86.531	1.12956	1.24015			104.467	3.357	7.98607	0.048112										31.891	194.061	1.3201	1.50758			15.499	25.388
			18.015	82.348	0.994611	0.990652			58.981	4.57	3.25635	0.0549774											13.918	78.508	1.06397	1.12516			149.283	3.135	11.4121	0.0449303										31.622	177.264	1.30897	1.37709			18.658	10.353
			16.787	72.741	0.926813	0.875079			168.629	1.573	9.31003	0.0189233											15.718	79.948	1.20158	1.1458			165.194	5.627	12.6284	0.0806452										30.094	134.817	1.24572	1.04734			24.157	24.638
			23.221	112.696	1.28204	1.35574			37.869	8.656	2.09075	0.104132											13.838	75.51	1.05786	1.0822			56.986	6.406	4.35635	0.0918097										31.481	161.604	1.30313	1.25543			19.512	27.813
			20.641	88.307	1.13959	1.06234			67.927	0.635	3.75026	0.00763909											16.414	87.871	1.25478	1.25935			22.631	0.371	1.73005	0.00531711										28.392	134.792	1.17526	1.04714			6.242	1.516
			18.334	90.78	1.01222	1.09209			49.812	1.264	2.75013	0.015206											15.784	80.762	1.20662	1.15747			12.153	0.559	0.929047	0.0080115										33.274	176.291	1.37735	1.36953			21.486	6.597
			19.364	89.447	1.06909	1.07605			26.278	8.06	1.45081	0.0969623											14.181	74.065	1.08408	1.06149			168.608	2.084	12.8894	0.0298675										29.889	152.831	1.23723	1.18728			15.687	15.848
			16.32	70.844	0.90103	0.852258			54.002	4.631	2.98146	0.0557112											15.566	87.397	1.18996	1.25256			34.064	5.655	2.60405	0.0810465										31.859	163.451	1.31878	1.26978			12.308	8.032
			14.376	57.894	0.793701	0.696469			40.594	9.151	2.2412	0.110087											12.81	61.21	0.979272	0.877252			196.61	1.698	15.03	0.0243355										30.748	166.909	1.27279	1.29665			15.981	12.684
			21.209	110.444	1.17095	1.32865			100.874	1.22	5.56927	0.0146767											14.429	78.725	1.10304	1.12827			87.069	1.532	6.65607	0.0219564										33.728	174.134	1.39614	1.35277			26.784	6.007
			23.892	103.661	1.31908	1.24705			37.05	2.398	2.04554	0.0288481											14.457	82.845	1.10518	1.18732			100.859	3.646	7.71026	0.0522539										26.153	160.288	1.08258	1.24521			16.352	7.777
			18.739	75.59	1.03458	0.909353			21.048	5.992	1.16206	0.0720842											14.976	80.331	1.14485	1.15129			43.22	6.864	3.30399	0.0983737										28.406	149.762	1.17584	1.16344			81.311	1.014
			17.709	90.954	0.977717	1.09418			41.982	16.735	2.31783	0.201323											16.281	90.293	1.24462	1.29406			140.333	3.697	10.7279	0.0529848										32.521	168.142	1.34618	1.30622			8.605	4.729
			16.506	70.608	0.911299	0.849419			67.445	11.856	3.72365	0.142628											11.725	49.451	0.896328	0.708724			109.443	0.531	8.36647	0.0076102										20.584	89.86	0.852059	0.698084			15.558	15.483
			14.136	43.766	0.780451	0.526508			98.285	2.115	5.42633	0.0254436											13.917	79.81	1.0639	1.14382			37.928	11.383	2.89944	0.163139										31.143	137.171	1.28914	1.06562			24.85	0.809
			12.659	38.914	0.698905	0.468138			186.683	4.797	10.3068	0.0577082											14.632	75.539	1.11856	1.08261			132.976	2.524	10.1655	0.0361735										30.959	161.479	1.28152	1.25446			21.482	9.635
			19.643	94.423	1.08449	1.13591			100.113	2.38	5.52726	0.0286316											14.323	75.932	1.09493	1.08824			162.733	2.132	12.4403	0.0305555										27.023	141.815	1.1186	1.1017			75.086	0.994
			20.86	103.474	1.15168	1.2448			100.561	2.206	5.55199	0.0265383											13.419	62.19	1.02583	0.891297			197.431	0.68	15.0928	0.00974565										22.58	121.474	0.934681	0.94368			15.785	11.011
			21.008	97.475	1.15986	1.17263			9.494	12.66	0.524165	0.152301											15.562	82.017	1.18965	1.17545			55.573	0.564	4.24833	0.00808315										29.825	163.036	1.23458	1.26656			20.509	13.831
			17.743	75.402	0.979594	0.907091			110.72	2.075	6.11287	0.0249624											15.08	76.099	1.1528	1.09064			134.963	3.127	10.3174	0.0448156										30.407	167.362	1.25867	1.30016			12.726	7.234
			15.984	70.068	0.882479	0.842923			128.888	1.578	7.11593	0.0189834											14.71	69.584	1.12452	0.997266			208.662	0.58	15.9514	0.00831246										28.704	135.13	1.18818	1.04977			23.258	5.465
			18.355	79.087	1.01338	0.951422			50.701	1.021	2.79921	0.0122827											19.751	68.867	1.50988	0.98699			158.98	4.324	12.1534	0.0619709										28.7	168.135	1.18801	1.30617			30.759	1.181
			21.519	116.951	1.18807	1.40693			15.954	0.658	0.880823	0.00791578											13.424	73.02	1.02621	1.04651			32.183	0.467	2.46026	0.00669297										30.023	141.465	1.24278	1.09898			13.194	19.333
			22.293	112.674	1.2308	1.35548			142.647	1.373	7.87556	0.0165173											10.808	45.28	0.826227	0.648945			49.489	9.406	3.78323	0.134805										29.946	145.534	1.23959	1.13059			20.639	8.661
			14.454	47.968	0.798008	0.577058			136.946	0.803	7.56081	0.00966014											14.433	74.837	1.10334	1.07255			123.809	0.495	9.46469	0.00709426										27.9	140.925	1.1549	1.09479			36.983	0.692
			19.276	89.361	1.06423	1.07502			194.513	1.439	10.7391	0.0173113											14.663	78.932	1.12093	1.13124			20.088	0.417	1.53565	0.00597637										32.378	149.787	1.34026	1.16363			35.948	1.327
			15.96	68.857	0.881154	0.828354			9.323	2.427	0.514724	0.029197											14.539	67.44	1.11145	0.966539			167.997	2.972	12.8427	0.0425942										31.575	142.572	1.30702	1.10758			20.459	4.979
			18.88	86.961	1.04237	1.04615			47.425	0.66	2.61834	0.00793984											13.125	70.747	1.00335	1.01393			36.964	0.283	2.82575	0.00405591										32.644	199.222	1.35127	1.54767			14.95	39.267
			18.8	74.379	1.03795	0.894784			10.712	1.971	0.591411	0.0237113											14.941	73.732	1.14218	1.05671			116.677	0.565	8.91948	0.00809749										31.621	184.447	1.30893	1.43289			18.706	5.58
			21.172	101.045	1.16891	1.21558			22.053	0.64	1.21755	0.00769924											13.599	64.943	1.03959	0.930752			108.231	1.848	8.27382	0.0264852										26.31	139.667	1.08908	1.08501			14.697	8.852
			17.622	78.57	0.972914	0.945202			213.306	1.445	11.7767	0.0173834											15.151	78.192	1.15823	1.12063			38.388	0.408	2.93461	0.00584739										27.59	157.963	1.14207	1.22715			36.736	4.919
			17.365	70.653	0.958725	0.84996			146.509	1.476	8.08879	0.0177564											13.924	75.066	1.06443	1.07583			25.507	0.614	1.94991	0.00879975										31.721	165.197	1.31307	1.28335			15.095	20.329
			19.283	91.544	1.06462	1.10128			10.892	1.923	0.601349	0.0231338											14.104	76.368	1.07819	1.09449			116.799	0.791	8.92881	0.0113365										30.459	152.484	1.26083	1.18458			41.376	1.161
			19.773	78.893	1.09167	0.949088			31.006	0.753	1.71185	0.00905864											14.027	74.85	1.07231	1.07274			94.844	1.373	7.25044	0.0196776										35.055	184.392	1.45107	1.43246			15.388	0.821
			19.424	88.138	1.0724	1.06031			40.014	0.746	2.20918	0.00897443											14.446	80.714	1.10434	1.15678			142.755	0.606	10.913	0.00868509										32.19	180.495	1.33248	1.40219			17.624	5.964
			18.994	94.699	1.04866	1.13924			33.272	0.955	1.83695	0.0114887											9.17	38.388	0.701009	0.55017			174.397	6.037	13.3319	0.0865213										30.059	168.941	1.24427	1.31243			9.405	6.681
			16.642	72.373	0.918808	0.870652			12.469	1.003	0.688416	0.0120662											15.361	80.654	1.17429	1.15592			91.989	0.814	7.03218	0.0116661										32.138	185.519	1.33033	1.44122			13.589	1.847
			16.573	79.898	0.914998	0.961178			91.498	0.708	5.05162	0.00851729											16.219	84.8	1.23988	1.21534			38.144	0.464	2.91595	0.00664997										32.301	182.468	1.33707	1.41752			16.831	13.592
			18.538	97.349	1.02349	1.17111			20.636	0.484	1.13932	0.00582255											14.153	77.787	1.08194	1.11483			174.791	4.576	13.3621	0.0655825										34.575	181.844	1.43121	1.41267			14.242	15.531
			16.178	69.928	0.89319	0.841238			23.531	0.53	1.29915	0.00637593											8.598	36.865	0.657282	0.528343			58.865	0.308	4.49999	0.0044142										30.088	158.505	1.24547	1.23136			18.573	14.261
			21.132	98.847	1.1667	1.18914			38.277	0.394	2.11328	0.00473985											12.081	64.626	0.923543	0.926209			83.561	5.53	6.3879	0.079255										26.288	135.323	1.08817	1.05127			13.267	34.632
			18.958	78.842	1.04667	0.948474			17.147	0.408	0.946689	0.00490827											11.908	55.139	0.910318	0.790243			183.723	6.06	14.0449	0.0868509										30.103	151.332	1.24609	1.17563			14.691	18.599
			19.447	90.865	1.07367	1.09311			90.554	0.833	4.9995	0.010021											10.643	55.637	0.813614	0.79738			41.633	0.577	3.18267	0.00826947										29.221	151.814	1.20958	1.17938			14.269	3.115
			17.473	81.927	0.964687	0.985587			40.303	1.441	2.22514	0.0173353											11.186	61.519	0.855124	0.88168			12.515	8.344	0.95672	0.119585										30.535	142.975	1.26397	1.11071			13.103	18.789
			17.355	85.724	0.958172	1.03127			26.002	0.43	1.43557	0.00517293											11.128	65.607	0.85069	0.940269			13.98	8.013	1.06871	0.114841										28.286	145.997	1.17088	1.13419			14.861	13.707
			14.929	44.754	0.824233	0.538394			151.432	0.941	8.36059	0.0113203											12.691	74.22	0.970175	1.06371			25.225	0.517	1.92835	0.00740956										30.167	160.952	1.24874	1.25037			37.02	1.951
			18.454	80.231	1.01885	0.965184			13.051	0.439	0.720548	0.0052812											11.879	72.943	0.908101	1.04541			12.931	9.793	0.988522	0.140352										28.926	171.662	1.19737	1.33357			12.52	10.365
			18.356	86.755	1.01344	1.04367			23.123	0.457	1.27662	0.00549774											12.67	71.133	0.96857	1.01947			41.795	0.571	3.19506	0.00818348										26.547	130.864	1.09889	1.01663			13.664	2.471
			19.249	89.56	1.06274	1.07741			31.696	0.644	1.74994	0.00774736											14.918	94.085	1.14042	1.34841			16.461	22.071	1.25838	0.316318										26.121	140.625	1.08126	1.09246			17.679	0.828
			19.839	95.419	1.09531	1.1479			6.457	1.261	0.356492	0.0151699											11.049	53.383	0.844651	0.765076			14.356	23.132	1.09746	0.331524										25.265	131.714	1.04582	1.02323			15.971	3.152
			17.754	83.91	0.980201	1.00944			20.681	0.431	1.1418	0.00518496											12.88	76.93	0.984623	1.10255			32.298	0.826	2.46905	0.0118381										31.428	145.281	1.30094	1.12863			12.135	7.274
			20.542	97.22	1.13413	1.16956			63.016	0.467	3.47912	0.00561804											12.84	62.456	0.981565	0.895109			12.471	9.319	0.953357	0.133558										27.658	116.687	1.14488	0.906492			13.027	6.311
			19.978	104.144	1.10299	1.25286			115.022	4.887	6.35038	0.0587909											12.106	63.766	0.925454	0.913884			25.936	0.514	1.9827	0.00736656										27.824	149.194	1.15175	1.15903			15.566	16.151
			18.84	99.171	1.04016	1.19303			23.9	0.514	1.31952	0.00618345											14.81	84.774	1.13216	1.21497			30.989	0.821	2.36898	0.0117664										28.345	158.187	1.17332	1.22889			14.561	17.909
			19.639	103.302	1.08427	1.24273			89.265	0.764	4.92834	0.00919097											11.556	69.144	0.883409	0.99096			37.108	0.648	2.83675	0.00928703										29.78	149.51	1.23272	1.16148			15.865	5.183
			20.522	89.926	1.13302	1.08182			163.647	0.941	9.03498	0.0113203											12.639	73.971	0.9662	1.06014			34.391	0.466	2.62905	0.00667863										29.789	175.422	1.23309	1.36278			13.836	2.005
			18.47	93.636	1.01973	1.12645			109.334	0.958	6.03635	0.0115248											12.82	71.446	0.980036	1.02395			30.323	0.627	2.31807	0.00898606										29.009	163.475	1.2008	1.26997			22.488	8.963
			19.245	83.938	1.06252	1.00978			18.893	0.763	1.04309	0.00917894											14.704	85.715	1.12406	1.22845			25.272	0.524	1.93194	0.00750988										26.391	129.695	1.09243	1.00755			15.205	10.464
			16.288	69.474	0.899263	0.835777			47.291	1.838	2.61094	0.0221113											12.494	75.129	0.955115	1.07674			12.983	2.894	0.992497	0.0414763										25.331	144.147	1.04856	1.11982			13.952	10.697
			17.901	77.077	0.988317	0.927241			70.44	1.053	3.889	0.0126677											15.07	90.639	1.15204	1.29902			17.036	14.641	1.30233	0.209832										25.302	119.5	1.04736	0.928345			13.649	2
			17.986	68.68	0.99301	0.826225			100.376	1.384	5.54178	0.0166496											13.287	84.285	1.01574	1.20796			34.056	0.513	2.60344	0.00735223										28.997	166.646	1.20031	1.2946			52.017	0.812
			18.977	90.49	1.04772	1.0886			19.057	0.683	1.05214	0.00821653											12.266	70.285	0.937685	1.00731			81.113	0.804	6.20076	0.0115228										26.536	123.251	1.09844	0.957485			43.047	1.26
			18.661	82.575	1.03028	0.993383			144.835	1.883	7.99636	0.0226526											11.187	59.24	0.8552	0.849018			22.558	0.557	1.72447	0.00798283										26.603	131.307	1.10121	1.02007			13.963	21.684
			20.883	97.362	1.15295	1.17127			132.66	0.655	7.32418	0.00787969											12.947	77.824	0.989745	1.11536			15.516	27.989	1.18613	0.401134										30.217	149.796	1.25081	1.1637			13.635	12.965
			18.619	107.928	1.02796	1.29838			29.722	0.6	1.64096	0.00721804											7.596	40.919	0.580683	0.586444			14.389	12.867	1.09998	0.184408										26.993	122.321	1.11735	0.95026			29.615	0.867
			17.16	74.623	0.947406	0.89772			83.95	2.737	4.63489	0.0329263											13.008	70.459	0.994408	1.00981			15.254	4.435	1.16611	0.0635617										30.58	164.705	1.26584	1.27952			15.598	14.059
			17.597	78.785	0.971533	0.947789			57.118	5.514	3.15349	0.0663338											9.476	43.969	0.724401	0.630156			32.628	0.762	2.49428	0.0109209										26.484	119.79	1.09628	0.930598			19.376	11.692
			17.886	93.893	0.987489	1.12954			166.486	5.147	9.19172	0.0619187											14.181	80.67	1.08408	1.15615			27.998	0.547	2.14033	0.00783951										27.674	158.47	1.14554	1.23109			10.998	7.992
			19.884	100.485	1.0978	1.20884			30.307	0.522	1.67325	0.00627969											13.859	76.357	1.05946	1.09434			46.996	0.428	3.59265	0.00613403										29.813	180.533	1.23409	1.40248			19.096	22.6
			19.262	95.07	1.06346	1.1437			97.271	1.514	5.37035	0.0182135											12.878	74.635	0.98447	1.06966			44.948	0.412	3.43609	0.00590472										27.106	142.591	1.12203	1.10773			13.665	6.302
			18.335	87.75	1.01228	1.05564			107.297	4.75	5.92388	0.0571428											10.006	49.118	0.764918	0.703951			14.609	19.184	1.1168	0.274942										24.263	118.696	1.00435	0.922099			37.546	0.742
			20.247	93.276	1.11784	1.12212			14.432	2.011	0.796793	0.0241925											10.431	52.002	0.797407	0.745284			51.059	1.04	3.90325	0.0149051										26.712	143.785	1.10572	1.117			12.612	13.379
			20.659	97.175	1.14059	1.16902			92.497	1.481	5.10677	0.0178165											13.587	78.411	1.03867	1.12377			23.896	0.445	1.82675	0.00637767										26.441	141.775	1.0945	1.10139			13.928	3.876
			18.45	95.666	1.01863	1.15087			121.242	0.719	6.69379	0.00864962											12.42	70.37	0.949458	1.00853			14.651	3.121	1.12001	0.0447297										30.641	162.055	1.26836	1.25894			20.042	1.215
			21.081	103.049	1.16389	1.23969			50.039	2.528	2.76266	0.030412											11.908	62.386	0.910318	0.894106			58.245	0.766	4.45259	0.0109782										29.246	143.561	1.21062	1.11526			16.202	45.048
			19.712	89.423	1.0883	1.07576			19.556	0.465	1.07969	0.00559398											11.597	61.959	0.886543	0.887986			47.341	1.071	3.61903	0.0153494										25.66	109.412	1.06218	0.849976			22.019	0.894
			16.966	90.398	0.936696	1.08749			48.59	0.618	2.68266	0.00743458											12.344	67.012	0.943648	0.960405			27.517	0.436	2.10356	0.00624868										23.389	113.666	0.968169	0.883023			71.631	0.911
			18.109	84.993	0.999801	1.02247			120.882	4.016	6.67392	0.0483127											11.362	56.901	0.868578	0.815496			86.281	0.717	6.59583	0.0102759										25.839	118.262	1.06959	0.918728			14.417	11.14
			18.856	91.329	1.04104	1.09869			77.923	0.475	4.30214	0.00571428											12.276	65.84	0.93845	0.943608			47.265	0.622	3.61322	0.0089144										25.287	106.844	1.04674	0.830026			13.473	19.261
			4.766	10.717	0.263132	0.128926			112.108	0.559	6.1895	0.00672481											13.842	72.505	1.05816	1.03913			32.562	1.887	2.48923	0.0270442										27.281	128.495	1.12928	0.998223			14.282	18.261
			18.601	83.798	1.02696	1.0081			29.924	0.424	1.65211	0.00510075											13.361	67.713	1.02139	0.970451			46.096	1.538	3.52385	0.0220424										23.442	105.986	0.970363	0.82336			16.47	19.243
			18.178	84.455	1.00361	1.016			65.798	0.465	3.63272	0.00559398											11.385	60.288	0.870337	0.864038			15.881	34.628	1.21404	0.496283										29.942	150.811	1.23943	1.17159			58.598	0.68
			20.253	96.106	1.11817	1.15616			35.495	1.396	1.95968	0.016794											12.988	73.511	0.992879	1.05355			62.069	0.634	4.74492	0.00908638										24.957	132.699	1.03308	1.03088			22.264	8.342
			19.049	75.721	1.0517	0.910929			81.937	2.966	4.52376	0.0356812											14.05	90.746	1.07406	1.30056			13.119	17.836	1.00289	0.255623										28.985	132.664	1.19981	1.03061			15.834	42.103
			14.988	65.471	0.82749	0.78762			31.757	0.791	1.75331	0.00951578											12.71	65.025	0.971627	0.931928			23.608	0.426	1.80473	0.00610536										25.711	111.841	1.06429	0.868846			15.539	7.573
			20.761	100.884	1.14622	1.21364			44.74	1.587	2.4701	0.0190917											12.722	77.795	0.972545	1.11495			24.716	0.787	1.88944	0.0112792										22.398	107.358	0.927148	0.834019			16.372	21.841
			19.411	83.482	1.07168	1.00429			123.922	2.883	6.84175	0.0346827											12.338	66.07	0.94319	0.946904			24.908	0.903	1.90411	0.0129416										25.144	102.385	1.04082	0.795386			12.882	7.419
			19.308	95.838	1.066	1.15294			42.93	1.579	2.37017	0.0189955											11.102	57.504	0.848702	0.824138			19.99	0.49	1.52815	0.0070226										23.082	121.711	0.955461	0.945521			49.445	1.311
			19.969	97.693	1.10249	1.17525			31.769	0.486	1.75397	0.00584661											9.32	45.979	0.712476	0.658963			15.48	32.484	1.18338	0.465555										24.644	106.465	1.02012	0.827082			14.802	0.722
			21.741	101.321	1.20032	1.2189			32.254	1.183	1.78075	0.0142316											15.001	77.224	1.14676	1.10676			23.398	0.808	1.78868	0.0115801										24.941	114.832	1.03241	0.892081			17.883	24.288
			19.879	85.05	1.09752	1.02316			42.049	5.814	2.32153	0.0699428											13.207	70.675	1.00962	1.0129			25.125	0.549	1.9207	0.00786818										20.684	88	0.856198	0.683635			19.572	9.055
			20.258	98.097	1.11845	1.18011			30.74	0.983	1.69716	0.0118256											10.907	54.138	0.833795	0.775897			42.14	0.546	3.22143	0.00782518										23.203	106.283	0.96047	0.825668			90.44	2.903
			18.096	85.75	0.999083	1.03158			145.554	2.494	8.03606	0.030003											10.365	58.326	0.792362	0.835919			45.295	0.504	3.46262	0.00722324										25.547	127.581	1.0575	0.991123			16.05	21.733
			16.581	75.266	0.91544	0.905455			7.523	5.776	0.415346	0.0694857											12.349	68.682	0.94403	0.984339			44.207	0.591	3.37944	0.00847011										25.094	116.893	1.03875	0.908092			78.607	2.227
			20.079	84.303	1.10856	1.01417			168.19	0.933	9.2858	0.0112241											11.034	59.429	0.843504	0.851727			33.454	0.541	2.55742	0.00775352										23.555	127.36	0.975041	0.989406			16.101	27.426
			18.372	84.64	1.01432	1.01822			112.391	3.081	6.20513	0.0370646											13.98	66.801	1.06871	0.957381			58.823	0.738	4.49678	0.0105769										5.215	9.259	0.215871	0.0719293			21.914	9.702
			20.332	75.543	1.12253	0.908787			51.93	1.299	2.86706	0.0156271											12.737	73.554	0.973691	1.05416			16.928	6.63	1.29408	0.0950201										25.696	122.496	1.06367	0.95162			18.832	9.307
			19.816	87.468	1.09404	1.05225			9.977	1.186	0.550832	0.0142677											12.217	69.135	0.93394	0.990831			15.427	13.907	1.17933	0.199313										22.944	100.199	0.949749	0.778404			120.955	4.507
			18.715	90.682	1.03326	1.09091			54.296	0.627	2.99769	0.00754285											11.882	63.519	0.90833	0.910344			14.359	11.48	1.09769	0.164529										28.12	127.092	1.16401	0.987324			27.844	0.837
			18.311	87.39	1.01095	1.05131			83.201	0.813	4.59354	0.00978044											11.273	60.734	0.861775	0.87043			32.877	0.4	2.51331	0.00573273										23.2	89.538	0.960346	0.695583			39.843	1.743
			20.752	108.304	1.14572	1.3029			3.362	0.604	0.185617	0.00726616											12.612	68.189	0.964136	0.977273			18.176	0.542	1.38948	0.00776785										23.742	105.014	0.982782	0.815809			27.531	9.09
			19.431	81.48	1.07279	0.98021			47.044	5.436	2.59731	0.0653954											12.204	61.22	0.932946	0.877395			41.012	0.758	3.1352	0.0108635										30.553	171.498	1.26472	1.3323			22.97	72.006
			19.266	96.045	1.06368	1.15543			8.385	0.767	0.462937	0.00922706											12.482	62.142	0.954198	0.890609			22.877	0.442	1.74885	0.00633467										25.724	122.903	1.06482	0.954782			14.724	6.749
			22.127	98.472	1.22164	1.18462			6.554	0.615	0.361847	0.00739849											13.259	77.179	1.0136	1.10612			22.792	0.41	1.74236	0.00587605										25.645	135.752	1.06155	1.0546			19.537	9.519
			19.453	97.522	1.074	1.1732			34.87	4.139	1.92518	0.0497924											14.094	80.809	1.07743	1.15814			23.334	0.494	1.78379	0.00707993										24.511	107.986	1.01461	0.838898			39.334	1.355
			21.671	94.52	1.19646	1.13708			15.153	0.481	0.8366	0.00578646											11.342	56.721	0.867049	0.812916			17.96	0.541	1.37297	0.00775352										27.404	127.942	1.13437	0.993927			21.194	19.457
			19.211	80.091	1.06064	0.9635			30.889	0.646	1.70539	0.00777142											10.729	63.461	0.820188	0.909513			19.09	0.649	1.45935	0.00930136										23.733	108.924	0.982409	0.846185			17.516	22.98
			17.767	79.91	0.980919	0.961323			51.252	1.165	2.82963	0.014015											12.504	66.919	0.95588	0.959072			23.735	0.469	1.81444	0.00672163										29.744	147.711	1.23123	1.1475			15.688	18.348
			22.447	108.325	1.2393	1.30316			40.053	3.199	2.21133	0.0384842											13.181	85.557	1.00763	1.22619			43.51	2.515	3.32616	0.0360446										23.551	119.241	0.974875	0.926333			24.576	1.047
			22.044	90.054	1.21705	1.08336			185.465	1.516	10.2396	0.0182376											13.004	85.026	0.994103	1.21858			26.844	0.573	2.05211	0.00821214										23.079	123.96	0.955337	0.962993			172.535	9.101
			20.355	82.578	1.1238	0.993419			191.014	1.495	10.5459	0.0179849											12.337	66.874	0.943113	0.958427			8.772	3.134	0.670583	0.044916										26.607	125.476	1.10138	0.97477			44.023	1.314
			16.728	70.72	0.923556	0.850766			57.464	0.625	3.1726	0.00751879											12.011	78.162	0.918192	1.1202			37.962	0.679	2.90204	0.00973132										26.876	125.525	1.11251	0.975151			36.993	1.108
			17.546	73.331	0.968718	0.882177			15.83	11.248	0.873977	0.135314											14.724	86.699	1.12559	1.24256			29.617	0.452	2.2641	0.00647799										25.108	121.022	1.03933	0.940169			57.108	0.775
			19.877	96.414	1.09741	1.15987			44.667	1.065	2.46607	0.012812											10.353	51.769	0.791444	0.741945			32.997	0.471	2.52249	0.00675029										25.156	105.676	1.04131	0.820952			26.917	7.189
			21.792	105.259	1.20314	1.26627			20.489	0.746	1.1312	0.00897443											14.653	89.378	1.12016	1.28095			16.663	0.559	1.27382	0.0080115										24.473	123.527	1.01304	0.959629			98.352	20.843
			19.912	83.502	1.09934	1.00453			19.144	5.822	1.05694	0.070039											12.459	63.451	0.95244	0.909369			55.088	0.933	4.21125	0.0133716										27.487	132.1	1.1378	1.02623			19.203	9.563
			17.534	84.268	0.968055	1.01375			72.36	3.063	3.99501	0.0368481											13.111	67.133	1.00228	0.962139			66.617	0.531	5.0926	0.0076102										24.3	107.099	1.00588	0.832007			17.822	12.586
			19.726	88.552	1.08908	1.06529			6.195	0.289	0.342027	0.00347669											12.483	74.712	0.954274	1.07076			18.471	0.675	1.41203	0.00967399										24.25	105.154	1.00381	0.816897			16.936	11.329
			18.606	80.591	1.02724	0.969515			11.32	1.78	0.624979	0.0214135											13.607	73.398	1.0402	1.05193			40.277	0.709	3.07901	0.0101613										27.403	142.093	1.13433	1.10386			47.079	14.158
			19.113	78.97	1.05523	0.950014			16.618	0.409	0.917483	0.0049203											12.74	66.793	0.973921	0.957266			56.978	1.027	4.35573	0.0147188										25.818	122.379	1.06872	0.950711			29.318	1.104
			22.282	109.099	1.23019	1.31247			15.288	0.387	0.844053	0.00465564											13.204	70.308	1.00939	1.00764			54.273	1.079	4.14895	0.015464										27.538	133.35	1.13991	1.03594			63.888	0.937
			19.615	83.939	1.08295	1.00979			17.16	0.626	0.947406	0.00753082											13.448	80.944	1.02804	1.16008			13.401	2.556	1.02445	0.0366322										22.773	117.248	0.942671	0.91085			38.786	8.82
			17.369	81.881	0.958945	0.985034			9.608	6.701	0.530459	0.0806135											12.226	61.602	0.934628	0.88287			36.743	0.837	2.80885	0.0119957										24.718	115.236	1.02318	0.89522			91.214	1.276
			21.145	98.741	1.16742	1.18786			13.336	10.679	0.736283	0.128469											12.637	69.273	0.966047	0.992809			51.229	1.14	3.91625	0.0163383										22.639	112.266	0.937124	0.872147			21.057	78.205
			21.043	94.788	1.16179	1.14031			14.511	0.674	0.801155	0.00810826											12.758	74.381	0.975297	1.06602			30.215	0.402	2.30981	0.0057614										26.618	119.584	1.10183	0.928998			199.515	3.349
			19.317	96.023	1.06649	1.15516			38.445	0.489	2.12255	0.0058827											13.672	75.179	1.04517	1.07745			14.677	5.661	1.122	0.0811325										26.237	132.681	1.08606	1.03074			18.005	1.136
			19.588	88.734	1.08146	1.06748			30.607	0.731	1.68982	0.00879398											13.165	75.305	1.00641	1.07926			32.43	0.52	2.47914	0.00745255										26.255	130.173	1.08681	1.01126			213.425	8.111
			20.238	91.845	1.11734	1.1049			20.054	0.534	1.10718	0.00642406											11.465	62.279	0.876452	0.892572			17.549	0.634	1.34155	0.00908638										23.239	115.996	0.96196	0.901124			27.535	3.898
			17.858	73.202	0.985943	0.880625			32.951	0.516	1.81923	0.00620751											7.781	36.69	0.594826	0.525835			14.606	2.124	1.11657	0.0304408										26.659	135.291	1.10353	1.05102			18.548	15.689
			19.118	83.842	1.05551	1.00862			18.25	0.442	1.00759	0.00531729											11.403	65.753	0.871713	0.942361			36.494	0.678	2.78982	0.00971698										28.297	139.475	1.17133	1.08352			29.595	0.915
			19.45	80.742	1.07384	0.971332			67.23	0.633	3.71178	0.00761503											13.186	72.537	1.00802	1.03959			25.967	0.4	1.98507	0.00573273										23.153	118.645	0.9584	0.921703			174.387	16.397
			19.746	83.223	1.09018	1.00118			35.125	0.654	1.93926	0.00786766											13.223	78.128	1.01084	1.11972			118.503	2.013	9.05907	0.02885										29.217	155.587	1.20941	1.20869			22.355	1.671
			20.422	81.598	1.1275	0.981629			13.419	0.631	0.740865	0.00759097											12.456	67.72	0.95221	0.970552			18.118	1.72	1.38505	0.0246508										26.047	133.267	1.0782	1.0353			19.43	11.545
			21.475	85.189	1.18564	1.02483			9.637	1.338	0.53206	0.0160962											11.328	57.359	0.865979	0.82206			30.077	0.619	2.29926	0.00887141										22.079	124.492	0.913943	0.967126			39.42	6.497
			18.63	84.11	1.02857	1.01185			83.785	3.246	4.62578	0.0390496											12.433	63.92	0.950452	0.916091			30.057	0.628	2.29773	0.00900039										22.959	116.113	0.95037	0.902033			18.587	15.728
			21.034	82.652	1.16129	0.994309			36.407	1.187	2.01004	0.0142797											14.493	80.086	1.10793	1.14778			27.582	0.61	2.10853	0.00874242										26.125	140.102	1.08142	1.08839			14.084	8.838
			21.582	98.29	1.19155	1.18244			33.883	0.502	1.87069	0.00603909											11.91	63.788	0.910471	0.914199			62.162	1.088	4.75203	0.015593										27.507	121.946	1.13863	0.947347			88.444	3.5
			18.985	99.199	1.04816	1.19337			30.715	0.589	1.69578	0.00708571											11.224	71.851	0.858029	1.02976			14.434	2.916	1.10342	0.0417916										25.253	114.949	1.04533	0.89299			16.656	3.674
			21.277	92.832	1.17471	1.11678			57.264	0.438	3.16155	0.00526917											12.284	73.02	0.939061	1.04651			23.355	0.651	1.78539	0.00933002										26.201	140.805	1.08457	1.09385			48.128	6.064
			21.61	92.789	1.19309	1.11626			55.992	0.495	3.09133	0.00595488											14.21	78.4	1.0863	1.12362			18.348	0.888	1.40263	0.0127267										27.569	150.299	1.1412	1.16761			22.446	1.31
			17.564	75.714	0.969711	0.910844			29.206	0.466	1.61247	0.00560601											13.961	60.556	1.06726	0.867879			36.185	0.675	2.76619	0.00967399										28.222	152.175	1.16823	1.18218			88.33	7.988
			20.334	91.179	1.12264	1.09689			11.94	2.225	0.659209	0.0267669											14.22	81.832	1.08706	1.1728			31.695	2.486	2.42295	0.0356289										26.368	149.923	1.09148	1.16469			42.378	5.935
			23.271	109.092	1.2848	1.31238			45.572	0.546	2.51604	0.00656842											11.669	68.671	0.892047	0.984181			17.024	1.065	1.30142	0.0152634										22.619	109.173	0.936296	0.848119			239.394	10.597
			19.307	81.846	1.06594	0.984613			11.513	8.365	0.635635	0.100631											8.968	35.383	0.685567	0.507103			22.492	1.139	1.71942	0.016324										28.717	144.616	1.18872	1.12346			30.716	2.109
			18.894	82.396	1.04314	0.991229			42.133	0.432	2.32617	0.00519699											13.134	78.354	1.00404	1.12296			16.98	0.417	1.29805	0.00597637										29.246	156.812	1.21062	1.21821			203.827	7.153
			19.476	96.794	1.07527	1.16444			33.871	0.392	1.87002	0.00471579											13.614	72.285	1.04073	1.03598			13.734	1.641	1.04991	0.0235185										27.642	135.965	1.14422	1.05625			18.748	3.774
			20.01	87.09	1.10476	1.0477			25.447	0.43	1.40493	0.00517293											11.477	65.657	0.87737	0.940985			21.324	1.238	1.63013	0.0177428										25.113	116.891	1.03953	0.908077			237.659	11.044
			18.14	73.842	1.00151	0.888324			57.676	0.601	3.1843	0.00723007											12.881	71.547	0.9847	1.0254			13.24	2.006	1.01214	0.0287497										23.734	116.203	0.98245	0.902732			16.923	15.115
			19.231	83.215	1.06175	1.00108			25.842	1.039	1.42674	0.0124992											13.609	69.791	1.04035	1.00023			60.508	0.592	4.62559	0.00848445										24.468	113.408	1.01283	0.881019			237.434	10.68
			19.995	91.494	1.10393	1.10068			51.649	0.474	2.85155	0.00570225											14.637	77.868	1.11894	1.11599			68.202	0.876	5.21376	0.0125547										31.227	151.559	1.29262	1.1774			149.434	4.125
			18.669	76.642	1.03072	0.922008			22.435	0.46	1.23864	0.00553383											11.18	56.401	0.854665	0.80833			212.48	9.273	16.2432	0.132899										28.039	146.273	1.16065	1.13633			87.169	8.21
			19.023	87.159	1.05026	1.04853			68.481	1.293	3.78085	0.0155549											10.968	64.483	0.838459	0.92416			92.925	1.746	7.10374	0.0250234										26.812	146.522	1.10986	1.13827			14.746	6.144
			18.386	76.061	1.01509	0.915019			48.204	0.533	2.66135	0.00641202											10.207	49.945	0.780283	0.715803			150.984	2.163	11.5421	0.0309998										27.331	130.398	1.13135	1.01301			88.435	6.702
			19.054	81.317	1.05197	0.978249			17.577	0.652	0.970429	0.0078436											11.404	65.617	0.871789	0.940412			19.02	0.505	1.454	0.00723758										26.8	144.604	1.10937	1.12337			17.391	15.93
			21.57	102.365	1.19088	1.23146			30.689	0.485	1.69434	0.00583458											14.129	79.276	1.0801	1.13617			34.21	0.889	2.61521	0.012741										26.86	157.796	1.11185	1.22585			19.015	7.089
			21.072	85.103	1.16339	1.02379			13.265	7.625	0.732363	0.0917293											12.542	70.166	0.958785	1.00561			53.205	1.61	4.0673	0.0230743										32.312	155.496	1.33753	1.20798			25.227	1.87
			19.207	88.605	1.06042	1.06592			41.191	0.49	2.27416	0.00589473											12.708	70.226	0.971475	1.00647			172.572	1.947	13.1924	0.0279041										24	133.394	0.993461	1.03628			139.653	2.278
			17.585	69.382	0.970871	0.83467			62.143	0.466	3.43093	0.00560601											11.864	57.499	0.906954	0.824066			21.417	0.452	1.63724	0.00647799										30.678	165.068	1.26989	1.28234			23.672	1.051
			18.685	77.503	1.0316	0.932366			9.341	4.908	0.515718	0.0590436											11.494	59.174	0.878669	0.848072			97.014	1.831	7.41632	0.0262416										28.525	125.887	1.18077	0.977963			236.329	9.383
			16.258	63.518	0.897607	0.764126			37.071	1.475	2.0467	0.0177443											12.435	67.975	0.950605	0.974206			67.306	1.426	5.14527	0.0204372										24.133	109.159	0.998967	0.84801			65.108	12.663
			19.45	80.54	1.07384	0.968901			59.676	0.451	3.29472	0.00542556											11.862	61.421	0.906801	0.880276			28.107	4.866	2.14866	0.0697387										25.277	131.673	1.04632	1.02291			19.159	15.79
			17.601	73.431	0.971754	0.88338			77.446	0.899	4.27581	0.010815											12.584	72.591	0.961995	1.04036			112.387	2.956	8.59153	0.0423649										21.958	105.728	0.908934	0.821356			23.815	1.017
			22.428	101.803	1.23825	1.2247			38.751	0.504	2.13945	0.00606315											12.411	68.576	0.94877	0.98282			19.98	18.952	1.52739	0.271617										28.694	142.582	1.18777	1.10766			15.906	19.038
			23.774	111.482	1.31257	1.34114			30.898	0.669	1.70588	0.00804811											12.825	72.726	0.980419	1.0423			71.156	1.485	5.43958	0.0212828										32.046	170.83	1.32652	1.32711			122.878	2.132
			19.171	83.762	1.05843	1.00766			123.045	0.51	6.79333	0.00613533											11.051	64.62	0.844804	0.926123			117.652	2.581	8.99401	0.0369905										27.57	143.595	1.14124	1.11553			26.214	4.142
			21.503	85.205	1.18718	1.02502			13.087	5.437	0.722535	0.0654075											12.045	68.409	0.920791	0.980426			194.777	2.47	14.8899	0.0353996										29.097	142.504	1.20445	1.10705			20.057	4.603
			17.103	86.291	0.944259	1.03809			21.933	0.377	1.21092	0.00453533											10.437	57.17	0.797866	0.819351			101.272	0.696	7.74183	0.00997496										30.119	176.854	1.24675	1.3739			18.671	5.266
			21.585	96.395	1.19171	1.15964			164.778	2.115	9.09742	0.0254436											14.259	81.286	1.09004	1.16498			32.873	1.413	2.51301	0.0202509										29.128	148.066	1.20573	1.15026			29.45	1.791
			18.15	76.93	1.00206	0.925473			63.108	1.282	3.4842	0.0154225											13.665	70.176	1.04463	1.00575			15.781	17.801	1.20639	0.255121										26.103	135.476	1.08051	1.05246			31.659	13.904
			18.775	80.992	1.03657	0.974339			12.751	1.154	0.703985	0.0138827											12.196	68.221	0.932334	0.977732			106.002	2.316	8.10342	0.0331925										26.656	135.778	1.1034	1.0548			145.192	2.063
			19.916	83.533	1.09957	1.00491			9.534	0.829	0.526374	0.00997292											12.974	76.858	0.991809	1.10152			75.542	1.108	5.77488	0.0158797										27.239	158.675	1.12754	1.23268			15.882	4.153
			19.35	90.3	1.06832	1.08631			76.46	0.716	4.22137	0.00861353											10.84	47.224	0.828674	0.676807			107.694	2.226	8.23277	0.0319027										25.988	140.674	1.07575	1.09284			96.439	13.597
			17.637	75.142	0.973742	0.903963			40.238	1.49	2.22155	0.0179248											9.694	49.369	0.741067	0.707548			29.608	8.66	2.26341	0.124114										26.515	124.169	1.09757	0.964617			15.08	17.116
			20.163	82.255	1.1132	0.989533			53.724	0.451	2.96611	0.00542556											12.319	66.844	0.941737	0.957997			19.277	1.871	1.47365	0.0268149										29.177	158.543	1.20776	1.23165			231.809	8.595
			19.436	76.628	1.07306	0.92184			122.58	0.538	6.76766	0.00647218											12.112	55.365	0.925913	0.793482			15.956	18.117	1.21977	0.25965										28.612	157.27	1.18437	1.22176			24.549	4.409
			18.951	85.77	1.04629	1.03182			20.428	0.476	1.12783	0.00572631											11.675	61.985	0.892506	0.888359			63.85	3.858	4.88107	0.0552922										21.493	92.485	0.889686	0.718477			18.414	16.506
			19.637	91.442	1.08416	1.10005			19.719	0.853	1.08869	0.0102616											11.908	70.55	0.910318	1.01111			13.347	5.446	1.02032	0.0780512										32.193	156.368	1.3326	1.21476			133.153	1.468
			19.543	93.675	1.07897	1.12692			15.852	0.38	0.875192	0.00457142											12.311	67.794	0.941126	0.971612			148.359	10.687	11.3414	0.153164										28.065	147.572	1.16173	1.14642			18.228	4.365
			19.113	76.043	1.05523	0.914802			16.692	0.394	0.921568	0.00473985											10.362	50.394	0.792132	0.722238			38.179	10.83	2.91863	0.155214										23.399	112.254	0.968583	0.872054			80.598	2.147
			15.917	59.424	0.87878	0.714875			43.247	1.92	2.38767	0.0230977											12.076	71.235	0.923161	1.02093			13.333	5.092	1.01925	0.0729777										27.887	132.163	1.15436	1.02672			24.757	2.885
			16.45	60.774	0.908207	0.731115			18.301	0.615	1.0104	0.00739849											12.063	67.357	0.922167	0.965349			29.232	0.831	2.23467	0.0119098										24.135	103.725	0.999049	0.805796			15.196	10.171
			19.211	78.944	1.06064	0.949701			35.063	0.534	1.93583	0.00642406											11.472	66.321	0.876987	0.950502			73.956	18.827	5.65363	0.269825										29.904	152.842	1.23785	1.18736			174.883	7.246
			17.399	71.432	0.960602	0.859332			8.714	0.405	0.481101	0.00487218											11.865	64.578	0.907031	0.925521			47.86	35.185	3.6587	0.504266										30.529	154.217	1.26372	1.19805			183.268	3.873
			19.261	79.371	1.0634	0.954838			75.919	0.802	4.1915	0.00964811											10.484	54.157	0.801459	0.776169			125.868	1.549	9.62209	0.0222										29.475	155.447	1.22009	1.2076			23.577	4.575
			20.99	93.043	1.15886	1.11931			28.069	9.825	1.54969	0.118195											12.312	63.237	0.941202	0.906302			71.2	1.341	5.44295	0.019219										28.404	148.568	1.17576	1.15416			197.186	5.046
			19.829	84.203	1.09476	1.01297			42.115	1.819	2.32518	0.0218827											11.252	64.882	0.860169	0.929878			23.399	38.172	1.78876	0.547075										23.583	124.83	0.9762	0.969752			14.889	15.039
			20.251	94.567	1.11806	1.13765			49.196	1.426	2.71612	0.0171549											10.141	59.605	0.775238	0.854249			19.301	1.394	1.47548	0.0199786										27.354	112.58	1.1323	0.874587			174.384	3.711
			19.962	77.962	1.10211	0.937888			13.433	0.562	0.741638	0.0067609											10.471	61.009	0.800465	0.874371			26.989	0.458	2.0632	0.00656398										27.988	141.479	1.15854	1.09909			14.751	2.571
			17.264	84.289	0.953148	1.014			23.379	1.032	1.29076	0.012415											12.451	66.711	0.951828	0.956091			113.049	1.442	8.64213	0.0206665										26.88	140.559	1.11268	1.09194			21.05	12.487
			18.118	69.695	1.0003	0.838435			21.856	0.502	1.20667	0.00603909											11.061	62.71	0.845568	0.898749			63.724	17.739	4.87144	0.254232										25.012	112.537	1.03535	0.874252			18.614	7.852
			17.586	71.612	0.970926	0.861497			23.235	0.923	1.28281	0.0111038											12.29	66.177	0.93952	0.948438			46.13	1.132	3.52645	0.0162236										25.957	129	1.07447	1.00215			193.769	2.39
			17.768	75.562	0.980974	0.909016			104.759	1.825	5.78376	0.0219549											9.912	45.34	0.757732	0.649805			59.729	19.551	4.56604	0.280202										27.568	119.711	1.14116	0.929984			15.816	9.552
			18.021	74.413	0.994942	0.895193			34.724	0.663	1.91712	0.00797593											11.743	67.823	0.897704	0.972028			132.086	10.626	10.0974	0.15229										29.07	132.471	1.20333	1.02911			17.752	23.696
			18.52	82.504	1.02249	0.992529			23.872	0.957	1.31798	0.0115128											11.924	60.95	0.911541	0.873525			44.84	24.957	3.42783	0.35768										29.021	165.991	1.2013	1.28951			17.344	11.289
			20.567	88.891	1.13551	1.06936			15.494	12.432	0.855426	0.149558											10.588	50.04	0.809409	0.717165			23.332	0.44	1.78364	0.00630601										26.812	140.752	1.10986	1.09344			19.975	3.698
			17.522	66.761	0.967392	0.803139			13.139	1.478	0.725406	0.0177804											12.927	63.628	0.988216	0.911906			213.687	7.421	16.3355	0.106357										30.021	144.387	1.2427	1.12168			16.162	1.536
			18.614	72.294	1.02768	0.869702			102.731	0.544	5.6718	0.00654436											10.271	55.371	0.785176	0.793568			78.157	1.068	5.97478	0.0153064										27.871	151.767	1.1537	1.17901			15.005	1.01
			18.744	81.383	1.03486	0.979043			70.594	1.223	3.89751	0.0147128											11.469	66.124	0.876758	0.947678			63.918	3.999	4.88627	0.057313										28.866	133.409	1.19489	1.0364			23.633	6.135
			18.164	72.396	1.00284	0.870929			21.661	1.129	1.19591	0.0135819											10.287	50.773	0.786399	0.72767			51.761	9.047	3.95692	0.12966										28.172	138.905	1.16616	1.07909			12.016	8.548
			17.9	88.144	0.988262	1.06038			10.643	11.573	0.587602	0.139224											11.204	59.99	0.8565	0.859767			9.984	3.957	0.763236	0.0567111										28.107	136.884	1.16347	1.06339			50.253	6.87
			15.525	66.137	0.857138	0.795632			23.952	1.51	1.32239	0.0181654											12.088	68.709	0.924078	0.984726			140.718	2.79	10.7573	0.0399858										27.491	143.209	1.13797	1.11253			168.34	7.898
			17.524	84.02	0.967503	1.01077			53.508	0.847	2.95419	0.0101895											10.807	56.619	0.826151	0.811454			29.161	17.24	2.22924	0.247081										24.618	116.789	1.01904	0.907284			18.248	7.292
			17.206	75.337	0.949946	0.906309			114.261	1.405	6.30837	0.0169022											11.528	63.917	0.881268	0.916048			32.928	17.423	2.51721	0.249704										25.703	127.441	1.06396	0.990035			16.657	8.396
			14.976	58.085	0.826827	0.698766			25.864	0.984	1.42796	0.0118376											11.01	55.932	0.841669	0.801608			92.411	9.724	7.06444	0.139363										28.704	157.589	1.18818	1.22424			14.898	4.864
			18.611	73.62	1.02752	0.885653			19.749	1.253	1.09035	0.0150737											12.436	69.525	0.950681	0.996421			17.498	50.069	1.33765	0.717581										29.195	154.756	1.2085	1.20223			19.353	14.449
			19.582	84.143	1.08113	1.01225			45.929	0.783	2.53575	0.00941954											12.893	69.489	0.985617	0.995905			39.598	0.345	3.0271	0.00494448										27.202	158.276	1.12601	1.22958			62.416	1.561
			17.731	75.819	0.978931	0.912108			126.342	1.397	6.97536	0.016806											11.554	65.718	0.883256	0.941859			66.907	0.81	5.11477	0.0116088										27.324	145.785	1.13106	1.13254			35.671	5.952
			19.105	92.2	1.05479	1.10917			118.046	1.307	6.51734	0.0157233											11.401	71.433	0.87156	1.02377			23.395	16.545	1.78845	0.23712										26.431	138.728	1.09409	1.07772			24.119	3.582
			16.755	74.037	0.925046	0.89067			27.313	3.399	1.50796	0.0408902											9.443	49.463	0.721879	0.708896			101.467	1.435	7.75674	0.0205662										29.743	157.163	1.23119	1.22093			64.069	7.581
			17.975	76.343	0.992403	0.918411			22.586	0.437	1.24698	0.00525714											11.543	64.52	0.882415	0.92469			23.227	1.354	1.77561	0.0194053										29.395	144.036	1.21678	1.11895			20.335	13.271
			17.391	64.819	0.96016	0.779777			13.548	15.303	0.747987	0.184096											10.797	59.158	0.825386	0.847843			87.995	3.116	6.72686	0.044658										29.58	160.603	1.22444	1.24766			29.458	2.827
			18.118	68.284	1.0003	0.821461			110.642	1.776	6.10856	0.0213654											10.187	52.354	0.778754	0.750329			103.598	3.514	7.91964	0.0503621										30.164	151.947	1.24862	1.18041			16.97	11.773
			18.734	78.437	1.03431	0.943602			26.326	0.939	1.45346	0.0112962											10.627	63.434	0.812391	0.909126			28.247	19.21	2.15937	0.275315										31.655	218.07	1.31033	1.69409			23.133	12.96
			16.86	65.364	0.930843	0.786333			86.33	1.369	4.76629	0.0164692											10.878	63.87	0.831579	0.915374			131.858	1.328	10.08	0.0190327										30.605	147.054	1.26687	1.1424			159.748	2.6
			20.355	90.476	1.1238	1.08843			11.714	8.498	0.646732	0.102231											13.897	85.23	1.06237	1.2215			37.951	1.807	2.9012	0.0258976										30.592	146.174	1.26633	1.13556			16.559	14.316
			16.272	71.409	0.89838	0.859055			116.695	1.316	6.44275	0.0158316											12.204	70.81	0.932946	1.01484			29.137	15.118	2.2274	0.216669										28.955	138.819	1.19857	1.07843			169.33	2.445
			18.233	75	1.00665	0.902255			17.063	0.625	0.942051	0.00751879											12.675	72.4	0.968952	1.03762			85.474	3.896	6.53414	0.0558368										23.469	119.306	0.971481	0.926838			11.869	10.373
			20.25	81.505	1.11801	0.98051			8.801	4.798	0.485905	0.0577203											10.726	58.004	0.819959	0.831304			84.549	22.567	6.46342	0.323427										28.577	145.041	1.18292	1.12676			23.687	12.071
			12.579	53.611	0.694489	0.644944			20.739	0.514	1.145	0.00618345											9.576	54.117	0.732046	0.775596			61.358	1.908	4.69057	0.0273451										34.332	180.995	1.42115	1.40607			15.368	3.483
			18.205	82.229	1.0051	0.98922			11.776	7.539	0.650155	0.0906947											10.902	60.863	0.833413	0.872278			104.942	13.263	8.02239	0.190083										28.478	152.124	1.17882	1.18179			13.689	7.188
			18.722	90.019	1.03364	1.08293			33.583	0.523	1.85412	0.00629172											12.103	76.239	0.925225	1.09264			170.843	1.484	13.0602	0.0212684										30.941	158.999	1.28078	1.2352			23.634	4.446
			17.024	65.422	0.939898	0.787031			27.08	0.483	1.49509	0.00581052											11.489	67.631	0.878287	0.969276			137.144	4.044	10.4841	0.0579579										24.855	102.989	1.02885	0.800078			17.229	13.318
			17.723	75.952	0.97849	0.913708			47.382	0.595	2.61597	0.00715789											11.426	66.802	0.873471	0.957395			25.487	23.736	1.94838	0.34018										27.616	150.894	1.14314	1.17223			17.432	3.584
			17.565	73.137	0.969767	0.879843			16.673	0.421	0.920519	0.00506466											11.75	65.833	0.898239	0.943508			41.027	2.039	3.13635	0.0292226										26.857	136.177	1.11172	1.0579			15.62	10.795
			17.371	69.16	0.959056	0.831999			21.662	0.93	1.19596	0.011188											12.466	64.227	0.952975	0.920491			163.936	3.406	12.5322	0.0488142										28.798	147.406	1.19207	1.14513			19.374	12.819
			18.373	80.68	1.01438	0.970586			10.841	20.141	0.598533	0.242298											11.706	73.67	0.894876	1.05583			26.317	0.992	2.01183	0.0142172										30.873	160.39	1.27796	1.246			16.347	10.928
			18.198	80.914	1.00471	0.973401			38.837	0.503	2.1442	0.00605112											11.465	66.603	0.876452	0.954543			127.278	2.447	9.72988	0.03507										31.735	156.388	1.31365	1.21491			28.778	4.76
			19.872	84.712	1.09714	1.01909			38.939	0.802	2.14983	0.00964811											9.704	47.512	0.741831	0.680934			115.06	6.67	8.79587	0.0955933										25.166	119.92	1.04173	0.931608			16.624	7.502
			19.051	78.979	1.05181	0.950123			31.792	1.657	1.75524	0.0199338											10.67	60.166	0.815678	0.862289			76.445	1.408	5.84391	0.0201792										34.522	187.487	1.42901	1.45651			19.127	1.675
			19.038	80.444	1.05109	0.967747			26.516	1.157	1.46395	0.0139188											12.214	70.903	0.93371	1.01617			93.74	2.9	7.16604	0.0415623										28.432	170.042	1.17692	1.32098			20.346	6.569
			17.005	69.325	0.938849	0.833984			106.906	1.093	5.9023	0.0131489											9.344	47.824	0.714311	0.685406			43.788	2.047	3.34741	0.0293373										29.336	149.08	1.21434	1.15814			13.447	8.552
			18.377	76.161	1.0146	0.916222			40.899	1.056	2.25804	0.0127037											10.527	59.022	0.804746	0.845894			47.045	14.468	3.5964	0.207353										32.009	153.1	1.32499	1.18937			5.733	5.795
			19.157	87.772	1.05766	1.0559			8.499	1.543	0.469231	0.0185624											11.584	58.764	0.885549	0.842196			79.644	1.252	6.08846	0.0179435										29.465	155.884	1.21968	1.211			17.694	1.09
			18.606	79.032	1.02724	0.95076			18.144	0.569	1.00173	0.00684511											10.365	53.389	0.792362	0.765162			134.161	8.095	10.2561	0.116016										25.898	127.735	1.07203	0.992319			28.051	3.04
			17.06	78.441	0.941885	0.94365			13.106	2.538	0.723584	0.0305323											10.535	54.8	0.805358	0.785385			169.761	7.573	12.9775	0.108535										19.35	60.934	0.800978	0.473371			18.26	4.322
			18.37	75.126	1.01421	0.903771			104.042	1.143	5.74418	0.0137504											11.298	66.433	0.863686	0.952107			26.26	0.929	2.00747	0.0133143										29.149	141.569	1.2066	1.09979			19.314	10.004
			16.573	80.656	0.914998	0.970297			25.709	1.009	1.4194	0.0121383											11.737	68.627	0.897246	0.983551			59.235	19.679	4.52827	0.282036										25.207	119.995	1.04342	0.932191			17.337	12.712
			18.107	72.938	0.99969	0.877449			19.344	0.53	1.06799	0.00637593											12.276	71.48	0.93845	1.02444			27.909	4.141	2.13353	0.0593481										29.433	148.999	1.21836	1.15751			21.146	1.277
			16.756	73.04	0.925102	0.878676			68.997	0.831	3.80934	0.00999698											11.842	70.175	0.905272	1.00574			66.44	2.391	5.07907	0.0342674										30.549	139.556	1.26455	1.08415			42.335	1.406
			17.709	72.389	0.977717	0.870844			87.052	1.08	4.80616	0.0129925											9.437	50.087	0.72142	0.717839			16.668	11.942	1.2742	0.171151										28.294	133.238	1.17121	1.03507			16.279	13.92
			20.629	88.554	1.13893	1.06531			16.176	0.475	0.89308	0.00571428											11.017	61.809	0.842205	0.885836			67.098	3.947	5.12937	0.0565677										28.976	120.165	1.19944	0.933511			19.38	5.705
			15.321	56.121	0.845875	0.675139			17.32	0.606	0.95624	0.00729022											11.118	59.433	0.849926	0.851784			78.437	7.039	5.99619	0.100882										34.107	183.335	1.41183	1.42425			16.669	3.542
			18.144	77.139	1.00173	0.927987			21.623	0.558	1.19381	0.00671278											12.46	75.002	0.952516	1.07492			229.852	4.727	17.5712	0.0677466										16.015	57.006	0.662928	0.442856			22.546	3.529
			18.371	65.614	1.01427	0.789341			55.148	0.718	3.04473	0.00863759											11.47	73.163	0.876835	1.04856			29.784	19.495	2.27686	0.279399										32.467	166.178	1.34395	1.29097			19.9	3.645
			15.678	62.456	0.865585	0.75135			73.137	0.63	4.03791	0.00757894											10.937	62.077	0.836089	0.889677			189.335	7.83	14.4739	0.112218										28.396	167.811	1.17543	1.30365			19.727	31.171
			19.356	71.068	1.06865	0.854953			47.052	0.737	2.59775	0.00886616											11.373	71.044	0.869419	1.01819			199.744	4.79	15.2696	0.0686495										25.43	102.543	1.05265	0.796613			16.087	1.857
			16.706	70.174	0.922341	0.844198			37.818	0.478	2.08794	0.00575037											9.992	59.024	0.763847	0.845922			40.573	0.727	3.10164	0.0104192										32.219	190.122	1.33368	1.47698			15.642	17.712
			15.569	64.212	0.859567	0.772475			26.61	1.925	1.46914	0.0231579											11.24	64.397	0.859252	0.922927			39.078	13.341	2.98735	0.191201										30.959	169.441	1.28152	1.31632			24.542	1.332
			15.162	68.37	0.837097	0.822496			18.252	0.489	1.0077	0.0058827											12.245	74.14	0.93608	1.06256			149.636	1.552	11.4391	0.022243										28.581	144.861	1.18309	1.12536			38.529	1.258
			20.262	94.569	1.11867	1.13767			24.514	0.884	1.35342	0.0106346											12.742	72.547	0.974074	1.03973			123.43	2.977	9.43572	0.0426659										31.915	171.559	1.3211	1.33277			25.908	20.512
			17.946	81.365	0.990802	0.978826			18.81	0.505	1.0385	0.00607518											11.337	63.523	0.866667	0.910401			186.215	2.935	14.2354	0.0420639										32.837	195.865	1.35926	1.52159			16.558	1.833
			11.975	34.32	0.661142	0.412872			31.48	0.713	1.73802	0.00857744											11.073	63.964	0.846485	0.916721			211.227	4.724	16.1474	0.0677036										30.171	151.773	1.2489	1.17906			20.808	11.243
			21.451	90.5	1.18431	1.08872			15.274	0.475	0.84328	0.00571428											10.827	64.213	0.82768	0.92029			23.273	6.327	1.77913	0.0906775										27.554	145.63	1.14058	1.13134			15.007	5.843
			16.676	63.107	0.920685	0.759181			65.6	0.922	3.62179	0.0110917											12.404	69.025	0.948235	0.989255			123.464	2.968	9.43832	0.0425369										32.188	167.417	1.3324	1.30059			18.057	20.666
			18.273	78.146	1.00886	0.940102			80.213	1.22	4.42857	0.0146767											11.376	61.839	0.869649	0.886266			71.616	2.51	5.47475	0.0359729										27.692	141.302	1.14629	1.09772			14.784	19.688
			15.832	65.056	0.874087	0.782628			21.79	0.491	1.20303	0.00590676											12.874	73.717	0.984165	1.0565			31.178	7.78	2.38343	0.111502										27.76	143.516	1.1491	1.11492			14.227	15.489
			12.571	55.203	0.694047	0.664096			100.509	1.157	5.54912	0.0139188											10.962	58.855	0.838	0.8435			39.864	1.278	3.04744	0.0183161										29.861	145.963	1.23607	1.13392			22.659	1.421
			19.62	83.059	1.08322	0.999205			17.617	0.522	0.972637	0.00627969											12.595	71.902	0.962836	1.03049			169.245	1.872	12.9381	0.0268292										32.613	166.845	1.34999	1.29615			12.862	1.679
			16.344	78.496	0.902355	0.944312			33.826	0.495	1.86754	0.00595488											11.991	73.049	0.916663	1.04693			197.321	3.347	15.0844	0.0479686										25.981	136.703	1.07546	1.06199			22.316	1.313
			17.092	71.598	0.943652	0.861329			35.846	0.865	1.97906	0.010406											12.261	70.614	0.937303	1.01203			90.704	1.973	6.93395	0.0282767										32.143	185.352	1.33053	1.43992			10.49	2.421
			17.244	65.647	0.952044	0.789738			37.434	1.392	2.06674	0.0167459											10.508	58.46	0.803294	0.837839			82.511	1.739	6.30763	0.0249231										28.8	143.138	1.19215	1.11198			17.554	1.913
			19.71	93.609	1.08819	1.12612			28.072	0.432	1.54986	0.00519699											6.757	23.197	0.516545	0.332456			64.446	1.039	4.92663	0.0148908										28.21	154.417	1.16773	1.1996			20.379	8.545
			11.148	64.754	0.615483	0.778995			80.12	0.595	4.42344	0.00715789											10.85	64.858	0.829438	0.929534			12.413	25.837	0.948923	0.370292										33.496	168.439	1.38654	1.30853			15.432	15.406
			16.407	87.681	0.905833	1.05481			140.232	0.488	7.74223	0.00587067											10.961	65.025	0.837924	0.931928			44.156	11.328	3.37555	0.162351										28.292	145.795	1.17113	1.13262			17.1	16.925
			9.718	61.617	0.536532	0.741257			9.98	11.129	0.550997	0.133883											12.489	75.098	0.954733	1.07629			17.304	26.137	1.32282	0.374591										29.52	128.255	1.22196	0.996359			13.659	3.59
			14.523	80.395	0.801817	0.967157			90.85	1.099	5.01584	0.013221											11.108	61.866	0.849161	0.886653			129.515	2.449	9.90089	0.0350987										32.006	151.846	1.32486	1.17963			15.919	2.498
			9.248	31.824	0.510584	0.382845			21.402	0.691	1.18161	0.00831278											11.85	71.208	0.905884	1.02054			70.646	1.384	5.4006	0.0198353										16.969	73.427	0.702418	0.570423			28.855	2.242
			11.553	58.008	0.637843	0.69784			32.038	1.191	1.76882	0.0143278											10.469	56.909	0.800312	0.81561			82.824	4.916	6.33156	0.0704553										31.425	140.254	1.30081	1.08957			16.896	21.333
			11.735	68.294	0.647891	0.821581			22.077	0.675	1.21887	0.00812029											10.865	60.087	0.830585	0.861157			218.293	3.199	16.6876	0.0458475										28.303	131.165	1.17158	1.01897			208.113	19.461
			14.483	80.966	0.799609	0.974026			18.316	0.519	1.01123	0.0062436											12.634	76.415	0.965818	1.09517			19.682	10.835	1.50461	0.155285										31.085	153.736	1.28674	1.19431			26.488	0.813
			15.314	84.171	0.845488	1.01258			39.868	0.52	2.20112	0.00625563											12.099	74.892	0.924919	1.07334			33.194	0.509	2.53755	0.0072949										28.71	146.205	1.18843	1.1358			14.996	1.445
			12.729	69.999	0.70277	0.842093			101.575	16.311	5.60797	0.196222											10.438	64.491	0.797942	0.924274			61.405	2.131	4.69416	0.0305411										29.508	151.528	1.22146	1.17716			13.67	18.383
			14.85	84.968	0.819871	1.02217			26.627	0.944	1.47008	0.0113564											12.225	64.024	0.934551	0.917581			118.196	11.902	9.0356	0.170577										26.308	113.686	1.089	0.883179			18.539	5.128
			10.592	42.134	0.584786	0.506875			114.027	1.03	6.29545	0.012391											10.604	59.482	0.810632	0.852486			153.213	3.249	11.7125	0.0465641										26.685	135.588	1.1046	1.05333			16.922	25.199
			12.954	69.119	0.715192	0.831506			29.886	1.252	1.65001	0.0150616											11.382	67.103	0.870107	0.961709			43.395	0.424	3.31737	0.0060767										32.282	164.7	1.33629	1.27948			15.696	14.267
			16.985	88.862	0.937745	1.06902			38.638	0.601	2.13321	0.00723007											12.266	73.073	0.937685	1.04727			95.708	5.133	7.31648	0.0735653										34.13	171.632	1.41278	1.33334			19.444	10.218
			12.955	80.966	0.715248	0.974026			95.709	9.03	5.28411	0.108631											11.813	65.745	0.903055	0.942246			15.025	7.262	1.1486	0.104078										32.077	167.685	1.3278	1.30267			16.173	15.126
			15.63	86.472	0.862935	1.04026			73.744	11.839	4.07142	0.142424											12.701	81.532	0.970939	1.1685			196.959	3.296	15.0567	0.0472377										31.262	164.617	1.29407	1.27884			21.689	12.31
			15.874	81.698	0.876406	0.982832			75.036	2.41	4.14275	0.0289925											9.607	52.777	0.734416	0.756391			81.467	2.451	6.22782	0.0351273										31.473	155.779	1.3028	1.21018			17.413	17.435
			11.435	75.072	0.631328	0.903121			28.743	0.504	1.58691	0.00606315											10.368	65.402	0.792591	0.937331			30.687	8.208	2.3459	0.117636										12.916	70.058	0.534648	0.544251			15.198	20.894
			15.451	76.772	0.853052	0.923572			16.63	0.666	0.918145	0.00801202											12.413	69.749	0.948923	0.999631			93.136	2.489	7.11987	0.0356719										32.839	165.688	1.35934	1.28716			21.027	7.016
			17.705	97.665	0.977496	1.17492			65.94	0.956	3.64056	0.0115007											12.365	65.374	0.945254	0.936929			27.004	12.765	2.06435	0.182946										23.513	103.24	0.973302	0.802028			13.566	4.7
			9.253	59.622	0.51086	0.717257			109.564	18.036	6.04905	0.216974											8.673	45.987	0.663015	0.659078			12.767	9.073	0.975985	0.130033										24.573	116.905	1.01718	0.908186			17.516	23.14
			17.394	89.688	0.960326	1.07895			76.848	4.443	4.24279	0.0534496											13.242	72.897	1.0123	1.04475			160.871	3.637	12.2979	0.0521249										32.872	157.275	1.36071	1.2218			13.359	1.405
[truncated: 2,553 more rows]
[truncated: 42 more columns]

## Sheet: F6G
qPCR Analysis of posterior epiblast markers in hESCs cultured in various conditions in 2D
Units = relative increase (=POWER(2,ΔΔCt)
[truncated: 28 more rows]
