# Supplementary material for: An in vitro stem cell model of human epiblast and yolk sac interaction
Source: eLife. 2021 Aug 17;10:e63930. doi: 10.7554/eLife.63930 (PMC8370770; doi:10.7554/eLife.63930)
Supplement: Figure 7—figure supplement 1—source data 1. [file elife-63930-fig7-figsupp1-data1.xlsx]

## Sheet: F7FS1B
SOX1 level analysis in hESCs cultured in 3D in YSLC CM for 6 or 7 days
Unit= fluorescence intensity (a.u.)
	Day 6
																															Day 7
		Exp 1	29.4385	1			62.3865	2.11922			Exp 2	18.4077	1			40.8653	2.22001			Exp 3	8.3001	1			8.18452	0.986075						Exp 1	23.0116	1			13.774	0.59857			Exp 2	18.2329	1				13.0506	0.715774
		Control	SOX1	rel SOX1		+ YSLC CM	SOX1	rel SOX1			Control	SOX1	rel SOX1		+ YSLC CM	SOX1	rel SOX1			Control	SOX1	rel SOX1		+ YSLC CM	SOX1	rel SOX1						Control	SOX1	rel SOX1		+ YSLC CM	SOX1	rel SOX1			Control	SOX1	rel SOX1			+ YSLC CM	SOX1	rel SOX1
			25.307	0.859657			52.993	1.80013				10	0.543251			31.453	1.70869				9.324	1.12336			11.741	1.41456							22.864	0.993586			13.61	0.591441				20.908	1.14672				24.795	1.35991
			23.652	0.803438			63.935	2.17182				10.064	0.546728			32.998	1.79262				11.06	1.33251			7.858	0.946736							26.819	1.16546			4.902	0.213023				23.066	1.26508				22.326	1.22449
			23.229	0.789069			68.683	2.3331				14.275	0.775491			42.645	2.3167				7.915	0.953603			12.046	1.45131							28.603	1.24298			9.092	0.395105				14.968	0.820935				19.782	1.08496
			22.731	0.772152			82.739	2.81057				12.433	0.675425			31.962	1.73634				11.711	1.41095			9.713	1.17023							18.958	0.823845			11.859	0.515349				23.692	1.29941				17.834	0.978124
			23.352	0.793247			79.584	2.7034				9.7	0.526954			27.954	1.51861				12.101	1.45793			10.241	1.23384							29.346	1.27527			7.19	0.312451				23.716	1.30073				18.235	1.00012
			26.824	0.911188			64.777	2.20042				9.723	0.528203			35.891	1.94978				10.792	1.30023			10.074	1.21372							14.927	0.648673			13.447	0.584357				22.297	1.2229				17.661	0.968635
			26.656	0.905481			84.53	2.87141				9.063	0.492349			31.413	1.70652				14.749	1.77697			14.627	1.76227							33.916	1.47386			7.268	0.315841				17.474	0.958379				14.462	0.793183
			25.541	0.867605			54.659	1.85672				10.18	0.55303			36.563	1.98629				12.476	1.50311			11.668	1.40577							15.353	0.667185			9.235	0.401319				17.305	0.94911				21.254	1.1657
			26.96	0.915808			98.541	3.34735				10.159	0.551889			38.62	2.09804				11.473	1.38227			12.131	1.46155							22.047	0.958082			12.933	0.562021				16.862	0.924813				7.007	0.384306
			28.025	0.951985			83.298	2.82956				8.816	0.47893			34.749	1.88774				8.973	1.08107			3.849	0.46373							21.587	0.938092			13.436	0.583879				26.109	1.43197				15.814	0.867335
			25.548	0.867843			91.338	3.10267				6.099	0.331329			39.941	2.1698				17.114	2.0619			6.271	0.755533							22.777	0.989805			7.27	0.315928				15.664	0.859108				20.101	1.10246
			25.244	0.857517			69.598	2.36418				8.249	0.448128			42.254	2.29545				29.649	3.57213			5.512	0.664089							26.766	1.16315			7.372	0.32036				22.956	1.25904				17.857	0.979385
			28.464	0.966897			65.964	2.24074				9.172	0.49827			36.228	1.96809				11.383	1.37143			9.76	1.17589							22.734	0.987936			13.065	0.567757				23.575	1.29299				15.711	0.861686
			24.839	0.843759			63.359	2.15225				9.705	0.527226			41.688	2.26471				11.308	1.36239			10.757	1.29601							25.298	1.09936			24.615	1.06968				25.208	1.38256				8.684	0.476283
			21.093	0.716511			83.579	2.83911				9.009	0.489415			41.639	2.26204				10.267	1.23697			10.143	1.22203							24.822	1.07867			12.971	0.563672				22.156	1.21517				17.805	0.976533
			29.68	1.0082			18.207	0.618476				9.812	0.533038			40.412	2.19539				10.119	1.21914			10.224	1.23179							24.386	1.05973			15.862	0.689304				25.903	1.42068				16.111	0.883624
			23.514	0.79875			98.814	3.35662				9.51	0.516632			33.5	1.81989				12.848	1.54793			10.295	1.24035							23.09	1.00341			16.419	0.71351				27.828	1.52625				14.131	0.775029
			32.056	1.08891			79.132	2.68804				8.019	0.435633			32.94	1.78947				10.979	1.32276			9.954	1.19926							23.544	1.02314			20.802	0.903979				27.855	1.52774				17.307	0.94922
			26.095	0.886424			57.518	1.95384				10.175	0.552758			47.792	2.59631				12.669	1.52637			8.937	1.07673							19.911	0.865259			13.734	0.596829				30.377	1.66606				15.444	0.847042
			27.286	0.926881			73.583	2.49955				8.059	0.437806			56.278	3.05731				10.667	1.28517			7.442	0.896616							21.948	0.95378			11.8	0.512785				26	1.426				20.457	1.12198
			24.987	0.848786			30.062	1.02118				8.427	0.457798			55.141	2.99554				12.001	1.44589			10.144	1.22215							23.017	1.00023			14.4	0.625771				22.374	1.22712				18.954	1.03955
			20.368	0.691883			81.829	2.77966				10.938	0.594208			51.242	2.78373				10.416	1.25493			4.531	0.545897							24.449	1.06246			11.051	0.480236				26.524	1.45474				18.707	1.026
			24.219	0.822698			62.948	2.13829				11.276	0.61257			49.045	2.66438				12.147	1.46348			6.194	0.746256							22.577	0.981114			16.784	0.729371				27.507	1.50865				13.352	0.732304
			23.501	0.798308			26.221	0.890704				12.719	0.690962			53.029	2.88081				11.602	1.39781			8.87	1.06866							21.033	0.914017			9.342	0.405969				16.416	0.900352				18.33	1.00533
			21.6	0.733733			58.161	1.97568				11.157	0.606106			53.388	2.90031				11.962	1.44119			1.304	0.157107							21.127	0.918102			12.715	0.552547				21.5	1.17919				15.923	0.873313
			24.332	0.826537			63.921	2.17134				13.905	0.755391			53.619	2.91286				12.397	1.4936			4.972	0.599029							23.131	1.00519			18.684	0.811938				22.555	1.23705				17.677	0.969513
			21.182	0.719534			48.357	1.64264				9.658	0.524672			50.749	2.75695				17.368	2.09251			4.673	0.563005							25.981	1.12904			18.717	0.813372				13.578	0.744699				22.652	1.24237
			24.071	0.817671			50.724	1.72305				10.536	0.57237			51.29	2.78634				11.23	1.353			5.761	0.694088							24.804	1.07789			5.038	0.218933				34.141	1.8725				9.376	0.514236
			25.644	0.871104			78.407	2.66342				11.021	0.598717			57.424	3.11957				9.723	1.17143			4.148	0.499753							24.599	1.06898			15.255	0.662926				19.657	1.07811				18.675	1.02425
			23.639	0.802996			58.403	1.9839				7.754	0.421237			45.752	2.48548				10.985	1.32348			5.741	0.691679							27.085	1.17701			25.21	1.09553				22.284	1.22219				18.202	0.998307
			22.478	0.763558			62.011	2.10646				19.788	1.07499			68.202	3.70508				12.117	1.45986			5.745	0.692161							24.527	1.06585			5.677	0.246702				26.572	1.45737				12.266	0.672741
			20.851	0.70829			75.272	2.55692				12.53	0.680694			42.755	2.32267				12.476	1.50311			6.694	0.806497							27.058	1.17584			15.37	0.667924				19.003	1.04224				18.21	0.998746
			20.856	0.70846			63.572	2.15949				15.896	0.863552			64.038	3.47887				12.491	1.50492			5.345	0.643968							20.07	0.872169			10.264	0.446036				27.995	1.53541				20.839	1.14294
			25.118	0.853236			66.864	2.27131				9.726	0.528366			57.411	3.11886				11.482	1.38336			6.258	0.753967							24.846	1.07972			11.447	0.497445				37.245	2.04274				15.021	0.823842
			25.028	0.850179			65.132	2.21248				10.677	0.58003			56.085	3.04683				15.722	1.89419			6.08	0.732522							18.173	0.789732			12.724	0.552938				10.669	0.585152				19.059	1.04531
			24.391	0.828541			38.856	1.3199				15.381	0.835575			56.138	3.0497				11.632	1.40143			6.71	0.808424							18.323	0.79625			5.145	0.223583				24.064	1.31981				16.213	0.889218
			22.649	0.769367			75.863	2.577				13.559	0.736595			53.822	2.92389				14.97	1.80359			6.734	0.811316							28.644	1.24476			17.542	0.762311				24.194	1.32694				14.319	0.78534
			20.8	0.706558			16.268	0.55261				7.513	0.408145			55.292	3.00375				12.477	1.50324			5.264	0.634209							26.319	1.14373			22.614	0.982722				18.776	1.02979				17.308	0.949275
			25.834	0.877558			81.377	2.76431				13.888	0.754468			44.61	2.42344				12.694	1.52938			4.635	0.558427							24.995	1.08619			4.201	0.18256				20.33	1.11502				16.599	0.910389
			23.034	0.782445			55.467	1.88417				11.166	0.606595			49.833	2.70718				13.252	1.59661			5.941	0.715775							22.425	0.974508			15.712	0.682786				18.693	1.02524				6.954	0.381399
			24.022	0.816006			69.255	2.35253				10.357	0.562646			32.827	1.78333				13.668	1.64673			5.366	0.646498							24.402	1.06042			11.99	0.521041				19.401	1.06407				21.329	1.16981
			23.59	0.801332			48.636	1.65212				13.842	0.751969			60.63	3.29373				10.889	1.31191			5.67	0.683125							25.936	1.12708			28.628	1.24407				14.925	0.818577				9.246	0.507106
			22.317	0.758089			63.912	2.17103				10.305	0.559821			60.042	3.26179				13.61	1.63974			8.439	1.01674							22.274	0.967946			15.227	0.66171				18.993	1.04169				21.333	1.17003
			23.657	0.803608			59.597	2.02446				13.515	0.734204			49.583	2.6936				14.21	1.71203			5.557	0.66951							18.137	0.788168			14.056	0.610822				20.492	1.1239				13.324	0.730768
			21.309	0.723848			68.648	2.33191				11.972	0.650381			39.865	2.16567				10.876	1.31035			5.366	0.646498							27.169	1.18067			7.959	0.345869				18.741	1.02787				6.354	0.348492
			23.357	0.793417			16.438	0.558384				10.309	0.560038			46.452	2.52351				13.832	1.66649			5.287	0.63698							17.107	0.743407			10.123	0.439908				23.461	1.28674				21.521	1.18034
			23.077	0.783905			76.77	2.60781				9.1	0.494359			51.894	2.81915				12.235	1.47408			4.662	0.56168							25.879	1.12461			17.317	0.752533				22.224	1.2189				16.172	0.88697
			28.62	0.972196			57.892	1.96654				13.562	0.736758			48.796	2.65085				11.413	1.37504			4.381	0.527825							25.103	1.09088			15.575	0.676832				21.156	1.16032				18.964	1.0401
			21.267	0.722421			68.856	2.33898				10.977	0.596327			51.658	2.80633				11.306	1.36215			3.711	0.447103							20.1	0.873472			4.019	0.174651				16.436	0.901449				19.293	1.05814
			19.387	0.658559			70.398	2.39136				12.753	0.692809			26.192	1.42288				11.338	1.36601			6.565	0.790955							24.705	1.07359			18.437	0.801204				22.493	1.23365				15.139	0.830314
			23.953	0.813662			80.602	2.73798				10.79	0.586168			49.439	2.68578				12.495	1.5054			4.777	0.575535							21.222	0.92223			19.551	0.849615				20.532	1.1261				9.421	0.516704
			18.608	0.632097			47.941	1.62851				7.751	0.421074			56.21	3.05362				11.478	1.38288			4.439	0.534813							26.632	1.15733			28.069	1.21978				24.554	1.34669				11.467	0.628919
			19.551	0.66413			50.02	1.69914				6.955	0.377831			45.781	2.48706				10.702	1.28938			2.645	0.318671							19.944	0.866693			22.148	0.962471				19.995	1.09665				15.423	0.84589
			21.115	0.717258			65.784	2.23462				7.556	0.410481			65.929	3.5816				9.369	1.12878			5.451	0.656739							19.702	0.856177			9.683	0.420788				26.46	1.45123				15.516	0.850991
			21.858	0.742497			74.391	2.527				10.851	0.589482			28.728	1.56065				11.947	1.43938			4.953	0.59674							19.604	0.851918			11.64	0.505832				25.682	1.40856				11.772	0.645647
			20.031	0.680435			57.415	1.95034				8.422	0.457526			69.931	3.79901				10.314	1.24264			4.871	0.586861							16.171	0.702732			19.837	0.862043				18.241	1.00045				18.682	1.02463
			16.758	0.569255			75.903	2.57836				9.486	0.515328			64.291	3.49262				11.444	1.37878			6	0.722883							24.915	1.08271			4.849	0.21072				21.291	1.16773				11.78	0.646086
			22.047	0.748917			71.552	2.43056				8.78	0.476975			55.991	3.04172				11.847	1.42733			4.674	0.563126							19.232	0.835752			16.755	0.728111				18.102	0.992822				18.757	1.02875
			24.91	0.846171			59.08	2.0069				8.392	0.455897			66.423	3.60844				9.692	1.1677			5.497	0.662281							18.787	0.816414			15.332	0.666272				18.098	0.992603				10.205	0.559704
			24.903	0.845933			64.215	2.18133				8.615	0.468011			73.772	4.00767				11.678	1.40697			6.444	0.776376							12.843	0.55811			8.596	0.373551				20.747	1.13789				11.267	0.61795
			22.102	0.750786			81.56	2.77052				8.941	0.485721			40.547	2.20272				11.27	1.35782			8.414	1.01372							20.172	0.876601			22.141	0.962167				18.82	1.0322				17.127	0.939348
			24.571	0.834655			62.045	2.10761				9.589	0.520924			70.969	3.8554				10.544	1.27035			4.438	0.534693							18.773	0.815806			13.253	0.575927				24.676	1.35338				12.983	0.712066
			20.293	0.689335			55.205	1.87527				6.828	0.370932			67.687	3.67711				9.402	1.13276			4.058	0.48891							17.106	0.743364			8.415	0.365685				18.327	1.00516				16.939	0.929037
			21.226	0.721029			58.328	1.98135				10.308	0.559984			62.904	3.41727				8.952	1.07854			3.936	0.474211							20.803	0.904022			17.015	0.73941				23.056	1.26453				19.786	1.08518
			21.823	0.741308			79.378	2.6964				26.897	1.46118			58.107	3.15667				12.422	1.49661			3.072	0.370116							16.754	0.728067			16.512	0.717551				21.59	1.18413				16.282	0.893003
			21.568	0.732646			21.58	0.733054				28.122	1.52773			65.574	3.56232				11.587	1.39601			4.422	0.532765							16.105	0.699864			8.371	0.363773				19.342	1.06083				19.583	1.07405
			22.361	0.759584			44.852	1.52358				26.121	1.41903			43.419	2.35874				9.319	1.12276			3.139	0.378188							21.013	0.913148			21.248	0.92336				18.608	1.02057				16.972	0.930846
			19.707	0.669429			72.824	2.47377				27.365	1.48661			76.005	4.12898				8.773	1.05698			4.732	0.570114							15.525	0.67466			6.707	0.291462				17.791	0.975765				19.576	1.07367
			21.854	0.742361			68.537	2.32814				29.479	1.60145			62.879	3.41591				17.828	2.14793			5.212	0.627944							20.051	0.871343			18.269	0.793904				21.37	1.17206				17.243	0.94571
			23.865	0.810673			52.337	1.77784				25.317	1.37535			67.868	3.68694				20.505	2.47045			6.061	0.730232							20.635	0.896721			18.338	0.796902				23.274	1.27649				13.935	0.764279
			23.52	0.798954			61.868	2.1016				17.962	0.975788			65.052	3.53396				10.044	1.21011			4.678	0.563608							16.468	0.715639			5.673	0.246528				26.325	1.44382				12.995	0.712724
			18.731	0.636276			53.634	1.8219				24.749	1.34449			84.229	4.57575				10.111	1.21818			7.255	0.874086							25.19	1.09467			5.364	0.2331				22.84	1.25268				18.338	1.00577
			19.887	0.675544			66.555	2.26081				18	0.977853			71.758	3.89826				12.746	1.53564			7.495	0.903001							15.975	0.694215			10.653	0.46294				13.871	0.760769				13.422	0.736143
			24.829	0.843419			47.17	1.60232				15.679	0.851764			29.331	1.59341				10.056	1.21155			5.164	0.622161							18.364	0.798032			11.669	0.507092				25.992	1.42556				15.411	0.845232
			22.107	0.750955			73.625	2.50098				17.592	0.955688			12.841	0.697589				8.239	0.992639			7.046	0.848906							16.386	0.712075			7.788	0.338438				14.466	0.793402				18.883	1.03566
			22.303	0.757613			67.638	2.2976				20.025	1.08786			26.363	1.43217				7.997	0.963483			3.015	0.363249							19.78	0.859566			8.8	0.382416				14.038	0.769928				19.633	1.07679
			20.412	0.693378			76.617	2.60261				19.787	1.07493			30.932	1.68039				9.282	1.1183			5.384	0.648667							23.343	1.0144			14.281	0.6206				23.067	1.26513				23.985	1.31548
			18.935	0.643205			59.519	2.02181				19.006	1.0325			32.087	1.74313				8.719	1.05047			4.437	0.534572							21.736	0.944567			15.419	0.670053				23.075	1.26557				16.17	0.88686
			21.22	0.720825			42.304	1.43703				20.777	1.12871			20.414	1.10899				9.795	1.18011			2.776	0.334454							19.886	0.864173			17.829	0.774783				19.485	1.06867				14.823	0.812982
			20.242	0.687603			16.096	0.546767				17.252	0.937217			34.272	1.86183				9.485	1.14276			3.529	0.425176							18.337	0.796859			10.165	0.441734				19.664	1.07849				13.375	0.733565
			25.465	0.865024			59.249	2.01264				15.499	0.841985			41.77	2.26916				10.015	1.20661			4.45	0.536138							19.646	0.853743			7.936	0.344869				28.338	1.55423				15.611	0.856201
			25.29	0.859079			48.697	1.65419				17.322	0.94102			29.724	1.61476				11.627	1.40083			4.758	0.573246							24.179	1.05073			16.364	0.711119				19.205	1.05332				20.862	1.1442
			19.774	0.671705			74.262	2.52261				20.496	1.11345			36.536	1.98482				8.876	1.06939			3.159	0.380598							20.032	0.870517			17.586	0.764223				18.519	1.01569				14.578	0.799545
			19.755	0.67106			48.728	1.65525				20.421	1.10937			38.584	2.09608				9.41	1.13372			5.629	0.678185							19.448	0.845139			8.508	0.369726				14.441	0.792031				21.734	1.19202
			26	0.883197			69.159	2.34927				17.626	0.957535			27.904	1.51589				9.205	1.10902			3.208	0.386501							22.997	0.999365			12.835	0.557762				21.898	1.20102				19.315	1.05935
			24.299	0.825416			56.318	1.91307				20.495	1.11339			33.693	1.83038				9.945	1.19818			6.012	0.724329							20.156	0.875906			14.69	0.638374				24.009	1.3168				16.216	0.889383
			19.139	0.650135			71.26	2.42064				13.407	0.728337			9.075	0.493001				9.867	1.18878			3.765	0.453609							16.105	0.699864			16.634	0.722853				27.293	1.49691				18.815	1.03193
			26.51	0.900521			54.015	1.83484				13.47	0.73176			11.663	0.633594				14.634	1.76311			4.299	0.517946							17.132	0.744494			10.753	0.467286				22.225	1.21895				24.556	1.3468
			19.612	0.666202			79.597	2.70384				14.954	0.812378			8.824	0.479365				11.554	1.39203			4.67	0.562644							20.294	0.881903			15.786	0.686002				17.846	0.978782				20.54	1.12654
			24.492	0.831972			44.39	1.50789				11.574	0.628759			35.667	1.93761				8.127	0.979145			2.005	0.241563							11.803	0.512915			12.983	0.564194				18.636	1.02211				19.983	1.09599
			20.957	0.711891			81.513	2.76893				14.722	0.799775			44.739	2.43045				9.106	1.0971			3.543	0.426862							22.07	0.959081			18.647	0.81033				23.673	1.29837				17.072	0.936331
			25.149	0.854289			27.627	0.938465				15.796	0.85812			37.439	2.03388				9.434	1.13661			4.026	0.485055							19.907	0.865085			7.888	0.342784				17.12	0.938964				26.793	1.46949
			22.529	0.76529			54.128	1.83868				14.177	0.770168			33.164	1.80164				11.089	1.33601			3.379	0.407104							20.73	0.90085			14.16	0.615342				16.301	0.894045				23.967	1.31449
			20.665	0.701972			39.362	1.33709				15.721	0.854046			40.004	2.17322				9.199	1.1083			11.939	1.43842							19.862	0.86313			4.667	0.202811				9.109	0.499592				12.411	0.680694
			27.588	0.93714			80.97	2.75048				10.254	0.55705			31.781	1.72651				8.287	0.998422			9.304	1.12095							21.155	0.919319			16.437	0.714292				20.981	1.15072				19.229	1.05463
			20.307	0.689811			55.666	1.89093				14.487	0.787008			31.232	1.69668				10.976	1.32239			9.357	1.12734							17.86	0.77613			5.472	0.237793				25.195	1.38185				20.023	1.09818
			22.077	0.749936			18.342	0.623062				18.029	0.979428			28.045	1.52355				9.718	1.17083			1.917	0.230961							19.962	0.867475			15.035	0.653366				23.024	1.26277				19.74	1.08266
			19.309	0.65591			54.886	1.86443				20.907	1.13578			25.516	1.38616				13.828	1.666			4.186	0.504331							20.582	0.894418			16.492	0.716682				13.921	0.763511				15.406	0.844958
			24.344	0.826944			54.771	1.86052				21.42	1.16364			36.23	1.9682				11.676	1.40673			3.997	0.481561							18.626	0.809418			15.776	0.685567				18.558	1.01783				22.966	1.25959
			20.641	0.701157			90.247	3.06561				14.343	0.779186			24.329	1.32168				8.285	0.998181			6.035	0.7271							16.682	0.724939			16.292	0.707991				23.57	1.29272				21	1.15177
			18.164	0.617015			43.237	1.46872				14.21	0.77196			25.307	1.37481				12.103	1.45818			4.865	0.586138							18.521	0.804855			13.233	0.575058				24.998	1.37104				16.666	0.914064
			18.752	0.636989			43.766	1.48669				14.955	0.812433			24.295	1.31983				9.612	1.15806			8.996	1.08384							17.495	0.760269			6.878	0.298893				21.329	1.16981				21.692	1.18972
			25.033	0.850349			60.756	2.06383				16.011	0.8698			22.25	1.20873				10.746	1.29468			11.05	1.33131							19.28	0.837838			9.177	0.398799				23.669	1.29815				12.956	0.710585
			20.863	0.708698			30.019	1.01972				15.282	0.830197			27.721	1.50595				8.771	1.05673			9.156	1.10312							18.39	0.799162			11.054	0.480366				23.805	1.30561				11.69	0.64115
			19.103	0.648912			53.363	1.81269				16.017	0.870126			15.401	0.836662				9.136	1.10071			10.231	1.23264							20.647	0.897243			12.622	0.548506				21.533	1.181				10.939	0.59996
			17.022	0.578222			42.564	1.44586				14.386	0.781522			41.277	2.24238				9.568	1.15276			9.431	1.13625							17.771	0.772262			11.362	0.493751				18.487	1.01394				10.725	0.588223
			27.661	0.93962			83.819	2.84726				16.578	0.900602			35.635	1.93588				11.016	1.32721			9.364	1.12818							20.542	0.89268			16.644	0.723287				17.804	0.976478				9.592	0.526083
			16.974	0.576592			88.745	3.01459				10.439	0.5671			35.715	1.94022				9.582	1.15444			9.218	1.11059							16.007	0.695606			7.656	0.332702				27.521	1.50942				18.377	1.00791
			17.764	0.603427			46.471	1.57858				14.441	0.784509			26.74	1.45265				13.214	1.59203			9.427	1.13577							18.487	0.803377			18.974	0.82454				25.229	1.38371				18.365	1.00725
			24.913	0.846273			42.19	1.43316				16.704	0.907447			30.08	1.6341				9.326	1.1236			4.397	0.529753							16.003	0.695432			13.911	0.604521				23	1.26146				23.646	1.29689
			20.82	0.707237			70.832	2.4061				17.499	0.950636			42.72	2.32077				9.088	1.09493			6.275	0.756015							18.881	0.820499			12.142	0.527647				25.476	1.39726				16.771	0.919822
			25.362	0.861525			90.451	3.07254				15.62	0.848559			35.908	1.95071				9.286	1.11878			7.866	0.9477							14.878	0.646543			8.882	0.385979				17.621	0.966442				18.126	0.994139
			19.976	0.678567			32.029	1.088				17.33	0.941455			39.289	2.13438				8.447	1.0177			1.326	0.159757							15.538	0.675225			11.995	0.521259				20.04	1.09911				12.612	0.691718
			25.462	0.864922			42.634	1.44824				17.936	0.974376			24.592	1.33596				11.072	1.33396			4.128	0.497344							13.816	0.600393			11.401	0.495446				18.701	1.02568				13.339	0.731591
			19.086	0.648335			75.469	2.56362				15.116	0.821179			22.757	1.23628				10.282	1.23878			4.859	0.585415							19.582	0.850962			14.082	0.611952				18.199	0.998143				20.37	1.11721
			23.625	0.802521			51.677	1.75542				10.996	0.597359			45.445	2.46881				11.073	1.33408			5.785	0.69698							16.851	0.732283			15.254	0.662883				24.148	1.32442				14.133	0.775139
			25.113	0.853067			41.53	1.41074				16.691	0.906741			36.215	1.96739				8.176	0.985049			3.197	0.385176							18.715	0.813285			4.41	0.191642				18.219	0.999239				13.03	0.714644
			21.228	0.721097			21.056	0.715254				19.403	1.05407			43.918	2.38585				12.683	1.52805			4.743	0.571439							17.184	0.746754			18.748	0.814719				19.776	1.08463				18.587	1.01942
			16.006	0.54371			48.991	1.66418				17.125	0.930318			25.809	1.40208				9.95	1.19878			5.462	0.658065							15.199	0.660493			15.977	0.694302				18.878	1.03538				17.728	0.97231
			22.202	0.754182			28.588	0.971109				23.316	1.26665			28.422	1.54403				9.015	1.08613			6.748	0.813003							17.434	0.757618			12.16	0.528429				16.011	0.878139				20.091	1.10191
			24.347	0.827046			61.806	2.0995				18.136	0.985241			37.058	2.01318				8.6	1.03613			5.303	0.638908							17.591	0.76444			8.227	0.357515				22.017	1.20754				21.002	1.15188
			23.247	0.78968			66.491	2.25864				16.519	0.897397			29.64	1.6102				11.828	1.42504			5.944	0.716136							18.46	0.802204			13.588	0.590485				17.3	0.948836				16.854	0.924375
			26.01	0.883537			27.748	0.942575				19.632	1.06651			41.825	2.27215				10.308	1.24191			3.268	0.39373							17.826	0.774653			11.233	0.488145				16.023	0.878798				17.488	0.959147
			19.632	0.666882			29.675	1.00803				19.314	1.04924			30.448	1.65409				8.203	0.988302			6.232	0.750835							16.734	0.727198			12.285	0.533861				21.764	1.19367				12.332	0.676361
			25.326	0.860302			73.269	2.48888				7.764	0.42178			34.188	1.85727				10.964	1.32095			6.354	0.765533							15.028	0.653062			16.021	0.696214				14.94	0.819399				17.974	0.985802
			17.261	0.586341			33.281	1.13053				10.04	0.545424			24.09	1.30869				7.77	0.936134			5.901	0.710956							15.882	0.690173			16.472	0.715813				26.634	1.46077				21.791	1.19515
			22.782	0.773885			37.3	1.26705				16.346	0.887999			37.993	2.06398				8.887	1.07071			4.198	0.505777							16.093	0.699343			17.806	0.773783				18.296	1.00346				23.621	1.29552
			22.423	0.76169			67.021	2.27664				15.759	0.85611			20.696	1.12431				16.238	1.95636			4.778	0.575656							16.344	0.71025			11.91	0.517565				28.869	1.58335				21.827	1.19712
			19.25	0.653906			50.036	1.69968				14.502	0.787823			33.988	1.8464				10.861	1.30854			5.588	0.673245							16.657	0.723852			6.587	0.286247				29.713	1.62964				18.643	1.02249
			15.848	0.538343			51.035	1.73361				13.16	0.714919			26.382	1.43321				7.909	0.95288			4.663	0.561801							16.498	0.716943			12.694	0.551635				22.485	1.23321				17.255	0.946368
			15.943	0.54157			13.174	0.447509				6.213	0.337522			35.562	1.93191				11.223	1.35215			5.279	0.636017							18.902	0.821412			16.685	0.725069				14.311	0.784901				17.364	0.952346
			22.418	0.76152			70.305	2.3882				15.657	0.850569			25.241	1.37122				10.877	1.31047			8.581	1.03384							16.374	0.711554			14.952	0.649759				17.412	0.954979				17.994	0.986899
			16.163	0.549043			68.912	2.34088				11.799	0.640982			32.675	1.77507				10.869	1.3095			5.2	0.626499							17.911	0.778346			10.263	0.445992				16.329	0.89558				14.639	0.802891
			21.823	0.741308			57.785	1.96291				15.427	0.838074			41.899	2.27617				9.876	1.18987			5.305	0.639149							14.497	0.629986			18.769	0.815632				24.625	1.35058				19.86	1.08924
			17.059	0.579479			44.812	1.52222				10.18	0.55303			32.2	1.74927				11.038	1.32986			5.078	0.6118							14.362	0.62412			6.013	0.261303				25.909	1.42101				6.605	0.362258
			23.322	0.792228			49.071	1.6669				13.62	0.739908			34.761	1.8884				10.129	1.22035			4.083	0.491922							19.48	0.846529			13.381	0.581489				17.74	0.972968				15.348	0.841777
			22.515	0.764815			39.722	1.34932				12.402	0.67374			25.831	1.40327				19.195	2.31262			4.648	0.559993							13.743	0.59722			16.886	0.733804				24.2	1.32727				19.416	1.06489
			16.513	0.560932			81.307	2.76193				12.23	0.664397			49.012	2.66258				8.565	1.03192			3.352	0.403851							16.252	0.706252			15.846	0.688609				18.559	1.01789				17.3	0.948836
			19.341	0.656997			55.188	1.87469				11.788	0.640385			40.524	2.20147				7.575	0.91264			5.649	0.680594							16.053	0.697605			15.425	0.670314				27.405	1.50305				14.07	0.771683
			14.917	0.506717			46.204	1.56951				10.534	0.572261			37.367	2.02997				12.245	1.47528			4.675	0.563246							15.282	0.6641			14.496	0.629943				24.954	1.36863				9.033	0.495424
			19.071	0.647825			23.84	0.809824				11.368	0.617568			30.087	1.63448				7.678	0.925049			4.316	0.519994							16.443	0.714552			16.436	0.714248				17.324	0.950152				17.632	0.967045
			21.653	0.735533			48.426	1.64499				10.526	0.571826			36.984	2.00916				10.193	1.22806			4.681	0.563969							14.975	0.650759			16.047	0.697344				24.418	1.33923				15.692	0.860644
			18.503	0.628531			110.962	3.76928				10.382	0.564004			34.864	1.89399				10.296	1.24047			4.315	0.519873							14.848	0.64524			13.452	0.584575				25.487	1.39786				12.98	0.711901
			20.234	0.687331			91.841	3.11976				15.23	0.827372			48.021	2.60875				16.194	1.95106			5.738	0.691317							14.69	0.638374			12.409	0.53925				16.673	0.914448				17.559	0.963041
			14.274	0.484875			103.934	3.53055				8.42	0.457418			39.035	2.12058				8.378	1.00939			4.384	0.528187							14.464	0.628552			18.933	0.822759				23.837	1.30736				15.131	0.829875
			18.189	0.617864			103.132	3.5033				14.437	0.784292			39.893	2.16719				9.857	1.18758			4.995	0.6018							16.314	0.708947			17.36	0.754402				17.702	0.970884				20.345	1.11584
			14.676	0.498531			79.678	2.70659				12.414	0.674392			31.783	1.72662				7.013	0.84493			5.727	0.689992							15.666	0.680787			13.725	0.596438				25.633	1.40587				19.614	1.07575
			20.407	0.693208			104.489	3.5494				6.157	0.33448			29.972	1.62823				9.998	1.20456			6.914	0.833002							14.594	0.634202			12.229	0.531427				23.122	1.26815				17.278	0.947629
			20.71	0.703501			125.677	4.26914				13.634	0.740669			44.161	2.39905				8.26	0.995169			4.205	0.506621							13.809	0.600089			13.797	0.599567				18.192	0.997759				12.884	0.706636
			23.256	0.789986			82.609	2.80616				4.862	0.264129			35.554	1.93148				8.95	1.0783			8.909	1.07336							14.14	0.614473			14.903	0.64763				22.756	1.24808				18.075	0.991342
			16.715	0.567794			115.681	3.92958				9.453	0.513536			24.065	1.30733				8.404	1.01252			9.473	1.14131							16.685	0.725069			18.048	0.7843				21.698	1.19005				16.935	0.928817
			18.272	0.620684			100.063	3.39905				13.685	0.74344			37.709	2.04855				8.292	0.999024			9.985	1.203							14.347	0.623468			5.549	0.241139				19.397	1.06385				16.071	0.88143
			23.308	0.791752			131.374	4.46266				14.569	0.791463			41.371	2.24749				8.638	1.04071			11.65	1.4036							10.98	0.477151			11.586	0.503485				23.557	1.29201				16.972	0.930846
			19.281	0.654959			95.585	3.24694				16.15	0.877351			21.959	1.19293				18.615	2.24274			7.118	0.85758							15.551	0.675789			17.212	0.74797				16.63	0.912089				22.084	1.21122
			15.22	0.51701			92.407	3.13898				14.438	0.784346			32.279	1.75356				8.879	1.06975			6.459	0.778184							13.341	0.579751			13.797	0.599567				19.8	1.08595				8.931	0.48983
			21.901	0.743958			107.297	3.64478				12.924	0.702098			29.561	1.60591				18.673	2.24973			8.913	1.07384							14.112	0.613256			12.926	0.561717				18.369	1.00747				17.977	0.985967
			17.523	0.595241			127.315	4.32478				15.112	0.820962			31.359	1.70358				12.215	1.47167			10.543	1.27023							12.913	0.561152			14.583	0.633724				17.346	0.951359				16.592	0.910005
			15.37	0.522105			88.541	3.00766				14.361	0.780163			33.296	1.80881				8.576	1.03324			10.441	1.25794							12.225	0.531254			13.392	0.581967				15.901	0.872106				10.931	0.599522
			24.717	0.839615			67.528	2.29387				15.903	0.863933			26.735	1.45238				18.483	2.22684			10.637	1.28155							12.237	0.531775			9.008	0.391455				17.869	0.980043				17.028	0.933918
			19.824	0.673404			83.975	2.85256				14.311	0.777447			21.237	1.1537				13.165	1.58613			11.625	1.40059							25.209	1.09549			14.807	0.643458				21.95	1.20387				19.758	1.08365
			19.414	0.659477			111.42	3.78484				10.311	0.560147			22.464	1.22036				12.114	1.4595			7.971	0.96035							24.734	1.07485			12.535	0.544725				19.151	1.05036				14.192	0.778375
			26.656	0.905481			72.584	2.46561				8.062	0.437969			35.085	1.906				9.746	1.1742			9.251	1.11457							17.616	0.765527			15.143	0.658059				15.139	0.830314				19.021	1.04323
			18.379	0.624318			104.99	3.56642				13.479	0.732249			22.561	1.22563				18.099	2.18058			10.384	1.25107							17.621	0.765744			24.091	1.04691				18.375	1.0078				15.672	0.859547
			30.127	1.02339			119.744	4.0676				10.01	0.543795			25.037	1.36014				11.989	1.44444			11.38	1.37107							20.664	0.897982			21.907	0.951998				21.67	1.18851				13.405	0.735211
			28.258	0.959899			110.284	3.74625				12.949	0.703456			21.388	1.16191				10.782	1.29902			11.346	1.36697							22.356	0.97151			16.162	0.702341				21.159	1.16049				16.396	0.899255
			27.993	0.950898			98.426	3.34344				15.73	0.854535			26.826	1.45733				9.627	1.15987			10.229	1.2324							27.181	1.18119			19.803	0.860566				26.973	1.47936				6.43	0.35266
			27.12	0.921243			95.018	3.22768				6.308	0.342683			15.169	0.824058				12.271	1.47842			8.703	1.04854							25.707	1.11713			10.795	0.469111				18.101	0.992768				16.172	0.88697
			20.215	0.686686			32.891	1.11728				11.176	0.607138			40.715	2.21185				9	1.08432			9.154	1.10288							18.934	0.822802			17.712	0.769699				29.834	1.63628				20.001	1.09698
			19.077	0.648029			173.481	5.893				16.187	0.879361			34.781	1.88948				18.003	2.16901			11.24	1.3542							20.378	0.885553			19.807	0.86074				29.559	1.62119				8.996	0.493395
			27.86	0.94638			131.096	4.45322				13.143	0.713995			34.312	1.864				16.425	1.97889			13.743	1.65576							22.733	0.987893			15.021	0.652758				22.77	1.24884				20.89	1.14573
			17.788	0.604243			96.23	3.26885				17.341	0.942052			25.323	1.37568				8.706	1.0489			10.431	1.25673							20.048	0.871213			13.031	0.566279				18.462	1.01257				11.848	0.649816
			23.629	0.802656			89.472	3.03929				12.569	0.682813			30.086	1.63443				21.246	2.55973			12.727	1.53336							26.975	1.17223			13.875	0.602957				16.007	0.87792				6.028	0.330612
			20.186	0.685701			141.508	4.8069				13.657	0.741918			11.554	0.627673				7.964	0.959507			18.505	2.22949							20.488	0.890333			15.285	0.66423				24.701	1.35475				20.339	1.11551
			17.836	0.605873			132.377	4.49673				15.347	0.833728			28.301	1.53746				12.516	1.50793			8.693	1.04734							24.416	1.06103			15.653	0.680222				26.02	1.42709				15.423	0.84589
			22.271	0.756526			140.904	4.78639				12.386	0.672871			35.753	1.94229				8.911	1.0736			9.745	1.17408							18.604	0.808462			15.37	0.667924				27.55	1.51101				18.525	1.01602
			21.178	0.719398			113.394	3.85189				17.537	0.9527			39	2.11868				15.55	1.87347			8.29	0.998783							20.097	0.873342			15.185	0.659884				17.212	0.94401				18.352	1.00653
			17.958	0.610017			126.488	4.29669				13.74	0.746427			38.843	2.11015				18.231	2.19648			9.245	1.11384							25.583	1.11174			16.48	0.71616				28.932	1.5868				14.337	0.786327
			20.81	0.706897			112.637	3.82618				11.895	0.646198			21.635	1.17532				11.314	1.36312			8.213	0.989506							23.959	1.04117			15.814	0.687218				25.175	1.38075				10.94	0.600015
			21.059	0.715356			118.834	4.03669				15.224	0.827046			24.245	1.31711				8.054	0.97035			9.15	1.1024							23.222	1.00914			11.061	0.48067				16.677	0.914667				15.556	0.853185
			18.552	0.630195			114.13	3.8769				8.596	0.466979			34.662	1.88302				15.311	1.84468			8.939	1.07698							17.057	0.741235			17.192	0.747101				25.209	1.38261				14.834	0.813586
			19.672	0.668241			61.571	2.09151				9.149	0.497021			43.447	2.36026				10.528	1.26842			6.255	0.753606							17.354	0.754141			18.779	0.816066				26.682	1.4634				11.327	0.621241
			24.596	0.835505			101.836	3.45928				14.24	0.77359			41.526	2.25591				13.128	1.58167			8.648	1.04192							20.384	0.885814			16.156	0.702081				17.055	0.935399				17.785	0.975436
			20.003	0.679484			112.679	3.82761				13.317	0.723448			30.645	1.66479				13.542	1.63155			5.379	0.648065							18.142	0.788385			16.069	0.6983				24.443	1.3406				11.174	0.612849
			21.646	0.735296			102.361	3.47711				13.597	0.738659			23.13	1.25654				11.422	1.37613			3.824	0.460717							21.27	0.924316			18.095	0.786342				25.994	1.42567				18.99	1.04153
			22.407	0.761146			92.476	3.14133				9.424	0.51196			27.8	1.51024				14.192	1.70986			6.159	0.742039							21.966	0.954562			12.72	0.552765				23.106	1.26727				15.868	0.870296
			19.557	0.664334			110.21	3.74374				13.164	0.715136			36.613	1.98901				14.008	1.68769			8.059	0.970952							19.203	0.834492			14.904	0.647673				23.707	1.30023				9.997	0.548296
			19.436	0.660224			104.145	3.53771				14.04	0.762725			33.44	1.81663				12.177	1.46709			4.556	0.548909							17.232	0.74884			10.686	0.464374				23.92	1.31192				11.246	0.616798
			21.206	0.720349			91.614	3.11205				14.652	0.795972			29.795	1.61862				10.016	1.20673			5.095	0.613848							26.341	1.14468			17.283	0.751056				19.79	1.0854				16.384	0.898597
			22.071	0.749732			107.816	3.66241				16.054	0.872136			23.196	1.26013				15.506	1.86817			3.313	0.399152							14.564	0.632898			8.224	0.357385				23.381	1.28235				12.796	0.70181
			19.118	0.649422			71.474	2.42791				14.966	0.81303			33.565	1.82342				13.442	1.6195			4.745	0.57168							19.207	0.834666			16.206	0.704253				21.005	1.15204				15.514	0.850881
			18.482	0.627817			81.367	2.76397				13.116	0.712529			31.546	1.71374				11.858	1.42866			8.943	1.07746							26.423	1.14825			12.381	0.538033				21.542	1.18149				19.696	1.08025
			21.927	0.744841			126.959	4.31269				14.745	0.801024			20.603	1.11926				13.48	1.62408			15.098	1.81901							18.771	0.815719			10.101	0.438952				21.236	1.16471				15.708	0.861521
			24.097	0.818554			53.392	1.81368				14.175	0.770059			33.128	1.79968				17.78	2.14214			11.835	1.42589							19.312	0.839229			9.992	0.434216				17.943	0.984102				11.854	0.650145
			23.65	0.80337			109.67	3.72539				12.272	0.666678			26.679	1.44934				12.733	1.53408			6.181	0.74469							21.113	0.917494			13.275	0.576883				26.345	1.44492				17.357	0.951962
			25.128	0.853576			118.545	4.02687				14.896	0.809227			34.875	1.89459				13.475	1.62347			10.663	1.28468							20.533	0.892289			8.639	0.375419				21.943	1.20349				16.981	0.93134
			17.611	0.59823			70.115	2.38175				13.977	0.759303			25.568	1.38899				11.823	1.42444			8.901	1.0724							18.732	0.814024			10.775	0.468242				17.124	0.939183				18.671	1.02403
			23.299	0.791447			57.886	1.96634				15.803	0.8585			32.71	1.77698				8.804	1.06071			11.95	1.43974							20.441	0.888291			17.816	0.774218				16.54	0.907153				16.718	0.916916
			16.419	0.557739			78.016	2.65014				10.362	0.562917			42.415	2.3042				15.562	1.87492			10.423	1.25577							17.856	0.775956			13.35	0.580142				19.975	1.09555				13.341	0.731701
			21.657	0.735669			92.43	3.13977				12.848	0.697969			31.849	1.7302				12.233	1.47384			11.115	1.33914							16.367	0.71125			18.599	0.808244				16.585	0.909621				16.824	0.922729
			22.19	0.753775			84.454	2.86883				15.693	0.852524			33.996	1.84684				11.343	1.36661			8.296	0.999506							19.18	0.833492			17.174	0.746319				17.691	0.970281				12.91	0.708062
			19.414	0.659477			125.196	4.2528				16.033	0.870995			25.067	1.36177				13.883	1.67263			9.668	1.16481							19.453	0.845356			11.064	0.480801				17.832	0.978014				17.894	0.981414
			17.291	0.58736			119.708	4.06638				9.819	0.533419			47.529	2.58202				11.96	1.44095			9.507	1.14541							24.088	1.04678			17.004	0.738931				22.369	1.22685				13.371	0.733346
			20.481	0.695722			102.712	3.48904				16.559	0.89957			40.277	2.18805				15.394	1.85468			7.803	0.940109							20.959	0.910801			11.93	0.518434				19.033	1.04388				14.552	0.798119
			16.459	0.559098			90.161	3.06269				15.775	0.856979			37.995	2.06408				8.484	1.02216			10.075	1.21384							24.369	1.05899			11.3	0.491057				14.106	0.773658				18.677	1.02436
			20.033	0.680503			75.061	2.54976				11.303	0.614037			29.721	1.6146				14.951	1.8013			11.104	1.33782							27.933	1.21387			12.344	0.536425				15.049	0.825378				19.812	1.08661
			22.215	0.754624			86.794	2.94832				16.244	0.882458			36.476	1.98156				16.415	1.97769			9.298	1.12023							28.679	1.24628			16.292	0.707991				21.89	1.20058				23.171	1.27084
			20.151	0.684512			123.387	4.19135				15.305	0.831446			38.668	2.10064				13.653	1.64492			9.991	1.20372							18.259	0.793469			14.459	0.628335				16.515	0.905782				14.234	0.780678
			19.607	0.666033			117.16	3.97982				15.842	0.860619			45.717	2.48358				13.158	1.58528			10.966	1.32119							16.187	0.703428			8.081	0.351171				19.98	1.09582				13.961	0.765705
			22.119	0.751363			98.549	3.34762				14.807	0.804392			40.074	2.17703				12.542	1.51107			8.104	0.976374							27.675	1.20265			14.789	0.642676				14.636	0.802726				12.511	0.686178
			19.686	0.668716			83.034	2.82059				16.87	0.916465			32.436	1.76209				12.031	1.4495			10.201	1.22902							19.836	0.862			13.786	0.599089				18.013	0.987941				15.072	0.826639
			21.756	0.739032			44.449	1.50989				14.382	0.781304			30.4	1.65148				12.915	1.55601			11.908	1.43468							24.71	1.07381			15.122	0.657147				18.417	1.0101				19.672	1.07893
			21.606	0.733937			114.318	3.88328				14.718	0.799557			40.82	2.21755				12.732	1.53396			8.01	0.965049							15.733	0.683698			19.182	0.833579				13.516	0.741299				14.227	0.780294
			18.694	0.635019			91.771	3.11738				13.927	0.756586			35.386	1.92235				14.635	1.76323			10.148	1.22264							15.292	0.664534			12.713	0.55246				19.336	1.0605				20.112	1.10306
			22.878	0.777146			71.029	2.41279				15.179	0.824601			22.127	1.20205				13.156	1.58504			8.873	1.06902							15.407	0.669532			14.109	0.613125				17.466	0.95794				18.67	1.02397
			19.551	0.66413			100.648	3.41892				11.143	0.605345			36.185	1.96576				13.953	1.68106			10.307	1.24179							16.003	0.695432			19.742	0.857915				18.08	0.991616				16.163	0.886476
			19.14	0.650169			95.018	3.22768				14.101	0.766039			36.284	1.97113				7.893	0.950953			9.22	1.11083							21.281	0.924794			9.34	0.405882				16.863	0.924868				17.807	0.976643
			19.873	0.675068			142.285	4.8333				14.994	0.814551			38.75	2.1051				11.758	1.41661			12.376	1.49107							22.738	0.98811			22.757	0.988936				16.279	0.892838				23.122	1.26815
			17.83	0.605669			128.27	4.35722				13.29	0.721981			21.587	1.17272				13.328	1.60576			9.309	1.12155							17.217	0.748188			16.334	0.709816				21.016	1.15264				19.637	1.07701
			22.335	0.7587			56.4	1.91586				12.719	0.690962			34.574	1.87824				13.653	1.64492			8.997	1.08396							22.413	0.973987			12.191	0.529776				21.139	1.15939				19.254	1.05601
			19.321	0.656317			105.464	3.58252				12.709	0.690418			38.608	2.09739				9.194	1.1077			9.458	1.1395							27.488	1.19453			16.061	0.697952				17.027	0.933863				16.485	0.904136
			17.411	0.591436			72.098	2.44911				11.914	0.64723			24.274	1.31869				12.203	1.47022			8.395	1.01143							21.293	0.925316			11.713	0.509004				16.736	0.917903				23.705	1.30012
			20.027	0.6803			31.617	1.074				11.038	0.599641			44.74	2.43051				13.558	1.63347			13.936	1.67902							15.527	0.674746			14.199	0.617036				16.417	0.900407				23.21	1.27298
			22.577	0.766921			94.851	3.22201				7.562	0.410807			33.906	1.84195				15.655	1.88612			8.917	1.07432							16.182	0.70321			11.316	0.491752				14.75	0.808979				11.929	0.654258
			23.475	0.797425			71.58	2.43151				6.439	0.3498			49.979	2.71512				10.87	1.30962			7.378	0.888905							15.538	0.675225			11.154	0.484712				14.025	0.769215				18.996	1.04185
			19.114	0.649286			32.532	1.10508				5.026	0.273038			22.181	1.20499				10.932	1.31709			13.323	1.60516							17.694	0.768916			6.405	0.278338				17.194	0.943022				18.693	1.02524
			18.636	0.633049			82.06	2.78751				23.353	1.26866			46.173	2.50835				13.35	1.60841			12.347	1.48757							20.687	0.898981			14.576	0.63342				15.194	0.83333				19.196	1.05282
			21.144	0.718243			82.558	2.80442				22.519	1.22335			26.352	1.43158				12.662	1.52552			9.681	1.16637							16.406	0.712945			12.715	0.552547				12.549	0.688263				15.022	0.823897
			17.86	0.606689			102.619	3.48588				29.107	1.58124			41.245	2.24064				13.249	1.59625			10.329	1.24444							18.528	0.805159			18.811	0.817457				14.697	0.806072				21.81	1.19619
			16.023	0.544287			107.076	3.63728				28.772	1.56304			46.006	2.49928				10.165	1.22468			11.814	1.42336							16.806	0.730327			14.723	0.639808				16.219	0.889547				20.137	1.10443
			17.525	0.595309			44.088	1.49763				29.054	1.57836			45.537	2.4738				10.575	1.27408			8.055	0.970471							24.367	1.0589			18.962	0.824019				13.021	0.71415				15.481	0.849071
			13.36	0.453827			88.829	3.01744				27.303	1.48324			39.336	2.13693				12.36	1.48914			10.532	1.2689							16.874	0.733282			17.14	0.744842				16.976	0.931066				21.1	1.15725
			17.053	0.579275			95.798	3.25417				26.329	1.43033			57.408	3.1187				15.548	1.87323			9.711	1.16999							14.494	0.629856			12.073	0.524648				14.014	0.768612				12.373	0.67861
			20.331	0.690626			110.383	3.74961				24.667	1.34004			46.045	2.5014				14.218	1.71299			9.958	1.19974							16.004	0.695475			14.205	0.617297				13.836	0.758849				10.884	0.596944
			16.076	0.546088			92.42	3.13943				29.47	1.60096			40.866	2.22005				10.689	1.28782			7.98	0.961435							14.975	0.650759			6.38	0.277251				24.298	1.33265				10.497	0.575719
			22.684	0.770556			64.969	2.20694				24.134	1.31108			33.427	1.81593				9.187	1.10685			9.982	1.20264							23.569	1.02422			15.438	0.670879				20.101	1.10246				9.949	0.545663
			17.807	0.604888			71.692	2.43531				23.84	1.29511			42.464	2.30686				13.938	1.67926			9.556	1.15131							14.984	0.65115			16.45	0.714857				20.956	1.14935				9.455	0.518569
			17.977	0.610663			71.589	2.43182				22.022	1.19635			48.686	2.64487				11.842	1.42673			9.941	1.1977							15.053	0.654148			15.592	0.677571				17.406	0.95465				16.795	0.921139
			15.278	0.51898			45.817	1.55636				24.936	1.35465			50.171	2.72555				8.932	1.07613			12.449	1.49986							21.106	0.917189			10.804	0.469502				18.971	1.04048				17.383	0.953388
			17.489	0.594086			107.45	3.64998				21.704	1.17907			24.69	1.34129				4.611	0.555536			7.746	0.933242							18.293	0.794947			19.655	0.854134				19.177	1.05178				20.719	1.13635
			22.751	0.772832			78.066	2.65183				20.34	1.10497			28.146	1.52904				10.126	1.21999			10.158	1.22384							15.348	0.666968			10.394	0.451685				18.002	0.987338				15.929	0.873642
			16.676	0.566469			70.077	2.38045				13.846	0.752186			41.412	2.24971				10.476	1.26215			11.845	1.42709							17.034	0.740235			14.952	0.649759				12.124	0.664953				17.202	0.943461
			18.098	0.614773			79.703	2.70744				18.399	0.999528			33.815	1.837				10.686	1.28745			13.244	1.59564							19.778	0.859479			14.807	0.643458				23.292	1.27747				12.959	0.710749
			17.737	0.60251			91.978	3.12441				19.863	1.07906			36.5	1.98287				16.735	2.01624			13.882	1.67251							16.495	0.716812			10.338	0.449252				20.074	1.10098				12.666	0.69468
			14.841	0.504136			107.542	3.65311				16.332	0.887238			21.268	1.15539				12.763	1.53769			7.784	0.93782							13.454	0.584662			15.596	0.677745				16.658	0.913625				19.54	1.07169
			14.725	0.500195			126.514	4.29757				22.935	1.24595			38.201	2.07527				4.043	0.487103			9.898	1.19252							14.924	0.648542			8.143	0.353865				25.148	1.37927				13.733	0.7532
			14.237	0.483618			83.167	2.82511				19.872	1.07955			41.379	2.24792				12.073	1.45456			9.75	1.17469							14.848	0.64524			8.506	0.36964				16.923	0.928159				11.949	0.655355
			17.745	0.602782			90.559	3.07621				15.906	0.864096			34.843	1.89285				9.368	1.12866			8.35	1.00601							18.217	0.791644			15.587	0.677354				23.046	1.26398				17.45	0.957063
			17.994	0.61124			125.244	4.25443				21.974	1.19374			39.764	2.16019				9.635	1.16083			7.184	0.865532							23.304	1.01271			11.259	0.489275				24.749	1.35738				16.307	0.894374
			17.66	0.599895			46.616	1.5835				17.378	0.944062			36.06	1.95896				6.361	0.766377			7.599	0.915531							12.402	0.538945			13.406	0.582576				18.813	1.03182				18.857	1.03423
			10.939	0.371588			84.338	2.86489				25.172	1.36747			37.82	2.05458				11.993	1.44492			8.641	1.04107							14.41	0.626206			14.434	0.627249				30.064	1.64889				19.365	1.06209
			20.089	0.682406			30.804	1.04638				19.635	1.06667			35.895	1.95				10.615	1.2789			8.734	1.05228							21.644	0.940569			18.025	0.7833				14.192	0.778375				14.879	0.816054
			18.729	0.636208			103.982	3.53218				23.037	1.25149			38.905	2.11352				11.638	1.40215			10.546	1.27059							14.348	0.623511			16.216	0.704688				25.117	1.37757				16.034	0.879401
			18.968	0.644326			78.269	2.65873				23.45	1.27392			34.045	1.8495				3.832	0.461681			13.602	1.63878							15.1	0.656191			13.347	0.580012				23.26	1.27572				16.557	0.908085
			17.887	0.607606			80.108	2.7212				19.809	1.07613			40.381	2.1937				9.738	1.17324			10.119	1.21914							19.964	0.867562			14.804	0.643328				20.587	1.12911				12.537	0.687604
			14.066	0.47781			108.215	3.67597				21.974	1.19374			36.518	1.98385				14.046	1.69227			12.97	1.56263							17.971	0.780954			9.76	0.424134				20.186	1.10712				17.42	0.955417
			10.757	0.365406			59.57	2.02354				14.32	0.777936			39.701	2.15676				10.406	1.25372			11.865	1.4295							13.811	0.600175			12.289	0.534035				20.743	1.13767				10.451	0.573196
			23.481	0.797629			74.21	2.52085				11.836	0.642992			45.673	2.48119				11.971	1.44227			10.253	1.23529							13.321	0.578882			12.788	0.55572				23.116	1.26782				14.707	0.80662
			15.352	0.521494			127.664	4.33663				19.915	1.08189			34.379	1.86764				10.803	1.30155			11.444	1.37878							21.901	0.951737			13.876	0.603				28.025	1.53706				8.178	0.448531
			17.147	0.582469			88.653	3.01146				24.63	1.33803			55.057	2.99098				3.044	0.366743			13.032	1.5701							26.132	1.1356			7.128	0.309757				14.977	0.821429				14.172	0.777278
			21.275	0.722693			78.9	2.68016				23.809	1.29343			11.352	0.616699				9.852	1.18697			9.166	1.10432							13.2	0.573624			10.484	0.455596				23.744	1.30226				9.72	0.533103
			20.935	0.711144			65.279	2.21747				19.469	1.05766			31.456	1.70885				8.395	1.01143			10.061	1.21215							15.896	0.690782			14.641	0.636244				20.472	1.12281				11.505	0.631003
			18.449	0.626696			72.608	2.46643				23.457	1.2743			35.414	1.92387				6.042	0.727943			12.369	1.49022							31.183	1.3551			18.893	0.82102				23.106	1.26727				10.125	0.555316
			15.234	0.517486			98.332	3.34025				12.011	0.652499			38.313	2.08136				3.859	0.464934			14.046	1.69227							14.721	0.639721			9.05	0.39328				24.891	1.36517				14.944	0.819619
			14.692	0.499074			112.733	3.82944				13.074	0.710247			44.108	2.39617				11.486	1.38384			9.725	1.17167							17.974	0.781084			17.877	0.776869				24.749	1.35738				14.118	0.774316
			12.184	0.41388			125.172	4.25198				15.082	0.819332			38.58	2.09586				11.278	1.35878			11.843	1.42685							27.223	1.18301			15.379	0.668315				24.236	1.32925				14.575	0.799381
			14.945	0.507669			70.135	2.38242				14.569	0.791463			29.728	1.61498				11.316	1.36336			11.004	1.32577							14.351	0.623642			13.738	0.597003				16.986	0.931614				18.956	1.03966
			13.991	0.475262			131.506	4.46714				10.212	0.554768			15.848	0.860945				11.131	1.34107			12.001	1.44589							23.114	1.00445			13.658	0.593527				25.786	1.41426				12.303	0.67477
			19.465	0.661209			96.314	3.2717				12.158	0.660485			50.252	2.72995				3.013	0.363008			10.943	1.31842							19.573	0.850571			13.791	0.599306				19.427	1.06549				17.777	0.974998
			15.198	0.516263			80.425	2.73197				11.92	0.647556			32.789	1.78127				7.72	0.93011			11.683	1.40757							14.085	0.612082			16.724	0.726764				22.252	1.22043				12.217	0.670054
			20.017	0.67996			88.245	2.99761				14.003	0.760715			38.931	2.11493				10.695	1.28854			13.853	1.66902							17.785	0.772871			10.755	0.467373				23.729	1.30144				16.397	0.89931
			18.747	0.636819			114.051	3.87421				14.361	0.780163			24.775	1.34591				11.81	1.42287			11.776	1.41878							16.882	0.73363			15.309	0.665273				20.524	1.12566				17.157	0.940993
			20.309	0.689879			102.315	3.47555				15.035	0.816779			48.967	2.66014				17.066	2.05612			13.676	1.64769							21.595	0.93844			16.29	0.707904				15.335	0.841064				13.317	0.730384
			21.921	0.744637			123.522	4.19593				15.308	0.831609			30.709	1.66827				19.214	2.31491			12.079	1.45528							11.732	0.50983			5.07	0.220324				16.785	0.92059				20.548	1.12698
			15.419	0.52377			74.343	2.52537				14.006	0.760878			25.065	1.36166				14.496	1.74649			12.93	1.55781							22.305	0.969294			12.44	0.540597				27.348	1.49993				19.262	1.05644
			14.627	0.496866			120.288	4.08608				14.437	0.784292			36.064	1.95918				30.164	3.63417			13.235	1.59456							13.178	0.572668			9.99	0.434129				23.556	1.29195				6.648	0.364616
			16.238	0.551591			114.482	3.88885				16.463	0.894355			58.046	3.15336				17.526	2.11154			7.523	0.906375							23.363	1.01527			12.899	0.560543				23.786	1.30457				16.814	0.922181
			14.92	0.506819			95.788	3.25383				12.856	0.698404			48.585	2.63939				15.101	1.81938			8.71	1.04939							16.865	0.732891			12.454	0.541205				25.262	1.38552				20.78	1.1397
			17.049	0.57914			136.745	4.64511				14.314	0.77761			29.454	1.60009				9.824	1.1836			8.251	0.994085							16.925	0.735498			18.637	0.809896				24.245	1.32974				16.833	0.923223
			17.116	0.581415			107.372	3.64733				13.908	0.755554			36.6	1.9883				26.313	3.1702			8.254	0.994446							20.129	0.874733			8.14	0.353735				19.66	1.07827				13.317	0.730384
			14.537	0.493809			122.252	4.15279				13.051	0.708997			31.961	1.73629				11.392	1.37251			8.17	0.984326							11.577	0.503094			13.49	0.586226				22.527	1.23552				16.502	0.905069
			13.736	0.4666			110.974	3.76969				10.747	0.583832			51.21	2.78199				14.386	1.73323			12.846	1.54769							16.769	0.728719			14.595	0.634245				23.316	1.27879				10.822	0.593544
			16.089	0.546529			131.638	4.47163				10.686	0.580518			38.427	2.08755				17.961	2.16395			4.879	0.587824							22.326	0.970206			5.628	0.244572				21.018	1.15275				14.646	0.803275
			15.288	0.51932			116.483	3.95683				11.458	0.622457			49.433	2.68545				10.117	1.2189			6.921	0.833846							25.161	1.0934			5.615	0.244007				16.304	0.894209				13.424	0.736253
			16.859	0.572685			134.282	4.56144				12.064	0.655379			48.397	2.62917				17.009	2.04925			8.068	0.972037							25.182	1.09432			13.03	0.566236				30.139	1.653				12.423	0.681352
			16.431	0.558147			108.535	3.68684				12.335	0.670101			18.816	1.02218				24.549	2.95768			7.979	0.961314							26.308	1.14325			15.443	0.671096				23.053	1.26437				15.685	0.86026
			14.549	0.494217			42.63	1.4481				39.44	2.14258			41.829	2.27237				15.189	1.82998			7.8	0.939748							16.575	0.720289			17.292	0.751447				17.327	0.950317				13.677	0.750129
			16.921	0.574792			104.727	3.55748				37.762	2.05143			45.164	2.45354				17.202	2.07251			10.126	1.21999							17.024	0.739801			16.851	0.732283				13.517	0.741354				17.379	0.953169
			17.015	0.577985			106.395	3.61414				29.994	1.62943			36.948	2.00721				9.406	1.13324			10.358	1.24794							25.471	1.10688			11.584	0.503398				11.897	0.652503				12.918	0.708501
			14.612	0.496357			98.484	3.34542				46.346	2.51775			46.263	2.51324				11.14	1.34215			11.961	1.44107							23.804	1.03443			13.785	0.599046				14.84	0.813915				16.358	0.897171
			16.018	0.544117			142.265	4.83262				40.24	2.18604			42.675	2.31833				10.165	1.22468			9.373	1.12926							14.918	0.648282			12.794	0.55598				17.496	0.959586				17.277	0.947575
			16.869	0.573025			130.036	4.41721				45.461	2.46968			62.297	3.38429				8.315	1.0018			11.584	1.39565							12.972	0.563716			17.012	0.739279				24.089	1.32119				10.135	0.555864
			16.522	0.561238			116.503	3.9575				25.637	1.39273			55.078	2.99212				8.705	1.04878			7.257	0.874327							20.311	0.882642			17.569	0.763484				15.2	0.833659				9.264	0.508093
			18.442	0.626459			143.634	4.87912				29.525	1.60395			48.131	2.61472				19.706	2.37419			7.914	0.953483							20.262	0.880512			13.684	0.594656				21.175	1.16136				10.115	0.554767
			16.772	0.56973			133.607	4.53851				38.068	2.06805			42.094	2.28676				9.848	1.18649			8.759	1.05529							18.682	0.811851			21.973	0.954866				22.717	1.24594				17.014	0.93315
			14.968	0.50845			132.369	4.49646				28.261	1.53528			38.36	2.08391				19.707	2.37431			6.665	0.803003							23.153	1.00614			9.351	0.40636				14.136	0.775303				16.802	0.921523
			16.598	0.563819			90.415	3.07132				24.365	1.32363			39.793	2.16176				16.585	1.99817			4.043	0.487103							18.303	0.795381			11.211	0.487189				18.613	1.02085				16.396	0.899255
			15.348	0.521358			127.396	4.32753				39.026	2.12009			49.898	2.71072				9.302	1.12071			8.153	0.982278							18.438	0.801248			14.603	0.634593				25.404	1.39331				17.778	0.975052
			14.51	0.492892			139.167	4.72738				30.75	1.6705			66.917	3.63528				18.728	2.25636			11.624	1.40047							14.24	0.618818			17.837	0.775131				17.718	0.971762				8.57	0.47003
			16.749	0.568949			106.525	3.61856				43.63	2.37021			40.166	2.18202				7.592	0.914688			12.065	1.4536							22.927	0.996323			17.105	0.743321				20.805	1.14107				8.449	0.463394
			17.159	0.582876			143.593	4.87773				35.198	1.91214			50.548	2.74603				6.589	0.793846			11.402	1.37372							21.54	0.936049			5.694	0.24744				13.048	0.715631				12.176	0.667805
			15.372	0.522173			95.017	3.22764				23.318	1.26675			41.268	2.24189				8.433	1.01601			7.083	0.853363							18.205	0.791123			11.1	0.482365				16.788	0.920755				13.402	0.735046
			18.204	0.618374			89.733	3.04815				19.99	1.08596			46.984	2.55241				17.646	2.126			9.536	1.1489							23.688	1.02939			18.912	0.821846				14.383	0.78885				7.224	0.396208
			13.998	0.4755			103.252	3.50738				22.145	1.20303			54.288	2.9492				11.595	1.39697			13.478	1.62384							22.472	0.976551			14.479	0.629204				14.839	0.81386				11.93	0.654313
			17.937	0.609304			148.909	5.05831				19.195	1.04277			46.494	2.52579				15.989	1.92636			11.157	1.3442							14.986	0.651237			21.906	0.951954				18.715	1.02644				10.83	0.593982
			13.852	0.47054			81.804	2.77881				24.535	1.33287			41.507	2.25487				15.943	1.92082			12.458	1.50095							24.242	1.05347			8.193	0.356038				20.989	1.15116				12.438	0.682175
			17.031	0.578528			96.504	3.27816				23.992	1.30337			49.513	2.6898				7.974	0.960712			7.456	0.898303							20.677	0.898547			11.345	0.493012				23.796	1.30512				10.051	0.551257
			14.358	0.487729			106.528	3.61866				23.036	1.25143			62.699	3.40613				8.467	1.02011			6.31	0.760232							21.945	0.953649			11.325	0.492143				19.175	1.05167				19.34	1.06072
			15.361	0.5218			87.278	2.96476				21.302	1.15723			49.38	2.68258				6.845	0.824689			12.66	1.52528							16.318	0.70912			13.618	0.591788				22.455	1.23157				10.634	0.583232
			14.692	0.499074			60.967	2.071				40.376	2.19343			57.184	3.10653				15.595	1.87889			9.17	1.10481							26.092	1.13386			14.166	0.615602				11.07	0.607145				8.901	0.488184
			14.217	0.482939			89.38	3.03616				42.265	2.29605			53.31	2.89607				8.8	1.06023			9.624	1.1595							19.543	0.849267			12.546	0.545203				16.266	0.892125				7.43	0.407506
			14.452	0.490922			110.215	3.74391				24.668	1.34009			62.668	3.40445				14.592	1.75805			11.284	1.3595							38.365	1.6672			17.69	0.768743				23.418	1.28438				9.299	0.510013
			19.837	0.673845			96.011	3.26141				21	1.14083			25.878	1.40583				18.325	2.20781			10.108	1.21782							41.095	1.78584			17.697	0.769047				15.652	0.85845				8.74	0.479354
			15.639	0.531243			74.53	2.53172				34.208	1.85835			6.846	0.37191				7.57	0.912038			12.207	1.47071							36.131	1.57012			13.183	0.572885				19.639	1.07712				11.394	0.624915
			29.02	0.985784			81.839	2.78				42.514	2.30958			25.179	1.36785				13.86	1.66986			13.056	1.57299							40.102	1.74269			13.416	0.58301				17.12	0.938964				11.01	0.603855
			24.223	0.822834			71.285	2.42149				23.852	1.29576			26.771	1.45434				7.986	0.962157			10.174	1.22577							40.199	1.7469			16.955	0.736802				16.228	0.890041				14.246	0.781336
			21.442	0.728366			85.914	2.91842				20.742	1.12681			31.7	1.72211				19.767	2.38154			10.506	1.26577							36.173	1.57195			15.59	0.677484				16.098	0.882911				12.968	0.711243
			25.912	0.880208			73.341	2.49133				36.487	1.98216			32.452	1.76296				14.03	1.69034			9.916	1.19468							33.041	1.43584			15.438	0.670879				13.455	0.737953				9.1	0.499099
			23.585	0.801162			75.39	2.56093				29.56	1.60585			29.216	1.58716				13.611	1.63986			10.119	1.21914							36.823	1.60019			9.006	0.391368				15.686	0.860315				10.146	0.556468
			23.693	0.80483			70.357	2.38997				36.371	1.97586			36.516	1.98374				12.37	1.49034			8.446	1.01758							24.338	1.05764			14.995	0.651628				21.379	1.17255				17.265	0.946916
			26.417	0.897362			44.648	1.51665				33.748	1.83336			29.982	1.62878				16.242	1.95684			11.67	1.40601							27.094	1.17741			7.227	0.314059				17.896	0.981524				11.514	0.631497
			24.534	0.833398			59.417	2.01834				33.297	1.80886			27.56	1.4972				12.39	1.49275			7.139	0.86011							36.883	1.6028			15.923	0.691955				18.435	1.01109				8.898	0.48802
			27.385	0.930244			77.429	2.6302				31.994	1.73808			30.845	1.67566				9.512	1.14601			2.404	0.289635							26.26	1.14116			16.135	0.701168				13.538	0.742505				15.778	0.86536
			24.151	0.820388			50.087	1.70141				33.056	1.79577			28.846	1.56706				14.686	1.76938			3.273	0.394333							29.982	1.30291			13.637	0.592614				16.444	0.901888				6.735	0.369388
			25.495	0.866043			32.582	1.10678				26.322	1.42995			10.613	0.576553				16.311	1.96516			2.982	0.359273							37.371	1.62401			7.456	0.32401				12.022	0.659359				14.231	0.780514
			27.301	0.927391			70.212	2.38504				27.683	1.50388			26.631	1.44673				11.935	1.43793			4.459	0.537223							28.812	1.25206			14.137	0.614342				12.294	0.674277				15.258	0.83684
			24.163	0.820796			51.371	1.74503				38.163	2.07321			36.342	1.97428				15.067	1.81528			3.525	0.424694							42.865	1.86276			13.465	0.58514				16.823	0.922674				12.231	0.670822
			24.545	0.833772			71.597	2.43209				20.478	1.11247			26.169	1.42163				7.643	0.920833			6.375	0.768063							22.297	0.968946			6.276	0.272732				18.072	0.991177				10.755	0.589869
			23.974	0.814376			66.65	2.26404				26.736	1.45244			15.729	0.85448				9.708	1.16962			7.343	0.884688							38.558	1.67559			16.795	0.729849				16.347	0.896568				11.542	0.633033
			24.039	0.816584			65.526	2.22586				20.627	1.12056			20.973	1.13936				10.802	1.30143			7.798	0.939507							38.402	1.66881			9.047	0.393149				18.025	0.988599				14.947	0.819783
			26.84	0.911731			53.796	1.8274				18.63	1.01208			24.16	1.3125				15.933	1.91962			11.002	1.32553							36.71	1.59528			8.85	0.384589				17.448	0.956953				13.08	0.717386
			23.257	0.79002			60.06	2.04019				30.855	1.6762			23.665	1.2856				14.722	1.77371			11.651	1.40372							35.729	1.55265			4.266	0.185385				16.678	0.914722				14.707	0.80662
			22.169	0.753061			67.182	2.28211				23.725	1.28886			25.103	1.36372				7.942	0.956856			11.264	1.35709							33.799	1.46878			17.668	0.767786				15.188	0.833001				12.905	0.707788
			22.939	0.779218			54.103	1.83783				21.871	1.18815			26.613	1.44576				17.46	2.10359			6.348	0.76481							34.174	1.48508			15.229	0.661796				20.27	1.11173				7.851	0.430596
			22.291	0.757206			52.361	1.77866				25.314	1.37519			22.206	1.20634				16.035	1.93191			6.231	0.750714							42.705	1.8558			22.015	0.956691				21.103	1.15742				13.245	0.726435
			23.189	0.78771			58.978	2.00343				20.665	1.12263			24.183	1.31374				15.211	1.83263			8.723	1.05095							40.544	1.76189			14.922	0.648455				15.769	0.864867				8.435	0.462626
			24.392	0.828575			72.566	2.465				36.899	2.00454			28.795	1.56429				13.446	1.61998			12.08	1.4554							33.426	1.45257			12.795	0.556024				16.789	0.92081				16.119	0.884063
			22.266	0.756356			80.745	2.74284				20.883	1.13447			17.422	0.946453				16.333	1.96781			10.602	1.27733							38.661	1.68007			10.861	0.471979				16.964	0.930408				22.701	1.24506
			22.048	0.748951			72.996	2.47961				17.219	0.935425			24.506	1.33129				11.747	1.41528			4.601	0.554331							27.111	1.17814			6.372	0.276904				13.852	0.759727				10.507	0.576267
			28.161	0.956604			72.044	2.44727				17.221	0.935533			25.462	1.38323				13.226	1.59348			11.557	1.39239							34.793	1.51198			13.493	0.586356				14.191	0.77832				11.1	0.608791
			26.396	0.896649			74.36	2.52594				16.884	0.917226			25.735	1.39806				12.135	1.46203			7.222	0.87011							38.393	1.66842			4.979	0.216369				17.723	0.972036				16.407	0.899858
			24.733	0.840158			78.678	2.67262				14.28	0.775763			25.858	1.40474				6.762	0.814689			6.553	0.789509							33.918	1.47395			8.069	0.350649				15.203	0.833824				11.317	0.620692
			28.236	0.959152			74.88	2.54361				19.094	1.03728			25.343	1.37676				11.945	1.43914			6.045	0.728305							32.106	1.39521			11.097	0.482235				14.618	0.801739				21.839	1.19778
			23.842	0.809892			80.959	2.75011				16.156	0.877677			25.37	1.37823				16.066	1.93564			15.995	1.92709							39.178	1.70253			7.123	0.309539				16.85	0.924155				9.972	0.546924
			23.843	0.809926			18.512	0.628836				20.818	1.13094			30.741	1.67001				9.841	1.18565			11.891	1.43263							30.851	1.34067			12.712	0.552417				13.11	0.719031				5.071	0.278124
			30.51	1.0364			52.205	1.77336				17.104	0.929177			23.774	1.29153				13.785	1.66082			13.739	1.65528							32.918	1.4305			6.467	0.281032				14.846	0.814244				13.383	0.734004
			26.799	0.910339			57.399	1.94979				20.853	1.13284			20.616	1.11997				7.932	0.955651			10.49	1.26384							34.994	1.52071			8.249	0.358471				15.315	0.839967				9.895	0.542701
			24.001	0.815293			64.006	2.17423				14.74	0.800753			22.821	1.23975				17.275	2.0813			17.437	2.10082							32.895	1.4295			12.923	0.561586				11.351	0.622557				11.818	0.64817
			28.11	0.954872			69.93	2.37546				13.062	0.709595			19.564	1.06282				10.973	1.32203			17.032	2.05202							28.214	1.22608			12.263	0.532905				16.571	0.908853				9.189	0.50398
			28.159	0.956537			79.577	2.70316				14.12	0.767071			26.712	1.45113				10.09	1.21565			15.362	1.85082							36.121	1.56969			7.252	0.315145				13.464	0.738447				15.786	0.865799
			21.598	0.733665			82.914	2.81652				28.202	1.53208			32.881	1.78627				11.215	1.35119			17.662	2.12793							32.428	1.4092			12.265	0.532992				13.756	0.754462				11.09	0.608242
			27.826	0.945225			54.219	1.84177				24.237	1.31668			30.449	1.65415				10.693	1.2883											35.566	1.54557			7.171	0.311625				16.19	0.887957				16.809	0.921907
			20.364	0.691747			73.975	2.51287				14.448	0.78489			23.188	1.25969				11.235	1.3536											33.787	1.46826			23.242	1.01001				13.162	0.721883				10.972	0.60177
			21.477	0.729555			73.614	2.5006				24.497	1.3308			11.987	0.651195				17.195	2.07166											27.583	1.19866			12.355	0.536903				15.422	0.845835				6.535	0.358419
			29.3	0.995295			75.24	2.55584				18.486	1.00425			28.799	1.56451				13.607	1.63938											33.866	1.47169			15.343	0.666751				14.921	0.818357				23.059	1.26469
			31.303	1.06334			71.305	2.42217				27.97	1.51947			23.505	1.27691				7.844	0.945049											21.098	0.916842			16.183	0.703254				19.779	1.0848				8.789	0.482042
			25.25	0.85772			75.135	2.55227				21.903	1.18988			25.945	1.40947				9.973	1.20155											34.533	1.50068			19.639	0.853439				17.046	0.934905				24.724	1.35601
			26.212	0.890399			71.202	2.41867				23.336	1.26773			24.611	1.337				6.07	0.731317											31.952	1.38852			12.647	0.549592				16.897	0.926733				21.509	1.17968
			26.554	0.902016			87.717	2.97967				21.409	1.16305			22.047	1.19771				5.892	0.709871											29.165	1.2674			11.366	0.493925				17.796	0.97604				22.602	1.23963
			22.306	0.757715			82.109	2.78917				31.531	1.71293			18.562	1.00838				8.1	0.975892											34.705	1.50815			13.392	0.581967				15.521	0.851265				22.467	1.23223
			25.694	0.872803			54.38	1.84724				41.538	2.25656			7.127	0.387175				9.133	1.10035											36.782	1.59841			11.185	0.486059				15.2	0.833659				15.886	0.871284
			28.899	0.981674			34.695	1.17856				32.514	1.76633			10.781	0.585679				5.641	0.679631											36.103	1.5689			15.88	0.690087				15.491	0.84962				21.164	1.16076
			23.965	0.81407			105.282	3.57634				32.014	1.73917			6.807	0.369791				8.335	1.00421											36.601	1.59055			9.328	0.405361				12.44	0.682284				12.32	0.675703
			24.748	0.840668			89.255	3.03191				34.914	1.89671			19.741	1.07243				6.922	0.833966											28.639	1.24455			17.829	0.774783				10.433	0.572208				20.035	1.09884
			28.951	0.98344			85.475	2.90351				22.776	1.23731			21.901	1.18977				8.043	0.969025											34.026	1.47865			11.668	0.507048				15.449	0.847316				18.512	1.01531
			24.805	0.842604			90.089	3.06024				29.69	1.61291			9.13	0.495989				7.654	0.922158											35.35	1.53618			18.671	0.811373				15.324	0.84046				6.56	0.35979
			27.154	0.922398			64.489	2.19063				28.807	1.56494			20.026	1.08792				8.454	1.01854											32.347	1.40568			4.584	0.199204				15.511	0.850716				16.655	0.91346
			29.381	0.998047			20.139	0.684104				22.254	1.20895			5.879	0.319378				8.504	1.02457											33.324	1.44814			15.32	0.665751				14.963	0.820661				19.663	1.07844
			24.342	0.826876			77.244	2.62391				38.499	2.09146			5.734	0.3115				7.852	0.946013											27.269	1.18501			24.652	1.07129				17.459	0.957556				16.261	0.891851
			22.494	0.764101			78.571	2.66899				26.222	1.42451			25.986	1.41169				7.447	0.897218											30.217	1.31312			14.283	0.620687				20.147	1.10498				13.134	0.720347
			29.075	0.987652			73.529	2.49772				24.554	1.3339			19.955	1.08406				6.707	0.808063											38.722	1.68272			5.615	0.244007				20.484	1.12347				20.304	1.11359
			24.851	0.844167			17.302	0.587734				32.875	1.78594			27.202	1.47775				7.428	0.894929											37.143	1.6141			9.624	0.418224				14.918	0.818193				15.924	0.873368
			23.758	0.807038			82.124	2.78968				26.603	1.44521			21.722	1.18005				6.52	0.785533											39.651	1.72309			11.263	0.489449				12.12	0.664734				14.225	0.780184
			23.775	0.807616			87.455	2.97077				30.096	1.63497			29.503	1.60275				7.784	0.93782											35.204	1.52984			15.039	0.65354				14.3	0.784298				12.901	0.707568
			23.508	0.798546			89.543	3.0417				32.83	1.78349			24.859	1.35047				8.741	1.05312											27.531	1.1964			4.754	0.206591				12.252	0.671973				9.567	0.524712
			29.76	1.01092			60.297	2.04824				36.795	1.99889			27.081	1.47118				9.012	1.08577											24.718	1.07415			17.114	0.743712				16.665	0.914009				15.541	0.852362
			19.397	0.658899			47.016	1.59709				19.636	1.06673			25.953	1.4099				8.673	1.04493											34.358	1.49307			4.342	0.188687				13.053	0.715905				11.932	0.654423
			23.116	0.78523			79.702	2.70741				23.754	1.29044			28.39	1.54229				9.704	1.16914											36.694	1.59459			14.919	0.648325				14.775	0.81035				12.866	0.705649
			25.077	0.851844			89.324	3.03426				30.161	1.6385			24.287	1.31939				8.364	1.0077											24.59	1.06859			10.871	0.472414				17.753	0.973681				16.955	0.929914
			22.644	0.769197			87.216	2.96265				30.515	1.65773			34.776	1.88921				8.286	0.998302											30.428	1.32229			27.378	1.18975				14.016	0.768722				14.064	0.771354
			24.704	0.839173			104.44	3.54774				22.727	1.23465			29.844	1.62128				7.946	0.957338											34.147	1.4839			14.744	0.64072				12.309	0.6751				14.84	0.813915
			25.691	0.872701			78.345	2.66131				40.399	2.19468			25.4	1.37986				8.448	1.01782											29.948	1.30143			13.554	0.589007				8.846	0.485168				16.668	0.914173
			24.299	0.825416			60.784	2.06478				26.353	1.43163			31.037	1.68609				8.746	1.05372											25.191	1.09471			6.798	0.295416				15.778	0.86536				9.434	0.517417
			29.42	0.999372			87.739	2.98042				25.245	1.37144			27.462	1.49188				9.208	1.10938											25.082	1.08997			9.981	0.433738				14.015	0.768667				8.69	0.476612
			23.988	0.814851			65.726	2.23265				26.91	1.46189			26.339	1.43087				8.73	1.05179											35.723	1.55239			16.775	0.72898				13.831	0.758575				9.381	0.51451
			26.888	0.913362			87.065	2.95752				35.481	1.92751			14.243	0.773753				8.927	1.07553											37.037	1.60949			14.635	0.635983				14.832	0.813476				16.539	0.907098
			22.24	0.755473			71.291	2.42169				32.484	1.7647			32.193	1.74889				6.539	0.787822											27.851	1.2103			3.356	0.145839				14.269	0.782598				17.55	0.962547
			21.493	0.730098			73.177	2.48576				15.337	0.833185			19.485	1.05853				8.841	1.06517											25.705	1.11705			17.367	0.754706				13.758	0.754571				16.519	0.906001
			25.815	0.876913			107.268	3.6438				24.884	1.35183			10.299	0.559495				8.111	0.977217											27.701	1.20378			18.077	0.78556				13.27	0.727807				7.948	0.435916
			24.225	0.822902			99.439	3.37786				10.548	0.573022			21.502	1.1681				10.909	1.31432											36.354	1.57981			25.989	1.12939				11.671	0.640108				8.05	0.44151
			23.867	0.810741			87.531	2.97335				28.792	1.56413			19.237	1.04505				12.576	1.51516											26.555	1.15398			9.431	0.409837				15.863	0.870022				12.033	0.659962
			31.888	1.08321			49.892	1.69479				15.498	0.841931			28.482	1.54729				8.454	1.01854											31.068	1.3501			20.551	0.893071				14.443	0.792141				7.062	0.387323
			24.982	0.848617			69.734	2.3688				28.649	1.55636			29.293	1.59135				11.603	1.39794											24.148	1.04938			11.384	0.494707				11.931	0.654368				12.442	0.682394
			21.44	0.728298			74.638	2.53539				25.741	1.39838			24.185	1.31385				11.956	1.44047											10.353	0.449903			19.953	0.867084				10.871	0.596231				11.229	0.615866
			35.86	1.21813			95.599	3.24741				18.708	1.01631			32.3	1.7547				7.865	0.947579											35.736	1.55296			4.79	0.208156				11.861	0.650529				10.07	0.552299
			26.536	0.901405			95.473	3.24313				47.503	2.58061			34.683	1.88416				7.46	0.898785											23.238	1.00984			16.115	0.700299				10.586	0.5806				12.565	0.68914
			20.538	0.697658			61.385	2.08519				37.702	2.04817			29.93	1.62595				11.568	1.39372											34.616	1.50428			14.374	0.624641				12.276	0.67329				10.024	0.549776
			33.598	1.14129			49.614	1.68534				42.606	2.31458			12.836	0.697318				8.352	1.00625											39.321	1.70875			6.685	0.290506				13.821	0.758027				18.945	1.03906
			23.8	0.808465			64.115	2.17793				37.961	2.06224			29.346	1.59423				12.236	1.4742											45.152	1.96214			21.02	0.913452				17.659	0.968526				10.421	0.57155
			21.96	0.745962			34.047	1.15655				36.055	1.95869			18.745	1.01832				11.35	1.36745											28.943	1.25776			12.793	0.555937				14.13	0.774974				8.446	0.463229
			28.765	0.977122			81.137	2.75615				33.851	1.83896			27.611	1.49997				9.782	1.17854											26.383	1.14651			8.347	0.36273				14.75	0.808979				10.265	0.562994
			21.119	0.717394			100.776	3.42327								23.741	1.28973				12.291	1.48083											36.292	1.57712			16.617	0.722114				17.086	0.937099				8.306	0.455551
			21.981	0.746675			75.906	2.57846								19.588	1.06412				7.32	0.881917											41.991	1.82477			16.245	0.705948				13.314	0.73022				10.536	0.577858
			21.948	0.745554			64.508	2.19128								38.171	2.07365				8.389	1.01071											35.107	1.52562			7.684	0.333918				16.132	0.884776				10.613	0.582081
			20.678	0.702414			68.885	2.33996								19.869	1.07939				12.988	1.5648											21.94	0.953432			6.5	0.282466				13.451	0.737734				13.411	0.73554
			34.724	1.17954			46.253	1.57117								28.155	1.52952				11.445	1.3789											42.439	1.84424			16.455	0.715074				14.169	0.777113				8.218	0.450725
			34.325	1.16599			32.254	1.09564								8.642	0.469478				7.533	0.90758											22.205	0.964948			17.583	0.764093				16.746	0.918451				9.542	0.523341
			23.549	0.799939			67.126	2.28021								41.851	2.27356				12.04	1.45059											40.346	1.75329			5.95	0.258565				15.276	0.837828				15.898	0.871942
			21.179	0.719432			63.761	2.16591								12.968	0.704488				15.537	1.87191											46.436	2.01794			4.878	0.21198				13.945	0.764828				9.031	0.495314
			32.106	1.09061			50.968	1.73134								30.812	1.67387				12.18	1.46745											23.838	1.03591			9.683	0.420788				10.305	0.565188				10.828	0.593873
			27.392	0.930482			62.151	2.11121								33.968	1.84532				17.457	2.10323											21.173	0.920101			11.017	0.478758				13.722	0.752597				16.09	0.882472
			23.89	0.811522			63.396	2.15351								27.402	1.48862				9.471	1.14107											41.612	1.8083			7.723	0.335613				12.621	0.692211				6.765	0.371033
			25.8	0.876403			69.152	2.34903								35.445	1.92555				12.589	1.51673											40.648	1.76641			8.166	0.354864				12.169	0.667421				13.855	0.759891
			21.523	0.731117			70.425	2.39228								14.026	0.761964				13.489	1.62516											41.961	1.82347			13.375	0.581228				10.947	0.600399				10.211	0.560033
			21.609	0.734039			72.056	2.44768								44.028	2.39183				14.117	1.70082											42.103	1.82964			14.65	0.636635				15.569	0.853898				14.381	0.78874
			19.77	0.67157			60.39	2.0514								26.874	1.45993				12.123	1.46059											36.558	1.58868			16.309	0.708729				11.052	0.606158				13.373	0.733456
			30.318	1.02988			65.735	2.23296								15.23	0.827372				11.344	1.36673											31.864	1.38469			9.46	0.411097				12.784	0.701151				14.033	0.769654
			20.198	0.686108			77.075	2.61817								45.602	2.47734				12.712	1.53155											34.891	1.51623			15.951	0.693172				10.946	0.600344				11.898	0.652558
			26.877	0.912988			52.665	1.78898								34.104	1.8527				12.299	1.48179											43.296	1.88149			16.775	0.72898				12.795	0.701755				7.138	0.391491
			27.086	0.920088			67.444	2.29101								19.422	1.0551				10.323	1.24372											39.449	1.71431			7.682	0.333832				12.858	0.70521				8.316	0.456099
			21.652	0.735499			74.596	2.53396								21.417	1.16348				9.315	1.12228											33.471	1.45453			12.036	0.52304				10.729	0.588443				15.215	0.834482
			23.974	0.814376			52.391	1.77968								12.239	0.664885				11.473	1.38227											33.895	1.47295			13.737	0.59696				13.206	0.724296				23.3	1.27791
			19.151	0.650543			34.579	1.17462								51.401	2.79237				8.986	1.08264											45.405	1.97313			15.509	0.673964				10.594	0.581039				10.606	0.581697
			39.354	1.33682			101.884	3.46091								12.545	0.681509				14.232	1.71468											39.434	1.71366			13.198	0.573537				9.85	0.540233				16.119	0.884063
			28.464	0.966897			88.244	2.99757								22.784	1.23774				10.387	1.25143											32.507	1.41264			10.142	0.440734				13.554	0.743383				21.079	1.1561
			31	1.05304			83.467	2.8353								13.618	0.7398				13.553	1.63287											43.197	1.87718			15.566	0.676441				14.277	0.783036				9.812	0.538149
			20.203	0.686278			48.426	1.64499								22.109	1.20107				12.827	1.5454											25.253	1.0974			17.655	0.767222				13.948	0.764992				10.997	0.603142
			21.632	0.73482			93.497	3.17601								22.191	1.20553				11.661	1.40492											24.698	1.07328			7.989	0.347173				11.083	0.607858				4.191	0.22986
			28.824	0.979126			87.108	2.95898								37.368	2.03002				13.784	1.6607											39.076	1.6981			14.662	0.637157				11.706	0.642027				10.025	0.549831
			22.995	0.78112			61.352	2.08407								26.48	1.43853				12.78	1.53974											38.021	1.65225			4.586	0.199291				15.226	0.835085				12.682	0.695557
			20.478	0.69562			35.249	1.19738								35.414	1.92387				13.406	1.61516											30.177	1.31138			15.73	0.683568				12.146	0.66616				9.266	0.508203
			24.771	0.841449			75.053	2.54948								15.301	0.831229				12.148	1.4636											33.046	1.43606			5.116	0.222323				14.125	0.7747				10.806	0.592666
			23.038	0.782581			103.518	3.51642								25.135	1.36546				12	1.44577											46.112	2.00386			14.145	0.61469				14.72	0.807333				14.286	0.78353
			24.67	0.838018			75.874	2.57737								24.084	1.30837				11.561	1.39288											37.883	1.64626			15.448	0.671313				21.836	1.19762				16.369	0.897774
			30.763	1.04499			71.906	2.44258								27.759	1.50801				12.233	1.47384											37.97	1.65004			15.002	0.651932				26.845	1.47234				6.292	0.345091
			32.425	1.10145			97.708	3.31906								20.613	1.1198				13.186	1.58866											36.06	1.56704			15.087	0.655626				46.99	2.57721				21.095	1.15698
			23.547	0.799871			80.687	2.74087								16.863	0.916085				11.738	1.4142											39.234	1.70497			12.222	0.531123				15.068	0.82642				23.636	1.29634
			23.786	0.80799			112.578	3.82418								25.317	1.37535				11.83	1.42528											45.23	1.96553			6.886	0.29924				25.8	1.41503				22.044	1.20903
			33.584	1.14082			90.595	3.07743								24.232	1.31641				14.927	1.79841											42.503	1.84702			8.691	0.377679				25.109	1.37713				22.386	1.22778
			23.524	0.79909			16.601	0.563921								29.01	1.57597				13.379	1.61191											22.33	0.97038			12.072	0.524605				19.587	1.07427				21.565	1.18275
			25.914	0.880276			79.414	2.69762								19.604	1.06499				8.247	0.993603											39.487	1.71596			10.565	0.459116				27.923	1.53147				4.727	0.259257
			20.414	0.693446			83.02	2.82012								27.701	1.50486				11.514	1.38721											41.831	1.81782			11.299	0.491013				17.211	0.943955				3.737	0.20496
			22.806	0.7747			86.999	2.95528								23.893	1.29799				13.719	1.65287											40.008	1.7386			16.381	0.711858				44.722	2.45282				4.751	0.260573
			29.739	1.01021			77.677	2.63862								31.901	1.73303				12.604	1.51854											26.528	1.15281			13.654	0.593353				17.249	0.946039				2.397	0.131466
			30.461	1.03473			87.62	2.97637								15.122	0.821505				13.018	1.56842											36.817	1.59993			7.711	0.335092				12.249	0.671809				18.064	0.990738
			25.818	0.877015			88.399	3.00284								33.922	1.84282				11.577	1.3948											30.063	1.30643			18.414	0.800205				20.126	1.10383				14.904	0.817425
			34.45	1.17024			99.129	3.36733								29.309	1.59222				15.437	1.85986											41.581	1.80696			11.852	0.515044				10.389	0.569795				13.222	0.725174
			17.906	0.608251			99.703	3.38682								11.341	0.616101				12.627	1.52131											20.073	0.872299			8.994	0.390846				15.394	0.844299				8.28	0.454125
			26.653	0.905379			78.343	2.66124								22.368	1.21514				11.134	1.34143											21.047	0.914625			11.794	0.512524				15.602	0.855707				9.738	0.53409
			23.797	0.808363			83.249	2.8279								21.807	1.18467				11.167	1.34541											35.641	1.54883			3.946	0.171479				14.506	0.795596				9.056	0.496685
			26.16	0.888632			86.53	2.93935								31.116	1.69038				11.686	1.40794											45.019	1.95636			13.334	0.579447				24.232	1.32903				16.074	0.881595
			30.989	1.05267			89.292	3.03317								20.177	1.09612				11.205	1.34998											44.669	1.94115			4.419	0.192034				14.103	0.773493				8.32	0.456319
			24.224	0.822868			70.953	2.41021								8.954	0.486427				8.572	1.03276											32.774	1.42424			14.88	0.64663				36.153	1.98285				11.574	0.634788
			30.731	1.04391			103.074	3.50133								27.245	1.48009				19.054	2.29564											41.151	1.78827			18.692	0.812286				15.215	0.834482				11.315	0.620583
			27.117	0.921141			94.383	3.20611								24.055	1.30679				10.01	1.20601											32.803	1.4255			11.851	0.515001				12.214	0.669889				6.853	0.37586
			29.648	1.00712			85.562	2.90647								23.217	1.26127				8.763	1.05577											40.013	1.73882			14.479	0.629204				27.217	1.49274				10.153	0.556852
			28.329	0.962311			67.658	2.29828								19.158	1.04076				8.059	0.970952											18.107	0.786864			10.696	0.464809				17.911	0.982347				12.931	0.709214
			23.433	0.795998			73.902	2.51039								34.056	1.8501				12.034	1.44986											43.471	1.88909			7.67	0.33331				24.362	1.33616				10.312	0.565572
			24.774	0.841551			91.015	3.0917								39.636	2.15323				10.002	1.20505											43.73	1.90035			13.412	0.582836				11.031	0.605006				10.044	0.550873
			23.333	0.792602			93.365	3.17153								32.072	1.74232				11.59	1.39637											44.56	1.93641			11.075	0.481279				16.419	0.900517				3.122	0.171229
			23.279	0.790767			95.497	3.24395								25.094	1.36324				10.239	1.2336											48.401	2.10333			11.795	0.512567				35.138	1.92718				11.047	0.605884
			30.824	1.04706			92.823	3.15312								31.81	1.72808				10.017	1.20685											39.895	1.73369			16.035	0.696822				9.219	0.505625				10.275	0.563543
			23.859	0.810469			71.16	2.41724								23.435	1.27311				13.77	1.65902											30.608	1.33011			15.573	0.676745				13.359	0.732688				3.432	0.188232
			22.074	0.749834			29.252	0.993665								32.788	1.78121				10.1	1.21685											34.098	1.48177			17.274	0.750665				28.486	1.56234				9.514	0.521805
			19.164	0.650984			75.295	2.55771								16.095	0.874363				9.36	1.1277											41.53	1.80474			11.793	0.512481				26.983	1.47991				8.265	0.453302
			23.41	0.795217			68.329	2.32108								24.032	1.30554				24.738	2.98045											18.685	0.811982			5.932	0.257783				25.882	1.41952				10.81	0.592885
			23.041	0.782683			95.086	3.22999								13.744	0.746645				8.992	1.08336											39.793	1.72926			12.118	0.526604				13.476	0.739105				10.132	0.5557
			23.917	0.812439			47.366	1.60898								35.352	1.9205				9.626	1.15975											37.954	1.64934			15.957	0.693433				25.273	1.38612				14.039	0.769983
			26.234	0.891146			78.143	2.65445								42.263	2.29594				8.65	1.04216											44.828	1.94806			14.438	0.627423				36.646	2.00989				8.898	0.48802
			25.264	0.858196			81.002	2.75157								12.139	0.659453				8.214	0.989627											40.635	1.76585			11.19	0.486276				8.478	0.464984				12.461	0.683436
			20.965	0.712163			78.198	2.65632								22.889	1.24345				10.872	1.30986											37.723	1.6393			17.918	0.778651				14.477	0.794006				9.006	0.493943
			18.782	0.638008			77.915	2.6467								14.363	0.780272				10.285	1.23914											33.426	1.45257			5.788	0.251525				20.635	1.13175				13.91	0.762908
			28.038	0.952426			57.192	1.94276								33.655	1.82831				6.464	0.778786											25.054	1.08875			13.265	0.576448				20.034	1.09878				16.055	0.880553
			30.486	1.03558			58.592	1.99032								25.359	1.37763				7.823	0.942519											28.125	1.22221			16.366	0.711206				15.141	0.830423				12.434	0.681955
			25.509	0.866518			89.356	3.03534								34.779	1.88937				8.512	1.02553											32.799	1.42532			14.988	0.651324				31.332	1.71844				13.208	0.724406
			22.226	0.754998			76.071	2.58407								23.594	1.28175				7.515	0.905411											22.368	0.972031			14.642	0.636288				21.942	1.20343				9.215	0.505406
			21.935	0.745113			56.952	1.93461								28.484	1.5474				7.563	0.911194											31.835	1.38343			13.442	0.58414				12.323	0.675867				10.56	0.579174
			26.695	0.906806			29.258	0.993869								33.623	1.82657				5.315	0.640354											26.474	1.15046			15.562	0.676267				19.11	1.04811				6.305	0.345804
			24.719	0.839683			32.534	1.10515								32.88	1.78621				5.476	0.659751											38.09	1.65525			15.192	0.660189				18.885	1.03577				11.204	0.614495
			27.455	0.932622			41.669	1.41546								24.61	1.33694				6.409	0.77216											35.324	1.53505			12.509	0.543595				14.874	0.81578				8.513	0.466904
			26.503	0.900284			28.832	0.979398								32.064	1.74188				5.625	0.677703											34.94	1.51836			11.514	0.500356				33.5	1.83734				13.021	0.71415
			22.457	0.762845			96.98	3.29433								40.08	2.17735				6.978	0.840713											17.397	0.75601			8.344	0.3626				11.597	0.636049				12.52	0.686672
			26.606	0.903782			31.994	1.08681								35.056	1.90442				5.542	0.667703											27.888	1.21191			18.057	0.784691				12.39	0.679542				10.6	0.581368
			30.803	1.04635			77.134	2.62017								45.772	2.48657				4.991	0.601318											27.156	1.1801			17.092	0.742756				12.713	0.697257				13.035	0.714918
			22.08	0.750038			97.085	3.29789								11.791	0.640548				5.683	0.684691											37.78	1.64178			13.069	0.567931				12.617	0.691992				11.253	0.617182
			35.89	1.21915			10.595	0.359903								32.618	1.77198				5.351	0.644691											18.786	0.816371			10.678	0.464027				17.1	0.937867				12.127	0.665118
			37.952	1.2892			71.074	2.41432								22.706	1.23351				9.459	1.13963											37.479	1.6287			13.5	0.58666				26.123	1.43274				10.047	0.551038
			27.947	0.949335			49.055	1.66636								25.507	1.38567				6.324	0.761919											48.916	2.12571			14.516	0.630812				15.791	0.866073				11.114	0.609559
			28.313	0.961768			66.178	2.24801								22.394	1.21656				10.322	1.2436											26.389	1.14677			13.93	0.605347				13.477	0.73916				14.418	0.79077
			43.357	1.4728			63.336	2.15147								23.593	1.28169				10.673	1.28589											30.527	1.32659			16.755	0.728111				12.22	0.670218				11.022	0.604513
			22.551	0.766038			65.88	2.23789								44.394	2.41171				4.691	0.565174											38.035	1.65286			5.256	0.228406				9.218	0.505571				12.188	0.668463
			30.976	1.05223			67.306	2.28633								38.891	2.11276				9.627	1.15987											38.13	1.65699			11.901	0.517174				37.378	2.05003				7.174	0.393465
			32.656	1.1093			41.344	1.40442								29.618	1.609				10.189	1.22758											22.385	0.97277			16.826	0.731196				26.104	1.4317				6.416	0.351892
			22.311	0.757885			68.615	2.33079								26.924	1.46265				6.704	0.807701											24.076	1.04625			13.329	0.579229				16.894	0.926568				7.308	0.400815
			27.449	0.932418			51.855	1.76147								26.492	1.43918				9.431	1.13625											23.656	1.028			12.174	0.529037				15.386	0.843861				9.132	0.500854
			25.74	0.874365			43.981	1.494								40.096	2.17822				10.799	1.30107											27.182	1.18123			13.132	0.570669				14.873	0.815725				14.747	0.808814
			28.183	0.957352			42.304	1.43703								34.99	1.90084				10.681	1.28685											28.764	1.24998			13.305	0.578187				18.237	1.00023				9.308	0.510507
			7.275	0.247125			56.692	1.92578								20.516	1.11453				3.866	0.465778											27.07	1.17636			8.71	0.378505				11.729	0.643289				9.537	0.523066
			24.579	0.834927			55.733	1.8932								29.208	1.58673				9.081	1.09408											22.983	0.998757			14.277	0.620426				31.395	1.72189				11.46	0.628535
			24.491	0.831938			41.397	1.40622								26.997	1.46662				5.205	0.627101											28.074	1.21999			11.075	0.481279				10.526	0.577309				10.136	0.555919
			27.635	0.938737			16.603	0.563989								30.395	1.65121				4.127	0.497223											27.238	1.18366			14.444	0.627683				17.422	0.955527				10.005	0.548734
			26.045	0.884726			48.753	1.6561								21.974	1.19374				6.524	0.786015											29.514	1.28257			22.662	0.984807				10.768	0.590582				10.429	0.571989
			35.327	1.20003			60.298	2.04827								30.299	1.646				5.321	0.641077											21.92	0.952563			20.912	0.908759				26.354	1.44541				7.164	0.392917
			35.668	1.21161			36.359	1.23508								33.688	1.83011				4.512	0.543608											21.212	0.921796			16.026	0.696431				35.287	1.93535				9.371	0.513962
			22.692	0.770827			29.184	0.991355								23.763	1.29093				5.701	0.686859											21.618	0.939439			19.243	0.83623				15.033	0.8245				10.797	0.592172
			35.064	1.19109			50.761	1.72431								23.123	1.25616				9.431	1.13625											27.748	1.20583			10.559	0.458855				10.587	0.580655				9.179	0.503432
			36.32	1.23376			52.201	1.77322								16.498	0.896256				9.613	1.15818											28.817	1.25228			17.264	0.75023				16.152	0.885873				9.446	0.518075
			30.806	1.04645			47.812	1.62413								28.29	1.53686				9.194	1.1077											23.897	1.03848			19.055	0.82806				18.269	1.00198				4.737	0.259806
			37.598	1.27717			58.596	1.99045								33.072	1.79664				8.907	1.07312											24.793	1.07741			14.625	0.635549				28.085	1.54035				12.623	0.692321
			36.24	1.23104			38.483	1.30723								27.63	1.501				9.638	1.16119											28.254	1.22782			12.58	0.546681				19.485	1.06867				9.696	0.531787
			34.926	1.18641			32.17	1.09279								35	1.90138				3.624	0.436621											23.387	1.01631			13.528	0.587877				10.396	0.570179				11.732	0.643453
			23.768	0.807378			43.187	1.46702								43.246	2.34935				3.528	0.425055											26.049	1.13199			14.222	0.618036				8.351	0.458019				5.596	0.306918
			34.934	1.18668			39.623	1.34596								30.779	1.67207				9.758	1.17565											24.541	1.06646			14.928	0.648716				17.815	0.977082				8.86	0.485936
			32.144	1.0919			38.067	1.2931								41.871	2.27465				4.701	0.566379											35.108	1.52566			14.723	0.639808				10.312	0.565572				11.26	0.617566
			33.295	1.131			38.172	1.29667								31.754	1.72504				9.31	1.12167											30.89	1.34237			14.574	0.633333				13.781	0.755833				4.493	0.246423
			24.822	0.843182			38.451	1.30615								26.406	1.43451				3.861	0.465175											30.444	1.32298			16.743	0.727589				14.173	0.777332				13.26	0.727258
			25.89	0.879461			73.334	2.49109								39.626	2.15269				9.117	1.09842											23.006	0.999756			15.068	0.6548				15.203	0.833824				14.843	0.814079
			24.641	0.837033			21.188	0.719738								44.595	2.42263				4.211	0.507343											26.483	1.15085			10.945	0.47563				14.225	0.780184				10.505	0.576157
			21.292	0.723271			45.171	1.53442								31.639	1.71879				8.325	1.003											24.66	1.07163			16.424	0.713727				14.973	0.821209				11.709	0.642192
			36.586	1.24279			49.638	1.68616								39.79	2.1616				9.38	1.13011											24.551	1.0669			18.768	0.815588				13.368	0.733181				15.571	0.854007
			33.232	1.12886			67.151	2.28106								45.154	2.453				3.99	0.480717											25.386	1.10318			15.427	0.670401				13.052	0.71585				9.047	0.496192
			30.291	1.02896			30.836	1.04747								20.79	1.12942				9.271	1.11697											26.074	1.13308			15.716	0.68296				14.397	0.789618				6.457	0.354141
			34.617	1.17591			58.667	1.99287								33.806	1.83652				7.852	0.946013											26.52	1.15246			18.003	0.782344				11.889	0.652064				13.879	0.761208
			25.86	0.878442			43.948	1.49287								37.714	2.04882				9.414	1.1342											28.156	1.22356			12.565	0.546029				14.51	0.795816				4.824	0.264577
			26.489	0.899808			42.704	1.45062								37.552	2.04002				9.568	1.15276											24.744	1.07528			14.67	0.637504				15.501	0.850168				13.249	0.726655
			23.71	0.805408			42.756	1.45238								23.799	1.29288				4.13	0.497585											25.297	1.09931			10.765	0.467807				10.769	0.590637				9.863	0.540946
			35.591	1.209			56.043	1.90373								23.007	1.24986				5.028	0.605776											27.533	1.19648			16.464	0.715465				13.355	0.732468				8.372	0.459171
			35.734	1.21385			26.82	0.911052								29.152	1.58369				3.289	0.39626											32.106	1.39521			8.328	0.361904				16.789	0.92081				10.674	0.585426
			36.208	1.22995			31.006	1.05325								24.701	1.34189				6.303	0.759389											16.681	0.724895			15.764	0.685046				15.646	0.858121				3.387	0.185763
			28.308	0.961598			47.847	1.62532								41.219	2.23923				7.94	0.956615											24.706	1.07363			11.507	0.500052				14.86	0.815012				15.035	0.82461
			29.409	0.998998			37.995	1.29066								30.72	1.66887				3.949	0.475778											29.052	1.26249			10.086	0.438301				11.45	0.627987				2.424	0.132947
			24.653	0.837441			39.924	1.35618								33.971	1.84548				4.62	0.55662											26.808	1.16498			9.721	0.422439				10.423	0.57166				2.656	0.145671
			33.101	1.12441			39.467	1.34066								21.551	1.17076				4.992	0.601439											22.138	0.962036			12.466	0.541727				10.376	0.569082				4.006	0.219713
			24.16	0.820694			44.699	1.51839								35.069	1.90513				10.696	1.28866											25.305	1.09966			8.146	0.353995				14.144	0.775742				2.348	0.128778
			26.696	0.90684			53.946	1.8325								32.674	1.77502				4.064	0.489633											22.067	0.958951			10.112	0.43943				13.826	0.758301				1.892	0.103769
			26.347	0.894984			45.705	1.55256								34.151	1.85526				3.868	0.466019											26.622	1.15689			17.369	0.754793				15.172	0.832124				4.711	0.25838
			26.31	0.893728			43.931	1.4923								25.473	1.38382				11.283	1.35938											27.26	1.18462			12.515	0.543856				13.279	0.7283				2.477	0.135854
			24.532	0.833331			34.69	1.17839								34.62	1.88074				8.848	1.06601											25.053	1.08871			18.242	0.79273				12.041	0.660401				4.947	0.271323
			25.055	0.851096			42.981	1.46003								27.293	1.4827				7.114	0.857098											23.831	1.03561			17.152	0.745363				14.661	0.804097				4.603	0.252456
			26.391	0.896479			33.387	1.13413								22.783	1.23769				3.397	0.409272											17.362	0.754489			10.77	0.468025				11.82	0.64828				4.002	0.219494
			30.206	1.02607			18.096	0.614705								48.623	2.64145				3.383	0.407586											26.054	1.13221			16.514	0.717638				14.782	0.810734				5.04	0.276424
			25.782	0.875792			43.054	1.46251								30.076	1.63388				5.914	0.712522											16.924	0.735455			11.348	0.493142				15.517	0.851046				3.241	0.177756
			30.38	1.03198			50.83	1.72665								34.851	1.89329				6.528	0.786497											19.713	0.856655			11.543	0.501616				14.292	0.783859				5.692	0.312183
			25.983	0.88262			39.766	1.35082								43.148	2.34402				2.992	0.360478											22.691	0.986068			11.63	0.505397				12.447	0.682668				6.644	0.364397
			22.471	0.76332			44.492	1.51135								40.695	2.21076				9.366	1.12842											24.084	1.0466			15.637	0.679527				14.025	0.769215				4.929	0.270336
			32.817	1.11476			38.169	1.29657								29.126	1.58227				10.126	1.21999											25.541	1.10992			13.96	0.60665				14.197	0.778649				14.601	0.800807
			32.212	1.09421			31.524	1.07084								34.707	1.88546				4.24	0.510837											26.122	1.13517			6.886	0.29924				18.368	1.00741				11.27	0.618115
			25.222	0.856769			33.371	1.13358								40.088	2.17779				11.012	1.32673											19.515	0.84805			13.269	0.576622				11.846	0.649706				4.101	0.224923
			25.997	0.883095			33.396	1.13443								28.505	1.54854				3.145	0.378911											19.529	0.848659			14.106	0.612995				11.569	0.634513				14.752	0.809088
			25.935	0.880989			31.04	1.0544								23.71	1.28805				2.75	0.331321											22.234	0.966208			14.377	0.624772				14.222	0.78002				10.195	0.559155
			28.193	0.957691			34.644	1.17683								34.723	1.88633				7.197	0.867098											23.721	1.03083			18.048	0.7843				15.664	0.859108				11.919	0.65371
			23.113	0.785128			37.47	1.27282								37.448	2.03437				9.237	1.11288											18.567	0.806854			12.043	0.523345				11.276	0.618444				5.952	0.326443
			33.656	1.14326			21.041	0.714744								30.631	1.66403				3.208	0.386501											24.524	1.06572			13.36	0.580577				13.59	0.745357				13.235	0.725887
			29.673	1.00797			28.801	0.978345								26.117	1.41881				11.942	1.43878											27.179	1.1811			18.914	0.821933				13.364	0.732962				2.566	0.140735
			23.312	0.791888			27.598	0.93748								41.935	2.27812				7.886	0.950109											18.742	0.814459			15.841	0.688392				11.191	0.613782				12.764	0.700054
			33.347	1.13277			25.859	0.878408								33.824	1.83749				11.176	1.34649											24.923	1.08306			8.042	0.349476				16.761	0.919274				11.44	0.627438
			30	1.01907			33.633	1.14248								40.415	2.19555				10.144	1.22215											17	0.738758			11.812	0.513306				11.432	0.627				4.318	0.236825
			24.102	0.818724			25.373	0.861899								23.817	1.29386				11.24	1.3542											19.788	0.859914			22.048	0.958125				15.585	0.854775				10.904	0.598041
			23.871	0.810877			32.849	1.11585								31.198	1.69484				3.305	0.398188											13.448	0.584401			16.105	0.699864				15.584	0.85472				3.19	0.174959
			32.388	1.10019			34.875	1.18467								35.947	1.95283				10.294	1.24023											22.15	0.962558			11.124	0.483408				16.105	0.883295				5.148	0.282347
			26.804	0.910508			29.159	0.990506								28.633	1.55549				10.417	1.25505											28.819	1.25237			14.206	0.617341				15.916	0.872929				14.249	0.781501
			26.762	0.909082			14.129	0.47995								41.918	2.2772				2.751	0.331442											22.689	0.985981			10.778	0.468372				21.607	1.18506				3.341	0.183241
			30.974	1.05216			21.181	0.7195								29.924	1.62563				9.337	1.12493											23.38	1.01601			9.952	0.432477				9.885	0.542153				12.605	0.691334
			31.685	1.07631			32.61	1.10773								35.413	1.92382				8.393	1.01119											15.517	0.674312			5.969	0.259391				14.736	0.808211				3.024	0.165854
			30.628	1.04041			28.714	0.975389								49.608	2.69496				9.091	1.09529											17.166	0.745971			13.77	0.598394				15.896	0.871832				12.34	0.6768
			22.922	0.77864			36.058	1.22486								33.509	1.82038				10.301	1.24107											20.169	0.876471			12.443	0.540727				16.208	0.888944				14.138	0.775413
			34.536	1.17316			21.171	0.71916								27.562	1.49731				7.367	0.88758											18.737	0.814241			13.862	0.602392				13.093	0.718099				15.359	0.84238
			28.333	0.962447			17.365	0.589874								40.634	2.20745				8.541	1.02902											21.523	0.935311			18.399	0.799553				12.708	0.696983				12.322	0.675813
			22.633	0.768823			40.895	1.38917								53.849	2.92535				11.45	1.3795											21.819	0.948174			16.484	0.716334				11.482	0.629742				13.247	0.726545
			24.805	0.842604			35.191	1.19541								35.431	1.92479				8.644	1.04143											21.589	0.938179			11.537	0.501356				17.226	0.944777				12.538	0.687659
			30.27	1.02825			44.412	1.50864								49.953	2.7137				9.275	1.11746											18.047	0.784256			13.481	0.585835				10.964	0.601332				12.464	0.683601
			22.06	0.749359			26.923	0.914551								32.027	1.73987				6.079	0.732401											15.54	0.675311			15.69	0.68183				17.157	0.940993				12.312	0.675264
			24.715	0.839547			32.704	1.11093								34.316	1.86422				7.688	0.926254											24.966	1.08493			6.52	0.283335				17.87	0.980098				16.659	0.91368
			28.389	0.964349			32.391	1.10029								49.949	2.71349				7.601	0.915772											19.403	0.843183			14.265	0.619905				11.743	0.644057				10.438	0.572483
			33.173	1.12686			32.393	1.10036								34.276	1.86205				6.974	0.840231											18.356	0.797684			15.564	0.676354				12.702	0.696654				12.469	0.683875
			27.562	0.936257			29.586	1.00501								42.359	2.30116				4.813	0.579873											23.641	1.02735			9.966	0.433086				13.061	0.716344				20.087	1.10169
			32.445	1.10213			25.979	0.882484								31.663	1.7201				8.994	1.0836											18.301	0.795294			18.827	0.818152				12.934	0.709378				15.235	0.835579
			24.262	0.824159			7.167	0.243457								36.329	1.97358				5.855	0.705413											18.376	0.798554			14.098	0.612647				20.139	1.10454				11.145	0.611259
			36.822	1.25081			19.31	0.655944								36.89	2.00405				3.837	0.462284											21.506	0.934572			9.832	0.427263				25.155	1.37965				6.907	0.378821
			26.156	0.888496			38.432	1.3055								40.696	2.21082				3.544	0.426983											17.719	0.770003			14.795	0.642936				24.587	1.3485				13.055	0.716015
			17.287	0.587224			33.031	1.12203								22.372	1.21536				3.239	0.390236											20.316	0.882859			9.962	0.432912				11.935	0.654587				19.363	1.06198
			36.2	1.22968			34.833	1.18325								11.046	0.600076				6.285	0.75722											19.169	0.833014			13.754	0.597698				12.7	0.696544				20.513	1.12506
			34.477	1.17115			28.364	0.9635								22.573	1.22628				6.772	0.815894											16.556	0.719463			7.516	0.326618				15.401	0.844683				11.174	0.612849
			34.488	1.17153			33.601	1.1414								28.887	1.56929				3.357	0.404453											15.037	0.653453			7.343	0.3191				18.956	1.03966				5.572	0.305602
			30.987	1.0526			32.232	1.09489								36.01	1.95625				4.127	0.497223											18.885	0.820673			14.195	0.616863				13.069	0.716782				9.402	0.515662
			36.452	1.23824			30.265	1.02808								31.687	1.7214				3.507	0.422525											18.783	0.81624			10.811	0.469806				15.558	0.853294				8.36	0.458513
			31.337	1.06449			28.766	0.977156								42.721	2.32082				2.971	0.357948											23.473	1.02005			12.769	0.554894				15.259	0.836895				10.595	0.581093
			36.472	1.23892			27.409	0.93106								33.066	1.79632				7.03	0.846978											28.569	1.2415			15.364	0.667663				12.346	0.677129				4.143	0.227227
			35.681	1.21205			22.382	0.760297								34.779	1.88937				3.324	0.400477											20.111	0.87395			17.401	0.756184				13.142	0.720786				12.757	0.699671
			37.888	1.28702			27.27	0.926338								33.689	1.83016				7.789	0.938423											25.808	1.12152			15.373	0.668054				14.355	0.787314				8.536	0.468166
			33.398	1.1345			42.091	1.42979								41.955	2.27921				3.486	0.419995											26.809	1.16502			12.71	0.55233				16.693	0.915544				13.119	0.719525
			26.43	0.897804			90.294	3.06721								43.323	2.35353				3.615	0.435537											17.749	0.771306			14.395	0.625554				15.752	0.863934				16.384	0.898597
			40.271	1.36797			9.452	0.321076								57.001	3.09659				2.385	0.287346											15.448	0.671313			9.003	0.391237				18.018	0.988215				4.691	0.257283
			34.948	1.18715			63.694	2.16363								35.083	1.90589				9.397	1.13216											27.08	1.1768			11.826	0.513915				14.376	0.788466				8.883	0.487197
			28.921	0.982421			45.056	1.53051								44.401	2.41209				8.577	1.03336											18.952	0.823584			12.385	0.538207				13.019	0.71404				10.492	0.575444
			31.764	1.079			47.382	1.60952								37.829	2.05507				8.502	1.02433											13.651	0.593222			13.399	0.582271				13.242	0.726271				11.845	0.649651
			32.357	1.09914			60.284	2.04779								42.994	2.33566				3.694	0.445055											23.007	0.9998			6.025	0.261824				16.946	0.92942				11.856	0.650254
			23.435	0.796066			41.177	1.39875								43.818	2.38042				8.178	0.98529											13.87	0.602739			10.324	0.448643				14.173	0.777332				11.329	0.62135
			26.66	0.905617			56.345	1.91399								39.593	2.1509				3.239	0.390236											13.638	0.592657			14.137	0.614342				22.349	1.22575				9.098	0.498989
			33.485	1.13746			34.449	1.1702								50.968	2.76884				9.379	1.12999											15.522	0.674529			18.097	0.786429				9.315	0.510891				10.891	0.597328
			41.941	1.4247			58.886	2.00031								57.442	3.12054				6.813	0.820834											22.776	0.989761			8.777	0.381416				14.24	0.781007				15.864	0.870077
			28.677	0.974133			57.132	1.94072								40.289	2.18871				8.131	0.979627											20.819	0.904717			16.829	0.731327				14.35	0.78704				2.874	0.157627
			28.729	0.975899			39.253	1.33339								61.494	3.34067				5.318	0.640715											16.823	0.731066			14.571	0.633202				10.351	0.567711				3.196	0.175288
			38.321	1.30173			60.831	2.06638								53.919	2.92916				8.955	1.0789											21.268	0.924229			13.327	0.579143				14.734	0.808101				8.845	0.485113
			31.352	1.065			45.964	1.56136								54.5	2.96072				6.74	0.812039											25.856	1.12361			13.963	0.606781				14.076	0.772012				13.026	0.714424
			24.762	0.841143			52.651	1.78851								6.529	0.354689				3.014	0.363128											20.396	0.886335			14.289	0.620948				13.497	0.740257				11.833	0.648993
			35.897	1.21939			40.468	1.37466								57.496	3.12348				4.013	0.483488											27.195	1.18179			16.127	0.70082				10.802	0.592447				14.462	0.793183
			28.626	0.9724			38.766	1.31685								84.032	4.56505				6.962	0.838785											14.074	0.611604			10.449	0.454075				9.639	0.528661				2.41	0.132179
			34.126	1.15923			49.412	1.67848								56.26	3.05633				5.935	0.715052											15.252	0.662796			14.939	0.649194				8.809	0.483138				10.858	0.595518
			26.975	0.916317			50.977	1.73164								66.029	3.58703				6.721	0.80975											14.85	0.645327			16.072	0.69843				11.221	0.615427				20.397	1.11869
			33.176	1.12696			38.984	1.32425								69.224	3.7606				9.955	1.19938											17.638	0.766483			4.793	0.208286				13.146	0.721006				4.984	0.273353
			38.256	1.29952			14.017	0.476145								59.913	3.25478				3.63	0.437344											18.629	0.809548			11.808	0.513132				15.774	0.865141				13.482	0.739434
			34.688	1.17832			42.762	1.45259								60.638	3.29417				7.399	0.891435											15.147	0.658233			10.447	0.453988				15.62	0.856695				2.543	0.139473
			30.403	1.03276			54.035	1.83552								67.616	3.67325				3.194	0.384815											16.642	0.7232			12.572	0.546333				18.328	1.00522				11.097	0.608626
			36.644	1.24476			46.938	1.59444								67.097	3.64505				3.414	0.41132											15.664	0.6807			11.116	0.483061				14.354	0.78726				11.721	0.64285
			37.245	1.26518			33.231	1.12883								68.988	3.74778				5.735	0.690956											22.428	0.974639			17.169	0.746102				12.16	0.666927				7.159	0.392643
			35.895	1.21932			37.826	1.28492								72.916	3.96117				3.637	0.438188											15.569	0.676572			8.055	0.350041				13.03	0.714644				12.703	0.696709
			30.357	1.0312			27.356	0.929259								61.004	3.31405				9.533	1.14854											29.569	1.28496			13.164	0.572059				15.487	0.8494				8.561	0.469537
			32.992	1.12071			45.508	1.54587								57.988	3.15021				6.404	0.771557											12.318	0.535295			13.66	0.593614				14.214	0.779581				3.916	0.214777
			31.231	1.06089			44.787	1.52138								52.683	2.86201				3.509	0.422766											13.624	0.592049			5.745	0.249657				23.281	1.27687				2.426	0.133056
			33.556	1.13987			43.151	1.4658								60.635	3.29401				6.092	0.733967											15.869	0.689609			5	0.217282				9.381	0.51451				12.05	0.660894
			29.903	1.01578			51.422	1.74676								78.883	4.28533				6.277	0.756256											21.024	0.913626			12.09	0.525387				14.326	0.785724				13.026	0.714424
			24.971	0.848243			34.71	1.17907								62.223	3.38027				6.024	0.725775											14.363	0.624163			14.798	0.643067				11.131	0.610491				14.283	0.783366
			30.815	1.04676			31.671	1.07584								78.449	4.26175				3.864	0.465537											19.496	0.847225			16.863	0.732804				18.728	1.02716				12.155	0.666653
			28.44	0.966082			40.985	1.39222								72.823	3.95612				3.917	0.471922											16.991	0.738367			17.01	0.739192				18.425	1.01054				1.751	0.0960354
			33.2	1.12777			36.459	1.23848								56.492	3.06894				3.129	0.376984											14.911	0.647977			10.394	0.451685				12.443	0.682449				11.359	0.622996
			24.434	0.830002			35.674	1.21181								54.216	2.94529				6.498	0.782882											16.056	0.697735			13.521	0.587573				13.645	0.748374				4.109	0.225362
			32.442	1.10203			36.682	1.24606								75.42	4.0972				7.702	0.927941											19.429	0.844313			11.962	0.519825				11.927	0.654148				9.594	0.526193
			40.193	1.36532			43.012	1.46108								62.729	3.40776				8.106	0.976615											14.615	0.635114			16.403	0.712814				13.24	0.726161				13.172	0.722432
			29.261	0.99397			33.721	1.14547								83.513	4.53686				5.52	0.665052											12.886	0.559978			15.734	0.683742				13.331	0.731152				15.997	0.877372
			31.168	1.05875			64.951	2.20633								85.433	4.64116				8.308	1.00095											12.783	0.555502			12.932	0.561977				17.472	0.958269				11.921	0.653819
			24.552	0.83401			19.046	0.646976								55.974	3.0408				3.089	0.372164											14.235	0.618601			19.825	0.861522				15.881	0.871009				6.56	0.35979
			26.618	0.90419			32.65	1.10909								57.718	3.13554				2.368	0.285298											20.772	0.902675			9.347	0.406186				15.469	0.848413				6.169	0.338345
			28.396	0.964587			40.893	1.3891								53.787	2.92199				5.177	0.623728											17.927	0.779042			10.458	0.454466				18.301	1.00374				16	0.877536
			27.093	0.920325			45.994	1.56238								62.759	3.40939				4.982	0.600234											13.302	0.578056			13.877	0.603044				11.132	0.610546				12.67	0.694899
			25.392	0.862544			60.104	2.04168								51.764	2.81209				6.787	0.817701											19.256	0.836795			16.369	0.711337				15.68	0.859985				15.183	0.832727
			26.19	0.889651			28.906	0.981911								64.254	3.49061				3.057	0.368309											13.488	0.586139			16.46	0.715291				15.286	0.838376				10.1	0.553945
			28.459	0.966727			52.468	1.78229								60.869	3.30672				2.883	0.347345											13.964	0.606824			17.907	0.778173				16.656	0.913515				14.076	0.772012
			32.474	1.10311			38.37	1.3034								78.919	4.28729				3.035	0.365658											18.758	0.815154			5.208	0.226321				15.429	0.846219				12.044	0.660565
			31.702	1.07689			40.511	1.37612								46.607	2.53193				6.419	0.773364											17.394	0.755879			10.182	0.442472				16.281	0.892948				11.095	0.608516
			31.176	1.05902			38.285	1.30051								65.346	3.54993				7.309	0.880592											12.244	0.532079			13.939	0.605738				19.564	1.07301				9.925	0.544347
			30.716	1.0434			32.486	1.10352								66.12	3.59198				2.296	0.276623											19.786	0.859827			21.225	0.922361				15.726	0.862508				14.784	0.810843
			33.919	1.1522			51.181	1.73857								68.825	3.73893				9.018	1.08649											19.063	0.828408			7.965	0.34613				13.058	0.716179				12.998	0.712888
			26.704	0.907111			29.726	1.00977								70.94	3.85383				6.736	0.811557											24.65	1.0712			12.629	0.54881				15.315	0.839967				14.966	0.820825
			26.944	0.915264			24.712	0.839445								55.121	2.99446				5.504	0.663125											11.927	0.518304			10.422	0.452902				9.923	0.544237				11.912	0.653326
			24.498	0.832176			30.419	1.03331								70.377	3.82324				2.798	0.337104											25.281	1.09862			10.601	0.460681				16.773	0.919932				15.212	0.834317
			28.093	0.954295			45.949	1.56085								50.117	2.72261				5.782	0.696618											13.222	0.57458			13.681	0.594526				12.804	0.702248				9.171	0.502993
			32.731	1.11184			35.145	1.19384								61.618	3.34741				2.773	0.334092											16.792	0.729719			11.953	0.519434				11.989	0.657549				8.184	0.44886
			29.529	1.00307			36.326	1.23396								68.975	3.74708				3.023	0.364213											21.47	0.933007			17.386	0.755532				12.902	0.707623				8.689	0.476557
			30.601	1.03949			34.82	1.1828								20.974	1.13942				5.872	0.707462											13.621	0.591919			16.816	0.730762				11.833	0.648993				15.564	0.853623
			29.149	0.990166			41.071	1.39515								70.421	3.82563				3.685	0.443971											13.445	0.58427			12.243	0.532036				19.569	1.07328				15.867	0.870242
			37.859	1.28604			46.513	1.58001								78.744	4.27778				2.983	0.359393											21.94	0.953432			12.711	0.552373				14.919	0.818248				14.846	0.814244
			28.511	0.968494			41.685	1.416								58.966	3.20334				2.869	0.345659											18.439	0.801291			16.733	0.727155				10.022	0.549667				17.406	0.95465
			31.807	1.08046			42.273	1.43598								55.809	3.03183				3.816	0.459754											13.518	0.587443			15.255	0.662926				9.992	0.548021				8.603	0.47184
			27.71	0.941284			31.71	1.07716								98.932	5.3745				3.058	0.368429											15.165	0.659015			15.323	0.665881				13.162	0.721883				7.84	0.429993
			27.088	0.920156			40.517	1.37633								49.167	2.671				16.593	1.99913											16.1	0.699647			8.604	0.373898				11.458	0.628426				11.127	0.610272
			27.357	0.929293			30.575	1.03861								55.469	3.01336				3.324	0.400477											11.069	0.481018			13.579	0.590094				9.787	0.536778				6.8	0.372953
			24.683	0.83846			17.057	0.579411								80.071	4.34987				2.844	0.342647											19.183	0.833623			7.638	0.331919				15.62	0.856695				12.089	0.663033
			31.46	1.06867			40.727	1.38346								80.802	4.38958				10.517	1.26709											11.92	0.517999			15.277	0.663882				16.043	0.879895				10.659	0.584604
			27.118	0.921175			44.586	1.51455								49.887	2.71012				11.191	1.3483											20.328	0.88338			12.746	0.553894				11.857	0.650309				10.246	0.561952
			25.44	0.864174			36.339	1.2344								71.422	3.88001				13.084	1.57637											16.1	0.699647			15.253	0.662839				19.065	1.04564				9.436	0.517527
			29.726	1.00977			40.994	1.39253								82.49	4.48128				8.466	1.01999											15.394	0.668967			6.997	0.304064				9.878	0.541769				18.455	1.01218
			26.471	0.899197			34.551	1.17367								83.109	4.51491				7.046	0.848906											10.463	0.454684			14.403	0.625902				19.461	1.06736				7.613	0.417543
			29.174	0.991015			27.79	0.944002								83.032	4.51073				5.875	0.707823											18.562	0.806636			14.974	0.650715				17.574	0.963864				10.368	0.568643
			26.938	0.91506			31.824	1.08103								58.885	3.19894				10.262	1.23637											15.535	0.675094			15.13	0.657494				19.255	1.05606				8.545	0.468659
			26.326	0.894271			31.187	1.0594								46.907	2.54823				6.81	0.820472											18.884	0.820629			8.79	0.381981				12.155	0.666653				6.678	0.366262
			24.687	0.838596			29.105	0.988671								56.403	3.0641				8.576	1.03324											20.33	0.883467			4.084	0.177476				13.613	0.746619				9.107	0.499483
			31.122	1.05719			33.928	1.1525								65.588	3.56308				11.818	1.42384											21.445	0.931921			9.374	0.40736				13.283	0.72852				8.182	0.44875
			27.121	0.921277			32.186	1.09333								57.188	3.10675				8.556	1.03083											23.207	1.00849			16.894	0.734151				16.918	0.927885				10.503	0.576048
			30.706	1.04306			27.861	0.946414								84.255	4.57716				10.548	1.27083											14.925	0.648586			14.377	0.624772				13.063	0.716453				10.552	0.578735
			30.419	1.03331			25.396	0.86268								63.097	3.42775				8.378	1.00939											15.919	0.691781			21.139	0.918623				34.342	1.88352				12.691	0.696051
			38.273	1.3001			25.085	0.852115								78.874	4.28484				2.735	0.329514											23.003	0.999626			11.152	0.484625				37.773	2.0717				8.051	0.441565
			30.484	1.03551			30.729	1.04384								90.463	4.91442				10.861	1.30854											21.325	0.926706			14.501	0.63016				12.688	0.695886				9.065	0.497179
			25.638	0.8709			23.66	0.803709								76.241	4.1418				6.541	0.788063											14.044	0.610301			6.508	0.282814				16.453	0.902381				11.759	0.644934
			30.023	1.01985			31.885	1.08311								74.03	4.02169				9.917	1.19481											11.756	0.510873			16.03	0.696605				32.828	1.80048				11.156	0.611862
			31.421	1.06734			31.73	1.07784								59.53	3.23398				12.422	1.49661											17.947	0.779911			17.005	0.738975				15.798	0.866457				9.304	0.510287
			29.635	1.00667			27.68	0.940265								62.809	3.41211				7.539	0.908303											18.38	0.798727			24.597	1.0689				17.969	0.985528				16.241	0.890754
			34.573	1.17441			13.061	0.443671								71.407	3.8792				9.327	1.12372											18.423	0.800596			12.573	0.546376				34.662	1.90107				10.004	0.548679
			28.649	0.973181			19.286	0.655128								70.315	3.81987				10.774	1.29806											21.241	0.923056			15.665	0.680743				17	0.932382				8.635	0.473595
			26.738	0.908266			29.51	1.00243								87.46	4.75128				7.051	0.849508											16.075	0.698561			16.353	0.710641				10.955	0.600838				15.284	0.838266
			29.936	1.0169			24.9	0.845831								59.348	3.22409				6.517	0.785172											16.782	0.729284			27.86	1.21069				37.19	2.03972				5.994	0.328747
			27.228	0.924911			16.843	0.572142								49.022	2.66313				9.939	1.19746											12.484	0.542509			2.896	0.12585				18.111	0.993316				11.285	0.618937
			30.117	1.02305			57.304	1.94657								71.914	3.90674				7.199	0.867339											12.743	0.553764			16.913	0.734977				17.196	0.943132				13.172	0.722432
			29.473	1.00117			65.505	2.22515								18.705	1.01615				6.964	0.839026											13.678	0.594396			11.803	0.512915				27.22	1.49291				7.621	0.417981
			41.785	1.4194			68.754	2.33551								75.135	4.08172				4.244	0.511319											13.368	0.580924			21.029	0.913843				32.769	1.79725				9.435	0.517472
			30.851	1.04798			51.258	1.74119								77.715	4.22188				9.458	1.1395											13.592	0.590658			11.31	0.491491				7.077	0.388145				14.839	0.81386
			29.732	1.00997			71.688	2.43518								44.137	2.39775				8.399	1.01192											12.812	0.556763			22.709	0.98685				26.281	1.44141				11.441	0.627493
			28.841	0.979703			60.751	2.06366								73.677	4.00251				8.5	1.02408											13.361	0.58062			22.616	0.982808				13.679	0.750239				10.628	0.582903
			33.022	1.12173			55.945	1.9004								55.481	3.01401				7.167	0.863484											12.12	0.526691			16.106	0.699908				22.587	1.23881				9.554	0.523999
			38.9	1.3214			64.099	2.17739								50.748	2.75689				9.216	1.11035											13.651	0.593222			17.956	0.780302				17.532	0.96156				13.568	0.744151
			30.422	1.03341			76.97	2.6146								65.74	3.57133				7.271	0.876014											12.609	0.547941			18.297	0.795121				14.783	0.810789				12.279	0.673454
			32.359	1.09921			18.987	0.644972								50.433	2.73978				11.816	1.4236											14.834	0.644631			12.837	0.557849				15.109	0.828668				13.933	0.764169
			30.363	1.0314			32.203	1.09391								103.344	5.61418				10.54	1.26986											15.874	0.689826			26.288	1.14238				25.353	1.39051				11.421	0.626396
			29.573	1.00457			37.154	1.26209								56.379	3.0628				7.704	0.928182											13.573	0.589833			12.328	0.53573				17.272	0.9473				6.842	0.375256
			27.164	0.922737			50.476	1.71463								74.805	4.06379				8.877	1.06951											13.365	0.580794			16.819	0.730892				19.818	1.08694				11.968	0.656397
			29.524	1.0029			41.176	1.39871								76.504	4.15609				9.879	1.19023											16.174	0.702863			9.908	0.430565				17.305	0.94911				6.642	0.364287
			27.592	0.937276			47.607	1.61717								54.898	2.98234				11.345	1.36685											13.037	0.56654			13.731	0.596699				15.101	0.82823				8.165	0.447818
			30.753	1.04465			35.384	1.20196								62.938	3.41912				9.633	1.16059											14.027	0.609562			3.988	0.173304				17.404	0.95454				6.747	0.370046
			27.515	0.93466			24.348	0.82708								77.389	4.20417				5.496	0.662161											13.059	0.567496			12.604	0.547724				16.926	0.928324				14.543	0.797626
			38.219	1.29827			19.137	0.650067								46.229	2.5114				5.566	0.670595											18.386	0.798988			1.94	0.0843053				15.48	0.849016				8.033	0.440578
			33.477	1.13718			31.089	1.05607								60.108	3.26538				8.141	0.980832											14.009	0.60878			9.169	0.398451				21.87	1.19948				22.947	1.25855
			30.337	1.03052			15.878	0.539362								67.216	3.65152				10.373	1.24974											11.819	0.51361			16.037	0.696909				14.406	0.790112				9.15	0.501841
			32.358	1.09917			61.253	2.08071								17.481	0.949658				9.688	1.16722											13.412	0.582836			10.381	0.45112				17.264	0.946862				9.176	0.503267
			33.925	1.1524			50.159	1.70386								74.808	4.06396				3.091	0.372405											12.904	0.560761			13.869	0.602696				18.32	1.00478				10.073	0.552464
			28.174	0.957046			42.172	1.43255								63.428	3.44574				3.191	0.384453											15.328	0.666099			9.934	0.431695				14.312	0.784956				15.552	0.852965
			30.818	1.04686			79.099	2.68692								70.484	3.82905				5.854	0.705293											16.155	0.702037			15.263	0.663274				23.939	1.31296				14.115	0.774151
			41.6	1.41312			44.798	1.52175								56.842	3.08795				7.861	0.947097											11.033	0.479454			13.931	0.60539				16.814	0.922181				10.382	0.569411
			32.163	1.09255			72.397	2.45926								88.796	4.82386				2.636	0.317587											10.288	0.447079			23.27	1.01123				28.311	1.55275				20.505	1.12462
			31.228	1.06079			27.238	0.925251								63.575	3.45372				8.99	1.08312											16.249	0.706122			16.156	0.702081				20.934	1.14815				9.931	0.544676
			27.026	0.91805			59.936	2.03597								82.593	4.48688				13.085	1.57649											12.789	0.555763			10.347	0.449643				15.985	0.876713				9.513	0.52175
			27.776	0.943526			69.564	2.36303								72.958	3.96345				9.6	1.15661											14.386	0.625163			11.719	0.509265				12.819	0.703071				9.546	0.52356
			29.215	0.992408			59.535	2.02235								69.368	3.76843				7.478	0.900953											14.832	0.644544			13.339	0.579664				8.816	0.483522				8.528	0.467727
			30.596	1.03932			61.396	2.08557								63.637	3.45709				7.456	0.898303											12.907	0.560891			13.12	0.570147				10.485	0.57506				8.01	0.439317
			29.797	1.01218			56.696	1.92591								79.641	4.32651				4.772	0.574933											13.576	0.589963			18.326	0.796381				14.868	0.81545				4.515	0.24763
			35.529	1.20689			13.06	0.443637								65.396	3.55265				2.891	0.348309											17.683	0.768438			4.847	0.210633				15.832	0.868322				9.185	0.503761
			16.901	0.574112			49.848	1.69329								74.787	4.06281				6.53	0.786738											11.765	0.511264			3.569	0.155096				17.718	0.971762				10.798	0.592227
			30.649	1.04112			21.538	0.731627								63.983	3.47589				5.872	0.707462											17.163	0.745841			15.941	0.692737				10.852	0.595189				10.709	0.587346
			34.452	1.1703			49.948	1.69669								77.205	4.19417				3.154	0.379996											16.669	0.724374			15.725	0.683351				8.971	0.492024				13.933	0.764169
			31.071	1.05545			66.805	2.26931								50.334	2.7344				11.466	1.38143											15.146	0.65819			11.957	0.519607				19.239	1.05518				9.842	0.539794
			29.755	1.01075			23.02	0.781969								51.977	2.82366				6.655	0.801798											18.544	0.805854			10.898	0.473587				17.789	0.975656				10.526	0.577309
			38.598	1.31114			40.217	1.36614								72.243	3.92461				8.114	0.977579											15.032	0.653236			16.109	0.700038				18.633	1.02195				7.736	0.424289
			29.488	1.00168			44.164	1.50021								64.615	3.51022				3.431	0.413369											17.46	0.758748			12.859	0.558805				11.909	0.653161				14.478	0.794061
			34.19	1.1614			21.112	0.717156								60.186	3.26961				3.513	0.423248											32.692	1.42067			17.098	0.743016				12.062	0.661553				10.267	0.563104
			26.146	0.888157			21.327	0.724459								79.327	4.30945				17.723	2.13528											29.013	1.2608			13.038	0.566584				16.677	0.914667				6.257	0.343171
			30.365	1.03147			89.126	3.02753								61.719	3.35289				8.405	1.01264											32.826	1.4265			13.385	0.581663				13.54	0.742615				11.536	0.632704
			23.46	0.796916			67.46	2.29156								61.545	3.34344				3.328	0.400959											31.32	1.36105			13.785	0.599046				13.766	0.75501				21.625	1.18604
			29.88	1.015			79.766	2.70958								69.711	3.78706				7.235	0.871677											28.662	1.24555			13.43	0.583619				33.917	1.86021				22.876	1.25466
			27.379	0.930041			54.764	1.86029								62.475	3.39396				64.948	7.82497											21.149	0.919058			13.677	0.594352				35.075	1.92372				7.4	0.40586
			16.786	0.570206			77.48	2.63193								61.772	3.35577				8.235	0.992157											32.397	1.40785			14.257	0.619557				38.17	2.09347				21.715	1.19098
			34.491	1.17163			76.091	2.58474								69.094	3.75354				10.323	1.24372											17.636	0.766396			14.319	0.622251				12.529	0.687166				21.515	1.18001
			33.987	1.15451			60.352	2.0501								66.446	3.60969				2.931	0.353128											22.424	0.974465			16.659	0.723939				16.744	0.918342				21.839	1.19778
			41.686	1.41604			44.12	1.49872								56.933	3.09289				7.334	0.883604											23.803	1.03439			10.202	0.443342				32.731	1.79516				2.24	0.122855
			35.998	1.22282			70.738	2.40291								55.445	3.01206				8.999	1.0842											25.613	1.11305			18.202	0.790992				15.436	0.846603				4.585	0.251469
			35.192	1.19544			103.395	3.51224								60.719	3.29857				8.073	0.972639											15.196	0.660362			13.177	0.572624				17.394	0.953991				4.205	0.230627
			25.219	0.856667			75.874	2.57737								77.155	4.19146				9.361	1.12782											25.085	1.0901			20.468	0.889464				34.253	1.87864				3.664	0.200956
			24.435	0.830036			75.659	2.57007								76.001	4.12877				13.286	1.6007											17.272	0.750578			13.848	0.601783				16.787	0.9207				4.411	0.241926
			36.056	1.22479			58.296	1.98026								67.704	3.67803				8.58	1.03372											32.355	1.40603			6.376	0.277078				36.511	2.00248				11.879	0.651516
			41.114	1.39661			85.591	2.90745								80.352	4.36513				6.661	0.802521											21.192	0.920927			12.727	0.553069				18.625	1.02151				10.676	0.585536
			29.122	0.989249			44.142	1.49946								56.439	3.06606				11.809	1.42275											28.823	1.25254			17.011	0.739236				27.298	1.49719				10.515	0.576706
			35.685	1.21219			41.433	1.40744								50.088	2.72104				7.311	0.880833											13.263	0.576361			17.772	0.772306				33.21	1.82144				10.524	0.577199
			23.349	0.793145			88.294	2.99927								51.895	2.8192				8.516	1.02601											31.454	1.36688			14.476	0.629074				25.945	1.42298				12.21	0.66967
			28.311	0.9617			70.977	2.41103								48.199	2.61842				8.54	1.0289											13.253	0.575927			10.927	0.474847				6.471	0.354909				14.417	0.790715
			31.225	1.06069			58.107	1.97384								84.79	4.60623				67.392	8.11942											21.786	0.94674			11.481	0.498922				13.821	0.758027				17.359	0.952072
			27.88	0.947059			66.357	2.25409								65.495	3.55803				11.618	1.39974											31.669	1.37622			9.021	0.39202				23.048	1.26409				8.255	0.452754
			30.242	1.02729			64.355	2.18608								51.514	2.79851				8.154	0.982398											20.079	0.87256			16.912	0.734934				16.969	0.930682				14.476	0.793951
			29.676	1.00807			66.248	2.25039								45.389	2.46576				10.742	1.2942											25.752	1.11909			14.264	0.619861				15.576	0.854281				10.492	0.575444
			39.15	1.32989			21.636	0.734956								60.84	3.30514				10.125	1.21987											31.184	1.35514			17.775	0.772436				14.218	0.779801				11.125	0.610162
			39.37	1.33736			64.844	2.20269								64.824	3.52157				8.409	1.01312											18.605	0.808505			18.519	0.804768				25.65	1.4068				8.945	0.490598
			38.512	1.30822			64.229	2.1818								57.288	3.11218				8.277	0.997217											28.568	1.24146			6.882	0.299066				18.38	1.00807				10.232	0.561184
			23.971	0.814274			72.377	2.45858								55.157	2.99641				8.55	1.03011											13.228	0.57484			14.727	0.639981				20.145	1.10487				11.287	0.619047
			28.673	0.973997			63.701	2.16387								56.39	3.06339				2.587	0.311683											34.03	1.47882			15.906	0.691216				16.677	0.914667				14.857	0.814847
			36.902	1.25353			60.675	2.06108								61.466	3.33915				2.681	0.323008											15.286	0.664274			13.12	0.570147				15.273	0.837663				10.902	0.597931
			28.842	0.979737			69.818	2.37166								52.516	2.85294				7.407	0.892399											35.772	1.55452			8.133	0.35343				18.532	1.01641				13.812	0.757533
			26.857	0.912309			73.899	2.51028								51.269	2.7852				3.366	0.405537											17.93	0.779172			7.648	0.332354				16.789	0.92081				13.952	0.765212
			44.206	1.50164			44.234	1.50259								52.713	2.86364				2.537	0.305659											22.622	0.983069			16.398	0.712597				16.664	0.913954				12.642	0.693363
			29.148	0.990132			58.552	1.98896								60.197	3.27021				3.043	0.366622											14.69	0.638374			12.379	0.537946				22.487	1.23332				14.515	0.79609
			31.978	1.08626			58.705	1.99416								44.803	2.43393				4.126	0.497103											29.908	1.29969			13.809	0.600089				14.362	0.787698				11.962	0.656068
			35.701	1.21273			60.775	2.06447								52.218	2.83675				3.386	0.407947											31.626	1.37435			9.704	0.4217				18.249	1.00088				12.287	0.673893
			36.019	1.22353			57.236	1.94426								39.635	2.15318				5.094	0.613728											29.731	1.292			17.35	0.753967				14.658	0.803933				18.351	1.00648
			36.708	1.24694			52.027	1.76731								45.785	2.48728				3.428	0.413007											14.565	0.632941			15.322	0.665838				23.358	1.28109				12.288	0.673948
			31.101	1.05647			73.745	2.50505								67.812	3.6839				2.603	0.313611											20.899	0.908194			4.92	0.213805				18.351	1.00648				10.952	0.600673
			32.767	1.11307			61.166	2.07776								51.536	2.7997				3.382	0.407465											18.279	0.794338			10.023	0.435563				29.538	1.62004				11.362	0.62316
			28.368	0.963636			54.998	1.86823								41.852	2.27362				2.848	0.343129											16.306	0.708599			16.132	0.701038				21.188	1.16208				12.135	0.665556
			29.202	0.991966			70.775	2.40416								41.849	2.27345				3.961	0.477223											14.904	0.647673			16.582	0.720593				18.403	1.00933				15.504	0.850333
			39.432	1.33947			56.916	1.93339								30.079	1.63405				2.443	0.294334											12.519	0.54403			7.534	0.3274				13.732	0.753145				12.347	0.677184
			40.425	1.3732			51.945	1.76453								39.687	2.156				3.906	0.470597											17.973	0.781041			8.065	0.350475				14.969	0.82099				9.681	0.530964
			30.317	1.02984			60.016	2.03869								43.1	2.34141				3.422	0.412284											28.125	1.22221			13.773	0.598524				26.294	1.44212				12.935	0.709433
			30.049	1.02074			46.756	1.58826								46.75	2.5397				2.362	0.284575											33.908	1.47352			15.838	0.688261				23.936	1.31279				16.662	0.913844
			36.504	1.24001			73.252	2.48831								66.279	3.60062				3.3	0.397586											21.031	0.91393			13.05	0.567105				17.133	0.939677				11.695	0.641424
			28.865	0.980519			62.158	2.11145								39.487	2.14514				3.229	0.389032											14.913	0.648064			18.501	0.803986				15.555	0.85313				15.238	0.835743
			33.636	1.14259			68.644	2.33178								46.487	2.52541				2.398	0.288912											35.78	1.55487			7.969	0.346304				24.194	1.32694				12.314	0.675374
			29.857	1.01422			57.345	1.94796								44.802	2.43388				2.695	0.324695											19.026	0.8268			16.35	0.710511				25.002	1.37126				14.221	0.779965
			30.426	1.03354			57.732	1.96111								43.25	2.34956				4.297	0.517705											17.451	0.758356			12.993	0.564628				18.377	1.00791				13.07	0.716837
			37.299	1.26701			55.11	1.87204								33.724	1.83206				2.846	0.342888											15.157	0.658668			8.355	0.363078				9.688	0.531348				8.793	0.482261
			44.168	1.50035			51.408	1.74628								36.266	1.97016				3.56	0.428911											19	0.82567			9.987	0.433998				16.663	0.913899				9.65	0.529264
			30.796	1.04611			74.552	2.53247								46.341	2.51748				2.692	0.324334											19.752	0.858349			8.5	0.369379				22.562	1.23744				10.747	0.58943
			28.885	0.981198			54.662	1.85682								47.811	2.59734				3.591	0.432646											32.547	1.41437			7.265	0.31571				10.936	0.599796				12.609	0.691553
			33.013	1.12142			62.746	2.13143								61.347	3.33268				3.145	0.378911											26.285	1.14225			7.097	0.30841				16.424	0.900791				12.212	0.669779
			36.03	1.22391			58.256	1.97891								40.56	2.20343				3.154	0.379996											30.72	1.33498			10.709	0.465374				25.668	1.40779				12.293	0.674222
			30.045	1.0206			41.826	1.42079								27.818	1.51122				2.882	0.347225											27.538	1.1967			18.069	0.785212				21.412	1.17436				9.262	0.507984
			44.891	1.52491			51.5	1.74941								43.739	2.37613				2.026	0.244094											26.614	1.15655			17.588	0.76431				19.575	1.07361				7.545	0.413813
			40.073	1.36124			51.463	1.74815								54.473	2.95925				2.375	0.286141											11.145	0.484321			1.173	0.0509743				18.996	1.04185				8.01	0.439317
			31.863	1.08236			60.086	2.04107								40.653	2.20848				2.6	0.313249											22.568	0.980723			16.487	0.716465				17.742	0.973078				7.882	0.432296
			35.932	1.22058			47.071	1.59896								44.115	2.39655				2.813	0.338912											15.255	0.662926			16.689	0.725243				21.725	1.19153				14.818	0.812708
			32.983	1.1204			53.546	1.81891								56.447	3.06649				2.594	0.312526											30.034	1.30517			8.128	0.353213				21.648	1.18731				7.988	0.43811
			25.639	0.870934			40.337	1.37021								47.606	2.5862				2.488	0.299756											26.318	1.14368			12.271	0.533253				12.646	0.693583				10.686	0.586084
			39.662	1.34728			50.196	1.70511								43.283	2.35136				2.098	0.252768											21.248	0.92336			11.899	0.517087				18.647	1.02271				11.434	0.627109
			29.151	0.990234			41.212	1.39994								45.602	2.47734				2.423	0.291924											17.081	0.742278			16.411	0.713162				18.847	1.03368				6.992	0.383483
			30.986	1.05257			50.441	1.71344								42.027	2.28312				2.331	0.28084											34.594	1.50333			16.143	0.701516				21.112	1.15791				7.673	0.420833
			29.187	0.991457			52.213	1.77363								56.24	3.05525				2.054	0.247467											15.104	0.656364			14.736	0.640373				28.772	1.57803				10.073	0.552464
			34.973	1.188			40.715	1.38305								46.495	2.52585				2.679	0.322767											28.453	1.23646			13.554	0.589007				21.608	1.18511				10.407	0.570782
			41.927	1.42422			56.084	1.90512								49.553	2.69197				2.285	0.275298											22.282	0.968294			16.392	0.712336				13.493	0.740037				10.864	0.595847
			42.814	1.45435			59.442	2.01919								47.444	2.5774				2.048	0.246744											10.616	0.461332			11.695	0.508222				20.436	1.12083				9.611	0.527125
			24.214	0.822528			48.527	1.64842								47.929	2.60375				2.524	0.304093											21.924	0.952737			5.154	0.223974				30.048	1.64801				7.634	0.418694
			22.929	0.778878			59.508	2.02143								43.767	2.37765				2.384	0.287226											14.57	0.633159			16.308	0.708686				24.181	1.32623				10.039	0.550599
			25.321	0.860132			44.077	1.49726								48.497	2.63461				2.644	0.31855											17.475	0.759399			15.82	0.687479				26.358	1.44563				10.839	0.594476
			23.252	0.78985			63.199	2.14681								40.613	2.20631				2.172	0.261684											14.103	0.612865			11.7	0.508439				25.293	1.38722				9.352	0.51292
			33.858	1.15013			42.729	1.45147								43.239	2.34896				2.125	0.256021											29.076	1.26354			11.679	0.507527				29.105	1.59629				8.006	0.439097
			29.854	1.01411			47.342	1.60817								50.846	2.76222				2.182	0.262888											20.569	0.893853			18.469	0.802595				28.84	1.58176				10.222	0.560636
			40.645	1.38067			52.993	1.80013								51.88	2.81839				2.343	0.282286											24.876	1.08102			3.824	0.166177				14.119	0.774371				10.268	0.563159
			28.839	0.979636			47.796	1.62359								50.466	2.74157				2.407	0.289997											22.383	0.972683			6.48	0.281597				11.347	0.622338				12.373	0.67861
			32.824	1.115			62.343	2.11774								50.115	2.7225				2.175	0.262045											26.575	1.15485			9.668	0.420136				11.491	0.630235				8.166	0.447873
			41.331	1.40398			41.266	1.40177								48.773	2.6496				2.29	0.2759											27.263	1.18475			15.75	0.684437				27.577	1.51249				11.852	0.650035
			28.715	0.975423			55.433	1.88301								52.783	2.86744				2.763	0.332888											26.088	1.13369			13.965	0.606868				26.591	1.45841				8.295	0.454948
			31.237	1.06109			52.501	1.78341								50.73	2.75591				2.616	0.315177											36.347	1.57951			11.24	0.488449				13.092	0.718044				12.569	0.689359
			32.806	1.11439			45.603	1.54909								45.648	2.47983				2.652	0.319514											13.777	0.598698			14.184	0.616385				13.113	0.719196				10.899	0.597767
			36.396	1.23634			57.711	1.96039								53.302	2.89564				3.213	0.387104											32.711	1.4215			12.579	0.546637				26.937	1.47739				14.001	0.767899
			34.427	1.16945			54.68	1.85743								44.84	2.43594				3.03	0.365056											14.875	0.646413			13.922	0.604999				27.388	1.50212				9.205	0.504858
			30.854	1.04808			53.346	1.81212								49.889	2.71023				7.351	0.885652											29.352	1.27553			14.228	0.618297				23.729	1.30144				11.288	0.619102
			29.851	1.01401			55.442	1.88332								42.821	2.32626				2.86	0.344574											32.137	1.39656			8.897	0.386631				12.211	0.669725				8.578	0.470469
			34.098	1.15828			43.001	1.46071								41.213	2.2389				2.896	0.348912											25.501	1.10818			5.804	0.252221				18.786	1.03034				9.749	0.534694
			38.07	1.2932			47.133	1.60107								49.103	2.66753				3.523	0.424453											22.88	0.994281			13.794	0.599437				12.124	0.664953				5.93	0.325237
			24.266	0.824295			35.32	1.19979								54.123	2.94024				3.236	0.389875											12.29	0.534078			14.256	0.619513				10.764	0.590362				10.617	0.5823
			29.736	1.01011			45.307	1.53904								49.83	2.70702				3.389	0.408308											10.166	0.441777			18.836	0.818543				29.277	1.60573				7.825	0.42917
			29.419	0.999338			52.411	1.78036								56.248	3.05568				2.825	0.340357											18.645	0.810243			14.236	0.618644				9.397	0.515388				11.06	0.606597
			33.364	1.13335			30.766	1.04509								46.329	2.51683				2.525	0.304213											18.121	0.787472			12.187	0.529602				13.966	0.765979				9.596	0.526302
			36.35	1.23478			70.122	2.38198								32.336	1.75666				2.421	0.291683											16.275	0.707252			12.409	0.53925				11.544	0.633142				11.37	0.623599
			40.532	1.37684			52.69	1.78983								48.911	2.6571				3.102	0.373731											23.529	1.02248			2.006	0.0871734				16.088	0.882363				13.866	0.760495
			36.351	1.23481			37.08	1.25958								45.092	2.44963				2.785	0.335538											30.586	1.32916			8.353	0.362991				15.571	0.854007				11.096	0.608571
			27.146	0.922126			50.1	1.70185								39.756	2.15975				2.993	0.360598											15.916	0.691651			7.166	0.311408				21.484	1.17831				9.32	0.511165
			31.013	1.05348			31.794	1.08001								43.46	2.36097				3.349	0.403489											16.985	0.738106			14.075	0.611648				14.791	0.811227				8.97	0.491969
			36.775	1.24921			68.432	2.32457								39.974	2.17159				3.706	0.446501											35.952	1.56234			6.605	0.287029				14.446	0.792305				11.592	0.635775
			29.11	0.988841			55.948	1.9005								55.168	2.99701				2.737	0.329755											11.59	0.503659			14.735	0.640329				20.477	1.12308				13.865	0.76044
			36.681	1.24602			55.611	1.88906								59.775	3.24729				3.713	0.447344											22.495	0.97755			14.696	0.638634				14.527	0.796748				13.14	0.720677
			38.319	1.30166			53.516	1.81789								58.48	3.17693				4.654	0.560716											30.145	1.30999			11.12	0.483234				16.579	0.909292				10.615	0.58219
			40.053	1.36057			54.85	1.86321								43.516	2.36401				3.789	0.456501											32.196	1.39912			15.637	0.679527				10.554	0.578845				10.172	0.557894
			29.37	0.997673			59.542	2.02259								47.906	2.6025				2.716	0.327225											23.032	1.00089			5.85	0.25422				12.559	0.688811				6.742	0.369772
			37.792	1.28376			33.72	1.14544								58.011	3.15146				2.721	0.327827											17.422	0.757096			18.789	0.816501				21.493	1.17881				5.904	0.323811
			29.333	0.996416			45.88	1.5585								38.993	2.1183				2.825	0.340357											35.038	1.52262			9.13	0.396756				21.833	1.19745				5.886	0.322824
			26.162	0.8887			66.485	2.25844								40.169	2.18219				2.755	0.331924											15.964	0.693737			4.244	0.184429				18.141	0.994961				8.358	0.458403
			46.422	1.57691			50.947	1.73062								40.618	2.20658				2.37	0.285539											24.938	1.08371			10.718	0.465765				13.788	0.756217				14.435	0.791702
			38.181	1.29698			67.285	2.28561								37.242	2.02318				3.068	0.369634											24.891	1.08167			7.073	0.307367				12.009	0.658646				11.454	0.628206
			31.378	1.06588			25.272	0.858468								51.015	2.7714				3.769	0.454091											32.025	1.39169			15.896	0.690782				10.961	0.601167				8.319	0.456264
			33.477	1.13718			64.289	2.18384								68.645	3.72915				2.806	0.338068											13.169	0.572276			7.082	0.307758				15.216	0.834537				9.147	0.501676
			39.5	1.34178			36.592	1.243								44.585	2.42209				2.583	0.311201											25.701	1.11687			19.593	0.85144				15.877	0.87079				9.627	0.528003
			35.919	1.22014			52.575	1.78593								35.103	1.90698				3.061	0.368791											34.059	1.48008			8.176	0.355299				19.326	1.05995				9.644	0.528935
			35.559	1.20791			55.088	1.87129								23.479	1.2755				2.295	0.276503											19.667	0.854656			8.465	0.367858									9.772	0.535955
			43.57	1.48003			58.519	1.98784								39.293	2.1346				2.887	0.347827											24.174	1.05051			16.741	0.727502									13.027	0.714479
			26.799	0.910339			65.221	2.2155								62.732	3.40792				3.173	0.382285											14.244	0.618992			14.654	0.636809									9.773	0.53601
			31.123	1.05722			45.303	1.5389								38.422	2.08728				2.675	0.322285											26.928	1.17019			9.303	0.404274									9.757	0.535133
			41.567	1.41199			55.356	1.88039								59.587	3.23707				3.377	0.406863											31.633	1.37465			16.786	0.729458									9.071	0.497508
			36.483	1.2393			74.801	2.54092								55.643	3.02281				3.55	0.427706											35	1.52097			15.946	0.692955									8.957	0.491256
			41.889	1.42293			49.271	1.67369								37.204	2.02111				2.649	0.319153											29.406	1.27788			20.163	0.87621									7.678	0.421108
			28.748	0.976544			50.08	1.70117								42.008	2.28209				2.115	0.254816											34.331	1.4919			14.116	0.61343									8.59	0.471127
			43.083	1.46349			60.831	2.06638								46.99	2.55274				2.773	0.334092											18.019	0.78304			17.285	0.751143									4.045	0.221852
			31.364	1.06541			44.267	1.50371								46.482	2.52514				2.935	0.35361											30.363	1.31946			15.138	0.657842									8.557	0.469317
			24.486	0.831768			49.501	1.68151								33.496	1.81968				2.469	0.297466											19.538	0.84905			17.629	0.766092									10.159	0.557181
			34.408	1.16881			44.428	1.50918								43.698	2.3739				2.904	0.349875											25.673	1.11565			6.703	0.291288									9.986	0.547692
			28.065	0.953343			43.211	1.46784								44.048	2.39291				2.694	0.324575											25.612	1.113			12.888	0.560065									5.206	0.285528
			40.128	1.36311			62.826	2.13414								61.048	3.31644				2.766	0.333249											25.606	1.11274			13.086	0.56867									3.546	0.194484
			52.571	1.78579			77.133	2.62014								61.147	3.32182				2.571	0.309755											22.799	0.990761			11.804	0.512959									13.198	0.723858
			39.027	1.32571			67.19	2.28239								40.509	2.20066				2.67	0.321683											17.553	0.762789			18.366	0.798119									9.718	0.532994
			41.728	1.41746			43.673	1.48353								46.189	2.50922				2.982	0.359273											25.658	1.115			14.988	0.651324									10.545	0.578351
			31.288	1.06283			51.496	1.74927								46.166	2.50797				2.241	0.269997											24.552	1.06694			4.044	0.175737									9.219	0.505625
			38.688	1.3142			61.23	2.07993								52.679	2.86179				2.413	0.290719											29.77	1.2937			8.454	0.36738									14.01	0.768393
			42.573	1.44617			40.26	1.3676								40.148	2.18105				2.38	0.286744											21.24	0.923013			15.191	0.660145									7.428	0.407396
			36.14	1.22764			33.098	1.12431													2.622	0.3159											22.033	0.957473			13.285	0.577317									5.662	0.310538
			28.816	0.978854			44.047	1.49624													2.76	0.332526											20.533	0.892289			16.014	0.69591									11.869	0.650967
			34.408	1.16881			40.22	1.36624													2.711	0.326623											23.727	1.03109			13.176	0.572581									4.386	0.240555
			39.101	1.32823			86	2.92134													2.645	0.318671											32.601	1.41672			13.97	0.607085									11.124	0.610107
			29.137	0.989758			46.766	1.5886													2.334	0.281202											25.432	1.10518			7.005	0.304412									8.092	0.443814
			36.7	1.24667			42.113	1.43054													2.433	0.293129											24.866	1.08059			14.082	0.611952									9.429	0.517143
			35.592	1.20903			52.141	1.77118													2.215	0.266864											27.9	1.21243			9.98	0.433694									7.576	0.415513
			48.889	1.66072			50.113	1.70229													2.385	0.287346											28.327	1.23099			4.826	0.20972									2.541	0.139364
			43.986	1.49417			42.486	1.44321													2.409	0.290238											25.907	1.12582			16.951	0.736628									12.205	0.669396
			31.353	1.06503			76.326	2.59273													2.681	0.323008											20.209	0.878209			13.885	0.603391									1.874	0.102781
			31.637	1.07468			50.604	1.71897													2.492	0.300237											25.293	1.09914			16.621	0.722288									3.369	0.184776
			39.824	1.35279			41.62	1.41379													2.565	0.309033											46.241	2.00946			17.042	0.740583									2.014	0.11046
			38.904	1.32153			52.564	1.78555													1.864	0.224576											35.565	1.54552			14.035	0.60991									8.195	0.449463
			34.57	1.17431			49.704	1.6884													2.914	0.35108											51.377	2.23266			16.261	0.706643									13.588	0.745248
			26.927	0.914687			67.562	2.29502													3.13	0.377104											35.678	1.55044			15.322	0.665838									7.458	0.409042
			35.943	1.22095			50.092	1.70158													2.101	0.25313											39.268	1.70644			13.23	0.574927									13.791	0.756381
			37.15	1.26195			47.421	1.61085													5.908	0.711799											52.625	2.28689			4.935	0.214457									10.07	0.552299
			45.245	1.53693			46.093	1.56574													2.612	0.314695											28.517	1.23924			4.726	0.205375									9.555	0.524054
			45.403	1.5423			40.834	1.3871													2.406	0.289876											27.198	1.18193			16.021	0.696214									13.651	0.748703
			46.382	1.57556			47.932	1.62821													2.512	0.302647											34.029	1.47878			13.055	0.567322									12.703	0.696709
			29.645	1.00701			55.005	1.86847													2.766	0.333249											41.203	1.79053			16.886	0.733804									13.681	0.750348
			33.164	1.12655			52.141	1.77118													2.408	0.290117											43.977	1.91108			14.939	0.649194									17.594	0.964961
			42.756	1.45238			66.641	2.26374													2.328	0.280479											28.328	1.23103			9.793	0.425568									18.026	0.988654
			45.767	1.55466			43.406	1.47446													2.329	0.280599											41.347	1.79679			12.653	0.549853									11.05	0.606048
			50.493	1.7152			48.496	1.64737													2.588	0.311804											32.059	1.39317			7.444	0.323489									20.658	1.13301
			46.889	1.59278			51.286	1.74214													2.952	0.355658											31.808	1.38226			22.604	0.982287									15.749	0.86377
			50.214	1.70573			64.754	2.19964													2.886	0.347707											28.349	1.23194			4.597	0.199769									17.172	0.941816
			35.805	1.21626			51.319	1.74326													2.616	0.315177											37.521	1.63053			10.969	0.476673									11.282	0.618773
			36.503	1.23997			50.35	1.71035													2.522	0.303852											44.115	1.91708			11.555	0.502138									19.761	1.08381
			33.341	1.13256			55.535	1.88648													2.652	0.319514											34.253	1.48851			13.949	0.606172									18.258	1.00138
			36.41	1.23682			53.721	1.82486													2.392	0.288189											28.556	1.24094			11.612	0.504615									5.866	0.321727
			40.21	1.3659			49.092	1.66761													2.674	0.322165											31.641	1.375			17.133	0.744537									5.45	0.298911
			29.675	1.00803			49.665	1.68708													2.412	0.290599											47.436	2.06139			5.53	0.240314									16.407	0.899858
			39.681	1.34793			37.619	1.27788													2.39	0.287948											31.548	1.37096			15.445	0.671183									19.313	1.05924
			43.017	1.46125			66.96	2.27457													2.271	0.273611											21.796	0.947174			17.204	0.747623									15.114	0.828943
			27.807	0.944579			57.226	1.94392													2.615	0.315057											40.218	1.74773			19.676	0.855047									11.927	0.654148
			31.373	1.06571			49.028	1.66544													2.405	0.289756											34.115	1.48251			16.852	0.732326									18.638	1.02222
			18.769	0.637566			40.255	1.36743													3.27	0.393971											34.287	1.48999			17.136	0.744668									14.322	0.785505
			40.897	1.38924			60.419	2.05238													2.796	0.336864											39.116	1.69984			22.567	0.980679									9.259	0.507819
			40.332	1.37004			41.368	1.40523													2.904	0.349875											38.695	1.68154			15.679	0.681352									13.315	0.730275
			30.725	1.0437			46.256	1.57128													2.333	0.281081											24.867	1.08063			12.392	0.538511									11.464	0.628755
			43.878	1.4905			48.392	1.64383													2.512	0.302647											23.209	1.00858			3.414	0.14836									9.447	0.51813
			23.017	0.781867			57.654	1.95846													2.585	0.311442											29.66	1.28891			6.47	0.281162									13.394	0.734607
			28.221	0.958643			45.561	1.54767													3.091	0.372405											35.709	1.55178			16.762	0.728415									10.525	0.577254
			30.818	1.04686			58.12	1.97429													2.644	0.31855											32.468	1.41094			15.853	0.688913									12.091	0.663143
			38.203	1.29772			73.148	2.48477													2.662	0.320719											35.721	1.5523			15.762	0.684959									14.646	0.803275
			45.042	1.53004			64.337	2.18547													3.653	0.440115											31.37	1.36323			15.308	0.66523									11.492	0.63029
			30.743	1.04431			54.138	1.83902													10.229	1.2324											32.852	1.42763			12.398	0.538772									14.435	0.791702
			31.179	1.05912			67.109	2.27963													2.604	0.313731											23.075	1.00275			16.39	0.712249									15.376	0.843312
			35.8	1.21609			64.984	2.20745													3.057	0.368309											35.798	1.55565			17.47	0.759182									8.839	0.484784
			19.647	0.667391			49.954	1.69689													3.173	0.382285											25.515	1.10879			14.362	0.62412									7.321	0.401528
			26.472	0.899231			38.34	1.30238													3.028	0.364815											28.273	1.22864			8.778	0.38146									8.253	0.452644
			42.902	1.45734			55.457	1.88383													2.91	0.350598											25.205	1.09532			11.393	0.495098									15.933	0.873861
			20.683	0.702583			54.792	1.86124													2.663	0.32084											26.657	1.15842			22.619	0.982939									15.946	0.874574
			42.963	1.45942			58.57	1.98957													2.739	0.329996											28.914	1.2565			13.837	0.601305									16.268	0.892235
			49.51	1.68181			62.723	2.13065													3.374	0.406501											23.554	1.02357			12.553	0.545507									13.791	0.756381
			39.23	1.33261			63.293	2.15001													2.782	0.335177											19.392	0.842705			11.675	0.507353									7.892	0.432845
			49.2	1.67128			72.966	2.47859													3.029	0.364935											26.443	1.14912			9.815	0.426524									7.767	0.425989
			44.159	1.50004			63.673	2.16292													3.55	0.427706											30.923	1.3438			10.194	0.442994									10.575	0.579997
			30.883	1.04907			56.141	1.90706													3.303	0.397947											33.769	1.46748			8.055	0.350041									10.577	0.580106
			28.798	0.978243			53.411	1.81432													3.558	0.42867											29.541	1.28374			5.529	0.24027									6.403	0.351179
			57.29	1.94609			61.538	2.09039													2.933	0.353369											40.726	1.7698			11.846	0.514784									9.729	0.533597
			43.785	1.48734			66.545	2.26048													3.823	0.460597											33.332	1.44849			17.787	0.772958									9.08	0.498002
			41.218	1.40014			76.011	2.58203													4.139	0.498669											32.136	1.39651			7.599	0.330225									8.943	0.490488
			31.875	1.08277			58.348	1.98203													2.73	0.328912											35.072	1.5241			6.184	0.268734									17.745	0.973242
			33.113	1.12482			49.301	1.67471													3.102	0.373731											32.363	1.40638			13.739	0.597047									9.46	0.518843
			30.645	1.04098			67.862	2.30521													8.62	1.03854											32.5	1.41233			4.953	0.215239									8.228	0.451273
			24.676	0.838222			77.872	2.64524													2.641	0.318189											37.939	1.64869			20.04	0.870865									6.957	0.381564
			35.426	1.20339			51.495	1.74924													3.636	0.438067											23.35	1.01471			16.443	0.714552									8.436	0.462681
			27.319	0.928002			48.487	1.64706													2.593	0.312406											32.499	1.41229			15.973	0.694128									7.729	0.423905
			43.051	1.4624			80.524	2.73533													3.306	0.398309											28.269	1.22847			16.945	0.736368									9.831	0.539191
			45.078	1.53126			48.05	1.63222													2.404	0.289635											31.506	1.36914			2.31	0.100384									9.723	0.533268
			40.396	1.37222			54.414	1.8484													3.001	0.361562											26.945	1.17093			6.188	0.268908									11.745	0.644166
			44.577	1.51424			81.096	2.75476													3.076	0.370598											31.96	1.38886			10.113	0.439474									10.631	0.583068
			42.55	1.44539			66.936	2.27376													3.11	0.374694											34.919	1.51745			16.902	0.734499									8.025	0.440139
			32.114	1.09088			64.409	2.18792													2.232	0.268913											29.604	1.28648			17.069	0.741756									8.588	0.471018
			46.527	1.58048			76.705	2.6056													3.27	0.393971											27.671	1.20248			23.648	1.02766									14.992	0.822251
			49.783	1.69108			73.944	2.51181													3.395	0.409031											28.156	1.22356			15.721	0.683177									8.926	0.489555
			29.1	0.988501			55.606	1.88889													3.166	0.381441											26.812	1.16515			14.948	0.649585									7.667	0.420504
			33.906	1.15176			73.908	2.51059													2.513	0.302768											29.759	1.29322			9.426	0.409619									14.375	0.788411
			45.32	1.53948			64.313	2.18466													3.441	0.414573											30.337	1.31833			15.621	0.678831									5.525	0.303024
			44.375	1.50738			63.789	2.16686													2.37	0.285539											27.928	1.21365			13.498	0.586574									12.666	0.69468
			26.411	0.897158			60.195	2.04477													2.541	0.306141											25.163	1.09349			15.48	0.672704									13.495	0.740147
			39.02	1.32548			67.661	2.29838													2.786	0.335659											18.586	0.807679			16.881	0.733586									10.306	0.565243
			27.337	0.928614			59.49	2.02082													2.584	0.311322											31.992	1.39026			5.372	0.233447									12.761	0.69989
			48.458	1.64608			67.787	2.30266													3.095	0.372887											25.937	1.12713			16.022	0.696257									11.994	0.657823
			23.978	0.814512			42.123	1.43088													2.418	0.291322											30.203	1.31251			5.527	0.240183									12.624	0.692376
			45.07	1.53099			66.412	2.25596													2.818	0.339514											21.132	0.918319			5.312	0.23084									10.541	0.578132
			23.285	0.790971			67.255	2.28459													3.917	0.471922											23.03	1.0008			11.05	0.480192									6.175	0.338674
			25.256	0.857924			59.916	2.03529													3.244	0.390839											29.74	1.29239			11.965	0.519955									7.492	0.410906
			41.914	1.42378			74.731	2.53855													2.489	0.299876											27.404	1.19088			10.67	0.463679									14.108	0.773768
			45.239	1.53673			64.773	2.20028													3.046	0.366984											31.886	1.38565			10.452	0.454206									21.991	1.20612
			39.827	1.35289			66.779	2.26842													2.515	0.303008											21.57	0.937353			22.15	0.962558									9.723	0.533268
			48.541	1.6489			65.729	2.23276													2.582	0.311081											30.614	1.33037			17.177	0.746449									14.889	0.816602
			26.148	0.888225			57.474	1.95234													2.872	0.34602											28.164	1.2239			12.695	0.551678									13.068	0.716728
			43.742	1.48588			45.726	1.55327													3.428	0.413007											29.409	1.27801			3.106	0.134975									19.453	1.06692
			41.564	1.41189			60.453	2.05354													3.175	0.382526											23.799	1.03422			11.526	0.500878									8.598	0.471566
			49.797	1.69156			65.111	2.21176													2.619	0.315538											32.175	1.39821			4.35	0.189035									9.376	0.514236
			25.027	0.850145			67.483	2.29234													3.595	0.433127											35.727	1.55256			14.471	0.628857									4.021	0.220536
			33.017	1.12156			59.994	2.03794													3.916	0.471802											32.792	1.42502			25.996	1.12969									10.581	0.580326
			48.334	1.64186			64.709	2.19811													2.758	0.332285											27.792	1.20774			5.503	0.23914									8.065	0.442333
			30.997	1.05294			73.343	2.4914													5.075	0.611439											20.14	0.875211			2.379	0.103383									10.587	0.580655
			47.468	1.61245			65.51	2.22532													3.105	0.374092											32.53	1.41363			14.261	0.619731									8.872	0.486594
			23.199	0.78805			62.314	2.11675													3.914	0.471561											29.181	1.2681			7.869	0.341958									12.78	0.700932
			26.995	0.916996			36.696	1.24653													3.497	0.42132											29.76	1.29326			14.725	0.639895									13.376	0.73362
			50.959	1.73103			64.244	2.18231													3.771	0.454332											31.556	1.37131			13.92	0.604912									9.259	0.507819
			41.738	1.4178			50.21	1.70559													3.389	0.408308											29.09	1.26414			12.739	0.55359									5.359	0.29392
			42.398	1.44022			68.332	2.32118													3.375	0.406622											23.991	1.04256			2.997	0.130239									21.139	1.15939
			32.876	1.11677			45.284	1.53826													2.976	0.35855											28.17	1.22416			5.31	0.230753									21.865	1.19921
			45.11	1.53235			55.892	1.8986													3.636	0.438067											24.451	1.06255			22.294	0.968815									20.651	1.13262
			45.464	1.54437			51.927	1.76391													3.396	0.409152											25.08	1.08988			13.676	0.594309									20.144	1.10482
			25.908	0.880072			52.669	1.78912													3.202	0.385779											27.861	1.21074			15.902	0.691043									21.361	1.17157
			25.691	0.872701			58.652	1.99236													3.296	0.397104											18.964	0.824106			5.951	0.258609									16.408	0.899913
			26.716	0.907519			48.981	1.66384													2.892	0.34843											28.903	1.25602			15.944	0.692868									16.68	0.914831
			24.237	0.82331			52.006	1.7666													4.215	0.507825											35.398	1.53827			8.492	0.369031									15.098	0.828065
			51.988	1.76599			56.545	1.92078													3.402	0.409875											22.486	0.977159			16.207	0.704297									16.483	0.904027
			24.986	0.848752			50.3	1.70865													4.4	0.530114											34.848	1.51437			4.26	0.185124									21.248	1.16537
			32.504	1.10413			54.779	1.86079													4.541	0.547102											22.45	0.975595			23.038	1.00115									9.119	0.500141
			23.337	0.792737			40.016	1.35931													2.662	0.320719											30.167	1.31095			7.986	0.347042									16.911	0.927501
			31.366	1.06548			41.595	1.41295													4.113	0.495536											33.561	1.45844			5.051	0.219498									16.606	0.910773
			22.824	0.775311			55.848	1.89711													3.651	0.439874											27.306	1.18662			5.737	0.249309									11.666	0.639834
			28.026	0.952019			47.481	1.61289													3.971	0.478428											22.813	0.991369			11.407	0.495706									18.426	1.01059
			30.418	1.03327			45.687	1.55195													3.663	0.44132											19.73	0.857393			12.923	0.561586									18.419	1.01021
			32.324	1.09802			40.733	1.38366													3.195	0.384935											32.006	1.39086			12.933	0.562021									13.509	0.740915
			37.382	1.26983			47.297	1.60664													3.598	0.433489											25.119	1.09158			3.148	0.136801									17.317	0.949768
			23.393	0.79464			54.571	1.85373													4.094	0.493247											27.376	1.18966			12.162	0.528516									15.39	0.84408
			43.495	1.47749			49.393	1.67784													3.706	0.446501											32.073	1.39377			2.458	0.106816									13.234	0.725832
			39.455	1.34025			57.394	1.94962													3.237	0.389995											24.122	1.04825			19.785	0.859784									16.071	0.88143
			31.022	1.05379			57.053	1.93804													3.563	0.429272											28.025	1.21786			12.499	0.543161									14.83	0.813366
			27.386	0.930278			58.43	1.98482													4.082	0.491801											30.939	1.3445			19.854	0.862782									5.848	0.320739
			24.115	0.819165			51.663	1.75495													2.866	0.345297											19.463	0.845791			12.751	0.554112									8.711	0.477764
			28.18	0.95725			58.359	1.9824													3.331	0.401321											28.033	1.21821			8.946	0.38876									19.908	1.09187
			26.748	0.908606			45.682	1.55178													4.229	0.509512											28.175	1.22438			7.384	0.320882									16.073	0.88154
			30.58	1.03878			49.693	1.68803													3.388	0.408188											21.95	0.953867			11.747	0.510482									20.71	1.13586
			28.932	0.982795			49.988	1.69805													3.599	0.433609											23.053	1.0018			9.814	0.42648									11.527	0.63221
			44.624	1.51584			25.018	0.84984													3.072	0.370116											32.622	1.41763			13.224	0.574667									16.34	0.896184
			45.918	1.55979			52.692	1.7899													3.724	0.448669											32.632	1.41807			2.776	0.120635									5.662	0.310538
			31.25	1.06154			42.785	1.45337													3.366	0.405537											26.778	1.16367			6.634	0.288289									18.065	0.990793
			46.825	1.5906			53.425	1.8148													2.881	0.347104											16.911	0.73489			14.529	0.631377									14.827	0.813202
			29.196	0.991762			39.579	1.34446													3.232	0.389393											17.831	0.77487			13.057	0.567409									17.215	0.944174
			25.925	0.880649			57.834	1.96457													2.954	0.355899											22.09	0.95995			8.272	0.359471									18.195	0.997923
			34.88	1.18484			53.883	1.83036													9.512	1.14601											24.334	1.05747			17.696	0.769003									14.032	0.769599
			46.037	1.56384			54.763	1.86025																									26.661	1.15859			11.068	0.480975									8.935	0.490049
			31.127	1.05736			51.54	1.75077																									16.922	0.735368			17.235	0.74897									10.592	0.580929
			55.116	1.87224			51.72	1.75688																									31.558	1.37139			6.815	0.296155									15.139	0.830314
			29.272	0.994344																													16.554	0.719376			16.042	0.697126									14.016	0.768722
			26.479	0.899468																													23.937	1.04021			4.703	0.204375									10.706	0.587181
			29.288	0.994888																													20.783	0.903153			7.063	0.306932									17.035	0.934302
			30.689	1.04248																													23.622	1.02653			16.566	0.719898									10.929	0.599412
			25.699	0.872972																													27.95	1.2146			14.198	0.616993									16.113	0.883734
			44.388	1.50782																													21.546	0.93631			12.6	0.54755									11.945	0.655136
			28.226	0.958812																													17.536	0.76205			13.204	0.573797									18.617	1.02107
			25.438	0.864107																													30.78	1.33759			6.398	0.278034									14.809	0.812215
			32.948	1.11921																													22.471	0.976507			6.336	0.275339									14.846	0.814244
			26.937	0.915026																													30.432	1.32246			11.073	0.481192									17.688	0.970116
			27.88	0.947059																													33.969	1.47617			12.624	0.548593									14.972	0.821154
			28.625	0.972366																													18.706	0.812894			13.688	0.59483									16.979	0.93123
			41.341	1.40432																													18.63	0.809591			9.234	0.401276									16.132	0.884776
			26.639	0.904903																													24.753	1.07567			11.15	0.484538									13.228	0.725503
			28.308	0.961598																													17.885	0.777217			8.686	0.377462									15.738	0.863166
			36.612	1.24368																													24.581	1.0682			12.748	0.553981									12.463	0.683546
			44.021	1.49535																													31.164	1.35427			14.367	0.624337									15.826	0.867993
			44.432	1.50932																													17.771	0.772262			15.873	0.689782									12.254	0.672083
			38.539	1.30914																													29.958	1.30186			7.314	0.31784									18.991	1.04158
			39.348	1.33662																													23.108	1.00419			9.89	0.429783									13.692	0.750952
			21.815	0.741036																													19.033	0.827104			11.645	0.506049									18.39	1.00862
			50.021	1.69917																													35.181	1.52884			18.774	0.815849									18.164	0.996223
			25.869	0.878747																													15.608	0.678266			15.817	0.687349									20.361	1.11672
			42.868	1.45619																													21.959	0.954258			10.853	0.471632									13.604	0.746125
			41.455	1.40819																													17.646	0.76683			12.734	0.553373									12.492	0.685136
			38.301	1.30105																													31.463	1.36727			15.234	0.662014									14.726	0.807662
			24.765	0.841245																													32.882	1.42893			9.537	0.414443									19.439	1.06615
			35.345	1.20064																													16.807	0.730371			10.708	0.46533									14.841	0.81397
			46.211	1.56975																													17.23	0.748753			10.246	0.445254									21.311	1.16882
			25.632	0.870697																													16.286	0.70773			10.596	0.460463									17.186	0.942584
			34.526	1.17282																													32.602	1.41676			9.438	0.410141									15.079	0.827023
			37.057	1.25879																													26.969	1.17197			12.964	0.563368									17.593	0.964906
			38.527	1.30873																													36.871	1.60228			10.217	0.443993									23.249	1.27511
			42.39	1.43995																													31.924	1.3873			14.987	0.65128									19.861	1.0893
			38.302	1.30109																													32.325	1.40473			16.506	0.71729									17.677	0.969513
			45.22	1.53608																													20.848	0.905978			1.881	0.0817414									15.744	0.863496
			25.543	0.867673																													28.662	1.24555			10.346	0.449599									16.828	0.922949
			36.139	1.22761																													32.174	1.39816			4.049	0.175955									23.485	1.28806
			32.506	1.1042																													16.464	0.715465			15.977	0.694302									11.253	0.617182
			38.398	1.30435																													20.864	0.906673			13.825	0.600784									18.894	1.03626
			46.082	1.56537																													23.084	1.00315			11.192	0.486363									18.156	0.995784
			29.764	1.01106																													24.614	1.06963			5.238	0.227624									15.455	0.847645
			32.839	1.11551																													14.48	0.629248			5.98	0.259869									17.967	0.985418
			44.823	1.5226																													23.861	1.03691			23.231	1.00953									14.03	0.76949
			40.447	1.37395																													16.46	0.715291			11.667	0.507005									20.872	1.14475
			44.459	1.51023																													27.143	1.17954			11.089	0.481887									17.233	0.945161
			30.246	1.02743																													31.743	1.37943			15.447	0.67127									15.296	0.838925
			38.729	1.31559																													26.701	1.16033			5.512	0.239531									20.275	1.112
			41.788	1.4195																													11.154	0.484712			15.048	0.653931									12.473	0.684094
			43.216	1.46801																													19.579	0.850832			12.938	0.562238									11.221	0.615427
			28.522	0.968867																													29.934	1.30082			12.174	0.529037									10.39	0.56985
			38.452	1.30618																													27.402	1.19079			8.123	0.352996									9.944	0.545389
			30.074	1.02159																													12.07	0.524518			12.04	0.523214									9.496	0.520818
			36.833	1.25118																													16.292	0.707991			15.303	0.665012									17.182	0.942364
			31.127	1.05736																													20.396	0.886335			12.46	0.541466									16.895	0.926623
			34.437	1.16979																													31.057	1.34962			22.745	0.988414									20.573	1.12835
			40.855	1.38781																													18.128	0.787776			13.063	0.56767									15.595	0.855324
			31.026	1.05393																													23.578	1.02461			8.342	0.362513									17.495	0.959531
			44.113	1.49848																													28.815	1.25219			12.847	0.558284									13.078	0.717276
			54.562	1.85342																													16.913	0.734977			18.677	0.811634									12.43	0.681736
			33.438	1.13586																													26.379	1.14633			11.263	0.489449									19.481	1.06846
			38.134	1.29538																													12.827	0.557414			16.505	0.717247									13.756	0.754462
			32.418	1.10121																													31.137	1.3531			2.908	0.126371									12.05	0.660894
			43.185	1.46696																													15.944	0.692868			22.096	0.960211									17.472	0.958269
			29.552	1.00386																													19.962	0.867475			12.144	0.527734									16.465	0.90304
			36.111	1.22666																													28.145	1.22308			13.031	0.566279									18.806	1.03143
			46.059	1.56458																													28.237	1.22708			20.768	0.902501									18.353	1.00659
			39.898	1.3553																													26.071	1.13295			2.861	0.124329									14.964	0.820716
			50.592	1.71857																													11.647	0.506136			12.42	0.539728									15.482	0.849126
			34.76	1.18077																													17.374	0.75501			4.932	0.214327									10.329	0.566504
			50.212	1.70566																													25.916	1.12621			8.228	0.357559									17.044	0.934795
			50.452	1.71381																													28.583	1.24211			13.019	0.565758									7.124	0.390723
			36.307	1.23332																													15.787	0.686045			3.7	0.160788									22.359	1.2263
			39.98	1.35809																													13.758	0.597872			21.808	0.947696									14.548	0.7979
			54.405	1.84809																													10.78	0.468459			15.542	0.675398									19.172	1.05151
			34.445	1.17007																													14.074	0.611604			16.16	0.702254									21.782	1.19466
			31.797	1.08012																													25.18	1.09423			10.66	0.463245									23.282	1.27692
			46.933	1.59427																													24.275	1.0549			21.545	0.936267									21.643	1.18703
			42.419	1.44094																													42.489	1.84642			5.037	0.21889									17.941	0.983992
			51.918	1.76361																													48.936	2.12658			15.183	0.659798									27.02	1.48194
			51.139	1.73715																													27.26	1.18462			13.237	0.575231									25.28	1.38651
			40.314	1.36943																													27.536	1.19661			5.196	0.225799
			38.091	1.29392																													21.467	0.932877			3.67	0.159485
			48.277	1.63993																													26.249	1.14069			6.913	0.300414
			38.411	1.30479																													30.53	1.32672			11.928	0.518347
			42.333	1.43801																													23.612	1.02609			6.767	0.294069
			46.827	1.59067																													32.271	1.40238			10.668	0.463592
			38.223	1.2984																													29.819	1.29582			14.932	0.64889
			41.968	1.42562																													25.324	1.10049			11.39	0.494968
			42.667	1.44936																													30.604	1.32994			14.214	0.617688
			39.599	1.34514																													29.276	1.27223			17.429	0.7574
			37.824	1.28485																													23.011	0.999974			16.476	0.715987
			32.891	1.11728																													23.094	1.00358			14.596	0.634289
			39.294	1.33478																													30.822	1.33941			12.649	0.549679
			34.764	1.1809																													29.383	1.27688			11.511	0.500226
			40.252	1.36733																													19.356	0.841141			6.447	0.280163
			45.874	1.5583																													33.753	1.46678			2.814	0.122286
			31.376	1.06582																													25.49	1.1077			10.226	0.444384
			29.219	0.992544																													22.921	0.996063			5.032	0.218672
			23.907	0.8121																													28.41	1.23459			12.942	0.562412
			35.932	1.22058																													22.84	0.992543			12.255	0.532557
			23.04	0.782649																													29.762	1.29335			29.479	1.28105
			26.411	0.897158																													26.777	1.16363			14.515	0.630769
			23.987	0.814817																													32.162	1.39764			10.821	0.470241
			28.396	0.964587																													24.443	1.0622			18.39	0.799162
			18.587	0.631384																													35.06	1.52358			12.99	0.564498
			25.922	0.880548																													21.435	0.931486			8.541	0.371161
			29.656	1.00739																													25.465	1.10662			3.847	0.167177
			22.84	0.775855																													24.185	1.05099			4.595	0.199682
			30.459	1.03467																													26.514	1.1522			11.202	0.486798
			26.26	0.892029																													23.581	1.02474			23.935	1.04013
			30.24	1.02723																													22.938	0.996801			6.352	0.276035
			21.147	0.718345																													26.165	1.13703			15.708	0.682612
			19.537	0.663655																													27.635	1.20092			16.75	0.727894
			31.746	1.07838																													25.071	1.08949			15.939	0.69265
			33.01	1.12132																													20.751	0.901762			8.307	0.360992
			32.093	1.09017																													23.035	1.00102			16.721	0.726633
			23.061	0.783362																													20.441	0.888291			6.353	0.276078
			26.83	0.911392																													22.597	0.981983			9.818	0.426654
			26.267	0.892267																													24.021	1.04386			13.47	0.585357
			27.558	0.936121																													22.791	0.990413			11.517	0.500487
			24.505	0.832413																													27.355	1.18875			12.766	0.554764
			26.118	0.887206																													26.423	1.14825			6.694	0.290897
			30.046	1.02064																													25.594	1.11222			15.357	0.667359
			33.784	1.14761																													26.66	1.15855			10.193	0.44295
			29.024	0.98592																													22.838	0.992456			16.511	0.717508
			29.133	0.989622																													26.02	1.13073			17.962	0.780563
			22.766	0.773341																													25.107	1.09106			14.928	0.648716
			29.817	1.01286																													26.598	1.15585			6.72	0.292027
			28.483	0.967543																													22.505	0.977985			9.987	0.433998
			23.459	0.796882																													21.419	0.930791			8.666	0.376593
			26.277	0.892607																													19.239	0.836056			12.584	0.546854
			26.356	0.89529																													20.653	0.897504			5.386	0.234056
			19.975	0.678533																													25.718	1.11761			3.968	0.172435
			32.123	1.09119																													28.033	1.21821			7.366	0.320099
			27.138	0.921854																													21.077	0.915929			14.531	0.631464
			29.209	0.992204																													24.725	1.07446			11.616	0.504789
			34.012	1.15536																													26.819	1.16546			17.793	0.773219
			29.234	0.993053																													21.35	0.927793			15.636	0.679483
			27.194	0.923756																													26.01	1.1303			3.885	0.168828
			30.875	1.0488																													23.906	1.03887			6.032	0.262129
			30.468	1.03497																													27.288	1.18584			14.901	0.647543
			24.408	0.829118																													27.109	1.17806			8.437	0.366641
			24.804	0.84257																													33.827	1.47			17.396	0.755966
			26.687	0.906534																													27.905	1.21265			14.799	0.64311
			23.112	0.785094																													20.615	0.895852			12.697	0.551765
			24.521	0.832957																													25.081	1.08993			13.599	0.590963
			28.262	0.960035																													22.041	0.957821			15.202	0.660623
			25.465	0.865024																													25.039	1.0881			8.609	0.374116
			27.703	0.941047																													22.964	0.997931			5.495	0.238793
			32.166	1.09265																													22.658	0.984634			14.919	0.648325
			25.093	0.852387																													24.382	1.05955			17.011	0.739236
			29.841	1.01367																													24.276	1.05495			20.08	0.872603
			28.37	0.963704																													27.003	1.17345			19.624	0.852787
			28.002	0.951203																													22.307	0.96938			9.278	0.403188
			39.462	1.34049																													22.559	0.980331			13.911	0.604521
			33.035	1.12217																													23.368	1.01549			10.578	0.459681
			26.933	0.91489																													28.715	1.24785			6.778	0.294547
			30.64	1.04081																													16.341	0.71012			3.794	0.164873
			29.683	1.00831																													25.607	1.11279			25.529	1.1094
			27.157	0.922499																													19.241	0.836143			7.088	0.308018
			27.599	0.937514																													22.687	0.985894			15.505	0.67379
			29.248	0.993529																													24.684	1.07268			14.519	0.630942
			26.636	0.904802																													26.556	1.15403			12.812	0.556763
			30.597	1.03935																													21.958	0.954214			20.88	0.907368
			34.094	1.15814																													24.217	1.05238			6.279	0.272862
			27.65	0.939246																													20.003	0.869257			13.309	0.57836
			29.771	1.01129																													25.139	1.09245			13.845	0.601653
			29.33	0.996314																													25.521	1.10905			8.905	0.386979
			27.288	0.926949																													22.745	0.988414			16.403	0.712814
			28.311	0.9617																													21.913	0.952259			9.101	0.395496
			28.147	0.956129																													16.761	0.728372			16.743	0.727589
			27.472	0.9332																													24.996	1.08623			13.062	0.567627
			28.486	0.967644																													17.085	0.742451			20.45	0.888682
			30.077	1.02169																													17.928	0.779085			23.01	0.99993
			29.871	1.01469																													20.876	0.907194			8.925	0.387848
			30.483	1.03548																													22.61	0.982548			18.258	0.793426
			27.114	0.921039																													24.221	1.05256			12.166	0.52869
			23.21	0.788423																													25.1	1.09075			5.165	0.224452
			28.736	0.976137																													17.38	0.755271			12.773	0.555068
			33.396	1.13443																													20.621	0.896113			5.627	0.244529
			28.627	0.972434																													18.276	0.794208			12.576	0.546507
			27.02	0.917846																													21.432	0.931356			10.895	0.473457
			26.813	0.910814																													17.16	0.745711			14.09	0.6123
			29.157	0.990438																													25.313	1.10001			15.766	0.685133
			24.7	0.839037																													23.144	1.00575			10.256	0.445688
			32.921	1.1183																													17.698	0.76909			17.403	0.756271
			28.61	0.971857																													22.42	0.974291			5.546	0.241009
			30.717	1.04343																													16.361	0.710989			12.728	0.553112
			29.07	0.987482																													18.58	0.807419			18.363	0.797989
			28.224	0.958745																													25.814	1.12178			9.612	0.417702
			31.221	1.06055																													12.236	0.531732			13.234	0.575101
			33.758	1.14673																													20.773	0.902718			12.883	0.559848
			32.249	1.09547																													26.929	1.17024			17.268	0.750404
			30.082	1.02186																													18.68	0.811764			15.299	0.664838
			24.072	0.817705																													19.804	0.860609			11.51	0.500182
			27.929	0.948724																													18.993	0.825366			14.46	0.628379
			33.163	1.12652																													14.845	0.645109			16.098	0.69956
			28.741	0.976307																													18.551	0.806158			17.097	0.742973
			32.034	1.08817																													16.973	0.737584			13.666	0.593874
			30.93	1.05066																													19.921	0.865694			5.2	0.225973
			30.568	1.03837																													16.609	0.721766			17.189	0.746971
			20.817	0.707135																													19.538	0.84905			15.696	0.682091
			25.519	0.866858																													19.335	0.840228			15.476	0.67253
			28.703	0.975016																													25.866	1.12404			12.252	0.532427
			29.008	0.985376																													16.896	0.734238			23.293	1.01223
			25.791	0.876098																													22.091	0.959994			12.493	0.5429
			24.842	0.843861																													15.985	0.694649			18.03	0.783518
			22.69	0.770759																													21.664	0.941438			5.458	0.237185
			30.881	1.049																													16.231	0.70534			15.678	0.681308
			27.306	0.927561																													15.732	0.683655			13.337	0.579577
			28.283	0.960749																													15.987	0.694736			14.233	0.618514
			27.402	0.930822																													18.757	0.81511			17.957	0.780345
			21.762	0.739236																													17.869	0.776521			15.602	0.678006
			25.328	0.86037																													16.574	0.720245			13.178	0.572668
			19.94	0.677344																													15.22	0.661405			11.719	0.509265
			35.16	1.19435																													16.66	0.723983			8.069	0.350649
			29.369	0.997639																													16.948	0.736498			12.956	0.56302
			25.359	0.861423																													24.687	1.07281			19.24	0.8361
			29.121	0.989215																													20.276	0.881121			16.104	0.699821
			29.848	1.01391																													17.018	0.73954			4.652	0.202159
			29.109	0.988807																													21.248	0.92336			15.848	0.688696
			27.714	0.94142																													23.691	1.02952			5.438	0.236316
			29.536	1.00331																													13.788	0.599176			9.55	0.415008
			30.639	1.04078																													15.288	0.66436			9.541	0.414617
			23.923	0.812643																													22.104	0.960559			11.247	0.488753
			28.448	0.966354																													17.082	0.742321			17.242	0.749274
			27.309	0.927663																													12.02	0.522345			16.764	0.728502
			28.418	0.965335																													19.704	0.856264			14.358	0.623946
			27.714	0.94142																													12.418	0.539641			6.472	0.281249
			34.607	1.17557																													13.429	0.583575			14.258	0.6196
			28.333	0.962447																													18.14	0.788298			13.702	0.595439
			33.579	1.14065																													17.255	0.749839			18.173	0.789732
			30.252	1.02763																													13.211	0.574102			16.71	0.726155
			25.481	0.865567																													21.446	0.931965			13.324	0.579012
			33.266	1.13002																													17.797	0.773392			14.953	0.649803
			35.755	1.21457																													22.438	0.975073			7.678	0.333658
			24.483	0.831666																													16.5	0.717029			12.53	0.544508
			40.14	1.36352																													21.987	0.955474			13.205	0.573841
			23.31	0.79182																													11.84	0.514523			14.064	0.61117
			35.837	1.21735																													23.232	1.00958			15.414	0.669836
			23.434	0.796032																													13.983	0.60765			13.886	0.603435
			26.563	0.902322																													12.922	0.561543			19.029	0.826931
			28.383	0.964146																													13.883	0.603304			18.595	0.808071
			29.637	1.00674																													13.008	0.56528			5.59	0.242921
			25.651	0.871342																													16.358	0.710859			8.147	0.354039
			25.936	0.881023																													14.605	0.63468			9.198	0.399711
			34.221	1.16246																													12.844	0.558153			15.656	0.680352
			29.789	1.01191																													18.357	0.797728			8.554	0.371725
			26.902	0.913837																													12.017	0.522215			16.831	0.731414
			20.936	0.711178																													24.558	1.0672			14.045	0.610344
			25.644	0.871104																													10.435	0.453467			16.2	0.703993
			30.077	1.02169																													13.649	0.593135			13.309	0.57836
			33.6	1.14136																													17.209	0.74784			21.254	0.923621
			28.684	0.97437																													12.132	0.527212			12.124	0.526865
			25.571	0.868624																													15.852	0.68887			7.322	0.318187
			23.867	0.810741																													14.035	0.60991			7.697	0.334483
			24.668	0.83795																													12.694	0.551635			16.097	0.699517
			26.019	0.883843																													13.417	0.583054			14.858	0.645674
			28.545	0.969649																													12.136	0.527386			20.084	0.872777
			33.22	1.12845																													20.086	0.872864			20.85	0.906065
			23.603	0.801773																													15.113	0.656756			11.339	0.492751
			27.997	0.951034																													11.824	0.513828			11.831	0.514132
			20.958	0.711925																													17.652	0.767091			14.55	0.63229
			27.404	0.93089																													11.883	0.516392			15.13	0.657494
			22.667	0.769978																													10.305	0.447818			4.812	0.209112
			29.519	1.00273																													9.776	0.424829			11.803	0.512915
			25.73	0.874026																													10.779	0.468416			21.471	0.933051
			28.585	0.971007																													9.065	0.393932			14.884	0.646804
			27.584	0.937004																													13.299	0.577926			17.2	0.747449
			29.224	0.992714																													9.624	0.418224			16.337	0.709946
			36.549	1.24154																													10.614	0.461246			18.402	0.799683
			27.035	0.918355																													15.884	0.69026			3.879	0.168567
			22.176	0.753299																													14.694	0.638547			16.57	0.720071
			27.833	0.945463																													15.107	0.656495			12.899	0.560543
			35.256	1.19762																													14.582	0.63368			19.808	0.860783
			29.188	0.991491																													12.938	0.562238			12.556	0.545638
			35.022	1.18967																													16.336	0.709903			15.018	0.652627
			28.161	0.956604																													11.565	0.502572			16.566	0.719898
			30.817	1.04683																													12.652	0.54981			3.471	0.150837
			25.978	0.88245																													19.077	0.829016			9.37	0.407186
			24.405	0.829016																													20.708	0.899894			7.321	0.318144
			26.006	0.883401																													13.894	0.603782			7.849	0.341089
			25.308	0.859691																													12.435	0.540379			10.839	0.471023
			27.188	0.923552																													11.46	0.49801			13.155	0.571668
			27.578	0.9368																													14.382	0.624989			13.424	0.583358
			37.543	1.2753																													10.895	0.473457			13.7	0.595352
			29.237	0.993155																													15.382	0.668445			15.322	0.665838
			38.483	1.30723																													19.315	0.839359			10.119	0.439735
			26.821	0.911086																													18.627	0.809461			13.481	0.585835
			35.05	1.19062																													17.838	0.775174			12.407	0.539163
			25.227	0.856939																													13.704	0.595526			4.35	0.189035
			30.062	1.02118																													13.477	0.585661			12.024	0.522519
			27.422	0.931501																													11.587	0.503529			5.125	0.222714
			35.884	1.21895																													9.612	0.417702			11.137	0.483973
			30.531	1.03711																													17.438	0.757792			12.183	0.529429
			26.648	0.905209																													11.961	0.519781			14.233	0.618514
			34.451	1.17027																													14.959	0.650063			13.419	0.583141
			25.617	0.870187																													10.778	0.468372			12.53	0.544508
			23.473	0.797357																													16.262	0.706687			12.941	0.562368
			26.519	0.900827																													18.567	0.806854			14.945	0.649455
			24.208	0.822325																													25.622	1.11344			9.815	0.426524
			36.636	1.24449																													25.949	1.12765			13.808	0.600045
			27.225	0.924809																													24.376	1.05929			13.251	0.57584
			24.198	0.821985																													12.288	0.533991			19.129	0.831276
			34.081	1.1577																													17.596	0.764658			9.82	0.426741
			29.089	0.988128																													12.608	0.547897			9.106	0.395713
			26.11	0.886934																													24.979	1.0855			14.404	0.625945
			30.082	1.02186																													17.249	0.749578			11.249	0.48884
			30.624	1.04027																													24.551	1.0669			12.715	0.552547
			24.91	0.846171																													21.177	0.920275			10.98	0.477151
			27.542	0.935578																													13.202	0.573711			3.86	0.167741
			38.118	1.29484																													15.442	0.671053			14.013	0.608954
			30.262	1.02797																													15.634	0.679396			14.053	0.610692
			29.625	1.00634																													13.221	0.574536			9.001	0.39115
			25.179	0.855309																													12.664	0.550331			14.824	0.644197
			32.242	1.09523																													12.825	0.557327			10.508	0.456639
			25.7	0.873006																													22.502	0.977854			4.607	0.200203
			28.89	0.981368																													16.519	0.717855			14.262	0.619774
			26.467	0.899061																													13.784	0.599002			11.093	0.482061
			26.017	0.883775																													12.005	0.521693			10.982	0.477237
			31.583	1.07285																													15.447	0.67127			7.585	0.329616
			18.166	0.617083																													10.755	0.467373			7.156	0.310974
			26.636	0.904802																													21.824	0.948391			10.153	0.441212
			27.627	0.938465																													16.962	0.737106			9.983	0.433825
			28.878	0.98096																													12.813	0.556806			5.464	0.237445
			35.088	1.19191																													14.712	0.63933			15.59	0.677484
			31.027	1.05396																													14.22	0.617949			14.441	0.627553
			26.22	0.89067																													20.743	0.901415			13.343	0.579838
			26.311	0.893762																													24.092	1.04695			9.223	0.400798
			22.984	0.780746																													19.658	0.854265			7.664	0.333049
			20.31	0.689913																													13.127	0.570451			6.422	0.279077
			25.987	0.882756																													9.413	0.409054			14.525	0.631203
			24.797	0.842332																													19.016	0.826366			8.185	0.35569
			32.122	1.09116																													14.134	0.614212			4.763	0.206983
			14.414	0.489631																													17.876	0.776825			13.01	0.565367
			35.934	1.22065																													16.41	0.713118			3.931	0.170827
			30.585	1.03895																													23.371	1.01562			10.336	0.449165
			31.931	1.08467																													21.43	0.931269			10.574	0.459507
			21.721	0.737843																													14.498	0.63003			10.06	0.437171
			27.933	0.948859																													14.087	0.612169			5.639	0.24505
			37.265	1.26586																													13.568	0.589616			3.368	0.146361
			21.953	0.745724																													20.334	0.883641			13.909	0.604434
			27.72	0.941624																													14.593	0.634158			9.764	0.424308
			32.405	1.10077																													11.867	0.515696			16.046	0.6973
			30.622	1.0402																													23.21	1.00862			17.206	0.74771
			24.678	0.83829																													13.959	0.606607			12.323	0.535512
			19.353	0.657404																													12.797	0.556111			5.131	0.222974
			38.261	1.29969																													22.194	0.96447			9.655	0.419571
			24.938	0.847122																													12.192	0.52982			7.732	0.336004
			26.443	0.898246																													12.595	0.547333			11.688	0.507918
			26.882	0.913158																													14.057	0.610866			7.96	0.345912
			27.024	0.917982																													11.335	0.492578			6.288	0.273253
			25.007	0.849466																													21.704	0.943176			2.963	0.128761
			36.853	1.25186																													25.342	1.10127			2.577	0.111987
			34.684	1.17819																													10.021	0.435476			10.142	0.440734
			32.979	1.12027																													17.365	0.754619			13.502	0.586747
			21.023	0.714133																													9.813	0.426437			14.409	0.626162
			23.565	0.800482																													7.785	0.338308			14.569	0.633115
			32.17	1.09279																													8.188	0.35582			5.338	0.23197
			23.511	0.798648																													8.115	0.352648			3.391	0.14736
			37.577	1.27646																													20.948	0.910323			12.682	0.551113
			23.718	0.80568																													24.787	1.07715			7.807	0.339264
			24.356	0.827352																													18.523	0.804942			15.635	0.67944
			27.429	0.931739																													19.242	0.836187			14.02	0.609258
			30.424	1.03348																													16.897	0.734282			14.394	0.62551
			30.982	1.05243																													14.319	0.622251			13.064	0.567714
			30.939	1.05097																													19.096	0.829842			13.733	0.596786
			32.976	1.12017																													10.078	0.437953			10.588	0.460116
			29.127	0.989419																													9.226	0.400928			8.243	0.358211
			24.782	0.841823																													9.688	0.421005			12.428	0.540075
			35.646	1.21086																													32.926	1.43084			4.706	0.204506
			23.355	0.793349																													16.235	0.705514			14.051	0.610605
			34.04	1.15631																													5.886	0.255784			15.24	0.662275
			26.114	0.88707																													9.134	0.39693			8.689	0.377592
			31.338	1.06452																													10.104	0.439083			12.635	0.549071
			25.375	0.861966																													14.558	0.632637			9.335	0.405665
			25.346	0.860981																													21.21	0.921709			11.922	0.518086
			28.765	0.977122																													15.958	0.693476			3.624	0.157486
			32.118	1.09102																													11.09	0.481931			6.106	0.265344
			36.203	1.22978																													27.127	1.17884			17.122	0.744059
			23.343	0.792941																													6.159	0.267648			9.763	0.424264
			27.358	0.929327																													19.94	0.866519			6.571	0.285552
			31.802	1.08029																													23.793	1.03396			13.895	0.603826
			50.592	1.71857																													18.675	0.811547			13.23	0.574927
			49.99	1.69812																													12	0.521476			11.988	0.520955
			40.35	1.37065																													18.157	0.789037			10.703	0.465113
			43.197	1.46736																													14.635	0.635983			5.102	0.221714
			44.633	1.51614																													15.939	0.69265			15.191	0.660145
			41.105	1.3963																													24.596	1.06885			11.648	0.506179
			41.022	1.39348																													21.388	0.929444			8.777	0.381416
			35	1.18892																													13.529	0.587921			7.549	0.328052
			59.889	2.03438																													8.394	0.364772			7.949	0.345434
			46.107	1.56621																													20.356	0.884597			15.035	0.653366
			55.832	1.89656																													22.39	0.972987			16.074	0.698517
			48.518	1.64811																													11.918	0.517913			11.057	0.480497
			51.576	1.75199																													22.172	0.963514			6.164	0.267865
			55.703	1.89218																													12.013	0.522041			20.482	0.890073
			46.627	1.58388																													21.642	0.940482			8.129	0.353257
			41.94	1.42466																													27.219	1.18284			10.524	0.457334
			47.369	1.60908																													17.107	0.743407			15.925	0.692042
			57.148	1.94127																													17.929	0.779129			11.206	0.486972
			56.839	1.93077																													17.294	0.751534			12.682	0.551113
			51.544	1.7509																													19.515	0.84805			10.522	0.457248
			46.046	1.56414																													27.887	1.21187			11.832	0.514175
			37.044	1.25835																													17.51	0.76092			14.37	0.624468
			44.394	1.50803																													19.144	0.831928			10.865	0.472153
			44.346	1.50639																													14.66	0.63707			14.625	0.635549
			32.024	1.08783																													20.231	0.879165			4.824	0.209633
			49.015	1.665																													16.41	0.713118			12.323	0.535512
			37.023	1.25764																													13.954	0.60639			8.679	0.377158
			40.644	1.38064																													32.917	1.43045			11.581	0.503268
			38.169	1.29657																													33.081	1.43758			8.623	0.374724
			44.561	1.5137																													12.147	0.527864			12.649	0.549679
			36.768	1.24898																													21.146	0.918928			15.698	0.682178
			54.81	1.86185																													18.581	0.807462			13.287	0.577404
			33.638	1.14265																													31.467	1.36744			16.105	0.699864
			46.776	1.58894																													52.661	2.28845			14.724	0.639851
			36.736	1.24789																													49.316	2.14309			10.407	0.45225
			48.464	1.64628																													33.581	1.45931			16.224	0.705036
			60.592	2.05826																													44.612	1.93867			15.392	0.66888
			54.522	1.85206																													20.227	0.878991			12.813	0.556806
			40.875	1.38849																													25.059	1.08897			4.864	0.211372
			50.343	1.71011																													53.615	2.32991			4.981	0.216456
			36.023	1.22367																													51.686	2.24608			8.283	0.359949
			37.967	1.28971																													27.574	1.19826			11.377	0.494403
			47.058	1.59852																													55.279	2.40222			12.865	0.559066
			32.42	1.10128																													13.703	0.595482			15.646	0.679918
			54.653	1.85651																													26.382	1.14646			11.823	0.513784
			37.962	1.28954																													30.285	1.31608			3.967	0.172391
			35.867	1.21837																													27.551	1.19727			5.072	0.220411
			45.168	1.53432																													20.485	0.890203			17.675	0.768091
			41.466	1.40856																													28.01	1.21721			13.721	0.596264
			53.525	1.8182																													13.101	0.569321			13.261	0.576274
			29.2	0.991898																													32.123	1.39595			16.24	0.705731
			34.239	1.16307																													12.434	0.540336			9.55	0.415008
			48.55	1.6492																													22.102	0.960472			13.3	0.577969
			28.844	0.979805																													17.066	0.741626			16.617	0.722114
			42.223	1.43428																													16.509	0.717421			16.82	0.730936
			43.074	1.46319																													12.556	0.545638			10.163	0.441647
			33.494	1.13776																													28.303	1.22994			13.712	0.595873
			41.057	1.39467																													15.702	0.682351			13.969	0.607042
			37.866	1.28627																													26.241	1.14034			16.218	0.704775
			36.317	1.23366																													33.16	1.44101			4.527	0.196727
			29.409	0.998998																													24.285	1.05534			15.104	0.656364
			26.588	0.903171																													20.563	0.893593			15.502	0.67366
			36.856	1.25197																													27.44	1.19244			14.59	0.634028
			33.645	1.14289																													28.422	1.23512			5.351	0.232535
			32.986	1.12051																													17.306	0.752055			8.876	0.385718
			40.448	1.37398																													18.507	0.804246			9.544	0.414747
			52.533	1.7845																													21.851	0.949564			16.125	0.700733
			59.95	2.03645																													26.169	1.13721			14.162	0.615429
			39.233	1.33271																													16.399	0.71264			14.504	0.630291
			47.391	1.60983																													18.179	0.789993			15.994	0.695041
			26.98	0.916487																													25.809	1.12156			12.853	0.558544
			37.863	1.28617																													15.917	0.691694			11.116	0.483061
			25.602	0.869677																																	13.195	0.573406
			47.677	1.61955																																	15.793	0.686306
			38.562	1.30992																																	12.194	0.529907
			42.92	1.45795																																	20.801	0.903935
			32.4	1.1006																																	14.291	0.621034
			36.325	1.23393																																	17.679	0.768265
			29.499	1.00206																																	14.979	0.650932
			33.182	1.12716																																	15.766	0.685133
			34.838	1.18342																																	19.16	0.832623
			48.649	1.65256																																	5.718	0.248483
			28.745	0.976442																																	14.701	0.638852
			49.367	1.67695																																	7.785	0.338308
			37.727	1.28155																																	11.889	0.516652
			30.496	1.03592																																	8.453	0.367336
			28.083	0.953955																																	7.847	0.341002
			21.009	0.713657																																	14.075	0.611648
			30.476	1.03524																																	8.048	0.349737
			19.405	0.659171																																	15.683	0.681526
			26.068	0.885507																																	14.404	0.625945
			23.302	0.791548																																	15.84	0.688348
			26.795	0.910203																																	15.445	0.671183
			30.737	1.04411																																	13.078	0.568322
			32.924	1.1184																																	11.235	0.488232
			24.87	0.844812																																	19.56	0.850006
			22.321	0.758225																																	6.081	0.264258
			27.932	0.948826																																	16.137	0.701255
			26.78	0.909693																																	6.826	0.296633
			31.505	1.0702																																	14.771	0.641893
			28.706	0.975118																																	18.495	0.803725
			45.715	1.5529																																	16.361	0.710989
			27.687	0.940503																																	5.753	0.250004
			43.313	1.4713																																	11.396	0.495228
			25.525	0.867062																																	11.26	0.489318
			51.566	1.75165																																	12.72	0.552765
			23.552	0.800041																																	15.079	0.655278
			26.538	0.901473																																	4.037	0.175433
			28.185	0.95742																																	11.125	0.483452
			47.417	1.61071																																	19.354	0.841054
			51.804	1.75974																																	15.556	0.676007
			53.069	1.80271																																	16.255	0.706383
			49.874	1.69418																																	13.426	0.583445
			54.161	1.8398																																	6.214	0.270038
			49.561	1.68354																																	17.985	0.781562
			29.604	1.00562																																	3.398	0.147665
			31.034	1.0542																																	12.793	0.555937
			50.923	1.72981																																	14.337	0.623033
			21.836	0.74175																																	16.323	0.709338
			22.395	0.760738																																	20.17	0.876514
			25.53	0.867232																																	18.67	0.81133
			53.73	1.82516																																	16.907	0.734716
			30.18	1.02519																																	13.628	0.592223
			30.539	1.03738																																	14.312	0.621947
			51.321	1.74333																																	12.795	0.556024
			26.831	0.911426																																	8.746	0.380069
			23.762	0.807174																																	15.697	0.682134
			40.27	1.36794																																	17.208	0.747797
			46.682	1.58575																																	16.391	0.712293
			31.375	1.06578																																	19.304	0.838881
			48.003	1.63062																																	14.726	0.639938
			53.82	1.82822																																	8.873	0.385588
			50.876	1.72821																																	16.265	0.706817
			25.463	0.864956																																	11.193	0.486407
			28.684	0.97437																																	16.04	0.69704
			53.951	1.83267																																	13.823	0.600697
			30.578	1.03871																																	16.925	0.735498
			45.824	1.5566																																	15.479	0.672661
			48.762	1.6564																																	18.196	0.790731
			51.288	1.74221																																	15.391	0.668836
			26.653	0.905379																																	19.569	0.850397
			22.835	0.775685																																	18.041	0.783996
			54.662	1.85682																																	16.907	0.734716
			22.924	0.778708																																	18.416	0.800292
			23.711	0.805442																																	15.342	0.666707
			53.636	1.82197																																	19.753	0.858393
			24.136	0.819879																																	13.192	0.573276
			47.545	1.61506																																	20.407	0.886813
			29.868	1.01459																																	16.902	0.734499
			26.452	0.898551																																	16.683	0.724982
			24.634	0.836795																																	15.151	0.658407
			26.934	0.914924																																	14.801	0.643197
			32.605	1.10756																																	18.441	0.801378
			24.735	0.840226																																	12.956	0.56302
			27.119	0.921209																																	11.478	0.498792
			32.4	1.1006																																	11.729	0.509699
			33.076	1.12356																																	20.766	0.902414
			26.841	0.911765																																	18.348	0.797337
			29.289	0.994922																																	11.371	0.494142
			36.797	1.24996																																	9.811	0.42635
			28.489	0.967746																																	12.857	0.558718
			27.263	0.9261																																	6.966	0.302717
			25.954	0.881635																																	12.647	0.549592
			34.877	1.18474																																	14.914	0.648108
			20.599	0.69973																																	17.173	0.746276
			16.5	0.560491																																	14.44	0.627509
			29.34	0.996654																																	8.99	0.390672
			26.66	0.905617																																	8.118	0.352779
			23.701	0.805102																																	8.843	0.384284
			15.928	0.54106																																	21.165	0.919753
			36.514	1.24035																																	14.276	0.620383
			27.984	0.950592																																	17.34	0.753533
			39.586	1.3447																																	9.616	0.417876
			44.231	1.50249																																	16.959	0.736976
			33.61	1.1417																																	19.295	0.83849
			44.419	1.50887																																	14.68	0.637939
			26.424	0.8976																																	13.806	0.599958
			39.389	1.33801																																	13.314	0.578578
			28.441	0.966116																																	11.118	0.483148
			30.558	1.03803																																	13.981	0.607563
			24.487	0.831802																																	11.373	0.494229
			50.844	1.72713																																	12.911	0.561065
			38.143	1.29568																																	5.725	0.248788
			37.506	1.27405																																	11.711	0.508917
			26.163	0.888734																																	13.978	0.607433
			26.789	0.909999																																	11.23	0.488015
			27.043	0.918627																																	15.289	0.664404
			26.733	0.908097																																	12.261	0.532818
			18.956	0.643919																																	12.399	0.538815
			28.979	0.984391																																	12.764	0.554677
			29.493	1.00185																																	9.03	0.392411
			39.04	1.32615																																	7.611	0.330746
			34.894	1.18532																																	11.036	0.479584
			41.299	1.40289																																	6.751	0.293374
			36.239	1.23101																																	11.96	0.519738
			26.614	0.904054																																	7.412	0.322098
			39.167	1.33047																																	12.398	0.538772
			44.092	1.49777																																	11.373	0.494229
			27.602	0.937616																																	5.981	0.259912
			35.357	1.20105																																	14.606	0.634723
			37.845	1.28556																																	14.884	0.646804
			38.045	1.29236																																	13.271	0.576709
			21.332	0.724629																																	15.045	0.653801
			33.971	1.15397																																	19.287	0.838142
			43.226	1.46835																																	8.54	0.371117
			22.215	0.754624																																	17.642	0.766657
			18.132	0.615928																																	12.945	0.562542
			42.933	1.4584																																	8.329	0.361948
			35.344	1.2006																																	14.035	0.60991
			38.843	1.31946																																	15.332	0.666272
			41.934	1.42446																																	13.266	0.576492
			38.208	1.29789																																	13.003	0.565063
			38.13	1.29524																																	4.099	0.178128
			32.084	1.08987																																	13.138	0.570929
			39.247	1.33319																																	7.83	0.340263
			43.601	1.48109																																	11.907	0.517435
			21.849	0.742191																																	10.836	0.470893
			36.787	1.24962																																	16.071	0.698387
			39.051	1.32653																																	3.385	0.1471
			36.585	1.24276																																	8.881	0.385936
			29.03	0.986124																																	9.584	0.416485
			40.395	1.37218																																	8.079	0.351084
			26.247	0.891588																																	11.596	0.50392
			37.949	1.28909																																	13.385	0.581663
			40.808	1.38621																																	8.593	0.37342
			20.929	0.71094																																	9.135	0.396974
			36.327	1.234																																	5.68	0.246832
			41.461	1.40839																																	4.061	0.176476
			35.147	1.19391																																	8.578	0.372768
			34.203	1.16185																																	17.995	0.781997
			35.009	1.18923																																	21.236	0.922839
			28.468	0.967033																																	9.985	0.433911
			39.636	1.3464																																	13.659	0.59357
			37.549	1.27551																																	8.259	0.358906
			19.935	0.677174																																	13.142	0.571103
			35.202	1.19578																																	10.876	0.472631
			22.713	0.771541																																	4.93	0.21424
			41.418	1.40693																																	6.712	0.291679
			31.702	1.07689																																	4.037	0.175433
			18.554	0.630263																																	11.518	0.50053
			32.454	1.10243																																	7.151	0.310756
			38.165	1.29643																																	15.824	0.687653
			38.222	1.29837																																	13.531	0.588008
			36.216	1.23023																																	9.799	0.425829
			21.53	0.731355																																	17.985	0.781562
			27.855	0.94621																																	10.609	0.461028
			24.812	0.842842																																	16.284	0.707643
			33.161	1.12645																																	9.309	0.404535
			34.604	1.17547																																	2.935	0.127544
			35.923	1.22027																																	9.538	0.414487
			29.827	1.0132																																	13.066	0.5678
			35.101	1.19235																																	4.914	0.213544
			35.525	1.20675																																	14.418	0.626553
			30.384	1.03212																																	11.197	0.486581
			30.215	1.02638																																	7.233	0.31432
			31.798	1.08015																																	11.534	0.501225
			34.409	1.16884																																	14.306	0.621686
			25.865	0.878611																																	13.964	0.606824
			32.374	1.09972																																	2.257	0.0980809
			32.374	1.09972																																	2.727	0.118505
			31.379	1.06592																																	13.267	0.576535
			25.929	0.880785																																	12.846	0.55824
			33.97	1.15393																																	7.392	0.321229
			31.398	1.06656																																	7.656	0.332702
			20.208	0.686448																																	10.766	0.467851
			36.582	1.24266																																	12.501	0.543248
			24.724	0.839853																																	10.694	0.464722
			33.877	1.15077																																	17.379	0.755228
			29.479	1.00138																																	11.28	0.490187
			31.015	1.05355																																	7.755	0.337004
			20.587	0.699322																																	12.289	0.534035
			32.391	1.10029																																	13.041	0.566714
			32.894	1.11738																																	7.247	0.314928
			30.584	1.03891																																	13.418	0.583097
			27.777	0.94356																																	12.43	0.540162
			32.315	1.09771																																	11.763	0.511177
			35.952	1.22126																																	12.701	0.551939
			28.497	0.968018																																	13.153	0.571581
			32.027	1.08793																																	4.116	0.178866
			31.141	1.05783																																	16.588	0.720854
			33.662	1.14347																																	5.12	0.222496
			31.47	1.06901																																	16.654	0.723722
			20.453	0.69477																																	9.115	0.396104
			23.739	0.806393																																	12.777	0.555242
			32.999	1.12095																																	14.592	0.634115
			29.364	0.997469																																	12.316	0.535208
			33.462	1.13667																																	13.141	0.57106
			29.325	0.996145																																	12.733	0.553329
			31.783	1.07964																																	12.239	0.531862
			20.358	0.691543																																	8.067	0.350562
			29.938	1.01697																																	13.686	0.594743
			26.78	0.909693																																	7.513	0.326487
			20.103	0.682881																																	11.644	0.506006
			33.324	1.13199																																	14.466	0.628639
			35.975	1.22204																																	6.772	0.294286
			30.495	1.03589																																	5.313	0.230883
			29.569	1.00443																																	16.764	0.728502
			30.27	1.02825																																	13.667	0.593918
			30.17	1.02485																																	15.058	0.654365
			33.201	1.12781																																	14.138	0.614386
			26.249	0.891655																																	15.397	0.669097
			26.526	0.901065																																	9.53	0.414139
			32.475	1.10315																																	11.136	0.48393
			22.53	0.765324																																	3.839	0.166829
			29.898	1.01561																																	12.711	0.552373
			27.608	0.93782																																	10.545	0.458247
			30.468	1.03497																																	13.234	0.575101
			32.473	1.10308																																	19.565	0.850223
			35.68	1.21202																																	17.222	0.748405
			24.651	0.837373																																	17.448	0.758226
			33.567	1.14024																																	11.932	0.518521
			23.713	0.80551																																	13.276	0.576926
			35.824	1.21691																																	13.51	0.587095
			32.922	1.11833																																	14.089	0.612256
			24.633	0.836761																																	14.8	0.643154
			25.139	0.85395																																	11.488	0.499226
			34.441	1.16993																																	13.911	0.604521
			35.473	1.20499																																	12.482	0.542422
			39.818	1.35258																																	20.709	0.899937
			27.499	0.934117																																	14.692	0.63846
			26.078	0.885847																																	15.12	0.65706
			33.966	1.1538																																	11.302	0.491143
			29.655	1.00735																																	6.325	0.274861
			29.045	0.986633																																	14.871	0.646239
			33.886	1.15108																																	11.615	0.504745
			27.217	0.924538																																	19.284	0.838012
			23.605	0.801841																																	17.318	0.752577
			22.707	0.771337																																	14.261	0.619731
			31.717	1.0774																																	17.262	0.750143
			33.455	1.13644																																	9.816	0.426567
			32.667	1.10967																																	6.617	0.287551
			27.079	0.91985																																	15.502	0.67366
			28.942	0.983134																																	12.708	0.552243
			17.058	0.579445																																	4.72	0.205114
			32.379	1.09989																																	7.587	0.329703
			31.082	1.05583																																	15.787	0.686045
			30.086	1.022																																	10.878	0.472718
			36.191	1.22938																																	7.647	0.332311
			19.466	0.661243																																	11.395	0.495185
			20.723	0.703942																																	15.332	0.666272
			32.597	1.10729																																	4.04	0.175564
			14.827	0.50366																																	15.556	0.676007
			31.837	1.08147																																	13.278	0.577013
			34.131	1.1594																																	14.378	0.624815
			29.487	1.00165																																	3.507	0.152401
			23.044	0.782784																																	12.617	0.548289
			25.143	0.854086																																	11.944	0.519042
			25.664	0.871784																																	18.074	0.78543
			37.523	1.27462																																	16.126	0.700777
			33.208	1.12805																																	10.482	0.455509
			29.452	1.00046																																	17.315	0.752446
			26.403	0.896887																																	14.347	0.623468
			21.838	0.741818																																	19.462	0.845747
			32.073	1.08949																																	9.04	0.392845
			34.622	1.17608																																	11.887	0.516565
			22.301	0.757545																																	15.784	0.685915
			28.504	0.968256																																	17.971	0.780954
			25.378	0.862068																																	15.085	0.655539
			25.253	0.857822																																	13.616	0.591701
			32.041	1.0884																																	15.856	0.689044
			30.304	1.0294																																	14.785	0.642502
			37.945	1.28896																																	14.909	0.64789
			27.94	0.949097																																	13.308	0.578317
			29.259	0.993903																																	19.342	0.840532
			32.024	1.08783																																	13.63	0.59231
			37.442	1.27187																																	8.048	0.349737
			24.496	0.832108																																	16.158	0.702167
			37.04	1.25822																																	12.205	0.530385
			27.319	0.928002																																	14.714	0.639416
			34.487	1.17149																																	6.122	0.26604
			25.246	0.857584																																	15.841	0.688392
			32.97	1.11996																																	19.439	0.844748
			36.152	1.22805																																	12.759	0.554459
			21.754	0.738964																																	14.979	0.650932
			31.945	1.08514																																	14.488	0.629595
			22.713	0.771541																																	4.274	0.185732
			28.956	0.98361																																	13.481	0.585835
			27.782	0.94373																																	15.849	0.688739
			27.346	0.92892																																	8.591	0.373333
			29.357	0.997232																																	19.166	0.832884
			19.065	0.647621																																	14.063	0.611126
			30.45	1.03436																																	11.205	0.486928
			28.115	0.955042																																	9.759	0.42409
			33.5	1.13797																																	13.644	0.592918
			31.077	1.05566																																	15.079	0.655278
			33.802	1.14822																																	14.891	0.647108
			35.006	1.18912																																	16.682	0.724939
			30.283	1.02869																																	9.267	0.40271
			23.428	0.795829																																	13.65	0.593179
			29.986	1.0186																																	14.249	0.619209
			30.336	1.03049																																	15.469	0.672226
			32.2	1.09381																																	7.205	0.313103
			27.734	0.9421																																	12.245	0.532123
			26.006	0.883401																																	15.676	0.681221
			38.556	1.30971																																	15.117	0.656929
			28.549	0.969784																																	3.804	0.165308
			34.044	1.15644																																	12.028	0.522693
			33.675	1.14391																																	15.92	0.691825
			23.358	0.793451																																	15.16	0.658798
			30.983	1.05247																																	6.655	0.289202
			29.252	0.993665																																	14.106	0.612995
			31.148	1.05807																																	7.804	0.339133
			23.165	0.786895																																	18.696	0.81246
			30.16	1.02451																																	15.863	0.689348
			26.835	0.911561																																	18.607	0.808592
			37.789	1.28366																																	10.096	0.438735
			26.347	0.894984																																	18.776	0.815936
			27.048	0.918797																																	9.867	0.428784
			27.952	0.949505																																	12.244	0.532079
			34.084	1.1578																																	3.695	0.160571
			23.738	0.806359																																	17.696	0.769003
			28.628	0.972468																																	3.136	0.136279
			21.319	0.724188																																	19.075	0.82893
			36.266	1.23192																																	14.608	0.63481
			32.259	1.09581																																	18.821	0.817892
			24.21	0.822392																																	14.627	0.635636
			31.522	1.07077																																	15.632	0.679309
			30.461	1.03473																																	21.806	0.947609
			32.322	1.09795																																	18.193	0.790601
			34.929	1.18651																																	18.617	0.809027
			22.055	0.749189																																	6.384	0.277425
			21.65	0.735431																																	5.424	0.235707
			38.048	1.29246																																	12.352	0.536773
			21.887	0.743482																																	16.718	0.726503
			21.252	0.721912																																	13.836	0.601262
			21.722	0.737877																																	16.485	0.716378
			24.856	0.844337																																	19.867	0.863347
			24.05	0.816957																																	5.054	0.219628
			24.15	0.820354																																	4.032	0.175216
			27.643	0.939008																																	8.613	0.374289
			29.337	0.996552																																	6.834	0.296981
			27.242	0.925387																																	7.788	0.338438
			34.623	1.17611																																	12.905	0.560804
			30.552	1.03782																																	14.609	0.634854
			27.815	0.944851																																	16.501	0.717073
			33.904	1.15169																																	16.05	0.697474
			23.92	0.812541																																	14.745	0.640764
			30.783	1.04567																																	20.43	0.887813
			26.419	0.89743																																	9.563	0.415573
			28.336	0.962549																																	8.796	0.382242
			27.947	0.949335																																	16.287	0.707773
			29.105	0.988671																																	16.323	0.709338
			21.744	0.738625																																	5.603	0.243486
			31.607	1.07366																																	6.162	0.267778
			26.521	0.900895																																	10.079	0.437996
			30.548	1.03769																																	19.176	0.833319
			31.543	1.07149																																	15.178	0.65958
			34.262	1.16385																																	15.629	0.679179
			28.9	0.981708																																	16.863	0.732804
			30.841	1.04764																																	20.589	0.894722
			21.478	0.729589																																	11.809	0.513176
			28.892	0.981436																																	15.231	0.661883
			28.742	0.976341																																	7.018	0.304977
			26.58	0.902899																																	16.899	0.734369
			28.519	0.968765																																	5.457	0.237141
			30.777	1.04547																																	16.035	0.696822
			31.896	1.08348																																	14.501	0.63016
			25.287	0.858977																																	15.744	0.684177
			28.908	0.981979																																	8.098	0.351909
			19.715	0.669701																																	12.47	0.5419
			27.563	0.936291																																	10.795	0.469111
			29.462	1.0008																																	17.226	0.748579
			29.798	1.01221																																	19.343	0.840576
			26.037	0.884454																																	9.78	0.425003
			27.85	0.94604																																	8.41	0.365468
			29.803	1.01238																																	15.979	0.694389
			26.447	0.898381																																	7.052	0.306454
			22.78	0.773817																																	15.224	0.661579
			27.879	0.947025																																	20.796	0.903718
			19.813	0.67303																																	14.285	0.620774
			28.248	0.95956																																	19.158	0.832536
			31.092	1.05617																																	14.483	0.629378
			28.433	0.965844																																	8.601	0.373768
			28.989	0.984731																																	19.72	0.856959
			33.203	1.12788																																	17.567	0.763397
			25.171	0.855037																																	17.51	0.76092
			27.813	0.944783																																	8.102	0.352083
			30.127	1.02339																																	11.722	0.509395
			29.217	0.992476																																	15.428	0.670444
			24.74	0.840396																																	13.722	0.596308
			29.162	0.990608																																	7.652	0.332528
			27.006	0.91737																																	17.618	0.765614
			32.812	1.11459																																	18.041	0.783996
			34.518	1.17255																																	16.011	0.695779
			23.288	0.791073																																	9.044	0.393019
			26.966	0.916011																																	12.008	0.521824
			23.21	0.788423																																	21.785	0.946696
			26.956	0.915672																																	8.651	0.375941
			22.736	0.772322																																	18.297	0.795121
			24.006	0.815463																																	12.862	0.558935
			38.315	1.30153																																	14.867	0.646065
			22.586	0.767227																																	18.555	0.806332
			29.455	1.00056																																	18.354	0.797598
			26.934	0.914924																																	20.91	0.908672
			20.156	0.684682																																	18.131	0.787907
			29.984	1.01853																																	18.304	0.795425
			26.484	0.899638																																	15.802	0.686697
			27.861	0.946414																																	12.479	0.542292
			24.648	0.837271																																	14.104	0.612908
			24.629	0.836626																																	18.059	0.784778
			27.447	0.932351																																	15.348	0.666968
			22.859	0.7765																																	15.085	0.655539
			7.449	0.253036																																	22.774	0.989675
			23.169	0.787031																																	14.459	0.628335
			26.214	0.890467																																	12.244	0.532079
			23.369	0.793824																																	6.528	0.283683
			24.119	0.819301																																	16.214	0.704601
			21.61	0.734073																																	12.618	0.548332
			25.28	0.858739																																	19.424	0.844096
			22.842	0.775923																																	5.492	0.238662
			26.066	0.885439																																	10.423	0.452945
			21.934	0.745079																																	14.128	0.613951
			23.518	0.798886																																	22.246	0.96673
			25.25	0.85772																																	12.136	0.527386
			21.699	0.737096																																	15.918	0.691738
			23.703	0.80517																																	14.878	0.646543
			23.074	0.783804																																	8.572	0.372508
			31.177	1.05906																																	20.401	0.886553
			20.202	0.686244																																	12.003	0.521606
			32.151	1.09214																																	15.515	0.674225
			32.349	1.09887																																	18.783	0.81624
			27.958	0.949709																																	18.579	0.807375
			20.24	0.687535																																	13.378	0.581359
			33.93	1.15257																																	14.125	0.613821
			20.425	0.693819																																	10.426	0.453076
			31.694	1.07662																																	16.342	0.710163
			32.247	1.0954																																	20.509	0.891246
			22.853	0.776296																																	11.368	0.494012
			17.969	0.610391																																	11.547	0.50179
			31.128	1.05739																																	12.306	0.534774
			29.553	1.00389																																	15.847	0.688653
			30.092	1.0222																																	8.908	0.387109
			24.041	0.816652																																	17.062	0.741452
			21.793	0.740289																																	11.676	0.507396
			21.159	0.718753																																	19.984	0.868431
			31.419	1.06728																																	13.312	0.578491
			30.587	1.03901																																	5.809	0.252438
			27.725	0.941794																																	11	0.47802
			28.848	0.979941																																	18.104	0.786733
			24.573	0.834723																																	15.504	0.673747
			29.619	1.00613																																	18.378	0.79864
			31.384	1.06609																																	13.264	0.576405
			30.92	1.05033																																	11.524	0.500791
			28.178	0.957182																																	20.269	0.880816
			26.829	0.911358																																	12.005	0.521693
			25.355	0.861287																																	16.723	0.72672
			28.634	0.972672																																	14.354	0.623772
			24.535	0.833432																																	7.043	0.306063
			25.166	0.854867																																	17.759	0.771741
			23.951	0.813594																																	9.56	0.415443
			25.561	0.868285																																	16.734	0.727198
			24.524	0.833059																																	15.686	0.681656
			23.406	0.795081																																	19.712	0.856611
			21.261	0.722218																																	12.155	0.528212
			22.701	0.771133																																	17.222	0.748405
			24.598	0.835572																																	13.934	0.605521
			22.883	0.777315																																	17.393	0.755836
																																					18.818	0.817761
																																					18.349	0.79738
																																					13.859	0.602261
																																					9.392	0.408142
																																					11.166	0.485233
																																					16.031	0.696648
																																					18.084	0.785864
																																					10.78	0.468459
																																					15.434	0.670705
																																					20.149	0.875602
																																					14.576	0.63342
																																					16.977	0.737758
																																					5.163	0.224365
																																					16.236	0.705557
																																					5.265	0.228798
																																					14.692	0.63846
																																					17.079	0.742191
																																					16.789	0.729588
																																					16.982	0.737975
																																					17.029	0.740018
																																					17.006	0.739018
																																					19.244	0.836274
																																					5.176	0.22493
																																					16.439	0.714379
																																					3.409	0.148143
																																					13.613	0.591571
																																					8.731	0.379417
																																					7.056	0.306628
																																					11.688	0.507918
																																					8.061	0.350301
																																					13.509	0.587052
																																					11.756	0.510873
																																					23.71	1.03035
																																					16.172	0.702776
																																					19.793	0.860131
																																					20.856	0.906325
																																					19.572	0.850527
																																					15.772	0.685393
																																					14.016	0.609084
																																					18.866	0.819847
																																					4.31	0.187297
																																					6.691	0.290766
																																					11.46	0.49801
																																					17.71	0.769612
																																					16.823	0.731066
																																					10.295	0.447383
																																					14.541	0.631899
																																					19.174	0.833232
																																					13.911	0.604521
																																					20.233	0.879252
																																					16.701	0.725764
																																					5.577	0.242356
																																					15.32	0.665751
[truncated: 1,190 more rows]

## Sheet: F7FS1C
Analysis of the coexpression of plutipotency and ectoderm markers in hESCs cultured for 5 days in YSLC CM at the single cell level
units= fluorescence intensity (a.u.)
			hESC			+ YSLC CM					hESC			+ YSLC CM					hESC			+ YSLC CM					hESC			+ YSLC CM
			OCT4.	SOX1		OCT4.	SOX1				OCT4.	OTX2		OCT4.	OTX2				SOX2	SOX1		SOX2	SOX1				SOX2	OTX2		SOX2	OTX2
		1	0.743232	0.757708	1	16.0977	7.10296			1	0.807267	0.488405	1	5.79404	4.05993			1	0.743232	0.973004	1	16.0977	4.85268			1	0.807267	0.535711	1	5.79404	1.33361
		2	0.758881	0.810949	2	3.30363	1.77305			2	0.520378	0.508862	2	8.58444	3.54582			2	0.758881	0.915236	2	3.30363	2.16139			2	0.520378	0.766629	2	8.58444	1.14044
		3	1.4101	1.01717	3	11.4009	6.92149			3	1.21242	0.886585	3	1.27908	0.482648			3	1.4101	1.16	3	11.4009	4.51427			3	1.21242	0.512868	3	1.27908	0.528799
		4	1.01058	0.946352	4	2.53721	0.868712			4	0.608183	0.648705	4	6.85648	3.38268			4	1.01058	1.0787	4	2.53721	1.56017			4	0.608183	0.615798	4	6.85648	1.46808
		5	1.25682	0.700024	5	2.57435	1.7871			5	1.01155	0.644181	5	5.43171	3.22701			5	1.25682	1.31512	5	2.57435	2.2464			5	1.01155	0.603863	5	5.43171	1.05965
		6	1.11127	0.8751	6	20.9902	8.21649			6	0.697421	0.697775	6	5.20414	3.36366			6	1.11127	0.89762	6	20.9902	6.37014			6	0.697421	0.519565	6	5.20414	1.36995
		7	1.00776	0.877639	7	14.4685	6.72916			7	0.794723	0.551079	7	8.20509	3.51457			7	1.00776	0.916234	7	14.4685	5.47401			7	0.794723	0.662457	7	8.20509	1.29532
		8	0.993993	1.11984	8	14.2483	6.65719			8	0.764977	0.612622	8	0.172026	0.00421482			8	0.993993	1.0603	8	14.2483	4.93677			8	0.764977	0.604187	8	0.172026	0.00993658
		9	0.665364	0.059271	9	12.8882	8.71009			9	0.539372	0.585825	9	3.19323	2.04377			9	0.665364	0.317512	9	12.8882	4.98377			9	0.539372	0.595763	9	3.19323	0.935173
		10	0.722681	0.479762	10	11.3646	7.83595			10	1.12372	1.06117	10	10.2581	3.90655			10	0.722681	0.721462	10	11.3646	4.61462			10	1.12372	1.58867	10	10.2581	1.25385
		11	0.787917	0.59989	11	14.0897	6.94926			11	0.838267	0.49142	11	4.30459	3.83935			11	0.787917	0.890702	11	14.0897	4.90196			11	0.838267	0.671583	11	4.30459	1.26951
		12	0.944218	0.626273	12	11.1734	8.75953			12	0.673051	0.396844	12	2.45226	1.38589			12	0.944218	0.813036	12	11.1734	4.2775			12	0.673051	0.376294	12	2.45226	1.19018
		13	1.09053	0.934609	13	8.25455	3.23221			13	1.16404	0.894192	13	4.40063	2.04086			13	1.09053	0.898476	13	8.25455	3.85215			13	1.16404	0.529069	13	4.40063	1.19865
		14	0.858243	0.675983	14	14.6058	2.52616			14	0.757451	0.555328	14	6.96041	5.13779			14	0.858243	0.775593	14	14.6058	4.28869			14	0.757451	0.5396	14	6.96041	1.32643
		15	1.12277	0.920089	15	6.12309	4.53748			15	0.719462	0.571262	15	3.18266	2.23694			15	1.12277	1.09068	15	6.12309	3.36761			15	0.719462	0.556341	15	3.18266	0.949538
		16	1.30358	0.996538	16	16.2998	8.46111			16	0.42881	0.516058	16	4.21624	1.25574			16	1.30358	1.12541	16	16.2998	4.91459			16	0.42881	0.901583	16	4.21624	1.21394
		17	1.24023	0.988048	17	6.68645	6.33188			17	0.628611	0.692498	17	8.6529	3.45396			17	1.24023	0.95275	17	6.68645	3.50133			17	0.628611	0.525721	17	8.6529	1.28193
		18	0.858054	1.00316	18	11.2882	5.6019			18	0.434007	0.546967	18	7.35338	2.85028			18	0.858054	0.911242	18	11.2882	4.44624			18	0.434007	0.441044	18	7.35338	1.81548
		19	1.00512	0.8484	19	9.43954	7.08419			19	0.580049	0.568315	19	11.4372	4.00959			19	1.00512	1.10452	19	9.43954	4.97564			19	0.580049	0.507738	19	11.4372	1.53644
		20	0.850324	0.587909	20	13.701	6.81664			20	0.647785	0.64144	20	10.8468	5.22719			20	0.850324	0.864172	20	13.701	4.6736			20	0.647785	0.615096	20	10.8468	1.87202
		21	1.06545	1.02713	21	14.8582	7.52364			21	0.644917	0.547515	21	6.45312	2.8781			21	1.06545	1.05909	21	14.8582	5.22746			21	0.644917	0.483112	21	6.45312	1.59633
		22	0.81846	0.58787	22	7.33428	4.70458			22	0.875539	0.747564	22	10.6509	5.30906			22	0.81846	0.872373	22	7.33428	3.60253			22	0.875539	0.53717	22	10.6509	2.37997
		23	1.02171	0.740173	23	12.4773	4.99987			23	0.766769	0.693149	23	5.21023	0.720288			23	1.02171	1.04318	23	12.4773	4.2091			23	0.766769	0.565683	23	5.21023	1.17149
		24	1.09279	0.823129	24	8.97818	4.47377			24	0.786839	0.506189	24	9.85152	4.39064			24	1.09279	1.00931	24	8.97818	4.04963			24	0.786839	1.25255	24	9.85152	1.65207
		25	0.782449	0.571326	25	7.79527	5.25814			25	0.799203	0.748421	25	9.55997	5.70652			25	0.782449	0.731946	25	7.79527	3.96048			25	0.799203	0.540086	25	9.55997	1.83676
		26	1.46667	1.11575	26	6.66043	6.85671			26	0.831458	0.790466	26	5.24643	0.580034			26	1.46667	1.37631	26	6.66043	3.97532			26	0.831458	0.68206	26	5.24643	0.771921
		27	0.808468	0.211931	27	2.55022	0.282945			27	0.501742	0.370904	27	7.65945	4.09457			27	0.808468	0.572477	27	2.55022	0.910814			27	0.501742	0.805511	27	7.65945	1.54681
		28	0.740216	0.759771	28	12.4583	6.68953			28	0.720179	0.600457	28	7.69547	4.27286			28	0.740216	1.21285	28	12.4583	4.41785			28	0.720179	0.670287	28	7.69547	1.5932
		29	0.841651	0.661423	29	15.4552	5.37323			29	0.488482	0.483813	29	11.3673	6.67606			29	0.841651	0.849052	29	15.4552	4.79392			29	0.488482	0.473122	29	11.3673	1.5399
		30	1.47063	0.715021	30	7.38858	3.54071			30	0.992911	0.832889	30	1.20311	0.54491			30	1.47063	0.940055	30	7.38858	3.22319			30	0.992911	1.04723	30	1.20311	0.754262
		31	0.846742	0.520307	31	10.3606	7.2893			31	0.630403	0.622011	31	3.50556	2.21747			31	0.846742	0.740005	31	10.3606	4.21024			31	0.630403	0.507792	31	3.50556	1.22598
		32	1.25267	1.06581	32	11.7139	7.82476			32	0.338676	0.170649	32	3.4484	0.745577			32	1.25267	1.18525	32	11.7139	4.86894			32	0.338676	0.462753	32	3.4484	0.762093
		33	1.22194	1.02018	33	10.2143	6.95541			33	0.802966	0.903444	33	7.38008	3.21724			33	1.22194	1.19466	33	10.2143	4.32977			33	0.802966	0.531283	33	7.38008	1.21864
		34	1.52964	1.06942	34	10.6815	6.40511			34	0.998287	0.997541	34	8.45901	3.23269			34	1.52964	1.05987	34	10.6815	4.23634			34	0.998287	0.675256	34	8.45901	1.57597
		35	0.959113	0.675864	35	16.8655	8.1782			35	0.738456	0.681121	35	8.4884	3.45512			35	0.959113	1.05509	35	16.8655	5.07933			35	0.738456	0.597491	35	8.4884	1.5493
		36	0.850135	0.617465	36	2.04964	1.08909			36	0.930373	0.983046	36	10.9614	2.86217			36	0.850135	0.797346	36	2.04964	1.37489			36	0.930373	0.574756	36	10.9614	2.41929
		37	0.970237	0.672412	37	14.4206	8.61968			37	0.812463	0.623998	37	10.5269	4.05962			37	0.970237	0.848339	37	14.4206	5.14923			37	0.812463	0.911898	37	10.5269	1.44653
		38	1.15576	0.803729	38	7.84391	5.14781			38	0.927685	0.831244	38	10.3115	5.04846			38	1.15576	1.2152	38	7.84391	3.64511			38	0.927685	0.492509	38	10.3115	2.29314
		39	0.696285	0.582315	39	3.97239	1.94829			39	0.522707	0.638048	39	5.73921	2.95993			39	0.696285	0.826729	39	3.97239	2.56541			39	0.522707	0.497963	39	5.73921	1.25941
		40	0.814312	0.616275	40	11.601	8.77286			40	0.761572	0.667963	40	3.58674	0.612142			40	0.814312	0.969724	40	11.601	4.69008			40	0.761572	0.71241	40	3.58674	0.840397
		41	1.04226	0.931594	41	11.8165	6.62946			41	0.774116	0.587264	41	8.21979	4.38248			41	1.04226	1.03256	41	11.8165	4.84698			41	0.774116	0.47755	41	8.21979	1.32799
		42	0.955907	0.931554	42	3.21426	2.34711			42	0.591339	0.760997	42	2.30407	0.179147			42	0.955907	1.06978	42	3.21426	2.11782			42	0.591339	0.64604	42	2.30407	0.644204
		43	1.28077	1.10596	43	0.123495	0.00936275			43	0.435799	0.484944	43	6.27679	4.03447			43	1.28077	1.27112	43	0.123495	0.0114824			43	0.435799	0.485056	43	6.27679	1.21275
		44	0.695531	0.645157	44	0.75907	0.176662			44	0.620726	0.797628	44	7.01399	3.66041			44	0.695531	0.812465	44	0.75907	0.269514			44	0.620726	0.522427	44	7.01399	1.2492
		45	1.56829	1.45111	45	0.169499	0.00960079			45	0.725734	0.781009	45	7.06273	3.97001			45	1.56829	1.39008	45	0.169499	0.0187569			45	0.725734	1.75419	45	7.06273	1.33582
		46	1.22213	1.21498	46	0.897459	0.117114			46	0.641334	0.506634	46	5.86877	3.83929			46	1.22213	1.23852	46	0.897459	0.197696			46	0.641334	0.868047	46	5.86877	1.79971
		47	0.595792	0.550141	47	6.7696	4.89509			47	1.01173	1.63292	47	6.53089	3.83497			47	0.595792	0.724458	47	6.7696	3.02292			47	1.01173	0.754208	47	6.53089	1.50858
		48	0.921216	0.615918	48	2.34659	1.65844			48	0.888262	0.861878	48	8.80073	3.99105			48	0.921216	0.910814	48	2.34659	1.7645			48	0.888262	0.995602	48	8.80073	1.59612
		49	0.960432	0.943495	49	7.04468	4.2708			49	0.681652	0.657134	49	5.23299	4.16396			49	0.960432	1.09952	49	7.04468	3.08868			49	0.681652	0.472636	49	5.23299	1.37092
		50	1.32187	1.22426	50	13.2385	6.4672			50	0.831099	1.22699	50	3.426	0.567629			50	1.32187	1.3495	50	13.2385	4.04336			50	0.831099	0.661917	50	3.426	0.707334
		51	1.04037	0.726327	51	0.953834	0.0883907			51	0.714265	1.22888	51	6.51082	2.79507			51	1.04037	0.975714	51	0.953834	0.176942			51	0.714265	0.832783	51	6.51082	1.35262
		52	0.905001	0.581205	52	9.44708	4.60072			52	0.866759	0.73749	52	11.3551	3.58832			52	0.905001	0.812822	52	9.44708	3.33216			52	0.866759	0.550238	52	11.3551	1.9109
		53	1.32545	0.450324	53	8.63786	4.38204			53	0.647605	0.3989	53	3.12782	1.20921			53	1.32545	0.775165	53	8.63786	3.24772			53	0.647605	0.563091	53	3.12782	1.1143
		54	0.100304	0.00829159	54	8.62164	3.85606			54	0.579512	0.621017	54	9.26215	3.30997			54	0.100304	0.0187569	54	8.62164	3.80372			54	0.579512	0.632917	54	9.26215	1.97803
		55	1.19517	1.11325	55	10.1485	5.48606			55	0.961015	1.61218	55	8.72672	4.6571			55	1.19517	1.18582	55	10.1485	3.80294			55	0.961015	0.609102	55	8.72672	1.37395
		56	1.32017	1.17522	56	12.4319	6.88099			56	0.499412	0.469386	56	14.3797	4.01405			56	1.32017	1.18076	56	12.4319	4.26887			56	0.499412	0.483436	56	14.3797	3.16918
		57	0.964392	0.717956	57	10.8266	5.05204			57	0.621622	0.696027	57	11.565	4.30165			57	0.964392	1.05402	57	10.8266	3.67956			57	0.621622	0.540734	57	11.565	2.25253
		58	1.21911	1.06973	58	9.36167	3.24832			58	0.699571	0.685336	58	8.1008	3.59274			58	1.21911	1.18717	58	9.36167	3.88324			58	0.699571	0.68503	58	8.1008	1.44032
		59	1.53492	1.25374	59	13.8186	7.15628			59	0.794544	0.656415	59	5.04483	0.563312			59	1.53492	1.2152	59	13.8186	4.71518			59	0.794544	0.51708	59	5.04483	0.629515
		60	1.40294	1.12655	60	2.23271	1.75889			60	0.71982	0.70898	60	7.79384	3.30726			60	1.40294	1.18076	60	2.23271	1.93239			60	0.71982	0.533929	60	7.79384	1.83973
		61	1.43725	0.891723	61	3.52479	2.133			61	0.626102	0.623793	61	9.70978	4.9901			61	1.43725	1.24309	61	3.52479	2.22743			61	0.626102	0.564819	61	9.70978	1.74992
		62	1.00681	0.761398	62	11.3368	4.19995			62	0.988969	1.02567	62	4.50224	3.87465			62	1.00681	0.956672	62	11.3368	4.26701			62	0.988969	0.760365	62	4.50224	1.45398
		63	0.973442	0.766079	63	11.2045	7.37126			63	0.225963	0.17082	63	3.72973	1.55931			63	0.973442	1.01487	63	11.2045	4.14641			63	0.225963	0.273958	63	3.72973	1.04383
		64	0.720419	0.692367	64	7.35181	5.82716			64	0.509089	0.448689	64	3.95337	1.69048			64	0.720419	1.03348	64	7.35181	3.75138			64	0.509089	0.459783	64	3.95337	1.51636
		65	1.11127	1.10072	65	11.6745	5.87604			65	0.669288	0.705862	65	6.71868	1.69754			65	1.11127	1.114	65	11.6745	3.81521			65	0.669288	0.974487	65	6.71868	1.5952
		66	1.20931	1.12143	66	7.74624	4.59493			66	0.704051	0.588532	66	7.53849	2.7286			66	1.20931	1.15423	66	7.74624	2.7661			66	0.704051	0.573406	66	7.53849	1.99331
		67	1.07243	1.03312	67	8.40652	6.82049			67	0.644021	0.55872	67	6.26443	4.48203			67	1.07243	1.09945	67	8.40652	3.8913			67	0.644021	0.450386	67	6.26443	1.30628
		68	1.17141	1.25052	68	11.45	7.05122			68	0.732901	0.970744	68	4.94986	2.94677			68	1.17141	1.17869	68	11.45	3.88467			68	0.732901	2.25555	68	4.94986	1.50096
		69	0.857866	0.762152	69	7.73795	5.94451			69	1.15651	0.906562	69	5.65356	3.33594			69	0.857866	0.969866	69	7.73795	3.77648			69	1.15651	0.869397	69	5.65356	1.20362
		70	0.590513	0.627741	70	11.1328	6.81275			70	0.217899	0.145771	70	4.20012	2.42808			70	0.590513	1.03498	70	11.1328	4.11389			70	0.217899	0.222871	70	4.20012	0.995278
		71	0.828076	0.587433	71	10.5855	7.59113			71	0.738277	0.646957	71	10.1603	3.15344			71	0.828076	0.88357	71	10.5855	3.86085			71	0.738277	0.853898	71	10.1603	2.96224
		72	1.13125	1.18863	72	9.99989	7.33536			72	0.860666	0.777102	72	2.24924	0.606968			72	1.13125	1.18282	72	9.99989	4.21523			72	0.860666	0.622657	72	2.24924	0.747566
		73	1.02491	1.01689	73	11.706	4.84633			73	0.274883	0.213688	73	4.15281	3.38618			73	1.02491	1.14667	73	11.706	4.06161			73	0.274883	0.453195	73	4.15281	1.20978
		74	1.66671	1.57068	74	15.9789	6.5212			74	1.06799	1.31612	74	8.57656	3.78525			74	1.66671	1.21435	74	15.9789	6.0706			74	1.06799	0.635779	74	8.57656	1.29046
		75	2.05134	1.47777	75	14.4018	5.76321			75	0.595818	0.584934	75	1.31761	0.59004			75	2.05134	1.31327	75	14.4018	5.61273			75	0.595818	0.605754	75	1.31761	0.773001
		76	0.891049	0.824041	76	20.6246	6.10745			76	0.674664	0.644079	76	8.95824	3.98824			76	0.891049	1.04725	76	20.6246	5.88645			76	0.674664	0.968979	76	8.95824	1.49205
		77	1.52493	1.32181	77	18.1747	7.37547			77	0.798486	0.661349	77	5.66861	1.83019			77	1.52493	1.11885	77	18.1747	6.81802			77	0.798486	0.688972	77	5.66861	1.33717
		78	1.59318	1.49737	78	18.2316	6.96862			78	0.544031	0.461848	78	4.34992	3.17071			78	1.59318	1.29565	78	18.2316	6.97856			78	0.544031	0.525883	78	4.34992	1.17246
		79	0.619737	0.602072	79	12.3378	4.78345			79	0.569656	0.670121	79	8.59448	2.93293			79	0.619737	0.894981	79	12.3378	5.17932			79	0.569656	0.48214	79	8.59448	1.48395
		80	0.800737	0.75263	80	14.4005	6.89146			80	0.756555	0.747461	80	8.53552	4.25131			80	0.800737	1.04582	80	14.4005	5.76186			80	0.756555	0.480952	80	8.53552	1.34668
		81	0.90123	0.861214	81	15.6484	7.5319			81	0.372722	0.453178	81	6.0933	4.07134			81	0.90123	0.904253	81	15.6484	5.90007			81	0.372722	0.419713	81	6.0933	1.27604
		82	1.74175	1.40076	82	21.9212	7.54999			82	0.759064	0.76062	82	5.20378	2.87152			82	1.74175	1.26869	82	21.9212	6.76032			82	0.759064	0.562065	82	5.20378	1.202
		83	1.13446	0.978288	83	18.4931	8.6121			83	0.652444	0.608647	83	3.83295	3.25637			83	1.13446	0.99333	83	18.4931	7.2674			83	0.652444	0.54986	83	3.83295	1.23586
		84	0.476634	0.553354	84	12.5976	6.67901			84	0.341364	0.244151	84	4.92657	3.14086			84	0.476634	0.943906	84	12.5976	4.43568			84	0.341364	0.327583	84	4.92657	1.07877
		85	0.997198	0.884899	85	10.5482	4.28786			85	0.829308	0.399585	85	7.17688	2.98532			85	0.997198	0.990335	85	10.5482	4.05256			85	0.829308	0.65279	85	7.17688	1.39209
		86	0.926683	0.825112	86	10.123	6.96307			86	1.04918	0.922873	86	6.31711	3.02391			86	0.926683	0.957457	86	10.123	4.10127			86	1.04918	0.829057	86	6.31711	1.43589
		87	1.25908	1.25774	87	9.33603	3.81084			87	0.886291	0.846321	87	5.27994	3.96378			87	1.25908	1.12349	87	9.33603	3.51353			87	0.886291	1.0556	87	5.27994	1.28673
		88	0.905944	0.867403	88	11.5497	6.59915			88	1.05706	0.973211	88	5.1692	2.53406			88	0.905944	0.992474	88	11.5497	4.96194			88	1.05706	0.646904	88	5.1692	1.01256
		89	1.06149	0.86657	89	6.71982	5.10889			89	0.940049	0.984074	89	6.13218	2.41481			89	1.06149	1.05352	89	6.71982	3.58035			89	0.940049	0.659325	89	6.13218	1.0657
		90	1.31772	1.06386	90	8.73307	6.79216			90	0.86873	0.858452	90	3.99709	4.07607			90	1.31772	1.05188	90	8.73307	4.13514			90	0.86873	0.579184	90	3.99709	1.05425
		91	0.982492	0.872362	91	12.716	6.04294			91	1.17802	0.836418	91	2.51158	1.85257			91	0.982492	1.10259	91	12.716	4.64522			91	1.17802	0.645176	91	2.51158	0.959474
		92	0.958547	0.525425	92	8.37843	1.75718			92	1.36241	0.838131	92	6.98371	2.38075			92	0.958547	0.942123	92	8.37843	2.40409			92	1.36241	1.06359	92	6.98371	1.22026
		93	1.12786	0.999355	93	12.286	7.08038			93	0.812822	0.675604	93	11.825	2.11073			93	1.12786	1.13839	93	12.286	4.72595			93	0.812822	0.645176	93	11.825	1.36887
		94	0.992485	0.964006	94	2.78778	1.16011			94	1.2006	1.09157	94	5.83329	4.16797			94	0.992485	1.01929	94	2.78778	1.77891			94	1.2006	0.99031	94	5.83329	1.26643
		95	0.995313	0.744458	95	8.8971	5.8858			95	1.39574	1.28936	95	5.97395	3.95826			95	0.995313	0.983345	95	8.8971	3.9132			95	1.39574	1.02952	95	5.97395	1.36072
		96	0.501144	0.496424	96	7.06806	4.422			96	1.21099	0.980853	96	11.3435	3.29814			96	0.501144	0.946046	96	7.06806	3.11222			96	1.21099	0.688324	96	11.3435	1.40036
		97	0.769062	0.580848	97	11.97	7.11533			97	0.613917	0.616254	97	4.37017	1.66783			97	0.769062	0.806332	97	11.97	5.02927			97	0.613917	0.665589	97	4.37017	0.75113
		98	0.726641	0.690741	98	15.2463	7.39816			98	0.852961	0.807634	98	6.57156	3.50755			98	0.726641	0.877437	98	15.2463	4.50743			98	0.852961	0.704957	98	6.57156	1.33139
		99	0.834675	0.910567	99	13.6133	7.07403			99	0.602807	0.652508	99	5.32599	2.3422			99	0.834675	0.836785	99	13.6133	4.31708			99	0.602807	0.991606	99	5.32599	1.12516
		100	0.972122	1.03474	100	14.444	6.8669			100	0.85314	0.962623	100	2.97766	1.9041			100	0.972122	0.964303	100	14.444	4.68009			100	0.85314	1.53628	100	2.97766	0.838183
		101	0.795647	0.705182	101	20.1823	7.04539			101	0.861921	0.910743	101	6.99338	3.15967			101	0.795647	0.711264	101	20.1823	5.36497			101	0.861921	1.15221	101	6.99338	1.24034
		102	0.869178	0.830508	102	7.16365	1.01618			102	1.27693	1.05398	102	3.42672	2.14126			102	0.869178	0.940198	102	7.16365	1.95992			102	1.27693	0.716136	102	3.42672	1.08584
		103	0.935545	0.992491	103	9.57039	4.7462			103	0.940228	0.979276	103	3.19771	1.95591			103	0.935545	0.96951	103	9.57039	3.63791			103	0.940228	0.697451	103	3.19771	0.952238
		104	0.662913	0.406724	104	8.86298	6.38869			104	0.736485	0.736976	104	4.35333	3.80173			104	0.662913	0.740647	104	8.86298	4.02603			104	0.736485	0.633025	104	4.35333	1.23797
		105	0.710237	0.860461	105	11.6085	6.09317			105	1.46813	1.05072	105	2.60099	1.42718			105	0.710237	0.931711	105	11.6085	4.11603			105	1.46813	0.630757	105	2.60099	1.12553
		106	0.926495	0.904616	106	7.32127	4.61667			106	1.02642	0.898098	106	1.89049	0.793173			106	0.926495	0.94248	106	7.32127	3.40084			106	1.02642	0.723372	106	1.89049	0.873717
		107	1.02058	1.06993	107	11.5689	6.87508			107	0.861742	0.83001	107	1.79498	0.767645			107	1.02058	0.979066	107	11.5689	5.01394			107	0.861742	0.632431	107	1.79498	0.841801
		108	0.792253	0.60719	108	12.923	8.101			108	0.843285	0.84382	108	6.29346	3.38844			108	0.792253	0.771029	108	12.923	4.91352			108	0.843285	1.04782	108	6.29346	1.26589
		109	0.938373	0.811266	109	11.4656	8.89723			109	0.9999	0.982703	109	5.45501	3.46684			109	0.938373	1.14488	109	11.4656	4.50272			109	0.9999	0.759771	109	5.45501	1.21264
		110	1.08902	0.758779	110	5.87497	2.55496			110	0.900268	0.822711	110	6.84824	3.1962			110	1.08902	1.22319	110	5.87497	2.93435			110	0.900268	0.567735	110	6.84824	1.4306
		111	0.450992	0.305242	111	3.64923	2.5621			111	0.87769	0.744891	111	5.56181	2.71605			111	0.450992	0.650928	111	3.64923	2.38833			111	0.87769	0.579184	111	5.56181	1.21594
		112	1.09958	0.909615	112	11.0533	8.01745			112	0.643842	0.570576	112	3.15452	2.30167			112	1.09958	1.00638	112	11.0533	4.22814			112	0.643842	0.54392	112	3.15452	0.943921
		113	0.809787	0.919176	113	16.8605	7.08332			113	1.04255	0.720631	113	1.05473	0.793722			113	0.809787	1.20379	113	16.8605	5.13874			113	1.04255	0.589931	113	1.05473	0.951914
		114	0.935733	0.700143	114	19.6461	6.147			114	1.07301	0.842346	114	6.50831	2.83198			114	0.935733	0.841777	114	19.6461	5.86855			114	1.07301	0.808859	114	6.50831	1.75554
		115	1.244	1.35141	115	15.3481	6.62411			115	1.01943	0.985067	115	6.11605	4.85886			115	1.244	1.18361	115	15.3481	4.68394			115	1.01943	1.80905	115	6.11605	1.27156
		116	1.29359	1.1661	116	15.5434	9.11813			116	1.25525	1.2064	116	8.45112	3.29965			116	1.29359	1.114	116	15.5434	5.27382			116	1.25525	2.82172	116	8.45112	1.21631
		117	0.956285	0.950875	117	9.21065	4.79678			117	0.537222	0.518251	117	8.25222	4.55416			117	0.956285	0.933993	117	9.21065	3.91569			117	0.537222	0.81831	117	8.25222	1.44145
		118	1.17217	0.965593	118	5.73526	4.56077			118	0.984668	0.958819	118	7.47685	4.62136			118	1.17217	1.15323	118	5.73526	3.5004			118	0.984668	0.757232	118	7.47685	1.3227
		119	1.46195	1.52855	119	12.7311	6.48799			119	0.91317	0.64192	119	7.31916	5.5014			119	1.46195	1.22469	119	12.7311	4.61983			119	0.91317	0.746216	119	7.31916	1.39242
		120	0.734371	0.348842	120	9.05077	5.29904			120	0.843464	0.873872	120	7.28762	2.84123			120	0.734371	0.74136	120	9.05077	4.54901			120	0.843464	0.968061	120	7.28762	1.72686
		121	0.975516	0.663644	121	5.85083	4.96944			121	1.00868	0.949396	121	0.136904	0.0253917			121	0.975516	0.912383	121	5.85083	3.49477			121	1.00868	0.680494	121	0.136904	0.0130148
		122	1.38842	1.02229	122	6.06803	3.87162			122	0.623235	0.720562	122	11.1783	3.94993			122	1.38842	1.07043	122	6.06803	3.10102			122	0.623235	0.8438	122	11.1783	1.48131
		123	0.945538	0.673444	123	10.7953	7.6066			123	1.20454	1.16959	123	6.54074	2.79504			123	0.945538	0.936489	123	10.7953	5.44691			123	1.20454	1.62841	123	6.54074	1.56091
		124	1.46101	1.22442	124	8.64201	4.96944			124	0.974275	1.15907	124	5.3009	0.785223			124	1.46101	1.34729	124	8.64201	3.70823			124	0.974275	4.48135	124	5.3009	1.14714
		125	1.24645	1.07299	125	10.5512	5.67418			125	0.55102	0.798622	125	9.64796	4.26803			125	1.24645	1.10658	125	10.5512	4.46542			125	0.55102	1.45296	125	9.64796	1.64499
		126	1.37108	1.17768	126	13.4063	6.20258			126	0.638108	0.617762	126	5.23532	0.655387			126	1.37108	1.08997	126	13.4063	5.04025			126	0.638108	0.88981	126	5.23532	0.807185
		127	1.89824	1.40382	127	4.80179	6.98941			127	0.568939	0.563929	127	7.99561	4.73526			127	1.89824	1.2938	127	4.80179	4.25817			127	0.568939	0.663483	127	7.99561	1.61216
		128	1.25154	0.930443	128	11.7988	2.53711			128	1.14057	0.716758	128	7.92017	4.85259			128	1.25154	1.06886	128	11.7988	3.79495			128	1.14057	0.664455	128	7.92017	1.63505
		129	1.05169	1.05422	129	14.3671	5.34585			129	0.968003	0.815481	129	11.3655	7.25925			129	1.05169	1.00438	129	14.3671	5.12961			129	0.968003	0.736819	129	11.3655	1.56258
		130	1.20384	1.2627	130	11.9677	5.59531			130	1.24307	1.14132	130	1.14523	0.528085			130	1.20384	1.11864	130	11.9677	4.25275			130	1.24307	1.62668	130	1.14523	0.809562
		131	1.05734	0.947304	131	6.91515	5.60027			131	0.879482	0.92935	131	10.8104	3.55631			131	1.05734	1.04703	131	6.91515	3.73462			131	0.879482	0.770085	131	10.8104	1.55351
		132	1.36731	1.1534	132	7.05901	7.29771			132	1.06996	0.884597	132	3.63906	2.47293			132	1.36731	1.20936	132	7.05901	4.24112			132	1.06996	0.982966	132	3.63906	1.2566
		133	1.17744	1.04351	133	9.88751	6.34148			133	0.98646	0.900805	133	6.64629	3.5852			133	1.17744	1.06301	133	9.88751	3.96747			133	0.98646	0.754856	133	6.64629	1.31568
		134	0.83788	0.975353	134	0.169688	0.00662534			134	1.35649	1.04685	134	12.1689	5.56712			134	0.83788	0.881288	134	0.169688	0.00884355			134	1.35649	1.12624	134	12.1689	4.00725
		135	1.05565	0.704428	135	11.2296	4.38716			135	1.39914	1.13046	135	8.70415	3.55199			135	1.05565	0.910172	135	11.2296	4.74535			135	1.39914	1.38243	135	8.70415	1.63684
		136	0.542058	0.415968	136	10.0189	6.35699			136	0.504967	0.396193	136	5.78455	3.36709			136	0.542058	0.670184	136	10.0189	4.70341			136	0.504967	0.572326	136	5.78455	1.50372
		137	1.48948	1.01221	137	15.1957	6.57602			137	0.699571	0.484155	137	11.1939	3.25654			137	1.48948	1.08597	137	15.1957	5.1125			137	0.699571	0.572002	137	11.1939	2.5145
		138	0.91933	0.613538	138	9.18614	5.70076			138	0.645993	0.513179	138	10.7883	4.54306			138	0.91933	0.804335	138	9.18614	4.08871			138	0.645993	0.538628	138	10.7883	1.52532
		139	0.894066	0.754296	139	12.7126	5.80574			139	1.22801	0.939458	139	6.66385	4.64846			139	0.894066	0.88735	139	12.7126	4.47006			139	1.22801	0.691565	139	6.66385	1.31573
		140	1.05395	0.553632	140	1.70989	1.97316			140	0.985206	0.782037	140	1.76362	0.964028			140	1.05395	0.885068	140	1.70989	2.7798			140	0.985206	1.06321	140	1.76362	1.13504
		141	1.13069	0.59025	141	16.2757	6.90051			141	1.49537	1.27065	141	7.98486	4.61574			141	1.13069	0.804192	141	16.2757	5.9873			141	1.49537	1.29608	141	7.98486	1.46883
		142	0.908583	0.593543	142	9.35752	7.99833			142	0.621443	0.696747	142	10.6663	4.81078			142	0.908583	0.721605	142	9.35752	4.58873			142	0.621443	1.26346	142	10.6663	1.44588
		143	0.996255	0.71875	143	11.5868	8.92703			143	0.54206	0.490358	143	2.32056	0.188022			143	0.996255	0.92087	143	11.5868	4.99689			143	0.54206	0.661161	143	2.32056	0.664401
		144	1.06658	0.777307	144	4.19148	2.71877			144	0.795978	0.63421	144	6.56296	5.1784			144	1.06658	0.984701	144	4.19148	2.72538			144	0.795978	0.751778	144	6.56296	1.37994
		145	0.882376	0.635159	145	11.693	7.89097			145	1.36223	1.32397	145	7.40159	4.98246			145	0.882376	0.846413	145	11.693	4.85732			145	1.36223	1.26999	145	7.40159	1.46489
		146	1.12182	0.826818	146	0.852398	0.0996181			146	1.0318	0.835082	146	7.03782	4.23661			146	1.12182	0.833718	146	0.852398	0.217879			146	1.0318	0.82263	146	7.03782	1.37951
		147	1.34261	1.22815	147	2.07434	2.43622			147	0.966391	0.881479	147	8.11872	2.62826			147	1.34261	1.10109	147	2.07434	2.36615			147	0.966391	1.4252	147	8.11872	2.71976
		148	0.814878	0.484126	148	17.0945	7.99158			148	0.723404	0.730739	148	6.77889	4.30439			148	0.814878	0.869093	148	17.0945	5.73347			148	0.723404	2.09608	148	6.77889	1.58159
		149	0.988525	0.733548	149	10.6605	7.84527			149	1.0051	0.977152	149	4.88284	3.523			149	0.988525	0.915806	149	10.6605	4.56612			149	1.0051	1.26011	149	4.88284	1.06856
		150	0.626902	0.517133	150	12.755	8.89814			150	1.04989	0.937745	150	5.10594	3.52465			150	0.626902	0.64294	150	12.755	5.07527			150	1.04989	0.8836	150	5.10594	1.07396
		151	0.970425	0.879702	151	21.3001	6.66568			151	1.0662	0.958339	151	6.63016	2.95452			151	0.970425	0.996112	151	21.3001	6.37363			151	1.0662	0.858866	151	6.63016	1.38065
		152	0.76416	0.968767	152	7.19476	5.54326			152	0.670721	0.65501	152	12.2249	3.80618			152	0.76416	0.749419	152	7.19476	3.70459			152	0.670721	0.656139	152	12.2249	1.99196
		153	0.839766	1.03911	153	10.7637	7.12148			153	1.16637	0.379333	153	8.89176	3.17276			153	0.839766	1.05559	153	10.7637	4.78079			153	1.16637	0.808589	153	8.89176	1.90491
		154	1.12842	1.24854	154	13.118	7.68805			154	0.882349	0.852284	154	5.9107	5.97606			154	1.12842	1.18111	154	13.118	4.83357			154	0.882349	0.791686	154	5.9107	1.49259
		155	1.3443	1.42056	155	14.9214	7.60418			155	0.63542	0.521541	155	14.4435	3.73117			155	1.3443	1.22718	155	14.9214	5.37609			155	0.63542	0.739951	155	14.4435	2.99043
		156	1.16802	1.29468	156	12.0716	7.37063			156	0.578078	0.676838	156	9.37433	3.11355			156	1.16802	1.21057	156	12.0716	5.05024			156	0.578078	1.02142	156	9.37433	1.6917
		157	1.27926	1.13682	157	9.90147	5.83279			157	1.27729	0.982566	157	10.5319	3.912			157	1.27926	1.30093	157	9.90147	4.18585			157	1.27729	1.35402	157	10.5319	2.089
		158	1.10599	1.06378	158	11.9445	7.62056			158	0.798665	0.560468	158	4.90883	2.54592			158	1.10599	1.0409	158	11.9445	5.12883			158	0.798665	0.821388	158	4.90883	1.43821
		159	1.18857	1.15368	159	10.6796	5.5289			159	0.836475	0.687255	159	3.43424	1.86634			159	1.18857	1.23474	159	10.6796	4.40252			159	0.836475	0.795737	159	3.43424	1.32065
		160	1.11749	0.945439	160	12.9004	7.03686			160	1.02714	0.957174	160	7.35106	3.29239			160	1.11749	1.27112	160	12.9004	4.99011			160	1.02714	1.33053	160	7.35106	1.82677
		161	1.39219	1.324	161	11.502	6.18628			161	0.921771	0.834019	161	5.7634	3.12157			161	1.39219	1.1789	161	11.502	4.85803			161	0.921771	0.711762	161	5.7634	1.21486
		162	0.959113	0.973845	162	18.3936	8.81055			162	0.807984	0.782105	162	9.77716	4.84272			162	0.959113	1.11814	162	18.3936	5.8433			162	0.807984	0.780238	162	9.77716	1.69948
		163	1.11466	1.07906	163	3.99577	2.50021			163	0.614634	0.552141	163	4.32286	3.89565			163	1.11466	1.30663	163	3.99577	3.11407			163	0.614634	0.757772	163	4.32286	1.43081
		164	1.13879	1.23572	164	7.18062	4.57041			164	0.788631	0.37858	164	3.71432	1.5919			164	1.13879	1.48022	164	7.18062	3.97054			164	0.788631	0.558933	164	3.71432	1.02044
		165	1.77927	1.5241	165	6.31936	5.54751			165	1.34969	0.786697	165	4.05354	1.84438			165	1.77927	1.41397	165	6.31936	4.70534			165	1.34969	0.887218	165	4.05354	1.53018
		166	0.788482	0.774133	166	9.65825	4.77179			166	1.29718	1.01957	166	6.26174	1.47974			166	0.788482	1.0568	166	9.65825	4.08665			166	1.29718	1.49227	166	6.26174	1.51663
		167	0.988148	0.688083	167	9.79287	8.97761			167	0.910841	0.999802	167	7.06685	2.47036			167	0.988148	0.893056	167	9.79287	4.83286			167	0.910841	0.947378	167	7.06685	1.79712
		168	1.08468	1.2702	168	10.9931	5.44376			168	0.89095	0.82768	168	11.3614	4.99716			168	1.08468	1.26035	168	10.9931	4.78878			168	0.89095	1.1602	168	11.3614	1.69095
		169	0.832413	0.798373	169	5.77221	5.19291			169	1.08663	1.01022	169	6.35223	4.04331			169	0.832413	1.07406	169	5.77221	3.37117			169	1.08663	0.717594	169	6.35223	1.64207
		170	0.784334	0.862484	170	13.2162	5.77951			170	1.31474	1.15654	170	7.62128	4.93973			170	0.784334	1.01829	170	13.2162	4.86673			170	1.31474	1.48185	170	7.62128	1.80624
		171	1.40558	1.02292	171	14.599	8.70315			171	0.963703	0.613615	171	6.5497	4.14138			171	1.40558	1.14873	171	14.599	5.0374			171	0.963703	0.555585	171	6.5497	1.68387
		172	1.00568	1.0015	172	6.82145	7.02004			172	1.13806	0.966563	172	6.36083	2.77835			172	1.00568	1.1722	172	6.82145	4.64044			172	1.13806	0.724669	172	6.36083	1.23116
		173	1.28567	0.742593	173	2.23762	1.22692			173	1.05814	1.03119	173	11.845	5.20944			173	1.28567	1.39692	173	2.23762	2.15169			173	1.05814	0.648902	173	11.845	2.00044
		174	1.07375	0.890215	174	11.2469	7.65254			174	1.17641	1.06912	174	3.72669	1.49023			174	1.07375	0.967513	174	11.2469	5.22368			174	1.17641	2.21829	174	3.72669	0.930691
		175	1.04565	0.995308	175	9.95068	8.98273			175	0.773399	0.764389	175	13.401	4.21708			175	1.04565	1.06786	175	9.95068	5.12491			175	0.773399	0.895211	175	13.401	1.59072
		176	0.970237	1.17721	176	12.4059	7.27593			176	0.569119	0.997643	176	4.13632	3.48418			176	0.970237	1.14717	176	12.4059	4.84199			176	0.569119	0.829381	176	4.13632	1.02417
		177	0.623697	0.0637143	177	13.8169	8.86164			177	1.53103	0.934387	177	7.20053	3.86207			177	0.623697	0.327283	177	13.8169	5.50482			177	1.53103	0.990418	177	7.20053	1.35732
		178	0.694211	0.509992	178	15.4406	7.81143			178	0.876973	0.721556	178	1.65826	0.790192			178	0.694211	0.760902	178	15.4406	5.83268			178	0.876973	0.511842	178	1.65826	0.864645
		179	0.974196	0.663803	179	13.6254	6.91058			179	1.02427	0.980784	179	6.11677	4.59377			179	0.974196	0.847626	179	13.6254	4.86488			179	1.02427	0.698153	179	6.11677	1.43254
		180	1.04584	1.00205	180	2.44313	1.17094			180	0.697242	0.550325	180	5.95585	3.93307			180	1.04584	0.963947	180	2.44313	2.04364			180	0.697242	0.416094	180	5.95585	1.35656
		181	1.06677	0.9623	181	8.62259	4.11037			181	0.849556	0.707712	181	1.21798	0.86133			181	1.06677	1.13247	181	8.62259	3.07456			181	0.849556	0.556989	181	1.21798	0.779806
		182	1.26116	1.07164	182	18.1157	5.90972			182	1.04757	1.27538	182	8.42604	3.42216			182	1.26116	1.21028	182	18.1157	6.37541			182	1.04757	0.585016	182	8.42604	1.39074
		183	1.25079	0.98658	183	10.1913	5.35954			183	1.04918	0.500843	183	7.51448	5.25546			183	1.25079	0.994115	183	10.1913	3.93445			183	1.04918	0.860919	183	7.51448	1.45825
		184	0.879171	1.03748	184	9.68728	3.28379			184	0.795619	0.485218	184	4.85399	2.72075			184	0.879171	0.950325	184	9.68728	3.44185			184	0.795619	0.942571	184	4.85399	1.07099
		185	1.01247	0.879662	185	15.3072	7.51384			185	1.30901	1.60728	185	7.92483	4.87212			185	1.01247	1.18211	185	15.3072	5.25892			185	1.30901	2.68606	185	7.92483	1.59941
		186	0.785654	0.614411	186	11.3766	7.27232			186	1.05724	0.924141	186	9.64061	4.6769			186	0.785654	0.906036	186	11.3766	4.5443			186	1.05724	0.790282	186	9.64061	1.48347
		187	0.842217	0.587671	187	5.56764	3.59922			187	0.694016	0.335917	187	6.20404	3.10714			187	0.842217	0.966015	187	5.56764	2.99112			187	0.694016	0.392387	187	6.20404	1.20665
		188	1.0713	1.03288	188	9.20348	5.55509			188	1.18519	1.09993	188	0.187078	0.00400921			188	1.0713	1.07164	188	9.20348	4.03052			188	1.18519	0.945488	188	0.187078	0.0117727
		189	0.992296	0.732675	189	3.93487	2.54825			189	0.802249	0.636677	189	6.10817	3.39875			189	0.992296	1.06151	189	3.93487	2.58845			189	0.802249	0.589229	189	6.10817	1.25881
		190	1.11749	0.859508	190	6.13987	3.87154			190	1.01818	0.970641	190	7.30411	3.73816			190	1.11749	1.08697	190	6.13987	3.49334			190	1.01818	1.11733	190	7.30411	1.44626
		191	0.755299	0.573865	191	20.6544	5.99355			191	0.67771	0.697089	191	11.3277	4.18343			191	0.755299	0.752129	191	20.6544	5.9475			191	0.67771	0.988474	191	11.3277	1.48028
		192	1.45045	1.16618	192	17.8736	7.41284			192	1.14075	1.22326	192	13.8724	5.27003			192	1.45045	1.45769	192	17.8736	5.52522			192	1.14075	1.40084	192	13.8724	1.72438
		193	0.747192	0.787502	193	14.2458	7.31782			193	0.774116	0.745954	193	5.04251	3.55724			193	0.747192	1.26284	193	14.2458	5.32988			193	0.774116	0.62109	193	5.04251	1.41769
		194	0.728714	0.722003	194	6.18097	1.20716			194	1.11064	0.884597	194	3.89172	3.3027			194	0.728714	0.943407	194	6.18097	2.59009			194	1.11064	1.44945	194	3.89172	1.2013
		195	1.41595	0.722955	195	11.3883	6.30311			195	0.893459	0.795366	195	8.98279	5.16435			195	1.41595	0.947472	195	11.3883	4.80711			195	0.893459	0.581182	195	8.98279	1.60503
		196	0.837315	0.52963	196	4.15509	0.776156			196	0.221842	0.0124046	196	7.22437	4.6206			196	0.837315	0.781656	196	4.15509	1.52587			196	0.221842	0.051087	196	7.22437	1.43535
		197	1.26983	1.14083	197	10.4548	6.87801			197	0.966032	0.95738	197	6.04545	3.34255			197	1.26983	1.26591	197	10.4548	4.62125			197	0.966032	0.727099	197	6.04545	1.45765
		198	1.17009	1.02403	198	17.4233	8.42525			198	0.88647	0.859685	198	14.5052	2.37887			198	1.17009	1.21592	198	17.4233	6.62881			198	0.88647	0.570165	198	14.5052	2.13518
		199	1.57074	1.10699	199	17.5927	8.85772			199	0.0641513	0.00346095	199	0.972842	0.73139			199	1.57074	1.11286	199	17.5927	6.36008			199	0.0641513	0.0125827	199	0.972842	0.874581
		200	0.972122	0.718472	200	12.5752	8.13341			200	0.290293	0.0650726	200	6.07197	3.2292			200	0.972122	1.12113	200	12.5752	6.22186			200	0.290293	0.0800327	200	6.07197	1.32313
		201	0.845045	0.622226	201	9.80927	5.72988			201	0.841851	0.692361	201	7.39281	5.2936			201	0.845045	0.801197	201	9.80927	4.26074			201	0.841851	0.55121	201	7.39281	1.6141
		202	0.984754	0.717956	202	6.03164	2.94621			202	0.695629	0.63044	202	5.2794	4.44063			202	0.984754	0.858894	202	6.03164	2.6045			202	0.695629	0.568491	202	5.2794	1.48158
		203	1.1633	0.817654	203	4.30158	0.403788			203	0.986639	0.775629	203	6.59898	2.48397			203	1.1633	1.25785	203	4.30158	1.29636			203	0.986639	0.571678	203	6.59898	1.45198
		204	0.658577	0.596994	204	10.5465	5.42381			204	0.794723	0.90759	204	10.9892	6.36787			204	0.658577	0.874727	204	10.5465	4.66483			204	0.794723	3.20979	204	10.9892	1.93277
		205	0.83656	0.638373	205	17.4009	8.21669			205	1.0809	0.891862	205	7.4084	2.8143			205	0.83656	1.00182	205	17.4009	5.88374			205	1.0809	0.798653	205	7.4084	1.55961
		206	1.03378	0.888906	206	8.32488	3.96596			206	0.985027	1.05504	206	6.81724	5.29323			206	1.03378	1.03648	206	8.32488	3.88239			206	0.985027	1.90993	206	6.81724	1.76337
		207	0.860694	0.88109	207	11.5595	6.03814			207	0.515002	0.587504	207	15.9034	2.66938			207	0.860694	1.08134	207	11.5595	4.75954			207	0.515002	0.836023	207	15.9034	1.87758
		208	1.30923	1.07132	208	12.8357	7.68237			208	0.863175	0.862187	208	6.1191	5.37639			208	1.30923	1.30685	208	12.8357	4.6475			208	0.863175	0.930421	208	6.1191	1.61437
		209	0.679316	0.643887	209	15.7553	7.9654			209	0.623235	0.529833	209	4.62283	1.9614			209	0.679316	0.817244	209	15.7553	4.84691			209	0.623235	0.644258	209	4.62283	1.06521
		210	1.56641	1.48753	210	11.6223	5.30602			210	0.610691	0.756851	210	2.65995	1.58823			210	1.56641	1.48108	210	11.6223	4.94861			210	0.610691	0.823818	210	2.65995	0.936037
		211	1.2127	1.1444	211	9.8236	6.89785			211	0.995958	1.01618	211	6.90146	4.95803			211	1.2127	1.25635	211	9.8236	4.10262			211	0.995958	0.775702	211	6.90146	1.50042
		212	0.635009	0.568351	212	13.838	7.80742			212	1.25418	1.28045	212	10.4124	5.07902			212	0.635009	0.744926	212	13.838	4.87479			212	1.25418	1.60892	212	10.4124	1.60146
		213	0.951571	0.609174	213	12.0769	6.20865			213	1.02445	1.30502	213	5.91572	3.30616			213	0.951571	0.92358	213	12.0769	4.23613			213	1.02445	1.79744	213	5.91572	1.26999
		214	0.976836	0.961308	214	13.4762	6.45383			214	0.597969	0.869623	214	8.64591	3.33169			214	0.976836	1.11094	214	13.4762	4.70698			214	0.597969	1.43216	214	8.64591	2.10143
		215	1.26361	1.22247	215	14.2457	8.07442			215	0.740428	0.856156	215	8.98261	3.86653			215	1.26361	1.41518	215	14.2457	5.16791			215	0.740428	0.946892	215	8.98261	1.45188
		216	0.966089	0.694906	216	12.4485	6.94954			216	0.569477	0.604569	216	7.99526	3.62066			216	0.966089	0.964161	216	12.4485	4.68993			216	0.569477	0.654086	216	7.99526	1.25023
		217	0.925929	0.559266	217	9.76327	5.99034			217	1.09451	0.813117	217	1.29234	0.489056			217	0.925929	0.803479	217	9.76327	4.42199			217	1.09451	0.685678	217	1.29234	0.753776
		218	1.35467	0.440724	218	5.71546	3.58804			218	0.91765	0.882267	218	5.49551	0.858177			218	1.35467	0.790214	218	5.71546	2.87373			218	0.91765	0.715326	218	5.49551	1.45042
		219	1.18122	1.08842	219	9.42182	5.64126			219	1.22998	1.19087	219	5.59137	1.91051			219	1.18122	1.17106	219	9.42182	5.03148			219	1.22998	1.56226	219	5.59137	2.59836
		220	1.28171	1.1373	220	16.4586	7.49417			220	1.26618	1.19756	220	8.02429	4.6363			220	1.28171	1.14838	220	16.4586	4.97828			220	1.26618	1.45906	220	8.02429	2.43165
		221	0.884073	0.723034	221	15.5357	7.81849			221	0.794006	0.481757	221	11.1817	4.67341			221	0.884073	1.06479	221	15.5357	4.81688			221	0.794006	0.560175	221	11.1817	1.58505
		222	1.1486	1.02756	222	11.9094	7.25506			222	0.638108	0.550941	222	9.18815	4.23442			222	1.1486	1.20237	222	11.9094	4.53168			222	0.638108	0.552182	222	9.18815	1.50258
		223	1.45347	1.22339	223	12.8959	7.41268			223	0.623414	0.573112	223	9.48507	5.27489			223	1.45347	1.22619	223	12.8959	4.43475			223	0.623414	0.851144	223	9.48507	1.60983
		224	1.32356	1.08894	224	9.66994	7.02087			224	1.19558	0.765897	224	7.24927	6.03058			224	1.32356	1.15558	224	9.66994	4.13222			224	1.19558	0.816906	224	7.24927	1.80624
		225	1.4003	0.841378	225	12.4021	6.31458			225	1.03861	0.829222	225	6.95665	3.51276			225	1.4003	1.25999	225	12.4021	4.78757			225	1.03861	1.181	225	6.95665	1.3564
		226	1.00248	0.803689	226	11.7669	4.48452			226	1.46294	1.65831	226	13.818	5.30484			226	1.00248	0.974787	226	11.7669	4.39025			226	1.46294	1.9912	226	13.818	1.91582
		227	0.706844	0.680228	227	10.7316	6.13796			227	1.11763	1.11463	227	13.4257	6.26448			227	0.706844	1.10052	227	10.7316	4.9623			227	1.11763	0.741896	227	13.4257	2.10758
		228	0.946669	0.767388	228	2.67296	1.2842			228	0.629686	0.545185	228	9.39314	4.92732			228	0.946669	1.04168	228	2.67296	1.90992			228	0.629686	0.835267	228	9.39314	1.67664
		229	1.04471	1.05256	229	2.25308	1.28325			229	0.747954	0.896111	229	3.28283	1.9896			229	1.04471	1.10537	229	2.25308	2.22394			229	0.747954	0.588149	229	3.28283	1.26303
		230	1.14143	1.05125	230	9.47951	4.41644			230	0.692404	0.801192	230	8.34307	4.37745			230	1.14143	1.15651	230	9.47951	4.06097			230	0.692404	0.766521	230	8.34307	1.5939
		231	1.11994	0.998482	231	1.66445	0.699032			231	0.736485	0.782859	231	11.8239	6.87762			231	1.11994	1.09945	231	1.66445	1.27718			231	0.736485	2.07102	231	11.8239	1.92235
		232	1.00889	0.96956	232	4.55857	2.32609			232	1.11817	0.974924	232	3.10542	0.226229			232	1.00889	1.02207	232	4.55857	2.34454			232	1.11817	0.851522	232	3.10542	0.514866
		233	1.09486	1.17237	233	9.0568	6.1977			233	0.925176	0.904164	233	2.43058	1.17007			233	1.09486	1.14203	233	9.0568	4.61933			233	0.925176	0.658407	233	2.43058	1.01148
		234	0.868424	0.743585	234	10.5023	4.80202			234	1.24181	1.35563	234	6.8029	4.50485			234	0.868424	0.985842	234	10.5023	4.24776			234	1.24181	0.839047	234	6.8029	1.64963
		235	0.560347	0.624964	235	7.78094	3.40169			235	1.37549	1.48769	235	6.61367	6.53108			235	0.560347	1.07043	235	7.78094	3.81891			235	1.37549	0.846122	235	6.61367	1.85209
		236	0.827888	0.581324	236	5.46658	2.73353			236	0.980188	0.97256	236	9.24334	5.64833			236	0.827888	0.886851	236	5.46658	2.45544			236	0.980188	0.857354	236	9.24334	1.62155
		237	1.1222	1.14162	237	13.9493	6.50981			237	0.892563	0.868183	237	6.95127	4.38358			237	1.1222	1.17206	237	13.9493	4.59872			237	0.892563	0.750266	237	6.95127	1.71768
		238	0.95044	0.987453	238	12.7211	6.82529			238	0.617322	0.817434	238	13.2207	4.87541			238	0.95044	1.10666	238	12.7211	4.89326			238	0.617322	0.511626	238	13.2207	1.69489
		239	1.58997	1.45523	239	12.2134	6.64454			239	1.24808	1.31845	239	6.56422	5.10537			239	1.58997	1.18104	239	12.2134	4.62211			239	1.24808	1.25514	239	6.56422	1.47364
		240	2.01476	1.37275	240	3.03854	0.977098			240	1.49394	1.19961	240	7.38528	3.73285			240	2.01476	1.34322	240	3.03854	1.73704			240	1.49394	0.74465	240	7.38528	1.52861
		241	0.862202	0.783496	241	19.3927	9.34283			241	1.29127	1.39301	241	9.82626	3.71044			241	0.862202	1.03569	241	19.3927	6.27214			241	1.29127	0.787258	241	9.82626	1.37643
		242	1.50174	1.28936	242	13.512	5.01931			242	1.37997	1.16778	242	5.03283	3.78508			242	1.50174	1.17213	242	13.512	4.8765			242	1.37997	0.78283	242	5.03283	1.37146
		243	1.48797	1.38037	243	9.41691	4.74037			243	0.828232	0.955598	243	11.5944	4.97129			243	1.48797	1.31148	243	9.41691	3.99757			243	0.828232	0.717	243	11.5944	1.69948
		244	0.59617	0.588465	244	7.83938	7.41276			244	1.09093	1.14941	244	7.13065	4.30994			244	0.59617	0.921655	244	7.83938	4.25917			244	1.09093	0.697127	244	7.13065	1.41153
		245	0.798286	0.741601	245	10.4315	5.38914			245	0.417879	0.297778	245	8.17947	4.06079			245	0.798286	1.08519	245	10.4315	4.34083			245	0.417879	0.437102	245	8.17947	1.39636
		246	0.922913	0.837212	246	8.72591	5.19355			246	0.883782	0.817366	246	7.60909	5.23621			246	0.922913	0.945119	246	8.72591	4.09342			246	0.883782	0.768573	246	7.60909	1.59353
		247	1.71403	1.30805	247	10.6415	5.6743			247	0.572882	0.526886	247	11.3845	5.63815			247	1.71403	1.25236	247	10.6415	4.50022			247	0.572882	0.529123	247	11.3845	1.84669
		248	1.06752	0.938021	248	14.3575	5.82026			248	1.0171	0.788719	248	1.12749	0.70175			248	1.06752	1.04882	248	14.3575	5.25884			248	1.0171	0.654032	248	1.12749	1.00343
		249	0.980795	0.823565	249	10.0998	6.50291			249	1.32962	1.60543	249	1.45236	0.638116			249	0.980795	0.937487	249	10.0998	4.52932			249	1.32962	1.31103	249	1.45236	0.589499
		250	0.538476	0.537565	250	10.2693	3.07039			250	0.918188	0.964336	250	17.2614	2.61068			250	0.538476	0.967227	250	10.2693	3.6511			250	0.918188	0.68449	250	17.2614	2.70637
		251	0.871818	0.801547	251	15.9346	3.82441			251	1.30112	1.25612	251	7.45176	5.45675			251	0.871818	0.912098	251	15.9346	5.0205			251	1.30112	0.832945	251	7.45176	1.50852
		252	1.22986	1.22458	252	8.20233	7.80179			252	1.0662	1.1465	252	4.8384	4.14464			252	1.22986	1.09853	252	8.20233	4.08551			252	1.0662	0.701663	252	4.8384	1.27388
		253	0.847119	0.821661	253	9.74234	6.77931			253	0.501383	0.439883	253	5.88203	4.97026			253	0.847119	0.975358	253	9.74234	4.29376			253	0.501383	0.516648	253	5.88203	1.544
		254	1.02265	0.806664	254	1.64541	1.29012			254	0.744728	0.903273	254	7.42255	2.26815			254	1.02265	1.08619	254	1.64541	1.60204			254	0.744728	2.83387	254	7.42255	2.06762
		255	1.26248	0.995427	255	9.66805	7.8415			255	1.09398	0.8492	255	11.1974	4.22599			255	1.26248	1.02179	255	9.66805	3.95235			255	1.09398	0.670503	255	11.1974	1.97895
		256	1.00908	0.848083	256	10.0372	7.35258			256	1.35004	1.0499	256	8.99444	6.73366			256	1.00908	1.06957	256	10.0372	4.24747			256	1.35004	0.833647	256	8.99444	1.63316
		257	0.915182	0.481229	257	24.7661	9.26333			257	0.871239	0.928356	257	0.246929	0.00911497			257	0.915182	0.939056	257	24.7661	7.64732			257	0.871239	0.713598	257	0.246929	0.0140408
		258	1.10429	0.898626	258	12.4306	7.79143			258	0.868909	0.563483	258	9.5227	3.50587			258	1.10429	1.10509	258	12.4306	4.9556			258	0.868909	0.64577	258	9.5227	1.52721
		259	0.901796	0.889263	259	8.13898	7.97936			259	0.791498	0.774224	259	11.5533	7.06646			259	0.901796	0.982062	259	8.13898	5.20685			259	0.791498	0.602567	259	11.5533	1.68268
		260	0.983435	0.71272	260	21.2072	9.20442			260	0.751896	1.02704	260	5.59388	3.98838			260	0.983435	0.989764	260	21.2072	7.41489			260	0.751896	0.781048	260	5.59388	1.37173
		261	0.510006	0.465678	261	11.4026	7.75565			261	1.13214	0.967728	261	8.67386	4.73714			261	0.510006	0.936418	261	11.4026	4.89048			261	1.13214	1.47785	261	8.67386	1.63489
		262	0.730788	0.542603	262	18.3928	9.18351			262	0.860666	0.916294	262	12.9919	7.76019			262	0.730788	0.778018	262	18.3928	6.03929			262	0.860666	0.726181	262	12.9919	2.48965
		263	0.747757	0.653964	263	15.5549	7.00838			263	0.89991	1.13855	263	0.575032	0.0126444			263	0.747757	0.892485	263	15.5549	5.1575			263	0.89991	0.619686	263	0.575032	0.0392603
		264	0.758693	0.882439	264	10.3242	3.72249			264	1.08448	1.20975	264	9.57628	4.60919			264	0.758693	0.809827	264	10.3242	3.4865			264	1.08448	0.747404	264	9.57628	1.46986
		265	0.86635	0.976463	265	18.2707	9.78975			265	0.898297	1.16894	265	11.2397	5.20674			265	0.86635	0.962663	265	18.2707	7.06471			265	0.898297	1.79096	265	11.2397	1.77109
		266	0.728149	0.630716	266	11.5529	6.76526			266	0.937003	1.01985	266	8.34289	2.9968			266	0.728149	0.708054	266	11.5529	5.23887			266	0.937003	0.665373	266	8.34289	1.36947
		267	0.934979	0.820629	267	16.1188	8.27096			267	0.746341	0.777513	267	14.0348	5.64943			267	0.934979	0.906749	267	16.1188	5.26669			267	0.746341	0.479278	267	14.0348	1.71833
		268	0.841651	0.910845	268	12.2388	7.73962			268	0.632732	0.786354	268	8.62261	5.23394			268	0.841651	0.906321	268	12.2388	5.4534			268	0.632732	0.945542	268	8.62261	1.55254
		269	0.652732	0.808489	269	13.3503	6.64553			269	0.709965	4.08323	269	13.542	5.24947			269	0.652732	0.905679	269	13.3503	5.25835			269	0.709965	0.713598	269	13.542	1.74387
		270	1.4448	1.30868	270	1.72459	1.37089			270	0.681115	3.99842	270	8.19936	5.3952			270	1.4448	1.31954	270	1.72459	2.23043			270	0.681115	0.711708	270	8.19936	1.63705
		271	1.44913	1.45234	271	2.6722	1.26639			271	1.33427	1.17504	271	9.70655	4.30264			271	1.44913	1.33466	271	2.6722	2.01326			271	1.33427	0.962283	271	9.70655	1.69667
		272	1.49099	1.60837	272	15.672	7.8761			272	0.970512	2.58094	272	12.8448	5.20465			272	1.49099	1.30613	272	15.672	5.48493			272	0.970512	0.799733	272	12.8448	1.75175
		273	1.62636	1.49975	273	11.5491	8.15595			273	1.15042	4.33502	273	8.50596	6.17936			273	1.62636	1.50283	273	11.5491	4.94547			273	1.15042	0.822792	273	8.50596	1.5123
		274	1.43537	0.953771	274	11.9356	7.38316			274	1.21063	1.29895	274	9.18618	4.82384			274	1.43537	1.14624	274	11.9356	5.45326			274	1.21063	1.13385	274	9.18618	1.7827
		275	1.23797	1.28964	275	7.80922	4.76262			275	1.29467	1.63925	275	12.0853	6.30043			275	1.23797	1.44549	275	7.80922	4.13536			275	1.29467	2.99977	275	12.0853	1.60325
		276	1.53379	1.62245	276	11.5767	6.97211			276	0.998825	0.227737	276	8.34128	4.11633			276	1.53379	1.50996	276	11.5767	5.37003			276	0.998825	0.369274	276	8.34128	1.39987
		277	1.22967	1.03296	277	0.242088	0.0046417			277	1.62367	1.34597	277	0.118447	0.00627082			277	1.22967	1.12199	277	0.242088	0.00656134			277	1.62367	0.947864	277	0.118447	0.00642638
		278	0.875589	0.849392	278	11.8446	7.60132			278	0.86658	1.00546	278	6.22429	3.12839			278	0.875589	1.08526	278	11.8446	4.62004			278	0.86658	1.05009	278	6.22429	1.63025
		279	1.02359	0.539985	279	13.0347	5.7469			279	0.956714	0.887921	279	8.40901	4.46952			279	1.02359	0.813107	279	13.0347	4.89141			279	0.956714	0.606888	279	8.40901	1.62809
		280	0.0365771	0.00404661	280	17.7499	8.9853			280	1.14791	1.36351	280	5.67613	4.98016			280	0.0365771	0.0151196	280	17.7499	5.7028			280	1.14791	1.0846	280	5.67613	1.50334
		281	0.808845	0.701492	281	15.7033	5.03506			281	1.18734	1.21452	281	8.05923	4.43854			281	0.808845	0.829511	281	15.7033	4.62617			281	1.18734	0.847094	281	8.05923	1.54017
		282	0.844856	0.666025	282	20.7935	8.47234			282	1.3952	1.76313	282	0.087984	0.00537989			282	0.844856	0.877865	282	20.7935	5.91526			282	1.3952	1.77109	282	0.087984	0.00869451
		283	1.12522	0.919493	283	13.6663	7.93334			283	1.16207	1.40079	283	13.9997	4.7014			283	1.12522	1.02521	283	13.6663	5.09524			283	1.16207	1.42061	283	13.9997	1.81067
		284	1.3641	1.03462	284	19.5701	6.95323			284	1.69087	1.33503	284	4.80776	5.78852			284	1.3641	1.15729	284	19.5701	5.98473			284	1.69087	0.763119	284	4.80776	1.42973
		285	1.41538	1.33721	285	11.1683	6.57027			285	0.913708	0.815515	285	8.29756	5.01923			285	1.41538	1.45455	285	11.1683	4.82687			285	0.913708	0.772083	285	8.29756	1.61448
		286	0.915182	0.964601	286	18.9404	6.13617			286	1.46347	1.34411	286	0.138875	0.012713			286	0.915182	1.06622	286	18.9404	6.22693			286	1.46347	0.933553	286	0.138875	0.0147969
		287	1.18593	1.06977	287	23.9493	8.89243			287	1.20436	1.57065	287	7.14857	2.00228			287	1.18593	1.16514	287	23.9493	6.85239			287	1.20436	1.81478	287	7.14857	2.42015
		288	1.53812	1.24406	288	13.1974	8.00107			288	0.757093	0.813562	288	6.78427	3.35753			288	1.53812	1.2443	288	13.1974	5.03148			288	0.757093	0.81048	288	6.78427	1.36299
		289	0.920273	0.96599	289	12.8753	8.43548			289	1.26564	1.54605	289	5.05827	2.21292			289	0.920273	1.19944	289	12.8753	4.94732			289	1.26564	2.1658	289	5.05827	1.34554
		290	1.22873	1.12726	290	11.7279	8.03483			290	1.17175	1.14821	290	7.74761	4.21588			290	1.22873	1.43365	290	11.7279	4.64693			290	1.17175	0.844718	290	7.74761	1.42293
		291	1.02095	1.02514	291	13.8705	6.54369			291	0.564818	0.706478	291	9.47414	3.67456			291	1.02095	1.12178	291	13.8705	4.75676			291	0.564818	0.479116	291	9.47414	1.75111
		292	1.26097	0.936711	292	11.2262	7.71015			292	1.83279	1.79877	292	8.35669	3.70945			292	1.26097	0.934278	292	11.2262	4.65663			292	1.83279	0.876309	292	8.35669	1.52899
		293	0.774342	0.89323	293	13.223	9.32629			293	1.01137	0.948368	293	5.98005	2.33048			293	0.774342	1.09874	293	13.223	5.25571			293	1.01137	0.601271	293	5.98005	1.48152
		294	0.935356	0.973607	294	2.94691	2.14808			294	1.60611	1.36502	294	11.0383	4.38618			294	0.935356	1.20058	294	2.94691	2.554			294	1.60611	1.14454	294	11.0383	2.25566
		295	1.32413	1.00058	295	11.7537	4.6765			295	1.16028	1.06556	295	3.05776	0.502934			295	1.32413	1.17391	295	11.7537	4.14869			295	1.16028	1.22506	295	3.05776	0.762255
		296	0.980984	0.919652	296	12.4164	7.26736			296	0.849736	1.00477	296	3.89101	1.71471			296	0.980984	0.991618	296	12.4164	4.59444			296	0.849736	0.729151	296	3.89101	1.47121
		297	1.30697	1.19443	297	12.7196	6.61693			297	0.735948	0.683108	297	2.8085	0.773093			297	1.30697	1.14517	297	12.7196	4.87893			297	0.735948	0.844178	297	2.8085	1.07796
		298	0.880302	0.826778	298	15.3899	7.60462			298	1.39538	1.45277	298	8.08342	3.16735			298	0.880302	1.09567	298	15.3899	5.39385			298	1.39538	1.0144	298	8.08342	1.65071
		299	1.31451	1.15416	299	6.97982	3.02377			299	1.01531	1.12237	299	12.8161	5.11942			299	1.31451	1.26142	299	6.97982	3.07862			299	1.01531	1.0502	299	12.8161	2.07561
		300	1.15029	0.963689	300	11.2384	7.93045			300	1.13877	1.27353	300	9.31663	5.60731			300	1.15029	1.14431	300	11.2384	4.67004			300	1.13877	0.867507	300	9.31663	1.50015
		301	0.823928	0.768539	301	12.3757	7.26347			301	1.14899	1.10456	301	6.19562	3.75509			301	0.823928	1.01102	301	12.3757	4.8151			301	1.14899	0.636481	301	6.19562	1.27496
		302	1.26926	0.93572	302	17.8726	5.93543			302	1.15992	1.23073	302	2.69435	2.24931			302	1.26926	1.23346	302	17.8726	5.31333			302	1.15992	1.21221	302	2.69435	1.19547
		303	1.0515	0.921001	303	8.39313	6.96283			303	0.988073	0.994799	303	8.55774	4.40215			303	1.0515	1.06579	303	8.39313	4.68829			303	0.988073	1.07655	303	8.55774	1.94708
		304	1.22665	1.03236	304	14.5273	6.491			304	0.705664	0.729746	304	8.32085	4.77929			304	1.22665	1.02778	304	14.5273	4.80055			304	0.705664	0.604998	304	8.32085	1.40781
		305	0.627845	0.561448	305	7.21079	4.6663			305	1.59643	1.63117	305	10.0476	3.22337			305	0.627845	0.683164	305	7.21079	3.87975			305	1.59643	0.834835	305	10.0476	1.31617
		306	1.44725	1.27754	306	9.92956	6.43487			306	1.45451	1.30426	306	6.93909	4.01271			306	1.44725	1.28374	306	9.92956	4.66847			306	1.45451	0.753236	306	6.93909	1.9203
		307	1.20026	1.19109	307	17.1513	7.3838			307	1.37388	1.30772	307	2.98841	0.661212			307	1.20026	1.20287	307	17.1513	5.54961			307	1.37388	0.739195	307	2.98841	0.689782
		308	0.795647	0.916042	308	18.0338	7.2718			308	0.924459	1.10017	308	9.05375	3.78614			308	0.795647	1.34807	308	18.0338	5.39314			308	0.924459	0.889324	308	9.05375	1.15815
		309	1.28322	0.923976	309	13.1306	7.53376			309	0.975171	1.31506	309	12.9688	6.44264			309	1.28322	1.02464	309	13.1306	5.60802			309	0.975171	0.690809	309	12.9688	1.92791
		310	1.64465	1.28603	310	9.21819	6.60427			310	1.0585	1.05065	310	12.2072	5.21722			310	1.64465	1.23888	310	9.21819	4.44524			310	1.0585	0.723967	310	12.2072	1.98726
		311	1.05847	1.02518	311	3.19824	0.273226			311	1.52332	1.52748	311	6.77262	5.28322			311	1.05847	1.18611	311	3.19824	0.705701			311	1.52332	1.07963	311	6.77262	1.56685
		312	1.08619	0.629129	312	7.37614	5.18379			312	1.27675	1.02746	312	6.0166	4.32896			312	1.08619	0.950467	312	7.37614	4.31822			312	1.27675	0.874527	312	6.0166	1.37195
		313	1.28699	0.852407	313	9.71877	5.28031			313	1.61418	1.53872	313	7.43599	5.63264			313	1.28699	1.21699	313	9.71877	4.7661			313	1.61418	1.30644	313	7.43599	1.4252
		314	1.54529	1.4304	314	0.829019	0.0606992			314	0.926789	1.23244	314	9.5098	4.34681			314	1.54529	1.48372	314	0.829019	0.159327			314	0.926789	0.771921	314	9.5098	1.59288
		315	1.37994	1.31555	315	3.0574	3.28506			315	0.661582	0.885488	315	1.73603	0.0915609			315	1.37994	1.34786	315	3.0574	2.74307			315	0.661582	1.03935	315	1.73603	0.189443
		316	1.34355	1.11956	316	6.42739	8.9688			316	1.21386	1.32277	316	8.89104	4.50159			316	1.34355	1.11436	316	6.42739	5.49156			316	1.21386	1.11776	316	8.89104	1.60109
		317	0.802811	0.805117	317	10.308	4.17404			317	1.32693	1.51171	317	5.93148	3.5032			317	0.802811	1.13654	317	10.308	4.35516			317	1.32693	1.08762	317	5.93148	1.41116
		318	1.3377	1.18689	318	11.1095	7.30981			318	0.521811	0.369876	318	3.42618	1.53166			318	1.3377	1.38259	318	11.1095	4.82465			318	0.521811	1.20114	318	3.42618	1.06791
		319	1.08317	1.00947	319	16.8306	6.96478			319	0.591697	0.691195	319	8.95591	4.31703			319	1.08317	1.23967	319	16.8306	5.64917			319	0.591697	0.491213	319	8.95591	1.46916
		320	1.32583	1.27552	320	17.834	7.21955			320	1.13591	1.0865	320	8.41994	4.73218			320	1.32583	1.30442	320	17.834	5.54148			320	1.13591	0.807509	320	8.41994	1.75613
		321	1.12899	1.04042	321	12.456	7.68646			321	0.732005	0.627836	321	2.19978	0.196726			321	1.12899	1.27026	321	12.456	5.12826			321	0.732005	0.57346	321	2.19978	0.395843
		322	0.603146	0.596637	322	9.29097	5.66899			322	0.0707814	0.0925546	322	4.2347	4.78937			322	0.603146	0.748064	322	9.29097	3.84495			322	0.0707814	0.17389	322	4.2347	1.70947
		323	1.45045	1.29849	323	1.64691	0.789565			323	0.625923	0.48114	323	4.84378	2.34656			323	1.45045	1.46083	323	1.64691	1.39607			323	0.625923	0.669801	323	4.84378	1.50944
		324	1.21779	1.05188	324	1.20214	0.18178			324	1.04739	0.907248	324	11.7968	4.27482			324	1.21779	1.21199	324	1.20214	0.316371			324	1.04739	0.864321	324	11.7968	1.64801
		325	0.939881	0.809045	325	8.34996	4.18344			325	0.622877	0.63188	325	13.4031	6.01019			325	0.939881	0.985556	325	8.34996	3.29044			325	0.622877	0.627085	325	13.4031	2.05595
		326	1.28567	1.28365	326	7.63406	5.95971			326	0.774654	0.647231	326	12.9989	5.33657			326	1.28567	1.49263	326	7.63406	3.49591			326	0.774654	0.573622	326	12.9989	2.48474
		327	0.933471	0.905092	327	16.3208	7.69963			327	0.913708	1.06326	327	12.3902	3.44069			327	0.933471	0.977283	327	16.3208	4.86067			327	0.913708	1.08671	327	12.3902	2.21845
		328	0.896517	0.871291	328	9.27871	5.15483			328	1.26887	1.27263	328	3.05507	0.622765			328	0.896517	1.26541	328	9.27871	3.69924			328	1.26887	1.64072	328	3.05507	0.88657
		329	1.37051	1.0182	329	8.75645	6.1662			329	0.757809	0.716519	329	7.35804	4.98688			329	1.37051	1.13896	329	8.75645	4.52055			329	0.757809	0.961742	329	7.35804	1.47353
		330	1.38295	1.47408	330	6.85218	5.84537			330	0.903135	0.713846	330	9.76891	5.23408			330	1.38295	1.48614	330	6.85218	3.83197			330	0.903135	0.654734	330	9.76891	1.87683
		331	1.19781	0.915129	331	17.4663	2.73368			331	0.857441	0.416513	331	10.3671	6.16408			331	1.19781	1.01473	331	17.4663	5.06108			331	0.857441	0.609156	331	10.3671	2.03479
		332	1.21327	1.13496	332	6.79373	6.13693			332	0.614813	0.780152	332	9.34422	4.50886			332	1.21327	1.29294	332	6.79373	4.63637			332	0.614813	0.85325	332	9.34422	1.65439
		333	2.70822	0.489521	333	10.4054	6.08618			333	0.834504	1.02684	333	1.10813	0.170135			333	2.70822	1.02792	333	10.4054	4.07538			333	0.834504	1.05501	333	1.10813	0.172378
		334	1.30169	1.09635	334	5.25108	4.81606			334	0.817481	1.30975	334	9.95796	2.83294			334	1.30169	1.22077	334	5.25108	3.47673			334	0.817481	4.75125	334	9.95796	2.03225
		335	1.51286	1.15606	335	9.31774	6.74051			335	0.912453	0.871576	335	14.4041	5.55468			335	1.51286	1.2662	335	9.31774	4.36543			335	0.912453	1.1366	335	14.4041	2.08431
		336	1.11523	1.07957	336	11.1998	6.00251			336	0.578974	0.858931	336	10.9561	4.4062			336	1.11523	1.11521	336	11.1998	3.91177			336	0.578974	0.569247	336	10.9561	1.8192
		337	1.43443	1.18022	337	3.96296	1.39124			337	0.789347	0.853517	337	7.01435	5.19957			337	1.43443	1.19866	337	3.96296	2.1216			337	0.789347	0.831703	337	7.01435	1.48066
		338	1.05678	1.13611	338	9.05944	5.70009			338	0.603882	0.914032	338	5.1717	4.3744			338	1.05678	1.27212	338	9.05944	4.05099			338	0.603882	0.521347	338	5.1717	1.32718
		339	1.14973	1.15686	339	4.59213	5.42825			339	0.916575	1.02807	339	11.4127	5.80462			339	1.14973	1.22711	339	4.59213	3.85429			339	0.916575	1.2	339	11.4127	1.96809
		340	0.452312	0.0868832	340	10.4643	6.69564			340	0.290473	0.280097	340	5.14429	0.424291			340	0.452312	0.277787	340	10.4643	4.30716			340	0.290473	0.749564	340	5.14429	0.570868
		341	0.147063	0.0128143	341	11.2756	5.19585			341	1.09362	0.597579	341	8.89857	5.64199			341	0.147063	0.0608351	341	11.2756	4.26009			341	1.09362	0.765279	341	8.89857	1.66999
		342	1.19969	1.16951	342	4.08042	2.02803			342	0.969078	1.14578	342	8.51689	5.67568			342	1.19969	1.17377	342	4.08042	2.63431			342	0.969078	0.833215	342	8.51689	1.65698
		343	1.65351	1.37859	343	11.2735	4.25846			343	0.594564	0.60964	343	8.75755	5.06597			343	1.65351	1.25493	343	11.2735	4.16281			343	0.594564	0.736009	343	8.75755	1.43432
		344	1.4463	1.23223	344	12.1483	7.17294			344	1.05796	1.04133	344	6.59988	3.75619			344	1.4463	1.2239	344	12.1483	4.54352			344	1.05796	0.943111	344	6.59988	1.9554
		345	1.56678	1.16535	345	1.2423	0.134133			345	1.36187	1.38195	345	5.75283	2.72233			345	1.56678	1.36412	345	1.2423	0.3996			345	1.36187	1.01985	345	5.75283	2.04051
		346	1.142	1.08814	346	4.60928	1.55172			346	0.934853	1.03736	346	3.71253	3.03957			346	1.142	1.08191	346	4.60928	2.42705			346	0.934853	1.26303	346	3.71253	1.32594
		347	1.06715	0.962816	347	8.98704	5.91456			347	0.842209	0.895939	347	14.0835	6.57052			347	1.06715	1.14831	347	8.98704	4.29147			347	0.842209	0.850928	347	14.0835	1.99023
		348	0.977401	1.06144	348	15.9531	6.42408			348	0.775908	0.947819	348	7.80477	4.69003			348	0.977401	1.11571	348	15.9531	6.00199			348	0.775908	1.23764	348	7.80477	1.78
		349	1.03868	1.16511	349	11.3836	4.54558			349	1.38642	0.481037	349	9.74347	6.36745			349	1.03868	1.26513	349	11.3836	4.47448			349	1.38642	1.14184	349	9.74347	1.88309
		350	0.936299	1.00765	350	12.4796	6.87722			350	0.179731	0.112224	350	8.22194	4.23431			350	0.936299	1.1901	350	12.4796	4.60307			350	0.179731	0.307602	350	8.22194	1.43881
		351	1.19536	1.04343	351	9.07414	7.04674			351	1.24056	1.15349	351	2.9868	2.05721			351	1.19536	1.30942	351	9.07414	4.50129			351	1.24056	0.859298	351	2.9868	1.09097
		352	1.44159	1.17149	352	15.0541	7.45172			352	1.06208	1.02375	352	5.89941	3.34091			352	1.44159	1.20486	352	15.0541	5.55396			352	1.06208	0.685786	352	5.89941	1.49432
		353	1.36467	1.1373	353	13.0486	6.3965			353	1.38445	1.13677	353	8.62028	4.1251			353	1.36467	1.08169	353	13.0486	5.72092			353	1.38445	0.894887	353	8.62028	1.52267
		354	0.800172	0.77322	354	14.7376	4.74457			354	1.04649	1.43578	354	6.7995	4.42086			354	0.800172	1.04696	354	14.7376	5.73682			354	1.04649	5.54299	354	6.7995	1.49573
		355	0.997198	0.846218	355	11.6317	7.96647			355	1.38248	0.925546	355	5.51038	5.05168			355	0.997198	0.980635	355	11.6317	4.78771			355	1.38248	2.64292	355	5.51038	1.5048
		356	1.05376	0.852566	356	11.5457	8.0551			356	0.706022	0.817674	356	7.33977	3.12009			356	1.05376	1.03969	356	11.5457	5.27339			356	0.706022	2.60538	356	7.33977	1.69041
		357	1.44442	0.629764	357	8.16462	5.31991			357	0.979293	0.95272	357	10.481	6.44411			357	1.44442	1.06479	357	8.16462	4.35723			357	0.979293	1.0367	357	10.481	1.86181
		358	1.04565	0.896761	358	11.861	5.33256			358	1.18537	1.22788	358	16.0656	3.77264			358	1.04565	1.10181	358	11.861	4.87151			358	1.18537	0.710898	358	16.0656	1.6161
		359	1.08261	0.960951	359	8.03132	5.18744			359	0.743115	1.00775	359	13.9253	3.5056			359	1.08261	1.18553	359	8.03132	3.75095			359	0.743115	0.762687	359	13.9253	2.1011
		360	0.775473	0.83388	360	8.16745	5.68339			360	0.367884	0.122161	360	6.05817	3.60038			360	0.775473	0.946188	360	8.16745	4.1156			360	0.367884	0.292805	360	6.05817	1.61669
		361	0.616155	0.805514	361	12.2245	9.07504			361	0.984668	0.922976	361	10.6158	4.90913			361	0.616155	0.718396	361	12.2245	5.30684			361	0.984668	0.799517	361	10.6158	1.50491
		362	1.01794	0.91755	362	15.6725	7.85209			362	0.623056	0.599395	362	7.63311	5.06751			362	1.01794	1.03833	362	15.6725	5.90549			362	0.623056	0.81858	362	7.63311	1.50982
		363	0.736822	0.54665	363	6.49225	0.847607			363	1.0671	0.84848	363	10.4696	6.336			363	0.736822	0.715971	363	6.49225	2.25846			363	1.0671	0.971733	363	10.4696	1.73005
		364	0.975704	0.503486	364	13.6685	4.13877			364	0.893996	0.949601	364	7.60497	5.36337			364	0.975704	0.762756	364	13.6685	5.05594			364	0.893996	1.63743	364	7.60497	1.47666
		365	0.882565	1.00237	365	1.42179	0.751361			365	1.03448	1.20482	365	2.68916	0.314706			365	0.882565	0.990549	365	1.42179	1.39557			365	1.03448	1.34743	365	2.68916	0.420631
		366	0.476445	0.253746	366	3.54874	3.37797			366	0.844718	1.02989	366	0.229009	0.0084639			366	0.476445	0.612202	366	3.54874	3.0946			366	0.844718	1.18316	366	0.229009	0.0146889
		367	0.667438	0.797222	367	17.6466	4.61595			367	0.981622	1.42385	367	10.1011	5.29576			367	0.667438	0.966514	367	17.6466	5.7232			367	0.981622	3.93543	367	10.1011	1.88779
		368	1.50739	1.41211	368	5.77353	1.55953			368	1.01746	1.18546	368	5.94474	3.77671			368	1.50739	1.36397	368	5.77353	2.22351			368	1.01746	0.679252	368	5.94474	1.79453
		369	0.53527	0.478056	369	11.1247	6.77002			369	0.777162	1.10003	369	0.241732	0.0098003			369	0.53527	0.742074	369	11.1247	4.67439			369	0.777162	1.70207	369	0.241732	0.0193871
		370	1.26757	0.806228	370	11.17	5.03422			370	0.645455	0.709699	370	8.09202	5.28761			370	1.26757	1.32532	370	11.17	4.38412			370	0.645455	1.06402	370	8.09202	1.64207
		371	0.842405	0.751956	371	11.8508	6.62561			371	0.695988	0.675775	371	7.01507	5.31882			371	0.842405	0.79542	371	11.8508	4.79128			371	0.695988	0.88792	371	7.01507	1.64337
		372	0.75775	0.783496	372	15.9746	8.0526			372	0.587934	0.475555	372	9.11826	4.34475			372	0.75775	0.844559	372	15.9746	5.26177			372	0.587934	0.647552	372	9.11826	1.45938
		373	1.55057	0.813012	373	8.87712	4.56148			373	0.688103	0.773367	373	10.9116	5.26146			373	1.55057	1.44057	373	8.87712	4.43861			373	0.688103	0.963687	373	10.9116	1.47607
		374	1.14106	0.789645	374	6.32558	4.77603			374	0.690253	0.730294	374	9.86442	3.25476			374	1.14106	1.14196	374	6.32558	4.20817			374	0.690253	0.727045	374	9.86442	2.62412
		375	1.06168	0.873632	375	7.92178	7.89133			375	0.537581	0.68071	375	6.82924	4.43782			375	1.06168	1.03434	375	7.92178	5.28751			375	0.537581	0.997115	375	6.82924	1.38556
		376	0.838634	0.710855	376	8.36749	7.39725			376	0.499054	0.718609	376	8.98853	4.25275			376	0.838634	0.837641	376	8.36749	4.8402			376	0.499054	0.697721	376	8.98853	1.32513
		377	1.24796	0.935759	377	3.40695	1.37541			377	0.868909	0.982874	377	10.7726	4.77285			377	1.24796	1.32881	377	3.40695	2.47156			377	0.868909	1.57781	377	10.7726	1.45571
		378	1.33544	1.29103	378	12.5686	5.64348			378	0.77537	0.958339	378	8.16943	4.45194			378	1.33544	1.23845	378	12.5686	5.8714			378	0.77537	1.69268	378	8.16943	1.65898
		379	0.758504	0.474961	379	10.7096	6.72551			379	0.748491	0.767405	379	5.70247	3.46965			379	0.758504	0.759975	379	10.7096	5.49184			379	0.748491	0.838777	379	5.70247	1.28582
		380	1.18517	1.0902	380	15.7536	6.38186			380	0.966211	0.85547	380	6.80165	2.78945			380	1.18517	1.16935	380	15.7536	7.98644			380	0.966211	0.783208	380	6.80165	1.48606
		381	1.21779	0.953612	381	10.6653	7.27029			381	0.836834	0.93562	381	6.76509	2.8938			381	1.21779	1.0618	381	10.6653	4.52868			381	0.836834	0.658677	381	6.76509	1.9648
		382	1.05433	0.945479	382	9.82398	6.20957			382	1.2583	1.19584	382	7.36539	3.49035			382	1.05433	1.0113	382	9.82398	3.98737			382	1.2583	1.83551	382	7.36539	1.30931
		383	1.11447	1.11968	383	2.48347	1.45809			383	0.931627	1.15709	383	3.53871	0.326117			383	1.11447	1.09967	383	2.48347	2.34447			383	0.931627	1.45776	383	3.53871	1.38804
		384	1.60525	1.31408	384	11.186	6.27451			384	0.6976	0.846698	384	8.25222	5.66869			384	1.60525	1.19388	384	11.186	4.82109			384	0.6976	1.4435	384	8.25222	1.5581
		385	1.34317	1.2408	385	9.71085	5.24048			385	0.923205	1.0304	385	7.25483	5.31903			385	1.34317	1.14595	385	9.71085	3.62065			385	0.923205	1.79458	385	7.25483	1.67485
		386	1.48269	1.12178	386	12.3917	6.73511			386	0.882349	1.10075	386	6.30672	3.85248			386	1.48269	1.26049	386	12.3917	5.46988			386	0.882349	1.1312	386	6.30672	1.62679
		387	1.17254	1.08132	387	8.30565	3.47239			387	0.822857	1.22476	387	8.67834	5.18895			387	1.17254	1.07692	387	8.30565	3.5218			387	0.822857	2.59707	387	8.67834	1.67761
		388	1.07884	0.964601	388	10.0046	4.79825			388	0.79329	1.0414	388	9.30928	5.84557			388	1.07884	1.08055	388	10.0046	4.77002			388	0.79329	0.750644	388	9.30928	1.81699
		389	0.987771	1.02336	389	2.50798	1.7821			389	0.477192	0.588052	389	8.99032	4.9055			389	0.987771	1.09097	389	2.50798	2.38854			389	0.477192	1.23154	389	8.99032	2.02231
		390	0.994747	1.10746	390	7.23115	5.17494			390	0.820169	0.797765	390	11.6028	5.10544			390	0.994747	1.16157	390	7.23115	4.06126			390	0.820169	1.14184	390	11.6028	1.78891
		391	0.938562	0.946749	391	11.0312	7.1635			391	1.13089	0.899298	391	5.45358	4.65603			391	0.938562	1.07014	391	11.0312	5.13596			391	1.13089	1.1467	391	5.45358	1.34074
		392	1.16651	1.02268	392	19.3534	6.10761			392	0.933061	0.945935	392	5.49031	3.45351			392	1.16651	1.23303	392	19.3534	6.6159			392	0.933061	0.786124	392	5.49031	1.28344
		393	1.47741	1.14464	393	11.5031	6.75709			393	1.08448	1.45596	393	9.71587	3.21539			393	1.47741	1.13219	393	11.5031	4.2683			393	1.08448	3.31434	393	9.71587	1.37946
		394	0.817141	0.768142	394	11.8949	6.31153			394	1.13716	1.29152	394	9.86281	4.25686			394	0.817141	1.05203	394	11.8949	4.61576			394	1.13716	2.34574	394	9.86281	1.37438
		395	1.01379	0.839989	395	8.88655	5.96772			395	0.797769	0.983902	395	8.51115	4.71545			395	1.01379	0.943122	395	8.88655	4.72431			395	0.797769	1.12888	395	8.51115	1.49049
		396	1.06526	0.856295	396	1.5517	0.641745			396	0.377382	0.339207	396	3.06475	0.694279			396	1.06526	1.04176	396	1.5517	1.0429			396	0.377382	0.439424	396	3.06475	0.738007
		397	1.47628	0.693042	397	9.54248	5.03962			397	1.16906	1.18138	397	6.34668	4.35428			397	1.47628	1.14838	397	9.54248	4.13693			397	1.16906	1.36677	397	6.34668	1.39042
		398	1.08185	0.951271	398	8.21345	4.74485			398	0.711219	0.674233	398	12.293	5.11552			398	1.08185	1.11849	398	8.21345	3.83475			398	0.711219	0.738547	398	12.293	2.07626
		399	1.17009	0.980034	399	12.9232	5.34974			399	0.823215	1.04048	399	6.77172	5.31982			399	1.17009	1.1615	399	12.9232	4.80561			399	0.823215	2.71901	399	6.77172	1.6168
		400	0.772268	0.862444	400	16.6588	6.30982			400	0.667854	0.847658	400	6.12609	4.54542			400	0.772268	0.94034	400	16.6588	5.16292			400	0.667854	0.99247	400	6.12609	1.48282
		401	0.62068	0.843084	401	9.23459	4.78825			401	1.12695	1.07139	401	7.5901	5.7293			401	0.62068	0.749847	401	9.23459	4.0967			401	1.12695	1.14757	401	7.5901	1.52462
		402	0.95949	0.930046	402	8.43951	3.47977			402	0.811747	1.01628	402	8.25025	4.36932			402	0.95949	1.0526	402	8.43951	3.94144			402	0.811747	1.79593	402	8.25025	1.51117
		403	0.775661	0.539667	403	15.0196	6.96259			403	0.118447	0.100128	403	10.0191	4.65888			403	0.775661	0.727025	403	15.0196	5.50882			403	0.118447	0.150885	403	10.0191	1.70072
		404	0.993993	0.504319	404	12.104	5.90813			404	0.414654	0.457153	404	8.95072	4.96786			404	0.993993	0.755054	404	12.104	4.81831			404	0.414654	0.455571	404	8.95072	1.71978
		405	0.97495	1.07251	405	10.1811	7.7224			405	1.18519	1.26105	405	9.52073	5.13926			405	0.97495	1.01672	405	10.1811	4.57547			405	1.18519	0.895967	405	9.52073	1.86165
		406	0.502653	0.287151	406	13.0626	6.04778			406	1.02839	1.08115	406	1.84372	0.0970436			406	0.502653	0.63966	406	13.0626	5.25963			406	1.02839	0.807131	406	1.84372	0.20748
		407	0.618417	0.792581	407	16.4757	7.50532			407	1.73495	2.79778	407	10.2477	5.90968			407	0.618417	0.970651	407	16.4757	5.3681			407	1.73495	8.7692	407	10.2477	1.75775
		408	1.58337	1.47067	408	12.9057	8.00023			408	0.527008	0.575545	408	8.83084	4.66299			408	1.58337	1.30492	408	12.9057	5.0297			408	0.527008	1.3551	408	8.83084	1.71044
		409	0.81337	0.762588	409	8.82885	6.21774			409	0.35104	0.292913	409	14.1106	5.37451			409	0.81337	0.808757	409	8.82885	4.19013			409	0.35104	0.506172	409	14.1106	1.97733
		410	1.24457	0.82416	410	19.3959	7.27398			410	1.44878	0.679785	410	13.7814	6.37921			410	1.24457	1.2893	410	19.3959	5.96283			410	1.44878	1.07115	410	13.7814	2.1625
		411	0.783392	0.781591	411	7.05015	3.99972			411	0.763006	0.905671	411	9.22524	4.85238			411	0.783392	0.802409	411	7.05015	3.48757			411	0.763006	0.906929	411	9.22524	1.73069
		412	1.09543	0.803253	412	13.1866	4.72259			412	1.50505	1.64278	412	3.25039	1.99817			412	1.09543	1.17427	412	13.1866	4.91181			412	1.50505	1.63279	412	3.25039	1.35532
		413	1.56396	0.827612	413	11.7631	6.69064			413	0.962269	0.559679	413	7.79743	3.76119			413	1.56396	1.43123	413	11.7631	5.73697			413	0.962269	0.549914	413	7.79743	1.53979
		414	1.07903	0.949803	414	14.9397	6.613			414	0.911199	0.936066	414	5.86518	3.29513			414	1.07903	1.04268	414	14.9397	5.27824			414	0.911199	0.756692	414	5.86518	1.42277
		415	0.75775	0.661066	415	14.9112	6.15998			415	1.40344	0.942302	415	2.84613	1.22315			415	0.75775	0.806902	415	14.9112	5.32282			415	1.40344	0.802001	415	2.84613	1.03108
		416	1.27775	0.976225	416	10.0696	5.81268			416	0.914245	0.996821	416	11.8327	6.82221			416	1.27775	1.35877	416	10.0696	4.73415			416	0.914245	0.811884	416	11.8327	1.9223
		417	1.35467	1.36121	417	12.7096	7.54205			417	0.933419	0.762984	417	8.17785	3.73984			417	1.35467	1.26605	417	12.7096	5.31611			417	0.933419	0.585664	417	8.17785	1.43611
		418	0.749643	0.500669	418	11.4226	3.88987			418	1.14308	1.41364	418	8.46546	4.49299			418	0.749643	0.783296	418	11.4226	4.34917			418	1.14308	0.885652	418	8.46546	1.72702
		419	1.20554	1.17193	419	9.84622	5.5896			419	1.38248	1.48824	419	2.16609	0.168832			419	1.20554	1.18332	419	9.84622	4.28128			419	1.38248	2.18243	419	2.16609	0.392117
		420	1.17952	0.957183	420	14.089	5.3954			420	1.28536	1.30485	420	2.35854	1.14427			420	1.17952	1.09375	420	14.089	4.38412			420	1.28536	1.65439	420	2.35854	1.03373
		421	1.08921	1.02173	421	9.88978	5.2579			421	1.34126	1.40847	421	6.9054	4.46023			421	1.08921	1.01651	421	9.88978	3.87012			421	1.34126	1.72081	421	6.9054	1.64699
		422	0.898402	0.62413	422	11.5861	4.52114			422	1.48211	0.712475	422	6.46656	6.27476			422	0.898402	0.898048	422	11.5861	3.66415			422	1.48211	0.902555	422	6.46656	1.81013
		423	0.650847	0.589218	423	1.73025	1.71402			423	1.01226	1.25166	423	13.1849	5.86774			423	0.650847	0.896265	423	1.73025	2.47812			423	1.01226	1.12894	423	13.1849	2.08328
		424	0.87672	0.739578	424	9.3924	5.71029			424	1.26098	1.47124	424	12.8779	4.7771			424	0.87672	1.00032	424	9.3924	4.54943			424	1.26098	1.94546	424	12.8779	1.68922
		425	0.884262	1.04418	425	16.7765	6.0896			425	0.0847585	0.306791	425	12.8482	5.28928			425	0.884262	0.947757	425	16.7765	5.44192			425	0.0847585	0.206886	425	12.8482	2.53048
		426	0.9478	0.727755	426	9.22008	7.64108			426	1.15687	1.04527	426	12.3165	3.33659			426	0.9478	0.895623	426	9.22008	4.20061			426	1.15687	1.49	426	12.3165	2.24453
		427	1.07016	0.874386	427	10.8779	8.15626			427	1.34162	0.597579	427	6.4929	4.88617			427	1.07016	1.00331	427	10.8779	4.39232			427	1.34162	0.954506	427	6.4929	1.44799
		428	1.67765	1.16015	428	3.70768	1.92789			428	1.04649	1.11501	428	5.11508	3.78449			428	1.67765	1.22818	428	3.70768	2.19669			428	1.04649	1.50631	428	5.11508	1.33231
		429	1.35298	0.937306	429	11.9737	7.50389			429	1.08717	1.28288	429	10.6299	4.82881			429	1.35298	1.0531	429	11.9737	4.51035			429	1.08717	1.6013	429	10.6299	1.70628
		430	1.44159	0.796826	430	1.30339	0.114099			430	0.758347	0.94967	430	10.271	6.11638			430	1.44159	1.05345	430	1.30339	0.25254			430	0.758347	0.591119	430	10.271	2.07502
		431	0.939127	0.821859	431	2.284	2.35886			431	0.98879	1.08245	431	9.97642	2.943			431	0.939127	1.03726	431	2.284	2.30538			431	0.98879	0.696155	431	9.97642	2.0802
		432	1.29472	0.851653	432	16.7357	7.10462			432	0.978934	0.978214	432	7.33905	5.06583			432	1.29472	0.954533	432	16.7357	5.09338			432	0.978934	0.800219	432	7.33905	1.61718
		433	1.60638	1.01629	433	10.149	6.86079			433	0.889517	0.897584	433	10.7063	5.50362			433	1.60638	1.12327	433	10.149	4.05783			433	0.889517	1.00873	433	10.7063	1.84194
		434	1.33054	1.3935	434	12.571	8.35641			434	1.23339	1.11473	434	14.0524	5.54639			434	1.33054	1.12784	434	12.571	4.58702			434	1.23339	0.789256	434	14.0524	2.11471
		435	0.986263	0.752948	435	22.4223	6.01465			435	1.09344	0.531067	435	10.8297	4.32039			435	0.986263	0.999321	435	22.4223	5.7222			435	1.09344	0.902933	435	10.8297	1.77454
		436	1.05753	0.985826	436	10.9873	6.44851			436	0.572702	0.616083	436	11.0754	5.85078			436	1.05753	0.897477	436	10.9873	4.30959			436	0.572702	0.604457	436	11.0754	1.94109
		437	0.947989	0.932268	437	13.5958	6.81941			437	0.799382	0.51969	437	7.23655	2.26363			437	0.947989	1.0006	437	13.5958	4.36543			437	0.799382	1.00246	437	7.23655	2.06362
		438	1.0185	0.99626	438	14.8771	6.90158			438	0.899372	0.668991	438	11.0014	4.40609			438	1.0185	1.01187	438	14.8771	4.82936			438	0.899372	0.611964	438	11.0014	1.96156
		439	1.60279	1.52526	439	13.795	7.17246			439	0.936824	0.628042	439	11.1426	6.64539			439	1.60279	1.24188	439	13.795	4.68737			439	0.936824	0.571246	439	11.1426	1.66373
		440	0.977024	0.682886	440	9.91466	5.10095			440	1.32084	1.61739	440	8.48392	5.49972			440	0.977024	0.974787	440	9.91466	3.67107			440	1.32084	2.70334	440	8.48392	1.60978
		441	0.735313	0.80964	441	12.5814	7.22483			441	0.970691	1.0228	441	7.41879	4.51348			441	0.735313	0.898904	441	12.5814	4.73786			441	0.970691	0.702041	441	7.41879	1.63257
		442	1.02303	0.655988	442	11.4145	5.2652			442	0.861383	0.805955	442	6.22536	3.4116			442	1.02303	1.06337	442	11.4145	4.11624			442	0.861383	0.619956	442	6.22536	1.92721
		443	1.06545	0.475398	443	13.5637	6.72392			443	0.972304	0.942954	443	10.8532	5.1184			443	1.06545	0.751202	443	13.5637	4.60185			443	0.972304	1.12154	443	10.8532	1.73129
		444	1.01775	4.57799	444	11.1155	5.57195			444	0.875719	0.823397	444	13.9859	6.42989			444	1.01775	1.01216	444	11.1155	4.4227			444	0.875719	0.674014	444	13.9859	1.95832
		445	1.04735	1.21517	445	5.79898	3.18774			445	1.11835	1.25129	445	12.8419	5.47292			445	1.04735	0.912811	445	5.79898	3.43679			445	1.11835	1.42082	445	12.8419	1.69527
		446	1.04283	0.713751	446	8.33468	6.17783			446	1.38767	1.10301	446	9.50496	5.99055			446	1.04283	0.817672	446	8.33468	4.51342			446	1.38767	0.785206	446	9.50496	1.81213
		447	1.26342	1.05636	447	1.41369	1.04518			447	1.05581	0.865134	447	2.99397	2.04569			447	1.26342	1.03134	447	1.41369	1.81571			447	1.05581	1.45225	447	2.99397	1.08741
		448	0.603523	0.583704	448	13.1976	5.30305			448	0.237252	0.0133641	448	5.87916	3.28978			448	0.603523	0.755196	448	13.1976	4.24127			448	0.237252	0.0644258	448	5.87916	1.48514
		449	0.991353	7.67345	449	9.23309	4.84399			449	0.0913887	0.00620229	449	8.4126	4.005			449	0.991353	1.04917	449	9.23309	4.02695			449	0.0913887	0.0123127	449	8.4126	1.51738
		450	1.01945	7.2964	450	6.76187	5.62943			450	1.04326	1.05494	450	9.04909	4.98914			450	1.01945	0.963376	450	6.76187	3.51303			450	1.04326	0.67612	450	9.04909	1.80921
		451	0.754922	5.00102	451	12.2203	4.80634			451	1.21834	1.33383	451	7.3145	3.02336			451	0.754922	0.944976	451	12.2203	4.08501			451	1.21834	0.694589	451	7.3145	1.69894
		452	0.862768	0.693042	452	14.753	8.78742			452	1.13537	0.841078	452	5.22062	5.02656			452	0.862768	0.769246	452	14.753	4.66918			452	1.13537	0.670773	452	5.22062	1.51322
		453	0.912354	1.01733	453	0.124438	0.263149			453	0.990403	0.798382	453	13.1989	3.31819			453	0.912354	1.04725	453	0.124438	0.0124808			453	0.990403	0.595493	453	13.1989	2.0667
		454	1.06696	8.15991	454	14.1874	2.54242			454	1.3771	1.54756	454	6.11516	3.63906			454	1.06696	1.05702	454	14.1874	3.68148			454	1.3771	2.7452	454	6.11516	1.62847
		455	1.04358	1.02625	455	7.41931	5.68739			455	1.17766	1.11377	455	10.1961	4.51958			455	1.04358	0.927859	455	7.41931	3.52608			455	1.17766	0.807185	455	10.1961	1.48574
		456	0.849758	9.16879	456	15.8926	7.76013			456	0.803145	0.900566	456	7.57666	4.97718			456	0.849758	1.02122	456	15.8926	5.36718			456	0.803145	0.624061	456	7.57666	1.48676
		457	0.933282	0.912551	457	4.53651	1.48804			457	1.37424	1.2715	457	9.95348	5.99758			457	0.933282	0.961878	457	4.53651	1.71073			457	1.37424	1.58046	457	9.95348	1.66189
		458	0.51076	0.591758	458	2.68936	1.10377			458	1.31331	0.542409	458	7.30321	5.16308			458	0.51076	0.847198	458	2.68936	1.84231			458	1.31331	0.734767	458	7.30321	1.42822
		459	1.29491	1.1949	459	17.5851	5.15515			459	0.81981	0.989145	459	2.70959	0.299286			459	1.29491	1.12021	459	17.5851	5.58406			459	0.81981	1.26427	459	2.70959	0.411828
		460	0.653863	0.896523	460	9.03455	4.34178			460	0.87321	0.841729	460	6.76796	1.98977			460	0.653863	0.895338	460	9.03455	4.84626			460	0.87321	1.01666	460	6.76796	2.26668
		461	1.10259	0.955437	461	11.1004	5.15638			461	1.39484	1.642	461	6.54988	3.28197			461	1.10259	1.02949	461	11.1004	3.59048			461	1.39484	3.95746	461	6.54988	1.31125
		462	1.24438	4.72609	462	10.4596	3.15965			462	1.03556	1.21616	462	9.98807	4.94689			462	1.24438	1.10637	462	10.4596	3.11564			462	1.03556	1.95578	462	9.98807	1.84766
		463	0.910092	0.762152	463	14.6363	6.80156			463	0.795082	0.789267	463	5.76734	3.52177			463	0.910092	0.811253	463	14.6363	4.58324			463	0.795082	0.876363	463	5.76734	1.80144
		464	1.06847	5.8318	464	11.4288	6.816			464	1.46473	1.41642	464	7.98773	5.03167			464	1.06847	1.0312	464	11.4288	4.02346			464	1.46473	2.0087	464	7.98773	1.5743
		465	1.09995	0.845226	465	5.72658	3.30402			465	0.800278	0.999151	465	4.92119	2.16265			465	1.09995	0.892842	465	5.72658	2.73872			465	0.800278	0.863889	465	4.92119	1.30596
		466	1.08958	5.29229	466	10.1539	5.39687			466	0.658357	0.820004	466	8.61347	3.44758			466	1.08958	1.08319	466	10.1539	3.79909			466	0.658357	0.564387	466	8.61347	1.63873
		467	1.20837	1.16626	467	3.89603	2.31807			467	1.10975	1.25495	467	7.13817	5.14879			467	1.20837	1.11764	467	3.89603	2.36544			467	1.10975	1.65336	467	7.13817	1.59763
		468	1.41802	1.31348	468	2.76044	2.79482			468	1.56239	1.42505	468	2.05822	0.324267			468	1.41802	1.25286	468	2.76044	2.39068			468	1.56239	1.44415	468	2.05822	0.54311
		469	0.435343	0.597153	469	7.43081	4.15916			469	1.12569	1.16456	469	5.52902	2.29495			469	0.435343	0.709053	469	7.43081	3.24644			469	1.12569	2.1388	469	5.52902	1.41116
		470	0.696662	0.768896	470	21.4794	5.45729			470	1.05509	1.09239	470	10.6183	4.51345			470	0.696662	0.625324	470	21.4794	5.26919			470	1.05509	1.5122	470	10.6183	1.5527
		471	1.06036	1.24632	471	17.7627	6.77193			471	1.84784	0.734474	471	8.00457	3.07644			471	1.06036	0.999891	471	17.7627	5.04667			471	1.84784	1.35942	471	8.00457	1.80408
		472	0.568454	0.605762	472	15.2014	6.94109			472	1.38857	1.49808	472	11.9739	4.26837			472	0.568454	0.76839	472	15.2014	4.84284			472	1.38857	1.06856	472	11.9739	1.93007
		473	0.519056	0.615244	473	7.05675	1.01526			473	1.41635	1.55133	473	4.92513	2.47667			473	0.519056	0.975215	473	7.05675	2.18878			473	1.41635	1.50809	473	4.92513	1.33085
		474	1.07412	0.819518	474	5.13965	1.62158			474	0.729855	0.978899	474	5.00004	1.66245			474	1.07412	1.02699	474	5.13965	1.84673			474	0.729855	1.26745	474	5.00004	1.33053
		475	0.907452	0.942464	475	4.60551	0.664597			475	0.726271	0.793516	475	9.01057	5.56075			475	0.907452	0.999677	475	4.60551	1.25165			475	0.726271	0.6111	475	9.01057	1.5561
		476	0.64651	0.567676	476	11.1144	6.61899			476	1.18178	1.44503	476	7.8304	3.39515			476	0.64651	0.646078	476	11.1144	4.19441			476	1.18178	1.65968	476	7.8304	1.38324
		477	0.77321	0.905132	477	17.2209	7.71566			477	0.66427	0.802768	477	9.11665	4.28873			477	0.77321	0.864243	477	17.2209	5.67749			477	0.66427	0.885112	477	9.11665	1.65017
		478	1.13992	1.07485	478	16.3458	8.01372			478	1.20615	0.900428	478	7.91982	4.50992			478	1.13992	1.02906	478	16.3458	5.41339			478	1.20615	1.38254	478	7.91982	1.43886
		479	0.711746	0.702405						479	0.803862	1.07327	479	16.5654	4.40301			479	0.711746	0.837498						479	0.803862	2.15386	479	16.5654	2.22439
		480	1.08468	0.910051						480	1.38785	1.46922	480	13.0542	5.97959			480	1.08468	0.986626						480	1.38785	2.59836	480	13.0542	1.56885
		481	0.64783	0.773855						481	1.58748	1.37029	481	8.99139	4.33283			481	0.64783	0.873657						481	1.58748	1.24591	481	8.99139	1.45895
		482	1.10146	1.20089						482	0.965136	0.928938	482	7.82	3.52729			482	1.10146	1.09418						482	0.965136	0.672772	482	7.82	1.33831
		483	0.694588	0.788296						483	1.41384	1.47402	483	9.37881	4.10766			483	0.694588	0.806546						483	1.41384	1.21653	483	9.37881	1.33442
		484	0.575053	0.64						484	1.23446	1.19975	484	9.21915	6.62309			484	0.575053	0.768961						484	1.23446	0.718728	484	9.21915	1.70445
		485	0.70081	0.81087						485	0.97105	0.87514	485	6.0028	4.13326			485	0.70081	0.860962						485	0.97105	0.869829	485	6.0028	1.30623
		486	1.24004	1.13146						486	1.33822	0.936786	486	8.59842	5.05959			486	1.24004	1.15708						486	1.33822	1.01839	486	8.59842	1.41072
		487	0.765669	0.798373						487	0.724659	0.943125	487	8.49108	4.37296			487	0.765669	0.843204						487	0.724659	0.758907	487	8.49108	1.48412
		488	1.46761	0.985667						488	1.14702	1.14917	488	5.11239	3.26802			488	1.46761	1.09924						488	1.14702	0.692051	488	5.11239	1.38097
		489	0.608802	0.561765						489	0.775012	0.950115	489	4.39974	2.4765			489	0.608802	0.852974						489	0.775012	0.700421	489	4.39974	1.04194
		490	1.15407	0.833086						490	0.694375	0.812294	490	2.78538	2.81714			490	1.15407	0.950967						490	0.694375	0.58102	490	2.78538	1.08989
		491	0.931208	0.87022						491	0.797769	0.880382	491	12.7914	4.29233			491	0.931208	0.904752						491	0.797769	0.649496	491	12.7914	1.73464
		492	1.59431	1.17491						492	0.763902	0.74801	492	7.67325	5.76385			492	1.59431	1.2749						492	0.763902	0.943597	492	7.67325	1.42666
		493	0.928192	0.844155						493	1.22425	1.19303	493	7.28655	4.09478			493	0.928192	1.03748						493	1.22425	0.835429	493	7.28655	1.33226
		494	1.04113	0.964125						494	1.11333	1.17919	494	9.00644	1.95852			494	1.04113	1.01694						494	1.11333	0.918054	494	9.00644	1.45652
		495	0.617475	0.658923						495	1.20884	1.72626	495	4.65706	4.1321			495	0.617475	0.762899						495	1.20884	3.15103	495	4.65706	1.14762
		496	0.487004	0.595923						496	1.13483	1.27377	496	9.73379	4.53754			496	0.487004	0.941767						496	1.13483	0.940681	496	9.73379	1.45252
		497	0.962129	1.02859						497	0.992015	1.03057	497	7.48115	2.977			497	0.962129	0.971934						497	0.992015	1.19336	497	7.48115	1.05322
		498	0.86371	0.945638						498	1.01352	0.702743	498	7.61734	4.53737			498	0.86371	0.831436						498	1.01352	1.14195	498	7.61734	1.39706
		499	0.752282	0.570731						499	1.26582	1.0034	499	9.0215	6.52803			499	0.752282	0.762471						499	1.26582	1.38264	499	9.0215	1.57468
		500	0.95949	0.431123						500	1.20812	0.536447	500	7.05341	5.06994			500	0.95949	0.888135						500	1.20812	1.20973	500	7.05341	1.34981
		501	0.798098	0.796389						501	0.618934	0.684479	501	7.93541	5.30625			501	0.798098	0.854258						501	0.618934	0.64766	501	7.93541	1.54184
		502	0.763218	0.854906						502	1.49555	1.30145	502	2.19458	1.82255			502	0.763218	0.927289						502	1.49555	1.57749	502	2.19458	1.06041
		503	0.679316	0.689392						503	1.19934	1.23463	503	7.27239	3.18013			503	0.679316	0.776307						503	1.19934	0.87847	503	7.27239	1.23116
		504	0.864653	0.731762						504	0.93987	0.92678	504	9.18403	4.5996			504	0.864653	0.791355						504	0.93987	0.615096	504	9.18403	1.37724
		505	1.11315	1.08588						505	0.768023	1.04599	505	10.6514	4.6683			505	1.11315	1.08761						505	0.768023	2.1321	505	10.6514	1.60643
		506	0.97891	1.13738						506	0.610333	0.701167	506	12.3047	5.72026			506	0.97891	1.04675						506	0.610333	0.703229	506	12.3047	1.88044
		507	0.899156	0.882796						507	0.552274	0.620572	507	8.89803	4.96687			507	0.899156	0.962449						507	0.552274	0.594737	507	8.89803	1.5399
		508	0.817518	0.719821						508	1.09129	1.32074	508	8.8475	5.04582			508	0.817518	1.0098						508	1.09129	1.51095	508	8.8475	1.45188
		509	0.69308	0.756121						509	0.886291	0.895837	509	9.47074	5.68555			509	0.69308	0.886922						509	0.886291	1.01407	509	9.47074	1.4441
		510	1.07092	0.713275						510	1.2531	1.28172	510	9.78074	5.84715			510	1.07092	0.966086						510	1.2531	0.746864	510	9.78074	1.59299
		511	1.05131	0.919732						511	0.927864	1.37256	511	8.61401	4.43573			511	1.05131	0.947472						511	0.927864	0.958178	511	8.61401	1.27707
		512	0.824494	0.81083						512	1.17264	1.29203	512	8.3196	4.15481			512	0.824494	0.833076						512	1.17264	1.97446	512	8.3196	1.44188
		513	0.656691	0.660391						513	0.674484	0.76086	513	4.53055	4.30586			513	0.656691	0.730591						513	0.674484	0.647498	513	4.53055	1.3072
		514	1.11786	0.675784						514	1.31582	1.269	514	7.3136	4.91653			514	1.11786	0.996896						514	1.31582	0.804863	514	7.3136	1.54147
		515	0.781506	0.788732						515	0.826799	1.16894	515	6.00818	4.65069			515	0.781506	0.752272						515	0.826799	4.08372	515	6.00818	1.5001
		516	1.05301	0.836776						516	0.988431	1.1614	516	3.85786	2.77338			516	1.05301	0.884283						516	0.988431	0.933823	516	3.85786	1.27809
		517	1.1075	1.07235						517	1.27048	1.21637	517	14.2545	6.06231			517	1.1075	0.956102						517	1.27048	0.950564	517	14.2545	2.24815
		518	0.630484	0.655472						518	1.1549	0.984622	518	5.96284	4.7306			518	0.630484	0.726312						518	1.1549	2.24885	518	5.96284	1.44313
		519	0.71118	0.716885						519	0.700826	0.688454	519	5.4	2.50453			519	0.71118	0.770601						519	0.700826	0.925722	519	5.4	1.21707
		520	0.522261	0.39752						520	1.15401	1.14691	520	9.79131	5.90742			520	0.522261	0.707555						520	1.15401	0.873987	520	9.79131	2.13237
		521	0.652355	0.70177						521	1.57189	1.80264	521	1.44358	0.125279			521	0.652355	0.724743						521	1.57189	5.35722	521	1.44358	0.27169
		522	0.865596	0.796072						522	1.06369	1.27332	522	9.70817	5.33873			522	0.865596	0.80084						522	1.06369	0.970869	522	9.70817	1.52257
		523	0.724378	0.733151						523	1.34216	1.16586	523	10.9509	4.27293			523	0.724378	0.71212						523	1.34216	1.04464	523	10.9509	1.94773
		524	0.901607	0.847686						524	1.20203	1.07752	524	3.60269	0.658059			524	0.901607	0.909459						524	1.20203	0.816096	524	3.60269	0.788338
		525	0.681579	0.681021						525	0.956714	1.07954	525	5.66699	3.17019			525	0.681579	0.760474						525	0.956714	0.780292	525	5.66699	1.43821
		526	1.02152	0.758026						526	0.76874	0.839468	526	10.6081	4.68814			526	1.02152	0.814534						526	0.76874	0.850874	526	10.6081	1.64477
		527	0.938939	0.757034						527	0.880736	1.01173	527	11.5221	6.17165			527	0.938939	0.791569						527	0.880736	0.876039	527	11.5221	1.99088
		528	0.917633	0.830111						528	0.923563	0.914958	528	7.07796	4.56975			528	0.917633	0.876795						528	0.923563	0.754262	528	7.07796	1.49324
		529	0.666496	0.696573						529	1.4529	1.19711	529	4.66441	3.08442			529	0.666496	0.736867						529	1.4529	1.09977	529	4.66441	1.3746
		530	1.07507	0.802023						530	0.916575	1.00635	530	6.66922	5.77663			530	1.07507	0.83978						530	0.916575	0.977511	530	6.66922	1.51139
		531	1.17914	1.10282						531	1.10795	1.08773	531	8.36708	5.56171			531	1.17914	1.08847						531	1.10795	1.24434	531	8.36708	1.461
		532	0.395938	0.563987						532	0.698496	0.537783	532	9.95223	6.46268			532	0.395938	0.687443						532	0.698496	0.595007	532	9.95223	1.65509
		533	0.72155	0.736325						533	1.61704	1.36927	533	9.0525	6.16597			533	0.72155	0.614912						533	1.61704	0.996953	533	9.0525	1.6977
		534	1.06809	1.17804						534	0.671796	0.915574	534	9.56571	6.05861			534	1.06809	0.948399						534	0.671796	1.35467	534	9.56571	1.58137
		535	0.585988	0.55752						535	0.816943	0.813254	535	7.7546	3.61402			535	0.585988	0.731162						535	0.816943	0.852872	535	7.7546	1.27156
		536	0.498693	0.555695						536	0.918008	0.962349	536	8.17785	4.13096			536	0.498693	0.671539						536	0.918008	1.00381	536	8.17785	1.58764
		537	0.491906	0.583823						537	0.803504	0.840941	537	4.77819	0.731082			537	0.491906	0.920656						537	0.803504	0.638317	537	4.77819	0.773001
		538	1.02831	0.766952						538	0.843285	0.515304	538	6.96794	4.22287			538	1.02831	0.927431						538	0.843285	0.710466	538	6.96794	1.45841
		539	0.865973	0.919017						539	0.954743	1.10918	539	11.1992	5.2395			539	0.865973	0.942908						539	0.954743	0.756206	539	11.1992	1.87666
		540	0.651224	0.562995						540	1.0671	0.953302	540	6.56296	3.83997			540	0.651224	0.635095						540	1.0671	0.983722	540	6.56296	1.46176
		541	0.677997	0.874981						541	0.33545	0.256898	541	7.93469	4.79896			541	0.677997	0.831793						541	0.33545	0.509628	541	7.93469	1.87888
		542	0.716271	0.639246						542	1.33678	1.39603	542	9.66534	4.91605			542	0.716271	0.797845						542	1.33678	0.963741	542	9.66534	1.70429
		543	1.03528	0.922866						543	1.15239	1.48331	543	15.5692	2.53896			543	1.03528	0.929642						543	1.15239	0.906605	543	15.5692	2.47135
		544	1.0745	0.866332						544	1.04506	1.06487	544	6.16515	3.59184			544	1.0745	0.962877						544	1.04506	1.72492	544	6.16515	1.12159
		545	0.67366	0.779052						545	0.997749	0.710659	545	5.47741	3.68546			545	0.67366	0.89006						545	0.997749	0.767277	545	5.47741	1.34619
		546	1.09713	1.21997						546	0.995778	0.625609	546	4.76583	3.0297			546	1.09713	1.04575						546	0.995778	0.845096	546	4.76583	1.12559
		547	1.12352	1.58104						547	0.113071	0.129597	547	5.36272	3.16944			547	1.12352	2.82316						547	0.113071	0.155475	547	5.36272	1.21351
		548	0.656126	0.736523						548	0.973738	0.992675	548	4.61925	3.51324			548	0.656126	0.755838						548	0.973738	0.833269	548	4.61925	1.20848
		549	0.552805	0.61695						549	0.995778	0.749689	549	4.98642	2.88287			549	0.552805	0.72674						549	0.995778	0.933283	549	4.98642	1.29224
		550	1.09675	0.806069						550	1.43857	1.63076	550	7.92895	3.48377			550	1.09675	0.970151						550	1.43857	2.8747	550	7.92895	1.48925
		551	0.724944	0.830865						551	1.28213	1.40281	551	7.03585	6.15387			551	0.724944	0.841492						551	1.28213	1.19007	551	7.03585	1.33031
		552	0.745306	0.745648						552	0.83092	0.531238	552	0.446729	0.00956043			552	0.745306	0.783581						552	0.83092	0.781696	552	0.446729	0.0266236
		553	1.18819	0.800713						553	0.205893	0.0833368	553	8.69536	3.49713			553	1.18819	0.93007						553	0.205893	0.0919134	553	8.69536	1.56922
		554	0.622942	0.561249						554	1.17336	1.023	554	4.94861	2.58759			554	0.622942	0.815247						554	1.17336	1.53698	554	4.94861	1.28582
		555	0.923667	0.819558						555	1.28751	1.42704	555	2.56963	0.778987			555	0.923667	0.874227						555	1.28751	1.28679	555	2.56963	0.772137
		556	1.64522	1.14015						556	1.14093	1.28192	556	10.3904	5.92291			556	1.64522	1.23139						556	1.14093	1.56053	556	10.3904	2.05325
		557	0.98268	1.37351						557	1.22604	1.46789	557	8.76633	3.75626			557	0.98268	1.09582						557	1.22604	1.15135	557	8.76633	1.72983
		558	0.929889	0.822851						558	0.561413	0.69517	558	6.5454	3.55398			558	0.929889	0.991904						558	0.561413	0.589391	558	6.5454	1.63673
		559	1.06093	0.942504						559	1.06172	1.2296	559	8.15474	3.75047			559	1.06093	0.974502						559	1.06172	1.99844	559	8.15474	1.51209
		560	0.909338	0.989595						560	1.0791	1.26561	560	8.67297	4.12442			560	0.909338	0.832506						560	1.0791	1.32929	560	8.67297	1.61345
		561	0.902927	0.963411						561	1.16942	1.37177	561	6.49272	3.74704			561	0.902927	0.934349						561	1.16942	1.13234	561	6.49272	1.55583
		562	0.784523	0.544983						562	1.35166	1.76604	562	10.5319	4.17335			562	0.784523	0.708482						562	1.35166	1.41937	562	10.5319	1.39868
		563	0.915371	0.845901						563	1.01208	1.19759	563	9.10339	5.02403			563	0.915371	0.866596						563	1.01208	2.48793	563	9.10339	2.74514
		564	0.703827	0.821819						564	1.13913	0.936134	564	7.4704	4.8077			564	0.703827	0.868879						564	1.13913	0.753182	564	7.4704	1.57986
		565	0.622942	0.574579						565	1.60629	1.41474	565	5.99671	4.11249			565	0.622942	0.904467						565	1.60629	1.09178	565	5.99671	1.58256
		566	1.08562	0.353801						566	1.32191	1.53402	566	12.2359	6.77797			566	1.08562	0.869378						566	1.32191	1.40878	566	12.2359	2.38942
		567	0.669701	0.697287						567	0.82429	0.970264	567	10.0112	5.94604			567	0.669701	0.749491						567	0.82429	0.770193	567	10.0112	1.76639
		568	1.20327	1.2796						568	0.664091	1.28812	568	10.1981	4.18014			568	1.20327	1.22205						568	0.664091	0.725749	568	10.1981	1.43465
		569	0.92838	0.74053						569	0.809238	0.561564	569	6.32499	4.64072			569	0.92838	0.800769						569	0.809238	0.664239	569	6.32499	1.4583
		570	1.10165	1.14051						570	2.70528	0.651549	570	10.5153	4.91619			570	1.10165	1.09831						570	2.70528	1.07218	570	10.5153	1.58132
		571	0.981172	1.14047						571	1.4848	1.36844	571	9.2876	3.96556			571	0.981172	1.03484						571	1.4848	1.04642	571	9.2876	1.33917
		572	0.952137	0.890096						572	0.792931	0.697329	572	7.92895	4.17044			572	0.952137	0.970651						572	0.792931	0.688	572	7.92895	1.91528
		573	0.830716	0.728906						573	1.29467	0.743863	573	7.60945	5.34754			573	0.830716	0.954033						573	1.29467	0.725209	573	7.60945	1.46403
		574	0.599375	0.695303						574	0.799561	0.902861	574	7.32991	3.35345			574	0.599375	0.76083						574	0.799561	0.802379	574	7.32991	1.82234
		575	1.06545	1.3161						575	0.765515	0.922873	575	10.245	5.22712			575	1.06545	1.11671						575	0.765515	0.689674	575	10.245	1.91657
		576	1.05414	0.966228						576	0.785047	1.03815	576	1.80036	0.899024			576	1.05414	0.965088						576	0.785047	0.652358	576	1.80036	0.831757
		577	0.81073	0.811227						577	0.67323	0.86599	577	6.71671	3.0568			577	0.81073	0.805904						577	0.67323	0.5875	577	6.71671	1.76666
		578	1.13804	0.776077						578	1.26833	1.59255	578	7.98737	6.02143			578	1.13804	1.0148						578	1.26833	0.910709	578	7.98737	2.60684
		579	0.721361	0.676816						579	0.73774	0.767782	579	11.3623	5.79798			579	0.721361	0.765252						579	0.73774	0.686758	579	11.3623	2.03732
		580	1.07375	0.708713						580	1.09774	1.04894	580	9.04712	4.52236			580	1.07375	0.991904						580	1.09774	0.798977	580	9.04712	1.77244
		581	0.99569	1.21331						581	0.911378	0.702915	581	5.78096	4.35027			581	0.99569	1.18325						581	0.911378	0.641882	581	5.78096	1.17462
		582	0.819592	1.14464						582	0.689357	0.601142	582	8.025	2.2307			582	0.819592	1.05752						582	0.689357	0.537872	582	8.025	1.86873
		583	0.943087	0.882519						583	1.03825	1.17038	583	7.22938	2.92052			583	0.943087	1.02393						583	1.03825	0.743192	583	7.22938	1.58116
		584	0.809787	0.807259						584	0.973021	0.718506	584	11.9262	5.65871			584	0.809787	0.745925						584	0.973021	0.626167	584	11.9262	2.13669
		585	1.08298	0.889977						585	1.04273	1.06501	585	1.4004	0.666421			585	1.08298	0.871731						585	1.04273	0.819768	585	1.4004	0.900773
		586	1.08826	1.20065						586	1.17372	1.357	586	8.02805	4.08727			586	1.08826	1.0056						586	1.17372	0.914976	586	8.02805	1.65579
		587	0.594096	0.687726						587	1.19217	0.70802	587	10.4982	4.48645			587	0.594096	0.745425						587	1.19217	0.726883	587	10.4982	1.41337
		588	1.13163	1.22485						588	0.768561	0.767987	588	10.4955	4.27821			588	1.13163	1.15743						588	0.768561	0.595493	588	10.4955	1.89805
		589	0.705147	0.739538						589	0.706022	0.731665	589	6.85559	3.87694			589	0.705147	0.770031						589	0.706022	0.752912	589	6.85559	1.41126
		590	0.506801	0.411921						590	0.961373	0.849028	590	1.78602	3.00444			590	0.506801	0.712476						590	0.961373	0.778942	590	1.78602	10.2553
		591	0.66329	0.699112						591	0.934494	0.965535	591	9.21825	2.90695			591	0.66329	0.719893						591	0.934494	0.822144	591	9.21825	2.62013
		592	0.841274	0.813964						592	0.785584	0.866264	592	8.09525	4.46068			592	0.841274	0.775522						592	0.785584	0.580696	592	8.09525	1.42288
		593	0.713065	0.740847						593	0.651548	0.867361	593	7.90297	2.74587			593	0.713065	0.726027						593	0.651548	0.536197	593	7.90297	1.67534
		594	1.07073	1.09616						594	1.5115	1.46103	594	1.15239	0.0741533			594	1.07073	1.11714						594	1.5115	0.710196	594	1.15239	0.138356
		595	0.856734	0.883312						595	0.606032	0.610394	595	2.06108	0.834122			595	0.856734	0.8922						595	0.606032	0.489809	595	2.06108	1.32265
		596	0.655183	0.685901						596	1.00062	1.09654	596	8.05027	3.17975			596	0.655183	0.764824						596	1.00062	0.735847	596	8.05027	1.18488
		597	1.13087	1.24901						597	0.871776	0.901285	597	7.44083	2.57871			597	1.13087	1.02942						597	0.871776	0.682924	597	7.44083	1.51365
		598	1.28001	1.41278						598	0.776445	0.870445	598	2.19118	0.870514			598	1.28001	1.08333						598	0.776445	0.651872	598	2.19118	1.3902
		599	1.08355	0.81805						599	0.720895	0.85852	599	8.06281	3.16982			599	1.08355	0.940554						599	0.720895	0.653546	599	8.06281	1.15885
		600	0.928757	0.872323						600	1.28643	1.39462	600	5.73688	5.02218			600	0.928757	0.818884						600	1.28643	0.980536	600	5.73688	1.52089
		601	1.05565	1.29008						601	1.1058	1.07043	601	8.99587	4.41408			601	1.05565	0.919158						601	1.1058	0.900881	601	8.99587	1.65838
		602	0.819215	0.8242						602	1.04237	1.03633	602	12.9532	7.19928			602	0.819215	0.900045						602	1.04237	1.07326	602	12.9532	2.56321
		603	0.847119	1.32066						603	1.20974	1.16661	603	9.66803	2.53437			603	0.847119	1.09774						603	1.20974	0.996791	603	9.66803	1.56679
		604	0.692703	0.704904						604	1.02355	0.956318	604	5.65427	3.82116			604	0.692703	0.735227						604	1.02355	0.796979	604	5.65427	1.63635
		605	0.573167	0.649005						605	0.956714	0.962691	605	8.70253	4.00041			605	0.573167	0.727881						605	0.956714	0.75545	605	8.70253	1.60686
		606	0.670455	0.789764						606	0.568402	0.669265	606	8.38697	4.09704			606	0.670455	0.898262						606	0.568402	0.711438	606	8.38697	1.5318
		607	1.11127	0.921358						607	1.11871	1.24882	607	6.92708	5.97654			607	1.11127	0.987339						607	1.11871	0.968061	607	6.92708	1.56901
		608	0.876343	0.852883						608	1.14093	1.25684	608	8.39898	5.52432			608	0.876343	0.757336						608	1.14093	0.827383	608	8.39898	1.46592
		609	0.644436	0.89807						609	0.78648	1.00542	609	11.384	5.95211			609	0.644436	0.777519						609	0.78648	2.84435	609	11.384	1.75969
		610	0.853718	0.835427						610	0.941483	0.94895	610	4.47428	3.2107			610	0.853718	0.823377						610	0.941483	2.57908	610	4.47428	1.36207
		611	0.755487	0.837054						611	0.988073	0.886722	611	9.39207	3.13682			611	0.755487	1.06172						611	0.988073	0.71619	611	9.39207	2.29211
		612	1.03717	0.888509						612	0.765694	0.949601	612	0.947038	0.755788			612	1.03717	0.998037						612	0.765694	0.830407	612	0.947038	0.967953
		613	0.870875	1.05509						613	1.05455	1.42817	613	7.44531	5.41402			613	0.870875	0.984843						613	1.05455	1.74652	613	7.44531	1.6741
		614	0.728337	0.821581						614	1.0524	1.25745	614	9.24119	6.47529			614	0.728337	0.834146						614	1.0524	0.702365	614	9.24119	1.79177
		615	0.660462	0.491862						615	0.939512	1.09434	615	3.80804	0.981881			615	0.660462	0.738935						615	0.939512	1.10636	615	3.80804	0.997439
		616	0.749454	0.829079						616	0.892025	0.928904	616	9.51607	5.95786			616	0.749454	0.747351						616	0.892025	0.819498	616	9.51607	1.62247
		617	0.977778	0.988365						617	0.592951	0.654187	617	7.94096	5.08447			617	0.977778	0.879006						617	0.592951	0.632377	617	7.94096	1.91592
		618	1.30226	1.19458						618	1.1696	1.4245	618	7.93236	3.75602			618	1.30226	0.977854						618	1.1696	0.832837	618	7.93236	1.28722
		619	0.770382	0.562598						619	1.39896	1.24015	619	7.31629	4.38265			619	0.770382	0.729307						619	1.39896	1.28727	619	7.31629	1.61216
		620	0.977213	0.846139						620	1.07373	1.24916	620	8.80234	4.64493			620	0.977213	0.815532						620	1.07373	1.20584	620	8.80234	1.65887
		621	0.165917	0.140838						621	0.821961	0.960704	621	4.89073	0.764424			621	0.165917	0.196555						621	0.821961	0.709386	621	4.89073	0.802919
		622	0.908395	0.970274						622	1.02337	1.04048	622	7.53437	4.33019			622	0.908395	0.984843						622	1.02337	0.965145	622	7.53437	1.79993
		623	0.813558	0.922747						623	0.682906	0.783133	623	7.75657	5.50054			623	0.813558	0.860748						623	0.682906	0.835861	623	7.75657	1.5419
		624	1.17744	1.04379						624	0.96424	1.09784	624	7.92376	3.97556			624	1.17744	1.06736						624	0.96424	1.1123	624	7.92376	1.67728
		625	1.17594	1.357						625	0.904927	0.881273	625	9.47701	4.07929			625	1.17594	0.961308						625	0.904927	0.857624	625	9.47701	1.87132
		626	1.05847	1.25651						626	1.29664	1.2347	626	7.17975	3.34739			626	1.05847	0.941767						626	1.29664	0.833971	626	7.17975	1.3719
		627	1.63126	1.49419						627	1.1678	1.19793	627	6.44308	4.68105			627	1.63126	1.07613						627	1.1678	0.754748	627	6.44308	1.70753
		628	0.892369	0.954286						628	1.25471	1.08893	628	10.1873	6.23871			628	0.892369	0.961094						628	1.25471	0.816906	628	10.1873	1.72238
		629	1.44781	1.29539						629	0.991119	1.04226	629	15.9873	2.84339			629	1.44781	1.04532						629	0.991119	0.777754	629	15.9873	2.62029
		630	1.28265	1.28762						630	1.15616	1.32054	630	9.21037	5.49122			630	1.28265	1.07435						630	1.15616	0.68422	630	9.21037	1.67464
		631	0.829396	0.873553						631	1.17426	0.965433	631	7.58652	5.23298			631	0.829396	0.895623						631	1.17426	0.720726	631	7.58652	1.71341
		632	1.18253	1.14003						632	1.15974	1.09753	632	8.79589	4.79958			632	1.18253	1.05003						632	1.15974	0.803729	632	8.79589	1.73501
		633	1.25116	0.866649						633	1.38427	1.40004	633	2.02614	0.645175			633	1.25116	1.01843						633	1.38427	1.61729	633	2.02614	0.800219
		634	1.02095	1.02233						634	1.41115	0.600971	634	5.11472	3.81921			634	1.02095	0.991832						634	1.41115	0.775702	634	5.11472	1.2492
		635	0.743044	1.11183						635	1.4624	1.85668	635	6.59378	4.19244			635	0.743044	0.822735						635	1.4624	4.2056	635	6.59378	1.30709
		636	1.43235	1.20522						636	0.930552	0.920406	636	5.63223	4.05445			636	1.43235	1.01515						636	0.930552	1.057	636	5.63223	1.45009
		637	1.47289	1.29849						637	1.0257	1.24964	637	4.94968	4.20471			637	1.47289	1.10822						637	1.0257	1.97943	637	4.94968	1.26367
		638	0.972499	0.985628						638	1.50343	1.51099	638	12.7378	4.71093			638	0.972499	0.982561						638	1.50343	2.04872	638	12.7378	2.41232
		639	0.814501	0.812576						639	0.610154	0.770763	639	2.61927	1.14263			639	0.814501	0.87059						639	0.610154	0.542732	639	2.61927	0.870369
		640	1.02039	1.22224						640	1.62959	1.4977	640	8.91595	5.72108			640	1.02039	1.05623						640	1.62959	1.48255	640	8.91595	2.02533
		641	0.65556	0.638254						641	1.87634	0.83097	641	8.98028	5.56517			641	0.65556	0.810611						641	1.87634	1.44275	641	8.98028	1.86079
		642	1.71535	1.26512						642	1.06871	1.13742	642	4.18041	2.11577			642	1.71535	0.977497						642	1.06871	1.52797	642	4.18041	0.978591
		643	1.12126	0.770523						643	1.25489	1.51247	643	11.5818	5.4624			643	1.12126	1.01501						643	1.25489	1.68355	643	11.5818	1.76175
		644	1.26644	1.00753						644	0.669288	0.815721	644	8.28483	4.22924			644	1.26644	0.80405						644	0.669288	0.88738	644	8.28483	1.74144
		645	0.978721	0.843322						645	1.54949	1.91479	645	5.03426	3.36027			645	0.978721	0.930569						645	1.54949	5.55828	645	5.03426	1.19072
		646	0.694211	0.441755						646	1.55719	1.49547	646	5.3724	3.35616			646	0.694211	0.848624						646	1.55719	1.2795	646	5.3724	1.29132
		647	1.24532	1.14035						647	1.00545	0.941446	647	6.54648	4.46075			647	1.24532	0.963661						647	1.00545	0.685678	647	6.54648	1.56852
		648	1.04565	0.886644						648	1.16279	1.1417	648	6.7719	4.58116			648	1.04565	0.88193						648	1.16279	0.670503	648	6.7719	1.56987
		649	0.88313	0.943892						649	2.04281	0.198096	649	11.284	5.29857			649	0.88313	0.854615						649	2.04281	0.652412	649	11.284	2.14031
		650	0.775661	0.809045						650	0.957968	0.850056	650	6.15781	5.02536			650	0.775661	0.749419						650	0.957968	0.846554	650	6.15781	1.41342
		651	1.19385	0.987929						651	0.786659	0.877504	651	4.55098	3.89195			651	1.19385	0.982204						651	0.786659	0.645878	651	4.55098	1.21815
		652	1.22232	0.588782						652	0.759064	0.806709	652	8.66436	4.86842			652	1.22232	0.942836						652	0.759064	0.961526	652	8.66436	1.51176
		653	1.44725	1.22704						653	1.03968	1.07721	653	7.15609	2.84901			653	1.44725	1.00945						653	1.03968	1.21891	653	7.15609	1.32205
		654	0.819215	0.908068						654	0.921771	0.888435	654	6.69646	3.73964			654	0.819215	0.821238						654	0.921771	0.57616	654	6.69646	1.61102
		655	1.61034	1.20696						655	0.55102	0.615123	655	7.49047	3.3077			655	1.61034	0.97008						655	0.55102	0.60867	655	7.49047	1.65477
		656	0.538664	0.63631						656	1.0223	1.11799	656	8.09453	4.54707			656	0.538664	0.834004						656	1.0223	0.805619	656	8.09453	1.59212
		657	1.10316	1.32705						657	1.39771	1.32253	657	9.82769	4.66378			657	1.10316	1.11379						657	1.39771	0.987016	657	9.82769	1.88779
		658	0.827888	0.908861						658	0.63542	0.732624	658	5.58636	2.76495			658	0.827888	0.851263						658	0.63542	0.622495	658	5.58636	1.1851
		659	1.06677	1.11325						659	1.26081	1.2408	659	7.52577	2.922			659	1.06677	1.05802						659	1.26081	0.789202	659	7.52577	1.37967
		660	1.09939	0.836062						660	1.25489	1.16267	660	7.70245	4.25676			660	1.09939	0.920585						660	1.25489	0.951752	660	7.70245	1.51527
		661	1.09185	1.06382						661	1.1058	1.07317	661	4.59828	4.68931			661	1.09185	0.966015						661	1.1058	0.74762	661	4.59828	1.30833
		662	0.67234	0.604254						662	1.17246	1.12772	662	3.51846	1.65755			662	0.67234	0.834075						662	1.17246	0.853034	662	3.51846	1.1075
		663	0.941201	0.810513						663	0.800457	0.900291	663	1.59643	0.855265			663	0.941201	0.833932						663	0.800457	0.909305	663	1.59643	1.16841
		664	0.54432	0.212249						664	1.04559	1.22154	664	8.5314	3.08141			664	0.54432	0.568198						664	1.04559	0.830623	664	8.5314	1.40138
		665	1.11032	1.32903						665	1.31474	1.40412	665	9.56589	3.6759			665	1.11032	1.07114						665	1.31474	0.975243	665	9.56589	1.81996
		666	0.677054	0.791192						666	0.82877	1.0059	666	8.61777	3.80985			666	0.677054	0.874655						666	0.82877	1.88115	666	8.61777	1.7133
		667	0.77849	0.783099						667	1.36617	1.35525	667	6.84071	4.62711			667	0.77849	0.936132						667	1.36617	0.944947	667	6.84071	1.2492
		668	0.616155	0.639087						668	0.970512	1.01306	668	14.0056	3.61083			668	0.616155	0.771528						668	0.970512	0.743948	668	14.0056	1.67134
		669	0.620491	0.876131						669	0.878407	0.993223	669	8.33106	4.76363			669	0.620491	0.686659						669	0.878407	1.07299	669	8.33106	1.64942
		670	0.60522	0.680664						670	1.11154	1.13642	670	5.50859	3.61463			670	0.60522	0.792282						670	1.11154	1.28949	670	5.50859	1.20524
		671	0.754922	0.773458						671	1.6674	1.37434	671	10.4626	4.279			671	0.754922	0.928287						671	1.6674	1.04518	671	10.4626	1.63257
		672	0.511326	0.454887						672	0.783255	1.11662	672	1.47118	0.519313			672	0.511326	0.650643						672	0.783255	1.14697	672	1.47118	0.682816
		673	0.776227	0.858636						673	0.781821	0.873118	673	13.3083	4.40383			673	0.776227	0.861675						673	0.781821	0.652952	673	13.3083	1.73804
		674	0.658011	0.92473						674	0.949367	0.92839	674	8.32157	3.3811			674	0.658011	0.760117						674	0.949367	0.692051	674	8.32157	1.49745
		675	0.57411	0.640238						675	0.947754	1.13365	675	3.82919	3.48387			675	0.57411	0.750774						675	0.947754	0.755342	675	3.82919	1.13887
		676	0.680259	0.678839						676	1.22156	1.13043	676	4.40314	3.85039			676	0.680259	0.586598						676	1.22156	0.834619	676	4.40314	1.25822
		677	0.789048	0.77322						677	0.858695	1.06337	677	5.1054	4.28592			677	0.789048	1.00481						677	0.858695	2.17028	677	5.1054	1.2263
		678	1.01096	1.02395						678	1.1248	1.25629	678	8.32443	4.36408			678	1.01096	0.900473						678	1.1248	0.890998	678	8.32443	1.62836
		679	0.485118	0.579142						679	0.922847	0.920063	679	10.3495	4.54193			679	0.485118	0.920656						679	0.922847	1.01548	679	10.3495	1.53072
		680	1.09034	1.18407						680	1.06298	0.948882	680	8.38464	4.88542			680	1.09034	1.07349						680	1.06298	0.703445	680	8.38464	1.29559
		681	1.04452	1.53985						681	0.916396	1.11535	681	5.9951	3.55953			681	1.04452	2.78693						681	0.916396	0.725209	681	5.9951	1.26918
		682	1.06093	0.82293						682	1.44985	1.45305	682	5.09501	4.77114			682	1.06093	1.00574						682	1.44985	1.26087	682	5.09501	1.19028
		683	0.676865	0.791986						683	1.27908	1.34185	683	9.15625	5.33071			683	0.676865	0.849266						683	1.27908	0.915408	683	9.15625	1.70812
		684	0.750397	0.716925						684	0.806192	0.575751	684	9.2428	4.40794			684	0.750397	0.772598						684	0.806192	0.487001	684	9.2428	1.34419
		685	1.04622	1.30317						685	1.22317	1.3547	685	6.51333	4.92469			685	1.04622	1.16307						685	1.22317	1.06656	685	6.51333	1.52138
		686	0.949874	0.813885						686	1.67349	1.45267	686	4.89861	2.26137			686	0.949874	0.898405						686	1.67349	0.92286	686	4.89861	1.31962
		687	0.944972	1.33312						687	0.854932	0.68328	687	1.70736	0.784333			687	0.944972	1.12677						687	0.854932	0.57697	687	1.70736	0.819282
		688	1.08902	0.928221						688	0.850632	0.845533	688	8.37963	4.89505			688	1.08902	1.00602						688	0.850632	0.801785	688	8.37963	1.64305
		689	0.575807	0.653091						689	0.801353	0.663953	689	5.75856	1.96099			689	0.575807	0.753057						689	0.801353	0.590147	689	5.75856	1.15448
		690	0.984754	1.01364						690	1.24127	1.37434	690	12.1219	3.4998			690	0.984754	0.971221						690	1.24127	1.28884	690	12.1219	3.24073
		691	0.917822	0.407795						691	0.98216	1.23172	691	8.78496	4.5189			691	0.917822	0.868665						691	0.98216	0.81156	691	8.78496	1.29051
		692	0.752848	0.778695						692	1.09864	1.41512	692	6.61027	3.28995			692	0.752848	0.887208						692	1.09864	0.874311	692	6.61027	1.3814
		693	1.16312	1.27444						693	1.19271	1.16977	693	10.6964	4.36155			693	1.16312	1.23018						693	1.19271	0.969465	693	10.6964	1.70564
		694	1.07337	1.1323						694	1.03108	1.1441	694	6.19992	2.52861			694	1.07337	1.12035						694	1.03108	1.15097	694	6.19992	1.30666
		695	0.923478	1.13829						695	1.05885	0.705862	695	6.99858	5.03698			695	0.923478	1.04768						695	1.05885	0.761607	695	6.99858	1.3436
		696	1.22194	0.738189						696	0.991657	1.21753	696	8.81525	4.37943			696	1.22194	1.20101						696	0.991657	0.711492	696	8.81525	1.32265
		697	0.980229	1.20093						697	1.14254	1.22843	697	4.94269	3.29708			697	0.980229	0.995684						697	1.14254	1.17835	697	4.94269	1.51425
		698	0.798286	0.706848						698	1.3608	1.5149	698	5.00183	3.92406			698	0.798286	0.957457						698	1.3608	0.898991	698	5.00183	1.27172
		699	0.593907	0.678839						699	0.71982	0.954639	699	8.62046	3.50697			699	0.593907	0.742858						699	0.71982	0.637885	699	8.62046	1.43686
		700	1.02473	1.27337						700	1.36295	1.43383	700	7.9949	3.63276			700	1.02473	1.11514						700	1.36295	0.798653	700	7.9949	1.37946
		701	0.805828	0.755209						701	0.947038	0.722618	701	5.93847	6.29258			701	0.805828	0.780942						701	0.947038	0.901421	701	5.93847	1.55869
		702	1.02944	0.872124						702	0.95994	1.01327	702	4.3501	3.55223			702	1.02944	0.917447						702	0.95994	0.854006	702	4.3501	1.37157
		703	1.11409	0.737277						703	0.803683	0.978043	703	5.30252	4.99267			703	1.11409	0.983488						703	0.803683	0.916596	703	5.30252	1.49475
		704	0.958547	1.21914						704	1.15634	0.658848	704	6.47946	4.32851			704	0.958547	1.18218						704	1.15634	0.675472	704	6.47946	1.35208
		705	1.18536	1.49491						705	1.03771	1.19454	705	7.46646	4.5776			705	1.18536	1.26284						705	1.03771	0.860973	705	7.46646	1.40414
		706	0.836938	1.17903						706	1.4219	1.54718	706	5.60876	5.85335			706	0.836938	1.02328						706	1.4219	2.74865	706	5.60876	1.41397
		707	0.970614	0.914852						707	1.93189	1.71639	707	4.03562	2.90086			707	0.970614	1.05809						707	1.93189	1.32497	707	4.03562	1.38718
		708	1.22043	1.46765						708	1.16691	1.28617	708	6.95038	4.46825			708	1.22043	1.37132						708	1.16691	1.25514	708	6.95038	1.40813
		709	1.08883	0.893151						709	1.18931	1.08242	709	0.604599	0.524145			709	1.08883	0.905323						709	1.18931	0.85433	709	0.604599	0.660081
		710	1.25984	1.25354						710	1.11584	0.953097	710	4.97817	4.59867			710	1.25984	1.28602						710	1.11584	0.761607	710	4.97817	1.38059
		711	1.09713	1.06307						711	1.01531	1.12693	711	6.70524	4.06425			711	1.09713	0.961237						711	1.01531	0.944461	711	6.70524	1.34338
		712	1.23325	1.26512						712	1.20615	0.903684	712	6.69754	3.50683			712	1.23325	1.18611						712	1.20615	0.877606	712	6.69754	1.42763
		713	1.14256	1.24398						713	1.09702	1.14712	713	8.61437	5.19635			713	1.14256	1.13732						713	1.09702	1.3159	713	8.61437	2.2508
		714	1.4365	1.33895						714	1.26564	1.36567	714	6.84197	3.92242			714	1.4365	1.37353						714	1.26564	1.13968	714	6.84197	1.60055
		715	0.985509	1.30999						715	1.08968	1.38818	715	2.93824	2.39134			715	0.985509	1.08547						715	1.08968	0.938035	715	2.93824	1.09302
		716	1.06545	1.16039						716	1.62475	1.11367	716	4.07755	2.68775			716	1.06545	1.1319						716	1.62475	0.961256	716	4.07755	1.21572
		717	0.69949	0.808529						717	1.95966	1.95475	717	12.6125	6.44154			717	0.69949	1.13518						717	1.95966	1.03238	717	12.6125	2.18162
		718	1.35467	1.338						718	0.604778	0.775115	718	8.01998	4.17469			718	1.35467	1.37146						718	0.604778	0.654788	718	8.01998	1.56517
		719	0.889918	0.862166						719	1.38982	1.54739	719	6.76635	4.76051			719	0.889918	0.91709						719	1.38982	0.971247	719	6.76635	1.5149
		720	1.1716	1.3215						720	1.24307	1.2628	720	5.91894	3.25154			720	1.1716	1.03512						720	1.24307	0.898937	720	5.91894	1.26022
		721	1.11315	1.18478						721	1.67474	1.3216	721	0.213599	0.0226846			721	1.11315	1.2284						721	1.67474	1.08352	721	0.213599	0.033644
		722	0.928569	0.572516						722	0.530054	0.601965	722	7.28583	3.73196			722	0.928569	0.989978						722	0.530054	0.89251	722	7.28583	1.49535
		723	1.26549	1.51613						723	0.83988	0.989214	723	6.46423	4.28746			723	1.26549	1.15957						723	0.83988	0.784342	723	6.46423	1.41861
		724	1.10787	0.843005						724	1.00814	0.687872	724	6.3094	4.20519			724	1.10787	1.13497						724	1.00814	0.805943	724	6.3094	1.37227
		725	0.618983	0.839236						725	0.83988	1.05357	725	4.47572	3.50289			725	0.618983	1.09867						725	0.83988	0.754748	725	4.47572	1.25649
		726	1.0909	0.801507						726	0.964957	0.963651	726	1.62941	0.162116			726	1.0909	0.924864						726	0.964957	1.08449	726	1.62941	0.327907
		727	1.04452	1.03034						727	0.900627	0.885043	727	7.32955	4.12757			727	1.04452	1.13525						727	0.900627	0.736765	727	7.32955	1.47013
		728	0.996821	1.3361						728	1.01674	1.05295	728	6.51655	2.99468			728	0.996821	0.929642						728	1.01674	0.75653	728	6.51655	1.16447
		729	0.759824	0.806347						729	0.605495	0.725496	729	5.99241	4.19491			729	0.759824	0.913952						729	0.605495	0.621522	729	5.99241	1.24623
		730	0.773776	1.37176						730	1.00313	1.16997	730	4.39347	2.89643			730	0.773776	1.12712						730	1.00313	1.96674	730	4.39347	1.12354
		731	1.68198	1.71739						731	0.911737	1.07409	731	2.32002	2.67425			731	1.68198	1.46803						731	0.911737	0.929233	731	2.32002	1.1035
		732	0.642362	0.590448						732	1.2703	1.68151	732	6.93748	5.30083			732	0.642362	0.684163						732	1.2703	1.12915	732	6.93748	1.4643
		733	1.04528	0.886803						733	1.12874	1.15578	733	5.4826	4.78618			733	1.04528	0.980279						733	1.12874	0.856166	733	5.4826	1.26168
		734	0.528672	0.540064						734	0.992553	1.14434	734	7.47936	4.18579			734	0.528672	0.785792						734	0.992553	1.91484	734	7.47936	1.3794
		735	0.978533	1.14888						735	1.07516	1.01101	735	6.5635	3.09052			735	0.978533	1.01187						735	1.07516	1.30985	735	6.5635	1.11549
		736	0.799606	0.711728						736	0.903852	0.957311	736	0.638287	0.51921			736	0.799606	0.851548						736	0.903852	0.862809	736	0.638287	0.807131
		737	0.633124	0.590885						737	1.25471	1.40878	737	4.29222	4.17637			737	0.633124	0.706343						737	1.25471	2.32494	737	4.29222	1.17873
		738	1.06526	0.70534						738	0.915141	0.607756	738	6.7624	3.97765			738	1.06526	1.24908						738	0.915141	0.597815	738	6.7624	1.36466
		739	0.963072	1.11083						739	0.937003	1.04521	739	7.96605	3.6977			739	0.963072	1.07955						739	0.937003	0.732985	739	7.96605	1.31147
		740	1.07488	1.0297						740	1.09021	1.00066	740	4.30351	3.1008			740	1.07488	1.01594						740	1.09021	1.00921	740	4.30351	1.06807
		741	0.640854	0.78786						741	1.50164	0.591753	741	5.55733	4.14943			741	0.640854	1.08448						741	1.50164	0.70863	741	5.55733	1.25287
		742	0.970614	1.25961						742	0.875539	0.797457	742	4.09188	4.4699			742	0.970614	1.10723						742	0.875539	0.764469	742	4.09188	1.17592
		743	1.30245	1.27833						743	1.55199	1.66776	743	7.37722	3.60069			743	1.30245	1.32653						743	1.55199	1.2404	743	7.37722	1.28085
		744	1.00681	0.643887						744	1.53551	1.76594	744	3.05758	2.08616			744	1.00681	0.910957						744	1.53551	1.23613	744	3.05758	0.967791
		745	1.41972	1.15142						745	1.99496	2.60222	745	4.92191	3.79621			745	1.41972	1.1968						745	1.99496	3.73599	745	4.92191	1.14681
		746	0.827133	0.935521						746	1.43194	1.25331	746	4.66566	3.88716			746	0.827133	0.872587						746	1.43194	1.05263	746	4.66566	1.28371
		747	1.31018	1.38176						747	1.37477	1.57853	747	3.12782	4.10023			747	1.31018	1.1911						747	1.37477	1.50264	747	3.12782	1.27917
		748	1.23966	1.04244						748	1.32711	1.64186	748	8.25544	5.05147			748	1.23966	0.942836						748	1.32711	1.74419	748	8.25544	1.32842
		749	1.15369	1.24342						749	2.3417	0.228045						749	1.15369	1.00146						749	2.3417	0.553695
		750	0.765292	0.812139						750	1.2703	1.09678						750	0.765292	1.03519						750	1.2703	0.954938
		751	1.11466	0.946233						751	0.365734	0.0267966						751	1.11466	1.01251						751	0.365734	0.0983398
		752	1.15048	1.23525						752	0.276316	0.0314912						752	1.15048	0.932923						752	0.276316	0.0572974
		753	0.991353	1.13793						753	0.783255	0.718643						753	0.991353	0.899617						753	0.783255	0.955748
		754	0.670832	0.82785						754	1.15938	1.24913						754	0.670832	1.021						754	1.15938	0.927504
		755	0.997575	1.07049						755	0.933061	0.828194						755	0.997575	1.13419						755	0.933061	0.798545
		756	1.58262	1.44595						756	1.1911	0.0941994						756	1.58262	1.05937						756	1.1911	0.324667
		757	1.47741	1.23358						757	0.637212	0.702503						757	1.47741	1.07791						757	0.637212	0.974163
		758	0.833544	0.926992						758	1.01818	1.18515						758	0.833544	0.930498						758	1.01818	1.04313
		759	1.14407	1.02649						759	1.59769	1.52285						759	1.14407	0.989122						759	1.59769	1.44107
		760	0.72023	0.731286						760	1.57332	0.514859						760	0.72023	0.959525						760	1.57332	0.557259
		761	1.22665	0.835824						761	1.45792	1.17754						761	1.22665	0.981277						761	1.45792	1.04431
		762	0.957039	0.892595						762	0.683982	0.173698						762	0.957039	0.920799						762	0.683982	0.551426
		763	1.4069	1.32642						763	0.890054	0.749997						763	1.4069	1.30342						763	0.890054	1.45063
		764	1.30773	1.17066						764	1.12928	1.2003						764	1.30773	1.04318						764	1.12928	2.21175
		765	0.801303	0.762905						765	1.30112	1.30224						765	0.801303	0.830438						765	1.30112	1.22096
		766	0.668004	0.647696						766	1.1162	1.33853						766	0.668004	0.784223						766	1.1162	1.22177
		767	1.06262	0.758303						767	1.07211	1.275						767	1.06262	0.997181						767	1.07211	1.23926
		768	1.25267	1.00086						768	1.3608	1.7353						768	1.25267	0.828298						768	1.3608	2.89446
		769	0.970425	0.765286						769	1.20042	1.53755						769	0.970425	0.88464						769	1.20042	2.83581
		770	0.708918	0.44477						770	1.01603	0.842141						770	0.708918	0.811324						770	1.01603	0.900719
		771	1.17499	1.18494						771	0.8087	0.640069						771	1.17499	0.958313						771	0.8087	0.793577
		772	0.80036	1.01165						772	1.25113	1.22305						772	0.80036	0.900045						772	1.25113	0.825924
		773	0.965523	0.817455						773	1.56741	1.54201						773	0.965523	0.856255						773	1.56741	1.0401
		774	0.779809	1.00241						774	0.125615	0.044444						774	0.779809	0.97279						774	0.125615	0.068638
		775	0.919519	0.984517						775	1.17802	1.25646						775	0.919519	0.889062						775	1.17802	1.06899
		776	1.1633	0.910289						776	0.804041	0.797868						776	1.1633	0.949255						776	0.804041	0.725587
		777	1.45724	1.18732						777	1.1859	1.20647						777	1.45724	1.02878						777	1.1859	1.04534
		778	1.16161	0.590647						778	0.972125	0.961389						778	1.16161	0.957956						778	0.972125	0.953912
		779	0.837503	0.84237						779	0.924459	1.05206						779	0.837503	0.780728						779	0.924459	0.777322
		780	1.15953	0.919454						780	1.21224	0.853689						780	1.15953	0.953891						780	1.21224	0.857246
		781	1.56414	1.23303						781	0.800457	0.781111						781	1.56414	0.979708						781	0.800457	0.700367
		782	0.480782	0.571366						782	0.861025	0.878875						782	0.480782	0.796133						782	0.861025	0.842071
		783	0.785277	0.87502						783	0.855828	0.816235						783	0.785277	0.787432						783	0.855828	0.792821
		784	1.0317	1.1392						784	0.940408	0.830935						784	1.0317	1.08497						784	0.940408	0.853466
		785	1.07789	0.829952						785	0.987177	1.22757						785	1.07789	0.88193						785	0.987177	1.91733
		786	1.11409	1.10088						786	0.983772	0.889669						786	1.11409	0.962378						786	0.983772	0.779698
		787	0.994747	1.31023						787	0.716774	0.600902						787	0.994747	1.08747						787	0.716774	0.636373
		788	1.63108	1.58699						788	1.16153	1.24745						788	1.63108	1.1416						788	1.16153	1.04685
		789	1.16783	1.41143						789	1.40524	1.37574						789	1.16783	1.0506						789	1.40524	1.01834
		790	1.2917	1.35641						790	1.02732	1.26472						790	1.2917	1.03919						790	1.02732	1.68198
		791	0.69176	0.59632						791	1.03251	0.0382417						791	0.69176	0.861747						791	1.03251	0.24161
		792	0.901607	1.24564						792	0.678964	0.0267624						792	0.901607	1.01658						792	0.678964	0.150075
		793	0.935356	0.775164						793	0.721612	0.88703						793	0.935356	0.843917						793	0.721612	1.44151
		794	0.659331	0.762826						794	0.897043	0.202003						794	0.659331	0.822022						794	0.897043	0.155907
		795	0.52754	0.211654						795	0.969258	0.825898						795	0.52754	0.571907						795	0.969258	1.08606
		796	1.13747	1.33022						796	1.16064	1.26914						796	1.13747	0.948185						796	1.16064	0.857732
		797	0.620869	0.830349						797	0.788093	0.694074						797	0.620869	0.858894						797	0.788093	0.563361
		798	0.709106	0.980867						798	1.06907	1.03085						798	0.709106	1.10445						798	1.06907	0.940249
		799	1.10957	1.36637						799	0.779671	0.718266						799	1.10957	1.07399						799	0.779671	0.665481
		800	0.659143	0.793929						800	1.13877	1.08602						800	0.659143	0.883499						800	1.13877	0.967521
		801	0.600695	0.593027						801	0.899193	0.902587						801	0.600695	0.756195						801	0.899193	0.869127
		802	1.38182	1.44262						802	0.931806	0.986781						802	1.38182	1.1871						802	0.931806	0.757502
		803	1.19686	1.67316						803	1.20454	0.774087						803	1.19686	1.0879						803	1.20454	0.78796
		804	0.95176	1.28095						804	0.760139	0.735365						804	0.95176	1.13055						804	0.760139	0.65225
		805	0.940636	1.45924						805	0.795798	0.752362						805	0.940636	0.923794						805	0.795798	0.742544
		806	0.624828	0.8945						806	1.33248	1.6751						806	0.624828	0.73216						806	1.33248	3.67729
		807	0.71118	0.712323						807	0.813897	0.753184						807	0.71118	0.878007						807	0.813897	0.745136
		808	0.946292	1.02113						808	0.915141	0.750408						808	0.946292	0.973646						808	0.915141	0.776458
		809	0.483233	0.432948						809	0.99327	0.833368						809	0.483233	0.661554						809	0.99327	0.724399
		810	0.776981	0.815392						810	0.679323	0.543848						810	0.776981	0.815889						810	0.679323	0.626545
		811	1.06243	1.09298						811	1.10025	1.21997						811	1.06243	0.903183						811	1.10025	1.01715
		812	1.05282	1.21252						812	0.637391	0.101395						812	1.05282	0.972576						812	0.637391	0.360417
		813	0.7487	0.832848						813	0.871239	0.559919						813	0.7487	0.759119						813	0.871239	0.446768
		814	0.996255	0.914177						814	1.72133	1.53659						814	0.996255	0.864599						814	1.72133	0.917514
		815	0.934414	0.950121						815	1.33177	1.38667						815	0.934414	0.79706						815	1.33177	1.05884
		816	0.776793	0.804641						816	0.825544	0.816475						816	0.776793	0.760474						816	0.825544	0.750266
		817	1.58828	1.49582						817	1.36993	1.33699						817	1.58828	1.34636						817	1.36993	0.963903
		818	0.713065	0.868514						818	1.2583	1.46271						818	0.713065	0.909459						818	1.2583	1.29969
		819	0.711934	0.810632						819	1.17802	1.18433						819	0.711934	0.68944						819	1.17802	0.911358
		820	0.470789	0.440803						820	0.932702	1.00254						820	0.470789	0.736939						820	0.932702	0.957476
		821	0.988337	0.964562						821	1.33445	1.44085						821	0.988337	0.937701						821	1.33445	1.29338
		822	0.941013	0.533121						822	1.32908	1.48875						822	0.941013	0.771671						822	1.32908	0.847148
		823	0.636517	0.182098						823	1.48713	1.61835						823	0.636517	0.7808						823	1.48713	0.802541
		824	0.458157	0.463059						824	1.00976	1.05758						824	0.458157	0.502371						824	1.00976	0.829165
		825	1.53567	0.4775						825	0.636137	0.0244665						825	1.53567	1.15358						825	0.636137	0.159795
		826	1.04094	0.844869						826	0.674126	0.814453						826	1.04094	1.01437						826	0.674126	1.36272
		827	0.977213	0.741562						827	2.03116	1.85414						827	0.977213	0.900402						827	2.03116	1.32956
		828	0.826945	0.907155						828	1.17712	1.14756						828	0.826945	0.975215						828	1.17712	0.835969
		829	1.17876	0.979756						829	1.21332	1.01029						829	1.17876	1.11422						829	1.21332	0.909629
		830	0.700433	0.724026						830	0.823753	0.177776						830	0.700433	0.754982						830	0.823753	0.165304
		831	1.2193	0.810275						831	1.06118	1.12556						831	1.2193	1.07014						831	1.06118	1.26864
		832	0.655372	0.654321						832	0.943991	0.833334						832	0.655372	0.944905						832	0.943991	1.09659
		833	0.897837	0.888866						833	1.21941	1.31667						833	0.897837	0.847269						833	1.21941	0.84461
		834	0.476257	0.513563						834	1.9817	2.03127						834	0.476257	0.723388						834	1.9817	1.03891
		835	0.931963	0.894579						835	1.43498	1.65622						835	0.931963	1.05338						835	1.43498	0.95915
		836	1.15143	0.82904						836	1.29306	1.3471						836	1.15143	1.03448						836	1.29306	0.88684
		837	0.645379	0.612863						837	0.578078	0.647642						837	0.645379	0.891629						837	0.578078	0.898127
		838	0.588251	0.633969						838	0.790781	0.706478						838	0.588251	0.724886						838	0.790781	0.580534
		839	1.17386	1.02086						839	0.9465	1.00844						839	1.17386	1.08726						839	0.9465	1.11284
		840	1.09015	0.814044						840	0.828949	0.876784						840	1.09015	0.853545						840	0.828949	0.697829
		841	0.894066	0.676498						841	0.982697	1.08136						841	0.894066	0.84085						841	0.982697	0.728827
		842	0.890483	0.783853						842	0.998108	1.14773						842	0.890483	0.731019						842	0.998108	1.00792
		843	0.868613	0.820629						843	3.035	0.347774						843	0.868613	0.829083						843	3.035	0.697667
		844	0.604654	0.708316						844	1.06298	1.3312						844	0.604654	0.736653						844	1.06298	0.841369
		845	0.659143	0.819756						845	1.05581	1.28514						845	0.659143	0.870876						845	1.05581	0.704795
		846	0.916314	0.776235						846	0.384012	0.417746						846	0.916314	0.742216						846	0.384012	0.384827
		847	1.19008	0.462742						847	0.891129	0.915403						847	1.19008	0.897406						847	0.891129	0.710412
		848	1.21063	0.81567						848	1.01746	1.26595						848	1.21063	0.915236						848	1.01746	0.817608
		849	1.24004	0.782345						849	0.765335	0.891039						849	1.24004	0.78244						849	0.765335	0.786178
		850	1.00436	0.861294						850	0.763544	1.00035						850	1.00436	0.923366						850	0.763544	0.761445
		851	0.774907	0.782028						851	1.28105	0.977837						851	0.774907	0.878293						851	1.28105	1.11711
		852	1.36278	1.01328						852	0.867297	0.944804						852	1.36278	0.991547						852	0.867297	0.723264
		853	0.844668	1.15447						853	0.849915	1.01145						853	0.844668	1.02172						853	0.849915	0.685894
		854	1.01417	0.934093						854	1.65431	1.21424						854	1.01417	0.907391						854	1.65431	1.05938
		855	0.992296	1.01752						855	1.66668	1.69874						855	0.992296	0.874584						855	1.66668	0.978267
		856	0.779998	0.455403						856	1.28697	1.28538						856	0.779998	0.768533						856	1.28697	0.722994
		857	0.638969	0.804958						857	1.09631	1.23234						857	0.638969	0.733159						857	1.09631	0.877282
		858	0.69572	0.704666						858	0.865325	0.769701						858	0.69572	0.788074						858	0.865325	0.721266
		859	1.0202	1.05176						859	1.39914	1.45466						859	1.0202	0.833718						859	1.39914	0.903851
		860	0.591645	0.750647						860	0.86658	0.946449						860	0.591645	0.785008						860	0.86658	0.704795
		861	0.602014	0.75628						861	0.889875	1.03996						861	0.602014	1.0011						861	0.889875	0.921456
		862	0.418752	0.550855						862	0.712294	0.696987						862	0.418752	0.646791						862	0.712294	0.758259
		863	1.31074	1.23521						863	1.2746	1.38136						863	1.31074	1.12313						863	1.2746	1.32038
		864	0.694777	0.845464						864	1.10061	1.39966						864	0.694777	0.827728						864	1.10061	1.33431
		865	1.18631	1.31412						865	0.882707	1.00559						865	1.18631	1.03527						865	0.882707	0.759609
		866	0.537533	0.401844						866	0.937899	0.989693						866	0.537533	0.621758						866	0.937899	0.868425
		867	0.339564	0.531733						867	0.931985	0.931337						867	0.339564	0.57262						867	0.931985	0.676714
		868	0.786785	1.0428						868	1.63944	1.36886						868	0.786785	1.04739						868	1.63944	1.44934
		869	0.617852	0.572397						869	0.821602	0.938156						869	0.617852	0.664122						869	0.821602	0.68881
		870	0.69949	1.06934						870	1.15329	1.08067						870	0.69949	0.890346						870	1.15329	1.20891
		871	0.783957	0.792065						871	1.04004	0.935826						871	0.783957	0.782583						871	1.04004	0.753452
		872	0.581275	0.7612						872	1.70682	1.9432						872	0.581275	0.741574						872	1.70682	1.59979
		873	0.820157	0.740173						873	0.70871	0.813185						873	0.820157	0.796775						873	0.70871	0.661701
		874	0.98268	0.972298						874	0.487944	0.590074						874	0.98268	0.908104						874	0.487944	0.477766
		875	0.640665	1.10405						875	0.872672	0.955769						875	0.640665	0.798273						875	0.872672	0.895265
		876	0.541115	1.17526						876	1.31904	1.63603						876	0.541115	0.840422						876	1.31904	1.76655
		877	0.850513	0.941631						877	1.67277	1.21647						877	0.850513	0.790713						877	1.67277	1.09043
		878	0.793196	0.753939						878	1.0094	1.12885						878	0.793196	0.699639						878	1.0094	0.92286
		879	1.21647	2.61637						879	1.09864	1.04764						879	1.21647	0.924222						879	1.09864	0.78418
		880	1.02473	1.14781						880	1.01191	0.930583						880	1.02473	0.921726						880	1.01191	0.933715
		881	0.692703	0.770761						881	0.820706	1.01152						881	0.692703	0.749348						881	0.820706	2.28995
		882	0.759824	0.854549						882	1.10777	1.01628						882	0.759824	0.75541						882	1.10777	0.875283
		883	0.829584	0.611872						883	1.37639	1.69956						883	0.829584	0.741717						883	1.37639	2.97142
		884	0.908961	1.00051						884	1.38194	1.2223						884	0.908961	0.818955						884	1.38194	1.16641
		885	1.00625	1.16431						885	1.14182	1.2824						885	1.00625	0.84463						885	1.14182	1.33037
		886	0.630484	0.135403						886	0.811388	0.906802						886	0.630484	0.449595						886	0.811388	0.808535
		887	0.714951	0.853716						887	1.28285	1.45651						887	0.714951	0.813178						887	1.28285	1.64472
		888	0.753413	0.844472						888	1.11691	1.19461						888	0.753413	0.692578						888	1.11691	0.826789
		889	0.874457	1.03244						889	0.836296	0.928356						889	0.874457	0.907747						889	0.836296	0.763767
		890	0.405177	0.634326						890	0.814076	0.9104						890	0.405177	0.712405						890	0.814076	0.825816
		891	0.882376	0.581086						891	0.859054	0.910126						891	0.882376	0.760189						891	0.859054	0.670881
		892	1.0004	1.16737						892	0.740069	0.529902						892	1.0004	1.04104						892	0.740069	0.511356
		893	0.507555	0.587989						893	1.28213	0.190797						893	0.507555	0.650001						893	1.28213	0.304362
		894	0.874269	0.926158						894	0.801712	0.912456						894	0.874269	0.873586						894	0.801712	0.827923
		895	0.623697	0.667969						895	0.68219	0.770626						895	0.623697	0.748207						895	0.68219	0.716082
		896	1.08035	2.6055						896	1.1067	0.937505						896	1.08035	0.971863						896	1.1067	0.768843
		897	0.663479	0.748227						897	0.892025	0.958648						897	0.663479	0.719323						897	0.892025	0.803999
		898	0.507743	0.58656						898	0.915679	1.01954						898	0.507743	0.584031						898	0.915679	0.763227
		899	0.566757	0.673959						899	0.942737	0.997027						899	0.566757	0.772099						899	0.942737	0.720186
		900	0.65688	0.617703						900	0.832891	0.776623						900	0.65688	0.667474						900	0.832891	0.781318
		901	1.1748	0.823049						901	1.15221	1.45672						901	1.1748	0.876652						901	1.15221	0.899099
		902	0.661594	0.689551						902	0.711577	0.845122						902	0.661594	0.75812						902	0.711577	0.927558
		903	0.688555	0.754415						903	0.743653	0.870856						903	0.688555	0.82138						903	0.743653	0.959204
		904	0.595227	0.730017						904	1.21637	1.02047						904	0.595227	0.886352						904	1.21637	0.843206
		905	0.609179	0.56728						905	1.12838	0.599326						905	0.609179	0.564632						905	1.12838	0.651818
		906	0.687235	0.612982						906	1.061	0.991612						906	0.687235	0.638946						906	1.061	0.676822
		907	1.02661	0.8363						907	1.02284	1.09236						907	1.02661	0.995612						907	1.02284	0.740275
		908	0.683464	0.523679						908	1.26421	1.37811						908	0.683464	0.758762						908	1.26421	0.893104
		909	0.497562	0.701135						909	0.652444	0.716313						909	0.497562	0.755054						909	0.652444	0.731311
		910	0.518302	0.63151						910	0.760676	0.930789						910	0.518302	0.881003						910	0.760676	1.66648
		911	0.638026	0.225182						911	0.975888	0.95457						911	0.638026	0.531326						911	0.975888	0.675256
		912	1.05376	1.02153						912	0.890592	0.945489						912	1.05376	1.01323						912	0.890592	1.01515
		913	0.518113	0.434416						913	1.30811	1.53402						913	0.518113	0.675248						913	1.30811	3.60244
		914	0.569962	0.633731						914	1.08681	1.07745						914	0.569962	0.800198						914	1.08681	1.17365
		915	0.855226	0.860421						915	0.775908	1.08537						915	0.855226	0.744284						915	0.775908	1.09686
		916	0.927249	0.931951						916	1.5692	1.26681						916	0.927249	0.89926						916	1.5692	0.930529
		917	1.01624	0.966545						917	0.755121	0.839057						917	1.01624	1.03063						917	0.755121	0.609264
		918	1.66822	1.60222						918	0.950084	0.934798						918	1.66822	1.37824						918	0.950084	0.649928
		919	1.01549	1.35228						919	1.15759	1.09167						919	1.01549	1.24915						919	1.15759	0.750968
		920	1.1239	1.30297						920	0.792752	1.0378						920	1.1239	1.09118						920	0.792752	2.01437
		921	0.677997	0.848281						921	0.869984	1.08074						921	0.677997	0.820596						921	0.869984	0.71538
		922	0.611064	0.219906						922	0.852961	0.83539						922	0.611064	0.904538						922	0.852961	0.897749
		923	0.779621	0.782543						923	1.06316	1.26592						923	0.779621	0.775023						923	1.06316	0.867777
		924	1.31093	0.873354						924	0.925714	1.07985						924	1.31093	1.02592						924	0.925714	0.672393
		925	1.8149	1.58151						925	1.01334	0.933633						925	1.8149	1.1702						925	1.01334	0.639398
		926	1.19498	1.07255						926	1.47333	1.46497						926	1.19498	1.07592						926	1.47333	1.19342
		927	1.14501	1.20887						927	0.653519	0.0966666						927	1.14501	0.969724						927	0.653519	0.358743
		928	0.51076	0.416285						928	0.799741	0.548817						928	0.51076	0.704061						928	0.799741	0.431917
		929	1.35788	1.10215						929	1.25597	1.41892						929	1.35788	0.919016						929	1.25597	1.01191
		930	1.56923	1.36656						930	1.73316	1.57483						930	1.56923	1.10024						930	1.73316	0.900935
		931	0.926306	1.45345						931	0.82877	0.64891						931	0.926306	1.86121						931	0.82877	0.55283
		932	0.961564	0.771554						932	0.75996	0.608304						932	0.961564	0.810968						932	0.75996	0.563361
		933	0.681013	0.779925						933	0.754225	0.820039						933	0.681013	0.994186						933	0.754225	0.753398
		934	1.54435	1.61285						934	1.22783	1.42879						934	1.54435	1.21955						934	1.22783	1.2903
		935	1.23665	1.47995						935	0.932523	1.2443						935	1.23665	1.16321						935	0.932523	0.802757
		936	0.906321	1.15328						936	1.10975	1.15366						936	0.906321	1.01266						936	1.10975	0.927396
		937	0.477577	0.707403						937	0.964419	1.05483						937	0.477577	0.968654						937	0.964419	1.03022
		938	1.60317	1.21609						938	0.977501	1.15883						938	1.60317	0.982062						938	0.977501	0.681628
		939	1.44348	1.7212						939	1.18196	1.36728						939	1.44348	1.27183						939	1.18196	1.21631
		940	0.666307	0.72605						940	0.948292	0.696918						940	0.666307	0.708625						940	0.948292	0.728935
		941	1.65389	1.74814						941	1.33768	1.56596						941	1.65389	1.22612						941	1.33768	0.879604
		942	1.5583	2.02422						942	0.707635	0.918727						942	1.5583	1.30528						942	0.707635	0.610344
		943	1.28171	1.4684						943	1.49591	1.58402						943	1.28171	1.09574						943	1.49591	0.813612
		944	0.984189	0.735293						944	1.00528	1.00919						944	0.984189	0.96302						944	1.00528	0.81453
		945	1.13201	1.07315						945	0.812105	1.05984						945	1.13201	1.16321						945	0.812105	0.916704
		946	0.955907	1.037						946	1.06172	0.647814						946	0.955907	0.887992						946	1.06172	0.610668
		947	0.778301	1.28345						947	0.997212	1.0363						947	0.778301	0.902898						947	0.997212	0.818094
		948	0.603523	0.860143						948	1.00241	1.15787						948	0.603523	0.82459						948	1.00241	0.801947
		949	1.00417	1.3351						949	2.00016	1.86226						949	1.00417	1.05638						949	2.00016	1.37087
		950	0.953645	1.28357						950	1.13537	1.34819						950	0.953645	1.07185						950	1.13537	1.21216
		951	0.675169	0.720337						951	1.17551	1.13029						951	0.675169	0.778018						951	1.17551	0.832027
		952	0.95553	1.04629						952	1.06531	0.996307						952	0.95553	0.971863						952	1.06531	0.722778
		953	0.756807	0.915129						953	0.949188	1.1038						953	0.756807	0.886994						953	0.949188	0.893914
		954	0.74606	0.89926						954	1.03878	1.14345						954	0.74606	0.891772						954	1.03878	1.28484
		955	0.683087	0.925206						955	1.16852	0.948505						955	0.683087	0.857895						955	1.16852	0.864159
		956	0.826756	0.970433						956	1.20131	1.39312						956	0.826756	0.851191						956	1.20131	1.10831
		957	0.977967	1.22874						957	1.14272	1.50695						957	0.977967	1.08055						957	1.14272	0.941437
		958	0.387265	0.631073						958	1.57045	1.21983						958	0.387265	0.666333						958	1.57045	0.971031
		959	0.724567	0.911837						959	1.99424	2.07886						959	0.724567	0.853046						959	1.99424	1.03168
		960	0.738519	0.85812						960	0.625744	0.757296						960	0.738519	0.791854						960	0.625744	0.637345
		961	1.01285	1.5447						961	1.2583	1.35635						961	1.01285	0.902398						961	1.2583	0.865887
		962	0.983812	1.02371						962	1.45756	1.68017						962	0.983812	0.974359						962	1.45756	0.987394
		963	0.640665	0.859588						963	1.59213	1.33315						963	0.640665	0.731376						963	1.59213	1.00073
		964	1.08185	1.14817						964	0.544569	0.643736						964	1.08185	1.05873						964	0.544569	0.88063
		965	1.1024	1.1782						965	0.938616	0.643153						965	1.1024	1.03755						965	0.938616	0.769113
		966	0.738896	1.4471						966	0.810134	1.09356						966	0.738896	0.835644						966	0.810134	0.738331
		967	0.996255	1.0105						967	0.832354	1.03893						967	0.996255	0.856754						967	0.832354	0.786772
		968	0.626713	1.30785						968	0.902418	0.990687						968	0.626713	0.852047						968	0.902418	1.09475
		969	1.0745	1.10131						969	0.830383	0.847418						969	1.0745	0.872017						969	0.830383	0.705605
		970	0.934414	4.37693						970	0.955818	1.14335						970	0.934414	0.976428						970	0.955818	0.741086
		971	0.749831	0.800991						971	0.522528	0.699282						971	0.749831	0.731875						971	0.522528	0.590579
		972	0.855603	0.848559						972	0.978755	1.20544						972	0.855603	0.754697						972	0.978755	1.91555
		973	0.726263	0.853756						973	0.983056	1.13642						973	0.726263	0.974502						973	0.983056	0.912438
		974	0.851455	0.856771						974	1.01907	1.17634						974	0.851455	0.775094						974	1.01907	1.0279
		975	0.735691	0.200069						975	1.33159	0.869965						975	0.735691	0.600648						975	1.33159	0.798437
		976	0.806205	1.1634						976	1.52171	0.940658						976	0.806205	0.921797						976	1.52171	0.877066
		977	1.05697	1.20736						977	1.10043	1.43317						977	1.05697	0.960024						977	1.10043	0.885544
		978	0.479085	0.693677						978	2.89147	0.313336						978	0.479085	0.742501						978	2.89147	0.657111
		979	0.16554	0.126159						979	0.729676	0.72601						979	0.16554	0.230574						979	0.729676	0.860865
		980	0.771325	1.03371						980	1.0542	1.28134						980	0.771325	0.816031						980	1.0542	0.701177
		981	0.605031	0.657455						981	1.1601	1.41309						981	0.605031	0.700637						981	1.1601	0.795305
		982	1.11786	1.09624						982	0.955997	1.20259						982	1.11786	0.923295						982	0.955997	0.96077
		983	0.724189	0.739022						983	0.846152	0.922976						983	0.724189	0.797774						983	0.846152	0.713544
		984	0.824305	3.63576						984	1.05832	1.37896						984	0.824305	0.917661						984	1.05832	0.848984
		985	0.723624	0.730929						985	0.823215	0.839639						985	0.723624	0.707199						985	0.823215	0.709386
		986	0.849381	0.833047						986	0.749029	0.969921						986	0.849381	0.790856						986	0.749029	0.749132
		987	0.805074	0.789843						987	0.799382	0.89265						987	0.805074	0.748064						987	0.799382	0.817662
		988	1.25493	1.20744						988	1.26779	0.989042						988	1.25493	1.03555						988	1.26779	1.10728
		989	0.820534	1.25675						989	0.83092	0.990893						989	0.820534	0.932923						989	0.83092	0.723913
		990	0.896705	0.841259						990	1.29485	1.67719						990	0.896705	0.799485						990	1.29485	1.46991
		991	0.56506	0.691733						991	1.19164	1.36029						991	0.56506	0.868451						991	1.19164	1.24861
		992	0.794139	0.76473						992	0.818914	1.03623						992	0.794139	0.764824						992	0.818914	0.679792
		993	1.04245	1.03395						993	1.56382	1.24543						993	1.04245	0.960095						993	1.56382	1.08352
		994	0.613327	0.228991						994	0.914783	1.19087						994	0.613327	0.556074						994	0.914783	0.857678
		995	1.09128	1.05355						995	1.42889	1.60667						995	1.09128	0.949826						995	1.42889	0.964551
		996	0.514531	0.698953						996	1.43606	1.62514						996	0.514531	0.80569						996	1.43606	0.947648
		997	1.15293	1.16729						997	1.61328	1.77941						997	1.15293	0.928573						997	1.61328	0.979132
		998	1.07695	1.15991						998	1.2316	1.29402						998	1.07695	1.02407						998	1.2316	0.7224
		999	1.10957	1.17784						999	1.13519	1.24728						999	1.10957	1.06486						999	1.13519	0.893482
		1000	1.00832	1.02427						1000	0.87088	0.753664						1000	1.00832	1.00774						1000	0.87088	0.716946
		1001	0.824494	0.832928						1001	1.37047	1.38112						1001	0.824494	0.815532						1001	1.37047	0.870261
		1002	1.08336	1.34213						1002	0.841672	0.929692						1002	1.08336	1.38024						1002	0.841672	0.692213
		1003	1.54039	1.68716						1003	0.820885	1.06577						1003	1.54039	1.67863						1003	0.820885	0.92448
		1004	1.98101	0.298854						1004	0.679681	0.691641						1004	1.98101	1.06244						1004	0.679681	0.741194
		1005	1.34487	1.15158						1005	1.21726	1.35169						1005	1.34487	1.39207						1005	1.21726	1.34036
		1006	1.17612	1.55061						1006	1.09774	1.37561						1006	1.17612	1.31305						1006	1.09774	1.2809
		1007	0.844102	1.05006						1007	0.802608	0.974787						1007	0.844102	1.19067						1007	0.802608	0.764739
		1008	1.15482	1.22255						1008	0.925893	0.95015						1008	1.15482	1.20215						1008	0.925893	0.850388
		1009	1.3888	1.4815						1009	0.917471	0.923798						1009	1.3888	1.4875						1009	0.917471	0.665913
		1010	1.00568	1.44051						1010	1.56436	1.28456						1010	1.00568	1.26577						1010	1.56436	1.36731
		1011	1.41689	1.82042						1011	0.779492	0.907522						1011	1.41689	1.24915						1011	0.779492	0.684058
		1012	1.17744	1.38616						1012	1.11512	0.98356						1012	1.17744	1.18732						1012	1.11512	1.12494
		1013	0.961941	1.07493						1013	0.977501	0.915472						1013	0.961941	1.03812						1013	0.977501	0.731905
		1014	1.7327	1.77349						1014	1.62134	1.73318						1014	1.7327	1.4415						1014	1.62134	1.5095
		1015	1.16161	1.48142						1015	0.710323	0.801363						1015	1.16161	1.25835						1015	0.710323	0.665481
		1016	1.76211	1.5512						1016	0.496545	0.560982						1016	1.76211	1.44178						1016	0.496545	0.449144
		1017	1.50419	2.0896						1017	0.852244	0.95385						1017	1.50419	1.52302						1017	0.852244	0.899315
		1018	0.715894	0.578943						1018	1.26098	1.45949						1018	0.715894	0.931425						1018	1.26098	1.66951
		1019	0.860128	0.815353						1019	1.55307	1.36433						1019	0.860128	0.985057						1019	1.55307	1.06478
		1020	1.16161	1.28734						1020	0.990403	1.0549						1020	1.16161	1.10038						1020	0.990403	0.858542
		1021	0.726829	0.838482						1021	1.07194	1.00261						1021	0.726829	1.01394						1021	1.07194	0.758853
		1022	0.999272	1.05724						1022	0.949188	0.914855						1022	0.999272	1.18767						1022	0.949188	0.920646
		1023	1.41293	1.52228						1023	0.806908	0.939767						1023	1.41293	1.27347						1023	0.806908	2.1604
		1024	0.838634	0.968291						1024	1.09666	0.998603						1024	0.838634	0.900972						1024	1.09666	0.838129
		1025	1.20045	1.26318						1025	0.170234	0.0101772						1025	1.20045	1.16785						1025	0.170234	0.0294857
		1026	0.826191	1.07104						1026	1.28177	1.46991						1026	0.826191	0.963804						1026	1.28177	2.6845
		1027	1.13295	1.16277						1027	1.33589	1.25667						1027	1.13295	1.1692						1027	1.33589	1.15745
		1028	0.829961	0.879146						1028	0.807088	0.646854						1028	0.829961	0.985628						1028	0.807088	0.606024
		1029	0.85089	0.82777						1029	1.10294	1.29683						1029	0.85089	1.12969						1029	1.10294	1.31984
		1030	1.41538	1.1995						1030	0.845614	0.914341						1030	1.41538	1.29779						1030	0.845614	0.822144
		1031	1.24588	1.47467						1031	1.09093	0.811575						1031	1.24588	1.27996						1031	1.09093	0.766737
		1032	1.42651	1.22803						1032	1.29449	1.41642						1032	1.42651	1.03719						1032	1.29449	1.60638
		1033	1.16161	1.15848						1033	1.08842	1.23384						1033	1.16161	1.08968						1033	1.08842	0.816582
		1034	1.0317	1.06311						1034	0.807984	0.882267						1034	1.0317	1.21863						1034	0.807984	0.743624
		1035	0.817141	0.874465						1035	0.770174	0.926403						1035	0.817141	0.980707						1035	0.770174	0.840775
		1036	1.20686	1.24576						1036	1.21278	1.56616						1036	1.20686	1.17712						1036	1.21278	1.16836
		1037	1.06413	1.13563						1037	0.821781	0.619064						1037	1.06413	0.970579						1037	0.821781	0.61353
		1038	0.959301	1.03327						1038	0.845973	0.891005						1038	0.959301	1.05901						1038	0.845973	0.665049
		1039	0.638026	0.863277						1039	1.24826	0.173184						1039	0.638026	0.887707						1039	1.24826	0.279358
		1040	0.935356	1.01495						1040	0.729676	0.874934						1040	0.935356	1.19081						1040	0.729676	0.785908
		1041	1.24796	1.51534						1041	0.67108	0.758701						1041	1.24796	1.24095						1041	0.67108	0.679684
		1042	0.91292	1.00308						1042	1.12283	0.888504						1042	0.91292	0.955602						1042	1.12283	0.743408
		1043	1.39182	1.49959						1043	0.846152	0.922873						1043	1.39182	1.35713						1043	0.846152	0.767115
		1044	0.762086	0.805554						1044	0.860666	1.04654						1044	0.762086	1.13625						1044	0.860666	0.741086
		1045	0.394241	0.165197						1045	0.862996	0.961458						1045	0.394241	0.544092						1045	0.862996	0.711492
		1046	0.937619	1.11802						1046	0.759064	0.7562						1046	0.937619	0.979423						1046	0.759064	0.761283
		1047	1.39238	1.36315						1047	1.04721	1.3571						1047	1.39238	1.29793						1047	1.04721	0.801515
		1048	1.22778	1.45535						1048	0.70441	0.857081						1048	1.22778	1.11792						1048	0.70441	0.922968
		1049	1.34864	1.24199						1049	0.725375	0.877161						1049	1.34864	1.24751						1049	0.725375	0.95213
		1050	1.30735	1.42064						1050	1.19253	0.996375						1050	1.30735	1.22947						1050	1.19253	0.826573
		1051	1.08317	1.41183						1051	1.20526	1.04706						1051	1.08317	1.30728						1051	1.20526	0.757124
		1052	1.23778	1.26369						1052	1.0051	0.987569						1052	1.23778	1.24951						1052	1.0051	0.746216
		1053	1.0383	1.36125						1053	1.16153	1.31279						1053	1.0383	1.18304						1053	1.16153	0.660999
		1054	0.766611	0.925127						1054	1.08663	0.875791						1054	0.766611	0.878007						1054	1.08663	0.674986
		1055	1.01794	5.85311						1055	1.11297	1.09524						1055	1.01794	1.20194						1055	1.11297	0.769113
		1056	1.58432	1.57612						1056	0.796157	0.885317						1056	1.58432	1.4651						1056	0.796157	0.57454
		1057	0.666873	0.233712						1057	1.38785	1.37129						1057	0.666873	0.90682						1057	1.38785	1.54211
		1058	0.687989	0.794048						1058	1.39538	0.553683						1058	0.687989	0.809256						1058	1.39538	0.7116
		1059	1.56018	4.65222						1059	0.737919	0.931611						1059	1.56018	1.16207						1059	0.737919	1.19055
		1060	0.557707	0.710498						1060	1.37961	1.73856						1060	0.557707	0.907391						1060	1.37961	3.8926
		1061	1.38823	0.93683						1061	0.872852	0.8333						1061	1.38823	1.07884						1061	0.872852	0.96158
		1062	1.72308	1.54529						1062	1.05043	1.29134						1062	1.72308	1.1814						1062	1.05043	1.95319
		1063	1.21119	1.12171						1063	1.44484	1.50805						1063	1.21119	1.11436						1063	1.44484	1.95778
		1064	1.14181	1.28774						1064	0.786122	0.779981						1064	1.14181	1.01387						1064	0.786122	0.833647
		1065	0.483799	0.412873						1065	0.603524	0.81788						1065	0.483799	0.683164						1065	0.603524	0.533119
		1066	0.877851	1.12						1066	1.59805	1.49167						1066	0.877851	1.10523						1066	1.59805	1.38038
		1067	1.39879	1.16384						1067	0.812284	0.998637						1067	1.39879	0.95817						1067	0.812284	0.839965
		1068	1.52323	1.41822						1068	1.02517	1.17261						1068	1.52323	1.14253						1068	1.02517	1.54811
		1069	0.903493	1.49324						1069	1.12211	1.19711						1069	0.903493	1.92468						1069	1.12211	2.04191
		1070	0.919896	0.807815						1070	1.73836	0.760312						1070	0.919896	0.890631						1070	1.73836	1.33615
		1071	1.54586	1.58822						1071	1.05509	1.15726						1071	1.54586	1.20743						1071	1.05509	1.50728
		1072	0.823363	1.2068						1072	1.26618	1.59505						1072	0.823363	1.01451						1072	1.26618	1.66173
		1073	1.25286	1.46479						1073	0.696167	0.798725						1073	1.25286	1.17912						1073	0.696167	0.601757
		1074	0.508309	0.674078						1074	0.598685	0.772511						1074	0.508309	0.960309						1074	0.598685	0.831217
		1075	1.62448	1.21537						1075	1.25579	1.33613						1075	1.62448	1.0026						1075	1.25579	2.34433
		1076	1.33582	1.59603						1076	1.43068	1.74613						1076	1.33582	1.22497						1076	1.43068	5.21125
		1077	0.65952	0.737515						1077	1.62045	1.48132						1077	0.65952	0.757122						1077	1.62045	1.20967
		1078	1.52907	1.69549						1078	0.916216	0.946517						1078	1.52907	1.23054						1078	0.916216	0.644366
		1079	1.52078	1.96776						1079	1.17426	1.22901						1079	1.52078	1.30934						1079	1.17426	0.680278
		1080	1.24211	1.41885						1080	1.86666	0.182471						1080	1.24211	1.1369						1080	1.86666	0.595655
		1081	0.981926	0.71506						1081	0.923384	0.829188						1081	0.981926	0.971649						1081	0.923384	0.798059
		1082	0.674414	0.812496						1082	0.723763	0.940075						1082	0.674414	0.773097						1082	0.723763	0.761823
		1083	1.06093	1.03942						1083	0.739532	0.903547						1083	1.06093	1.11664						1083	0.739532	0.665373
		1084	1.09731	1.27179						1084	0.770353	0.883741						1084	1.09731	1.24123						1084	0.770353	0.631405
		1085	0.794327	1.18899						1085	0.673947	0.792694						1085	0.794327	0.90953						1085	0.673947	0.539816
		1086	0.891615	0.847765						1086	1.09433	1.16535						1086	0.891615	0.8549						1086	1.09433	0.839587
		1087	0.914428	1.0741						1087	0.955818	1.07927						1087	0.914428	1.15223						1087	0.955818	1.16361
		1088	0.835806	1.02883						1088	0.466799	0.623724						1088	0.835806	0.907034						1088	0.466799	0.553965
		1089	0.756807	0.755923						1089	0.60209	0.692258						1089	0.756807	0.796846						1089	0.60209	0.623035
		1090	0.941767	1.23271						1090	0.889696	0.908652						1090	0.941767	1.26641						1090	0.889696	0.58453
		1091	1.75589	1.8397						1091	0.763185	1.12662						1091	1.75589	1.43807						1091	0.763185	1.57954
		1092	0.833167	0.868514						1092	0.615888	0.6926						1092	0.833167	0.889704						1092	0.615888	0.669693
		1093	1.39917	1.15959						1093	0.496904	0.598058						1093	1.39917	1.13761						1093	0.496904	0.584206
		1094	1.19253	1.1605						1094	0.993449	1.11076						1094	1.19253	1.09553						1094	0.993449	0.772407
		1095	1.10768	0.822335						1095	1.34915	1.27904						1095	1.10768	1.00595						1095	1.34915	0.928747
		1096	1.13125	1.26104						1096	1.19863	1.22679						1096	1.13125	1.20643						1096	1.19863	0.717108
		1097	1.23476	0.945876						1097	0.634703	0.72906						1097	1.23476	1.17755						1097	0.634703	0.615798
		1098	1.17443	1.22704						1098	1.09666	1.25249						1098	1.17443	1.03912						1098	1.09666	1.85398
		1099	0.937053	1.13968						1099	1.27783	1.27709						1099	0.937053	1.15679						1099	1.27783	0.793361
		1100	1.06225	0.851495						1100	1.26224	1.24786						1100	1.06225	0.981206						1100	1.26224	0.958286
		1101	1.38314	1.13404						1101	1.10168	0.947717						1101	1.38314	1.0342						1101	1.10168	2.16185
		1102	0.614458	0.691812						1102	1.07194	1.01375						1102	0.614458	0.74514						1102	1.07194	0.68881
		1103	1.46459	1.81304						1103	1.09559	1.12707						1103	1.46459	1.42445						1103	1.09559	0.814638
		1104	0.688178	0.819042						1104	1.0438	1.23196						1104	0.688178	0.947329						1104	1.0438	0.910493
		1105	1.34675	1.10298						1105	1.22067	1.10918						1105	1.34675	1.13347						1105	1.22067	0.992092
		1106	0.990034	0.911242						1106	0.737381	0.848686						1106	0.990034	0.931925						1106	0.737381	0.831379
		1107	1.11636	0.906759						1107	1.01011	1.16689						1107	1.11636	1.0573						1107	1.01011	0.772191
		1108	1.37636	1.62801						1108	1.26779	1.3838						1108	1.37636	1.49927						1108	1.26779	0.879388
		1109	0.731731	0.909179						1109	0.753867	0.933976						1109	0.731731	0.991405						1109	0.753867	1.74392
		1110	1.52719	1.56481						1110	0.954564	0.963239						1110	1.52719	1.31234						1110	0.954564	0.688702
		1111	1.40105	1.26572						1111	1.38427	1.11915						1111	1.40105	1.21021						1111	1.38427	1.00354
		1112	0.568831	0.745291						1112	1.42674	1.4904						1112	0.568831	0.752129						1112	1.42674	0.927882
		1113	1.27266	1.47808						1113	0.828949	0.945489						1113	1.27266	1.26199						1113	0.828949	0.976107
		1114	0.861825	0.921398						1114	1.15132	1.20551						1114	0.861825	0.987125						1114	1.15132	1.26659
		1115	1.05112	1.12278						1115	1.53802	1.39973						1115	1.05112	1.09738						1115	1.53802	0.967467
		1116	1.11409	1.26631						1116	0.666421	0.873598						1116	1.11409	1.15037						1116	0.666421	1.2566
		1117	1.78625	1.60405						1117	0.76211	1.11158						1117	1.78625	1.28353						1117	0.76211	1.11085
		1118	1.2342	1.24759						1118	0.821423	0.770078						1118	1.2342	1.12684						1118	0.821423	0.777592
		1119	1.20818	1.26123						1119	0.772324	0.903375						1119	1.20818	1.07984						1119	0.772324	0.646202
		1120	1.10976	1.38723						1120	0.946679	0.942988						1120	1.10976	1.27625						1120	0.946679	0.697397
		1121	1.74024	1.7285						1121	0.896684	1.18292						1121	1.74024	1.37767						1121	0.896684	0.739087
		1122	0.893689	1.01828						1122	1.1997	1.13495						1122	0.893689	1.14816						1122	1.1997	0.782722
		1123	1.35995	1.17098						1123	0.818914	1.00426						1123	1.35995	1.34308						1123	0.818914	2.00314
		1124	1.11013	1.31376						1124	1.02266	1.28069						1124	1.11013	1.29729						1124	1.02266	0.838021
		1125	1.08374	1.25389						1125	0.890233	0.87603						1125	1.08374	1.28353						1125	0.890233	0.939223
		1126	0.489078	0.337059						1126	0.900447	1.11514						1126	0.489078	0.668544						1126	0.900447	0.714138
		1127	1.25154	1.48411						1127	0.999362	0.973759						1127	1.25154	1.34251						1127	0.999362	0.665319
		1128	1.24287	1.65748						1128	1.39681	1.43681						1128	1.24287	1.45605						1128	1.39681	1.16868
		1129	1.01737	0.891286						1129	1.28768	1.48475						1129	1.01737	1.05595						1129	1.28768	0.920916
		1130	1.6224	1.71596						1130	1.266	1.36783						1130	1.6224	1.43044						1130	1.266	1.01861
		1131	1.62485	1.88302						1131	1.65181	1.42416						1131	1.62485	1.4057						1131	1.65181	0.854276
		1132	1.1897	1.02443						1132	0.777341	0.676906						1132	1.1897	1.19317						1132	0.777341	0.558447
		1133	0.669135	0.783456						1133	0.791139	0.634381						1133	0.669135	0.965801						1133	0.791139	0.568167
		1134	1.08581	1.42897						1134	1.00295	1.27915						1134	1.08581	1.22205						1134	1.00295	0.778456
		1135	1.08298	1.28539						1135	1.1067	1.53635						1135	1.08298	1.19074						1135	1.1067	0.875499
		1136	2.15503	0.305003						1136	0.892025	0.970436						1136	2.15503	1.0792						1136	0.892025	0.936577
		1137	0.726075	0.757748						1137	0.949009	1.16624						1137	0.726075	0.970722						1137	0.949009	0.685084
		1138	0.547526	0.849511						1138	0.932165	0.741225						1138	0.547526	0.905679						1138	0.932165	0.750104
		1139	1.11183	1.42972						1139	1.09559	1.22415						1139	1.11183	2.53632						1139	1.09559	1.12024
		1140	1.09015	0.764016						1140	1.22335	1.40035						1140	1.09015	0.974645						1140	1.22335	0.810372
		1141	1.09298	1.34724						1141	0.701543	0.97304						1141	1.09298	1.26063						1141	0.701543	0.626383
		1142	1.13596	1.14091						1142	0.816764	1.04041						1142	1.13596	1.17077						1142	0.816764	0.895967
		1143	1.01586	1.25393						1143	0.951876	1.07649						1143	1.01586	1.05103						1143	0.951876	0.814908
		1144	0.994559	1.19958						1144	0.945067	0.741705						1144	0.994559	1.06365						1144	0.945067	0.883006
		1145	0.942332	1.188						1145	1.01029	0.643325						1145	0.942332	1.18946						1145	1.01029	0.614988
		1146	1.1733	1.51911						1146	0.964061	1.18121						1146	1.1733	1.28296						1146	0.964061	0.791632
		1147	0.823551	1.08636						1147	1.36474	1.67643						1147	0.823551	1.01687						1147	1.36474	2.7014
		1148	0.94139	0.822771						1148	1.9206	1.74034						1148	0.94139	1.00652						1148	1.9206	1.27339
		1149	1.25569	1.42326						1149	1.16046	1.29511						1149	1.25569	1.32011						1149	1.16046	1.16625
		1150	1.26719	1.24052						1150	1.11369	0.989899						1150	1.26719	1.34122						1150	1.11369	0.7487
		1151	1.16048	1.10734						1151	0.97535	1.10188						1151	1.16048	1.11357						1151	0.97535	0.884032
		1152	1.39238	1.32907						1152	1.01549	1.09571						1152	1.39238	1.36676						1152	1.01549	1.2127
		1153	1.12823	1.18137						1153	1.2169	1.45915						1153	1.12823	1.09617						1153	1.2169	1.12694
		1154	0.91933	1.24207						1154	1.13107	1.50678						1154	0.91933	1.05217						1154	1.13107	0.887542
		1155	1.01266	1.02209						1155	0.783434	0.523185						1155	1.01266	1.05987						1155	0.783434	0.740761
		1156	1.28322	1.31424						1156	1.51436	1.12666						1156	1.28322	1.39129						1156	1.51436	0.903203
		1157	0.691572	0.786114						1157	1.893	1.87422						1157	0.691572	1.12577						1157	1.893	0.91908
		1158	1.08657	1.15328						1158	0.567685	0.772236						1158	1.08657	1.2152						1158	0.567685	0.627193
		1159	0.873138	0.554227						1159	1.24074	1.23299						1159	0.873138	0.940126						1159	1.24074	0.862161
		1160	1.24834	1.3376						1160	0.193171	0.110065						1160	1.24834	1.08662						1160	0.193171	0.0797087
		1161	1.11127	0.816464						1161	1.56042	1.32695						1161	1.11127	1.12841						1161	1.56042	0.995386
		1162	0.598621	0.791311						1162	0.898655	0.651446						1162	0.598621	1.10559						1162	0.898655	0.747836
		1163	0.402726	0.181304						1163	0.829128	1.04712						1163	0.402726	0.560995						1163	0.829128	0.74978
		1164	1.00945	0.990349						1164	0.799382	1.07444						1164	1.00945	1.08569						1164	0.799382	0.716622
		1165	1.06884	1.22636						1165	0.90654	0.873803						1165	1.06884	0.920585						1165	0.90654	0.986908
		1166	0.799418	1.24481						1166	1.15902	1.35803						1166	0.799418	1.06344						1166	1.15902	1.13763
		1167	1.69292	1.6657						1167	1.09917	1.26335						1167	1.69292	1.48614						1167	1.09917	1.43384
		1168	0.493226	0.499796						1168	0.92213	1.02194						1168	0.493226	0.753556						1168	0.92213	0.696533
		1169	0.960432	1.06517						1169	1.14845	1.38972						1169	0.960432	0.970437						1169	1.14845	1.04718
		1170	0.825814	0.65325						1170	0.489736	0.700173						1170	0.825814	0.824233						1170	0.489736	0.560499
		1171	0.629164	0.234981						1171	0.976425	1.24577						1171	0.629164	0.939912						1171	0.976425	1.87985
		1172	0.652544	0.592115						1172	0.88432	1.05398						1172	0.652544	0.674035						1172	0.88432	0.876957
		1173	0.996067	0.675269						1173	1.96629	0.550085						1173	0.996067	1.1784						1173	1.96629	0.881224
		1174	0.987017	1.07652						1174	0.950622	1.05422						1174	0.987017	1.04126						1174	0.950622	0.948674
		1175	1.10806	0.964046						1175	1.48964	0.957825						1175	1.10806	0.982204						1175	1.48964	0.862593
		1176	0.918953	1.14515						1176	1.29306	0.853037						1176	0.918953	1.06886						1176	1.29306	0.790714
		1177	1.26964	1.16578						1177	1.06316	1.20321						1177	1.26964	1.25393						1177	1.06316	0.762579
		1178	1.40784	1.10294						1178	0.6933	0.712646						1178	1.40784	1.16064						1178	0.6933	0.834727
		1179	0.827133	0.899617						1179	1.1721	1.44068						1179	0.827133	0.868308						1179	1.1721	0.776188
		1180	1.35562	1.28492						1180	0.902777	1.18217						1180	1.35562	1.13782						1180	0.902777	0.931555
		1181	1.09543	1.09711						1181	1.06817	1.2689						1181	1.09543	0.933779						1181	1.06817	1.04102
[truncated: 183 more rows]

## Sheet: F7FSD
qPCR Analysis of ectoderm pluripotency markers in hESCs cultured in YSLC CM or SBN for 11 days followed by 4 days in FGF2
[truncated: 14 more rows]
