# Supplementary material for: An in vitro stem cell model of human epiblast and yolk sac interaction
Source: eLife. 2021 Aug 17;10:e63930. doi: 10.7554/eLife.63930 (PMC8370770; doi:10.7554/eLife.63930)
Supplement: Figure 7—source data 1. [file elife-63930-fig7-data1.xlsx]

## Sheet: F7B
SOX2, NANOG and OCT level analysis in hESCs cultured in 3D in YSLC CM for a 5 day period
Unit= fluorescence intensity (a.u.)
		Day 1																												Day 3
			Exp 1	88.3947	1			125.872	1.42398			Exp 2	40.4106	1			25.4987	0.630991			Exp 3	14.4013				23.1186	1.60531				Exp 1	18.5122	1			37.3241	2.01619			Exp 2	13.3339	1			84.3205	6.32378			Exp 3
			Control	SOX2	rel SOX2		+ YSLC CM	SOX2	rel SOX2			Control	SOX2	rel SOX2		+ YSLC CM	SOX2	rel SOX2			Control	SOX2	rel SOX2		+ YSLC CM	SOX2	rel SOX2				Control	SOX2	rel SOX2		+ YSLC CM	SOX2	rel SOX2			Control	SOX2	rel SOX2		+ YSLC CM	SOX2	rel SOX2			Control
				89.43	1.01171			134	1.51593				6.639	0.164289			73.257	1.81282				7.413	0.514745			9.81	0.681188					19.994	1.08005			67.843	3.66478				8.416	0.631175			58.562	4.39197
				121.785	1.37774			64.788	0.73294				26.425	0.653912			80	1.97968				16.147	1.12122			11.659	0.809579					18.647	1.00728			38.255	2.06648				6.067	0.455007			92.08	6.90572
				107.839	1.21997			150.913	1.70726				23.59	0.583757			73.914	1.82907				18.013	1.25079			8.335	0.578766					15.415	0.832695			21.597	1.16664				8.967	0.672498			72.394	5.42933
				89.016	1.00703			153.155	1.73263				49.725	1.23049			57.838	1.43126				11.028	0.765763			9.468	0.65744					20.445	1.10441			61.376	3.31544				7.994	0.599526			107.603	8.0699
				79.601	0.900518			61.491	0.695641				49.018	1.213			55.41	1.37117				6.774	0.470374			9.867	0.685146					20.863	1.12699			59.159	3.19568				7.739	0.580402			81.224	6.09156
				119.927	1.35672			110.283	1.24762				37.255	0.921911			60.172	1.48901				4.874	0.338441			14.289	0.992201					22.12	1.19489			57.555	3.10903				6.242	0.468131			91.517	6.8635
				115.779	1.3098			130.411	1.47533				31.962	0.790931			59.838	1.48075				15.381	1.06803			4.911	0.34101					22.741	1.22843			50.068	2.7046				8.08	0.605976			96.462	7.23436
				18.274	0.206732			126.656	1.43285				33.69	0.833692			51.682	1.27892				15.479	1.07483			17.586	1.22114					17.367	0.938139			68.328	3.69098				7.588	0.569077			64.664	4.84961
				134.246	1.51871			29.443	0.333086				34.689	0.858413			66.806	1.65318				12.549	0.871379			16.72	1.161					15.573	0.84123			56.695	3.06258				9.245	0.693347			68.371	5.12762
				84.002	0.950306			132.305	1.49675				41.595	1.02931			72.626	1.7972				11.125	0.772499			10.495	0.728753					24.379	1.31692			54.238	2.92986				7.096	0.532179			63.899	4.79223
				77.738	0.879442			113.751	1.28685				36.989	0.915329			70.409	1.74234				14.884	1.03352			12.219	0.848464					19.888	1.07432			38.421	2.07544				8.017	0.601251			94.63	7.09696
				82.928	0.938156			137.868	1.55969				46.104	1.14089			32.432	0.802561				25.593	1.77713			9.981	0.693062					18.15	0.980436			46.158	2.49339				8.949	0.671148			83.382	6.2534
				74.092	0.838195			139.811	1.58167				33.322	0.824585			37.833	0.936214				16.065	1.11552			10.571	0.73403					19.73	1.06578			36.463	1.96968				6.856	0.514179			113.618	8.52101
				79.421	0.898481			152.616	1.72653				32.646	0.807857			42.903	1.06168				11.482	0.797288			19.901	1.38189					14.491	0.782782			30.268	1.63503				5.827	0.437007			113.837	8.53743
				83.073	0.939796			93.813	1.0613				28.875	0.71454			32.228	0.797513				15.27	1.06032			18.942	1.3153					17.149	0.926363			17.682	0.955155				4.868	0.365085			61.92	4.64381
				97.823	1.10666			18.134	0.205148				44.282	1.0958			50.097	1.2397				12.839	0.891516			17.678	1.22753					19.131	1.03343			68.417	3.69578				5.049	0.37866			100.337	7.52497
				88.544	1.00169			109.289	1.23637				41.102	1.01711			35.462	0.877542				14.291	0.99234			21.373	1.4841					17.246	0.931603			33.313	1.79952				4.728	0.354586			92.618	6.94607
				93.412	1.05676			115.031	1.30133				36.437	0.901669			39.578	0.979396				11.978	0.831729			12.936	0.898251					22.124	1.19511			27.873	1.50566				5.595	0.419608			45.888	3.44146
				97.366	1.10149			127.273	1.43983				55.002	1.36108			46.453	1.14952				11.828	0.821314			14.693	1.02025					22.934	1.23886			36.991	1.9982				5.987	0.449007			84.979	6.37317
				116.886	1.32232			80.628	0.912136				25.358	0.627508			34.252	0.847599				13.765	0.955815			14.657	1.01775					11.397	0.615649			43.262	2.33695				5.017	0.37626			87.482	6.56089
				83.173	0.940927			126.987	1.43659				46.472	1.14999			27.637	0.683904				8.772	0.609111			1.403	0.0974216					13.841	0.74767			32.078	1.73281				4.835	0.36261			87.581	6.56831
				115.717	1.30909			34.076	0.385498				23.562	0.583065			37.713	0.933245				7.142	0.495927			1.107	0.076868					14.348	0.775057			32.671	1.76484				3.799	0.284914			62.079	4.65574
				69.015	0.780759			134.077	1.5168				36.647	0.906866			61.361	1.51844				15.726	1.09198			0.941	0.0653412					10.513	0.567896			32.455	1.75317				4.858	0.364335			97.049	7.27838
				114.057	1.29031			114.849	1.29927				34.331	0.849554			57.22	1.41596				15.801	1.09719			36.407	2.52803					19.31	1.0431			23.3	1.25863				5.72	0.428983			69.371	5.20262
				68.259	0.772207			106.064	1.19989				28.111	0.695634			65.542	1.6219				15.619	1.08455			23.55	1.63527					15.905	0.859164			42.027	2.27024				5.817	0.436257			98.282	7.37085
				96.938	1.09665			95.023	1.07499				33.592	0.831267			58.85	1.4563				16.165	1.12247			37.404	2.59726					15.213	0.821783			22.948	1.23962				2.685	0.201367			55.436	4.15753
				106.76	1.20776			17.294	0.195645				30.367	0.751461			44.518	1.10164				14.143	0.982063			22.737	1.57881					17.355	0.937491			44.326	2.39442				6.255	0.469106			73.252	5.49368
				63.023	0.712973			104.83	1.18593				28.054	0.694223			54.893	1.35838				13.296	0.923249			27.296	1.89538					14.064	0.759716			45.996	2.48463				5.948	0.446082			108.453	8.13365
				81.932	0.926888			112.657	1.27448				55.301	1.36848			45.425	1.12409				15.955	1.10788			25.739	1.78727					15.377	0.830642			18.236	0.985081				7.221	0.541553			58.13	4.35957
				98.918	1.11905			123.104	1.39266				47.348	1.17167			39.794	0.984741				12.121	0.841659			1.228	0.08527					22.386	1.20926			47.313	2.55578				6.351	0.476306			60.321	4.52389
				101.259	1.14553			76.603	0.866602				38.596	0.955096			35.725	0.88405				12.692	0.881308			25.406	1.76414					23.419	1.26506			54.17	2.92618				3.104	0.232791			105.279	7.89561
				30.423	0.344172			32.604	0.368846				42.792	1.05893			35.708	0.883629				16.324	1.13351			26.598	1.84691					19.144	1.03413			37.523	2.02694				3.215	0.241115			116.061	8.70423
				81.695	0.924207			104.634	1.18371				38.679	0.957149			33.528	0.829683				17.066	1.18503			32.253	2.23959					10.449	0.564439			43.412	2.34505				3.367	0.252515			99.422	7.45635
				162.107	1.8339			88.288	0.998793				40.058	0.991274			51.362	1.271				20.69	1.43667			27.295	1.89531					17.13	0.925337			19.334	1.04439				5.627	0.422008			62.526	4.68926
				105.251	1.19069			138.666	1.56871				46.119	1.14126			37.379	0.92498				12.885	0.89471			21.516	1.49403					21.083	1.13887			13.567	0.732869				7.449	0.558653			71.688	5.37638
				85.358	0.965646			95.623	1.08177				41.541	1.02797			35.391	0.875785				16.257	1.12885			27.586	1.91552					16.991	0.917828			13.094	0.707318				3.302	0.24764			100.304	7.5225
				22.803	0.257968			35.503	0.401642				40.485	1.00184			40.658	1.00612				12.272	0.852144			20.155	1.39952					19.915	1.07578			56.893	3.07327				3.858	0.289338			114.509	8.58783
				111.604	1.26256			49.115	0.555633				24.18	0.598358			38.603	0.955269				15.016	1.04268			11.322	0.786178					17.023	0.919557			27.86	1.50496				5.175	0.388109			57.941	4.3454
				64.681	0.731729			133.725	1.51282				29.028	0.718326			33.753	0.835251				11.429	0.793608			27.818	1.93163					14.963	0.808279			65.27	3.52579				7.196	0.539678			65.364	4.9021
				20.453	0.231383			131.756	1.49054				21.251	0.525877			30.046	0.743517				16.924	1.17517			31.013	2.15348					22.362	1.20796			70.384	3.80204				5.077	0.38076			41.428	3.10698
				33.789	0.382251			121.718	1.37698				63.024	1.55959			24.728	0.611918				15.908	1.10462			26.005	1.80574					16.415	0.886714			29.156	1.57496				9.552	0.716371			100.51	7.53795
				111.988	1.26691			164.493	1.86089				62.839	1.55501			34.651	0.857473				17.406	1.20864			31.379	2.1789					19.31	1.0431			17.327	0.935978				4.89	0.366735			40.776	3.05808
				31.639	0.357929			169.247	1.91467				73.568	1.82051			39.798	0.98484				19.013	1.32023			28.702	1.99301					18.288	0.98789			53.129	2.86995				6.23	0.467231			63.677	4.77558
				45.768	0.517769			152.218	1.72203				65.567	1.62252			31.524	0.780092				15.686	1.08921			36.762	2.55268					18.977	1.02511			45.08	2.43515				5.562	0.417133			117.674	8.8252
				112.545	1.27321			142.837	1.6159				47.11	1.16578			9.856	0.243896				22.926	1.59194			37.677	2.61622					24.316	1.31351			39.512	2.13438				5.496	0.412183			65.24	4.8928
				106.299	1.20255			175.813	1.98895				4.598	0.113782			26.022	0.64394				15.218	1.05671			33.413	2.32013					20.153	1.08863			39.356	2.12595				4.352	0.326387			45.538	3.41521
				92.784	1.04966			202.281	2.28838				25.523	0.631591			38.623	0.955764				13.973	0.970258			38.53	2.67545					19.396	1.04774			40.924	2.21065				7.431	0.557303			58.698	4.40217
				105.732	1.19614			96.821	1.09533				11.81	0.29225			33.087	0.81877				15.068	1.04629			28.451	1.97558					11.229	0.606574			50.836	2.74608				7.212	0.540878			37.456	2.80909
				103.757	1.17379			39.253	0.444065				52.398	1.29664			46.93	1.16133				15.987	1.11011			31.55	2.19077					20.934	1.13082			24.706	1.33458				4.728	0.354586			108.636	8.14737
				36.432	0.412151			136.648	1.54588				29.525	0.730625			56.595	1.4005				19.256	1.3371			15.053	1.04525					15.586	0.841932			44.814	2.42078				6.962	0.522129			17.144	1.28575
				158.285	1.79066			141.353	1.59911				45.936	1.13673			43.843	1.08494				13.117	0.910819			23.422	1.62638					25.309	1.36715			51.954	2.80648				5.963	0.447207			30.824	2.31171
				118.138	1.33648			148.338	1.67813				33.98	0.840868			43.174	1.06838				15.602	1.08337			17.708	1.22961					16.778	0.906322			87.215	4.71122				6.026	0.451932			40.739	3.0553
				157.454	1.78126			131.886	1.49201				51.774	1.2812			26.724	0.661311				24.118	1.67471			23.095	1.60367					20.828	1.1251			47.05	2.54157				2.005	0.150369			76.416	5.73097
				21.467	0.242854			158.414	1.79212				53.608	1.32658			32.671	0.808476				9.069	0.629734			18.08	1.25544					16.895	0.912642			32.33	1.74642				4.606	0.345436			51.656	3.87404
				113.333	1.28212			135.319	1.53085				38.96	0.964103			34.729	0.859403				17.571	1.2201			11.365	0.789164					18.06	0.975574			45.326	2.44844				3.299	0.247415			43.761	3.28194
				144.173	1.63101			166.518	1.8838				65.211	1.61371			33.032	0.817409				17.771	1.23398			34.833	2.41874					20.113	1.08647			49.84	2.69228				2.503	0.187717			82.276	6.17045
				46.176	0.522384			178.887	2.02373				27.394	0.677891			38.972	0.9644				15.919	1.10538			26.568	1.84483					11.75	0.634717			11.539	0.623319				6.048	0.453582			99.726	7.47915
				83.773	0.947715			158.893	1.79754				63.082	1.56103			34.707	0.858858				17.025	1.18218			25.41	1.76442					17.612	0.951374			31.211	1.68597				6.396	0.479681			64.072	4.80521
				13.314	0.15062			164.116	1.85663				5.437	0.134544			38.137	0.943737				24.866	1.72665			22.807	1.58367					18.525	1.00069			19.528	1.05487				4.955	0.37161			85.36	6.40174
				111.022	1.25598			151.277	1.71138				57.032	1.41131			34.717	0.859106				8.455	0.587099			40.869	2.83787					19.074	1.03035			4.722	0.255075				4.764	0.357286			92.842	6.96287
				100.473	1.13664			179.393	2.02945				73.726	1.82442			22.681	0.561263				17.283	1.2001			36.106	2.50713					15.819	0.854519			8.174	0.441547				3.495	0.262114			118.377	8.87792
				84.295	0.95362			125.428	1.41895				29.843	0.738494			21.99	0.544164				15.223	1.05706			20.725	1.4391					7.414	0.400493			35.813	1.93456				7.756	0.581677			8.92	0.668973
				108.901	1.23199			164.951	1.86607				79.874	1.97656			43.72	1.08189				15.466	1.07393			36.6	2.54143					18.329	0.990105			20.107	1.08615				7.351	0.551303			19.229	1.44212
				105.333	1.19162			133.797	1.51363				39.475	0.976847			33.768	0.835622				15.599	1.08316			32.23	2.23799					18.024	0.973629			33.784	1.82496				7.51	0.563227			100.07	7.50495
				94.167	1.0653			119.285	1.34946				12.289	0.304103			36.684	0.907781				13.989	0.971369			32.395	2.24945					16.476	0.890009			38.195	2.06324				6.538	0.49033			110.166	8.26212
				25.155	0.284576			177.185	2.00448				33.625	0.832083			19.015	0.470545				15.105	1.04886			39.532	2.74503					24.446	1.32054			40.958	2.21249				6.178	0.463331			85.293	6.39672
				27.543	0.311591			159.756	1.8073				63.751	1.57758			21.985	0.54404				13.792	0.95769			16.638	1.15531					21.561	1.16469			58.39	3.15414				5.324	0.399284			64.376	4.82801
				33.28	0.376493			171.003	1.93454				50.582	1.2517			36.128	0.894022				16.395	1.13844			17.107	1.18788					15.057	0.813356			41.209	2.22605				5.788	0.434083			46.516	3.48856
				120.013	1.35769			141.891	1.6052				50.48	1.24918			32.141	0.79536				18.356	1.27461			15.136	1.05101					13.535	0.73114			35.903	1.93943				5.932	0.444882			68.282	5.12094
				74.654	0.844553			161.116	1.82269				37.769	0.934631			34.931	0.864402				15.057	1.04553			20.328	1.41154					18.644	1.00712			61.859	3.34153				7.541	0.565552			36.827	2.76191
				123.427	1.39632			151.124	1.70965				46.083	1.14037			18.997	0.470099				17.984	1.24877			25.095	1.74255					16.675	0.900758			61.138	3.30258				6.255	0.469106			31.526	2.36436
				109.762	1.24173			147.571	1.66946				11.232	0.277947			27.549	0.681727				14.833	1.02998			19.998	1.38862					13.689	0.739459			27.115	1.46471				6.617	0.496255			85.532	6.41464
				109.04	1.23356			127.69	1.44454				48.425	1.19832			17.43	0.431322				16.553	1.14941			1.827	0.126863					23.908	1.29147			50.179	2.71059				4.389	0.329162			91.254	6.84378
				107.234	1.21313			104.135	1.17807				63.082	1.56103			30.251	0.74859				17.617	1.22329			19.779	1.37342					23.366	1.2622			45.164	2.43969				5.233	0.392459			61.359	4.60174
				133.666	1.51215			187.584	2.12212				52.409	1.29691			29.293	0.724884				12.979	0.901237			26.771	1.85893					24.057	1.29952			47.696	2.57647				5.686	0.426433			126.773	9.50759
				77.558	0.877406			172.229	1.94841				63.72	1.57681			24.075	0.595759				11.469	0.796385			22.592	1.56875					24.615	1.32967			31.133	1.68176				2.701	0.202567			54.215	4.06596
				109.684	1.24084			145.748	1.64883				58.276	1.4421			29.467	0.72919				13.849	0.961648			9.741	0.676396					17.154	0.926633			40.612	2.1938				2.316	0.173693			105.473	7.91016
				97.818	1.1066			137.45	1.55496				5.457	0.135039			32.161	0.795855				11.12	0.772152			18.378	1.27613					13.095	0.707372			43.674	2.3592				6.17	0.462731			123.944	9.29543
				84.896	0.96042			127.937	1.44734				55.397	1.37085			21.111	0.522412				14.37	0.997825			29.596	2.05509					20.281	1.09555			46.783	2.52715				3.538	0.265339			84.697	6.35202
				113.59	1.28503			118.487	1.34043				30.481	0.754282			34.422	0.851806				16.512	1.14656			31.187	2.16557					17.471	0.943757			48.038	2.59494				3.558	0.266839			94.673	7.10019
				107.423	1.21527			29.636	0.335269				32.586	0.806372			32.563	0.805803				15.121	1.04997			18.057	1.25384					11.631	0.628289			61.13	3.30215				5.903	0.442707			87.881	6.59081
				86.629	0.980025			144.885	1.63907				32.722	0.809738			25.924	0.641515				20.019	1.39008			8.337	0.578905					16.169	0.873425			21.418	1.15697				5.827	0.437007			70.358	5.27664
				77.372	0.875301			159.016	1.79893				39.579	0.979421			20.436	0.505709				23.771	1.65061			21.464	1.49042					27.283	1.47379			28.247	1.52586				8.93	0.669723			58.923	4.41905
				105.05	1.18842			141.153	1.59685				17.174	0.424987			27.346	0.676703				11.47	0.796455			23.614	1.63971					14.15	0.764362			23.744	1.28262				5.12	0.383985			121.899	9.14206
				108.378	1.22607			131.334	1.48577				39.002	0.965142			22.85	0.565445				15.185	1.05442			26.817	1.86212					16.364	0.883959			33.669	1.81875				6.484	0.48628			83.841	6.28782
				18.485	0.209119			173.64	1.96437				31.4	0.777024			14.855	0.367601				14.802	1.02782			24.128	1.6754					11.913	0.643522			52.531	2.83765				4.993	0.37446			64.482	4.83596
				78.469	0.887712			143.598	1.62451				46.144	1.14188			28.338	0.701251				14.256	0.989909			15.235	1.05789					19.795	1.0693			18.269	0.986864				5.083	0.38121			104.136	7.80989
				25.366	0.286963			138.097	1.56228				45.828	1.13406			32.434	0.802611				16.489	1.14496			17.533	1.21746					17.078	0.922528			21.762	1.17555				15.238	1.1428			65.111	4.88313
				20.639	0.233487			115.602	1.30779				50.668	1.25383			21.062	0.5212				15.595	1.08289			22.59	1.56861					23.141	1.25004			21.383	1.15508				12.094	0.907014			91.076	6.83043
				28.075	0.31761			170.034	1.92358				29.677	0.734386			24.35	0.602564				17.974	1.24808			20.71	1.43806					10.163	0.54899			16.345	0.882932				11.432	0.857366			64.212	4.81571
				85.766	0.970262			160.758	1.81864				49.075	1.21441			21.041	0.52068				18.829	1.30745			26.448	1.8365					14.726	0.795476			23.406	1.26436				21.925	1.64431			62.901	4.71739
				81.11	0.917589			148.91	1.6846				32.035	0.792737			22.526	0.557428				12.499	0.867907			24.305	1.68769					27.991	1.51203			17.697	0.955965				17.568	1.31755			55.348	4.15093
				70.94	0.802537			166.711	1.88598				37.383	0.925079			27.289	0.675293				16.961	1.17774			27.691	1.92281					20.093	1.08539			14.292	0.772032				15.182	1.1386			92.371	6.92755
				73.108	0.827063			108.87	1.23163				33.97	0.840621			29.648	0.733669				19.928	1.38376			32.824	2.27924					15.903	0.859056			16.255	0.878071				11.342	0.850616			61.907	4.64284
				81.046	0.916865			150.14	1.69852				22.118	0.547331			23.899	0.591404				16.187	1.12399			27.362	1.89996					16.882	0.91194			20.996	1.13417				12.568	0.942562			77.526	5.81422
				97.676	1.105			142.415	1.61113				42.086	1.04146			30.775	0.761557				19.109	1.32689			30.053	2.08682					23.162	1.25118			18.695	1.00988				10.763	0.807193			83.152	6.23615
				79.93	0.90424			140.606	1.59066				33.812	0.836711			35.083	0.868163				15.117	1.0497			1.838	0.127627					18.004	0.972549			18.51	0.999882				12.253	0.918938			44.506	3.33782
				91.355	1.03349			135.105	1.52843				31.079	0.76908			27.526	0.681158				12.347	0.857352			32.473	2.25486					13.648	0.737244			18.268	0.98681				8.9	0.667473			13.602	1.02011
				97.155	1.0991			114.337	1.29348				41.36	1.02349			22.351	0.553097				11.837	0.821939			30.195	2.09668					14.127	0.763119			13.429	0.725414				13.576	1.01816			75.062	5.62942
				77.423	0.875878			65.112	0.736605				47.948	1.18652			31.109	0.769822				13.452	0.934081			16.161	1.12219					11.263	0.60841			13.24	0.715205				11.912	0.893364			55.681	4.17591
				112.469	1.27235			71.123	0.804607				49.226	1.21815			21.688	0.536691				11.766	0.817009			18.524	1.28627					15.7	0.84809			28.868	1.55941				14.56	1.09196			96.392	7.22911
				111.38	1.26003			124.515	1.40863				29.662	0.734015			26.487	0.655447				12.648	0.878253			18.407	1.27815					34.523	1.86488			33.405	1.80449				14.238	1.06781			71.693	5.37676
				76.61	0.866681			166.087	1.87892				43.621	1.07944			24.005	0.594027				18.691	1.29787			22.91	1.59083					15.964	0.862351			32.656	1.76403				10.755	0.806593			126.143	9.46034
				62.581	0.707972			161.329	1.8251				61.936	1.53267			27.975	0.692269				15.042	1.04449			0.923	0.0640914					31.448	1.69877			28.689	1.54974				14.752	1.10636			93.588	7.01882
				82.022	0.927906			171.733	1.9428				53.676	1.32826			32.163	0.795905				15.45	1.07282			15.812	1.09796					17.666	0.954291			31.954	1.72611				12.695	0.952087			80.124	6.00906
				103.87	1.17507			153.686	1.73863				41.245	1.02065			28.673	0.709541				12.364	0.858533			11.87	0.82423					22.995	1.24216			34.403	1.8584				19.352	1.45134			47.52	3.56386
				89.377	1.01111			124.218	1.40527				52.183	1.29132			28.678	0.709665				14.269	0.990812			21.825	1.51549					14.648	0.791263			24.296	1.31243				14.067	1.05498			91.613	6.8707
				86.403	0.977468			107.838	1.21996				36	0.890855			27.564	0.682098				15.838	1.09976			22.311	1.54923					20.608	1.11321			28.036	1.51446				15.502	1.1626			115.146	8.6356
				115.548	1.30718			61.657	0.697519				73.881	1.82826			32.952	0.815429				10.789	0.749168			19.609	1.36161					27.576	1.48961			31.506	1.70191				12.488	0.936562			77.942	5.84542
				19.512	0.220737			67.271	0.76103				42.521	1.05222			30.44	0.753267				14.586	1.01282			33.191	2.30472					19.7	1.06416			37.033	2.00047				12.036	0.902664			107.866	8.08962
				70.517	0.797751			123.977	1.40254								24.047	0.595066				10.364	0.719656			32.063	2.22639					11.209	0.605493			14.598	0.788562				11.464	0.859765			60.718	4.55367
				113.043	1.27884			164.861	1.86506								25.376	0.627954				10.122	0.702852			24.468	1.69901					15.047	0.812816			25.638	1.38493				11.998	0.899814			11.172	0.837866
				29.414	0.332757			161.583	1.82797								32.339	0.80026				10.703	0.743196			34.551	2.39916					17.681	0.955101			38.995	2.10645				13.818	1.03631			100.438	7.53255
				135.595	1.53397			171.686	1.94227								20.226	0.500512				18.745	1.30162			31.212	2.1673					17.098	0.923608			21.066	1.13795				12.575	0.943087			76.647	5.74829
				103.163	1.16707			154.538	1.74827								23.922	0.591973				11.826	0.821175			11.928	0.828258					17.742	0.958396			30.107	1.62633				11.464	0.859765			72.894	5.46683
				95.071	1.07553			119.449	1.35131								17.931	0.44372				20.401	1.41661			24.171	1.67839					19.301	1.04261			30.924	1.67047				15.146	1.1359			80.823	6.06148
				99.117	1.1213			113.785	1.28724								22.533	0.557601				5.368	0.372744			36.463	2.53192					18.581	1.00372			28.485	1.53872				12.724	0.954262			99.542	7.46535
				14.387	0.162759			116.879	1.32224								30.772	0.761483				16.384	1.13767			29.095	2.0203					13.476	0.727953			30.734	1.6602				13.775	1.03308			95.778	7.18306
				21.157	0.239347			105.417	1.19257								32.379	0.80125				15.154	1.05226			1.148	0.0797149					16.719	0.903135			25.22	1.36235				12.162	0.912113			90.057	6.754
				83.844	0.948518			119.064	1.34696								27.93	0.691155				14.367	0.997617			41.749	2.89897					17.528	0.946836			32.854	1.77472				18.963	1.42217			122.961	9.2217
				105.872	1.19772			116.848	1.32189								31.765	0.786056				15.041	1.04442			23.154	1.60777					19.345	1.04499			23.143	1.25015				11.541	0.86554			123.858	9.28898
				98.203	1.11096			139.85	1.58211								12.772	0.316056				11.865	0.823883			30.603	2.12501					17.088	0.923068			30.243	1.63368				15.173	1.13793			101.601	7.61977
				81.866	0.926141			180.735	2.04464								31.604	0.782072				22.133	1.53687			38.23	2.65462					18.879	1.01982			27.766	1.49988				11.437	0.857741			148.889	11.1662
				74.462	0.842381			144.161	1.63088								30.573	0.756559				13.049	0.906098			18.106	1.25725					15.753	0.850953			31.035	1.67646				11.371	0.852791			72.744	5.45558
				97.439	1.10232			8.633	0.0976642								20.445	0.505931				11.349	0.788053			15.675	1.08844					17.275	0.933169			29.887	1.61445				15.725	1.17933			118.555	8.89127
				103.585	1.17185			116.875	1.32219								21.653	0.535825				16.74	1.16239			19.946	1.38501					17.634	0.952562			32.669	1.76473				11.344	0.850766			107.977	8.09795
				17.443	0.197331			124.689	1.41059								22.533	0.557601				20.39	1.41584			25.397	1.76352					13.157	0.710721			34.767	1.87806				14.202	1.06511			100.27	7.51995
				72.087	0.815513			141.769	1.60382								27.168	0.672299				15.493	1.0758			42.42	2.94556					21.476	1.1601			36.89	1.99274				8.875	0.665598			93.457	7.00899
				122.015	1.38034			135.798	1.53627								21.765	0.538596				18.18	1.26238			27.344	1.89872					12.593	0.680255			32.761	1.7697				12.8	0.959961			111.076	8.33037
				112.455	1.27219			13.785	0.155948								25.723	0.636541				13.929	0.967203			32.813	2.27847					13.722	0.741242			29.578	1.59776				13.708	1.02806			94.701	7.10229
				131.745	1.49042			115.884	1.31098								30.317	0.750224				18.46	1.28183			36.017	2.50095					22.199	1.19916			31.846	1.72027				13.701	1.02753			113.751	8.53098
				104.065	1.17728			113.448	1.28343								25.641	0.634511				14.643	1.01678			13.985	0.971092					19.787	1.06886			15.093	0.815301				15.379	1.15338			116.22	8.71615
				117.629	1.33072			132.231	1.49592								26.757	0.662128				14.235	0.988451			19.833	1.37717					23.05	1.24513			47.02	2.53995				14.014	1.05101			85.27	6.39499
				110.447	1.24948			30.739	0.347747								18.06	0.446912				17.948	1.24627			27.103	1.88198					20.079	1.08464			11.188	0.604359				13.23	0.99221			93.561	7.01679
				122.542	1.3863			28.714	0.324838								32.12	0.794841				14.002	0.972272			39.283	2.72774					23.838	1.28769			8.835	0.477253				13.714	1.02851			91.715	6.87835
				77.848	0.880686			152.14	1.72114								30.239	0.748293				10.206	0.708685			27.355	1.89948					22.109	1.19429			69.861	3.77379				15.393	1.15443			92.094	6.90677
				80.094	0.906095			85.029	0.961924								40.189	0.994516				11.414	0.792566			14.331	0.995117					13.675	0.738703			60.286	3.25656				12.804	0.960261			63.9	4.79231
				95.646	1.08203			117.579	1.33016								37.046	0.916739				12.179	0.845686			35.781	2.48456					16.662	0.900056			9.789	0.528787				12.128	0.909563			108.648	8.14827
				157.037	1.77654			91.711	1.03752								42.182	1.04383				10.501	0.729169			40.139	2.78718					8.671	0.468394			19.486	1.0526				12.837	0.962736			88.95	6.67098
				94.609	1.0703			108.762	1.23041								39.833	0.985706				17.035	1.18288			40.734	2.82849					18.236	0.985081			13.605	0.734922				17.374	1.303			55.661	4.17441
				101.374	1.14683			165.787	1.87553								21.389	0.529292				20.495	1.42313			44.226	3.07097					23.142	1.2501			64.923	3.50704				13.883	1.04118			120.239	9.01756
				85.62	0.96861			155.484	1.75897								29.397	0.727457				12.108	0.840756			19.103	1.32648					12.56	0.678472			71.595	3.86745				11.892	0.891864			109.797	8.23444
				120.233	1.36018			146.167	1.65357								25.901	0.640945				15.821	1.09858			20.069	1.39355					17.74	0.958288			81.834	4.42055				12.404	0.930263			61.082	4.58097
				96.57	1.09249			159.836	1.80821								35.641	0.881971				4.641	0.322262			14.037	0.974702					10.728	0.57951			40.502	2.18786				8.795	0.659598			74.3	5.57228
				147.234	1.66564			148.062	1.67501								30.461	0.753787				14.563	1.01123			31.742	2.2041					15.285	0.825673			87.022	4.7008				10.096	0.75717			119.774	8.98269
				138.987	1.57235			111.825	1.26506								34.327	0.849455				16.32	1.13323			29.335	2.03697					25.54	1.37963			84.705	4.57564				12.789	0.959136			77.164	5.78707
				106.903	1.20938			33.081	0.374242								31.308	0.774747				19.428	1.34904			32.228	2.23785					18.822	1.01674			43.607	2.35558				13.11	0.98321			90.487	6.78625
				33.3	0.376719			57.709	0.652856								31.646	0.783111				20.312	1.41043			27.466	1.90719					16.916	0.913777			64.833	3.50218				15.692	1.17685			100.435	7.53232
				76.291	0.863072			183.419	2.075								34.645	0.857324				20.896	1.45098			32.344	2.24591					18.801	1.0156			15.318	0.827455				13.806	1.03541			64.668	4.84991
				39.396	0.445683			167.224	1.89179								18.39	0.455078				17.607	1.2226			18.251	1.26731					25.31	1.36721			56.596	3.05723				16.162	1.2121			71.869	5.38996
				160.302	1.81348			139.995	1.58375								16.685	0.412887				15.507	1.07678			38.212	2.65337					17.419	0.940948			68.139	3.68077				16.789	1.25912			66.102	4.95745
				154.028	1.7425			131.41	1.48663								31.46	0.778508				15.374	1.06754			35.997	2.49956					14.942	0.807144			25.398	1.37196				17.366	1.3024			94.384	7.07852
				172.918	1.9562			121.993	1.38009								31.28	0.774054				17.62	1.2235			35.656	2.47588					19.267	1.04077			79.462	4.29242				17.243	1.29317			86.984	6.52354
				131.906	1.49224			113.81	1.28752								31.879	0.788877				20.692	1.43681			12.798	0.888669					15.357	0.829562			50.7	2.73874				19.482	1.46109			120.124	9.00894
				119.081	1.34715			28.524	0.322689								38.31	0.948018				17.804	1.23628			20.989	1.45744					13.042	0.704509			49.576	2.67802				12.346	0.925913			106.031	7.95201
				72.506	0.820253			136.447	1.54361								22.684	0.561338				19.238	1.33585			21.769	1.5116					17.793	0.961151			48.582	2.62433				12.289	0.921638			111.516	8.36336
				128.849	1.45766			156.45	1.7699								30.626	0.75787				18.757	1.30245			24.106	1.67387					15.272	0.82497			53.547	2.89253				13.289	0.996635			60.764	4.55712
				137.374	1.5541			128.175	1.45003								27.486	0.680168				19.413	1.348			19.869	1.37967					13.778	0.744267			42.079	2.27304				9.477	0.710746			94.382	7.07837
				48.602	0.549829			144.907	1.63932								22.013	0.544733				19.482	1.35279			11.036	0.766319					16.079	0.868563			55.316	2.98809				13.795	1.03458			82.114	6.1583
				121.497	1.37448			137.506	1.55559								33.745	0.835053				13.46	0.934637									18.8	1.01555			19.189	1.03656				15.88	1.19095			86.729	6.50441
				134.113	1.51721			111.547	1.26192								28.117	0.695782				3.855	0.267684									21.83	1.17922			35.16	1.89929				13.004	0.975261			88.575	6.64286
				187.507	2.12125			104.016	1.17672								25.562	0.632557				11.784	0.818258									15.051	0.813032			53.031	2.86465				9.842	0.73812			66.086	4.95625
				21.283	0.240772			83.189	0.941108								32.454	0.803106				13.738	0.95394									19.683	1.06325			33.032	1.78434				18.298	1.37229			94.584	7.09351
				55.482	0.627662			21.195	0.239777								36.027	0.891523				20.013	1.38966									19.289	1.04196			60.112	3.24716				11.335	0.850091			55.166	4.13728
				12.969	0.146717			166.103	1.87911								26.508	0.655966				6.658	0.462319									22.414	1.21077			33.569	1.81335				14.55	1.09121			104.404	7.82999
				91.408	1.03409			116.782	1.32114								30.128	0.745547				12.9	0.895751									18.78	1.01447			14.628	0.790183				16.242	1.2181			72.946	5.47073
				89.506	1.01257			166.387	1.88232								30.539	0.755717				7.553	0.524466									19.864	1.07302			48.108	2.59872				13.946	1.04591			102.258	7.66904
				77.335	0.874883			149.103	1.68679								29.886	0.739558				12.362	0.858394									17.156	0.926741			36.387	1.96557				14.976	1.12315			47.59	3.56911
				90.055	1.01878			159.454	1.80389								28.637	0.70865				16.917	1.17468									21.526	1.1628			40.567	2.19137				12.601	0.945037			105.642	7.92283
				51.694	0.584809			143.198	1.61998								32.218	0.797266				11.602	0.805621									22.134	1.19565			21.954	1.18592				19.844	1.48824			118.733	8.90462
				79.931	0.904251			145.882	1.65035								17.655	0.43689				12.852	0.892418									24.466	1.32162			7.647	0.413079				22.526	1.68938			96.814	7.26076
				75.296	0.851816			65.312	0.738868								31.669	0.78368				16.869	1.17135									21.412	1.15664			39.751	2.14729				12.898	0.967311			69.953	5.24626
				68.934	0.779843			66.161	0.748472								21.953	0.543248				16.57	1.15059									15.757	0.851169			63.569	3.4339				17.682	1.3261			99.578	7.46805
				149.589	1.69228			178.69	2.0215								24.697	0.611151				11.583	0.804301									16.661	0.900002			14.346	0.774949				16.092	1.20685			112.304	8.42246
				130.222	1.47319			162.329	1.83641								16.489	0.408036				20.333	1.41188									21.303	1.15076			14.589	0.788076				16.508	1.23805			63.331	4.74963
				108.243	1.22454			152.746	1.728								25.212	0.623895				11.192	0.777151									23.896	1.29083			8.457	0.456834				18.4	1.37994			99.178	7.43805
				28.703	0.324714			135.601	1.53404								17.943	0.444017				3.911	0.271572									22.474	1.21401			48.215	2.6045				28.019	2.10134			64.568	4.84241
				142.928	1.61693			146.462	1.65691								24.108	0.596576				17.108	1.18795									20.9	1.12899			53.475	2.88864				11.06	0.829467			115.002	8.6248
				50.509	0.571403			158.486	1.79294								18.264	0.45196				16.597	1.15246									13.496	0.729034			46.532	2.51359				21.759	1.63186			64.697	4.85208
				122.274	1.38327			135.331	1.53099								18.561	0.45931				20.637	1.43299									9.016	0.487031			53.455	2.88756				14.774	1.10801			90.465	6.7846
				142.263	1.60941			132.389	1.4977								21.573	0.533845				21.666	1.50445									13.992	0.755827			49.541	2.67613				15.504	1.16275			104.458	7.83404
				83.244	0.941731			147.676	1.67064								28.525	0.705879				21.421	1.48743									19.637	1.06076			72.463	3.91434				12.026	0.901914			76.621	5.74634
				108.356	1.22582			138.983	1.5723								26.486	0.655422				21.871	1.51868									16.015	0.865106			11.228	0.60652				12.191	0.914288			52.395	3.92947
				98.593	1.11537			130.821	1.47996								22.575	0.55864				15.116	1.04963									19.619	1.05979			8.095	0.43728				24.906	1.86787			80.353	6.02623
				79.228	0.896298			138.912	1.5715								10.396	0.257259				18.567	1.28926									14.92	0.805956								16.413	1.23093			95.578	7.16806
				100.291	1.13458			156.555	1.77109								25.385	0.628176				16.939	1.17621									21.411	1.15659								10.816	0.811167			85.787	6.43377
				105.061	1.18854			133.309	1.50811								18.948	0.468887				19.46	1.35127									10.677	0.576755								12.472	0.935362			118.311	8.87297
				17.253	0.195181			132.78	1.50213								27.555	0.681875				16.799	1.16649									20.788	1.12294								9.081	0.681048			93.158	6.98657
				90.098	1.01927			130.722	1.47884								21.901	0.541962				18.637	1.29412									18.207	0.983515								17.183	1.28867			19.968	1.49754
				22.208	0.251237			124.756	1.41135								21.475	0.53142				18.276	1.26905									19.969	1.0787								15.007	1.12548			99.872	7.4901
				25.258	0.285741			171.646	1.94181								16.516	0.408704				17.39	1.20753									19.745	1.0666								11.894	0.892014			84.28	6.32075
				70.602	0.798713			130.771	1.4794								22.591	0.559036				21.719	1.50813									21.349	1.15324								17.122	1.2841			105.611	7.92051
				87.618	0.991213			134.056	1.51656								29.493	0.729833				18.378	1.27613									12.117	0.654542								22.411	1.68076			86.037	6.45252
				91.605	1.03632			136.027	1.53886								22.195	0.549237				5.72	0.397186									12.637	0.682632								12.383	0.928688			89.82	6.73623
				93.717	1.06021			141.545	1.60128								21.492	0.53184				15.642	1.08615									20.314	1.09733								12.572	0.942862			69.129	5.18447
				66.7	0.75457			162.614	1.83964								8.337	0.206307				15.411	1.07011									24.245	1.30968								11.098	0.832317			89.724	6.72903
				105.506	1.19358			150.236	1.6996								22.234	0.550202				17.3	1.20128									23.705	1.28051								17.758	1.3318			116.414	8.7307
				108.535	1.22785												25.05	0.619887				0.765	0.0531201									22.696	1.226								13.743	1.03068			74.642	5.59793
				58.929	0.666658												22.34	0.552825				21.721	1.50826									21.171	1.14363								14.788	1.10906			72.368	5.42738
				87.234	0.986869												22.822	0.564753				17.356	1.20517									11.163	0.603008								11.655	0.87409			102.743	7.70542
				107.318	1.21408												24.522	0.606821				13.704	0.95158									18.997	1.02619								12.856	0.964161			98.687	7.40123
				93.071	1.0529												20.594	0.509619				14.391	0.999284									27.209	1.46979								18.041	1.35302			98.669	7.39988
				92.435	1.04571												25.768	0.637654				10.731	0.74514									15.275	0.825132								15.306	1.1479			54.108	4.05794
				28.332	0.320517												25.849	0.639659				13.193	0.916097									10.083	0.544668								11.07	0.830217			72.964	5.47208
				157.206	1.77845												5.501	0.136128				14.964	1.03907									22.528	1.21693								15.448	1.15855			74.342	5.57543
				102.003	1.15395												24.753	0.612537				14.247	0.989284									10.125	0.546937								14.271	1.07028			72.059	5.40421
				84.902	0.960487												12.551	0.310587				10.135	0.703755									14.568	0.786941								14.518	1.08881			100.078	7.50555
				20.425	0.231066												25.06	0.620134				10.919	0.758194									25.485	1.37666								13.771	1.03278			82.917	6.21853
				107.143	1.2121												21.224	0.525208				18.414	1.27863									15.716	0.848955								19.058	1.42929			73.361	5.50185
				54.147	0.612559												18.411	0.455598				13.225	0.918319									15.032	0.812006								11.67	0.875215			87.343	6.55046
				16.307	0.184479												22.168	0.548569				2.928	0.203315									18.407	0.994318								15.505	1.16283			54.255	4.06896
				56.608	0.6404												26.262	0.649879				19.889	1.38105									13.046	0.704725								14.181	1.06353			70.652	5.29869
																	16.355	0.40472				15.458	1.07337									13.606	0.734976								11.96	0.896964			67.324	5.0491
																	24.89	0.615927				4.734	0.32872									11.408	0.616243								11.439	0.857891			59.813	4.48579
																	20.726	0.512885				15.28	1.06101									15.228	0.822594								10.093	0.756945			69.716	5.22849
																	28.998	0.717584				12.012	0.83409									32.868	1.77548								8.331	0.6248			86.179	6.46317
																	16.069	0.397643				14.476	1.00519									17.665	0.954237								14.842	1.11311			66.959	5.02172
																	20.807	0.514889				11.562	0.802843									31.602	1.70709								11.117	0.833742			48.825	3.66173
																	23.831	0.589721				8.951	0.62154									22.375	1.20866								10.762	0.807118			33.831	2.53722
																	9.972	0.246767				11.932	0.828535									13.309	0.718932								10.825	0.811842			34.079	2.55582
																	21.238	0.525555				13.733	0.953593									25.57	1.38125								11.899	0.892389			47.966	3.59731
																	17.473	0.432386				11.806	0.819786									13.211	0.713638								13.449	1.00863			78.098	5.85711
																	17.129	0.423874				11.944	0.829369									16.37	0.884283								10.987	0.823992			24.879	1.86585
																	12.599	0.311774				11.919	0.827633									18.688	1.0095								17.03	1.2772			47.099	3.53228
																	21.566	0.533672				10.297	0.715004									16.098	0.86959								13.721	1.02903			43.46	3.25937
																	16.955	0.419568				6.776	0.470512									12.667	0.684252								15.433	1.15743			50.378	3.7782
																	18.122	0.448446				11.814	0.820342									17.026	0.919719								12.167	0.912488			77.571	5.81759
																	20.718	0.512687				3.251	0.225743									17.302	0.934628								13.943	1.04568			24.003	1.80015
																	16.034	0.396777				10.151	0.704866									18.345	0.990969								11.391	0.854291			79.889	5.99143
																	12.269	0.303608				9.026	0.626748									16.858	0.910644								18.564	1.39224			48.887	3.66638
																	13.888	0.343672				11.229	0.77972									17.302	0.934628								11.097	0.832242			53.712	4.02824
																	9.585	0.23719				12.66	0.879086									19.036	1.0283								14.921	1.11903			43.984	3.29867
																	12.608	0.311997				10.501	0.729169									12.829	0.693003								13.639	1.02288			115.35	8.6509
																	11.18	0.27666				10.549	0.732502									12.496	0.675015								8.739	0.655399			74.618	5.59613
																	9.643	0.238625				5.36	0.372188									12.596	0.680417								11.937	0.895239			59.271	4.44515
																	13.004	0.321797				11.601	0.805551									19.366	1.04612								13.249	0.993635			102.072	7.65509
																	8.55	0.211578				11.624	0.807148									23.642	1.27711								13.535	1.01508			59.387	4.45385
																	7.642	0.189109				10.578	0.734516									12.368	0.668101								14.505	1.08783			74.975	5.6229
																	10.758	0.266217				7.483	0.519605									15.832	0.855221								12.818	0.961311			96.439	7.23263
																	13.286	0.328775				5.642	0.39177									7.8	0.421344								14.44	1.08296			73.964	5.54708
																	10.706	0.26493				10.463	0.726531									18.911	1.02154								13.313	0.998435			84.597	6.34452
																	11.101	0.274705				9.773	0.678618									23.134	1.24966								11.644	0.873265			73.728	5.52938
																	10.848	0.268444				10.8	0.749931									16.477	0.890063								12.822	0.961611			80.752	6.05616
																	15.498	0.383513				8.153	0.566129									13.209	0.71353								16.659	1.24937			66.562	4.99195
																	12.752	0.315561				10.124	0.702991									10.146	0.548072								13.777	1.03323			78.713	5.90324
																	13.71	0.339267														14.067	0.759878								11.843	0.888189			128.855	9.66374
																	12.903	0.319297														15.925	0.860245								12.457	0.934237			77.763	5.83199
																	12.281	0.303905														18.844	1.01792								8.116	0.608676			83.635	6.27237
																	12.019	0.297422														15.19	0.820541								10.275	0.770594			83.019	6.22617
																	14.267	0.353051														18.83	1.01717								13.53	1.01471			62.42	4.68131
																	13.19	0.326399														24.842	1.34193								13.585	1.01883			102.134	7.65974
																	14.162	0.350452														16.894	0.912588								15.029	1.12713			78.742	5.90541
																	13.977	0.345874														16.931	0.914587								16.809	1.26062			56.24	4.21783
																	12.561	0.310834														14.601	0.788724								17.129	1.28462			97.514	7.31326
																	12.027	0.29762														17.555	0.948295								12.119	0.908888			56.655	4.24895
																	12.131	0.300193														14.448	0.780459								13.816	1.03616			50.214	3.7659
																	11.851	0.293265														14.308	0.772897								12.407	0.930488			60.025	4.50169
																	9.29	0.22989														16.855	0.910482								15.471	1.16028			134.951	10.1209
																	12.615	0.31217														14.679	0.792937								15.228	1.14205			68.425	5.13167
																	10.19	0.252161														13.901	0.750911								12.616	0.946162			107.14	8.03518
																	8.91	0.220487														18.582	1.00377								18.362	1.37709			102.162	7.66184
																	11.738	0.290468														16.193	0.874721								12.543	0.940687			88.114	6.60828
																	9.402	0.232662														17.911	0.967525								17.351	1.30127			96.851	7.26353
																	11.157	0.276091														18.93	1.02257								13.371	1.00278			105.968	7.94728
																	6.236	0.154316														14.897	0.804713								15.251	1.14378			89.798	6.73458
																	13.759	0.34048														20.246	1.09366								15.383	1.15368			109.126	8.18412
																	15.118	0.37411														23.162	1.25118								13.942	1.04561			111.071	8.32999
																	11.907	0.29465														21.319	1.15162								15.139	1.13538			81.577	6.11803
																	15.381	0.380618														18.343	0.990861								13.66	1.02446			91.549	6.8659
																	11.42	0.282599														19.461	1.05125								13.084	0.981261			88.372	6.62763
																	11.147	0.275843														19.962	1.07832								12.242	0.918113			90.232	6.76713
																	9.921	0.245505														17.409	0.940408								13.338	1.00031			62.597	4.69459
																	13.485	0.333699														22.258	1.20234								7.663	0.574702			107.843	8.0879
																	13.01	0.321945														22.044	1.19078								18.676	1.40064			87.087	6.53126
																	11.429	0.282822														19.912	1.07562								6.164	0.462281			54.142	4.06049
																	11.203	0.277229														21.973	1.18695								22.971	1.72276			121.756	9.13133
																	12.108	0.299624														19.682	1.06319								16.477	1.23573			108.713	8.15315
																	9.195	0.227539														24.339	1.31476								22.454	1.68398			61.058	4.57917
																	11.167	0.276338														25.729	1.38984								19.786	1.48389			72.335	5.42491
																	10.821	0.267776														29.047	1.56908								9.827	0.736995			116.874	8.7652
																	12.366	0.306009														15.071	0.814113								19.7	1.47744			77.231	5.79209
																	3.609	0.0893082														21.17	1.14357								15.722	1.1791			90.237	6.7675
																	10.946	0.270869														23.984	1.29558								21.421	1.60651			96.074	7.20526
																	12.018	0.297397														24.205	1.30752								17.401	1.30502			69.954	5.24634
																	8.07	0.1997														22.51	1.21596								22.08	1.65593			67.468	5.0599
																	9.646	0.2387														22.354	1.20753								20.546	1.54089			66.512	4.9882
																	9.781	0.24204														20.72	1.11926								17.114	1.2835			95.422	7.15636
																	10.593	0.262134														15.34	0.828644								10.272	0.770369			87.072	6.53014
																	12.568	0.311007														12.5	0.675231								10.851	0.813792			120.427	9.03166
																	11.787	0.291681														13.533	0.731032								16.564	1.24225			106.278	7.97053
																	11.062	0.27374														9.769	0.527707								17.468	1.31005			111.655	8.37379
																	7.93	0.196236														21.35	1.15329								4.363	0.327212			62.654	4.69886
																	9.5	0.235087														16.367	0.884121								19.141	1.43552			94.952	7.12111
																	10.067	0.249118														22.933	1.23881								18.883	1.41617			82.968	6.22235
																	12.164	0.30101														28.475	1.53818								18.138	1.3603			85.664	6.42454
																	12.026	0.297595														13.759	0.74324								19.021	1.42652			87.519	6.56366
																	8.561	0.21185														22.45	1.21272								17.651	1.32377			95.485	7.16109
																	9.249	0.228875														22.376	1.20872								16.71	1.2532			66.254	4.96885
																	6.946	0.171886														10.483	0.566276								14.128	1.05956			97.454	7.30876
																	11.436	0.282995														20.131	1.08745								15.481	1.16103			71.057	5.32906
																	9.293	0.229964														17.462	0.943271								12.283	0.921188			55.635	4.17246
																	9.315	0.230509														21.494	1.16107								17.366	1.3024			106.436	7.98238
																	11.285	0.279258														22.433	1.2118								16.801	1.26002			55.472	4.16023
																	9.216	0.228059														24.347	1.31519								19.354	1.45149			104.898	7.86703
																	9.564	0.23667														19.875	1.07362								18.895	1.41707			57.207	4.29035
																	8.19	0.20267														19.682	1.06319								16.224	1.21675			116.377	8.72792
																																22.353	1.20748								18.792	1.40934			87.054	6.52879
																																20.031	1.08204								19.342	1.45059			62.964	4.72211
																																18.231	0.984811								14.87	1.11521			99.041	7.42778
																																14.222	0.768251								18.284	1.37124			113.427	8.50668
																																17.279	0.933386								12.542	0.940612			63	4.72481
																																20.655	1.11575								16.747	1.25597			99.364	7.452
																																20.837	1.12558								16.527	1.23948			39.295	2.94701
																																19.047	1.02889								16.797	1.25972			63.918	4.79366
																																19.953	1.07783								21.014	1.57599			115.548	8.66575
																																21.183	1.14427								20.742	1.55559			63.637	4.77258
																																20.933	1.13077								18.43	1.38219			55.878	4.19068
																																15.608	0.843121								16.188	1.21405			36.93	2.76964
																																12.506	0.675555								17.494	1.312			94.866	7.11466
																																12.732	0.687763								12.739	0.955387			106.469	7.98485
																																18.334	0.990375								17.753	1.33142			39.373	2.95286
																																12.113	0.654326								14.305	1.07283			75.987	5.6988
																																7.014	0.378886								14.704	1.10276			53.219	3.99126
																																11.363	0.613812								16.655	1.24907			41.517	3.11365
																																22.655	1.22379								12.901	0.967536			79.503	5.96249
																																9.146	0.494053								29.682	2.22606			97.917	7.34348
																																31.736	1.71433								16.246	1.2184			59.837	4.48759
																																12.845	0.693868								14.654	1.09901			86.138	6.46009
																																8.951	0.48352								16.2	1.21495			116.945	8.77052
																																16.616	0.897571								16.753	1.25642			90.776	6.80793
																																28.929	1.5627								9.197	0.689747			20.125	1.50931
																																20.903	1.12915								17.346	1.3009			101.116	7.5834
																																9.125	0.492919								18.573	1.39292			85.301	6.39732
																																13.729	0.74162								18.158	1.3618			107.944	8.09547
																																29.546	1.59603								20.425	1.53181			61.901	4.64239
																																7.631	0.412215								18.888	1.41654			66.676	5.0005
																																11.348	0.613002								16.585	1.24383			85.204	6.39004
																																23.215	1.25404								15.315	1.14858			89.571	6.71756
																																8.202	0.44306								16.061	1.20453			58.321	4.3739
																																26.474	1.43009								13.224	0.99176			116.838	8.7625
																																33.205	1.79368								10.06	0.75447			126.394	9.47917
																																17.417	0.94084								19.036	1.42764			53.879	4.04076
																																21.69	1.17166								16.077	1.20573			106.459	7.9841
																																28.221	1.52446								15.094	1.132			121.318	9.09848
																																38.683	2.0896								11.063	0.829692			81.385	6.10363
																																28.587	1.54423								14.789	1.10913			93.985	7.04859
																																19.64	1.06092								13.726	1.02941			82.56	6.19175
																																33.205	1.79368								18.117	1.35872			116.851	8.76347
																																28.471	1.53796								23.002	1.72508			80.346	6.02571
																																31.778	1.7166								15.529	1.16463			98.918	7.41855
																																26.774	1.44629								17.679	1.32587			58.289	4.3715
																																30.655	1.65594								18.578	1.39329			88.719	6.65366
																																33.378	1.80303								13.879	1.04088			125.483	9.41085
																																26.073	1.40842								14.036	1.05266			59.177	4.4381
																																21.837	1.1796								11.342	0.850616			156.888	11.7661
																																32.483	1.75468								15.35	1.1512			114.428	8.58176
																																10.828	0.584912								17.018	1.2763			77.563	5.81699
																																33.775	1.82447								28.758	2.15676			47.571	3.56768
																																23.966	1.29461								16.189	1.21413			61.485	4.61119
																																20.111	1.08637								16.679	1.25087			38.064	2.85469
																																12.157	0.656703								10.839	0.812892			77.87	5.84002
																																26.034	1.40632								14.782	1.10861			44.184	3.31367
																																17.499	0.94527								14.439	1.08288			65.485	4.91118
																																17.978	0.971144								19.669	1.47512			37.667	2.82491
																																17.587	0.950023								16.75	1.2562			24.701	1.8525
																																15.223	0.822324								16.89	1.2667			39.042	2.92803
																																14.328	0.773977								18.012	1.35085			21.438	1.60779
																																19.083	1.03083								16.766	1.2574			65.166	4.88725
																																20.53	1.109								17.916	1.34365			63.242	4.74296
																																14.407	0.778244								16.471	1.23528			36.928	2.76949
																																20.397	1.10182								15.823	1.18668			29.401	2.20499
																																16.714	0.902865								22.138	1.66028			32.459	2.43433
																																9.026	0.487571								11.475	0.86059			40.303	3.0226
																																15.037	0.812276								21.24	1.59294			40.524	3.03918
																																19.59	1.05822								17.394	1.3045			42.18	3.16337
																																22.066	1.19197								21.231	1.59226			54.887	4.11636
																																14.707	0.79445								18.666	1.39989			51.804	3.88514
																																14.245	0.769493								16.374	1.228			31.364	2.35221
																																22.883	1.23611								19.989	1.49911			63.655	4.77393
																																16.367	0.884121								14.305	1.07283			37.782	2.83354
																																16.834	0.909347								21.1	1.58244			29.586	2.21886
																																22.938	1.23908								14.69	1.10171			54.602	4.09499
																																23.772	1.28413								14.749	1.10613			59.199	4.43975
																																6.484	0.350256								18.33	1.37469			60.28	4.52082
																																20.916	1.12985								13.035	0.977586			52.892	3.96674
																																24.829	1.34123								14.404	1.08026			83.394	6.2543
																																15.129	0.817246								9.794	0.73452			50.734	3.8049
																																21.855	1.18057								12.967	0.972486			35.64	2.67289
																																21.47	1.15978								15.805	1.18533			66.221	4.96638
																																22.177	1.19797								16.444	1.23325			65.182	4.88845
																																18.25	0.985837								21.851	1.63876			85.953	6.44622
																																21.99	1.18787								14.438	1.08281			106.131	7.95951
																																23.857	1.28872								17.12	1.28395			79.546	5.96571
																																29.028	1.56805								18.765	1.40732			85.943	6.44547
																																18.549	1.00199								18.269	1.37012			82.058	6.1541
																																19.713	1.06487								18.923	1.41917			57.301	4.2974
																																30.895	1.6689								18.193	1.36442			74.493	5.58675
																																31.406	1.6965								24.952	1.87132			51.782	3.88349
																																31.537	1.70358								18.008	1.35055			68.076	5.10549
																																18.617	1.00566								35.671	2.67522			64.484	4.83611
																																34.177	1.84619								16.869	1.26512			91.735	6.87985
																																20.753	1.12105								17.043	1.27817			58.038	4.35268
																																31.165	1.68349								18.01	1.3507			115.253	8.64363
																																24	1.29644								14.258	1.06931			99.775	7.48282
																																26.759	1.44548								19.593	1.46942			52.982	3.97349
																																28.133	1.5197								17.671	1.32527			98.444	7.383
																																28.469	1.53785								12.984	0.973761			105.184	7.88848
																																24.927	1.34652								5.326	0.399434			93.418	7.00607
																																42.563	2.29919								17.974	1.348			75.478	5.66062
																																23.745	1.28267								18.877	1.41572			105.039	7.87761
																																28.249	1.52597								22.319	1.67386			87.61	6.57049
																																25.116	1.35673								18.836	1.41264			66.097	4.95708
																																21.513	1.1621								19.711	1.47827			80.379	6.02818
																																27.11	1.46444								32.281	2.42098			86.359	6.47666
																																25.44	1.37423								17.557	1.31672			98.898	7.41705
																																25.442	1.37434								21.18	1.58844			95.116	7.13341
																																22.911	1.23762								17.709	1.32812			91.27	6.84497
																																15.157	0.818758								9.965	0.747345			88.827	6.66176
																																16.458	0.889036								19.172	1.43784			95.556	7.16641
																																17.772	0.960017								23.261	1.7445			69.769	5.23246
																																8.535	0.461048												95.859	7.18914
																																27.035	1.46039												113.101	8.48223
																																9.509	0.513662												82.614	6.1958
																																10.286	0.555634												68.501	5.13737
																																17.506	0.945648												17.298	1.2973
																																27.093	1.46352												104.311	7.82301
																																16.048	0.866889												104.167	7.81221
																																10.223	0.552231												53.718	4.02869
																																13.329	0.720012												93.951	7.04604
																																22.149	1.19646												66.886	5.01625
																																16.121	0.870832												96.954	7.27126
																																14.883	0.803957												73.649	5.52345
																																14.93	0.806496												67.916	5.0935
																																13.637	0.73665												99.467	7.45973
																																12.166	0.657189												78.567	5.89229
																																10.326	0.557795												89.126	6.68418
																																14.885	0.804065												95.638	7.17256
																																10.745	0.580429												54.412	4.08074
																																16.643	0.89903												86.599	6.49466
																																13.68	0.738973												65.919	4.94373
																																7.151	0.386286												147.629	11.0717
																																12.648	0.683226												71.203	5.34001
																																16.35	0.883202												62.329	4.67449
																																15.83	0.855113												95.526	7.16416
																																11.788	0.63677												7.53	0.564727
																																11.45	0.618512												110.669	8.29984
																																20.439	1.10408												121.052	9.07854
																																13.618	0.735624												82.576	6.19295
																																14.011	0.756853												99.782	7.48335
																																19.364	1.04601												119.337	8.94992
																																19.829	1.07113												123.356	9.25133
																																17.655	0.953696												74.241	5.56785
																																18.743	1.01247												134.205	10.065
																																12.892	0.696406												162.654	12.1986
																																15.778	0.852304												61.495	4.61194
																																17.657	0.953805												123.77	9.28238
																																15.741	0.850305												84.006	6.3002
																																17.538	0.947376												104.706	7.85263
																																19.894	1.07464												70.055	5.25391
																																21.292	1.15016												101.222	7.59134
																																16.081	0.868671												123.587	9.26865
																																23.736	1.28218												66.474	4.98535
																																16.445	0.888334												87.721	6.57881
																																25.042	1.35273												143.684	10.7759
																																24.121	1.30298												107.897	8.09195
																																21.244	1.14757												94.753	7.10619
																																19.917	1.07589												119.451	8.95847
																																15.818	0.854465												74.933	5.61975
																																29.113	1.57264												79.035	5.92739
																																18.628	1.00626												103.534	7.76474
																																28.665	1.54844												87.548	6.56584
																																25.289	1.36607												81.399	6.10468
																																21.243	1.14751												137.823	10.3363
																																17.976	0.971036												85.289	6.39642
																																28.392	1.53369												99.262	7.44435
																																31.932	1.72492												93.352	7.00112
																																21.248	1.14778												88.22	6.61623
																																26.902	1.45321												93.14	6.98522
																																17.696	0.955911												78.555	5.89139
																																12.826	0.692841												97.516	7.31341
																																14.37	0.776246												95.605	7.17009
																																20.96	1.13223												101.129	7.58437
																																24.652	1.33166												94.779	7.10814
																																19.96	1.07821												105.976	7.94788
																																30.602	1.65307												150.431	11.2819
																																25.176	1.35997												82.188	6.16385
																																19.476	1.05206												129.792	9.73401
																																26.065	1.40799												97.079	7.28063
																																27.867	1.50533												97.67	7.32496
																																15.378	0.830696												18.298	1.37229
																																20.272	1.09506												73.368	5.50238
																																16.459	0.88909												102.063	7.65442
																																25.463	1.37547												69.161	5.18687
																																21.592	1.16637												98.596	7.3944
																																27.177	1.46806												102.989	7.72386
																																34.686	1.87369												148.034	11.1021
																																22.613	1.22152												58.035	4.35245
																																24.532	1.32518												68.013	5.10077
																																10.702	0.578106												59.444	4.45812
																																17.684	0.955263												75.979	5.6982
																																20.909	1.12947												44.342	3.32552
																																21.595	1.16653												102.705	7.70257
																																27.242	1.47157												68.336	5.12499
																																20.239	1.09328												68.832	5.16219
																																21.818	1.17858												76.089	5.70645
																																23.571	1.27327												54.198	4.06469
																																16.422	0.887092												82.118	6.1586
																																23.093	1.24745												88.105	6.60761
																																31.911	1.72378												117.991	8.84897
																																22.262	1.20256												65.696	4.927
																																21.433	1.15778												78.717	5.90354
																																17.912	0.967579												106.489	7.98635
																																29.531	1.59522												87.353	6.55121
																																19.466	1.05152												61.617	4.62109
																																22.068	1.19208												92.691	6.95155
																																24.546	1.32594												81.954	6.1463
																																26.798	1.44759												128.68	9.65061
																																23.692	1.27981												139.134	10.4346
																																19.985	1.07956												118.188	8.86374
																																25.387	1.37137												102.004	7.64999
																																25.446	1.37455												114.411	8.58048
																																26.311	1.42128												75.086	5.63122
																																21.767	1.17582												66.345	4.97568
																																16.211	0.875694												102.058	7.65404
																																16.343	0.882824												92.084	6.90602
																																18.558	1.00248												112.724	8.45396
																																18.047	0.974872												70.784	5.30859
																																8.603	0.464721												50.478	3.7857
																																25.724	1.38957												69.607	5.22032
																																9.761	0.527275												75.474	5.66032
																																11.098	0.599497												59.392	4.45422
																																24.175	1.3059												55.952	4.19623
																																18.446	0.996425												86.527	6.48926
																																10.623	0.573838												68.742	5.15544
																																16.339	0.882608												165.255	12.3936
																																14.776	0.798177												71.785	5.38366
																																21.424	1.15729												65.477	4.91058
																																17.475	0.943973												150.712	11.3029
																																15.65	0.845389												94.966	7.12216
																																15.814	0.854248												7.918	0.593826
																																14.811	0.800068												107.878	8.09052
																																13.504	0.729466												118.239	8.86757
																																11.678	0.630828												80.418	6.03111
																																14.779	0.798339												96.653	7.24868
																																12.522	0.67642												114.657	8.59893
																																16.472	0.889793												121.578	9.11798
																																7.85	0.424045												74.756	5.60647
																																13.148	0.710235												133.643	10.0228
																																11.233	0.60679												157.328	11.7991
																																12.81	0.691977												59.793	4.48429
																																17.363	0.937923												119.063	8.92937
																																12.709	0.686521												82.515	6.18838
																																16.583	0.895789												102.751	7.70602
																																12.201	0.65908												67.832	5.0872
																																19.391	1.04747												98.557	7.39148
																																13.631	0.736326												119.92	8.99364
																																19.407	1.04834												62.716	4.70351
																																13.64	0.736812												82.313	6.17323
																																21.253	1.14806												140.196	10.5143
																																10.817	0.584318												105.765	7.93206
																																16.836	0.909455												90.012	6.75063
																																17.127	0.925175												116.444	8.73295
																																20.898	1.12888												71.431	5.35711
																																15.488	0.836638												75.624	5.67157
																																19.597	1.0586												102.818	7.71104
																																15.808	0.853924												85.811	6.43557
																																8.453	0.456618												78.412	5.88066
																																17.993	0.971955												132.879	9.96552
																																19.616	1.05963												82.043	6.15298
																																20.03	1.08199												94.988	7.12381
																																33.641	1.81724												89.166	6.68718
																																16.868	0.911184												84.169	6.31242
																																16.159	0.872885												88.879	6.66566
																																12.279	0.663293												77.7	5.82727
																																18.413	0.994643												93.639	7.02264
																																15.52	0.838367												93.351	7.00104
																																17.412	0.94057												94.666	7.09966
																																16.247	0.877638												94.301	7.07229
																																17.714	0.956884												101.449	7.60837
																																23.143	1.25015												90.787	6.80875
																																15.969	0.862621												88.888	6.66633
																																20.676	1.11689												88.783	6.65846
																																21.123	1.14103												96.695	7.25183
																																14.789	0.798879												70.411	5.28061
																																17.149	0.926363												95.627	7.17174
																																18.652	1.00755												112.485	8.43604
																																17.99	0.971793												17.421	1.30652
																																24.967	1.34868												67.473	5.06027
																																14.972	0.808765												102.45	7.68344
																																14.59	0.78813												103.094	7.73174
																																6.643	0.358845												95.389	7.15389
																																20.06	1.08361												53.691	4.02666
																																10.952	0.591611												68.686	5.15124
																																15.371	0.830318												98.421	7.38128
																																12.743	0.688358												71.438	5.35763
																																8.289	0.447759												99.378	7.45305
																																20.92	1.13007												79.924	5.99406
																																26.34	1.42285												97.786	7.33366
																																17.211	0.929712												97.508	7.31281
																																27.259	1.47249												144.601	10.8446
																																24.453	1.32091												103.972	7.79759
																																16.637	0.898706												16.101	1.20753
																																22.204	1.19943												88.604	6.64503
																																19.411	1.04855												98.447	7.38323
																																15.663	0.846092												124.346	9.32558
																																26.664	1.44035												112.395	8.42929
																																23.237	1.25523												81.257	6.09403
																																18.488	0.998694												126.856	9.51382
																																16.307	0.88088												97.397	7.30448
																																18.295	0.988268												23.784	1.78373
																																20.538	1.10943												82.527	6.18928
																																23.866	1.28921												49.964	3.74715
																																16.828	0.909023												114.007	8.55018
																																21.152	1.1426												78.512	5.88816
																																22.423	1.21126												104.745	7.85556
																																21.727	1.17366												62.863	4.71454
																																16.199	0.875046												10.321	0.774044
																																16.61	0.897247												97.639	7.32263
																																19.474	1.05196												92.293	6.9217
																																22.018	1.18938												78.007	5.85029
																																23.988	1.2958												72.166	5.41223
																																28.399	1.53407												78.572	5.89266
																																21.644	1.16918												127.882	9.59076
																																20.861	1.12688												93.542	7.01537
																																17.48	0.944243												95.27	7.14496
																																17.667	0.954345												86.48	6.48574
																																18.057	0.975412												117.263	8.79437
																																27.963	1.51052												89.102	6.68238
																																18.751	1.0129												117.46	8.80915
																																20.938	1.13104												140.512	10.538
																																14.834	0.80131												69.862	5.23944
																																14.631	0.790345												110.939	8.32009
																																20.962	1.13234												102.85	7.71344
																																30.222	1.63255												99.298	7.44705
																																17.167	0.927335												95.561	7.16679
																																24.409	1.31854												90.831	6.81205
																																33.494	1.8093												88.694	6.65178
																																17.875	0.965581												12.696	0.952162
																																22	1.18841												107.339	8.0501
																																16.207	0.875478												107.468	8.05978
																																37.677	2.03525												80.638	6.04761
																																29.842	1.61202												87.003	6.52496
																																19.185	1.03634												85.659	6.42417
																																31.034	1.67641												84.646	6.34819
																																25.947	1.40162												60.739	4.55524
																																21.766	1.17577												102.788	7.70879
																																18.118	0.978707												83.436	6.25745
																																29.595	1.59868												52.159	3.91177
																																34.569	1.86737												114.836	8.61235
																																22.603	1.22098												103.605	7.77006
																																28.581	1.5439												57.924	4.34413
																																19.859	1.07275												107.415	8.0558
																																17.182	0.928146												69.12	5.18379
																																24.986	1.34971												72.326	5.42423
																																23.602	1.27494												85.819	6.43617
																																24.368	1.31632												92.793	6.9592
																																33.436	1.80616												65.312	4.8982
																																26.072	1.40837												62.865	4.71469
																																20.602	1.11289												61.815	4.63594
																																27.152	1.46671												107.484	8.06098
																																27.723	1.49755												81.115	6.08338
																																17.36	0.937761												83.232	6.24215
																																21.994	1.18808												86.319	6.47366
																																17.151	0.926471												61.367	4.60234
																																25.748	1.39087												105.454	7.90873
																																22.934	1.23886												51.519	3.86377
																																27.318	1.47568												116.547	8.74067
																																34.725	1.87579												95.29	7.14646
																																24.039	1.29855												109.71	8.22792
																																20.712	1.11883												58.14	4.36032
																																24.406	1.31838												72.186	5.41373
																																11.762	0.635366												113.702	8.52731
																																19.141	1.03397												75.789	5.68395
																																20.261	1.09447												89.333	6.69971
																																21.106	1.14011												96.678	7.25056
																																29.953	1.61802												66.194	4.96435
																																25.22	1.36235												67.216	5.041
																																23.18	1.25215												63.614	4.77086
																																26.496	1.43127												92.729	6.9544
																																18.06	0.975574												83.669	6.27492
																																24.122	1.30303												117.906	8.84259
																																35.567	1.92128												103.775	7.78281
																																25.128	1.35738												112.666	8.44961
																																24.331	1.31432												61.705	4.62769
																																20.668	1.11645												90.715	6.80335
																																33.203	1.79358												82.666	6.1997
																																21.69	1.17166												87.604	6.57004
																																23.604	1.27505												85.3	6.39724
																																28.21	1.52386												94.868	7.11481
																																32.497	1.75544												66.635	4.99742
																																27.52	1.48659												97.267	7.29473
																																23.453	1.2669												71.564	5.36708
																																29.875	1.6138												54.709	4.10301
																																28.113	1.51862												104.613	7.84566
																																27.531	1.48718												55.475	4.16046
																																17.726	0.957532												104.392	7.82909
																																23.834	1.28748												117.553	8.81612
																																18.62	1.00582												57.605	4.3202
																																29.695	1.60408												86.351	6.47606
																																9.134	0.493405												58.416	4.38102
																																18.648	1.00734												99.317	7.44848
																																28.445	1.53656												112.649	8.44834
																																16.526	0.89271												62.265	4.66969
																																10.224	0.552285												100.122	7.50885
																																23.16	1.25107												63.898	4.79216
																																15.819	0.854519												39.649	2.97356
																																14.694	0.793748												113.043	8.47788
																																16.468	0.889577												63.372	4.75271
																																19.148	1.03435												56.836	4.26253
																																19.444	1.05034												95.658	7.17406
																																19.085	1.03094												104.576	7.84288
																																15.072	0.814167												39.326	2.94933
																																13.931	0.752532												76.784	5.75857
																																26.023	1.40572												52.876	3.96554
																																12.048	0.650815												41.983	3.1486
																																14.862	0.802823												81.876	6.14045
																																9.701	0.524033												96.889	7.26638
																																8.303	0.448516												61.005	4.57519
																																13.05	0.704941												87.072	6.53014
																																14.07	0.76004												116.998	8.7745
																																13.043	0.704563												92.085	6.9061
																																21.506	1.16172												19.295	1.44707
																																14.971	0.808711												100.885	7.56607
																																11.05	0.596904												85.263	6.39447
																																12.525	0.676582												107.79	8.08393
																																13.05	0.704941												60.904	4.56762
																																9.839	0.531488												68.266	5.11974
																																17.008	0.918747												86.401	6.47981
																																13.698	0.739945												89.607	6.72025
																																15.539	0.839393												59.84	4.48782
																																15.215	0.821891												116.814	8.7607
																																14.043	0.758582												126.167	9.46214
																																13.739	0.74216												54.777	4.10811
																																10.343	0.558713												103.969	7.79736
																																16.922	0.914101												124.085	9.306
																																14.247	0.769601												80.177	6.01303
																																19.18	1.03607												96.893	7.26668
																																20.402	1.10209												83.454	6.2588
																																18.844	1.01792												118.216	8.86584
																																13.913	0.751559												80.396	6.02946
																																10.939	0.590908												100.399	7.52962
																																14.466	0.781432												88.838	6.66258
																																12.105	0.653894												60.512	4.53822
																																16.752	0.904918												60.566	4.54227
																																15.333	0.828266												128.903	9.66734
																																13.41	0.724388												168.033	12.602
																																15.172	0.819569												117.505	8.81252
																																14.321	0.773599												88.124	6.60903
																																21.675	1.17085												77.308	5.79787
																																14.946	0.80736												56.434	4.23238
																																11.701	0.63207												77.881	5.84084
																																26.276	1.41939												88.849	6.66341
																																12.529	0.676798												109.731	8.22949
																																15.828	0.855005												18.989	1.42412
																																14.567	0.786887												104.164	7.81199
																																15.611	0.843283												81.848	6.13835
																																15.537	0.839285												90.392	6.77913
																																16.762	0.905458												56.072	4.20523
																																14.283	0.771546												41.95	3.14612
																																14.935	0.806766												62.612	4.69571
																																16.303	0.880663												85.119	6.38367
																																15.493	0.836909												86.319	6.47366
																																16.189	0.874505												54.294	4.07189
																																10.528	0.568707												114.262	8.56931
																																13.076	0.706346												128.51	9.63786
																																10.865	0.586911												54.246	4.06829
																																10.896	0.588586												102.974	7.72274
																																15.401	0.831939												119.742	8.98029
																																12.803	0.691599												79.964	5.99706
																																9.921	0.535917												95.706	7.17766
																																11.389	0.615217												88.099	6.60716
																																14.794	0.79915												117.37	8.8024
																																13.195	0.712774												82.989	6.22392
																																16.433	0.887686												103.946	7.79564
																																19.024	1.02765												62.699	4.70224
																																14.695	0.793802												92.339	6.92515
																																13.634	0.736488												62.92	4.71881
																																12.541	0.677446												64.653	4.84878
																																12.528	0.676744												129.337	9.69989
																																16.122	0.870886												169.346	12.7004
																																8.083	0.436631												121.269	9.09481
																																10.96	0.592043												89.18	6.68823
																																12.642	0.682902												59.363	4.45205
																																8.063	0.435551												80.983	6.07348
																																9.748	0.526572												74.398	5.57963
																																15.001	0.810331												54.433	4.08231
																																16.322	0.88169												100.649	7.54837
																																13.433	0.72563												122.425	9.18151
																																17.567	0.948943												131.222	9.84125
																																7.534	0.406975												150.808	11.3101
																																11.681	0.63099												79.438	5.95761
																																8.781	0.474336												119.226	8.94159
																																11.753	0.634879												68.917	5.16857
																																13.227	0.714503												58.369	4.3775
																																16.709	0.902595												118.745	8.90552
																																12.334	0.666264												137.262	10.2942
																																14.544	0.785645												120.246	9.01809
																																15.059	0.813464												130.907	9.81763
																																20.073	1.08431												106.559	7.9916
																																15.378	0.830696												96.666	7.24966
																																12.316	0.665292												141.052	10.5785
																																9.482	0.512203												146.604	10.9949
																																15.062	0.813627												104.628	7.84678
																																16.04	0.866457												153.081	11.4806
																																15.636	0.844633												110.74	8.30517
																																24.795	1.33939												64.38	4.82831
																																21.687	1.1715												124.23	9.31688
																																18.243	0.985459												13.695	1.02708
																																13.693	0.739675												67.534	5.06485
																																13.555	0.732221												120.496	9.03684
																																11.354	0.613326												98.485	7.38608
																																17.004	0.91853												104.249	7.81836
																																17.809	0.962015												136.528	10.2392
																																8.914	0.481521
																																18.259	0.986324
																																14.749	0.796719
																																11.287	0.609707
																																17.732	0.957856
																																16.75	0.90481
																																11.111	0.600199
																																16.658	0.89984
																																10.357	0.55947
																																17.922	0.968119
																																19.333	1.04434
																																21.903	1.18317
																																21.171	1.14363
																																20.641	1.115
																																16.525	0.892656
																																13.446	0.726333
																																18.499	0.999288
																																14.272	0.770952
																																21.22	1.14627
																																19.309	1.04304
																																19.765	1.06768
																																9.931	0.536458
																																9.522	0.514364
																																19.402	1.04807
																																17.302	0.934628
																																16.443	0.888226
																																15.373	0.830426
																																12.247	0.661564
																																12.646	0.683118
																																11.25	0.607708
																																14.653	0.791533
																																16.464	0.88936
																																13.729	0.74162
																																18.586	1.00399
																																16.372	0.884391
																																6.813	0.368028
																																19.367	1.04618
																																21.281	1.14957
																																13.715	0.740864
																																18.754	1.01306
																																17.552	0.948133
																																17.61	0.951266
																																16.053	0.867159
																																12.657	0.683712
																																23.315	1.25944
																																8.288	0.447705
																																14.853	0.802337
																																20.243	1.0935
																																19.495	1.05309
																																20.306	1.0969
																																15.423	0.833127
																																10.728	0.57951
																																13.542	0.731518
																																14.932	0.806604
																																12.911	0.697433
																																11.91	0.64336
																																12.973	0.700782
																																7.69	0.415402
																																11.764	0.635474
																																19.517	1.05428
																																15.5	0.837287
																																13.493	0.728872
																																12.808	0.691869
																																12.69	0.685495
																																21.506	1.16172
																																18.19	0.982596
																																11.136	0.60155
																																19.962	1.07832
																																17.045	0.920745
																																15.654	0.845605
																																16.672	0.900596
																																11.274	0.609004
																																18.218	0.984109
																																16.451	0.888658
																																22.026	1.18981
																																9.841	0.531596
																																15.937	0.860893
																																16.117	0.870616
																																15.929	0.860461
																																16.402	0.886011
																																14.602	0.788778
																																10.083	0.544668












































































































[truncated: 188 more columns]

## Sheet: F7D
OTX2 and SOX1 level analysis in hESCs cultured in 3D in YSLC CM for a 5 day period
Unit= fluorescence intensity (a.u.)
			Day 1																													Day 3
				Exp 1	38.7726	1			11.902	0.306968			Exp 2	16.3644	1			11.2848	0.689593			Exp 3	24.3978	1			68.4569	2.80586					Exp 1	26.2578	1			67.3258	2.56403			Exp 2	22.0358	1			36.6074	1.66127
				Control	OTX2	rel OTX2		+ YSLC CM	OTX2	rel OTX2			Control	OTX2	rel OTX2		+ YSLC CM	OTX2	rel OTX2			Control	OTX2	rel OTX2		+ YSLC CM	OTX2	rel OTX2					Control	OTX2	rel OTX2		+ YSLC CM	OTX2	rel OTX2			Control	OTX2	rel OTX2		+ YSLC CM	OTX2	rel OTX2
					65.593	1.69174			14.138	0.364639				15.812	0.966243			22.394	1.36846				41.594	1.70482			54.689	2.24155						43.788	1.66762			41.99	1.59914				21.21	0.962523			49.063	2.22651
					46.926	1.21029			14.739	0.380139				13.328	0.81445			23.141	1.41411				38.241	1.56739			60.398	2.47555						22.539	0.858374			55.627	2.1185				24.575	1.11523			65.288	2.96281
					44.922	1.1586			7.161	0.184692				16.114	0.984698			20.221	1.23567				44.366	1.81844			57.353	2.35074						23.489	0.894554			45.985	1.75129				26.355	1.19601			29.931	1.35829
					40.381	1.04148			7.526	0.194106				13.51	0.825572			20.716	1.26592				38.1	1.56161			63.549	2.6047						39.885	1.51898			70.024	2.66679				19.42	0.881292			15.16	0.687971
					59.465	1.53369			8.675	0.22374				15.724	0.960866			20.291	1.23995				38.749	1.58822			77.942	3.19463						20.43	0.778055			80.607	3.06983				12.138	0.55083			56.642	2.57045
					35.225	0.908502			6.56	0.169192				13.611	0.831744			20.197	1.2342				28.524	1.16912			72.331	2.96465						31.238	1.18967			66.959	2.55006				16.612	0.753863			24.288	1.10221
					58.494	1.50864			11.555	0.29802				16.074	0.982254			23.551	1.43916				29.442	1.20675			63.811	2.61544						27.93	1.06368			66.271	2.52386				15.763	0.715335			45.049	2.04435
					36.431	0.939606			15.6	0.402346				13.022	0.795751			19.448	1.18843				27.727	1.13645			70.342	2.88313						29.307	1.11613			47.163	1.79615				14.357	0.65153			12.174	0.552464
					42.65	1.1			7.449	0.19212				13.436	0.82105			22.126	1.35208				29.826	1.22249			65.102	2.66835						24.203	0.921746			70.521	2.68572				30.213	1.37109			27.513	1.24856
					43.138	1.11259			11.116	0.286697				14.43	0.881792			21.516	1.3148				25.002	1.02476			73.849	3.02687						25.239	0.961201			100.485	3.82686				21.941	0.995697			33.544	1.52225
					31.401	0.809876			12.618	0.325436				14.876	0.909046			25.224	1.54139				29.905	1.22572			69.221	2.83718						24.653	0.938883			110.29	4.20028				29.547	1.34086			30.346	1.37712
					35.854	0.924725			7.2	0.185698				15.019	0.917784			23.245	1.42046				28.367	1.16269			58.453	2.39583						11.651	0.443716			60.874	2.31832				14.565	0.660969			37.348	1.69488
					19.486	0.502571			14.276	0.368198				8.894	0.543496			20.087	1.22748				24.644	1.01009			60.864	2.49465						29.062	1.1068			22.214	0.845997				23.697	1.07539			29.299	1.32961
					42.1	1.08582			12.986	0.334927				16.096	0.983598			10.122	0.618537				21.728	0.890571			68.905	2.82423						15.649	0.595976			16.806	0.640039				30.868	1.40081			33.272	1.5099
					24.708	0.637254			10.11	0.260751				17.192	1.05057			6.846	0.418347				21.006	0.860978			71.932	2.9483						23.909	0.910549			38.566	1.46875				21.628	0.981493			22.724	1.03123
					34.376	0.886605			8.692	0.224179				17.953	1.09708			10.976	0.670724				28.2	1.15584			63.593	2.6065						29.99	1.14214			20.121	0.766287				16.401	0.744288			39.961	1.81346
					51.535	1.32916			13.984	0.360667				13.716	0.83816			12.91	0.788907				25.426	1.04214			76	3.11503						21.755	0.828516			8.103	0.308594				10.384	0.471233			31.109	1.41175
					50.054	1.29096			6.839	0.176387				14.787	0.903607			10.346	0.632226				23.462	0.961643			75.231	3.08351						31.593	1.20319			59.147	2.25255				12.222	0.554642			25.551	1.15952
					41.35	1.06647			7.99	0.206073				14.634	0.894258			8.601	0.525592				30.332	1.24323			76.184	3.12257						18.661	0.710684			107.617	4.09848				37.038	1.68081			25.007	1.13483
					46.959	1.21114			4.629	0.119388				17.947	1.09671			13.894	0.849038				32.601	1.33623			77.723	3.18565						10.646	0.405442			82.206	3.13073				24.814	1.12608			7.067	0.320705
					50.545	1.30363			7.906	0.203907				12.203	0.745704			11.611	0.709528				22.018	0.902457			64.393	2.63929						11.045	0.420637			134.106	5.10728				43.586	1.97796			38.124	1.73009
					43.933	1.13309			9.581	0.247107				13.041	0.796912			14.699	0.89823				23.687	0.970865			75.866	3.10954						20.549	0.782587			109.854	4.18367				23.604	1.07116			18.235	0.827516
					18.184	0.468991			3.174	0.0818619				15.014	0.917479			12.845	0.784935				30.379	1.24515			76.339	3.12893						19.604	0.746598			64.503	2.45653				10.065	0.456756			40.392	1.83301
					13.848	0.357159			11.886	0.306557				15.42	0.942289			11.553	0.705983				32.937	1.35			78.94	3.23553						22.896	0.87197			44.845	1.70787				10.251	0.465197			22.987	1.04316
					39.781	1.02601			10.775	0.277902				15.96	0.975287			12.955	0.791657				36.903	1.51255			74.846	3.06773						15.29	0.582303			61.463	2.34075				18.982	0.861415			56.366	2.55793
					31.988	0.825015			13.3	0.343026				15.451	0.944183			12.393	0.757314				20.705	0.848641			78.189	3.20475						13.784	0.524949			92.631	3.52775				18.584	0.843354			14.187	0.643815
					37.357	0.963489			14.083	0.36322				14.039	0.857898			12.63	0.771797				30.164	1.23634			71.165	2.91686						9.468	0.360579			81.167	3.09116				21.823	0.990342			69.354	3.14733
					12.363	0.318859			11.221	0.289405				16.13	0.985676			13.375	0.817322				22.373	0.917008			82.464	3.37997						21.43	0.816139			11.356	0.432481				28.461	1.29158			32.644	1.48141
					41.97	1.08247			7.853	0.20254				14.071	0.859854			16.743	1.02313				26.067	1.06841			78.439	3.215						15.377	0.585617			78.662	2.99576				28.827	1.30819			43.402	1.96961
					14.417	0.371835			11.501	0.296627				13.682	0.836083			16.337	0.998325				19.983	0.819048			78.411	3.21385						22.104	0.841807			74.93	2.85363				38.967	1.76835			68.963	3.12959
					41.797	1.078			20.029	0.516576				11.839	0.72346			11.087	0.677507				23.431	0.960372			78.6	3.2216						16.395	0.624386			17.17	0.653901				14.077	0.638823			42.508	1.92904
					46.203	1.19164			4.457	0.114952				17.063	1.04269			13.733	0.839199				26.096	1.0696			76.73	3.14495						12.314	0.468966			103.593	3.94523				7.446	0.337904			52.257	2.37146
					41.082	1.05956			10.644	0.274524				17.259	1.05467			11.887	0.726393				20.698	0.848354			72.085	2.95457						22.622	0.861535			77.623	2.95619				9.67	0.438831			42.156	1.91307
					5.591	0.1442			10.617	0.273827				10.175	0.621776			12.416	0.75872				21.179	0.868069			72.889	2.98752						23.574	0.897791			109.187	4.15827				19.598	0.88937			33.763	1.53219
					40.732	1.05054			10.997	0.283628				14.63	0.894013			12.174	0.743931				27.109	1.11112			82.893	3.39756						17.055	0.649522			79.658	3.03369				17.01	0.771925			58.181	2.64029
					39.364	1.01525			9.572	0.246875				13.761	0.84091			10.331	0.631309				18.837	0.772077			81.861	3.35526						18.578	0.707523			100.785	3.83829				21.749	0.986984			39.084	1.77366
					49.583	1.27881			13.393	0.345424				12.956	0.791718			8.582	0.524431				17.442	0.7149			71.371	2.9253						7.273	0.276984			111.126	4.23212				22.306	1.01226			42.264	1.91797
					42.496	1.09603			9.739	0.251182				13.077	0.799112			13.367	0.816834				33.49	1.37266			82.413	3.37788						27.141	1.03364			84.966	3.23584				19.148	0.868949			16.559	0.751458
					39.832	1.02732			8.711	0.224669				14.647	0.895052			13.099	0.800457				18.395	0.753961			89.535	3.66979						24.308	0.925744			50.311	1.91604				18.883	0.856923			28.37	1.28745
					43.156	1.11305			7.567	0.195164				13.007	0.794835			12.377	0.756336				26.184	1.07321			76.701	3.14376						24.227	0.92266			36.995	1.40892				22.775	1.03354			43.678	1.98214
					37.043	0.955391			26.646	0.687238				13.194	0.806262			10.547	0.644508				29.518	1.20986			78.29	3.20889						15.279	0.581885			16.428	0.625643				12.402	0.562811			41.705	1.8926
					44.941	1.15909			9.916	0.255748				14.926	0.912101			10.05	0.614138				26.495	1.08596			64.401	2.63962						25.409	0.967675			29.623	1.12816				8.504	0.385917			40.885	1.85539
					41.626	1.07359			9.494	0.244864				12.197	0.745337			13.941	0.85191				23.916	0.980251			72.221	2.96014						18.73	0.713312			118.735	4.5219				14.354	0.651394			53.689	2.43644
					46.874	1.20895			9.096	0.234599				13.654	0.834372			10.4	0.635525				30.256	1.24011			73.325	3.00539						27.106	1.0323			85.473	3.25515				8.867	0.40239			43.936	1.99384
					48.102	1.24062			10.584	0.272976				12.173	0.74387			11.237	0.686673				22.009	0.902088			63.009	2.58257						15.721	0.598718			106.162	4.04307				15.307	0.694642			89.779	4.07423
					40.854	1.05368			9.127	0.235398				14.803	0.904585			10.315	0.630331				24.61	1.0087			56.348	2.30955						16.123	0.614027			130.179	4.95773				14.604	0.662739			21.987	0.997784
					43.49	1.12167			10.745	0.277129				14.448	0.882892			10.394	0.635159				27.778	1.13854			66.914	2.74262						18.691	0.711827			101.078	3.84945				10.762	0.488386			21.186	0.961434
					40.186	1.03645			11.751	0.303075				16.119	0.985003			11.261	0.68814				18.627	0.76347			63.369	2.59732						19.837	0.755471			84.623	3.22278				15.672	0.711205			43.617	1.97937
					47.524	1.22571			12.376	0.319194				14.294	0.873481			10.597	0.647564				30.075	1.23269			88.381	3.62249						29.638	1.12873			131.039	4.99048				20.165	0.915101			24.155	1.09617
					16.885	0.435488			8.683	0.223947				16.593	1.01397			9.835	0.600999				30.788	1.26192			90.788	3.72115						27.26	1.03817			87.59	3.33577				46.298	2.10103			40.476	1.83683
					42.353	1.09234			6.881	0.177471				14.627	0.89383			14.648	0.895113				27.576	1.13026			74.504	3.05371						14.925	0.568403			94.058	3.5821				20.176	0.9156			27.341	1.24075
					50.895	1.31265			13.611	0.351047				15.454	0.944366			9.531	0.582422				20.528	0.841386			75.034	3.07544						15.256	0.581009			59.059	2.2492				25.59	1.16129			33.483	1.51948
					48.19	1.24289			8.99	0.231865				13.68	0.83596			9.019	0.551135				32.869	1.34721			66.669	2.73258						27.381	1.04278			92.152	3.50951				38.67	1.75487			49.8	2.25996
					49.376	1.27348			10.189	0.262789				15.774	0.963921			9.602	0.586761				20.235	0.829377			68.794	2.81968						12.307	0.468699			78.087	2.97386				17.583	0.797928			37.065	1.68203
					50.851	1.31152			7.563	0.19506				14.425	0.881486			10.67	0.652025				20.023	0.820688			73.387	3.00793						29.156	1.11038			80.994	3.08457				12.122	0.550104			26.681	1.2108
					36.346	0.937414			12.166	0.313778				13.167	0.804612			9.877	0.603566				32.036	1.31307			81.914	3.35743						29.28	1.1151			134.725	5.13086				16.232	0.736619			10.107	0.458662
					28.207	0.727498			11.038	0.284685				15.04	0.919068			8.551	0.522536				26.063	1.06825			75.6	3.09864						14.126	0.537974			9.026	0.343746				12.028	0.545838			4.415	0.200356
					56.286	1.45169			14.119	0.364149				14.711	0.898963			9.329	0.570079				17.916	0.734328			66.144	2.71106						20.772	0.79108			63.765	2.42842				8.488	0.385191			37.588	1.70577
					35.915	0.926298			6.451	0.16638				7.555	0.461673			11.211	0.685084				22.676	0.929427			60.028	2.46038						50.853	1.93668			82.705	3.14973				18.148	0.823568			27.823	1.26263
					53.397	1.37718			11.272	0.290721				13.164	0.804429			9.044	0.552663				19.482	0.798514			66.606	2.73						34.617	1.31835			25.049	0.953965				17.596	0.798518			29.543	1.34068
					48.066	1.23969			17.413	0.449106				13.458	0.822394			11.054	0.67549				26.554	1.08838			76.386	3.13085						10.064	0.383277			94.779	3.60956				78.741	3.57332			18.073	0.820164
					16.158	0.416737			11.825	0.304983				14.926	0.912101			10.481	0.640475				26.534	1.08756			74.346	3.04724						34.015	1.29543			45.459	1.73126				41.582	1.88702			35.64	1.61737
					40.326	1.04006			14.998	0.386819				12.515	0.764769			10.141	0.619698				28.919	1.18531			93.515	3.83292						9.478	0.36096			77.854	2.96499				15.412	0.699406			48.853	2.21698
					44.846	1.15664			12.866	0.331832				12.689	0.775402			8.369	0.511415				29.132	1.19404			100.885	4.135						18.826	0.716968			85.834	3.2689				23.501	1.06649			41.816	1.89764
					12.822	0.330697			15.61	0.402604				12.686	0.775219			11.367	0.694617				26.87	1.10133			70.515	2.89022						18.119	0.690043			84.664	3.22434				22.274	1.01081			43.545	1.9761
					39.419	1.01667			10.583	0.27295				20.407	1.24704			7.986	0.48801				15.989	0.655345			76.27	3.1261						9.951	0.378973			95.217	3.62624				43.408	1.96988			58.803	2.66852
					46.136	1.18991			11.747	0.302972				17.872	1.09213			10.156	0.620615				26.306	1.07821			63.88	2.61827						26.525	1.01018			75.655	2.88124				22.27	1.01063			24.795	1.12521
					17.824	0.459706			12.349	0.318498				20.109	1.22883			13.694	0.836816				34.469	1.41279			51.999	2.1313						26.903	1.02457			67.122	2.55627				18.714	0.849253			79.267	3.59719
					51.633	1.33169			3.222	0.0830999				20.318	1.2416			11.5	0.702745				32.72	1.3411			69.728	2.85796						19.733	0.75151			91.727	3.49333				39.234	1.78046			52.32	2.37432
					45.03	1.16139			11.9	0.306918				29.86	1.82469			11.374	0.695045				34.419	1.41074			68.946	2.82591						29.043	1.10607			36.536	1.39143				24.788	1.1249			29.254	1.32757
					43.843	1.13077			9.41	0.242697				31.311	1.91336			12.69	0.775463				34.084	1.39701			69.569	2.85144						25.163	0.958306			70.363	2.6797				66.575	3.02122			15.878	0.720554
					39.479	1.01822			16.376	0.42236				14.254	0.871037			8.086	0.494121				35.612	1.45964			91.647	3.75636						19.666	0.748959			43.791	1.66773				6.014	0.272919			28.678	1.30143
					14.086	0.363298			13.543	0.349293				17.738	1.08394			8.923	0.545269				38.609	1.58248			75.326	3.08741						30.816	1.17359			50.765	1.93333				19.885	0.902394			39.938	1.81241
					37.544	0.968312			19.789	0.510386				11.722	0.716311			7.562	0.4621				15.523	0.636245			72.354	2.96559						20.746	0.790089			80.04	3.04824				15.697	0.71234			20.178	0.915691
					53.206	1.37226			11.16	0.287832				6.128	0.374471			11.106	0.678668				38.677	1.58526			74.182	3.04052						24.604	0.937017			99.552	3.79133				35.8	1.62463			55.657	2.52575
					15.127	0.390147			7.881	0.203262				8.57	0.523697			10.947	0.668952				34.684	1.4216			83.049	3.40395						20.439	0.778398			85.758	3.266				11.931	0.541436			37.277	1.69165
					10.122	0.261061			9.836	0.253684				7.617	0.465461			12.033	0.735315				27.563	1.12973			84.337	3.45674						35.179	1.33975			86.705	3.30207				9.593	0.435337			33.393	1.5154
					47.369	1.22171			9.745	0.251337				18.836	1.15103			8.908	0.544352				34.382	1.40922			71.312	2.92288						21.263	0.809779			157.995	6.01707				19.263	0.874167			71.772	3.25706
					10.585	0.273002			6.993	0.180359				19.511	1.19228			10.185	0.622387				24.019	0.984473			56.919	2.33295						24.903	0.948404			55.735	2.12261				11.8	0.535492			28.446	1.2909
					42.015	1.08363			8.967	0.231271				7.951	0.485871			9.407	0.574845				21.184	0.868274			77.594	3.18037						20.428	0.777979			63.264	2.40934				7.488	0.33981			15.791	0.716606
					43.979	1.13428			12.482	0.321928				19.163	1.17102			9.782	0.597761				23.033	0.944059			88.119	3.61176						30.876	1.17588			58.464	2.22654				24.747	1.12303			35.211	1.5979
					42.836	1.1048			9.404	0.242542				13.927	0.851054			8.093	0.494549				22.96	0.941067			73.427	3.00957						21.003	0.799877			49.412	1.8818				51.108	2.31931			24.244	1.10021
					55.203	1.42376			12.035	0.3104				16.337	0.998325			10.02	0.612304				23.547	0.965127			85.614	3.50908						14.418	0.549094			97.979	3.73143				24.769	1.12403			20.822	0.944916
					40.826	1.05296			10.726	0.276639				20.526	1.25431			9.299	0.568245				25.82	1.05829			72.195	2.95907						32.292	1.22981			91.636	3.48986				16.488	0.748236			41.914	1.90208
					42.774	1.1032			8.736	0.225314				17.689	1.08094			8.679	0.530358				10.698	0.438482			67.159	2.75266						18.699	0.712132			92.149	3.5094				15.759	0.715154			26.529	1.2039
					45.425	1.17157			14.806	0.381867				13.914	0.85026			8.108	0.495465				22.226	0.910983			75.228	3.08339						28.313	1.07827			122.941	4.68208				19.239	0.873078			59.74	2.71104
					51.185	1.32013			7.672	0.197872				15.81	0.966121			8.089	0.494304				23.505	0.963405			72.5	2.97158						25.812	0.983023			82.067	3.12543				37.53	1.70314			58.949	2.67514
					12.296	0.317131			10.793	0.278367				15.885	0.970704			9.527	0.582178				23.559	0.965619			77.391	3.17204						18.824	0.716892			76.864	2.92728				10.433	0.473456			32.518	1.47569
					20.409	0.526377			9.111	0.234985				18.663	1.14046			8.395	0.513003				19.003	0.778881			80.104	3.28324						14.593	0.555759			88.223	3.35988				19.203	0.871444			42.217	1.91583
					19.834	0.511547			11.095	0.286156				20.244	1.23707			7.87	0.480922				14.944	0.612514			70.021	2.86997						36.208	1.37894			55.384	2.10924				9.975	0.452672			43.5	1.97406
					47.018	1.21266			5.711	0.147295				17.002	1.03896			8.339	0.509581				19.752	0.80958			73.201	3.00031						22.253	0.847482			112.546	4.2862				24.099	1.09363			32.674	1.48277
					41.385	1.06738			8.919	0.230033				18.19	1.11156			11.154	0.681601				18.049	0.739779			85.302	3.49629						34.095	1.29847			81.459	3.10228				13.443	0.610052			44.013	1.99734
					42.378	1.09299			11.472	0.295879				16.559	1.01189			8.967	0.547957				20.19	0.827533			86.137	3.53052						14.477	0.551341			116.05	4.41964				35.704	1.62027			58.872	2.67165
					43.701	1.12711			8.851	0.22828				13.927	0.851054			11.851	0.724193				14.863	0.609194			82.13	3.36628						18.961	0.72211			66.199	2.52112				27.707	1.25736			9.004	0.408607
					25.96	0.669545			13.301	0.343051				18.069	1.10416			8.732	0.533597				20.6	0.844337			80.861	3.31427						17.536	0.66784			24.098	0.917747				17.033	0.772969			36.388	1.65131
					45.664	1.17774			11.944	0.308052				15.463	0.944916			12.356	0.755053				19.89	0.815236			88.136	3.61245						28.747	1.0948			80.657	3.07174				29.335	1.33124			74.935	3.4006
					65.64	1.69295			11.407	0.294203				15.248	0.931778			12.857	0.785668				18.614	0.762937			84.153	3.4492						27.971	1.06525			79.581	3.03076				11.267	0.511304			19.879	0.902122
					50.363	1.29893			19.371	0.499605				19.439	1.18788			10.446	0.638336				19.863	0.81413			79.782	3.27005						22.503	0.857003			96.619	3.67963				10.1	0.458344			55.34	2.51136
					30.188	0.778591			22.023	0.568004				15.847	0.968382			8.986	0.549118				18.696	0.766298			81.591	3.34419						22.393	0.852814			58.576	2.2308				21.255	0.964566			50.856	2.30788
					12.396	0.31971			12.323	0.317827				15.385	0.94015			7.359	0.449695				17.344	0.710883			88.681	3.63479						20.892	0.79565			84.21	3.20705				27.762	1.25986			24.607	1.11668
					56.327	1.45275			9.874	0.254664				21.513	1.31462			12.744	0.778763				17.728	0.726622			84.466	3.46203						31.59	1.20307			84.271	3.20937				19.635	0.891049			38.582	1.75088
									8.025	0.206976				14.864	0.908313			10.368	0.63357				21.099	0.86479			87.955	3.60503						37.386	1.42381			96.399	3.67125				18.176	0.824839			64.363	2.92083
									6.821	0.175923				10.242	0.62587			9.414	0.575273				17.814	0.730147			23.792	0.975169						21.94	0.835562			204.921	7.8042				36.835	1.6716			39.791	1.80574
									9.425	0.243084				20.135	1.23041			10.48	0.640414				19.804	0.811712			56.779	2.32722						10.667	0.406241			89.249	3.39895				11.356	0.515343			53.558	2.4305
									3.61	0.093107				19.497	1.19143			9.719	0.593911				16.406	0.672437			83.949	3.44084						23.346	0.889108			96.479	3.6743				18.555	0.842038			35.527	1.61224
									10.675	0.275323				21.57	1.3181			17.364	1.06108				18.354	0.75228			76.314	3.1279						13.322	0.507354			93.83	3.57342				23.937	1.08628			40.294	1.82857
									10.35	0.266941				21.371	1.30594			8.793	0.537325				20.527	0.841345			80.87	3.31464						19.7	0.750254			85.722	3.26463				30.968	1.40535			57.333	2.60181
									13.867	0.357649				22.035	1.34652			12.197	0.745337				21.392	0.876799			78.959	3.23631						29.531	1.12466			88.232	3.36022				19.359	0.878524			57.088	2.59069
									11.847	0.305551				24.239	1.4812			9.333	0.570323				20.129	0.825032			66.3	2.71745						18.264	0.695565			93.569	3.56348				19.656	0.892002			44.907	2.03791
									23.364	0.60259				26.63	1.62731			11.735	0.717105				20.916	0.857289			59.292	2.43022						22.855	0.870408			77.311	2.94431				22.168	1.006			19.81	0.898991
									9.35	0.24115				33.772	2.06375			11.354	0.693823				22.326	0.915081			54.714	2.24258						20.668	0.787119			95.205	3.62578				25.851	1.17314			148.993	6.7614
									8.351	0.215384				22.716	1.38813			9.589	0.585967				22.707	0.930698			62.448	2.55957						29.552	1.12546			67.401	2.5669				14.189	0.643906			54.015	2.45124
									7.322	0.188845				15.608	0.953777			11.444	0.699322				16.424	0.673175			64.37	2.63835						14.218	0.541477			72.076	2.74494				14.306	0.649215			56.62	2.56945
									10.659	0.274911				16.485	1.00737			8.793	0.537325				14.532	0.595627			71.686	2.93821						24.15	0.919727			121.12	4.61273				12.402	0.562811			52.547	2.38462
									17.828	0.459809				19.97	1.22033			12.149	0.742404				18.414	0.754739			65.35	2.67852						30.778	1.17215			72.024	2.74296				23.433	1.0634			26.273	1.19229
									9.822	0.253323				18.951	1.15806			10.541	0.644142				19.45	0.797202			65.983	2.70446						20.804	0.792298			71.43	2.72034				20.091	0.911743			33.178	1.50564
									9.06	0.23367				19.171	1.17151			8.627	0.527181				19.062	0.781299			62	2.54121						16.48	0.627623			71.621	2.72761				17.66	0.801422			60.408	2.74135
									14.91	0.38455				16.34	0.998508			9.088	0.555351				23.21	0.951314			72.661	2.97817						12.531	0.47723			94.135	3.58503				18.978	0.861234			54.03	2.45192
									11.018	0.28417				10.783	0.65893			9.05	0.553029				16.691	0.684118			61.868	2.5358						28.078	1.06932			77.895	2.96655				45.939	2.08474			41.317	1.87499
									7.568	0.195189				16.921	1.03401			9.748	0.595683				19.403	0.795276			69.769	2.85964						32.094	1.22227			59.294	2.25815				21.591	0.979813			34.557	1.56822
									11.645	0.300341				16.508	1.00877			14.891	0.909962				19.384	0.794497			76.364	3.12995						18.991	0.723252			107.021	4.07578				20.648	0.93702			32.503	1.47501
									9.46	0.243987				16.37	1.00034			7.813	0.477439				18.194	0.745722			57.567	2.35951						25.796	0.982413			129.379	4.92726				31.861	1.44587			32.161	1.45949
									8.708	0.224592				22.94	1.40182			10.03	0.612915				18.717	0.767158			60.882	2.49539						13.969	0.531995			91.061	3.46796				9.893	0.448951			43.503	1.97419
									11.207	0.289044				21.756	1.32947			12.766	0.780108				17.871	0.732483			71.976	2.9501						14.517	0.552865			68.592	2.61225				21.42	0.972053			14.632	0.66401
									11.426	0.294693				18.77	1.147			8.526	0.521009				17.228	0.706128			52.978	2.17142						16.649	0.63406			65.409	2.49103				14.368	0.652029			3.949	0.179208
									14.984	0.386458				17.648	1.07844			9.144	0.558774				18.415	0.75478			54.908	2.25053						10.814	0.41184			81.733	3.11271				14.036	0.636963			44.051	1.99906
									7.547	0.194648				17.654	1.0788			10.337	0.631676				17.819	0.730352			45.412	1.86131						17.541	0.66803			71.614	2.72734				12.79	0.580418			34.666	1.57317
									11.169	0.288064				18.98	1.15983			13.193	0.806201				16.706	0.684733			45.65	1.87107						19.373	0.7378			71.818	2.73511				13.68	0.620807			24.41	1.10774
									6.817	0.17582				18.222	1.11351			8.429	0.515081								56.287	2.30705						19.767	0.752805			43.831	1.66926				10.04	0.455622			38.051	1.72678
									12.102	0.312128				21.252	1.29867			11.965	0.73116								74.173	3.04015						11.681	0.444859			68.081	2.59279				17.705	0.803464			55.375	2.51295
									6.991	0.180308				19.955	1.21941			11.075	0.676774								69.697	2.85669						17.005	0.647617			86.397	3.29034				10.673	0.484348			6.954	0.315577
									11.09	0.286027				14.637	0.894441			12.307	0.752059								56.071	2.2982						13.779	0.524759			69.182	2.63472				13.394	0.607828			67.253	3.05198
									14.815	0.3821				19.375	1.18397			7.483	0.457273								59.833	2.45239						11.531	0.439146			111.514	4.24689				16.835	0.763983			41.636	1.88947
									12.884	0.332296				8.625	0.527058			10.197	0.623121								59.962	2.45768						25.307	0.96379			216.426	8.24235				30.433	1.38107			35.319	1.6028
									8.149	0.210174				20.583	1.25779			10.524	0.643103								74.45	3.0515						23.075	0.878787			105.144	4.0043				17.899	0.812268			58.871	2.6716
									6.688	0.172493				21.891	1.33772			10.971	0.670418								70.411	2.88595						26.825	1.0216			95.306	3.62963				16.163	0.733487			14.654	0.665008
									11.321	0.291984				22.017	1.34542			9.099	0.556024								71.381	2.92571						21.519	0.819528			98.195	3.73965				24.289	1.10225			32.558	1.4775
									12.388	0.319504				22.728	1.38887			13.638	0.833394								64.03	2.62441						24.054	0.916071			56.577	2.15468				10.609	0.481443			47.083	2.13666
									15.591	0.402114				25.812	1.57733			8.65	0.528586								83.75	3.43268						17.452	0.664641			82.951	3.1591				38.405	1.74284			18.616	0.844806
									7.877	0.203159				27.535	1.68261			10.271	0.627643								68.137	2.79275						22.666	0.863211			77.225	2.94103				21.224	0.963159			29.262	1.32793
									12.749	0.328815				33.824	2.06692			11.347	0.693395								63.41	2.599						46.382	1.76641			63.472	2.41726				25.21	1.14405			53.889	2.44552
									16.528	0.42628				22.801	1.39333			9.969	0.609188								68.773	2.81882						20.471	0.779616			63.17	2.40576				17.159	0.778686			65.612	2.97751
									10.712	0.276277				14.796	0.904157			8.752	0.534819								53.705	2.20122						30.805	1.17318			139.424	5.30982				48.932	2.22057			14.4	0.653481
									11.571	0.298432				19.643	1.20035			5.976	0.365183								47.922	1.96419						37.051	1.41105			76.99	2.93208				26.386	1.19741			29.702	1.3479
									12.127	0.312772				17.306	1.05754			8.831	0.539647								52.234	2.14093						10.115	0.385219			128.853	4.90723				21.643	0.982173			27.531	1.24937
									3.414	0.0880518				21.062	1.28706			12.421	0.759025								50.954	2.08846						22.065	0.840322			69.922	2.66291				19.907	0.903392			42.269	1.91819
									11.903	0.306995				18.214	1.11303			11.097	0.678118								57.446	2.35455						10.713	0.407993			47.266	1.80008				27.6	1.25251			39.032	1.7713
									8.977	0.231529				20.056	1.22559			7.642	0.466989								46.23	1.89484						25.404	0.967484			47.605	1.81299				17.017	0.772242			20.565	0.933253
									12.637	0.325926				19.024	1.16252			8.981	0.548813								48.056	1.96968						21.472	0.817738			32.354	1.23217				15.98	0.725183			22.806	1.03495
									18.413	0.474897				24.526	1.49874			4.537	0.277248								52.059	2.13376						20.668	0.787119			37.036	1.41048				18.927	0.858919			17.422	0.790622
									10.57	0.272615				10.19	0.622693			9.222	0.56354								47.453	1.94497						12.259	0.466871			39.457	1.50268				18.288	0.829921			25.804	1.171
									3.04	0.0784059				17.336	1.05937			9.194	0.561829								48.747	1.99801						47.084	1.79314			37.538	1.42959				23.089	1.04779			30.187	1.36991
									7.808	0.201379				14.294	0.873481			10.009	0.611632								50.457	2.06809						19.271	0.733916			41.503	1.5806				24.46	1.11001			43.623	1.97964
									9.284	0.239447				15.826	0.967099			9.28	0.567084								58.281	2.38878						15.454	0.588549			40.718	1.5507				19.683	0.893227			34.397	1.56096
									8.78	0.226448				12.667	0.774058			10.594	0.64738								47.37	1.94157						17.989	0.685092			60.041	2.2866				25.255	1.14609			5.913	0.268336
									6.676	0.172183				15.756	0.962821			13.589	0.8304								48.052	1.96952						18.371	0.69964			38.101	1.45104				22.605	1.02583			11.192	0.5079
									8.66	0.223354				13.779	0.84201			8.655	0.528892								43.386	1.77827						23.263	0.885947			48.484	1.84646				24.257	1.1008			12.374	0.56154
									18.71	0.482557				18.385	1.12347			20.144	1.23096								41.468	1.69966						24.252	0.923612			69.787	2.65776				24.236	1.09985			24.075	1.09254
									12.131	0.312875				15.201	0.928906			15.54	0.949622								38.698	1.58612						22.88	0.871361			52.934	2.01594				31.264	1.41878			42.233	1.91656
									9.77	0.251982				17.133	1.04697			10.872	0.664369								42.159	1.72798						20.264	0.771733			65.077	2.47839				29.303	1.32979			24.821	1.12639
									13.509	0.348416				18.409	1.12494			12.765	0.780046								41.158	1.68695						21.237	0.808789			43.837	1.66949				28.898	1.31141			27.825	1.26272
									8.721	0.224927				17.923	1.09524			13.556	0.828383								44.288	1.81524						22.341	0.850833			64.932	2.47287				24.489	1.11133			24.095	1.09345
									11.65	0.30047				16.483	1.00725			10.408	0.636014								45.113	1.84906						27.811	1.05915			91.238	3.4747				14.078	0.638869			56.597	2.56841
									10.338	0.266631				19.54	1.19405			14.04	0.857959								44.253	1.81381						8.251	0.314231			68.634	2.61385				48.357	2.19447			51.226	2.32467
									9.371	0.241691				16.957	1.03621			12.191	0.74497															12.431	0.473421			61.602	2.34605				49.985	2.26835			39.592	1.79671
									8.381	0.216158				17.321	1.05846			11.347	0.693395															17.704	0.674238			37.434	1.42563				20.332	0.922679			32.182	1.46044
									9.556	0.246463				20.474	1.25113			12.341	0.754137															29.507	1.12374			32.933	1.25422				13.989	0.63483			49.793	2.25964
									14.211	0.366522				15.244	0.931534			8.2	0.501087															15.25	0.58078			46.958	1.78835				19.336	0.87748			62.23	2.82404
									7.72	0.19911				17.773	1.08608			13.019	0.795568															36.809	1.40183			92.481	3.52204				16.845	0.764437			21.487	0.975094
									8.038	0.207311				20.041	1.22467			9.718	0.59385															9.622	0.366444			83.86	3.19372				35.726	1.62127			36.317	1.64809
									18.005	0.464374				15.577	0.951883			6	0.366649															22.918	0.872808			49.109	1.87026				39.29	1.78301			39.721	1.80256
									10.666	0.275091				17.709	1.08217			8.233	0.503104															13.759	0.523997			79.16	3.01472				14.786	0.670998			32.252	1.46362
									5.65	0.145721				18.998	1.16093			8.713	0.532436															23.507	0.895239			64.192	2.44468				24.125	1.09481			43.893	1.99189
									9.959	0.256857				19.949	1.21905			9.427	0.576067															16.512	0.628842			55.262	2.10459				27.739	1.25881			52.42	2.37885
									8.509	0.219459				16.557	1.01177			7.66	0.468089															23.816	0.907007			71.871	2.73713				14.723	0.668139			17.025	0.772605
									12.409	0.320045				13.692	0.836694			7.45	0.455256															19.681	0.74953			44.955	1.71206				22.011	0.998873			43.644	1.98059
									10.817	0.278986				17.772	1.08602			7.968	0.48691															36.54	1.39159			62.946	2.39723				33.396	1.51553			40.904	1.85625
									18.775	0.484234				15.894	0.971254			10.947	0.668952															29.858	1.13711			78.706	2.99743				24.549	1.11405			28.71	1.30288
									19.46	0.501901				16.759	1.02411			9.575	0.585111															14.917	0.568098			56.458	2.15014				32.373	1.46911			18.161	0.824158
									11.245	0.290024				17.623	1.07691			11.203	0.684595															15.334	0.583979			42.211	1.60756				36.626	1.66211			48.155	2.1853
									9.51	0.245276				16.438	1.0045			8.847	0.540624															13.957	0.531538			61.683	2.34913				19.222	0.872307			38.129	1.73032
									7.322	0.188845				21.384	1.30674			11.655	0.712216															19.044	0.725271			35.655	1.35788				8.513	0.386325			74.247	3.36938
									6.236	0.160835				21.19	1.29488			12.488	0.763119															23.438	0.892611			63.936	2.43493				26.971	1.22396			29.518	1.33955
									8.25	0.212779				18.201	1.11223			7.703	0.470717															20.668	0.787119			67.085	2.55486				41.418	1.87958			41.722	1.89337
									3.331	0.0859112				21.195	1.29519			8.604	0.525775															17.859	0.680141			71.849	2.73629				34.762	1.57752			22.079	1.00196
									1.103	0.0284479				18.88	1.15372			10	0.611082															17.724	0.675			36.674	1.39669				18.639	0.84585			48.852	2.21694
									10.212	0.263382				24.933	1.52361			8.69	0.53103															21.672	0.825355			85.064	3.23957				16.567	0.751821			39.625	1.79821
									10.392	0.268024				16.891	1.03218			8.14	0.497421															18.858	0.718187			33.67	1.28229				15.462	0.701676			21.735	0.986348
									13.163	0.339492				14.562	0.889858			12.686	0.775219															18.671	0.711065			41.634	1.58559				23.529	1.06776			11.102	0.503816
									9.432	0.243264				16.414	1.00303			8.6	0.525531															16.654	0.63425			74.119	2.82274				14.966	0.679167			20.792	0.943554
									17.966	0.463368				12.919	0.789457			10.153	0.620432															17.987	0.685016			34.598	1.31763				39.652	1.79943			28.782	1.30615
									12.921	0.333251				16	0.977731			8.139	0.49736															24.664	0.939302			48.256	1.83778				21.978	0.997376			23.742	1.07743
									13.012	0.335598				14.585	0.891263			6.931	0.423541															13.17	0.501565			70.852	2.69832				22.105	1.00314			63.206	2.86833
									13.592	0.350557				18.472	1.12879			11.915	0.728104															16.178	0.616122			74.154	2.82408				20.798	0.943827			27.442	1.24534
									10.103	0.260571				15.775	0.963982			9.084	0.555107															19.109	0.727746			61.337	2.33595				13.459	0.610778			28.32	1.28518
									11.599	0.299154				16.277	0.994658			12.41	0.758353															24.563	0.935456			59.105	2.25095				27.945	1.26816			34.626	1.57135
									8.682	0.223921				17.57	1.07367			8.323	0.508604															28.053	1.06837			64.131	2.44236				21.114	0.958167			27.331	1.2403
									3.979	0.102624				17.584	1.07453			11.423	0.698039															16.133	0.614408			66.076	2.51643				90.467	4.10545			13.573	0.615951
									19.709	0.508323				13.409	0.8194			10.437	0.637786															20.232	0.770514			57.658	2.19584				15.248	0.691964			27.546	1.25006
									9.023	0.232716				16.238	0.992275			9.703	0.592933															21.074	0.802581			86.093	3.27876				23.513	1.06704			8.144	0.36958
									14.572	0.375832				18.429	1.12616			14.264	0.871648															18.973	0.722567			63.109	2.40344				25.891	1.17495			131.046	5.94695
									11.286	0.291082				17.735	1.08375			11.801	0.721138															16.867	0.642362			58.364	2.22273				30.349	1.37726			37.057	1.68167
									10.461	0.269804				17.508	1.06988			14.312	0.874581															23.69	0.902209			63.024	2.4002				23.251	1.05515			69.733	3.16453
									8.837	0.227919				12.237	0.747781			11.335	0.692662															32.247	1.22809			54.81	2.08738				23.626	1.07216			42.07	1.90916
									11.252	0.290205				15.8	0.96551			12.88	0.787074															13.319	0.50724			54.249	2.06602				24.752	1.12326			37.629	1.70763
									10.646	0.274575				18.276	1.11681			15.235	0.930984															19.231	0.732392			76.021	2.89518				24.137	1.09535			61.638	2.79717
									5.416	0.139686				16.621	1.01568			9.671	0.590978															14.648	0.557854			62.208	2.36913				26.955	1.22324			61.343	2.78378
									21.687	0.559338				15.606	0.953655			10.227	0.624954															17.433	0.663917			49.792	1.89628				18.04	0.818667			29.736	1.34944
									10.354	0.267044				19.123	1.16857			12.63	0.771797															18.211	0.693547			53.018	2.01913				13.193	0.598707			49.495	2.24611
									12.823	0.330723				16.041	0.980237																			18.239	0.694613			53.198	2.02599				17.991	0.816443			43.952	1.99457
									2.187	0.0564058				17.694	1.08125																			19.202	0.731288			31.504	1.1998				13.833	0.62775			28.033	1.27216
									14.763	0.380758				16.831	1.02851																			11.767	0.448134			52.517	2.00005				23.004	1.04394			34.246	1.55411
									4.225	0.108969				20.239	1.23677																			20.382	0.776227			37.21	1.4171				29.668	1.34635			18.311	0.830965
									11	0.283705				11.93	0.729021																			21.502	0.818881			62.437	2.37785				28.112	1.27574			18.997	0.862096
									19.539	0.503938				15.079	0.921451																			10.308	0.392569			47.765	1.81908				21.045	0.955036			28.22	1.28064
									7.22	0.186214				11.653	0.712094																			22.214	0.845997			49.307	1.8778				9.813	0.44532			33.404	1.5159
									10.632	0.274214				7.683	0.469494																			14.283	0.543953			62.928	2.39655				25.28	1.14722			37.574	1.70513
									18.797	0.484801				16.907	1.03316																			19.216	0.731821			57.833	2.20251				22.652	1.02796			36.388	1.65131
									11	0.283705				9.575	0.585111																			17.383	0.662013			45.086	1.71705				54.771	2.48554			45.227	2.05243
									16.477	0.424965				16.085	0.982926																			23.934	0.911501			56.634	2.15685				17.106	0.776281			20.188	0.916144
									9.786	0.252395				10.464	0.639436																			11.685	0.445011			54.388	2.07131				36.005	1.63393			69.514	3.15459
									3.798	0.0979557				9.347	0.571179																			36.74	1.3992			49.471	1.88405				22.313	1.01258			71.486	3.24408
									13.712	0.353652				9.12	0.557307																			22.542	0.858488			82.885	3.15659				16.65	0.755588			40.597	1.84232
									6.574	0.169553				15.074	0.921145																			13.644	0.519617			43.297	1.64892				22.986	1.04312			54.906	2.49167
									9.347	0.241072				7.376	0.450734																			18.394	0.700516			51.417	1.95816				23.924	1.08569			41.698	1.89228
									12.243	0.315764				8.107	0.495404																			20.212	0.769753			66.739	2.54168				19.212	0.871853			22.898	1.03913
									10.195	0.262943				13.744	0.839871																			15.069	0.573887			46.123	1.75655				42.143	1.91248			57.095	2.59101
									11.493	0.296421				15.395	0.940761																			23.514	0.895506			62.472	2.37918				21.007	0.953311			30.635	1.39024
									10.607	0.273569				13.085	0.799601																			34.869	1.32795			43.104	1.64157				24.344	1.10475			145.723	6.613
									12.832	0.330955				13.128	0.802229																			37.234	1.41802			50.593	1.92678				20.077	0.911107			52.495	2.38226
									10.122	0.261061				14.084	0.860648																			24.185	0.92106			50.557	1.92541				18.896	0.857513			43.923	1.99325
									10.453	0.269598				10.399	0.635464																			19.152	0.729384			64.43	2.45375				17.278	0.784087			43.186	1.95981
									10.382	0.267766				11.672	0.713255																			20.032	0.762897			27.965	1.06502				16.317	0.740476			75.155	3.41058
									9.142	0.235785				10.528	0.643347																			21.238	0.808827			41.499	1.58045				7.826	0.355149			37.747	1.71298
									14.817	0.382151				9.792	0.598372																			20.609	0.784872			56.988	2.17033				14.608	0.66292			39.219	1.77978
									10.353	0.267018				16.769	1.02472																			34.003	1.29497			50.817	1.93531				66.757	3.02948			14.963	0.679031
									13.837	0.356876																								24.612	0.937322			52.181	1.98726				29.204	1.3253			26.872	1.21947
									9.822	0.253323																								16.18	0.616198			45.729	1.74154				53.392	2.42296			14.763	0.669954
									8.346	0.215255																								14.025	0.534127			119.356	4.54555				7.538	0.342079			39.656	1.79961
									5.575	0.143787																								16.654	0.63425			36.67	1.39654				31.209	1.41628			21.827	0.990523
									23.271	0.600192																								24.934	0.949585			56.107	2.13678				26.505	1.20281			29.665	1.34622
									12.139	0.313082																								21.762	0.828783			49.088	1.86946				53.452	2.42569			35.142	1.59477
									5.479	0.141311																								19.263	0.733611			34.713	1.32201				13.796	0.626071			31.194	1.4156
									2.76	0.0711843																								8.454	0.321962			60.366	2.29898				21.295	0.966381			35.254	1.59985
									12.019	0.309987																								22.161	0.843978			40.291	1.53444				25.171	1.14228			34.049	1.54517
									3.785	0.0976204																								20.927	0.796983			51.825	1.9737				7.523	0.341399			42.46	1.92686
									11.734	0.302636																								13.262	0.505069			37.708	1.43607				50.133	2.27507			24.625	1.1175
									13.981	0.36059																								35.536	1.35335			53.496	2.03734				8.606	0.390546			37.881	1.71906
									5.363	0.138319																								26.458	1.00762			40.503	1.54251				19.916	0.903801			44.936	2.03922
									16.492	0.425352																								26.207	0.998066			10.771	0.410202				9.331	0.423447			28.455	1.29131
									1.829	0.0471725																								10.055	0.382934			17.951	0.683645				12.194	0.553372			38.986	1.76921
									11.248	0.290102																								20.172	0.768229			36.292	1.38214				21.225	0.963204			50.259	2.28079
									17.847	0.460299																								24.605	0.937055			87.641	3.33771				62.493	2.83597			21.246	0.964157
									1.938	0.0499837																								20.574	0.783539			102.573	3.90638				23.963	1.08746			23.186	1.0522
									17.597	0.453851																								20.576	0.783615			55.837	2.12649				26.996	1.2251			31.717	1.43934
									13.38	0.345089																								21.612	0.82307			112.133	4.27047				12.318	0.558999			41.31	1.87467
									7.265	0.187375																								11.267	0.429092			85.743	3.26543				32.929	1.49434			54.478	2.47225
									10.083	0.260055																								23.014	0.876464			55.339	2.10753				5.941	0.269606			41.446	1.88085
									11.279	0.290901																								11.762	0.447943			141.829	5.40141				12.441	0.564581			37.661	1.70908
									18.538	0.478121																								16.106	0.61338			49.957	1.90256				10.55	0.478766			38.118	1.72982
									16.485	0.425171																								27.553	1.04933			85.96	3.2737				27.075	1.22868			22.001	0.99842
									17.416	0.449183																								21.475	0.817853			86.769	3.30451				53.74	2.43876			31.973	1.45096
									16.556	0.427002																								13.661	0.520265			68.537	2.61016				15.175	0.688651			41.488	1.88275
									20.138	0.519387																								22.217	0.846111			103.343	3.93571				15.74	0.714291			34.51	1.56609
									14.467	0.373124																								33.58	1.27886			99.049	3.77218				25.725	1.16742			35.5	1.61101
									9.803	0.252833																								19.64	0.747969			81.644	3.10933				38.791	1.76036			27.355	1.24139
									17.18	0.443096																								14.854	0.565699			68.658	2.61477				11.119	0.504587			31.448	1.42713
									11.994	0.309342																								20.337	0.774513			129.745	4.9412				43.215	1.96112			27.976	1.26957
									2.398	0.0618478																								21.353	0.813206			97.196	3.70161				26.497	1.20245			40.456	1.83592
									16.294	0.420245																								23.809	0.906741			82.082	3.12601				32.998	1.49747			45.984	2.08678
									16.205	0.41795																								15.486	0.589768			115.471	4.39759				15.339	0.696094			44.58	2.02307
									16.021	0.413204																								13.502	0.514209			21.244	0.809055				22.224	1.00854			38.643	1.75364
									7.99	0.206073																								19.618	0.747131			16.964	0.646056				71.125	3.2277			47.764	2.16756
									16.125	0.415886																								16.151	0.615094			19.675	0.749302				17.53	0.795523			55.145	2.50252
									12.913	0.333044																								11.07	0.421589			36.285	1.38188				18.269	0.829059			51.126	2.32013
									8.519	0.219717																								16.956	0.645751			20.08	0.764726				11.412	0.517884			54.431	2.47011
									16.227	0.418517																								36.466	1.38877			98.534	3.75256				20.855	0.946413			45.908	2.08333
									16.347	0.421612																								10.502	0.399958			69.305	2.63941				8.99	0.407972			59.245	2.68858
									21.681	0.559183																								13.258	0.504917			135.195	5.14876				18.816	0.853882			33.873	1.53718
									15.318	0.395073																								18.213	0.693623			84.761	3.22803				12.16	0.551829			24.291	1.10234
									12.851	0.331445																								22.921	0.872922			68.644	2.61423				9.213	0.418092			76.296	3.46236
									8.61	0.222064																								14.792	0.563338			52.68	2.00626				25.291	1.14772			9.21	0.417956
									13.17	0.339673																								18.851	0.71792			69.102	2.63168				17.37	0.788262			21.264	0.964974
									9.735	0.251079																								33.421	1.2728			96.384	3.67068				25.018	1.13533			38.614	1.75233
									11.491	0.296369																								36.182	1.37795			85.579	3.25919				34.243	1.55397			44.978	2.04113
									14.516	0.374388																								17.997	0.685397			65.266	2.48559				20.469	0.928896			22.632	1.02705
									11.92	0.307433																								19.378	0.737991			104.224	3.96926				19.221	0.872261			153.57	6.96911
									11.169	0.288064																								19.422	0.739666			100.723	3.83593				18.847	0.855289			8.63	0.391635
									13.209	0.340679																								21.103	0.803685			95.406	3.63344				17.251	0.782861			31.307	1.42073
									14.874	0.383621																								26.115	0.994562			72.361	2.75579				37.103	1.68376			35.892	1.6288
									10.521	0.271351																								19.125	0.728355			68.797	2.62006				26.019	1.18076			24.379	1.10633
									9.493	0.244838																								19.17	0.730069			62.4	2.37644				10.823	0.491155			48.904	2.21929
									27.833	0.717852																								14.242	0.542391			77.832	2.96415				22.869	1.03781			44.801	2.0331
									16.818	0.43376																								16.151	0.615094			15.341	0.584246				29.535	1.34032			55.078	2.49948
									3.934	0.101463																								20.635	0.785862			19.428	0.739895				18.807	0.853474			49.861	2.26272
									15.725	0.40557																								17.464	0.665098			36.084	1.37422				18.979	0.861279			41.435	1.88035
									14.959	0.385814																								27.793	1.05847			25.361	0.965847				19.287	0.875256			30.15	1.36823
									12.821	0.330672																								19.546	0.744389			29.741	1.13265				8.758	0.397444			32.271	1.46448
									14.737	0.380088																								12.202	0.4647			42.527	1.6196				15.761	0.715244			19.176	0.870219
									8.671	0.223637																								23.945	0.91192			41.322	1.5737				18.778	0.852158			47.01	2.13334
									6.584	0.169811																								36.883	1.40465			54.293	2.06769				23.97	1.08777			28.562	1.29616
									17.233	0.444463																								20.821	0.792946			46.262	1.76184				12.513	0.567848			11.427	0.518565
									11.955	0.308336																								12.449	0.474107			51.441	1.95908				26.606	1.2074			36.834	1.67155
									1.944	0.0501385																								25.934	0.987669			58.365	2.22277				34.547	1.56777			29.118	1.32139
									16.749	0.43198																								26.944	1.02613			92.707	3.53065				7.678	0.348433			29.755	1.3503
									10.941	0.282184																								14.131	0.538164			31.721	1.20806				28.48	1.29244			28.344	1.28627
									1.682	0.0433811																								10.122	0.385486			91.197	3.47314				20.975	0.951859			36.853	1.67241
									16.722	0.431284																								20.206	0.769524			87.039	3.31479				26.91	1.22119			46.397	2.10553
									13.271	0.342278																								20.207	0.769562			81.058	3.08701				16.773	0.76117			85.552	3.8824
									10.993	0.283525																								20.515	0.781292			60.659	2.31013				20.245	0.918731			43.954	1.99466
									17.186	0.443251																								21.973	0.836818			38.14	1.45252				23.241	1.05469			40.565	1.84087
									12.519	0.322883																								21.148	0.805399			57.543	2.19146				51.723	2.34722			38.845	1.76281
									7.487	0.1931																								11.286	0.429815			67.826	2.58308				18.68	0.84771			51.862	2.35353
									10.2	0.263072																								23.55	0.896877			45.365	1.72768				9.024	0.409515			32.106	1.45699
									19.786	0.510309																								15.134	0.576362			16.154	0.615208				13.163	0.597345			63.092	2.86316
									10.802	0.278599																								29.633	1.12854			21.248	0.809208				25.262	1.14641			55.913	2.53737
									17.065	0.44013																								20.372	0.775846			16.073	0.612123				34.878	1.58279			32.793	1.48817
									18.38	0.474046																								19.597	0.746331			17.504	0.666621				23.481	1.06558			31.304	1.4206
									16.944	0.437009																								22.785	0.867743			16.525	0.629337				14.04	0.637144			33.112	1.50264
									19.625	0.506156																								32.575	1.24058			34.39	1.30971				28.981	1.31518			15.584	0.707212
									13.455	0.347023																								21.02	0.800524			25.658	0.977158				23.364	1.06027			51.344	2.33002
									9.934	0.256212																								15.668	0.596699			21.536	0.820176				32.831	1.48989			35.721	1.62104
									17.487	0.451014																								20.548	0.782549			22.659	0.862944				14.351	0.651258			2.967	0.134644
									12.275	0.316589																								25.442	0.968932			21.969	0.836666				24.845	1.12748			19.093	0.866453
									10.771	0.277799																								15.351	0.584627			74.529	2.83836				11.057	0.501774			43.327	1.96621
									13.67	0.352568																								24.091	0.91748			63.775	2.4288				35.899	1.62912			21.201	0.962115
									11.46	0.295569																								14.49	0.551836			53.642	2.0429				22.288	1.01144			24.815	1.12612
									3.732	0.0962535																								21.667	0.825165			65.398	2.49061				20.732	0.940832			52.307	2.37373
									16.687	0.430381																								20.993	0.799496			82.064	3.12532				21.65	0.982491			28.779	1.30601
									12.206	0.31481																								16.712	0.636459			79.563	3.03007				12.174	0.552464			31.383	1.42418
									20.536	0.529652																								10.712	0.407955			72.198	2.74958				13.763	0.624574			46.252	2.09895
									15.245	0.39319																								9.377	0.357113			56.59	2.15517				22.495	1.02084			37.055	1.68158
									13.116	0.33828																								22.312	0.849729			78.921	3.00562				49.29	2.23681			46.046	2.0896
									9.183	0.236842																								20.186	0.768762			52.274	1.9908				22.142	1.00482			19.058	0.864864
									13.123	0.338461																								19.312	0.735477			84.328	3.21154				19.324	0.876936			6.667	0.302553
									8.894	0.229389																								15.904	0.605687			65.403	2.4908				25.65	1.16401			51.407	2.33288
									12.48	0.321877																								17.189	0.654625			61.711	2.3502				24.756	1.12344			22.412	1.01707
									10.777	0.277954																								18.475	0.703601			69.111	2.63202				16.568	0.751867			35.045	1.59036
									14.214	0.366599																								29.564	1.12591			85.991	3.27488				12.854	0.583323			57.341	2.60217
									12.219	0.315145																								44.723	1.70323			45.169	1.72021				23.964	1.0875			22.729	1.03146
									14.244	0.367373																								10.013	0.381334			79.259	3.0185				14.659	0.665235			20.002	0.907704
									9.879	0.254793																								10.948	0.416943			24.774	0.943492				27.451	1.24574			17.962	0.815127
									8.918	0.230008																								23.151	0.881681			56.81	2.16355				6.811	0.309088			17.914	0.812949
									29.126	0.7512																								18.435	0.702077			41.874	1.59473				10.233	0.46438			14.614	0.663193
									11.325	0.292088																								16.12	0.613913			40.418	1.53928				26.798	1.21611			24.096	1.09349
									16.064	0.414313																								32.537	1.23914			41.628	1.58536				9.693	0.439875			31.629	1.43534
									11.762	0.303358																								20.326	0.774094			66.612	2.53685				31.395	1.42473			51.206	2.32376
									3.813	0.0983426																								31.894	1.21465			57.923	2.20594				25.562	1.16002			35.128	1.59413
									15.118	0.389914																								23.817	0.907045			57.02	2.17155				90.406	4.10268			20.714	0.940015
									14.773	0.381016																								33.642	1.28122			44.761	1.70468				25.21	1.14405			32.763	1.48681
									12.288	0.316925																								19.745	0.751967			71.225	2.71253				10.948	0.496827			21.903	0.993972
									13.981	0.36059																								22.084	0.841046			58.593	2.23145				14.729	0.668411			23.575	1.06985
									4.118	0.106209																								11.817	0.450038			27.834	1.06003				13.893	0.630473			16.968	0.770019
									14.156	0.365103																								13.092	0.498595			30.855	1.17508				21.386	0.97051			29.96	1.3596
									7.66	0.197562																								24.274	0.92445			105.623	4.02254				28.173	1.27851			43.058	1.954
									9.372	0.241717																								34.752	1.32349			117.867	4.48884				13.845	0.628295			18.949	0.859918
									2.293	0.0591397																								31.1	1.18441			83.732	3.18884				34.605	1.5704			19.801	0.898582
									3.501	0.0902957																								29.35	1.11776			78.023	2.97142				9.156	0.415505			29.567	1.34177
									13.013	0.335623																								15.178	0.578038			66.228	2.52222				26.046	1.18198			25.491	1.1568
									14.939	0.385298																								162.127	6.17443			67.303	2.56316				19.22	0.872216			28.885	1.31082
									10.149	0.261757																								18.747	0.71396			81.116	3.08922				14.349	0.651167			40.037	1.8169
									10.548	0.272048																								37.744	1.43744			55.248	2.10406				29.543	1.34068			36.342	1.64922
									9.51	0.245276																								16.915	0.64419			80.441	3.06351				45.624	2.07045			45.973	2.08628
									14.271	0.368069																								151.6	5.77353			74.117	2.82267				16.7	0.757857			52.571	2.38571
									12.448	0.321051																								27.5	1.04731			76.305	2.906				11.332	0.514253			22.156	1.00545
									13.64	0.351795																								11.181	0.425817								16.245	0.737209			33.883	1.53763
									10.382	0.267766																								144.274	5.49452								18.547	0.841675			22.246	1.00954
									14.122	0.364226																								98.41	3.74784								23.723	1.07657			36.738	1.66719
									33.954	0.875721																								24.747	0.942463								8.906	0.40416			46.205	2.09681
									8.904	0.229647																								66.721	2.541								4.08	0.185153			24.107	1.09399
									22.009	0.567643																								16.819	0.640534								4.101	0.186106			21.599	0.980177
									11.439	0.295028																								10.844	0.412982								9.935	0.450857			32.406	1.47061
									11.155	0.287703																								20.145	0.767201								4.475	0.203078			36.533	1.65789
									11.958	0.308414																								59.937	2.28264								7.769	0.352562			39.223	1.77996
									13.95	0.35979																								13.209	0.503051								18.714	0.849253			35.87	1.6278
									15.657	0.403816																								120.848	4.60237								22.386	1.01589			28.958	1.31413
									13.935	0.359403																								21.636	0.823984								23.864	1.08296			29.715	1.34849
									15.587	0.402011																								29.595	1.12709								8.549	0.387959			21.229	0.963386
									9.903	0.255412																								13.74	0.523273								21.081	0.956669			41.348	1.8764
									10.085	0.260106																								25.424	0.968246								25.171	1.14228			48.181	2.18648
									16.609	0.428369																								23.621	0.899581								25.944	1.17736			54.576	2.47669
									16.514	0.425919																								23.918	0.910892								15.066	0.683705			13.028	0.591219
									14.46	0.372944																								16.831	0.640991								14.336	0.650577			37.419	1.6981
									14.412	0.371706																								20.007	0.761945								5.183	0.235208			22.651	1.02792
									12.937	0.333663																								20.596	0.784377								31.122	1.41234			20.144	0.914148
									4.512	0.116371																								22.178	0.844626								8.202	0.372212			45.775	2.0773
									3.746	0.0966146																								19.827	0.75509								4.823	0.218871			31.982	1.45136
									14.027	0.361776																								26.716	1.01745								25.749	1.16851			18.746	0.850706
									31.437	0.810804																								22.122	0.842493								6.928	0.314397			46.571	2.11342
									31.463	0.811475																								27.775	1.05778								10.775	0.488976			28.365	1.28722
									29.927	0.771859																								21.971	0.836742								10.691	0.485164			36.503	1.65653
									13.054	0.336681																								26.058	0.992391								15.007	0.681027			35.88	1.62826
									17.603	0.454006																								24.938	0.949737								29.911	1.35738			59.24	2.68835
									13.104	0.337971																								18.759	0.714417								16.414	0.744878			50.142	2.27548
									13.785	0.355534																								23.898	0.91013								10.282	0.466604			16.499	0.748735
									21.173	0.546081																								12.236	0.465995								32.609	1.47982			25.183	1.14282
									29.919	0.771653																								19.56	0.744922								23.468	1.06499			24.733	1.1224
									14.802	0.381764																								13.148	0.500728								11.094	0.503453			49.398	2.24171
									11.56	0.298149																								24.764	0.943111								24.039	1.09091			40.634	1.844
									15.866	0.409206																								15.377	0.585617								21.424	0.972235			31.788	1.44256
									14.427	0.372093																								35.242	1.34215								9.23	0.418863			34.951	1.5861
									33.769	0.87095																								7.663	0.291837								24.128	1.09494			25.157	1.14164
									12.558	0.323888																								20.886	0.795421								19.515	0.885603			15.735	0.714064
									12.665	0.326648																								20.78	0.791384								22.747	1.03227			4.89	0.221911
									7.357	0.189747																								25.796	0.982413								31.955	1.45014			6.626	0.300692
									7.654	0.197407																								18.434	0.702039								23.971	1.08782			17.822	0.808774
									15.37	0.396414																								36.487	1.38957								9.434	0.428121			16.254	0.737617
									15.155	0.390869																								8.71	0.331711								22.256	1.00999			30.181	1.36963
									15.751	0.40624																								9.156	0.348697								29.473	1.3375			21.725	0.985894
									3.263	0.0841573																								21.638	0.82406								18.658	0.846712			7.186	0.326105
									10.815	0.278934																								6.058	0.230713								17.388	0.789079			26.204	1.18915
									17.027	0.43915																								19.401	0.738867								26.942	1.22265			28.715	1.30311
									9.25	0.23857																								29.163	1.11064								22.198	1.00736			10.851	0.492425
									3.704	0.0955313																								39.027	1.4863								24.27	1.10139			39.278	1.78246
									2.237	0.0576954																								28.794	1.09659								24.314	1.10338			47.63	2.16148
									10.933	0.281977																								45.231	1.72257								25.104	1.13924			46.228	2.09786
									10.812	0.278857																								23.508	0.895277								39.549	1.79476			39.645	1.79912
									11.147	0.287497																								33.888	1.29059								22.118	1.00373			26.022	1.1809
									13.861	0.357495																								30.324	1.15486								7.276	0.33019			16.962	0.769746
									14.171	0.36549																								25.285	0.962952								25.909	1.17577			20.678	0.938381
									19.033	0.490888																								27.753	1.05694								7.053	0.32007			28.744	1.30442
									2.942	0.0758783																								29.123	1.10912								13.092	0.594123			31.698	1.43848
									2.206	0.0568958																								22.718	0.865191								19.577	0.888417			35.263	1.60026
									3.52	0.0907857																								35.837	1.36481								7.813	0.354559			25.19	1.14314
									1.878	0.0484362																								22.28	0.84851								25.725	1.16742			66.951	3.03828
									3.586	0.092488																								36.389	1.38584								9.395	0.426351			27.447	1.24556
									18.751	0.483615																								20.891	0.795612								15.524	0.704489			41.876	1.90036
									19.196	0.495092																								30.435	1.15908								16.418	0.745059			10.228	0.464153
									2.481	0.0639885																								19.362	0.737381								16.273	0.738479			30.795	1.3975
									15.919	0.410573																								28.358	1.07998								14.097	0.639731			39.252	1.78128
									15.308	0.394815																								29.951	1.14065								13.331	0.604969			29.263	1.32797
									8.351	0.215384																								27.047	1.03006								16.73	0.759218			52.451	2.38026
									18.486	0.47678																								22.674	0.863515								14.584	0.661831			23.34	1.05918
									3.943	0.101695																								31.748	1.20909								24.322	1.10375			13.517	0.61341
									13.196	0.340343																								21.384	0.814387								9.403	0.426714			44.977	2.04109
									14.088	0.363349																								31.715	1.20783								25.507	1.15752			34.616	1.5709
									4.502	0.116113																								23.161	0.882062								20.992	0.95263			48.975	2.22252
									16.647	0.429349																								37.959	1.44563								26.88	1.21983			34.402	1.56118
									3.412	0.0880003																								23.731	0.90377								20.737	0.941058			60.932	2.76513
									20.963	0.540665																								18.065	0.687986								18.868	0.856242			29.579	1.34231
									13.409	0.345837																								17.083	0.650588								24.809	1.12585			43.713	1.98372
									19.889	0.512965																								25.814	0.983099								11.951	0.542344			40	1.81523
									22.245	0.57373																								36.86	1.40377								18.242	0.827834			7.897	0.358371
									12.445	0.320974																								26.013	0.990678								17.901	0.812359			43.229	1.96176
									15.036	0.387799																								23.932	0.911425								20.471	0.928987			37.176	1.68707
									7.316	0.18869																								33.966	1.29356								17.958	0.814946			49.442	2.24371
									18.209	0.469636																								22.15	0.843559								22.217	1.00822			52.729	2.39288
									9.452	0.24378																								27.314	1.04022								16.049	0.728314			29.571	1.34195
									14.242	0.367321																								42.07	1.60219								16.49	0.748327			40.595	1.84223
									12.457	0.321283																								32.215	1.22687								31.842	1.44501			35.124	1.59395
									9.766	0.251879																								17.746	0.675838								30.492	1.38375			51.751	2.34849
									14.087	0.363323																								24.08	0.917061								18.646	0.846167			34.724	1.5758
									2.723	0.07023																								31.619	1.20418								19.887	0.902485			23.102	1.04838
									2.871	0.0740471																								31.907	1.21514								50.72	2.30171			39.623	1.79812
									17.604	0.454032																								16.943	0.645256								36.597	1.6608			33.293	1.51086
									9.856	0.2542																								36.969	1.40793								37.325	1.69383			37.277	1.69165
									15.729	0.405673																								39.954	1.52161								19.72	0.894906			13.524	0.613728
									21.793	0.562072																								22.866	0.870827								19.909	0.903483			81.128	3.68164
									13.736	0.354271																								24.907	0.948557								31.288	1.41987			34.574	1.56899
									9.58	0.247082																								18.4	0.700744								20.321	0.92218			26.263	1.19183
									13.949	0.359764																								35.487	1.35148								60.007	2.72316			23.697	1.07539
									11.241	0.289921																								20.397	0.776798								17.027	0.772696			40.542	1.83982
									14.67	0.37836																								63.412	2.41498								23.799	1.08001			21.611	0.980721
									10.55	0.272099																								20.848	0.793974								26.759	1.21434			19.411	0.880884
									13.177	0.339853																								17.315	0.659423								32.45	1.4726			22.438	1.01825
									43.575	1.12386																								10.401	0.396111								7.779	0.353016			35.06	1.59105
									3.643	0.0939581																								23.128	0.880805								35.695	1.61986			57.325	2.60145
									3.256	0.0839768																								31.667	1.206								19.851	0.900851			23.543	1.0684
									12.413	0.320149																								23.003	0.876045								14.309	0.649352			21.579	0.979269
									11.37	0.293248																								20.944	0.79763								32.071	1.4554			53.699	2.4369
									10.009	0.258146																								14.085	0.536412								14.522	0.659018			34.204	1.5522
									16.989	0.43817																								26.074	0.993001								35.996	1.63352			2.459	0.111591
									2.167	0.05589																								25.249	0.961581								17.376	0.788534			18.54	0.841357
									15.273	0.393912																								21.448	0.816824								78.114	3.54486			24.582	1.11555
									3.105	0.0800823																								36.868	1.40408								38.019	1.72533			29.152	1.32294
									12.305	0.317363																								23.549	0.896839								20.737	0.941058			34.589	1.56967
									14.255	0.367656																								18.312	0.697393								23.378	1.06091			34.725	1.57584
									16.128	0.415964																								12.995	0.494901								22.206	1.00772			42.726	1.93893
									13.32	0.343541																								14.983	0.570612								14.168	0.642953			50.944	2.31187
									9.83	0.253529																								23.592	0.898476								22.424	1.01762			52.857	2.39868
									13.295	0.342897																								34.974	1.33195								34.81	1.5797			46.422	2.10666
									21.002	0.541671																								15.172	0.57781								11.409	0.517748			41.665	1.89078
									14.444	0.372531																								17.259	0.657291								16.701	0.757902			27.762	1.25986
									15.499	0.399741																								11.866	0.451904								18.055	0.819348			23.775	1.07892
									15.772	0.406782																								23.251	0.88549								10.056	0.456348			41.817	1.89768
									17.307	0.446372																								32.855	1.25125								9.7	0.440192			57.202	2.59586
									3.676	0.0948092																								36.047	1.37281								23.233	1.05433			33.673	1.5281
									15.981	0.412172																								62.323	2.37351								15.787	0.716424			37.772	1.71412
									9.418	0.242903																								13.202	0.502784								23.832	1.08151			20.378	0.924767
									15.607	0.402526																								22.422	0.853918								51.694	2.34591			33.895	1.53818
									7.003	0.180617																								23.468	0.893754								23.248	1.05501			38.755	1.75873
									12.653	0.326339																								34.511	1.31431								22.311	1.01249			32.119	1.45758
									10.904	0.281229																								19.885	0.757299								24.707	1.12122			34.63	1.57153
									15.49	0.399509																								25.336	0.964895								21.056	0.955535			33.087	1.50151
									13.873	0.357804																								26.909	1.0248								16.343	0.741656			52.999	2.40513
									6.667	0.171951																								12.719	0.48439								30.487	1.38352			26.172	1.1877
									15.712	0.405234																								27.21	1.03626								16.505	0.749008			7.798	0.353878
									12.007	0.309677																								20.603	0.784643								17.135	0.777597			24.695	1.12067
									9.154	0.236094																								18.324	0.69785								16.066	0.729085			36.83	1.67137
									14.764	0.380784																								23.497	0.894858								27.509	1.24838			7.782	0.353152
									13.823	0.356515																								16.895	0.643428								17.365	0.788035			33.997	1.54281
									15.564	0.401417																								27.694	1.0547								23.074	1.04711			37.183	1.68739
									9.99	0.257656																								31.677	1.20638								20.655	0.937337			27.054	1.22773
									8.754	0.225778																								20.523	0.781597								26.196	1.18879			45.015	2.04281
									10.155	0.261912																								24.485	0.932485								13.69	0.621261			44.73	2.02988
									11.552	0.297942																								11.541	0.439527								23.927	1.08582			40.178	1.8233
									14.446	0.372583																								27.808	1.05904								24.086	1.09304			36.384	1.65113
									9.014	0.232484																								17.669	0.672905								11.023	0.500231			26.92	1.22165
									8.937	0.230498																								27.642	1.05272								21.059	0.955671			12.868	0.583958
									7.073	0.182423																								20.829	0.79325								21.001	0.953039			22.407	1.01684
									8.264	0.21314																								18.535	0.705886								17.631	0.800106			38.143	1.73095
									7.439	0.191862																								36.826	1.40248								27.033	1.22677			52.271	2.37209
									17.362	0.44779																								11.197	0.426426								25.138	1.14078			31.454	1.4274
									13.999	0.361054																								28.35	1.07968								26.175	1.18784			45.538	2.06654
									3.51	0.0905278																								19.995	0.761488								10.718	0.48639			30.047	1.36355
									2.471	0.0637305																								37.996	1.44704								48.11	2.18326			32.133	1.45822
									12.263	0.31628																								20.599	0.784491								49.165	2.23114			16.545	0.750823
									15.408	0.397394																								19.171	0.730107								20.323	0.922271			33.623	1.52583
									10.127	0.26119																								28.371	1.08048								29.227	1.32634			28.233	1.28123
									25.576	0.659641																								20.055	0.763773								39.517	1.79331			39.841	1.80801
									16.084	0.414829																								19.482	0.741951								3.921	0.177938			40.563	1.84078
									2.963	0.0764199																								20.256	0.771428								15.92	0.72246			29.721	1.34876
									11.839	0.305344																								23.306	0.887584								49.254	2.23518			35.022	1.58932
									12.306	0.317389																								30.579	1.16457								28.97	1.31468			45.731	2.0753
									18.709	0.482531																								22.737	0.865915								44.403	2.01504			20.55	0.932572
									10.195	0.262943																								25.318	0.964209								34.563	1.56849			29.343	1.3316
									10.786	0.278186																								12.747	0.485456								20.01	0.908067			19.269	0.87444
									14.517	0.374414																								34.17	1.30133								29.404	1.33437			27.7	1.25704
									12.145	0.313237																								15.089	0.574649								21.189	0.96157			33.843	1.53582
									13.392	0.345398																								31.1	1.18441								17.831	0.809182			48.282	2.19107
									14.192	0.366032																								21.35	0.813092								24.119	1.09454			16.124	0.731717
									20.221	0.521528																								21.782	0.829544								24.071	1.09236			49.578	2.24988
									15.383	0.396749																								22.96	0.874407								31.37	1.42359			43.539	1.97583
									15.792	0.407298																								18.309	0.697279								33.479	1.5193			18.58	0.843172
									17.26	0.44516																								21.15	0.805475								32.298	1.4657			41.996	1.90581
									15.053	0.388238																								12.632	0.481076								35.372	1.6052			29.955	1.35938
									14.997	0.386794																								27.426	1.04449								83.075	3.77			68.061	3.08865
									8.235	0.212392																								19.888	0.757413								24.687	1.12031			24.479	1.11087
									10.146	0.26168																								19.887	0.757375								35.607	1.61587			40.508	1.83828
									3.012	0.0776837																								32.941	1.25452								15.459	0.701539			26.594	1.20685
									8.081	0.20842																								19.213	0.731707								8.847	0.401483			41.958	1.90408
																																		21.383	0.814349								22.043	1.00033			45.277	2.0547
																																		26.129	0.995095								15.539	0.70517			49.305	2.23749
																																		26.017	0.99083								23.116	1.04902			23.244	1.05483
																																		26.23	0.998942								22.501	1.02111			30.423	1.38062
																																		22.632	0.861916								20.903	0.948592			17.371	0.788307
																																		26.802	1.02073								24.105	1.0939			32.901	1.49307
																																		27.89	1.06216								19.289	0.875347			21.596	0.98004
																																		27.127	1.0331								15.693	0.712158			9.151	0.415278
																																		28.676	1.0921								15.895	0.721325			12.93	0.586772
																																		25.24	0.961239								15.407	0.69918			24.577	1.11532
																																		13.472	0.513067								29.622	1.34427			28.317	1.28504
																																		22.345	0.850986								16.009	0.726499			16.805	0.762622
																																		22.612	0.861154								24.525	1.11296			15.111	0.685747
																																		26.834	1.02194								19.415	0.881065			40.051	1.81754
																																		24.56	0.935342								26.211	1.18947			19.228	0.872579
																																		22.054	0.839903								24.358	1.10538			24.849	1.12766
																																		17.354	0.660909								22.071	1.0016			34.567	1.56867
																																		36.764	1.40012								20.542	0.932209			47.52	2.15649
																																		18.917	0.720434								19.961	0.905843			29.403	1.33433
																																		29.836	1.13627								21.358	0.96924			19.601	0.889506
																																		15.286	0.582151								27.524	1.24906			19.687	0.893409
																																		14.835	0.564975								48.521	2.20191			24.191	1.0978
																																		21.62	0.823375								20.32	0.922135			45.526	2.066
																																		20.936	0.797325								41.167	1.86818			25.65	1.16401
																																		16.535	0.629718								3.89	0.176531			37.248	1.69034
																																		15.451	0.588435								19.164	0.869675			29.426	1.33537
																																		26.867	1.0232								21.908	0.994199			25.836	1.17245
																																		18.339	0.698421								24.617	1.11714			36.441	1.65372
																																		23.235	0.88488								7.68	0.348523			38.945	1.76735
																																		29.285	1.11529								20.784	0.943191			31.838	1.44483
																																		27.115	1.03265								23.496	1.06626			23.838	1.08178
																																		29.134	1.10954								25.394	1.1524			32.499	1.47483
																																		12.122	0.461654								33.319	1.51204			42.838	1.94402
																																		21.639	0.824098								18.008	0.817215			32.972	1.49629
																																		24.843	0.946119								37.254	1.69061			49.355	2.23976
																																		20.066	0.764192								7.49	0.339901			23.624	1.07207
																																		25.389	0.966913								20.37	0.924404			28.377	1.28777
																																		17.161	0.653558								21.284	0.965882			42.697	1.93762
																																		22.903	0.872236								14.756	0.669637			37.568	1.70486
																																		15.093	0.574801								22.618	1.02642			10.374	0.470779
																																		19.279	0.73422								11.26	0.510986			28.496	1.29317
																																		17.033	0.648684								34.796	1.57906			30.841	1.39958
																																		19.375	0.737876								16.603	0.753455			26.876	1.21965
																																		27.481	1.04658								18.992	0.861869			38.346	1.74017
																																		16.589	0.631774								22.833	1.03618			31.27	1.41905
																																		21.466	0.81751								9.335	0.423628			43.037	1.95305
																																		26.366	1.00412								15.684	0.71175			47.19	2.14151
																																		20.864	0.794583								22.478	1.02007			25.933	1.17686
																																		36.674	1.39669								52.276	2.37232			31.325	1.42155
																																		20.73	0.78948								21.77	0.987937			30.078	1.36496
																																		14.603	0.55614								22.779	1.03373			26.653	1.20953
																																		15.692	0.597613								19.097	0.866634			31.861	1.44587
																																		26.961	1.02678								19.493	0.884605			34.194	1.55175
																																		16.732	0.63722								31.775	1.44197			25.493	1.15689
																																		20.074	0.764497								16.535	0.750369			20.372	0.924494
																																		26.262	1.00016								15.446	0.700949			48.181	2.18648
																																		20.92	0.796716								16.134	0.732171			70.171	3.18441
																																		26.96	1.02674								22.849	1.0369			38.881	1.76444
																																		23.17	0.882405								12.205	0.553871			35.359	1.60461
																																		25.248	0.961543								21.08	0.956624			21.902	0.993927
																																		27.714	1.05546								27.231	1.23576			51.019	2.31528
																																		20.591	0.784186								24.112	1.09422			44.422	2.0159
																																		16.631	0.633374								24.493	1.11151			61.198	2.7772
																																		19.242	0.732811								13.028	0.591219			68.309	3.09991
																																		20.06	0.763964								11.383	0.516568			43.416	1.97025
																																		25.584	0.97434								14.023	0.636373			45.412	2.06083
																																		18.438	0.702192								20.728	0.94065			39.659	1.79975
																																		15.883	0.604887								21.259	0.964747			54.086	2.45446
																																		15.138	0.576515								19.893	0.902757			34.649	1.57239
																																		27.423	1.04438								16.6	0.753319			41.763	1.89523
																																		17.562	0.66883								28.835	1.30855			39.881	1.80983
																																		18.613	0.708856								21.286	0.965972			23.976	1.08805
																																		9.182	0.349687								26.741	1.21352			35.148	1.59504
																																		18.825	0.71693								11.987	0.543978			36.181	1.64192
																																		16.218	0.617645								51.84	2.35253			33.665	1.52774
																																		22.932	0.873341								52.006	2.36007			9.036	0.410059
																																		24.701	0.940711								20.722	0.940378			35.388	1.60593
																																		12.353	0.470451								41.711	1.89287			41.721	1.89333
																																		24.608	0.93717								3.943	0.178936			57.336	2.60194
																																		18.493	0.704286								19.562	0.887736			18.794	0.852884
																																		25.893	0.986107								21.559	0.978361			43.112	1.95645
																																		22.138	0.843102								25.531	1.15861			29.432	1.33564
																																		12.191	0.464281								7.206	0.327013			40.861	1.8543
																																		17.527	0.667497								21.711	0.985259			42.917	1.9476
																																		21.939	0.835524								24.582	1.11555			31.971	1.45086
																																		22.108	0.84196								26.851	1.21852			48.559	2.20364
																																		27.483	1.04666								11.836	0.537125			58.742	2.66575
																																		12.778	0.486637								15.587	0.707348			23.51	1.0669
																																		16.591	0.631851								4.645	0.210793			42.881	1.94597
																																		22.224	0.846377								31.915	1.44832			35.522	1.61201
																																		20.034	0.762974								7.164	0.325107			74.653	3.3878
																																		27.694	1.0547								3.966	0.17998			38.068	1.72755
																																		25.305	0.963714								5.184	0.235253			32.703	1.48408
																																		24.483	0.932409								23.918	1.08541			33.892	1.53804
																																		26.478	1.00839								10.769	0.488704			29.818	1.35316
																																		21.645	0.824327								10	0.453806			57.253	2.59818
																																		13.301	0.506554								12.431	0.564127			47.254	2.14442
																																		23.747	0.904379								6.916	0.313853			54.848	2.48904
																																		21.86	0.832515								14.616	0.663283			38.577	1.75065
																																		19.875	0.756918								35.656	1.61809			61.083	2.77199
																																		17.741	0.675647								29.073	1.31935			58.135	2.6382
																																		26.083	0.993343								4.901	0.222411			56.126	2.54703
																																		18.028	0.686577								16.515	0.749461			57.477	2.60834
																																		20.635	0.785862								20.768	0.942465			44.827	2.03428
																																		23.059	0.878178								37.86	1.71811			31.808	1.44347
																																		17.78	0.677132								16.883	0.766161			35.805	1.62485
																																		14.514	0.55275								39.582	1.79626			64.345	2.92002
																																		27.05	1.03017								25.233	1.14509			45.589	2.06886
																																		29.835	1.13623								8.426	0.382377			39.676	1.80052
																																		22.398	0.853004								18.903	0.85783			23.018	1.04457
																																		23.83	0.90754								21.995	0.998147			30.869	1.40086
																																		50.4	1.91943								21.791	0.98889			15.57	0.706577
																																		22.024	0.838761								20.731	0.940786			29.761	1.35057
																																		22.21	0.845844								20.373	0.92454			40.748	1.84917
																																		19.852	0.756042								21.082	0.956715			44.811	2.03355
																																		93.798	3.5722								12.399	0.562675			3.724	0.168998
																																		40.082	1.52648								13.336	0.605196			46.13	2.09341
																																		15.944	0.60721								17.366	0.78808			45.514	2.06545
																																		26.55	1.01113								23.043	1.04571			31.924	1.44873
																																		23.785	0.905827								13.403	0.608237			4.241	0.192459
																																		22.465	0.855556								16.415	0.744923			25.442	1.15457
																																		25.692	0.978453								17.069	0.774602			24.012	1.08968
																																		34.527	1.31492								5.329	0.241833			54.964	2.4943
																																		24.952	0.95027								42.346	1.92169			40.632	1.84391
																																		25.651	0.976891								4.935	0.223953			13.883	0.630019
																																		22.274	0.848282								11.787	0.534902			54.409	2.46912
																																		21.265	0.809855								16.796	0.762213			21.629	0.981538
																																		29.554	1.12553								20.448	0.927943			45.822	2.07943
																																		19.698	0.750177								13.592	0.616814			29.959	1.35956
																																		36.637	1.39528								22.398	1.01644			32.563	1.47773
																																		14.317	0.545248								21.798	0.989207			34.501	1.56568
																																		22.874	0.871132								63.062	2.86179			25.349	1.15035
																																		21.202	0.807456								15.676	0.711387			40.239	1.82607
																																		21.916	0.834648								13.275	0.602428			42.197	1.91493
																																		36.795	1.4013								18.052	0.819211			31.722	1.43956
																																		22.716	0.865115								14.48	0.657112			50.814	2.30597
																																		29.86	1.13719								23.745	1.07756			40.574	1.84127
																																		22.178	0.844626								11.799	0.535446			39.446	1.79008
																																		18.232	0.694346								33.821	1.53482			40.588	1.84191
																																		31.34	1.19355								23.171	1.05151			18.707	0.848936
																																		27.546	1.04906								27.461	1.2462			27.68	1.25614
																																		23.011	0.87635								20.313	0.921817			53.327	2.42001
																																		25.908	0.986679								21.501	0.975729			46.589	2.11424
																																		25.417	0.96798								20.067	0.910653			30.899	1.40222
																																		33.341	1.26976								33.375	1.51458			29.053	1.31844
																																		16.619	0.632917								16.774	0.761215			33.49	1.5198
																																		23.725	0.903541								12.945	0.587452			36.892	1.67418
																																		13.245	0.504422								20.023	0.908657			34.327	1.55778
																																		24.894	0.948062								16.429	0.745559			39.96	1.81341
																																		14.002	0.533251								21.552	0.978044			20.828	0.945188
																																		32.853	1.25117								18.804	0.853338			16.736	0.75949
																																		33.506	1.27604								32.251	1.46357			37.622	1.70731
																																		15.867	0.604278								25.029	1.13583			27.552	1.25033
																																		35.588	1.35533								14.756	0.669637			17.734	0.80478
																																		80.046	3.04847								23.07	1.04693			37.885	1.71925
																																		25.117	0.956554								21.631	0.981629			12.976	0.588859
																																		17.532	0.667688								28.628	1.29916			34.864	1.58215
																																		33.31	1.26858								44.989	2.04163			52.589	2.38652
																																		38.35	1.46052								18.3	0.830466			25.06	1.13724
																																		43.546	1.6584								16.876	0.765844			41.175	1.86855
																																		41.012	1.5619								7.989	0.362546			5.45	0.247325
																																		27.027	1.02929								13.447	0.610234			52.534	2.38403
																																		31.424	1.19675								31.002	1.40689			48.535	2.20255
																																		20.789	0.791727								21.193	0.961752			32.681	1.48308
																																		24.531	0.934237								27.528	1.24924			41.923	1.90249
																																		32.054	1.22074								25.301	1.14818			19.864	0.901441
																																		26.122	0.994829								8.997	0.40829			67.107	3.04536
																																		42.845	1.63171								38.537	1.74883			32.381	1.46947
																																		31.738	1.20871								9.39	0.426124			40.276	1.82775
																																		21.505	0.818995								22.26	1.01017			26.841	1.21806
																																		27.552	1.04929								23.146	1.05038			75.111	3.40859
																																		22.341	0.850833								19.517	0.885694			69.966	3.1751
																																		23.092	0.879434								7.71	0.349885			51.92	2.35616
																																		24.556	0.935189								24.789	1.12494			26.915	1.22142
																																		34.303	1.30639								26.86	1.21892			23.24	1.05465
																																		35.665	1.35826								17.167	0.77905			43.924	1.9933
																																		22.709	0.864848								11.01	0.499641			100.777	4.57333
																																		37.117	1.41356								26.484	1.20186			27.173	1.23313
																																		28.699	1.09297								13.386	0.607465			18.658	0.846712
																																		19.923	0.758746								17.501	0.794207			24.286	1.10211
																																		18.147	0.691109								11.123	0.504769			32.675	1.48281
																																		24.743	0.942311								19.541	0.886783			34.324	1.55765
																																		24.289	0.925021								46.026	2.08869			22.895	1.03899
																																		19.271	0.733916								21.361	0.969376			31.059	1.40948
																																		19.538	0.744084								43.484	1.97333			17.2	0.780547
																																		23.133	0.880996								8.979	0.407473			22.893	1.0389
																																		16.283	0.620121								13.815	0.626934			49.62	2.25179
																																		12.609	0.4802								15.745	0.714518			42.46	1.92686
																																		38.702	1.47392								24.272	1.10148			32.005	1.45241
																																		28.324	1.07869								14.861	0.674402			66.172	3.00293
																																		43.123	1.64229								27.698	1.25695			38.172	1.73227
																																		27.276	1.03878								13.729	0.623031			33.787	1.53328
																																		18.521	0.705353								23.107	1.04861			23.908	1.08496
																																		26.513	1.00972								15.347	0.696457			47.285	2.14582
																																		23.864	0.908835								8.843	0.401301			34.663	1.57303
																																		30.323	1.15482								22.635	1.02719			36.232	1.64423
																																		12.88	0.490521								22.435	1.01811			51.926	2.35644
																																		26.098	0.993915								33.779	1.53291			28.632	1.29934
																																		22.408	0.853385								10.248	0.465061			40.201	1.82435
																																		18.047	0.687301								17.484	0.793435			51.1	2.31895
																																		30.531	1.16274								23.593	1.07067			61.513	2.7915
																																		24.536	0.934428								17.111	0.776508			45.467	2.06332
																																		21.91	0.834419								26.874	1.21956			37.407	1.69755
																																		25.197	0.959601								21.748	0.986938			46.319	2.10199
																																		27.573	1.05009								19.561	0.887691			41.418	1.87958
																																		22.392	0.852776								15.587	0.707348			35.831	1.62603
																																		16.851	0.641752								11.848	0.53767			51.902	2.35535
																																		24.76	0.942958								22.767	1.03318			37.735	1.71244
																																		27.774	1.05774								25.649	1.16397			42.838	1.94402
																																		10.27	0.391122								13.46	0.610823			53	2.40517
																																		22.739	0.865991								16.72	0.758764			32.957	1.49561
																																		20.637	0.785938								9.409	0.426986			8.799	0.399304
																																		19.18	0.73045								22.03	0.999736			30.195	1.37027
																																		21.857	0.832401								23.766	1.07852			54.659	2.48046
																																		26.791	1.02031								14.373	0.652256			21.126	0.958711
																																		28.211	1.07439								19.836	0.90017			47.22	2.14287
																																		14.36	0.546885								11.484	0.521151			45.823	2.07948
																																		17.861	0.680217								16.204	0.735348			52.405	2.37817
																																		37.767	1.43832								20.328	0.922498			46.639	2.11651
																																		50.604	1.9272								19.169	0.869902			18.701	0.848663
																																		40.135	1.5285								23.727	1.07675			33.594	1.52452
																																		27.886	1.06201								17.566	0.797156			6.452	0.292796
																																		20.748	0.790166								17.061	0.774239			33.151	1.50441
																																		27.154	1.03413								19.862	0.90135			39.687	1.80102
																																		16.603	0.632308								38.292	1.73772			40.854	1.85398
																																		35.767	1.36215								25.812	1.17137			33.246	1.50872
																																		23.693	0.902323								12.066	0.547563			21.451	0.97346
																																		27.144	1.03375								12.023	0.545611			28.463	1.29167
																																		22.795	0.868123								21.905	0.994063			39.072	1.77311
																																		44.708	1.70266								10.191	0.462474			23.012	1.0443
																																		18.771	0.714874								17.239	0.782317			18.983	0.861461
																																		27.813	1.05923								25.225	1.14473			31.587	1.43344
																																		25.667	0.9775								24.826	1.12662			29.951	1.3592
																																		24.356	0.927572								22.193	1.00713			50.721	2.30175
																																		29.089	1.10782								14.028	0.6366			41.312	1.87477
																																		26.198	0.997723								21.56	0.978407			74.596	3.38521
																																		16.976	0.646513								23.816	1.08079			31.813	1.44369
																																		30.792	1.17268								18.26	0.828651			32.056	1.45472
																																		45.032	1.715								15.289	0.693825			51.77	2.34936
																																		38.525	1.46718								23.434	1.06345			41.222	1.87068
																																		26.549	1.01109								15.924	0.722641			26.965	1.22369
																																		26.557	1.0114								30.654	1.3911			34.071	1.54616
																																		19.153	0.729422								25.994	1.17962			29.37	1.33283
																																		17.672	0.673019								14.761	0.669864			46.722	2.12027
																																		33.025	1.25772								13.939	0.632561			35.228	1.59867
																																		22.37	0.851938								15.388	0.698317			36.339	1.64909
																																		27.575	1.05016								10.293	0.467103			19.073	0.865545
																																		22.066	0.84036								14.367	0.651984			35.046	1.59041
																																		15.86	0.604011								16.748	0.760035			54.43	2.47007
																																		12.24	0.466147								21.536	0.977318			45.913	2.08356
																																		24.994	0.95187								14.752	0.669455			84.599	3.83916
																																		9.543	0.363435								9.813	0.44532			51.942	2.35716
																																		11.158	0.424941								9.815	0.445411			32.862	1.4913
																																		22.777	0.867438								34.007	1.54326			68.628	3.11438
																																		15.471	0.589197								12.058	0.5472			93.185	4.2288
																																		15.567	0.592853								17.489	0.793662			39.684	1.80089
																																		15.438	0.58794								12.404	0.562902			55.568	2.52171
																																		16.698	0.635926								11.876	0.538941			53.559	2.43054
																																		19.543	0.744274								15.292	0.693961			46.81	2.12427
																																		23.832	0.907616								23.985	1.08845			29.63	1.34463
																																		22.359	0.851519								32.631	1.48082			26.56	1.20531
																																		18.228	0.694194								14.56	0.660742			67.453	3.06106
																																		24.247	0.923421								15.667	0.710979			38.815	1.76145
																																		20.055	0.763773								9.67	0.438831			64.663	2.93445
																																		18.966	0.7223								11.631	0.527822			50.098	2.27348
																																		21.41	0.815377								17.427	0.790848			32.599	1.47936
																																		26.2	0.997799								19.289	0.875347			71.618	3.25007
																																		19.341	0.736581								26.175	1.18784			44.845	2.03509
																																		23.298	0.88728								18.661	0.846848			58.152	2.63898
																																		23.318	0.888041								22.099	1.00287			48.995	2.22342
																																		7.795	0.296864								22.671	1.02882			43.601	1.97864
																																		19.53	0.743779								17.913	0.812903			72.295	3.28079
																																		20.688	0.787881								13.416	0.608827			33.003	1.4977
																																		9.739	0.370899								24.307	1.10307			37.067	1.68212
																																		18.995	0.723404								19.234	0.872851			46.736	2.12091
																																		20.7	0.788338								9.738	0.441917			12.286	0.557547
																																		13.703	0.521864								22.449	1.01875			35.234	1.59894
																																		22.458	0.855289								13.094	0.594214			42.592	1.93285
																																		16.064	0.61178								21.377	0.970102			56.3	2.55493
																																		16.367	0.62332								7.956	0.361048			9.066	0.411421
																																		18.748	0.713998								16.822	0.763393			21.868	0.992384
																																		19.541	0.744198								18.933	0.859192			48.159	2.18549
																																		16.699	0.635964								9.046	0.410513			46.14	2.09386
																																		20.856	0.794279								19.928	0.904345			21.914	0.994471
																																		19.624	0.747359								7.212	0.327285			29.45	1.33646
																																		46.454	1.76915								19.768	0.897085			31.78	1.4422
																																		21.97	0.836704								21.184	0.961344			39.009	1.77025
																																		23.396	0.891012								15.524	0.704489			40.394	1.83311
																																		10.928	0.416181								19.182	0.870492			34.919	1.58465
																																		13.863	0.527958								37.218	1.68898			42.375	1.923
																																		15.284	0.582075								25.318	1.14895			44.966	2.04059
																																		22.422	0.853918								18.642	0.845986			46.371	2.10435
																																		21.32	0.81195								19.922	0.904073			46.205	2.09681
																																		19.285	0.734449								52.034	2.36134			25.575	1.16061
																																		13.309	0.506859								8.839	0.40112			26.534	1.20413
																																		10.62	0.404451								16.63	0.75468			26.341	1.19537
																																		26.652	1.01501								21.809	0.989706			41.649	1.89006
																																		22.445	0.854794								27.654	1.25496			22.702	1.03023
																																		18.922	0.720624								12.392	0.562357			64.16	2.91162
																																		23.09	0.879358								36.046	1.63579			28.139	1.27697
																																		16.492	0.62808								24.423	1.10833			5.672	0.257399
																																		29.982	1.14183								9.497	0.43098			23.9	1.0846
																																		18.884	0.719177								19.107	0.867088
																																		17.824	0.678808								21.707	0.985078
																																		10.028	0.381906								4.143	0.188012
																																		15.616	0.594719								23.398	1.06182
																																		13.997	0.533061								18.347	0.832599
																																		18.134	0.690614								10.807	0.490429
																																		13.367	0.509068								42.622	1.93421
																																		12.185	0.464053								20.517	0.931075
																																		19.076	0.726489								41.166	1.86814
																																		21.429	0.816101								15.63	0.709299
																																		17.758	0.676295								12.9	0.58541
																																		24.278	0.924602								44.172	2.00455
																																		21.858	0.832439								22.392	1.01616
																																		19.781	0.753338								19.53	0.886284
																																		20.003	0.761793								25.119	1.13992
																																		16.674	0.635012								22.583	1.02483
																																		16.586	0.63166								20.526	0.931483
																																		25.76	0.981042								27.881	1.26526
																																		17.928	0.682769								14.887	0.675582
																																		20.286	0.772571								25.8	1.17082
																																		19.861	0.756385								21.016	0.95372
																																		17.42	0.663422								9.541	0.432977
																																		20.15	0.767391								9.836	0.446364
																																		12.81	0.487855								17.335	0.786673
																																		14.365	0.547076								29.2	1.32511
																																		8.514	0.324247								25.425	1.1538
																																		15.763	0.600317								24.743	1.12285
																																		17.193	0.654777								8.785	0.398669
																																		13.589	0.517523								10.744	0.48757
																																		21.039	0.801248								27.412	1.24397
																																		16.514	0.628918								45.353	2.05815
																																		16.257	0.619131								23.282	1.05655
																																		19.423	0.739704								46.653	2.11714
																																		12.536	0.47742								12.803	0.581008
																																		34.4	1.31009								25.269	1.14672
																																		50.629	1.92815								19.904	0.903256
																																		39.641	1.50969								17.213	0.781137
																																		31.024	1.18152								12.645	0.573838
																																		46.417	1.76774								26.216	1.1897
																																		36.461	1.38858								38.304	1.73826
																																		40.515	1.54297								33.039	1.49933
																																		43.63	1.6616								24.265	1.10116
																																		36.244	1.38031								19.475	0.883788
																																		35.89	1.36683								12.635	0.573384
																																		40.947	1.55942								19.331	0.877253
																																		42.618	1.62306								14.835	0.673222
																																		39.345	1.49841								11.061	0.501955
																																		35.209	1.3409								23.231	1.05424
																																		39.006	1.4855								16.631	0.754725
																																		38.2	1.45481								19.552	0.887282
																																		36.94	1.40682								25.811	1.17132
																																		39.205	1.49308								23.679	1.07457
																																		40.684	1.54941								13.286	0.602927
																																		43.545	1.65837								11.508	0.52224
																																		43.234	1.64652								19.493	0.884605
																																		34.597	1.31759								8.942	0.405794
																																		29.003	1.10455								16.853	0.7648
																																		49.106	1.87015								23.731	1.07693
																																		45.551	1.73476								17.878	0.811315
																																		40.587	1.54571								19.457	0.882971
																																		42.255	1.60924								16.546	0.750868
																																		17.035	0.64876								15.462	0.701676
																																		47.749	1.81847								14.324	0.650032
																																		38.194	1.45458								7.425	0.336951
																																		37.629	1.43306								15.463	0.701721
																																		45.073	1.71656								21.109	0.95794
																																		39.05	1.48718								9.118	0.413781
																																		34.364	1.30872								9.418	0.427395
																																		31.392	1.19553								32.462	1.47315
																																		30.398	1.15768								17.236	0.782181
																																		28.347	1.07957								26.323	1.19455
																																		34.65	1.31961								7.808	0.354332
																																		32.285	1.22954								22.89	1.03876
																																		21.147	0.805361								25.026	1.1357
																																		31.595	1.20326								15.531	0.704807
																																		41.657	1.58646								12.416	0.563446
																																		26.439	1.0069								14.997	0.680574
																																		37.987	1.44669								23.783	1.07929
																																		35.307	1.34463								19.419	0.881247
																																		66.432	2.52999								13.83	0.627614
																																		16.574	0.631203								19.451	0.882699
																																		25.822	0.983404								19.476	0.883833
																																		43.404	1.653								21.095	0.957305
																																		21.138	0.805018								25.52	1.15811
																																		25.468	0.969922								19.013	0.862822
																																		29.581	1.12656								15.082	0.684431
																																		29.498	1.1234								24.287	1.10216
																																		20.062	0.76404								16.921	0.767886
																																		29.331	1.11704								15.999	0.726045
																																		46.659	1.77696								17.596	0.798518
																																		21.874	0.833048								19.115	0.867451
																																		40.862	1.55619								38.513	1.74774
																																		44.527	1.69576								25.638	1.16347
																																		25.884	0.985765								17.352	0.787445
																																		42.987	1.63711								12.175	0.552509
																																		18.194	0.692899								11.283	0.51203
																																		20.851	0.794088								21.569	0.978815
																																		28.834	1.09811								24.601	1.11641
																																		24.644	0.938541								9.565	0.434066
																																		23.297	0.887242								16.262	0.73798
																																		19.989	0.76126								10.275	0.466286
																																		29.897	1.1386								13.38	0.607193
																																		30.768	1.17177								23.779	1.07911
																																		25.752	0.980738								22.602	1.02569
																																		38.115	1.45157								23.818	1.08088
																																		43.532	1.65787								20.818	0.944734
																																		20.223	0.770172								14.137	0.641546
																																		30.453	1.15977								21.274	0.965428
																																		47.119	1.79448								8.178	0.371123
																																		25.876	0.98546								25.608	1.16211
																																		10.829	0.412411								17.839	0.809545
																																		40.689	1.5496								17.318	0.785902
																																		15.561	0.592624								15.645	0.70998
																																		45.12	1.71835								21.394	0.970873
																																		24.057	0.916185								22.842	1.03658
																																		19.327	0.736048								15.757	0.715063
																																		26.645	1.01475								29.687	1.34722
																																		27.743	1.05656								26.234	1.19052
																																		25.233	0.960972								14.095	0.63964
																																		25.451	0.969274								15.83	0.718376
																																		34.4	1.31009								9.87	0.447907
																																		27.594	1.05089								14.114	0.640502
																																		31.753	1.20928								16.63	0.75468
																																		16.976	0.646513								8.076	0.366494
																																		29.094	1.10801								22.091	1.0025
																																		12.965	0.493758								9.132	0.414416
																																		37.602	1.43203								21.052	0.955353
																																		19.252	0.733192								20.687	0.938789
																																		20.468	0.779502								9.781	0.443868
																																		26.127	0.995019								8.519	0.386598
																																		24.226	0.922622								31.814	1.44374
																																		34.272	1.30521								11.566	0.524873
																																		7.608	0.289743								12.636	0.57343
																																		27.596	1.05096								11.8	0.535492
																																		12.467	0.474792								15.713	0.713066
																																		15.083	0.57442								9.261	0.42027
																																		13.475	0.513181								32.98	1.49665
																																		33.95	1.29295								15.657	0.710525
																																		36.323	1.38332								8.568	0.388821
																																		17.716	0.674695								11.652	0.528775
																																		20.851	0.794088								17.611	0.799199
																																		14.548	0.554045								18.572	0.842809
																																		13.638	0.519389								17.256	0.783088
																																		18.011	0.68593								13.512	0.613183
																																		34.454	1.31214								40.696	1.84681
																																		32.403	1.23403								22.679	1.02919
																																		39.397	1.50039								13.547	0.614772
																																		34.746	1.32326								25.188	1.14305
																																		30.126	1.14732								9.108	0.413327
																																		24.159	0.92007								22.51	1.02152
																																		33.729	1.28453								21.319	0.96747
																																		46.677	1.77764								33.552	1.52261
																																		34.845	1.32703								6.743	0.306002
																																		38.18	1.45404								17.732	0.80469
																																		33.938	1.29249								12.102	0.549197
																																		33.536	1.27718								10.09	0.457891
																																		38.515	1.4668								21.036	0.954627
																																		25.158	0.958116								7.503	0.340491
																																		35.355	1.34646								10.207	0.4632
																																		41.945	1.59743								7.301	0.331324
																																		40.737	1.55143								20.226	0.917869
																																		34.742	1.32311								16.299	0.739659
																																		41.533	1.58174								16.79	0.761941
																																		41.908	1.59602								19.45	0.882654
																																		39.4	1.50051								11.472	0.520607
																																		30.504	1.16171								8.857	0.401936
																																		37.811	1.43999								29.489	1.33823
																																		39.51	1.5047								27.13	1.23118
																																		37.446	1.42609								57.516	2.61011
																																		33.106	1.26081								8.819	0.400212
																																		50.829	1.93577								21.56	0.978407
																																		39.889	1.51913								37.339	1.69447
																																		34.025	1.29581								25.665	1.16469
																																		30.26	1.15242								19.204	0.87149
																																		66.681	2.53948								17.599	0.798654
																																		39.125	1.49003								9.994	0.453534
																																		30.133	1.14758								21.905	0.994063
																																		23.418	0.89185								24.794	1.12517
																																		34.199	1.30243								18.202	0.826018
																																		30.507	1.16183								20.849	0.946141
																																		41.285	1.5723								19.95	0.905344
																																		18.554	0.706609								14.382	0.652664
																																		31.861	1.21339								44.476	2.01835
																																		95.814	3.64897								19.762	0.896812
																																		36.377	1.38538								41.033	1.8621
																																		33.063	1.25917								17.753	0.805643
																																		37.267	1.41927								13.001	0.589994
																																		37.795	1.43938								16.273	0.738479
																																		45.656	1.73876								11.256	0.510805
																																		35.746	1.36135								11.073	0.5025
																																		20.592	0.784224								42.915	1.94751
																																		32.737	1.24675								22.93	1.04058
																																		31.887	1.21438								20.178	0.915691
																																		24.235	0.922964								14.926	0.677351
																																		20.836	0.793517								25.667	1.16478
																																		29.702	1.13117								23.515	1.06713
																																		20.89	0.795574								21.076	0.956442
																																		36.748	1.39951								23.458	1.06454
																																		33.612	1.28008								23.051	1.04607
																																		37.58	1.43119								20.12	0.913059
																																		42.53	1.61971								28.646	1.29997
																																		35.996	1.37087								15.929	0.722868
																																		25.422	0.96817								21.176	0.960981
																																		32.124	1.22341								24.349	1.10497
																																		16.544	0.630061								16.196	0.734985
																																		20.139	0.766972								16.708	0.75822
																																		27.409	1.04384								12.519	0.56812
																																		18.765	0.714645								9.285	0.421359
																																		22.583	0.86005								22.57	1.02424
																																		28.653	1.09122								16.688	0.757312
																																		31.1	1.18441								29.901	1.35693
																																		24.222	0.922469								25.803	1.17096
																																		23.482	0.894287								26.168	1.18752
																																		23.839	0.907883								25.613	1.16233
																																		35.292	1.34406								41.46	1.88148
																																		17.095	0.651045								15.242	0.691692
																																		38.696	1.4737								15.82	0.717922
																																		14.265	0.543267								28.791	1.30655
																																		22.041	0.839408								10.805	0.490338
																																		29.429	1.12077								16.539	0.75055
																																		29.117	1.10889								28.351	1.28659
																																		22.358	0.851481								25.882	1.17454
																																		26.637	1.01444								45.616	2.07008
																																		24.446	0.931								8.236	0.373755
																																		29.225	1.113								42.854	1.94474
																																		24.114	0.918356								23.353	1.05977
																																		32.441	1.23548								18.622	0.845078
																																		28.726	1.094								17.557	0.796748
																																		16.236	0.618331								25.264	1.1465
																																		17.242	0.656643								13.511	0.613138
																																		33.741	1.28499								21.009	0.953402
																																		21.387	0.814501								25.766	1.16928
																																		20.982	0.799077								17.374	0.788443
																																		26.848	1.02248								13.348	0.605741
																																		18.718	0.712855								20.352	0.923587
																																		21.47	0.817662								39.791	1.80574
																																		28.084	1.06955								21.062	0.955807
																																		10.125	0.3856								34.258	1.55465
																																		20.079	0.764687								24.908	1.13034
																																		34.379	1.30929								20.584	0.934115
																																		36.65	1.39578								21.869	0.992429
																																		25.9	0.986374								20.002	0.907704
																																		35.119	1.33747								19.906	0.903347
																																		30.672	1.16811								16.783	0.761623
																																		12.759	0.485913								12.59	0.571342
																																		10.687	0.407003								20.219	0.917551
																																		23.158	0.881948								14.557	0.660606
																																		28.169	1.07279								10.614	0.48167
																																		37.645	1.43367								23.534	1.06799
																																		28.55	1.0873								18.033	0.818349
																																		10.628	0.404756								22.312	1.01253
																																		53.216	2.02667								21.678	0.983762
																																		27.871	1.06144								18.991	0.861824
																																		17.446	0.664412								26.819	1.21706
																																		20.082	0.764802								23.549	1.06867
																																		39.041	1.48684								12.971	0.588632
																																		27.214	1.03642								18.722	0.849616
																																		15.911	0.605954								21.373	0.96992
																																		16.859	0.642057								18.581	0.843218
																																		26.717	1.01749								17.039	0.773241
																																		28.822	1.09766								24.801	1.12549
																																		15.528	0.591367								19.78	0.897629
																																		17.057	0.649598								7.254	0.329191
																																		15.686	0.597385								17.229	0.781863
																																		15.302	0.58276								5.726	0.25985
																																		15.585	0.593538								16.616	0.754045
																																		28.836	1.09819								28.013	1.27125
																																		16.324	0.621682								38.095	1.72878
																																		12.278	0.467595								18.08	0.820482
																																		24.442	0.930848								37.321	1.69365
																																		21.178	0.806542								7.474	0.339175
																																		16.411	0.624996								21.201	0.962115
																																		22.543	0.858526								14.022	0.636327
																																		18.133	0.690576								18.615	0.844761
																																		14.812	0.564099								20.478	0.929305
																																		12.93	0.492425								26.241	1.19083
																																		20.491	0.780378								13.263	0.601883
																																		16.286	0.620235								16.755	0.760353
																																		19.114	0.727936								15.174	0.688606
																																		14.989	0.57084								17.161	0.778777
																																		15.627	0.595138								24.241	1.10007
																																		22.358	0.851481								31.099	1.41129
																																		44.969	1.7126								24.334	1.10429
																																		30.634	1.16666								12.98	0.589041
																																		35.763	1.362								12.869	0.584004
																																		7.604	0.28959								9.593	0.435337
																																		28.969	1.10325								25.995	1.17967
																																		29.087	1.10775								22.697	1.03
																																		28.266	1.07648								33.235	1.50823
																																		34.896	1.32898								27.351	1.24121
																																		60.72	2.31246								24.752	1.12326
																																		15.064	0.573696								16.884	0.766207
																																		30.407	1.15802								14.862	0.674447
																																		23.465	0.89364								21.514	0.976319
																																		15.398	0.586417								32.066	1.45518
																																		18.348	0.698764								15.589	0.707439
																																		46.411	1.76751								7.997	0.362909
																																		19.809	0.754405								25.124	1.14014
																																		25.911	0.986793								21.849	0.991522
																																		27.634	1.05241								21.04	0.954809
																																		27.08	1.03131								17.827	0.809001
																																		45.456	1.73114								9.233	0.418999
																																		37.519	1.42887								61.287	2.78124
																																		29.131	1.10942								11.512	0.522422
																																		37.985	1.44662								13.599	0.617131
																																		35.609	1.35613								9.564	0.43402
																																		46.351	1.76523								41.832	1.89836
																																		27.872	1.06148								14.856	0.674175
																																		26.216	0.998409								14.113	0.640457
																																		33.851	1.28918								32.842	1.49039
																																		41.675	1.58715								16.999	0.771426
																																		14.087	0.536488								34.836	1.58088
																																		34.316	1.30689								18.551	0.841856
																																		24.889	0.947871								14.713	0.667685
																																		23.36	0.889641								44.844	2.03505
																																		25.174	0.958725								42.335	1.92119
																																		36.071	1.37373								103.197	4.68315
																																		15.241	0.580437								64.346	2.92006
																																		23.233	0.884804								16.891	0.766524
																																		29.113	1.10874								108.225	4.91132
																																		73.302	2.79163								42.556	1.93122
																																		26.918	1.02514								37.426	1.69842
																																		39.424	1.50142								41.835	1.8985
																																		31.865	1.21354								23.906	1.08487
																																		19.51	0.743018								41.434	1.8803
																																		17.831	0.679075								19.661	0.892229
																																		23.635	0.900114								53.428	2.4246
																																		52.766	2.00954								29.265	1.32806
																																		17.997	0.685397								5.842	0.265114
																																		35.559	1.35423								12.856	0.583414
																																		13.676	0.520836								8.038	0.36477
																																		33.761	1.28575								9.86	0.447453
																																		31.562	1.20201								6.783	0.307817
																																		27.493	1.04704								23.64	1.0728
																																		45.841	1.74581								40.999	1.86056
																																		20.653	0.786548								27.55	1.25024
																																		22.594	0.860469								51.985	2.35911
																																		10.588	0.403233								31.528	1.43076
																																		24.524	0.933971								16.916	0.767659
																																		33.97	1.29371								36.85	1.67228
																																		24.626	0.937855								11.574	0.525236
																																		27.459	1.04575								13.573	0.615951
																																		29.637	1.12869								28.082	1.27438
																																		29.315	1.11643								28.063	1.27352
																																		26.641	1.01459								8.591	0.389865
																																		30.203	1.15025								30.363	1.37789
																																		32.547	1.23952								30.161	1.36873
																																		33.821	1.28804								28.255	1.28223
																																		26.238	0.999246								10.475	0.475362
																																		24.443	0.930886								88.859	4.03248
																																		30.688	1.16872								24.687	1.12031
																																		27.013	1.02876								19.313	0.876436
																																		37.745	1.43748								35.686	1.61945
																																		25.629	0.976053								22.937	1.0409
																																		33.507	1.27608								21.584	0.979496
																																		24.18	0.92087								25.793	1.1705
																																		36.44	1.38778								19.677	0.892955
																																		29.716	1.1317								17.514	0.794797
																																		30.607	1.16564								16.118	0.731445
																																		23.913	0.910701								22.509	1.02147
																																		53.624	2.04221								9.842	0.446636
																																		21.898	0.833962								13.867	0.629293
																																		32.933	1.25422								28.116	1.27592
																																		40.137	1.52858								20.105	0.912378
																																		37.075	1.41196								20.504	0.930485
																																		24.746	0.942425								14.759	0.669773
																																		37.368	1.42312								18.399	0.834958
																																		24.78	0.94372								21.333	0.968105
																																		17.074	0.650245								39.778	1.80515
																																		38.722	1.47469								11.869	0.538623
																																		39.631	1.5093								26.516	1.20331
																																		25.885	0.985803								24.756	1.12344
																																		24.326	0.92643								19.503	0.885059
																																		36.418	1.38694								22.311	1.01249
																																		23.331	0.888536								16.027	0.727316
																																		30.735	1.17051								20.754	0.94183
																																		17.765	0.676561								19.836	0.90017
																																		24.139	0.919308								20.749	0.941603
																																		40	1.52336								17.635	0.800288
																																		25.542	0.97274								10.55	0.478766
																																		38.343	1.46025								10.288	0.466876
																																		47.177	1.79669								11.876	0.538941
																																		29.669	1.12991								11.147	0.505858
																																		26.563	1.01162								44.928	2.03886
																																		34.818	1.32601								16.164	0.733533
																																		30.523	1.16244								26.854	1.21865
																																		17.361	0.661175								16.814	0.76303
																																		25.503	0.971255								25.117	1.13983
																																		35.399	1.34813								17.983	0.81608
																																		33.47	1.27467								15.612	0.708483
																																		43.208	1.64553								21.068	0.956079
																																		24.23	0.922774								34.598	1.57008
																																		32.402	1.234								20.985	0.952313
																																		24.303	0.925554								8.468	0.384283
																																		30.02	1.14328								28.937	1.31318
																																		31.115	1.18498								14.309	0.649352
																																		63.561	2.42065								22.592	1.02524
																																		16.881	0.642895								17.935	0.813902
																																		28.583	1.08855								15.926	0.722732
																																		41.732	1.58932								24.067	1.09218
																																		31.836	1.21244								35.89	1.62871
																																		20.817	0.792793								23.596	1.0708
																																		20.727	0.789366								13.42	0.609008
																																		28.097	1.07004								18.02	0.817759
																																		26.806	1.02088								12.785	0.580192
																																		20.646	0.786281								13.789	0.625754
																																		38.274	1.45762								72.925	3.30938
																																		31.6	1.20345								25.223	1.14464
																																		35.458	1.35038								19.629	0.890777
																																		27.205	1.03607								25.02	1.13542
																																		28.024	1.06726								17.241	0.782408
																																		25.438	0.968779								20.875	0.947321
																																		26.382	1.00473								17.779	0.806822
																																		22.893	0.871856								11.707	0.531271
																																		28.613	1.0897								58.096	2.63643
																																		19.493	0.74237								22.503	1.0212
																																		15.972	0.608277								22.366	1.01498
																																		20.678	0.7875								42.616	1.93394
																																		19.009	0.723938								94.779	4.30113
																																		22.524	0.857803								26.941	1.2226
																																		28.155	1.07225								13.243	0.600976
																																		30.245	1.15185								53.405	2.42355
																																		28.288	1.07732								44.178	2.00483
																																		33.7	1.28343								17.194	0.780275
																																		25.968	0.988964								23.006	1.04403
																																		17.102	0.651312								14.139	0.641637
																																		32.694	1.24512								18.817	0.853928
																																		30.646	1.16712								46.913	2.12894
																																		37.564	1.43059								52.447	2.38008
																																		22.009	0.838189								18.208	0.826291
																																		20.009	0.762022								28.452	1.29117
																																		25.938	0.987821								29.289	1.32915
																																		7.711	0.293665								21.851	0.991612
																																		40.086	1.52663								25.501	1.15725
																																		29.847	1.13669								26.537	1.20427
																																		39.197	1.49278								35.095	1.59263
																																		55.079	2.09763								30.651	1.39096
																																		43.48	1.65589								25.063	1.13738
																																		45.961	1.75038								43.592	1.97823
																																		23.304	0.887508								9.02	0.409333
																																		27.671	1.05382								19.043	0.864184
																																		26.155	0.996085								17.23	0.781908
																																		36.829	1.40259								20.096	0.911969
																																		25.417	0.96798								19.818	0.899354
																																		53.032	2.01967								17.687	0.802647
																																		58.994	2.24672								20.962	0.951269
																																		25.842	0.984165								16.557	0.751367
																																		30.326	1.15493								40.642	1.84436
																																		42.808	1.6303								23.004	1.04394
																																		42.322	1.61179								29.702	1.3479
																																		36.896	1.40515								20.798	0.943827
																																		27.836	1.0601								11.813	0.536082
																																		38.784	1.47705								21.565	0.978634
																																		39.419	1.50123								86.838	3.94076
																																		38.429	1.46353								37.048	1.68126
																																		37.786	1.43904								25.712	1.16683
																																		39.119	1.48981								22.979	1.0428
																																		29.393	1.1194								21.833	0.990796
																																		30.088	1.14587								18.532	0.840994
																																		33.163	1.26298								21.204	0.962251
																																		27.309	1.04003								18	0.816852
																																		36.94	1.40682								21.914	0.994471
																																		36.283	1.3818								29.039	1.31781
																																		34.231	1.30365								29.612	1.34381
																																		40.778	1.55299								17.794	0.807503
																																		32.519	1.23845								22.32	1.0129
																																		29.523	1.12435								22.938	1.04094
																																		35.429	1.34928								11.086	0.50309
																																		32.978	1.25593								55.836	2.53387
																																		36.977	1.40823								13.094	0.594214
																																		36.925	1.40625								36.889	1.67405
																																		29.46	1.12195								21.369	0.969739
																																		45.013	1.71427								18.194	0.825655
																																		44.168	1.68209								34.403	1.56123
																																		30.878	1.17596								15.399	0.698817
																																		24.203	0.921746								16.551	0.751095
																																		16.39	0.624196								5.429	0.246372
																																		33.579	1.27882								14.339	0.650713
																																		21.606	0.822842								29.486	1.33809
																																		25.137	0.957316								19.468	0.88347
																																		36.411	1.38667								58.385	2.64955
																																		35.943	1.36885								44.6	2.02398
																																		23.793	0.906131								24.781	1.12458
																																		29.751	1.13304								6.853	0.310994
																																		27.099	1.03204								17.242	0.782453
																																		40.458	1.5408
																																		38.57	1.4689
																																		16.242	0.618559
																																		21.127	0.804599
																																		30.177	1.14926
																																		30.584	1.16476
																																		21.208	0.807684
																																		21.895	0.833848
																																		33.621	1.28042
																																		27.414	1.04403
																																		25.697	0.978643
																																		24.856	0.946614
																																		45.141	1.71915
																																		14.289	0.544181
																																		48.532	1.84829
																																		18.239	0.694613
																																		31.936	1.21625
																																		22.338	0.850719
																																		31.703	1.20738
																																		15.473	0.589273
																																		20.678	0.7875
																																		33.073	1.25955
																																		36.757	1.39985
																																		41.603	1.58441
																																		26.527	1.01025
																																		22.853	0.870332
																																		24.991	0.951756
																																		34.784	1.32471
																																		51.343	1.95534
																																		25.136	0.957278
																																		44.194	1.68308
																																		10.661	0.406013
																																		16.565	0.63086
																																		16.133	0.614408
																																		28	1.06635
																																		27.283	1.03904
																																		23.238	0.884995
																																		20.592	0.784224
																																		21.515	0.819376
																																		24.593	0.936598
																																		29.452	1.12165
																																		23.953	0.912225
																																		30.238	1.15158
																																		19.45	0.740733
																																		28.377	1.08071
																																		20.748	0.790166
																																		15.949	0.607401
																																		31.675	1.20631
																																		25.985	0.989611
																																		20.764	0.790775
																																		20.104	0.76564
																																		89.036	3.39084
																																		20.475	0.779769
																																		29.863	1.1373
																																		36.985	1.40853
																																		43.235	1.64656
																																		28.578	1.08836
																																		23.287	0.886861
																																		32.464	1.23636
																																		37.026	1.4101
																																		39.139	1.49057
																																		22.544	0.858564
																																		33.202	1.26446
																																		29.395	1.11948
																																		33.043	1.25841
																																		34.452	1.31207
																																		30.12	1.14709
																																		22.883	0.871475
																																		31	1.1806
																																		28.016	1.06696
																																		153.914	5.86165
																																		40.472	1.54133
																																		21.938	0.835485
																																		183.248	6.97881
																																		28.127	1.07119
																																		17.765	0.676561
																																		15.327	0.583713
																																		32.413	1.23441
																																		39.899	1.51951
																																		28.069	1.06898
																																		35.654	1.35784
																																		40.693	1.54975
																																		26.244	0.999475
																																		57.031	2.17197
																																		17.293	0.658586
																																		26.438	1.00686
																																		24.381	0.928525
																																		24.984	0.951489
																																		53.818	2.0496
																																		36.246	1.38039
																																		138.573	5.27741
																																		21.787	0.829735
																																		19.816	0.754671
																																		27.45	1.0454
																																		31.105	1.1846
																																		22.78	0.867552
																																		29.317	1.11651
																																		18.593	0.708095
																																		47.077	1.79288
																																		47.003	1.79006
																																		16.866	0.642324
																																		17.476	0.665555
																																		13.131	0.50008
																																		23.999	0.913976
																																		27.094	1.03185
																																		29.015	1.10501
																																		17.525	0.667421
																																		21.055	0.801857
																																		12.792	0.48717
																																		15.483	0.589654
																																		17.743	0.675723
																																		16.905	0.643809
																																		26.029	0.991287
																																		19.275	0.734068
																																		20.874	0.794964
																																		22.287	0.848777
																																		19.643	0.748083
																																		35.624	1.3567
																																		25.141	0.957468
																																		32.088	1.22204
																																		40.614	1.54674
																																		46.626	1.7757
																																		25.447	0.969122
																																		48.945	1.86402
																																		41.643	1.58593
																																		21.794	0.830001
																																		38.456	1.46456
																																		27.428	1.04457
																																		19.909	0.758213
																																		150.026	5.71358
																																		21.703	0.826536
																																		16.798	0.639734
																																		25.453	0.969351
																																		33.184	1.26378
																																		13.945	0.531081
																																		14.595	0.555835
																																		41.878	1.59488
																																		26.581	1.01231
																																		15.538	0.591748
																																		26.664	1.01547
																																		24.006	0.914243
																																		26.883	1.02381
																																		21.212	0.807837
																																		24.018	0.9147
																																		19.67	0.749111
																																		14.559	0.554464
																																		23.82	0.907159
																																		25.997	0.990068
																																		30.062	1.14488
																																		20.157	0.767658
																																		24.243	0.923269
																																		16.576	0.631279
																																		19.846	0.755814
																																		22.412	0.853537
																																		15.972	0.608277
																																		25.181	0.958992
																																		25.652	0.976929
																																		14.888	0.566994
																																		26.803	1.02076
																																		19.518	0.743322
																																		24.44	0.930771
																																		25.327	0.964552
																																		23.451	0.893106
																																		15.192	0.578571
																																		17.132	0.652454
																																		21.072	0.802505
																																		16.961	0.645942
																																		21.234	0.808674
																																		20.193	0.769029
																																		19.743	0.751891
																																		23.065	0.878406
																																		24.511	0.933475
																																		23.31	0.887737
																																		18.857	0.718149
																																		15.974	0.608353
																																		13.913	0.529862
																																		26.791	1.02031
																																		23.231	0.884728
																																		23.738	0.904037
																																		16.623	0.633069
																																		29.193	1.11178
																																		18.391	0.700402
																																		15.307	0.582951
																																		23.49	0.894592
																																		16.85	0.641714
																																		21.545	0.820518
																																		14.338	0.546048
																																		28.223	1.07484
																																		10.196	0.388304
																																		19.904	0.758023
																																		20.433	0.778169
																																		30.047	1.14431
																																		21.148	0.805399
																																		34.743	1.32315
																																		21.958	0.836247
																																		13.093	0.498633
																																		21.7	0.826422
																																		18.979	0.722795
																																		19.103	0.727518
																																		19.369	0.737648
																																		11.766	0.448096
																																		24.231	0.922812
																																		21.521	0.819604
																																		18.583	0.707714
																																		32.748	1.24717
																																		35.551	1.35392
																																		18.695	0.711979
																																		24.474	0.932066
																																		24.78	0.94372
																																		24.905	0.948481
																																		17.4	0.662661
																																		14.337	0.546009
																																		19.248	0.73304
																																		47.829	1.82152
																																		27.117	1.03272
																																		31.051	1.18254
																																		21.958	0.836247
																																		41.851	1.59385
																																		16.446	0.626328
																																		23.042	0.87753
																																		21.717	0.827069
																																		23.272	0.886289
																																		27.086	1.03154
																																		31.89	1.2145
																																		20.872	0.794888
																																		22.429	0.854185
																																		33.22	1.26515
																																		32.309	1.23045
																																		29.464	1.12211
																																		29.523	1.12435
																																		26.024	0.991096
																																		25.557	0.973311
																																		27.245	1.0376
																																		29.413	1.12016
																																		20.598	0.784453
																																		22.248	0.847291
																																		23.88	0.909444
																																		16.385	0.624005
																																		26.918	1.02514
																																		18.405	0.700935
																																		26.768	1.01943
																																		18.01	0.685892
																																		34.412	1.31054
																																		19.744	0.751929
																																		22.538	0.858336
																																		11.267	0.429092
																																		16.457	0.626747
																																		22.175	0.844511
																																		24.282	0.924754
																																		34.583	1.31706
																																		21.31	0.811569
																																		46.116	1.75628
																																		54.068	2.05912
																																		17.876	0.680789
																																		35.372	1.34711
																																		38.885	1.48089
																																		61.927	2.35842
																																		29.23	1.11319
																																		64.412	2.45306
																																		43.196	1.64507
																																		66.027	2.51457
																																		33.467	1.27456
																																		16.135	0.614484
																																		39.237	1.4943
																																		24.332	0.926658
																																		31.33	1.19317
																																		29.601	1.12732
																																		20.389	0.776493
																																		57.565	2.1923
																																		37.15	1.41482
																																		44.756	1.70448
																																		41.76	1.59039
																																		28.79	1.09644
																																		41.084	1.56464
																																		35.11	1.33713
																																		35.07	1.3356
																																		39.841	1.5173
																																		26.206	0.998028
																																		32.68	1.24458
																																		32.098	1.22242
																																		34.241	1.30403
																																		29.679	1.13029
																																		16.303	0.620882
																																		24.294	0.925211
																																		26.753	1.01886
																																		27.218	1.03657
																																		25.755	0.980852
																																		28.296	1.07762
																																		25.178	0.958877
																																		45.016	1.71439
																																		25.155	0.958002
																																		13.506	0.514362
																																		23.979	0.913215
																																		37.972	1.44612
																																		33.902	1.29112
																																		30.798	1.17291
																																		50.226	1.9128
																																		43.048	1.63944
																																		34.587	1.31721

## Sheet: F7G
Ectoderm markers in hESCs cultured in YSLC CM for 11 days followed by 4 days in FGF2 (a.u.)
Unit= fluorescence intensity (a.u.)
		Exp 1	4.09034	1			8.7109	2.12963			Exp 2	4.02664	1			5.96144	1.4805			Exp 3	4.38509	1			1.16087	0.26473										Exp 1	59.3923	1			26.7541	0.450464			Exp 2	42.9429	1
		Control	SOX1	rel SOX1		+ YSLC CM	SOX1	rel SOX1			Control	SOX1	rel SOX1		+ YSLC CM	SOX1	rel SOX1			Control	SOX1	rel SOX1		+ YSLC CM	SOX1	rel SOX1					SOX1					Control	SOX2	rel SOX2		+ YSLC CM	SOX2	rel SOX2			Control	SOX2	rel SOX2		+ YSLC CM
			4.755	1.1625			8.294	2.02771				5.543	1.37658			8.827	2.19215				6.868	1.56622			0.085	0.0193839					hESC	+ YSLC CM					67.041	1.12878			27.14	0.456962				47.93	1.11613
			3.884	0.949555			12.36	3.02176				5.211	1.29413			8.786	2.18197				6.27	1.42984			0.366	0.0834646				Number of values	4979	4736					63.773	1.07376			24.738	0.416519				52.225	1.21615
			4.673	1.14245			8.811	2.1541				5.53	1.37335			2.672	0.66358				5.418	1.23555			0.861	0.196347											60.612	1.02054			27.921	0.470112				58.672	1.36628
			3.504	0.856653			11.629	2.84304				5.127	1.27327			2.92	0.72517				9.538	2.1751			0.037	0.00843768				Minimum	0.1019	0.002737					53.362	0.898467			34.548	0.581692				56.262	1.31016
			4.076	0.996495			4.274	1.0449				0.758	0.188246			9.636	2.39306				6.801	1.55094			0.564	0.128618				25% Percentile	0.8538	0.3901					59.026	0.993833			19.089	0.321406				10.181	0.237082
			5.165	1.26273			9.158	2.23894				6.204	1.54074			4.115	1.02194				5.868	1.33817			0.587	0.133863				Median	1.022	1.021					74.187	1.2491			16.827	0.28332				45.634	1.06267
			5.197	1.27056			8.261	2.01964				4.69	1.16474			5.174	1.28494				6.662	1.51924			2.219	0.506033				75% Percentile	1.189	1.809					66.95	1.12725			16.747	0.281973				59.349	1.38204
			5.296	1.29476			5.371	1.31309				1.791	0.444788			2.273	0.56449				7.644	1.74318			0.844	0.19247				Maximum	3.064	12.98					69.443	1.16923			22.352	0.376345				22.469	0.523229
			5.112	1.24977			11.414	2.79048				4.939	1.22658			2.283	0.566974				8.099	1.84694			0.566	0.129074											72.493	1.22058			27.42	0.461676				54.796	1.27602
			0.907	0.221742			6.296	1.53924				5.888	1.46226			2.649	0.657869				6.428	1.46588			0.774	0.176507				Mean	1	1.315					11.324	0.190665			16.58	0.279161				66.439	1.54715
			4.244	1.03757			13.626	3.33127				5.472	1.35895			4.747	1.1789				6.132	1.39837			0.964	0.219836				Std. Deviation	0.3057	1.257					69.125	1.16387			26.484	0.445917				57.87	1.3476
			4.853	1.18645			4.484	1.09624				4.515	1.12128			3.37	0.836926				5.862	1.3368			2.794	0.637159				Std. Error of Mean	0.004333	0.01826					73.302	1.2342			24.823	0.41795				43.383	1.01025
			0.609	0.148887			4.619	1.12925				5.382	1.3366			3.178	0.789244				5.617	1.28093			0.53	0.120864											10.515	0.177043			23.227	0.391078				66.138	1.54014
			4.409	1.07791			12.777	3.1237				5.388	1.33809			2.43	0.603481				6	1.36827			3.267	0.745024				Lower 95% CI of mean	0.9915	1.279					67.154	1.13069			24.809	0.417714				60.467	1.40808
			4.03	0.985249			15.803	3.8635				4.936	1.22584			4.341	1.07807				5.169	1.17877			0.726	0.165561				Upper 95% CI of mean	1.008	1.351					62.12	1.04593			27.331	0.460178				56.569	1.31731
			4.788	1.17056			20.036	4.89837				5.207	1.29314			3.278	0.814078				5.666	1.29211			1.057	0.241044											73.737	1.24153			34.475	0.580463				55.644	1.29577
			4.269	1.04368			13.738	3.35865				4.59	1.13991			3.888	0.965569				6.973	1.59016			0.507	0.115619				Sum	4979	6228					66.217	1.11491			24.759	0.416873				43.752	1.01884
			4.454	1.08891			12.451	3.044				5.33	1.32368			3.863	0.959361				5.934	1.35322			1.056	0.240816											65.878	1.1092			28.269	0.475971				55.839	1.30031
			3.763	0.919973			7.494	1.83212				3.614	0.897522			2.273	0.56449				5.734	1.30761			0.682	0.155527				D'Agostino & Pearson normality test							53.551	0.901649			31.76	0.53475				44.393	1.03377
			4.446	1.08695			5.121	1.25198				6.342	1.57501			2.972	0.738084				6.497	1.48161			0.715	0.163052				K2	269.7	2590					70.147	1.18108			19.456	0.327585				79.347	1.84773
			4.955	1.21139			6.167	1.5077				5.128	1.27352			2.831	0.703067				4.696	1.0709			0.653	0.148914				P value	<0.0001	<0.0001					64.846	1.09183			22.77	0.383383				48.458	1.12843
			3.833	0.937087			6.168	1.50794				1.075	0.266972			3.326	0.825999				5.306	1.21001			0.604	0.137739				Passed normality test (alpha=0.05)?	No	No					49.165	0.827801			22.515	0.37909				15.722	0.366114
			0.587	0.143509			7.239	1.76978				5.915	1.46897			1.766	0.438579				6.038	1.37694			0.756	0.172402				P value summary	****	****					16.232	0.273302			26.442	0.44521				60.498	1.4088
			4.869	1.19037			4.344	1.06202				6.057	1.50423			4.397	1.09198				3.225	0.735446			0.05	0.0114023											74.216	1.24959			23.119	0.389259				70.887	1.65073
			4.076	0.996495			12.787	3.12615				5.405	1.34231			7.588	1.88445				4.966	1.13247			0.53	0.120864											63.96	1.07691			19.34	0.325632				57.17	1.3313
			2.455	0.600195			6.672	1.63116				5.67	1.40812			2.781	0.69065				6.733	1.53543			1.036	0.236255											45.17	0.760537			23.206	0.390724				66.455	1.54752
			4.493	1.09844			17.798	4.35123				5.102	1.26706			1.886	0.468381				4.85	1.10602			0.737	0.168069				Mann Whitney test							58.848	0.990836			25.995	0.437683				61.203	1.42522
			4.468	1.09233			7.454	1.82234				4.425	1.09893			3.12	0.774839				5.407	1.23304			2.28	0.519943				P value	0.0181						65.417	1.10144			30.547	0.514326				43.52	1.01344
			3.644	0.89088			25.766	6.29924				4.953	1.23006			1.728	0.429142				5.439	1.24034			3.428	0.78174				Exact or approximate P value?	Approximate						57.739	0.972164			15.073	0.253787				40.277	0.937919
			5.742	1.4038			21.793	5.32792				6.103	1.51566			2.718	0.675004				5.7	1.29986			0.755	0.172174				P value summary	*						90.968	1.53165			21.053	0.354474				64.903	1.51138
			4.418	1.08011			11.574	2.8296				5.146	1.27799			3.185	0.790982				4.771	1.088			0.6	0.136827				Significantly different (P < 0.05)?	Yes						68.744	1.15746			23.944	0.40315				49.763	1.15882
			5.168	1.26347			1.801	0.440306				5.124	1.27252			3.487	0.865982				5.204	1.18675			0.234	0.0533626				One- or two-tailed P value?	Two-tailed						77.609	1.30672			11.478	0.193258				63.714	1.48369
			5.967	1.4588			12.704	3.10586				6.273	1.55787			6.538	1.62369				5.415	1.23487			1.201	0.273882				Sum of ranks in column A,B	23861508 , 23333962						73.75	1.24174			24.289	0.408959				74.537	1.73572
			4.19	1.02437			31.93	7.8062				3.515	0.872936			1.964	0.487752				5.264	1.20043			0.725	0.165333				Mann-Whitney U	11463798						67.225	1.13188			28.628	0.482016				48.386	1.12675
			1.306	0.319289			6.28	1.53533				4.576	1.13643			12.644	3.14009				6.026	1.3742			1.332	0.303756											27.093	0.456171			22.184	0.373517				43.842	1.02094
			4.296	1.05028			1.65	0.40339				3.523	0.874923			3.657	0.908201				4.885	1.114			2.651	0.604548				Difference between medians							62.955	1.05999			12.562	0.211509				50.524	1.17654
			4.897	1.19721			7.203	1.76098				1.307	0.324588			1.906	0.473347				6.685	1.52448			0.339	0.0773074				Median of column A	1.022, n=4979						67.516	1.13678			24.605	0.41428				16.947	0.39464
			4.164	1.01801			13.977	3.41708				5.777	1.43469			5.846	1.45183				5.241	1.19519			0.801	0.182664				Median of column B	1.021, n=4736						59.201	0.99678			32.109	0.540626				68.633	1.59824
			4.651	1.13707			11.826	2.8912				4.758	1.18163			1.517	0.376741				5.163	1.1774			1.335	0.304441				Difference: Actual	-0.0006266						73.25	1.23333			21.707	0.365485				53.208	1.23904
			4.368	1.06788			5.349	1.30772				4.305	1.06913			1.443	0.358363				5.292	1.20682			3.476	0.792686				Difference: Hodges-Lehmann	0.03423						70.346	1.18443			20.873	0.351443				53.437	1.24437
			5.178	1.26591			7.161	1.75071				5.88	1.46027			3.414	0.847853				5.357	1.22164			3.428	0.78174											86.286	1.45282			30.221	0.508837				70.585	1.64369
			0.532	0.130063			11.262	2.75332				5.81	1.44289			4.682	1.16276				4.922	1.12244			0.67	0.15279											11.072	0.186422			25.884	0.435814				67.925	1.58175
			4.551	1.11262			5.621	1.37421				4.81	1.19454			3.837	0.952904				5.613	1.28002			0.794	0.181068											61.62	1.03751			21.341	0.359323				58.379	1.35946
			4.638	1.13389			4.623	1.13022				5.452	1.35398			1.262	0.313413				5.635	1.28504			0.644	0.146861											66.183	1.11434			28.697	0.483177				54.413	1.2671
			4.39	1.07326			5.694	1.39206				6.171	1.53254			2.966	0.736594				5.702	1.30031			0.676	0.154159											70.398	1.18531			32.546	0.547984				63.497	1.47864
			4.203	1.02754			8.709	2.12916				4.831	1.19976			3.423	0.850088				5.252	1.19769			0.777	0.177191											71.946	1.21137			25.541	0.430039				57.753	1.34488
			4.086	0.99894			4.702	1.14954				5.426	1.34753			3.563	0.884857				6.142	1.40065			1.03	0.234887											57.619	0.970143			28.751	0.484087				65.101	1.51599
			4.379	1.07057			5.996	1.46589				5.799	1.44016			3.032	0.752985				4.887	1.11446			0.868	0.197943											57.491	0.967988			21.908	0.36887				58.594	1.36446
			4.122	1.00774			11.187	2.73498				6.304	1.56557			2.035	0.505384				6.493	1.4807			2.344	0.534538											60.052	1.01111			19.028	0.320378				61.49	1.4319
			4	0.977915			12.491	3.05378				3.909	0.970784			2.112	0.524507				4.866	1.10967			0.754	0.171946											62.703	1.05574			20.013	0.336963				55.011	1.28103
			4.901	1.19819			6.319	1.54486				5.855	1.45407			4.075	1.01201				4.82	1.09918			0.964	0.219836											76.137	1.28193			22.664	0.381599				63.662	1.48248
			0.814	0.199006			12.723	3.1105				4.408	1.09471			4.922	1.22236				5.102	1.16349			3.222	0.734762											12.978	0.218513			21.034	0.354154				62.174	1.44783
			4.78	1.16861			9.003	2.20104				1.316	0.326823			3.65	0.906463				4.993	1.13863			0.79	0.180156											69.591	1.17172			28.444	0.478918				18.503	0.430874
			4.551	1.11262			5.632	1.3769				5.393	1.33933			3.17	0.787257				5.021	1.14502			1.282	0.292354											64.577	1.0873			20.79	0.350046				68.029	1.58417
			5.111	1.24953			6.172	1.50892				5.996	1.48908			1.514	0.375996				5.79	1.32038			1.059	0.2415											79.389	1.33669			24.473	0.412057				51.335	1.19542
			3.979	0.97278			8.001	1.95607				5.71	1.41806			2.292	0.569209				6.757	1.5409			0.112	0.0255411											76.8	1.2931			25.43	0.42817				63.941	1.48898
			0.886	0.216608			8.33	2.03651				6.62	1.64405			7.293	1.81119				5.344	1.21867			0.794	0.181068											11.403	0.191995			22.49	0.378669				62.137	1.44697
			0.654	0.159889			4.477	1.09453				5.422	1.34653			9.983	2.47924				4.521	1.03099			1.38	0.314703											20.144	0.339169			27.638	0.465347				71.267	1.65957
			5.02	1.22728			5.578	1.3637				4.74	1.17716			0.95	0.235929				6.59	1.50282			0.657	0.149826											83.809	1.41111			32.084	0.540205				58.371	1.35927
			3.994	0.976448			7.45	1.82137				5.211	1.29413			1.291	0.320615				6.691	1.52585			2.317	0.528381											58.395	0.983209			20.565	0.346257				55.006	1.28091
			4.05	0.990138			4.72	1.15394				5.533	1.3741			0.399	0.0990901				4.877	1.11218			1.696	0.386765											67.579	1.13784			28.948	0.487404				59.524	1.38612
			0.642	0.156955			7.371	1.80205				5.515	1.36963			6.3	1.56458				5.058	1.15345			1.11	0.25313											13.339	0.224592			24.605	0.41428				72.763	1.69441
			3.237	0.791377			7.758	1.89667				6.036	1.49902			2.938	0.729641				5.51	1.25653			0.673	0.153475											49.66	0.836136			24.066	0.405204				61.771	1.43844
			3.793	0.927307			7.987	1.95265				5.096	1.26557			3.272	0.812588				4.691	1.06976			1.226	0.279584											57.883	0.974588			23.768	0.400187				55.799	1.29938
			3.854	0.942221			15.289	3.73783				6.591	1.63685			7.462	1.85316				4.694	1.07044			0.563	0.12839											49.669	0.836287			31.106	0.523738				66.891	1.55767
			4.492	1.0982			9.964	2.43599				5.089	1.26383			3.283	0.81532				5.517	1.25813			0.939	0.214135											72.203	1.2157			22.287	0.375251				48.604	1.13183
			5.653	1.38204			5.204	1.27227				3.768	0.935768			0.662	0.164405				4.33	0.987436			0.136	0.0310142											88.376	1.48801			18.178	0.306067				58.534	1.36306
			0.863	0.210985			6.122	1.4967				5.46	1.35597			0.539	0.133858				5.623	1.2823			1.432	0.326561											19.085	0.321338			19.938	0.3357				72.802	1.69532
			4.072	0.995517			5.597	1.36835				5.677	1.40986			2.077	0.515815				4.547	1.03692			1.15	0.262252											82.441	1.38808			23.443	0.394715				83.251	1.93864
			3.997	0.977181			8.747	2.13845				6.758	1.67832			5.058	1.25613				5.847	1.33338			1.394	0.317895											61.334	1.03269			24.8	0.417563				67.207	1.56503
			4.208	1.02877			7.512	1.83652				6.145	1.52609			2.674	0.664077				4.722	1.07683			0.965	0.220064											77.241	1.30052			24.077	0.40539				75.023	1.74704
			0.895	0.218808			5.214	1.27471				5.765	1.43171			2.444	0.606958				5.277	1.2034			1.411	0.321772											10.169	0.171218			23.919	0.402729				89.981	2.09536
			3.38	0.826338			9.633	2.35506				0.695	0.1726			1.724	0.428148				6.008	1.3701			0.123	0.0280496											63.636	1.07145			26.378	0.444132				13.71	0.319261
			3.431	0.838806			10.55	2.57925				5.836	1.44935			3.934	0.976993				5.648	1.288			1.718	0.391782											52.198	0.878869			23.603	0.397409				70.483	1.64132
			4.279	1.04612			4.375	1.06959				2.827	0.702074			5.412	1.34405				4.815	1.09804			0.615	0.140248											68.539	1.15401			21.523	0.362387				30.523	0.71078
			4.552	1.11287			2.448	0.598484				4.626	1.14885			2.158	0.535931				8.897	2.02892			1.23	0.280496											85.592	1.44113			22.871	0.385084				49.437	1.15123
			4.577	1.11898			11.991	2.93154				6.133	1.52311			6.736	1.67286				5.078	1.15801			0.19	0.0433286											77.812	1.31014			25.417	0.427951				82.298	1.91645
			3.867	0.945399			8.738	2.13625				6.427	1.59612			2.475	0.614656				5.048	1.15117			0.791	0.180384											57.411	0.966641			24.661	0.415222				63.6	1.48104
			4.119	1.00701			13.155	3.21612				5.205	1.29264			4.375	1.08651				4.805	1.09576			0.053	0.0120864											68.986	1.16153			29.64	0.499055				55.826	1.3
			3.5	0.855675			7.242	1.77051				6.736	1.67286			2.189	0.543629				4.846	1.10511			0.497	0.113339											58.069	0.97772			23.259	0.391617				112.448	2.61854
			4.478	1.09478			2.317	0.566457				5.938	1.47468			4.066	1.00977				5.614	1.28025			0.736	0.167841											60.65	1.02118			23.673	0.398587				77.092	1.79522
			4.69	1.1466			7.189	1.75756				5.339	1.32592			2.376	0.59007				5.076	1.15756			1.255	0.286197											68.248	1.14911			23.513	0.395893				54.205	1.26226
			4.537	1.1092			6.056	1.48056				5.488	1.36292			4.089	1.01549				5.155	1.17557			0.805	0.183577											80.793	1.36033			22.944	0.386313				55.406	1.29022
			0.751	0.183603			3.725	0.910683				6.038	1.49951			2.899	0.719955				6.15	1.40248			0.802	0.182892											16.595	0.279414			14.909	0.251026				72.745	1.69399
			4.463	1.09111			10.057	2.45872				5.23	1.29885			6.866	1.70514				4.949	1.1286			1.271	0.289846											72.891	1.22728			28.936	0.487202				67.019	1.56065
			3.995	0.976692			6.993	1.70964				5.71	1.41806			1.947	0.48353				6.117	1.39495			0.645	0.147089											61.893	1.04211			24.272	0.408673				77.426	1.803
			3.18	0.777442			0.496	0.121261				4.522	1.12302			0.533	0.132368				6.424	1.46496			0.757	0.17263											54.119	0.911213			2.011	0.0338596				48.992	1.14086
			3.697	0.903838			3.873	0.946866				6.01	1.49256			1.455	0.361343				5.672	1.29347			0.979	0.223256											49.211	0.828576			22.464	0.378231				73.573	1.71327
			3.996	0.976937			10.188	2.49075				5.101	1.26681			0.546	0.135597				5.902	1.34592			0.863	0.196803											75.746	1.27535			15.871	0.267223				78.691	1.83245
			4.837	1.18254			4.194	1.02534				5.778	1.43494			3.396	0.843383				4.757	1.08481			0.889	0.202732											81.001	1.36383			23.357	0.393267				77.018	1.7935
			3.92	0.958356			5.315	1.2994				6.111	1.51764			2.382	0.59156				6.526	1.48822			1.042	0.237623											64.548	1.08681			21.508	0.362135				74.66	1.73859
			4.525	1.10627			8.145	1.99128				6.302	1.56508			5.512	1.36888				7.163	1.63349			0.97	0.221204											75.377	1.26914			23.698	0.399008				71.166	1.65722
			4.606	1.12607			6.96	1.70157				2.075	0.515318			0.66	0.163908				6.196	1.41297			0.915	0.208662											74.562	1.25542			29.31	0.493499				33.862	0.788535
			3.674	0.898215			7.303	1.78543				2.496	0.619872			2.208	0.548348				6.121	1.39587			1.03	0.234887											55.265	0.930508			25.029	0.421419				52.604	1.22497
			3.348	0.818514			11.559	2.82593				5.866	1.4568			6.152	1.52782				6.656	1.51787			0.958	0.218467											56.957	0.958997			20.406	0.34358				72.861	1.69669
			3.316	0.810691			7.794	1.90547				6.19	1.53726			2.328	0.578149				7.282	1.66063			0.815	0.185857											57.849	0.974016			28.841	0.485602				88.495	2.06076
			2.845	0.695542			11.539	2.82104				5.64	1.40067			3.223	0.800419				6.204	1.41479			1.332	0.303756											52.862	0.890049			20.128	0.338899				76.989	1.79282
			4.044	0.988672			4.475	1.09404				4.853	1.20522			2.617	0.649921				5.764	1.31445			0.096	0.0218924											74.663	1.25712			21.945	0.369493				54.067	1.25904
			4.273	1.04466			9.669	2.36386				5.911	1.46797			5.407	1.34281				6.294	1.43532			1.71	0.389958											72.733	1.22462			18.535	0.312078				70.248	1.63585
			2.912	0.711922			15.643	3.82438				5.791	1.43817			1.626	0.403811				6.998	1.59586			1.014	0.231238											41.727	0.702566			16.006	0.269496				76.108	1.77231
			3.523	0.861298			17.116	4.1845				6.874	1.70713			10.409	2.58503				5.968	1.36097			1.077	0.245605											47.845	0.805576			20.606	0.346948				69.827	1.62604
			3.401	0.831472			8.971	2.19322				6.111	1.51764			1.637	0.406542				5.889	1.34296			1.308	0.298283											62.691	1.05554			22.212	0.373988				83.006	1.93294
			4.433	1.08377			8.373	2.04702				5.05	1.25415			3.422	0.84984				7.677	1.7507			0.989	0.225537											64.305	1.08272			26.304	0.442886				46.789	1.08956
			2.156	0.527096			4.127	1.00896				5.494	1.36441			2.775	0.68916				8.836	2.01501			0.371	0.0846048											42.766	0.72006			19.124	0.321995				70.752	1.64758
			3.74	0.91435			21.211	5.18564				3.767	0.935519			3.564	0.885105				7.451	1.69917			1.275	0.290758											63.557	1.07012			15.103	0.254292				58.629	1.36528
			3.65	0.892347			5.869	1.43485				2.778	0.689905			2.5	0.620865				8.732	1.99129			0.74	0.168754											57.31	0.964941			21.246	0.357723				41.855	0.974665
			4.092	1.00041			6.633	1.62163				4.127	1.02492			1.365	0.338992				7.611	1.73565			1.246	0.284145											69.327	1.16727			20.005	0.336828				49.856	1.16098
			4.06	0.992583			11.784	2.88094				2.01	0.499175			8.489	2.10821				6.45	1.47089			0.873	0.199084											56.633	0.953542			20.739	0.349187				21.702	0.505368
			4.424	1.08157			9.966	2.43647				5.534	1.37435			3.036	0.753978				7.029	1.60293			0.028	0.00638527											80.33	1.35253			21.574	0.363246				67.207	1.56503
			3.162	0.773041			11.171	2.73107				4.663	1.15804			4.803	1.19281				6.147	1.40179			1.681	0.383344											59.736	1.00579			24.153	0.406669				48.955	1.14
			4.301	1.0515			4	0.977915				5.653	1.4039			4.827	1.19877				5.433	1.23897			1.182	0.26955											60.097	1.01187			23.003	0.387306				79.493	1.85113
			5.103	1.24757			7.498	1.8331				5.386	1.33759			2.352	0.58411				2.421	0.552098			1.049	0.23922											90.223	1.5191			26.254	0.442044				78.615	1.83069
			4.936	1.20675			5.242	1.28156				0.605	0.150249			1.993	0.494954				3.152	0.718799			1.172	0.267269											90.434	1.52266			29.741	0.500755				17.775	0.413921
			5.054	1.2356			5.589	1.36639				1.188	0.295035			5.096	1.26557				2.748	0.626669			1.127	0.257007											73.233	1.23304			23.65	0.3982				23.897	0.556483
			3.372	0.824382			7.209	1.76245				4.848	1.20398			2.328	0.578149				2.948	0.672278			0.706	0.161											71.446	1.20295			23.929	0.402898				57.403	1.33673
			3.876	0.947599			9.393	2.29639				5.108	1.26855			4.742	1.17766				3.135	0.714922			1.302	0.296915											58.895	0.991628			24.853	0.418455				57.351	1.33552
			3.56	0.870344			9.067	2.21669				4.95	1.22931			9.157	2.2741				2.637	0.601356			1.108	0.252674											60.771	1.02321			20.392	0.343344				46.867	1.09138
			3.737	0.913617			6.561	1.60402				5.424	1.34703			3.02	0.750005				2.588	0.590181			0.609	0.13888											71.029	1.19593			22.892	0.385437				53.528	1.24649
			4.381	1.07106			3.303	0.807513				3.316	0.823515			2.77	0.687918				2.245	0.511962			1.405	0.320404											86.755	1.46071			26.083	0.439165				45.01	1.04814
			3.977	0.972292			8.874	2.1695				4.433	1.10092			3.893	0.966811				2.433	0.554834			1.309	0.298511											77.196	1.29977			20.58	0.34651				54.782	1.27569
			3.133	0.765952			5.781	1.41333				5.252	1.30431			3.013	0.748266				2.57	0.586077			0.926	0.21117											51.327	0.864204			22.641	0.381211				56.151	1.30757
			3.963	0.968869			6.291	1.53802				4.768	1.18411			4.447	1.10439				3.224	0.735218			0.78	0.177875											70.252	1.18285			28.227	0.475264				59.279	1.38041
			4.647	1.13609			11.049	2.70124				5.266	1.30779			2.634	0.654143				3.383	0.771477			1.245	0.283916											69.757	1.17451			21.985	0.370166				47.388	1.10351
			3.264	0.797978			6.67	1.63067				4.245	1.05423			9.493	2.35755				2.725	0.621424			1.036	0.236255											54.666	0.920423			24.36	0.410154				41.635	0.969542
			4.92	1.20283			11.246	2.74941				4.908	1.21888			3.748	0.930801				3.066	0.699187			1.262	0.287793											94.843	1.59689			24.115	0.406029				55.528	1.29306
			3.26	0.797			14.676	3.58797				6.749	1.67609			10.386	2.57932				3.042	0.693714			0.078	0.0177875											56.374	0.949181			24.106	0.405878				50.414	1.17398
			4.091	1.00016			9.892	2.41838				4.315	1.07161			2.038	0.506129				2.764	0.630317			1.074	0.244921											83.474	1.40547			17.678	0.297648				52.86	1.23094
			4.716	1.15296			4.078	0.996984				5.636	1.39968			3.333	0.827737				2.841	0.647877			0.765	0.174455											81.773	1.37683			21.092	0.35513				53.17	1.23815
			3.882	0.949066			8.972	2.19346				4.991	1.23949			4.537	1.12675				2.631	0.599987			0.591	0.134775											69.078	1.16308			19.779	0.333023				53.356	1.24249
			4.297	1.05052			7.211	1.76294				4.228	1.05001			8.056	2.00068				2.446	0.557799			1.363	0.310826											76.501	1.28806			26.382	0.444199				46.933	1.09292
			4.152	1.01508			10.81	2.64281				3.06	0.759939			10.501	2.60788				2.476	0.56464			0.901	0.205469											76.056	1.28057			18.689	0.314671				28.154	0.655614
			4.809	1.1757			10.485	2.56336				5.686	1.4121			10.582	2.628				2.296	0.523592			0.796	0.181524											65.312	1.09967			18.606	0.313273				63.117	1.46979
			4.39	1.07326			8.515	2.08174				4.782	1.18759			6.778	1.68329				3.106	0.708309			1.13	0.257691											66.077	1.11255			17.667	0.297463				51.691	1.20371
			4.293	1.04955			9.24	2.25898				0.659	0.16366			4.278	1.06242				3.028	0.690521			3.188	0.727009											69.517	1.17047			22.354	0.376379				6.649	0.154833
			4.168	1.01899			5.46	1.33485				5.369	1.33337			4.234	1.0515				3.486	0.794966			0.956	0.218011											51.941	0.874542			15.057	0.253518				47.264	1.10062
			4.532	1.10798			7.043	1.72186				4.819	1.19678			4.976	1.23577				1.949	0.44446			0.307	0.0700099											70.259	1.18297			23.608	0.397493				45.806	1.06667
			3.782	0.924618			4.432	1.08353				4.434	1.10117			5.987	1.48685				2.662	0.607057			1.184	0.270006											55.688	0.937631			19.7	0.331693				53.308	1.24137
			3.681	0.899926			9.867	2.41227				4.671	1.16002			3.705	0.920122				2.924	0.666805			1.22	0.278215											57.75	0.972349			24.81	0.417731				44.555	1.03754
			4.688	1.14612			5.651	1.38155				4.717	1.17145			6.377	1.5837				2.986	0.680943			0.957	0.218239											85.129	1.43333			26.213	0.441354				47.095	1.09669
			4.041	0.987938			4.219	1.03146				4.626	1.14885			3.459	0.859029				2.315	0.527925			1.151	0.26248											71.87	1.21009			21.157	0.356225				49.101	1.1434
			5.663	1.38448			1.102	0.269415				4.387	1.08949			2.804	0.696362				2.207	0.503296			0.954	0.217555											101.446	1.70807			4.848	0.0816268				41.179	0.958924
			4.07	0.995028			4.49	1.09771				5.524	1.37186			1.379	0.342469				3.313	0.755514			1.141	0.2602											60.899	1.02537			22.198	0.373752				59.998	1.39716
			3.639	0.889658			5.756	1.40722				4.595	1.14115			2.88	0.715236				2.857	0.651526			1.324	0.301932											65.565	1.10393			21.319	0.358953				51.611	1.20185
			6.023	1.47249			15.766	3.85445				0.876	0.217551			5.042	1.25216				2.384	0.54366			1.219	0.277987											68.855	1.15933			16.116	0.271348				9.339	0.217475
			4.1	1.00236			8.164	1.99592				3.999	0.993136			0.441	0.109521				2.766	0.630773			0.888	0.202504											67.749	1.1407			24.752	0.416755				42.019	0.978485
			4.132	1.01019			6.673	1.63141				4.94	1.22683			7.371	1.83056				2.727	0.62188			1.49	0.339788											70.693	1.19027			28.45	0.479019				53.63	1.24887
			5.592	1.36712			4.147	1.01385				4.489	1.11483			6.471	1.60705				2.574	0.586989			1.04	0.237167											88.58	1.49144			21.976	0.370015				43.432	1.01139
			4.541	1.11018			7.017	1.71551				4.966	1.23329			4.794	1.19057				2.477	0.564868			1.033	0.235571											63.144	1.06317			26.433	0.445058				53.07	1.23583
			4.235	1.03537			9.067	2.21669				4.164	1.03411			6.208	1.54173				2.427	0.553466			1.059	0.2415											73.009	1.22927			24.04	0.404767				42.868	0.998255
			4.663	1.14			6.74	1.64779				5.601	1.39099			7.821	1.94231				3.587	0.817999			1.339	0.305353											74.421	1.25304			28.114	0.473361				66.406	1.54638
			4.984	1.21848			14.885	3.63906				5.054	1.25514			9.235	2.29348				3.214	0.732938			1.495	0.340928											65.964	1.11065			23.073	0.388485				50.886	1.18497
			4.562	1.11531			7.789	1.90424				5.611	1.39347			6.37	1.58196				2.274	0.518575			1.498	0.341612											81.973	1.3802			27.251	0.458831				62.262	1.44988
			5.089	1.24415			5.324	1.3016				5.123	1.27228			4.557	1.13171				2.104	0.479807			0.115	0.0262252											75.455	1.27045			36.348	0.611999				66.936	1.55872
			3.211	0.785021			9.834	2.4042				4.517	1.12178			3.792	0.941728				3.191	0.727693			1.85	0.421884											58.824	0.990432			21.473	0.361545				48.587	1.13143
			5.222	1.27667			6.279	1.53508				4.917	1.22112			5.562	1.3813				3.028	0.690521			2.601	0.593146											59.79	1.0067			19.618	0.330312				54.868	1.2777
			4.298	1.05077			5.752	1.40624				5.541	1.37609			6.512	1.61723				2.932	0.668629			1.459	0.332718											70.494	1.18692			31.691	0.533588				51.943	1.20958
			4.532	1.10798			3.675	0.898459				4.883	1.21267			13.873	3.4453				2.708	0.617547			1.474	0.336139											71.498	1.20383			26.937	0.453544				54.548	1.27024
			4.051	0.990383			7.461	1.82406				4.405	1.09396			2.722	0.675998				2.552	0.581972			2.286	0.521312											73.597	1.23917			21.363	0.359693				46.87	1.09145
			3.992	0.975959			13.291	3.24937				4.764	1.18312			3.742	0.929311				3.293	0.750953			1.079	0.246061											68.764	1.15779			27.479	0.46267				59.914	1.3952
			4.112	1.0053			14.35	3.50827				5.228	1.29835			7.963	1.97758				2.033	0.463616			2.125	0.484596											59.975	1.00981			27.593	0.464589				58.198	1.35524
			4.943	1.20846			8.545	2.08907				5.647	1.40241			5.897	1.4645				2.212	0.504436			3.637	0.829401											90.975	1.53177			16.486	0.277578				46.474	1.08223
			6.013	1.47005			8.232	2.01255				5.368	1.33312			13.175	3.27196				2.946	0.671822			2.601	0.593146											88.437	1.48903			23.525	0.396095				59.073	1.37562
			0.92	0.22492			5.951	1.45489				4.893	1.21516			3.999	0.993136				2.509	0.572166			0.333	0.0759391											8.186	0.137829			23.508	0.395809				45.142	1.05121
			3.984	0.974003			6.195	1.51455				4.868	1.20895			4.659	1.15704				3.02	0.688697			2.573	0.586761											60.064	1.01131			21.036	0.354188				59.175	1.37799
			3.555	0.869122			6.633	1.62163				0.963	0.239157			2.303	0.571941				3.251	0.741375			4.162	0.949125											45.548	0.766901			27.763	0.467451				11.171	0.260136
			4.688	1.14612			16.456	4.02314				5.658	1.40514			7.04	1.74836				3.693	0.842172			0.553	0.126109											80.031	1.3475			17.159	0.28891				65.317	1.52102
			4.89	1.1955			5.742	1.4038				5.286	1.31276			2.125	0.527735				3.168	0.722448			0.093	0.0212082											57.449	0.967281			16.141	0.271769				51.495	1.19915
			4.45	1.08793			4.585	1.12093				5.625	1.39695			0.401	0.0995867				2.937	0.669769			1.325	0.30216											86.235	1.45196			22.905	0.385656				62.247	1.44953
			5.73	1.40086			7.634	1.86635				4.902	1.21739			19.151	4.75607				4.172	0.951405			2.805	0.639667											88.546	1.49087			20.981	0.353262				43.169	1.00526
			4.969	1.21481			11.924	2.91516				5.005	1.24297			4.329	1.07509				4.438	1.01207			3.37	0.768513											77.698	1.30822			19.467	0.32777				54.581	1.27101
			4.649	1.13658			2.965	0.724879				6.512	1.61723			5.245	1.30257				3.149	0.718115			2.135	0.486877											72.151	1.21482			20.825	0.350635				68.602	1.59752
			3.715	0.908238			3.787	0.925841				5.07	1.25911			3.698	0.918383				2.43	0.55415			2.109	0.480948											59.463	1.00119			19.25	0.324116				52.879	1.23138
			5.65	1.3813			6.558	1.60329				5.298	1.31574			5.719	1.42029				3.705	0.844908			1.433	0.326789											67.6	1.1382			10.847	0.182633				59.898	1.39483
			2.275	0.556189			3.181	0.777687				5.304	1.31723			2.58	0.640733				3.837	0.87501			0.059	0.0134547											42.267	0.711658			21.481	0.36168				51.844	1.20728
			4.105	1.00358			8.109	1.98248				4.833	1.20026			18.068	4.48712				3.284	0.748901			2.699	0.615494											84.76	1.42712			22.229	0.374274				54.359	1.26584
			4.593	1.12289			5.339	1.30527				7.137	1.77245			6.186	1.53627				3.094	0.705572			2.743	0.625528											85.098	1.43281			21.788	0.366849				60.107	1.39969
			3.17	0.774997			10.3	2.51813				7.209	1.79033			2.578	0.640236				3.968	0.904884			1.992	0.454266											48.813	0.821875			19.579	0.329656				49.644	1.15605
			3.546	0.866921			8.764	2.14261				5.647	1.40241			2.846	0.706793				2.452	0.559167			1.974	0.450162											69.282	1.16652			22.925	0.385993				69.501	1.61845
			4.771	1.16641			4.714	1.15247				5.622	1.3962			4.433	1.10092				2.919	0.665664			2.222	0.506717											85.77	1.44413			17.641	0.297025				51.549	1.20041
			4.531	1.10773			12.601	3.08068				6.662	1.65448			9.917	2.46285				4.706	1.07318			2.279	0.519715											94.12	1.58472			22.865	0.384983				70.396	1.63929
			4.588	1.12167			7.931	1.93896				4.643	1.15307			7.649	1.8996				3.219	0.734078			3.244	0.739779											68.624	1.15544			20.635	0.347436				60.579	1.41069
			3.735	0.913128			12.618	3.08483				0.804	0.19967			3.024	0.750998				4.265	0.972613			1.69	0.385397											66.38	1.11765			22.59	0.380353				10.488	0.244231
			4.213	1.02999			10.273	2.51153				4.928	1.22385			7.553	1.87576				2.624	0.598391			3.951	0.901007											73.046	1.22989			26.407	0.44462				61.447	1.4309
			4.258	1.04099			6.945	1.6979				4.766	1.18362			2.484	0.616891				5.47	1.24741			2.698	0.615266											80.645	1.35784			19.505	0.32841				48.276	1.12419
			4.895	1.19672			15.014	3.6706				4.485	1.11383			9.376	2.32849				4.93	1.12426			3.106	0.708309											76.046	1.2804			28.724	0.483632				56.494	1.31556
			4.66	1.13927			7.987	1.95265				4.917	1.22112			10.456	2.59671				1.949	0.44446			3.109	0.708993											75.869	1.27742			25.755	0.433642				57.158	1.33102
			4.644	1.13536			11.942	2.91956				4.296	1.06689			6.441	1.5996				4.354	0.99291			2.472	0.563728											81.991	1.3805			18.072	0.304282				52.105	1.21335
			4.768	1.16567			11.965	2.92519				1.828	0.453976			14.862	3.69092				2.549	0.581288			1.508	0.343892											76.088	1.28111			18.582	0.312869				17.097	0.398133
			4.495	1.09893			13.865	3.3897				5.415	1.34479			9.47	2.35184				4.577	1.04376			2.396	0.546397											77.678	1.30788			21.395	0.360232				52.582	1.22446
			3.625	0.886235			8.249	2.0167				5.055	1.25539			25.938	6.4416				4.138	0.943652			1.788	0.407745											72.014	1.21251			23.431	0.394513				63.08	1.46893
			3.788	0.926085			17.433	4.262				4.701	1.16747			2.602	0.646196				2.977	0.678891			1.753	0.399764											55.349	0.931923			18.743	0.31558				58.912	1.37187
			4.153	1.01532			7.244	1.771				3.59	0.891562			6.034	1.49852				6.725	1.53361			2.202	0.502156											55.867	0.940644			18.786	0.316304				56.788	1.32241
			3.14	0.767663			10.386	2.53916				5.413	1.3443			5.624	1.3967				5.689	1.29735			2.075	0.473194											57.664	0.970901			17.843	0.300426				47.529	1.10679
			4.072	0.995517			8.838	2.1607				5.609	1.39297			5.834	1.44885				2.917	0.665208			1.306	0.297827											56.956	0.95898			18.042	0.303777				56.912	1.32529
			4.954	1.21115			8.607	2.10423				1.502	0.373016			3.423	0.850088				5.226	1.19177			2.296	0.523592											74.171	1.24883			22.458	0.37813				15.092	0.351443
			5.677	1.38791			11.866	2.90098				4.938	1.22633			4.439	1.10241				3.98	0.907621			1.364	0.311054											65.958	1.11055			19.343	0.325682				50.599	1.17828
			4.472	1.09331			8.779	2.14628				5.404	1.34206			3.918	0.97302				2.505	0.571254			2.266	0.516751											70.51	1.18719			25.731	0.433238				69.34	1.6147
			4.529	1.10724			9.158	2.23894				5.565	1.38205			18.96	4.70864				2.738	0.624388			1.332	0.303756											66.64	1.12203			24.909	0.419398				59.006	1.37406
			3.81	0.931464			3.528	0.862521				4.919	1.22161			3.024	0.750998				5.578	1.27204			1.242	0.283232											56.992	0.959586			22.778	0.383518				49.235	1.14652
			4.612	1.12754			8.854	2.16461				4.807	1.1938			4.195	1.04181				4.79	1.09234			2.111	0.481404											71.059	1.19644			22.927	0.386027				63.244	1.47275
			4.879	1.19281			14.667	3.58577				5.876	1.45928			10.733	2.6655				2.056	0.468861			2.333	0.53203											82.897	1.39575			16.193	0.272645				60.649	1.41232
			3.904	0.954445			5.604	1.37006				5.019	1.24645			11.406	2.83263				3.366	0.767601			0.875	0.19954											66.207	1.11474			26.268	0.44228				68.006	1.58364
			4.548	1.11189			7.91	1.93383				5.438	1.35051			11.27	2.79886				2.976	0.678663			2.429	0.553922											87.801	1.47832			14.372	0.241984				60.071	1.39886
			4.949	1.20992			15.773	3.85616				4.409	1.09496			13.774	3.42072				2.453	0.559395			1.271	0.289846											80.027	1.34743			14.296	0.240705				59.621	1.38838
			3.695	0.903349			11.131	2.72129				4.746	1.17865			3.687	0.915652				4.777	1.08937			0.087	0.0198399											58.434	0.983866			14.294	0.240671				65.016	1.51401
			4.483	1.096			6.214	1.51919				4.355	1.08155			3.357	0.833697				4.11	0.937266			2.541	0.579463											68.528	1.15382			21.501	0.362017				40.116	0.93417
			3.958	0.967646			15.665	3.82976				4.95	1.22931			3.021	0.750253				2.574	0.586989			0.381	0.0868853											56.489	0.951117			18.961	0.31925				58.848	1.37038
			3.306	0.808246			13.316	3.25548				5.803	1.44115			3.447	0.856049				2.392	0.545485			1.257	0.286653											49.412	0.83196			23.923	0.402797				51.105	1.19007
			0.651	0.159156			13.075	3.19656				1.124	0.279141			2.351	0.583861				2.339	0.533398			2.766	0.630773											5.355	0.0901633			18.609	0.313324				16.744	0.389913
			4.506	1.10162			9.8	2.39589				4.982	1.23726			6.992	1.73644				4.048	0.923128			0.125	0.0285057											71.82	1.20925			18.62	0.313509				66.102	1.5393
			3.46	0.845896			11.964	2.92494				4.935	1.22559			9.108	2.26194				2.705	0.616863			2.122	0.483912											54.826	0.923117			22.124	0.372506				54.745	1.27483
			3.494	0.854208			4.692	1.14709				5.09	1.26408			2.762	0.685932				2.78	0.633966			1.182	0.26955											61.954	1.04313			19.961	0.336088				45.291	1.05468
			5.091	1.24464			6.572	1.60671				6.545	1.62542			2.861	0.710518				2.593	0.591322			1.274	0.29053											92.127	1.55116			20.699	0.348513				68.483	1.59474
			4.181	1.02217			11.333	2.77068				5.974	1.48362			4.321	1.0731				2.485	0.566693			0.949	0.216415											70.638	1.18935			21.415	0.360569				61.623	1.435
			3.996	0.976937			20.548	5.02355				5.458	1.35547			2.146	0.53295				4.667	1.06429			0.108	0.0246289											65.188	1.09758			18.237	0.30706				46.936	1.09299
			5.235	1.27985			4.91	1.20039				6.103	1.51566			6.31	1.56706				2.963	0.675698			0.365	0.0832366											88.145	1.48412			21.581	0.363364				58.14	1.35389
			4.239	1.03634			19.337	4.72748				5.068	1.25862			4.992	1.23974				4.571	1.0424			1.441	0.328613											55.898	0.941166			13.74	0.231343				56.579	1.31754
			4.943	1.20846			7.434	1.81745				4.809	1.1943			6.641	1.64927				3.341	0.7619			1.194	0.272286											67.631	1.13872			20.727	0.348985				56.462	1.31481
			3.763	0.919973			13.926	3.40461				2.395	0.594789			7.27	1.80548				2.989	0.681628			0.167	0.0380836											57.846	0.973965			22.582	0.380218				31.037	0.72275
			4.414	1.07913			9.259	2.26363				5.858	1.45481			12.612	3.13214				5.616	1.2807			1.488	0.339332											51.028	0.859169			19.038	0.320547				71.644	1.66835
			3.862	0.944176			17.185	4.20137				4.229	1.05026			2.214	0.549838				3.76	0.857451			2.451	0.558939											68.274	1.14954			21.657	0.364643				52.063	1.21238
			4.291	1.04906			9.571	2.33991				0.731	0.181541			20.432	5.07421				3.24	0.738867			1.634	0.372626											68.035	1.14552			20.915	0.35215				10.382	0.241763
			0.677	0.165512			5.677	1.38791				5.363	1.33188			12.784	3.17486				5.347	1.21936			1.827	0.416639											13.348	0.224743			19.043	0.320631				43.555	1.01425
			4.403	1.07644			7.409	1.81134				4.555	1.13122			3.791	0.94148				3.901	0.889605			1.477	0.336823											70.955	1.19468			24.768	0.417024				52.25	1.21673
			3.498	0.855186			26.982	6.59652				5.426	1.34753			17.2	4.27155				3.616	0.824612			1.38	0.314703											41.963	0.70654			16.52	0.278151				62.579	1.45726
			3.202	0.782821			9.459	2.31252				4.684	1.16325			4.507	1.1193				2.985	0.680715			2.587	0.589953											42.541	0.716272			17.292	0.291149				52.721	1.2277
			5.312	1.29867			20.165	4.92991				3.747	0.930552			3.836	0.952655				4.46	1.01708			1.668	0.38038											70.603	1.18876			19.791	0.333225				47.424	1.10435
			4.157	1.0163			17.253	4.21799				4.247	1.05473			11.048	2.74373				2.419	0.551642			0.573	0.13067											62.771	1.05689			23.036	0.387862				42.516	0.990058
			3.955	0.966913			4.418	1.08011				4.88	1.21193			7.607	1.88917				2.457	0.560307			1.598	0.364416											67.98	1.14459			18.015	0.303322				62.304	1.45086
			4.244	1.03757			7.632	1.86586				5.221	1.29661			4.62	1.14736				2.804	0.639439			1.562	0.356207											49.448	0.832566			26.633	0.448425				66.857	1.55688
			4.357	1.06519			12.817	3.13348				5.273	1.30953			8.03	1.99422				2.089	0.476387			2.296	0.523592											70.09	1.18012			16.957	0.285509				57.501	1.33901
			5.585	1.36541			10.452	2.55529				5.097	1.26582			14.877	3.69464				2.197	0.501016			0.867	0.197715											64.766	1.09048			20.889	0.351713				56.719	1.3208
			4.544	1.11091			5.93	1.44976				5.228	1.29835			14.682	3.64622				3.849	0.877747			2.636	0.601128											68.411	1.15185			13.168	0.221712				69.656	1.62206
			4.042	0.988183			14.343	3.50656				4.703	1.16797			5.381	1.33635				2.404	0.548221			0.959	0.218696											51.445	0.86619			24.815	0.417815				51.764	1.20541
			4.371	1.06862			4.349	1.06324				4.09	1.01574			2.815	0.699094				3.39	0.773074			1.338	0.305125											65.788	1.10769			21.924	0.369139				41.033	0.955524
			0.78	0.190693			8.446	2.06487				4.822	1.19752			6.734	1.67236				2.814	0.64172			2.214	0.504892											9.767	0.164449			18.867	0.317668				55.863	1.30087
			3.852	0.941732			15.758	3.85249				4.948	1.22882			2.392	0.594044				2.479	0.565324			1.841	0.419832											55.095	0.927646			20.738	0.34917				56.434	1.31416
			3.607	0.881834			11.385	2.78339				5.105	1.26781			4.128	1.02517				2.991	0.682084			2.227	0.507857											54.212	0.912779			13.472	0.226831				62.708	1.46026
			4.113	1.00554			6.045	1.47787				5.768	1.43246			12.978	3.22303				2.413	0.550273			1.266	0.288705											60.776	1.0233			17.64	0.297008				62.17	1.44774
			4.779	1.16836			12.817	3.13348				3.734	0.927324			16.955	4.21071				3.739	0.852662			1.804	0.411394											62.631	1.05453			20.021	0.337098				46.396	1.08041
			4.534	1.10847			3.289	0.80409				5.634	1.39918			11.607	2.88255				2.771	0.631914			1.053	0.240132											57.503	0.96819			18.103	0.304804				69.34	1.6147
			4.165	1.01825			7.142	1.74607				4.874	1.21044			4.412	1.0957				2.675	0.610021			1.237	0.282092											59.535	1.0024			23.161	0.389967				59.74	1.39115
			0.799	0.195338			10.777	2.63475				4.527	1.12426			13.193	3.27643				2.514	0.573306			2.4	0.547309											13.468	0.226764			18.322	0.308491				44.445	1.03498
			3.254	0.795533			7.57	1.8507				5.096	1.26557			20.041	4.9771				3.127	0.713098			3.304	0.753462											36.045	0.606897			25.873	0.435629				59.119	1.37669
			4.499	1.09991			5.759	1.40795				4.819	1.19678			17.908	4.44738				4.213	0.960755			1.554	0.354383											64.704	1.08943			22.59	0.380353				50.65	1.17947
			2.99	0.730991			7.539	1.84312				5.648	1.40266			4.324	1.07385				2.569	0.585849			1.575	0.359171											45.861	0.772171			22.96	0.386582				65.944	1.53562
			3.982	0.973514			12.747	3.11637				4.147	1.02989			3.089	0.767141				3.427	0.781511			2.217	0.505577											58.371	0.982805			19.957	0.33602				40.107	0.93396
			3.69	0.902126			7.943	1.94189				4.717	1.17145			2.427	0.602736				0.454	0.103533			2.74	0.624844											60.201	1.01362			17.052	0.287108				56.358	1.31239
			3.334	0.815092			9.206	2.25067				4.788	1.18908			12.111	3.00772				2.814	0.64172			1.971	0.449477											50.235	0.845817			20.957	0.352857				46.204	1.07594
			0.846	0.206829			7.553	1.84655				5.907	1.46698			18.647	4.63091				2.733	0.623248			2.157	0.491894											8.906	0.149952			20.029	0.337232				63.95	1.48919
			2.713	0.663271			9.203	2.24994				5.189	1.28867			6.042	1.50051				2.496	0.569201			3.098	0.706485											39.155	0.659261			25.144	0.423355				59.63	1.38859
			3.809	0.931219			5.229	1.27838				4.932	1.22484			11.16	2.77154				2.874	0.655402			1.698	0.387221											52.868	0.89015			23.543	0.396398				40.748	0.948887
			4.503	1.10089			16.296	3.98402				5.549	1.37807			14.976	3.71923				3.159	0.720395			0.681	0.155299											59.204	0.99683			19.987	0.336525				65.904	1.53469
			2.488	0.608263			10.666	2.60761				3.525	0.87542			9.836	2.44273				2.964	0.675926			2.133	0.486421											34.164	0.575226			19.326	0.325396				47.875	1.11485
			2.903	0.709721			11.068	2.70589				4.553	1.13072			6.153	1.52807				2.37	0.540468			0.186	0.0424164											46.64	0.785288			22.652	0.381397				37.675	0.877327
			5.215	1.27496			14.981	3.66253				1.198	0.297518			1.994	0.495202				2.248	0.512646			2.473	0.563956											55.096	0.927663			21.029	0.35407				15.939	0.371167
			4.095	1.00114			9.719	2.37609				4.428	1.09968			25.402	6.30848				2.816	0.642176			1.339	0.305353											63.501	1.06918			27.597	0.464657				54.584	1.27108
			4.623	1.13022			7.737	1.89153				5.429	1.34827			25.343	6.29383				3.697	0.843084			1.791	0.408429											64.89	1.09257			17.538	0.295291				63.592	1.48085
			4.428	1.08255			6.835	1.67101				4.122	1.02368			4.632	1.15034				2.939	0.670225			1.664	0.379467											48.82	0.821993			24.565	0.413606				48.459	1.12845
			3.215	0.785999			6.614	1.61698				5.429	1.34827			8.717	2.16483				2.627	0.599075			6.184	1.41023											46.363	0.780624			30.123	0.507187				64.362	1.49878
			3.858	0.943199			5.195	1.27007				5.622	1.3962			2.556	0.634772				2.809	0.640579			2.662	0.607057											55.823	0.939904			24.571	0.413707				61.971	1.4431
			3.247	0.793822			11.922	2.91467				4.777	1.18635			19.676	4.88646				3.142	0.716519			2.759	0.629177											44.991	0.757523			19.332	0.325497				55.516	1.29279
			3.782	0.924618			11.094	2.71225				6.282	1.56011			5.315	1.31996				2.426	0.553238			1.456	0.332034											51.283	0.863463			22.2	0.373786				70.15	1.63356
			3.852	0.941732			15.497	3.78869				6.036	1.49902			10.829	2.68934				2.337	0.532942			0.816	0.186085											54.078	0.910523			23.152	0.389815				59.387	1.38293
			0.854	0.208785			3.406	0.832694				4.964	1.23279			2.404	0.597024				3.367	0.767829			1.766	0.402728											11.533	0.194184			23.56	0.396685				49.71	1.15758
			3.869	0.945888			17.976	4.39475				4.141	1.0284			3.152	0.782787				2.698	0.615266			1.936	0.441496											47.205	0.794801			18.88	0.317887				50.079	1.16618
			4.043	0.988427			10.53	2.57436				4.642	1.15282			5.121	1.27178				2.451	0.558939			1.512	0.344805											50.978	0.858327			21.601	0.363701				57.74	1.34457
			3.601	0.880368			6.955	1.70035				5.336	1.32517			6.297	1.56383				2.237	0.510137			1.396	0.318351											51.919	0.874171			19.623	0.330397				52.083	1.21284
			4.837	1.18254			10.907	2.66653				5.291	1.314			23.801	5.91088				3.629	0.827577			1.621	0.369662											54.865	0.923774			21.563	0.363061				51.786	1.20593
			3.18	0.777442			6.845	1.67346				3.508	0.871198			2.508	0.622852				3.039	0.69303			1.828	0.416867											46.701	0.786315			18.606	0.313273				50.691	1.18043
			3.579	0.874989			6.682	1.63361				5.33	1.32368			5.187	1.28817				4.939	1.12632			1.85	0.421884											46.001	0.774529			23.351	0.393166				57.252	1.33321
			3.445	0.842229			8.626	2.10887				4.442	1.10315			3.872	0.961596				2.501	0.570341			1.447	0.329982											44.484	0.748986			22.985	0.387003				59.278	1.38039
			2.558	0.625376			6.21	1.51821				3.976	0.987424			3.262	0.810105				2.497	0.569429			1.296	0.295547											26.666	0.448981			26.063	0.438828				55.373	1.28946
			4.845	1.1845			7.442	1.81941				0.645	0.160183			2.973	0.738333				2.609	0.59497			2.137	0.487333											63.077	1.06204			26.125	0.439872				9.106	0.212049
			4.12	1.00725			5.075	1.24073				6.373	1.58271			6.037	1.49926				3.426	0.781283			0.259	0.0590638											55.545	0.935223			17.986	0.302834				50.509	1.17619
			4.704	1.15003			5.65	1.3813				5.272	1.30928			2.582	0.641229				2.615	0.596339			2.294	0.523136											59.715	1.00543			24.6	0.414195				58.184	1.35491
			2.618	0.640045			13.03	3.18556				5.328	1.32319			3.805	0.944956				3.03	0.690977			0.448	0.102164											34.696	0.584184			18.797	0.316489				65.771	1.53159
			4.595	1.12338			10.214	2.4971				4.956	1.2308			3.142	0.780303				2.813	0.641492			0.456	0.103989											58.213	0.980145			19.964	0.336138				58.624	1.36516
			3.507	0.857387			4.881	1.1933				6.138	1.52435			2.524	0.626825				2.179	0.496911			3.888	0.88664											52.781	0.888685			18.722	0.315226				55.675	1.29649
			3.869	0.945888			5.999	1.46663				5.091	1.26433			0.59	0.146524				2.813	0.641492			6.259	1.42734											65.875	1.10915			25.389	0.42748				50.112	1.16694
			4.723	1.15467			7.579	1.8529				4.406	1.09421			8.279	2.05606				2.493	0.568517			3.453	0.787441											57.506	0.968241			21.674	0.36493				52.81	1.22977
			6.52	1.594			4.553	1.11311				4.924	1.22286			3.321	0.824757				2.165	0.493718			7.835	1.78674											68.587	1.15481			17.658	0.297311				51.582	1.20118
			3.443	0.84174			6.881	1.68226				5.07	1.25911			7.86	1.952				2.993	0.68254			1.382	0.315159											42.829	0.721121			29.827	0.502203				62.951	1.46592
			3.351	0.819248			5.596	1.3681				5.384	1.33709			1.735	0.43088				2.452	0.559167			0.249	0.0567833											60.591	1.02018			25.853	0.435292				54.191	1.26193
			3.563	0.871077			5.218	1.27569				4.664	1.15829			9.503	2.36003				2.86	0.65221			2.788	0.63579											46.059	0.775505			30.782	0.518283				50.228	1.16965
			4.252	1.03952			9.56	2.33722				5.662	1.40613			4.234	1.0515				3.515	0.801579			2.055	0.468633											61.264	1.03151			17.232	0.290139				67.526	1.57246
			4.363	1.06666			3.846	0.940265				5.467	1.35771			4.198	1.04256				1.359	0.309914			2.696	0.61481											58.282	0.981306			28.752	0.484103				71.433	1.66344
			3.694	0.903104			3.462	0.846385				6.759	1.67857			2.233	0.554557				2.219	0.506033			2.886	0.658139											58.202	0.979959			23.041	0.387946				61.852	1.44033
			4.868	1.19012			4.508	1.10211				4.548	1.12948			2.554	0.634276				2.113	0.48186			1.057	0.241044											58.907	0.99183			31.587	0.531837				43.972	1.02396
			4.581	1.11996			5.569	1.3615				3.41	0.84686			4.488	1.11458				2.891	0.659279			2.024	0.461564											59.248	0.997571			22.287	0.375251				50.636	1.17915
			5.065	1.23828			4.681	1.1444				5.262	1.3068			10.022	2.48892				2.839	0.647421			2.305	0.525645											73.533	1.23809			27.288	0.459454				69.594	1.62062
			5.894	1.44096			10.879	2.65968				5.216	1.29537			5.498	1.36541				2.361	0.538415			1.375	0.313562											66.486	1.11944			22.516	0.379107				72.56	1.68968
			3.911	0.956156			5.112	1.24977				5.564	1.3818			4.63	1.14984				2.434	0.555062			3.464	0.789949											48.492	0.81647			21.623	0.364071				65.528	1.52593
			2.387	0.583571			7.526	1.83995				5.249	1.30357			6.356	1.57849				2.715	0.619143			3.45	0.786757											47.098	0.792999			24.967	0.420375				81.463	1.89701
			4.387	1.07253			8.582	2.09812				5.855	1.45407			13.603	3.37825				2.243	0.511506			0.203	0.0462932											64.219	1.08127			29.63	0.498887				64.272	1.49668
			4.953	1.2109			8.786	2.14799				5.014	1.24521			5.357	1.33039				2.421	0.552098			4.457	1.0164											56.906	0.958138			23.926	0.402847				69.185	1.61109
			4.038	0.987205			4.19	1.02437				0.714	0.177319			5.734	1.42402				2.182	0.497595			1.003	0.22873											51.77	0.871662			20.119	0.338748				12.837	0.298932
			2.158	0.527585			6.907	1.68861				5.57	1.38329			4.002	0.993881				2.258	0.514926			1.807	0.412078											33.408	0.562498			28.342	0.4772				64.83	1.50968
			2.523	0.61682			3.366	0.822915				2.435	0.604722			3.365	0.835684				2.653	0.605004			3.574	0.815034											32.426	0.545963			18.441	0.310495				26.555	0.618379
			4.296	1.05028			3.719	0.909216				5.704	1.41657			5.875	1.45903				2.53	0.576955			1.849	0.421656											52.28	0.880249			18.137	0.305376				64.886	1.51098
			0.897	0.219297			5.17	1.26395				4.022	0.998848			4.681	1.16251				2.196	0.500788			3.164	0.721536											20.704	0.348598			29.057	0.489239				39.149	0.911652
			5.282	1.29134			6.71	1.64045				4.049	1.00555			13.581	3.37279				2.248	0.512646			3.613	0.823928											85.683	1.44266			28.928	0.487067				42.216	0.983072
			0.808	0.197539			15.372	3.75813				3.789	0.940983			3.886	0.965073				2.784	0.634878			2.796	0.637615											14.362	0.241816			21.478	0.36163				42.756	0.995647
			5.233	1.27936			9.096	2.22378				4.337	1.07708			7.002	1.73892				2.267	0.516979			2.149	0.490069											63.286	1.06556			34.7	0.584251				42.997	1.00126
			3.921	0.958601			10.376	2.53671				4.624	1.14835			3.366	0.835933				2.501	0.570341			3.878	0.88436											59.993	1.01011			36.489	0.614373				60.401	1.40654
			4.757	1.16298			7.301	1.78494				4.578	1.13693			4.265	1.0592				2.564	0.584708			2.714	0.618915											67.186	1.13122			18.927	0.318678				47.127	1.09743
			0.799	0.195338			8.714	2.13039				4.465	1.10886			3.292	0.817555				2.495	0.568973			3.498	0.797703											12.619	0.212469			21.775	0.36663				51.555	1.20055
			3.349	0.818759			4.265	1.0427				5.558	1.38031			12.501	3.10457				2.693	0.614126			1.96	0.446969											36.285	0.610938			22.475	0.378416				54.802	1.27616
			2.715	0.663759			9.369	2.29052				3.079	0.764657			8.617	2.14				2.513	0.573078			1.244	0.283688											40.661	0.684618			29.258	0.492623				32.477	0.756283
			4.264	1.04246			1.476	0.36085				4.358	1.08229			3.094	0.768382				2.486	0.566921			2.268	0.517207											63.125	1.06285			5.699	0.0959553				49.753	1.15858
			3.625	0.886235			30.223	7.38888				4.17	1.0356			5.4	1.34107				2.726	0.621652			7.154	1.63144											53.353	0.898316			25.363	0.427042				46.865	1.09133
			4.094	1.0009			7.317	1.78885				0.908	0.225498			6.982	1.73395				1.923	0.438531			3.689	0.841259											65.404	1.10122			20.466	0.34459				3.875	0.090236
			3.396	0.830249			5.061	1.23731				3.551	0.881877			3.882	0.964079				2.108	0.48072			0.186	0.0424164											47.69	0.802967			21.77	0.366546				39.836	0.92765
			4.08	0.997473			4.887	1.19477				4.075	1.01201			5.322	1.3217				2.722	0.620739			1.932	0.440584											53.161	0.895083			29.786	0.501513				42.182	0.98228
			4.718	1.15345			6.999	1.71111				4.302	1.06838			2.979	0.739823				3.106	0.708309			2.352	0.536363											61.161	1.02978			24.103	0.405827				53.027	1.23482
			5.348	1.30747			8.627	2.10912				4.422	1.09819			0.526	0.13063				2.833	0.646053			0.264	0.060204											56.862	0.957397			21.911	0.36892				44.813	1.04355
			4.681	1.1444			4.045	0.988916				4.514	1.12103			3.083	0.765651				2.814	0.64172			1.916	0.436935											70.346	1.18443			23.532	0.396213				49.205	1.14582
			3.124	0.763751			9.726	2.3778				3.474	0.862754			4.686	1.16375				2.278	0.519487			2.35	0.535907											49.235	0.82898			27.782	0.467771				38.801	0.903548
			5.287	1.29256			3.962	0.968624				5.888	1.46226			6.804	1.68975				2.005	0.457231			4.012	0.914918											71.85	1.20975			23.54	0.396348				65.852	1.53348
			4.484	1.09624			2.477	0.605574				4.663	1.15804			0.372	0.0923847				2.166	0.493946			2.206	0.503068											50.981	0.858378			21.926	0.369173				52.248	1.21668
			4.152	1.01508			3.679	0.899437				5.872	1.45829			8.584	2.1318				2.551	0.581744			2.168	0.494402											57.076	0.961001			22.232	0.374325				65.897	1.53452
			4.556	1.11384			4.859	1.18792				4.909	1.21913			5.479	1.36069				2.378	0.542292			1.719	0.39201											61.391	1.03365			28.937	0.487218				52.054	1.21217
			4.493	1.09844			4.067	0.994295				3.89	0.966066			7.129	1.77046				2.033	0.463616			2.126	0.484824											51.654	0.869709			13.462	0.226663				45.235	1.05337
			0.767	0.187515			6.633	1.62163				3.104	0.770866			5.181	1.28668				2.406	0.548677			1.267	0.288933											9.114	0.153454			23.446	0.394765				38.896	0.90576
			3.939	0.963001			1.886	0.461087				3.987	0.990155			9.423	2.34016				2.229	0.508313			1.968	0.448793											54.01	0.909378			13.321	0.224288				48.373	1.12645
			4.509	1.10235			2.917	0.713144				4.562	1.13295			9.731	2.41665				3.013	0.687101			2.226	0.507629											53.2	0.89574			26.953	0.453813				50.535	1.17679
			4.14	1.01214			3.646	0.891369				4.991	1.23949			4.537	1.12675				2.365	0.539327			2.913	0.664296											57.666	0.970935			20.357	0.342755				61.694	1.43665
			3.96	0.968135			7.947	1.94287				4.872	1.20994			2.227	0.553067				2.237	0.510137			2.783	0.63465											49.428	0.83223			32.797	0.55221				53.094	1.23638
			3.926	0.959823			2.884	0.705076				4.732	1.17517			10.384	2.57882				2.322	0.529521			2.321	0.529293											50.052	0.842736			26.608	0.448005				36.555	0.851246
			5.156	1.26053			4.333	1.05933				4.928	1.22385			2.538	0.630302				2.647	0.603636			1.36	0.310142											68.672	1.15624			27.996	0.471375				66.923	1.55842
			4.552	1.11287			8.409	2.05582				4.831	1.19976			2.501	0.621113				1.854	0.422796			1.801	0.41071											57.441	0.967146			23.121	0.389293				41.113	0.957387
			5.141	1.25686			7.023	1.71697				3.942	0.97898			1.452	0.360598				2.345	0.534766			1.881	0.428953											62.919	1.05938			20.422	0.34385				48.265	1.12393
			2.905	0.71021			4.447	1.0872				4.191	1.04082			4.596	1.1414				2.192	0.499875			2.143	0.488701											37.192	0.62621			32.16	0.541485				51.505	1.19938
			4.735	1.15761			6.672	1.63116				4.382	1.08825			2.3	0.571196				1.831	0.417551			2.518	0.574218											60.834	1.02427			24.908	0.419381				40.838	0.950983
			5.005	1.22362			10.016	2.4487				4.355	1.08155			3.194	0.793217				2.271	0.517891			1.081	0.246517											60.294	1.01518			19.756	0.332636				42.722	0.994855
			4.019	0.98256			3.671	0.897481				4.696	1.16623			4.603	1.14314				2.32	0.529065			1.08	0.246289											57.408	0.966591			23.84	0.401399				53.368	1.24277
			4.423	1.08133			3.201	0.782576				2.63	0.65315			3.179	0.789492				2.203	0.502384			2.581	0.588585											76.35	1.28552			20.22	0.340448				31.19	0.726313
			3.598	0.879634			4.397	1.07497				5.601	1.39099			5.092	1.26458				2.437	0.555747			2.211	0.504208											44.531	0.749778			18.947	0.319015				65.461	1.52437
			3.059	0.74786			7.255	1.77369				5.146	1.27799			2.73	0.677985				2.682	0.611618			2.064	0.470686											28.739	0.483885			31.693	0.533622				58.56	1.36367
			3.982	0.973514			2.128	0.520251				3.515	0.872936			1.777	0.441311				2.249	0.512874			2.62	0.597479											49.741	0.8375			26.272	0.442347				40.964	0.953917
			4.51	1.1026			5.796	1.417				5.251	1.30406			1.882	0.467387				2.762	0.629861			1.724	0.39315											65.374	1.10072			22.221	0.37414				50.462	1.17509
			4.93	1.20528			10.756	2.62961				3.985	0.989659			11.601	2.88106				1.935	0.441268			2.024	0.461564											67.053	1.12899			23.21	0.390792				44.317	1.032
			4.296	1.05028			5.089	1.24415				5.314	1.31971			2.107	0.523265				2.499	0.569885			0.27	0.0615722											67.62	1.13853			21.444	0.361057				63.618	1.48145
			5.168	1.26347			4.15	1.01459				4.604	1.14338			7.255	1.80175				2.653	0.605004			0.171	0.0389958											63.628	1.07132			23.997	0.404043				49.115	1.14373
			5.263	1.28669			7.449	1.82112				4.42	1.09769			7.738	1.9217				1.015	0.231466			1.314	0.299652											65.53	1.10334			30.512	0.513737				49.416	1.15074
			5.358	1.30992			3.261	0.797245				5.082	1.26209			5.241	1.30158				1.64	0.373994			1.606	0.366241											76.025	1.28005			27.785	0.467822				52.006	1.21105
			4.21	1.02926			5.45	1.33241				3.002	0.745535			4.515	1.12128				2.512	0.57285			1.954	0.445601											51.415	0.865685			24.466	0.411939				37.126	0.864543
			2.489	0.608507			5.369	1.31261				3.743	0.929559			5.517	1.37012				1.838	0.419147			1.298	0.296003											45.963	0.773889			21.822	0.367422				42.252	0.98391
			5.856	1.43167			5.14	1.25662				4.52	1.12252			6.891	1.71135				2.246	0.51219			2.395	0.546169											66.211	1.11481			24.855	0.418489				48.847	1.13749
			4.983	1.21824			4.195	1.02559				3.964	0.984444			6.832	1.6967				2.364	0.539099			1.509	0.34412											73.211	1.23267			34.064	0.573543				49.574	1.15442
			4.993	1.22068			4.223	1.03243				5.755	1.42923			5.013	1.24496				2.295	0.523364			1.16	0.264533											60.215	1.01385			25.812	0.434602				66.662	1.55234
			4.321	1.05639			14.491	3.54274				5.018	1.2462			3.454	0.857787				2.235	0.509681			1.219	0.277987											53.893	0.907408			27.623	0.465094				67.46	1.57092
			0.915	0.223698			3.726	0.910927				4.914	1.22037			9.297	2.30887				2.576	0.587445			0.625	0.142528											21.88	0.368398			23.914	0.402645				68.053	1.58473
			4.398	1.07522			3.513	0.858853				5.896	1.46425			18.026	4.47668				2.277	0.519259			2.506	0.571482											55.703	0.937883			22.183	0.3735				65.143	1.51697
			5.538	1.35392			3.987	0.974736				3.422	0.84984			9.218	2.28925				2.037	0.464528			3.299	0.752322											95.085	1.60097			27.22	0.458309				45.027	1.04853
			0.722	0.176514			7.737	1.89153				4.998	1.24123			4.894	1.21541				2.169	0.49463			2.842	0.648105											12.875	0.216779			17.888	0.301184				56.199	1.30869
			5.449	1.33216			6.176	1.5099				5.416	1.34504			12.86	3.19373				2.754	0.628037			1.299	0.296231											67.842	1.14227			20.523	0.34555				42.201	0.982723
			4.484	1.09624			8.884	2.17195				5.097	1.26582			7.773	1.93039				2.048	0.467037			3.313	0.755514											68.723	1.1571			19.091	0.321439				49.561	1.15411
			5.167	1.26322			1.655	0.404612				4.973	1.23502			12.375	3.07328				1.777	0.405237			4.331	0.987664											71.566	1.20497			14.023	0.236108				54.55	1.27029
			4.001	0.978159			5.183	1.26713				4.177	1.03734			8.343	2.07195				2.533	0.577639			2.022	0.461108											58.642	0.987368			22.942	0.386279				49.03	1.14175
			4.968	1.21457			3.423	0.83685				5.013	1.24496			3.747	0.930552				2.257	0.514698			4.594	1.04764											71.343	1.20122			23.875	0.401988				62.509	1.45563
			7	1.71135			4.419	1.08035				4.018	0.997854			3.9	0.968549				2.1	0.478895			1.275	0.290758											91.146	1.53464			29.395	0.49493				45.248	1.05368
			4.703	1.14978			2.39	0.584304				4.369	1.08502			4.155	1.03188				2.004	0.457003			3.011	0.686645											58.924	0.992116			28.647	0.482336				55.191	1.28522
			4.75	1.16127			3.753	0.917528				4.678	1.16176			5.282	1.31176				2.327	0.530662			1.365	0.311282											56.308	0.94807			33.996	0.572398				58.728	1.36758
			5.475	1.33852			6.095	1.4901				5.044	1.25266			2.384	0.592057				2.172	0.495315			1.661	0.378783											82.789	1.39394			28	0.471442				55.758	1.29842
			3.139	0.767418			2.421	0.591883				5.299	1.31599			8.873	2.20357				2.442	0.556887			3.602	0.821419											56.743	0.955394			24.746	0.416654				64.868	1.51056
			4.008	0.97987			2.708	0.662048				5.681	1.41085			5.283	1.31201				2.208	0.503524			3.713	0.846732											55.015	0.926299			18.512	0.31169				62.607	1.45791
			5.525	1.35074			2.532	0.61902				4.615	1.14612			5.045	1.25291				2.399	0.547081			4.186	0.954598											70.996	1.19537			27.265	0.459067				61.643	1.43546
			2.41	0.589194			2.662	0.650802				4.048	1.0053			4.425	1.09893				1.834	0.418235			2.883	0.657455											35.744	0.601829			23.783	0.400439				54.573	1.27083
			4.674	1.14269			6.832	1.67028				4.903	1.21764			4.17	1.0356				2.158	0.492122			2.036	0.4643											54.695	0.920911			28.78	0.484575				66.902	1.55793
			3.994	0.976448			4.408	1.07766				5.214	1.29488			6.287	1.56135				2.708	0.617547			1.744	0.397711											64.253	1.08184			17.751	0.298877				51.548	1.20038
			3.87	0.946132			7.754	1.89569				4.481	1.11284			5.244	1.30233				1.971	0.449477			2.229	0.508313											47.362	0.797444			18.382	0.309502				58.066	1.35217
			3.967	0.969847			13.117	3.20683				4.808	1.19405			2.743	0.681213				2.144	0.488929			2.618	0.597023											62.594	1.05391			17.134	0.288489				54.55	1.27029
			4.947	1.20944			10.228	2.50053				3.806	0.945205			4.666	1.15878				1.998	0.455635			2.55	0.581516											82.089	1.38215			13.909	0.234189				51.722	1.20444
			4.812	1.17643			12.682	3.10048				4.983	1.23751			4.37	1.08527				1.975	0.45039			1.99	0.45381											64.131	1.07979			17.758	0.298995				57.449	1.3378
			4.644	1.13536			9.733	2.37951				5.54	1.37584			6.213	1.54297				2.687	0.612758			2.415	0.55073											71.05	1.19628			22.924	0.385976				63.611	1.48129
			5.499	1.34439			8.859	2.16584				0.687	0.170614			4.299	1.06764				1.765	0.4025			4.09	0.932706											58.798	0.989994			11.797	0.198629				10.878	0.253313
			5.738	1.40282			5.539	1.35417				3.686	0.915403			4.223	1.04877				2.687	0.612758			2.446	0.557799											71.402	1.20221			20.138	0.339068				39.039	0.90909
			5.471	1.33754			12.44	3.04131				3.833	0.95191			13.004	3.22949				2.076	0.473422			2.605	0.594058											77.513	1.3051			16.169	0.272241				51.535	1.20008
			4.449	1.08769			27.795	6.79528				4.857	1.20622			5.538	1.37534				2.208	0.503524			1.612	0.367609											64.814	1.09129			17.747	0.29881				62.258	1.44978
			5.668	1.3857			8.18	1.99984				4.452	1.10564			5.161	1.28171				2.247	0.512418			2.065	0.470914											65.798	1.10785			17.25	0.290442				49.045	1.1421
			5.529	1.35172			24.218	5.92078				5.185	1.28767			6.647	1.65076				2.277	0.519259			1.995	0.454951											83.423	1.40461			19.906	0.335162				72.435	1.68677
			3.984	0.974003			10.929	2.67191				4.217	1.04728			4.09	1.01574				2.759	0.629177			4.507	1.0278											66.182	1.11432			16.999	0.286216				50.073	1.16604
			5.321	1.30087			13.144	3.21343				5.191	1.28916			5.666	1.40713				2.203	0.502384			1.881	0.428953											55.853	0.940409			19.135	0.32218				54.896	1.27835
			5.754	1.40673			14.156	3.46084				4.467	1.10936			3.551	0.881877				1.842	0.42006			3.259	0.7432											75.336	1.26845			17.742	0.298726				56.709	1.32057
			4.684	1.14514			30.201	7.3835				5.229	1.2986			2.909	0.722438				2.039	0.464985			2.049	0.467265											59.227	0.997217			18.053	0.303962				47.212	1.09941
			5.211	1.27398			22.945	5.60956				4.088	1.01524			4.819	1.19678				1.897	0.432602			0.249	0.0567833											64.492	1.08587			18.958	0.3192				54.75	1.27495
			5.005	1.22362			9.393	2.29639				4.271	1.06069			5.037	1.25092				1.812	0.413218			1.074	0.244921											67.803	1.14161			14.539	0.244796				54.78	1.27565
			1.568	0.383343			7.94	1.94116				4.28	1.06292			14.894	3.69887				2.333	0.53203			3.387	0.77239											21.147	0.356057			27.504	0.463091				56.457	1.3147
			3.675	0.898459			3.643	0.890636				4.781	1.18734			4.859	1.20671				2.219	0.506033			1.461	0.333174											44.495	0.749172			20.536	0.345769				55.135	1.28391
			4.901	1.19819			9.422	2.30348				4.853	1.20522			3.282	0.815072				2.186	0.498507			2.293	0.522908											67.815	1.14182			19.646	0.330784				54.514	1.26945
			4.902	1.19843			17.162	4.19574				5.054	1.25514			1.822	0.452486				2.095	0.477755			2.687	0.612758											67.993	1.14481			20.453	0.344371				51.352	1.19582
			4.242	1.03708			9.419	2.30274				4.651	1.15506			6.819	1.69347				2.451	0.558939			1.079	0.246061											48.942	0.824047			35.992	0.606005				48.999	1.14103
			4.995	1.22117			4.981	1.21775				4.674	1.16077			4.475	1.11135				2.757	0.628721			0.986	0.224853											66.532	1.12021			21.365	0.359727				55.83	1.3001
			3.791	0.926819			17.221	4.21017				4.801	1.19231			3.696	0.917887				1.871	0.426673			2.097	0.478211											63.056	1.06169			15.256	0.256868				57.629	1.34199
			5.847	1.42947			5.058	1.23657				4.303	1.06863			2.839	0.705054				2.457	0.560307			1.723	0.392922											68.975	1.16135			17.917	0.301672				51.453	1.19817
			4.3	1.05126			7.978	1.95045				5.089	1.26383			4.112	1.0212				2.081	0.474562			0.981	0.223713											76.954	1.29569			24.917	0.419533				60.608	1.41136
			5.709	1.39573			5.405	1.32141				3.902	0.969046			10.226	2.53959				2.213	0.504664			1.116	0.254499											93.807	1.57945			24.266	0.408572				40.25	0.93729
			4.325	1.05737			10.918	2.66922				3.609	0.896281			8.822	2.19091				2.472	0.563728			0.519	0.118356											61.402	1.03384			13.951	0.234896				44.223	1.02981
			3.111	0.760573			21.005	5.13527				4.282	1.06342			22.399	5.5627				1.885	0.429866			2.332	0.531802											41.847	0.704587			18.486	0.311253				43.634	1.01609
			4.414	1.07913			25.868	6.32417				5.268	1.30829			3.03	0.752488				2.976	0.678663			1.867	0.425761											51.917	0.874137			21.281	0.358313				67.265	1.56638
			4.649	1.13658			25.346	6.19656				5.032	1.24968			3.031	0.752737				2.076	0.473422			1.782	0.406377											49.621	0.835479			23.823	0.401113				53.692	1.25031
			5.547	1.35612			28.687	7.01336				4.054	1.00679			3.307	0.82128				2.262	0.515839			0.667	0.152106											65.552	1.10371			20.58	0.34651				45.625	1.06246
			3.757	0.918506			7.204	1.76122				3.269	0.811843			3.366	0.835933				2.952	0.67319			1.452	0.331122											55.184	0.929145			19.378	0.326271				37.815	0.880587
			4.879	1.19281			7.761	1.8974				4.678	1.16176			7.253	1.80125				2.285	0.521084			1.916	0.436935											54.408	0.916079			24.609	0.414347				54.708	1.27397
			4.131	1.00994			6.42	1.56955				3.148	0.781793			2.649	0.657869				2.599	0.59269			3.363	0.766917											74.487	1.25415			19.932	0.335599				40.414	0.941109
			4.544	1.11091			15.094	3.69016				4.905	1.21814			2.831	0.703067				2.384	0.54366			2.615	0.596339											70.048	1.17941			17.929	0.301874				46.354	1.07943
			4.397	1.07497			5.288	1.2928				5.023	1.24744			6.367	1.58122				2.144	0.488929			0.999	0.227817											61.78	1.0402			22.488	0.378635				60.012	1.39748
			5.012	1.22533			3.722	0.909949				3.967	0.985189			3.862	0.959112				2.773	0.63237			1.02	0.232606											68.604	1.1551			21.905	0.368819				45.544	1.06057
			4.732	1.15687			6.586	1.61014				4.789	1.18933			12.101	3.00523				2.36	0.538187			1.161	0.264761											76.701	1.29143			20.691	0.348379				58.122	1.35347
			4.16	1.01703			5.801	1.41822				4.827	1.19877			3.955	0.982208				2.569	0.585849			1.047	0.238764											48.414	0.815157			33.753	0.568306				61.235	1.42596
			4.727	1.15565			9.196	2.24823				4.819	1.19678			3.246	0.806131				2.014	0.459283			1.028	0.234431											55.536	0.935071			20.565	0.346257				48.434	1.12787
			3.939	0.963001			7.802	1.90742				5.131	1.27426			9.232	2.29273				2.577	0.587673			1.114	0.254043											65.911	1.10976			22.455	0.37808				56.437	1.31423
			4.287	1.04808			6.627	1.62016				4.894	1.21541			2.657	0.659855				3.708	0.845592			1.738	0.396343											62.577	1.05362			26.965	0.454015				42.352	0.986239
			4.295	1.05004			4.592	1.12265				5.148	1.27849			7.547	1.87427				3.42	0.779915			0.979	0.223256											54.973	0.925592			30.42	0.512188				49.379	1.14987
			3.605	0.881345			2.596	0.634667				6.583	1.63486			8.883	2.20606				2.488	0.567377			2.145	0.489157											46.352	0.780438			19.505	0.32841				52.217	1.21596
			0.694	0.169668			3.354	0.819981				5.13	1.27401			7.069	1.75556				2.112	0.481632			0.847	0.193154											16.684	0.280912			22.631	0.381043				57.362	1.33577
			3.436	0.840029			8.704	2.12794				6.318	1.56905			4.922	1.22236				4.308	0.982419			1.345	0.306721											53.535	0.90138			26.725	0.449974				50.084	1.16629
			4.237	1.03586			6.149	1.5033				5.461	1.35622			5.065	1.25787				3.363	0.766917			2.794	0.637159											64.89	1.09257			23.159	0.389933				45.702	1.06425
			4.361	1.06617			3.184	0.77842				4.511	1.12029			6.386	1.58594				2.516	0.573762			2.456	0.560079											70.994	1.19534			27.72	0.466727				50.68	1.18017
			4.727	1.15565			9.533	2.33061				3.755	0.932539			2.171	0.539159				2.898	0.660875			2.083	0.475019											47.892	0.806368			19.969	0.336222				42.295	0.984912
			3.265	0.798223			3.126	0.76424				4.088	1.01524			8.742	2.17104				2.455	0.559851			2.543	0.579919											43.218	0.727671			18.921	0.318577				51.385	1.19659
			3.926	0.959823			7.412	1.81208				5.068	1.25862			5.638	1.40017				2.472	0.563728			2.168	0.494402											51.185	0.861813			34.527	0.581338				55.191	1.28522
			2.751	0.672561			5.759	1.40795				3.346	0.830966			3.912	0.97153				3.117	0.710817			0.737	0.168069											48.017	0.808472			27.023	0.454992				34.768	0.809633
			1.305	0.319045			4.955	1.21139				4.361	1.08304			5.822	1.44587				2.709	0.617775			1.553	0.354154											20.836	0.35082			23.894	0.402308				42.446	0.988428
			4.869	1.19037			9.281	2.26901				5.141	1.27675			3.332	0.827489				2.188	0.498963			2.925	0.667033											88.992	1.49838			27.997	0.471391				63.572	1.48038
			3.84	0.938798			5.703	1.39426				3.096	0.768879			7.557	1.87675				2.053	0.468177			2.653	0.605004											46.385	0.780994			24.879	0.418893				27.734	0.645834
			3.637	0.889169			7.557	1.84753				4.554	1.13097			6.288	1.5616				3.045	0.694398			2.014	0.459283											65.242	1.09849			21.601	0.363701				52.245	1.21661
			4.093	1.00065			4.736	1.15785				0.612	0.151988			4.236	1.05199				2.492	0.568289			1.772	0.404096											69.934	1.17749			22.631	0.381043				7.058	0.164358
			4.259	1.04123			7.21	1.76269				2.183	0.542139			2.048	0.508613				4.106	0.936354			1.425	0.324965											56.105	0.944652			30.07	0.506295				22.261	0.518386
			3.47	0.848341			5.13	1.25418				3.37	0.836926			7.047	1.75009				2.784	0.634878			1.905	0.434426											51.642	0.869507			19.691	0.331542				37.336	0.869433
			3.829	0.936109			15.262	3.73123				3.737	0.928069			3.285	0.815817				2.844	0.648561			1.134	0.258603											50.141	0.844235			27.543	0.463747				47.082	1.09639
			3.298	0.806291			10.102	2.46972				5.189	1.28867			3.664	0.90994				2.341	0.533854			1.769	0.403412											46.922	0.790036			25.155	0.42354				49.352	1.14925
			3.009	0.735636			7.354	1.7979				3.516	0.873185			4.69	1.16474				3.677	0.838523			1.41	0.321544											40.645	0.684348			25.055	0.421856				40.453	0.942018
			5.437	1.32923			3.129	0.764974				4.572	1.13544			10.807	2.68388				3.734	0.851521			0.986	0.224853											66.99	1.12792			12.055	0.202973				41.733	0.971825
			3.785	0.925352			7.373	1.80254				3.418	0.848847			2.649	0.657869				3.527	0.804316			2.147	0.489613											51.845	0.872925			27.654	0.465616				38.389	0.893954
			3.269	0.799201			5.487	1.34145				4.516	1.12153			3.043	0.755717				3.617	0.82484			1.887	0.430322											55.378	0.932411			25.828	0.434871				41.398	0.964023
			3.223	0.787955			4.159	1.01679				4.575	1.13618			3.857	0.95787				2.536	0.578323			2.096	0.477983											50.044	0.842601			22.41	0.377322				54.1	1.25981
			3.976	0.972047			11.355	2.77605				4.236	1.05199			8.76	2.17551				3.722	0.848785			2.171	0.495086											66.586	1.12112			27.965	0.470853				42.263	0.984166
			4.482	1.09575			13.295	3.25034				4.429	1.09992			1.84	0.456957				2.217	0.505577			1.78	0.405921											71.345	1.20125			26.731	0.450075				44.704	1.04101
			3.197	0.781598			8.74	2.13674				3.257	0.808863			12.336	3.0636				2.831	0.645596			1.538	0.350734											56.829	0.956842			28.061	0.472469				28.205	0.656802
			4.261	1.04172			6.779	1.65732				4.342	1.07832			7.359	1.82758				2.37	0.540468			1.639	0.373766											58.438	0.983933			27.142	0.456996				44.044	1.02564
			4.767	1.16543			6.007	1.46858				4.189	1.04032			4.566	1.13395				2.184	0.498051			1.633	0.372398											67.337	1.13377			21.001	0.353598				39.486	0.919499
			1.717	0.41977			6.414	1.56809				5.427	1.34777			3.972	0.98643				2.735	0.623704			1.624	0.370346											36.354	0.6121			26.201	0.441152				57.518	1.33941
			3.567	0.872055			6.798	1.66197				4.135	1.02691			8.166	2.02799				2.922	0.666349			0.934	0.212994											51.496	0.867049			28.508	0.479995				48.153	1.12133
			3.718	0.908972			24.316	5.94474				0.89	0.221028			8.482	2.10647				2.984	0.680487			1.906	0.434654											52.725	0.887742			29.795	0.501665				9.411	0.219151
			0.602	0.147176			5.353	1.30869				3.818	0.948185			10.965	2.72311				3.707	0.845364			1.394	0.317895											12.962	0.218244			34.803	0.585985				39.182	0.91242
			4.375	1.06959			8.621	2.10765				4.787	1.18883			2.2	0.546361				2.278	0.519487			1.845	0.420744											63.23	1.06462			33.377	0.561976				50.883	1.1849
			4.539	1.10969			10.335	2.52669				3.578	0.888582			3.228	0.801661				2.28	0.519943			1.213	0.276619											58.932	0.992251			24.775	0.417142				42.078	0.979858
			4.401	1.07595			8.003	1.95656				0.549	0.136342			3.038	0.754475				2.159	0.49235			0.941	0.214591											60.662	1.02138			32.365	0.544936				5.443	0.12675
			4.347	1.06275			2.771	0.67745				3.417	0.848598			3.409	0.846611				1.906	0.434654			0.587	0.133863											62.857	1.05834			17.202	0.289634				39.158	0.911861
			4.38	1.07082			8.672	2.12012				3.735	0.927572			2.689	0.667802				2.116	0.482544			0.662	0.150966											70.817	1.19236			34.927	0.588073				40.978	0.954243
			0.757	0.18507			4.374	1.06935				4.759	1.18188			3.097	0.769128				2.964	0.675926			0.792	0.180612											11.253	0.189469			26.136	0.440057				49.942	1.16299
			4.259	1.04123			4.1	1.00236				4.838	1.2015			3.192	0.79272				1.751	0.399307			0.981	0.223713											60.812	1.0239			30.815	0.518839				48.739	1.13497
			0.603	0.147421			3.87	0.946132				4.609	1.14463			2.313	0.574424				3.603	0.821647			0.584	0.133178											6.848	0.115301			19.234	0.323847				50.041	1.16529
			4.093	1.00065			3.139	0.767418				5.589	1.38801			4.659	1.15704				1.01	0.230326			0.629	0.143441											61.424	1.03421			19.713	0.331912				58.306	1.35776
			3.708	0.906527			5	1.22239				4.265	1.0592			2.748	0.682455				2.262	0.515839			0.047	0.0107181											52.594	0.885536			21.437	0.360939				46.526	1.08344
			3.638	0.889413			7.814	1.91036				4.651	1.15506			3.352	0.832456				4.129	0.941599			0.649	0.148001											60.063	1.01129			20.322	0.342166				54.105	1.25993
			4.672	1.1422			4.149	1.01434				5.148	1.27849			3.097	0.769128				6.458	1.47272			0.476	0.10855											71.019	1.19576			25.027	0.421385				50.573	1.17768
			4.024	0.983782			5.327	1.30234				4.553	1.13072			3.134	0.778316				6.593	1.5035			0.765	0.174455											67.76	1.14089			37.262	0.627388				53.67	1.2498
			5.269	1.28816			11.189	2.73547				4.994	1.24024			8.116	2.01558				5.988	1.36554			0.703	0.160316											67.264	1.13254			33.243	0.559719				38.781	0.903082
			3.757	0.918506			7.207	1.76196				4.255	1.05671			3.038	0.754475				6.516	1.48594			0.45	0.10262											55.354	0.932007			28.27	0.475988				45.158	1.05158
			3.046	0.744682			0.544	0.132996				4.809	1.1943			2.519	0.625584				5.398	1.23099			0.641	0.146177											42.904	0.722384			3.205	0.0539633				57.653	1.34255
			5.545	1.35563			6.232	1.52359				5.099	1.26632			3.369	0.836678				5.858	1.33589			0.485	0.110602											80.495	1.35531			38.022	0.640184				53.528	1.24649
			3.589	0.877434			8.077	1.97465				5.356	1.33014			2.063	0.512338				5.759	1.31331			0.618	0.140932											49.898	0.840143			22.104	0.37217				44.542	1.03724
			4.184	1.0229			3.474	0.849319				3.32	0.824509			2.599	0.645451				5.254	1.19815			0.638	0.145493											54.788	0.922477			27.948	0.470566				39.858	0.928162
			0.628	0.153533			6.721	1.64314				4.67	1.15978			4.493	1.11582				5.498	1.25379			0.579	0.132038											16.59	0.279329			32.34	0.544515				54.029	1.25816
			2.678	0.654714			3.864	0.944665				0.848	0.210597			7.021	1.74364				4.645	1.05927			0.804	0.183348											33.751	0.568273			32.473	0.546755				10.956	0.255129
			4.328	1.0581			6.653	1.62652				1.264	0.313909			5.344	1.32716				4.998	1.13977			0.771	0.175823											64.614	1.08792			36.92	0.62163				13.315	0.310063
			3.764	0.920218			4.862	1.18866				4.288	1.06491			3.828	0.950668				5.336	1.21685			0.721	0.164421											55.678	0.937462			32.767	0.551705				42.713	0.994645
			3.965	0.969358			7.012	1.71428				0.94	0.233445			3.459	0.859029				4.412	1.00614			0.742	0.16921											60.137	1.01254			27.774	0.467637				10.278	0.239341
			2.56	0.625865			7.951	1.94385				4.036	1.00232			2.601	0.645948				5.363	1.22301			0.624	0.1423											46.272	0.779091			39.471	0.664582				40.566	0.944649
			4.422	1.08108			6.186	1.51234				5.371	1.33387			0.495	0.122931				4.584	1.04536			1.055	0.240588											70.655	1.18963			27.167	0.457417				62.691	1.45987
			4.302	1.05175			2.388	0.583815				4.271	1.06069			0.496	0.12318				5.185	1.18242			1.003	0.22873											52.644	0.886378			21.901	0.368752				40.473	0.942483
			4.439	1.08524			4.746	1.1603				4.935	1.22559			13.921	3.45722				4.591	1.04696			1.009	0.230098											63.544	1.0699			27.688	0.466189				47.574	1.10784
			4.501	1.1004			8.476	2.0722				5.477	1.36019			4.942	1.22733				5.117	1.16691			0.539	0.122916											71.978	1.21191			31.768	0.534885				58.494	1.36213
			3.551	0.868144			6.884	1.68299				3.665	0.910188			2.42	0.600997				4.507	1.0278			0.666	0.151878											55.958	0.942177			19.859	0.33437				44.733	1.04168
			3.801	0.929263			7.733	1.89055				4.805	1.1933			5.262	1.3068				4.328	0.98698			1.177	0.268409											57.104	0.961472			34.166	0.57526				51.462	1.19838
			5.482	1.34023			13.949	3.41023				6.361	1.57973			13.92	3.45698				4.88	1.11286			0.587	0.133863											84.624	1.42483			32.521	0.547563				65.782	1.53185
			4.583	1.12045			4.565	1.11604				3.096	0.768879			4.201	1.0433				4.424	1.00887			0.774	0.176507											67.473	1.13606			33.258	0.559972				35.051	0.816223
			5.251	1.28376			5.898	1.44193				4.285	1.06416			5.393	1.33933				5.042	1.1498			0.667	0.152106											64.153	1.08016			29.493	0.49658				45.74	1.06513
			3.778	0.92364			8.871	2.16877				4.377	1.08701			3.4	0.844376				2.945	0.671594			0.565	0.128846											61.484	1.03522			37.086	0.624425				49.177	1.14517
			1.265	0.309265			7.722	1.88786				4.932	1.22484			3.444	0.855304				4.828	1.101			0.778	0.177419											29.089	0.489778			35.334	0.594926				51.035	1.18844
			3.805	0.930241			5.96	1.45709				2.019	0.501411			8.11	2.01409				4.61	1.05129			0.972	0.22166											55.895	0.941116			39.924	0.672209				22.937	0.534127
			3.492	0.853719			8.887	2.17268				4.996	1.24074			8.151	2.02427				5.344	1.21867			0.64	0.145949											47.879	0.806149			31.76	0.53475				50.275	1.17074
			4.163	1.01776			3.932	0.96129				4.339	1.07757			4.478	1.11209				4.477	1.02096			0.71	0.161912											57.962	0.975918			31.651	0.532915				51.528	1.19992
			4.228	1.03366			3.381	0.826582				7.102	1.76375			3.692	0.916893				4.279	0.975806			1.511	0.344577											69.222	1.16551			26.997	0.454554				49.818	1.1601
			3.821	0.934153			6.586	1.61014				5.401	1.34132			9.409	2.33669				4.014	0.915374			1.011	0.230554											60.966	1.0265			36.158	0.6088				65.257	1.51962
			4.634	1.13291			5.249	1.28327				3.579	0.88883			3.997	0.992639				4.2	0.957791			0.676	0.154159											79.573	1.33979			26.862	0.452281				46.707	1.08765
			0.567	0.138619			4.071	0.995273				5.383	1.33685			4.173	1.03635				2.526	0.576043			0.594	0.135459											10.879	0.183172			19.048	0.320715				49.205	1.14582
			3.902	0.953956			4.686	1.14563				6.411	1.59215			3.595	0.892804				4.406	1.00477			0.681	0.155299											52.614	0.885873			32.291	0.54369				63.253	1.47295
			4.093	1.00065			8.151	1.99275				0.757	0.187998			6.396	1.58842				5.056	1.153			0.421	0.0960071											59.002	0.993429			28.403	0.478227				8.694	0.202455
			3.949	0.965446			0.543	0.132752				3.54	0.879145			3.278	0.814078				3.793	0.864976			0.619	0.14116											60.75	1.02286			3.031	0.0510336				37.103	0.864007
			3.368	0.823404			9.045	2.21131				4.854	1.20547			2.006	0.498182				3.83	0.873414			0.749	0.170806											57.961	0.975902			25.927	0.436538				57.896	1.34821
			4.215	1.03048			3.305	0.808002				2.999	0.74479			5.582	1.38627				4.346	0.991085			0.012	0.00273654											61.992	1.04377			32.322	0.544212				36.674	0.854017
			2.493	0.609485			3.769	0.92144				4.654	1.1558			1.742	0.432619				4.253	0.969877			0.66	0.15051											44.495	0.749172			25.767	0.433844				51.283	1.19421
			5.101	1.24709			7.583	1.85388				4.41	1.09521			3.577	0.888334				4.05	0.923584			0.723	0.164877											69.445	1.16926			32.575	0.548472				46.605	1.08528
			4.152	1.01508			1.598	0.390677				4.705	1.16847			5.554	1.37931				4.528	1.03259			0.693	0.158035											76.876	1.29438			8.553	0.144009				53.881	1.25471
			5.304	1.29671			3.551	0.868144				3.58	0.889079			6.325	1.57079				3.873	0.88322			0.84	0.191558											63.071	1.06194			26.763	0.450614				49.272	1.14738
			3.502	0.856164			4.519	1.1048				3.851	0.95638			2.527	0.62757				4.512	1.02894			0.598	0.136371											68.657	1.15599			26.552	0.447062				52.692	1.22702
			4.371	1.06862			7.113	1.73898				3.963	0.984195			2.434	0.604474				3.929	0.89599			0.795	0.181296											81.752	1.37648			25.893	0.435966				49.584	1.15465
			4.678	1.14367			3.322	0.812158				4.364	1.08378			5.207	1.29314				3.724	0.849241			0.758	0.172858											69.572	1.1714			35.729	0.601577				43.934	1.02308
			4.359	1.06568			1.595	0.389943				5.256	1.30531			6.614	1.64256				4.28	0.976034			0.726	0.165561											49.646	0.8359			18.96	0.319234				48.4	1.12708
			1.457	0.356205			12.561	3.0709				4.668	1.15928			5.205	1.29264				3.223	0.73499			0.818	0.186541											19.579	0.329656			39.222	0.660389				51.683	1.20353
			4.42	1.0806			15.411	3.76766				5.051	1.2544			2.627	0.652405				4.671	1.0652			0.829	0.18905											75.811	1.27645			37.06	0.623987				59.293	1.38074
			5.633	1.37715			12.282	3.00269				3.668	0.910933			3.013	0.748266				4.278	0.975578			2.873	0.655174											72.24	1.21632			30.231	0.509006				52.165	1.21475
			4.095	1.00114			33.59	8.21204				4.969	1.23403			2.704	0.671528				4.24	0.966912			2.404	0.548221											64.839	1.09171			32.537	0.547832				45.53	1.06024
			5.348	1.30747			8.882	2.17146				1.319	0.327568			6.372	1.58246				3.727	0.849925			0.468	0.106725											70.271	1.18317			47.949	0.807327				12.546	0.292155
			3.801	0.929263			10.981	2.68462				5.009	1.24397			3.174	0.78825				2.927	0.667489			0.856	0.195207											66.018	1.11156			42.787	0.720414				54.166	1.26135
			5.225	1.2774			14.022	3.42808				4.43	1.10017			3.216	0.798681				3.576	0.81549			0.507	0.115619											67.435	1.13542			25.066	0.422042				49.418	1.15078
			4.534	1.10847			5.865	1.43387				4.789	1.18933			8.045	1.99794				3.727	0.849925			0.856	0.195207											83.243	1.40158			27.43	0.461845				50.221	1.16948
			4.541	1.11018			5.555	1.35808				5.321	1.32145			4.656	1.1563				6.766	1.54295			0.543	0.123829											70.736	1.191			44.19	0.744036				65.081	1.51552
			4.002	0.978404			23.269	5.68877				3.718	0.92335			5.415	1.34479				3.773	0.860415			0.593	0.135231											58.523	0.985364			37.161	0.625688				39.561	0.921246
			4.48	1.09526			15.806	3.86423				5.298	1.31574			4.062	1.00878				3.573	0.814806			0.495	0.112882											72.748	1.22487			36.449	0.6137				55.132	1.28384
			4.149	1.01434			15.627	3.82047				4.75	1.17964			5.617	1.39496				3.183	0.725868			0.482	0.109918											62.555	1.05325			33.556	0.564989				57.55	1.34015
			4.982	1.21799			10.314	2.52155				4.813	1.19529			2.963	0.735849				4.408	1.00522			0.524	0.119496											71.44	1.20285			37.252	0.62722				45.539	1.06045
			5.321	1.30087			14.657	3.58332				5.501	1.36615			7.327	1.81963				3.167	0.72222			2.022	0.461108											81.292	1.36873			38.081	0.641178				57.389	1.3364
			5.15	1.25906			10.829	2.64746				4.56	1.13246			1.996	0.495699				3.284	0.748901			3.248	0.740691											71.794	1.20881			35.338	0.594993				60.348	1.40531
			5.998	1.46638			9.279	2.26852				5.135	1.27526			8.08	2.00664				4.201	0.958019			0.537	0.12246											79.087	1.3316			35.052	0.590178				56.886	1.32469
			4.595	1.12338			12.276	3.00122				4.343	1.07857			3.381	0.839658				4.554	1.03852			0.591	0.134775											62.511	1.05251			38.271	0.644377				58.735	1.36775
			6.088	1.48839			6.294	1.53875				4.048	1.0053			4.477	1.11185				4.084	0.931337			0.093	0.0212082											77.173	1.29938			35.537	0.598344				45.447	1.05831
			4.635	1.13316			10.423	2.5482				5.268	1.30829			3.65	0.906463				4.152	0.946844			1.715	0.391098											69.74	1.17423			28.702	0.483262				47.092	1.09662
			3.491	0.853475			4.354	1.06446				2.964	0.736098			3.183	0.790485				4.074	0.929057			0.539	0.122916											53.564	0.901868			32.115	0.540727				29.424	0.685188
			4.214	1.03023			17.177	4.19941				4.408	1.09471			4.729	1.17443				5.025	1.14593			0.628	0.143212											73.278	1.2338			27.938	0.470398				53.205	1.23897
			1.067	0.260859			16.468	4.02607				4.129	1.02542			3.402	0.844873				4.158	0.948213			0.393	0.0896218											31.23	0.525826			41.261	0.69472				45.156	1.05153
			5.298	1.29525			16.719	4.08744				3.336	0.828482			3.352	0.832456				6.742	1.53748			0.47	0.107181											64.428	1.08479			24.847	0.418354				44.589	1.03833
			5.554	1.35783			4.227	1.03341				3.945	0.979725			1.41	0.350168				5.366	1.22369			0.686	0.156439											65.566	1.10395			28.442	0.478884				40.343	0.939456
			4.485	1.09649			5.083	1.24268				4.657	1.15655			3.809	0.94595				3.356	0.76532			0.94	0.214363											73.922	1.24464			26.637	0.448493				45.943	1.06986
			4.286	1.04784			4.861	1.18841				5.653	1.4039			2.199	0.546113				3.275	0.746849			0.579	0.132038											67.163	1.13084			36.786	0.619374				64.638	1.50521
			3.873	0.946866			8.654	2.11572				6.628	1.64604			2.149	0.533696				4.183	0.953914			0.462	0.105357											65.508	1.10297			32.105	0.540559				54.307	1.26463
			4.915	1.20161			14.019	3.42735				6.104	1.5159			4.171	1.03585				4.247	0.968509			0.468	0.106725											60.617	1.02062			23.811	0.400911				58.415	1.36029
			3.449	0.843207			6.593	1.61185				4.879	1.21168			3.884	0.964576				4.682	1.06771			0.421	0.0960071											57.932	0.975413			39.701	0.668454				61.325	1.42806
			3.024	0.739303			7.912	1.93431				6.24	1.54968			7.647	1.8991				4.849	1.10579			0.556	0.126793											51.076	0.859977			20.988	0.353379				61.957	1.44278
			3.947	0.964957			12.209	2.98484				5.371	1.33387			1.514	0.375996				4.134	0.94274			0.507	0.115619											58.332	0.982148			25.695	0.432632				54.179	1.26165
			4.63	1.13194			13.206	3.22858				4.739	1.17691			0.56	0.139074				3.869	0.882308			0.527	0.12018											59.248	0.997571			32.287	0.543623				56.792	1.3225
			5.487	1.34145			4.358	1.06544				4.798	1.19156			5.418	1.34554				3.987	0.909217			0.631	0.143897											74.523	1.25476			37.726	0.635201				56.911	1.32527
			5.108	1.2488			8.848	2.16315				4.772	1.18511			4.965	1.23304				4.181	0.953458			0.672	0.153246											84.751	1.42697			34.183	0.575546				50.776	1.18241
			4.986	1.21897			2.23	0.545187				3.785	0.93999			5.472	1.35895				4.262	0.971929			0.74	0.168754											58.819	0.990348			14.992	0.252423				48.861	1.13781
			5.008	1.22435			10.315	2.5218				5.037	1.25092			7.938	1.97137				3.559	0.811613			1.081	0.246517											86.382	1.45443			28.944	0.487336				58.975	1.37333
			4.482	1.09575			8.727	2.13357				5.087	1.26334			4.373	1.08602				3.804	0.867485			0.333	0.0759391											75.815	1.27651			23.057	0.388216				59.014	1.37424
			4.444	1.08646			8.78	2.14652				4.181	1.03833			3.835	0.952407				3.773	0.860415			0.675	0.153931											71.063	1.1965			30.185	0.508231				52.535	1.22337
			3.799	0.928774			10.551	2.57949				6.027	1.49678			4.06	1.00828				3.898	0.888921			0.636	0.145037											45.686	0.769225			31.722	0.53411				63.619	1.48148
			4.096	1.00138			13.769	3.36623				4.909	1.21913			2.448	0.607951				4.111	0.937495			0.4	0.0912181											53.736	0.904764			31.688	0.533538				47.129	1.09748
			5.101	1.24709			8.754	2.14017				4.958	1.2313			1.664	0.413248				3.902	0.889833			0.621	0.141616											58.855	0.990954			31.648	0.532864				65.229	1.51897
			0.681	0.16649			5.335	1.30429				5.284	1.31226			21.72	5.39407				3.414	0.778547			1.068	0.243552											6.394	0.107657			33.834	0.56967				39.834	0.927603
			5.151	1.25931			10.699	2.61568				4.69	1.16474			3.606	0.895536				4.376	0.997927			2.107	0.480492											83.267	1.40198			23.171	0.390135				44.478	1.03575
			5.345	1.30674			14.492	3.54298				5.633	1.39893			1.766	0.438579				4.802	1.09507			0.729	0.166245											60.997	1.02702			32.824	0.552665				58.551	1.36346
			4.488	1.09722			5.061	1.23731				4.696	1.16623			2.7	0.670534				3.65	0.832366			0.406	0.0925864											68.008	1.14507			35.116	0.591256				49.249	1.14685
			6.014	1.47029			12.978	3.17284				4.28	1.06292			0.406	0.100828				5.392	1.22962			0.439	0.100112											63.777	1.07383			35.013	0.589521				57.326	1.33493
			5.287	1.29256			8.998	2.19982				6.117	1.51913			16.474	4.09125				3.458	0.788581			0.725	0.165333											81.647	1.37471			40.943	0.689366				74.342	1.73118
			5.078	1.24146			12.197	2.98191				4.806	1.19355			12.204	3.03081				3.847	0.877291			0.836	0.190646											77.077	1.29776			25.991	0.437616				49.732	1.15809
			4.265	1.0427			12.163	2.97359				5.134	1.27501			1.707	0.423927				5.074	1.1571			1.792	0.408657											68.354	1.15089			38.299	0.644848				62.663	1.45922
			5.172	1.26444			8.794	2.14995				4.319	1.07261			1.948	0.483778				3.418	0.779459			0.425	0.0969193											58.622	0.987031			30.034	0.505689				55.641	1.2957
			5.027	1.22899			5.546	1.35588				5.129	1.27377			9.113	2.26318				4.192	0.955966			0.707	0.161228											62.379	1.05029			36.579	0.615888				70.91	1.65126
			3.241	0.792355			5.84	1.42776				5.527	1.37261			2.504	0.621858				3.832	0.87387			0.395	0.0900779											52.797	0.888954			33.733	0.56797				53.184	1.23848
			4.68	1.14416			11.78	2.87996				5.752	1.42849			2.162	0.536924				4.78	1.09006			0.397	0.090534											75.926	1.27838			35.541	0.598411				53.573	1.24754
			4.44	1.08549			3.626	0.88648				3.888	0.965569			2.348	0.583116				3.237	0.738183			0.999	0.227817											71.103	1.19718			32.646	0.549668				52.293	1.21773
			4.643	1.13511			17.543	4.28889				5.513	1.36913			3.474	0.862754				4.124	0.940459			0.441	0.100568											58.45	0.984135			19.908	0.335195				64.326	1.49794
			3.809	0.931219			13.318	3.25597				4.449	1.10489			3.51	0.871694				3.434	0.783108			1.169	0.266585											62.685	1.05544			29.862	0.502793				60.091	1.39932
			4.184	1.0229			13.361	3.26648				4.581	1.13767			2.362	0.586593				5.098	1.16258			0.468	0.106725											54.894	0.924262			36.102	0.607857				51.91	1.20881
			0.642	0.156955			8.928	2.18271				5.318	1.3207			15.34	3.80963				4.089	0.932478			1.286	0.293266											16.311	0.274632			27.052	0.45548				65.261	1.51971
			3.167	0.774264			6.01	1.46932				5.212	1.29438			2.225	0.55257				3.598	0.820507			0.466	0.106269											45.102	0.759392			25.125	0.423035				53.498	1.24579
			3.475	0.849563			8.613	2.10569				5.775	1.4342			12.554	3.11774				6.585	1.50168			0.379	0.0864292											41.653	0.70132			28.334	0.477066				70.076	1.63184
			5.018	1.22679			16.156	3.9498				3.997	0.992639			21.263	5.28058				3.509	0.800211			0.42	0.0957791											76.038	1.28027			31.309	0.527156				49.595	1.1549
			3.891	0.951266			7.527	1.84019				4.679	1.16201			6.136	1.52385				3.216	0.733394			0.919	0.209574											54.699	0.920979			33.055	0.556554				62.171	1.44776
			4.002	0.978404			5.837	1.42702				4.444	1.10365			11.35	2.81873				4.022	0.917198			0.325	0.0741147											47.627	0.801906			33.165	0.558406				58.467	1.3615
			3.316	0.810691			5.712	1.39646				4.664	1.15829			2.682	0.666064				3.539	0.807053			0.457	0.104217											51.538	0.867756			28.059	0.472435				70.921	1.65152
			5.054	1.2356			7.289	1.782				6.102	1.51541			2.438	0.605468				4.621	1.0538			0.329	0.0750269											44.754	0.753533			31.426	0.529126				57.466	1.33819
			5.181	1.26664			4.007	0.979626				5.933	1.47344			3.846	0.955139				4.399	1.00317			0.339	0.0773074											58.38	0.982956			25.056	0.421873				72.282	1.68321
			3.831	0.936598			11.362	2.77777				5.622	1.3962			3.748	0.930801				3.237	0.738183			1.456	0.332034											51.381	0.865113			29.896	0.503365				66.085	1.5389
			1.073	0.262326			10.717	2.62008				5.755	1.42923			8.555	2.1246				3.968	0.904884			0.737	0.168069											19.614	0.330245			40.946	0.689416				73.031	1.70065
			4.969	1.21481			6.305	1.54144				5.134	1.27501			3.971	0.986182				3.884	0.885728			0.455	0.103761											83.892	1.41251			36.297	0.61114				46.279	1.07769
			5.223	1.27691			14.659	3.58381				5.819	1.44513			22.967	5.70376				3.418	0.779459			0.29	0.0661332											66.971	1.1276			30.975	0.521533				71.942	1.67529
			3.895	0.952244			31.414	7.68005				5.077	1.26085			3.953	0.981712				4.904	1.11833			0.505	0.115163											47.139	0.793689			25.516	0.429618				61.715	1.43714
			4.157	1.0163			6.704	1.63898				4.621	1.14761			3.843	0.954394				4.459	1.01685			0.881	0.200908											62.683	1.05541			27.651	0.465566				58.347	1.35871
			4.781	1.16885			8.875	2.16975				1.362	0.338247			5.69	1.41309				2.541	0.579463			0.39	0.0889377											55.15	0.928572			28.655	0.48247				8.39	0.195376
			4.81	1.17594			6.024	1.47274				5.375	1.33486			3.631	0.901744				4.342	0.990173			0.465	0.106041											90.238	1.51936			40.781	0.686638				75.818	1.76555
			3.798	0.92853			4.616	1.12851				5.746	1.427			5.666	1.40713				4.929	1.12404			1.097	0.250166											56.725	0.955091			32.516	0.547479				60.917	1.41856
			4.314	1.05468			7.283	1.78054				4.453	1.10588			4.772	1.18511				3.312	0.755286			0.407	0.0928145											60.204	1.01367			25.504	0.429416				71.005	1.65347
			4.193	1.0251			3.509	0.857876				3.847	0.955387			3.671	0.911678				4	0.912181			0.383	0.0873414											68.9	1.16008			41.417	0.697347				69.814	1.62574
			5.056	1.23608			5.974	1.46052				4.812	1.19504			3.163	0.785518				3.204	0.730657			0.454	0.103533											89.993	1.51523			25.334	0.426554				68.555	1.59642
			3.874	0.94711			7.738	1.89178				6.001	1.49032			13.321	3.30822				3.468	0.790861			1.21	0.275935											62.829	1.05787			28.674	0.48279				66.855	1.55683
			4.843	1.18401			7.215	1.76391				4.406	1.09421			5.521	1.37112				3.354	0.764864			0.724	0.165105											71.786	1.20868			24.159	0.40677				56.761	1.32178
			4.152	1.01508			4.11	1.00481				5.319	1.32095			22.336	5.54706				3.543	0.807965			1.513	0.345033											54.879	0.924009			23.075	0.388519				74.015	1.72357
			5.073	1.24024			6.088	1.48839				4.896	1.2159			12.11	3.00747				5.203	1.18652			0.155	0.035347											64.979	1.09407			22.326	0.375908				77.61	1.80728
			4.013	0.981093			4.294	1.04979				5.49	1.36342			7.671	1.90506				4.159	0.948441			0.567	0.129302											58.369	0.982771			40.478	0.681537				76.817	1.78882
			3.662	0.895281			6.362	1.55537				5.682	1.4111			9.062	2.25051				3.502	0.798615			0.5	0.114023											45.168	0.760503			31.822	0.535794				53.108	1.23671
			4.021	0.983049			5.304	1.29671				5.289	1.3135			8.833	2.19364				4.559	1.03966			1.47	0.335227											73.238	1.23312			20.457	0.344439				67.148	1.56366
			4.973	1.21579			6.963	1.7023				6.058	1.50448			3.038	0.754475				4.258	0.971017			0.257	0.0586077											76.794	1.293			27.425	0.461761				70.316	1.63743
			4.113	1.00554			2.841	0.694564				5.207	1.29314			5.044	1.25266				3.473	0.792002			1.232	0.280952											61.751	1.03971			28.32	0.47683				55.181	1.28498
			4.285	1.04759			9.756	2.38513				5.105	1.26781			2.307	0.572934				3.523	0.803404			0.714	0.162824											60.316	1.01555			27.528	0.463495				54.196	1.26205
			3.355	0.820226			8.591	2.10032				4.765	1.18337			17.65	4.38331				4.487	1.02324			1	0.228045											52.749	0.888146			26.927	0.453376				63.34	1.47498
			5.452	1.3329			6.191	1.51357				0.643	0.159686			5.173	1.28469				4.273	0.974438			0.649	0.148001											79.414	1.33711			43.257	0.728327				9.465	0.220409
			5.704	1.39451			4.613	1.12778				4.862	1.20746			4.792	1.19007				4.37	0.996558			0.868	0.197943											76.625	1.29015			24.913	0.419465				61.074	1.42221
			5.326	1.30209			5.388	1.31725				4.106	1.01971			25.202	6.25882				3.4	0.775354			0.765	0.174455											78.833	1.32733			27.31	0.459824				53.278	1.24067
			0.776	0.189715			1.782	0.435661				5.455	1.35473			2.709	0.672769				5.475	1.24855			0.046	0.0104901											12.342	0.207805			10.677	0.179771				79.656	1.85493
			5.637	1.37813			10.403	2.54331				3.355	0.833201			2.434	0.604474				3.706	0.845136			0.688	0.156895											78.157	1.31595			29.853	0.502641				53.318	1.2416
			4.534	1.10847			7.717	1.88664				5.24	1.30133			2.197	0.545616				4.54	1.03533			0.652	0.148686											69.554	1.1711			29.048	0.489087				64.314	1.49766
			3.445	0.842229			7.103	1.73653				5.128	1.27352			10.666	2.64886				4.853	1.1067			0.108	0.0246289											45.603	0.767827			27.706	0.466492				77.326	1.80067
			4.113	1.00554			6.51	1.59156				4.876	1.21094			5.728	1.42253				4.054	0.924496			0.355	0.0809561											64.707	1.08949			35.511	0.597906				78.71	1.8329
			4.711	1.15174			8.948	2.18759				4.729	1.17443			5.93	1.47269				3.942	0.898955			0.778	0.177419											75.301	1.26786			31.491	0.530221				61.679	1.4363
			4.623	1.13022			7.681	1.87784				5.417	1.34529			3.276	0.813581				3.741	0.853118			0.828	0.188822											70.543	1.18775			28.969	0.487757				72.311	1.68389
			3.901	0.953711			0.383	0.0936353				5.395	1.33983			4.681	1.16251				3.846	0.877062			0.972	0.22166											57.932	0.975413			3.732	0.0628365				82.917	1.93086
			3.065	0.749327			34.31	8.38806				4.441	1.1029			6.89	1.7111				4.003	0.912866			0.636	0.145037											50.777	0.854943			31.263	0.526382				56.079	1.3059
			4.677	1.14343			9.106	2.22622				5.341	1.32642			5.895	1.464				5.082	1.15893			0.263	0.0599759											78.201	1.31669			44.765	0.753718				52.003	1.21098
			4.037	0.98696			6.805	1.66368				5.119	1.27128			5.486	1.36243				3.658	0.83419			1.064	0.24264											54.933	0.924919			36.746	0.6187				68.16	1.58722
			5.16	1.26151			7.287	1.78152				4.159	1.03287			3.787	0.940486				4.065	0.927004			0.467	0.106497											70.416	1.18561			45.868	0.772289				52.423	1.22076
			0.632	0.15451			7.389	1.80645				0.614	0.152484			7.124	1.76922				3.655	0.833506			0.864	0.197031											16.55	0.278656			37.51	0.631564				7.64	0.177911
			3.733	0.912639			5.09	1.2444				5.168	1.28345			6.448	1.60133				5.636	1.28526			1.025	0.233747											56.188	0.946049			32.824	0.552665				55.229	1.2861
			4.62	1.12949			13.031	3.1858				4.313	1.07112			3.02	0.750005				5.087	1.16007			1.37	0.312422											66.349	1.11713			31.61	0.532224				47.092	1.09662
			4.977	1.21677			6.055	1.48032				4.329	1.07509			2.924	0.726164				3.785	0.863152			0.943	0.215047											63.254	1.06502			18.288	0.307919				58.951	1.37278
			3.743	0.915084			6.137	1.50037				3.764	0.934774			4.235	1.05175				5.585	1.27363			0.756	0.172402											60.791	1.02355			31.423	0.529076				44.544	1.03728
			0.761	0.186048			10.641	2.6015				4.632	1.15034			14.548	3.61294				3.504	0.799071			0.928	0.211626											18.305	0.308205			26.065	0.438862				58.012	1.35091
			4.869	1.19037			27.765	6.78795				4.525	1.12377			4.467	1.10936				5.428	1.23783			1.261	0.287565											74.323	1.25139			34.522	0.581254				54.747	1.27488
			2.828	0.691386			4.13	1.0097				4.323	1.0736			3.397	0.843631				4.291	0.978543			0.841	0.191786											56.904	0.958105			33.113	0.557531				48.41	1.12731
			4.317	1.05541			6.114	1.49474				5.852	1.45332			2.733	0.67873				4.237	0.966228			1.003	0.22873											55.575	0.935728			35.084	0.590717				63.707	1.48353
			4.386	1.07228			4.773	1.1669				3.892	0.966563			4.033	1.00158				5.57	1.27021			1.464	0.333858											58.839	0.990685			21.554	0.362909				48.27	1.12405
			5.515	1.3483			3.214	0.785754				5.129	1.27377			3.83	0.951165				4.225	0.963492			0.174	0.0396799											83.036	1.39809			19.588	0.329807				56.799	1.32266
			6.549	1.60109			4.792	1.17154				4.427	1.09943			9.071	2.25275				3.853	0.878659			0.12	0.0273654											76.62	1.29007			40.755	0.686201				53.526	1.24644
			4.149	1.01434			6.712	1.64094				4.796	1.19107			11.182	2.777				3.812	0.869309			0.706	0.161											64.78	1.09071			43	0.724				57.087	1.32937
			1.394	0.340803			8.598	2.10203				4.727	1.17393			3.507	0.870949				5.421	1.23623			1.857	0.42348											26.239	0.441792			32.759	0.55157				69.554	1.61968
			4.501	1.1004			9.323	2.27927				4.881	1.21218			2.709	0.672769				4.178	0.952774			1.115	0.254271											80.574	1.35664			36.81	0.619778				64.433	1.50043
			4.83	1.18083			7.132	1.74362				3.279	0.814327			9.846	2.44521				3.884	0.885728			1.069	0.24378											71.338	1.20113			19.97	0.336239				35.15	0.818528
			3.744	0.915328			4.731	1.15663				4.655	1.15605			0.46	0.114239				3.529	0.804772			0.91	0.207521											68.042	1.14564			17.599	0.296318				62.304	1.45086
			4.352	1.06397			19.886	4.8617				5.764	1.43147			2.099	0.521278				7.403	1.68822			0.955	0.217783											72.592	1.22225			52.58	0.885301				55.969	1.30333
			0.611	0.149376			10.597	2.59074				3.951	0.981215			6.203	1.54049				5.442	1.24102			0.513	0.116987											12.746	0.214607			38.35	0.645707				55.956	1.30303
			3.616	0.884035			9.127	2.23136				5.162	1.28196			9.979	2.47824				3.95	0.900779			0.467	0.106497											54.781	0.922359			34.364	0.578594				65.195	1.51818
			4.823	1.17912			11.546	2.82275				5.378	1.3356			4.186	1.03958				3.937	0.897815			0.918	0.209346											71.713	1.20745			26.074	0.439013				50.914	1.18562
			5.021	1.22753			29.697	7.26028				4.732	1.17517			3.193	0.792969				3.819	0.870905			1.037	0.236483											67.233	1.13202			30.08	0.506463				59.863	1.39401
			3.826	0.935375			11.241	2.74818				4.463	1.10837			17.418	4.32569				3.817	0.870449			1.165	0.265673											56.379	0.949265			34.661	0.583595				54.65	1.27262
			4.527	1.10675			5.387	1.31701				4.911	1.21963			2.251	0.559027				3.665	0.835786			0.831	0.189506											81.022	1.36418			27.073	0.455834				64.424	1.50022
			4.386	1.07228			10.075	2.46312				4.623	1.1481			7.875	1.95572				4.801	1.09485			0.736	0.167841											67.594	1.13809			29.47	0.496193				60.927	1.41879
			4.366	1.06739			6.054	1.48007				4.445	1.1039			8.525	2.11715				2.08	0.474334			1.048	0.238992											61.787	1.04032			32.995	0.555544				54.444	1.26782
			4.901	1.19819			6.447	1.57615				4.522	1.12302			6.069	1.50721				3.983	0.908305			3.851	0.878203											59.845	1.00762			39.562	0.666114				60.485	1.4085
			0.462	0.112949			22.085	5.39931				4.125	1.02443			9.449	2.34662				4.393	1.0018			0.823	0.187681											5.802	0.0976895			27.251	0.458831				54.836	1.27695
			4.583	1.12045			7.957	1.94532				4.465	1.10886			3.421	0.849592				4.289	0.978087			3.52	0.80272											68.629	1.15552			36.7	0.617926				65.683	1.52954
			0.913	0.223209			5.836	1.42678				4.227	1.04976			3.901	0.968798				4.199	0.957563			0.612	0.139564											12.982	0.218581			43.255	0.728294				54.708	1.27397
			5.17	1.26395			8.418	2.05802				4.827	1.19877			18.541	4.60458				4.086	0.931793			0.825	0.188137											71.086	1.19689			15.361	0.258636				53.21	1.23909
			4.411	1.0784			8.036	1.96463				5.152	1.27948			4.009	0.995619				4.131	0.942055			0.822	0.187453											63.529	1.06965			27.012	0.454807				51.601	1.20162
			4.824	1.17936			12.819	3.13397				4.606	1.14388			21.671	5.38191				3.75	0.85517			1.482	0.337963											68.848	1.15921			39.295	0.661618				53.855	1.25411
			5.356	1.30943			7.226	1.7666				4.026	0.999841			8.608	2.13776				4.024	0.917655			0.645	0.147089											75.34	1.26852			30.623	0.515606				43.526	1.01358
			4.972	1.21555			5.635	1.37764				5.009	1.24397			1.815	0.450748				6.205	1.41502			0.401	0.0914462											68.765	1.15781			34.621	0.582921				59.601	1.38791
			3.608	0.882079			10.719	2.62057				5.556	1.37981			22.929	5.69433				4.066	0.927232			0.859	0.195891											58.713	0.988563			34.718	0.584554				60.844	1.41686
			0.919	0.224676			13.672	3.34251				4.352	1.0808			4.271	1.06069				3.808	0.868397			2.317	0.528381											12.208	0.205549			36.621	0.616596				45.293	1.05473
			0.682	0.166734			4.39	1.07326				2.845	0.706544			2.13	0.528977				3.941	0.898727			1.114	0.254043											20.373	0.343024			27.131	0.45681				41.99	0.977809
			0.627	0.153288			8.803	2.15215				5.508	1.36789			6.605	1.64033				5.072	1.15665			0.728	0.166017											14.22	0.239425			29.718	0.500368				76.759	1.78747
			0.754	0.184337			11.646	2.8472				4.411	1.09545			5.924	1.4712				3.967	0.904656			1.258	0.286881											18.332	0.30866			33.364	0.561757				50.642	1.17929
			3.309	0.80898			20.686	5.05729				5.245	1.30257			4.243	1.05373				3.869	0.882308			1.192	0.27183											45.674	0.769023			21.75	0.366209				67.859	1.58021
			4.466	1.09184			9.312	2.27659				5.236	1.30034			3.255	0.808366				4.304	0.981507			1.255	0.286197											63.813	1.07443			26.898	0.452887				53.783	1.25243
			4.275	1.04515			10.461	2.55749				4.566	1.13395			3.277	0.81383				5.468	1.24695			1.316	0.300108											75.324	1.26825			28.36	0.477503				55.874	1.30112
			3.718	0.908972			10.253	2.50664				4.209	1.04529			3.43	0.851827				4.331	0.987664			1.058	0.241272											53.152	0.894931			22.501	0.378854				57.008	1.32753
			2.672	0.653247			9.246	2.26045				4.736	1.17617			1.743	0.432867				5.01	1.14251			0.889	0.202732											53.104	0.894123			37.956	0.639073				48.079	1.1196
			4.406	1.07717			9.045	2.21131				4.609	1.14463			3.637	0.903234				4.02	0.916742			1.322	0.301476											56.451	0.950477			30.61	0.515387				53.508	1.24603
			4.126	1.00872			15.467	3.78135				3.712	0.92186			3.042	0.755469				4.405	1.00454			0.801	0.182664											55.531	0.934987			27.899	0.469741				36.358	0.846658
			3.516	0.859587			8.945	2.18686				4.909	1.21913			3.741	0.929062				4.376	0.997927			2.969	0.677067											52.138	0.877859			31.603	0.532106				56.373	1.31274
			3.709	0.906771			16.607	4.06006				3.384	0.840403			12.292	3.05267				4.399	1.00317			0.436	0.0994278											59.584	1.00323			28.627	0.481999				40.261	0.937546
			4.86	1.18817			7.624	1.86391				3.562	0.884608			11.167	2.77328				4.609	1.05106			1.141	0.2602											77.226	1.30027			24.696	0.415812				38.146	0.888295
			4.717	1.15321			5.081	1.2422				3.737	0.928069			2.091	0.519291				4.288	0.977859			0.99	0.225765											66.979	1.12774			34.631	0.583089				50.504	1.17607
			4.095	1.00114			9.539	2.33208				4.195	1.04181			4.031	1.00108				5.211	1.18834			1.438	0.327929											54.962	0.925407			37.501	0.631412				46.67	1.08679
			4.709	1.15125			15.06	3.68185				4.505	1.1188			4.614	1.14587				4.357	0.993594			0.569	0.129758											67.422	1.1352			19.941	0.335751				48.816	1.13676
			0.981	0.239834			9.708	2.3734				4.417	1.09694			8.186	2.03296				4.093	0.93339			1.532	0.349366											12.42	0.209118			25.58	0.430696				56.558	1.31705
			3.797	0.928285			11.089	2.71102				4.809	1.1943			4.464	1.10862				4.701	1.07204			0.689	0.157123											70.705	1.19048			33.498	0.564013				53.465	1.24502
			3.831	0.936598			14.588	3.56645				5.824	1.44637			6.198	1.53925				4.888	1.11469			2.631	0.599987											62.544	1.05307			19.835	0.333966				63.058	1.46841
			3.401	0.831472			9.086	2.22133				4.816	1.19603			11.245	2.79265				4.433	1.01093			2.419	0.551642											47.02	0.791686			30.059	0.50611				55.411	1.29034
			5.024	1.22826			9.766	2.38758				1.021	0.253561			5.659	1.40539				5.05	1.15163			0.958	0.218467											85.994	1.4479			30.507	0.513653				13.489	0.314115
			4.483	1.096			11.132	2.72154				5.134	1.27501			3.66	0.908946				4.297	0.979911			1.053	0.240132											69.205	1.16522			21.646	0.364458				54.822	1.27662
			3.134	0.766196			7.657	1.87197				4.733	1.17542			7.259	1.80274				4.347	0.991313			0.849	0.193611											56.471	0.950814			31.036	0.52256				52.394	1.22008
			3.568	0.8723			5.234	1.2796				5.826	1.44686			3.017	0.74926				5.053	1.15231			0.748	0.170578											59.284	0.998177			39.074	0.657897				61.241	1.4261
			4.206	1.02828			14.911	3.64542				3.817	0.947937			3.692	0.916893				4.204	0.958703			1.594	0.363504											61.71	1.03902			24.586	0.41396				50.795	1.18285
			4.927	1.20455			6.128	1.49817				4.495	1.11632			4.427	1.09943				4.504	1.02712			0.962	0.21938											77.11	1.29832			32.593	0.548775				54.01	1.25772
			4.849	1.18548			6.403	1.5654				5.048	1.25365			3.824	0.949675				4.791	1.09257			0.968	0.220748											76.617	1.29002			22.683	0.381918				57.649	1.34246
			4.871	1.19086			11.738	2.86969				3.342	0.829972			3.734	0.927324				4.442	1.01298			3.267	0.745024											64.48	1.08566			28.807	0.48503				51.997	1.21084
			5.22	1.27618			5.625	1.37519				4.738	1.17666			12.394	3.078				4.621	1.0538			1.062	0.242184											74.407	1.25281			28.055	0.472368				62.471	1.45474
			5.366	1.31187			18.195	4.44829				5.247	1.30307			6.914	1.71706				4.47	1.01936			0.086	0.0196119											86.649	1.45893			24.918	0.41955				66.453	1.54747
			2.377	0.581126			8.053	1.96879				3.564	0.885105			3.628	0.900999				3.906	0.890745			0.65	0.148229											26.886	0.452685			25.365	0.427076				55.635	1.29556
			0.758	0.185315			5.112	1.24977				4.112	1.0212			4.184	1.03908				4.388	1.00066			0.042	0.00957791											17.456	0.29391			28.961	0.487622				44.289	1.03135
			3.822	0.934397			7.434	1.81745				3.73	0.926331			3.272	0.812588				4.588	1.04627			0.261	0.0595198											63.337	1.06642			29.677	0.499678				52.538	1.22344
			2.351	0.574769			9.927	2.42694				6.427	1.59612			2.488	0.617885				4.846	1.10511			0.88	0.20068											32.698	0.550543			32.974	0.55519				51.071	1.18928
			3.62	0.885013			10.541	2.57705				3.894	0.967059			6.977	1.73271				3.813	0.869537			1.047	0.238764											54.874	0.923925			29.369	0.494492				44.707	1.04108
			4.37	1.06837			7.911	1.93407				4.232	1.051			3.496	0.868218				4.857	1.10762			0.073	0.0166473											66.025	1.11168			31.777	0.535036				42.493	0.989522
			5.508	1.34659			16.116	3.94002				4.708	1.16921			3.323	0.825254				5.374	1.22552			1.119	0.255183											85.608	1.4414			22.988	0.387054				39.11	0.910743
			4.008	0.97987			6.811	1.66514				4.454	1.10613			4.12	1.02319				3.785	0.863152			1.156	0.26362											53.355	0.898349			27.986	0.471206				47.171	1.09846
			4.459	1.09013			1.579	0.386032				4.525	1.12377			6.129	1.52211				6.312	1.43942			0.791	0.180384											68.59	1.15486			7.872	0.132543				48.049	1.1189
			6.393	1.56295			6.835	1.67101				4.348	1.07981			5.92	1.47021				4.694	1.07044			1.02	0.232606											83.808	1.41109			31.246	0.526095				51.842	1.20723
			4.064	0.993561			15.423	3.77059				5.228	1.29835			3.651	0.906711				4.869	1.11035			0.991	0.225993											71.158	1.1981			28.993	0.488161				57.794	1.34583
			4.968	1.21457			7.961	1.94629				3.914	0.972026			5.956	1.47915				4.398	1.00294			2.058	0.469317											58.126	0.97868			22.841	0.384579				46.652	1.08637
			4.654	1.1378			6.719	1.64265				4.846	1.20348			3.023	0.75075				4.453	1.01549			0.385	0.0877975											61.378	1.03343			29.41	0.495182				51.681	1.20348
			4.509	1.10235			7.02	1.71624				3.873	0.961844			4.763	1.18287				4.879	1.11263			1.282	0.292354											52.64	0.886311			20.168	0.339573				44.704	1.04101
			0.903	0.220764			8.114	1.9837				4.462	1.10812			3.698	0.918383				5.556	1.26702			1.68	0.383116											10.114	0.170292			18.406	0.309906				52.433	1.22099
			3.64	0.889902			7.167	1.75218				3.737	0.928069			5.008	1.24372				4.471	1.01959			1.351	0.308089											63.328	1.06627			26.041	0.438458				48.028	1.11841
			4.255	1.04026			6.952	1.69962				5.09	1.26408			4.15	1.03064				4.258	0.971017			0.065	0.0148229											59.767	1.00631			29.475	0.496277				39.613	0.922457
			4.492	1.0982			9.375	2.29199				4.726	1.17368			4.991	1.23949				5.332	1.21594			0.684	0.155983											64.407	1.08443			31.378	0.528318				53.284	1.24081
			5.172	1.26444			13.272	3.24472				3.662	0.909443			2.186	0.542884				4.746	1.0823			1	0.228045											78.018	1.31361			22.669	0.381683				42.731	0.995065
			4.658	1.13878			3.78	0.924129				4.592	1.1404			4.332	1.07583				5.946	1.35596			0.182	0.0415043											61.822	1.04091			21.151	0.356124				47.76	1.11217
			3.806	0.930486			7.23	1.76758				4.098	1.01772			5.282	1.31176				5.452	1.2433			0.744	0.169666											56.663	0.954047			24.21	0.407629				43.077	1.00312
			4.92	1.20283			12.464	3.04718				4.942	1.22733			4.46	1.10762				4.608	1.05083			0.069	0.0157351											72.143	1.21469			24.255	0.408387				55.119	1.28354
			5.14	1.25662			6.075	1.48521				4.651	1.15506			8.095	2.01036				5.619	1.28139			1.257	0.286653											61.869	1.0417			31.973	0.538336				55.976	1.3035
			5.471	1.33754			10.288	2.5152				4.011	0.996116			5.367	1.33287				5.104	1.16394			1.188	0.270918											83.808	1.41109			25.436	0.428271				58.075	1.35238
			4.887	1.19477			6.295	1.53899				1.246	0.309439			6.086	1.51143				5.38	1.22688			0.057	0.0129986											67.651	1.13905			27.536	0.463629				10.051	0.234055
			0.792	0.193627			9.079	2.21962				4.667	1.15903			5.769	1.43271				5.622	1.28207			0.941	0.214591											16.627	0.279952			27.163	0.457349				54.92	1.27891
			4.419	1.08035			8.082	1.97588				3.841	0.953897			2.392	0.594044				6.764	1.5425			1.37	0.312422											61.304	1.03219			30.597	0.515168				46.247	1.07694
			3.58	0.875234			7.463	1.82454				3.34	0.829476			2.84	0.705303				5.903	1.34615			0.319	0.0727465											54.319	0.91458			22.014	0.370654				36.146	0.841722
			4.469	1.09258			9.857	2.40983				3.863	0.959361			8.894	2.20879				6.323	1.44193			0.787	0.179472											52.702	0.887355			24.689	0.415694				38.011	0.885151
			4.395	1.07448			8.29	2.02673				3.306	0.821032			6.654	1.65249				5.6	1.27705			1.127	0.257007											66.791	1.12457			22.073	0.371648				37.154	0.865195
			5.609	1.37128			4.836	1.1823				4.026	0.999841			3.201	0.794956				5.772	1.31628			0.86	0.196119											85.053	1.43206			29.143	0.490687				41.946	0.976785
			4.998	1.2219			10.842	2.65064				3.615	0.897771			4.42	1.09769				5.603	1.27774			1.258	0.286881											72.751	1.22492			27.316	0.459925				44.786	1.04292
			5.035	1.23095			5.423	1.32581				4.952	1.22981			4.059	1.00804				4.831	1.10169			1.263	0.288021											72.079	1.21361			25.292	0.425847				51.864	1.20774
			4.003	0.978648			8.421	2.05875				3.882	0.964079			8.719	2.16533				4.652	1.06087			1.213	0.276619											57.67	0.971002			25.968	0.437229				53.555	1.24712
			3.771	0.921929			4.818	1.1779				4.405	1.09396			5.076	1.2606				5.099	1.1628			0.997	0.227361											58.583	0.986374			23.037	0.387879				45.014	1.04823
			3.62	0.885013			9.635	2.35555				3.416	0.84835			7.868	1.95399				6.372	1.45311			0.908	0.207065											55.427	0.933236			23.919	0.402729				41.526	0.967004
			5.22	1.27618			11.297	2.76188				4.061	1.00853			4.822	1.19752				5.857	1.33566			0.733	0.167157											66.364	1.11738			23.182	0.39032				42.934	0.999792
			3.717	0.908727			12.141	2.96822				3.129	0.777075			4.921	1.22211				5.397	1.23076			0.662	0.150966											65.358	1.10045			20.429	0.343967				39.866	0.928348
			3.305	0.808002			13.583	3.32075				5.571	1.38354			3.184	0.790734				5.109	1.16508			0.336	0.0766232											56.491	0.951151			27.786	0.467839				60.775	1.41525
			4.658	1.13878			6.344	1.55097				1.601	0.397602			1.98	0.491725				3.782	0.862468			1.007	0.229642											78.951	1.32931			25.408	0.4278				18.914	0.440445
			4.536	1.10896			6.013	1.47005				2.797	0.694624			5.733	1.42377				4.855	1.10716			1.455	0.331806											71.812	1.20911			31.374	0.528251				30.937	0.720421
			4.001	0.978159			10.1	2.46923				4.394	1.09123			4.014	0.996861				6.788	1.54797			0.036	0.00820963											67.478	1.13614			21.465	0.361411				52.576	1.22432
			4.204	1.02779			9.044	2.21106				4.895	1.21565			3.48	0.864244				5.789	1.32015			0.049	0.0111742											51.062	0.859742			27.877	0.469371				44.654	1.03985
			5.136	1.25564			6.554	1.60231				3.928	0.975503			1.889	0.469126				6.317	1.44056			0.768	0.175139											68.217	1.14858			27.109	0.45644				43.169	1.00526
			2.526	0.617553			6.152	1.50403				3.575	0.887837			6.566	1.63064				6.376	1.45402			0.048	0.0109462											41.169	0.693171			28.834	0.485484				42.743	0.995344
			4.24	1.03659			3.714	0.907994				0.88	0.218544			2.867	0.712008				5.664	1.29165			0.094	0.0214363											69.111	1.16364			22.403	0.377204				4.341	0.101088
			4.347	1.06275			4.788	1.17056				3.459	0.859029			2.338	0.580633				5.903	1.34615			0.09	0.0205241											67.071	1.12929			29.362	0.494374				44.473	1.03563
			4.248	1.03855			5.901	1.44267				5.242	1.30183			7.193	1.78635				5.769	1.31559			1.193	0.272058											63.484	1.06889			22.238	0.374426				48.366	1.12629
			4.629	1.13169			11.889	2.90661				3.524	0.875171			4.676	1.16127				6.078	1.38606			0.224	0.0510822											59.047	0.994187			20.286	0.34156				37.903	0.882636
			5.611	1.37177			7.816	1.91085				4.311	1.07062			10.664	2.64836				7.322	1.66975			0.706	0.161											90.797	1.52877			24.133	0.406332				42.505	0.989802
			3.307	0.808491			5.493	1.34292				3.118	0.774343			3.649	0.906215				4.942	1.127			0.82	0.186997											56.09	0.944399			23.763	0.400103				36.584	0.851921
			0.624	0.152555			6.501	1.58936				4.474	1.1111			2.171	0.539159				5.664	1.29165			0.054	0.0123144											7.667	0.129091			21.648	0.364492				48.191	1.12221
			4.86	1.18817			7.941	1.9414				5.108	1.26855			6.694	1.66243				5.106	1.1644			0.474	0.108094											59.799	1.00685			19.809	0.333528				43.603	1.01537
			5.518	1.34903			5.433	1.32825				3.248	0.806628			0.949	0.23568				5.852	1.33452			0.349	0.0795878											92.738	1.56145			28.082	0.472823				35.278	0.821509
			5.392	1.31823			12.144	2.96895				5.107	1.2683			11.249	2.79364				7.944	1.81159			0.134	0.0305581											86.905	1.46324			20.737	0.349153				58.206	1.35543
			0.953	0.232988			8.173	1.99812				3.699	0.918632			5.793	1.43867				5.49	1.25197			0.393	0.0896218											13.536	0.227908			23.439	0.394647				42.66	0.993411
			3.783	0.924863			10.517	2.57118				4.832	1.20001			7.996	1.98577				6.708	1.52973			1.248	0.284601											75.403	1.26958			23.573	0.396904				56.573	1.3174
			4.76	1.16372			14.927	3.64933				3.934	0.976993			9.606	2.38561				5.593	1.27546			1.038	0.236711											63.263	1.06517			21.703	0.365418				42.365	0.986542
			3.294	0.805313			0.356	0.0870344				3.4	0.844376			4.31	1.07037				6.091	1.38902			1.69	0.385397											56.447	0.95041			2.048	0.0344826				38.801	0.903548
			4.418	1.08011			20.621	5.04139				4.002	0.993881			3.652	0.90696				5.401	1.23167			0.886	0.202048											60.741	1.02271			15.845	0.266786				43.602	1.01535
			4.027	0.984515			21.418	5.23624				3.24	0.804641			12.075	2.99878				5.582	1.27295			1.222	0.278671											75.664	1.27397			15.706	0.264445				37.639	0.876489
			4.637	1.13365			8.564	2.09372				4.357	1.08204			3.368	0.836429				5.657	1.29005			0.873	0.199084											82.478	1.3887			27.427	0.461794				51.351	1.1958
			4.391	1.07351			5.256	1.28498				3.251	0.807373			7.027	1.74513				7.521	1.71513			0.933	0.212766											80.105	1.34874			14.975	0.252137				41.931	0.976435
			4.29	1.04881			18.801	4.59644				4.873	1.21019			18.41	4.57205				5.654	1.28937			0.74	0.168754											69.635	1.17246			28.315	0.476746				47.592	1.10826
			3.222	0.78771			7.906	1.93285				3.73	0.926331			5.32	1.3212				5.084	1.15938			0.797	0.181752											51.266	0.863176			21.661	0.364711				46.164	1.07501
			3.673	0.89797			3.378	0.825849				3.949	0.980718			6.905	1.71483				5.587	1.27409			1.168	0.266357											54.519	0.917948			16.732	0.28172				35.205	0.819809
			5.17	1.26395			6.594	1.61209				5.513	1.36913			6.433	1.59761				5.671	1.29325			1.064	0.24264											74.197	1.24927			20.418	0.343782				50.615	1.17866
			3.591	0.877923			6.342	1.55048				5.633	1.39893			3.14	0.779806				6.094	1.38971			0.71	0.161912											57.648	0.970632			23.89	0.402241				68.78	1.60166
			4.239	1.03634			6.098	1.49083				4.528	1.12451			3.857	0.95787				6.097	1.39039			0.884	0.201592											85.847	1.44542			19.66	0.33102				52.015	1.21126
			4.321	1.05639			4.557	1.11409				4.631	1.15009			4.584	1.13842				6.075	1.38538			0.703	0.160316											73.243	1.23321			22.402	0.377187				54.131	1.26053
			4.726	1.15541			9.333	2.28172				4.091	1.01598			2.454	0.609441				5.548	1.2652			0.632	0.144125											81.66	1.37493			18.261	0.307464				45.428	1.05787
			4.566	1.11629			4.226	1.03317				4.807	1.1938			3.094	0.768382				5.784	1.31901			0.787	0.179472											74.935	1.2617			18.292	0.307986				48.67	1.13336
			5.272	1.28889			3.541	0.865699				4.569	1.13469			10.371	2.5756				6.668	1.52061			0.894	0.203873											68.298	1.14995			22.984	0.386986				49.516	1.15307
			5.17	1.26395			5.419	1.32483				5.549	1.37807			2.848	0.707289				6.412	1.46223			1.148	0.261796											70.591	1.18856			15.604	0.262728				62.861	1.46383
			4.531	1.10773			4.01	0.980359				5.256	1.30531			4.536	1.1265				5.967	1.36075			0.66	0.15051											54.114	0.911129			19.808	0.333511				67.78	1.57837
			4.296	1.05028			5.308	1.29769				4.474	1.1111			3.913	0.971778				6.008	1.3701			0.799	0.182208											62.714	1.05593			16.254	0.273672				48.384	1.1267
			4.359	1.06568			3.092	0.755928				4.698	1.16673			7.356	1.82683				7.275	1.65903			0.731	0.166701											61.13	1.02926			16.662	0.280542				66.704	1.55332
			5.359	1.31016			3.763	0.919973				4.533	1.12575			3.738	0.928317				6.409	1.46154			0.739	0.168526											88.455	1.48934			17.651	0.297194				48.729	1.13474
			4.187	1.02363			2.42	0.591638				5.727	1.42228			6.067	1.50672				7.58	1.72858			0.978	0.223028											74.98	1.26245			16.604	0.279565				71.844	1.67301
			4.906	1.19941			4.812	1.17643				1.113	0.276409			2.581	0.640981				5.729	1.30647			1.061	0.241956											66.079	1.11259			17.218	0.289903				15.823	0.368466
			6.491	1.58691			6.059	1.4813				4.408	1.09471			4.418	1.09719				5.558	1.26748			0.06	0.0136827											70.514	1.18726			20.332	0.342334				42.862	0.998115
			4.194	1.02534			6.293	1.5385				5.952	1.47816			4.67	1.15978				4.078	0.929969			0.698	0.159176											73.443	1.23658			25.278	0.425611				70.665	1.64556
			5.608	1.37104			7.099	1.73555				4.677	1.16151			12.348	3.06658				6.149	1.40225			0.63	0.143669											63.323	1.06618			21.463	0.361377				62.097	1.44604
			4.287	1.04808			5.081	1.2422				5.166	1.28296			7.286	1.80945				6.768	1.54341			0.671	0.153018											74.12	1.24797			26.886	0.452685				45.539	1.06045
			3.627	0.886724			11.037	2.69831				6.12	1.51988			2.865	0.711511				6.155	1.40362			0.641	0.146177											73.266	1.2336			25.59	0.430864				54.802	1.27616
			4.72	1.15394			7.174	1.75389				5.614	1.39421			5.73	1.42302				6.982	1.59221			0.722	0.164649											72.168	1.21511			25.395	0.427581				78.221	1.82151
			3.661	0.895036			4.063	0.993317				4.185	1.03933			3.194	0.793217				6.113	1.39404			0.624	0.1423											51.687	0.870265			20.817	0.3505				42.892	0.998814
			4.244	1.03757			3.105	0.759106				5.884	1.46127			2.702	0.671031				6.72	1.53246			0.705	0.160772											68.211	1.14848			16.903	0.284599				50.305	1.17144
			5.333	1.3038			4.116	1.00627				5.087	1.26334			2.658	0.660104				7.549	1.72151			0.59	0.134547											61.227	1.03089			23.708	0.399177				62.507	1.45558
			2.627	0.642245			2.919	0.713633				5.093	1.26483			4.064	1.00928				7.086	1.61593			2.225	0.507401											41.624	0.700832			14.762	0.248551				49.508	1.15288
			5.127	1.25344			8.508	2.08002				0.817	0.202899			3.52	0.874178				4.264	0.972385			0.685	0.156211											58.044	0.977299			22.03	0.370924				7.314	0.170319
			5.06	1.23706			6.04	1.47665				6.027	1.49678			12.788	3.17585				6.417	1.46337			1.863	0.424849											79.793	1.34349			25.024	0.421334				70.426	1.63999
			1.008	0.246434			11.715	2.86407				4.687	1.164			3.849	0.955884				6.663	1.51947			0.609	0.13888											14.134	0.237977			19.414	0.326878				50.943	1.1863
			4.87	1.19061			4.549	1.11213				5.007	1.24347			2.094	0.520037				6.903	1.5742			0.635	0.144809											78.773	1.32632			21.734	0.36594				56.969	1.32662
			4.03	0.985249			5.109	1.24904				5.104	1.26756			2.452	0.608944				6.368	1.45219			0.835	0.190418											48.419	0.815241			25.255	0.425224				54.363	1.26594
			0.581	0.142042			4.607	1.12631				4.718	1.1717			3.625	0.900254				8.097	1.84648			2.013	0.459055											14.599	0.245806			28.13	0.473631				47.894	1.11529
			2.247	0.549343			6.945	1.6979				4.38	1.08776			3.493	0.867473				7.011	1.59883			3.648	0.83191											36.789	0.619424			29.367	0.494458				47.583	1.10805
			4.927	1.20455			8.508	2.08002				5.811	1.44314			4.15	1.03064				5.914	1.34866			0.778	0.177419											57.459	0.967449			33.65	0.566572				54.299	1.26445
			4.405	1.07693			9.505	2.32377				3.501	0.869459			3.102	0.770369				6.77	1.54387			1.094	0.249482											75.696	1.27451			17.146	0.288691				46.683	1.08709
			4.331	1.05884			8.563	2.09347				5.481	1.36118			4.015	0.997109				6.867	1.56599			4.476	1.02073											71.049	1.19627			23.645	0.398116				68.091	1.58562
			5.594	1.36761			3.12	0.762773				4.878	1.21143			5.813	1.44364				7.191	1.63987			0.98	0.223484											82.878	1.39543			31.039	0.52261				49.561	1.15411
			5.807	1.41969			7.418	1.81354				0.917	0.227733			14.397	3.57544				6.211	1.41639			0.633	0.144353											73.809	1.24274			25.404	0.427733				10.882	0.253406
			5.094	1.24537			5.39	1.31774				4.644	1.15332			3.217	0.798929				6.059	1.38173			0.431	0.0982876											78.282	1.31805			23.212	0.390825				56.19	1.30848
			4.272	1.04441			2.74	0.669871				5.837	1.4496			6.481	1.60953				8.246	1.88046			0.75	0.171034											63.698	1.0725			29.01	0.488447				76.003	1.76986
			4.507	1.10187			9.24	2.25898				5.732	1.42352			4.1	1.01822				7.645	1.74341			1.061	0.241956											51.966	0.874963			17.844	0.300443				64.314	1.49766
			3.737	0.913617			3.497	0.854942				2.798	0.694872			6.448	1.60133				7.627	1.7393			0.754	0.171946											45.81	0.771313			23.59	0.39719				27.099	0.631047
			5.192	1.26933			10.518	2.57143				4.167	1.03486			3.945	0.979725				8.233	1.8775			0.803	0.18312											73.093	1.23068			22.106	0.372203				52.47	1.22185
			5.632	1.3769			2.381	0.582104				4.124	1.02418			2.404	0.597024				8.358	1.906			0.392	0.0893938											82.538	1.38971			18.828	0.317011				48.5	1.12941
			1.08	0.264037			7.862	1.92209				4.953	1.23006			9.559	2.37394				6.604	1.50601			1.038	0.236711											25.925	0.436505			29.18	0.49131				50.97	1.18692
			3.51	0.85812			7.28	1.7798				5.532	1.37385			3.471	0.862009				9.371	2.13701			0.795	0.181296											50.512	0.850481			33.435	0.562952				54.141	1.26077
			4.764	1.1647			6.766	1.65414				4.818	1.19653			2.779	0.690154				6.493	1.4807			2.085	0.475475											65.882	1.10927			23.952	0.403285				55.719	1.29751
			5.302	1.29623			9.836	2.40469				2.472	0.613911			7.44	1.84769				8.465	1.9304			0.916	0.20889											69.95	1.17776			20.813	0.350433				27.403	0.638126
			5.018	1.22679			6.744	1.64876				5.991	1.48784			7.307	1.81466				7.482	1.70624			0.631	0.143897											72.546	1.22147			22.644	0.381262				53.511	1.2461
			4.79	1.17105			0.714	0.174558				4.344	1.07881			2.453	0.609193				6.455	1.47203			0.7	0.159632											74.272	1.25053			2.969	0.0499897				40.664	0.946931
			3.409	0.833428			7.354	1.7979				4.063	1.00903			3.175	0.788499				5.412	1.23418			0.741	0.168982											55.772	0.939045			31.021	0.522307				47.368	1.10305
			3.763	0.919973			8.994	2.19884				4.637	1.15158			3.462	0.859774				3.295	0.751409			0.823	0.187681											56.058	0.94386			28.534	0.480433				56.935	1.32583
			3.111	0.760573			4.356	1.06495				4.593	1.14065			5.314	1.31971				5.833	1.33019			5.455	1.24399											46.3	0.779563			31.522	0.530743				58.536	1.36311
			5.248	1.28302			6.764	1.65365				4.041	1.00357			1.99	0.494209				5.611	1.27956			1.739	0.396571											81.419	1.37087			26.675	0.449133				42.99	1.0011
			4.167	1.01874			29.469	7.20454				5.344	1.32716			4.067	1.01002				4.755	1.08436			0.783	0.17856											56.751	0.955529			30.56	0.514545				66.832	1.5563
			4.11	1.00481			30.649	7.49303				4.62	1.14736			5.329	1.32344				5.335	1.21662			0.683	0.155755											69.488	1.16998			30.633	0.515774				55.536	1.29325
			5.64	1.37886			2.092	0.511449				0.907	0.22525			4.731	1.17492				5.071	1.15642			0.497	0.113339											79.645	1.341			22.458	0.37813				17.096	0.39811
			4.196	1.02583			6.815	1.66612				5.182	1.28693			7.253	1.80125				5.068	1.15573			1.748	0.398623											55.297	0.931047			21.059	0.354575				62.851	1.46359
			4.952	1.21066			23.26	5.68657				4.903	1.21764			2.632	0.653647				5.383	1.22757			1.703	0.388361											83.159	1.40017			20.862	0.351258				53.848	1.25394
			5.55	1.35686			5.55	1.35686				3.438	0.853814			4.804	1.19305				4.885	1.114			0.802	0.182892											64.448	1.08512			24.262	0.408504				43.284	1.00794
			5.111	1.24953			13.147	3.21416				0.819	0.203395			3.941	0.978732				6.398	1.45903			1.253	0.285741											80.785	1.36019			25.381	0.427345				13.527	0.314999
			3.485	0.852008			11.062	2.70442				4.581	1.13767			2.641	0.655882				5.162	1.17717			1.224	0.279128											43.11	0.725852			26.27	0.442314				48.526	1.13001
			3.892	0.951511			10.109	2.47143				5.414	1.34455			3.219	0.799426				5.265	1.20066			4.164	0.949581											46.819	0.788301			32.404	0.545593				57.038	1.32823
			3.982	0.973514			5.295	1.29451				5.673	1.40887			12.775	3.17262				4.774	1.08869			1.566	0.357119											57.233	0.963644			30.386	0.511615				57.754	1.3449
			4.546	1.1114			6.659	1.62798				3.804	0.944708			7.074	1.7568				5.527	1.26041			0.976	0.222572											53.775	0.905421			26.325	0.44324				47.373	1.10316
			4.713	1.15223			10.185	2.49001				4.37	1.08527			6.981	1.7337				6.26	1.42756			0.882	0.201136											68.657	1.15599			21.345	0.35939				53.172	1.2382
			4.7	1.14905			11.005	2.69049				3.965	0.984692			1.873	0.465152				4.671	1.0652			0.774	0.176507											73.211	1.23267			26.489	0.446001				47.782	1.11269
			4.957	1.21188			13.951	3.41072				5.085	1.26284			7.364	1.82882				5.446	1.24194			2.438	0.555975											67.585	1.13794			24.828	0.418034				38.308	0.892068
			4.403	1.07644			10.508	2.56898				5.356	1.33014			8.197	2.03569				5.574	1.27112			0.929	0.211854											50.563	0.85134			27.215	0.458225				58.953	1.37282
			4.2	1.02681			5.457	1.33412				4.897	1.21615			4.475	1.11135				5.536	1.26246			1.272	0.290074											76.025	1.28005			22.106	0.372203				72.333	1.6844
			4.642	1.13487			52.446	12.8219				5.945	1.47642			3.718	0.92335				5.023	1.14547			0.422	0.0962351											59.033	0.993951			21.343	0.359357				59.825	1.39313
			2.427	0.59335			9.636	2.3558				3.636	0.902986			5.791	1.43817				5.475	1.24855			0.847	0.193154											42.589	0.71708			25.859	0.435393				38.386	0.893884
			4.308	1.05321			7.764	1.89813				3.206	0.796197			5.704	1.41657				4.713	1.07478			0.059	0.0134547											59.327	0.998901			30.479	0.513181				41.98	0.977576
			4.375	1.06959			5.191	1.26909				5.195	1.29016			6.308	1.56657				4.557	1.0392			0.672	0.153246											58.31	0.981778			26.41	0.444671				60.554	1.4101
			4.11	1.00481			20.314	4.96634				5.436	1.35001			5.15	1.27898				4.966	1.13247			0.988	0.225309											76.742	1.29212			21.165	0.35636				63.466	1.47791
			0.908	0.221987			12.878	3.1484				5.023	1.24744			2.248	0.558282				4.342	0.990173			1.376	0.31379											18.746	0.31563			33.461	0.56339				51.503	1.19934
			4.117	1.00652			7.534	1.8419				5.16	1.28147			4.956	1.2308				5.355	1.22118			0.805	0.183577											56.539	0.951959			27.067	0.455733				74.087	1.72524
			5.285	1.29207			9.84	2.40567				4.696	1.16623			5.049	1.2539				4.549	1.03738			0.914	0.208433											95.316	1.60486			29.443	0.495738				67.247	1.56596
			4.758	1.16323			4.979	1.21726				5.38	1.3361			1.089	0.270449				6.23	1.42072			2.405	0.548449											63.698	1.0725			27.443	0.462064				53.444	1.24454
			3.613	0.883301			6.387	1.56149				3.908	0.970536			5.388	1.33809				4.949	1.1286			0.81	0.184717											51.106	0.860483			24.446	0.411602				40.851	0.951286
			3.849	0.940998			44.826	10.959				4.949	1.22906			0.437	0.108527				6.626	1.51103			0.994	0.226677											53.866	0.906953			25.074	0.422176				58.062	1.35207
			0.953	0.232988			6.79	1.66001				3.791	0.94148			4.238	1.05249				5.132	1.17033			1.134	0.258603											17.099	0.287899			26.775	0.450816				51.53	1.19996
			3.39	0.828783			11.259	2.75258				4.659	1.15704			6.649	1.65125				5.324	1.21411			0.785	0.179016											55.737	0.938456			27.483	0.462737				55.731	1.29779
			4.817	1.17765			6.714	1.64143				3.794	0.942225			3.521	0.874426				4.737	1.08025			0.827	0.188594											64.043	1.07831			22.232	0.374325				49.352	1.14925
			4.462	1.09086			36.461	8.91394				4.252	1.05597			6.232	1.54769				5.015	1.14365			0.789	0.179928											70.783	1.19179			25.432	0.428204				44.896	1.04548
			5.283	1.29158			53.107	12.9835				5.261	1.30655			5.304	1.31723				2.463	0.561676			0.758	0.172858											58.916	0.991981			22.003	0.370469				48.58	1.13127
			6.206	1.51723			7.169	1.75267				4.874	1.21044			0.389	0.0966066				5.168	1.17854			0.874	0.199312											80.391	1.35356			23.27	0.391802				57.69	1.34341
			4.985	1.21873			8.962	2.19102				4.544	1.12848			3.267	0.811346				4.606	1.05038			0.81	0.184717											79.852	1.34448			21.896	0.368668				58.632	1.36535
			3.827	0.93562			6.497	1.58838				0.772	0.191723			0.504	0.125166				5.606	1.27842			0.801	0.182664											59.807	1.00698			27.964	0.470836				9.754	0.227139
			3.719	0.909216			5.212	1.27422				3.689	0.916148			7.328	1.81988				6.284	1.43304			0.89	0.20296											52.371	0.881782			32.491	0.547058				42.827	0.9973
			0.735	0.179692			5.099	1.2466				4.781	1.18734			12.892	3.20168				5.23	1.19268			0.767	0.174911											15.533	0.261532			19.248	0.324083				66.081	1.53881
			4.08	0.997473			11.629	2.84304				5.403	1.34181			4.249	1.05522				5.436	1.23965			0.547	0.124741											59.44	1.0008			23.8	0.400726				66.959	1.55926
			5.088	1.24391			19.973	4.88297				4.106	1.01971			2.376	0.59007				3.031	0.691206			0.046	0.0104901											91.33	1.53774			23.518	0.395978				47.11	1.09704
			4.297	1.05052			7.5	1.83359				3.988	0.990404			0.808	0.200664				6.896	1.5726			0.86	0.196119											48.267	0.812682			24.832	0.418102				44.687	1.04061
			4.556	1.11384			5.928	1.44927				4.825	1.19827			3.386	0.8409				5.601	1.27728			1.165	0.265673											70.855	1.193			29.025	0.4887				45.941	1.06982
			5.599	1.36884			8.421	2.05875				4.392	1.09074			3.76	0.933781				7.785	1.77533			0.682	0.155527											78.546	1.3225			24.712	0.416081				53.105	1.23664
			0.571	0.139597			4.339	1.06079				4.064	1.00928			5.022	1.24719				4.983	1.13635			0.85	0.193839											14.371	0.241968			34.558	0.58186				59.532	1.3863
			2.463	0.602151			9.818	2.40029				4.292	1.0659			8.649	2.14794				5.065	1.15505			0.782	0.178331											35.033	0.589858			19.111	0.321776				57.919	1.34874
			5.296	1.29476			24.259	5.93081				4.695	1.16598			11.771	2.92328				6.115	1.3945			0.321	0.0732026											92.269	1.55355			25.343	0.426705				66.567	1.55013
			4.91	1.20039			9.889	2.41765				4.82	1.19703			15.842	3.9343				5.474	1.24832			0.7	0.159632											75.081	1.26415			23.93	0.402914				52.452	1.22143
			5.132	1.25466			10.5	2.56703				5.206	1.29289			3.72	0.923847				8.026	1.83029			0.73	0.166473											78.473	1.32127			16.915	0.284801				55.85	1.30056
			4.633	1.13267			5.989	1.46418				4.73	1.17468			5.602	1.39123				6.441	1.46884			0.655	0.14937											65.817	1.10817			22.635	0.38111				46.821	1.09031
			4.821	1.17863			6.293	1.5385				4.669	1.15953			4.68	1.16226				5.712	1.3026			0.598	0.136371											49.926	0.840615			26.494	0.446085				47.719	1.11122
			4.301	1.0515			14.227	3.4782				4.443	1.1034			6.53	1.6217				5.037	1.14866			0.689	0.157123											47.407	0.798202			30.14	0.507474				67.058	1.56156
			5.937	1.45147			13.219	3.23176				3.835	0.952407			3.226	0.801164				5.508	1.25607			0.569	0.129758											85.79	1.44446			22.178	0.373416				57.921	1.34879
			1.068	0.261103			8.786	2.14799				4.687	1.164			5.622	1.3962				5.72	1.30442			0.821	0.187225											25.449	0.42849			30.51	0.513703				59.489	1.3853
			4.419	1.08035			5.523	1.35026				4.734	1.17567			3.184	0.790734				4.976	1.13475			0.564	0.128618											68.711	1.1569			32.253	0.543051				45.784	1.06616
			4.434	1.08402			10.245	2.50468				4.074	1.01176			4.123	1.02393				7.103	1.61981			1.344	0.306493											65.835	1.10848			25.838	0.43504				43.623	1.01584
			0.953	0.232988			5.337	1.30478				4.146	1.02964			2.905	0.721445				6.207	1.41548			0.667	0.152106											15.821	0.266382			17.907	0.301504				57.544	1.34001
			5.613	1.37226			4.06	0.992583				4.056	1.00729			4.635	1.15108				6.776	1.54524			0.74	0.168754											90.732	1.52767			28.561	0.480888				50.145	1.16771
			5.468	1.33681			9.627	2.3536				4.427	1.09943			14.617	3.63007				5.305	1.20978			0.931	0.21231											73.908	1.2444			25.554	0.430258				48.242	1.1234
			5.13	1.25418			5.677	1.38791				4.274	1.06143			12.466	3.09588				6.589	1.50259			0.632	0.144125											73.968	1.24541			30.511	0.51372				46.764	1.08898
			5.102	1.24733			15.313	3.7437				3.878	0.963086			5.158	1.28097				6.031	1.37534			1.178	0.268637											77.061	1.29749			25.871	0.435595				50.382	1.17323
			5.563	1.36003			6.105	1.49254				4.385	1.089			10.558	2.62204				7.247	1.65264			0.833	0.189962											69.822	1.17561			23.776	0.400322				53.626	1.24877
			3.3	0.80678			5.777	1.41235				0.606	0.150498			2.671	0.663332				9.735	2.22002			0.734	0.167385											46.053	0.775404			28.573	0.48109				9.528	0.221876
			4.972	1.21555			10.423	2.5482				4.768	1.18411			5.432	1.34902				6.435	1.46747			0.792	0.180612											83.614	1.40783			26.032	0.438306				64.03	1.49105
			4.481	1.09551			10.241	2.50371				4.734	1.17567			4.723	1.17294				5.84	1.33178			0.715	0.163052											64.115	1.07952			18.328	0.308592				43.686	1.0173
			4.666	1.14074			7.296	1.78372				6.039	1.49976			4.111	1.02095				7.726	1.76188			0.346	0.0789037											60.727	1.02247			28.409	0.478328				51.218	1.1927
			5.863	1.43338			9.53	2.32988				5.015	1.24546			4.883	1.21267				5.545	1.26451			0.514	0.117215											114.098	1.92109			29.839	0.502406				57.968	1.34988
			4.533	1.10822			1.232	0.301198				3.883	0.964327			0.507	0.125911				7.185	1.63851			0.188	0.0428725											74.605	1.25614			1.838	0.0309468				45.639	1.06278
			5.957	1.45636			7.772	1.90009				4.157	1.03237			4.685	1.1635				6.399	1.45926			1.195	0.272514											79.206	1.33361			29.392	0.494879				66.533	1.54934
			4.809	1.1757			5.742	1.4038				4.555	1.13122			5.816	1.44438				6.392	1.45767			2.531	0.577183											61.621	1.03753			25.702	0.43275				64.527	1.50262
			5.048	1.23413			9.767	2.38782				4.233	1.05125			5.962	1.48064				6.628	1.51148			0.777	0.177191											86.461	1.45576			29.662	0.499425				50.829	1.18364
			5.221	1.27642			11.173	2.73156				4.173	1.03635			5.376	1.33511				6.662	1.51924			0.535	0.122004											84.723	1.4265			21.918	0.369038				49.869	1.16129
			3.513	0.858853			1.939	0.474044				4.166	1.03461			4.83	1.19951				6.462	1.47363			0.894	0.203873											41.574	0.69999			12.973	0.218429				46.988	1.0942
			4.313	1.05444			11.263	2.75356				3.649	0.906215			9.834	2.44223				9.577	2.18399			0.688	0.156895											48.919	0.82366			31.266	0.526432				46.796	1.08973
			4.936	1.20675			10.45	2.5548				3.612	0.897026			4.779	1.18685				6.756	1.54067			0.831	0.189506											54.22	0.912914			20.012	0.336946				38.777	0.902989
			5.144	1.2576			5.887	1.43925				4.534	1.126			4.398	1.09223				8.019	1.8287			0.806	0.183805											67.873	1.14279			27.501	0.46304				43.349	1.00946
			6.292	1.53826			10.317	2.52229				3.667	0.910685			5.615	1.39446				7.2	1.64193			0.651	0.148458											95.573	1.60918			36.829	0.620098				46.909	1.09236
			4.894	1.19648			14.59	3.56694				3.765	0.935023			5.263	1.30704				7.246	1.65242			0.776	0.176963											73.603	1.23927			25.485	0.429096				42.64	0.992946
			5.071	1.23975			10.773	2.63377				3.855	0.957374			4.378	1.08726				7.232	1.64922			0.493	0.112426											54.645	0.920069			24.822	0.417933				49.053	1.14228
			4.284	1.04735			8.433	2.06169				0.54	0.134107			3.385	0.840651				8.097	1.84648			0.626	0.142756											79.45	1.33772			24.396	0.410761				7.412	0.172601
			2.162	0.528563			4.214	1.03023				3.89	0.966066			2.686	0.667057				6.171	1.40727			0.693	0.158035											39.496	0.665002			41.394	0.69696				52.172	1.21491
			4.422	1.08108			6.683	1.63385				1.02	0.253313			2.847	0.707041				5.646	1.28754			0.681	0.155299											60.267	1.01473			40.421	0.680577				11.393	0.265306
			4.581	1.11996			5.201	1.27153				4.616	1.14637			6.465	1.60556				8.604	1.9621			0.558	0.127249											82.871	1.39532			46.361	0.78059				52.129	1.21391
			0.863	0.210985			10.694	2.61445				3.821	0.94893			7.234	1.79653				7.934	1.80931			0.831	0.189506											17.886	0.30115			45.934	0.7734				42.354	0.986286
			5.725	1.39964			5.566	1.36077				0.657	0.163163			12.056	2.99406				10.249	2.33724			1.068	0.243552											106.135	1.78702			43.259	0.728361				8.262	0.192395
			4.383	1.07155			4.699	1.14881				4.22	1.04802			3.153	0.783035				7.616	1.73679			0.836	0.190646											71.799	1.20889			8.392	0.141298				44.53	1.03696
			4.823	1.17912			4.836	1.1823				3.818	0.948185			5.384	1.33709				8.148	1.85811			0.507	0.115619											69.381	1.16818			39.216	0.660288				51.232	1.19303
			5.86	1.43264			9.816	2.3998				3.723	0.924592			2.475	0.614656				7.194	1.64056			0.802	0.182892											94.835	1.59676			33.957	0.571741				48.127	1.12072
			3.566	0.871811			11.94	2.91907				5.037	1.25092			13.658	3.39191				8.645	1.97145			0.441	0.100568											55.106	0.927831			32.06	0.539801				54.004	1.25758
			0.898	0.219542			4.749	1.16103				0.503	0.124918			3.535	0.877903				7.5	1.71034			0.704	0.160544											15.672	0.263873			36.266	0.610618				10.182	0.237105
			3.436	0.840029			6.269	1.53264				4.414	1.0962			0.704	0.174836				7.181	1.63759			0.916	0.20889											57.992	0.976424			38.683	0.651314				47.975	1.11718
			5.409	1.32238			9.291	2.27145				4.533	1.12575			1.633	0.405549				7.289	1.66222			0.09	0.0205241											67.761	1.14091			50.817	0.855617				50.159	1.16804
			5.058	1.23657			4.447	1.0872				4.647	1.15406			6.877	1.70788				8.67	1.97715			0.84	0.191558											79.049	1.33096			38.275	0.644444				66.921	1.55837
			5.807	1.41969			6.049	1.47885				4.339	1.07757			8.905	2.21152				9.023	2.05765			1.356	0.30923											63.867	1.07534			41.869	0.704957				53.697	1.25043
			6.392	1.56271			11.884	2.90538				4.148	1.03014			7.863	1.95274				9.816	2.23849			0.047	0.0107181											91.898	1.54731			40.129	0.67566				51.064	1.18911
			6.293	1.5385			4.372	1.06886				4.168	1.03511			5.047	1.2534				9.578	2.18422			1.285	0.293038											88.246	1.48582			34.344	0.578257				55.39	1.28985
			5.417	1.32434			0.472	0.115394				4.002	0.993881			9.865	2.44993				13.434	3.06356			0.974	0.222116											87.425	1.47199			3.598	0.0605803				47.09	1.09657
			3.749	0.91655			5.976	1.461				5.069	1.25887			6.263	1.55539				4.178	0.952774			0.756	0.172402											68.296	1.14991			40.377	0.679836				55.876	1.30117
			3.506	0.857142			3.934	0.961779				3.704	0.919874			1.877	0.466145				4.704	1.07273			0.705	0.160772											58.28	0.981273			37.928	0.638602				47.734	1.11157
			0.733	0.179203			7.477	1.82797				4.76	1.18213			11.669	2.89795				6.078	1.38606			0.264	0.060204											15.663	0.263721			41.523	0.699132				48.17	1.12172
			4.333	1.05933			17.227	4.21163				4.844	1.20299			3.877	0.962837				4.986	1.13703			1.142	0.260428											65.473	1.10238			46.388	0.781045				62.363	1.45223
			4.645	1.1356			3.78	0.924129				4.34	1.07782			3.38	0.839409				4.183	0.953914			0.791	0.180384											52.392	0.882135			38.251	0.64404				44.729	1.04159
			5.364	1.31138			5.029	1.22948				4.2	1.04305			18.115	4.49879				4.663	1.06338			1.738	0.396343											100.822	1.69756			46.034	0.775084				48.418	1.1275
			5.046	1.23364			5.073	1.24024				4.203	1.0438			2.313	0.574424				5.443	1.24125			0.115	0.0262252											78.649	1.32423			42.483	0.715295				56.59	1.3178
			4.394	1.07424			4.048	0.98965				2.981	0.740319			3.869	0.960851				5.062	1.15437			0.602	0.137283											64.582	1.08738			40.653	0.684483				37.203	0.866336
			4.225	1.03292			9.43	2.30543				3.416	0.84835			2.796	0.694375				4.647	1.05973			0.759	0.173086											54.316	0.91453			30.627	0.515673				44.468	1.03551
			4.678	1.14367			6.231	1.52335				3.873	0.961844			10.447	2.59447				4.854	1.10693			0.753	0.171718											55.512	0.934667			39.134	0.658907				53.667	1.24973
			5.428	1.32703			6.124	1.49719				5.443	1.35175			2.411	0.598762				4.148	0.945932			1.199	0.273426											82.676	1.39203			51.019	0.859018				65.455	1.52423
			5.38	1.3153			0.942	0.230299				2.889	0.717472			4.461	1.10787				3.961	0.903288			0.482	0.109918											95.673	1.61087			6.887	0.115958				40.497	0.943042
			4.005	0.979137			5.183	1.26713				3.787	0.940486			9.075	2.25374				3.895	0.888237			0.6	0.136827											63.974	1.07714			30.716	0.517172				47.989	1.11751
			5.864	1.43362			0.498	0.12175				4.31	1.07037			5.011	1.24446				4.683	1.06794			0.89	0.20296											84.038	1.41497			3.138	0.0528352				46.689	1.08723
			3.888	0.950533			4.13	1.0097				6.076	1.50895			6.513	1.61748				4.283	0.976718			0.322	0.0734306											63.357	1.06676			40.417	0.68051				62.877	1.4642
			6.2	1.51577			7.262	1.7754				4.509	1.11979			3.678	0.913417				4.112	0.937723			0.355	0.0809561											87.725	1.47704			40.898	0.688608				48.823	1.13693
			4.194	1.02534			5.566	1.36077				3.519	0.87393			5.138	1.276				4.927	1.12358			1.011	0.230554											51.739	0.87114			36.089	0.607638				46.459	1.08188
			6.101	1.49156			14.15	3.45937				3.344	0.830469			5.052	1.25464				4.102	0.935442			0.332	0.0757111											96.233	1.6203			26.328	0.44329				46.006	1.07133
			6.07	1.48399			5.66	1.38375				4.395	1.09148			3.695	0.917638				4.667	1.06429			0.762	0.173771											83.358	1.40352			39.025	0.657072				49.699	1.15733
			4.438	1.085			6.188	1.51283				4.498	1.11706			4.851	1.20473				3.688	0.841031			1.79	0.408201											61.947	1.04301			47.137	0.793656				50.411	1.17391
			3.832	0.936842			9.495	2.32132				2.897	0.719458			6.162	1.53031				4.814	1.09781			0.661	0.150738											55.497	0.934415			39.584	0.666484				41.69	0.970823
			5.158	1.26102			6.228	1.52261				3.411	0.847108			2.909	0.722438				4.284	0.976946			0.609	0.13888											73.198	1.23245			42.083	0.70856				44.001	1.02464
			6.456	1.57835			4.257	1.04075				4.515	1.12128			3.577	0.888334				4.419	1.00773			0.134	0.0305581											113.331	1.90818			46.189	0.777694				58.576	1.36404
			5.036	1.23119			5.52	1.34952				4.089	1.01549			3.317	0.823764				4.23	0.964632			1.59	0.362592											70.558	1.188			39.342	0.66241				48.79	1.13616
			5.125	1.25295			11.188	2.73523				3.63	0.901496			4.434	1.10117				3.965	0.9042			1.143	0.260656											68.414	1.1519			35.832	0.603311				40.923	0.952962
			3.799	0.928774			23.122	5.65284				4.187	1.03982			2.503	0.62161				3.826	0.872502			2.502	0.57057											53.361	0.89845			32.176	0.541754				42.441	0.988312
			4.661	1.13951			5.712	1.39646				4.12	1.02319			7.932	1.96988				4.076	0.929513			0.613	0.139792											76.186	1.28276			48.422	0.815291				55.76	1.29847
			5.939	1.45196			4.704	1.15003				3.84	0.953649			0.485	0.120448				4.075	0.929285			0.813	0.185401											96.664	1.62755			36.65	0.617084				37.454	0.872181
			4.525	1.10627			2.847	0.696031				3.894	0.967059			1.8	0.447023				3.723	0.849013			2.197	0.501016											68.857	1.15936			25.352	0.426857				33.109	0.771
			4.879	1.19281			11.08	2.70882				4.077	1.01251			2.466	0.612421				3.15	0.718343			0.619	0.14116											83.499	1.40589			36.851	0.620468				48.235	1.12323
			4.635	1.13316			5.118	1.25124				4.115	1.02194			11.552	2.86889				4.36	0.994278			0.298	0.0679575											72.259	1.21664			33.819	0.569418				48.431	1.1278
			5.026	1.22875			7.729	1.88958				3.858	0.958119			4.748	1.17915				3.713	0.846732			0.598	0.136371											61.483	1.0352			45.036	0.758281				45.663	1.06334
			5.578	1.3637			13.082	3.19827				5.193	1.28966			1.85	0.45944				3.727	0.849925			0.245	0.0558711											91.828	1.54613			31.674	0.533302				47.632	1.10919
			6.641	1.62358			3.612	0.883057				3.835	0.952407			5.494	1.36441				4.431	1.01047			0.849	0.193611											93.577	1.57558			41.704	0.702179				39.691	0.924273
			5.335	1.30429			15.674	3.83196				3.206	0.796197			4.801	1.19231				3.38	0.770793			0.525	0.119724											76.181	1.28268			40.257	0.677816				33.827	0.78772
			5.518	1.34903			6.011	1.46956				3.581	0.889327			5.377	1.33536				4.177	0.952546			1.516	0.345717											76.974	1.29603			38.367	0.645993				35.203	0.819762
			4.754	1.16225			4.773	1.1669				3.638	0.903483			6.104	1.5159				4.015	0.915602			0.832	0.189734											84.108	1.41614			40.111	0.675357				43.553	1.01421
			4.679	1.14392			17.152	4.1933				4.926	1.22335			4.436	1.10166				3.481	0.793826			0.738	0.168297											65.516	1.10311			39.251	0.660877				55.837	1.30026
			5.007	1.2241			20.526	5.01817				3.834	0.952159			10.98	2.72684				3.765	0.858591			0.347	0.0791317											68.568	1.15449			41.31	0.695545				45.098	1.05018
			5.317	1.29989			11.001	2.68951				3.221	0.799922			13.425	3.33404				3.883	0.8855			2.058	0.469317											79.649	1.34107			40.181	0.676536				34.281	0.798292
			4.732	1.15687			5.873	1.43582				4.475	1.11135			3.412	0.847357				3.439	0.784248			2.196	0.500788											62.521	1.05268			38.585	0.649664				50.103	1.16673
			5.203	1.27202			2.357	0.576236				4.91	1.21938			12.887	3.20043				4.36	0.994278			0.416	0.0948669											78.072	1.31451			13.931	0.234559				52.209	1.21578
			5.501	1.34488			13.471	3.29337				4.421	1.09794			5.391	1.33883				4.214	0.960983			1.025	0.233747											74.406	1.25279			42.878	0.721946				45.158	1.05158
			4.728	1.15589			4.2	1.02681				4.811	1.19479			2.547	0.632537				3.887	0.886412			0.779	0.177647											57.569	0.969301			39.433	0.663942				52.014	1.21124
			1.801	0.440306			21.387	5.22866				3.535	0.877903			3.522	0.874675				3.548	0.809105			0.95	0.216643											19.558	0.329302			41.183	0.693407				43.108	1.00384
			5.066	1.23853			3.87	0.946132				4.876	1.21094			7.918	1.9664				3.422	0.780371			1.712	0.390414											67.838	1.1422			27.405	0.461424				53.036	1.23503
			4.741	1.15907			11.391	2.78486				4.847	1.20373			4.697	1.16648				2.734	0.623476			0.053	0.0120864											70.018	1.17891			33.396	0.562295				57.275	1.33375
			3.357	0.820715			3.21	0.784776				4.413	1.09595			5.748	1.42749				3.206	0.731113			0.662	0.150966											55.466	0.933893			35.483	0.597435				42.203	0.982769
			4.035	0.986471			7.514	1.83701				5.427	1.34777			7.94	1.97187				3.459	0.788809			1.413	0.322228											61.356	1.03306			42.956	0.723259				43.16	1.00505
			3.569	0.872544			6.847	1.67395				3.27	0.812091			4.2	1.04305				3.208	0.73157			0.706	0.161											57.8	0.973191			51.19	0.861897				44.004	1.02471
			1.317	0.321978			11.598	2.83546				5.561	1.38105			5.267	1.30804				3.826	0.872502			0.766	0.174683											25.37	0.42716			37.595	0.632995				52.934	1.23266
			5.61	1.37153			4.368	1.06788				3.164	0.785767			4.128	1.02517				4.161	0.948897			0.757	0.17263											68.921	1.16044			32.879	0.553591				37.688	0.87763
			5.686	1.39011			8.631	2.1101				3.563	0.884857			0.362	0.0899012				4.152	0.946844			0.828	0.188822											71.212	1.19901			44.104	0.742588				43.967	1.02385
			3.763	0.919973			2.614	0.639067				5.507	1.36764			4.232	1.051				4.137	0.943424			0.761	0.173543											53.781	0.905522			19.099	0.321574				52.891	1.23166
			4.862	1.18866			8.08	1.97539				3.645	0.905221			3.811	0.946447				3.826	0.872502			0.906	0.206609											77.137	1.29877			49.353	0.830967				37.433	0.871692
			5.401	1.32043			9.741	2.38147				4.078	1.01275			7.087	1.76003				3.69	0.841487			0.893	0.203645											70.445	1.1861			47.265	0.795811				39.977	0.930933
			6.266	1.5319			14.805	3.61951				4.81	1.19454			3.838	0.953152				3.553	0.810245			1.39	0.316983											94.373	1.58898			33.343	0.561403				48.736	1.1349
			6.82	1.66734			7.548	1.84532				3.423	0.850088			5.539	1.37559				4.546	1.03669			0.772	0.176051											112.115	1.8877			32.968	0.555089				41.408	0.964256
			5.418	1.32459			7.062	1.72651				4.624	1.14835			2.808	0.697356				4.118	0.939091			1.643	0.374679											84.481	1.42242			38.004	0.639881				58.429	1.36062
			4.099	1.00212			10.916	2.66873				3.51	0.871694			8.668	2.15266				3.584	0.817315			0.947	0.215959											64.29	1.08246			44.11	0.742689				38.468	0.895793
			0.713	0.174313			2.615	0.639312				4.342	1.07832			3.236	0.803648				4.019	0.916514			0.667	0.152106											10.09	0.169887			32.894	0.553843				33.998	0.791702
			5.569	1.3615			13.283	3.24741				3.095	0.768631			3.471	0.862009				4.27	0.973754			1.12	0.255411											82.36	1.38671			38.718	0.651903				38.825	0.904107
			5.051	1.23486			4.036	0.986716				3.771	0.936513			3.731	0.926579				4.008	0.914006			0.958	0.218467											92.617	1.55941			36.473	0.614104				42.428	0.988009
			4.626	1.13096			4.719	1.15369				4.074	1.01176			6.499	1.614				3.893	0.887781			0.918	0.209346											62.466	1.05175			43.164	0.726761				44.212	1.02955
			5.285	1.29207			7.586	1.85461				4.399	1.09247			7.095	1.76201				4.253	0.969877			0.861	0.196347											86.379	1.45438			35.218	0.592973				46.017	1.07158
			3.941	0.96349			3.694	0.903104				3.797	0.94297			3.937	0.977738				3.958	0.902604			0.594	0.135459											73.172	1.23201			37.907	0.638248				36.62	0.85276
			4.628	1.13145			7.377	1.80352				0.599	0.148759			5.981	1.48536				4.022	0.917198			1.057	0.241044											72.638	1.22302			30.766	0.518014				11.1	0.258483
			1.467	0.35865			6.968	1.70353				3.868	0.960602			3.239	0.804393				3.344	0.762584			0.906	0.206609											29.719	0.500385			34.647	0.583359				38.334	0.892673
			0.821	0.200717			3.887	0.950288				3.806	0.945205			3.881	0.963831				4.681	1.06748			1.1	0.25085											14.529	0.244628			34.015	0.572718				46.613	1.08546
			3.404	0.832205			2.538	0.620487				3.964	0.984444			6.481	1.60953				3.727	0.849925			1.204	0.274567											52.816	0.889274			16.844	0.283606				39.898	0.929093
			3.415	0.834895			2.8	0.68454				3.899	0.968301			4.159	1.03287				4.282	0.97649			0.79	0.180156											61.53	1.03599			16.923	0.284936				46.618	1.08558
			5.358	1.30992			2.898	0.708499				1.02	0.253313			18.291	4.5425				5.896	1.34456			0.899	0.205013											89.824	1.51239			27.008	0.454739				10.292	0.239667
			3.721	0.909705			7.235	1.7688				4.416	1.0967			3.215	0.798432				4.412	1.00614			0.693	0.158035											55.782	0.939213			29.012	0.488481				45.687	1.0639
			4.75	1.16127			25.489	6.23152				5.591	1.3885			3.18	0.78974				4.029	0.918795			0.481	0.10969											77.283	1.30123			37.764	0.63584				58.776	1.3687
			3.31	0.809224			7.196	1.75927				0.557	0.138329			11.496	2.85499				3.58	0.816402			1.191	0.271602											45.523	0.76648			37.62	0.633416				9.574	0.222947
			4.069	0.994784			4.596	1.12362				4.815	1.19579			5.696	1.41458				4.445	1.01366			0.876	0.199768											59.687	1.00496			36.303	0.611241				40.407	0.940946
			6.081	1.48667			11.392	2.7851				3.609	0.896281			2.427	0.602736				3.685	0.840347			1.343	0.306265											98.536	1.65907			36.862	0.620653				41.955	0.976994
			4.176	1.02094			8.057	1.96976				4.023	0.999096			2.674	0.664077				4.962	1.13156			0.603	0.137511											68.021	1.14528			34.181	0.575513				37.094	0.863797
			5.094	1.24537			11.986	2.93032				3.948	0.98047			2.726	0.676991				5.358	1.22187			0.785	0.179016											61.926	1.04266			36.278	0.61082				49.777	1.15914
			5.277	1.29011			34.93	8.53964				0.874	0.217054			2.59	0.643216				3.893	0.887781			0.9	0.205241											108.167	1.82123			39.829	0.670609				8.306	0.193419
			4.42	1.0806			9.144	2.23551				4.514	1.12103			4.522	1.12302				3.406	0.776723			0.765	0.174455											84.872	1.42901			42.167	0.709975				38.445	0.895258
			6.049	1.47885			21.274	5.20104				3.627	0.900751			4.705	1.16847				2.575	0.587217			1.227	0.279812											101.796	1.71396			36.279	0.610837				33.579	0.781945
			4.574	1.11825			10.373	2.53598				4.121	1.02343			2.533	0.62906				3.056	0.696907			0.877	0.199996											62.965	1.06015			32.999	0.555611				40.41	0.941016
			6.06	1.48154			28.899	7.06519				2.963	0.735849			2.146	0.53295				3.79	0.864292			1.607	0.366469											68.818	1.1587			39.652	0.667629				30.568	0.711828
			6.03	1.47421			4.372	1.06886				3.976	0.987424			5.314	1.31971				4.526	1.03213			1.15	0.262252											99.312	1.67214			38.724	0.652004				43.242	1.00696
			3.645	0.891125			4.802	1.17399				4.765	1.18337			8.034	1.99521				4.991	1.13817			0.731	0.166701											34.88	0.587282			36.468	0.614019				42.644	0.993039
			4.744	1.15981			3.608	0.882079				3.332	0.827489			7.81	1.93958				3.652	0.832822			0.827	0.188594											77.832	1.31047			30.223	0.508871				29.161	0.679064
			3.908	0.955423			4.794	1.17203				4.754	1.18064			2.931	0.727902				3.605	0.822104			1.273	0.290302											60.735	1.02261			25.663	0.432093				47.175	1.09855
			5.224	1.27716			6.754	1.65121				4.107	1.01996			0.484	0.120199				2.58	0.588357			0.919	0.209574											78.612	1.32361			25.567	0.430477				40.582	0.945022
			6.069	1.48374			13.619	3.32955				4.608	1.14438			2.418	0.600501				5.302	1.2091			0.771	0.175823											72.244	1.21639			28.733	0.483784				49.842	1.16066
[truncated: 1,206 more rows]
[truncated: 9 more columns]

## Sheet: F7H
qPCR Analysis of ectoderm markers in hESCs cultured in YSLC CM for 11 days followed by 4 days in FGF2
[truncated: 35 more rows]
