# Supplementary material for: An in vitro stem cell model of human epiblast and yolk sac interaction
Source: eLife. 2021 Aug 17;10:e63930. doi: 10.7554/eLife.63930 (PMC8370770; doi:10.7554/eLife.63930)
Supplement: Supplementary file 1. [file elife-63930-supp1.xlsx]

## Sheet: TrB, EPI, Hypo and DE markers
Supplementary Table 1
Trophoblast	Epiblast	Hypoblast	Definitive Endoderm
TFEB	POU5F1	APOA1	RFPL2
FAM107A	VASH2	FN1	TUBA1B
FAM110A	MT1X	APOC1	DKK4
PGF	MT1G	APOA2	PRSS2
RELT	DPPA5	RSPO3	DIO3
UBE2Q2	FOXD3-AS1	MARCKS	DKK1
ANGPT4	MT1H	COL18A1	MFAP4
CYP19A1	BBC3	C12orf75	LEFTY1
PID1	KHDC3L	S100A14	AC069528.1
PAGE4	USP44	GPC3	GYPE
CGA	SOX2	COL4A1	LEFTY2
FAM49A	TDGF1	S100A16	CD48
PTGES	WARS	FLRT3	MT-ND1
PRKCH	CCL26	CDH2	MT-ND4
SMIM4	UTF1	TUBB4A	ACTC1
EFNA1	FAM84B	S100A13	MT-ND2
STS	IFITM3	APOE	SPOCK1
SPPL2A	KIAA1551	TBCA	CLDN11
SH3BP5	CD70	SERPINH1	IVNS1ABP
NATD1	PTPRZ1	PPP1R14A	TMSB15B
ERVW-1	DCLK1	CKB	CCN1
MAP3K8	NMRK2	AK4	NPPA
RAB11FIP4	PTMA	FAM213A	FREM1
INSL4	SYT1	ALDH1A1	IGFBP2
MXD1	BST2	S100A10	CCN2
KRT7	PIM2	GPX2	PRSS35
TNFAIP3	TERF1	HSPG2	HLA-DRB1
CPM	NLRP7	LGALS2	MT-ND5
ST3GAL1	FGF2	GSN	COL5A2
GATA2	FOXH1	DENND2C	ANGPT2
CDH5	RNASET2	MYL4	MIXL1
LINC00668	MT2A	HNF1B	MT-RNR1
UBR5	THY1	SPARC	AC010251.1
LINC00643	PYCARD	IDH1	FEZ1
KIAA1217	LITAF	CST1	CYP26A1
FHDC1	FRAT2	PODXL	SERPINB9
GNE	JARID2	CD99	GYPB
CGB8	C9orf135	VCAN	STC1
IER5L	KHDC1L	FRZB
PIK3C2A	CACNA2D1	DMKN
CYRIA	CBR3	FOXA2
C1orf21	CECR2	LBH
NFE2L3	MT1M	SPATS2L
SMAGP	CXADR	BMP2
BOP1	NES	TMSB10
PGP	ARL4A	GJA1
SLC7A6	MEG3	DYNLT3
ZNF114	MT1E	FRAS1
PAPOLA	ZNF649	ZCCHC24
ARID3A	ARHGEF10	ADD3
WWC1	DIAPH2	AMHR2
GREB1L	C6orf106	PLCXD2
SLC20A2	USP28	TMEM37
VKORC1L1	RNF125	C19orf33
C2orf72	PLPP2	H1F0
CSF2RA	CRABP1	PCBD1
METTL26	PHLDA1	CACHD1
SPAG9	NANOG	EXT1
GNA12	NPW	CERS6
ZNRF1	SPP1	F3
CD47	DND1	COL4A2
MED12L	SAMHD1	EPSTI1
GATA3	EIF3K	HPGD
FOLR1	PMAIP1	CADM1
CSF3R	HLA-C	LINC01405
LCMT1-AS2	AKAP12	DUSP4
ERBB3	SLC25A29	OCLN
TINAGL1	NETO2	CST3
CDH1	HLA-B	GPR161
NEURL1	NEFL	PDZRN3
ADAP2	MID1IP1	MFGE8
CALCB	CHST2	MGST2
SMARCA2	RBPMS2	DPP4
GJA5	CR1L	FARP1
TGFBR2	DPPA4	TLN2
PITPNA	ZFP57	MYRF
PRKCZ	GPR160	LINC00261
MLLT1	MKRN1	FST
RGL2	ATCAY	LARP6
BHLHE40	HBA2	RGS9
GOT1	FGF4	TRABD2B
ESRRG	DDX43	NTS
MAGI1	MT1F	RNASE1
RASSF7	CDA	CLDN19
TM9SF3	ZNF770	CALM2
XAGE2	ZNF90	GAMT
CGB1	L1TD1	ANKRD1
CAMSAP2	CPT1A	SYNE3
MBNL3	NODAL	CALD1
PPM1N	CDCA7L	APOC3
LRRC58	PLA2G16	NQO1
ERICH1	AL353747.4	FAM198B
S1PR2	SPRY2	AGRN
CDKN1C	RPL8	TMEM92
REEP1	IFI16	GATA6
PXDC1	FOXN3	MIDN
ASAP1	BDNF	ATP1B1
PTPRE	RBP1	PORCN
SEMA7A	RASGRP2	FZD7
PLXND1	TTYH1	PCSK1N
CEBPB	ZNF486	CELA3B
DOCK9	LINC00467	HHEX
ATP6V1C2	DACT1	IGFBP6
RPS13	TRIM14	GSTA2
LCP1	GAL	DTNB
OVOL1	GPM6B	ERF
WDR18	KIF5C	TMEM141
NABP1	FAM162B	LHFPL2
LIMA1	TCEA1	NRGN
OFD1	UPP1	HOOK3
KRT18	ID1	APELA
SHTN1	HLA-A	WASF3
TNFRSF1B	FILIP1	NID2
TNFAIP2	HSPB1	AC106864.1
LGALS13	VSIG10	TMEM56
VASP	ETV4	CPN1
DVL3	VSNL1	RHPN2
FOSB	RP11-267L5.1	TMEM135
LMNB2	FAM102B	TMEM88
USP15	GABRB3	ST5
AEBP2	SIRT1	LIFR
SLC19A1	ALPL	SERPINE2
UBE2B	DPPA2	ALDH2
RHOBTB1	PCAT14	SLC2A3
MRPL55	RP11-132A1.3	CUBN
DLX5	VENTX	CAMK2D
CCND3	SLC4A7	KIT
KIF21A	NEB	LGR5
GPC1	CRMP1	GSC
PVRL3	SKIL	ZNF768
DLG5	CD9	ELL2
TET2	PRPS1	TNNC1
RGS16	SCNN1A	FAM151A
LRIF1	CCPG1	LINC00607
RNF181	RGCC	PLPP3
GRAMD3	NUAK1	AQP3
CCSER2	BEND4	PCDH7
NUCB2	MAD2L2	H2AFY2
PAXX	PBX3	COL4A5
TRIM33	PBX1	PPIC
PABPC1	RPS3	BIN1
SLC3A2	NEFH	STX3
SDC1	PSRC1	VIL1
GREM2	IRF2BPL	PLSCR2
FYB1	PIF1	HES1
SOCS6	CREB3L1	FZD4
MRPL36	ASS1	RAB17
RPS20	OAT	CTSE
FOXO6	GAS7	BCL7A
CSNK1E	ZNF462	PDGFRA
HTRA4	STOM	MTTP
VWA1	FAM46B	FSCN1
EIF1	MSTO1	APOA4
ZBTB7A	RND2	LINC02413
ALAS1	MRS2	CXCR4
RALBP1	WDHD1	GATA4
METRNL	CERS4	GNG2
LYPD3	DPYSL2	PDPN
BTG1	SERINC5	TMC7
CAV1	MSH6	LRIG3
ARF6	FAM133A	LPP
SP6	TUBB2B	EGLN3
YY1AP1	IFITM1	FAM114A1
SRPRB	RPP25	MCU
EDF1	STMN1	DDAH2
MBNL2	REST	IGF1
DLX3	PITPNC1	SLCO2A1
COL21A1	NDUFAB1	CMTM7
BCAR4	MYBL2	TMEM65
GOLGA7	ZNF296	SPATS2
BTG3	ZSCAN2	CTSZ
KRT8	FAM9C	BCL7C
SLC40A1	SUSD2	MPC2
RHOU	OLFML3	PCBP4
PRR5	SCGB3A2	EPB41L2
TINCR	SIGIRR	EHBP1
TRIM13	ZNF398	PTPN9
PPARG	SLC6A6	SFRP1
RBX1	MAN1C1	CARMIL1
RNF111	HERC5	TSPAN13
SERP1	CXCL12	PKDCC
PDLIM2	ZNF682	ZNF280A
FIP1L1	HELLS	P4HA1
PHKG2	SMIM10L2A	TRIM2
REXO2	CXXC5	ITIH5
NET1	CDH3	PTGR1
SAR1B	LIM2	CHST3
GAPDH	NUDT15	ACTG1
GRHL1	PRPSAP1	GLIPR2
HSD3B1	SLC7A3	HORMAD2-AS1
TENM3	PSIP1	MED13L
ATP6V0D1	DLG3	EDARADD
CD164	GPC4	MYO9A
PIM3	TET1	SELENOP
CEP85	ALPPL2	PROM1
AIF1L	LINC00458	GSTO1
TCF7L2	PARP1	AHNAK
DCAF12	COL6A1	UNC93A
CDYL	GDF3	LYPD6B
KRT23	STAT3	KCNJ16
LSM7	SEC63	ARHGAP12
PLIN2	RPS24	S100A1
TOP1	IFITM2	FZD5
PRDX2	SLC16A9	GALNT7
SYDE1	HUS1	LLGL2
GAR1	PDGFA	HES4
HPCAL1	ZNF675	RAP1A
GRB2	GABARAPL1	CAMK2N1
RAB9A	FLVCR1	GALNT10
TNPO1	A4GALT	ANGPT1
ARHGAP18	CSH1	FAM83F
MGAT1	FGD4	BEX5
IRX4	SAP18	PITX2
ADAMTS20	HMGB3	HAS2
SPCS1	IGSF1	N4BP2
GAB2	OOEP	LHX1
RNF11	BCL11A	CASK
TEAD3	BRD3	GJB1
HSPB8	APP	GCNT3
SLCO4A1	HRK	AC245595.1
MFSD12	ABHD12B	KCTD6
GNG12	SOX4	ZC3HAV1
CD55	CCNA1	ARHGAP5
COX20	RAP2B	STXBP6
HEXIM1	TOMM7	LGALS1
RAB11FIP1	SHPK	SIPA1L2
SVIP	N4BP3	CENPV
TMEM54	ZYG11A	TMPO
SIAH2	ZSCAN10	TNIK
TNIP2	UCHL1	POGZ
MPP1	RP11-132A1.4	MSMB
RYBP	PCMTD2	DNAJC15
RRM2	LECT1	UGCG
FKBP1A	MAP4K1	UACA
LGALS3	DNMT3B	PTPN13
NBPF20	TGIF2	ITGB5
ZNF706	SLC25A4	BEX1
GGA1	FAM71E1	FAM107B
SYNE2	PRDM14	SAV1
CD274	TUBA1A	AMOT
KYNU	EEF1B2	KITLG
PTEN	CBFA2T2	SP8
CCNE1	FUCA1	CYP1B1
TSPO	BRWD3	RAB3B
SLC43A2	CTBP2	CMBL
CREM	ZNF483	PTPRJ
MYCNUT	ITM2B	PPFIBP2
FAM46A	MTHFD2	WWC2
TDRP	SKA3	SOCS2
CLIC3	SEPHS1	CNN3
CDC37	DMD	FBXO17
DEDD2	MSH2	IBTK
KATNBL1	ORAI1	MOSPD1
EIF2AK1	SELENOM	NIPAL1
ARL5A	SLC39A10	CEACAM6
CGB3	DUSP16	CST4
TOMM5	SPG20	ZNF22
RAI14	PRDX4	AMOTL1
AURKA	DPPA3	RSRP1
SSR2	DNMT3A	PIAS1
TACC1	MCL1	PCGF5
FAM89A	DPF1	MX1
ETF1	RMND1	SH3BP4
RPL22L1	RGS10	KLHL5
PITPNB	ATG3	TPST2
TLK1	FXR1	GATM
NACA	PLEKHH3	BAMBI
CCR7	RPL3	COL27A1
LRRC59	G3BP2	NEDD4L
FURIN	RNF168	MAF
ZFHX3	CCDC80	SOX17
ATF3	DCP2	ABCC4
TREM1	TNRC6B	UBL5
TUSC3	IPMK	CA4
CALR	B3GNT7	IMPAD1
BAG3	HMGN5	TXNIP
VGLL1	ELF3	PHACTR2
LYN	UNC5B	SH3D19
PTN	UBE2C	C12orf49
SMIM13	MIF	PARD6B
SNRPG	TAF7	DENND2D
PPIB	SNRPC	PRSS23
UBALD2	FBP1	ACVR1B
CLMP	OAZ2	SSBP3
TBC1D20	AC009055.2	MFHAS1
ISYNA1	CNIH4	BRDT
KIF2A	MAP1B	TTN
SEC11C	PDCL3	FERMT2
UBE2A	TRIM26	FAM104B
FEN1	TCF7	NEO1
SPCS3	AASS	LPGAT1
LMAN1	CYP2S1	HSPA12A
SPCS2	AC064802.1	FGFR1
GSE1	LNCPRESS1	KRAS
HERPUD1	POLR3G	MMD
PGRMC2	ZNF208	GLRX
GCM1	CACUL1	OTX2
IGSF8	BARD1	JMY
SLC2A1	FXYD5	RHOBTB3
CEBPD	NMI	ALCAM
HMOX1	USO1	SLC44A1
HEBP2	SET	VANGL1
SLC25A37	SCAMP1	SEPHS2
FAM214A	TXLNG	HMGN3
RAP1B	TENT5B	FCER1G
GSKIP	ZNF121	IHH
IL1R1	KLF17	SBSPON
RPL6	RMND5B	ARHGAP42
AKR1B1	TBCD	DUSP9
DDX3X	Z82195.3	DUSP6
PPP1CB	KDM2B	CFLAR
WEE1	ZNF729	DUSP23
STT3B	FERMT1	CD109
C19orf53	JUNB	DHCR24
PSMB6	BIK	AP1S2
SIVA1	SLC6A8	KAT14
SSR3	JADE2	MYL3
HSD17B1	ICE1	PAPSS1
HMG20B	AGL	DLC1
YWHAZ	TRIM60	IL6R
H19	ACOT7	KLB
PWWP2B	ZNF578	LINC01767
MAFF	MRPL18	MAGED2
RHEB	ZNF589	SLC25A24
NR2F6	CAVIN1	CKAP4
PLPP5	YBX3	NUDT4
PDIA3	XIST	FGFR3
ST3GAL4	CYBA	MAGEA11
SLC7A11	RNF44	TCEAL9
CTNNB1	HHLA1	CPPED1
CLDN4	TGS1	TXN
PRR9	MIIP	CA2
DUSP5	TNFRSF8	CLTB
FKBP2	CD320	RPS28
EIF2B2	LRRK1	ANPEP
KCNN4	PLEC	DUSP1
CDC42EP1	KDM5B	BTG2
KIF13A	MTRNR2L12	ASPH
RCN1	LARP7	WDR72
QSOX1	ALPG	SLC9A3R1
ZNF292	TCOF1	VEGFA
SLC5A6	NCAPD3	MYL6
ADAMTS1		TMEM41B
FDX1		FMO5
POLR2F		IQGAP3
DNMT1		MYL9
AVPI1		GNPDA1
SH2D4A		LAMB1
DNAJB9		EXTL3
MTATP6P1		CDH11
C21orf91		TAGLN2
CALM1		PTMS
S100P		MAGEB2
PKIB		PARP16
NR2F2		S100A6
RAD51C		KCNJ13
TBX3		HIST1H4C
DSC2		ANKRD33B
HSPA1B		ID2
EIF4G2		SLC7A8
NDFIP2		KLF6
SIN3B		IGSF3
PLEKHF1		TMEM123
DNAJC3		TFF1
CUL2		SLC7A5
UBB		GLUL
SDCBP		SLC7A7
CSNK1A1		TM4SF1
PEG10		NPPB
SDF2L1		BEX3
RTN3		ROMO1
SWAP70		GPAT4
TFAP2A		SPTAN1
EIF5		SP5
BAIAP2		P3H2
ANXA5		TMED8
EPB41L3		RTL8C
ZFP36L1		ANXA3
LMO4		CGN
		TFPI
		LINC02387
		SH3RF1
		LPIN2
		GPRC5C
		RP11-511B23.1
		PKP2
		CTSB
		KLF5
		SH3BGRL3
		ELOB
		SLC39A14
		CCDC141
		PIK3R1
		KIFAP3
		MMP14
		P3H1
		TBL1XR1
		RTN4
		NEAT1
		PDLIM7
		TAGLN
		DYNLL1
		DST
		TSPAN14
		NCOA4
		SLC12A2
		FAM122B
		NDUFA1
		RIOK3
		RP3-394A18.1
		OST4
		FLNA
		ATP5F1E
		SSX2IP
		PVR
		FAM118A
		MEX3C
		TBC1D12
		AL161431.1
		CAPN2
		SPTBN1
		CHP1
		BANCR
		EPCAM
		TMED9
		UBASH3B
		FGA
		SCD
		SELENOI
		MYO1B
		AFF4
		SAMD8
		RP11-242D8.1
		LAMA1
		B4GALT4
		TMEM14B
		KPNA3
		UGDH
		ITGB1BP1
		EFNB2
		CAMSAP3
		TAOK3
		ATP5MD
		MSMO1
		ATP5MG
		S100A4
		DNAJC22
		TMCO1
		IER5
		FGG
		IL6ST
		RFK
		ENAH
		RHOC
		HMGCR
		ISG15
		DOT1L
		SEPP1
		FRMD6
		BASP1
		HNF4A
		BRD2
		CHI3L2
		COX8A
		FOSL2
		EIF4EBP1
		ELOC
		FANCA
		DMTN
		CER1
		ATP5MF
		ARL6IP1
		AFP
		FNIP2
		POLR2L
		NPC2
		GTF2A2
		APOB
		GDF15
		ATP2B1
		DBI
		SQSTM1
		AFDN
		HIF1A
		SNHG7
		ATP5ME
		FGB
		LRRC16A
		GNA13
		MPC1
		NID1
		KLF9
		SLC39A4
		PLOD1
		NUMB
		GTF3C6
		TMEM248
		FLNB
		ATP11A
		SIK3
		COBL
		PNPT1
		TULP4
		COPS9
		CDC42
		RPL39L
		SLC1A3
		FAM175A
		CLIC1
		COLGALT1
		RAB15
		LRCH1
