# Supplementary material for: An in vitro stem cell model of human epiblast and yolk sac interaction
Source: eLife. 2021 Aug 17;10:e63930. doi: 10.7554/eLife.63930 (PMC8370770; doi:10.7554/eLife.63930)
Supplement: Supplementary file 2. [file elife-63930-supp2.xlsx]

## Sheet: Sheet1
Supplementary Table 2
Extra-embryonic Endoderm	Definitive Endoderm
APOA1	CD48
S100A14	CDKN1C
APOA2	PEG10
FN1	MGST3
ETV3	MT-CYB
RSPO3	MT-ATP6
COL4A1	SERPINB9
GPX2	DKK4
APOC1	IGFBP2
MARCKS	MT-CO3
S100A16	CAV1
SPARC	CCND1
PPP1R14A	GATA3
CST1	XAGE2
S100A6	PTN
GPC3	PHLDA2
VCAN	MT-ND3
APOE	MFAP4
S100A13	MT-ND1
SERPINH1	WLS
MYL4	MT-ND5
AK4	CCNE1
CDH2	MT-ND4
KHDC1L	MT-CO2
FLRT3	GNB2L1
CKB	FABP5
C12orf75	LGALS3
TUBB4A	MT-ND4L
AC106864.1	CTSC
GJA1	MT-ND2
RNASE1	CCKBR
IDH1	KRT18
CST3	COX20
CD99	MT-ND6
CALD1	SMARCA2
TBCA	NPPA
COL4A2	RFPL2
ATP1B1	STC1
PODXL	GAPDH
BMP2	HSPA2
HPGD	PTPRE
NQO1	PEBP1
S100A10	VGLL1
FST	FSTL1
UACA	L1TD1
COL18A1	ALDOA
SERPINE2	DPPA5
ELOB	MT-CO1
ADD3	HSPD1
CALM2	HN1
FRZB	TENM3
SLC2A3	COTL1
PDGFRA	IFITM3
LGALS1	CREM
FOXA2	ATP5G3
DPP4	ODC1
ALDH1A1	SPCS3
IMPAD1	SH2D4A
LINC02413	AIF1L
LAMB1	TSPO
GATA6	GATA2
MGST2	GJA5
EGLN3	NET1
APOA4	CCND3
CADM1	EPRS
AXL	KDM1A
TPST2	VWA1
NEAT1	CDH1
LGALS2	COL9A3
TFF1	CEBPD
AHNAK	CCNB1
FZD5	PYGL
FADS3	UBE2E3
FAM107B	LMNB1
TLN2	AKR1B1
MYO9A	SLCO4A1
DYNLT3	COL5A2
FSCN1	CHMP1B
AC127024.7	COL1A2
BAMBI	CLMP
GSN	ERVMER34-1
SEPHS2	C14orf166
ALDH2	IMPA2
LINC00261	OPN3
PARD6B	PSIP1
ID2	SPCS1
FOXP1	C1GALT1
NID2	MORF4L2
ATP5MD	ATP5J
KLHL7	PAPOLA
TTN	PPARG
NLRP7	ATP6V1C2
PDPN	DUT
TMEM160	MAP3K8
TRIML2	ATP5D
NEDD4L	PRSS2
TCEAL9	DSEL
SLC7A8	DNMT1
ANPEP	PLK2
CTSE	LINC00643
RAB15	FYB
LPP	ATP5C1
GATA4	UTF1
DHCR24	RAB31
BRD2	CCR7
IGF1	SSB
KLF6	ISYNA1
LBH	EIF4A1
EXT1	PRSS35
F3	TUSC3
PTGR1	ATP5G1
APELA	C14orf2
ASRGL1	ZFHX3
MYBL2	REEP5
SPATS2L	HSD3B1
PCBD1	PERP
DMKN	IDH2
LARP6	DIMT1
DST	ATP5A1
CTSB	ATP5F1
PITX1	PHB
DUSP4	ATP5E
FGFR1	LEFTY2
ATP5F1E	CYBA
TAGLN2	C19orf43
UGCG	ASF1A
TCEA1	CARHSP1
SLC7A5	BAG2
LIFR	TIPIN
AKAP12	RGS16
LAMA1	C1QBP
RAB3B	ATP5J2
TMSB4X	TUBA1B
HOOK3	KHDC3L
ITGB5	ARID3A
TBL1XR1	USMG5
ELOC	ELOVL6
RPL36A	SVIP
GLUL	SHFM1
IL6R	HIST1H1D
PDLIM1	EFHD2
ZFAS1	HSP90AA1
ATP5MF	PTMA
PLPP3	PEG3
SNHG7	JAM3
UBL5	MUC15
FERMT2	WNT6
CFLAR	CYP26A1
TMSB10	AC010251.1
CNN3	MRPL36
TMPO	COL21A1
NUDT4	RAB11FIP4
CLU	RASA1
AMOT	NDFIP2
MX1	CAST
RHOBTB3	PRDX2
TFPI	CMAS
HSPG2	CLDN3
TMEM37	ATP5B
RTN4	IVNS1ABP
CAMK2D	DKK1
EPB41L2	ANGPT2
LLGL2	FXYD5
BIN1	NFE2L3
SYVN1	FREM1
HMGN3	KRT19
DNAJC15	STS
ATP5MG	CD320
TMEM41B	SLC7A2
STX3	CD55
ATP5ME	DPPA4
GPR85	UFL1
CNNM2	MYO1E
MEG3	TFAP2C
PROM1	AC069528.1
DYNLL1	CTSH
PITX2	CYB5A
MED13L	CCN1
RAP1A	RPL22L1
SSBP3	ACBD6
GSTO1	GNB4
PHACTR2	STRA13
C19orf33	SEPW1
OCLN	HINT1
CEACAM6	TFAP2A
OST4	TMEM243
FARP1	CEBPB
ZC3HAV1	SLC16A3
LHX1	KRT8
MDK	ATF7IP2
NCOA3	PDIA6
TMEM88	ACTC1
BRDT	PKIA
TMEM123	KRT7
TXNRD1	AIMP2
TXN	FEZ1
DENND2C	H2AFZ
N4BP2	MDFI
FRMD6	SWAP70
AC010359.3	DLX3
BEX3	PHGDH
MBOAT1	CAPN6
MIDN	CDC42SE1
POLR2L	RPS12
ANKRD1	MRPL11
ATP5MPL	CAB39L
HAS2	ATP5L
FAM213A	GRHL1
ZFP36L2	IRX2
PPIC	DLX5
ARF1	MT-ATP8
CENPV	SAC3D1
GNA13	ERVH48-1
GAMT	HLA-DRB1
BCYRN1	MT-RNR1
PVR	ABHD11
ASPH	RPL14
TTR	MYCN
AGPAT2	CLDN11
TMEM141	CLDN4
APOC3	RAD51C
OTX2	GCM1
IL32	UCHL1
P4HB	C9orf142
EIF4EBP1	MIXL1
RBBP6	TANC2
B2M	DNAJA2
CHI3L2	SPOCK1
LINC01405	HEBP2
SURF4	C11orf31
NUPR1	KLHL23
MAFF	SYNE2
TOP2A	CD47
MFGE8	TKT
TRIM2	RHOU
LPIN2	FAM60A
SLC44A1	LAP3
TMX4	IFITM1
CLIP1	TCEB1
CD81	KRT23
JMY	SLC36A4
TSPAN14	FAM162A
ANXA3	CD3EAP
PKP2	NAV1
CGB7	ATP5I
EXTL3	TERF1
SEM1	FADS2
LDLR	ADAMTS1
DPPA3	LINC00493
KLF4	MTAP
FGB	CCBL2
SLCO2A1	EEF1E1
ATF3	BCAR4
RPL26	CLIC3
CMTM7	GALNT1
AC011447.3	GREB1L
ST6GAL1	PLSCR1
ZNF121	PGF
MCUR1	CTDSPL
CA2	PPME1
CMBL	TACC1
NCALD	SYNGR1
RGS9	ATP5O
SLC1A3	NCAPG
CACHD1	TEAD3
F2RL1	MED12L
MYL6	HIST1H1A
H3.3B	TET2
VEGFA	AGPAT5
SDC4	WDR3
RPS4Y1	DIAPH2
P4HA1	KHDRBS3
GPT2	ARID5B
VIL1	HIST1H1B
UQCRH	C5orf30
MMD	SFRP2
RRBP1	IFNGR1
AFP	LEFTY1
UQCR11	PKIB
ROMO1	SP6
GSTP1	LDB2
SCD	IGSF10
SEC61B	TARS
NDUFC1	MYEOV2
ACTG1	DIO3
MT2A	RP11-172H24.4
GSTA2	C17orf89
P3H2	GPSM2
PRRG3	WBSCR22
MAVS	GYPE
GPRC5B	OSBPL1A
UQCRQ	XAGE3
RNF125	MGST1
PYGB	FHL2
MOSPD1	KIAA0101
GNG2	CCN2
NEU1	WHSC1L1
MCU	DIRC2
SPTAN1	VKORC1L1
FGFR3	C20orf24
RPS27	C16orf13
NDUFB7	PSAT1
KRAS	FAM49A
TYRO3	BTG3
KPNA3	RPL6
PDXK	USP15
AL360020.1	CRISPLD1
RPS15	NINJ1
TENT5A	TPM1
ZSWIM7	TMEM261
SAMD4B	TXLNA
ZBTB20	SDF2L1
MPC2	SUN3
TF	SH3BP5
CENPE	UTP11L
SNRPN	GNG12
OGA	EMC6
IGFBP6	DSC2
PAQR8	KIAA1217
MT.TN	PLAU
S100P	STK26
CSTB	GPX8
SP8	VGLL4
FZD7	ATPIF1
ATRX	MBNL3
ELL2	YWHAH
CXADR	SELK
CASK	ST3GAL4
COX7C	FHL3
CST4	SERHL2
DDAH2	IRX4
CAMK2N1	TEX30
CHST5	COLEC12
MAGED2	CDCA7
SH3BGRL3	ATP5G2
ZFAND5	SKIV2L2
INSR	UFD1L
CDKN1A	SUPT4H1
DUSP9	MAL2
AL359976.1	FADS1
MT.ND4L	SEMA3E
PXDN	MYCNUT
TNNT1	TSC22D1
IQGAP2	SLC5A6
NXF1	TMSB15B
TMEM14B	MYLPF
NEUROD2	C21orf59
RPS27L	CCDC109B
KLF5	CD200
RSRP1	PRMT5
TMC7	DOCK9
FAM198B	C16orf74
RSBN1L	MBNL2
HNF1B	DRAM1
NECTIN2	CPVL
MDM2	TMEM154
MBD3	CCND2
EBP	FAM98A
B4GALT4	GNA12
RAB11A	FAM89A
KAT14	LAGE3
ABCA1	ABCF2
DDIT3	SORT1
TBC1D12	ASMTL
DCUN1D3	NGFRAP1
NODAL	HSBP1L1
CGB5
ARHGAP5
UTRN
MYO1B
PPIF
TULP4
WDR82
SELENOI
CHST3
EHD1
MYOF
GNPDA1
ZCCHC24
ARMT1
AURKB
MKRN1
CELA3B
CACNA1A
MAP1LC3B
RB1CC1
EHBP1
SFRP1
AFDN
WWC2
ENO2
EEF2
ATP5F1D
KCNQ1OT1
GALNT7
FAM83H
AD000090.1
CGB8
SRP19
ZNRD2
CDH11
TNFRSF1B
BPESC1
SELENOS
MACC1
MRPL14
C8orf33
MSMO1
FGA
S100A1
GPRC5C
PLEKHJ1
AC105999.1
ITM2C
LINC02582
NDUFB4
LINC02387
ZYX
CARMIL1
PTPN9
FAM118A
C1orf122
RPS28
TMEM135
DAAM1
ATP11C
H1.0
RIOK3
RPS11
ACSL3
CGB3
EPSTI1
SEC63
SNHG9
ATP5F1A
AC060780.1
SAR1A
TM4SF1
KRTCAP3
SNHG12
CGN
FCER1G
SERINC5
KCNJ3
COX7B
SYNE3
CENPA
SF3B2
PCSK1N
SAV1
RRAD
NUCB1
RPL28
DUSP1
GNA11
RPL15
LSM4
ARL6IP1
DEFA6
AC018521.5
RPL35
BCL7C
BAK1
MMP15
SGK1
REEP6
AQP3
SLC39A14
AMOTL1
PCDH9
CDC42EP4
TNFRSF12A
WIPF2
HELZ
SAMD8
PCDH7
SLC3A2
ANXA1
RABAC1
GCNT3
RAB17
C12orf49
NIPAL1
SLC9A3R1
CA4
DLC1
IQGAP3
CHD2
IBTK
MTTP
GPAT4
MED10
PPDPF
ITGB1BP1
WASF3
AP3D1
UBASH3B
NUMB
MRPS36
ARL4D
COX5A
AC006509.1
NFAT5
TOLLIP
LINC00607
INPP5F
BANCR
EPB41L1
C15orf39
PRR9
ABL1
STK40
MRPL20
DOT1L
GLIPR2
HES1
BMP6
RBM47
RHPN2
SOCS2
CERS6
ANKRD11
SPATS2
MEX3C
GJB1
BEX1
POGZ
SLC2A4
CAMSAP3
DCAF5
COX6B1
UBAP1
POLR2K
DDIT4
LYPD6B
DHRS3
TNNC1
ELP5
FAM126B
PDGFA
SMOX
PTTG1IP
SVBP
FLNB
KLHL5
RPL21
FOSL2
CLDN19
VPS37C
SYNGR2
CYP11A1
LRIG3
BAP1
PCGF5
PRTG
ITIH5
AP1S2
H1F0
FRMD4A
PROCR
TMBIM6
PIK3R1
IGSF3
KCTD6
PPFIBP2
ZDHHC9
FAM83F
FZD4
SETX
CIZ1
ERF
EIF1B
MRS2
WASL
DTNB
ATP5PB
YPEL2
GTSF1
RPS17
ATP5F1B
JUN
ACVR1B
ANKRD33B
CAPG
SGTA
CPPED1
SMAP1
CCT7
AGRN
MKNK2
GRB10
FAM122B
ALDH3A2
AC245060.6
AC010624.5
FTL
ANGPT1
TMED8
FOXH1
YTHDF1
FNIP2
AC245595.1
FBXO17
FBXO21
DNMT3L
RPS15A
RPL39
TNS3
SEC24A
POLR2G
MYH7
PLCXD1
UBE2C
WDR72
ABHD5
FRAT2
SOX17
MT.TC
TMEM65
PDZRN3
PBDC1
PIAS2
SIPA1L2
ZNF316
EMP2
TOMM7
MEST
RPS10.NUDT3
PPP2R2D
SMIM26
ATP13A3
FAU
RPL37
SBNO1
RPS10
NDUFAF8
LSM6
RPL38
EGR1
LAMTOR2
KIFAP3
NR2F6
TRIM13
SP100
XACT
NDUFB6
TSPAN13
MFHAS1
ID1
HDAC7
HIC2
MYO6
FXR1
CASTOR2
THBS1
DPYSL3
RPL26L1
SF3B6
BTG2
ABCC4
SPINT1
SLC25A36
AKT1
CD46
KCNJ13
HK2
BOD1L1
USO1
TPM2
SBSPON
ZNF106
ATXN2
NEO1
UGDH
RSU1
GOLGA3
ADAM9
RUNX3
TRAM1
MIR22HG
HNF4A
ARHGAP42
P3H1
LETM1
SH3D19
CLTB
NXN
CKAP4
AKAP17A
B4GALT1
FBXO2
PALM2AKAP2
ACLY
TMEM39A
LONP2
SREBF2
PAGE2
S100A4
LGR5
ARHGAP45
OTUD7B
PHPT1
UBALD2
GLDC
EDARADD
CLK1
RASD1
GNAI2
RAP2B
ATP2B4
TGIF1
CREB3L2
PABPN1
RPL41
RALGPS2
KRTCAP2
COPE
TIMM44
CPN1
NRGN
DUSP6
JADE1
MPP6
PPFIA1
PLEC
PRAP1
ZFP42
YIPF4
HIP1R
PPP1R3B
FBXO33
TSEN54
MMP14
LHFPL2
MT.TA
HPDL
SP5
RCBTB1
BCL7A
EFNB2
ABL2
ZNF426
ARSA
MAEL
SRF
MAP3K1
SENP2
COL27A1
C2orf68
SULF2
CD109
HMGB3
MAP7
VSIR
PPP1R15A
EPS8L2
FNBP4
TXNIP
SERPINB6
HIPK2
FAM104B
RPL10
PTPRJ
FLOT1
MINDY2
REX1BD
NFIA
DNAJC22
CTSA
OSER1
NORAD
KLB
AC234782.4
SRSF6
SLC25A5
JUND
RTL8C
NNT.AS1
DUSP5
AFF1
FOS
MLXIP
TDGF1
RPS18
NDUFA13
ABHD12B
IER2
IHH
AL035078.1
RPL36
KIF5B
IFNGR2
KLF9
SLC52A2
GASK1B
LRRC8A
TMED2
SAT2
DUSP23
PAQR7
MYL9
HELLPAR
MEG8
PCNX4
HACD1
PAPSS1
TMEM147
ACBD3
PARP16
AC074117.1
ALCAM
RTP1
RACK1
OSBP
HSPA1B
EPPK1
CYP1B1
DCTPP1
ATG3
MCL1
FRAS1
RAD54L2
RPL13A
PCBP4
TNRC6C
C12orf57
PLXNA1
SELENOP
GLRX
LARP1B
ZNF703
TIMM10
AMHR2
GREM1
SDE2
ANXA2
ARL6IP4
NUFIP2
DIPK1B
CCDC34
ADAM19
KDM7A
GBP1P1
TMEM92
GADD45G
MAF
PDLIM5
MARS1
OR2M3
KCNJ16
HHEX
ZNF318
HABP2
PORCN
KITLG
MANF
NEURL1
MRPL12
ZFX
SIAH1
NCK2
BICD1
CAPN2
SMPD1
SGO1
ANKRD13D
NME2
HIST1H4C
TCF7L1
AC005062.1
PRSS23
EDA
AL137800.1
ITGA6
PRKX
UNC93A
JARID2
PPM1F
FNBP1
SPTY2D1
FBRS
FMO5
ACSL1
GALNT10
PABPC1
H2AC20
BCDIN3D
PAN3
RPS8
SLC9A1
MTND6P4
WDR26
AC020656.2
AMOTL2
MVD
PPM1D
TMEM56
MIA2
MFN1
UBR2
LPIN1
MIDEAS
SESN3
FURIN
EIF5
RAB5IF
ARHGAP8
ZNF600
TRMT10A
PICALM
MICOS13
ARIH1
EPB41L4A.AS1
LPGAT1
SGPP1
TMEM109
RPL27A
BET1L
TTC39B
UBA52
FTH1
GNL1
XIAP
CDC6
LPCAT1
CDR2
RPL37A
CNOT9
PTAR1
DNPH1
ST5
SLC31A1
ARHGAP1
KIAA1671
INMT
MYDGF
UPF2
FAM114A1
LINC01006
KIT
ZNF292
MRPS28
ZNF280A
AKAP8
CNIH4
NDUFA12
CDCA5
RNF139
TRIM38
TRABD2B
MRPL16
MRPL54
ZNF532
NQO2
ARAF
PSMG3
SERTAD3
BNIP2
IPO5P1
RHEB
GRN
ISG15
RCOR3
RPS21
RPS29
SRGAP2C
LATS2
PRNP
PCDHA4
GGA1
SGO2
SERPINB1
RRAGC
GAS6
VPS18
KDELR2
MLF2
NIFK
SQLE
FGF23
GINS3
ETFDH
ATG12
ST14
RP11-148B6.1
OTUD6A
PKDCC
ANKS1A
ATP5MC1
MYO10
RHOF
LINC01320
CORO2A
LAPTM4A
MTREX
SLC48A1
KIDINS220
DENND2D
LRP2
MSMB
CDV3
SLC66A2
TGFBR1
RBPMS2
RNF213
TP53INP2
VTI1A
CYP1B1.AS1
HSPB1
EFNA5
BRD1
VANGL1
PLD3
PDLIM7
PPRC1
WWC3
SEMA6D
IRGQ
TRIM61
DDC
SPSB2
FAM83G
GSC
LINC02381
CAMK2B
DDX24
SEPP1
DMTN
RPL27
ENO3
TRIR
CYP20A1
GPR161
C7orf26
PLCE1
RIPOR2
RPL35A
MRPL2
ARHGAP12
FAM168B
ISOC2
FLVCR1
SMIM29
FAM102A
FBLIM1
COP1
RPL34
PTPN13
MORC4
CAPN13
GDAP2
SH3BP4
CTSZ
SPDL1
DEPTOR
SSX2IP
AGPAT1
CDK2AP2
MAGEB2
WDR66
ZNF296
PIAS1
SUDS3
KALRN
STMN1
SACM1L
MARK2
EDEM2
SKA3
TACC3
SEC24D
ARL8A
SLC25A24
JADE2
CDT1
MED29
GRK3
UQCR10
TNIK
NMT2
GPD1L
ADAM32
PKP4
SCAMP2
JCAD
ABCC10
ARL5B
XPO6
SLC33A1
HJURP
MCRIP1
TMEM41A
N4BP1
PHLDB3
VPS51
SMAD7
CDCA3
CLDN6
EIF5A2
PDPR
SLC4A8
DSN1
FAM169A
LINC01767
HESX1
HS6ST1
E2F3
PACS1
CHD9
BICC1
PHC2
UNC119
UFD1
C4orf3
ZNF302
RNH1
CCNDBP1
CDC37
PLCXD2
BMPR1B
CUBN
ATG5
SURF2
LINC01559
OSBPL3
FLRT2
SLC39A5
DNAJC3
CSNK2B
YWHAG
SIN3A
MYL3
LRP6
EEF1B2
SULT1A1
CDYL
TET1
DEPDC7
XYLT2
ESAM
RPL31
ATG14
ZNF746
ZHX1
GCKR
SESTD1
TRIM44
AP002954.2
SHROOM3
MARCHF6
JAK1
HSPA12A
KLK13
CLTRN
SHB
KMT2A
PLCG1
CWC25
CEP55
NEK2
PITPNC1
GADD45A
NPPB
NPLOC4
ITPKA
FANCD2
SLC6A19
KHDC4
NSD1
HARS1
CHIA
STK17A
EPC2
SYMPK
R3HDM2
NONO
NELFB
PTPN11
ATP6V0A2
ANK2
SNRPG
MRPL18
B4GALT7
SLC25A45
PXK
NEK6
RNF114
LMNB2
DMAC1
PLEKHO1
TENT4B
HOXB7
SDC1
CRYBA4
MTF1
LSS
MLST8
SOD2
TIAL1
C6orf106
FAM151A
LSM3
SPRY1
RELA
COL6A3
ARSE
DAXX
GALNT6
MYRF
ERVH48.1
SNHG15
SNORD99
CHST2
GCNT2
CCDC57
CTBP2
IGHA1
SERTAD2
PACSIN2
SMAD3
BCAR3
COL4A5
ANLN
CCDC174
LRRC23
INTS12
ERVW.1
UBE2O
ERVV.2
PRAG1
WEE1
LINC01091
KMT5A
CGB1
RHOBTB1
ZBTB8A
LINC00667
NSMAF
PER2
NEDD4
STK4
CDX2
EEF1G
SMARCD2
TCOF1
TMEM63B
ECT2
TNFSF9
COPRS
KIF13B
