# Supplementary material for: An in vitro stem cell model of human epiblast and yolk sac interaction
Source: eLife. 2021 Aug 17;10:e63930. doi: 10.7554/eLife.63930 (PMC8370770; doi:10.7554/eLife.63930)
Supplement: Supplementary file 3. [file elife-63930-supp3.xlsx]

## Sheet: Sheet1
Supplementary Table 3
Pre-implantation ExEn	Post-implantation ExEn
EIF4EBP3	CST1
POLR3G	CGA
CEBPD	NPPB
AIF1L	APOA2
IMPA2	S100A6
TMEM191C	CD24
PPARG	TFF1
MED12L	GDF15
HSPE1	AC106864.1
DRAM1	TAGLN
MBNL3	MT2A
VGLL1	MALAT1
EIF1AY	DDIT4
TRIM55	SH3BGRL3
C15orf61	AXL
ATP6V1C2	APOB
CCND1	MEG3
TRMT6	LINC02413
RPL30	FTL
TXN	LY6E
FAU	TTR
CAV1	KRT18
AC002310.1	TMSB4X
AC083843.3	HAS2
ANO1	FTH1
TBCA	FN1
SH2B2	AL161431.1
AC013403.2	MT1X
MT.ND4L	SOX4
SMIM13	PDLIM1
RAB40B	LHX1
MCRIP2	ANKRD1
RPS13	CGB8
CCDC62	NQO1
LINC01234	MYOF
RPS4Y1	LGALS1
PYGO1	CST3
RPL37	TMED9
GGCT	C12orf75
KLHL2	S100A16
NFE2L3	RPL17
EEF1AKMT4	FZD5
AC005062.1	IFITM3
POLR1E	BEX3
ZNF277	PRSS23
FAM72C	ZNF292
DDT	LIFR
NDUFAB1	TCEAL9
PPAN	ANKRD11
RPL35A	MAGED2
AC007161.1	JUND
ADCY5	APOE
S1PR2	STK40
ZBTB16	HERPUD1
LINC01004	KRT19
AC074194.1	AFP
RECQL4	CGB3
CCDC85B	GPC3
CCNE1	AC060780.1
RCL1	C16orf72
COX7B2	MDK
FABP5	RNASE1
TDRD3	GLIPR2
ACSL4	ATP5IF1
PTPN1	CALD1
RAD51C	NTS
SLC27A2	PDIA4
STMN1	LCP1
RGS10	GLRX
RPL7A	RHOBTB3
RHOT2	RAB17
CASP6	LGALS2
GJB7	FLNB
AC010422.2	LAPTM4A
E2F8	UBE2A
ZNF335	ENC1
ZNF414	TNNT1
LINC00641	ERRFI1
PHGDH	DMKN
MAP1S	NEAT1
THEMIS2	JUN
EEF2	PCDH7
SNRPG	GPM6A
ADAL	ERBB4
RPS8	SQSTM1
RPS3	CTSE
GAPDH	TGIF1
GJA5	CRABP2
TWIST1	AL360020.1
AP000432.2	PNRC1
SLC66A2	DAAM1
UQCRH	ID3
ZNF783	AP1S2
SACS	APOA1
PRPS2	CALU
RPL38	GSTA2
TBC1D1	MMP15
HSPA2	FZD7
MTCO2P22	KIF21A
AL109811.1	TNFRSF21
TTC21A	ZFP36L1
DUOX2	CD99
ARHGEF39	SLC38A2
SEPTIN10	NFKBIA
KRTCAP3	LMNA
SNRPD2	SSR2
MOB3B	MFGE8
LINC00562	PPIB
SPC24	OSER1
CELF2	LARP1B
RPL5	MYL7
SOCS3	MARCKS
NPC1L1	ID1
ASAP3	IFRD1
SET	S100A10
URB2	PPDPF
SNRPB	PLSCR2
KIF20A	CXCR4
BCAT1	GFPT1
EEF1B2	EPSTI1
CREB3	TM9SF3
RRS1	COL1A1
CEP55	HSD17B4
ZNF695	CYP11A1
SOAT1	ZNF445
COX5B	PTPN13
OFCC1	ZNF703
GLMN	AL009031.1
CAMLG	HOPX
EIF2AK4	MORF4L2
LYN	DSP
LINC00665	F2RL1
NAA30	UGCG
MARCHF8	ACBD3
NCLN	ARL4D
OSBPL2	SESN2
AL159166.1	MPC2
CDCA5	ACTN1
ADGRG3	GAMT
TMEM167B	GSTO1
GPAT3	ITM2B
WNT3	SWAP70
CYB5R1	SPATS2L
PLEKHA8	B2M
PXK	IFITM1
RPL4	VIM
CAPN10	TUBB2A
MEIS1	COL18A1
GAR1	CAMSAP3
PPIA	MYADM
AGBL3	DNAJC10
DCUN1D3	HOOK3
FAM174C	DYNLT3
LAYN	LEPROT
COX20	CD151
CLMP	RPS27L
MRAP2	SNX9
RPL19	GNA13
MT.TC	FGFR3
TPX2	FRZB
CNN2	CAPG
OR5H1	PIK3R5
PARVA	DDAH2
ARRB1	NPC2
MANEA	CHP1
NCOR2	TMSB10
EXOSC4	FKBP2
ATG14	F3
OVGP1	CNIH4
RPS11	HHLA1
HRAS	TXNIP
CHMP4A	B3GNT2
MYH6	MT1F
FNBP1	GNAI2
ATG13	MAP1LC3B
RPL23	XIST
ZNRD2	RNASEK
RPLP0	MYL6
CEP112	P3H2
ZNF426	MESD
ESRP2	MT-CO2
RPS5	TDGF1
RPS15	TMEM245
CTSC	CALM2
RPS2	CCDC81
UBA52	LRRK1
ZBTB2	DNAJC3
COQ10B	ABCC4
ELP5	MAFG
OGDH	ILK
ABCC5	OPTN
EDNRA	FOXH1
HSPD1	GNB2L1
RPL28	DAP
RPS23	CSNK1A1
GPD1L	KRAS
PLK1	SRI
STK35	MT-ND3
TRIM2	SEPHS2
EDN3	PLPP1
ITIH5	KCNJ16
C1orf112	HES1
PLCXD1	DNAJC22
COX5A	AL135790.1
MRPL16	TM4SF1
RAD9A	HELLPAR
SGTB	LRRC59
TMA7	MYO6
ZNF34	SAT1
WWC3	LAPTM4B
ZNF600	SIN3A
RNF151	SRP54
PTMA	HACD1
AKAP12	LINC01304
PTN	STC1
SLIRP	SLC4A2
RTKN	NRBF2
PPM1G	ARHGAP5
AL354893.1	PKDCC
NETO2	RPL39
ECE1	PTMS
CCT7	EPB41L2
CASP8AP2	CMAS
KHDC1L	IGF2BP1
ERBIN	HSPB8
CCDC6	TNFRSF1B
AMOTL2	DECR2
RAMAC	PTS
ANP32E	QSOX1
AC084036.1	TPGS2
COPS8	AQP3
AL023803.2	SH3RF1
MPP6	IGF2R
MAP2K3	BASP1
RPL27	ALCAM
HSP90AA1	FAM83G
GRHL1	TFPI
SLC1A3	PDE5A
RRP7A	IFT22
RPS20	KDM5B
AC090994.1	FLRT3
RPS15A	SULF2
RPS28	YTHDF1
EML4	MYL9
TMC7	EHD1
POP5	NME2
FAM83D	CREB3L2
RPL31	MMP14
RPL26	YPEL2
LINC01206	RTN4
UHRF1	CCDC174
MCUR1	NUDT4
ZBTB14	RAB22A
RPS6KB2	PORCN
MBD6	GNAI3
KCNH1	RPL10
UBE2G1	DCP2
SP5	VAMP8
CCNDBP1	LPP
LARP4B	PPP1R15B
MIR302CHG	FAM213A
GINS3	ARF5
SLC4A11	WBP1L
SMARCD2	UBE2M
RPL36	CYSTM1
RPS10	MT-ND4
PTRH2	EIF2B2
PRTG	TET2
MTND6P4	DHRSX
BOLA3	CACNA1A
PLOD3	ERMP1
VPS18	XBP1
LONP2	ST6GAL1
DCAF5	DNAJC1
DCLRE1A	ZNF121
GRB10	TKT
RPS25	ESRG
CLPP	SELENOW
RPL22L1	FLRT2
GALNT7	IHH
TOMM7	CLIC4
KMT5A	TCEB2
UFM1	LRIF1
GATAD2B	DAPK3
RPSA	ANGPT4
OR8B4	CEP70
RAPGEF2	SLTM
ATP6V0A2	DUSP9
BAZ2A	DHCR7
NRM	MGST2
FAM189B	APP
PPM1A	SELENOP
SPATS2	MT-CO1
HEBP2	HMGA2
MKRN1	CRHBP
ARHGAP1	CDK6
TPT1	INTS3
PAPOLA	CGB1
ATP7B	IRAK1
AURKA	CTSZ
AC139256.2	GCLC
CHIA	SEC31A
SERTAD2	CHAC1
PABPC1	MT-CYB
ARHGDIA	FHDC1
SPECC1	KLF6
ZNF296	IFT20
TCF3	TPP1
COL23A1	PLSCR1
AC239799.2	ELF3
RPL6	MT-ATP6
NUCB1	PYM1
MRPS34	PLXNA2
ATP1A3	ANXA6
DNAJA1	FBXW5
SPTLC3	TRDN
ZBTB10	SEC14L1
ZFAS1	MT-ND2
AIF1	CYR61
NDUFAF3	PLAAT3
DNAJC19	FGA
GABPA	SGPL1
CABIN1	ACOT7
E2F2	TUT4
TUBB4A	ATP6V0D1
TF	HDHD3
SLC6A8	POLR2J3.1
RPL41	RPP21
IGF1	ATRX
ERBB2	EGR1
AC020663.3	BUD23
ABHD17C	STAM2
CGRRF1	FBXO2
CENPF	LYPD6B
KIF15	CLDN7
NDUFC1	DNAJC4
SLC7A6	NECTIN2
COLEC12	CYBA
SLX4IP	FKBP11
GRK3	PGM1
HDAC7	CARS1
PATE4	VHL
RPS24	RPL36A
SLC35B4	TNNC1
CGAS	AC245060.6
HAVCR2	RPS10.NUDT3
PTEN	ELP6
AC145207.5	ANXA4
POLD1	TM4SF5
UBB	ITCH
NCAPD3	PGRMC2
ATP5F1B	GOLT1B
TPTEP1	MT-ND5
MTHFD2	KIAA1551
WRN	CERS4
SPRY1	MSL1
GNAS	SAT2
RPL18A	SFRP1
CITED2	KIF23
NLN	CXADR
ARL14EP	GATA3
SLC3A2	FGD6
RPS16	TRMT10A
FASTKD1	ANKMY2
SIVA1	CRYZL1
RPL15	SDC1
YWHAG	LHFPL2
UACA	CPM
AC010624.5	LINC01405
NF2	USP15
SSR1	RNF213
TFEB	RABEP2
MFHAS1	ENO2
SLC33A1	AEBP2
RPL32	ULK1
FGFR2	GMPR
FANCC	HLA-DRB1
TACSTD2	SOCS6
CERS6	NMD3
NID1	MYLIP
NHP2	ZNF587
EEF1E1	Z82195.3
EDEM2	TBCEL
GABARAPL1	KCNK1
DHCR24	MAEL
SVBP	MAN1B1
HELLS	B4GALT4
C1QBP	CGB2
KLHL15	RAMMET
DEXI	CASK
MRPL36	TVP23B
CCN2	FOLR1
LARS2	LCOR
SPP2	IBTK
MRPL12	LPGAT1
ICE1	RIC8A
MCM7	PCBD1
	H19
	ARID1B
	FKRP
	CFLAR
	SH3GLB2
	ADAMTS12
	CXXC5
	PCTP
	DPP4
	SLC13A5
	PACS1
	RYBP
	TNIK
	KIF16B
	ZBED1
	MEST
	S100A4
	SAP30L
	PIP4K2A
	FANCA
	RACK1
	C4orf46
	MXI1
	ZNF486
	DYRK1A
	AC010359.3
	TRAPPC5
	MT-ND1
	GNB2
	CHST9
	BMPR2
	HES4
	RAI14
	MT-CO3
	ELL2
	AC018521.5
	PHLDA2
	HLA.DRB1
	VEGFA
	TENT5A
	TGFBR3
	C1orf21
	CKAP4
	ARL4A
	TP53I11
	SPTBN1
	TPM2
	NES
	ID4
	HLA-C
	NMRK2
	GGH
	KIF4A
	TBPL1
	CD9
	AL359976.1
	SIPA1L2
	TMEM141
	PFDN5
	FAM168A
	WWP1
	DAB2
	IPO5P1
	ARHGAP35
	STAT1
	CHAF1A
	CALCB
	NFIL3
	ANK2
	HEY1
	ARSA
	MED29
	TGFBR2
	MLLT3
	EOMES
	ATP1A1
	ATP11A
	TMEM63A
	UPP1
	RRBP1
	LINC01767
	CTR9
	POLB
	FAM107A
	MAGEB2
	PSG5
	MIA2
	NIPAL1
	CYC1
	ZNF761
	COPS9
	NQO2
	RBMX2
	EPHA2
	ZNF880
	H2AFY2
	MYCT1
	GALNT10
	ROR1
	GIPC1
	RALBP1
	NPNT
	NONO
	TOB1
	CDH5
	CRELD2
	SIPA1
	RNF145
	ALPG
	PCDH1
	LRIG3
	OTUD6A
	KRT23
	ALDOA
	NLK
	SNRPN
	MT-ND4L
	BNIP3L
	MIDEAS
	HSPA13
	BICC1
	ITM2C
	ACVR2A
	GMEB1
	EPCAM
	TSC22D3
	PLK2
	CORO2A
	TMF1
	PRSS8
	SPOPL
	TMEM92
	ADM
	RAB11B
	AGPAT3
	SERINC5
	SSR3
	PRXL2A
	DBN1
	CRIP1
	EIF3C
	SYNJ2BP
	VLDLR
	MARVELD2
	BPESC1
	PTPRG
	STXBP6
	MUC4
	FAM193A
	COLGALT1
	PTGR1
	TIAM1
	TYRO3
	TUSC3
	RALGPS2
	OLFML3
	EXO1
	SLAIN2
	PSMA6
	FERMT2
	LYPD3
	SUSD2
	RHOA
	CD274
	TMEM258
	MALT1
	CDH2
	MMP2
	OSGIN1
	PLCG1
	DUSP16
	TGFBR1
	ZIC2
	HSPA14.1
	GABBR2
	TMEM64
	EPAS1
	MAL2
	ARHGAP17
	AFF1
	MMP24OS
	ZNF638
	KRTCAP2
	NIBAN2
	TTN
	MSH2
	PEF1
	KHDC3L
	PPP1R2
	FNBP4
	SKI
	ZNF302
	LPIN1
	TAF4
	QPCT
	ALAS1
	RCE1
	FAM46A
	ARF6
	ACOX3
	AL356534.1
	GRIN2B
	GANAB
	GCKR
	ATG101
	CDKN3
	SOWAHB
	RND1
	SNAP29
	BX255925.3
	CAP1
	BOLA2B
	RIPOR2
	ANAPC15
	CD300E
	OCLN
	RASL12
	OGA
	MYO10
	IER5
